# Supplementary material for: Reliability and Validity of Running Cadence and Stance Time Derived from Instrumented Wireless Earbuds
Source: Sensors (Basel). 2021 Nov 30;21(23):7995. doi: 10.3390/s21237995 (PMC8659722; doi:10.3390/s21237995)
Supplement: Supplementary file 1 [file sensors-21-07995-s001.zip › Data_P11_speeds_2.csv]

time	S7kmh_force_plate_1	S7kmh_force_plate_2	S7kmh_force_plate_3	S7kmh_earbuds_1	S7kmh_earbuds_2	S7kmh_earbuds_3	S10kmh_force_plate_1	S10kmh_force_plate_2	S10kmh_force_plate_3	S10kmh_earbuds_1	S10kmh_earbuds_2	S10kmh_earbuds_3	S13kmh_force_plate_1	S13kmh_force_plate_2	S13kmh_force_plate_3	S13kmh_earbuds_1	S13kmh_earbuds_2	S13kmh_earbuds_3	max_force_plate_1	max_force_plate_2	max_force_plate_3	max_earbuds_1	max_earbuds_2	max_earbuds_3
0	-34.298	-47.61	805.834	-0.64697	0.63232	0.061523	-32.917	36.636	64.802	0.25488	-0.05127	-0.12012	1.062	40.1	33.745	-0.064453	0.014648	0.20898	NaN	NaN	NaN	NaN	NaN	NaN
0.002	-23.891	-27.149	779.447	-0.63281	0.62402	0.061767	5.531	41.826	77.364	0.24102	-0.049512	-0.12305	20.562	19.4496	21.6165	-0.066895	0.01709	0.20215	NaN	NaN	NaN	NaN	NaN	NaN
0.004	-21.972	-16.289	737.2743	-0.62158	0.61768	0.058594	-56.3154	33.222	49.29	0.22178	-0.046778	-0.12354	26.997	22.7726	27.8236	-0.06543	0.021484	0.19482	NaN	NaN	NaN	NaN	NaN	NaN
0.006	-17.663	-19.14	725.763	-0.60742	0.60498	0.053223	-0.644999999999996	-0.8161456	56.886	0.20029	-0.040137	-0.12276	33.076	17.9653	26.489	-0.064698	0.034912	0.19287	NaN	NaN	NaN	NaN	NaN	NaN
0.008	-11.909	-28.159	721.764	-0.59717	0.59912	0.052246	-10.256	18.0395	33.0747	0.17969	-0.035937	-0.12236	12.794	19.97899	42.6269	-0.059082	0.04541	0.17383	NaN	NaN	NaN	NaN	NaN	NaN
0.01	-26.079	-31.321	725.559	-0.58105	0.58887	0.04541	-35.193	14.0056	34.5171	0.15723	-0.02832	-0.11963	16.9	26.524297	29.827	-0.047363	0.061035	0.16992	NaN	NaN	NaN	NaN	NaN	NaN
0.012	-2.265	-44.1405	706.494	-0.57154	0.57984	0.044189	20.876	-3.3877	35.804	0.13623	-0.017969	-0.11611	-18.711	24.5698	42.1	-0.035645	0.068359	0.16943	NaN	NaN	NaN	NaN	NaN	NaN
0.014	-15.583	-42.8685	692.107	-0.55811	0.5708	0.043945	-15.705	26	20.8153	0.11475	-0.010156	-0.11211	-20.48	32.063	28.9586	-0.010742	0.092773	0.15918	NaN	NaN	NaN	NaN	NaN	NaN
0.016	-1.042	-43.3456	683.344	-0.54199	0.55859	0.036621	-21.751	-9.9378	40.1092	0.089356	-0.0027344	-0.1082	-12.808	22.5399	41.48	-0.00048825	0.10669	0.15576	NaN	NaN	NaN	NaN	NaN	NaN
0.018	-8.469	-42.289	669.771	-0.53125	0.54883	0.037598	27.928	4.4101	58.072	0.066797	0.0085937	-0.10459	-11.953	38.383	40.908	0.026367	0.11865	0.15186	NaN	NaN	NaN	NaN	NaN	NaN
0.02	1.098	-42.0107	640.898	-0.51172	0.54492	0.032227	4.199	20.3382	48.593	0.041016	0.011719	-0.099609	-21.094	9.2796	55.684	0.048828	0.13623	0.14209	NaN	NaN	NaN	NaN	NaN	NaN
0.022	7.629	-37.6499	637.76	-0.49561	0.5288	0.026367	37.607	-1.235	42.441	0.019922	0.022949	-0.097266	-5.772	14.7167	36.244	0.061523	0.13818	0.14258	NaN	NaN	NaN	NaN	NaN	NaN
0.024	28.9457	-27.334	614.561	-0.47754	0.52344	0.020996	43.351	29.0142	21.1009	0.00039062	0.028711	-0.094043	-45.735	-12.98618	53.775	0.081055	0.15283	0.13232	NaN	NaN	NaN	NaN	NaN	NaN
0.026	9.439	-26.612	604.255	-0.45459	0.51416	0.018555	28.254	12.944	19.8705	-0.019922	0.036523	-0.088183	-46.034	30.8891	34.7513	0.104	0.16504	0.12109	NaN	NaN	NaN	NaN	NaN	NaN
0.028	1.846	-25.7368	599.909	-0.44629	0.50098	0.01416	63.735	-2.3946	28.3203	-0.037598	0.041992	-0.087891	-32.673	14.591	29.672	0.11475	0.1748	0.11768	NaN	NaN	NaN	NaN	NaN	NaN
0.03	6.886	-17.7846	567.618	-0.42676	0.49072	0.0092773	23.404	23.088	4.0758	-0.055664	0.052246	-0.088867	7.582	50.342	22.43	0.13184	0.19287	0.11035	NaN	NaN	NaN	NaN	NaN	NaN
0.032	-2.338	-0.7831	554.287	-0.40991	0.48291	0.0058594	38.736	-1.06256	17.191	-0.067969	0.060254	-0.088867	-30.206	14.59159	30.266	0.1477	0.20312	0.10156	NaN	NaN	NaN	NaN	NaN	NaN
0.034	-11.087	3.2212	539.5555	-0.39258	0.47266	0.00097656	41.553	27.6179	29.3004	-0.079492	0.065625	-0.089355	-10.677	32.332	31.6747	0.15918	0.21143	0.097656	NaN	NaN	NaN	NaN	NaN	NaN
0.036	-22.233	-8.7063	524.341	-0.37402	0.45508	0.0019531	17.4	45.219	28.6268	-0.091211	0.073438	-0.088574	-32.3522	2.2623	34.84	0.16455	0.23828	0.088867	NaN	NaN	NaN	NaN	NaN	NaN
0.038	-6.706	-10.8665	506.195	-0.36328	0.44629	-0.0053711	34.862	24.601	44.486	-0.098731	0.081348	-0.094629	-14.375	20.3094	23.1642	0.16309	0.25049	0.085938	NaN	NaN	NaN	NaN	NaN	NaN
0.04	-30.01962	2.7574	499.301	-0.34326	0.43115	-0.0063477	9.206	45.428	33.88	-0.10205	0.091309	-0.09668	4.166	6.459	36.442	0.15967	0.26416	0.081543	NaN	NaN	NaN	NaN	NaN	NaN
0.042	-29.9986	18.2908	480.853	-0.33179	0.41528	-0.010254	-7.454	23.3611	26.8443	-0.10313	0.095313	-0.096875	16.169	21.4553	51.395	0.14917	0.27783	0.081543	NaN	NaN	NaN	NaN	NaN	NaN
0.044	-19.1522	6.037	482.419	-0.31592	0.40479	-0.010742	31.64	-8.4513	49.669	-0.10264	0.10576	-0.10527	24.831	7.0285	41.048	0.13428	0.29297	0.081543	NaN	NaN	NaN	NaN	NaN	NaN
0.046	-34.1224	-8.2578	464.7803	-0.29639	0.39014	-0.015137	-9.588	13.538	31.142	-0.099122	0.11358	-0.11309	25.526	28.266	43.441	0.11621	0.31055	0.08252	NaN	NaN	NaN	NaN	NaN	NaN
0.048	-39.9175	-5.3311	443.1336	-0.28613	0.3833	-0.019531	-11.409	-1.5341	28.0219	-0.088965	0.11768	-0.11777	32.471	16.796	26.29535	0.10449	0.31885	0.084473	NaN	NaN	NaN	NaN	NaN	NaN
0.05	-46.8412	-12.9078	429.7778	-0.26074	0.36865	-0.023438	14.84	15.3527	32.7065	-0.077637	0.13086	-0.12402	3.861	12.7327	42.372	0.087402	0.33447	0.086914	NaN	NaN	NaN	NaN	NaN	NaN
0.052	-44.7945	-8.6181	421.3005	-0.24829	0.35889	-0.02417	-49.2561	36.2779	20.0353	-0.065821	0.13008	-0.12793	25.234	5.165	28.2864	0.069092	0.3435	0.088379	NaN	NaN	NaN	NaN	NaN	NaN
0.054	-43.8743	1.53	425.075	-0.23584	0.34619	-0.026367	-18.241	8.0872	51.557	-0.050586	0.13633	-0.13652	38.121	11.0808	26.44639	0.060059	0.3584	0.098145	NaN	NaN	NaN	NaN	NaN	NaN
0.056	-30.3209	6.893	399.376	-0.21973	0.33545	-0.028809	-19.605	39.218	42.154	-0.031446	0.14726	-0.13847	37.103	13.968	3.731	0.042969	0.36963	0.10352	NaN	NaN	NaN	NaN	NaN	NaN
0.058	-30.13	-13.1458	394.125	-0.21289	0.32715	-0.032715	-38.0251	28.744	42.703	-0.013574	0.15322	-0.14346	19.425	6.6899	45.3939	0.037109	0.37793	0.10693	NaN	NaN	NaN	NaN	NaN	NaN
0.06	-34.8559	-10.1235	390.479	-0.19629	0.31494	-0.036133	7.083	7.824	70.533	0.0019531	0.16211	-0.1499	-6.95200000000001	15.6329	56.083	0.020996	0.39307	0.10205	NaN	NaN	NaN	NaN	NaN	NaN
0.062	-20.1435	1.4459	378.305	-0.1831	0.30713	-0.035156	-28.275	21.715	56.862	0.022949	0.16494	-0.15381	-14.894	7.4688	79.55	0.0039063	0.40918	0.10742	NaN	NaN	NaN	NaN	NaN	NaN
0.064	-28.252	9.87602	368.371	-0.17822	0.29883	-0.036133	-17.54	-12.316	58.1966	0.042481	0.16982	-0.15615	17.455	12.274	79.4247	-0.02002	0.42529	0.10938	NaN	NaN	NaN	NaN	NaN	NaN
0.066	-12.081	3.157934	355.7615	-0.16211	0.2915	-0.039551	13.154	-4.886	51.4803	0.056543	0.16748	-0.16123	-11.647	-15.381	93.922	-0.069336	0.44434	0.11523	NaN	NaN	NaN	NaN	NaN	NaN
0.068	-3.439	0.404	343.8434	-0.15869	0.28076	-0.039063	-28.268	3.488	64.6839	0.072559	0.17832	-0.16651	-21.781	-17.41	123.931	-0.10303	0.4541	0.11133	NaN	NaN	NaN	NaN	NaN	NaN
0.07	11.467	9.6553	319.3102	-0.14941	0.26953	-0.041016	10.427	-38.792	118.131	0.085449	0.18506	-0.16748	-43.2855	-30.827	167.883	-0.17627	0.47852	0.11621	NaN	NaN	NaN	NaN	NaN	NaN
0.072	3.229	8.0485	310.911	-0.14599	0.26953	-0.039063	9.76300000000001	-29.689	137.937	0.091992	0.18848	-0.16943	-36.3135	-7.386	191.4378	-0.24561	0.49292	0.11548	NaN	NaN	NaN	NaN	NaN	NaN
0.074	16.806	19.0919	308.703	-0.13721	0.26074	-0.04248	4.294	-47.415	166.529	0.094434	0.19434	-0.1751	-82.781	-22.6177	258.0037	-0.31592	0.51611	0.11816	NaN	NaN	NaN	NaN	NaN	NaN
0.076	20.427	20.3165	324.617	-0.12988	0.25391	-0.037598	68.487	-52.7627	202.697	0.085449	0.20137	-0.17744	-60.59	-5.335	340.3955	-0.4209	0.54834	0.11621	NaN	NaN	NaN	NaN	NaN	NaN
0.078	22.436	20.9211	312.739	-0.12695	0.24609	-0.039063	37.305	-10.741	238.076	0.07041	0.20352	-0.17568	-76.1727	-27.65969	443.9995	-0.48242	0.57031	0.10889	NaN	NaN	NaN	NaN	NaN	NaN
0.08	10.462	20.6484	303.9589	-0.12549	0.24219	-0.044434	45.015	-33.8633	290.295	0.039551	0.20947	-0.17285	-21.278	32.0509	546.149	-0.61963	0.61279	0.10742	NaN	NaN	NaN	NaN	NaN	NaN
0.082	17.035	16.1728	305.381	-0.12232	0.23218	-0.042481	65.152	-10.908	342.923	-0.0018552	0.21475	-0.17471	-19.115	42.757	655.56	-0.74243	0.63965	0.1084	NaN	NaN	NaN	NaN	NaN	NaN
0.084	30.388	22.562	305.077	-0.12305	0.22852	-0.044434	-1.868	36.0947	399.138	-0.052442	0.21904	-0.17168	3.232	97.63	798.69	-0.87695	0.67383	0.10791	NaN	NaN	NaN	NaN	NaN	NaN
0.086	24.708	26.181	299.267	-0.11963	0.2168	-0.044434	25.741	39.944	528.6299	-0.10556	0.22842	-0.17207	5.85600000000001	58.8	928.58	-1.0762	0.73535	0.094238	NaN	NaN	NaN	NaN	NaN	NaN
0.088	6.217	31.553	284.555	-0.1167	0.2168	-0.045898	-4.821	104.151	630.329	-0.15977	0.24229	-0.17461	39.041	65.423	1027.54	-1.1851	0.75244	0.083984	NaN	NaN	NaN	NaN	NaN	NaN
0.09	16.998	20.3827	289.619	-0.11719	0.20801	-0.050781	-41.023	118.605	703.016	-0.22412	0.25293	-0.17676	58.409	8.156	1115.2874	-1.4136	0.80225	0.066895	NaN	NaN	NaN	NaN	NaN	NaN
0.092	15.53	14.36243	294.003	-0.11939	0.2063	-0.044922	8.1314	105.7684	800.926	-0.29121	0.26973	-0.18282	85.364	-2.057	1200.2082	-1.5752	0.84375	0.04541	NaN	NaN	NaN	NaN	NaN	NaN
0.094	-1.003	14.3141	292.987	-0.12305	0.19629	-0.045898	-39.196	134.056	868.157	-0.36944	0.28623	-0.17803	60.752	-82.8	1273.312	-1.7207	0.88477	0.024414	NaN	NaN	NaN	NaN	NaN	NaN
0.096	-12.436	20.1887	285.0575	-0.12695	0.19287	-0.044922	-16.5611	72.593	936.376	-0.45498	0.30146	-0.17725	64.846	-99.012	1290.325	-1.8848	0.93457	-0.0063477	NaN	NaN	NaN	NaN	NaN	NaN
0.098	5.28	19.4136	286.545	-0.12939	0.19141	-0.041992	5.22	32.2636	982.81	-0.55635	0.32022	-0.17529	71.559	-179.867	1243.532	-1.9302	0.95752	-0.017578	NaN	NaN	NaN	NaN	NaN	NaN
0.1	-13.52	27.636	282.279	-0.13379	0.18359	-0.043945	-48.528	16.9103	989.4673	-0.66992	0.34375	-0.17236	99.1847	-197.7968	1216.173	-1.957	1.002	-0.040527	NaN	NaN	NaN	NaN	NaN	NaN
0.102	-14.864	35.804	269.102	-0.13867	0.18311	-0.042969	-1.616	-75.128	1010.3062	-0.80156	0.3791	-0.17539	121.0923	-258.836	1184.988	-1.8794	1.0283	-0.045654	NaN	NaN	NaN	NaN	NaN	NaN
0.104	-18.356	26.6961	267.862	-0.14111	0.18311	-0.039551	12.083	-91.6677	1006.624	-0.94561	0.41474	-0.16494	133.891	-222.056	1132.002	-1.7378	1.0493	-0.038574	NaN	NaN	NaN	NaN	NaN	NaN
0.106	-10.375	26.4476	278.473	-0.15088	0.17822	-0.042969	-12.035	-130.5371	995.746	-1.107	0.45029	-0.14854	143.446	-181.226	1075.949	-1.519	1.0591	-0.053223	NaN	NaN	NaN	NaN	NaN	NaN
0.108	-10.34	28.504	282.13	-0.15625	0.17407	-0.042481	-0.363	-166.151	989.609	-1.2788	0.48857	-0.12207	132.408	-119.098	1056.613	-1.3823	1.0396	-0.074707	NaN	NaN	NaN	NaN	NaN	NaN
0.11	-31.713	33.274	282.301	-0.16211	0.1709	-0.037109	-35.6319	-118.9548	968.682	-1.4624	0.52197	-0.091309	94.979	-104.526	1049.6349	-1.1016	0.95313	-0.092285	NaN	NaN	NaN	NaN	NaN	NaN
0.112	-20.242	27.6867	273.623	-0.16602	0.16895	-0.041504	-45.755	-123.15	947.682	-1.6565	0.55791	-0.046484	60.363	-93.4042	1082.067	-0.93359	0.86914	-0.088379	NaN	NaN	NaN	NaN	NaN	NaN
0.114	-10.635	26.096	280.632	-0.17334	0.16455	-0.043945	-38.348	-94.444	929.141	-1.8557	0.59971	-0.0041992	77.3259	-79.941	1083.2656	-0.80469	0.80469	-0.086914	NaN	NaN	NaN	NaN	NaN	NaN
0.116	-7.704	22.951	281.646	-0.17969	0.16699	-0.049805	-85.76	-37.808	883.9666	-2.0312	0.6415	0.025097	66.954	-68.773	1100.496	-0.69336	0.79004	-0.077148	NaN	NaN	NaN	NaN	NaN	NaN
0.118	-15.946	22.209	284.169	-0.18213	0.16724	-0.042969	-69.408	-48.404	881.789	-2.1604	0.67236	0.026465	52.0505	-39.68	1096.52	-0.67725	0.81299	-0.075684	NaN	NaN	NaN	NaN	NaN	NaN
0.12	1.483	12.5075	291.003	-0.18945	0.16406	-0.041992	-67.677	-0.524000000000001	895.1271	-2.2085	0.70166	0.013672	23.485	-70.69	1093.453	-0.73096	0.8833	-0.092285	NaN	NaN	NaN	NaN	NaN	NaN
0.122	7.794	23.9137	300.554	-0.19824	0.16406	-0.046387	-81.381	21.036	870.3444	-2.1657	0.73936	0.0045898	4.878	-99.089	1097.2877	-0.78271	0.92724	-0.095215	NaN	NaN	NaN	NaN	NaN	NaN
0.124	5.532	35.134	290.853	-0.20166	0.16113	-0.043457	-30.6328	-28.873	891.071	-2.0453	0.79034	-0.0020508	-36.225208	-209.312	1119.892	-0.83203	0.94531	-0.081055	NaN	NaN	NaN	NaN	NaN	NaN
0.126	-1.033	30.64	296.449	-0.21484	0.16797	-0.044922	-16.902	-4.874	880.537	-1.8823	0.81729	-0.0032227	-76.94	-263.7877	1155.332	-0.92383	0.94336	-0.0625	NaN	NaN	NaN	NaN	NaN	NaN
0.128	20.432	26.6906	316.413	-0.22802	0.17138	-0.044922	33.476	-60.46	894.8886	-1.6896	0.81192	-0.0069336	-117.645	-350.779	1235.2886	-1.0083	0.94922	-0.068359	NaN	NaN	NaN	NaN	NaN	NaN
0.13	21.602	29.2582	332.952	-0.24072	0.17334	-0.043457	56.701	-119.517	929.846	-1.4854	0.77148	-0.018066	-131.662	-323.101	1295.926	-1.1831	0.95557	-0.068848	NaN	NaN	NaN	NaN	NaN	NaN
0.132	9.627	31.4561	324.103	-0.25488	0.18164	-0.04248	12.175	-131.394	925.207	-1.2787	0.69356	-0.036719	-132.073	-378.282	1342.304	-1.3269	0.98413	-0.067383	NaN	NaN	NaN	NaN	NaN	NaN
0.134	2.768	31.8564	324.478	-0.26611	0.18604	-0.04541	36.846	-211.766	961.229	-1.0793	0.62071	-0.059082	-126.992	-314.405	1370.882	-1.4683	1.0142	-0.060547	NaN	NaN	NaN	NaN	NaN	NaN
0.136	18.642	29.5434	344.333	-0.28516	0.19141	-0.041016	40.233	-222.352	1030.346	-0.92735	0.56055	-0.093066	-135.669	-335.606	1405.901	-1.6304	1.0347	-0.039551	NaN	NaN	NaN	NaN	NaN	NaN
0.138	25.779	45.132	338.156	-0.29712	0.19654	-0.039307	19.411	-224.2103	1052.526	-0.80224	0.52764	-0.12617	-127.007	-235.8816	1458.4267	-1.7075	1.0513	-0.038086	NaN	NaN	NaN	NaN	NaN	NaN
0.14	15.769	48.835	340.823	-0.31348	0.20117	-0.02832	58.793	-270.91	1125.241	-0.71484	0.50195	-0.14258	-117.167	-229.2378	1525.199	-1.8594	1.0664	-0.041504	NaN	NaN	NaN	NaN	NaN	NaN
0.142	13.112	42.9742	337.858	-0.33447	0.20898	-0.03125	41.191	-222.79	1173.28	-0.68565	0.52217	-0.1665	-89.072	-118.694	1538.777	-1.9551	1.0635	-0.042236	NaN	NaN	NaN	NaN	NaN	NaN
0.144	21.718	44.477	358.495	-0.34229	0.21533	-0.027832	22.004	-214.072	1216.537	-0.68652	0.56113	-0.17129	-49.608	-124.445	1573.531	-2.041	1.0674	-0.032227	NaN	NaN	NaN	NaN	NaN	NaN
0.146	0.858000000000004	42.648	381.664	-0.36035	0.21729	-0.029297	74.075	-200.624	1291.751	-0.75137	0.63613	-0.16348	5.125	-56.105	1561.362	-2.125	1.0703	-0.02002	NaN	NaN	NaN	NaN	NaN	NaN
0.148	1.352	41.605	387.0702	-0.37085	0.22437	-0.023925	43.503	-113.629	1288.782	-0.87383	0.7209	-0.18535	8.206	-97.35	1549.975	-2.1523	1.0703	-0.017578	NaN	NaN	NaN	NaN	NaN	NaN
0.15	-16.325	25.3974	406.311	-0.37598	0.22949	-0.018066	70.9316	-137.5597	1302.6045	-0.98047	0.7627	-0.21094	-10.887	-37.612	1533.925	-2.1934	1.0566	-0.016113	NaN	NaN	NaN	NaN	NaN	NaN
0.152	-17.035	40.0585	417.601	-0.38574	0.23438	-0.016113	80.852	-127.3464	1333.61	-1.0366	0.74736	-0.20254	-5.313	-91.895	1551.904	-2.2087	1.0471	-0.010254	NaN	NaN	NaN	NaN	NaN	NaN
0.154	-24.585	50.154	428.297	-0.39258	0.23877	-0.011719	71.826	-88.304	1290.426	-1.1316	0.73008	-0.19317	0.0929999999999964	-50.4765	1586.16	-2.2222	1.0356	-0.0043945	NaN	NaN	NaN	NaN	NaN	NaN
0.156	-31.867	56.629	424.245	-0.4043	0.24414	-0.0078125	77.686	-131.571	1315.945	-1.2582	0.73867	-0.18457	22.136	-112.805	1647.4891	-2.228	1.0376	-0.0053711	NaN	NaN	NaN	NaN	NaN	NaN
0.158	-8.933	53.462	439.764	-0.41016	0.24683	-0.0068359	50.417	-74.011	1347.899	-1.3843	0.77197	-0.16006	66.1997	-107.166	1667.841	-2.2305	1.0352	-0.0073242	NaN	NaN	NaN	NaN	NaN	NaN
0.16	-21.658	50.3463	466.788	-0.4126	0.25098	-0.0043945	18.911	-93.681	1378.882	-1.4941	0.81836	-0.13867	112.134	-161.146	1713.971	-2.2319	1.0278	0.0019531	NaN	NaN	NaN	NaN	NaN	NaN
0.162	-14.837	40.0535	477.617	-0.42334	0.25732	0	15.259	-137.572	1439.561	-1.5907	0.87685	-0.1206	75.796	-135.267	1731.954	-2.2419	1.0217	0.012207	NaN	NaN	NaN	NaN	NaN	NaN
0.164	-41.0767	46.0759	487.571	-0.43115	0.25879	0	12.498	-90.4051	1458.914	-1.6746	0.92031	-0.099611	101.6039	-146.3853	1730.943	-2.25	1.0195	0.020508	NaN	NaN	NaN	NaN	NaN	NaN
0.166	-16.58	51.87	491.6969	-0.44678	0.26611	0.00048828	20.641	-142.287	1483.481	-1.7539	0.95977	-0.089844	92.983364	-100.515	1740.246	-2.2593	1.0337	0.01709	NaN	NaN	NaN	NaN	NaN	NaN
0.168	-14.81	59.911	519.126	-0.45972	0.26977	0.0039063	19.15	-124.322	1502.679	-1.8201	0.98379	-0.076758	124.137	-106.656	1745.067	-2.2507	1.0246	0.039795	NaN	NaN	NaN	NaN	NaN	NaN
0.17	-19.183	71.879	518.7345	-0.47852	0.2749	0.0063477	-11.715	-93.9368	1503.214	-1.8647	0.99268	-0.078613	97.47	-90.0315	1745.352	-2.25	1.0234	0.04541	NaN	NaN	NaN	NaN	NaN	NaN
0.172	-27.7213	67.971	535.822	-0.50537	0.27783	0.0029297	14.153	-154.134	1529.601	-1.8994	0.99785	-0.093359	101.465	-80.3729	1711.1934	-2.2378	1.0298	0.031738	NaN	NaN	NaN	NaN	NaN	NaN
0.174	-20.874	77.622	543.41	-0.52246	0.28418	0.011719	24.741	-119.7267	1558.839	-1.9199	1.0114	-0.11055	33.998	-65.8435	1685.292	-2.2285	1.0273	0.036133	NaN	NaN	NaN	NaN	NaN	NaN
0.176	0.244999999999999	76.576	563.26	-0.55811	0.2915	0.0078125	13.874	-144.9835	1570.474	-1.9407	1.0211	-0.12968	-11.363	-15.675	1643.917	-2.1831	0.9751	0.070313	NaN	NaN	NaN	NaN	NaN	NaN
0.178	-18.9211	74.0093	588.107	-0.58301	0.30054	0.0097656	40.554	-191.748	1600.066	-1.9509	1.0356	-0.154	-61.6823	9.4429	1628.6117	-2.1597	0.98194	0.07666	NaN	NaN	NaN	NaN	NaN	NaN
0.18	-19.2418	68.0336	608.22	-0.60889	0.30469	0.012695	26.007	-102.811	1573.201	-1.9585	1.0337	-0.18604	-43.075	39.735	1592.7155	-2.1206	0.98584	0.086914	NaN	NaN	NaN	NaN	NaN	NaN
0.182	-1.162	64.0429	631.342	-0.646	0.31104	0.01123	5.186	-100.4128	1544.6442	-1.9638	1.0284	-0.21259	-52.7848	24.1441	1619.929	-2.0835	0.99268	0.071777	NaN	NaN	NaN	NaN	NaN	NaN
0.184	6.35	73.748	636.357	-0.66943	0.31885	0.013184	4.959	-48.0243	1533.738268	-1.9679	1.02	-0.24287	-48.284	28.464	1614.359	-2.0845	0.98291	0.046875	NaN	NaN	NaN	NaN	NaN	NaN
0.186	5.36	79.188	638.6289	-0.70898	0.32617	0.0087891	-1.706	22.146	1483.625	-1.9663	1.006	-0.27373	-82.543	4.2239	1609.9414	-2.0386	0.93701	0.022949	NaN	NaN	NaN	NaN	NaN	NaN
0.188	-14.436	72.924	663.236	-0.74536	0.3352	0.0097656	34.478	-42.004	1521.2574	-1.9642	0.99238	-0.29951	-83.026	42.1506	1575.032	-2.0007	0.91723	0.029541	NaN	NaN	NaN	NaN	NaN	NaN
0.19	15.594	73.3672	673.417	-0.77539	0.34473	0.0087891	47.302	-6.1375	1563.231	-1.9531	0.97949	-0.33105	-80.9214	22.874	1594.6733	-1.9956	0.91553	0.036621	NaN	NaN	NaN	NaN	NaN	NaN
0.192	-7.622	84.517	680.6001	-0.82959	0.35693	0.00097656	18.527	-1.263	1564.9233	-1.9281	0.96445	-0.36328	-79.50851	64.876	1560.7112	-1.9917	0.93018	0.040527	NaN	NaN	NaN	NaN	NaN	NaN
0.194	5.5216	95.306	698.529	-0.84961	0.36328	0.0087891	13.745	-41.629	1600.985	-1.8999	0.94228	-0.38427	-73.88417	22.482	1612.289	-1.9819	0.93213	0.050293	NaN	NaN	NaN	NaN	NaN	NaN
0.196	-20.866	70.9723	724.057	-0.90186	0.37598	0.0073242	37.273	36.7971	1585.617	-1.869	0.90908	-0.40029	-52.687	50.4164	1600.164	-1.9365	0.94531	0.052734	NaN	NaN	NaN	NaN	NaN	NaN
0.198	-7.929	77.24	750.832	-0.94068	0.39185	0.0041504	49.62	-6.156	1551.0049	-1.8402	0.87383	-0.41172	-69.061	-21.7216	1628.011	-1.903	0.93579	0.05249	NaN	NaN	NaN	NaN	NaN	NaN
0.2	-10.493	83.6754	758.103	-0.97217	0.40186	0.0048828	78.738	-6.926	1568.94	-1.8242	0.8457	-0.41748	-83.639	12.905	1603.531	-1.8711	0.92383	0.059082	NaN	NaN	NaN	NaN	NaN	NaN
0.202	-19.602	97.752	752.7093	-1.021	0.42139	0.0039063	81.77	34.207	1533.51554	-1.8131	0.81777	-0.41973	-62.536	-24.814	1575.602	-1.8335	0.91455	0.0625	NaN	NaN	NaN	NaN	NaN	NaN
0.204	-23.3346	103.243	776.964	-1.0425	0.43408	0.0063477	78.6076	-58.954	1571.758	-1.8254	0.8	-0.41484	-46.552	48.56	1537.031	-1.8081	0.91162	0.061523	NaN	NaN	NaN	NaN	NaN	NaN
0.206	-36.9545	109.799	793.574	-1.0854	0.4458	0.0078125	73.326	-28.2189	1603.483	-1.8554	0.79649	-0.40664	-0.634999999999998	37.869	1526.911	-1.7734	0.90234	0.07959	NaN	NaN	NaN	NaN	NaN	NaN
0.208	-18.8539	107.964	782.49676	-1.115	0.46045	0.0063476	58.4174	-38.296	1581.162	-1.8872	0.79326	-0.40596	1.89	120.5132	1469.873	-1.7456	0.8999	0.075684	NaN	NaN	NaN	NaN	NaN	NaN
0.21	-34.6095	105.768	800.887	-1.1387	0.47168	0.0048828	60.1553	-75.634	1587.425	-1.9155	0.79932	-0.39795	65.8671	108.543	1462.195	-1.7217	0.89063	0.074219	NaN	NaN	NaN	NaN	NaN	NaN
0.212	-29.9896	109.132	817.432	-1.1621	0.48242	0.0048828	65.025	23.301	1546.939	-1.9398	0.80274	-0.40078	59.7466	157.283	1446.32221	-1.6875	0.87695	0.087402	NaN	NaN	NaN	NaN	NaN	NaN
0.214	-40.7541	111.719	852.801	-1.1699	0.49219	0.0092773	62.531	5.9797	1505.411	-1.9581	0.8165	-0.40654	63.6619	138.271	1453.7235	-1.6733	0.87061	0.094238	NaN	NaN	NaN	NaN	NaN	NaN
0.216	-30.278	110.628	860.291	-1.1836	0.50391	0.0014648	64.232	41.415	1499.528	-1.9643	0.82198	-0.40341	85.5039	195.685	1451.32	-1.6362	0.85889	0.092773	NaN	NaN	NaN	NaN	NaN	NaN
0.218	-31.8854	105.1594	858.833	-1.1861	0.5083	0.006836	39.874	118.262	1473.725	-1.9646	0.82842	-0.40986	113.991	178.233	1421.538	-1.6165	0.83667	0.092041	NaN	NaN	NaN	NaN	NaN	NaN
0.22	-33.697	119.561	875.987	-1.1929	0.51416	0.015137	61.459	59.977	1485.3125	-1.957	0.83008	-0.42188	113.8036	216.684	1393.781	-1.5898	0.81836	0.10303	NaN	NaN	NaN	NaN	NaN	NaN
0.222	-21.2795	125.299	887.769	-1.1899	0.52393	0.018066	59.196	103.425	1490.971	-1.9448	0.82979	-0.42529	106.535	167.0538	1353.7805	-1.5659	0.79541	0.10547	NaN	NaN	NaN	NaN	NaN	NaN
0.224	-31.2236	139.879	879.243	-1.1875	0.5293	0.020996	43.733	103.654	1448.0179	-1.926	0.81768	-0.42725	63.499	171.155	1313.7134	-1.5508	0.78906	0.11133	NaN	NaN	NaN	NaN	NaN	NaN
0.226	-18.543	139.5	883.325	-1.1914	0.53906	0.030762	46.123	57.3892	1450.703	-1.912	0.81299	-0.43037	47.167	145.295	1289.0224	-1.5156	0.76465	0.11865	NaN	NaN	NaN	NaN	NaN	NaN
0.228	-6.908	126.6924	906.605	-1.1941	0.54444	0.036865	40.12	136.883	1407.184	-1.9003	0.81064	-0.42998	25.301	155.286	1277.062	-1.4782	0.74731	0.11914	NaN	NaN	NaN	NaN	NaN	NaN
0.23	-10.906	123.4883	925.515	-1.1909	0.5498	0.041504	23.927	79.925	1387.33	-1.8809	0.80957	-0.42432	35.071	145.137	1242.7277	-1.4395	0.72559	0.12158	NaN	NaN	NaN	NaN	NaN	NaN
0.232	-12.667	132.226	931.789	-1.2051	0.55859	0.045898	39.582	57.9733	1387.692	-1.8606	0.81513	-0.4208	23.134	151.832	1229.535	-1.3862	0.70361	0.12109	NaN	NaN	NaN	NaN	NaN	NaN
0.234	-9.996	140.958	927.873	-1.2129	0.56445	0.049805	42.192	86.678	1367.62	-1.8336	0.81563	-0.42588	33.46	151.4398	1160.9464	-1.3569	0.68799	0.12012	NaN	NaN	NaN	NaN	NaN	NaN
0.236	8.562	136.499	938.844	-1.2319	0.57764	0.060059	10.741	13.293	1375.99	-1.8117	0.81094	-0.42002	-10.746	171.3359	1154.0143	-1.3066	0.64844	0.12109	NaN	NaN	NaN	NaN	NaN	NaN
0.238	-7.874	148.872	929.065	-1.2637	0.5918	0.064453	29.122	81.4177	1368.794	-1.7855	0.80469	-0.4082	-19.631	211.659	1120.9146	-1.2605	0.62671	0.11841	NaN	NaN	NaN	NaN	NaN	NaN
0.24	12.576	154.625	944.398	-1.2822	0.59375	0.073242	17.391	91.1746	1325.2098	-1.7651	0.7915	-0.39893	-21.788	235.122	1100.079	-1.2168	0.60742	0.11328	NaN	NaN	NaN	NaN	NaN	NaN
0.242	9.137	167.975	939.537	-1.3169	0.6167	0.075195	42.509	68.866	1316.005	-1.7469	0.78769	-0.38789	3.984	283.034	1050.842	-1.1655	0.56299	0.10449	NaN	NaN	NaN	NaN	NaN	NaN
0.244	20.7813	168.766	939.189	-1.3435	0.62524	0.084228	38.352	156.938	1295.954	-1.7261	0.78369	-0.37861	21.877	288.477	1028.322	-1.1289	0.54785	0.10352	NaN	NaN	NaN	NaN	NaN	NaN
0.246	-2.144	160.1351	954.541	-1.3721	0.63672	0.088867	38.837	104.92311	1268.536	-1.7046	0.77236	-0.36377	1.054	296.93	978.817	-1.0664	0.52344	0.094727	NaN	NaN	NaN	NaN	NaN	NaN
0.248	-16.6099	158.4698	963.975	-1.4097	0.64893	0.091797	71.557	119.548	1272.951	-1.6825	0.75986	-0.3456	-59.525	255.37	962.762	-1.0249	0.50049	0.083497	NaN	NaN	NaN	NaN	NaN	NaN
0.25	-1.295	153.5102	980.367	-1.4268	0.6543	0.097656	70.6255	176.654	1232.248	-1.6675	0.7417	-0.3335	-60.306	277.509	877.582	-0.96729	0.479	0.081543	NaN	NaN	NaN	NaN	NaN	NaN
0.252	-1.043	168.5856	966.253	-1.459	0.66895	0.10547	73.9181	131.2926	1212.608	-1.6343	0.72666	-0.32685	-65.893	220.685	846.4922	-0.91211	0.44727	0.072754	NaN	NaN	NaN	NaN	NaN	NaN
0.254	6.087	178.894	945.998	-1.4814	0.67773	0.10132	52.688	208.844	1174.3513	-1.6074	0.70351	-0.31289	-26.268	238.87	813.632	-0.88037	0.43408	0.063965	NaN	NaN	NaN	NaN	NaN	NaN
0.256	-19.296	177.3016	947.037	-1.4941	0.68945	0.10449	30.528	206.401	1116.685	-1.5746	0.68086	-0.30039	-34.045	193.578	783.798	-0.82568	0.39893	0.067871	NaN	NaN	NaN	NaN	NaN	NaN
0.258	-5.034	176.618	963.605	-1.5117	0.69434	0.10449	53.297	158.776	1116.738	-1.5432	0.66143	-0.28701	-5.898	232.905	745.931	-0.78125	0.3872	0.055175	NaN	NaN	NaN	NaN	NaN	NaN
0.26	-20.335	183.87	979.61	-1.5151	0.69775	0.10107	53.286	207.54406	1092.1666	-1.5098	0.6377	-0.27637	19.382	203.838	732.904	-0.73682	0.36475	0.048828	NaN	NaN	NaN	NaN	NaN	NaN
0.262	-20.1114	200.438	991.7258	-1.5288	0.71338	0.097656	33.965	139.946	1068.135	-1.4712	0.61455	-0.26025	36.675	241.381	682.2683	-0.68994	0.34619	0.036621	NaN	NaN	NaN	NaN	NaN	NaN
0.264	-43.304	219.853	1018.179	-1.531	0.71802	0.095703	56.103	153.4426	1073.014	-1.4319	0.58701	-0.24854	45.029	191.8272	688.145	-0.6626	0.31885	0.043945	NaN	NaN	NaN	NaN	NaN	NaN
0.266	-45.328	238.3058	1049.843	-1.5405	0.7251	0.089355	63.5495	191.25	1031.525	-1.3929	0.56787	-0.23682	75.255	244.92	644.472	-0.59863	0.30078	0.033203	NaN	NaN	NaN	NaN	NaN	NaN
0.268	-32.7253	260.5802	1078.827	-1.562	0.73096	0.07959	34.994	131.5118	1014.975	-1.3572	0.54082	-0.22871	99.715	208.768	608.52	-0.55957	0.28321	0.033447	NaN	NaN	NaN	NaN	NaN	NaN
0.27	-73.142	290.8633	1087.2431	-1.5776	0.73877	0.076172	18.428	192.093	984.923	-1.3203	0.51709	-0.21289	112.322	234.071	563.508	-0.51318	0.26221	0.035156	NaN	NaN	NaN	NaN	NaN	NaN
0.272	-63.611	305.097	1115.394	-1.6226	0.75244	0.070801	27.874	188.653	940.958	-1.2809	0.49902	-0.20537	74.7244	169.548	514.751	-0.46875	0.23145	0.027832	NaN	NaN	NaN	NaN	NaN	NaN
0.274	-68.937	310.607	1149.004	-1.6655	0.76221	0.066406	35.575	152.828	937.7948	-1.2406	0.47969	-0.19131	25.582	201.4558	452.8324	-0.44922	0.22461	0.021484	NaN	NaN	NaN	NaN	NaN	NaN
0.276	-62.213	316.968	1168.634	-1.7129	0.77246	0.067383	12.694	219.827	898.09	-1.202	0.45664	-0.17842	49.263	158.086	402.7795	-0.40674	0.19971	0.020508	NaN	NaN	NaN	NaN	NaN	NaN
0.278	-75.843	317.348	1167.588	-1.7769	0.79004	0.057617	-9.455	156.9012	869.262	-1.1658	0.44356	-0.16514	54.656	200.907	361.1685	-0.36181	0.18286	0.019531	NaN	NaN	NaN	NaN	NaN	NaN
0.28	-70.983	307.159	1173.522	-1.8101	0.79639	0.057617	-7.577	173.637	842.099	-1.1289	0.41992	-0.15381	36.44	153.929	339.0718	-0.32471	0.16797	0.018066	NaN	NaN	NaN	NaN	NaN	NaN
0.282	-40.755	292.724	1170.8318	-1.8687	0.81104	0.059082	-1.737	202.801	788.309	-1.0904	0.40703	-0.13945	16.857	160.4864	325.105	-0.27295	0.15576	0.015137	NaN	NaN	NaN	NaN	NaN	NaN
0.284	-56.4	275.0636	1158.3604	-1.9043	0.81836	0.059814	6.149	148.24527	754.614	-1.0557	0.38838	-0.125	38.769	105.7806	285.4008	-0.24854	0.14648	0.010254	NaN	NaN	NaN	NaN	NaN	NaN
0.286	-50.954	268.015	1141.3055	-1.9272	0.82666	0.054688	-7.809	201.384	714.6722	-1.0186	0.38018	-0.11016	-7.819	134.62	268.7076	-0.18994	0.12793	0.01123	NaN	NaN	NaN	NaN	NaN	NaN
0.288	-64.97	252.954	1147.255	-1.9253	0.82861	0.056641	-24.235	198.434	673.4828	-0.98633	0.3666	-0.10205	-13.83	103.755	239.295	-0.15332	0.11548	0.0046387	NaN	NaN	NaN	NaN	NaN	NaN
0.29	-35.635	245.405	1130.068	-1.916	0.83105	0.054199	-6.898	183.0858	663.63049	-0.95166	0.3501	-0.087891	-30.546	133.086	251.946	-0.10742	0.10352	0.00097656	NaN	NaN	NaN	NaN	NaN	NaN
0.292	-50.021	223.977	1120.833	-1.8555	0.82764	0.041992	-13.214	245.62	624.842	-0.91436	0.34561	-0.072168	-34.153	111.486	236.254	-0.067383	0.086426	0	NaN	NaN	NaN	NaN	NaN	NaN
0.294	-52.434	208.6161	1096.181	-1.7881	0.82129	0.036377	-20.225	184.372	594.3368	-0.87676	0.33594	-0.064453	-47.007	130.82	205.904	-0.048828	0.083496	-0.0087891	NaN	NaN	NaN	NaN	NaN	NaN
0.296	-44.82	184.1237	1101.185	-1.7007	0.80713	0.032715	2.154	190.959	577.9	-0.84551	0.32187	-0.05	-51.224	95.425	167.4793	-0.0048828	0.058594	-0.015137	NaN	NaN	NaN	NaN	NaN	NaN
0.298	-55.742	192.8237	1100.993	-1.5786	0.78467	0.020508	-6.882	209.565	550.117	-0.80322	0.31758	-0.040137	-91.299	79.074	164.71	0.028809	0.046631	-0.020996	NaN	NaN	NaN	NaN	NaN	NaN
0.3	-34.295	197.0547	1085.0224	-1.5254	0.77148	0.0087891	14.743	147.397	543.627	-0.75928	0.30811	-0.032715	-92.5843	50.466	142.1165	0.061523	0.035645	-0.022461	NaN	NaN	NaN	NaN	NaN	NaN
0.302	-49.021	187.802	1079.697	-1.4116	0.74951	-0.0039063	28.425	177.701	519.035	-0.7211	0.30244	-0.024219	-81.8277	54.293	144.721	0.096191	0.027832	-0.039551	NaN	NaN	NaN	NaN	NaN	NaN
0.304	-37.2328	171.59	1076.738	-1.3311	0.73096	-0.018066	21.896	159.672	462.7665	-0.67646	0.29736	-0.011523	-42.057	48.069	102.8701	0.11719	0.022949	-0.034668	NaN	NaN	NaN	NaN	NaN	NaN
0.306	-56.846	170.421	1062.833	-1.2612	0.72412	-0.034668	22.862	128.208	462.6628	-0.63545	0.28955	-0.0080078	-46.651	35.30986	113.679	0.1416	0.00097656	-0.04248	NaN	NaN	NaN	NaN	NaN	NaN
0.308	-52.625	177.818	1046.7089	-1.1807	0.71875	-0.055176	25.947	168.328	427.867	-0.58906	0.28281	0.0016602	-3.813	41.819	99.291	0.16797	-0.0078125	-0.05957	NaN	NaN	NaN	NaN	NaN	NaN
0.31	-55.73	166.968	1046.5988	-1.1426	0.71094	-0.063477	29.261	108.901	400.077	-0.54199	0.27979	0.01123	-32.38	22.6542	99.853	0.17285	-0.0019531	-0.057617	NaN	NaN	NaN	NaN	NaN	NaN
0.312	-49.048	148.822	1050.9312	-1.0801	0.70313	-0.07959	22.384	117.7635	381.11	-0.50186	0.27432	0.014355	-19.675	60.295	58.8114	0.18652	-0.01709	-0.061035	NaN	NaN	NaN	NaN	NaN	NaN
0.314	-46.866	136.4703	1050.6955	-1.0393	0.69849	-0.090088	40.6019	129.189	348.69	-0.45576	0.27119	0.021582	-15.682	54.576	85.126	0.18897	-0.015381	-0.067871	NaN	NaN	NaN	NaN	NaN	NaN
0.316	-62.39	131.1063	1033.3247	-1.0117	0.69336	-0.094238	54.1057	70.0534	330.384	-0.41123	0.26612	0.023926	-0.265999999999998	83.36	70.696	0.18994	-0.01709	-0.069824	NaN	NaN	NaN	NaN	NaN	NaN
0.318	-41.485	119.8296	1036.943	-0.98828	0.67773	-0.11621	19.611	108.5	314.908	-0.36631	0.25801	0.02959	9.802	48.4143	100.074	0.18896	-0.029297	-0.068848	NaN	NaN	NaN	NaN	NaN	NaN
0.32	-53.8246	108.142	1032.234	-0.979	0.67725	-0.12451	22.509	99.395	270.356	-0.32227	0.25781	0.033203	37.722	62.069	58.391	0.18066	-0.025879	-0.071289	NaN	NaN	NaN	NaN	NaN	NaN
0.322	-28.4355	108.865	1006.719	-0.97217	0.67236	-0.13379	34.036	94.2949	240.08135	-0.2625	0.24512	0.036133	36.9521	30.7427	35.44	0.17041	-0.02832	-0.070313	NaN	NaN	NaN	NaN	NaN	NaN
0.324	-47.1916	96.591	989.872	-0.9663	0.67041	-0.1399	2.682	151.948	227.04	-0.20791	0.2375	0.041797	56.247	60.378	39.154	0.15893	-0.031006	-0.065674	NaN	NaN	NaN	NaN	NaN	NaN
0.326	-19.45	79.244	983.283	-0.96436	0.67236	-0.14502	15.767	106.2505	214.609	-0.14229	0.23477	0.042187	44.94	15.5073	40.97	0.14648	-0.03125	-0.064453	NaN	NaN	NaN	NaN	NaN	NaN
0.328	8.41	45.8489	987.976	-0.9585	0.67139	-0.1499	31.316	109.5	210.259	-0.078906	0.23213	0.041797	59.701	46.892	21.6244	0.13379	-0.03125	-0.05957	NaN	NaN	NaN	NaN	NaN	NaN
0.33	-1.474	37.957	963.099	-0.95508	0.67676	-0.16016	-6.155	101.964	178.015	-0.0068359	0.21973	0.04541	71.0537	-7.475	17.92224	0.12305	-0.027344	-0.061035	NaN	NaN	NaN	NaN	NaN	NaN
0.332	6.554	20.0613	946.8784	-0.93555	0.67773	-0.16895	-2.251	35.9598	181.231	0.056738	0.21397	0.047461	79.3856	23.7587	24.357	0.10596	-0.027832	-0.056641	NaN	NaN	NaN	NaN	NaN	NaN
0.334	8.84500000000001	3.148	935.136	-0.92139	0.68408	-0.17749	-3.379	67.341	160.249	0.12461	0.2083	0.049121	47.9736	-10.175	52.82	0.09375	-0.03418	-0.050781	NaN	NaN	NaN	NaN	NaN	NaN
0.336	31.508	-10.997	919.9633	-0.89648	0.68945	-0.18457	-12.701	36.9794	117.7736	0.18281	0.19775	0.053027	24.417	24.0492	46.97	0.080078	-0.035156	-0.041992	NaN	NaN	NaN	NaN	NaN	NaN
0.338	19.519	-20.169	915.407	-0.86475	0.69385	-0.20068	2.851	20.39	116.8538	0.23916	0.18555	0.057129	17.108	-13.2833	33.3719	0.063965	-0.038574	-0.035645	NaN	NaN	NaN	NaN	NaN	NaN
0.34	40.95	-44.221	920.348	-0.84912	0.70166	-0.19922	-27.241	65.2121	89.9825	0.28613	0.17725	0.048828	0.853999999999999	44.844	32.6578	0.056152	-0.035156	-0.035645	NaN	NaN	NaN	NaN	NaN	NaN
0.342	64.375	-69.624	936.615	-0.80908	0.70557	-0.21826	-19.274	21.1844	105.60259	0.3248	0.16729	0.06084	-1.938	10.844	51.52	0.047363	-0.039551	-0.031738	NaN	NaN	NaN	NaN	NaN	NaN
0.344	70.7018	-80.448	950.202	-0.79101	0.70801	-0.22827	-0.777000000000001	31.9621	120.51	0.35127	0.15742	0.063965	-19.213	55.265	51.543	0.040528	-0.037598	-0.031006	NaN	NaN	NaN	NaN	NaN	NaN
0.346	55.124	-91.8958	946.449	-0.77148	0.70898	-0.2417	-5.524	46.805	103.745	0.37158	0.15078	0.069824	-16.055	9.1053	44.005	0.037109	-0.041504	-0.030273	NaN	NaN	NaN	NaN	NaN	NaN
0.348	45.719	-106.324647	947.629	-0.75391	0.71484	-0.25195	-4.262	3.6355	111.258	0.3834	0.14482	0.074707	-47.702	42.62	30.895	0.037598	-0.046387	-0.038086	NaN	NaN	NaN	NaN	NaN	NaN
0.35	62.201	-120.87376	958.437	-0.75195	0.71484	-0.26074	7.637	51.895	93.844	0.38623	0.13379	0.087402	-69.7657	12.316	30.9785	0.041504	-0.045898	-0.038086	NaN	NaN	NaN	NaN	NaN	NaN
0.352	66.881	-110.723	941.226	-0.75732	0.72314	-0.26416	12.474	37.938	77.852	0.38564	0.13516	0.094629	-56.7196	32.0787	46.431	0.04248	-0.046875	-0.044434	NaN	NaN	NaN	NaN	NaN	NaN
0.354	71.432	-111.395	936.786	-0.77027	0.72632	-0.26709	15.594	23.67618	62.9341	0.37744	0.12832	0.10273	-43.547	3.073	22.312	0.049561	-0.051758	-0.046631	NaN	NaN	NaN	NaN	NaN	NaN
0.356	60.183	-131.4287	956.126	-0.79492	0.73047	-0.26758	5.022	57.736	32.249	0.3665	0.12207	0.11641	-47.675	21.1642	24.7478	0.054199	-0.049316	-0.055176	NaN	NaN	NaN	NaN	NaN	NaN
0.358	46.724	-135.5951	974.648	-0.83643	0.74072	-0.26953	9.46	17.7567	28.596	0.3416	0.12832	0.12481	-37.727	1.798	16.57847	0.050781	-0.043457	-0.062012	NaN	NaN	NaN	NaN	NaN	NaN
0.36	34.838	-138.8493	987.147	-0.8584	0.74609	-0.26904	33.413	46.076	41.8696	0.31787	0.12891	0.12988	-62.7705	12.241	36.244	0.050293	-0.044434	-0.063965	NaN	NaN	NaN	NaN	NaN	NaN
0.362	26.834	-136.3025	954.7315	-0.90918	0.75684	-0.26465	22.648	53.01	27.8836	0.29415	0.12129	0.14414	-46.74	15.311	31.7621	0.046875	-0.039551	-0.070801	NaN	NaN	NaN	NaN	NaN	NaN
0.364	41.923	-142.3486	966.951	-0.94776	0.76123	-0.2583	33.561	10.6239	47.313	0.2627	0.12315	0.15478	-30.63	17.336	32.016	0.046143	-0.031982	-0.075684	NaN	NaN	NaN	NaN	NaN	NaN
0.366	21.806	-144.4665	966.836	-0.9873	0.76563	-0.26123	12.161	43.656	38.066	0.23419	0.12041	0.16221	-12.301	13.305	34.742	0.037109	-0.023926	-0.08252	NaN	NaN	NaN	NaN	NaN	NaN
0.368	38.63	-135.25088	958.287	-1.0347	0.77002	-0.25146	29.849	16.6842	25.123	0.20186	0.12305	0.16943	-18.827	10.9818	79.461	0.036133	-0.0058594	-0.092773	NaN	NaN	NaN	NaN	NaN	NaN
0.37	13.083	-128.745	949.226	-1.0625	0.76953	-0.25195	60.934	-2.3043	36.8586	0.16846	0.11865	0.17822	37.251	19.3764	54.023	0.033691	0.003418	-0.096191	NaN	NaN	NaN	NaN	NaN	NaN
0.372	28.145	-134.02	960.903	-1.105	0.77783	-0.24463	10.885	30.0499	17.7482	0.13641	0.11856	0.1833	5.057	2.5193	50.018	0.032227	0.0097656	-0.10449	NaN	NaN	NaN	NaN	NaN	NaN
0.374	27.384	-146.838	981.826	-1.1375	0.78052	-0.24096	23.109	2.19954	36.1736	0.099684	0.11786	0.18117	31.237	29.5068	15.4079	0.032959	0.023926	-0.11328	NaN	NaN	NaN	NaN	NaN	NaN
0.376	26.925	-154.142	994.954	-1.1602	0.78223	-0.23877	28.174	24.721	58.18	0.065291	0.10458	0.18818	21.534	7.7913	11.6852	0.036133	0.033691	-0.11816	NaN	NaN	NaN	NaN	NaN	NaN
0.378	38.744	-159.5838	994.25	-1.1851	0.78662	-0.23779	14.097	40.5709	33.686	0.030735	0.10625	0.18984	59.001	55.124	17.1971	0.040039	0.049805	-0.12402	NaN	NaN	NaN	NaN	NaN	NaN
0.38	32.435	-152.8914	997.086	-1.197	0.78394	-0.23535	17.678	-2.6952	52.678	0.0024414	0.10547	0.18799	60.5242	16.59584	11.645	0.043457	0.054688	-0.12744	NaN	NaN	NaN	NaN	NaN	NaN
0.382	57.605	-149.7576	1011.12	-1.2012	0.78906	-0.23291	-12.88	28.6655	56.276	-0.020375	0.099043	0.18848	79.7166	49.677	-3.842	0.052246	0.067383	-0.12793	NaN	NaN	NaN	NaN	NaN	NaN
0.384	33.102	-139.7377	985.487	-1.2026	0.78955	-0.23584	-10.405	17.7632	23.5554	-0.039976	0.095633	0.18545	33.571	6.9694	41.36	0.060547	0.077637	-0.13331	NaN	NaN	NaN	NaN	NaN	NaN
0.386	50.993	-152.5609	990.82	-1.2007	0.7876	-0.23633	19.098	10.5332	22.071	-0.058329	0.090921	0.18738	39.706	41.989	43.082	0.072754	0.086914	-0.13477	NaN	NaN	NaN	NaN	NaN	NaN
0.388	55.484	-158.2583	1011.513	-1.1934	0.77344	-0.23291	13.413	53.133	18.3777	-0.067616	0.091141	0.18315	45.222	5.651	58.265	0.085449	0.10303	-0.13525	NaN	NaN	NaN	NaN	NaN	NaN
0.39	49.645	-149.3436	1022.965	-1.1866	0.78028	-0.24365	-17.441	7.9198	25.3598	-0.078125	0.087891	0.18311	21.683	47.972	38.245	0.091797	0.10645	-0.13428	NaN	NaN	NaN	NaN	NaN	NaN
0.392	57.483	-141.0662	1028.131	-1.1753	0.77393	-0.24072	-20.026	28.044	45.2491	-0.080971	0.086342	0.17579	14.014	10.2645	35.639	0.104	0.12256	-0.1333	NaN	NaN	NaN	NaN	NaN	NaN
0.394	59.259	-141.2248	1016.179	-1.1636	0.76221	-0.24512	-19.012	39.1325	31.627	-0.081817	0.087677	0.17834	3.375	56.346	27.9395	0.11402	0.12989	-0.13525	NaN	NaN	NaN	NaN	NaN	NaN
0.396	82.927	-139.6765	1004.4792	-1.1558	0.75928	-0.24365	-13.377	7.8834	53.309	-0.079042	0.090537	0.17409	-0.877000000000002	1.9493	41.946	0.11914	0.14209	-0.13184	NaN	NaN	NaN	NaN	NaN	NaN
0.398	71.596	-117.1475	991.0387	-1.1489	0.74658	-0.24854	-23.52	49.397	60.823	-0.070082	0.094456	0.1718	-27.633	44.4975	11.0157	0.12744	0.15283	-0.13525	NaN	NaN	NaN	NaN	NaN	NaN
0.4	83.035	-98.5447	978.1215	-1.1414	0.73853	-0.25171	-17.926	20.1023	48.8819	-0.051758	0.10059	0.16553	-31.27	-23.9487	33.726	0.13184	0.1582	-0.13721	NaN	NaN	NaN	NaN	NaN	NaN
0.402	92.144	-91.519	983.942	-1.1416	0.73047	-0.25244	8.891	3.4544	39.9316	-0.03605	0.10498	0.15873	-44.786	18.5762	45.34	0.13525	0.1709	-0.13818	NaN	NaN	NaN	NaN	NaN	NaN
0.404	95.175	-90.986	997.689	-1.145	0.72705	-0.25537	4.1	31.3414	15.5407	-0.020188	0.11548	0.15405	-28.146	-17.078	61.582	0.13013	0.17895	-0.14185	NaN	NaN	NaN	NaN	NaN	NaN
0.406	78.209	-102.31	991.5956	-1.1504	0.7207	-0.25635	11.742	-22.1572	40.1481	0.0055201	0.11649	0.14714	-29.372	34.678	72.446	0.12158	0.18945	-0.15137	NaN	NaN	NaN	NaN	NaN	NaN
0.408	43.106	-106.5513	995.3723	-1.1587	0.71143	-0.26172	-6.996	-9.5843	58.005	0.026461	0.11848	0.14651	-35.8888	-17.23	83.9989	0.091797	0.19971	-0.15527	NaN	NaN	NaN	NaN	NaN	NaN
0.41	61.783	-106.7879	990.8193	-1.1616	0.7063	-0.2622	3.078	16.406	40.709	0.048828	0.12451	0.14209	-68.589	8.982	83.736	0.069824	0.20264	-0.14844	NaN	NaN	NaN	NaN	NaN	NaN
0.412	56.702	-97.737	985.279	-1.1626	0.70361	-0.25928	34.558	-12.1482	42.668	0.069213	0.13287	0.13717	-55.095	-46.751	98.8204	0.01123	0.2085	-0.14746	NaN	NaN	NaN	NaN	NaN	NaN
0.414	62.93	-79.7538	970.0878	-1.1543	0.69531	-0.26563	23.334	30.0786	51.649	0.083472	0.1386	0.13158	-52.934	-26.421	112.6257	-0.03833	0.21509	-0.15088	NaN	NaN	NaN	NaN	NaN	NaN
0.416	26.05	-87.2261	945.1021	-1.1582	0.6875	-0.26953	10.368	11.98403	40.433	0.099401	0.14692	0.1278	-7.032	-62.22	142.954	-0.092285	0.21924	-0.15332	NaN	NaN	NaN	NaN	NaN	NaN
0.418	44.092	-95.1836	945.68	-1.1401	0.67725	-0.26465	26.601	1.91464	47.14	0.10821	0.1563	0.12638	8.499	-24.153	203.346	-0.1709	0.22949	-0.15234	NaN	NaN	NaN	NaN	NaN	NaN
0.42	52.458	-99.944	951.584	-1.1326	0.66919	-0.26367	39.666	45.8	18.3261	0.11963	0.17139	0.12402	30.505	-52.967	245.7632	-0.21094	0.24023	-0.15625	NaN	NaN	NaN	NaN	NaN	NaN
0.422	34.473	-95.235	947.3628	-1.1211	0.65723	-0.26758	32.068	9.18608	12.0151	0.12241	0.18086	0.11797	7.272	-33.7723	320.961	-0.30469	0.26318	-0.16357	NaN	NaN	NaN	NaN	NaN	NaN
0.424	24.972	-90.4452	946.376	-1.103	0.64697	-0.26172	32.173	16.969	47.781	0.12914	0.19164	0.11391	20.344	-33.8625	353.787	-0.38037	0.28369	-0.16455	NaN	NaN	NaN	NaN	NaN	NaN
0.426	28.442	-79.9212	921.0199	-1.0972	0.64014	-0.25928	-1.596	26.5256	29.4085	0.13245	0.19963	0.11681	-23.674	-0.65466	472.394	-0.46729	0.30713	-0.17432	NaN	NaN	NaN	NaN	NaN	NaN
0.428	40.687	-67.0877	906.204	-1.0781	0.63379	-0.25684	31.173	-13.33784	39.82346	0.13071	0.21147	0.11494	22.23	46.2121	555.4673	-0.60303	0.32666	-0.16846	NaN	NaN	NaN	NaN	NaN	NaN
0.43	13.24	-51.633	874.466	-1.0569	0.62476	-0.25049	29.518	18.0468	43.904	0.12256	0.22314	0.11572	-1.9394	77.2718	652.051	-0.67969	0.34375	-0.16797	NaN	NaN	NaN	NaN	NaN	NaN
0.432	11.123	-54.177	857.788	-1.0386	0.61963	-0.25098	0.606999999999999	-12.848	49.8473	0.11475	0.2366	0.11715	1.93541	119.535	729.29322	-0.85303	0.39307	-0.18018	NaN	NaN	NaN	NaN	NaN	NaN
0.434	12.624	-54.672	864.434	-1.0093	0.604	-0.24463	12.957	-33.9754	72.193	0.10792	0.24761	0.11627	-33.2433	85.824	838.353	-0.99584	0.41138	-0.17212	NaN	NaN	NaN	NaN	NaN	NaN
0.436	33.719	-52.289	859.019	-0.99951	0.59814	-0.23486	-1.025	2.21	55.955	0.10298	0.26197	0.11197	-34.372	83.975	926.60449	-1.1558	0.44189	-0.1626	NaN	NaN	NaN	NaN	NaN	NaN
0.438	23.508	-55.013	843.778	-0.97314	0.58643	-0.22803	3.314	-35.566	68.2591	0.093964	0.26889	0.11197	-31.739	22.2511	1046.911	-1.3999	0.46631	-0.12451	NaN	NaN	NaN	NaN	NaN	NaN
0.44	13.424	-50.2818	819.6068	-0.9519	0.57837	-0.21851	-9.42	-33.8121	109.8231	0.087891	0.27637	0.10889	-8.897	31.2236	1080.18	-1.5376	0.479	-0.1001	NaN	NaN	NaN	NaN	NaN	NaN
0.442	44.434	-47.539	811.191	-0.92969	0.57031	-0.21387	-33.7851	-20.65	133.3203	0.079192	0.29107	0.1084	-8.4926	-36.388	1123.971	-1.8496	0.52734	-0.054688	NaN	NaN	NaN	NaN	NaN	NaN
0.444	46.177	-36.284	793.0845	-0.90283	0.55908	-0.21143	-34.705	-50.3626	177.5024	0.061444	0.30208	0.10504	0.460000000000001	-46.795	1095.061	-2.1367	0.59863	-0.015625	NaN	NaN	NaN	NaN	NaN	NaN
0.446	53.363	-38.573	769.2828	-0.8916	0.55176	-0.20703	-45.4536	7.6707	230.1876	0.04075	0.3095	0.099216	1.175	-145.8217	1074.609	-2.291	0.62109	-0.00048828	NaN	NaN	NaN	NaN	NaN	NaN
0.448	44.023	-48.558	759.523	-0.85693	0.53955	-0.19678	-51.01	19.154	295.567	0.0079463	0.3166	0.097752	-15.714	-138.529	1004.6336	-2.48	0.69971	-0.0078125	NaN	NaN	NaN	NaN	NaN	NaN
0.45	61.696	-46.329	758.797	-0.83886	0.53467	-0.19043	-45.9692	28.2419	386.441	-0.030273	0.32861	0.095215	-48.2084	-191.686	995.929	-2.5489	0.75586	-0.0036621	NaN	NaN	NaN	NaN	NaN	NaN
0.452	66.259	-40.166	755.781	-0.81543	0.52588	-0.18359	-41.234	90.656	453.622	-0.071741	0.34247	0.098437	-65.451	-122.9706	962.45	-2.5229	0.8374	0.003418	NaN	NaN	NaN	NaN	NaN	NaN
0.454	49.057	-31.29	740.855	-0.79297	0.50977	-0.17578	-15.384	82.791	529.798	-0.11899	0.35076	0.097758	-85.874	-153.177	988.282	-2.3984	0.95703	0.023926	NaN	NaN	NaN	NaN	NaN	NaN
0.456	69.32	-35.6816	733.127	-0.77148	0.51172	-0.17285	-0.375	111.201	652.0318	-0.17212	0.36796	0.094631	-107.409	-74.815	968.487	-2.3022	1.0063	0.043945	NaN	NaN	NaN	NaN	NaN	NaN
0.458	58.275	-19.9266	696.834	-0.74463	0.50537	-0.16162	-10.341	141.373	752.2489	-0.23512	0.38085	0.093848	-114.744	-87.271	972.352	-2.0728	1.0581	0.027344	NaN	NaN	NaN	NaN	NaN	NaN
0.46	60.979	-15.2525	681.8387	-0.71973	0.49609	-0.15991	9.651	88.391	890.0959	-0.31348	0.39307	0.089844	-140.342	-3.31	969.2031	-1.8194	1.0108	0.017334	NaN	NaN	NaN	NaN	NaN	NaN
0.462	35.159	-12.5914	663.542	-0.69873	0.48486	-0.15234	21.345	91.628	970.064	-0.41955	0.40108	0.091894	-112.512	-34.24	985.986	-1.5488	0.92578	0.0043945	NaN	NaN	NaN	NaN	NaN	NaN
0.464	62.195	-16.127	649.09	-0.66553	0.47607	-0.14648	27.499	34.715	1019.93	-0.54506	0.41553	0.098442	-121.991	8.739	972.558	-1.271	0.79443	-0.058594	NaN	NaN	NaN	NaN	NaN	NaN
0.466	51.348	-17.777	653.913	-0.65723	0.4668	-0.13916	30.308	-32.454	1086.361	-0.68802	0.42764	0.11446	-73.961	-63.529	997.427	-1.1558	0.729	-0.074707	NaN	NaN	NaN	NaN	NaN	NaN
0.468	48.409	-13.923	636.287	-0.62256	0.45752	-0.13428	26.9	-44.768	1095.289	-0.85891	0.44581	0.12295	-53.932	-73.368	1030.708	-0.95752	0.67822	-0.062012	NaN	NaN	NaN	NaN	NaN	NaN
0.47	39.626	-20.3972	613.933	-0.60107	0.44824	-0.13135	73.3095	-133.941	1088.303	-1.0547	0.46191	0.13135	19.058	-172.038	1079.267	-0.87866	0.72193	-0.042725	NaN	NaN	NaN	NaN	NaN	NaN
0.472	47.646	-2.57	593.074	-0.58398	0.4375	-0.12451	108.9761	-160.665	1092.143	-1.2707	0.48935	0.14121	-6.469	-203.826	1106.737	-0.93506	0.82178	-0.078613	NaN	NaN	NaN	NaN	NaN	NaN
0.474	37.158	3.0651	587.801	-0.5542	0.43018	-0.11914	111.66153	-166.385	1065.742	-1.5	0.52265	0.14815	3.865	-274.1871	1121.89	-1.0703	0.9375	-0.1377	NaN	NaN	NaN	NaN	NaN	NaN
0.476	11.325	10.9605	571.1871	-0.53857	0.42236	-0.11572	104.5615	-213.583	1074.558	-1.7265	0.56484	0.14775	-22.829	-293.229	1166.7776	-1.0981	0.96826	-0.15186	NaN	NaN	NaN	NaN	NaN	NaN
0.478	29.432	-17.2357	565.552	-0.50439	0.40771	-0.11133	121.793	-165.557	1057.662	-1.9346	0.61191	0.14189	23.055	-311.361	1218.0579	-1.1367	0.95508	-0.15625	NaN	NaN	NaN	NaN	NaN	NaN
0.48	18.376	-19.3284	551.486	-0.48584	0.39942	-0.10449	119.361	-128.49	996.733	-2.1011	0.6626	0.13916	23.005	-297.743	1292.122	-1.1818	0.93677	-0.14893	NaN	NaN	NaN	NaN	NaN	NaN
0.482	33.675	-12.328	545.657	-0.4624	0.39502	-0.10156	123.049	-101.889	1002.199	-2.1973	0.71016	0.12539	71.3401	-285.054	1356.597	-1.2573	0.9126	-0.1333	NaN	NaN	NaN	NaN	NaN	NaN
0.484	8.436	-11.607	537.798	-0.43701	0.38037	-0.094238	117.257	-35.7326	997.527	-2.2226	0.76025	0.10264	15.72	-273.926	1418.531	-1.4175	0.93604	-0.12939	NaN	NaN	NaN	NaN	NaN	NaN
0.486	25.709	-17.4037	524.107	-0.41748	0.37793	-0.094238	112.322	-34.862	979.841	-2.1679	0.80791	0.07959	10.6	-237.897	1450.5484	-1.4941	0.95508	-0.12842	NaN	NaN	NaN	NaN	NaN	NaN
0.488	32.827	-13.8394	518.61	-0.38916	0.36572	-0.086426	115.395	-3.57899999999999	991.751	-2.0265	0.88086	0.058985	25.274	-207.61	1502.939	-1.606	0.99072	-0.11865	NaN	NaN	NaN	NaN	NaN	NaN
0.49	19.049	-2.7592	479.4616	-0.37011	0.35253	-0.088135	95.88861	25.17	967.729	-1.8379	0.92969	0.063477	90.3248	-118.855	1506.772	-1.6902	1.012	-0.12378	NaN	NaN	NaN	NaN	NaN	NaN
0.492	22.619	-1.26257	469.476	-0.35156	0.34863	-0.080566	49.9816	-39.593	977.4495	-1.612	0.92939	0.034961	80.2222	-108.039	1549.435	-1.7729	1.0259	-0.12842	NaN	NaN	NaN	NaN	NaN	NaN
0.494	15.129	-0.799799999999999	460.41	-0.3252	0.33398	-0.072266	33.128	-65.538	988.8064	-1.3848	0.87969	0.014453	99.115	-64.444	1495.391	-1.8706	1.0591	-0.14014	NaN	NaN	NaN	NaN	NaN	NaN
0.496	49.095	8.4735	454.144	-0.31445	0.3291	-0.069824	43.87641	-105.558	961.655	-1.1688	0.79102	-0.0082026	62.824	-120.612	1502.787	-1.9219	1.0664	-0.14063	NaN	NaN	NaN	NaN	NaN	NaN
0.498	39.152	10.1733	437.054	-0.2915	0.31787	-0.067871	6.48	-197.063	994.964	-0.97052	0.70528	-0.042481	37.338	-70.628	1477.354	-1.9839	1.0649	-0.15771	NaN	NaN	NaN	NaN	NaN	NaN
0.5	36.872	7.3914	419.674	-0.27246	0.30737	-0.059815	-28.013	-209.468	1026.2203	-0.80273	0.62598	-0.064453	6.149	-108.254	1549.867	-2.0137	1.0508	-0.17627	NaN	NaN	NaN	NaN	NaN	NaN
0.502	49.655	4.6628	418.698	-0.25732	0.29736	-0.054688	-57.6283	-272.578	1040.345	-0.68262	0.57637	-0.077441	-20.801	-69.021	1573.503	-2.021	1.0493	-0.19482	NaN	NaN	NaN	NaN	NaN	NaN
0.504	49.253	8.3107	411.635	-0.23438	0.28711	-0.050293	-51.5192	-315.442	1116.257	-0.61836	0.57226	-0.09209	-29.01336	-128.511	1623.119	-2.0176	1.0332	-0.22656	NaN	NaN	NaN	NaN	NaN	NaN
0.506	50.404	11.7589	391.5196	-0.22217	0.28174	-0.04834	-72.31	-275.984	1133.959	-0.625	0.64766	-0.10342	-22.389	-100.043	1627.325	-2.0093	1.0337	-0.2417	NaN	NaN	NaN	NaN	NaN	NaN
0.508	28.464	12.1739	390.00575	-0.20752	0.26514	-0.042969	-102.996	-293.163	1171.27	-0.667	0.71817	-0.1169	-75.663	-146.404	1678.356	-1.9961	1	-0.2583	NaN	NaN	NaN	NaN	NaN	NaN
0.51	69.5688	5.2039	382.499	-0.19581	0.25634	-0.035644	-91.871	-231.16	1219.098	-0.68555	0.74805	-0.13232	-93.9581	-82.728	1677.701	-1.9756	0.9834	-0.27222	NaN	NaN	NaN	NaN	NaN	NaN
0.512	40.654	11.6161	360.669	-0.18652	0.25	-0.030762	-72.635	-137.074	1204.3113	-0.67686	0.71377	-0.11787	-75.558	-114.0706	1736.663	-1.9668	0.96387	-0.28271	NaN	NaN	NaN	NaN	NaN	NaN
0.514	43.917	21.5611	348.902	-0.17773	0.24023	-0.037598	-83.904	-129.2744	1243.647	-0.71865	0.67784	-0.10156	-65.2324	-59.775	1729.082	-1.9546	0.93408	-0.3042	NaN	NaN	NaN	NaN	NaN	NaN
0.516	49.3	5.3601	336.0274	-0.16944	0.23389	-0.023926	-76.897	-62.657	1236.334	-0.82295	0.66963	-0.091016	-24.1219	-119.572	1756.401	-1.9473	0.9209	-0.3125	NaN	NaN	NaN	NaN	NaN	NaN
0.518	40.537	-3.8991	353.312	-0.16016	0.22803	-0.019531	-69.58	-68.991	1218.594	-0.95205	0.68467	-0.079199	-48.29	-77.0379	1727.869	-1.9214	0.89893	-0.32178	NaN	NaN	NaN	NaN	NaN	NaN
0.52	36.86	2.0482	355.229	-0.15381	0.22412	-0.012207	-42.0388	-99.16	1289.43	-1.0762	0.71973	-0.074219	-33.86	-93.297	1716.448	-1.9079	0.87671	-0.33008	NaN	NaN	NaN	NaN	NaN	NaN
0.522	24.255	11.2311	342.459	-0.14697	0.22021	-0.012207	-28.023	-58.135	1279.532	-1.1863	0.75	-0.071094	-54.757	-21.642	1673.1525	-1.8984	0.86035	-0.33252	NaN	NaN	NaN	NaN	NaN	NaN
0.524	35.905	-2.5999	342.58	-0.13623	0.21143	-0.010254	-48.839	-107.157	1282.203	-1.278	0.779	-0.076465	-48.183	-16.358	1666.1374	-1.8809	0.83594	-0.32422	NaN	NaN	NaN	NaN	NaN	NaN
0.526	24.715	2.4046	326.5952	-0.13574	0.20776	-0.0031739	-25.5649	-94.066	1302.582	-1.3656	0.79619	-0.078809	-76.042	36.26	1648.347	-1.8901	0.81396	-0.32715	NaN	NaN	NaN	NaN	NaN	NaN
0.528	11.425	16.5133	309.4683	-0.1333	0.2041	-0.0014648	-13.247	-55.674	1291.532	-1.4412	0.81484	-0.078613	-44.5233	9.3493	1661.2066	-1.9102	0.79688	-0.31494	NaN	NaN	NaN	NaN	NaN	NaN
0.53	-6.83499999999999	24.63593	302.0032	-0.12939	0.1958	0	-14.598	-121.872	1340.708	-1.5132	0.83057	-0.075684	-24.755	45.904	1692.074	-1.947	0.78736	-0.31543	NaN	NaN	NaN	NaN	NaN	NaN
0.532	-2.111	12.8561	301.159	-0.12842	0.19434	0.0014648	11.69	-120.5645	1380.358	-1.5713	0.84531	-0.066894	24.129	30.9733	1693.2784	-1.9897	0.77393	-0.30371	NaN	NaN	NaN	NaN	NaN	NaN
0.534	4.398	10.0835	305.029	-0.12451	0.18652	0.0063477	20.039	-144.167	1412.149	-1.6347	0.85947	-0.059473	9.277	67.158	1680.6901	-2.0347	0.76221	-0.28174	NaN	NaN	NaN	NaN	NaN	NaN
0.536	-8.451	15.1002	307.053	-0.12476	0.18384	0.0078125	38.6769	-193.062	1508.212	-1.7042	0.87041	-0.057129	30.442	61.42962	1662.0668	-2.0522	0.75928	-0.27393	NaN	NaN	NaN	NaN	NaN	NaN
0.538	6.886	13.3052	310.267	-0.12256	0.18311	0.0092773	54.112	-138.282	1518.107	-1.7639	0.87324	-0.053614	27.615	75.673	1642.9508	-2.1055	0.77734	-0.27246	NaN	NaN	NaN	NaN	NaN	NaN
0.54	3.737	19.449	306.954	-0.12598	0.17773	0.0097656	50.685	-164.652	1509.472	-1.8281	0.88867	-0.050781	91.7146	48.237	1636.9002	-2.1192	0.78101	-0.25073	NaN	NaN	NaN	NaN	NaN	NaN
0.542	4.137	34.126	300.3485	-0.11768	0.17578	0.0097656	75.484	-130.4888	1527.015	-1.8854	0.90107	-0.051074	94.632	30.1654	1668.852	-2.1245	0.80225	-0.24854	NaN	NaN	NaN	NaN	NaN	NaN
0.544	-11.437	39.729	289.983375	-0.12305	0.17139	0.014648	58.1707	-49.89	1466.403	-1.9344	0.90898	-0.049317	109.884	10.0459	1671.556	-2.1226	0.80029	-0.26758	NaN	NaN	NaN	NaN	NaN	NaN
0.546	0.106000000000002	34.504	303.739	-0.125	0.17261	0.018799	23.84	-66.328	1479.2185	-1.9734	0.91836	-0.04502	70.214	-8.1084	1700.499	-2.1108	0.7876	-0.27051	NaN	NaN	NaN	NaN	NaN	NaN
0.548	12.411	34.014	313.683	-0.12695	0.16846	0.016602	43.645	-17.974	1496.832	-2.0065	0.92949	-0.048633	52.4	12.128	1633.9212	-2.0972	0.76807	-0.27979	NaN	NaN	NaN	NaN	NaN	NaN
0.55	25.743	30.5533	317.766	-0.13428	0.1665	0.022461	1.462	-19.064	1489.387	-2.0273	0.93066	-0.041504	43.401	16.881	1604.4512	-2.0816	0.76855	-0.28076	NaN	NaN	NaN	NaN	NaN	NaN
0.552	22.949	25.2906	305.699	-0.13477	0.16504	0.023438	-17.9766	-64.005	1535.279	-2.0353	0.92871	-0.037891	49.792	61.299	1541.603	-2.0601	0.77002	-0.28564	NaN	NaN	NaN	NaN	NaN	NaN
0.554	-2.424	28.613	312.791	-0.146	0.16504	0.025391	-8.2128	-17.575	1529.803	-2.0428	0.92852	-0.033789	55.297	72.195	1550.764	-2.0098	0.78516	-0.29883	NaN	NaN	NaN	NaN	NaN	NaN
0.556	29.907	29.722	321.76	-0.15333	0.16479	0.028565	-39.551	-32.4488	1503.449	-2.0459	0.92304	-0.027539	42.684	123.7233	1528.469	-1.98	0.77783	-0.29736	NaN	NaN	NaN	NaN	NaN	NaN
0.558	15.758	43.269	313.5707	-0.15771	0.16406	0.032715	-32.619	-2.348	1503.1785	-2.0413	0.91455	-0.017774	15.802	120.19	1536.23	-1.9077	0.77246	-0.3042	NaN	NaN	NaN	NaN	NaN	NaN
0.56	32.616	34.726	320.9542	-0.18066	0.16943	0.038574	-42.625	66.199	1465.6027	-2.0347	0.90479	-0.0097656	-5.408	163.986	1508.344	-1.8621	0.75903	-0.3103	NaN	NaN	NaN	NaN	NaN	NaN
0.562	27.932	23.8141	318.117	-0.18408	0.16699	0.041504	-74.7214	8.887	1482.485	-2.0242	0.89414	0.0076173	7.414	139.354	1502.57	-1.8159	0.7417	-0.31299	NaN	NaN	NaN	NaN	NaN	NaN
0.564	43.907	25.332	329.684	-0.20605	0.1709	0.045898	-31.961	18.977	1545.082	-2.0008	0.88828	0.03418	0.509	185.117	1454.2081	-1.7573	0.71338	-0.31055	NaN	NaN	NaN	NaN	NaN	NaN
0.566	27.95	33.478	335.503	-0.22265	0.17041	0.043945	-34.5528	-21.121	1566.29	-1.984	0.86445	0.040039	7.30800000000001	171.528	1434.96	-1.7222	0.70947	-0.30469	NaN	NaN	NaN	NaN	NaN	NaN
0.568	26.884	40.089	333.911	-0.23975	0.17236	0.054199	-60.493	-106.119	1603.225	-1.9655	0.8502	0.05293	-19.511	232.015	1393.229	-1.6636	0.68604	-0.30615	NaN	NaN	NaN	NaN	NaN	NaN
0.57	31.331	31.749	346.086	-0.25928	0.1748	0.05957	-31.172	-62.32437	1595.568	-1.9375	0.82813	0.069336	-37.891	195.632	1383.668	-1.6287	0.67261	-0.30054	NaN	NaN	NaN	NaN	NaN	NaN
0.572	27.181	35.331	352.921	-0.27197	0.17676	0.061035	-44.9751	-83.076	1563.934	-1.9375	0.79668	0.088574	-59.8505	225.65	1347.8824	-1.5933	0.65479	-0.28955	NaN	NaN	NaN	NaN	NaN	NaN
0.574	17.132	36.768	359.767	-0.2959	0.18262	0.066406	-20.959	-52.079	1538.467	-1.9428	0.78857	0.11709	-50.466	151.8883	1353.937	-1.5483	0.63721	-0.27588	NaN	NaN	NaN	NaN	NaN	NaN
0.576	-1.437	41.993	360.463	-0.31445	0.18701	0.075195	-18.088	21.6943	1466.6241	-1.9542	0.81084	0.14678	-66.071	179.6982	1323.391	-1.5273	0.62305	-0.26953	NaN	NaN	NaN	NaN	NaN	NaN
0.578	19.037	42.479	372.508	-0.33057	0.19482	0.075195	-55.775	-18.604	1457.0346	-1.9813	0.83818	0.14463	-53.469	150.099	1305.353	-1.4785	0.60156	-0.25586	NaN	NaN	NaN	NaN	NaN	NaN
0.58	9.801	47.097	379.604	-0.35254	0.19482	0.080566	2.866	36.9811	1490.625	-1.9766	0.84668	0.11719	-56.43	227.19472	1271.731	-1.4551	0.5791	-0.24316	NaN	NaN	NaN	NaN	NaN	NaN
0.582	-7.02	58.129	369.432	-0.35938	0.19922	0.08252	-13.5664	44.35567	1485.191	-1.9082	0.82226	0.11777	-23.054	220.0196	1229.882	-1.418	0.55566	-0.24023	NaN	NaN	NaN	NaN	NaN	NaN
0.584	6.876	41.36	385.345	-0.37793	0.20215	0.081055	-4.421	24.471	1512.671	-1.8715	0.79687	0.12998	-11.761	277.714	1190.89698	-1.3711	0.52148	-0.21484	NaN	NaN	NaN	NaN	NaN	NaN
0.586	-5.219	38.4937	399.636	-0.38819	0.20776	0.086426	42.9065	93.321	1489.808	-1.8891	0.79805	0.13466	16.153	241.655	1170.96	-1.3298	0.50269	-0.20825	NaN	NaN	NaN	NaN	NaN	NaN
0.588	5.562	37.683	431.256	-0.39844	0.20996	0.086426	23.625	74.138	1458.231	-1.9142	0.82041	0.14814	17.749	277.965	1135.768	-1.2915	0.48193	-0.19385	NaN	NaN	NaN	NaN	NaN	NaN
0.59	-23.083	48.38	430.601	-0.39941	0.21729	0.080566	49.182	91.374	1454.294	-1.9136	0.84619	0.14844	51.349	261.624	1140.36	-1.2534	0.45557	-0.1875	NaN	NaN	NaN	NaN	NaN	NaN
0.592	3.52	48.4971	434.588	-0.41016	0.21973	0.084961	58.7137	148.2	1399.533	-1.8806	0.85996	0.14951	55.831	310.238	1089.303	-1.2349	0.44287	-0.17676	NaN	NaN	NaN	NaN	NaN	NaN
0.594	-11.585	47.8978	445.113	-0.41992	0.2207	0.078613	27.527	79.5669	1392.481	-1.8313	0.85723	0.15508	53.6075	282.851	1044.439	-1.1914	0.41943	-0.15283	NaN	NaN	NaN	NaN	NaN	NaN
0.596	4.086	55.938	445.661	-0.42261	0.2268	0.075195	54.6407	95.719	1425.735	-1.7844	0.84473	0.15586	26.089	296.288	1015.565	-1.156	0.41211	-0.14307	NaN	NaN	NaN	NaN	NaN	NaN
0.598	0.658000000000001	51.527	456.195	-0.43652	0.23047	0.073242	36.28283	70.3	1403.74	-1.754	0.84131	0.15459	20.363	255.7568	944.279	-1.1245	0.39893	-0.13281	NaN	NaN	NaN	NaN	NaN	NaN
0.6	-0.981000000000002	51.603	467.002	-0.44922	0.24268	0.066406	23.739	7.974	1404.04	-1.73	0.83252	0.15381	24.352	264.15245	913.0393	-1.084	0.38477	-0.11328	NaN	NaN	NaN	NaN	NaN	NaN
0.602	27.812	48.744	481.879	-0.46045	0.24463	0.061523	42.7119	58.127	1368.662	-1.7022	0.82822	0.16162	31.431	246.918	868.037	-1.0625	0.37598	-0.10547	NaN	NaN	NaN	NaN	NaN	NaN
0.604	11.993	47.779	508.975	-0.47803	0.25879	0.056152	-0.298999999999999	38.382	1331.7502	-1.6772	0.82822	0.15782	18.206	271.9627	843.761	-1.0073	0.36182	-0.083496	NaN	NaN	NaN	NaN	NaN	NaN
0.606	24.189	41.9161	527.219	-0.49244	0.26416	0.053955	8.255	57.722	1342.974	-1.6585	0.82979	0.1625	29.325	262.608	819.064	-0.9668	0.36132	-0.074463	NaN	NaN	NaN	NaN	NaN	NaN
0.608	16.378	38.8883	531.001	-0.51172	0.27539	0.049805	30.686	128.671	1284.6702	-1.635	0.82012	0.16533	1.962	250.336	798.574	-0.91553	0.36279	-0.052246	NaN	NaN	NaN	NaN	NaN	NaN
0.61	52.9141	46.37	529.7004	-0.53613	0.29004	0.047852	0.748000000000001	99.4759	1285.458	-1.6138	0.81104	0.16748	-9.419	221.491	746.3244	-0.84863	0.34912	-0.046387	NaN	NaN	NaN	NaN	NaN	NaN
0.612	24.894	55.3361	532.5493	-0.55176	0.29443	0.04834	14.132	171.888	1296.296	-1.5963	0.8002	0.16338	-7.612	213.05	737.144	-0.8125	0.33887	-0.039551	NaN	NaN	NaN	NaN	NaN	NaN
0.614	18.202	61.049	552.014	-0.57031	0.31201	0.036621	0.614000000000001	182.966	1270.641	-1.5787	0.78555	0.16289	-16.751	222.073	686.004	-0.74707	0.3335	-0.027344	NaN	NaN	NaN	NaN	NaN	NaN
0.616	43.908	50.3125	568.198	-0.58935	0.31884	0.035645	-31.518	168.499	1259.689	-1.5568	0.7707	0.16445	-18.449	231.401	664.363	-0.69141	0.33081	-0.020997	NaN	NaN	NaN	NaN	NaN	NaN
0.618	51.39	46.2564	572.771	-0.60596	0.33252	0.036621	-10.357	229.821	1199.218	-1.533	0.7543	0.16289	-25.778	257.175	585.871	-0.64258	0.32227	-0.0092773	NaN	NaN	NaN	NaN	NaN	NaN
0.62	44.657	51.5787	584.8423	-0.62646	0.34619	0.032227	-39.6896	179.091	1170.6455	-1.5078	0.74365	0.16406	-51.8583	223.211	531.473	-0.56934	0.3125	0.0063477	NaN	NaN	NaN	NaN	NaN	NaN
0.622	22.563	49.7995	611.444	-0.63721	0.35205	0.03125	-25.878	164.632	1169.393	-1.4847	0.73047	0.16319	-78.8396	218.322	485.084	-0.53516	0.30811	0.012695	NaN	NaN	NaN	NaN	NaN	NaN
0.624	51.999	59.5399	631.585	-0.65088	0.36621	0.028809	-7.111	189.848	1109.126	-1.4578	0.71797	0.16553	-50.177	172.747	464.97	-0.4624	0.30322	0.024902	NaN	NaN	NaN	NaN	NaN	NaN
0.626	52.246	69.592	631.364	-0.66773	0.37378	0.026123	-30.112	138.37	1082.1116	-1.4336	0.70703	0.16709	-64.3369	194.354	410.7059	-0.41895	0.28736	0.037598	NaN	NaN	NaN	NaN	NaN	NaN
0.628	20.98	81.536	627.90614	-0.67773	0.38281	0.025391	9.081	173.724	1082.047	-1.4074	0.69199	0.16514	-59.8312	181.9646	385.302	-0.37256	0.28369	0.04834	NaN	NaN	NaN	NaN	NaN	NaN
0.63	36.284	70.584	640.1949	-0.69775	0.39307	0.025391	-17.198	167.755	1068.466	-1.3848	0.67773	0.16357	-58.0938	204.286	330.2032	-0.30078	0.26855	0.057617	NaN	NaN	NaN	NaN	NaN	NaN
0.632	20.841	73.7492	657.141	-0.70313	0.40039	0.024902	-9.69799999999999	143.6186	1061.331	-1.355	0.66104	0.15976	-69.7374	148.5964	316.996	-0.26416	0.25977	0.067871	NaN	NaN	NaN	NaN	NaN	NaN
0.634	37.601	91.679	663.598	-0.72266	0.41406	0.022949	40.933	195.502	1040.642	-1.3258	0.64258	0.1544	-51.37	181.279	270.5241	-0.1875	0.24805	0.081055	NaN	NaN	NaN	NaN	NaN	NaN
0.636	17.285	93.824	663.5162	-0.73926	0.42554	0.022461	13.177	156.7042	1012.328	-1.298	0.62383	0.15322	-20.45	143.1	250.5255	-0.12231	0.2417	0.084717	NaN	NaN	NaN	NaN	NaN	NaN
0.638	19.848	83.2458	691.134	-0.75342	0.43994	0.023926	40.954	152.4446	1019.055	-1.2624	0.60693	0.14971	-25.839	186.042	246.9	-0.059082	0.23242	0.086914	NaN	NaN	NaN	NaN	NaN	NaN
0.64	8.999	84.737	712.847	-0.77393	0.45361	0.021973	58.8578	185.836	957.502	-1.228	0.58838	0.14893	30.098	135.797	252.856	0.02002	0.22412	0.088867	NaN	NaN	NaN	NaN	NaN	NaN
0.642	26.992	94.771	720.002	-0.7832	0.45898	0.019043	35.342	156.842	906.809	-1.191	0.56778	0.14033	19.079	172.841	215.101	0.057617	0.21631	0.088379	NaN	NaN	NaN	NaN	NaN	NaN
0.644	7.874	89.588	724.873	-0.80176	0.48242	0.016113	69.385	208.809	870.403	-1.1489	0.54785	0.13936	31.203	93.4542	204.841	0.12256	0.19531	0.091797	NaN	NaN	NaN	NaN	NaN	NaN
0.646	11.711	97.944	727.7858	-0.8208	0.49804	0.012451	55.0281	201.6211	829.4946	-1.1211	0.52559	0.13584	38.151	111.1416	178.0332	0.18262	0.18457	0.099608	NaN	NaN	NaN	NaN	NaN	NaN
0.648	26.789	102.006	742.0537	-0.83203	0.5166	0.010742	39.437	171.3602	819.0539	-1.0807	0.51113	0.12773	46.536	43.782	157.1216	0.22021	0.16846	0.10156	NaN	NaN	NaN	NaN	NaN	NaN
0.65	17.79	116.534	740.8289	-0.85498	0.5415	0.010254	69.2035	219.815	767.8478	-1.0425	0.49463	0.11816	22	69.7442	167.556	0.25684	0.14893	0.11133	NaN	NaN	NaN	NaN	NaN	NaN
0.652	30.209	103.2125	752.105	-0.8667	0.55615	0.0048828	48.52697	167.41	725.4807	-1.0052	0.479	0.11572	37.942	34.062	136.105	0.271	0.13477	0.1084	NaN	NaN	NaN	NaN	NaN	NaN
0.654	23.354	115.224	768.466	-0.88867	0.57617	0.0058594	55.7096	162.9693	723.07	-0.9663	0.46582	0.1086	37.469	73.3078	115.385	0.30469	0.12744	0.11426	NaN	NaN	NaN	NaN	NaN	NaN
0.656	43.386	107.306	791.007	-0.90869	0.60596	0.0053711	44.5513	184.753	666.819	-0.93194	0.44629	0.10313	39.604	32.11601	122.787	0.31787	0.11181	0.1189	NaN	NaN	NaN	NaN	NaN	NaN
0.658	26.559	118.946	804.419	-0.91602	0.61914	0.0043945	32.241	135.9022	636.739	-0.89961	0.43203	0.096289	46.073	57.706	103.621	0.31543	0.10205	0.12793	NaN	NaN	NaN	NaN	NaN	NaN
0.66	38.036	125.59	806.27	-0.92578	0.63818	-0.0024414	53.608	182.253	592.327	-0.86035	0.41895	0.089844	52.334	25.294	87.4517	0.32129	0.098633	0.12402	NaN	NaN	NaN	NaN	NaN	NaN
0.662	44.287	129.904	814.491	-0.93018	0.65747	-0.0039063	2.624	171.313	556.278	-0.82715	0.39941	0.087207	16.267	67.25	68.5686	0.31006	0.088379	0.13281	NaN	NaN	NaN	NaN	NaN	NaN
0.664	57.996	138.979	818.389	-0.92871	0.68164	-0.011719	-11.737	141.3491	567.5859	-0.78857	0.38916	0.079004	30.331	58.308	69.12539	0.29443	0.077148	0.14648	NaN	NaN	NaN	NaN	NaN	NaN
0.666	55.222	138.986	819.771	-0.92578	0.70117	-0.0039063	9.211	182.036	530.9934	-0.74873	0.38135	0.075098	11.789	82.753	83.035	0.2749	0.065918	0.15357	NaN	NaN	NaN	NaN	NaN	NaN
0.668	43.226	148.522	820.847	-0.92725	0.71143	-0.014648	-27.451	141.0024	501.153	-0.70801	0.36787	0.065234	15.65	34.7046	58.146	0.25635	0.060059	0.15332	NaN	NaN	NaN	NaN	NaN	NaN
0.67	64.494	151.074	841.952	-0.92285	0.72949	-0.017578	-19.339	137.6506	494.375	-0.66992	0.35352	0.060547	-20.654	32.9968	45.493	0.22705	0.052246	0.16748	NaN	NaN	NaN	NaN	NaN	NaN
0.672	59.546	151.479	847.448	-0.91577	0.73853	-0.023194	-28.7	145.78	439.92	-0.63731	0.33652	0.052734	-55.53	13.7431	21.1492	0.21289	0.046387	0.16992	NaN	NaN	NaN	NaN	NaN	NaN
0.674	47.216	160.271	865.673	-0.9082	0.75	-0.025879	-61.945	103.474	420.655	-0.60274	0.32637	0.049707	-62.928	15.378	23.2884	0.18359	0.039063	0.18213	NaN	NaN	NaN	NaN	NaN	NaN
0.676	59.249	154.643	872.33	-0.90234	0.76367	-0.029297	-15.115	131.88	380.667	-0.57539	0.31465	0.042676	-44.642	21.1128	14.3757	0.16162	0.036377	0.18872	NaN	NaN	NaN	NaN	NaN	NaN
0.678	60.536	159.3319	873.471	-0.89746	0.77344	-0.031738	-32.2388	115.386	328.5683	-0.54854	0.30254	0.037793	-54.8582	7.3218	22.8748	0.14404	0.03125	0.19482	NaN	NaN	NaN	NaN	NaN	NaN
0.68	58.317	173.8	863.1372	-0.89063	0.77734	-0.038574	-48.1379	81.6205	328.9214	-0.52148	0.29297	0.031738	-47.7186	2.92422	14.2207	0.11816	0.030273	0.2085	NaN	NaN	NaN	NaN	NaN	NaN
0.682	30.38	183.906	859.9612	-0.88452	0.78833	-0.045654	-15.797	130.624	292.37873	-0.48388	0.28115	0.030957	-31.734	-22.28787	36.288	0.10986	0.025391	0.20898	NaN	NaN	NaN	NaN	NaN	NaN
0.684	46.624	173.961	879.377	-0.88623	0.79541	-0.04834	-29.191	98.9647	272.2585	-0.44443	0.27354	0.030957	-35.703	-9.312	28.9296	0.087402	0.018555	0.22314	NaN	NaN	NaN	NaN	NaN	NaN
0.686	46.747	177.992	879.531	-0.88965	0.80469	-0.047852	-14.586	113.951	262.60956	-0.39482	0.27275	0.02041	-34.887	-18.311	47.492	0.073975	0.019531	0.23364	NaN	NaN	NaN	NaN	NaN	NaN
0.688	42.473	178.192	889.009	-0.90088	0.81299	-0.04834	-4.566	131.512	234.3934	-0.34658	0.26387	0.018555	-40.305	33.4423	26.5995	0.058105	0.016602	0.23633	NaN	NaN	NaN	NaN	NaN	NaN
0.69	10.548	187.752	884.518	-0.92627	0.81787	-0.051758	-22.419	85.957	238.666	-0.28857	0.25928	0.0068359	-22.691	30.1653	58.596	0.04248	0.015625	0.24805	NaN	NaN	NaN	NaN	NaN	NaN
0.692	33.353	187.812	894.307	-0.94458	0.83325	-0.051026	22.928	117.861	218.249	-0.22851	0.25039	0.011523	-3.457	66.036	29.7508	0.03125	0.012207	0.24658	NaN	NaN	NaN	NaN	NaN	NaN
0.694	23.522	199.352	898.214	-0.97266	0.8418	-0.053223	18.664	96.737	181.743	-0.16934	0.24444	0.0050781	12.754	11.4038	48.706	0.019043	0.012695	0.24805	NaN	NaN	NaN	NaN	NaN	NaN
0.696	19.317	208.645	872.2602	-1.0059	0.85547	-0.047852	28.27	77.391	183.1082	-0.11035	0.22998	-0.0046875	-32.418	48.078	4.897	0.013916	0.012939	0.24781	NaN	NaN	NaN	NaN	NaN	NaN
0.698	20.168	203.366	877.712	-1.0288	0.86182	-0.047363	46.2123	108.82	167.9992	-0.061035	0.2167	-0.0080078	-0.875999999999998	7.1748	27.9332	0.0039063	0.012695	0.24902	NaN	NaN	NaN	NaN	NaN	NaN
0.7	11.676	206.503	875.218	-1.0684	0.875	-0.047363	20.908	67.4004	155.4943	-0.0053711	0.20752	-0.01416	23.716	67.172	12.6699	-1.3878e-14	0.012207	0.24023	NaN	NaN	NaN	NaN	NaN	NaN
0.702	31.378	201.399	876.67	-1.0955	0.88062	-0.039551	56.29023	61.259	154.467	0.043457	0.19394	-0.023926	48.5141	24.1191	23.9326	-0.0078125	0.013184	0.2373	NaN	NaN	NaN	NaN	NaN	NaN
0.704	26.86	202.542	884.049	-1.1206	0.88135	-0.038574	52.5191	56.518	131.473	0.088964	0.17852	-0.033887	47.07	50.699	39.1618	-0.0087891	0.014648	0.22803	NaN	NaN	NaN	NaN	NaN	NaN
0.706	19.218	201.4579	878.11	-1.1387	0.88867	-0.029297	30.138	17.7429	142.138	0.12255	0.16133	-0.04248	58.5334	-6.3254	46.044	-0.010254	0.015137	0.22314	NaN	NaN	NaN	NaN	NaN	NaN
0.708	19.142	213.318	885.106	-1.1465	0.89258	-0.029785	50.629	43.005	147.531	0.15488	0.14776	-0.048242	33.175	32.7644	30.3861	-0.012207	0.019043	0.20898	NaN	NaN	NaN	NaN	NaN	NaN
0.71	45.144	217.107	869.094	-1.1484	0.89453	-0.032227	40.315	34.168	111.284	0.18164	0.13232	-0.05957	49.019	6.2	40.529	-0.0053711	0.026855	0.2002	NaN	NaN	NaN	NaN	NaN	NaN
0.712	29.552	213.3886	854.788	-1.1377	0.89111	-0.026856	13.633	38.197	90.531	0.2085	0.11963	-0.066797	44.947	49.984	36.881	-0.0053711	0.023926	0.19727	NaN	NaN	NaN	NaN	NaN	NaN
0.714	9.763	215.992	848.769	-1.127	0.88672	-0.029785	31.345	71.599	85.555	0.22392	0.10489	-0.07666	26.628	5.3544	55.722	0.0024414	0.030273	0.18457	NaN	NaN	NaN	NaN	NaN	NaN
0.716	40.117	217.913	854.4	-1.1011	0.88721	-0.024414	-15.533	42.051	95.997	0.24463	0.092384	-0.08291	22.302	34.176	44.7551	0.0063476	0.037598	0.17627	NaN	NaN	NaN	NaN	NaN	NaN
0.718	42.175	223.69	839.478	-1.0815	0.8833	-0.022949	-8.318	52.961	117.871	0.25654	0.080957	-0.090235	31.637	-11.13498	60.517	0.012695	0.04541	0.1709	NaN	NaN	NaN	NaN	NaN	NaN
0.72	47.637	229.087	852.638	-1.0444	0.87549	-0.020996	3.25	51.049	90.015	0.26514	0.070801	-0.09375	-2.189	14.7603	59.76	0.021973	0.050781	0.16553	NaN	NaN	NaN	NaN	NaN	NaN
0.722	43.642	215.2466	842.711	-1.019	0.86963	-0.023682	-22.176	19.6719	90.979	0.27022	0.05459	-0.099803	-15.652	-15.65662	37.2944	0.027344	0.059082	0.15918	NaN	NaN	NaN	NaN	NaN	NaN
0.724	46.833	213.2349	871.371	-0.99609	0.86914	-0.02832	-8.775	51.273	105.68	0.26865	0.042383	-0.10283	-39.053	31.565	33.805	0.039551	0.074219	0.14795	NaN	NaN	NaN	NaN	NaN	NaN
0.726	47.934	235.157	873.971	-0.96533	0.86963	-0.026855	-31.23	25.25	65.338	0.26084	0.035352	-0.10596	-16.619	29.2598	17.5677	0.053223	0.086914	0.14795	NaN	NaN	NaN	NaN	NaN	NaN
0.728	24.891	265.19	889.171	-0.95654	0.87256	-0.02832	-31.148	20.7951	48.73	0.25156	0.02627	-0.1085	-22.608	49.154	32.1528	0.061523	0.094238	0.14795	NaN	NaN	NaN	NaN	NaN	NaN
0.73	57.678	277.0634	910.828	-0.95264	0.87939	-0.028809	-15.476	52.041	17.0851	0.23438	0.019531	-0.11035	-12.829	24.5845	11.1729	0.068848	0.1167	0.12646	NaN	NaN	NaN	NaN	NaN	NaN
0.732	40.53	280.5504	927.1892	-0.9751	0.88672	-0.034424	-30.29	5.3891	25.8609	0.21836	0.01289	-0.10986	-43.386	14.602	31.5172	0.087891	0.12573	0.13623	NaN	NaN	NaN	NaN	NaN	NaN
0.734	60.408	285.67854	954.08585	-1.0112	0.89697	-0.031738	-10.669	10.16903	63.9	0.20634	0.0063477	-0.10469	-56.029	11.6268	23.387	0.1001	0.13379	0.13379	NaN	NaN	NaN	NaN	NaN	NaN
0.736	46.672	291.1557	976.4819	-1.0718	0.91064	-0.028809	-25.73	15.2868	40.426	0.17783	0.0040039	-0.10547	-39.699	30.715	41.8293	0.1167	0.15234	0.12988	NaN	NaN	NaN	NaN	NaN	NaN
0.738	69.521	299.194	999.951	-1.105	0.92041	-0.029297	-29.035	-7.9026	48.522	0.15361	-0.0023437	-0.10566	-35.46	31.1372	27.685	0.12256	0.1582	0.12939	NaN	NaN	NaN	NaN	NaN	NaN
0.74	59.19	310.764	1035.492	-1.1616	0.9458	-0.026367	18.709	26.718	58.951	0.12354	-0.0053711	-0.09668	-30.637	21.9321	46.368	0.12891	0.17334	0.13037	NaN	NaN	NaN	NaN	NaN	NaN
0.742	64.948	321.044	1040.588	-1.2068	0.95288	-0.021729	-17.207	0.4593	49.641	0.093162	-0.0060547	-0.092676	-36.629	19.5211	35.2264	0.13208	0.1836	0.13135	NaN	NaN	NaN	NaN	NaN	NaN
0.744	95.62	286.296	1035.187	-1.2485	0.95947	-0.01709	-3.91500000000001	1.4574	49.081	0.060547	-0.00078124	-0.087793	-19.712	-12.4078	47.71	0.12988	0.19678	0.13281	NaN	NaN	NaN	NaN	NaN	NaN
0.746	97.387	265.452	1035.497	-1.2925	0.9751	-0.0092773	42.504	41.596	7.8956	0.031641	-0.0019531	-0.080761	-18.833	9.2056	16.2897	0.12354	0.21484	0.13574	NaN	NaN	NaN	NaN	NaN	NaN
0.748	99.913	247.1894	1030.24164	-1.3042	0.98291	-0.0073242	14.666	11.232	4.3986	0.0031252	0.0043945	-0.078027	-6.646	-9.5018	37.711	0.11328	0.2251	0.13818	NaN	NaN	NaN	NaN	NaN	NaN
0.75	78.32	229.284	1026.6171	-1.3223	0.99219	-0.0024414	43.856	15.82	43.336	-0.022949	0.0039063	-0.07373	7.056	19.4768	14.7373	0.099609	0.24658	0.14209	NaN	NaN	NaN	NaN	NaN	NaN
0.752	94.938	202.931	1019.882	-1.3274	0.99929	-0.0056153	42.245	8.306	39.002	-0.050586	0.0078125	-0.068945	19.363	-8.5459	44.037	0.085205	0.2583	0.14331	NaN	NaN	NaN	NaN	NaN	NaN
0.754	106.131	177.967	1024.563	-1.3262	1.0098	-0.0068359	18.916	-11.0815	16.134	-0.068164	0.0098633	-0.066895	39.875	33.43	18.9914	0.072266	0.27002	0.14453	NaN	NaN	NaN	NaN	NaN	NaN
0.756	114.322	151.449	1023.483	-1.2964	1.02	-0.0097656	59.2314	32.546	15.5814	-0.085352	0.012988	-0.064941	34.639	2.7097	29.4106	0.048828	0.28564	0.14355	NaN	NaN	NaN	NaN	NaN	NaN
0.758	109.262	118.9591	1033.776	-1.2734	1.0195	-0.012695	44.1639	16.4368	25.3525	-0.09707	0.021094	-0.06543	13.909	42.033	55.491	0.038086	0.29199	0.14502	NaN	NaN	NaN	NaN	NaN	NaN
0.76	102.205	92.6066	1036.527	-1.2188	1.0186	-0.018066	8.723	14.32297	62.182	-0.10156	0.026367	-0.06543	36.67	-0.311	81.133	0.016602	0.31299	0.1377	NaN	NaN	NaN	NaN	NaN	NaN
0.762	124.371	88.978	1039.58	-1.1727	1.0071	-0.026123	49.1683	46.412	27.015	-0.10517	0.025977	-0.074317	43.284	36.8337	60.814	-0.01416	0.32861	0.13354	NaN	NaN	NaN	NaN	NaN	NaN
0.764	118.308	92.826	1039.785	-1.1226	0.99658	-0.020996	38.4687	14.6652	-4.105	-0.11123	0.025097	-0.077246	64.2719	-13.672	73.885	-0.041016	0.34326	0.13086	NaN	NaN	NaN	NaN	NaN	NaN
0.766	117.503	85.788	1053.293	-1.0566	0.9668	-0.025391	19.011	21.6568	31.5384	-0.10615	0.027051	-0.078027	51.694	8.058	81.717	-0.088867	0.36035	0.125	NaN	NaN	NaN	NaN	NaN	NaN
0.768	115.418	60.329	1046.044	-1.0264	0.95898	-0.023438	27.856	19.8509	36.051	-0.10029	0.030566	-0.084277	21.859	-63.0099	129.803	-0.11572	0.37158	0.12354	NaN	NaN	NaN	NaN	NaN	NaN
0.77	120.828	36.0464	1049.541	-0.97119	0.9458	-0.026367	5.953	2.0048	49.137	-0.09082	0.037598	-0.087891	-8.543	-47.375	148.7156	-0.18359	0.3877	0.12109	NaN	NaN	NaN	NaN	NaN	NaN
0.772	110.178	15.236	1057.582	-0.9419	0.93799	-0.01709	6.243	37.981	29.3918	-0.080468	0.041797	-0.09668	-15.1978	-92.825	152.823	-0.23291	0.4104	0.11694	NaN	NaN	NaN	NaN	NaN	NaN
0.774	58.064	21.688	1082.893	-0.91406	0.92773	-0.012695	-9.395	18.6555	18.4445	-0.065429	0.050977	-0.099804	-46.109	-46.8384	213.4305	-0.2876	0.43018	0.1123	NaN	NaN	NaN	NaN	NaN	NaN
0.776	75.075	12.979149	1109.483	-0.89063	0.91016	0.00097656	-14.253	8.7987	60.106	-0.053321	0.055664	-0.10762	-32.726	-62.048	313.096	-0.37061	0.46338	0.10352	NaN	NaN	NaN	NaN	NaN	NaN
0.778	81.5691	3.679	1101.128	-0.88672	0.89844	0.01123	-21.199	31.3699	51.159	-0.034668	0.066797	-0.11357	-42.1523	-18.2046	404.672	-0.41748	0.48291	0.10303	NaN	NaN	NaN	NaN	NaN	NaN
0.78	54.273	-11.094	1090.1041	-0.88623	0.8833	0.025391	-28.271	14.8715	23.5193	-0.0097656	0.074219	-0.1167	-22.242	-26.0065	477.0491	-0.521	0.51123	0.098145	NaN	NaN	NaN	NaN	NaN	NaN
0.782	7.36499999999999	-34.9606	1094.0436	-0.89209	0.86572	0.030762	-3.162	35.8494	33.36	0.0054688	0.075879	-0.12275	-34.453	34.6345	581.036	-0.62964	0.52807	0.091552	NaN	NaN	NaN	NaN	NaN	NaN
0.784	19.936	-59.7338	1104.939	-0.89844	0.84961	0.040527	-22.747	27.3609	41.648	0.023047	0.083204	-0.12647	-21.65	24.877	729.927	-0.76074	0.5459	0.087891	NaN	NaN	NaN	NaN	NaN	NaN
0.786	-3.379	-68.846	1104.264	-0.91602	0.83789	0.046875	-37.349	-16.889	72.658	0.046094	0.090235	-0.13506	-25.873	75.092	902.726	-0.95654	0.57861	0.078125	NaN	NaN	NaN	NaN	NaN	NaN
0.788	-27.4121	-91.312	1112.2259	-0.92969	0.83301	0.053711	-6.497	-9.541	79.243	0.069531	0.09785	-0.14082	34.557	63.064	1013.3344	-1.0684	0.59375	0.077148	NaN	NaN	NaN	NaN	NaN	NaN
0.79	-39.587	-129.2018	1111.748	-0.95068	0.82666	0.050781	-33.7806	-23.15	63.2318	0.093262	0.10254	-0.14502	27.703	75.762	1112.06508	-1.3276	0.62451	0.068359	NaN	NaN	NaN	NaN	NaN	NaN
0.792	-35.33	-162.9692	1101.562	-0.96753	0.8313	0.05664	-5.424	-37.776	110.17	0.11397	0.10967	-0.15293	24.275	32.235	1180.8743	-1.5457	0.66284	0.055908	NaN	NaN	NaN	NaN	NaN	NaN
0.794	-52.341	-175.598	1103.563	-0.98438	0.83203	0.060547	31.657	-21.44	134.631	0.13106	0.11894	-0.16045	1.34	-28.159	1258.066	-1.7456	0.71533	0.055176	NaN	NaN	NaN	NaN	NaN	NaN
0.796	-68.615	-178.305	1067.139	-1.0073	0.84424	0.074219	-18.869	-51.072	119.004	0.14199	0.12442	-0.17022	-4.335	-70.183	1241.654	-1.9917	0.77588	0.038086	NaN	NaN	NaN	NaN	NaN	NaN
0.798	-67.349	-194.2707	1050.747	-1.0229	0.85693	0.085693	17.491	-40.213	123.8297	0.14453	0.13145	-0.17217	21.912	-124.601	1229.148	-2.0977	0.80469	0.023926	NaN	NaN	NaN	NaN	NaN	NaN
0.8	-72.037	-200.2071	1036.963	-1.0361	0.87109	0.094238	33.91	-25.152	148.474	0.14697	0.13916	-0.17773	61.28	-149.8554	1184.567	-2.2085	0.84814	0	NaN	NaN	NaN	NaN	NaN	NaN
0.802	-63.452	-190.757	1039.814	-1.0542	0.88818	0.10498	-7.217	-40.1193	221.936	0.12959	0.14385	-0.17812	100.324	-196.669	1180.973	-2.1885	0.90429	-0.021484	NaN	NaN	NaN	NaN	NaN	NaN
0.804	-66.708	-202.45238	1050.259	-1.064	0.896	0.10889	40.028	-9.8031	291.959	0.10361	0.15078	-0.1791	125.5311	-190.726	1112.809	-2.084	0.97461	-0.024902	NaN	NaN	NaN	NaN	NaN	NaN
0.806	-48.644	-206.091	1029.658	-1.0703	0.91113	0.11816	26.322	-10.4411	329.6625	0.064941	0.15586	-0.17598	121.264	-200.906	1057.9769	-1.8335	1.0776	-0.027832	NaN	NaN	NaN	NaN	NaN	NaN
0.808	-68.252	-197.5838	1036.621	-1.074	0.92359	0.12329	17.877	16.1851	417.634	0.018945	0.16103	-0.1749	112.16	-124.24	979.75	-1.6733	1.1147	-0.028809	NaN	NaN	NaN	NaN	NaN	NaN
0.81	-58.948	-177.085	1019.8951	-1.082	0.93555	0.12549	32.4336	75.3648	498.353	-0.036621	0.17236	-0.1709	136.112	-104.584	991.014	-1.3574	1.0859	-0.030273	NaN	NaN	NaN	NaN	NaN	NaN
0.812	-65.527	-165.386	1029.499	-1.1011	0.95557	0.12988	-27.7279	84.9757	574.027	-0.0959	0.18154	-0.17187	140.701	-45.033	999.706	-1.1428	1.0066	-0.038085	NaN	NaN	NaN	NaN	NaN	NaN
0.814	-61.581	-161.215	1032.274	-1.105	0.96924	0.12354	-7.251	123.876	652.58	-0.15957	0.19775	-0.16728	162.9153	-68.123	1021.02	-0.95264	0.92139	-0.046387	NaN	NaN	NaN	NaN	NaN	NaN
0.816	-40.693	-168.297	1032.018	-1.1343	0.99658	0.12891	-18.983	150.549	696.9878	-0.23262	0.21338	-0.17276	123.08097	-31.335	1011.965	-0.75977	0.82031	-0.061523	NaN	NaN	NaN	NaN	NaN	NaN
0.818	-32.518	-185.581	1038.4112	-1.1531	1.009	0.1272	-27.2223	105.143	794.4332	-0.3124	0.22783	-0.1708	101.9841	-69.038	1044.366	-0.7002	0.8125	-0.058105	NaN	NaN	NaN	NaN	NaN	NaN
0.82	-43.801	-198.1743	1064.7524	-1.1782	1.02	0.12012	-8.257	84.485	877.242	-0.39746	0.24414	-0.17041	37.107	-35.58	1041.2056	-0.64453	0.84277	-0.07959	NaN	NaN	NaN	NaN	NaN	NaN
0.822	-31.51	-209.01528	1075.875	-1.2007	1.0317	0.12354	-17.976	32.4439	891.86	-0.49531	0.26338	-0.16894	49.067	-81.971	1039.512	-0.67041	0.91211	-0.045164	NaN	NaN	NaN	NaN	NaN	NaN
0.824	-37.246	-209.51236	1092.56	-1.2095	1.0298	0.11963	-16.697	-16.0425	935.966	-0.60156	0.28555	-0.16563	8.0875	-116.862	1036.639	-0.7417	0.99756	-0.012695	NaN	NaN	NaN	NaN	NaN	NaN
0.826	-19.4304	-212.5893	1087.912	-1.2148	1.0313	0.10791	33.021	-21.746	930.663	-0.71758	0.31719	-0.16094	-13.538	-216.624	1081.457	-0.85889	1.0122	-0.1416	NaN	NaN	NaN	NaN	NaN	NaN
0.828	-41.794	-209.7639	1086.062	-1.2156	1.0364	0.10108	-6.656	-83.6584	935.558	-0.846	0.34951	-0.16064	-60.7713	-266.492	1149.041	-0.84717	1.0415	-0.085938	NaN	NaN	NaN	NaN	NaN	NaN
0.83	-7.77125	-224.136	1091.246	-1.2129	1.0332	0.097168	1.825	-113.2078	934.689	-0.9917	0.38184	-0.14551	-75.089	-326.675	1221.99	-0.92969	1.042	-0.047852	NaN	NaN	NaN	NaN	NaN	NaN
0.832	-25.089	-215.646	1099.293	-1.2031	1.0313	0.085938	-2.536	-106.263	878.888	-1.1468	0.41162	-0.12207	-119.094	-340.859	1256.973	-1.0532	1.0639	-0.050782	NaN	NaN	NaN	NaN	NaN	NaN
0.834	-50.242	-206.2793	1115.649	-1.1953	1.0273	0.092285	-46.5217	-122.028	883.223	-1.3182	0.44277	-0.089161	-148.847	-352.284	1299.41	-1.1758	1.0605	-0.038086	NaN	NaN	NaN	NaN	NaN	NaN
0.836	-60.77	-199.1191	1117.325	-1.168	1.0254	0.087402	-36.367	-83.125	898.454	-1.4967	0.47598	-0.040332	-172.875	-306.633	1328.22	-1.3223	1.082	-0.039551	NaN	NaN	NaN	NaN	NaN	NaN
0.838	-41.918	-192.2078	1114.829	-1.1423	1.0227	0.084229	-79.784	-57.204	862.783	-1.6895	0.50635	0.0030273	-111.917	-255.587	1353.625	-1.3921	1.0903	-0.046387	NaN	NaN	NaN	NaN	NaN	NaN
0.84	-46.235	-177.5076	1103.793	-1.1157	1.0181	0.081543	-97.233	-47.644	857.12	-1.8828	0.53809	0.03125	-110.521	-171.617	1409.959	-1.5176	1.1045	-0.053223	NaN	NaN	NaN	NaN	NaN	NaN
0.842	-54.971	-157.587	1091.133	-1.083	1.0137	0.07666	-55.837	-11.3684	845.068	-2.0404	0.5832	0.052246	-108.873	-122.836	1442.9323	-1.6094	1.1114	-0.051025	NaN	NaN	NaN	NaN	NaN	NaN
0.844	-37.8702	-157.164	1089.886	-1.0674	1.0088	0.068359	-113.085	-18.654	848.774	-2.1452	0.62041	0.051367	-117.188	-97.091	1478.627	-1.7007	1.1099	-0.041992	NaN	NaN	NaN	NaN	NaN	NaN
0.846	-51.131	-150.854	1070.08	-1.0464	1.0024	0.068848	-69.013	-13.781	881.268	-2.1749	0.66885	0.033399	-85.856	-87.456	1502.699	-1.8301	1.1074	-0.02832	NaN	NaN	NaN	NaN	NaN	NaN
0.848	-66.586	-145.018	1072.8746	-1.0322	0.99976	0.066894	-23.27501	5.583	856.5053	-2.1402	0.72314	0.018457	-53.5742	-85.29	1515.719	-1.8887	1.1016	-0.024414	NaN	NaN	NaN	NaN	NaN	NaN
0.85	-83.586	-155.972	1077.8668	-1.0288	1.0015	0.062012	-30.674	-37.377	869.767	-2.0425	0.78174	0.0068359	-40.013	-67.207	1520.426	-1.9839	1.0884	-0.0087891	NaN	NaN	NaN	NaN	NaN	NaN
0.852	-67.532	-166.9406	1069.4599	-1.0308	0.99658	0.067383	16.538	-66.011	916	-1.9076	0.8041	-0.003418	-29.878	-66.675	1542.181	-2.0545	1.074	-0.0061036	NaN	NaN	NaN	NaN	NaN	NaN
0.854	-77.235	-166.2441	1069.426	-1.0332	0.99219	0.06543	3.75	-108.464	917.2	-1.7399	0.79317	-0.024414	-26.705	-70.6074	1514.419	-2.1104	1.0625	0.0073242	NaN	NaN	NaN	NaN	NaN	NaN
0.856	-68.801	-155.4154	1057.4704	-1.0347	0.98975	0.067871	4.047	-171.933	967.728	-1.5351	0.73769	-0.051758	-10.624	-101.4643	1528.167	-2.1655	1.0728	0.020996	NaN	NaN	NaN	NaN	NaN	NaN
0.858	-61.209	-153.0147	1064.283	-1.0383	0.99145	0.072266	39.052	-195.577	1009.3067	-1.3166	0.65879	-0.089354	3.837	-126.994	1561.697	-2.1831	1.0854	0.025879	NaN	NaN	NaN	NaN	NaN	NaN
0.86	-60.865	-151.0786	1064.379	-1.0342	0.98633	0.074219	2.115	-231.2067	1043.252	-1.1133	0.58398	-0.12793	45.468	-164.709	1650.387	-2.2144	1.0806	0.03418	NaN	NaN	NaN	NaN	NaN	NaN
0.862	-59.25	-157.1862	1076.019	-1.0293	0.97852	0.073242	25.379	-251.352	1102.831	-0.94209	0.53252	-0.16709	85.7194	-177.991	1703.601	-2.2202	1.0659	0.036621	NaN	NaN	NaN	NaN	NaN	NaN
0.864	-50.547	-158.5721	1056.789	-1.0215	0.97266	0.070801	54.076	-202.21	1121.091	-0.80508	0.50312	-0.18457	132.515	-185.504	1736.192	-2.2144	1.061	0.037598	NaN	NaN	NaN	NaN	NaN	NaN
0.866	-37.839	-159.7215	1058.395	-1.0078	0.96973	0.081543	23.199	-180.911	1158.6029	-0.71953	0.49179	-0.19277	117.987	-146.439	1709.769	-2.1772	1.0747	0.041016	NaN	NaN	NaN	NaN	NaN	NaN
0.868	-22.771	-140.8817	1036.529	-0.99586	0.95972	0.078369	43.181	-154.78	1237.633	-0.69277	0.51133	-0.19765	127.886	-123.4318	1734.288	-2.1396	1.0801	0.057373	NaN	NaN	NaN	NaN	NaN	NaN
0.87	-14.9034	-118.155	1008.528748	-0.97607	0.95557	0.074219	27.089	-122.7392	1255.843	-0.70313	0.56543	-0.18994	94.161	-77.9886	1698.6075	-2.1016	1.0879	0.062012	NaN	NaN	NaN	NaN	NaN	NaN
0.872	-24.502	-111.722	995.33627	-0.94727	0.94336	0.077148	42.237	-132.9047	1310.3	-0.78994	0.65908	-0.16699	119.009	-60.279	1700.7556	-2.0586	1.0869	0.061035	NaN	NaN	NaN	NaN	NaN	NaN
0.874	-16.5488	-99.569	977.761	-0.93164	0.93848	0.07959	83.39954	-106.772	1346.991	-0.91435	0.75869	-0.18106	89.318	-37.6561	1669.2142	-2.0386	1.0767	0.062012	NaN	NaN	NaN	NaN	NaN	NaN
0.876	0.151	-100.529	959.213	-0.89453	0.91992	0.080078	48.641	-96.24	1318.984	-0.99408	0.78994	-0.17675	65.602	-28.698	1670.861	-1.9883	1.0391	0.092773	NaN	NaN	NaN	NaN	NaN	NaN
0.878	5.69	-94.932	967.227	-0.87085	0.9104	0.077392	74.735	-108.484	1340.553	-1.0491	0.76982	-0.15068	25.022	-16.6	1660.024	-1.9842	1.0237	0.10156	NaN	NaN	NaN	NaN	NaN	NaN
0.88	5.349	-89.096	968.313	-0.8457	0.89258	0.075684	93.0801	-64.99	1330.409	-1.1431	0.75244	-0.12354	7.6	-17.634	1635.07396	-1.9648	1.0117	0.13184	NaN	NaN	NaN	NaN	NaN	NaN
0.882	-12.475	-86.9472	958.519	-0.80469	0.87695	0.077148	17.256	-75.079	1336.691	-1.2696	0.76719	-0.09961	-36.881	-7.748	1616.545	-1.9468	1.0552	0.13867	NaN	NaN	NaN	NaN	NaN	NaN
0.884	6.4502	-86.0542	927.8656	-0.78418	0.86914	0.070313	20.198	-90.236	1384.032	-1.3906	0.79853	-0.070703	-34.726	7.0716	1597.547	-1.9565	1.0562	0.12012	NaN	NaN	NaN	NaN	NaN	NaN
0.886	-11.628	-85.1153	900.2201	-0.74268	0.8501	0.070801	2.47	-80.4543	1396.07	-1.4968	0.8376	-0.054297	-55.935	32.6069	1587.6277	-1.9526	1.0278	0.080078	NaN	NaN	NaN	NaN	NaN	NaN
0.888	-2.952	-83.935	894.8874	-0.71436	0.83496	0.067627	-3.611	-120.533	1460.693	-1.5818	0.87188	-0.041504	-35.189	44.584	1608.594	-1.9199	0.99269	0.083496	NaN	NaN	NaN	NaN	NaN	NaN
0.89	6.697	-89.2822	882.65	-0.68701	0.82666	0.064941	33.482	-128.388	1510.737	-1.6543	0.89844	-0.043945	-44.934	58.1694	1626.107	-1.8979	0.96338	0.094727	NaN	NaN	NaN	NaN	NaN	NaN
0.892	5.964	-91.249	878.6	-0.65234	0.79883	0.059082	-23.21	-117.318	1482.931	-1.71	0.90254	-0.058886	-63.7313	37.7305	1638.933	-1.9136	0.95557	0.10547	NaN	NaN	NaN	NaN	NaN	NaN
0.894	-22.196	-85.685	870.779	-0.63428	0.78369	0.057129	-0.032	-144.507	1512.674	-1.755	0.89893	-0.06748	-96.298	31.581	1651.763	-1.9194	0.95557	0.11963	NaN	NaN	NaN	NaN	NaN	NaN
0.896	-28.375	-89.027	866.831	-0.6001	0.76611	0.050781	26.383	-104.88866	1534.584	-1.796	0.8876	-0.086231	-94.568	15.0868	1667.539	-1.9175	0.9585	0.11572	NaN	NaN	NaN	NaN	NaN	NaN
0.898	-15.35	-92.5955	845.39	-0.57934	0.75317	0.048828	-34.735	-104.86732	1547.151	-1.831	0.88623	-0.10195	-93.104	26.2942	1659.65	-1.8848	0.95459	0.11011	NaN	NaN	NaN	NaN	NaN	NaN
0.9	-22.004	-87.77312	814.831	-0.56104	0.73779	0.043945	8.745	-114.469	1574.369	-1.8774	0.88721	-0.12354	-70.2734	16.423	1651.469	-1.8569	0.9458	0.11035	NaN	NaN	NaN	NaN	NaN	NaN
0.902	-23.713	-65.8367	787.9025	-0.53271	0.72119	0.037109	19.34	-64.2719	1534.7963	-1.903	0.88643	-0.14571	-53.698	21.9752	1609.09	-1.8203	0.9375	0.11475	NaN	NaN	NaN	NaN	NaN	NaN
0.904	-42.7954	-52.0574	775.669	-0.52148	0.70898	0.03418	-3.613	-77.6661	1545.5279	-1.9245	0.89073	-0.16914	-51.423	21.348	1592.463	-1.8022	0.92822	0.10938	NaN	NaN	NaN	NaN	NaN	NaN
0.906	-49.1867	-49.881	753.897	-0.49805	0.69141	0.026367	16.806	-39.651	1570.598	-1.9351	0.88642	-0.19336	-61.0373	47.078	1598.744	-1.7769	0.9126	0.1123	NaN	NaN	NaN	NaN	NaN	NaN
0.908	-42.26454	-39.059	752.122	-0.48047	0.67969	0.026612	-23.835	-10.944	1533.976	-1.9322	0.87871	-0.21885	-32.876	47.449	1559.87841	-1.7671	0.89892	0.1145	NaN	NaN	NaN	NaN	NaN	NaN
0.91	-48.5829	-43.542	726.0508	-0.46631	0.66846	0.025879	-3.72000000000001	-39.4159	1549.779	-1.9214	0.86768	-0.24365	1.809	90.222	1548.1229	-1.7568	0.88086	0.11621	NaN	NaN	NaN	NaN	NaN	NaN
0.912	-49.115	-44.712	730.272	-0.44336	0.65234	0.020996	50.505	-5.7935	1556.078	-1.9157	0.85118	-0.26484	48.758	128.8009	1521.129	-1.7461	0.86719	0.12109	NaN	NaN	NaN	NaN	NaN	NaN
0.914	-34.7861	-33.874	716.785	-0.44238	0.64648	0.019043	-11.167	-8.8565	1551.8785	-1.9078	0.84063	-0.28496	105.1565	176.74	1497.777	-1.7358	0.85986	0.12061	NaN	NaN	NaN	NaN	NaN	NaN
0.916	-18.076	-19.606	683.021	-0.42627	0.6333	0.021973	29.789	-12.3949	1571.1844	-1.9031	0.82187	-0.3084	87.4076	198.855	1479.569	-1.7188	0.84766	0.12744	NaN	NaN	NaN	NaN	NaN	NaN
0.918	-37.035	-12.843	654.7402	-0.41968	0.62719	0.017822	25.527	41.0161	1543.121	-1.8907	0.8081	-0.32774	96.5152	199.302	1452.7022	-1.7002	0.83593	0.13476	NaN	NaN	NaN	NaN	NaN	NaN
0.92	-12.178	-18.228	637.1709	-0.41797	0.62207	0.014648	-6.924	16.1432	1562.897	-1.877	0.79785	-0.34375	79.4279	185.658	1443.93	-1.6851	0.8208	0.13721	NaN	NaN	NaN	NaN	NaN	NaN
0.922	-11.545	-34.2574	635.698	-0.40576	0.61182	0.013184	71.618	15.106	1591.363	-1.8672	0.77695	-0.35752	103.5962	171.413	1447.703	-1.668	0.80664	0.13916	NaN	NaN	NaN	NaN	NaN	NaN
0.924	-2.469	-27.832	636.918	-0.40186	0.60596	0.01123	72.7326	17.28	1568.331	-1.8543	0.76172	-0.36856	118.1709	170.0858	1417.219	-1.6572	0.79883	0.14209	NaN	NaN	NaN	NaN	NaN	NaN
0.926	-1.855	-37.9057	634.975	-0.39063	0.5957	0.010742	76.97219	-40.3104	1603.451	-1.8481	0.73985	-0.37559	119.4472	163.9774	1379.902	-1.626	0.77734	0.13965	NaN	NaN	NaN	NaN	NaN	NaN
0.928	-4.837	-30.2659	629.34	-0.38452	0.58911	0.010254	108.916	-16.1262	1605.393	-1.8509	0.72393	-0.38271	91.0485	161.029	1317.5446	-1.5974	0.76221	0.14355	NaN	NaN	NaN	NaN	NaN	NaN
0.93	14.7212	-29.5032	595.47	-0.37402	0.58008	0.0058594	50.696	-10.5592	1565.833	-1.8628	0.71338	-0.38428	66.439	143.488	1273.6449	-1.5601	0.75049	0.14941	NaN	NaN	NaN	NaN	NaN	NaN
0.932	1.133	-32.628	588.761	-0.36475	0.56885	0.003418	73.417	-15.5435	1560.7558	-1.8822	0.70254	-0.3873	38.556	158.6852	1231.794	-1.5098	0.7168	0.1416	NaN	NaN	NaN	NaN	NaN	NaN
0.934	-3.382	-24.7681	565.881	-0.35327	0.56225	0.00048827	64.954	41.124	1517.79	-1.9083	0.69365	-0.38633	51.039	146.4294	1219.517	-1.4805	0.70117	0.13721	NaN	NaN	NaN	NaN	NaN	NaN
0.936	2.444	-25.0876	540.445	-0.34424	0.55127	-0.0014648	23.368	31.149	1497.281	-1.9396	0.6917	-0.38438	38.752	173.1251	1199.536	-1.4199	0.66992	0.1333	NaN	NaN	NaN	NaN	NaN	NaN
0.938	27.5718	-26.2702	524.167	-0.32861	0.54346	-0.00048828	82.383	47.4527	1508.768	-1.9615	0.69844	-0.38223	28.526	193.367	1202.565	-1.3755	0.64599	0.12866	NaN	NaN	NaN	NaN	NaN	NaN
0.94	20.102	-19.7083	521.568	-0.32666	0.53613	-0.0014648	55.786	76.332	1505.72	-1.9844	0.70313	-0.37891	-3.257	248.042	1170.151	-1.3218	0.62842	0.12451	NaN	NaN	NaN	NaN	NaN	NaN
0.942	7.829	-14.6602	533.401	-0.31055	0.52441	-0.0053711	29.053	36.744	1526.392	-1.9929	0.7083	-0.38896	-1.924	252.824	1112.539	-1.2637	0.58789	0.11572	NaN	NaN	NaN	NaN	NaN	NaN
0.944	9.083	-19.6164	518.165	-0.2981	0.5149	-0.0065918	67.362	83.643	1502.702	-1.9952	0.71689	-0.39639	-39.405	285.844	1056.0834	-1.2363	0.56836	0.11426	NaN	NaN	NaN	NaN	NaN	NaN
0.946	8.618	-6.496	488.87	-0.28467	0.50684	-0.01123	21.043	91.797	1452.5492	-1.9843	0.72627	-0.39951	-46.931	275.739	1015.784	-1.1719	0.54004	0.10107	NaN	NaN	NaN	NaN	NaN	NaN
0.948	-18.347	2.797	472.407	-0.27295	0.49365	-0.011719	62.533	73.334	1436.5262	-1.9711	0.73125	-0.40879	-54.786	289.68	978.584	-1.1246	0.51026	0.098143	NaN	NaN	NaN	NaN	NaN	NaN
0.95	-21.679	-0.9235	465.053	-0.26123	0.48682	-0.016113	67.133	120.23	1391.7572	-1.9565	0.72803	-0.41943	-49.768	258.549	931.484	-1.0679	0.49072	0.091797	NaN	NaN	NaN	NaN	NaN	NaN
0.952	-11.952	-2.22521	450.3	-0.24512	0.46924	-0.015137	4.656	82.027	1379.3718	-1.943	0.73086	-0.42012	-54.71	256.7	880.071	-1.0078	0.45898	0.080078	NaN	NaN	NaN	NaN	NaN	NaN
0.954	-23.976	4.4221	421.306	-0.23364	0.45996	-0.017334	66.702	79.08	1388.429	-1.9269	0.73564	-0.42315	-59.8522	218.8689	852.444	-0.96875	0.44531	0.077637	NaN	NaN	NaN	NaN	NaN	NaN
0.956	-40.13369	9.9088	416.785	-0.22363	0.4502	-0.018066	-0.738	80.892	1378.06	-1.9085	0.73994	-0.43369	-58.578	227.341	810.789	-0.8877	0.41992	0.071289	NaN	NaN	NaN	NaN	NaN	NaN
0.958	-39.0583	-0.0979000000000001	420.704	-0.20752	0.43457	-0.022949	2.23999999999999	24.65336	1402.338	-1.8857	0.74239	-0.43887	-49.636	201.7658	778.0439	-0.84936	0.39331	0.062988	NaN	NaN	NaN	NaN	NaN	NaN
0.96	-31.232	-9.7941	420.25	-0.19678	0.42822	-0.02002	37.217	67.524	1373.316	-1.8496	0.74219	-0.44141	-26.914	237.89	754.966	-0.80859	0.37305	0.054688	NaN	NaN	NaN	NaN	NaN	NaN
0.962	-34.627	-6.4571	405.908	-0.18164	0.41406	-0.02832	-18.843	80.8878	1322.773	-1.816	0.73867	-0.44434	-3.979	210.047	730.82	-0.73975	0.34912	0.055664	NaN	NaN	NaN	NaN	NaN	NaN
0.964	-39.391	0.0680000000000014	395.037	-0.17212	0.40698	-0.025391	39.317	90.236	1311.341	-1.7808	0.7289	-0.44394	28.786	232.722	716.954	-0.72021	0.33154	0.053711	NaN	NaN	NaN	NaN	NaN	NaN
0.966	-32.5888	-0.266	378.724	-0.16113	0.3999	-0.022949	53.14	154.252	1277.363	-1.734	0.71954	-0.44668	40.929	203.2704	677.207	-0.65527	0.31006	0.041504	NaN	NaN	NaN	NaN	NaN	NaN
0.968	-31.183	-6.8568	367.358	-0.15234	0.38623	-0.03125	5.178	128.907	1264.822	-1.6944	0.7165	-0.43975	46.512	216.189	626.3	-0.61865	0.2771	0.038086	NaN	NaN	NaN	NaN	NaN	NaN
0.97	-35.7096	9.1643	348.0174	-0.14697	0.38184	-0.029785	56.81	129.6903	1269.506	-1.6582	0.69922	-0.44043	49.386	192.4892	586.474	-0.58691	0.2627	0.025879	NaN	NaN	NaN	NaN	NaN	NaN
0.972	-29.832	0.6605	337.3816	-0.13379	0.37207	-0.03125	54.961	159.669	1237.799	-1.6289	0.69297	-0.43281	74.868	196.809	533.504	-0.52539	0.23975	0.029297	NaN	NaN	NaN	NaN	NaN	NaN
0.974	-15.058	6.12692	332.513	-0.13184	0.36328	-0.032715	52.635	135.928	1241.995	-1.6019	0.68213	-0.42236	75.01587	176.513	482.013	-0.50098	0.22949	0.026367	NaN	NaN	NaN	NaN	NaN	NaN
0.976	-7.101	3.766	337.101	-0.12451	0.36377	-0.037598	82.4881	187.625	1209.963	-1.5733	0.67314	-0.41104	93.3976	194.2684	431.352	-0.45264	0.20361	0.026855	NaN	NaN	NaN	NaN	NaN	NaN
0.978	-14.018	7.9232	334.357	-0.11914	0.35352	-0.037109	29.581	184.185	1137.7578	-1.5444	0.66006	-0.39561	81.293	160.996	388.0751	-0.40844	0.18726	0.025146	NaN	NaN	NaN	NaN	NaN	NaN
0.98	-2.06	-0.34226	329.348	-0.11865	0.34766	-0.033691	64.9568	157.682	1141.652	-1.5176	0.64453	-0.37891	59.3459	151.674	362.966	-0.36035	0.17676	0.023438	NaN	NaN	NaN	NaN	NaN	NaN
0.982	4.928	3.62219	328.87	-0.11475	0.3374	-0.036133	65.435	184.9935	1099.69303	-1.492	0.62461	-0.3709	18.468	117.2056	334.5746	-0.31348	0.14941	0.01709	NaN	NaN	NaN	NaN	NaN	NaN
0.984	30.2279	8.0379	303.3644	-0.11328	0.33203	-0.033691	32.087	136.779	1090.3908	-1.4644	0.60948	-0.35723	46.768	111.744	280.368	-0.27832	0.14697	0.015137	NaN	NaN	NaN	NaN	NaN	NaN
0.986	20.559	15.7297	297.897	-0.10938	0.32813	-0.036621	75.4879	151.863	1070.984	-1.4362	0.59307	-0.34707	51.143	120.59	262.6772	-0.21924	0.12793	0.015625	NaN	NaN	NaN	NaN	NaN	NaN
0.988	30.977	7.5272	282.09071	-0.10791	0.32275	-0.04248	35.927	183.5369	1019.475	-1.4034	0.56865	-0.33428	34.424	132.675	262.088	-0.17846	0.11938	0.008789	NaN	NaN	NaN	NaN	NaN	NaN
0.99	19.341	3.5011	281.2902	-0.10986	0.31152	-0.041992	40.839	150.078	1035.384	-1.3809	0.55078	-0.31641	19.251	129.066	244.898	-0.13672	0.099609	0.0097656	NaN	NaN	NaN	NaN	NaN	NaN
0.992	24.03	7.4692	281.3331	-0.11035	0.30957	-0.030273	71.455	203.3227	1009.157	-1.344	0.53984	-0.30654	-3.828	109.46	240.286	-0.090332	0.070801	0.0019531	NaN	NaN	NaN	NaN	NaN	NaN
0.994	11.95	15.884	288.016	-0.10815	0.30689	-0.034912	-6.315	189.097	955.3807	-1.3132	0.52705	-0.29483	-58.7831	96.4087	191.3963	-0.060547	0.068359	0.00048828	NaN	NaN	NaN	NaN	NaN	NaN
0.996	11.608	14.5243	291.62	-0.10645	0.29883	-0.037598	37.89	173.0351	950.907	-1.2827	0.50986	-0.27881	-70.3541	76.191	183.3097	-0.020996	0.049316	-0.0039063	NaN	NaN	NaN	NaN	NaN	NaN
0.998	22.5168	11.7393	294.286	-0.10205	0.29053	-0.03125	33.824	205.204	904.686	-1.2535	0.49062	-0.26836	-67.22463	88.518	168.051	0.0075684	0.039551	-0.0092774	NaN	NaN	NaN	NaN	NaN	NaN
1	28.016	10.8828	287.33	-0.10352	0.28662	-0.033203	-10.581	175.717	879.729	-1.228	0.47705	-0.25977	-60.236	69.476	144.594	0.041504	0.020996	-0.012695	NaN	NaN	NaN	NaN	NaN	NaN
1.002	7.997	20.4376	278.171	-0.10156	0.28223	-0.02832	19.857	195.9733	838.858	-1.1874	0.46377	-0.24502	-69.974	62.276	112.197	0.08252	0.0063477	-0.019531	NaN	NaN	NaN	NaN	NaN	NaN
1.004	6.632	20.8336	269.624	-0.10279	0.27173	-0.025879	-26.817	212.582	782.4527	-1.1589	0.45303	-0.23233	-78.807	29.743	112.109	0.097901	0.0024414	-0.028564	NaN	NaN	NaN	NaN	NaN	NaN
1.006	8.166	21.5276	263.298	-0.10449	0.26416	-0.023926	-28.916	181.348	767.0371	-1.1269	0.43819	-0.21709	-76.7553	42.672	101.7408	0.12305	-0.010254	-0.037598	NaN	NaN	NaN	NaN	NaN	NaN
1.008	0.991999999999997	24.28644	263.34587	-0.10205	0.25488	-0.023438	17.083	206.53	742.554	-1.0971	0.42949	-0.20175	-35.853	31.1241	107.227	0.15039	-0.021973	-0.038086	NaN	NaN	NaN	NaN	NaN	NaN
1.01	-18.093	22.5617	270.2296	-0.10742	0.25049	-0.024414	-55.8735	178.7918	697.6628	-1.0645	0.41797	-0.18945	-13.838	68.086	89.078	0.14893	-0.023926	-0.044922	NaN	NaN	NaN	NaN	NaN	NaN
1.012	-11.964	23.3165	279.269	-0.11084	0.24658	-0.021484	-5.983	171.2549	682.6281	-1.0329	0.41123	-0.17861	-48.0146	55.579	71.764	0.16162	-0.032715	-0.050293	NaN	NaN	NaN	NaN	NaN	NaN
1.014	-4.853	21.8493	272.1	-0.11792	0.23291	-0.012696	3.557	210.265	656.448	-0.9918	0.40039	-0.16133	-30.355	83.855	80.389	0.17725	-0.036621	-0.055664	NaN	NaN	NaN	NaN	NaN	NaN
1.016	-8.108	33.309	275.789	-0.125	0.22949	-0.017578	-19.784	179.737	623.881	-0.96211	0.39062	-0.14414	-10.483	51.259	86.17	0.18506	-0.040039	-0.057129	NaN	NaN	NaN	NaN	NaN	NaN
1.018	-20.128	26.3624	275.005	-0.13623	0.21875	-0.012207	9.189	180.085	596.0796	-0.92695	0.37969	-0.12724	-0.374000000000002	60.04	61.1327	0.18799	-0.036133	-0.064453	NaN	NaN	NaN	NaN	NaN	NaN
1.02	-23.173	28.4293	275.86	-0.14209	0.21631	-0.0083008	-23.466	188.247	533.423	-0.88623	0.37451	-0.11572	-1.53	27.5149	50.374	0.18457	-0.041992	-0.063965	NaN	NaN	NaN	NaN	NaN	NaN
1.022	-7.529	22.6374	280.043	-0.15674	0.21143	-0.0014648	9.121	165.348	535.7818	-0.84912	0.36729	-0.099416	20.793	45.655	40.6469	0.18018	-0.044434	-0.06543	NaN	NaN	NaN	NaN	NaN	NaN
1.024	-10.003	37.1	274.9279	-0.16968	0.20386	-0.00097655	35.811	203.108	523.663	-0.80976	0.35645	-0.082031	30.381	27.1592	62.4	0.17163	-0.049805	-0.069336	NaN	NaN	NaN	NaN	NaN	NaN
1.026	0.393000000000001	22.466	292.198	-0.18066	0.19922	-0.0024414	-19.043	176.997	499.915	-0.76601	0.34512	-0.069531	75.6341	51.05	41.0255	0.16797	-0.055664	-0.067383	NaN	NaN	NaN	NaN	NaN	NaN
1.028	-3.43	17.3861	305.902	-0.2002	0.19629	-0.00097656	35.657	154.037	502.719	-0.72403	0.33809	-0.055957	84.843	12.3751	34.476	0.15479	-0.055664	-0.068848	NaN	NaN	NaN	NaN	NaN	NaN
1.03	10.077	28.073	294.915	-0.21387	0.19775	0.0058594	40.557	166.228	446.52	-0.68164	0.3291	-0.041016	57.97	18.3699	30.1407	0.14648	-0.055176	-0.058594	NaN	NaN	NaN	NaN	NaN	NaN
1.032	3.82	27.01964	310.776	-0.23047	0.19531	0.010742	6.401	126.335	424.659	-0.64062	0.31523	-0.025684	67.7399	-14.9671	38.2572	0.12598	-0.04834	-0.0625	NaN	NaN	NaN	NaN	NaN	NaN
1.034	7.262	17.0501	315.469	-0.2461	0.19604	0.012939	63.4386	137.381	402.931	-0.60264	0.30694	-0.0094725	77.7326	6.89183	28.1863	0.11841	-0.04541	-0.069825	NaN	NaN	NaN	NaN	NaN	NaN
1.036	4.579	9.5666	322.451	-0.2627	0.19482	0.01416	22.411	138.092	343.3936	-0.55772	0.30381	0.0022459	51.7821	9.5303	40.786	0.10791	-0.041504	-0.070801	NaN	NaN	NaN	NaN	NaN	NaN
1.038	17.998	20.7542	310.2349	-0.27783	0.19385	0.020996	30.961	117.634	327.88	-0.51973	0.28935	0.015527	53.0236	33.856	36.892	0.086426	-0.036621	-0.073242	NaN	NaN	NaN	NaN	NaN	NaN
1.04	26.208	32.195	316.723	-0.28955	0.19336	0.022461	65.7099	134.247	309.961	-0.47168	0.28027	0.029297	46.601	22.255	57.422	0.080078	-0.039063	-0.073242	NaN	NaN	NaN	NaN	NaN	NaN
1.042	20.325	35.7535	342.687	-0.30029	0.19482	0.026855	8.886	104.624	290.583	-0.42549	0.27217	0.04834	19.679	24.5554	49.844	0.062988	-0.038574	-0.083008	NaN	NaN	NaN	NaN	NaN	NaN
1.044	14.357	34.1691	343.377	-0.30909	0.19702	0.029297	36.954	103.771	287.264	-0.38008	0.26816	0.054981	-6.257	16.0976	36.0597	0.048584	-0.037842	-0.086914	NaN	NaN	NaN	NaN	NaN	NaN
1.046	11.068	33.53	350.615	-0.31641	0.19531	0.029297	44.606	116.755	263.675	-0.32226	0.26191	0.067482	-26.998	24.1064	41.986	0.036133	-0.031738	-0.092773	NaN	NaN	NaN	NaN	NaN	NaN
1.048	9.181	34.573	370.705	-0.32129	0.20117	0.02832	4.101	99.489	242.027	-0.26074	0.24668	0.08252	-27.194	18.7704	50.08	0.02832	-0.02832	-0.10645	NaN	NaN	NaN	NaN	NaN	NaN
1.05	7.787	32.176	378.27	-0.32568	0.20117	0.031738	34.923	106.325	245.634	-0.20068	0.23145	0.097168	-24.497	24.03054	37.005	0.023926	-0.024902	-0.10889	NaN	NaN	NaN	NaN	NaN	NaN
1.052	5.406	36.43	390.11	-0.32959	0.20752	0.032227	4.051	99.948	191.117	-0.14522	0.22373	0.1038	-19.52	29.877	30.219	0.017578	-0.019531	-0.1167	NaN	NaN	NaN	NaN	NaN	NaN
1.054	16.97	36.408	384.329	-0.33593	0.20898	0.03125	7.12	61.73866	186.67	-0.081556	0.21075	0.11475	-37.544	10.366	8.5836	0.014404	-0.010254	-0.12427	NaN	NaN	NaN	NaN	NaN	NaN
1.056	-6.694	41.038	382.4711	-0.3374	0.21533	0.035156	-2.38999999999999	78.44859	154.5238	-0.026091	0.19629	0.11787	-83.1188	5.946	7.2863	0.0087891	-0.0073242	-0.12891	NaN	NaN	NaN	NaN	NaN	NaN
1.058	-13.336	44.604	392.4062	-0.35059	0.22168	0.029785	-39.355	49.0875	134.43397	0.023035	0.18086	0.13193	-75.8175	-0.811	30.093	0.010254	0.0083008	-0.14209	NaN	NaN	NaN	NaN	NaN	NaN
1.06	-3.892	41.4703	420.553	-0.35645	0.22266	0.030273	4.422	40.7866	150.958	0.07373	0.16846	0.13574	-62.3763	16.3091	31.9694	0.003418	0.0068359	-0.14453	NaN	NaN	NaN	NaN	NaN	NaN
1.062	-10.14	42.441	440.065	-0.36621	0.2334	0.029785	-13.144	50.08646	131.93	0.1132	0.15752	0.14395	-54.5901	18.88	46.3232	0	0.014648	-0.1499	NaN	NaN	NaN	NaN	NaN	NaN
1.064	-34.9098	39.0955	454.939	-0.37158	0.24414	0.026611	-30.634	31.741	134.099	0.15481	0.14773	0.14708	-62.5107	24.1017	66.703	-0.0026855	0.02002	-0.15283	NaN	NaN	NaN	NaN	NaN	NaN
1.066	-33.1199	38.7573	466.775	-0.38721	0.24854	0.028809	8.35	37.165	123.202	0.18606	0.13212	0.15215	-50.52	-9.501	50.053	-0.003418	0.022461	-0.15283	NaN	NaN	NaN	NaN	NaN	NaN
1.068	-22.019	38.6324	477.898	-0.40283	0.26123	0.020996	-23.846	34.407	101.909	0.21537	0.11239	0.15518	-54.92	18.4988	33.952	-0.0092773	0.033203	-0.15918	NaN	NaN	NaN	NaN	NaN	NaN
1.07	-35.2207	52.9	484.141	-0.41016	0.2666	0.023926	-1.054	19.1329	90.7876	0.24072	0.10107	0.15771	-37.318	20.1817	21.4886	-0.011719	0.039063	-0.15625	NaN	NaN	NaN	NaN	NaN	NaN
1.072	-38.708	43.0494	485.137	-0.42773	0.28418	0.018066	15.681	51.2419	73.5228	0.25028	0.094834	0.15673	-10.857	50.644	12.8283	-0.016602	0.043945	-0.15381	NaN	NaN	NaN	NaN	NaN	NaN
1.074	-26.593	47.423	490.981	-0.44141	0.29883	0.018555	-48.0943	37.5631	58.005	0.26372	0.083046	0.16021	11.03	26.683	38.3319	-0.017334	0.054199	-0.1521	NaN	NaN	NaN	NaN	NaN	NaN
1.076	-28.7383	57.205	508.5994	-0.44775	0.30664	0.016602	41.084	31.6772	82.72	0.26926	0.070174	0.16689	47.667	35.453	35.2232	-0.021484	0.064941	-0.14697	NaN	NaN	NaN	NaN	NaN	NaN
1.078	-33.4232	66.511	540.977	-0.46924	0.32324	0.013184	20.921	40.482	71.246	0.27539	0.061048	0.17043	38.772	4.4588	37.235	-0.017578	0.072266	-0.14551	NaN	NaN	NaN	NaN	NaN	NaN
1.08	-24.3407	51.8948	563.705	-0.48682	0.33716	0.016114	-19.963	16.5346	59.808	0.27441	0.056641	0.1709	50.2968	30.429	18.5498	-0.018066	0.083496	-0.14307	NaN	NaN	NaN	NaN	NaN	NaN
1.082	-18.004	49.724588	573.445	-0.50342	0.354	0.01709	48.101	23.2011	55.414	0.2639	0.051651	0.1771	52.1631	10.6968	22.6934	-0.013672	0.093262	-0.1333	NaN	NaN	NaN	NaN	NaN	NaN
1.084	5.961	58.806	574.8916	-0.53613	0.37305	0.015625	20.641	36.805	29.8393	0.25545	0.048091	0.1813	59.064	48.331	23.4659	-0.010986	0.099852	-0.13794	NaN	NaN	NaN	NaN	NaN	NaN
1.086	-18.851	72.335	587.104	-0.55371	0.38428	0.013184	33.263	19.3095	43.41113	0.23379	0.03998	0.18943	78.966	27.3828	45.504	-0.0039063	0.104	-0.13477	NaN	NaN	NaN	NaN	NaN	NaN
1.088	-0.0199999999999996	71.221	599.165	-0.58398	0.41113	0.011719	45.948	39.8736	28.1246	0.21698	0.041141	0.18995	69.316	58.003	31.417	0.00048828	0.11328	-0.13672	NaN	NaN	NaN	NaN	NaN	NaN
1.09	-9.778	66.8323	619.55	-0.60669	0.42822	0.011719	7.719	27.2542	11.86	0.19824	0.039551	0.19727	70.73005	14.4305	51.186	0.0063477	0.11719	-0.13623	NaN	NaN	NaN	NaN	NaN	NaN
1.092	-5.335	71.7718	628.0503	-0.6333	0.44385	0.015137	55.416	14.8548	36.13894	0.17661	0.033076	0.20166	36.79	29.542	40.212	0.022461	0.12012	-0.14063	NaN	NaN	NaN	NaN	NaN	NaN
1.094	-6.4887	72.8958	663.338	-0.66846	0.47021	0.021484	57.2456	31.325	30.52	0.15555	0.026132	0.20873	25.393	-11.2344858	39.8138	0.031739	0.12964	-0.1416	NaN	NaN	NaN	NaN	NaN	NaN
1.096	3.112	74.21751	683.951	-0.68701	0.48047	0.018555	6.307	6.912	49.629	0.12382	0.025751	0.20876	17.893	30.2359	29.284	0.040039	0.12988	-0.14648	NaN	NaN	NaN	NaN	NaN	NaN
1.098	6.022	84.9202	688.698	-0.72803	0.50879	0.024414	20.114	17.7634	57.83	0.097591	0.026518	0.2095	-0.481999999999999	11.26788	40.506	0.054688	0.13818	-0.15283	NaN	NaN	NaN	NaN	NaN	NaN
1.1	0.75	85.785	701.856	-0.76221	0.52686	0.027588	13.886	30.2891	37.3832	0.07373	0.03418	0.21143	12.82	28.0533	44.985	0.057617	0.13574	-0.14893	NaN	NaN	NaN	NaN	NaN	NaN
1.102	-2.855	83.8025	713.778	-0.79053	0.54443	0.027832	33.866	6.788	40.378	0.046003	0.035039	0.20912	-6.402	-17.6671	54.96	0.073242	0.13428	-0.15186	NaN	NaN	NaN	NaN	NaN	NaN
1.104	-2.002	81.997	725.746	-0.83789	0.56934	0.033203	12.709	29.918	22.4628	0.018705	0.041968	0.21338	-36.13	12.37	16.365	0.077148	0.13526	-0.15552	NaN	NaN	NaN	NaN	NaN	NaN
1.106	-9.106	88.499	735.225	-0.85449	0.58594	0.034668	-24.562	27.422	10.771	-0.00082003	0.044047	0.21402	-68.391	6.66809	29.9211	0.079102	0.1416	-0.15479	NaN	NaN	NaN	NaN	NaN	NaN
1.108	-3.9599	99.734	741.8265	-0.89209	0.60596	0.038086	23.048	31.394	27.9191	-0.016935	0.048593	0.20732	-45.211	54.39566	23.771	0.080566	0.14746	-0.16162	NaN	NaN	NaN	NaN	NaN	NaN
1.11	-37.8282	97.4754	762.7521	-0.91919	0.62524	0.048095	-8.826	34.568	24.5699	-0.02832	0.047363	0.20801	-49.659	27.1209	54.929	0.077148	0.14893	-0.16211	NaN	NaN	NaN	NaN	NaN	NaN
1.112	-13.1461	104.3679	787.57	-0.94531	0.64258	0.050293	-29.317	11.834	39.162	-0.031241	0.048537	0.2013	-43.072	42.15615	49.594	0.063477	0.15283	-0.16602	NaN	NaN	NaN	NaN	NaN	NaN
1.114	-22.06	106.4917	794.522	-0.97705	0.65869	0.054199	2.461	21.0781	60.204	-0.026841	0.058671	0.19322	-57.0649	-0.7153	41.738	0.053955	0.15649	-0.16259	NaN	NaN	NaN	NaN	NaN	NaN
1.116	-50.1049	117.655	809.588	-0.98779	0.6626	0.060547	-32.392	30.1433	38.37666	-0.022289	0.062184	0.18947	-47.036	10.67	49.2585	0.038086	0.16357	-0.16455	NaN	NaN	NaN	NaN	NaN	NaN
1.118	-35.5035	102.072	825.824	-1.0112	0.68408	0.065918	12.273	13.884	49.367	-0.01418	0.068403	0.18635	-55.0022	-36.0948	95.778	0.0073242	0.18066	-0.1748	NaN	NaN	NaN	NaN	NaN	NaN
1.12	-35.8798	95.73	822.91	-1.0222	0.69214	0.063232	-6.261	29.8115	32.793	-0.0019531	0.074219	0.18115	-47.068	-21.486	96.6942	-0.013672	0.1875	-0.17383	NaN	NaN	NaN	NaN	NaN	NaN
1.122	-28.4262	105.5	828.7104	-1.0288	0.69971	0.0625	-61.0577	28.5558	21.5581	0.0094692	0.086981	0.17485	-49.351	-26.5708	130.324	-0.075195	0.20898	-0.17969	NaN	NaN	NaN	NaN	NaN	NaN
1.124	-51.3061	120.406	844.766	-1.0352	0.70703	0.068848	1.513	20.2048	40.766	0.025464	0.098514	0.17357	11.77	26.246	159.145	-0.13794	0.22559	-0.17578	NaN	NaN	NaN	NaN	NaN	NaN
1.126	-24.0394	121.359	851.1381	-1.0332	0.71094	0.071777	-1.791	31.766	31.8621	0.046793	0.1094	0.16817	45.444	24.9389	213.033	-0.20898	0.25146	-0.18018	NaN	NaN	NaN	NaN	NaN	NaN
1.128	-26.113	118.007	866.997	-1.0303	0.71875	0.071777	-19.355	-3.6848	51.926	0.065824	0.12073	0.16852	34.944	37.6416	284.9558	-0.32764	0.27637	-0.18945	NaN	NaN	NaN	NaN	NaN	NaN
1.13	-27.5988	127.438	868.9034	-1.0278	0.7251	0.066162	26.614	1.4204	70.822	0.072266	0.1333	0.17236	24.082	10.175	334.757	-0.38135	0.28809	-0.18506	NaN	NaN	NaN	NaN	NaN	NaN
1.132	-39.82018	125.6523	893.451	-1.0195	0.72656	0.065918	-8.23	6.6022	61.188	0.084305	0.14044	0.16836	11.19	30.9469	416.3727	-0.50586	0.30664	-0.19238	NaN	NaN	NaN	NaN	NaN	NaN
1.134	-24.849	138.656	901.655	-1.0093	0.73779	0.061523	-7.956	-4.386	53.264	0.092672	0.14948	0.16536	6.2287	71.2508	537.516	-0.61718	0.33276	-0.20191	NaN	NaN	NaN	NaN	NaN	NaN
1.136	-8.762	146.415	907.01	-1.0117	0.73828	0.060059	53.012	27.419	31.53429	0.095824	0.16155	0.16767	26.9264	109.517	632.412	-0.73047	0.36328	-0.20703	NaN	NaN	NaN	NaN	NaN	NaN
1.138	-5.263	149.097	887.673	-1.0083	0.74268	0.060547	-3.964	10.521	33.177	0.096978	0.17033	0.16971	37.7795	123.042	703.269	-0.87354	0.39941	-0.21924	NaN	NaN	NaN	NaN	NaN	NaN
1.14	1.358	145.521	902.607	-1.0202	0.7478	0.053711	32.226	6.0794	41.4983	0.094238	0.17871	0.16064	18.5009	109.462	747.5011	-0.96631	0.42188	-0.21631	NaN	NaN	NaN	NaN	NaN	NaN
1.142	5.484	149.46	918.704	-1.0308	0.76025	0.050781	45.6	30.6255	16.4694	0.10224	0.18398	0.16329	-21.3641	80.2356	801.698	-1.1499	0.48779	-0.22021	NaN	NaN	NaN	NaN	NaN	NaN
1.144	14.065	165.689	918.172	-1.0474	0.77002	0.052246	24.906	8.8147	28.757	0.10029	0.18807	0.16006	6.56862	49.34	915.8882	-1.3452	0.5376	-0.19092	NaN	NaN	NaN	NaN	NaN	NaN
1.146	14.183	166.038	924.5109	-1.0679	0.77588	0.051758	60.2728	10.21704	66.729	0.10342	0.19668	0.14952	-26.064	17.222187	1018.338	-1.4487	0.55811	-0.16943	NaN	NaN	NaN	NaN	NaN	NaN
1.148	8.746	165.403	935.396	-1.0854	0.79932	0.051758	18.018	6.0321	59.323	0.10107	0.2037	0.14883	-11.732	-8.274	1094.722	-1.687	0.60205	-0.11816	NaN	NaN	NaN	NaN	NaN	NaN
1.15	13.028	163.1786	945.239	-1.1088	0.81152	0.052246	26.327	-14.79968	68.816	0.10205	0.21729	0.14795	-4.355	-55.9173	1112.988	-1.8797	0.6189	-0.074707	NaN	NaN	NaN	NaN	NaN	NaN
1.152	14.715	172.043	938.081	-1.1318	0.82227	0.049805	47.587	-3.2695	47.164	0.098926	0.22559	0.14326	5.286	-116.838	1117.71	-2.0464	0.6499	0.0058594	NaN	NaN	NaN	NaN	NaN	NaN
1.154	26.0271	170.284	929.467	-1.1602	0.8418	0.047852	11.286	-10.821	38.3337	0.095898	0.23585	0.1375	-43.3054	-161.6997	1110.747	-2.3145	0.68359	0.04248	NaN	NaN	NaN	NaN	NaN	NaN
1.156	3.764	170.098	938.14	-1.1719	0.84961	0.049316	22.671	-30.85916	66.97953	0.090427	0.246	0.13359	-65.8249	-181.3727	1131.031	-2.4214	0.70947	0.041992	NaN	NaN	NaN	NaN	NaN	NaN
1.158	18.245	165.9815	940.775	-1.1929	0.87158	0.046875	-12.227	-17.35	66.2492	0.087402	0.25596	0.13066	-70.9769	-161.8722	1128.924	-2.5664	0.79688	0.014648	NaN	NaN	NaN	NaN	NaN	NaN
1.16	4.933	169.8881	944.826	-1.2105	0.88233	0.045898	-13.625	-39.107	89.2848	0.072754	0.27295	0.12354	-57.1035	-145.2786	1142.778	-2.5828	0.87719	0.013916	NaN	NaN	NaN	NaN	NaN	NaN
1.162	-9.959	175.419	964.9	-1.2207	0.89453	0.043945	25.773	-44.357	119.014	0.062306	0.27929	0.12509	-87.678	-132.212535	1104.037	-2.5405	0.96631	0.02002	NaN	NaN	NaN	NaN	NaN	NaN
1.164	-9.838	177.0862	977.995	-1.2285	0.91211	0.035645	-38.157	-51.5497	139.748	0.040823	0.29239	0.11621	-116.747	-151.088	1092.23	-2.3862	1.0405	0.00048828	NaN	NaN	NaN	NaN	NaN	NaN
1.166	-9.502	190.436	999.392	-1.2319	0.92236	0.034668	-26.938	-58.487	214.142	0.013869	0.30019	0.11621	-147.561	-131.455	1057.6888	-2.2437	1.0356	-0.0092773	NaN	NaN	NaN	NaN	NaN	NaN
1.168	-22.1157	216.978	1006.498	-1.2324	0.92969	0.022461	-21.488	-10.53422	253.633	-0.017675	0.30957	0.11113	-145.901	-97.6186	1072.3525	-1.8711	0.93164	-0.060547	NaN	NaN	NaN	NaN	NaN	NaN
1.17	-61.9	256.073	1030.286	-1.2348	0.93994	0.016602	-65.387	19.1948	296.5815	-0.056641	0.31494	0.11182	-134.963	-53.083	1089.793	-1.5905	0.81762	-0.12232	NaN	NaN	NaN	NaN	NaN	NaN
1.172	-53.279	273.008	1063.562	-1.2451	0.94531	0.0068359	-1.374	24.7832	392.4724	-0.097948	0.32383	0.11221	-133.208	-47.221	1120.273	-1.3354	0.68018	-0.16357	NaN	NaN	NaN	NaN	NaN	NaN
1.174	-54.582	291.894	1087.448	-1.269	0.96143	-0.00048828	-31.853	64.2163	474.822	-0.13486	0.33848	0.11123	-97.063	-74.934	1102.723	-1.0752	0.56543	-0.17188	NaN	NaN	NaN	NaN	NaN	NaN
1.176	-70.053	293.66	1116.7615	-1.2969	0.9707	-0.0019531	-52.251	74.897	586.763	-0.17861	0.35254	0.10693	-77.198	-121.803	1122.505	-0.96875	0.55957	-0.16309	NaN	NaN	NaN	NaN	NaN	NaN
1.178	-96.982	303.912	1160.432	-1.3496	0.99219	-0.00048828	39.418	111.281	712.2999	-0.23291	0.36572	0.10605	-36.149	-159.565	1134.114	-0.98584	0.67432	-0.20654	NaN	NaN	NaN	NaN	NaN	NaN
1.18	-82.873	318.816	1185.267	-1.4119	1.0144	-0.0024414	-5.486	131.45	813.47433	-0.29883	0.38086	0.097656	-32.641	-200.137	1197.292	-1.0918	0.77051	-0.25854	NaN	NaN	NaN	NaN	NaN	NaN
1.182	-92.483	332.376	1191.283	-1.4727	1.0381	-0.0078125	-2.792	81.963	922.305	-0.37881	0.39072	0.097656	-9.428	-226.808	1240.398	-1.1558	0.8335	-0.2749	NaN	NaN	NaN	NaN	NaN	NaN
1.184	-86.185	330.134	1160.7658	-1.5679	1.0718	-0.003418	19.42	64.936	989.502	-0.47431	0.39893	0.096387	10.157	-274.49	1301.162	-1.1738	0.86914	-0.27539	NaN	NaN	NaN	NaN	NaN	NaN
1.186	-79.288	301.367	1169.724	-1.6069	1.0923	0.00097656	-11.706	21.383	1023.156	-0.59775	0.39854	0.087403	38.549	-303.673	1325.718	-1.2056	0.87842	-0.28906	NaN	NaN	NaN	NaN	NaN	NaN
1.188	-74.304	269.3673	1170.706	-1.6895	1.1172	0.0014648	51.345	-28.793	1066.608	-0.73603	0.40371	0.10059	42.60958	-316.737	1374.004	-1.2793	0.89355	-0.28076	NaN	NaN	NaN	NaN	NaN	NaN
1.19	-72.566	252.184	1171.231	-1.7342	1.137	0.0012208	57.069	-59.334	1074.949	-0.89258	0.41504	0.11768	50.884	-292.283	1420.543	-1.3535	0.90088	-0.25098	NaN	NaN	NaN	NaN	NaN	NaN
1.192	-84.649	235.2978	1147.616	-1.7573	1.1528	-0.00097656	44.485	-126.518	1072.861	-1.0904	0.41777	0.11904	-8.616	-261.856	1488.094	-1.4331	0.90869	-0.22168	NaN	NaN	NaN	NaN	NaN	NaN
1.194	-76.537	218.0821	1156.357	-1.7534	1.1587	-0.01123	91.687	-167.231	1068.554	-1.312	0.4167	0.11748	4.915	-213.5082	1518.72	-1.5405	0.92822	-0.20752	NaN	NaN	NaN	NaN	NaN	NaN
1.196	-73.702	208.3601	1156.597	-1.7319	1.1606	-0.019043	90.749	-163.056	1036.988	-1.5343	0.43506	0.11826	3.412	-204.461	1544.103	-1.5854	0.91846	-0.21729	NaN	NaN	NaN	NaN	NaN	NaN
1.198	-57.597	197.2877	1136.002	-1.6504	1.1426	-0.039063	127.8171	-179.579	1036.089	-1.755	0.46738	0.11894	62.1064	-161.4227	1585.533	-1.6914	0.92383	-0.23438	NaN	NaN	NaN	NaN	NaN	NaN
1.2	-53.038	185.205	1123.9637	-1.5513	1.1211	-0.046875	143	-137.448	1027.312	-1.9565	0.51221	0.12207	43.7073	-171.979	1605.945	-1.7715	0.94336	-0.24292	NaN	NaN	NaN	NaN	NaN	NaN
1.202	-77.065	174.25852	1113.2913	-1.4395	1.0908	-0.051758	107.851	-92.054	977.719	-2.1194	0.55918	0.12969	65.8178	-121.228	1595.146	-1.8613	0.95898	-0.25	NaN	NaN	NaN	NaN	NaN	NaN
1.204	-60.223	171.9925	1123.146	-1.3008	1.0391	-0.067383	156.4689	-84.845	975.741	-2.2286	0.61856	0.12432	19.471	-118.355	1581.716	-1.9702	0.97705	-0.26318	NaN	NaN	NaN	NaN	NaN	NaN
1.206	-63.353	165.823	1116.715	-1.2305	1.0215	-0.071777	125.0201	-35.259	949.79	-2.2551	0.67402	0.11651	17.471	-63.224	1578.6917	-2.021	0.9751	-0.26611	NaN	NaN	NaN	NaN	NaN	NaN
1.208	-50.3279	151.544	1114.576	-1.1167	0.97705	-0.089844	67.742	-21.692	973.323	-2.2083	0.75635	0.10596	-29.9136	-83.708	1611.8398	-2.105	0.96338	-0.28174	NaN	NaN	NaN	NaN	NaN	NaN
1.21	-55.068	134.6306	1117.683	-1.021	0.95557	-0.095215	115.2526	-17.028	980.108	-2.0859	0.8457	0.096191	2.524	-67.082	1640.993	-2.1502	0.97192	-0.29614	NaN	NaN	NaN	NaN	NaN	NaN
1.212	-60.815	136.136	1109.569	-0.99561	0.94141	-0.10498	68.235	10.789	956.109	-1.908	0.90664	0.082422	-20.897	-107.3639	1658.511	-2.1909	0.97314	-0.31543	NaN	NaN	NaN	NaN	NaN	NaN
1.214	-54.205	135.985	1102.1688	-0.95508	0.9375	-0.11475	54.7527	-37.35	953.6218	-1.7069	0.93603	0.06377	-29.749	-80.9247	1680.535	-2.23	0.96533	-0.32471	NaN	NaN	NaN	NaN	NaN	NaN
1.216	-65.088	133.157	1096.7694	-0.93701	0.93262	-0.1145	39.842	-84.194	952.4395	-1.5003	0.91377	0.042676	-121.125	-107.286	1699.907	-2.2397	0.96143	-0.32959	NaN	NaN	NaN	NaN	NaN	NaN
1.218	-60.798	126.3654	1089.5278	-0.92334	0.93213	-0.12207	-22.7479	-132.564	955.448	-1.3063	0.84648	0.017285	-116.583	-65.6734	1725.175	-2.252	0.95703	-0.34375	NaN	NaN	NaN	NaN	NaN	NaN
1.22	-60.77	116.2174	1082.727	-0.9165	0.92627	-0.12207	-2.697	-219.987	1025.612	-1.1211	0.77539	-0.015137	-109.489	-103.9	1756.766	-2.2498	0.95923	-0.35327	NaN	NaN	NaN	NaN	NaN	NaN
1.222	-60.685	103.416	1065.707	-0.91748	0.91846	-0.11963	-25.425	-240.437	1050.424	-0.95158	0.70605	-0.039356	-55.474	-83.56	1778.343	-2.2476	0.94971	-0.36279	NaN	NaN	NaN	NaN	NaN	NaN
1.224	-59.583	84.147	1064.732	-0.92383	0.90918	-0.12549	-91.46	-259.981	1050.4343	-0.81758	0.65957	-0.065918	-55.7957	-128.938	1789.971	-2.2222	0.9458	-0.37891	NaN	NaN	NaN	NaN	NaN	NaN
1.226	-37.7098	73.487	1056.118	-0.93213	0.9043	-0.1311	-60.604	-288.945	1101.254	-0.71641	0.64668	-0.078809	-47.476	-91.3379	1778.251	-2.2046	0.93994	-0.3833	NaN	NaN	NaN	NaN	NaN	NaN
1.228	-39.9375	58.7123	1053.818	-0.93311	0.89697	-0.13135	-94.953	-234.537	1129.046	-0.67002	0.68057	-0.086133	-49.8058	-85.874	1760.646	-2.1753	0.91064	-0.37646	NaN	NaN	NaN	NaN	NaN	NaN
1.23	-58.29954	55.402	1032.948	-0.92773	0.88477	-0.13525	-108.734	-232.636	1182.754	-0.68311	0.74658	-0.10303	-47.051	-32.345	1730.262	-2.1561	0.87769	-0.37768	NaN	NaN	NaN	NaN	NaN	NaN
1.232	-15.603	35.741	1018.188	-0.91064	0.87939	-0.14014	-76.109	-188.242	1216.585	-0.68955	0.78623	-0.11172	-30.72	-28.495	1699.297	-2.1465	0.86035	-0.37695	NaN	NaN	NaN	NaN	NaN	NaN
1.234	-6.8	16.6566	990.533	-0.88525	0.87842	-0.15186	-116.059	-106.79	1220.6219	-0.6834	0.7832	-0.10772	-30.216	3.955	1682.6612	-2.1426	0.83203	-0.36328	NaN	NaN	NaN	NaN	NaN	NaN
1.236	8.1	5.816	958.883	-0.85645	0.87353	-0.15967	-67.399	-129.232	1277.164	-0.70644	0.74922	-0.10108	-2.313	-3.753	1682.298	-2.1426	0.82813	-0.35645	NaN	NaN	NaN	NaN	NaN	NaN
1.238	5.588	-16.131	940.9145	-0.82275	0.87354	-0.1709	-75.362	-75.658	1269.866	-0.78887	0.73145	-0.085645	-6.954	22.0928	1692.023	-2.1558	0.81396	-0.34033	NaN	NaN	NaN	NaN	NaN	NaN
1.24	32.407	-30.641	950.799	-0.77686	0.86768	-0.18115	-86.549	-56.048	1235.208	-0.90527	0.72949	-0.077637	-7.453	30.251	1687.4864	-2.1756	0.80982	-0.3396	NaN	NaN	NaN	NaN	NaN	NaN
1.242	34.103	-54.217	963.839	-0.75244	0.86328	-0.18945	-9.6938	-81.056	1254.0029	-1.0267	0.73974	-0.074805	-8.208	67.989	1693.0837	-2.1836	0.7998	-0.33154	NaN	NaN	NaN	NaN	NaN	NaN
1.244	44.791	-61.193	956.576	-0.70361	0.85986	-0.21191	-59.752	-31.855	1270.291	-1.1472	0.74951	-0.067578	45.251	49.3342	1679.9239	-2.1968	0.78467	-0.28662	NaN	NaN	NaN	NaN	NaN	NaN
1.246	50.801	-83.9483	967.299	-0.68506	0.86255	-0.22413	-65.677	-72.537	1303.935	-1.255	0.76279	-0.067188	43.273	65.4775	1658.948	-2.2129	0.78711	-0.28271	NaN	NaN	NaN	NaN	NaN	NaN
1.248	80.001	-93.073946	963.985	-0.66162	0.86768	-0.23779	-14.887	-101.484	1331.2066	-1.3376	0.76826	-0.063184	84.619	58.602	1618.6027	-2.2065	0.80518	-0.27686	NaN	NaN	NaN	NaN	NaN	NaN
1.25	90.182	-98.39761	954.112	-0.65283	0.87354	-0.25928	-41.7915	-72.7622	1340.6565	-1.4063	0.77734	-0.064453	60.8824	58.7022	1631.462	-2.2065	0.80029	-0.29931	NaN	NaN	NaN	NaN	NaN	NaN
1.252	39.797	-92.579	941.7749	-0.64844	0.88086	-0.26758	10.067	-144.403	1418.616	-1.4664	0.78047	-0.067773	75.8736	43.548	1640.1885	-2.1914	0.77246	-0.31006	NaN	NaN	NaN	NaN	NaN	NaN
1.254	76.838	-108.981	941.301	-0.64844	0.88477	-0.28271	29.401	-127.793	1435.86	-1.5215	0.78594	-0.063769	47.117	17.332	1670.767	-2.168	0.75195	-0.31055	NaN	NaN	NaN	NaN	NaN	NaN
1.256	79.32	-131.747	964.098	-0.66064	0.89453	-0.28784	7.86	-121.351	1421.54	-1.5821	0.7918	-0.059863	70.6015	10.288	1635.161	-2.1621	0.74805	-0.31055	NaN	NaN	NaN	NaN	NaN	NaN
1.258	96.0736	-153.2142	961.04	-0.68115	0.90869	-0.29443	67.5877	-156.071	1480.082	-1.6426	0.79766	-0.0625	49.828	16.973	1628.621	-2.1328	0.75	-0.30371	NaN	NaN	NaN	NaN	NaN	NaN
1.26	83.204	-160.24006	956.723	-0.70557	0.92236	-0.29932	39.776	-92.2268	1505.161	-1.7051	0.80518	-0.073242	51.322	48.1589	1576.461	-2.1023	0.75122	-0.30298	NaN	NaN	NaN	NaN	NaN	NaN
1.262	65.927	-148.212	955.964	-0.72656	0.93066	-0.30664	47.314	-119.461403	1524.762	-1.7632	0.81768	-0.07666	7.592	91.9304	1563.477	-2.0605	0.74414	-0.30176	NaN	NaN	NaN	NaN	NaN	NaN
1.264	74.526	-142.80205	959.863	-0.7666	0.95215	-0.30469	89.059	-133.588	1545.242	-1.8199	0.82588	-0.075781	21.434	136.736	1507.9188	-2.0059	0.73047	-0.30664	NaN	NaN	NaN	NaN	NaN	NaN
1.266	49.115	-131.4445	942.816	-0.79175	0.95826	-0.30273	40.014	-57.26	1512.449	-1.8608	0.83799	-0.075391	-27.611	140.443	1528.063	-1.9648	0.71875	-0.2998	NaN	NaN	NaN	NaN	NaN	NaN
1.268	64.975	-136.797	931.405	-0.82617	0.9707	-0.30664	21.663	-86.5594	1525.523	-1.9023	0.83955	-0.078515	-30.651	161.006	1495.5746	-1.9111	0.69336	-0.29639	NaN	NaN	NaN	NaN	NaN	NaN
1.27	51.443	-146.036	951.129	-0.86523	0.98438	-0.30469	11.025	-27.461	1509.588	-1.9375	0.84375	-0.073242	-35.797	148.627	1510.326	-1.8689	0.67749	-0.29712	NaN	NaN	NaN	NaN	NaN	NaN
1.272	67.349	-150.727	975.705	-0.88477	0.99219	-0.29785	-17.3665	10.891	1484.3	-1.9637	0.84453	-0.068164	-9.108	191.395	1448.189	-1.8125	0.66016	-0.28711	NaN	NaN	NaN	NaN	NaN	NaN
1.274	53.303	-153.727	994.551	-0.92334	1.0024	-0.2998	13.125	-31.4722	1507.6056	-1.9886	0.84492	-0.060742	-52.6848	202.255	1439.057	-1.7554	0.64209	-0.28271	NaN	NaN	NaN	NaN	NaN	NaN
1.276	31.522	-154.333	987.762	-0.94434	1.0088	-0.29223	-32.399	25.9845	1497.9666	-2.0125	0.85235	-0.055664	-74.4997	228.694	1384.1717	-1.7241	0.62842	-0.27051	NaN	NaN	NaN	NaN	NaN	NaN
1.278	46.464	-155.782	999.133	-0.96484	1.0166	-0.2959	-60.6185	0.7575	1507.2451	-2.0311	0.85127	-0.049512	-81.2946	211.399	1363.2875	-1.6719	0.59766	-0.25	NaN	NaN	NaN	NaN	NaN	NaN
1.28	37.873	-141.164	994.022	-0.98193	1.022	-0.28857	-43.9676	10.9905	1535.54	-2.0527	0.84521	-0.044434	-61.26	225.426	1309.7393	-1.6316	0.57739	-0.24121	NaN	NaN	NaN	NaN	NaN	NaN
1.282	68.587	-136.612	991.125	-0.99121	1.0273	-0.29102	-76.997	78.527	1528.972	-2.0773	0.85235	-0.040723	-48.181	202.7315	1307.424	-1.5874	0.56104	-0.23975	NaN	NaN	NaN	NaN	NaN	NaN
1.284	47.608	-143.845	997.825	-0.99951	1.0229	-0.29834	-56.001	3.026	1548.195	-2.0863	0.85762	-0.034375	-47.999	217.132	1270.1841	-1.5332	0.53711	-0.22266	NaN	NaN	NaN	NaN	NaN	NaN
1.286	60.34	-157.8359	1019.259	-0.99953	1.023	-0.29858	-33.5195	19.078	1568.98	-2.0844	0.85488	-0.040234	-40.0456	203.107	1286.377	-1.49	0.52124	-0.20923	NaN	NaN	NaN	NaN	NaN	NaN
1.288	53.218	-173.5784	1038.215	-1.0005	1.022	-0.29492	-82.989	0.283000000000001	1567.05	-2.0732	0.8461	-0.02207	-41.151	231.646	1230.669	-1.4316	0.50195	-0.19873	NaN	NaN	NaN	NaN	NaN	NaN
1.29	49.435	-176.3279	1037.035	-0.99609	1.0156	-0.2998	-57.231	-68.7898	1593.804	-2.0449	0.83105	-0.021484	-33.448	221.7375	1221.067	-1.3828	0.4707	-0.18213	NaN	NaN	NaN	NaN	NaN	NaN
1.292	46.78	-169.5717	1033.846	-0.99414	1.0156	-0.30762	-61.6946	-16.7284	1581.219	-2.0128	0.81806	-0.024707	-8.763	240.922	1175.638	-1.3516	0.46484	-0.17236	NaN	NaN	NaN	NaN	NaN	NaN
1.294	64.174	-153.4256	1036.06	-0.98779	1.0054	-0.30957	-96.974	-47.532	1559.127	-1.9753	0.79424	-0.013672	-14.415	225.0241	1131.688	-1.2979	0.43506	-0.1665	NaN	NaN	NaN	NaN	NaN	NaN
1.296	68.652	-133.23807	1015.485	-0.98389	1.0005	-0.31884	-44.72135	-45.3069	1561.731	-1.955	0.76611	0.0054687	25.7405	252.376	1082.315	-1.2536	0.41796	-0.1477	NaN	NaN	NaN	NaN	NaN	NaN
1.298	60.548	-124.89	1005.335	-0.98047	1	-0.32178	-49.6034	27.74623	1508.456	-1.9528	0.7581	0.026953	39.0822	248.7867	1037.637	-1.2109	0.40625	-0.12988	NaN	NaN	NaN	NaN	NaN	NaN
1.3	76.607	-125.601	1009.765	-0.97461	0.99316	-0.33203	-33.0418	-22.3053	1499.477	-1.9604	0.77979	0.038574	6.59	274.529	1018.5214	-1.1577	0.38574	-0.1167	NaN	NaN	NaN	NaN	NaN	NaN
1.302	91.212	-130.0975	1025.254	-0.98242	0.99023	-0.33594	-12.048	34.76335	1495.412	-1.9801	0.7961	0.027246	22.802	249.455	983.804	-1.1255	0.37842	-0.1123	NaN	NaN	NaN	NaN	NaN	NaN
1.304	98.1786	-126.15	1035.526	-0.98633	0.98242	-0.33936	-41.996	67.514	1475.74	-1.9485	0.80117	0.021973	37.795	249.57	941.36192	-1.062	0.36768	-0.097656	NaN	NaN	NaN	NaN	NaN	NaN
1.306	89.643	-127.4281	1022.844	-0.99928	0.98315	-0.34253	13.222	29.6267	1482.174	-1.9012	0.78985	0.025489	44.686	246.5396	888.5757	-1.0149	0.34839	-0.077149	NaN	NaN	NaN	NaN	NaN	NaN
1.308	82.5552	-120.1193	1014.844	-1.0195	0.97461	-0.34375	31.1487	112.109	1449.3283	-1.894	0.78359	0.034473	24.2007	254.481	868.237	-0.97266	0.33496	-0.07373	NaN	NaN	NaN	NaN	NaN	NaN
1.31	90.063	-116.2548	999.3	-1.0332	0.9668	-0.34766	16.8831	88.32	1429.0762	-1.9155	0.77979	0.055176	22.6057	260.3259	824.48	-0.91504	0.32129	-0.053711	NaN	NaN	NaN	NaN	NaN	NaN
1.312	72.813	-108.1844	979.0645	-1.0415	0.96924	-0.34912	44.7927	84.2335	1438.431	-1.9426	0.79258	0.062793	-19.917	268.923	787.059	-0.88867	0.30811	-0.045898	NaN	NaN	NaN	NaN	NaN	NaN
1.314	67.51	-104.6002	982.551	-1.0444	0.95947	-0.3501	16.8583	149.649	1396.8194	-1.9374	0.80283	0.070215	-7.17899999999999	249.862	713.4913	-0.81836	0.2959	-0.032227	NaN	NaN	NaN	NaN	NaN	NaN
1.316	51.362	-108.4177	989.007	-1.0476	0.95484	-0.34863	41.0326	81.2727	1388.437	-1.9015	0.79971	0.072558	-22.442	244.232	695.449	-0.78076	0.28198	-0.012939	NaN	NaN	NaN	NaN	NaN	NaN
1.318	63.633	-114.349	996.45	-1.0391	0.9541	-0.35254	37.9417	88.1574	1392.763	-1.8645	0.79238	0.080371	-22.71	234.757	640.5219	-0.7334	0.26904	-0.003418	NaN	NaN	NaN	NaN	NaN	NaN
1.32	59.866	-119.791	984.065	-1.0259	0.93896	-0.34814	-15.329	69.1199	1370.416	-1.8315	0.77393	0.087402	-59.842	233.402	623.42	-0.66797	0.26807	0.010254	NaN	NaN	NaN	NaN	NaN	NaN
1.322	46.106	-121.9109	968.9352	-1.0195	0.92969	-0.35059	21.449	5.033	1364.266	-1.7978	0.75645	0.08711	-27.126	236.234	575.782	-0.63721	0.25439	0.015625	NaN	NaN	NaN	NaN	NaN	NaN
1.324	40.163	-111.0936	965.142	-1.0029	0.91602	-0.3418	14.093	70.358	1311.1779	-1.7664	0.7414	0.091016	-43.8869	217.403	573.122	-0.5625	0.24512	0.031738	NaN	NaN	NaN	NaN	NaN	NaN
1.326	29.396	-91.0021	948.773	-0.99243	0.90649	-0.33935	-0.645	58.322	1291.42	-1.7398	0.72656	0.092969	-46.97	204.797	502.5359	-0.50757	0.23364	0.037842	NaN	NaN	NaN	NaN	NaN	NaN
1.328	37.735	-74.838	922.07039	-0.97852	0.89648	-0.33105	-2.136	79.069	1295.233	-1.7143	0.71641	0.097656	-64.496	193.05	482.064	-0.44775	0.22705	0.043457	NaN	NaN	NaN	NaN	NaN	NaN
1.33	1.78	-73.063	901.0069	-0.96631	0.88623	-0.32178	-22.846	145.501	1271.2298	-1.6792	0.71533	0.097656	-46.476	193.663	386.506	-0.36816	0.20654	0.057129	NaN	NaN	NaN	NaN	NaN	NaN
1.332	29.093	-72.931	901.19	-0.95313	0.87402	-0.31836	7.716	103.4438	1263.6369	-1.6566	0.69433	0.1	-48.1697	179.744	392.526	-0.32227	0.20264	0.05127	NaN	NaN	NaN	NaN	NaN	NaN
1.334	22.093	-65.846	908.864	-0.93896	0.86182	-0.30371	-3.85400000000001	160.479	1267.83	-1.6285	0.67617	0.10176	-71.4487	180.688	343.299	-0.23633	0.18408	0.056152	NaN	NaN	NaN	NaN	NaN	NaN
1.336	21.201	-54.419	892.336	-0.92261	0.85083	-0.2998	-51.0303	200.837	1245.499	-1.5957	0.66367	0.10176	-70.496	151.5768	331.332	-0.16577	0.17432	0.055908	NaN	NaN	NaN	NaN	NaN	NaN
1.338	-16.495	-70.5993	880.713	-0.90381	0.83643	-0.28955	-17.646	164.934	1221.317	-1.5687	0.64844	0.10068	-58.3037	162.085	273.0305	-0.09668	0.1582	0.058594	NaN	NaN	NaN	NaN	NaN	NaN
1.34	-1.215	-60.9959	859.0826	-0.88965	0.81445	-0.28418	-37.109	233.291	1163.476	-1.5425	0.62744	0.10693	-50.5769	132.71023	261.1915	-0.0083008	0.15332	0.056641	NaN	NaN	NaN	NaN	NaN	NaN
1.342	24.917	-63.712	832.9006	-0.87695	0.80371	-0.27344	-60.566	199.216	1114.891	-1.515	0.61201	0.10986	-37.79	146.209	205.72	0.037598	0.14258	0.057617	NaN	NaN	NaN	NaN	NaN	NaN
1.344	17.899	-48.976	806.8856	-0.84961	0.78516	-0.26758	-37.547	179.45752	1108.378	-1.4903	0.59903	0.10948	-39.884	126.8467	235.191	0.11963	0.12744	0.0625	NaN	NaN	NaN	NaN	NaN	NaN
1.346	38.818	-53.459	805.032	-0.83105	0.77441	-0.25537	-59.9677	218.853	1077.3709	-1.4668	0.59121	0.11299	21.997	152.493	194.15	0.16406	0.11206	0.059814	NaN	NaN	NaN	NaN	NaN	NaN
1.348	28.5	-56.418	794.568	-0.81396	0.75928	-0.25049	-38.8	160.6483	1065.628	-1.4371	0.58086	0.1166	17.639	112.105	177.86	0.20996	0.09375	0.062012	NaN	NaN	NaN	NaN	NaN	NaN
1.35	50.472	-60.077	785.803	-0.78516	0.73242	-0.24365	-14.71	195.926	1058.472	-1.4058	0.57373	0.12061	41.298	102.756	158.124	0.27197	0.077148	0.069824	NaN	NaN	NaN	NaN	NaN	NaN
1.352	36.447	-70.453	764.245	-0.76171	0.7163	-0.23633	-36.2373	207.749	1047.976	-1.3773	0.5667	0.12021	18.129	53.722	155.36	0.29541	0.07373	0.069336	NaN	NaN	NaN	NaN	NaN	NaN
1.354	44.361	-73.2891	757.5065	-0.74219	0.7002	-0.22656	2.52	149.82514	1043.319	-1.3407	0.55224	0.11758	48.971	71.156	124.8358	0.33545	0.060059	0.077148	NaN	NaN	NaN	NaN	NaN	NaN
1.356	66.975	-49.9077	743.4492	-0.70654	0.68115	-0.21875	10.302	198.333	1006.844	-1.3122	0.54404	0.11992	33.255	63.3974	138.523	0.35816	0.045166	0.085694	NaN	NaN	NaN	NaN	NaN	NaN
1.358	65.372	-35.7282	718.198	-0.69141	0.66992	-0.21484	9.638	170.405	974.936	-1.2777	0.52871	0.11563	51.6667	80.518	109.4967	0.37061	0.038086	0.085938	NaN	NaN	NaN	NaN	NaN	NaN
1.36	72.639	-25.8358	691.105	-0.66357	0.64502	-0.20264	58.1328	172.269	957.41	-1.2437	0.51318	0.11572	45.601	34.788	135.564	0.37939	0.030273	0.099609	NaN	NaN	NaN	NaN	NaN	NaN
1.362	50.608	-18.821	682.823	-0.64209	0.62793	-0.19604	1.76600000000001	221.147	922.784	-1.2067	0.50322	0.11192	40.722	27.14	96.744	0.37744	0.027344	0.10498	NaN	NaN	NaN	NaN	NaN	NaN
1.364	66.818	-21.442	671.772	-0.61768	0.6167	-0.19385	16.483	170.9171	895.115	-1.173	0.48652	0.11035	9.941	-1.049	86.504	0.36572	0.0024414	0.11719	NaN	NaN	NaN	NaN	NaN	NaN
1.366	51.322	-15.448	665.158	-0.59277	0.59375	-0.18457	73.3909	197.975	855.293	-1.134	0.47871	0.10996	40.682	37.7487	52.708	0.34253	-0.0058594	0.12475	NaN	NaN	NaN	NaN	NaN	NaN
1.368	58.99	-15.077	662.337	-0.57666	0.58105	-0.18018	40.7852	199.925	821.535	-1.097	0.46191	0.1085	25.123	26.7691	53.367	0.32373	-0.013184	0.13281	NaN	NaN	NaN	NaN	NaN	NaN
1.37	53.833	-19.8471	654.165	-0.54932	0.56494	-0.16797	51.79	149.861	806.635	-1.0562	0.45166	0.10498	3.036	51.992	57.954	0.29248	-0.01709	0.13623	NaN	NaN	NaN	NaN	NaN	NaN
1.372	44.233	-6.7936	601.3564	-0.52979	0.55127	-0.16065	35.261	210.806	750.34	-1.0216	0.43428	0.099218	-1.86000000000001	26.0703	39.271	0.28271	-0.020996	0.13525	NaN	NaN	NaN	NaN	NaN	NaN
1.374	66.217	-2.647	591.3025	-0.51367	0.53711	-0.15527	36.343	193.63	706.159	-0.98535	0.4207	0.097266	-18.906	45.0826	16.8241	0.25732	-0.021973	0.1543	NaN	NaN	NaN	NaN	NaN	NaN
1.376	30.612	1.237	568.0979	-0.48828	0.51855	-0.14258	66.5329	191.0346	667.5783	-0.94785	0.40898	0.092578	-33.688	13.4771	22.61781	0.23511	-0.028564	0.16919	NaN	NaN	NaN	NaN	NaN	NaN
1.378	38.243	-2.491	571.535	-0.48047	0.51172	-0.13428	8.862	213.879	622.205394	-0.90976	0.39434	0.089844	-34.664	41.1418	26.7937	0.20801	-0.031738	0.17529	NaN	NaN	NaN	NaN	NaN	NaN
1.38	24.818	-3.231	571.15	-0.45654	0.48877	-0.125	25.798	161.2524	614.161	-0.87354	0.38525	0.082031	-56.03	15.8215	45.875	0.17334	-0.037109	0.18896	NaN	NaN	NaN	NaN	NaN	NaN
1.382	32.765	-5.753	550.188	-0.43897	0.47876	-0.11963	28.575	195.276	580.79	-0.83525	0.37178	0.082031	-27.227	43.7243	21.5849	0.14697	-0.041992	0.19727	NaN	NaN	NaN	NaN	NaN	NaN
1.384	23.358	-8.912	562.248	-0.42578	0.46191	-0.11182	-5.226	193.467	565.809	-0.80625	0.35352	0.073145	-40.303	20.5683	6.04	0.11816	-0.051758	0.20215	NaN	NaN	NaN	NaN	NaN	NaN
1.386	20.011	-10.5318	560.23	-0.4082	0.44336	-0.098633	8.251	147.4681	569.215	-0.76875	0.34024	0.070801	-36.673	27.0549	26.895067	0.097411	-0.04834	0.20581	NaN	NaN	NaN	NaN	NaN	NaN
1.388	12.934	-16.158	528.064	-0.39941	0.43359	-0.086914	-40.0813	178.219	527.744	-0.73682	0.3292	0.068457	-65.083	-12.1131	35.821	0.072754	-0.04541	0.21094	NaN	NaN	NaN	NaN	NaN	NaN
1.39	6.455	-4.177	498.4534	-0.38379	0.41602	-0.083984	-46.095	130.0671	496.933	-0.70459	0.31494	0.064941	-46.912	17.3741109	24.9476	0.055176	-0.048828	0.21729	NaN	NaN	NaN	NaN	NaN	NaN
1.392	15.281	-15.2129	498.01	-0.37036	0.39795	-0.077881	-5.003	120.706	457.769	-0.67138	0.30342	0.063086	-35.609	6.131	21.2961	0.044922	-0.05127	0.21875	NaN	NaN	NaN	NaN	NaN	NaN
1.394	9.378	-1.591	465.929	-0.35547	0.38574	-0.071777	-58.82454	151.533	394.1472	-0.63692	0.29131	0.054297	-37.879	43.314	35.749	0.027344	-0.055664	0.22119	NaN	NaN	NaN	NaN	NaN	NaN
1.396	28.858	-1.666	473.486	-0.33594	0.36719	-0.0625	-51.7077	103.408	395.6681	-0.60762	0.27569	0.054297	-10.083	21.9393	49.495	0.024414	-0.055664	0.22168	NaN	NaN	NaN	NaN	NaN	NaN
1.398	25.552	1.614	445.31	-0.32715	0.35742	-0.061035	-34.078	130.59366	379.001	-0.58769	0.25957	0.049317	-16.273	15.2096	60.965	0.012695	-0.057617	0.22168	NaN	NaN	NaN	NaN	NaN	NaN
1.4	34.216	-4.249	458.74	-0.30762	0.34473	-0.053223	-57.3413	123.148	354.214	-0.56348	0.25146	0.042969	-0.537999999999997	14.552	19.0333	0.0083008	-0.061523	0.2207	NaN	NaN	NaN	NaN	NaN	NaN
1.402	37.252	-7.6595	448.518	-0.28931	0.32861	-0.048096	-10.396	77.9119	343.678	-0.53672	0.24355	0.046094	19.546	37.4476	14.5254	0.00097656	-0.058594	0.21973	NaN	NaN	NaN	NaN	NaN	NaN
1.404	35.406	1.8625	415.8528	-0.27246	0.31885	-0.04248	-25.042	118.192	306.585	-0.50791	0.23105	0.048144	38.85	31.055	40.243	-0.0083008	-0.052246	0.2251	NaN	NaN	NaN	NaN	NaN	NaN
1.406	50.34	13.2828	413.118	-0.24902	0.30518	-0.035645	-38.0027	94.699	293.541	-0.4747	0.22754	0.042676	31.892	40.4368	71.033	-0.013916	-0.053955	0.21508	NaN	NaN	NaN	NaN	NaN	NaN
1.408	49.115	15.4718	400.556	-0.24023	0.2959	-0.030762	9.86300000000001	113.7794	261.6205	-0.43164	0.21465	0.044238	61.008	37.8764	40.993	-0.021484	-0.049805	0.20898	NaN	NaN	NaN	NaN	NaN	NaN
1.41	54.027	12.9052	380.693	-0.22168	0.27881	-0.026367	-14.869	151.909	215.8663	-0.37988	0.20605	0.04541	42.22	42.2386	36.301	-0.022461	-0.052734	0.20313	NaN	NaN	NaN	NaN	NaN	NaN
1.412	31.799	5.5941	364.951	-0.208	0.26806	-0.016845	11.402	115.202	202.803	-0.33272	0.20244	0.043359	51.834	22.476	18.354	-0.027344	-0.050781	0.20166	NaN	NaN	NaN	NaN	NaN	NaN
1.414	57.111	-0.3627	365.804	-0.19629	0.26123	-0.02002	18.477	125.2	195.64019	-0.27686	0.19346	0.036328	32.126	11.6703	55.024	-0.024414	-0.041016	0.19287	NaN	NaN	NaN	NaN	NaN	NaN
1.416	50.308	-0.9056	376.085	-0.18066	0.24707	-0.016602	3.648	111.007	190.003	-0.21553	0.18877	0.036719	32.071	2.4099	43.354	-0.030274	-0.036132	0.19043	NaN	NaN	NaN	NaN	NaN	NaN
1.418	54.502	7.84284	365.152	-0.17334	0.23779	-0.01123	49.756	70.8417	183.33	-0.15625	0.17256	0.033106	22.223	10.8956	43.269	-0.029297	-0.021973	0.18945	NaN	NaN	NaN	NaN	NaN	NaN
1.42	61.526	5.7558	338.9145	-0.16064	0.22656	-0.0073242	31.51	104.106	161.184	-0.10205	0.15771	0.022461	55.82	18.8465	33.9	-0.027832	-0.013672	0.18994	NaN	NaN	NaN	NaN	NaN	NaN
1.422	44.595	7.3074	344.406	-0.15503	0.22119	-0.0031738	38.0721	68.728	163.424	-0.04668	0.14209	0.013281	13.6	0.4534	55.024	-0.035156	-0.0043945	0.18848	NaN	NaN	NaN	NaN	NaN	NaN
1.424	55.828	-3.3283	336.578	-0.14697	0.2085	0.00097656	53.6403	52.2001	161.179	0.0049806	0.12412	0.0037109	7.226	0.152999999999999	45.8071	-0.02832	0.013184	0.17871	NaN	NaN	NaN	NaN	NaN	NaN
1.426	13.173	3.0895	321.851	-0.14014	0.19971	0.0078125	35.687	64.438	122.4261	0.055371	0.10381	-0.0041016	-6.401	-3.7644	27.3399	-0.022461	0.023438	0.18604	NaN	NaN	NaN	NaN	NaN	NaN
1.428	32.505	9.1622	322.61	-0.13721	0.19727	0.0078125	74.45	22.3958	128.2649	0.098632	0.082227	-0.022461	-8.891	31.24585	19.4072	-0.018066	0.032715	0.1792	NaN	NaN	NaN	NaN	NaN	NaN
1.43	18.206	10.2727	314.884	-0.13232	0.18945	0.015625	36.498	49.1471	126.2977	0.13867	0.064941	-0.030762	-18.888	16.05827	56.665	-0.0063477	0.060547	0.17041	NaN	NaN	NaN	NaN	NaN	NaN
1.432	27.88	12.1566	320.407	-0.13306	0.18408	0.016601	9.869	53.469	124.094	0.17734	0.049414	-0.045019	2.189	22.4428	55.154	5.2042e-15	0.070557	0.177	NaN	NaN	NaN	NaN	NaN	NaN
1.434	-5.802	3.8864	318.788	-0.12988	0.18311	0.023926	40.847	31.582	136.158	0.21133	0.035351	-0.060449	-51.0939	-4.13446	42.5325	0.0043945	0.084473	0.17041	NaN	NaN	NaN	NaN	NaN	NaN
1.436	-10.064	12.37337	299.73715	-0.12842	0.17041	0.026855	-3.528	73.593	101.463	0.24258	0.016992	-0.069434	-38.446	26.556	-16.7737	0.021484	0.099121	0.16553	NaN	NaN	NaN	NaN	NaN	NaN
1.438	2.169	5.4336	306.3604	-0.1333	0.16846	0.024902	-7.392	31.78	102.047	0.2664	0.0055664	-0.087207	-61.8181	10.0644	-2.2678	0.03125	0.10791	0.1665	NaN	NaN	NaN	NaN	NaN	NaN
1.44	-5.29000000000001	9.2141	295.945	-0.13184	0.16699	0.033691	22.023	23.802	120.481	0.28467	-0.010742	-0.099609	-54.397	42.203	25.824	0.034668	0.12451	0.15576	NaN	NaN	NaN	NaN	NaN	NaN
1.442	-8.265	9.8978	289.6196	-0.1333	0.16358	0.031983	-38.9961	50.288	83.777	0.29854	-0.027637	-0.11338	-50.656	25.3277	45.821	0.044678	0.13256	0.15259	NaN	NaN	NaN	NaN	NaN	NaN
1.444	-20.721	16.6355	292.513	-0.1333	0.16016	0.029297	-8.37	34.775	71.8965	0.31182	-0.038281	-0.12344	-21.535	53.887	16.4935	0.048828	0.14355	0.146	NaN	NaN	NaN	NaN	NaN	NaN
1.446	10.922	14.7622	289.345	-0.1377	0.15771	0.03418	3.004	62.36	65.844	0.31455	-0.048047	-0.13125	-37.6433	15.5408	19.1957	0.056152	0.16309	0.13525	NaN	NaN	NaN	NaN	NaN	NaN
1.448	3.712	15.3311	283.485	-0.13867	0.1582	0.041016	-71.0103	60.855	51.178	0.31621	-0.05	-0.14082	-30.226	35.06443	34.717	0.055176	0.1709	0.12939	NaN	NaN	NaN	NaN	NaN	NaN
1.45	-8.162	11.3444	290.6819	-0.13965	0.15479	0.041504	-18.728	25.073	59.386	0.31152	-0.056152	-0.1499	-23.887	2.54979	51.539	0.060547	0.18799	0.12158	NaN	NaN	NaN	NaN	NaN	NaN
1.452	-0.814999999999998	16.8349	308.3835	-0.14478	0.15161	0.041504	-18.194	47.732	26.4364	0.30694	-0.060743	-0.15556	-36.835	25.3486	42.483	0.061035	0.20508	0.11596	NaN	NaN	NaN	NaN	NaN	NaN
1.454	2.68	19.2346	310.174	-0.14746	0.15186	0.041504	-27.481	12.1665	42.1271	0.29023	-0.061132	-0.15625	-1.294	8.6578	20.8127	0.053711	0.22021	0.1001	NaN	NaN	NaN	NaN	NaN	NaN
1.456	13.899	19.9057	297.133	-0.15967	0.14941	0.047363	-12.177	10.2172	67.959	0.27266	-0.05918	-0.15859	40.591	42.3159	39.9664	0.047363	0.23096	0.10498	NaN	NaN	NaN	NaN	NaN	NaN
1.458	0.469000000000001	18.1566	287.423	-0.16357	0.15088	0.043945	-47.722	24.4195	65.567	0.25264	-0.058692	-0.15645	31.495	9.8648	56.384	0.040039	0.24658	0.10303	NaN	NaN	NaN	NaN	NaN	NaN
1.46	20.887	15.3986	303.464	-0.17334	0.14648	0.049316	-3.758	-13.8871	50.688	0.23047	-0.053223	-0.15381	30.715	22.9683	38.0409	0.022461	0.25391	0.10107	NaN	NaN	NaN	NaN	NaN	NaN
1.462	21.685	20.9177	304.024	-0.18457	0.14869	0.055176	6.066	8.5483	35.365	0.19863	-0.044336	-0.15098	28.6	6.156	18.4913	0.015625	0.26172	0.099119	NaN	NaN	NaN	NaN	NaN	NaN
1.464	30.598	28.979	287.6445	-0.19238	0.1499	0.055664	-5.35	7.8982	31.3455	0.16767	-0.033887	-0.14746	34.667	39.084	32.0933	0.0019531	0.27734	0.099609	NaN	NaN	NaN	NaN	NaN	NaN
1.466	38.637	29.653	280.2093	-0.20605	0.15674	0.053711	27.345	-12.7048	44.619	0.12939	-0.021777	-0.13886	55.597	18.2934	60.692	-0.012695	0.29004	0.094238	NaN	NaN	NaN	NaN	NaN	NaN
1.468	39.444	30.223	301.5337	-0.21338	0.15674	0.056152	4.321	38.383	28.5433	0.095899	-0.01084	-0.13174	39.954	34.801	93.765	-0.017578	0.29736	0.092285	NaN	NaN	NaN	NaN	NaN	NaN
1.47	35.536	25.9976	326.372	-0.22412	0.1582	0.062012	31.249	5.8374	26.7734	0.057129	0.0014648	-0.12842	44.677	-16.7465	75.499	-0.04541	0.3125	0.095215	NaN	NaN	NaN	NaN	NaN	NaN
1.472	28.582	33.032	306.0272	-0.23072	0.16309	0.066162	60.3022	-8.7294	38.5004	0.021093	0.01377	-0.12315	37.553	-9.721	81.43	-0.077636	0.31689	0.09497	NaN	NaN	NaN	NaN	NaN	NaN
1.474	39.1681	37.777	307.9393	-0.23779	0.1626	0.066406	11.084	-1.18993	31.0199	-0.0091797	0.027148	-0.11836	7.727	-44.422	101.1912	-0.11523	0.31787	0.098633	NaN	NaN	NaN	NaN	NaN	NaN
1.476	22.845	40.283	326.391	-0.25537	0.16797	0.069824	64.388	-13.2861	43.079	-0.045508	0.041992	-0.11523	-16.2159	-25.054	143.997	-0.18555	0.31348	0.10352	NaN	NaN	NaN	NaN	NaN	NaN
1.478	20.809	34.505	335.062	-0.2583	0.17041	0.069336	57.346	34.4714	19.9621	-0.074609	0.052832	-0.11191	-7.372	-36.58	166.1637	-0.22266	0.31543	0.10791	NaN	NaN	NaN	NaN	NaN	NaN
1.48	12.565	35.012	319.822	-0.2749	0.17432	0.073242	22.108	49.227	5.038	-0.097656	0.065918	-0.10596	-12.5247	-8.823	204.81664	-0.30176	0.31934	0.11084	NaN	NaN	NaN	NaN	NaN	NaN
1.482	33.432	39.397	329.7026	-0.28711	0.17871	0.072022	45.66	29.66448	35.3735	-0.12168	0.076856	-0.104	-39.4362	-29.6931	254.7766	-0.37134	0.3208	0.11109	NaN	NaN	NaN	NaN	NaN	NaN
1.484	15.87	38.305	350.471	-0.29346	0.18262	0.072754	15.561	50.571	22.518	-0.14023	0.091015	-0.10498	-52.561	-22.6488	366.309	-0.44531	0.32813	0.11475	NaN	NaN	NaN	NaN	NaN	NaN
1.486	2.259	23.6698	372.64	-0.31055	0.18604	0.07373	22.402	11.3194	27.5347	-0.15352	0.10156	-0.10108	-58.7041	-48.377	455.0689	-0.55615	0.34033	0.12402	NaN	NaN	NaN	NaN	NaN	NaN
1.488	-3.44	16.7156	376.753	-0.31982	0.1914	0.075927	60.5615	0.6814	35.918	-0.16357	0.11221	-0.10313	-76.3173	0.4433	570.2955	-0.62109	0.33789	0.13135	NaN	NaN	NaN	NaN	NaN	NaN
1.49	-24.703	22.9193	368.083	-0.32568	0.19238	0.078613	0.614000000000004	14.6319	28.7493	-0.16406	0.12695	-0.10254	-21.325	40.889	685.0685	-0.77832	0.34766	0.14307	NaN	NaN	NaN	NaN	NaN	NaN
1.492	8.111	23.9089	376.827	-0.34375	0.19922	0.074707	7.652	-14.24293	52.688	-0.16465	0.13829	-0.10156	-12.455	84.631	834.111	-0.91895	0.35816	0.14941	NaN	NaN	NaN	NaN	NaN	NaN
1.494	-11.367	25.612	385.103	-0.35059	0.20361	0.069336	20.603	16.6054	36.013	-0.15879	0.15117	-0.10254	-6.092	83.8	946.05613	-1.0752	0.36621	0.15186	NaN	NaN	NaN	NaN	NaN	NaN
1.496	-12.372	37.785	399.273	-0.35986	0.20752	0.072754	-14.098	34.8556	0.592000000000001	-0.14785	0.15859	-0.10723	3.396	62.543	1052.7044	-1.3022	0.38965	0.1543	NaN	NaN	NaN	NaN	NaN	NaN
1.498	-10.923	46.067	400.701	-0.36988	0.2124	0.066894	-4.931	-1.46552	30.9477	-0.13623	0.16982	-0.1043	4.52500000000001	12.869	1085.322	-1.4102	0.40625	0.15527	NaN	NaN	NaN	NaN	NaN	NaN
1.5	-6.885	48.469	415.49	-0.38037	0.22021	0.065918	-29.483	35.59	39.5776	-0.11475	0.17822	-0.10693	-16.858	-25.987	1186.944	-1.6401	0.43994	0.14258	NaN	NaN	NaN	NaN	NaN	NaN
1.502	-8.137	42.475	430.373	-0.3877	0.22705	0.067871	-45.2	26.73771	45.611	-0.0959	0.18223	-0.11211	-3.087	-70.181	1211.017	-1.8025	0.48365	0.12622	NaN	NaN	NaN	NaN	NaN	NaN
1.504	-20.656	38.695	453.693	-0.3916	0.22656	0.064453	-13.016	33.2122	43.514	-0.071582	0.18281	-0.11738	45.1079	-114.316	1219.247	-1.9375	0.52197	0.11133	NaN	NaN	NaN	NaN	NaN	NaN
1.506	8.333	37.1346	472.09	-0.39941	0.23584	0.054199	-28.281	45.8273208	35.8306	-0.043066	0.18555	-0.11855	99.8361	-163.411	1152.02	-2.0542	0.59229	0.067383	NaN	NaN	NaN	NaN	NaN	NaN
1.508	7.207	52.54	469.197	-0.40674	0.24439	0.051025	-17.228	-9.406	73.222	-0.014648	0.18838	-0.12461	98.348	-214.041	1116.91	-2.0625	0.62305	0.049805	NaN	NaN	NaN	NaN	NaN	NaN
1.51	21.273	63.12	457.432	-0.40625	0.24854	0.044434	-18.215	-6.827	80.303	0.012207	0.19238	-0.13135	109.613	-218.698	1081.578	-2.0039	0.69531	0.00097656	NaN	NaN	NaN	NaN	NaN	NaN
1.512	-0.712000000000003	58.388	468.872	-0.41797	0.25781	0.041016	-25.778	-0.375999999999998	53.0029	0.037793	0.19238	-0.13691	107.549	-204.756	1055.692	-1.8847	0.74316	-0.011475	NaN	NaN	NaN	NaN	NaN	NaN
1.514	22.733	53.617	490.241	-0.41943	0.26611	0.044434	-0.0329999999999977	-11.927	67.3299	0.059375	0.19385	-0.14541	142.812	-137.822	969.26	-1.7441	0.78613	-0.017578	NaN	NaN	NaN	NaN	NaN	NaN
1.516	36.409	46.084	511.435	-0.43262	0.27637	0.032227	-24.638	14.292	91.5551	0.075781	0.19697	-0.15244	145.721	-108.371	971.925	-1.5195	0.80664	-0.026855	NaN	NaN	NaN	NaN	NaN	NaN
1.518	35.331	59.519	507.9	-0.44092	0.2832	0.029053	-12.276	-24.066	129.5087	0.092676	0.19961	-0.16348	160.702	-55.7232	959.575	-1.4063	0.80078	-0.041992	NaN	NaN	NaN	NaN	NaN	NaN
1.52	43.76	52.5342	536.895	-0.45068	0.2876	0.024902	47.333	-28.4959	155.507	0.096191	0.20605	-0.16211	150.8765	-65.715	994.992	-1.1899	0.72705	-0.071777	NaN	NaN	NaN	NaN	NaN	NaN
1.522	28.922	49.70236	564.739	-0.4707	0.29834	0.021973	14.923	3.966	162.459	0.091699	0.2166	-0.16582	148.82159	-29.41	1015.729	-1.0512	0.65039	-0.082031	NaN	NaN	NaN	NaN	NaN	NaN
1.524	55.968	51.2073	565.293	-0.48438	0.30078	0.020996	62.901	-25.9229	242.508	0.072363	0.22002	-0.1665	103.262849	-61.746	1028.687	-0.93066	0.5957	-0.069336	NaN	NaN	NaN	NaN	NaN	NaN
1.526	33.69	49.5895	569.663	-0.50781	0.31592	0.01416	43.865	-3.59177	320.65	0.041894	0.22275	-0.16689	88.06229	-42.26	1049.959	-0.84521	0.59814	-0.067871	NaN	NaN	NaN	NaN	NaN	NaN
1.528	39.025	58.289	588.727	-0.52954	0.32813	0.010986	2.33	23.335	374.752	0.002051	0.23008	-0.16455	84.4	-118.638	1069.682	-0.83594	0.62695	-0.06543	NaN	NaN	NaN	NaN	NaN	NaN
1.53	32.533	55.6312	609.457	-0.55078	0.33936	0.0092773	48.8	40.5691	433.8822	-0.048828	0.23535	-0.1626	65.9369	-116.34	1056.426	-0.89453	0.69141	-0.056641	NaN	NaN	NaN	NaN	NaN	NaN
1.532	44.91	62.378	601.942	-0.58594	0.35791	0.0068359	6.9248	106.659	494.838	-0.10449	0.24766	-0.16006	10.646	-231.0752	1091.819	-0.94995	0.7478	-0.048828	NaN	NaN	NaN	NaN	NaN	NaN
1.534	57.004	58.8068	610.487	-0.60107	0.36621	0.0019531	-13.4944	102.0096	589.5314	-0.16318	0.25782	-0.1581	-34.7977	-259.1587	1097.374	-1.0161	0.78955	-0.039063	NaN	NaN	NaN	NaN	NaN	NaN
1.536	20.579	61.3552	627.993	-0.63672	0.38477	-0.0019531	-0.593	112.8849	705.657	-0.22841	0.27266	-0.15733	-93.921	-376.036	1147.176	-1.1191	0.77734	-0.020508	NaN	NaN	NaN	NaN	NaN	NaN
1.538	32.699	61.6373	652.045	-0.66602	0.39698	0.0043945	-48.058	150.993	757.121	-0.30361	0.28779	-0.1501	-100.801	-331.798	1233.279	-1.166	0.77539	0.0019531	NaN	NaN	NaN	NaN	NaN	NaN
1.54	21.536	74.3657	664.26	-0.70068	0.40479	0.00048828	-21.0881	88.758	850.001	-0.38721	0.30469	-0.1499	-118.452	-370.289	1309.387	-1.3101	0.75439	0.01709	NaN	NaN	NaN	NaN	NaN	NaN
1.542	31.178	76.3115	661.5787	-0.73486	0.42969	-0.0078125	7.369	66.849	930.967	-0.48633	0.31621	-0.14903	-114.455	-286.736	1365.569	-1.4255	0.74634	0.017578	NaN	NaN	NaN	NaN	NaN	NaN
1.544	23.343	86	682.731	-0.75195	0.43555	-0.0073242	-41.2296	17.234	960.391	-0.59765	0.33135	-0.13906	-132.917	-303.731	1388.78	-1.5093	0.74658	0.025879	NaN	NaN	NaN	NaN	NaN	NaN
1.546	3.593	93.9741	710.2	-0.78271	0.45361	-0.013184	-2.408	-59.9519	1000.018	-0.72968	0.3501	-0.12851	-128.458	-210.5088	1413.2456	-1.6118	0.73291	0.024414	NaN	NaN	NaN	NaN	NaN	NaN
1.548	22.092	100.188	702.825	-0.81445	0.46801	-0.014404	16.106	-59.9191	982.096	-0.87285	0.37481	-0.11065	-121.045	-202.043	1439.181	-1.6665	0.72314	0.022461	NaN	NaN	NaN	NaN	NaN	NaN
1.55	1.722	104.43	703.7042	-0.83545	0.48486	-0.012207	-1.688	-112.2982	990.84143	-1.0322	0.4043	-0.09082	-80.2128	-98.369	1476.037	-1.7847	0.71729	0.021973	NaN	NaN	NaN	NaN	NaN	NaN
1.552	13.786	93.245	737.171	-0.86719	0.50195	-0.022949	-6.275	-154.097	1028.283	-1.217	0.43213	-0.056934	-54.4871	-104.806	1482.789	-1.8721	0.70703	0.036866	NaN	NaN	NaN	NaN	NaN	NaN
1.554	2.048	91.7024	752.012	-0.88086	0.51074	-0.020508	-66.359	-149.987	1009.82	-1.4103	0.46641	-0.026075	-11.838	-56.23	1510.432	-1.9639	0.70752	0.043457	NaN	NaN	NaN	NaN	NaN	NaN
1.556	37.037	98.3251	763.213	-0.90576	0.53564	-0.022949	-61.265	-185.661	996.527	-1.6115	0.5043	0.023145	-17.441	-124.212	1514.961	-2.0781	0.70313	0.057129	NaN	NaN	NaN	NaN	NaN	NaN
1.558	28.85	102.972	764.032	-0.92066	0.54809	-0.019776	-79.427	-140.717	1002.397	-1.8331	0.5333	0.065918	-36.309	-90.599	1512.0719	-2.1348	0.69922	0.0625	NaN	NaN	NaN	NaN	NaN	NaN
1.56	40.204	106.336	769.9066	-0.93848	0.56348	-0.02002	-109.437	-98.966	982.27	-2.0483	0.57861	0.095703	-17.207	-136.7735	1530.4615	-2.2246	0.68164	0.071777	NaN	NaN	NaN	NaN	NaN	NaN
1.562	32.239	111.7179	797.048	-0.95947	0.57861	-0.026855	-69.171	-110.841	997.501	-2.2261	0.60694	0.095898	-12.283	-99.9394	1553.708	-2.3086	0.67773	0.064941	NaN	NaN	NaN	NaN	NaN	NaN
1.564	33.081	124.491	791.2695	-0.96338	0.58252	-0.023926	-110.183	-43.759	959.622	-2.341	0.66523	0.088965	23.5	-134.796	1592.9165	-2.3418	0.67969	0.05957	NaN	NaN	NaN	NaN	NaN	NaN
1.566	55.786	128.861	806.5192	-0.97998	0.59814	-0.03418	-107.145	-26.003	949.688	-2.3707	0.72851	0.079981	66.312	-126.971	1645.336	-2.3979	0.6792	0.065918	NaN	NaN	NaN	NaN	NaN	NaN
1.568	61.443	131.898	827.511	-0.98511	0.60669	-0.037109	-74.266	-38.062	1000.4201	-2.3113	0.80273	0.080566	113.96882	-154.61	1654.21	-2.4257	0.68311	0.071777	NaN	NaN	NaN	NaN	NaN	NaN
1.57	60.201	125.8664	853.897	-0.99365	0.61475	-0.033203	-80.387	-10.567	988.0929	-2.1934	0.86523	0.081055	111.2074	-155.103	1713.163	-2.4429	0.68506	0.077148	NaN	NaN	NaN	NaN	NaN	NaN
1.572	42.545	128.6573	848.773	-0.99756	0.63037	-0.04248	-5.453	-65.586	1004.8769	-2.0311	0.89707	0.060644	127.709	-167.8103	1725.562	-2.4604	0.70166	0.075195	NaN	NaN	NaN	NaN	NaN	NaN
1.574	65.619	133.2608	860.455	-0.99219	0.64063	-0.048828	20.241	-105.972	1023.7634	-1.8227	0.87149	0.048535	125.187	-118.0615	1767.146	-2.4629	0.70313	0.081543	NaN	NaN	NaN	NaN	NaN	NaN
1.576	58.727	155.125	858.02	-0.98584	0.64795	-0.053711	-13.638	-128.269	1015.9005	-1.5965	0.78985	0.012207	163.993	-65.146	1770.155	-2.4395	0.71875	0.09375	NaN	NaN	NaN	NaN	NaN	NaN
1.578	68.336	160.013	867.969	-0.98022	0.65698	-0.060302	13.409	-227.77664	1082.543	-1.3871	0.69102	-0.028027	153.205	-36.22	1742.458	-2.4167	0.73584	0.098143	NaN	NaN	NaN	NaN	NaN	NaN
1.58	69.881	156.319	865.4712	-0.97803	0.67041	-0.065918	12.064	-218.3894	1118.1604	-1.1992	0.5918	-0.06543	148.453	-19.62	1684.983	-2.3882	0.74316	0.091309	NaN	NaN	NaN	NaN	NaN	NaN
1.582	68.076	152.38	873.0009	-0.96826	0.68604	-0.068359	9.721	-233.9271	1117.596	-1.0478	0.51074	-0.10322	97.3471	-26.65364	1673.407	-2.3433	0.74268	0.099609	NaN	NaN	NaN	NaN	NaN	NaN
1.584	81.283	160.128	899.058	-0.96973	0.6875	-0.070313	20.037	-266.51	1164.569	-0.94726	0.46641	-0.13379	60.943	-12.017	1663.61	-2.3218	0.72998	0.1167	NaN	NaN	NaN	NaN	NaN	NaN
1.586	60.405	161.419	896.811	-0.97412	0.70264	-0.081543	6.844	-217.839	1190.6612	-0.88047	0.44766	-0.15879	12.591	-4.6277	1686.1381	-2.2832	0.73438	0.13965	NaN	NaN	NaN	NaN	NaN	NaN
1.588	55.64	172.27	912.245	-0.98047	0.71534	-0.085205	32.736	-244.088	1252.428	-0.85078	0.44727	-0.15899	0.283999999999999	34.461	1646.097	-2.269	0.74414	0.1499	NaN	NaN	NaN	NaN	NaN	NaN
1.59	38.442	174.583	904.665	-0.99414	0.7207	-0.086914	45.226	-223.04	1326.692	-0.87061	0.49268	-0.14502	-18.87	20.296	1640.0915	-2.2358	0.75635	0.16309	NaN	NaN	NaN	NaN	NaN	NaN
1.592	39.313	186.443	903.182	-1.0269	0.74268	-0.091309	35.11	-146.477	1325.341	-0.95459	0.57178	-0.15772	-9.383	46.13607	1631.7181	-2.2339	0.76318	0.14063	NaN	NaN	NaN	NaN	NaN	NaN
1.594	47.7	190.587	901.226	-1.0469	0.75	-0.092773	63.4164	-177.707	1373.919	-1.0011	0.62236	-0.17705	-34.82	32.3154	1645.648	-2.2163	0.75244	0.12891	NaN	NaN	NaN	NaN	NaN	NaN
1.596	23.822	194.915	908.759	-1.0894	0.76807	-0.091309	75.497	-141.251	1398.361	-1.0327	0.62979	-0.18369	-53.261	69.6718	1643.0894	-2.1714	0.72217	0.13525	NaN	NaN	NaN	NaN	NaN	NaN
1.598	42.011	195.067	917.203	-1.1228	0.78101	-0.091797	55.085	-111.755	1350.314	-1.1049	0.61387	-0.15879	-49.772	21.262	1686.219	-2.158	0.71607	0.14502	NaN	NaN	NaN	NaN	NaN	NaN
1.6	25.013	208.05	920.324	-1.1563	0.7959	-0.089844	70.854	-129.882	1348.94169	-1.2046	0.60791	-0.13525	-58.139	47.863	1694.506	-2.1636	0.71533	0.15771	NaN	NaN	NaN	NaN	NaN	NaN
1.602	38.323	208.656	904.0128	-1.1938	0.80908	-0.089355	47.657	-53.36	1339.14	-1.3222	0.63447	-0.11552	-55.0848	-1.232	1713.268	-2.1563	0.71973	0.18359	NaN	NaN	NaN	NaN	NaN	NaN
1.604	3.944	217.026	916.03	-1.2085	0.81689	-0.089355	32.227	-85.14	1363.974	-1.4352	0.66856	-0.0875	-17.775	51.226	1682.796	-2.1523	0.71973	0.18994	NaN	NaN	NaN	NaN	NaN	NaN
1.606	35.284	207.925	922.749	-1.2246	0.82617	-0.091797	12.892	-113.015	1416.6512	-1.5433	0.71035	-0.064453	-56.025	1.977	1683.314	-2.1113	0.71094	0.1958	NaN	NaN	NaN	NaN	NaN	NaN
1.608	32.825	214.945	904.567	-1.2322	0.83472	-0.088135	-1.511	-95.257	1428.05	-1.626	0.7582	-0.042187	-80.807	58.953	1645.4252	-2.0779	0.69751	0.19263	NaN	NaN	NaN	NaN	NaN	NaN
1.61	23.89	232.255	890.4448	-1.2324	0.83984	-0.083008	0.0600000000000023	-168.069	1481.728	-1.6914	0.79492	-0.032227	-78.3235	6.919	1619.433	-2.0444	0.69189	0.20508	NaN	NaN	NaN	NaN	NaN	NaN
1.612	25.716	229.056	890.5474	-1.2212	0.84326	-0.091797	6.235	-142.0285	1549.129	-1.7375	0.81524	-0.030957	-56.412	71.6464	1583.937	-1.998	0.68555	0.2085	NaN	NaN	NaN	NaN	NaN	NaN
1.614	16.586	230.007	906.46	-1.2109	0.84961	-0.088379	-11.907	-123.8996	1526.297	-1.7639	0.81885	-0.045508	-12.354	36.191	1595.515	-1.98	0.68018	0.20703	NaN	NaN	NaN	NaN	NaN	NaN
1.616	37.03	231.559	905.06	-1.189	0.84814	-0.07959	-13.515	-163.647	1524.137	-1.778	0.81728	-0.070508	21.408	108.447	1585.989	-1.9395	0.66406	0.20654	NaN	NaN	NaN	NaN	NaN	NaN
1.618	33.678	230.805	886.46	-1.1687	0.84668	-0.077881	-9.09699999999999	-90.528	1536.338	-1.7884	0.80928	-0.098436	52.02	92.9712	1558.795	-1.9128	0.64819	0.20801	NaN	NaN	NaN	NaN	NaN	NaN
1.62	49.574	208.7042	915.42	-1.1499	0.84619	-0.074219	-3.692	-127.7364	1559.734	-1.7983	0.80908	-0.13135	68.292	180.204	1497.748	-1.8887	0.63086	0.20605	NaN	NaN	NaN	NaN	NaN	NaN
1.622	47.995	211.8638	927.929	-1.1309	0.84375	-0.070313	22.708	-151.427	1599.075	-1.8098	0.81982	-0.16162	78.4927	179.966	1473.269	-1.8477	0.61719	0.2002	NaN	NaN	NaN	NaN	NaN	NaN
1.624	58.375	235.844	936.408	-1.123	0.8457	-0.068359	30.938	-90.862	1539.799	-1.8233	0.82315	-0.18916	98.9288	253.156	1466.4427	-1.8276	0.61084	0.20215	NaN	NaN	NaN	NaN	NaN	NaN
1.626	50.95	259.4	949.356	-1.1113	0.85059	-0.066895	20.916	-134.0185	1545.361	-1.8448	0.83056	-0.22041	139.663	202.25	1463.543	-1.7852	0.5918	0.20605	NaN	NaN	NaN	NaN	NaN	NaN
1.628	75.795	279.323	967.356	-1.125	0.85547	-0.067871	-10.804	-89.961	1559.481	-1.8608	0.8251	-0.24814	155	240.7	1458.374	-1.7508	0.58423	0.20362	NaN	NaN	NaN	NaN	NaN	NaN
1.63	76.093	293.8038	995.5441	-1.1382	0.86182	-0.071289	-27.443	-37.267	1511.7679	-1.8804	0.82764	-0.27686	129.9845	175.9766	1440.699	-1.7183	0.57471	0.2041	NaN	NaN	NaN	NaN	NaN	NaN
1.632	64.683	309.2	1011.2916	-1.1973	0.87793	-0.065918	5.60899999999999	-77.047	1516.0183	-1.8906	0.82735	-0.29863	97.579	197.046	1382.174	-1.6836	0.57129	0.21143	NaN	NaN	NaN	NaN	NaN	NaN
1.634	89.672	301.9155	1052.972	-1.2497	0.88501	-0.063721	35.833	5.0495	1499.857	-1.9031	0.83047	-0.32539	79.7615	142.251	1327.6024	-1.6597	0.56689	0.21094	NaN	NaN	NaN	NaN	NaN	NaN
1.636	83.625	313.426	1087.066	-1.3027	0.89063	-0.059082	17.581	-22.2537	1508.633	-1.9094	0.83516	-0.34531	54.218	192.524	1289.6088	-1.6152	0.55078	0.21143	NaN	NaN	NaN	NaN	NaN	NaN
1.638	72.65	324.317	1118.662	-1.3848	0.90918	-0.057129	16.428	-34.006	1551.251	-1.9124	0.83213	-0.35224	80.912	157.696	1253.444	-1.5762	0.54297	0.21142	NaN	NaN	NaN	NaN	NaN	NaN
1.64	77.291	325.225	1107.274	-1.418	0.9082	-0.047852	20.178	30.6961	1540.712	-1.9097	0.82666	-0.36963	69.844	210.103	1240.6772	-1.5308	0.53369	0.20654	NaN	NaN	NaN	NaN	NaN	NaN
1.642	106.903	312.155	1098.662	-1.4785	0.91797	-0.042969	33.396	-39.4542	1561.236	-1.9066	0.81025	-0.37901	53.474	188.737	1187.7854	-1.4785	0.51563	0.2002	NaN	NaN	NaN	NaN	NaN	NaN
1.644	114.553	287.085	1109.741	-1.5134	0.91919	-0.036133	57.199	-25.712	1578.695	-1.9003	0.79229	-0.39053	31.573	247.296	1181.277	-1.4473	0.50586	0.1958	NaN	NaN	NaN	NaN	NaN	NaN
1.646	97.552	272.536	1103.125	-1.5313	0.92188	-0.029297	71.5633	-7.435	1540.966	-1.8894	0.76885	-0.40146	11.337	241.253	1172.043	-1.3765	0.48486	0.18945	NaN	NaN	NaN	NaN	NaN	NaN
1.648	103.68	246.194	1101.283	-1.5405	0.92822	-0.029297	81.1327	-79.255	1540.055	-1.879	0.74912	-0.40869	-10.404	291.894	1150.783	-1.3367	0.46362	0.18506	NaN	NaN	NaN	NaN	NaN	NaN
1.65	92.7	226.278	1086.406	-1.5293	0.92285	-0.025391	81.6734	-2.281	1518.7751	-1.877	0.73242	-0.41602	-18.685	293.554	1086.541	-1.291	0.44141	0.17773	NaN	NaN	NaN	NaN	NaN	NaN
1.652	115.171	192.575	1096.261	-1.5078	0.91602	-0.021484	37.852	-31.69	1503.5724	-1.8857	0.71836	-0.42149	-16.187	327.839	1025.521	-1.21	0.42871	0.16699	NaN	NaN	NaN	NaN	NaN	NaN
1.654	96.861	156.6125	1104.314	-1.4765	0.90723	-0.015137	40.1	-58.495	1528.235	-1.9027	0.71279	-0.42871	-8.527	287.239	973.6957	-1.1782	0.42432	0.16455	NaN	NaN	NaN	NaN	NaN	NaN
1.656	105.143	136.6289	1103.461	-1.4429	0.90381	-0.012695	66.1153	8.04192	1495.167	-1.9105	0.69873	-0.42168	-58.856	292.5412	951.577	-1.1055	0.39941	0.15479	NaN	NaN	NaN	NaN	NaN	NaN
1.658	84.838	121.9426	1103.074	-1.3921	0.89014	-0.0053711	39.625	-50.2839	1483.108	-1.9168	0.69297	-0.4249	-73.123	280.303	897.584	-1.0525	0.38355	0.14063	NaN	NaN	NaN	NaN	NaN	NaN
1.66	99.665	119.19238	1100.07	-1.3599	0.88525	-0.0014648	37.706	9.9621	1480.348	-1.9199	0.68359	-0.42383	-86.5418	273.381	856.8363	-1	0.36523	0.13184	NaN	NaN	NaN	NaN	NaN	NaN
1.662	89.409	111.7407	1098.939	-1.3052	0.87158	0.012695	32.097	67.294	1441.791	-1.9159	0.67881	-0.42822	-52.958	236.247	818.67	-0.93701	0.34033	0.12061	NaN	NaN	NaN	NaN	NaN	NaN
1.664	78.767	95.6589	1096.864	-1.2635	0.8689	0.021728	34.886	27.789	1454.374	-1.9026	0.66924	-0.4294	-36.989	209.0759	803.401	-0.9082	0.33984	0.11279	NaN	NaN	NaN	NaN	NaN	NaN
1.666	88.501	75.2136	1116.107	-1.2241	0.85986	0.031738	34.993	114.277	1423.42969	-1.887	0.66299	-0.42822	-19.479	201.0076	752.96	-0.8374	0.31787	0.10352	NaN	NaN	NaN	NaN	NaN	NaN
1.668	82.772	65.6386	1117.462	-1.1875	0.86035	0.040527	7.107	86.8	1377.97	-1.8756	0.66152	-0.43066	-10.374	214.321	738.119	-0.79785	0.30835	0.092285	NaN	NaN	NaN	NaN	NaN	NaN
1.67	80.052	60.145	1109.478	-1.1729	0.8584	0.050293	26.45	61.421	1388.569	-1.8652	0.65234	-0.43262	17.077	230.266	697.6001	-0.75293	0.29102	0.082031	NaN	NaN	NaN	NaN	NaN	NaN
1.672	54.286	45.984	1114.028	-1.1465	0.85352	0.063477	37.048	123.284	1367.597	-1.8462	0.65068	-0.4251	6.224	210.118	671.698	-0.7041	0.26953	0.078613	NaN	NaN	NaN	NaN	NaN	NaN
1.674	42.76	36.528	1121.98	-1.1321	0.85864	0.070313	4.60599999999999	57.295	1354.653	-1.8374	0.64776	-0.41807	24.491	197.806	612.4951	-0.67871	0.2583	0.070313	NaN	NaN	NaN	NaN	NaN	NaN
1.676	55.337	22.4798	1122.635	-1.1304	0.85498	0.081055	17.19	79.763	1345.896	-1.8167	0.64815	-0.4083	54.404	190.99081	569.108	-0.62256	0.24365	0.065918	NaN	NaN	NaN	NaN	NaN	NaN
1.678	39.615	12.0192	1101.1545	-1.1289	0.85645	0.09375	-4.47	86.205	1312.892	-1.8047	0.65078	-0.3998	97.454	217.32	525.76	-0.58179	0.22681	0.066162	NaN	NaN	NaN	NaN	NaN	NaN
1.68	26.257	-9.5667	1100.141	-1.1289	0.85547	0.099609	-20.275	18.947	1323.048	-1.791	0.65625	-0.3916	97.847	191.2766	497.827	-0.55176	0.2168	0.0625	NaN	NaN	NaN	NaN	NaN	NaN
1.682	-0.0970000000000013	-26.6093	1106.999	-1.1284	0.86963	0.1123	6.508	91.974	1319.281	-1.7703	0.65234	-0.36797	52.38	181.343	447.584	-0.49365	0.19092	0.0625	NaN	NaN	NaN	NaN	NaN	NaN
1.684	6.162	-32.921	1096	-1.1323	0.86279	0.11597	10.524	63.287	1274.967	-1.7518	0.64854	-0.35224	44.455	139.086	367.2949	-0.46729	0.18799	0.067871	NaN	NaN	NaN	NaN	NaN	NaN
1.686	-9.356	-61.3668	1085.416	-1.1304	0.86475	0.13037	19.858	72.244	1275.9899	-1.7366	0.64658	-0.33506	39.8789	147.2803	301.308	-0.42432	0.17432	0.065918	NaN	NaN	NaN	NaN	NaN	NaN
1.688	-32.4214	-85.7863	1083.226	-1.1343	0.86768	0.13379	11.765	150.274	1264.717	-1.7168	0.64043	-0.32041	58.6006	121.4537	285.304	-0.38794	0.15723	0.070313	NaN	NaN	NaN	NaN	NaN	NaN
1.69	-26.956	-117.3975	1076.864	-1.1323	0.87158	0.1416	31.611	95.4999	1232.599	-1.6948	0.6333	-0.30273	61.4008	150.12	265.4908	-0.34277	0.15332	0.069336	NaN	NaN	NaN	NaN	NaN	NaN
1.692	-35.4591	-118.4938	1050.548	-1.1348	0.87598	0.1499	36.678	135.079	1212.799	-1.6734	0.63399	-0.29073	37.679	127.688	247.436	-0.28076	0.14648	0.064453	NaN	NaN	NaN	NaN	NaN	NaN
1.694	-26.8839	-122.339	1020.136	-1.1314	0.8789	0.15478	28.128	164.762	1184.696	-1.6535	0.62685	-0.27607	6.783	156.691	212.3577	-0.24463	0.13574	0.06543	NaN	NaN	NaN	NaN	NaN	NaN
1.696	-49.499	-125.663	993.7073	-1.1328	0.88086	0.15723	56.9958	114.6859	1182.963	-1.628	0.62256	-0.26084	-6.361	119.983	194.6568	-0.19141	0.11865	0.064941	NaN	NaN	NaN	NaN	NaN	NaN
1.698	-31.6631	-140.169	989.21	-1.1211	0.88867	0.17041	63.586	194.199	1161.173	-1.6014	0.6123	-0.24355	-29.641	141.589	186.81	-0.14014	0.1062	0.060303	NaN	NaN	NaN	NaN	NaN	NaN
1.7	-54.2116	-144.331	981.383	-1.1162	0.89063	0.17334	24.512	163.716	1105.745	-1.5742	0.59961	-0.2334	-22.41	91.0399	221.853	-0.10352	0.095215	0.046387	NaN	NaN	NaN	NaN	NaN	NaN
1.702	-47.898	-156.0942	961.412	-1.0996	0.89258	0.18164	21.044	151.956	1075.7081	-1.5433	0.58994	-0.22177	-36.524	116.454	180.539	-0.041016	0.076172	0.041016	NaN	NaN	NaN	NaN	NaN	NaN
1.704	-63.982	-159.8201	952.334	-1.0969	0.89819	0.18628	20.835	200.8144	1040.182	-1.5108	0.57686	-0.21084	-69.6025	70.6847	161.776	-0.002686	0.058594	0.026123	NaN	NaN	NaN	NaN	NaN	NaN
1.706	-50.956	-145.0734	947.881	-1.0913	0.90088	0.19336	19.151	130.665	1034.5872	-1.4683	0.56006	-0.196	-85.2203	107.504	131.013	0.032715	0.045898	0.012695	NaN	NaN	NaN	NaN	NaN	NaN
1.708	-46.414	-137.438	950.934	-1.0898	0.90723	0.20068	31.657	165.9176	1014.155	-1.4282	0.54482	-0.18506	-93.136	42.784	106.639	0.080566	0.027344	-0.0043945	NaN	NaN	NaN	NaN	NaN	NaN
1.71	-69.083	-134.192	917.2291	-1.0894	0.91064	0.20166	36.5245	181.093	975.122	-1.3867	0.53125	-0.17139	-84.7697	66.579	105.9244	0.10254	0.017578	-0.010254	NaN	NaN	NaN	NaN	NaN	NaN
1.712	-72.683	-151.673	929.777	-1.0928	0.91406	0.20215	12.332	125.334	970.296	-1.3418	0.51641	-0.16563	-57.298	22.9903	94.6136	0.15576	0.0039063	-0.024414	NaN	NaN	NaN	NaN	NaN	NaN
1.714	-60.435	-161.398	937.502	-1.0916	0.92163	0.20605	2.438	180.644	946.992	-1.2933	0.50449	-0.15244	-46.412	66.566	90.687	0.17945	-0.0009766	-0.037842	NaN	NaN	NaN	NaN	NaN	NaN
1.716	-57.014	-163.379	969.383	-1.0972	0.93213	0.19922	12.033	138.9312	913.779	-1.2527	0.49043	-0.14072	-38.2182	31.850249	99.115	0.20654	-0.0068359	-0.047852	NaN	NaN	NaN	NaN	NaN	NaN
1.718	-65.892	-181.964	984.9577	-1.1006	0.9375	0.1958	14.318	151.7809	879.3216	-1.2077	0.47158	-0.12607	-37.366	71.39	94.212	0.2251	-0.013184	-0.062988	NaN	NaN	NaN	NaN	NaN	NaN
1.72	-51.738	-187.42	994.4738	-1.1016	0.94141	0.19092	-7.327	215.47	838.5	-1.1646	0.45801	-0.12012	-34.133	25.528	74.131	0.23438	-0.021973	-0.070801	NaN	NaN	NaN	NaN	NaN	NaN
1.722	-46.266	-195.67	1015.042	-1.103	0.95166	0.17529	-23.565	146.835	823.5451	-1.1259	0.44404	-0.10508	-27.84	52.528	75.15	0.24512	-0.034668	-0.07959	NaN	NaN	NaN	NaN	NaN	NaN
1.724	-54.24	-198.4935	1019.738	-1.1052	0.9563	0.16968	-17.591	174.70412	792.287	-1.0903	0.43311	-0.094434	-2.318	23.0087	58.28	0.24658	-0.041992	-0.086425	NaN	NaN	NaN	NaN	NaN	NaN
1.726	-63.586	-202.005757	1024.947	-1.1094	0.95801	0.15723	-47.0113	181.491	750.165	-1.0482	0.41943	-0.084668	13.199	69.483	70.502	0.24756	-0.050781	-0.095703	NaN	NaN	NaN	NaN	NaN	NaN
1.728	-54.112	-184.1599	1034.731	-1.1152	0.96484	0.14258	-40.3695	143.171	730.0544	-1.0086	0.40899	-0.070898	41.636	42.11	48.7859	0.23877	-0.053223	-0.10693	NaN	NaN	NaN	NaN	NaN	NaN
1.73	-53.506	-173.9214	1059.157	-1.1162	0.96484	0.13818	-13.718	197.874	686.477	-0.9707	0.41016	-0.056641	31.252	58.544	41.2217	0.23145	-0.061523	-0.11768	NaN	NaN	NaN	NaN	NaN	NaN
1.732	-61.734	-173.05299	1073.873	-1.1094	0.96777	0.13037	-36.9215	159.4246	636.52	-0.93984	0.40468	-0.045313	58.6929	10.8606	33.222	0.22266	-0.062012	-0.11377	NaN	NaN	NaN	NaN	NaN	NaN
1.734	-85.631	-183.914	1095.864	-1.0974	0.969	0.11938	-26.861	178.9328	600.537	-0.89482	0.39795	-0.031251	48.77	4.5421	42.383	0.21167	-0.069336	-0.12452	NaN	NaN	NaN	NaN	NaN	NaN
1.736	-62.993	-177.51365	1091.319	-1.0854	0.96533	0.11279	-20.654	230.099	554.7331	-0.85576	0.39053	-0.025782	69.1125	-25.0192	24.635	0.20459	-0.071289	-0.13184	NaN	NaN	NaN	NaN	NaN	NaN
1.738	-37.1227	-161.642	1081.948	-1.0547	0.96289	0.10254	-27.7616	158.4552	557.32	-0.81524	0.38427	-0.0038086	72.4115	-11.36042	39.0991	0.19092	-0.075684	-0.13135	NaN	NaN	NaN	NaN	NaN	NaN
1.74	-43.7692	-142.424	1076.968	-1.0391	0.95898	0.10059	-20.199	179.129	552.6504	-0.77344	0.38086	0.0029297	83.838	-2.8672	10.8834	0.18164	-0.073242	-0.13721	NaN	NaN	NaN	NaN	NaN	NaN
1.742	-55.818	-132.527	1088.98	-1.0156	0.94922	0.094238	-9.805	181.727	509.40293	-0.7331	0.3791	0.0089845	76.0167	23.463	38.034	0.17578	-0.075195	-0.14063	NaN	NaN	NaN	NaN	NaN	NaN
1.744	-42.659	-141.729	1099.401	-1.003	0.94239	0.091309	12.96	137.674	490.554	-0.68935	0.37725	0.021388	52.8023	13.335	28.6816	0.17139	-0.076416	-0.14405	NaN	NaN	NaN	NaN	NaN	NaN
1.746	-44.171	-149.522	1094.761	-0.99951	0.93604	0.085938	5.873	199.864	466.322	-0.64326	0.36904	0.031544	9.984	12.2295	28.9689	0.16699	-0.071289	-0.14551	NaN	NaN	NaN	NaN	NaN	NaN
1.748	-41.659	-153.004	1082.8651	-1.0107	0.93457	0.087402	19.226	146.331	439.887	-0.60146	0.36572	0.04375	7.974	16.5823	21.7472	0.16162	-0.064941	-0.14746	NaN	NaN	NaN	NaN	NaN	NaN
1.75	-78.565	-158.4749	1098.14	-1.0215	0.92773	0.089844	29.652	138.149	421.76	-0.54883	0.36719	0.048828	11.013	22.745	53.489	0.1582	-0.060059	-0.14795	NaN	NaN	NaN	NaN	NaN	NaN
1.752	-50.008	-154.04243	1100.177	-1.0527	0.91992	0.09668	23.819	162.81	371.437	-0.50362	0.3585	0.059667	7.354	41.4439	48.786	0.15186	-0.052246	-0.14453	NaN	NaN	NaN	NaN	NaN	NaN
1.754	-48.0469	-146.4158	1093.345	-1.0769	0.91529	0.1001	27.5282	87.305	357.0951	-0.45362	0.35665	0.064744	-38.594	34.376	59.4	0.13672	-0.039795	-0.14136	NaN	NaN	NaN	NaN	NaN	NaN
1.756	-73.416	-150.7651	1075.723	-1.0962	0.90869	0.10693	12.3	114.458	356.229	-0.40519	0.34805	0.07529	-37.336	34.556381	19.14625	0.12207	-0.028809	-0.13086	NaN	NaN	NaN	NaN	NaN	NaN
1.758	-62.913	-166.0883	1079.73	-1.1113	0.89648	0.11377	24.791	125.08	318.201	-0.35011	0.34277	0.080466	-69.9482	-2.6077	13.226	0.095215	-0.018066	-0.13525	NaN	NaN	NaN	NaN	NaN	NaN
1.76	-30.4651	-175.686	1084.549	-1.1152	0.89453	0.11426	49.136	92.8138	305.313	-0.29639	0.33496	0.089355	-53.206	33.48435	6.5733	0.077148	-0.0092773	-0.13281	NaN	NaN	NaN	NaN	NaN	NaN
1.762	-19.4405	-167.0409	1080.807	-1.1113	0.88281	0.13037	20.989	128.203	268.09	-0.23308	0.32549	0.088581	-70.6457	16.9381	20.0788	0.047852	-0.0014648	-0.12695	NaN	NaN	NaN	NaN	NaN	NaN
1.764	-46.804	-157.02271	1053.682	-1.1013	0.87622	0.12939	9.078	73.803	236.655	-0.177	0.32031	0.087409	-46.324	57.693	22.1634	0.02539	0.01001	-0.12304	NaN	NaN	NaN	NaN	NaN	NaN
1.766	-31.1872	-142.5237	1045.092	-1.0859	0.8623	0.12793	26.114	90.612	247.87	-0.11332	0.3164	0.093657	-65.5531	23.1878	30.938	-0.0019531	0.018555	-0.12158	NaN	NaN	NaN	NaN	NaN	NaN
1.768	-35.1759	-122.9461	1027.863	-1.0645	0.8457	0.13037	18.145	134.524	197.415	-0.051017	0.30458	0.098149	-62.769	27.4442	23.8136	-0.030762	0.027832	-0.12061	NaN	NaN	NaN	NaN	NaN	NaN
1.77	-30.0085	-113.377	991.3972	-1.0469	0.83301	0.13061	10.614	89.086	183.1636	0.010254	0.29541	0.10059	-86.9138	-20.2788	53.621	-0.043457	0.035156	-0.12109	NaN	NaN	NaN	NaN	NaN	NaN
1.772	-29.8295	-114.9458	989.825	-1.021	0.81689	0.12988	3.182	110.863	185.272	0.071392	0.28605	0.10535	-63.4387	27.8537	49.745	-0.068848	0.049316	-0.12012	NaN	NaN	NaN	NaN	NaN	NaN
1.774	-24.546	-114.4447	994.181	-0.98828	0.80664	0.13037	-14.003	92.64	154.813	0.13486	0.27208	0.1121	-28.135	6.9838	70.368	-0.081055	0.055908	-0.11694	NaN	NaN	NaN	NaN	NaN	NaN
1.776	-33.482	-95.0203	995.345	-0.97607	0.79736	0.12744	-22.186	45.9037	164.72	0.18994	0.26392	0.11406	-9.911	58.901	52.35	-0.09375	0.0625	-0.12061	NaN	NaN	NaN	NaN	NaN	NaN
1.778	-42.102	-89.4816	977.901	-0.93555	0.78125	0.12158	-20.561	78.108	137.993	0.23111	0.24878	0.11521	-10.501	17.0945	50.198	-0.099609	0.084961	-0.11475	NaN	NaN	NaN	NaN	NaN	NaN
1.78	-22.5159	-89.3346	948.6344	-0.90796	0.76587	0.11792	-25.217	25.7752	124.221	0.27783	0.23047	0.12305	15.32	58.574	23.262	-0.094727	0.090332	-0.12109	NaN	NaN	NaN	NaN	NaN	NaN
1.782	-18.917	-99.0325	940.3849	-0.88232	0.75244	0.11426	-18.488	28.3216	135.905	0.31193	0.21985	0.12811	31.166	0.8003	20.4803	-0.091309	0.104	-0.12646	NaN	NaN	NaN	NaN	NaN	NaN
1.784	-28.7999	-84.9062	932.8994	-0.84912	0.73486	0.11279	-19.302	45.851	96.358	0.3438	0.20281	0.13617	45.692	28.4739	12.546	-0.084472	0.11621	-0.12646	NaN	NaN	NaN	NaN	NaN	NaN
1.786	-14.678	-88.4395	907.4993	-0.82813	0.72266	0.10986	-21.303	13.2595	76.0774	0.36596	0.1914	0.14051	56.934	-20.2048	52.119	-0.078613	0.12402	-0.12793	NaN	NaN	NaN	NaN	NaN	NaN
1.788	-9.141	-81.841	904.878	-0.80078	0.70898	0.104	-19.542	44.119	72.2472	0.38618	0.18427	0.14614	63.911	44.73	51.641	-0.063477	0.13623	-0.12842	NaN	NaN	NaN	NaN	NaN	NaN
1.79	-7.037	-87.7308	896.004	-0.77588	0.69385	0.099611	-5.245	34.562	80.064	0.40234	0.16943	0.1499	77.6205	12.72609	45.549	-0.051758	0.14404	-0.13232	NaN	NaN	NaN	NaN	NaN	NaN
1.792	-33.8109	-81.187	893.513	-0.75342	0.68506	0.095703	9.371	2.4466	113.968	0.40846	0.16317	0.15537	77.89598	45.49	28.572	-0.028809	0.14502	-0.13672	NaN	NaN	NaN	NaN	NaN	NaN
1.794	-14.644	-84.7731	872.581	-0.7251	0.67139	0.094727	-9.123	46.657	94.526	0.41154	0.15165	0.15638	45.364	-4.80568	32.4451	-0.0080564	0.15259	-0.13892	NaN	NaN	NaN	NaN	NaN	NaN
1.796	-30.2584	-78.8512	859.523	-0.7124	0.66357	0.091797	-6.055	9.1722	80.534	0.40841	0.13691	0.16416	35.626	38.494	34.7878	0.0058594	0.15967	-0.14209	NaN	NaN	NaN	NaN	NaN	NaN
1.798	-36.838	-55.9821	839.7477	-0.68848	0.64648	0.083984	13.98	15.5363	70.422	0.39574	0.13151	0.1735	61.2351	-0.5422	49.185	0.03125	0.1665	-0.14355	NaN	NaN	NaN	NaN	NaN	NaN
1.8	-33.8852	-48.3356	825.531	-0.66577	0.63549	0.081298	1.481	45.459	38.093	0.38477	0.12891	0.17285	55.228	54.753	29.4557	0.039063	0.16992	-0.14502	NaN	NaN	NaN	NaN	NaN	NaN
1.802	-32.27251	-48.4554	796.689	-0.64844	0.62256	0.078613	21.388	23.1263	20.668	0.36686	0.12789	0.17643	33.002	-3.6022	36.119	0.059082	0.17871	-0.1499	NaN	NaN	NaN	NaN	NaN	NaN
1.804	-22.655	-58.568	791.643	-0.62305	0.60938	0.078613	34.304	55.043	5.099	0.3483	0.12058	0.17663	23.106	10.7627	46.501	0.067383	0.18432	-0.14966	NaN	NaN	NaN	NaN	NaN	NaN
1.806	-25.5148	-53.1	771.086	-0.61133	0.60742	0.072266	18.85	37.644	2.6473	0.31957	0.11955	0.18085	-16.239	-36.5399	35.58251	0.069824	0.18262	-0.15625	NaN	NaN	NaN	NaN	NaN	NaN
1.808	-42.10047	-53.41	763.437	-0.58545	0.58838	0.065918	39.424	-2.214	47.778	0.28773	0.11875	0.18031	-42.628	15.218	18.6102	0.072754	0.19238	-0.16016	NaN	NaN	NaN	NaN	NaN	NaN
1.81	-42.1394	-36.951	737.3058	-0.56787	0.57862	0.063233	27.699	29.934	59.599	0.25537	0.11914	0.17969	-23.824	1.899	30.2527	0.071777	0.19287	-0.15332	NaN	NaN	NaN	NaN	NaN	NaN
1.812	-24.29484	-35.576	720.114	-0.54834	0.56885	0.066406	24.726	5.4228	43.0769	0.21127	0.11978	0.17789	-71.7527	37.2695	48.4792	0.053711	0.19629	-0.16016	NaN	NaN	NaN	NaN	NaN	NaN
1.814	-19.7438	-24.469	694.3919	-0.52734	0.55908	0.056641	71.88487	18.4337	41.356	0.1766	0.12005	0.18576	-59.5721	18.276	43.311	0.039795	0.19922	-0.15991	NaN	NaN	NaN	NaN	NaN	NaN
1.816	-31.7242	-29.8964	669.7796	-0.51855	0.54932	0.056152	30.319	37.8508	25.6453	0.13939	0.12492	0.18336	-65.4349	25.8819	38.385	0.017578	0.19434	-0.16162	NaN	NaN	NaN	NaN	NaN	NaN
1.818	-21.871	-37.5158	668.768	-0.49707	0.53516	0.052734	13.287	0.2549	27.6039	0.10366	0.12333	0.18232	-42.418	-14.957	56.2684	-0.01416	0.19971	-0.15576	NaN	NaN	NaN	NaN	NaN	NaN
1.82	-18.1	-32.207	650.488	-0.48095	0.52588	0.049072	25.64	37.552	32.3253	0.067871	0.12549	0.18359	-75.7283	-15.784	77.597	-0.040039	0.20215	-0.1626	NaN	NaN	NaN	NaN	NaN	NaN
1.822	-22.1492	-25.254	656.864	-0.46338	0.51807	0.04248	15.221	34.897	10.0343	0.035888	0.12545	0.18873	-68.2614	-36.193	125.968	-0.099609	0.19971	-0.16309	NaN	NaN	NaN	NaN	NaN	NaN
1.824	-31.5469	-27.073	639.838	-0.44092	0.50098	0.039063	8.877	-2.4482	40.3273	0.0083068	0.12209	0.18595	-33.786	6.231	182.703	-0.15698	0.20435	-0.16015	NaN	NaN	NaN	NaN	NaN	NaN
1.826	-14.0167	-36.5622	632.327	-0.43701	0.49268	0.039551	-1.467	25.9283	53.871	-0.011114	0.12032	0.18631	8.611	20.4029	205.986	-0.2251	0.20947	-0.15967	NaN	NaN	NaN	NaN	NaN	NaN
1.828	-15.514	-33.8513	606.51	-0.41602	0.48633	0.030273	-8.268	-2.8069	40.7348	-0.036015	0.11757	0.18685	4.655	34.333	275.46	-0.33252	0.21533	-0.15088	NaN	NaN	NaN	NaN	NaN	NaN
1.83	-14.323	-9.294	580.1053	-0.40161	0.47095	0.026123	-9.21	17.8874	42.252	-0.057129	0.1167	0.18555	-8.356	8.39773	317.1849	-0.38525	0.22559	-0.15625	NaN	NaN	NaN	NaN	NaN	NaN
1.832	-15.081	-12.419	560.2756	-0.38525	0.46143	0.022461	15.638	56.014	24.0113	-0.06557	0.12424	0.1833	-40.743	1.7837	369.229	-0.51221	0.2373	-0.15625	NaN	NaN	NaN	NaN	NaN	NaN
1.834	-2.025	-17.018	552.816	-0.37158	0.44971	0.01416	0.688000000000002	13.7593	42.518	-0.071003	0.12979	0.18009	-29.313	45.021	455.683	-0.61426	0.25537	-0.14575	NaN	NaN	NaN	NaN	NaN	NaN
1.836	-10.586	-12.972	552.087	-0.36279	0.44678	0.0092773	-32.858	42.0234	34.4	-0.069025	0.13646	0.17928	-4.603	86.692	577.734	-0.72656	0.27393	-0.13672	NaN	NaN	NaN	NaN	NaN	NaN
1.838	-13.8174	-5.306	525.962	-0.3418	0.43311	0.0029297	-13.242	39.1705	3.3583	-0.064536	0.13722	0.17937	5.9398	119.385	673.483	-0.89258	0.3042	-0.12012	NaN	NaN	NaN	NaN	NaN	NaN
1.84	-1.843	-15.463	530.504	-0.32813	0.42041	-0.0046387	-21.33	18.6518	14.7998	-0.049805	0.14355	0.17578	-14.71835	86.5052	789.785	-0.99023	0.31543	-0.1084	NaN	NaN	NaN	NaN	NaN	NaN
1.842	-10.747	-10.123	520.863	-0.31348	0.41016	-0.0048828	-23.38	61.5715	44.645	-0.029124	0.14366	0.16954	-21.0878	91.45	844.12047	-1.1953	0.35742	-0.075195	NaN	NaN	NaN	NaN	NaN	NaN
1.844	-5.647	0.4129	510.736	-0.29492	0.39795	-0.01416	1.042	9.9124	55.295	-0.0062721	0.15186	0.16172	-9.6437	49.50475	938.4148	-1.416	0.40625	-0.041504	NaN	NaN	NaN	NaN	NaN	NaN
1.846	-22.237	17.8123	477.5409	-0.28516	0.38867	-0.016113	-6.832	14.6271	77.721	0.016384	0.15146	0.15743	16.8891	66.293	1041.218	-1.5391	0.42188	-0.025391	NaN	NaN	NaN	NaN	NaN	NaN
1.848	-14.132	4.7497	467.804	-0.26465	0.37598	-0.026855	-13.062	33.929	37.4725	0.036906	0.15108	0.1504	14.953	9.1833	1121.995	-1.7788	0.46924	0.027344	NaN	NaN	NaN	NaN	NaN	NaN
1.85	-27.6691	0.527000000000001	467.416	-0.25537	0.36743	-0.025879	19.767	-4.9342	54.034	0.056641	0.15088	0.14502	31.469	1.962	1127.919	-1.9565	0.51123	0.05835	NaN	NaN	NaN	NaN	NaN	NaN
1.852	-25.1289	-1.823	446.59	-0.23877	0.35547	-0.026855	8.958	21.175	63.299	0.080863	0.14902	0.13838	56.3548	-106.0955	1122.924	-2.1191	0.54102	0.088379	NaN	NaN	NaN	NaN	NaN	NaN
1.854	-20.6968	-13.965	446.85	-0.22852	0.34131	-0.03418	-13.563	14.4063	30.682	0.096975	0.14707	0.13369	42.182	-133.1476	1095.411	-2.3027	0.5957	0.12451	NaN	NaN	NaN	NaN	NaN	NaN
1.856	-17.854	-14.067	432.352	-0.22021	0.33643	-0.03125	29.138	-3.2929	21.121556	0.10752	0.14316	0.13291	-0.707000000000001	-226.762	1126.41	-2.3706	0.62354	0.14502	NaN	NaN	NaN	NaN	NaN	NaN
1.858	-22.243	-7.044	425.388	-0.20801	0.32275	-0.038086	31.767	38.559	18.362	0.11465	0.14512	0.121	-22.181	-174.6333	1131.458	-2.4448	0.69971	0.15723	NaN	NaN	NaN	NaN	NaN	NaN
1.86	-22.302	-2.445	408.045	-0.19751	0.31641	-0.037842	25.235	-6.8988	52.699	0.12109	0.14355	0.11768	-31.913	-192.119	1120.843	-2.4402	0.76197	0.1665	NaN	NaN	NaN	NaN	NaN	NaN
1.862	-15.469	0.2754	396.044	-0.19238	0.30664	-0.029785	31.484	-0.6903	81.195	0.12207	0.1501	0.11406	-69.6	-110.76	1092.286	-2.3926	0.83203	0.15332	NaN	NaN	NaN	NaN	NaN	NaN
1.864	-18.991	-15.1523	399.911	-0.18164	0.29736	-0.038086	39.3273	21.6108	59.147	0.12041	0.16035	0.10645	-82.987	-147.735	1077.127	-2.2246	0.88086	0.12451	NaN	NaN	NaN	NaN	NaN	NaN
1.866	-21.2556	-3.7605	385.013	-0.17676	0.29199	-0.037598	26.775	-5.70025	37.648	0.11377	0.16739	0.10411	-143.644	-88.09	1050.566	-2.1035	0.88281	0.094727	NaN	NaN	NaN	NaN	NaN	NaN
1.868	-19.5562	10.2414	359.325	-0.16797	0.28369	-0.033691	38.447	34.969	59.052	0.1042	0.17763	0.095899	-117.089	-107.5276	1034.34081	-1.8105	0.79785	0.052734	NaN	NaN	NaN	NaN	NaN	NaN
1.87	-39.6171	12.0913	344.662	-0.16382	0.27075	-0.040283	24.337	18.8308	42.646	0.094238	0.18848	0.091309	-136.106	-22.754	1044.01	-1.6023	0.71704	-0.0039065	NaN	NaN	NaN	NaN	NaN	NaN
1.872	-4.648	-1.2114	356.173	-0.15479	0.26709	-0.041016	14.846	-21.7566	42.168	0.081445	0.20332	0.090527	-136.729	-69.693	1096.6751	-1.4141	0.62598	-0.060547	NaN	NaN	NaN	NaN	NaN	NaN
1.874	-14.92	-9.9197	348.551	-0.14844	0.25635	-0.042969	33.17	10.8468	46.204	0.069335	0.21553	0.087988	-143.139	-47.982	1111.818	-1.2065	0.53613	-0.083008	NaN	NaN	NaN	NaN	NaN	NaN
1.876	-12.005	3.34118	322.6365	-0.14453	0.25342	-0.040527	19.85	-39.97929	66.121	0.053711	0.23311	0.080957	-78.868	-149.548	1145	-1.144	0.53467	-0.10059	NaN	NaN	NaN	NaN	NaN	NaN
1.878	-19.506	21.9148	309.8304	-0.14209	0.24756	-0.043945	9.07899999999999	-54.1802	116.184	0.047363	0.24492	0.078028	-39.16	-157.773	1163.3553	-1.1304	0.59863	-0.17578	NaN	NaN	NaN	NaN	NaN	NaN
1.88	-3.534	19.1738	324.819	-0.14014	0.24048	-0.043945	-8.859	-32.391	121.862	0.042969	0.25732	0.079102	-39.91	-226.833	1191.635	-1.1758	0.65186	-0.22168	NaN	NaN	NaN	NaN	NaN	NaN
1.882	3.853	12.69823	309.491	-0.14063	0.23438	-0.045898	-23.128	-50.5163	130.03929	0.033007	0.26924	0.073926	-58.439	-211.296	1234.632	-1.1914	0.69336	-0.23047	NaN	NaN	NaN	NaN	NaN	NaN
1.884	-10.691	12.7124	298.193	-0.14209	0.22705	-0.043945	-30.6868	8.174	157.8023	0.016211	0.28115	0.067285	-31.06	-271.9629	1287.2427	-1.2109	0.72461	-0.25195	NaN	NaN	NaN	NaN	NaN	NaN
1.886	14.29	4.1664	283.4745	-0.14551	0.22266	-0.040527	-18.4732	16.2385	218.4472	-0.0060545	0.28858	0.059863	-23.26	-276.6484	1327.9328	-1.2363	0.72461	-0.24023	NaN	NaN	NaN	NaN	NaN	NaN
1.888	12.449	8.477	292.917	-0.14014	0.21289	-0.041504	-43.9333	-3.248	296.0155	-0.027637	0.3001	0.059863	10.672	-331.033	1401.547	-1.3398	0.72656	-0.23486	NaN	NaN	NaN	NaN	NaN	NaN
1.89	13.954	9.8329	300.015	-0.14477	0.20727	-0.04126	-64.2384	60.339	365.206	-0.05957	0.31152	0.057129	2.513	-302.997	1464.807	-1.4297	0.74756	-0.21826	NaN	NaN	NaN	NaN	NaN	NaN
1.892	-21.002	3.0573	288.1981	-0.146	0.20166	-0.043945	-32.469	59.5724	464.211	-0.093948	0.32207	0.05498	25.2564	-285.619	1528.459	-1.5195	0.77051	-0.20068	NaN	NaN	NaN	NaN	NaN	NaN
1.894	-3.971	-0.416	286.713	-0.15234	0.19287	-0.044922	-20.081	91.979	597.712	-0.13701	0.33154	0.051953	-1.682	-216.327	1587.24	-1.627	0.78906	-0.19434	NaN	NaN	NaN	NaN	NaN	NaN
1.896	3.235	-2.66855	296.917	-0.1499	0.19482	-0.043945	-25.768	134.826	697.066	-0.1874	0.34795	0.049219	14.473	-173.6256	1577.195	-1.6675	0.7876	-0.19238	NaN	NaN	NaN	NaN	NaN	NaN
1.898	3.893	4.9491	285.441	-0.15674	0.18848	-0.041992	-7.114	96.198	789.2452	-0.25186	0.36446	0.045801	40.184	-135.493	1600.73	-1.748	0.78125	-0.19727	NaN	NaN	NaN	NaN	NaN	NaN
1.9	8.924	-1.4814	275.276	-0.15747	0.18579	-0.041504	26.277	102.437	879.0244	-0.33789	0.38281	0.044434	113.757	-124.594	1636.902	-1.8084	0.78199	-0.20435	NaN	NaN	NaN	NaN	NaN	NaN
1.902	4.294	0.9703	267.699	-0.15869	0.18066	-0.040039	20.546	68.11	928.97913	-0.44346	0.39658	0.048145	114.8101	-134.719	1631.111	-1.875	0.78418	-0.2085	NaN	NaN	NaN	NaN	NaN	NaN
1.904	1.412	8.58914	274.902	-0.16357	0.17822	-0.039551	29.854	-3.676	1015.676	-0.57901	0.41963	0.053809	96.2327	-116.232	1589.003	-1.9482	0.7832	-0.20947	NaN	NaN	NaN	NaN	NaN	NaN
1.906	10.176	12.14009	271.313	-0.16479	0.17602	-0.036132	33.735	-20.668	1056.397	-0.7376	0.43291	0.064356	74.9537	-105.199	1601.227	-1.9844	0.78516	-0.2124	NaN	NaN	NaN	NaN	NaN	NaN
1.908	-10.827	7.99777	277.756	-0.17139	0.16992	-0.035156	57.842	-99.902	1056.317	-0.92325	0.44404	0.073828	40.892	-56.25	1600.952	-2.0542	0.79346	-0.22705	NaN	NaN	NaN	NaN	NaN	NaN
1.91	-12.403	19.175	271.7184	-0.17188	0.16602	-0.037109	91.084	-152.445	1091.586	-1.1406	0.46191	0.090332	24.611	-74.031	1642.1562	-2.1006	0.7998	-0.23218	NaN	NaN	NaN	NaN	NaN	NaN
1.912	-13.492	23.3245	274.2581	-0.17236	0.16309	-0.035645	109.7082	-160.2045	1084.433	-1.3696	0.48926	0.10713	47.556	-64.9638	1647.624	-2.1484	0.81055	-0.24023	NaN	NaN	NaN	NaN	NaN	NaN
1.914	-4.505	33.328	263.5549	-0.17871	0.15869	-0.032715	122.3373	-218.295	1086.804	-1.6273	0.52031	0.11787	3.036	-96.6458	1679.407	-2.1953	0.81836	-0.24854	NaN	NaN	NaN	NaN	NaN	NaN
1.916	-26.591	34.972	266.83	-0.1792	0.15747	-0.034424	150.1923	-184.273	1087.945	-1.8824	0.56563	0.13506	-38.196	-92.882	1731.145	-2.2207	0.82227	-0.25635	NaN	NaN	NaN	NaN	NaN	NaN
1.918	-7.043	29.6394	274.717	-0.18311	0.15479	-0.035156	162.0615	-137.581	1034.891	-2.1038	0.63096	0.13642	-71.646	-122.923	1765.535	-2.2461	0.83594	-0.27148	NaN	NaN	NaN	NaN	NaN	NaN
1.92	-9.486	19.8583	269.321	-0.18848	0.15479	-0.038086	144.697	-111.334	1030.833	-2.2773	0.70313	0.13867	-65.7777	-82.2343	1745.622	-2.2487	0.83374	-0.27906	NaN	NaN	NaN	NaN	NaN	NaN
1.922	-16.067	17.7668	280.729	-0.19238	0.15234	-0.040039	156.878	-48.8069	1042.931	-2.3703	0.78242	0.14317	-26.101	-125.328	1773.053	-2.2476	0.82666	-0.28369	NaN	NaN	NaN	NaN	NaN	NaN
1.924	-29.7997	24.0341	278.8758	-0.19629	0.15137	-0.043945	158.252	-47.0893	1005.729	-2.3882	0.86104	0.13711	-37.466	-100.475	1732.768	-2.2378	0.81689	-0.29443	NaN	NaN	NaN	NaN	NaN	NaN
1.926	-7.97	25.437	297.172	-0.20312	0.15064	-0.043457	152.986	-23.268	1027.812	-2.3003	0.94892	0.12696	-12.06	-121.4959	1726.325	-2.228	0.80518	-0.29248	NaN	NaN	NaN	NaN	NaN	NaN
1.928	-9.723	34.439	306.352	-0.21143	0.15039	-0.047363	141.5063	24.952	1029.558	-2.1149	1.0159	0.11367	-2.74	-61.125	1680.988	-2.207	0.78516	-0.30078	NaN	NaN	NaN	NaN	NaN	NaN
1.93	-12.441	38.293	286.1908	-0.22266	0.15381	-0.049805	104.738	-1.22099999999999	1018.037	-1.8433	1.0435	0.086426	-4.52	-70.115	1697.635	-2.1973	0.771	-0.29737	NaN	NaN	NaN	NaN	NaN	NaN
1.932	-14.972	34.324	299.69	-0.229	0.15381	-0.049316	102.2649	-13.188	1006.392	-1.5292	0.99071	0.044238	-49.729	-13.356	1683.867	-2.1851	0.7583	-0.28955	NaN	NaN	NaN	NaN	NaN	NaN
1.934	-8.027	37.78	318.517	-0.24268	0.15869	-0.05127	89.1117	-53.423	972.4171	-1.2285	0.89395	-0.00048836	-58.528	-40.275	1676.223	-2.1753	0.75049	-0.28076	NaN	NaN	NaN	NaN	NaN	NaN
1.936	-10.623	35.79	328.059	-0.25439	0.16186	-0.051026	47.344	-145.192	980.8137	-0.98672	0.79199	-0.048926	-47.459	24.4038	1635.7818	-2.1738	0.73828	-0.27783	NaN	NaN	NaN	NaN	NaN	NaN
1.938	-20.5951	37.829	327.87	-0.26758	0.16602	-0.044434	27.754	-191.22514	1013.72027	-0.81035	0.70508	-0.095995	-26.104	8.0215	1628.7238	-2.1909	0.73682	-0.26953	NaN	NaN	NaN	NaN	NaN	NaN
1.94	-12.81	26.4336	348.991	-0.28516	0.16699	-0.046875	-3.068	-240.125	1019.912	-0.67725	0.62451	-0.13281	-45.474	89.417	1587.217	-2.1987	0.73194	-0.26343	NaN	NaN	NaN	NaN	NaN	NaN
1.942	3.379	32.931	365.689	-0.30029	0.17236	-0.046875	-34.537	-295.992	1096.389	-0.59082	0.58144	-0.16074	-14.381	72.099	1611.176	-2.2085	0.73096	-0.25049	NaN	NaN	NaN	NaN	NaN	NaN
1.944	-3.404	42.271	374.884	-0.31592	0.18066	-0.045898	-51.1725	-281.662	1122.891	-0.57471	0.57979	-0.15957	15.241	123.084	1604.8785	-2.2222	0.73291	-0.25293	NaN	NaN	NaN	NaN	NaN	NaN
1.946	-15.913	35.595	374.461	-0.33423	0.18848	-0.043701	-90.1	-295.216	1130.637	-0.62666	0.65127	-0.1627	45.416	66.608	1624.426	-2.2183	0.73291	-0.23975	NaN	NaN	NaN	NaN	NaN	NaN
1.948	-9.892	37.409	374.095	-0.3457	0.19238	-0.041992	-67.505	-285.396	1182.683	-0.68096	0.7165	-0.19112	77.4065	74.602	1630.547	-2.1963	0.74219	-0.24609	NaN	NaN	NaN	NaN	NaN	NaN
1.95	-1.815	46.057	399.476	-0.36768	0.2002	-0.039063	-72.257	-207.174	1181.235	-0.6875	0.75586	-0.2168	120.086	13.7382	1621.079	-2.1782	0.74463	-0.26318	NaN	NaN	NaN	NaN	NaN	NaN
1.952	-16.7295	50.762	395.7207	-0.37891	0.20361	-0.036133	-104.133	-187.927189	1229.499	-0.69082	0.75264	-0.22227	114.889	50.575	1617.087	-2.1523	0.73828	-0.27441	NaN	NaN	NaN	NaN	NaN	NaN
1.954	-25.7764	38.774	417.204	-0.3999	0.21094	-0.038574	-77.067	-122.884	1261.877	-0.72929	0.72461	-0.22159	113.6543	22.3213	1599.448	-2.1128	0.72021	-0.27979	NaN	NaN	NaN	NaN	NaN	NaN
1.956	-6.894	46.277	435.628	-0.41455	0.22021	-0.0354	-70.835	-85.758	1226.91	-0.8207	0.7168	-0.21767	89.35	66.964	1560.412	-2.0957	0.72461	-0.28857	NaN	NaN	NaN	NaN	NaN	NaN
1.958	3.193	45.227	459.02	-0.42969	0.22607	-0.035645	-68.855	-116.718	1259.182	-0.95831	0.71308	-0.21397	67.907	40.965	1541.12	-2.0508	0.72266	-0.29883	NaN	NaN	NaN	NaN	NaN	NaN
1.96	-17.368	49.9814	469.603	-0.4541	0.23633	-0.030273	-39.1052	-70	1231.2649	-1.0918	0.73242	-0.21143	79.348	82.521	1531.57	-2.0146	0.72656	-0.29883	NaN	NaN	NaN	NaN	NaN	NaN
1.962	-34.7253	58.514	487.77	-0.46826	0.24268	-0.035156	-53.8175	-83.507	1222.037	-1.2218	0.75478	-0.21436	77.4235	73.3	1504.915	-1.9688	0.72266	-0.29932	NaN	NaN	NaN	NaN	NaN	NaN
1.964	-14.161	59.098	513.649	-0.49072	0.25391	-0.033691	-44.96	-92.832	1274.699	-1.3332	0.78711	-0.22353	61.962	131.9809	1511.127	-1.9097	0.7124	-0.29883	NaN	NaN	NaN	NaN	NaN	NaN
1.966	-15.207	57.353	504.073	-0.50562	0.26075	-0.028808	-39.7452	-65.337	1282.4917	-1.4344	0.82031	-0.22276	34.414	135.682	1490.182	-1.873	0.71045	-0.29883	NaN	NaN	NaN	NaN	NaN	NaN
1.968	-20.394	54.42	508.2896	-0.5249	0.27002	-0.025879	-30.2272	-133.879	1339.9336	-1.5335	0.85596	-0.22295	7.825	196.502	1472.983	-1.8213	0.69043	-0.29883	NaN	NaN	NaN	NaN	NaN	NaN
1.97	-41.9904	58.877	512.69	-0.55273	0.28027	-0.024902	29.101	-143.77	1395.101	-1.6211	0.89453	-0.21924	0.595000000000006	195.128	1445.894	-1.7749	0.68017	-0.2915	NaN	NaN	NaN	NaN	NaN	NaN
1.972	-1.573	64.679	540.208	-0.5625	0.28857	-0.027344	40.5823	-140.609	1392.631	-1.696	0.92783	-0.20342	16.704	226.864	1394.5812	-1.7246	0.67285	-0.28564	NaN	NaN	NaN	NaN	NaN	NaN
1.974	-18.259	54.937	567.558	-0.58496	0.30078	-0.023438	29.197	-178.404	1446.917	-1.7684	0.9625	-0.19307	25.23	215.051	1356.9803	-1.6714	0.65186	-0.28369	NaN	NaN	NaN	NaN	NaN	NaN
1.976	-24.3164	62.81	577.796	-0.60523	0.30982	-0.02539	64.82878	-109.4459	1446.06	-1.8293	0.99848	-0.18643	5.497	235.63	1339.475	-1.6387	0.64844	-0.2832	NaN	NaN	NaN	NaN	NaN	NaN
1.978	-36.39595	56.4078	599.649	-0.62598	0.32227	-0.019531	59.1944	-115.465717	1452.382	-1.8746	1.0242	-0.18672	-43.246	224.572	1314.6544	-1.5703	0.63672	-0.27344	NaN	NaN	NaN	NaN	NaN	NaN
1.98	-11.9103	65.895	616.328	-0.65625	0.32959	-0.021484	74.3955	-138.48152	1516.872	-1.9067	1.0435	-0.18506	-33.22	228.174	1280.08	-1.531	0.62085	-0.25879	NaN	NaN	NaN	NaN	NaN	NaN
1.982	-8.306	71.415	633.289	-0.67578	0.33594	-0.020508	94.436	-90.983	1505.294	-1.9293	1.0535	-0.18086	-63.3756	212.1115	1248.8823	-1.48	0.59814	-0.24951	NaN	NaN	NaN	NaN	NaN	NaN
1.984	-27.5387	66.596	637.944	-0.70947	0.34619	-0.01416	72.4022	-142.593	1501.198	-1.9441	1.0547	-0.175	-52.054	199.6551	1222.89	-1.4214	0.58838	-0.24365	NaN	NaN	NaN	NaN	NaN	NaN
1.986	-11.97	53.42139	649.175	-0.74316	0.35547	-0.01001	89.9031	-99.6991	1525.574	-1.9488	1.0469	-0.16719	-64.7921	173.412	1199.481	-1.3823	0.57471	-0.23852	NaN	NaN	NaN	NaN	NaN	NaN
1.988	-8.188	62.294	666.833	-0.7793	0.36621	-0.015137	57.4836	-31.388	1476.7607	-1.9633	1.0235	-0.16055	-71	176.178	1158.473	-1.3369	0.55859	-0.22021	NaN	NaN	NaN	NaN	NaN	NaN
1.99	-22.2668	69.828	679.124	-0.82373	0.38281	-0.014648	2.694	-42.0988	1466.678	-1.9746	0.99707	-0.15625	-73.5331	206.6991	1123.974	-1.2773	0.54297	-0.20801	NaN	NaN	NaN	NaN	NaN	NaN
1.992	-20.3329	52.856	700.514	-0.8457	0.39355	-0.0097656	35.328	25.16203	1453.668	-1.9854	0.96768	-0.14267	-44.181	224.113	1082.6734	-1.252	0.53125	-0.20361	NaN	NaN	NaN	NaN	NaN	NaN
1.994	-11.197	50.9676	720.34	-0.89307	0.41064	-0.0083008	-3.45800000000001	11.9943	1442.767	-1.9914	0.93848	-0.12979	-25.634	245.41	1055.4383	-1.1919	0.51221	-0.18506	NaN	NaN	NaN	NaN	NaN	NaN
1.996	-17.421	56.4259	727.563	-0.93018	0.42334	-0.0068359	-12.033	-3.566	1511.7011	-1.9961	0.90879	-0.11533	-13.082	241.917	1024.176	-1.1474	0.49878	-0.17407	NaN	NaN	NaN	NaN	NaN	NaN
1.998	-16.5448	82.0781	723.1916	-0.9668	0.43945	0	6.05	45.4919	1504.57	-2.0053	0.88418	-0.10977	15.945	276.532	978.1481	-1.1079	0.48975	-0.15967	NaN	NaN	NaN	NaN	NaN	NaN
2	-5.859	80.1608	741.436	-1.0132	0.45752	0.00097656	-53.214	5.286	1513.212	-2.0059	0.85547	-0.092773	24.381	275.032	945.909	-1.0581	0.46729	-0.14697	NaN	NaN	NaN	NaN	NaN	NaN
2.002	0.093	80.2383	759.897	-1.0337	0.46924	0.003418	-33.342	16.373	1556.673	-2.0064	0.82998	-0.075391	49.0396	297.302	917.745	-1.0288	0.45557	-0.13232	NaN	NaN	NaN	NaN	NaN	NaN
2.004	-24.694	89.4653	771.529	-1.0801	0.48633	0.012207	-35.3327	22.877	1535.317	-1.9995	0.80498	-0.061035	39.2988	259.693	873.908	-0.95654	0.43994	-0.10693	NaN	NaN	NaN	NaN	NaN	NaN
2.006	-22.9289	85.5777	771.31	-1.1064	0.50098	0.012939	-44.737	-39.554	1535.514	-1.987	0.77373	-0.037597	20.27	271.055	818.1498	-0.91993	0.43164	-0.10523	NaN	NaN	NaN	NaN	NaN	NaN
2.008	-27.5724	90.874	786.673	-1.1294	0.51807	0.018555	-24.719	-9.2	1534.476	-1.9576	0.76035	-0.031055	25.093	242.9011	778.293	-0.87695	0.41406	-0.084961	NaN	NaN	NaN	NaN	NaN	NaN
2.01	-22.925	101.908	812.977	-1.1563	0.5332	0.018066	-63.5131	-48.1073	1519.0135	-1.9258	0.73242	-0.015625	33.446	266.70347	729.1081	-0.82129	0.39697	-0.069824	NaN	NaN	NaN	NaN	NaN	NaN
2.012	-31.5915	110.124	817.927	-1.1597	0.52979	0.021973	-60.4052	-81.56	1561.684	-1.9045	0.69746	0.0069336	30.998	228.969	711.042	-0.78857	0.38525	-0.056641	NaN	NaN	NaN	NaN	NaN	NaN
2.014	-16.154	109.5844	802.5987	-1.1719	0.54883	0.025879	-22.676	-21.6027	1525.682	-1.8858	0.66846	0.037988	17.27	259.9309	657.1431	-0.72803	0.36572	-0.041504	NaN	NaN	NaN	NaN	NaN	NaN
2.016	-25.8484	112.1316	815.9007	-1.1694	0.55811	0.026367	-62.908	-51.541	1500.392	-1.8881	0.65127	0.067285	11.945	216.96978	629.6535	-0.68115	0.3457	-0.02832	NaN	NaN	NaN	NaN	NaN	NaN
2.018	-21.539	110.268	831.38	-1.1587	0.56787	0.027344	-14.399	-17.341	1520.472	-1.9144	0.65879	0.090234	17.849	239.938	618.563	-0.63135	0.33057	-0.015625	NaN	NaN	NaN	NaN	NaN	NaN
2.02	-22.3765	116.496	839.732	-1.1504	0.57031	0.02832	-14.516	30.0459	1468.356	-1.9663	0.68115	0.087402	24.861	174.121	596.397	-0.57275	0.30322	0.0024414	NaN	NaN	NaN	NaN	NaN	NaN
2.022	-27.0892	111.715	858.28	-1.1406	0.57324	0.032715	-24.438	14.0932	1445.629	-1.9361	0.69766	0.078809	18.94	215.805	551.763	-0.53906	0.29395	0.0087891	NaN	NaN	NaN	NaN	NaN	NaN
2.024	-26.852	106.3391	870.307	-1.1245	0.57764	0.032715	58.9962	100.58	1425.372	-1.8835	0.69443	0.0875	11.931	181.881	526.601	-0.47803	0.2666	0.025879	NaN	NaN	NaN	NaN	NaN	NaN
2.026	-13.6374	109.2134	882.566	-1.111	0.58325	0.034668	15.969	101.139	1415.3475	-1.8616	0.70029	0.10469	14.9	231.874	461.255	-0.42798	0.25196	0.037842	NaN	NaN	NaN	NaN	NaN	NaN
2.028	-32.3442	125.4401	893.423	-1.0996	0.58691	0.036133	32.903	77.862	1459.49	-1.8712	0.71416	0.11553	-23.96	177.6899	426.393	-0.37402	0.23633	0.046387	NaN	NaN	NaN	NaN	NaN	NaN
2.03	-34.0334	134.303	883.6374	-1.0933	0.59424	0.036621	80.0454	122.813	1431.08	-1.8784	0.74268	0.12207	-47.921	213.482	382.45	-0.30225	0.21191	0.058105	NaN	NaN	NaN	NaN	NaN	NaN
2.032	-18.024	126.672	894.87	-1.0874	0.60107	0.040039	40.319	60.8854	1394.864	-1.8664	0.75996	0.12783	-68.1577	146.998	355.5231	-0.25684	0.20703	0.06543	NaN	NaN	NaN	NaN	NaN	NaN
2.034	-13.409	133.794	888.9505	-1.0874	0.60889	0.041504	72.9468	67.4332	1406.265	-1.8293	0.77481	0.13799	-60.972	169.5416	308.4805	-0.1792	0.19238	0.072266	NaN	NaN	NaN	NaN	NaN	NaN
2.036	-24.4279	137.185	901.0697	-1.0928	0.61816	0.042969	61.3119	72.0181	1368.372	-1.7793	0.77481	0.13487	-49.2992	108.068	288.984	-0.10962	0.177	0.078369	NaN	NaN	NaN	NaN	NaN	NaN
2.038	-22.8292	142.42	908.443	-1.1006	0.62793	0.044434	26.193	11.856	1365.411	-1.728	0.7708	0.13457	-63.8545	149.771	236.321	-0.04248	0.16357	0.081055	NaN	NaN	NaN	NaN	NaN	NaN
2.04	1.897	134.813	916.457	-1.1211	0.64355	0.050293	80.4452	48.741	1328.867	-1.6855	0.76563	0.13232	-56.764	92.2952	230.194	0.047363	0.1377	0.093262	NaN	NaN	NaN	NaN	NaN	NaN
2.042	-11.469	146.059	930.076	-1.1348	0.64844	0.051758	31.954	36.543	1293.4259	-1.6481	0.75938	0.13418	-52.503	133.745	177.8155	0.079102	0.12402	0.090332	NaN	NaN	NaN	NaN	NaN	NaN
2.044	-13.998	154.174	928.6196	-1.1538	0.66943	0.04834	33.016	23.192	1296.57004	-1.6141	0.76094	0.13427	-33.563	86.0278	191.6761	0.15967	0.10498	0.097656	NaN	NaN	NaN	NaN	NaN	NaN
2.046	-5.135	167.94	932.467	-1.187	0.68018	0.053711	50.574	91.6236	1282.017	-1.5817	0.7582	0.12998	-9.713	137.188	171.7614	0.20191	0.084961	0.10303	NaN	NaN	NaN	NaN	NaN	NaN
2.048	-1.798	177.346	926.195	-1.2007	0.68799	0.051758	10.458	74.7056	1276.6777	-1.5529	0.75703	0.13086	-3.073	96.837	163.38	0.2373	0.069824	0.10742	NaN	NaN	NaN	NaN	NaN	NaN
2.05	-20.4809	185.323	923.5741	-1.2354	0.70996	0.055176	32.927	120.96	1299.532	-1.5308	0.74854	0.13281	-17.375	122.648	144.1365	0.28516	0.061523	0.11768	NaN	NaN	NaN	NaN	NaN	NaN
2.052	-12.469	180.196	916.242	-1.2647	0.7207	0.057617	27.702	162.778	1256.759	-1.5069	0.74551	0.13066	-25.573	58.016	139.634	0.3042	0.046875	0.12158	NaN	NaN	NaN	NaN	NaN	NaN
2.054	-3.746	168.8157	930.235	-1.293	0.7334	0.05957	-12.067	130.884	1238.751	-1.4878	0.7337	0.12607	10.126	66.884	135.046	0.34131	0.037598	0.12646	NaN	NaN	NaN	NaN	NaN	NaN
2.056	-10.336	172.888	926.681	-1.3223	0.75195	0.059082	20.341	197.633	1197.522	-1.4686	0.7247	0.13232	21.639	26.5179	123.053	0.35498	0.024903	0.13843	NaN	NaN	NaN	NaN	NaN	NaN
2.058	-13.2211	183.08	943.232	-1.3394	0.76025	0.060547	-20.488	190.94	1146.5477	-1.4529	0.70996	0.13682	37.722	36.909	107.608	0.36963	0.018066	0.13672	NaN	NaN	NaN	NaN	NaN	NaN
2.06	-4.47	186.426	933.698	-1.355	0.77393	0.062988	-43.065	185.714	1129.211	-1.437	0.69873	0.1333	25.9901	7.55	85.78	0.36426	-0.00097656	0.1499	NaN	NaN	NaN	NaN	NaN	NaN
2.062	-17.776	185.54	949.903	-1.3699	0.78784	0.067627	-32.592	223.851	1084.12	-1.4185	0.6874	0.1416	41.771	32.86284	70.75	0.36523	-0.0097656	0.15527	NaN	NaN	NaN	NaN	NaN	NaN
2.064	-21.58	188.257	957.7392	-1.377	0.79883	0.063477	-64.787	155.6319	1080.3676	-1.3992	0.67422	0.14404	35.529	33.5417	42.516	0.34326	-0.013672	0.16992	NaN	NaN	NaN	NaN	NaN	NaN
2.066	-12.209	210.658	954.2165	-1.3828	0.8125	0.059082	-4.138	162.9104	1088.654	-1.3769	0.66055	0.1499	40.202	59.003	46.9359	0.31933	-0.015381	0.17725	NaN	NaN	NaN	NaN	NaN	NaN
2.068	-29.54035	233.201	971.724	-1.3804	0.81787	0.056152	-6.426	172.706	1053.843	-1.3537	0.64824	0.15039	45.239	25.4904	32.5329	0.29639	-0.016602	0.18848	NaN	NaN	NaN	NaN	NaN	NaN
2.07	-55.484	267.455	994.9	-1.3809	0.82813	0.050293	-29.133	141.0606	1057.822	-1.3281	0.63477	0.15332	44.076	29.1364	38.2065	0.25977	-0.019531	0.19141	NaN	NaN	NaN	NaN	NaN	NaN
2.072	-26.321	276.231	1032.926	-1.3894	0.83716	0.04541	29.471	194.32	1038.558	-1.3045	0.61709	0.15156	50.6197	21.1744	53.499	0.24316	-0.022461	0.19629	NaN	NaN	NaN	NaN	NaN	NaN
2.074	-39.386	286.1991	1065.594	-1.4038	0.84521	0.037109	7.552	170.537	1004.24	-1.2821	0.60157	0.15117	7.923	35.8867	52.306	0.21289	-0.025879	0.21045	NaN	NaN	NaN	NaN	NaN	NaN
2.076	-62.37	296.753	1099.778	-1.4351	0.854	0.037598	16.406	153.246	1001.459	-1.2523	0.58281	0.15625	-11.653	51.328	40.084	0.19092	-0.024658	0.21338	NaN	NaN	NaN	NaN	NaN	NaN
2.078	-75.212	304.128	1135.281	-1.4595	0.85986	0.036621	63.098	207.216	957.516	-1.2233	0.56309	0.15537	-14.247	50.963	29.746	0.16602	-0.023438	0.22119	NaN	NaN	NaN	NaN	NaN	NaN
2.08	-67.308	321.719	1155.099	-1.5171	0.87744	0.032227	29.001	170.542	944.227	-1.1914	0.54297	0.14941	-22.432	55.797	14.3687	0.14307	-0.016602	0.21973	NaN	NaN	NaN	NaN	NaN	NaN
2.082	-67.472	330.5	1151.619	-1.5623	0.89087	0.032959	76.5901	192.603	929.733	-1.1585	0.52627	0.14922	-22.33	38.461	20.7426	0.1333	-0.015137	0.23193	NaN	NaN	NaN	NaN	NaN	NaN
2.084	-84.702	323.096	1138.654	-1.6172	0.90332	0.027832	69.2556	199.585	874.822	-1.1228	0.51328	0.14756	-23.848	29.55016	24.6703	0.10938	-0.020508	0.23828	NaN	NaN	NaN	NaN	NaN	NaN
2.086	-51.431	307.96	1125.698	-1.6733	0.91846	0.032227	32.092	173.9196	828.325	-1.0892	0.49375	0.14287	-29.956	-5.75422	29.981	0.096192	-0.01831	0.24195	NaN	NaN	NaN	NaN	NaN	NaN
2.088	-57.622	291.787	1135.958	-1.6987	0.92627	0.024902	93.97245	220.489	800.646	-1.052	0.47519	0.14248	-51.662	-0.687999999999999	37.155	0.081543	-0.01416	0.24365	NaN	NaN	NaN	NaN	NaN	NaN
2.09	-69.511	267.753	1120.629	-1.7344	0.93945	0.014648	69.731	199.132	758.672	-1.0166	0.4541	0.1333	-31.28	-19.318	45.7548	0.072754	-0.021973	0.24951	NaN	NaN	NaN	NaN	NaN	NaN
2.092	-81.53	244.047	1127.661	-1.739	0.9436	0.0083008	66.389	173.6065	736.558	-0.98193	0.43916	0.12471	-52.027	19.1635	29.784257	0.066406	-0.022949	0.25098	NaN	NaN	NaN	NaN	NaN	NaN
2.094	-67.732	226.9528	1130.241	-1.7202	0.94189	0	69.3978	207.127	690.9488	-0.9456	0.41651	0.11934	-25.924	10.9405	55.3669	0.050293	-0.029785	0.24951	NaN	NaN	NaN	NaN	NaN	NaN
2.096	-52.435	221.1511	1108.927	-1.6655	0.93311	-0.01123	35.73	170.8015	669.6513	-0.91396	0.39971	0.11543	-20.302	43.438	31.83	0.048828	-0.029541	0.24976	NaN	NaN	NaN	NaN	NaN	NaN
2.098	-64.454	215.7956	1077.601	-1.6211	0.92578	-0.013184	73.1195	196.481	657.445	-0.88535	0.38028	0.10908	-29.257	19.5315	49.042	0.040527	-0.03125	0.24805	NaN	NaN	NaN	NaN	NaN	NaN
2.1	-59.408	191.39802	1058.98	-1.5098	0.90234	-0.019043	53.6612	198.437	634.528	-0.8501	0.36035	0.10059	-35.918	54.41	45.6359	0.030762	-0.027344	0.24512	NaN	NaN	NaN	NaN	NaN	NaN
2.102	-64.51	177.8328	1056.745	-1.4155	0.87988	-0.036133	4.564	159.607	624.044	-0.81279	0.35029	0.092676	-33.007	10.8766	47.4269	0.025391	-0.021973	0.23926	NaN	NaN	NaN	NaN	NaN	NaN
2.104	-73.85	187.797	1055.129	-1.3291	0.85059	-0.050781	22.366	178.686	577.116	-0.7793	0.3374	0.088867	-8.213	35.571	42.657	0.015137	-0.016113	0.23145	NaN	NaN	NaN	NaN	NaN	NaN
2.106	-79.775	175.483	1046.717	-1.2202	0.81494	-0.069824	-1.768	139.3817	546.909	-0.74024	0.32881	0.075977	15.852	-12.45051	55.441	0.0039062	-0.0068359	0.23169	NaN	NaN	NaN	NaN	NaN	NaN
2.108	-70.947	167.052	1048.754	-1.168	0.79492	-0.07959	-12.254	123.0943	540.499	-0.70303	0.32373	0.066797	22.456	30.3509	31.609	-0.0058594	-0.00048828	0.22559	NaN	NaN	NaN	NaN	NaN	NaN
2.11	-62.259	141.2395	1061.161	-1.0718	0.77588	-0.10352	-24.214	146.7464	486.999	-0.67578	0.3125	0.0625	12.258	-4.8735	37.043	-0.019531	0.0097656	0.21533	NaN	NaN	NaN	NaN	NaN	NaN
2.112	-59.01	149.977	1043.445	-1.0139	0.7688	-0.11499	-45.268	105.095	466.1732	-0.63906	0.29756	0.057715	36.934	44.18	7.3453	-0.017578	0.020996	0.21631	NaN	NaN	NaN	NaN	NaN	NaN
2.114	-72.869	144.4653	1032.852	-0.96094	0.76953	-0.12891	-16.754	129.2443	434.88	-0.61064	0.27998	0.04795	28.377	1.436505	31.237	-0.02832	0.041992	0.20459	NaN	NaN	NaN	NaN	NaN	NaN
2.116	-64.882	147.796	1026.803	-0.92188	0.76367	-0.14355	-41.918	119.4892	386.895	-0.58448	0.27256	0.043262	48.26	37.399	29.31002	-0.022949	0.062256	0.19849	NaN	NaN	NaN	NaN	NaN	NaN
2.118	-55.024	135.689	1031.3995	-0.90576	0.76416	-0.14404	-54.5773	94.1737	393.528	-0.55918	0.26797	0.035742	47.3529	3.0081	36.9073	-0.019043	0.074219	0.19043	NaN	NaN	NaN	NaN	NaN	NaN
2.12	-57.119	103.8897	1021.911	-0.89063	0.75488	-0.15332	-23.378	130.644	367.599	-0.53271	0.25439	0.029785	52.556	42.414	33.8466	-0.015137	0.089844	0.17725	NaN	NaN	NaN	NaN	NaN	NaN
2.122	-53.287	62.935	1019.187	-0.88452	0.75318	-0.16113	-36.919	113.623	327.173	-0.50586	0.25254	0.025098	45.1414	-11.3105	48.682	-0.0063474	0.10254	0.17261	NaN	NaN	NaN	NaN	NaN	NaN
2.124	-61.995	48.501	1033.884	-0.88672	0.74316	-0.16211	-12.29	99.861	309.626	-0.46934	0.24766	0.0208	10.185	11.0948	47.601	0.011719	0.11328	0.16211	NaN	NaN	NaN	NaN	NaN	NaN
2.126	-39.658	51.39	1013.321	-0.88965	0.73828	-0.1665	-12.99	127.259	257.0431	-0.43145	0.24727	0.014551	-3.004	-15.53315	67.294	0.033691	0.13086	0.15088	NaN	NaN	NaN	NaN	NaN	NaN
2.128	-38.4489	49.811	1006.427	-0.89209	0.73486	-0.16602	-42.8522	98.2282	245.5664	-0.38711	0.24961	0.012988	16.491	35.0878	38.971	0.041016	0.14502	0.14258	NaN	NaN	NaN	NaN	NaN	NaN
2.13	-48.2043	30.867	978.043	-0.89648	0.74121	-0.17041	9.362	137.222	235.0622	-0.33105	0.24561	0.0039063	29.448	11.60227	27.1628	0.060547	0.15967	0.13477	NaN	NaN	NaN	NaN	NaN	NaN
2.132	-14.777	-0.81264	967.287	-0.89428	0.74145	-0.1709	18.055	131.159	201.333	-0.27715	0.23906	0.0012695	16.123	31.995	22.5054	0.079346	0.17237	0.13012	NaN	NaN	NaN	NaN	NaN	NaN
2.134	-2.554	-17.8476	954.365	-0.89258	0.74609	-0.16895	-6.596	91.128	214.4084	-0.21982	0.23203	-0.0059571	-34.464	8.4818	5.674	0.085938	0.18896	0.12109	NaN	NaN	NaN	NaN	NaN	NaN
2.136	-0.289999999999999	-32.9334	947.1879	-0.88574	0.75781	-0.17383	31.764	116.666	195.412	-0.16358	0.22226	-0.016113	-40.533	43.477	0.808	0.10156	0.20605	0.11768	NaN	NaN	NaN	NaN	NaN	NaN
2.138	0.587000000000003	-41.35	960.17	-0.88281	0.75781	-0.1748	18.808	72.5309	173.489	-0.11279	0.21172	-0.027832	-27.0254	22.1814	10.8178	0.11035	0.21484	0.11426	NaN	NaN	NaN	NaN	NaN	NaN
2.14	41.416	-64.3638	959.2838	-0.87207	0.77051	-0.16748	52.947	57.433	176.32	-0.060059	0.20068	-0.033203	-24.302	41.5908	23.866	0.12695	0.23877	0.11035	NaN	NaN	NaN	NaN	NaN	NaN
2.142	35.739	-76.2933	965.226	-0.85717	0.78101	-0.17114	73.5762	69.618	141.535	-0.0070314	0.19072	-0.046582	-34.187	15.1479	50.423	0.13428	0.25513	0.10132	NaN	NaN	NaN	NaN	NaN	NaN
2.144	37.463	-86.6316	954.2189	-0.85156	0.79297	-0.17432	31.773	29.1622	144.293	0.038672	0.1795	-0.055664	-27.978	43.036	39.6335	0.13818	0.271	0.094727	NaN	NaN	NaN	NaN	NaN	NaN
2.146	53.692	-108.99	962.434	-0.8374	0.80518	-0.18018	63.9073	53.5707	140.81	0.080469	0.17012	-0.062695	-49.6842	42.1422	25.7458	0.13525	0.2876	0.092773	NaN	NaN	NaN	NaN	NaN	NaN
2.148	64.743	-119.311	955.55	-0.83545	0.81006	-0.1875	45.136	59.2508	112.7954	0.11621	0.15674	-0.076953	-46.037	54.6225	43.8096	0.13086	0.2959	0.087891	NaN	NaN	NaN	NaN	NaN	NaN
2.15	64.749	-125.176	943.9314	-0.8291	0.82031	-0.19336	39.495	37.9926	125.513	0.15137	0.13818	-0.090332	-41.84	21.3173	44.948	0.12207	0.30762	0.091797	NaN	NaN	NaN	NaN	NaN	NaN
2.152	42.313	-134.649	943.0621	-0.83349	0.82861	-0.20337	52.641	74.632	124.695	0.17558	0.12266	-0.094434	-38.37	9.0382	47.1388	0.10547	0.32007	0.084717	NaN	NaN	NaN	NaN	NaN	NaN
2.154	73.99	-155.89159	962.13	-0.84326	0.83643	-0.20898	24.503	54.412	111.259	0.19346	0.11152	-0.1041	-31.509	3.313	29.2567	0.089355	0.32617	0.088379	NaN	NaN	NaN	NaN	NaN	NaN
2.156	64.909	-172.0355	960.558	-0.8623	0.84766	-0.2168	8.521	64.567	115.731	0.20869	0.10332	-0.11309	6.001	0.7086	26.4559	0.069824	0.33643	0.095703	NaN	NaN	NaN	NaN	NaN	NaN
2.158	65.0783	-164.086	947.4735	-0.87598	0.85156	-0.21973	18.113	78.424	78.622	0.21748	0.091211	-0.11924	14.511	7.0852	43.447	0.059082	0.33691	0.10156	NaN	NaN	NaN	NaN	NaN	NaN
2.16	66.8362	-169.2424	953.249	-0.89844	0.8623	-0.22656	-25.509	41.797	73.6968	0.21631	0.084961	-0.11914	-11.062	2.1246	54.493	0.030762	0.3457	0.10547	NaN	NaN	NaN	NaN	NaN	NaN
2.162	62.233	-167.96782	963.655	-0.9187	0.86987	-0.23535	-6.862	59.716	85.5673	0.20508	0.076465	-0.12256	-2.963	26.6435	32.9196	0.017578	0.35718	0.11231	NaN	NaN	NaN	NaN	NaN	NaN
2.164	50.988	-164.4351	962.525	-0.93311	0.87158	-0.23682	-27.197	61.882	62.2755	0.19551	0.065722	-0.12734	31.055	14.835	47.147	0.0043945	0.36963	0.11768	NaN	NaN	NaN	NaN	NaN	NaN
2.166	41.848	-151.535	936.883	-0.95508	0.87891	-0.24316	-32.725	49.878	68.739	0.18809	0.067286	-0.13164	59.196	23.7307	66.612	-0.029297	0.3833	0.12451	NaN	NaN	NaN	NaN	NaN	NaN
2.168	68.341	-164.3343	950.812	-0.96826	0.88135	-0.24365	0.0559999999999974	61.622	72.52	0.17353	0.0625	-0.13164	43.046	-22.4968	105.166	-0.042969	0.39502	0.12793	NaN	NaN	NaN	NaN	NaN	NaN
2.17	44.383	-166.072	974.631	-1.002	0.88281	-0.24805	-53.8685	30.099	55.469	0.1582	0.067383	-0.13721	45.41	0.4458	91.0634	-0.084473	0.4082	0.13574	NaN	NaN	NaN	NaN	NaN	NaN
2.172	55.751	-159.937	973.9715	-1.0271	0.88306	-0.24927	-47.3207	17.9632	77.124	0.15069	0.070996	-0.13994	13.672	-27.801	100.7168	-0.12646	0.41943	0.14404	NaN	NaN	NaN	NaN	NaN	NaN
2.174	61.134	-156.311	965.0247	-1.0464	0.88916	-0.25195	-14.766	33.19699	43.1015	0.13808	0.072558	-0.13555	23.473	-13.232	104.576	-0.16846	0.43018	0.14746	NaN	NaN	NaN	NaN	NaN	NaN
2.176	52.472	-149.246	981.412	-1.0771	0.88867	-0.25195	-24.216	-5.938	43.882	0.12441	0.080762	-0.13399	8.479	-71.3556	178.374	-0.2417	0.43799	0.15088	NaN	NaN	NaN	NaN	NaN	NaN
2.178	61.11	-146.369	1008.774	-1.0918	0.88965	-0.25391	-10.862	8.2238	69.233	0.10527	0.087402	-0.13018	-11.013	-35.926	196.1456	-0.27783	0.45117	0.15332	NaN	NaN	NaN	NaN	NaN	NaN
2.18	69.551	-153.79	1019.627	-1.1128	0.89502	-0.25391	-38.788	0.729000000000001	39.505	0.083984	0.09082	-0.12451	-3.2814	-63.7297	270.164	-0.36182	0.47119	0.14746	NaN	NaN	NaN	NaN	NaN	NaN
2.182	84.288	-162.403	1022.406	-1.1167	0.90088	-0.25342	-24.517	2.265772	53.989	0.068847	0.099314	-0.12432	-9.1955	-14.112	324.115	-0.43506	0.48243	0.14722	NaN	NaN	NaN	NaN	NaN	NaN
2.184	63.767	-177.6935	1041.817	-1.1147	0.89893	-0.25391	37.149	41.472	59.717	0.047754	0.10918	-0.11914	-41.882	-38.5317	454.6868	-0.51563	0.50146	0.14893	NaN	NaN	NaN	NaN	NaN	NaN
2.186	67.762	-176.7367	1049.394	-1.1143	0.89844	-0.26172	5.135	2.7	48.505	0.030176	0.10879	-0.11524	-49.079	14.007	574.7217	-0.66504	0.52637	0.14697	NaN	NaN	NaN	NaN	NaN	NaN
2.188	50.557	-167.1206	1065.042	-1.1157	0.88916	-0.25879	14.91	-1.6946	60.09	0.010352	0.11582	-0.11221	-30.847	1.6045	721.535	-0.7583	0.53809	0.146	NaN	NaN	NaN	NaN	NaN	NaN
2.19	57.264	-163.5764	1071.738	-1.1118	0.88037	-0.25537	30.598	11.2197	39.6143	-0.0048828	0.12061	-0.11572	-5.104	77.853	846.957	-0.97656	0.55371	0.14551	NaN	NaN	NaN	NaN	NaN	NaN
2.192	85.132	-167.6744	1059.271	-1.1079	0.87402	-0.2627	35.793	4.7615	13.5396	-0.021875	0.12227	-0.11738	30.994	48.884	1021.3121	-1.1775	0.55737	0.13648	NaN	NaN	NaN	NaN	NaN	NaN
2.194	72.238	-163.8157	1058.572	-1.1123	0.87109	-0.26367	73.6255	34.297	23.378	-0.033985	0.12783	-0.11934	13.777	83.319	1147.935	-1.3843	0.56494	0.12646	NaN	NaN	NaN	NaN	NaN	NaN
2.196	86.593	-152.4935	1045.728	-1.1099	0.85986	-0.26709	26.708	20.606	16.3243	-0.044531	0.12939	-0.11309	-22.189	-1.26600000000001	1260.999	-1.6719	0.59717	0.10498	NaN	NaN	NaN	NaN	NaN	NaN
2.198	70.608	-138.388	1062.049	-1.1138	0.85205	-0.26733	14.436	4.2957	41.0745	-0.059082	0.13457	-0.11026	-25.164	0.805999999999997	1288.577	-1.8018	0.61914	0.093262	NaN	NaN	NaN	NaN	NaN	NaN
2.2	112.6449	-125.541	1070.692	-1.1235	0.84814	-0.26416	72.2301	33.0093	30.139	-0.068848	0.14014	-0.10938	-3.248	-101.742	1316.844	-2.0332	0.67676	0.058105	NaN	NaN	NaN	NaN	NaN	NaN
2.202	93.369	-137.299	1073.595	-1.1406	0.83984	-0.2627	40.5892	8.8534	25.895	-0.084668	0.15019	-0.11074	25.056	-136.41	1305.119	-2.1453	0.73511	0.039062	NaN	NaN	NaN	NaN	NaN	NaN
2.204	87.318	-129.157	1048.6411	-1.1465	0.83398	-0.26074	25.755	2.0616	60.954	-0.087988	0.15772	-0.11054	48.616	-243.709	1290.396	-2.2109	0.79102	0.015625	NaN	NaN	NaN	NaN	NaN	NaN
2.206	86.792	-136.9565	1034.7924	-1.1606	0.82764	-0.25146	46.0306	12.4059	49.436	-0.090722	0.16397	-0.11406	71.69	-222.012	1206.48	-2.1694	0.87939	-0.01123	NaN	NaN	NaN	NaN	NaN	NaN
2.208	91.379	-112.792	1039.521	-1.1668	0.82153	-0.24682	14.405	-12.0401	33.919	-0.094434	0.1708	-0.11699	91.598	-236.808	1181.118	-2.0977	0.91797	-0.025391	NaN	NaN	NaN	NaN	NaN	NaN
2.21	74.092	-96.302	1047.724	-1.1709	0.8125	-0.23975	41.389	17.7456	17.694	-0.090332	0.17822	-0.11816	109.887	-192.088	1145.8081	-1.8525	0.97656	-0.025879	NaN	NaN	NaN	NaN	NaN	NaN
2.212	59.745	-97.451	1040.239	-1.1641	0.80078	-0.23096	17.725	1.822	3.80589	-0.083398	0.18437	-0.12568	109.682	-186.02	1140.981	-1.6133	0.9834	-0.045166	NaN	NaN	NaN	NaN	NaN	NaN
2.214	75.6486	-126.6568	1024.776	-1.1577	0.80322	-0.22607	-12.958	-9.9533	37.27342	-0.071582	0.18672	-0.13506	131.759	-130.28	1090.368	-1.3672	0.94531	-0.07373	NaN	NaN	NaN	NaN	NaN	NaN
2.216	70.031	-143.3109	1018.297	-1.1362	0.78174	-0.21973	-5.468	26.6388	36.9013	-0.055176	0.19179	-0.14052	170.953	-106.378	1099.557	-1.0913	0.82275	-0.08252	NaN	NaN	NaN	NaN	NaN	NaN
2.218	68.124	-144.5275	1004.511	-1.126	0.76806	-0.2124	-26.885	19.9549	31.863	-0.038086	0.19199	-0.14258	162.613	-49.475	1143.425	-0.98828	0.76367	-0.078613	NaN	NaN	NaN	NaN	NaN	NaN
2.22	59.648	-132.2552	1001.849	-1.1157	0.75244	-0.21143	-23.589	28.7306	54.508	-0.016602	0.19434	-0.15088	139.61083	-28.968	1181.102	-0.86572	0.68994	-0.063477	NaN	NaN	NaN	NaN	NaN	NaN
2.222	48.566	-120.78989	993.274	-1.1016	0.74023	-0.20166	-15.702	39.641	41.379	-0.0014648	0.19502	-0.1543	121.8611	-30.26	1145.0213	-0.83203	0.69531	-0.0625	NaN	NaN	NaN	NaN	NaN	NaN
2.224	45.813	-115.0623	974.59	-1.0879	0.73242	-0.20068	-64.3555	11.6625	39.75	0.014942	0.19571	-0.15693	146.506	-59.256	1135.048	-0.83594	0.74219	-0.055664	NaN	NaN	NaN	NaN	NaN	NaN
2.226	40.934	-111.884	949.496	-1.0605	0.71973	-0.19531	-9.715	40.8653	33.649	0.032911	0.20274	-0.15928	122.206	-106.618	1112.899	-0.89648	0.83203	-0.0625	NaN	NaN	NaN	NaN	NaN	NaN
2.228	44.773	-113.5916	947.337	-1.04	0.71045	-0.18969	-8.954	30.8803	16.2424	0.050489	0.20527	-0.16709	60.915	-146.343	1152.76	-0.91992	0.86914	-0.046875	NaN	NaN	NaN	NaN	NaN	NaN
2.23	30.114	-99.856	955.638	-1.019	0.70068	-0.18359	-34.016	0.0300000000000011	57.99437	0.062988	0.20801	-0.17578	62.5582	-205.203	1210.453	-0.99805	0.89453	-0.016113	NaN	NaN	NaN	NaN	NaN	NaN
2.232	30.926	-85.1107	955.009	-0.9917	0.68799	-0.17725	-12.684	0.720000000000002	71.03	0.082129	0.21172	-0.17832	21.481	-270.44	1246.5278	-1.0701	0.88647	-0.0036621	NaN	NaN	NaN	NaN	NaN	NaN
2.234	7.964	-68.0391	912.618	-0.97461	0.68164	-0.17578	-36.2108	-23.9	65.2634	0.094824	0.21192	-0.18028	-24.676	-348.395	1283.838	-1.1626	0.87744	0.0092773	NaN	NaN	NaN	NaN	NaN	NaN
2.236	12.098	-65.03519	884.0714	-0.94678	0.67041	-0.17432	2.978	-24.033	102.787	0.10967	0.21895	-0.18067	-79.066	-399.49	1300.2602	-1.3262	0.86328	0.012695	NaN	NaN	NaN	NaN	NaN	NaN
2.238	14.814	-64.24115	862.4128	-0.92334	0.66113	-0.16113	23.971	-16.685	121.136	0.11738	0.22549	-0.1874	-68.5737	-390.926	1369.021	-1.3979	0.87354	0.015137	NaN	NaN	NaN	NaN	NaN	NaN
2.24	36.052	-66.6825	843.9981	-0.90381	0.65479	-0.16064	-6.119	-39.111	155.672	0.11768	0.22607	-0.19336	-85.91417	-314.558	1418.453	-1.564	0.86084	0.032227	NaN	NaN	NaN	NaN	NaN	NaN
2.242	53.027	-52.64	836.267	-0.87695	0.64258	-0.15723	28.968	-21.242	190.1	0.10791	0.23379	-0.1917	-115.088	-231.8936	1455.2379	-1.6804	0.87817	0.035889	NaN	NaN	NaN	NaN	NaN	NaN
2.244	23.324	-60.2	825.902	-0.86084	0.64111	-0.15723	45.972	3.859	194.2434	0.087891	0.23662	-0.19043	-123.22	-159.122	1450.6702	-1.8013	0.89111	0.041016	NaN	NaN	NaN	NaN	NaN	NaN
2.246	49.727	-67.644	839.33	-0.83301	0.63477	-0.1499	44.459	7.8201	272.4133	0.054688	0.2417	-0.18574	-94.841	-135.208	1498.204	-1.9414	0.91016	0.053711	NaN	NaN	NaN	NaN	NaN	NaN
2.248	40.483	-69.6571	811.561	-0.81299	0.62451	-0.14893	54.541	43.4665	369.993	0.011133	0.24756	-0.18721	-77.3938	-112.214	1529.253	-2.0132	0.92236	0.063477	NaN	NaN	NaN	NaN	NaN	NaN
2.25	48.145	-64.4976	776.3565	-0.79492	0.61816	-0.14063	5.659	49.5021	437.1661	-0.040039	0.25635	-0.18213	-44.977	-107.46	1549.557	-2.144	0.94189	0.079102	NaN	NaN	NaN	NaN	NaN	NaN
2.252	40.505	-60.613	768.2025	-0.76123	0.60791	-0.13965	15.727	84.771	547.5	-0.096975	0.26894	-0.17929	-40.158	-72	1511.103	-2.2195	0.95826	0.089356	NaN	NaN	NaN	NaN	NaN	NaN
2.254	70.043	-49.2109	752.7065	-0.74609	0.60742	-0.13574	15.6914	130.109	618.218	-0.1585	0.27988	-0.175	-29.452	-73.888	1535.834	-2.2769	0.97607	0.087891	NaN	NaN	NaN	NaN	NaN	NaN
2.256	59.731	-40.574	740.944	-0.71143	0.59814	-0.13184	-39.716	125.344	730.348	-0.22139	0.29863	-0.17109	-60.91	-65.515	1492.199	-2.3101	0.96533	0.097656	NaN	NaN	NaN	NaN	NaN	NaN
2.258	47.172	-33.126	710.278	-0.69165	0.58715	-0.12915	-10.49106	139.278	843.015	-0.29726	0.31299	-0.16983	-59.81769	-104.2975	1484.258	-2.3062	0.96143	0.10059	NaN	NaN	NaN	NaN	NaN	NaN
2.26	60.984	-60.5635	707.838	-0.66699	0.57959	-0.125	-22.7623	117.725	885.882	-0.38281	0.32861	-0.1626	-32.719	-112.895	1492.593	-2.2866	0.96533	0.087891	NaN	NaN	NaN	NaN	NaN	NaN
2.262	56.417	-58.8828	719.668	-0.63574	0.56934	-0.12012	-3.369	68.427	952.073	-0.47832	0.34649	-0.16406	-1.97	-141.826	1569.7628	-2.252	0.97461	0.078125	NaN	NaN	NaN	NaN	NaN	NaN
2.264	63.118	-48.1923	700.716	-0.61768	0.56104	-0.12012	17.629	45.407	1002.061	-0.58594	0.37559	-0.16436	-1.18600000000001	-152.246	1636.469	-2.2363	0.9707	0.08252	NaN	NaN	NaN	NaN	NaN	NaN
2.266	47.11	-30.616	657.0829	-0.58691	0.55273	-0.11914	-32.899	-22.963	1049.337	-0.70351	0.39902	-0.15849	47.405	-160.61	1689.739	-2.2183	0.95947	0.068359	NaN	NaN	NaN	NaN	NaN	NaN
2.268	59.328	-22.325	618.89623	-0.56031	0.53833	-0.11353	16.49	-82.791	1099.594	-0.83428	0.43369	-0.14834	68.8693	-147.584	1693.174	-2.1987	0.95752	0.059814	NaN	NaN	NaN	NaN	NaN	NaN
2.27	63.281	-17.257	590.8904	-0.53564	0.52783	-0.10986	35.508	-114.4652	1069.814	-0.98779	0.46338	-0.13428	92.921	-155.8817	1712.624	-2.1875	0.95703	0.055176	NaN	NaN	NaN	NaN	NaN	NaN
2.272	41.656	-12.558	583.4848	-0.50195	0.5166	-0.10742	-20.777	-172.842	1064.128	-1.162	0.49424	-0.11523	106.6999	-117.137	1698.359	-2.1777	0.95508	0.055176	NaN	NaN	NaN	NaN	NaN	NaN
2.274	42.67	-20.037	586.167	-0.48438	0.50879	-0.10254	-27.4335	-173.395	1063.714	-1.3491	0.52314	-0.087109	142.849	-87.65061	1672.646	-2.1621	0.95898	0.050293	NaN	NaN	NaN	NaN	NaN	NaN
2.276	22.325	-23.827	579.211	-0.45361	0.49854	-0.099121	-75.797	-137.962	1007.168	-1.5471	0.54854	-0.042188	135.907	-24.423	1642.694	-2.1362	0.96338	0.041992	NaN	NaN	NaN	NaN	NaN	NaN
2.278	32.766	-16.563	575.445	-0.43164	0.48584	-0.094726	-93.44	-110.741	992.22	-1.7493	0.58213	-0.0043945	94.492	-6.6888	1637.2794	-2.1121	0.94165	0.06543	NaN	NaN	NaN	NaN	NaN	NaN
2.28	15.403	-7.329	557.505	-0.4082	0.479	-0.091797	-55.94	-49.6751	955.24	-1.957	0.62012	0.0097656	75.1713	4.2457	1619.2466	-2.0972	0.93604	0.067383	NaN	NaN	NaN	NaN	NaN	NaN
2.282	20.312	-1.754	536.941	-0.38086	0.46094	-0.084961	-121.201	-29.0195	945.356	-2.0946	0.66455	0.013281	56.2002	-24.0377	1637.679	-2.0586	0.92188	0.089355	NaN	NaN	NaN	NaN	NaN	NaN
2.284	24.642	-8.3617	527.71	-0.36719	0.45605	-0.083984	-132.603	-24.2877	968.98	-2.1625	0.71523	0.0078126	42.239	-13.2057	1614.729	-2.0313	0.92285	0.084473	NaN	NaN	NaN	NaN	NaN	NaN
2.286	25.011	1.674	503.126	-0.34424	0.43994	-0.079102	-83.237	7.167	953.614	-2.1531	0.77617	-0.0125	24.697	-19.95327	1582.7572	-2.0039	0.91406	0.061035	NaN	NaN	NaN	NaN	NaN	NaN
2.288	12.209	-8.989	479.852	-0.32885	0.42871	-0.071533	-94.043	-4.137	961.541	-2.0809	0.85605	-0.02041	13.37	18.129	1550.243	-1.9742	0.89307	0.05542	NaN	NaN	NaN	NaN	NaN	NaN
2.29	-12.633	-5.774	483.779	-0.31836	0.41406	-0.066895	-48.2977	-6.907	971.9033	-1.9507	0.90479	-0.018555	-8.46899999999999	26.3972	1530.556	-1.9492	0.86133	0.0625	NaN	NaN	NaN	NaN	NaN	NaN
2.292	23.98	-8.112	486.701	-0.29688	0.4043	-0.062012	-15.03	-20.186	939.3132	-1.7711	0.91309	-0.030371	0.608999999999995	52.4956	1545.178	-1.9409	0.84229	0.075195	NaN	NaN	NaN	NaN	NaN	NaN
2.294	25.836	2.599	469.893	-0.29053	0.39502	-0.058594	12.766	-93.821	954.029	-1.5534	0.87549	-0.046289	-31.186	22.8243	1585.0733	-1.9468	0.84424	0.080078	NaN	NaN	NaN	NaN	NaN	NaN
2.296	28.137	-1.256	454.985	-0.26709	0.37988	-0.051758	47.331	-130.739	959.062	-1.3347	0.79424	-0.059961	-33.744	28.846	1594.1465	-1.9478	0.84912	0.088379	NaN	NaN	NaN	NaN	NaN	NaN
2.298	7.92299999999999	1.688	434.327	-0.25586	0.37085	-0.045655	-12.174	-171.178	978.615	-1.1283	0.71855	-0.083789	-65.9462	1.489	1621.767	-1.9351	0.84326	0.097412	NaN	NaN	NaN	NaN	NaN	NaN
2.3	37.532	1.9378	428.849	-0.24658	0.35742	-0.045898	-5.084	-236.752	1064.408	-0.97021	0.64209	-0.11084	-74.6718	10.092	1623.373	-1.9175	0.83447	0.10791	NaN	NaN	NaN	NaN	NaN	NaN
2.302	38.059	10.9289	418.483	-0.23242	0.34375	-0.038574	26.816	-238.67	1101.612	-0.87285	0.5918	-0.11563	-106.734	7.1264	1614.632	-1.9019	0.82178	0.11182	NaN	NaN	NaN	NaN	NaN	NaN
2.304	22.321	9.6463	392.7534	-0.22266	0.33691	-0.03418	-4.514	-263.826	1136.592	-0.80722	0.57852	-0.12334	-76.8959	11.83	1599.582	-1.8867	0.81641	0.10449	NaN	NaN	NaN	NaN	NaN	NaN
2.306	34.396	-3.4135	385.238	-0.20947	0.31934	-0.027344	28.21	-271.306	1185.803	-0.76504	0.57539	-0.12764	-100.6501	-9.182	1558.019	-1.8574	0.80273	0.11328	NaN	NaN	NaN	NaN	NaN	NaN
2.308	45.656	-7.012	392.629	-0.2002	0.30883	-0.024414	33.1	-229.448	1200.773	-0.76289	0.59863	-0.12744	-68.532	0.393000000000001	1531.878	-1.8316	0.79053	0.12353	NaN	NaN	NaN	NaN	NaN	NaN
2.31	51.796	-1.189	371.281	-0.18848	0.29785	-0.022461	35.744	-199.863	1261.479	-0.79053	0.64209	-0.10791	-86.018	19.5	1501.061	-1.8105	0.77539	0.12305	NaN	NaN	NaN	NaN	NaN	NaN
2.312	18.863	2.238	358.33	-0.17969	0.2915	-0.015625	87.884	-152.13776	1314.069	-0.87481	0.71348	-0.13125	-53.6151	72.659	1461.0707	-1.7671	0.76807	0.12842	NaN	NaN	NaN	NaN	NaN	NaN
2.314	40.906	2.3	351.422	-0.16992	0.28076	-0.018066	59.131	-94.218	1302.0995	-0.93828	0.75449	-0.15352	-35.484	114.442	1468.353	-1.75	0.76367	0.13037	NaN	NaN	NaN	NaN	NaN	NaN
2.316	53.083	2.018	343.919	-0.15869	0.26318	-0.012207	80.3535	-118.95	1342.222	-0.98711	0.75723	-0.13906	17.093	157.005	1454.182	-1.7178	0.74609	0.13525	NaN	NaN	NaN	NaN	NaN	NaN
2.318	43.339	1.1571	336.408	-0.15234	0.25683	-0.0095214	120.3457	-91.978	1356.442	-1.0843	0.7542	-0.11367	31.921	160.932	1455.125	-1.6941	0.73364	0.13941	NaN	NaN	NaN	NaN	NaN	NaN
2.32	26.754	-6.74476	317.974	-0.14502	0.25049	-0.0097656	81.88	-95.497	1345.7918	-1.228	0.76807	-0.089844	67.484	164.514	1432.747	-1.6772	0.71924	0.14453	NaN	NaN	NaN	NaN	NaN	NaN
2.322	34.553	-8.96768	309.996	-0.13867	0.23877	-0.0063477	92.504	-100.701	1374.8469	-1.3806	0.79991	-0.076562	66.424	178.61	1404.285	-1.6563	0.70508	0.1499	NaN	NaN	NaN	NaN	NaN	NaN
2.324	41.048	11.4411	313.821	-0.12915	0.22925	-0.0075683	64.7552	-56.133	1355.3356	-1.5109	0.84766	-0.071485	84.1766	203.929	1422.162	-1.6436	0.69336	0.14795	NaN	NaN	NaN	NaN	NaN	NaN
2.326	15.436	17.7064	303.727	-0.12549	0.22314	-0.003418	-2.752	-75.991	1395.6989	-1.6035	0.90351	-0.066797	96.0721	215.116	1406.219	-1.6226	0.68408	0.1543	NaN	NaN	NaN	NaN	NaN	NaN
2.328	7.936	-1.7711	316.224	-0.12451	0.21338	-0.0014648	38.582	-104.5972	1448.591	-1.6628	0.95615	-0.071484	107.9761	208.7343	1359.105	-1.6032	0.67358	0.15551	NaN	NaN	NaN	NaN	NaN	NaN
2.33	-6.083	-4.613	303.175	-0.12207	0.20605	0.0014648	5.853	-106.897	1453.198	-1.6992	1.0078	-0.079102	105.8016	195.317	1304.066	-1.5742	0.66602	0.15088	NaN	NaN	NaN	NaN	NaN	NaN
2.332	12.854	4.2072	305.071	-0.11865	0.20117	0.0029297	17.595	-154.658	1522.611	-1.7154	1.0346	-0.083496	110.082	165.238	1271.626	-1.5288	0.65186	0.15527	NaN	NaN	NaN	NaN	NaN	NaN
2.334	10.474	18.3856	283.072	-0.11548	0.19751	0.00097656	24.486	-127.724	1559.746	-1.7219	1.0531	-0.096094	102.8996	148.041	1231.5244	-1.5054	0.646	0.15576	NaN	NaN	NaN	NaN	NaN	NaN
2.336	0.320999999999998	15.1743	270.945	-0.11426	0.19678	0.0019531	-46.0186	-121.811	1548.282	-1.723	1.0504	-0.11524	79.32	134.401	1244.415	-1.4409	0.61963	0.15332	NaN	NaN	NaN	NaN	NaN	NaN
2.338	3.40000000000001	11.1213	270.569	-0.1167	0.18945	0.0014648	1.149	-144.172	1588.278	-1.7207	1.0514	-0.13653	87.121	170.9824	1208.942	-1.4002	0.60132	0.15088	NaN	NaN	NaN	NaN	NaN	NaN
2.34	-6.734	20.1887	264.2793	-0.12207	0.18457	0.012207	24.818	-112.6957	1571.541	-1.7207	1.0518	-0.16064	86.0827	164.012	1192.861	-1.3613	0.56934	0.146	NaN	NaN	NaN	NaN	NaN	NaN
2.342	4.107	20.5309	265.485	-0.12598	0.18652	0.014648	-0.933999999999997	-125.934	1573.205	-1.7041	1.0557	-0.18867	97.482	196.478	1154.604	-1.3022	0.54346	0.13965	NaN	NaN	NaN	NaN	NaN	NaN
2.344	-9.998	6.9949	282.684	-0.12793	0.18335	0.017823	40.743	-130.7329	1592.63	-1.6941	1.0637	-0.21406	70.831	213.448	1115.292	-1.2734	0.53125	0.13379	NaN	NaN	NaN	NaN	NaN	NaN
2.346	10.693	17.9671	291.611	-0.1333	0.18408	0.016602	-1.29799999999999	-66.823	1538.119	-1.6844	1.0656	-0.24141	55.625	288.974	1066.9661	-1.2158	0.50098	0.12256	NaN	NaN	NaN	NaN	NaN	NaN
2.348	0.270000000000003	24.6601	282.434	-0.14111	0.18262	0.021973	-11.621	-75.069	1557.2913	-1.6772	1.0696	-0.26885	18.864	304.482	1078.2271	-1.1638	0.47778	0.11914	NaN	NaN	NaN	NaN	NaN	NaN
2.35	7.364	19.4501	280.304	-0.14893	0.18213	0.019531	4.414	-28.7061	1557.1164	-1.6758	1.0723	-0.28516	-6.343	332.574	995.56117	-1.1191	0.45801	0.10596	NaN	NaN	NaN	NaN	NaN	NaN
2.352	1.943	14.6879	265.218	-0.16016	0.18262	0.024902	-39.847	6.3085	1526.2384	-1.6836	1.0621	-0.29629	-34.977	279.356	975.428	-1.0503	0.43018	0.10596	NaN	NaN	NaN	NaN	NaN	NaN
2.354	19.311	12.24286	268.59	-0.16846	0.18067	0.027588	27.061	-35.384	1539.7948	-1.6945	1.0493	-0.31143	-13.191	265.1826	905.497	-1.019	0.42725	0.088379	NaN	NaN	NaN	NaN	NaN	NaN
2.356	29.948	10.3661	279.294	-0.1748	0.18018	0.031738	38.854	1.7537	1530.368	-1.7065	1.038	-0.32158	-41.237	218.986	886.627	-0.94678	0.39502	0.086914	NaN	NaN	NaN	NaN	NaN	NaN
2.358	3.928	11.4975	272.439	-0.1875	0.18457	0.029297	-22.044	-18.7425	1546.767	-1.7162	1.0241	-0.3292	-40.61	238.933	844.415	-0.89819	0.37329	0.074951	NaN	NaN	NaN	NaN	NaN	NaN
2.36	29.597	9.4107	284.424	-0.19385	0.18799	0.032715	30.666	-30.9369	1559.978	-1.7222	1.0044	-0.3335	-83.4287	212.874	794.9875	-0.84131	0.35156	0.070313	NaN	NaN	NaN	NaN	NaN	NaN
2.362	31.49	18.7087	300.047	-0.20898	0.1875	0.037109	30.335	9.902	1544.528	-1.726	0.9834	-0.34375	-46.586	240.796	739.9316	-0.78711	0.33301	0.049805	NaN	NaN	NaN	NaN	NaN	NaN
2.364	40.148	20.7188	292.70269	-0.22363	0.19092	0.035889	43.098	-43.6042	1565.4143	-1.7332	0.9664	-0.34609	-13.953	189.6979	736.619	-0.75732	0.31885	0.049316	NaN	NaN	NaN	NaN	NaN	NaN
2.366	20.395	16.2245	302.826	-0.23193	0.19482	0.037109	91.8827	-22.4157	1562.0468	-1.7359	0.93555	-0.34883	11.279	220.957	692.249	-0.69092	0.28809	0.041016	NaN	NaN	NaN	NaN	NaN	NaN
2.368	36.689	24.661	297.033	-0.24951	0.20264	0.035156	46.033	-0.5755	1524.9773	-1.7488	0.91504	-0.35176	3.092	188.954	684.534	-0.65795	0.2644	0.034668	NaN	NaN	NaN	NaN	NaN	NaN
2.37	37.756	26.0058	299.583	-0.25732	0.20557	0.042969	85.3237	-41.625	1546.125	-1.7656	0.90625	-0.35742	26.732	236.553	640.651	-0.62891	0.24902	0.023926	NaN	NaN	NaN	NaN	NaN	NaN
2.372	7.006	38.172	295.218	-0.27588	0.21289	0.041504	79.68	6.1756	1539.189	-1.7948	0.90752	-0.36358	4.374	196.728	633.192	-0.57813	0.22021	0.025879	NaN	NaN	NaN	NaN	NaN	NaN
2.374	22.812	25.81	314.312	-0.28321	0.21509	0.038086	31.18	-19.5034	1536.251	-1.814	0.91132	-0.36494	20.243	211.535	561.519	-0.55566	0.20703	0.024902	NaN	NaN	NaN	NaN	NaN	NaN
2.376	8.20099999999999	27.1861	319.015	-0.29736	0.22168	0.040039	83.6752	-39.7961	1528.494	-1.8289	0.91445	-0.3669	21.827	173.941	535.844	-0.51172	0.18848	0.019531	NaN	NaN	NaN	NaN	NaN	NaN
2.378	32.917	38.861	329.3957	-0.30225	0.22998	0.039063	61.9773	27.6698	1496.38	-1.8375	0.92226	-0.3707	81.136	210.303	469.604	-0.48072	0.17041	0.023926	NaN	NaN	NaN	NaN	NaN	NaN
2.38	6.993	47.307	341.2446	-0.3125	0.23047	0.036621	27.767	12.236	1490.069	-1.8379	0.92773	-0.37891	83.9449	173.137	442.383	-0.45703	0.14111	0.024414	NaN	NaN	NaN	NaN	NaN	NaN
2.382	12.101	46.421	349.235	-0.32422	0.23975	0.041504	72.3437	75.9138	1468.61915	-1.8277	0.93711	-0.38027	56.849	181.5393	358.613	-0.41162	0.13086	0.027832	NaN	NaN	NaN	NaN	NaN	NaN
2.384	11.395	36.031	362.99	-0.32544	0.24683	0.038574	7.25700000000001	119.134	1421.975	-1.8085	0.94033	-0.38662	18.694	151.302	308.483	-0.39355	0.12744	0.018555	NaN	NaN	NaN	NaN	NaN	NaN
2.386	-0.704999999999998	32.246	362.076	-0.33252	0.24854	0.030273	30.638	93.302	1426.1768	-1.7913	0.9458	-0.39483	67.0532	169.718	249.315	-0.34521	0.11328	0.030273	NaN	NaN	NaN	NaN	NaN	NaN
2.388	0.603000000000002	27.931	367.473	-0.3457	0.25732	0.031738	49.836	128.082	1423.972	-1.7702	0.94853	-0.39951	78.1179	132.087	262.2655	-0.30078	0.10449	0.031494	NaN	NaN	NaN	NaN	NaN	NaN
2.39	-25.17	28.57	380.189	-0.35156	0.25977	0.028809	9.184	93.584	1416.847	-1.7573	0.95361	-0.40674	92.162	124.347	270.78	-0.25635	0.097168	0.027832	NaN	NaN	NaN	NaN	NaN	NaN
2.392	-4.144	39.288	386.426	-0.36377	0.26807	0.029785	59.769	67.281	1421.277	-1.7339	0.94599	-0.40225	64.4272	106.255	260.942	-0.18945	0.092773	0.023438	NaN	NaN	NaN	NaN	NaN	NaN
2.394	-15.132	41.449	396.784	-0.37427	0.2771	0.029297	18.172	108.132	1378.666	-1.7235	0.94414	-0.39785	44.754	131.621	231.7	-0.15137	0.085449	0.023438	NaN	NaN	NaN	NaN	NaN	NaN
2.396	-2.283	35.8445	417.544	-0.38379	0.28564	0.027832	-3.355	55.82	1381.561	-1.6996	0.94453	-0.39121	3.713	136.817	204.397	-0.088867	0.061523	0.025391	NaN	NaN	NaN	NaN	NaN	NaN
2.398	-14.95	29.22	443.618	-0.39941	0.29541	0.023926	17.306	82.45192	1346.0767	-1.6871	0.94219	-0.38594	-1.148	133.778	194.432	-0.046387	0.051758	0.014893	NaN	NaN	NaN	NaN	NaN	NaN
2.4	-0.527999999999999	31.3757	463.435	-0.40674	0.30371	0.023926	-41.049	97.804	1299.335	-1.666	0.94336	-0.37891	-30.393	112.2903	179.165	-0.003418	0.035156	0.010254	NaN	NaN	NaN	NaN	NaN	NaN
2.402	1.003	27.0791	456.71	-0.4248	0.31055	0.019531	-2.793	74.823	1316.9812	-1.6485	0.93261	-0.36289	-27.338	90.4036	152.0227	0.044922	0.01123	-0.00097656	NaN	NaN	NaN	NaN	NaN	NaN
2.404	-20.186	28.776	456.978	-0.43604	0.32154	0.018311	17.342	134.131	1304.249	-1.6312	0.91943	-0.35263	-53.941	60.461	114.9685	0.080566	-0.0034179	-0.0080566	NaN	NaN	NaN	NaN	NaN	NaN
2.406	8.712	39.12	470.327	-0.44629	0.33008	0.01709	-16.919	120.7	1296.338	-1.6061	0.91162	-0.3417	-69.189	43.9848	120.747	0.11377	-0.012207	-0.015625	NaN	NaN	NaN	NaN	NaN	NaN
2.408	14.147	57.126	479.438	-0.46045	0.33545	0.01416	32.28	117.4658	1289.81	-1.5916	0.89434	-0.33105	-56.4863	34.814	123.536	0.14795	-0.025391	-0.033203	NaN	NaN	NaN	NaN	NaN	NaN
2.41	26.308	55.574	490.549	-0.46484	0.34131	0.01123	-1.54	156.175	1253.918	-1.5737	0.87354	-0.31396	-55.456	31.23286	116.411	0.16699	-0.033203	-0.034668	NaN	NaN	NaN	NaN	NaN	NaN
2.412	9.193	41.903	512.909	-0.46924	0.35986	0.0092773	11.384	125.822	1239.043	-1.5678	0.86152	-0.292	-57.303	42.479	109.189	0.18506	-0.038574	-0.043945	NaN	NaN	NaN	NaN	NaN	NaN
2.414	15.487	42.2948	530.266	-0.46948	0.36059	0.0058594	67.5438	166.25	1205.26	-1.559	0.84687	-0.28711	-48.271	34.943	92.168	0.20068	-0.050537	-0.049316	NaN	NaN	NaN	NaN	NaN	NaN
2.416	18.401	51.305	555.665	-0.47461	0.36426	0.0014648	14.515	195.006	1143.764	-1.5375	0.83242	-0.275	-24.309	49.993	75.508	0.20703	-0.056152	-0.049805	NaN	NaN	NaN	NaN	NaN	NaN
2.418	13.017	60.599	559.207	-0.47412	0.37305	-0.0039063	46.607	173.975	1133.2812	-1.5197	0.81347	-0.25713	-33.347	36.102	77.382	0.21289	-0.063965	-0.057617	NaN	NaN	NaN	NaN	NaN	NaN
2.42	41.811	54.124	567.297	-0.47803	0.37744	0	45.838	205.188	1105.0408	-1.5015	0.78955	-0.24365	-63.9326	63.364	51.469	0.20459	-0.071777	-0.0625	NaN	NaN	NaN	NaN	NaN	NaN
2.422	36.041	45.0429	578.794	-0.48438	0.37695	-0.0063477	7.519	175.999	1099.431	-1.4753	0.77568	-0.23955	-56.9009	38.892	47.3315	0.18896	-0.077637	-0.063477	NaN	NaN	NaN	NaN	NaN	NaN
2.424	39.397	53.072	565.7114	-0.48218	0.38428	-0.0085449	48.4326	153.9685	1083.618	-1.4457	0.75391	-0.22783	-14.544	49.73	45.778	0.18359	-0.077881	-0.065674	NaN	NaN	NaN	NaN	NaN	NaN
2.426	5.77399999999999	63.402	588.542	-0.48633	0.38965	-0.010254	41.1101	178.334	1048.161	-1.4106	0.73672	-0.22119	3.876	11.5747	75.964	0.17041	-0.08252	-0.065918	NaN	NaN	NaN	NaN	NaN	NaN
2.428	40.126	59.912	623.159	-0.49316	0.40381	-0.0097656	38.918	126.019	1048.367	-1.3714	0.71612	-0.20576	28.099	27.381	42.949	0.15039	-0.087891	-0.069824	NaN	NaN	NaN	NaN	NaN	NaN
2.43	33.192	53.952	634.602	-0.50195	0.40527	-0.010254	68.4484	162.5388	1002.974	-1.332	0.69531	-0.19775	26.719	0.33796	57.294	0.1377	-0.095215	-0.067871	NaN	NaN	NaN	NaN	NaN	NaN
2.432	21.346	63.282	645.782	-0.51904	0.42041	-0.016602	11.983	180.5212	951.163	-1.2904	0.67764	-0.18369	48.689	36.288	7.386	0.11523	-0.09668	-0.062012	NaN	NaN	NaN	NaN	NaN	NaN
2.434	25.688	62.8941	653.814	-0.53589	0.43237	-0.01416	36.654	149.109	940.508	-1.2525	0.65859	-0.18056	51.9021	-3.2271	21.6084	0.099363	-0.092041	-0.066406	NaN	NaN	NaN	NaN	NaN	NaN
2.436	25.535	70.0331	651.515	-0.55127	0.44385	-0.014648	32.411	192.0576	900.7164	-1.2096	0.63828	-0.1751	60.969	10.6852	4.222	0.089355	-0.087891	-0.065918	NaN	NaN	NaN	NaN	NaN	NaN
2.438	24.268	76.706	670.699	-0.58545	0.45703	-0.018555	-12.068	163.2246	887.808	-1.1695	0.61933	-0.1584	52.8392	-24.5938	25.7257	0.074707	-0.092285	-0.059082	NaN	NaN	NaN	NaN	NaN	NaN
2.44	0.451000000000001	77.222	672.675	-0.604	0.46533	-0.020508	22.246	164.5588	870.377	-1.1274	0.60303	-0.1499	92.9236	19.221	9.76829	0.063965	-0.092285	-0.061035	NaN	NaN	NaN	NaN	NaN	NaN
2.442	6.264	75.853	696.021	-0.64014	0.48535	-0.016602	-19.865	203.682	813.268	-1.0924	0.58653	-0.13916	71.76	2.2361	38.4888	0.049805	-0.077148	-0.064453	NaN	NaN	NaN	NaN	NaN	NaN
2.444	14.145	73.9488	709.874	-0.66699	0.49975	-0.020263	-22.368	147.6605	818.098	-1.0513	0.56836	-0.12481	55.043	44.99331	50.129	0.048584	-0.073242	-0.060546	NaN	NaN	NaN	NaN	NaN	NaN
2.446	25.831	83.819	723.97	-0.69531	0.51709	-0.029297	8.034	173.02011	769.511	-1.0111	0.55313	-0.1127	9.733	18.6967	62.941	0.044922	-0.074707	-0.060059	NaN	NaN	NaN	NaN	NaN	NaN
2.448	13.729	83.046	740.199	-0.73242	0.5459	-0.026855	-52.4205	176.204	698.2048	-0.97833	0.53731	-0.099222	9.704	50.71	39.402	0.043457	-0.064941	-0.063477	NaN	NaN	NaN	NaN	NaN	NaN
2.45	3.696	87.7997	744.215	-0.74805	0.55664	-0.029297	0.781999999999996	157.1908	663.2808	-0.93994	0.52393	-0.086914	8.355	25.584	38.849	0.035156	-0.062012	-0.065918	NaN	NaN	NaN	NaN	NaN	NaN
2.452	15.723	96.311	752.515	-0.77637	0.59473	-0.04248	2.243	196.27208	611.9542	-0.89979	0.51093	-0.075385	38.277	51.417	21.7994	0.027832	-0.050781	-0.063965	NaN	NaN	NaN	NaN	NaN	NaN
2.454	23.64	104.568	753.3504	-0.7981	0.61548	-0.043212	-54.1377	176.9153	599.3988	-0.86275	0.49931	-0.062785	-25.163	18.5003	46.474	0.017334	-0.04834	-0.064941	NaN	NaN	NaN	NaN	NaN	NaN
2.456	24.13	95.6841	773.857	-0.81445	0.63965	-0.050781	4.935	168.54021	603.699	-0.82331	0.48798	-0.053016	-55.579	40.889	-0.696199999999999	0.0043945	-0.038086	-0.06543	NaN	NaN	NaN	NaN	NaN	NaN
2.458	15.609	83.3956	784.079	-0.83008	0.66797	-0.054199	-22.803	194.231	547.98981	-0.78639	0.47547	-0.039441	-50.1278	15.1368	-0.95888	-0.0043945	-0.023438	-0.069824	NaN	NaN	NaN	NaN	NaN	NaN
2.46	40.7	98.0623	805.736	-0.83106	0.69409	-0.064941	-24.351	139.924	548.8118	-0.74561	0.46729	-0.029297	-37.995	37.118	21.7734	-0.013672	-0.01416	-0.071289	NaN	NaN	NaN	NaN	NaN	NaN
2.462	45.739	113.8537	811.365	-0.83496	0.70996	-0.069824	8.123	160.193	520.95	-0.70553	0.45821	-0.012397	-46.793	11.2266	70.068	-0.021484	0.0039063	-0.081055	NaN	NaN	NaN	NaN	NaN	NaN
2.464	36.9	131.441	820.696	-0.8374	0.73877	-0.078613	-35.986	167.518	476.39	-0.66766	0.44542	-0.0057194	-28.897	38.6812	51.884	-0.034912	0.02124	-0.084717	NaN	NaN	NaN	NaN	NaN	NaN
2.466	40.837	120.4891	845.719	-0.83154	0.75244	-0.082031	21.284	148.48	458.772	-0.62115	0.43494	0.0071917	-61.49064	13.91566	50.739	-0.041992	0.036621	-0.086914	NaN	NaN	NaN	NaN	NaN	NaN
2.468	48.76	121.2619	845.006	-0.8335	0.77686	-0.086426	24.944	184.805	405.9092	-0.58394	0.42378	0.018993	-56.9784	42.2619	34.917	-0.046875	0.056641	-0.10156	NaN	NaN	NaN	NaN	NaN	NaN
2.47	63.051	123.2305	840.507	-0.82885	0.79419	-0.092286	-16.246	158.294	391.1244	-0.54102	0.41113	0.032227	-80.0656	11.038	57.091	-0.048828	0.066895	-0.10352	NaN	NaN	NaN	NaN	NaN	NaN
2.472	42.3	134.5649	842.2247	-0.82715	0.81152	-0.098145	33.706	126.93	404.701	-0.4967	0.40026	0.042825	-52.687	19.9927	58.733	-0.051758	0.084473	-0.10986	NaN	NaN	NaN	NaN	NaN	NaN
2.474	66.16	139.604	851.083	-0.81445	0.83984	-0.10791	21.037	142.2356	360.266	-0.45653	0.38673	0.049411	-42.404	1.131	30.41393	-0.046631	0.096435	-0.11621	NaN	NaN	NaN	NaN	NaN	NaN
2.476	54.527	150.107	867.458	-0.80469	0.84766	-0.11719	20.876	97.6331	349.965	-0.40678	0.37847	0.05765	0.0839999999999961	21.0271	23.996	-0.036621	0.11475	-0.11768	NaN	NaN	NaN	NaN	NaN	NaN
2.478	64.055	155.928	864.7612	-0.79297	0.86523	-0.11963	67.3893	114.593	331.616	-0.35992	0.36905	0.066908	-18.339	-6.06904	42.846	-0.038574	0.13574	-0.12207	NaN	NaN	NaN	NaN	NaN	NaN
2.48	55.574	151.9969	883.686	-0.7771	0.88013	-0.12671	10.788	115.542	288.468	-0.31592	0.35596	0.072754	-5.904	19.476	58.892	-0.030273	0.14404	-0.12158	NaN	NaN	NaN	NaN	NaN	NaN
2.482	61.787	159.8015	892.607	-0.76758	0.89844	-0.1333	49.5951	94.551	274.708	-0.27002	0.34696	0.079483	9.104	11.396	39.203	-0.020508	0.16797	-0.12451	NaN	NaN	NaN	NaN	NaN	NaN
2.484	66.555	156.7058	909.671	-0.76318	0.91064	-0.13916	37.815	117.59	224.6125	-0.2206	0.33694	0.083214	43.734	18.361	22.0531	-0.014404	0.17603	-0.12232	NaN	NaN	NaN	NaN	NaN	NaN
2.486	36.26	177.901	900.091	-0.76367	0.91992	-0.14551	2.565	103.558	204.9315	-0.17696	0.31912	0.093785	51.526	10.4618	11.554	-0.0019531	0.18652	-0.12207	NaN	NaN	NaN	NaN	NaN	NaN
2.488	49.606	163.2276	902.858	-0.78516	0.92773	-0.14746	53.132	103.905	222.303	-0.12275	0.3044	0.098473	71.474	21.1302	41.523	0.010254	0.19971	-0.12793	NaN	NaN	NaN	NaN	NaN	NaN
2.49	40.025	170.741	898.932	-0.80323	0.94141	-0.14868	7.286	121.947	204.672	-0.058105	0.29443	0.096191	51.806	31.7128	18.9294	0.019531	0.20801	-0.12744	NaN	NaN	NaN	NaN	NaN	NaN
2.492	45.851	180.963	893.5356	-0.82764	0.95557	-0.15137	6.089	85.238	205.667	0.006818	0.27594	0.10115	67.2967	36.892	23.7187	0.038086	0.21875	-0.13184	NaN	NaN	NaN	NaN	NaN	NaN
2.494	30.016	183.477	906.703	-0.85107	0.97998	-0.15332	15.628	91.038	186.86	0.073404	0.26095	0.10203	44.95	38.624	18.13355	0.049805	0.22851	-0.13086	NaN	NaN	NaN	NaN	NaN	NaN
2.496	42.391	178.685	908.957	-0.86914	0.98828	-0.15186	-37.5763	75.184	168.025	0.13525	0.24581	0.10398	32.904	19.4572	57.757	0.067871	0.23633	-0.13525	NaN	NaN	NaN	NaN	NaN	NaN
2.498	35.973	181.6659	930.818	-0.89648	1.0078	-0.15771	-6.622	50.205	184.123	0.20072	0.22828	0.10719	46.646	20.2833	55.168	0.081055	0.24219	-0.14551	NaN	NaN	NaN	NaN	NaN	NaN
2.5	20.587	204.711	918.344	-0.90478	1.0205	-0.16015	-7.708	53.7555	135.434	0.25195	0.21143	0.10449	42.6035	9.423	39.081	0.094238	0.24609	-0.14453	NaN	NaN	NaN	NaN	NaN	NaN
2.502	44.023	213.002	918.316	-0.91406	1.0332	-0.16162	-32.307	42.07	94.7755	0.298	0.19817	0.10974	32.949	8.3233	18.4198	0.10889	0.25244	-0.14844	NaN	NaN	NaN	NaN	NaN	NaN
2.504	23.622	214.3	903.622	-0.91455	1.0376	-0.16748	1.586	33.8196	88.8601	0.33681	0.18499	0.11586	11.371	-5.027	32.243	0.1145	0.25562	-0.15479	NaN	NaN	NaN	NaN	NaN	NaN
2.506	42.22	213.98	900.222	-0.91797	1.0449	-0.16846	-31.251	49.7457	83.384	0.36384	0.17073	0.11961	3.075	1.8223	26.7221	0.11475	0.26172	-0.1543	NaN	NaN	NaN	NaN	NaN	NaN
2.508	23.659	225.861	892.0387	-0.9126	1.0522	-0.17236	-29.133	31.428	118.709	0.394	0.16039	0.1247	-32.336	-9.7541	50.05749	0.09668	0.26563	-0.16113	NaN	NaN	NaN	NaN	NaN	NaN
2.51	20.054	235.124	894.972	-0.90405	1.0539	-0.17188	25.79	39.286	112.75	0.40625	0.14893	0.13086	-10.673	-0.168999999999999	33.0795	0.088379	0.26709	-0.1582	NaN	NaN	NaN	NaN	NaN	NaN
2.512	37.435	227.013	909.071	-0.89404	1.0513	-0.16748	-39.7006	25.726	89.117	0.41291	0.14036	0.1339	-42.3182	-17.009	78.983	0.040039	0.27002	-0.15771	NaN	NaN	NaN	NaN	NaN	NaN
2.514	39.204	231.418	894.16	-0.88281	1.0566	-0.17383	-0.386000000000003	12.73635	117.925	0.4066	0.12339	0.14547	-59.4648	-2.888	113.214	-0.0063475	0.26562	-0.15601	NaN	NaN	NaN	NaN	NaN	NaN
2.516	55.384	227.977	894.4572	-0.87109	1.0547	-0.17188	5.817	38.2284	92.826	0.39718	0.10978	0.15486	-45.4177	-17.178	158.377	-0.061523	0.26611	-0.15674	NaN	NaN	NaN	NaN	NaN	NaN
2.518	19.197	232.17	900.8637	-0.85498	1.0552	-0.1748	-29.41	41.548	60.824	0.37746	0.10433	0.15828	-45.851	5.544	164.207	-0.14551	0.26855	-0.15674	NaN	NaN	NaN	NaN	NaN	NaN
2.52	62.615	234.333	909.796	-0.84448	1.053	-0.17383	36.917	46.9222	40.5891	0.35645	0.098633	0.1626	-39.794	-6.764	216.528	-0.18652	0.27295	-0.15674	NaN	NaN	NaN	NaN	NaN	NaN
2.522	58.986	240.197	924.986	-0.83398	1.0469	-0.17334	-10.386	52.805	13.413	0.33526	0.099046	0.16425	-17.561	3.834	258.5343	-0.27783	0.28662	-0.1499	NaN	NaN	NaN	NaN	NaN	NaN
2.524	61.497	262.901	927.5489	-0.83105	1.0498	-0.17383	8.46	10.4597	39.484	0.30585	0.09375	0.16947	-26.935	-14.4463	324.72	-0.3584	0.29834	-0.15454	NaN	NaN	NaN	NaN	NaN	NaN
2.526	50.241	279.715	961.172	-0.8418	1.0508	-0.17236	60.937	16.2365	42.895	0.28088	0.094143	0.17687	-30.704	16.9256	383.6105	-0.44092	0.31494	-0.14502	NaN	NaN	NaN	NaN	NaN	NaN
2.528	65.967	296.3079	1012.714	-0.88477	1.0664	-0.17383	16.485	6.5738	37.415	0.24977	0.084181	0.179	-53.726	26.8335	474.7541	-0.57324	0.3418	-0.14111	NaN	NaN	NaN	NaN	NaN	NaN
2.53	86.091	320.618	1030.488	-0.93188	1.0793	-0.1648	51.307	-4.313	67.019	0.21924	0.079102	0.18311	-68.48	70.031	584.8442	-0.6416	0.35205	-0.13379	NaN	NaN	NaN	NaN	NaN	NaN
2.532	69.052	319.516	1060.9713	-0.98779	1.0962	-0.16162	46.819	14.6459	58.159	0.18558	0.079683	0.18359	-86.732	59.7141	696.247	-0.80762	0.38232	-0.11084	NaN	NaN	NaN	NaN	NaN	NaN
2.534	78.478	316.168	1087.917	-1.0918	1.1172	-0.16016	5.724	11.9099	33.626	0.14837	0.084658	0.18632	-51.735	87.508	760.107	-0.94873	0.40943	-0.096922	NaN	NaN	NaN	NaN	NaN	NaN
2.536	77.147	315.747	1104.772	-1.1401	1.1353	-0.16113	64.9198	20.9138	5.2303	0.1179	0.086626	0.19296	-71.63	69.0195	861.339	-1.0991	0.43359	-0.077148	NaN	NaN	NaN	NaN	NaN	NaN
2.538	88.828	327.421	1121.238	-1.2441	1.1582	-0.14893	27.512	34.001	-9.6691	0.094641	0.094433	0.1914	-45.4792	78.54	946.5384	-1.3296	0.48291	-0.050293	NaN	NaN	NaN	NaN	NaN	NaN
2.54	101.567	321.777	1098.213	-1.3171	1.1741	-0.14111	11.668	-3.8496	31.56272	0.066406	0.098633	0.19043	-45.6794	31.53	1035.7018	-1.4507	0.50342	-0.034668	NaN	NaN	NaN	NaN	NaN	NaN
2.542	115.219	294.071	1094.224	-1.3765	1.1899	-0.13428	35.754	14.6097	42.355	0.046872	0.10107	0.19014	-17.179	26.52	1087.177	-1.6934	0.54297	0.0053711	NaN	NaN	NaN	NaN	NaN	NaN
2.544	125.235	265.813	1101.587	-1.4287	1.2129	-0.12988	1.267	20.2904	29.2939	0.026851	0.10088	0.19219	-9.089	-29.775	1110.421	-1.938	0.58643	0.057617	NaN	NaN	NaN	NaN	NaN	NaN
2.546	112.402	243.138	1109.952	-1.4409	1.2231	-0.12939	24.482	5.9707	38.964	0.011618	0.104	0.18711	39.775	-69.394	1093.571	-2.0503	0.60889	0.089844	NaN	NaN	NaN	NaN	NaN	NaN
2.548	121.764	222.981	1129.561	-1.4277	1.2305	-0.12354	13.072	27.0262	33.334	-0.0040059	0.10654	0.18653	38.5338	-159.208	1108.086	-2.2632	0.63721	0.1123	NaN	NaN	NaN	NaN	NaN	NaN
2.55	108.133	194.0135	1119.872	-1.3953	1.2253	-0.12451	-22.473	20.55729	35.289	-0.018555	0.10889	0.17969	51.0599	-181.1812	1093.257	-2.3748	0.68091	0.10693	NaN	NaN	NaN	NaN	NaN	NaN
2.552	126.286	172.0691	1110.184	-1.355	1.2173	-0.12451	18.319	33.387	32.5168	-0.027733	0.11719	0.17744	20.1155	-201.777	1070.631	-2.4341	0.73682	0.084473	NaN	NaN	NaN	NaN	NaN	NaN
2.554	116.86	147.1319	1105.711	-1.291	1.1953	-0.11523	-19.944	54.601	-1.8326	-0.034081	0.1207	0.17383	-8.8188	-181.4647	1038.276	-2.3984	0.8252	0.089844	NaN	NaN	NaN	NaN	NaN	NaN
2.556	107.472	134.1706	1089.87	-1.2578	1.1787	-0.10742	-24.564	23.4611	22.2018	-0.040332	0.12813	0.16641	-79.785	-182.714	1010.617	-2.3496	0.875	0.064941	NaN	NaN	NaN	NaN	NaN	NaN
2.558	100.313	120.66331	1095.232	-1.1953	1.1514	-0.098633	-7.276	31.91	22.169	-0.041211	0.1288	0.16494	-103.396	-140.507	996.6584	-2.1719	0.92969	0.071777	NaN	NaN	NaN	NaN	NaN	NaN
2.56	109.361	122.546	1091.02	-1.1456	1.1313	-0.096191	-37.396	30.6793	26.868	-0.036133	0.13086	0.16357	-107.79	-102.06	977.0907	-1.9743	0.90844	0.041992	NaN	NaN	NaN	NaN	NaN	NaN
2.562	110.03	111.628	1102.951	-1.0991	1.106	-0.089844	17.163	20.2573	43.748	-0.030859	0.13672	0.15645	-100.274	-33.829	1007.0163	-1.7422	0.85938	-0.0058594	NaN	NaN	NaN	NaN	NaN	NaN
2.564	95.256	97.7323	1128.755	-1.0391	1.083	-0.071289	-21.94	37.1028	41.763	-0.021387	0.14014	0.15068	-124.54	-31.47	1043.851	-1.4277	0.74561	-0.070313	NaN	NaN	NaN	NaN	NaN	NaN
2.566	115.969	70.8532	1129.38	-1.0132	1.0757	-0.064453	-42.5874	30.329	60.888	-0.0045896	0.14209	0.14912	-125.991	-40.464	1091.881	-1.291	0.67773	-0.099121	NaN	NaN	NaN	NaN	NaN	NaN
2.568	73.522	71.006	1123.653	-0.9707	1.0488	-0.052734	14.67	9.1735	69.25	0.0075197	0.14463	0.14228	-132.11	-84.317	1095.4	-1.0762	0.58398	-0.12793	NaN	NaN	NaN	NaN	NaN	NaN
2.57	94.661	72.071	1104.9848	-0.94311	1.0402	-0.044433	-28.839	30.2037	43.96	0.023438	0.14941	0.1377	-63.9705	-117.196	1117.05	-0.97242	0.5979	-0.15234	NaN	NaN	NaN	NaN	NaN	NaN
2.572	51.921	53.689	1111.983	-0.91504	1.0293	-0.036133	0.258000000000003	11.1949	32.2641	0.038574	0.15215	0.13809	-56.915	-170.202	1105.1215	-0.96094	0.6582	-0.19824	NaN	NaN	NaN	NaN	NaN	NaN
2.574	57.931	43.7202	1113.2405	-0.89551	1.0176	-0.03418	36.904	27.1061	37.954	0.054785	0.15791	0.13515	-39.742	-190.105	1141.1522	-0.99805	0.73975	-0.24561	NaN	NaN	NaN	NaN	NaN	NaN
2.576	39.977	21.5846	1120.086	-0.89014	1.0103	-0.03418	-20.124	23.9477	27.9759	0.068848	0.16221	0.13594	-49.686	-241.751	1146.758	-1.0171	0.77979	-0.2627	NaN	NaN	NaN	NaN	NaN	NaN
2.578	4.823	-0.292999999999999	1115.126	-0.88867	1.0059	-0.021484	17.193	-2.9068	57.254	0.081152	0.16406	0.12949	-68.60021	-248.734	1199.321	-1.0444	0.81689	-0.25146	NaN	NaN	NaN	NaN	NaN	NaN
2.58	-15.529	-40.3654	1139.983	-0.89575	1.0041	-0.020264	22.371	27.958	44.793	0.089844	0.17188	0.1333	-72.537943	-298.854	1258.531	-1.0972	0.81592	-0.24072	NaN	NaN	NaN	NaN	NaN	NaN
2.582	-24.072	-58.33907	1132.217	-0.9082	1.0039	-0.020508	6.077	4.197	68.327	0.098533	0.17968	0.13164	-68.1831	-290.489	1338.76	-1.1777	0.81543	-0.23145	NaN	NaN	NaN	NaN	NaN	NaN
2.584	-20.40203	-74.0178	1115.313	-0.91162	1.0083	-0.010254	68.3719	-1.9461	85.99	0.11006	0.18692	0.12685	-39.648	-304.308	1412.019	-1.3101	0.83447	-0.22656	NaN	NaN	NaN	NaN	NaN	NaN
2.586	-42.4134	-95.672	1101.697	-0.91211	1.0098	-0.0073242	34.694	29.149	52.102	0.11787	0.19902	0.12959	-13.819	-264.909	1488.959	-1.3726	0.83447	-0.20898	NaN	NaN	NaN	NaN	NaN	NaN
2.588	-38.85	-126.6761	1072.094	-0.90625	1.0117	-0.0043945	19.483	17.1691	36.5944	0.12334	0.2125	0.12178	-22.323	-225.071	1498.906	-1.4839	0.86182	-0.18701	NaN	NaN	NaN	NaN	NaN	NaN
2.59	-45.978	-151.8218	1051.717	-0.90454	1.0169	0.003418	60.07969	31.6818	29.31303	0.12842	0.22217	0.12109	-12.331	-166.5556	1539.894	-1.5593	0.87622	-0.18603	NaN	NaN	NaN	NaN	NaN	NaN
2.592	-63.589	-150.654	1019.3373	-0.896	1.019	0.010742	5.272	13.1819	45.1764	0.12832	0.23252	0.11885	42.098	-133.026	1544.681	-1.6323	0.89502	-0.18896	NaN	NaN	NaN	NaN	NaN	NaN
2.594	-57.488	-165.6792	1027.166	-0.88818	1.0181	0.024902	39.432	-39.66571	78.149	0.12695	0.2419	0.11055	71.368	-95.941	1555.46	-1.7188	0.90625	-0.18457	NaN	NaN	NaN	NaN	NaN	NaN
2.596	-68.212	-164.591	1019.168	-0.88379	1.0215	0.023438	27.102	-38.5933	73.508	0.12071	0.25518	0.10704	86.5295	-101.931	1524.951	-1.7715	0.90625	-0.18164	NaN	NaN	NaN	NaN	NaN	NaN
2.598	-69.408	-164.3565	1009.997	-0.86719	1.0234	0.039063	-2.308	-52.4083	80.544	0.11797	0.27178	0.10283	75.7741	-99.313	1533.8115	-1.8608	0.91553	-0.18701	NaN	NaN	NaN	NaN	NaN	NaN
2.6	-67.595	-164.549	984.343	-0.83887	1.0234	0.054199	35.207	-62.6765	117.11	0.10791	0.28027	0.097656	102.892	-97.496	1543.7594	-1.9258	0.90869	-0.19165	NaN	NaN	NaN	NaN	NaN	NaN
2.602	-64.043	-156.288	963.977	-0.83398	1.0273	0.057617	-14.125	-34.3065	115.31	0.0959	0.29815	0.085742	46.5846	-93.251	1575.6611	-1.978	0.90674	-0.19678	NaN	NaN	NaN	NaN	NaN	NaN
2.604	-64.217	-145.653	943.44	-0.81787	1.0317	0.069336	-24.3015	-50.526	134.7395	0.080176	0.30879	0.080175	51.4058	-101.251	1571.168	-2.0386	0.90869	-0.20996	NaN	NaN	NaN	NaN	NaN	NaN
2.606	-77.205	-136.458	932.766	-0.81885	1.0371	0.073731	-3.728	-30.269	145.33	0.058301	0.32636	0.075098	30.452	-126.429	1596.992	-2.0659	0.91455	-0.21729	NaN	NaN	NaN	NaN	NaN	NaN
2.608	-63.825	-144.125	939.9353	-0.82031	1.0391	0.075195	-59.906	-7.8839	195.055	0.031348	0.33554	0.071289	28.619	-125.563	1631.419	-2.1113	0.93164	-0.22998	NaN	NaN	NaN	NaN	NaN	NaN
2.61	-76.194	-153.281	946.9047	-0.82764	1.0532	0.084473	-30.9715	-20.3014	301.88	-0.00048828	0.35156	0.061523	-16.487	-121.505	1704.27	-2.1402	0.94091	-0.24341	NaN	NaN	NaN	NaN	NaN	NaN
2.612	-56.819	-165.73	966.594	-0.83594	1.0566	0.087402	-23.879	22.3249	383.276	-0.037012	0.36377	0.061816	5.201	-95.0821	1695.842	-2.1577	0.94971	-0.25488	NaN	NaN	NaN	NaN	NaN	NaN
2.614	-60.637	-162.392	966.9978	-0.84473	1.0605	0.078125	-29.962	48.291	460.8453	-0.073243	0.38047	0.060059	-13.31	-102.946	1729.489	-2.1616	0.93994	-0.27344	NaN	NaN	NaN	NaN	NaN	NaN
2.616	-20.212	-171.517	978.283	-0.84351	1.0652	0.07544	23.884	62.638	582.3072	-0.10996	0.4	0.056152	-19.503	-92.256	1733.653	-2.1621	0.94141	-0.28516	NaN	NaN	NaN	NaN	NaN	NaN
2.618	-46.857	-175.845	977.45	-0.84473	1.0728	0.069824	-18.193	108.597	676.351	-0.15225	0.42256	0.051367	-45.889	-130.454	1720.469	-2.146	0.93994	-0.30518	NaN	NaN	NaN	NaN	NaN	NaN
2.62	-47.42	-186.309	983.125	-0.83789	1.0781	0.059082	17.361	100.987	811.8575	-0.20459	0.44922	0.049805	-2.849	-120.083	1687.87	-2.125	0.92431	-0.31689	NaN	NaN	NaN	NaN	NaN	NaN
2.622	-56.333	-199.2729	996.018	-0.84033	1.0845	0.054688	55.376	111.736	877.377	-0.28496	0.47802	0.047851	-13.194	-104.3647	1682.697	-2.1069	0.91357	-0.33398	NaN	NaN	NaN	NaN	NaN	NaN
2.624	-44.001	-213.5219	1013.168	-0.83594	1.0898	0.044434	-8.01300000000001	103.248	915.09	-0.3834	0.50781	0.048535	-18.574	-38.884	1671.086	-2.084	0.88477	-0.33496	NaN	NaN	NaN	NaN	NaN	NaN
2.626	-30.42	-217.001	1039.764	-0.8396	1.0926	0.037353	40.432	39.0439	1010.441	-0.50137	0.5375	0.056738	-63.89686	-34.545	1680.33	-2.0757	0.86963	-0.33447	NaN	NaN	NaN	NaN	NaN	NaN
2.628	-51.641	-196.989	1029.995	-0.84131	1.0942	0.032715	37.523	-5.996	1068.392	-0.6456	0.57041	0.062305	-58.042	1.53	1648.2029	-2.0879	0.86621	-0.35059	NaN	NaN	NaN	NaN	NaN	NaN
2.63	-55.831	-174.9218	1028.4607	-0.84521	1.0962	0.026855	22.204	-76.856	1088.629	-0.8125	0.60449	0.070801	-79.5705	-8.96014	1631.603	-2.0923	0.85498	-0.35229	NaN	NaN	NaN	NaN	NaN	NaN
2.632	-64.547	-151.867	1027.456	-0.84717	1.0942	0.025391	99.534	-139.9654	1103.727	-1.0103	0.6417	0.082227	-85.619	43.286	1618.008	-2.1011	0.85205	-0.34912	NaN	NaN	NaN	NaN	NaN	NaN
2.634	-55.641	-148.237	1024.597	-0.83984	1.0996	0.020508	97.7872	-153.5082	1087.171	-1.223	0.67461	0.092481	-57.9079	42.8095	1628.8553	-2.1406	0.83691	-0.34424	NaN	NaN	NaN	NaN	NaN	NaN
2.636	-55.986	-146.2	1026.012	-0.83374	1.1009	0.025147	115.0539	-186.319	1084.506	-1.4449	0.70547	0.10459	-28.896	89.808	1634.105	-2.1504	0.8418	-0.34863	NaN	NaN	NaN	NaN	NaN	NaN
2.638	-52.064	-132.057	1042.198	-0.81885	1.0923	0.013672	147.4666	-168.871	1068.272	-1.6712	0.7374	0.10947	-28.752	62.167	1678.776	-2.1738	0.8418	-0.33643	NaN	NaN	NaN	NaN	NaN	NaN
2.64	-48.837	-136.817	1065.652	-0.8042	1.0864	0.02002	112.93	-114.281	991.867	-1.8784	0.77295	0.11523	-10.731	68.594	1656.564	-2.1738	0.8501	-0.3313	NaN	NaN	NaN	NaN	NaN	NaN
2.642	-64.319	-137.693	1075.844	-0.79883	1.084	0.015625	156.551	-86.345	988.9117	-2.0349	0.80468	0.12256	25.683	24.9466	1654.678	-2.1621	0.86523	-0.33984	NaN	NaN	NaN	NaN	NaN	NaN
2.644	-66.12	-128.111	1046.1346	-0.79443	1.0835	0.011719	164.6841	-49.934	1003.231	-2.1356	0.84219	0.11689	73.9062	39.58494	1653.734	-2.1406	0.86133	-0.375	NaN	NaN	NaN	NaN	NaN	NaN
2.646	-89.639	-127.056	1042.3955	-0.80371	1.0786	0.01416	126.578	-35.177	999.826	-2.159	0.88437	0.10205	80.3906	22.0944	1648.049	-2.1187	0.84424	-0.38135	NaN	NaN	NaN	NaN	NaN	NaN
2.648	-78.007	-127.846	1045.224	-0.82178	1.0747	0.021973	142.7991	-39.974	1019.574	-2.0813	0.95117	0.088672	78.8249	79.417	1638.703	-2.0898	0.80664	-0.38574	NaN	NaN	NaN	NaN	NaN	NaN
2.65	-64.608	-147.374	1041.063	-0.86279	1.0845	0.021484	106.864	13.723	1002.668	-1.9272	1.0317	0.060547	75.8673	56.368	1606.416	-2.0759	0.80054	-0.38648	NaN	NaN	NaN	NaN	NaN	NaN
2.652	-78.635	-143.724	1044.315	-0.88477	1.0781	0.029297	76.6033	7.215	997.319	-1.6856	1.08	0.03125	72.875	49.953	1596.989	-2.0605	0.79004	-0.3877	NaN	NaN	NaN	NaN	NaN	NaN
2.654	-59.061	-167.9003	1064.783	-0.92041	1.0864	0.03418	81.4828	-10.161	981.5867	-1.4006	1.0754	0.0041016	69.937	11.292	1591.547	-2.0347	0.78564	-0.38428	NaN	NaN	NaN	NaN	NaN	NaN
2.656	-71.764	-182.341	1083.138	-0.9375	1.0894	0.035889	35.59	-16.8	917.581	-1.1174	1.0039	-0.012304	62.716	53.784	1567.406	-2.019	0.78467	-0.38037	NaN	NaN	NaN	NaN	NaN	NaN
2.658	-49.249	-170.5276	1065.259	-0.94727	1.0869	0.043457	18.333	-106.143	932.224	-0.88925	0.90918	-0.040234	89.51	93.98	1557.28	-1.9629	0.7666	-0.38867	NaN	NaN	NaN	NaN	NaN	NaN
2.66	-45.709	-147.2453	1033.7087	-0.93945	1.0723	0.044434	-4.732	-172.025	991.0068	-0.71631	0.80322	-0.074707	56.142	169.304	1548.479	-1.9288	0.74707	-0.39283	NaN	NaN	NaN	NaN	NaN	NaN
2.662	-32.7995	-128.1552	1019.9085	-0.93213	1.0669	0.040039	-70.676	-218.569	1027.243	-0.5874	0.71846	-0.10049	67.159	187.2	1506.98	-1.8809	0.72656	-0.37695	NaN	NaN	NaN	NaN	NaN	NaN
2.664	-39.44544	-106.37	1026.501	-0.9082	1.0488	0.036133	-47.449	-292.179	1093.757	-0.50342	0.67666	-0.1418	47.033	203.081	1501.865	-1.8125	0.69336	-0.38184	NaN	NaN	NaN	NaN	NaN	NaN
2.666	-25.3395	-106.122	1012.861	-0.88305	1.031	0.033203	-74.549	-277.122	1111.016	-0.46943	0.66377	-0.16797	55.692	192.171	1417.491	-1.7769	0.68604	-0.37842	NaN	NaN	NaN	NaN	NaN	NaN
2.668	-19.2878	-104.18	1006.619	-0.85547	1.0117	0.034668	-123.089	-295.157	1125.689	-0.44756	0.67881	-0.1627	27.243	198.034	1418.787	-1.7227	0.67188	-0.37695	NaN	NaN	NaN	NaN	NaN	NaN
2.67	-25.6666	-114.187	994.703	-0.82373	0.98584	0.030762	-83.38	-264.151	1149.01	-0.46533	0.71143	-0.15234	31.705	199.388	1392.9566	-1.6801	0.65185	-0.3706	NaN	NaN	NaN	NaN	NaN	NaN
2.672	-26.7216	-120.9981	988.515	-0.80811	0.9751	0.026855	-122.077	-164.7685	1152.652	-0.53047	0.77637	-0.15801	-21.236	207.935	1406.957	-1.6328	0.63184	-0.3584	NaN	NaN	NaN	NaN	NaN	NaN
2.674	-14.4464	-102.3262	962.137	-0.771	0.95654	0.030762	-107.312	-142.6561	1216.0077	-0.57539	0.83594	-0.16651	-17.866	188.291	1355.237	-1.5835	0.61182	-0.3418	NaN	NaN	NaN	NaN	NaN	NaN
2.676	-14.155	-89.6632	939.3816	-0.74341	0.93994	0.02832	-91.18	-109.63	1269.134	-0.61172	0.84649	-0.17197	-45.4446	172.3335	1349.465	-1.5566	0.60156	-0.33789	NaN	NaN	NaN	NaN	NaN	NaN
2.678	-23.1016	-84.9408	929.0539	-0.72021	0.92236	0.022949	-122.586	-80.241	1252.59	-0.69414	0.85039	-0.16348	-63.032	165.7332	1271.651	-1.5137	0.59082	-0.32813	NaN	NaN	NaN	NaN	NaN	NaN
2.68	-5.717	-92.5988	923.415	-0.68164	0.90137	0.020996	-73.869	-134.563	1296.178	-0.82764	0.854	-0.15771	-90.083	171.865	1261.0329	-1.4585	0.56006	-0.30811	NaN	NaN	NaN	NaN	NaN	NaN
2.682	-0.494	-109.8143	928.196	-0.66309	0.88867	0.019043	-61.888	-84.924	1292.27	-0.99298	0.88067	-0.15654	-77.6491	202.3473	1196.5048	-1.4351	0.55322	-0.30029	NaN	NaN	NaN	NaN	NaN	NaN
2.684	-0.650599999999999	-115.1808	930.266	-0.61377	0.86768	0.014648	-82.603	-81.827	1280.8476	-1.1441	0.91074	-0.15313	-91.5409	226.1376	1178.702	-1.3667	0.53564	-0.27979	NaN	NaN	NaN	NaN	NaN	NaN
2.686	-18.5585	-110.65845	944.799	-0.5896	0.85303	0.011963	-30.72	-99.746	1306.2651	-1.2766	0.95176	-0.15313	-45.16	249.684	1146.077	-1.3318	0.52344	-0.271	NaN	NaN	NaN	NaN	NaN	NaN
2.688	-25.0257	-101.4802	915.857	-0.56836	0.83496	0.003418	-45.5973	-52.173	1288.249	-1.3935	0.98468	-0.14424	-37.872	228.989	1155.608	-1.2852	0.5	-0.25781	NaN	NaN	NaN	NaN	NaN	NaN
2.69	-17.621	-87.86586	871.31	-0.54004	0.81445	0.0092773	-24.53867	-122.117	1356.183	-1.4897	1.0288	-0.14355	-40.004	246.92	1077.8207	-1.2358	0.48096	-0.23291	NaN	NaN	NaN	NaN	NaN	NaN
2.692	-36.596	-78.3858	836.9321	-0.52686	0.80273	0.0039063	15.025	-143.942	1409.8842	-1.5679	1.0656	-0.14121	-30.406	253.828	1072.128	-1.207	0.46875	-0.22656	NaN	NaN	NaN	NaN	NaN	NaN
2.694	-38.1835	-78.1428	831.089	-0.50537	0.79004	0.0029297	-8.363	-120.19	1424.449	-1.6422	1.1059	-0.1332	-0.667999999999999	297.506	1002.509	-1.1597	0.45166	-0.20654	NaN	NaN	NaN	NaN	NaN	NaN
2.696	-36.475	-82.4006	831.246	-0.48853	0.78027	-0.00024414	68.2143	-173.204	1495.4	-1.7067	1.1336	-0.12383	-11.412	306.884	995.802	-1.1172	0.43896	-0.19116	NaN	NaN	NaN	NaN	NaN	NaN
2.698	-35.055	-65.385	830.043	-0.47607	0.76807	-0.0039063	55.1515	-110.7257	1500.6	-1.7595	1.1593	-0.11485	-1.723	323.346	934.344	-1.0718	0.42432	-0.17969	NaN	NaN	NaN	NaN	NaN	NaN
2.7	-42.3658	-64.283	821.023	-0.45801	0.75635	-0.0024414	29.2625	-121.389	1511.987	-1.8022	1.1743	-0.10986	-8.199	275.091	879.823	-1.0127	0.40576	-0.15967	NaN	NaN	NaN	NaN	NaN	NaN
2.702	-43.616	-59.326	807.643	-0.45117	0.75098	-0.0024414	92.212	-144.627	1545.812	-1.8322	1.1881	-0.10927	19.476	270.225	819.779	-0.97314	0.40088	-0.15771	NaN	NaN	NaN	NaN	NaN	NaN
2.704	-33.344	-58.5099	779.117	-0.43799	0.73682	-0.0073242	73.206	-76.408	1522.7478	-1.8504	1.1933	-0.10625	7.568	225.945	799.4635	-0.91309	0.39063	-0.13281	NaN	NaN	NaN	NaN	NaN	NaN
2.706	-41.5121	-38.894	740.0249	-0.43213	0.72583	-0.0083008	74.3306	-113.453	1540.0442	-1.8601	1.1852	-0.10391	9.59	247.104	758.2212	-0.85693	0.37695	-0.12158	NaN	NaN	NaN	NaN	NaN	NaN
2.708	-36.1515	-31.367	722.58618	-0.4209	0.7168	-0.0078125	57.3622	-76.8578	1542.179633	-1.8589	1.1704	-0.09248	23.227	235.178	765.005	-0.7998	0.3667	-0.10742	NaN	NaN	NaN	NaN	NaN	NaN
2.71	-51.0917	-16.255	710.146	-0.40723	0.70117	-0.0097656	5.693	-0.379000000000005	1506.7039	-1.8477	1.1523	-0.078125	73.6322	267.389	724.281	-0.73779	0.34473	-0.094727	NaN	NaN	NaN	NaN	NaN	NaN
2.712	-26.6259	-26.449	693.1371	-0.40576	0.69873	-0.016602	33.324	-40.7034	1516.9082	-1.8475	1.1263	-0.069043	73.3513	224.9595	709.432	-0.70313	0.33203	-0.086426	NaN	NaN	NaN	NaN	NaN	NaN
2.714	-41.7465	-37.777	698.999	-0.39355	0.68066	-0.015137	15.222	22.3598	1511.2176	-1.8567	1.1039	-0.056348	43.192	230.698	663.898	-0.63477	0.32031	-0.066895	NaN	NaN	NaN	NaN	NaN	NaN
2.716	-37.0918	-47.4776	697.758	-0.38232	0.66699	-0.015869	-17.526	11.3071	1505.7622	-1.8675	1.0883	-0.049317	18.446	208.2739	607.511	-0.58984	0.30322	-0.054199	NaN	NaN	NaN	NaN	NaN	NaN
2.718	-21.1435	-48.58578	697.592	-0.375	0.6543	-0.018066	2.174	-21.352	1538.1859	-1.8841	1.0801	-0.035742	33.217	239.598	563.0523	-0.53271	0.30029	-0.043945	NaN	NaN	NaN	NaN	NaN	NaN
2.72	-17.649	-42.774	663.787	-0.35693	0.64502	-0.024902	-46.2054	57.167	1520.7856	-1.8984	1.0664	-0.025391	24.144	222.5493	527.418	-0.48145	0.2832	-0.03125	NaN	NaN	NaN	NaN	NaN	NaN
2.722	-11.468	-32.9688	639.34788	-0.35107	0.63721	-0.024902	-43.3865	14.297	1524.6002	-1.9121	1.0512	-0.01123	-1.766	225.905	476.338	-0.45313	0.27002	-0.018555	NaN	NaN	NaN	NaN	NaN	NaN
2.724	-12.879	-33.42866	617.6117	-0.33496	0.62354	-0.027832	-37.095	26.4169	1548.7403	-1.92	1.0436	0.00068359	-11.456	180.072	439.636	-0.40234	0.25195	0.0024414	NaN	NaN	NaN	NaN	NaN	NaN
2.726	2.161	-40.0334	612.048	-0.32348	0.61157	-0.033936	-67.1985	56.3257	1563.4016	-1.9158	1.0245	0.020215	-23.713	173.9847	402.259	-0.35278	0.24292	0.013916	NaN	NaN	NaN	NaN	NaN	NaN
2.728	5.057	-37.8393	594.59	-0.31396	0.59619	-0.032715	-43.5733	-21.682	1593.609	-1.897	1.0007	0.027149	-52.6766	133.223	347.5763	-0.30615	0.23438	0.027832	NaN	NaN	NaN	NaN	NaN	NaN
2.73	-6.1252	-27.5	585.678	-0.2959	0.58398	-0.039063	-40.8948	14.311	1601.013	-1.8706	0.97705	0.036133	-48.5055	159.25	334.477	-0.23486	0.22363	0.04248	NaN	NaN	NaN	NaN	NaN	NaN
2.732	3.362	-26.007	582.748	-0.29053	0.57666	-0.042969	-83.736	-15.902	1583.404	-1.8473	0.95508	0.04375	-52.982	145.7702	293.87	-0.19482	0.22363	0.046387	NaN	NaN	NaN	NaN	NaN	NaN
2.734	1.289	-12.612	567.575	-0.27148	0.55859	-0.049316	-39.6837	-48.697	1599.703	-1.8338	0.94306	0.043067	-25.883	166.886	269.443	-0.11328	0.21143	0.058594	NaN	NaN	NaN	NaN	NaN	NaN
2.736	11.055	-6.93	538.4553	-0.25293	0.54248	-0.04248	-56.7023	14.3493	1567.918	-1.8249	0.9169	0.062988	-25.279	130.616	226.24	-0.042481	0.19288	0.073242	NaN	NaN	NaN	NaN	NaN	NaN
2.738	-23.4197	3.4822	514.64108	-0.23975	0.53711	-0.058594	-54.8018	-32.689	1535.655	-1.8293	0.91406	0.08711	-26.851	131.419	196.443	0.019043	0.17578	0.083496	NaN	NaN	NaN	NaN	NaN	NaN
2.74	-6.771	2.7601	523.355	-0.22559	0.52051	-0.063477	-8.683	-5.9894	1515.578	-1.855	0.94482	0.095703	-53.374	108.151	166.439	0.10254	0.16553	0.087891	NaN	NaN	NaN	NaN	NaN	NaN
2.742	-15.38	-0.7751	508.695	-0.21094	0.50757	-0.0625	-40.7319	45.832	1480.3076	-1.8833	0.97998	0.074317	-39.795	117.978	196.2449	0.13379	0.14941	0.096191	NaN	NaN	NaN	NaN	NaN	NaN
2.744	-10.674	1.596	493.869	-0.19678	0.49609	-0.063477	-24.3469	12.285	1498.29	-1.8632	0.98291	0.060547	-46.954	113.58	172.394	0.19336	0.12158	0.1123	NaN	NaN	NaN	NaN	NaN	NaN
2.746	-28.0394	4.555	488.464	-0.18652	0.48242	-0.071289	19.866	98.796	1501.812	-1.8144	0.97158	0.069531	-35.268	116.175	193.878	0.22583	0.10596	0.11695	NaN	NaN	NaN	NaN	NaN	NaN
2.748	-24.0892	7.503	486.611	-0.1792	0.4751	-0.067871	24.0229	107.251	1491.861	-1.805	0.96787	0.075683	5.98999999999999	74.256	156.388	0.25684	0.080078	0.12939	NaN	NaN	NaN	NaN	NaN	NaN
2.75	-30.739	8.725	473.895	-0.1626	0.45947	-0.07373	48.6497	66.8077	1504.288	-1.8301	0.97852	0.082031	-13.703	53.2568	135.724	0.29297	0.062988	0.14404	NaN	NaN	NaN	NaN	NaN	NaN
2.752	-37.3856	13.746	439.2305	-0.156	0.4519	-0.070069	33.2376	120.728	1467.199	-1.8388	0.99749	0.089551	-5.442	33.4631	100.0157	0.30322	0.055664	0.14697	NaN	NaN	NaN	NaN	NaN	NaN
2.754	-36.2177	1.153	433.1139	-0.14795	0.44043	-0.07373	37.24108	64.3026	1445.034	-1.8253	1.0111	0.089746	5.293	35.9367	83.0638	0.30762	0.038086	0.15576	NaN	NaN	NaN	NaN	NaN	NaN
2.756	-44.146	-1.7027	436.752	-0.13525	0.43164	-0.073242	73.054	68.50616	1427.873	-1.7863	1.0157	0.086231	25.646	50.4104	68.3039	0.30762	0.03003	0.1665	NaN	NaN	NaN	NaN	NaN	NaN
2.758	-37.46	-5.51	427.01	-0.13477	0.42236	-0.074707	38.1698	108.054	1389.58	-1.736	1.0087	0.086719	30.311	50.9373	88.96	0.29688	0.016113	0.17578	NaN	NaN	NaN	NaN	NaN	NaN
2.76	-40.3529	1.968	412.566	-0.13037	0.41748	-0.075195	34.1608	27.417	1389.8913	-1.7007	0.98877	0.084473	62.638	51.006	59.444	0.27441	0.010742	0.18945	NaN	NaN	NaN	NaN	NaN	NaN
2.762	-40.2236	0.368000000000002	421.116	-0.12963	0.40503	-0.072265	29.948	64.341	1363.056	-1.6639	0.96582	0.089062	55.5601	43.109	75.489	0.26367	0.0087891	0.19873	NaN	NaN	NaN	NaN	NaN	NaN
2.764	-28.444	-3.96	407.013	-0.12549	0.39697	-0.069824	16.586	50.037	1337.678	-1.641	0.9502	0.088867	69.8513	44.2349	52.984	0.23584	0.0029297	0.21436	NaN	NaN	NaN	NaN	NaN	NaN
2.766	-37.2531	-8.5222	398.231	-0.11963	0.38721	-0.070801	33.114	24.43	1349.26	-1.6211	0.93808	0.086524	32.921	50.755	70.357	0.2041	-0.0039063	0.22168	NaN	NaN	NaN	NaN	NaN	NaN
2.768	-32.75684	1.229	383.382	-0.12109	0.38525	-0.066895	3.814	108.2274	1327.431	-1.5992	0.93086	0.086719	27.466	64.427	60.445	0.17188	-0.0048828	0.23047	NaN	NaN	NaN	NaN	NaN	NaN
2.77	-36.069	10.5754	364.269	-0.12012	0.37744	-0.063477	-0.631999999999998	71.39	1322.104	-1.5859	0.91992	0.087402	27.64	50.33682	61.048	0.13574	-0.01123	0.24072	NaN	NaN	NaN	NaN	NaN	NaN
2.772	-22.2329	4.6983	357.655	-0.11841	0.36938	-0.063965	25.876	110.3443	1318.169	-1.5597	0.90976	0.086426	50.411	53.391	18.7022	0.125	-0.01416	0.24902	NaN	NaN	NaN	NaN	NaN	NaN
2.774	-2.114	9.602	334.688	-0.12109	0.36279	-0.058105	-10.939	164.267	1255.3123	-1.5406	0.8958	0.082617	14.175	32.461	26.835	0.092285	-0.027344	0.25537	NaN	NaN	NaN	NaN	NaN	NaN
2.776	-6.625	9.1369	341.523	-0.12109	0.35352	-0.060547	2.309	123.7926	1234.7142	-1.5182	0.87588	0.078711	-9.911	22.0211	-5.4885	0.080078	-0.018066	0.25757	NaN	NaN	NaN	NaN	NaN	NaN
2.778	-11.636	8.747	332.173	-0.12061	0.35303	-0.058105	-21.276	195.81	1208.7318	-1.4959	0.86348	0.081153	-19.83	2.1847	32.031	0.064453	-0.023926	0.26563	NaN	NaN	NaN	NaN	NaN	NaN
2.78	1.339	12.858	335.165	-0.12598	0.34766	-0.057617	-40.906	199.296	1189.3085	-1.4707	0.8418	0.077148	-10.276	16.712	43.953	0.052734	-0.024902	0.2749	NaN	NaN	NaN	NaN	NaN	NaN
2.782	4.596	8.2571	340.778	-0.12524	0.34082	-0.054443	-9.859	169.96	1186.93	-1.4505	0.82412	0.079883	-26.223	-6.5806	56.762	0.052246	-0.024902	0.27783	NaN	NaN	NaN	NaN	NaN	NaN
2.784	-1.553	8.3004	339.954	-0.12256	0.33643	-0.050781	-45.088	210.826	1141.539	-1.4282	0.81172	0.080664	-13.879	7.771	60.024	0.038086	-0.02832	0.28564	NaN	NaN	NaN	NaN	NaN	NaN
2.786	17.442	3.5957	338.079	-0.12305	0.33057	-0.044922	-52.0858	145.3566	1122.50376	-1.4035	0.80039	0.08457	-28.291	-17.2041	40.515	0.029297	-0.026611	0.28711	NaN	NaN	NaN	NaN	NaN	NaN
2.788	7.205	11.0871	305.854	-0.12695	0.32227	-0.04834	-6.532	151.8772	1107.0574	-1.3838	0.78691	0.080176	-34.578	15.006	25.6846	0.025391	-0.027832	0.29102	NaN	NaN	NaN	NaN	NaN	NaN
2.79	15.162	14.7293	285.276	-0.12842	0.31641	-0.047852	-25.998	199.009	1076.633	-1.3662	0.77148	0.081055	-53.001	15.5381	35.5928	0.022949	-0.030762	0.29492	NaN	NaN	NaN	NaN	NaN	NaN
2.792	-8.564	7.466	293.968	-0.12964	0.31519	-0.04834	-14.296	155.408	1056.6336	-1.3425	0.75615	0.084375	-50.272	46.512	40.8508	0.022461	-0.036133	0.29492	NaN	NaN	NaN	NaN	NaN	NaN
2.794	-7.579	-7.3398	304.093	-0.13184	0.31152	-0.042969	-11.214	209.407	1017.2742	-1.3202	0.74189	0.082227	-62.341	24.0683	44.438	0.020508	-0.038086	0.29053	NaN	NaN	NaN	NaN	NaN	NaN
2.796	-3.212	-5.7849	313.585	-0.13428	0.30908	-0.041992	5.375	196.006	1022.786	-1.2964	0.72353	0.079883	-15.717	35.404	44.344	0.022705	-0.037597	0.28906	NaN	NaN	NaN	NaN	NaN	NaN
2.798	13.0564	4.8015	296.838	-0.13867	0.30176	-0.037598	45.721	163.875	1041.576	-1.2705	0.70469	0.080957	-16.119	2.9266	37.6865	0.026367	-0.038574	0.27881	NaN	NaN	NaN	NaN	NaN	NaN
2.8	1.202	5.5389	293.962	-0.1416	0.29639	-0.037598	42.645	224.308	1001.654	-1.2402	0.68945	0.078125	-31.734	30.52	32.685	0.027832	-0.035645	0.27051	NaN	NaN	NaN	NaN	NaN	NaN
2.802	-22.941	4.7117	292.77	-0.14038	0.29004	-0.039551	49.0363	176.049	973.541	-1.2095	0.66982	0.072949	-35.249	4.672	32.1436	0.03125	-0.035156	0.26514	NaN	NaN	NaN	NaN	NaN	NaN
2.804	-18.437	11.8122	288.869	-0.13818	0.28564	-0.038086	66.5701	200.371	927.687	-1.178	0.65009	0.069141	-16.96	27.127	7.2904	0.037598	-0.035156	0.24707	NaN	NaN	NaN	NaN	NaN	NaN
2.806	-29.327	19.91672	273.978	-0.14111	0.28125	-0.040527	61.063	231.493	893.227	-1.1464	0.63173	0.071094	14.624	4.8051	18.1406	0.03833	-0.025878	0.24463	NaN	NaN	NaN	NaN	NaN	NaN
2.808	-18.392	13.594	271.817	-0.14258	0.2793	-0.036133	75.9139	171.1598	866.438	-1.1134	0.61397	0.066797	27.929	35.628	22.2611	0.038574	-0.019043	0.23486	NaN	NaN	NaN	NaN	NaN	NaN
2.81	-27.5896	2.5284	276.785	-0.13965	0.27637	-0.032715	74.0287	221.198	810.386	-1.0762	0.5957	0.065918	37.889	15.946	35.51	0.033691	-0.0097656	0.22852	NaN	NaN	NaN	NaN	NaN	NaN
2.812	-20.7391	-0.873699999999999	270.305	-0.13989	0.26709	-0.03125	55.8277	194.9399	771.083	-1.0381	0.57285	0.06289	32.482	31.8943	34.429	0.03418	-0.0029297	0.22119	NaN	NaN	NaN	NaN	NaN	NaN
2.814	-31.907	11.0899	278.426	-0.146	0.26514	-0.034668	73.1609	164.526	769.874	-0.99833	0.55752	0.058594	35.674	6.869763	42.83	0.039551	0.012695	0.21924	NaN	NaN	NaN	NaN	NaN	NaN
2.816	-30.249	13.2604	285.2137	-0.14648	0.26367	-0.034668	36.048	211.459	730.013	-0.96201	0.5376	0.051563	29.232	27.4224	55.256	0.03711	0.024658	0.2107	NaN	NaN	NaN	NaN	NaN	NaN
2.818	-23.118	16.1524	276.3848	-0.15137	0.26074	-0.032715	40.654	179.152	708.206	-0.92256	0.51885	0.051074	29.846	-0.7385	58.875	0.040039	0.038574	0.20801	NaN	NaN	NaN	NaN	NaN	NaN
2.82	-32.8552	18.2805	276.5913	-0.15674	0.25928	-0.031738	62.2496	197.762	682.155	-0.88379	0.49414	0.048828	38.274	29.2493	54.409	0.043945	0.04834	0.19531	NaN	NaN	NaN	NaN	NaN	NaN
2.822	-14.384	7.00909	287.532	-0.16773	0.2583	-0.036621	24.095	206.4	637.99	-0.84922	0.4791	0.04043	59.533	2.5203	23.66854	0.052002	0.061768	0.19335	NaN	NaN	NaN	NaN	NaN	NaN
2.824	-22.0111	7.9592	285.869	-0.1748	0.26025	-0.036133	25.269	145.2972	622.323	-0.81641	0.45586	0.04082	42.538	20.3527	23.103	0.063477	0.077148	0.18994	NaN	NaN	NaN	NaN	NaN	NaN
2.826	-12.119	22.969	295.122	-0.18262	0.26367	-0.040039	1.749	185.395	578.8889	-0.77969	0.44179	0.035351	3.539	15.7864	13.0473	0.072754	0.094727	0.17139	NaN	NaN	NaN	NaN	NaN	NaN
2.828	-6.114	32.218	294.569	-0.18896	0.26611	-0.036133	-18.777	170.85	548.4972	-0.73896	0.421	0.025782	-6.981	50.674	25.0983	0.078613	0.10449	0.17139	NaN	NaN	NaN	NaN	NaN	NaN
2.83	-13.355	35.542	298.705	-0.2002	0.27197	-0.033203	0.0409999999999968	153.8672	536.05	-0.69189	0.40283	0.023926	7.242	33.751	5.5922	0.083984	0.12598	0.16406	NaN	NaN	NaN	NaN	NaN	NaN
2.832	2.215	24.6059	310.3303	-0.21509	0.27271	-0.038086	-34.368	173.02	499.758	-0.65489	0.3793	0.018457	15.455	40.278	35.5835	0.099119	0.14111	0.1582	NaN	NaN	NaN	NaN	NaN	NaN
2.834	-18.3334	34.0543	309.98193	-0.22266	0.28174	-0.041016	-47.649	114.0211	487.599	-0.61387	0.36553	0.0081055	-9.286	26.16	38.0814	0.10547	0.15137	0.15234	NaN	NaN	NaN	NaN	NaN	NaN
2.836	18.685	39.521	331.369	-0.23779	0.2876	-0.041504	-34.375	122.0952	445.506	-0.57871	0.34522	0.006543	-26.183	32.151	50.469	0.11768	0.17285	0.1499	NaN	NaN	NaN	NaN	NaN	NaN
2.838	-5.882	31.6917	341.064	-0.24658	0.29736	-0.04248	-57.064	135.635	409.833	-0.5498	0.32656	0.0051758	-38.716	21.1445	52.038	0.12207	0.18115	0.14453	NaN	NaN	NaN	NaN	NaN	NaN
2.84	2.095	32.3549	345.229	-0.25928	0.30127	-0.041992	-26.9831	85.9879	407.198	-0.52539	0.31348	0.0014648	-52.691	26.7009	34.906	0.12451	0.20166	0.14063	NaN	NaN	NaN	NaN	NaN	NaN
2.842	6.326	48.221	337.463	-0.26929	0.3086	-0.046631	-44.3475	123.4724	364.481	-0.49668	0.29082	-0.0023437	-37.065	28.67851	34.2454	0.12451	0.21338	0.14038	NaN	NaN	NaN	NaN	NaN	NaN
2.844	10.384	55.301	333.5575	-0.27783	0.31396	-0.047852	-51.9097	98.0288	313.1549	-0.47344	0.27988	-0.003418	-48.047	33.4716	55.58	0.12158	0.22559	0.14307	NaN	NaN	NaN	NaN	NaN	NaN
2.846	-17.063	55.614	357.4841	-0.28906	0.32031	-0.054688	-14.442	88.765	288.6626	-0.44727	0.26699	-0.0049804	-12.917	20.7569	15.4457	0.10986	0.24268	0.13965	NaN	NaN	NaN	NaN	NaN	NaN
2.848	-8.702	54.396	379.171	-0.29102	0.33057	-0.054199	-45.121	126.918	261.9443	-0.41963	0.24863	-0.0085935	-36.315	0.84	36.3218	0.10449	0.25244	0.14258	NaN	NaN	NaN	NaN	NaN	NaN
2.85	5.234	53.4565	403.562	-0.29443	0.33936	-0.053223	-5.698	80.8301	276.025	-0.38281	0.23975	-0.0087891	-24.779	-3.665	29.494	0.083008	0.26807	0.14453	NaN	NaN	NaN	NaN	NaN	NaN
2.852	-23.18922	59.755	412.8795	-0.2998	0.34986	-0.056397	17.915	99.629	267.514	-0.33613	0.225	-0.015527	-59.2832	-14.4184	56.655	0.065186	0.27564	0.14453	NaN	NaN	NaN	NaN	NaN	NaN
2.854	-22.5507	47.6359	434.023	-0.30615	0.35986	-0.061035	-7.211	118.021	217.38	-0.28174	0.20996	-0.016113	-22.714	-0.672000000000001	47.229	0.050293	0.27979	0.1543	NaN	NaN	NaN	NaN	NaN	NaN
2.856	-12.177	47.124	437.54	-0.31689	0.37158	-0.063965	40.8326	79.2927	213.432	-0.2251	0.1998	-0.015723	2.871	-3.4086	41.234	0.03418	0.28906	0.15137	NaN	NaN	NaN	NaN	NaN	NaN
2.858	-8.409	51.179	439.124	-0.32373	0.37744	-0.0625	36.711	106.23	186.206	-0.16396	0.1876	-0.021386	20.292	25.895	19.9081	0.027832	0.29883	0.15576	NaN	NaN	NaN	NaN	NaN	NaN
2.86	-32.901	54.478	449.5378	-0.33643	0.396	-0.061523	18.625	78.874	163.6824	-0.10596	0.17676	-0.025879	12.222	23.3633	46.112	0.015137	0.30713	0.15527	NaN	NaN	NaN	NaN	NaN	NaN
2.862	-29.4483	59.784	463.4216	-0.35449	0.40552	-0.062256	57.289	53.779	152.757	-0.047754	0.16533	-0.022754	5.166	47.8808	42.888	0.0043945	0.32178	0.15503	NaN	NaN	NaN	NaN	NaN	NaN
2.864	-23.439	56.013	488.798	-0.37061	0.4165	-0.062988	34.206	84.314	120.58	0.0010741	0.15215	-0.030273	10.729	24.2342	70.1099	-0.0058594	0.33789	0.16064	NaN	NaN	NaN	NaN	NaN	NaN
2.866	-32.32297	57.429	509.7	-0.39063	0.43652	-0.0625	54.5279	33.7321	137.5923	0.047168	0.13028	-0.033398	49.544	10.368	71.8019	-0.037109	0.35498	0.16748	NaN	NaN	NaN	NaN	NaN	NaN
2.868	-33.1067	59.673	526.489	-0.40283	0.44629	-0.061523	53.9464	42.2079	145.545	0.087988	0.10927	-0.039843	23.363	-47.8647	99.04	-0.061523	0.3667	0.16748	NaN	NaN	NaN	NaN	NaN	NaN
2.87	-47.9149	58.117	545.795	-0.42822	0.46436	-0.059082	31.9804	59.943	123.463	0.12207	0.089355	-0.04834	53.0987	-40.777	117.354	-0.11865	0.38086	0.18311	NaN	NaN	NaN	NaN	NaN	NaN
2.872	-25.5471	72.41	550.086	-0.44238	0.48267	-0.060546	50.18054	28.9889	118.428	0.15605	0.072852	-0.055957	18.137	-77.54605	139.789	-0.1709	0.39428	0.19018	NaN	NaN	NaN	NaN	NaN	NaN
2.874	-21.133	76.612	558.233	-0.46484	0.49316	-0.060547	37.441	70.024	109.986	0.17647	0.049024	-0.065235	26.641	-29.605	157.4582	-0.23242	0.40186	0.19873	NaN	NaN	NaN	NaN	NaN	NaN
2.876	-30.4524	78.299	581.31	-0.49219	0.51367	-0.055176	10.463	56.438	93.78	0.19522	0.039258	-0.071484	-23.834	-53.7801	219.1463	-0.32227	0.41992	0.21924	NaN	NaN	NaN	NaN	NaN	NaN
2.878	-24.63	67.9181	601.354	-0.51196	0.52319	-0.049316	3.509	37.698	109.4079	0.21631	0.027636	-0.082226	-8.998	-10.451	283.691	-0.37109	0.4375	0.22559	NaN	NaN	NaN	NaN	NaN	NaN
2.88	-24.6047	78.555	613.822	-0.53027	0.53809	-0.049805	-13.75	78.386	73.6175	0.229	0.01416	-0.09375	-28.69675	-33.7152	385.9303	-0.479	0.45898	0.2334	NaN	NaN	NaN	NaN	NaN	NaN
2.882	11.306	79.855	629.22	-0.5625	0.55664	-0.04541	8.434	39.152	83.2495	0.23721	0.0037109	-0.10098	18.849	22.8822	479.6144	-0.58154	0.47364	0.2395	NaN	NaN	NaN	NaN	NaN	NaN
2.884	-21.8072	81.085	650.103	-0.5752	0.56641	-0.042969	5.031	49.614	93.035	0.24297	-0.00087892	-0.10713	-4.202	13.462	624.544	-0.69775	0.48975	0.25	NaN	NaN	NaN	NaN	NaN	NaN
2.886	-6.109	74.903	677.724	-0.604	0.58252	-0.029785	-40.83	50.791	79.365	0.24532	-0.0020508	-0.11025	1.31	72.452	790.32	-0.88037	0.50537	0.24609	NaN	NaN	NaN	NaN	NaN	NaN
2.888	-2.211	84.56	672.303	-0.62427	0.59717	-0.035645	-20.463	23.9468	75.093	0.23867	-0.0067383	-0.12129	-5.483	45.367	931.058	-0.99023	0.51563	0.24561	NaN	NaN	NaN	NaN	NaN	NaN
2.89	5.509	79.474	679.183	-0.6499	0.61572	-0.029785	-43.773	59.849	57.419	0.23096	-0.013672	-0.12793	36.465	84.199	1049.0641	-1.2046	0.53955	0.22559	NaN	NaN	NaN	NaN	NaN	NaN
2.892	-23.532	82.79	702.405	-0.68359	0.63477	-0.026367	-43.953	36.1824	44.614	0.21621	-0.014355	-0.12529	34.11	24.5794	1148.651	-1.3728	0.56763	0.20483	NaN	NaN	NaN	NaN	NaN	NaN
2.894	-2.962	80.9319	715.158	-0.69531	0.64453	-0.024414	-0.993000000000002	12.7677	47.324	0.20059	-0.009668	-0.13056	44.543	20.959	1215.19	-1.5449	0.59326	0.17432	NaN	NaN	NaN	NaN	NaN	NaN
2.896	-4.553	85.3996	733.645	-0.7207	0.66504	-0.018066	-65.8846	43.678	26.96675	0.19004	-0.0053711	-0.13213	32.338	-41.724	1276.168	-1.7383	0.63672	0.14404	NaN	NaN	NaN	NaN	NaN	NaN
2.898	-6.4856	94.233	735.416	-0.74707	0.68531	-0.01587	-30.212	18.8963	35.7854	0.16484	-0.0072266	-0.12754	3.255	-52.209	1299.785	-1.8257	0.66553	0.12744	NaN	NaN	NaN	NaN	NaN	NaN
2.9	-6.232	91.4175	764.072	-0.76514	0.70166	-0.015625	-0.555	34.874	52.532	0.13672	-0.0019531	-0.12305	21.2	-162.223	1248.31	-1.9688	0.73438	0.069824	NaN	NaN	NaN	NaN	NaN	NaN
2.902	-8.866	92.3875	786.151	-0.79053	0.7251	-0.01709	-39.1179	38.0594	57.079	0.10713	0.0061523	-0.11807	35.073	-207.3145	1240.939	-2.0002	0.79419	0.029785	NaN	NaN	NaN	NaN	NaN	NaN
2.904	-10.434	87.699	793.189	-0.79492	0.73633	-0.012207	12.423	-16.3417	71.78	0.074512	0.013379	-0.10898	68.409	-286.553	1203.184	-1.9819	0.84619	0	NaN	NaN	NaN	NaN	NaN	NaN
2.906	-24.0993	89.723	791.22	-0.80957	0.75977	-0.010254	0.75	24.6042	60.5843	0.041309	0.020019	-0.10234	98.91	-236.337	1172.26	-1.8828	0.93555	-0.050781	NaN	NaN	NaN	NaN	NaN	NaN
2.908	-22.9217	99.809	787.887	-0.81396	0.77393	-0.01001	9.936	4.714	45.4943	0.005371	0.027148	-0.096484	128.252	-214.085	1136.885	-1.7886	0.97314	-0.051758	NaN	NaN	NaN	NaN	NaN	NaN
2.91	-27.8981	104.725	792.226	-0.81738	0.79004	-0.010742	65.8461	1.5469	40.9425	-0.032715	0.033691	-0.09082	122.771	-121.549	1075.448	-1.5737	1.022	-0.05957	NaN	NaN	NaN	NaN	NaN	NaN
2.912	-27.4643	110.427	805.877	-0.81836	0.8125	-0.0039063	20.787	35.191	16.9895	-0.06582	0.037793	-0.078027	107.895	-104.437	1034.5973	-1.4087	1.0069	-0.074952	NaN	NaN	NaN	NaN	NaN	NaN
2.914	-39.65686	108.534	826.011	-0.81641	0.82227	-0.0068359	29.182	-3.606	17.802	-0.097168	0.038086	-0.077637	116.373	-47.2748	1026.9395	-1.2393	0.95703	-0.073242	NaN	NaN	NaN	NaN	NaN	NaN
2.916	-37.34615	100.27549	842.763	-0.81006	0.83838	-0.0063477	57.078	10.579	40.433	-0.12451	0.045898	-0.070215	125.724	-68.481	1040.08	-1.0547	0.90039	-0.070313	NaN	NaN	NaN	NaN	NaN	NaN
2.918	-39.1535	104.96391	854.335	-0.80127	0.85205	-0.0048828	35.914	15.4742	27.49	-0.14737	0.047461	-0.067969	111.9097	-32.219	1089.231	-0.98828	0.86914	-0.0625	NaN	NaN	NaN	NaN	NaN	NaN
2.92	-49.1496	117.174	856.248	-0.7876	0.86963	-0.0058594	44.8225	-27.934	63.182	-0.16748	0.052246	-0.064941	124.546	-63.872	1098.995	-0.87549	0.88916	-0.065918	NaN	NaN	NaN	NaN	NaN	NaN
2.922	-53.4262	123.703	878.387	-0.77295	0.8833	-0.0087891	42.677	15.1315	58.5977	-0.1789	0.056153	-0.064063	72.5067	-73.468	1094.978	-0.8374	0.93457	-0.075683	NaN	NaN	NaN	NaN	NaN	NaN
2.924	-28.389	123.1751	865.391	-0.76758	0.89063	-0.010254	28.508	-1.5	30.3311	-0.19141	0.0667	-0.064161	87.773	-102.542	1072.1739	-0.81592	0.98877	-0.071777	NaN	NaN	NaN	NaN	NaN	NaN
2.926	-35.4949	127.856	854.901	-0.75977	0.90918	-0.018555	53.3034	13.1279	29.968	-0.19297	0.072949	-0.067676	34.1606	-164.668	1091.207	-0.81006	1.0396	-0.057617	NaN	NaN	NaN	NaN	NaN	NaN
2.928	-24.448	132.45	851.6694	-0.75732	0.92627	-0.016846	36.084	46.922	8.74781	-0.18857	0.077832	-0.071094	14.886	-227.561	1111.933	-0.8252	1.043	-0.043945	NaN	NaN	NaN	NaN	NaN	NaN
2.93	-47.8274	131.491	879.556	-0.76123	0.94189	-0.018555	18.342	4.311	16.983	-0.17773	0.08252	-0.080078	-35.64	-305.976	1180.2357	-0.88867	1.0332	-0.0087891	NaN	NaN	NaN	NaN	NaN	NaN
2.932	-19.41	132.7167	895.642	-0.77148	0.96387	-0.019531	13.648	10.727	25.2925	-0.1584	0.086719	-0.086231	-37.5442	-327.242	1215.616	-0.97802	1.019	0.013916	NaN	NaN	NaN	NaN	NaN	NaN
2.934	-29.10723	136.8031	900.757	-0.78125	0.97852	-0.021973	6.18	22.5585	27.464	-0.12949	0.092969	-0.094336	-94.985	-371.015	1289.918	-1.0674	1.0332	0.075195	NaN	NaN	NaN	NaN	NaN	NaN
2.936	-22.3891	139.0206	898.6798	-0.79883	1.001	-0.022949	15.756	-15.854	45.012	-0.096289	0.091797	-0.10566	-109.801	-359.488	1330.539	-1.3398	0.87988	-0.02002	NaN	NaN	NaN	NaN	NaN	NaN
2.938	-26.9491	146.791	905.021	-0.8186	1.0173	-0.017334	-24.517	19.6481	50.082	-0.068945	0.094629	-0.11699	-137.824	-354.903	1381.752	-1.4102	0.86914	-0.10791	NaN	NaN	NaN	NaN	NaN	NaN
2.94	-5.755	159.812	902.275	-0.83984	1.0371	-0.018555	-30.41	-0.361000000000001	45.1306	-0.035645	0.097168	-0.12646	-107.701	-269.022	1422.95	-1.4019	0.93408	0.050781	NaN	NaN	NaN	NaN	NaN	NaN
2.942	-14.029	165.071	896.447	-0.87061	1.0669	-0.015137	-7.17899999999999	1.7562	28.2199	-0.0044921	0.095605	-0.13057	-121.638	-228.54488	1469.312	-1.5085	0.94653	0.051025	NaN	NaN	NaN	NaN	NaN	NaN
2.944	-7.907	161.476	898.056	-0.88281	1.0723	-0.016602	-29.675	43.5063	-2.8561	0.024707	0.094336	-0.14355	-105.421	-127.273	1481.448	-1.6421	0.979	0.03125	NaN	NaN	NaN	NaN	NaN	NaN
2.946	-0.824999999999999	155.1982	916.038	-0.91211	1.0957	-0.020508	-26.287	17.219	20.257	0.053222	0.093945	-0.15019	-104.559	-121.734	1528.915	-1.7925	0.97119	0.046387	NaN	NaN	NaN	NaN	NaN	NaN
2.948	3.2	158.3932	922.324	-0.93945	1.1167	-0.018555	-31.49	28.8503	42.2105	0.081641	0.096875	-0.15537	-50.4686	-53.89	1522.673	-1.8589	0.9585	0.0625	NaN	NaN	NaN	NaN	NaN	NaN
2.95	-8.133	155.2919	925.4004	-0.95703	1.1338	-0.018066	-47.9355	46.074	23.0566	0.10742	0.10107	-0.16309	-72.9012	-83.895	1533.996	-1.9922	0.96875	0.061523	NaN	NaN	NaN	NaN	NaN	NaN
2.952	-19.67232	154.199	935.50167	-0.97266	1.1592	-0.024414	-3.701	3.5277	31.306	0.12471	0.10899	-0.16905	-34.97	-34.946	1493.609	-2.0826	0.96533	0.052247	NaN	NaN	NaN	NaN	NaN	NaN
2.954	-18.235	145.5945	947.601	-0.97412	1.1665	-0.027832	-11.642	30.8712	45.863	0.14834	0.11719	-0.17656	-49.893	-96.559	1505.6538	-2.1519	0.96338	0.058594	NaN	NaN	NaN	NaN	NaN	NaN
2.956	-9.937	151.725	940.422	-0.98584	1.1851	-0.03418	-32.8811	6.442	53.317	0.16201	0.12617	-0.18243	-45.912	-64.004	1545.4725	-2.2285	0.95703	0.03418	NaN	NaN	NaN	NaN	NaN	NaN
2.958	-17.0413	158.49	943.4676	-0.99219	1.1992	-0.038575	20.413	-12.12	74.425	0.17744	0.13408	-0.18789	-49.4399	-136.98	1595.262	-2.2495	0.96533	0.038086	NaN	NaN	NaN	NaN	NaN	NaN
2.96	-27.9973	179.103	985.141	-1.002	1.209	-0.046387	-3.666	20.912	39.8101	0.18848	0.14307	-0.19775	-11.218	-109.6453	1628.558	-2.2793	0.96094	0.024902	NaN	NaN	NaN	NaN	NaN	NaN
2.962	-21.3911	201.363	1005.016	-1.0249	1.2212	-0.049805	7.392	-16.242	48.211	0.19844	0.1499	-0.19785	22.459	-195.11	1704.525	-2.3101	0.94385	0.021973	NaN	NaN	NaN	NaN	NaN	NaN
2.964	-30.2607	214.965	1032.2814	-1.042	1.2344	-0.051758	22.676	0.128	97.5903	0.20127	0.15977	-0.20049	51.899	-149.7437	1704.51	-2.3164	0.94238	0.036621	NaN	NaN	NaN	NaN	NaN	NaN
2.966	-60.035	233.6749	1056.3349	-1.0874	1.2563	-0.052246	14.146	9.967	112.330243	0.19971	0.1707	-0.20908	55.742	-197.628	1703.801	-2.314	0.95361	0.038086	NaN	NaN	NaN	NaN	NaN	NaN
2.968	-67.057	255.4918	1095.6222	-1.1303	1.2695	-0.057861	77.545	-12.519	161.369	0.19815	0.18369	-0.21485	93.4512	-104.7936	1688.555	-2.3113	0.96411	0.044189	NaN	NaN	NaN	NaN	NaN	NaN
2.97	-76.004	275.021	1137.14	-1.1689	1.2793	-0.056641	84.612	23.297	216.739	0.18701	0.19629	-0.21826	130.054	-138.501	1721.972	-2.3062	0.97705	0.054199	NaN	NaN	NaN	NaN	NaN	NaN
2.972	-71.283	300.354	1149.586	-1.2246	1.3047	-0.061035	45.133	15.4539	265.474	0.16387	0.21299	-0.2248	105.2573	-65.918	1735.031	-2.2871	0.98242	0.061523	NaN	NaN	NaN	NaN	NaN	NaN
2.974	-81.977	317.037	1167.035	-1.2495	1.313	-0.058105	53.604	1.475	344.062	0.12607	0.22432	-0.22588	106.029	-112.593	1735.484	-2.2759	0.98291	0.077148	NaN	NaN	NaN	NaN	NaN	NaN
2.976	-83.678	308.621	1181.798	-1.3081	1.3325	-0.063965	18.722	62.371	378.711	0.076073	0.24697	-0.2251	82.9589	-60.3619	1694.726	-2.25	0.98535	0.10059	NaN	NaN	NaN	NaN	NaN	NaN
2.978	-79.427	295.527	1175.669	-1.3533	1.3469	-0.061767	19.1481	70.074	436.3521	0.011621	0.26074	-0.22393	69.0733	-71.7138	1700.791	-2.2234	0.97828	0.10059	NaN	NaN	NaN	NaN	NaN	NaN
2.98	-93.683	289.635	1173.3727	-1.3887	1.3584	-0.062012	19.463	115.874	524.0753	-0.058594	0.27734	-0.22656	30.403	9.541	1667.785	-2.187	0.97217	0.11523	NaN	NaN	NaN	NaN	NaN	NaN
2.982	-81.998	266.379	1192.717	-1.4365	1.3652	-0.058105	-25.7978	146.98	603.757	-0.13642	0.30283	-0.22568	56.78	-3.9877	1628.8592	-2.123	0.99609	0.13477	NaN	NaN	NaN	NaN	NaN	NaN
2.984	-77.676	248.926	1193.564	-1.4473	1.3672	-0.056641	-26.3806	111.965	717.898	-0.21533	0.33037	-0.23125	24.221	50.212	1595.74	-2.0933	1.0024	0.12402	NaN	NaN	NaN	NaN	NaN	NaN
2.986	-67.376	223.19	1183.484	-1.4546	1.3696	-0.064941	-25.5732	131.33	824.4	-0.30049	0.35342	-0.22226	9.97	5.1077	1566.832	-2.061	0.97314	0.099609	NaN	NaN	NaN	NaN	NaN	NaN
2.988	-76.143	200.946	1161.351	-1.4371	1.3604	-0.066406	-45.211	93.545	905.017	-0.40108	0.38311	-0.21855	-42.41	22.2302	1578.214	-2.021	0.92675	0.094483	NaN	NaN	NaN	NaN	NaN	NaN
2.99	-80.716	168.991	1143.636	-1.4014	1.3496	-0.068848	-12.106	28.0694	992.846	-0.5083	0.40967	-0.21387	-19.638	-17.783	1593.49	-1.9976	0.89697	0.095215	NaN	NaN	NaN	NaN	NaN	NaN
2.992	-70.629	150.4168	1164.345	-1.3262	1.3125	-0.079102	-34.505	21.209	1016.543	-0.62656	0.44375	-0.20176	-57.4173	11.263	1633.743	-1.9824	0.90039	0.097656	NaN	NaN	NaN	NaN	NaN	NaN
2.994	-58.211	153.421	1151.887	-1.2808	1.2954	-0.087402	1.11199999999999	-66.9367	1022.913	-0.76661	0.4832	-0.18652	-39.611	1.425	1640.99	-1.9722	0.90283	0.095703	NaN	NaN	NaN	NaN	NaN	NaN
2.996	-60.436	146.968	1153.18	-1.1797	1.2539	-0.10254	11.404	-102.9847	1044.249	-0.91738	0.51953	-0.16113	-83.5142	30.745	1656.372	-1.9331	0.91846	0.10205	NaN	NaN	NaN	NaN	NaN	NaN
2.998	-57.862	138.1792	1152.096	-1.0955	1.2185	-0.10791	-32.721	-126.276	1021.931	-1.0831	0.55478	-0.13603	-91.67	11.987	1621.276	-1.9111	0.91211	0.10107	NaN	NaN	NaN	NaN	NaN	NaN
3	-63.361	138.2984	1166.686	-1.0288	1.1841	-0.12012	-15.715	-198.53	1054.396	-1.2686	0.5957	-0.10107	-106.685	18.0301	1625.67	-1.8921	0.90381	0.11133	NaN	NaN	NaN	NaN	NaN	NaN
3.002	-52.008	144.992	1151.873	-0.94971	1.144	-0.13477	-36.24	-166.92	1051.41	-1.4645	0.62656	-0.06211	-92.639	-8.4858	1598.805	-1.8706	0.89111	0.11084	NaN	NaN	NaN	NaN	NaN	NaN
3.004	-52.839	146.167	1145.313	-0.9209	1.1289	-0.1416	-67.968	-155.479	1031.652	-1.6609	0.66611	-0.015625	-96.103	4.359	1606.469	-1.8687	0.88818	0.10938	NaN	NaN	NaN	NaN	NaN	NaN
3.006	-67.829	150.127	1156.083	-0.87158	1.1021	-0.1582	-52.404	-152.662	1031.368	-1.8713	0.69307	0.027734	-65.2816	17.076	1576.242	-1.8589	0.87549	0.11816	NaN	NaN	NaN	NaN	NaN	NaN
3.008	-53.619	139.364	1132.795	-0.83984	1.0971	-0.16407	-68.351	-79.879	993.537	-2.0645	0.72256	0.067676	-73.02551	45.6207	1573.526	-1.8562	0.86841	0.125	NaN	NaN	NaN	NaN	NaN	NaN
3.01	-54.267	122.309	1122.288	-0.81689	1.085	-0.17969	-68.148	-72.457	985.062	-2.2324	0.75195	0.083496	-54.671	70.443	1528.783	-1.853	0.86572	0.12744	NaN	NaN	NaN	NaN	NaN	NaN
3.012	-59.466	106.3323	1109.22	-0.77148	1.0703	-0.18164	-71.368	-49.1397	1011.989	-2.3413	0.7835	0.055469	-28.46	84.949	1521.493	-1.8477	0.86328	0.13818	NaN	NaN	NaN	NaN	NaN	NaN
3.014	-62.023	94.8371	1131.038	-0.75586	1.0625	-0.19727	-100.204	2.378	984.2026	-2.353	0.83682	0.028027	-6.231	130.255	1479.835	-1.8477	0.85742	0.13623	NaN	NaN	NaN	NaN	NaN	NaN
3.016	-57.446	82.5737	1095.355	-0.71484	1.0508	-0.20215	-59.535	-34.606	1001.3221	-2.294	0.88487	0.012402	15.267	151.535	1495.489	-1.8398	0.83789	0.146	NaN	NaN	NaN	NaN	NaN	NaN
3.018	-35.917	92.365	1065.8805	-0.68408	1.0415	-0.21631	-15.933	-7.63800000000001	1006.0418	-2.166	0.91445	-0.0017578	51.229	205.999	1466.25	-1.8359	0.82813	0.14599	NaN	NaN	NaN	NaN	NaN	NaN
3.02	-58.0877	82.695	1039.275	-0.66992	1.0371	-0.22754	23.686	-30.848	978.79	-1.9878	0.90283	-0.025879	49.74	205.013	1441.297	-1.8242	0.81836	0.14893	NaN	NaN	NaN	NaN	NaN	NaN
3.022	-36.8431	67.067	1021.269	-0.64697	1.0239	-0.23779	51.2165	-109.103	1005.738	-1.7573	0.82549	-0.050293	71.081	231.587	1403.0309	-1.8086	0.80957	0.1499	NaN	NaN	NaN	NaN	NaN	NaN
3.024	-27.499	41.508	1011.368	-0.63282	1.0157	-0.23853	28.547	-125.057	1012.771	-1.5043	0.72148	-0.076953	77.3463	199.349	1385.0652	-1.7925	0.80225	0.15283	NaN	NaN	NaN	NaN	NaN	NaN
3.026	-17.5865	36.169	992.737	-0.61475	1.0093	-0.24756	33.232	-203.138	1049.669	-1.2828	0.62031	-0.10195	76.91	195.3099	1379.366	-1.7588	0.78711	0.1582	NaN	NaN	NaN	NaN	NaN	NaN
3.028	-14.507	3.4623	990.843	-0.58301	1.0039	-0.25244	53.933	-272.217	1134.882	-1.0944	0.54307	-0.14512	89.3752	153.603	1378.256	-1.7192	0.76758	0.16113	NaN	NaN	NaN	NaN	NaN	NaN
3.03	-8.332	-10.9715	981.837	-0.56592	1.0044	-0.25879	16.646	-250.9792	1140.9134	-0.96484	0.48926	-0.1792	91.0446	169.4822	1333.537	-1.6772	0.75439	0.16504	NaN	NaN	NaN	NaN	NaN	NaN
3.032	-11.69	-24.45615	953.97	-0.51953	0.99609	-0.27051	29.493	-305.682	1183.2284	-0.86797	0.4708	-0.20137	90.9021	136.185	1311.324	-1.6172	0.73242	0.1626	NaN	NaN	NaN	NaN	NaN	NaN
3.034	-5.434	-32.783	930.234	-0.48901	0.98706	-0.27612	28.799	-263.421	1229.288	-0.81396	0.47295	-0.20381	81.589	164.1021	1245.4604	-1.584	0.71582	0.16064	NaN	NaN	NaN	NaN	NaN	NaN
3.036	38.229	-61.2213	916.073	-0.4541	0.98633	-0.29102	-2.971	-205.741	1246.6652	-0.7999	0.54561	-0.1749	70.222	121.744	1213.967	-1.5195	0.68555	0.1543	NaN	NaN	NaN	NaN	NaN	NaN
3.038	23.45	-92.59217	917.888	-0.40967	0.97314	-0.31201	18.082	-208.63	1308.93	-0.8876	0.66904	-0.18379	46.92	184.7501	1162.04	-1.4761	0.65527	0.14942	NaN	NaN	NaN	NaN	NaN	NaN
3.04	26.771	-103.147	902.251	-0.38965	0.9668	-0.32617	18.344	-128.512	1335.815	-0.94727	0.76563	-0.21973	48.886	176.1486	1149.1405	-1.4355	0.62305	0.14258	NaN	NaN	NaN	NaN	NaN	NaN
3.042	40.536	-126.1866	898.559	-0.35889	0.96582	-0.34375	47.845	-136.113	1365.638	-0.91358	0.76963	-0.23067	32.699	249.163	1146.049	-1.3687	0.59521	0.13379	NaN	NaN	NaN	NaN	NaN	NaN
3.044	43.966	-144.79746	918.465	-0.34936	0.96118	-0.35694	78.498	-164.847	1399.898	-0.91026	0.72452	-0.21436	32.061	228.789	1123.638	-1.3335	0.57373	0.125	NaN	NaN	NaN	NaN	NaN	NaN
3.046	51.816	-152.596	919.534	-0.3457	0.96484	-0.3667	78.076	-98.607	1358.665	-0.98447	0.70264	-0.18701	-4.225	286.07	1075.691	-1.2598	0.53662	0.1167	NaN	NaN	NaN	NaN	NaN	NaN
3.048	41.15	-153.506	909.1749	-0.34863	0.97461	-0.38086	77.965	-118.85	1341.4132	-1.1213	0.71484	-0.16426	-15.643	251.412	1010.815	-1.2082	0.50879	0.11035	NaN	NaN	NaN	NaN	NaN	NaN
3.05	68.027	-140.7761	905.124825	-0.35791	0.9751	-0.39307	62.385	-63.323	1380.594	-1.2632	0.75049	-0.1499	-48.996	284.07	960.6811	-1.1519	0.48193	0.10596	NaN	NaN	NaN	NaN	NaN	NaN
3.052	37.363	-144.7159	922.3294	-0.38281	0.99219	-0.40234	23.219	-31.983	1381.946	-1.3808	0.79189	-0.1377	-69.113	233.4406	922.271	-1.0679	0.45557	0.10254	NaN	NaN	NaN	NaN	NaN	NaN
3.054	47.103	-143.3697	939.112	-0.4082	1.0083	-0.40527	18.875	-106.4523	1424.465	-1.4663	0.8206	-0.125	-63.289	272.594	864.0433	-1.0332	0.44043	0.096191	NaN	NaN	NaN	NaN	NaN	NaN
3.056	40.81	-156.7022	940.602	-0.44043	1.0254	-0.41211	8.144	-77.95	1474.301	-1.5366	0.85342	-0.12187	-51.45	231.9602	825.852	-0.95947	0.4165	0.07373	NaN	NaN	NaN	NaN	NaN	NaN
3.058	46.273	-163.222	950.936	-0.49854	1.0513	-0.41455	0.660999999999998	-122.253	1518.946	-1.5941	0.87246	-0.12578	-50.533	257.433	790.7639	-0.90552	0.39527	0.077393	NaN	NaN	NaN	NaN	NaN	NaN
3.06	49.74	-169.702	968.002	-0.52686	1.0659	-0.4126	0.627000000000002	-152.961	1593.853	-1.6523	0.88184	-0.12305	-50.829	196.706	748.28319	-0.85498	0.37061	0.074707	NaN	NaN	NaN	NaN	NaN	NaN
3.062	46.669	-163.3205	964.742	-0.60352	1.0879	-0.41992	-5.028	-89.214	1585.601	-1.7209	0.89551	-0.12881	-51.774	230.67	728.802	-0.79883	0.34766	0.068359	NaN	NaN	NaN	NaN	NaN	NaN
3.064	49.797	-161.7003	949.4435	-0.65552	1.1086	-0.41089	11.342	-144.708	1565.695	-1.7858	0.90166	-0.14307	-21.502	198.259	700.042	-0.76904	0.3335	0.066895	NaN	NaN	NaN	NaN	NaN	NaN
3.066	21.333	-158.8258	943.4794	-0.70801	1.125	-0.40967	37.684	-127.545	1596.791	-1.8346	0.91377	-0.15752	-4.76900000000001	235.821	706.794	-0.70947	0.32178	0.057129	NaN	NaN	NaN	NaN	NaN	NaN
3.068	45.546	-170.3847	954.6247	-0.76172	1.1484	-0.4082	44.398	-96.9153	1576.498	-1.8882	0.93057	-0.18398	4.011	199.992	648.433	-0.67529	0.29736	0.060791	NaN	NaN	NaN	NaN	NaN	NaN
3.07	42.73	-170.4088	952.54	-0.78662	1.1626	-0.40381	60.157	-147.034	1599.494	-1.9312	0.95166	-0.20654	4.266	217.625	619.153	-0.63574	0.28613	0.050781	NaN	NaN	NaN	NaN	NaN	NaN
3.072	36.601	-171.773	970.593	-0.81641	1.1738	-0.4082	74.647	-75.123	1615.887	-1.9497	0.97022	-0.2335	40.0407	174.9557	545.478	-0.58936	0.27051	0.049316	NaN	NaN	NaN	NaN	NaN	NaN
3.074	17.553	-175.974	996.757	-0.8291	1.1836	-0.40356	30.153	-77.408	1580.834	-1.9633	0.98203	-0.25645	22.215	195.5629	504.9135	-0.55957	0.25977	0.053711	NaN	NaN	NaN	NaN	NaN	NaN
3.076	33.378	-177.8224	1021.523	-0.84375	1.1914	-0.40283	6.509	-105.6435	1610.519	-1.9684	0.98789	-0.2791	19.402	169.439067	460.0589	-0.49561	0.24805	0.054688	NaN	NaN	NaN	NaN	NaN	NaN
3.078	22.055	-166.36513	1015.111	-0.85645	1.1895	-0.40527	22.157	-33.203	1575.622	-1.973	0.98994	-0.30264	39.984	195.633	425.297	-0.45922	0.23096	0.052246	NaN	NaN	NaN	NaN	NaN	NaN
3.08	27.222	-150.401	1007.1196	-0.87061	1.1821	-0.3999	22.312	-60.484	1558.1577	-1.9707	0.99219	-0.32373	62.644	168.3177	371.835	-0.41064	0.21631	0.056152	NaN	NaN	NaN	NaN	NaN	NaN
3.082	38.215	-150.8113	1020.613	-0.88477	1.1758	-0.39258	44.056	-14.7107	1568.3125	-1.9689	0.98418	-0.34434	70.94827	156.0501	342.427	-0.35742	0.2041	0.053223	NaN	NaN	NaN	NaN	NaN	NaN
3.084	50.155	-146.179	1023.889	-0.89502	1.1694	-0.39307	19.945	52.5838	1543.2632	-1.9714	0.97784	-0.36533	65.78328	109.952	296.1538	-0.31836	0.19141	0.049316	NaN	NaN	NaN	NaN	NaN	NaN
3.086	51.198	-149.842	1010.162	-0.90576	1.1606	-0.39404	-3.74	-0.286000000000001	1568.27744	-1.962	0.96143	-0.37276	36.898	121.3895	294.1	-0.26025	0.18164	0.046387	NaN	NaN	NaN	NaN	NaN	NaN
3.088	36.332	-153.02	1013.116	-0.91162	1.145	-0.38184	30.692	27.7214	1589.79	-1.9549	0.94278	-0.38604	64.8382	112.346	258.0966	-0.21485	0.16748	0.04834	NaN	NaN	NaN	NaN	NaN	NaN
3.09	36.526	-162.604	1027.207	-0.91406	1.1367	-0.38086	42.801	-9.762	1558.2915	-1.9551	0.92969	-0.39453	48.708	142.416	238.26	-0.16797	0.15381	0.051758	NaN	NaN	NaN	NaN	NaN	NaN
3.092	48.522	-171.4524	1045.018	-0.91016	1.123	-0.37891	63.31	-59.2215	1589.367	-1.9482	0.91728	-0.39893	33.946	147.039	215.4422	-0.1167	0.13672	0.037109	NaN	NaN	NaN	NaN	NaN	NaN
3.094	55.843	-158.8197	1017.0919	-0.90332	1.1025	-0.3772	98.4078	-3.499	1582.175	-1.9563	0.90742	-0.40859	-0.628	133.5589	199.042	-0.094727	0.12793	0.033203	NaN	NaN	NaN	NaN	NaN	NaN
3.096	53.404	-148.3291	1006.3779	-0.89258	1.083	-0.36963	61.708	-58.6477	1571.904	-1.9629	0.88906	-0.40469	-9.419	110.009	174.33051	-0.041992	0.10645	0.038574	NaN	NaN	NaN	NaN	NaN	NaN
3.098	46.443	-130.7589	1007.6989	-0.88623	1.0669	-0.37256	56.555	-58.1432	1560.9763	-1.9745	0.88096	-0.41201	-32.383	75.52448	173.036	-0.0014645	0.098144	0.03125	NaN	NaN	NaN	NaN	NaN	NaN
3.1	57.618	-116.139	1009.727	-0.8877	1.0547	-0.37158	56.491	-22.2752	1517.248	-1.9805	0.86719	-0.41064	-57.0684	62.028	153.572	0.03418	0.092285	0.022461	NaN	NaN	NaN	NaN	NaN	NaN
3.102	51.849	-116.703	1013.026	-0.89209	1.0396	-0.36963	34.9	-87.083	1530.7272	-1.9886	0.8501	-0.41318	-54.723	41.804	168.956	0.07666	0.066406	0.012695	NaN	NaN	NaN	NaN	NaN	NaN
3.104	61.247	-120.932	1025.022	-0.89502	1.0317	-0.36474	58.931	-5.757	1543.281	-2.0008	0.83946	-0.41289	-49.173	46.995	123.61	0.11597	0.061035	0.0075683	NaN	NaN	NaN	NaN	NaN	NaN
3.106	48.056	-124.3676	1040.525	-0.90137	1.0234	-0.35938	46.285	20.595	1502.325	-2.007	0.81992	-0.40313	-42.419	16.5297	123.969	0.14502	0.053711	-0.0058594	NaN	NaN	NaN	NaN	NaN	NaN
3.108	47.442	-115.3002	1018.297	-0.9126	1.0083	-0.35449	43.712	11.108	1489.086	-2.0109	0.81104	-0.4041	-38.713	34.7312	88.1487	0.18359	0.039551	-0.012695	NaN	NaN	NaN	NaN	NaN	NaN
3.11	50.723	-114.6223	981.104	-0.92041	1.0005	-0.34912	50.418	88.611	1469.745	-2.0151	0.80908	-0.40527	-59.7839	16.5497	87.3756	0.20068	0.036621	-0.022949	NaN	NaN	NaN	NaN	NaN	NaN
3.112	26.201	-104.388	963.6092	-0.91309	0.9917	-0.34082	29.427	41.734	1448.568	-2.0063	0.80879	-0.39648	-56.045	60.929	88.7554	0.22705	0.024414	-0.037598	NaN	NaN	NaN	NaN	NaN	NaN
3.114	53.955	-100.319	973.525	-0.90161	0.97388	-0.33691	57.286	54.333	1436.19975	-2.0059	0.8043	-0.40136	-59.264	39.964	93.039	0.24292	0.013184	-0.047607	NaN	NaN	NaN	NaN	NaN	NaN
3.116	21.779	-96.909	949.833	-0.88623	0.96533	-0.33447	52.226	118.745	1381.452	-1.9933	0.80273	-0.40996	-33.934	67.579	73.634	0.25781	0.0078125	-0.054688	NaN	NaN	NaN	NaN	NaN	NaN
3.118	52.508	-101.113	952.823	-0.86035	0.94727	-0.32715	41.959	68.371	1379.689	-1.97	0.78798	-0.40908	-23.338	15.0993	71.202	0.26416	-0.0039063	-0.066406	NaN	NaN	NaN	NaN	NaN	NaN
3.12	21.194	-109.2303	961.311	-0.84375	0.9375	-0.32227	54.985	140.901	1389.108	-1.9487	0.77588	-0.40332	-23.15	40.7163	59.97	0.27197	-0.0092773	-0.070313	NaN	NaN	NaN	NaN	NaN	NaN
3.122	35.925	-104.1106	969.345	-0.81104	0.92041	-0.31689	49.466	114.599	1370.496	-1.932	0.77148	-0.39902	-34.735	-2.7239	45.277	0.26514	-0.01709	-0.079102	NaN	NaN	NaN	NaN	NaN	NaN
3.124	18.018	-90.1837	943.323	-0.79102	0.90625	-0.31006	40.783	54.289084	1377.312	-1.9168	0.76992	-0.3998	-10.734	54.878	36.0851	0.26416	-0.025879	-0.08545	NaN	NaN	NaN	NaN	NaN	NaN
3.126	0.046999999999997	-80.8216	908.268	-0.77734	0.89063	-0.30371	42.6	100.955	1357.045	-1.8875	0.76172	-0.38887	20.399	41.777	34.139	0.25391	-0.029297	-0.089355	NaN	NaN	NaN	NaN	NaN	NaN
3.128	17.24	-64.454	894.0708	-0.75732	0.86963	-0.30029	15.25	36.989	1337.154	-1.8558	0.75791	-0.38399	34.074	78.296	32.8997	0.24658	-0.037598	-0.091797	NaN	NaN	NaN	NaN	NaN	NaN
3.13	6.128	-75.487	898.018	-0.74707	0.86719	-0.29688	29.179	69.999	1332.275	-1.8276	0.73682	-0.37256	58.469	10.483	30.734	0.2417	-0.038086	-0.097656	NaN	NaN	NaN	NaN	NaN	NaN
3.132	20.5	-72.978	873.403	-0.71631	0.84814	-0.28418	39.015	132.369	1277.534	-1.8002	0.71777	-0.36406	68.585	32.3785	-0.7725	0.2207	-0.039551	-0.094238	NaN	NaN	NaN	NaN	NaN	NaN
3.134	5.48099999999999	-81.104	866.006	-0.69849	0.84009	-0.27759	30.763	78.457	1273.1045	-1.768	0.69483	-0.35733	63.8072	-25.47873	37.9805	0.20923	-0.039795	-0.098144	NaN	NaN	NaN	NaN	NaN	NaN
3.136	26.08	-81.88	867.701	-0.67969	0.8252	-0.27148	41.082	136.989	1279.561	-1.7333	0.6749	-0.34209	57.0516	20.612	39.2923	0.18945	-0.043457	-0.09668	NaN	NaN	NaN	NaN	NaN	NaN
3.138	24.554	-78.6674	856.163	-0.65869	0.80664	-0.26855	35.896	131.211	1235.9587	-1.7036	0.6541	-0.3332	55.5878	-17.7183	58.025	0.16406	-0.044434	-0.089355	NaN	NaN	NaN	NaN	NaN	NaN
3.14	11.69	-68.06588	823.2335	-0.63818	0.79541	-0.26025	41.207	110.212	1244.754	-1.6675	0.63525	-0.31836	34.8355	40.51	38.246	0.15039	-0.049805	-0.09668	NaN	NaN	NaN	NaN	NaN	NaN
3.142	28.64	-56.1467	787.87329	-0.61475	0.78174	-0.25098	55.399	205.168	1216.964	-1.6324	0.61777	-0.30703	58.92353	7.769	37.657	0.11328	-0.049316	-0.092773	NaN	NaN	NaN	NaN	NaN	NaN
3.144	34.184	-49.6283	787.208	-0.59472	0.76855	-0.2456	41.795	169.906	1189.402	-1.6043	0.59707	-0.29863	43.707	57.83	24.124	0.093259	-0.048828	-0.092285	NaN	NaN	NaN	NaN	NaN	NaN
3.146	40.331	-47.85308	775.137	-0.57959	0.75244	-0.23682	44.883	186.843	1164.7	-1.5715	0.5752	-0.28692	4.145	24.4125	34.4059	0.072266	-0.051758	-0.087402	NaN	NaN	NaN	NaN	NaN	NaN
3.148	27.871	-49.062	757.33	-0.5459	0.73242	-0.22559	38.586	203.603	1092.312	-1.5301	0.55762	-0.27227	-20.622	64.053	37.4789	0.044922	-0.053223	-0.089844	NaN	NaN	NaN	NaN	NaN	NaN
3.15	32.195	-54.916	752.643	-0.53662	0.72705	-0.22021	15.816	135.404	1069.3986	-1.4839	0.53955	-0.26611	1.316	13.01749	44.94	0.033691	-0.051758	-0.091797	NaN	NaN	NaN	NaN	NaN	NaN
3.152	40.584	-53.3028	757.166	-0.51807	0.70703	-0.20996	21.845	188.66796	1050.2375	-1.4472	0.51718	-0.2539	-3.001	39.627	34.8341	0.01709	-0.047852	-0.090332	NaN	NaN	NaN	NaN	NaN	NaN
3.154	51.626	-39.017	727.991	-0.4917	0.69092	-0.1958	16.588	175.9975	1028.49	-1.4035	0.49451	-0.24119	-20.772	-16.7575	36.5071	0.0041504	-0.041504	-0.096924	NaN	NaN	NaN	NaN	NaN	NaN
3.156	45.297	-30.1416	687.4346	-0.48633	0.68457	-0.19092	20.24	152.78	1030.928	-1.3691	0.47342	-0.22752	-26.683	12.0559	47.2403	-0.0087891	-0.037109	-0.099121	NaN	NaN	NaN	NaN	NaN	NaN
3.158	45.758	-24.1806	663.82595	-0.4668	0.66406	-0.18018	34.644	208.352	995.37	-1.3244	0.46006	-0.21668	-41.391	-8.016	21.9849	-0.01416	-0.033691	-0.10107	NaN	NaN	NaN	NaN	NaN	NaN
3.16	69.799	-26.1464	655.5499	-0.44556	0.64893	-0.17236	20.426	126.117	975.587	-1.2827	0.44678	-0.20654	-62.455	50.2371	23.5491	-0.018066	-0.026855	-0.10352	NaN	NaN	NaN	NaN	NaN	NaN
3.162	49.765	-22.7064	644.398	-0.4292	0.63135	-0.16309	23.043	136.6154	949.471	-1.2483	0.4303	-0.19709	-58.9103	36.817	33.1728	-0.02832	-0.021484	-0.10645	NaN	NaN	NaN	NaN	NaN	NaN
3.164	48.97	-29.451	633.39	-0.40381	0.61328	-0.1499	22.264	175.157	889.011	-1.2054	0.4146	-0.18149	-75.7875	47.478	41.0645	-0.03125	-0.014405	-0.11011	NaN	NaN	NaN	NaN	NaN	NaN
3.166	39.645	-33.8768	625.478	-0.39453	0.60645	-0.14648	19.049	130.2068	878.9039	-1.171	0.39357	-0.17171	-30.359	11.7836	39.3993	-0.03418	-0.0083008	-0.10889	NaN	NaN	NaN	NaN	NaN	NaN
3.168	46.78	-17.826	628.384	-0.37451	0.58447	-0.13818	33.083	202.753	852.145	-1.1419	0.38966	-0.16086	-36.763	2.3085	52.311	-0.034668	0.0014648	-0.11475	NaN	NaN	NaN	NaN	NaN	NaN
3.17	31.165	-10.7898	599.28	-0.35791	0.56885	-0.12964	-4.774	171.7356	806.033	-1.104	0.38525	-0.1499	-41.542	-19.7466	43.277	-0.034668	0.0078125	-0.1167	NaN	NaN	NaN	NaN	NaN	NaN
3.172	41.563	-7.6107	561.9308	-0.3418	0.55566	-0.11914	-3.535	138.482	787.597	-1.0729	0.3717	-0.13724	-55.938	-3.855	64.074	-0.028809	0.023438	-0.12646	NaN	NaN	NaN	NaN	NaN	NaN
3.174	19.501	-5.2993	562.8439	-0.32178	0.5376	-0.1123	7.677	200.009	741.13	-1.0431	0.3661	-0.12393	-36.635	10.53	41.301	-0.015869	0.033691	-0.12891	NaN	NaN	NaN	NaN	NaN	NaN
3.176	31.022	-6.72476	542.708	-0.31152	0.52734	-0.10889	-15.481	148.716	707.8731	-1.0106	0.36251	-0.11247	-11.613	18.8295	34.191	-0.0014648	0.050293	-0.12891	NaN	NaN	NaN	NaN	NaN	NaN
3.178	32.645	-8.5204	535.185	-0.29297	0.5083	-0.099121	1.114	173.7758	690.364	-0.97375	0.35868	-0.10158	26.387	19.32335	14.2101	0.01416	0.056152	-0.14746	NaN	NaN	NaN	NaN	NaN	NaN
3.18	9.453	-6.226	526.963	-0.28199	0.49585	-0.091553	-11.658	199.606	629.048	-0.93896	0.35596	-0.094238	28.034	23.8086	19.2172	0.022949	0.060547	-0.14502	NaN	NaN	NaN	NaN	NaN	NaN
3.182	28.492	-11.101	520.123	-0.26758	0.48242	-0.086426	2.045	138.722	584.5542	-0.90591	0.34799	-0.081608	41.51	39.098	9.745	0.042969	0.076172	-0.14014	NaN	NaN	NaN	NaN	NaN	NaN
3.184	43.292	-9.7591	512.039	-0.25391	0.47314	-0.081055	33.107	186.883	544.2202	-0.86866	0.34791	-0.069934	24.188	27.911	30.1607	0.055176	0.091065	-0.13965	NaN	NaN	NaN	NaN	NaN	NaN
3.186	28.076	0.18	482.2208	-0.24414	0.46387	-0.071289	-1.848	161.873	518.345	-0.8353	0.34372	-0.059754	36.06	31.2	13.9351	0.068848	0.10303	-0.14307	NaN	NaN	NaN	NaN	NaN	NaN
3.188	17.216	7.8239	464.7614	-0.22607	0.44189	-0.068848	4.39	157.777	514.3853	-0.79233	0.33837	-0.049852	54.1287	7.73658	47.5913	0.083496	0.11621	-0.14014	NaN	NaN	NaN	NaN	NaN	NaN
3.19	31.879	15.9968	450.3143	-0.21167	0.43384	-0.062011	23.008	213.425	495.712	-0.75342	0.33252	-0.034668	65.1117	26.225	44.4483	0.092285	0.12061	-0.14111	NaN	NaN	NaN	NaN	NaN	NaN
3.192	35.768	12.8261	434.9911	-0.20264	0.42432	-0.060059	8.535	154.69	473.871	-0.71425	0.32772	-0.023382	66.633	4.4991	55.815	0.10254	0.12793	-0.14258	NaN	NaN	NaN	NaN	NaN	NaN
3.194	3.707	13.2322	421.755	-0.1875	0.40918	-0.052246	10.275	154.367	469.294	-0.66282	0.32373	-0.013491	36.193	41.639	21.9411	0.10523	0.1399	-0.14453	NaN	NaN	NaN	NaN	NaN	NaN
3.196	32.297	7.7546	423.614	-0.17529	0.40088	-0.052246	19.028	166.184	425.445	-0.61843	0.31808	0.0024923	41.075	29.004	34.0077	0.11328	0.14746	-0.14453	NaN	NaN	NaN	NaN	NaN	NaN
3.198	36.208	12.78345	423.147	-0.16064	0.38379	-0.048828	18.907	105.959	394.7199	-0.56991	0.31496	0.012603	9.615	66.395	15.954	0.11768	0.15186	-0.14697	NaN	NaN	NaN	NaN	NaN	NaN
3.2	48.244	21.7125	405.606	-0.14893	0.375	-0.045898	19.036	159.992	370.176	-0.52295	0.31201	0.024902	17.841	10.96402	18.4362	0.11768	0.15527	-0.15137	NaN	NaN	NaN	NaN	NaN	NaN
3.202	32.843	24.6533	390.5554	-0.13818	0.36572	-0.043457	-7.14400000000001	129.6576	327.4224	-0.47346	0.30369	0.035363	19.72	15.25622	23.8386	0.11621	0.1626	-0.146	NaN	NaN	NaN	NaN	NaN	NaN
3.204	38.581	23.047	378.4312	-0.12549	0.35059	-0.03418	-2.615	109.7002	325.29	-0.42446	0.30081	0.045976	13.663	-34.669	44.04355	0.10742	0.17041	-0.15625	NaN	NaN	NaN	NaN	NaN	NaN
3.206	45.925	26.762	374.5253	-0.11963	0.34619	-0.03418	48.237	139.411	295.859	-0.38004	0.29535	0.05289	-16.031	10.5137	51.7274	0.10059	0.17822	-0.15576	NaN	NaN	NaN	NaN	NaN	NaN
3.208	37.144	37.636	353.7007	-0.11621	0.34033	-0.03125	58.3904	85.529	277.081	-0.33166	0.28596	0.062524	-40.94	3.1286	55.265	0.075684	0.18262	-0.15918	NaN	NaN	NaN	NaN	NaN	NaN
3.21	52.604	29.1756	343.646	-0.11255	0.33447	-0.030517	34.287	96.203	276.383	-0.27734	0.28516	0.076172	-64.111	64.627	65.076	0.067871	0.18701	-0.15918	NaN	NaN	NaN	NaN	NaN	NaN
3.212	48.714	19.114	355.086	-0.10889	0.3252	-0.022949	6.145	115.848	229.413	-0.22399	0.27695	0.08312	-36.531	-5.2397	75.583	0.032715	0.19385	-0.16797	NaN	NaN	NaN	NaN	NaN	NaN
3.214	38.678	24.5101	350.486	-0.10254	0.31934	-0.024414	17.878	86.391	216.6881	-0.17207	0.26603	0.093176	-42.915	18.2313	76.503	-0.000488	0.19873	-0.16968	NaN	NaN	NaN	NaN	NaN	NaN
3.216	35.194	23.5112	337.011	-0.1001	0.31641	-0.019043	19.826	139.308	193.652	-0.11616	0.25686	0.098493	-52.3505	-35.2682	105.0796	-0.036621	0.20264	-0.1709	NaN	NaN	NaN	NaN	NaN	NaN
3.218	45.3	28.724	321.982	-0.096191	0.30957	-0.017578	25.706	100.286	161.9189	-0.062783	0.24226	0.1082	-45.134	7.381	129.189	-0.10547	0.20996	-0.17822	NaN	NaN	NaN	NaN	NaN	NaN
3.22	11.239	23.045	338.439	-0.093506	0.30737	-0.014648	1.264	87.722	180.076	-0.013672	0.22705	0.11914	-18.581	-17.193	182.881	-0.13281	0.2168	-0.17822	NaN	NaN	NaN	NaN	NaN	NaN
3.222	31.449	29.7525	331.7	-0.089844	0.30322	-0.013184	-4.758	118.627	161.285	0.037361	0.2138	0.12318	-39.143	33.7127	218.3079	-0.21777	0.22559	-0.17871	NaN	NaN	NaN	NaN	NaN	NaN
3.224	27.924	21.6839	304.2559	-0.089844	0.29736	-0.013184	-5.646	69.855	153.809	0.077779	0.20476	0.13163	5.186	-4.5714	283.6382	-0.28467	0.23974	-0.18579	NaN	NaN	NaN	NaN	NaN	NaN
3.226	8.282	31.7084	292.9064	-0.085449	0.29297	-0.011719	-5.649	77.441	163.869	0.11684	0.19498	0.14484	4.685	16.7757	346.425	-0.3584	0.25684	-0.1875	NaN	NaN	NaN	NaN	NaN	NaN
3.228	25.917	29.1426	306.221	-0.087891	0.2915	-0.010254	-8.22	59.545	132.17	0.15738	0.17868	0.15391	-10.446	-11.8154	426.006	-0.4624	0.27393	-0.18604	NaN	NaN	NaN	NaN	NaN	NaN
3.23	15.809	30.5349	313.946	-0.085694	0.28662	-0.006836	5.8	-1.7406	133.714	0.18896	0.16553	0.16162	-27.406	62.914	519.69	-0.51758	0.28418	-0.19141	NaN	NaN	NaN	NaN	NaN	NaN
3.232	12.769	26.5123	307.499	-0.081055	0.28174	-0.0053711	23.483	33.053	120.048	0.2237	0.15353	0.16152	-39.7182	82.3035	597.4138	-0.64746	0.30664	-0.19678	NaN	NaN	NaN	NaN	NaN	NaN
3.234	10.758	25.4086	308.663	-0.07959	0.28516	-0.0097656	7.963	13.5401	90.951	0.2495	0.13908	0.16679	-35.5005	137.794	657.9669	-0.74488	0.3252	-0.19604	NaN	NaN	NaN	NaN	NaN	NaN
3.236	11.191	27.136	304.409	-0.085449	0.28662	-0.016113	2.743	15.97186	95.057	0.262	0.12111	0.17109	-26.771	79.467	710.3351	-0.85303	0.34717	-0.18994	NaN	NaN	NaN	NaN	NaN	NaN
3.238	0.897000000000002	32.947	303.671	-0.083984	0.2793	-0.0073242	-3.823	52.819	90.504	0.28105	0.11611	0.19022	-14.6536	72.2642	800.0854	-1.0137	0.37695	-0.17529	NaN	NaN	NaN	NaN	NaN	NaN
3.24	-13.253	32.601	300.82	-0.085938	0.2832	-0.0048828	-5.879	13.1101	87.055	0.29395	0.12695	0.20996	-15.0324	15.5209	882.0836	-1.156	0.39771	-0.15429	NaN	NaN	NaN	NaN	NaN	NaN
3.242	15.117	34.033	297.91	-0.093262	0.2793	-0.0029297	23.536	21.5548	90.495	0.29268	0.10145	0.19502	3.045	40.183	984.068	-1.3047	0.42188	-0.12305	NaN	NaN	NaN	NaN	NaN	NaN
3.244	2.033	17.7233	302.803	-0.097656	0.28711	-0.003418	16.194	25.1827	65.407	0.29317	0.069925	0.20323	4.1592	17.445	1040.286	-1.5366	0.46387	-0.055176	NaN	NaN	NaN	NaN	NaN	NaN
3.246	3.784	24.344	298.154	-0.10254	0.28662	-0.00048828	-14.4	-4.982	77.327	0.29277	0.078518	0.20088	-4.648	-7.752	1047.185	-1.668	0.49121	-0.021484	NaN	NaN	NaN	NaN	NaN	NaN
3.248	0.615000000000002	28.244	290.338	-0.11133	0.2915	-0.00097656	12.692	46.7254	69.331	0.29287	0.090919	0.19776	19.023	-90.0146	1021.075	-1.9468	0.53809	0.040527	NaN	NaN	NaN	NaN	NaN	NaN
3.25	17.393	27.752	307.709	-0.1167	0.29346	0.00097657	12.542	35.5465	32.9879	0.29248	0.094238	0.20313	15.793	-135.147	995.5422	-2.155	0.59009	0.067626	NaN	NaN	NaN	NaN	NaN	NaN
3.252	24.835	29.8377	308.932	-0.12744	0.2959	0.0019531	18.018	31.6146	24.6461	0.28321	0.098926	0.2082	2.888	-157.049	991.2485	-2.3438	0.64258	0.061035	NaN	NaN	NaN	NaN	NaN	NaN
3.254	-4.414	43.273	308.456	-0.13916	0.29736	0.0043945	19.021	51.319	6.13718	0.26719	0.099706	0.21309	-12.053	-138.84	1011.594	-2.498	0.7207	0.048828	NaN	NaN	NaN	NaN	NaN	NaN
3.256	28.989	30.9623	301.688	-0.14502	0.29932	-0.00048828	13.897	-8.3666	27.165	0.24727	0.10049	0.21269	-62.523	-133.9336	1009.542	-2.5156	0.77344	0.037598	NaN	NaN	NaN	NaN	NaN	NaN
3.258	29.187	34.71	311.258	-0.15576	0.30176	0.0078125	18.96	15.599	42.38	0.22764	0.099318	0.21797	-112.946	-141.362	1014.157	-2.4546	0.86182	0.025879	NaN	NaN	NaN	NaN	NaN	NaN
3.26	21.123	27.2626	314.615	-0.16333	0.30078	0.0092774	34.6617	30.0759	15.7005	0.19922	0.092285	0.22656	-111.783	-128.918	980.666	-2.3259	0.91968	0.035889	NaN	NaN	NaN	NaN	NaN	NaN
3.262	10.355	40.371	305.355	-0.16602	0.30615	0.010742	30.204	-13.7102	32.406	0.17158	0.084863	0.22676	-110.311	-122.191	989.328	-2.1675	0.9585	0.028809	NaN	NaN	NaN	NaN	NaN	NaN
3.264	28.683	40.1504	310.766	-0.18311	0.30811	0.01123	5.73399999999999	13.645589	33.299	0.1373	0.077344	0.23213	-113.334	-47.192	980.225	-1.8882	0.93408	-0.0019531	NaN	NaN	NaN	NaN	NaN	NaN
3.266	15.524	40.7963	314.281	-0.18701	0.31104	0.01123	10.866	-17.7754	25.9595	0.098241	0.069531	0.23643	-131.939	-52.895	1009.451	-1.7227	0.88281	-0.025879	NaN	NaN	NaN	NaN	NaN	NaN
3.268	23.782	37.7211	312.579	-0.2002	0.31006	0.0097656	24.768	0.8043	35.94397	0.063769	0.06211	0.23672	-130.235	-21.541	988.584	-1.3945	0.77148	-0.099121	NaN	NaN	NaN	NaN	NaN	NaN
3.27	15.085	37.00597	325.251	-0.20362	0.31617	0.0092774	3.877	51.977	17.4525	0.033691	0.058105	0.23047	-123.964	-85.711	1005.967	-1.1833	0.66284	-0.1294	NaN	NaN	NaN	NaN	NaN	NaN
3.272	7.489	27.2985	343.683	-0.21338	0.31641	0.0019531	6.669	11.3111	42.7598	0.004297	0.055664	0.22724	-94.865	-102.745	1037.756	-1.0132	0.59619	-0.146	NaN	NaN	NaN	NaN	NaN	NaN
3.274	11.577	32.45	351.733	-0.22412	0.32764	0.0073242	4.378	20.0018	54.994	-0.011719	0.052734	0.22695	-61.744	-208.895	1124.244	-0.88281	0.59668	-0.13232	NaN	NaN	NaN	NaN	NaN	NaN
3.276	20.031	29.842	351.061	-0.23193	0.32617	0.0014648	-7.718	21.0609	18.257	-0.026953	0.051172	0.22305	-40.154	-198.112	1155.509	-0.85742	0.64258	-0.12061	NaN	NaN	NaN	NaN	NaN	NaN
3.278	14.537	24.7804	345.961	-0.24365	0.33252	0.0039063	6.01	7.4765	17.2719	-0.038476	0.050977	0.22295	-31.167	-268.958	1218.602	-0.97461	0.74414	-0.17383	NaN	NaN	NaN	NaN	NaN	NaN
3.28	4.745	35.606	362.554	-0.24951	0.33594	0.0031739	15.804	48.8121	19.1161	-0.051758	0.044434	0.21973	-47.018	-238.284	1246.036	-1.0613	0.8147	-0.19995	NaN	NaN	NaN	NaN	NaN	NaN
3.282	15.132	33.3834	364.92	-0.26025	0.33887	-0.0019531	-11.096	32.8255	12.3239	-0.057715	0.045117	0.21855	-51.277	-298.156	1282.256	-1.0972	0.85791	-0.20947	NaN	NaN	NaN	NaN	NaN	NaN
3.284	5.734	45.298	369.803	-0.26514	0.34326	-0.0019531	3.637	29.439	29.5126	-0.054101	0.055078	0.21377	-11.338	-253.521	1325.176	-1.1611	0.85449	-0.20117	NaN	NaN	NaN	NaN	NaN	NaN
3.286	4.402	41.2557	382.5931	-0.26709	0.34229	-0.0058594	14.938	70.919	10.882	-0.050195	0.064844	0.21103	10.788	-298.367	1383.7583	-1.2222	0.84814	-0.18848	NaN	NaN	NaN	NaN	NaN	NaN
3.288	-11.38	31.42978	403.819	-0.27441	0.35059	-0.0063477	-11.137	31.3762	19.5241	-0.043554	0.075391	0.20752	10.857	-233.404	1419.1247	-1.3726	0.86768	-0.1543	NaN	NaN	NaN	NaN	NaN	NaN
3.29	-12.944	32.90221	409.99	-0.28198	0.35181	-0.012695	1.452	42.116	68.625	-0.032227	0.084473	0.20703	13.729	-247.587	1503.369	-1.4851	0.89087	-0.11572	NaN	NaN	NaN	NaN	NaN	NaN
3.292	-0.276	40.5014	414.246	-0.2832	0.35254	-0.018555	4.151	45.275	47.863	-0.019043	0.094434	0.21093	5.67	-149.5728	1538.822	-1.6016	0.93164	-0.10205	NaN	NaN	NaN	NaN	NaN	NaN
3.294	-10.709	45.835	414.3419	-0.28906	0.36035	-0.023926	-10.227	7.3068	43.916	-0.0070312	0.10459	0.2041	46.5573	-158.769	1578.131	-1.7266	0.98242	-0.093262	NaN	NaN	NaN	NaN	NaN	NaN
3.296	6.859	47.647	433.478	-0.29468	0.36328	-0.026123	-1.438	44.2522	40.6479	-0.0011719	0.10537	0.19512	68.5199	-108.539	1588.042	-1.7808	1.0005	-0.089355	NaN	NaN	NaN	NaN	NaN	NaN
3.298	-9.126	46.6799	437.809	-0.29785	0.36914	-0.029785	1.085	5.4287	46.0896	0.019727	0.10391	0.19707	83.329	-148.4694	1573.213	-1.8921	1.019	-0.097168	NaN	NaN	NaN	NaN	NaN	NaN
3.3	4.556	67.242	437.6016	-0.30322	0.37744	-0.037598	1.55200000000001	-13.2131	68.444	0.037598	0.104	0.19189	58.551	-98.06	1549.6053	-1.9763	1.0247	-0.11474	NaN	NaN	NaN	NaN	NaN	NaN
3.302	16.704	65.252	456.469	-0.31055	0.38281	-0.040527	17.136	12.70402	45.517	0.054395	0.11221	0.18379	77.6279	-112.724	1572.5183	-2.0425	1.0298	-0.14111	NaN	NaN	NaN	NaN	NaN	NaN
3.304	16.617	58.109	480.65	-0.31494	0.39209	-0.044434	22.314	-6.1788	30.8134	0.071875	0.11485	0.17998	23.76	-62.362	1568.125	-2.1011	1.0259	-0.18262	NaN	NaN	NaN	NaN	NaN	NaN
3.306	3.729	52.4158	502.447	-0.32789	0.40063	-0.047852	14.517	37.023	41.09	0.085937	0.11914	0.16787	-4.421	-97.769	1604.446	-2.1265	1.019	-0.2041	NaN	NaN	NaN	NaN	NaN	NaN
3.308	-5.861	54.0599	498.182	-0.34717	0.4082	-0.052734	14.457	47.191	50.324	0.099218	0.12246	0.16114	-1.149	-101.756	1640.2313	-2.1528	1.0103	-0.24072	NaN	NaN	NaN	NaN	NaN	NaN
3.31	18.513	56.941	513.659	-0.37744	0.42773	-0.053711	14.135	1.7748	72.131	0.1123	0.12549	0.14844	-21.809	-130.343	1667.527	-2.154	1.0051	-0.27442	NaN	NaN	NaN	NaN	NaN	NaN
3.312	12.132	54.9262	541.426	-0.39502	0.43164	-0.050293	9.744	26.9694	47.016	0.12432	0.13906	0.15293	-42.59131	-102.60646	1703.184	-2.1504	0.98828	-0.30664	NaN	NaN	NaN	NaN	NaN	NaN
3.314	28.751	58.053	552.391	-0.43506	0.45068	-0.052734	20.0764	4.5481	40.6931	0.12578	0.13994	0.14795	-60.722	-95.7682	1726.284	-2.1309	0.9668	-0.35156	NaN	NaN	NaN	NaN	NaN	NaN
3.316	14.653	55.537	535.6025	-0.46191	0.46191	-0.052734	21.947	9.1224	66.464	0.12187	0.13135	0.1374	-84.242	-75.853	1755.201	-2.1191	0.95117	-0.36816	NaN	NaN	NaN	NaN	NaN	NaN
3.318	22.557	54.765	567.412	-0.4834	0.47461	-0.052734	28.2845	41.168	42.2162	0.12158	0.14024	0.12275	-82.7336	-108.4095	1772.009	-2.0835	0.93018	-0.41553	NaN	NaN	NaN	NaN	NaN	NaN
3.32	35.751	63.485	582.442	-0.50439	0.49951	-0.053223	-0.289999999999999	7.6045	31.455	0.12109	0.16016	0.11133	-83.886	-113.3453	1730.991	-2.0506	0.91431	-0.43335	NaN	NaN	NaN	NaN	NaN	NaN
3.322	17.273	61.744	599.385	-0.5127	0.50586	-0.054688	7.596	16.5504	46.0335	0.12617	0.17978	0.10625	-54.532	-102.7466	1717.187	-2.019	0.90674	-0.45752	NaN	NaN	NaN	NaN	NaN	NaN
3.324	32.829	61.024	615.501	-0.52148	0.52539	-0.0625	8.493	0.6051	32.6643	0.125	0.19443	0.10469	-30.458	-69.322	1721.861	-1.978	0.90381	-0.48389	NaN	NaN	NaN	NaN	NaN	NaN
3.326	28.425	60.3853	621.267	-0.52954	0.53467	-0.064697	5.914	-54.4166	80.623	0.1164	0.20732	0.10078	-42.308	-29.8	1732.924	-1.9702	0.89893	-0.49756	NaN	NaN	NaN	NaN	NaN	NaN
3.328	30.001	77.297	632.472	-0.53613	0.53809	-0.067383	5.88	-25.01	98.605	0.11045	0.22461	0.096973	-66.5291	-11.915	1725.121	-1.9424	0.88477	-0.49609	NaN	NaN	NaN	NaN	NaN	NaN
3.33	0.567999999999998	82.831	638.089	-0.54834	0.55322	-0.073242	-3.505	-52.0551	84.56	0.10303	0.24316	0.094238	-71.1303	-1.62	1691.803	-1.9497	0.87598	-0.49243	NaN	NaN	NaN	NaN	NaN	NaN
3.332	1.972	90.019	655.843	-0.55469	0.56055	-0.071289	2.145	-64.0724	139.342	0.096875	0.25713	0.088379	-68.1521	-17.264	1690.107	-1.9624	0.86572	-0.49707	NaN	NaN	NaN	NaN	NaN	NaN
3.334	7.843	84.573	675.941	-0.57031	0.57129	-0.080566	-9.7142	-15.122	150.912	0.087109	0.26758	0.082032	-65.1364	3.3894	1690.746	-2.0005	0.86279	-0.48193	NaN	NaN	NaN	NaN	NaN	NaN
3.336	9.90499999999999	91.625	681.231	-0.58667	0.58911	-0.085205	-41.954	-38.4377	173.5261	0.066407	0.28008	0.084375	-34.692	11.841	1691.181	-2.0151	0.85889	-0.47119	NaN	NaN	NaN	NaN	NaN	NaN
3.338	21.719	89.947	686.418	-0.59961	0.60938	-0.09375	-27.153	3.3655	227.136	0.042481	0.29121	0.080567	-26.907	76.8809	1675.8992	-2.062	0.85596	-0.46436	NaN	NaN	NaN	NaN	NaN	NaN
3.34	-9.249	92.061	711.8	-0.61719	0.62891	-0.10645	-45.3507	38.9818	284.8416	0.01123	0.30469	0.079102	-18.463	74.048	1681.9792	-2.085	0.85156	-0.4541	NaN	NaN	NaN	NaN	NaN	NaN
3.342	18.645	100.441	720.745	-0.625	0.63867	-0.10498	-49.685	36.043	379.7374	-0.033203	0.31211	0.083203	-12.978	82.9752	1655.214	-2.1011	0.85986	-0.44873	NaN	NaN	NaN	NaN	NaN	NaN
3.344	2.681	99.022	727.772	-0.63281	0.66406	-0.11475	-4.41	95.413	476.8518	-0.080176	0.32158	0.084375	41.033	34.8138	1664.5422	-2.1226	0.86084	-0.43115	NaN	NaN	NaN	NaN	NaN	NaN
3.346	18.334	111.807	722.16332	-0.64038	0.68286	-0.12524	1.52	82.8127	566.2681	-0.13135	0.33408	0.084766	84.4206	46.9302	1694.093	-2.1421	0.87061	-0.42041	NaN	NaN	NaN	NaN	NaN	NaN
3.348	4.39299999999999	107.103	744.643	-0.64844	0.7041	-0.13086	-11.44	90.846	676.4021	-0.1958	0.34775	0.089453	91.46202	26.412	1708.497	-2.1465	0.88672	-0.40137	NaN	NaN	NaN	NaN	NaN	NaN
3.35	11.266	111.59	771.637	-0.6582	0.73242	-0.14014	10.664	125.24	765.2149	-0.26563	0.36133	0.090332	100.0335	56.386	1704.585	-2.1472	0.88501	-0.39917	NaN	NaN	NaN	NaN	NaN	NaN
3.352	19.431	105.3895	782.69	-0.66211	0.74414	-0.13916	29.485	74.611	855.7009	-0.34668	0.37519	0.091894	91.482	6.8677	1664.386	-2.1484	0.87109	-0.39453	NaN	NaN	NaN	NaN	NaN	NaN
3.354	8.649	113.36	778.055	-0.67334	0.7749	-0.14893	24.151	78.1	940.3104	-0.44756	0.3872	0.091211	75.6573	36.274	1601.7661	-2.146	0.85693	-0.39795	NaN	NaN	NaN	NaN	NaN	NaN
3.356	16.868	112.2034	794.861	-0.68091	0.79419	-0.15332	-1.41999999999999	46.7359	984.514	-0.56045	0.40322	0.095118	75.9578	17.551	1584.8449	-2.1328	0.85254	-0.3916	NaN	NaN	NaN	NaN	NaN	NaN
3.358	10.654	123.12	822.403	-0.68848	0.81494	-0.15381	22.881	-52.238	1051.541	-0.69473	0.4166	0.095801	70.065	93.032	1554.138	-2.1167	0.84814	-0.37695	NaN	NaN	NaN	NaN	NaN	NaN
3.36	27.998	124.221	817.018	-0.69971	0.84814	-0.16406	55.9995	-75.025	1103.182	-0.84229	0.43262	0.099609	50.868	104.5624	1547.976	-2.1003	0.8518	-0.36596	NaN	NaN	NaN	NaN	NaN	NaN
3.362	23.962	126.173	810.987	-0.70313	0.85742	-0.16895	60.601	-162.75796	1098.798	-1.0098	0.43838	0.10478	28.718	169.971	1546.272	-2.0815	0.85303	-0.36182	NaN	NaN	NaN	NaN	NaN	NaN
3.364	27.355	125.6297	821.971	-0.7124	0.89111	-0.17236	68.349	-215.613	1132.548	-1.1936	0.45166	0.10293	-6.67599999999999	131.6152	1531.566	-2.0171	0.83447	-0.34131	NaN	NaN	NaN	NaN	NaN	NaN
3.366	37.966	135.6097	847.847	-0.72705	0.91406	-0.17431	95.718	-197.856	1114.943	-1.3874	0.47432	0.10996	3.87	177.435	1506.569	-1.9883	0.8252	-0.33496	NaN	NaN	NaN	NaN	NaN	NaN
3.368	43.262	154.452	838.541	-0.73193	0.93408	-0.17725	111.264	-215.935	1082.699	-1.583	0.49209	0.11806	-12.031	140.351	1495.671	-1.9219	0.80664	-0.3252	NaN	NaN	NaN	NaN	NaN	NaN
3.37	38.862	151.853	852.949	-0.7417	0.96338	-0.18408	134.976	-158.525	1075.095	-1.7651	0.51807	0.11719	-8.411	201.613	1451.824	-1.8745	0.78174	-0.31763	NaN	NaN	NaN	NaN	NaN	NaN
3.372	28.493	147.516	861.886	-0.75	0.97266	-0.18506	129.774	-100.761	1022.7108	-1.9188	0.55147	0.13213	-25.406	174.117	1439.035	-1.8198	0.75049	-0.29541	NaN	NaN	NaN	NaN	NaN	NaN
3.374	25.982	151.3055	870.209	-0.75537	0.99268	-0.18896	103.576	-88.765	1050.7432	-2.0378	0.58584	0.14072	-44.518	240.388	1370.1222	-1.7593	0.71924	-0.28711	NaN	NaN	NaN	NaN	NaN	NaN
3.376	22.591	157.0635	869.046	-0.7605	1.01	-0.19556	132.354	-29.84	1071.791	-2.1113	0.61396	0.13799	-63.0882	207.599	1356.0075	-1.7285	0.70313	-0.29102	NaN	NaN	NaN	NaN	NaN	NaN
3.378	32.747	164.268	875.098	-0.76367	1.0234	-0.19971	100.218	-19.7	1065.653	-2.1053	0.63564	0.13174	-64.6754	239.765	1307.8145	-1.6543	0.67773	-0.27051	NaN	NaN	NaN	NaN	NaN	NaN
3.38	31.622	158.2987	886.84	-0.76758	1.0303	-0.20361	83.733	-14.252	1101.887	-2.0581	0.67041	0.12842	-75.619	175.2331	1308.5074	-1.5933	0.64209	-0.24902	NaN	NaN	NaN	NaN	NaN	NaN
3.382	36.324	167.43567	882.82	-0.76855	1.0391	-0.20557	96.9424	6.56999999999999	1091.01	-1.9563	0.71787	0.13809	-92.7028	209.682	1281.4	-1.5581	0.63135	-0.2417	NaN	NaN	NaN	NaN	NaN	NaN
3.384	28.674	168.8063	879.994	-0.77881	1.0474	-0.20508	67.2989	-41.801	1055.892	-1.837	0.74853	0.15918	-70.05	174.208	1271.476	-1.4956	0.59619	-0.22998	NaN	NaN	NaN	NaN	NaN	NaN
3.386	15.612	178.771	879.828	-0.79468	1.0574	-0.20581	56.293	-87.935	1063.3913	-1.7187	0.74502	0.1627	-59.9963	237.764	1222.987	-1.4409	0.56494	-0.21533	NaN	NaN	NaN	NaN	NaN	NaN
3.388	33.231	180.305	896.681	-0.81299	1.063	-0.2041	43.147	-111.771	1039.683	-1.6034	0.70186	0.15527	-62.08	210.3311	1203.197	-1.3872	0.5415	-0.20801	NaN	NaN	NaN	NaN	NaN	NaN
3.39	-2.94	185.411	894.753	-0.84326	1.0688	-0.20068	-8.819	-189.221	1081.479	-1.4531	0.65039	0.15527	-51.26	259.67	1146.2404	-1.3242	0.49902	-0.18945	NaN	NaN	NaN	NaN	NaN	NaN
3.392	20.306	189.4953	884.382	-0.85547	1.0762	-0.19824	-2.268	-237.816	1145.988	-1.3326	0.60996	0.14091	-66.968	248.7167	1106.387	-1.3003	0.47363	-0.18018	NaN	NaN	NaN	NaN	NaN	NaN
3.394	5.922	198.2581	878.92	-0.88379	1.082	-0.1958	-11.595	-280.608	1137.145	-1.2188	0.57695	0.12578	-27.849	320.475	1051.6667	-1.2402	0.44336	-0.1582	NaN	NaN	NaN	NaN	NaN	NaN
3.396	15.147	209.182	888.491	-0.89917	1.0891	-0.1958	-61.566	-338.687	1204.642	-1.1176	0.5664	0.13399	9.765	300.785	1052.761	-1.2061	0.42285	-0.14404	NaN	NaN	NaN	NaN	NaN	NaN
3.398	6.3	216.151	882.862	-0.90918	1.0879	-0.19824	-53.1383	-317.495	1252.056	-1.0608	0.62021	0.18261	23.584	323.216	1021.955	-1.1641	0.396	-0.12256	NaN	NaN	NaN	NaN	NaN	NaN
3.4	-8.753	217.151	870.774	-0.91211	1.0898	-0.19727	-85.91	-297.958	1253.95	-1.084	0.68555	0.17432	26.68576	271.5253	988.93	-1.0981	0.36963	-0.095703	NaN	NaN	NaN	NaN	NaN	NaN
3.402	1.969	216.277	877.081	-0.90381	1.0864	-0.19971	-76.725	-260.303	1309.152	-1.1152	0.73242	0.11006	31.124	276.103	931.066	-1.0786	0.36182	-0.094238	NaN	NaN	NaN	NaN	NaN	NaN
3.404	0.170999999999999	214.1604	875.048	-0.89014	1.0864	-0.20068	-55.047	-172.446	1319.33	-1.0515	0.75205	0.11152	15.522	230.549	892.925	-1.022	0.32568	-0.070313	NaN	NaN	NaN	NaN	NaN	NaN
3.406	17.371	213.0323	880.573	-0.87231	1.0755	-0.20313	-77.641	-159.667	1319.252	-1.0112	0.70869	0.099415	22.272	245.0636	852.016	-0.98339	0.30273	-0.046142	NaN	NaN	NaN	NaN	NaN	NaN
3.408	-10.014	215.491	875.6407	-0.85498	1.0718	-0.20068	-51.4474	-130.843	1364.296	-1.029	0.6792	0.084473	27.351	241.816	803.0604	-0.93115	0.30273	-0.030762	NaN	NaN	NaN	NaN	NaN	NaN
3.41	13.777	205.069	876.2465	-0.82227	1.0625	-0.20313	-45.6509	-93.949	1328.816	-1.084	0.68262	0.07373	56.9351	278.9388	772.09	-0.86914	0.28369	-0.018555	NaN	NaN	NaN	NaN	NaN	NaN
3.412	29.941	203.978	873.485	-0.81006	1.061	-0.20459	-58.7949	-121.299	1327.95	-1.1594	0.69092	0.066504	38.1626	263.9968	721.7794	-0.83594	0.26758	-0.0058594	NaN	NaN	NaN	NaN	NaN	NaN
3.414	3.754	215.658	870.8548	-0.79102	1.0586	-0.20264	-10.163	-95.372	1338.157	-1.2343	0.7044	0.054297	8.647	250.765	686.228	-0.77246	0.24609	0.017578	NaN	NaN	NaN	NaN	NaN	NaN
3.416	13.331	230.05	897.37	-0.78076	1.0576	-0.20727	-56.851	-103.819	1319.59353	-1.2937	0.71377	0.038672	-25.0146	214.5425	669.086	-0.72339	0.22974	0.030762	NaN	NaN	NaN	NaN	NaN	NaN
3.418	18.44	242.991	931.907	-0.7876	1.0571	-0.20557	-44.2345	-144.9226	1380.11	-1.35	0.72383	0.016699	-0.290000000000006	212.584	639.444	-0.67139	0.21826	0.044434	NaN	NaN	NaN	NaN	NaN	NaN
3.42	35.445	272.05	957.0459	-0.81641	1.0664	-0.20898	15.638	-118.4594	1391.8135	-1.4004	0.72266	-0.0019531	-11.07	215.138	609.256	-0.60498	0.1958	0.0625	NaN	NaN	NaN	NaN	NaN	NaN
3.422	12.77	292.5976	979.8096	-0.83936	1.0767	-0.20459	-26.152	-152.111	1420.433	-1.4501	0.72227	-0.025586	-10.109	211.067	554.266	-0.56982	0.18506	0.067871	NaN	NaN	NaN	NaN	NaN	NaN
3.424	36.314	301.5462	1014.2088	-0.8999	1.0942	-0.19482	15.722	-166.026	1480.033	-1.495	0.72813	-0.044727	-33.338	211.044	489.997	-0.50488	0.16797	0.08252	NaN	NaN	NaN	NaN	NaN	NaN
3.426	47.786	302.2853	1055.766	-0.9519	1.1096	-0.19287	31.357	-122.661	1485.8914	-1.5422	0.72695	-0.065039	-43.816	187.825	447.323	-0.45068	0.15845	0.097169	NaN	NaN	NaN	NaN	NaN	NaN
3.428	54.914	322.643	1064.739	-1.0073	1.1274	-0.19189	34.305	-158.484	1537.329	-1.5835	0.73174	-0.084277	-70.24454	197.269	384.643	-0.39648	0.15283	0.10791	NaN	NaN	NaN	NaN	NaN	NaN
3.43	62.098	329.006	1053.119	-1.0757	1.147	-0.18701	75.1104	-130.611	1573.851	-1.6206	0.73779	-0.096191	-68.4762	181.807	354.634	-0.32471	0.13916	0.11572	NaN	NaN	NaN	NaN	NaN	NaN
3.432	56.722	323.53	1067.651	-1.1184	1.156	-0.18335	56.9044	-119.3094	1557.257	-1.6675	0.74912	-0.10342	-51.223	194.867	320.447171	-0.2832	0.13281	0.11621	NaN	NaN	NaN	NaN	NaN	NaN
3.434	96.675	313.603	1080.948	-1.1582	1.168	-0.18652	61.6429	-150.1695	1600.385	-1.7187	0.75205	-0.10459	-46.81	144.777	306.298	-0.19287	0.12646	0.12402	NaN	NaN	NaN	NaN	NaN	NaN
3.436	86.507	292.042	1080.3482	-1.1958	1.1802	-0.18115	88.323	-80.014	1565.702	-1.7722	0.76495	-0.1042	-57.5222505	151.66	262.005	-0.13257	0.11304	0.1289	NaN	NaN	NaN	NaN	NaN	NaN
3.438	120.2078	260.534	1078.0754	-1.2061	1.1875	-0.18311	35.9195	-82.307	1526.798	-1.8296	0.77959	-0.090723	-53.5701	107.273	234.17	-0.069336	0.10352	0.13428	NaN	NaN	NaN	NaN	NaN	NaN
3.44	103.548	230.055	1107.432	-1.2065	1.1958	-0.18408	31.19	-56.813	1526.18	-1.8921	0.7998	-0.07666	-59.2273	139.321	205.6958	0.0078125	0.093262	0.13428	NaN	NaN	NaN	NaN	NaN	NaN
3.442	133.227	205.249	1128.425	-1.1961	1.1926	-0.19018	21.068	10.9032	1476.008	-1.951	0.81719	-0.058203	-37.943	120.858	196.8724	0.050781	0.085938	0.13818	NaN	NaN	NaN	NaN	NaN	NaN
3.444	121.879	168.429	1117.841	-1.1816	1.1914	-0.19434	-2.331	-24.4841	1500.143	-2.0069	0.83486	-0.035743	-38.519	156.375	170.4559	0.12793	0.073242	0.14307	NaN	NaN	NaN	NaN	NaN	NaN
3.446	107.846	142.248	1101.367	-1.1445	1.1758	-0.19043	34.062	6.477	1528.1707	-2.0609	0.85596	-0.010742	-27.195	123.667	173.871	0.1731	0.060302	0.14819	NaN	NaN	NaN	NaN	NaN	NaN
3.448	110.386	115.672	1112.736	-1.126	1.1709	-0.19141	-24.8563	6.901	1511.7371	-2.1139	0.86348	0.004199	-15.778	139.222	133.592	0.21973	0.051758	0.14893	NaN	NaN	NaN	NaN	NaN	NaN
3.45	110.007	92.9139	1122.36	-1.0806	1.1528	-0.19287	-33.0732	-30.565	1558.438	-2.1602	0.86914	0.02002	6.265	64.2802	147.464	0.27148	0.041016	0.14893	NaN	NaN	NaN	NaN	NaN	NaN
3.452	126.4829	82.9894	1123.466	-1.0476	1.135	-0.1897	-6.221	27.232	1545.03	-2.1914	0.875	0.036426	10.478	74.463	150.097	0.30127	0.041016	0.15137	NaN	NaN	NaN	NaN	NaN	NaN
3.454	107.525	71.907	1125.426	-1.0093	1.1216	-0.18848	-47.9071	10.848	1532.174	-2.2051	0.86875	0.048242	14.324	11.4265	142.34	0.34033	0.036133	0.14697	NaN	NaN	NaN	NaN	NaN	NaN
3.456	132.64	57.617	1133.986	-0.95605	1.0977	-0.17578	-27.735	5.829	1547.659	-2.2035	0.86016	0.063476	29.47	44.2003	97.53	0.36597	0.038574	0.15283	NaN	NaN	NaN	NaN	NaN	NaN
3.458	122.192	34.0886	1141.081	-0.92969	1.0898	-0.16748	-29.3721	28.55	1516.3411	-2.1837	0.84951	0.073633	50.8319	14.394	103.135	0.38086	0.039063	0.15186	NaN	NaN	NaN	NaN	NaN	NaN
3.46	93.049	30.299	1131.329	-0.88428	1.0708	-0.14844	-78.446	-44.647	1531.3464	-2.1479	0.83057	0.085449	67.997	71.384	73.292	0.39111	0.032227	0.1543	NaN	NaN	NaN	NaN	NaN	NaN
3.462	106.707	21.2782	1125.857	-0.8479	1.0583	-0.14355	-30.5799	-52.754	1558.204	-2.1089	0.80908	0.093457	53.7465	29.593	71.388	0.38379	0.035645	0.15527	NaN	NaN	NaN	NaN	NaN	NaN
3.464	82.594	16.1277	1120.961	-0.81885	1.0522	-0.13428	-54.2541	-61.4045	1544.033	-2.0691	0.79238	0.10215	64.728	76.447	40.005	0.37207	0.038574	0.1665	NaN	NaN	NaN	NaN	NaN	NaN
3.466	96.193	8.8242	1109.2038	-0.78809	1.041	-0.11621	-75.549	-95.6	1560.582	-2.0383	0.76152	0.10215	29.788	32.5272	34.505	0.36401	0.041016	0.1753	NaN	NaN	NaN	NaN	NaN	NaN
3.468	51.714	2.1106	1094.6261	-0.78027	1.0356	-0.11084	-14.513	-19.8928	1517.756	-2.008	0.74375	0.10781	24.383	59.94	40.1888	0.34473	0.037109	0.17871	NaN	NaN	NaN	NaN	NaN	NaN
3.47	52.961	-17.3673	1112.735	-0.76904	1.0337	-0.093262	-59.788	-14.9693	1475.9	-1.98	0.74561	0.12207	29.733	5.1574	69.781	0.31689	0.044922	0.18896	NaN	NaN	NaN	NaN	NaN	NaN
3.472	27.445	-42.76	1121.871	-0.76562	1.0396	-0.082031	-28.062	11.0984	1474.58	-1.9704	0.77275	0.1376	38.004	49.498	48.642	0.30273	0.050293	0.19531	NaN	NaN	NaN	NaN	NaN	NaN
3.474	-0.271000000000001	-58.377	1106.935	-0.76514	1.0415	-0.072266	-13.014	72.82	1438.7361	-1.9718	0.79424	0.13174	3.955	4.5002	64.17	0.27148	0.048828	0.21094	NaN	NaN	NaN	NaN	NaN	NaN
3.476	3.029	-78.332	1087.455	-0.76904	1.0493	-0.063965	-49.462	42.043	1443.6714	-1.9449	0.79932	0.12158	-21.055	35.4022	37.294	0.24536	0.051513	0.22949	NaN	NaN	NaN	NaN	NaN	NaN
3.478	-9.317	-106.2242	1079.61	-0.77148	1.0527	-0.058105	31.2104	84.762	1456.625	-1.8962	0.78272	0.11748	-32.141	3.9778	27.375	0.21533	0.050293	0.22852	NaN	NaN	NaN	NaN	NaN	NaN
3.48	5.849	-127.1791	1085.838	-0.77539	1.0625	-0.049805	10.209	82.612	1439.386	-1.8711	0.76953	0.12158	-29.176	37.859	19.7725	0.18164	0.054688	0.24756	NaN	NaN	NaN	NaN	NaN	NaN
3.482	-19.465	-132.8098	1052.826	-0.77441	1.0725	-0.041992	12.622	45.382	1435.294	-1.8828	0.77402	0.13232	-14.323	10.813	13.582	0.16504	0.052246	0.25781	NaN	NaN	NaN	NaN	NaN	NaN
3.484	-12.078	-150.9268	1026.5937	-0.77148	1.082	-0.039551	53.6036	92.673	1399.638	-1.9008	0.78945	0.13506	-34.016	16.9595	22.597211	0.12842	0.054688	0.27002	NaN	NaN	NaN	NaN	NaN	NaN
3.486	-32.7475	-167.2386	1030.275	-0.76953	1.0859	-0.027832	3.95	48.4009	1381.548	-1.8941	0.80625	0.13936	-54.18576	-18.8485	30.07	0.1084	0.055176	0.27294	NaN	NaN	NaN	NaN	NaN	NaN
3.488	-37.7206	-180.6905	1026.933	-0.76514	1.0864	-0.030762	46.0314	35.435	1393.99	-1.8662	0.80176	0.13818	-40.152	-12.881	43.377	0.094727	0.059082	0.28125	NaN	NaN	NaN	NaN	NaN	NaN
3.49	-56.6504	-179.7774	1021.19	-0.75146	1.0913	-0.022461	44.36899	62.633	1338.5254	-1.8276	0.7876	0.14014	-51.6367	-24.62	39.856	0.070313	0.04541	0.28955	NaN	NaN	NaN	NaN	NaN	NaN
3.492	-35.4704	-183.4521	1002.829	-0.73828	1.1021	-0.018798	2.509	11.356	1318.4702	-1.7992	0.76719	0.13818	-42.443	18.29	46.102	0.062988	0.041992	0.29004	NaN	NaN	NaN	NaN	NaN	NaN
3.494	-40.4662	-186.01	998.339	-0.72607	1.1079	-0.019043	47.6488	44.328	1314.88	-1.7676	0.75429	0.14072	-41.257	36.3138	32.567	0.047363	0.03418	0.28662	NaN	NaN	NaN	NaN	NaN	NaN
3.496	-45.551	-169.0588	986.56	-0.71045	1.1138	-0.016602	18.829	50.818	1286.751	-1.7375	0.73672	0.13838	-24.394	60.271	37.0913	0.045654	0.033447	0.27979	NaN	NaN	NaN	NaN	NaN	NaN
3.498	-36.3435	-167.4827	967.926	-0.70557	1.1196	-0.015137	-2.003	29.644	1293.839	-1.7088	0.72051	0.14239	-29.935	47.878	4.0553	0.042969	0.03125	0.2793	NaN	NaN	NaN	NaN	NaN	NaN
3.5	-46.3541	-162.911	967.4223	-0.70313	1.1348	-0.016602	39.7332	98.8772	1258.678	-1.6777	0.70703	0.14209	-25.995	43.81	23.9068	0.044434	0.027344	0.27148	NaN	NaN	NaN	NaN	NaN	NaN
3.502	-44.908	-162.204	994.4829	-0.71338	1.148	-0.02124	-2.149	99.135	1229.898	-1.6529	0.68926	0.14649	-21.384	26.0659	26.6907	0.041016	0.023438	0.26416	NaN	NaN	NaN	NaN	NaN	NaN
3.504	-31.7735	-164.468	1005.3443	-0.72412	1.1606	-0.024414	21.007	125.229	1245.521	-1.6274	0.67344	0.15176	1.026	13.518	39.576	0.043945	0.02002	0.25586	NaN	NaN	NaN	NaN	NaN	NaN
3.506	-40.012	-179.8858	1022.272	-0.73779	1.1782	-0.030273	30.806	185.319	1198.753	-1.598	0.65664	0.15684	40.619	21.4799	42.732	0.04834	0.016846	0.24487	NaN	NaN	NaN	NaN	NaN	NaN
3.508	-20.897	-184.5674	1029.14	-0.73975	1.1821	-0.037598	-26.501	147.886	1163.487	-1.5718	0.63525	0.16524	33.463	9.0926	42.1464	0.044922	0.014648	0.24512	NaN	NaN	NaN	NaN	NaN	NaN
3.51	-31.219	-187.974	1039.575	-0.75244	1.1997	-0.043945	11.099	191.898	1138.5747	-1.5542	0.6167	0.16406	28.537	36.156	20.3377	0.053223	0.021484	0.23047	NaN	NaN	NaN	NaN	NaN	NaN
3.512	-15.3081	-182.694	1046.894	-0.76196	1.2043	-0.052978	-26.566	179.613	1102.335	-1.5263	0.60176	0.17236	41.806	20.8238	44.002	0.052246	0.024902	0.229	NaN	NaN	NaN	NaN	NaN	NaN
3.514	-38.9637	-199.3346	1049.514	-0.76807	1.2153	-0.061523	-40.337	131.6936	1103.5156	-1.5	0.58847	0.17861	48.265	41.989	30.0374	0.0625	0.035645	0.22461	NaN	NaN	NaN	NaN	NaN	NaN
3.516	-29.6991	-206.531	1067.262	-0.78174	1.2192	-0.066895	-7.18	182.274	1062.107	-1.4773	0.57129	0.18056	32.567	8.2964	44.7601	0.063233	0.044434	0.22046	NaN	NaN	NaN	NaN	NaN	NaN
3.518	-21.16163	-210.696	1076.166	-0.79541	1.2212	-0.071777	-65.5313	142.8004	1029.9368	-1.4535	0.56074	0.18682	27.54	27.5293	28.7022	0.068848	0.057129	0.2168	NaN	NaN	NaN	NaN	NaN	NaN
3.52	-30.604	-193.778	1080.996	-0.81445	1.2266	-0.073242	-17.969	151.5022	1033.24	-1.4312	0.55322	0.19531	34.9622	0.474	44.775	0.067871	0.071777	0.21094	NaN	NaN	NaN	NaN	NaN	NaN
3.522	-14.534	-185.547	1084.6415	-0.8335	1.2288	-0.075928	7.299	177.265	995.851	-1.4056	0.53623	0.19805	49.001	34.905	42.1852	0.074463	0.084473	0.21021	NaN	NaN	NaN	NaN	NaN	NaN
3.524	-22.7787	-171.99973	1093.641	-0.84619	1.231	-0.075195	-27.521	148.687	979.1355	-1.38	0.51923	0.20049	44.281	-2.095	80.301	0.078125	0.093262	0.20703	NaN	NaN	NaN	NaN	NaN	NaN
3.526	-13.809	-163.8707	1093.298	-0.85938	1.2227	-0.075195	31.397	188.606	957.586	-1.3499	0.50322	0.20361	11.911	23.4733	48.098	0.085938	0.11523	0.20361	NaN	NaN	NaN	NaN	NaN	NaN
3.528	-37.1346	-136.619	1084.761	-0.85742	1.2188	-0.077637	16.717	183.257	946.2114	-1.32	0.48721	0.20762	-17.371	-3.2228	54.971	0.098633	0.12061	0.20508	NaN	NaN	NaN	NaN	NaN	NaN
3.53	-19.83701	-135.956	1080.467	-0.84375	1.207	-0.07666	21.054	163.133	966.102	-1.2871	0.47119	0.20703	-3.334	43.334	15.4549	0.10498	0.13379	0.19922	NaN	NaN	NaN	NaN	NaN	NaN
3.532	-19.6881	-133.18	1098.968	-0.82617	1.1933	-0.074707	58.7193	200.647	911.995	-1.2542	0.45557	0.21221	-17.805	13.2233	19.66205	0.11206	0.14502	0.19288	NaN	NaN	NaN	NaN	NaN	NaN
3.534	-12.324	-131.569	1100.1789	-0.81396	1.1802	-0.074707	21.546	172.485	859.895	-1.216	0.44297	0.20791	-10.652	58.936	19.4662	0.12891	0.16162	0.19141	NaN	NaN	NaN	NaN	NaN	NaN
3.536	-26.265	-116.003	1087.4882	-0.80957	1.1563	-0.062988	42.158	180.921	842.877	-1.1801	0.42305	0.20869	-22.849	14.1746	29.6395	0.13477	0.17334	0.18848	NaN	NaN	NaN	NaN	NaN	NaN
3.538	-39.0191	-119.766	1075.227	-0.81738	1.1465	-0.064941	49.411	213.05	794.741	-1.1409	0.40722	0.20381	-41.733	34.7	12.838	0.13672	0.18164	0.18555	NaN	NaN	NaN	NaN	NaN	NaN
3.54	-30.127	-128.5013	1084.247	-0.84424	1.1392	-0.05957	17.015	179.11	779.798	-1.103	0.39111	0.19971	-37.7572	-11.97892	28.744	0.14063	0.19092	0.17969	NaN	NaN	NaN	NaN	NaN	NaN
3.542	-21.1029	-128.768	1069.884	-0.86962	1.1323	-0.048829	65.2181	206.328	731.764	-1.065	0.37861	0.19668	-44.623	32.0616	37.974	0.14258	0.19825	0.18066	NaN	NaN	NaN	NaN	NaN	NaN
3.544	-20.706	-135.486	1082.456	-0.89404	1.1294	-0.042969	42.3869	177.5116	680.3264	-1.0261	0.36651	0.19092	-36.3247	6.5046	68.972	0.14404	0.20654	0.18164	NaN	NaN	NaN	NaN	NaN	NaN
3.546	-20.2842	-152.686	1078.926	-0.92529	1.1255	-0.029785	42.714	139.8785	690.864	-0.99131	0.35674	0.18506	-28.985	46.6886	53.193	0.13477	0.22217	0.17969	NaN	NaN	NaN	NaN	NaN	NaN
3.548	-20.448	-166.4049	1093.343	-0.93848	1.123	-0.025391	66.3542	177.456	656.888	-0.95273	0.35117	0.18076	-33.173	-5.3157	51.192	0.1333	0.229	0.17725	NaN	NaN	NaN	NaN	NaN	NaN
3.55	-12.832	-151.1164	1080.692	-0.94678	1.1118	-0.0092773	15.718	152.588	620.843	-0.91016	0.34375	0.17139	-34.714	21.6815	11.5858	0.11328	0.23682	0.18311	NaN	NaN	NaN	NaN	NaN	NaN
3.552	0.0650000000000013	-137.0747	1051.1408	-0.94873	1.0977	-0.0036621	45.196	171.083	613.676	-0.86641	0.33418	0.16699	-32.443	-26.471	17.73	0.10278	0.24658	0.17554	NaN	NaN	NaN	NaN	NaN	NaN
3.554	-0.467999999999996	-119.196	1035.3764	-0.94434	1.083	0.0019531	18.618	179.833	567.06	-0.83193	0.32315	0.16094	-24.509	24.6076	7.543	0.093262	0.25879	0.17188	NaN	NaN	NaN	NaN	NaN	NaN
3.556	2.566	-106.105	1033.736	-0.91748	1.064	0.015625	-17.481	134.837	555.035	-0.78545	0.30908	0.1582	0.667000000000002	5.590287	36.854	0.07666	0.27002	0.17139	NaN	NaN	NaN	NaN	NaN	NaN
3.558	15.374	-106.154	1017.341	-0.90771	1.0532	0.015625	34.804	157.253	524.717	-0.75244	0.30732	0.15615	16.95	36.7147	33.46277	0.072266	0.2749	0.16602	NaN	NaN	NaN	NaN	NaN	NaN
3.56	-1.82	-102.322	1007.447	-0.875	1.0352	0.020996	-2.907	142.345	474.045	-0.71191	0.29443	0.14453	17.587	4.1898	62.585	0.054688	0.28174	0.16895	NaN	NaN	NaN	NaN	NaN	NaN
3.562	1.586	-103.6462	1014.149	-0.85278	1.0139	0.021485	-30.586	123.8956	464.331	-0.67715	0.28516	0.13877	11.606	33.535	38.2195	0.044434	0.29126	0.16675	NaN	NaN	NaN	NaN	NaN	NaN
3.564	3.527	-86.268	996.231	-0.8291	0.99414	0.023926	-27.083	128.8614	426.656	-0.64258	0.27246	0.13311	24.974	26.8344	39.415	0.03125	0.30273	0.17041	NaN	NaN	NaN	NaN	NaN	NaN
3.566	19.018	-60.105	974.8719	-0.80322	0.9751	0.032227	-59.4287	89.737	403.708	-0.61172	0.26309	0.12412	39.088	55.708	38.3949	0.0078125	0.31592	0.18018	NaN	NaN	NaN	NaN	NaN	NaN
3.568	-9.541	-54.092	939.4184	-0.78516	0.96289	0.027832	-24.152	92.3822	388.675	-0.57705	0.25586	0.12412	42.439	23.2354	54.561	-0.0029297	0.31738	0.1792	NaN	NaN	NaN	NaN	NaN	NaN
3.57	-12.406	-59.437	924.0681	-0.75684	0.94141	0.024902	-10.717	92.8949	346.716	-0.54248	0.24463	0.1167	45.217	15.603	66.5874	-0.036621	0.33301	0.17676	NaN	NaN	NaN	NaN	NaN	NaN
3.572	14.505	-65.951	923.092	-0.71436	0.92041	0.022461	-44.6642	70.698	339.499	-0.50928	0.23125	0.10879	36.412	-29.088309	85.437	-0.07544	0.34375	0.18311	NaN	NaN	NaN	NaN	NaN	NaN
3.574	0.359	-63.815	916.732	-0.69873	0.90869	0.023926	-26.276	110.817	288.73	-0.46435	0.22051	0.098242	24.003	-32.231	95.6516	-0.12012	0.35205	0.18604	NaN	NaN	NaN	NaN	NaN	NaN
3.576	12.993	-73.666	908.412	-0.66211	0.88574	0.022949	-32.3722	110.328	229.9112	-0.41709	0.21504	0.091211	-4.292	-47.563	152.972	-0.19238	0.35547	0.19092	NaN	NaN	NaN	NaN	NaN	NaN
3.578	-2.764	-85.5283	916.341	-0.63794	0.86743	0.022705	-26.467	96.742	227.6654	-0.36777	0.20518	0.085839	-11.662	-14.058	220.22	-0.23193	0.36523	0.19678	NaN	NaN	NaN	NaN	NaN	NaN
3.58	8.406	-84.54239	903.164	-0.61377	0.84814	0.018555	-9.226	112.003	217.2354	-0.31787	0.19873	0.074219	-36.8267	2.06722	256.178	-0.33105	0.38281	0.19971	NaN	NaN	NaN	NaN	NaN	NaN
3.582	-16.331	-73.689	872.99	-0.58203	0.82617	0.016113	-27.643	75.3116	217.3075	-0.25859	0.1917	0.066309	-26.7374	10.184	332.709	-0.40503	0.38867	0.19971	NaN	NaN	NaN	NaN	NaN	NaN
3.584	-12.076	-73.0329	846.181	-0.56641	0.8125	0.018066	27.648	76.3034	233.076	-0.20039	0.17851	0.049121	-22.022	-1.172	413.151	-0.49707	0.40332	0.20313	NaN	NaN	NaN	NaN	NaN	NaN
3.586	-11.488	-64.4095	827.937	-0.54248	0.78564	0.012207	7.421	96.0792	187.21	-0.14102	0.16836	0.038965	-14.177	5.9742	532.2949	-0.62256	0.42334	0.20703	NaN	NaN	NaN	NaN	NaN	NaN
3.588	-13.8785	-61.3445	819.369	-0.52319	0.77173	0.011231	-8.305	71.39	182.968	-0.078711	0.15654	0.026075	-27.532	42.1301	646.724	-0.69531	0.43115	0.2124	NaN	NaN	NaN	NaN	NaN	NaN
3.59	-27.5942	-51.332	806.878	-0.50244	0.76025	0.0068359	59.2053	85.348	166.481	-0.02002	0.146	0.012207	-11.172	80.1	764.0777	-0.86914	0.44629	0.21191	NaN	NaN	NaN	NaN	NaN	NaN
3.592	-29.799	-48.226	785.869	-0.47998	0.74072	0.0053711	22.729	60.923	105.115	0.032227	0.13252	-0.0045898	1.723	107.847	867.9958	-1.0239	0.45703	0.21069	NaN	NaN	NaN	NaN	NaN	NaN
3.594	-22.699	-45.968	782.651	-0.46777	0.73047	0.0043945	31.051	44.494	117.9445	0.083888	0.12178	-0.020801	31.681	79.729	1013.912	-1.1792	0.47314	0.20703	NaN	NaN	NaN	NaN	NaN	NaN
3.596	-31.7554	-33.19	761.425	-0.44775	0.71631	0.00048828	58.1742	58.53585	97.0606	0.12959	0.1085	-0.037597	49.343	49.294	1108.444	-1.4058	0.50439	0.20361	NaN	NaN	NaN	NaN	NaN	NaN
3.598	-30.5077	-31.838	738.093	-0.42895	0.69922	0.00048828	14.437	20.191	118.024	0.17138	0.10088	-0.060156	68.817	-22.964	1186.453	-1.5137	0.5293	0.19629	NaN	NaN	NaN	NaN	NaN	NaN
3.6	-24.798	-30.5954	714.85	-0.41309	0.68359	-0.0029297	49.1578	36.693	136.919	0.21533	0.096191	-0.077637	30.749	-57.871	1174.782	-1.7227	0.56738	0.17041	NaN	NaN	NaN	NaN	NaN	NaN
3.602	-19.448	-11.87	697.812	-0.39355	0.66797	-0.0053711	38.524	46.1146	109.4974	0.25313	0.078027	-0.092285	28.97	-134.382	1193.462	-1.867	0.60425	0.15405	NaN	NaN	NaN	NaN	NaN	NaN
3.604	-6.471	-15.014	680.261	-0.38623	0.66162	-0.0058594	15.685	33.172	114.215	0.27871	0.065234	-0.11045	41.333	-144.812	1155.852	-1.9785	0.6543	0.13379	NaN	NaN	NaN	NaN	NaN	NaN
3.606	-22.721	-17.734	663.867	-0.37012	0.64746	-0.0097656	45.608	57.734	108.951	0.30918	0.057422	-0.12647	77.977	-204.963	1161.196	-2.0679	0.71729	0.098145	NaN	NaN	NaN	NaN	NaN	NaN
3.608	-18.524	-35.8649	660.86	-0.35718	0.63672	-0.010986	8.107	69.242	88.683	0.32998	0.051367	-0.13955	124.917	-191.485	1107.867	-2.0801	0.75391	0.076172	NaN	NaN	NaN	NaN	NaN	NaN
3.61	-22.8466	-42.2789	655.254	-0.3457	0.625	-0.0063477	0.220999999999997	68.633	78.9878	0.34619	0.035156	-0.14502	154.638	-205.893	1109.339	-2.0117	0.82422	0.056152	NaN	NaN	NaN	NaN	NaN	NaN
3.612	-13.7641	-31.9075	638.609	-0.32861	0.60791	-0.01709	18.444	80.747	62.1455	0.35557	0.030176	-0.16133	133.945	-159.336	1071.146	-1.9043	0.87696	0.041504	NaN	NaN	NaN	NaN	NaN	NaN
3.614	-33.8851	-36.7967	629.076	-0.32275	0.59668	-0.016602	-32.032	44.977	64.1739	0.35967	0.027637	-0.16758	142.459	-137.97	1054.975	-1.7656	0.91406	0.032715	NaN	NaN	NaN	NaN	NaN	NaN
3.616	5.037	-33.5904	616.255	-0.30566	0.58398	-0.018555	-3.002	37.575	84.942	0.36748	0.024903	-0.17266	148.385	-66.1181	1013.546	-1.5547	0.89648	-0.010742	NaN	NaN	NaN	NaN	NaN	NaN
3.618	12.805	-31.8685	590.93	-0.29321	0.57055	-0.02417	-12.265	38.079	64.519	0.36357	0.024609	-0.17988	174.4625	-52.931	1043.784	-1.4248	0.8584	-0.019043	NaN	NaN	NaN	NaN	NaN	NaN
3.62	-4.986	-13.9819	567.801	-0.27832	0.56299	-0.023926	-38.03	23.8315	72.368	0.35059	0.019531	-0.18311	170.521	-46.531	1063.645	-1.1758	0.76758	-0.020508	NaN	NaN	NaN	NaN	NaN	NaN
3.622	-12.994	-10.8764	556.474	-0.26123	0.54492	-0.027344	-12.934	53.16	78.09	0.33789	0.024707	-0.1835	145.5772	-62.361	1073.499	-1.0398	0.72388	-0.022705	NaN	NaN	NaN	NaN	NaN	NaN
3.624	1.276	-9.243	559.44	-0.25635	0.53711	-0.029785	-35.3097	33.815	53.892	0.32168	0.027539	-0.18575	107.6964	-56.3	1060.935	-0.92188	0.70703	-0.021484	NaN	NaN	NaN	NaN	NaN	NaN
3.626	6.657	-15.5601	556.429	-0.2373	0.51953	-0.036133	-12.227	13.040305	54.627	0.30098	0.030664	-0.18027	86.93	-81.793	1077.607	-0.875	0.73242	-0.030762	NaN	NaN	NaN	NaN	NaN	NaN
3.628	-23.3135	-7.1993	530.902	-0.23023	0.50879	-0.037353	-14.039	28.263	20.4019	0.27178	0.03125	-0.17715	61.6732	-112.507	1095.851	-0.86426	0.75684	-0.041016	NaN	NaN	NaN	NaN	NaN	NaN
3.63	-7.341	-16.1222	510.593	-0.21436	0.49609	-0.040527	-59.194	3.673	20.8456	0.24072	0.034668	-0.16797	40.5174	-177.828	1169.6741	-0.87207	0.79883	-0.021973	NaN	NaN	NaN	NaN	NaN	NaN
3.632	-1.237	-9.6803	505.251	-0.20459	0.48682	-0.043457	14.629	16.6955	56.115	0.20703	0.037402	-0.15869	13.743	-237.688	1172.1434	-0.90259	0.82642	-0.012451	NaN	NaN	NaN	NaN	NaN	NaN
3.634	-7.405	11.0743	482.4065	-0.19922	0.48047	-0.045898	-7.998	21.9316	59.55	0.16562	0.041602	-0.1542	-10.769	-319.351	1220.298	-0.95898	0.82813	-0.0063477	NaN	NaN	NaN	NaN	NaN	NaN
3.636	-25.661	15.0136	459.9485	-0.18555	0.46387	-0.044434	-30.849	-4.118	74.022	0.12578	0.044726	-0.14717	-75.617761	-355.502	1261.104	-1.0757	0.84326	0.0097656	NaN	NaN	NaN	NaN	NaN	NaN
3.638	-18.618	7.8718	434.94281	-0.17627	0.45557	-0.052246	30.8546	21.0674	71.867	0.075781	0.052929	-0.1377	-119.139	-360.564	1329.169	-1.1558	0.84033	0.016602	NaN	NaN	NaN	NaN	NaN	NaN
3.64	-7.501	-5.1072	464.153	-0.16455	0.44775	-0.055176	7.017	2.21068	51.154	0.029785	0.058594	-0.12549	-114.462	-311.991	1376.327	-1.3008	0.85938	0.02002	NaN	NaN	NaN	NaN	NaN	NaN
3.642	-28.128	5.294	442.296	-0.15332	0.44238	-0.05957	28.636	3.557	51.093	-0.0042968	0.061328	-0.11797	-108.787	-258.018	1430.668	-1.4002	0.86547	0.015869	NaN	NaN	NaN	NaN	NaN	NaN
3.644	-22.101	1.275	441.84	-0.146	0.43359	-0.058105	51.6621	30.933	18.0517	-0.042285	0.066308	-0.11026	-101.265	-204.0391	1463.6537	-1.4897	0.86084	0.024902	NaN	NaN	NaN	NaN	NaN	NaN
3.646	-16.011	-3.9343	434.034	-0.13135	0.42285	-0.063477	3.993	13.38629	-2.1118	-0.075489	0.069824	-0.10166	-106.254	-181.9251	1507.881	-1.6147	0.85107	0.038086	NaN	NaN	NaN	NaN	NaN	NaN
3.648	-8.294	-0.5649	419.816	-0.1206	0.41186	-0.062745	19.057	16.0095	27.6675	-0.10098	0.075391	-0.094531	-49.776	-134.908	1547.855	-1.6914	0.85352	0.04248	NaN	NaN	NaN	NaN	NaN	NaN
3.65	-24.211	7.6663	392.688	-0.11572	0.40039	-0.067383	48.415	6.8068	24.3237	-0.12451	0.080566	-0.089355	-59.295	-113.97	1575.254	-1.834	0.84473	0.050293	NaN	NaN	NaN	NaN	NaN	NaN
3.652	-40.969	5.588	380.101	-0.10107	0.39014	-0.068848	20.513	-24.7891	57.208	-0.14365	0.087597	-0.086133	-43.192	-85.43	1594.994	-1.9509	0.82544	0.067872	NaN	NaN	NaN	NaN	NaN	NaN
3.654	-17.533	-1.305	372.276	-0.094238	0.38525	-0.067871	52.67492	2.2578	67.934	-0.15976	0.090722	-0.082617	-40.756	-100.431	1578.723	-2.0654	0.82227	0.078613	NaN	NaN	NaN	NaN	NaN	NaN
3.656	-21.388	2.761	374.416	-0.083984	0.37354	-0.070313	39.55823	0.671399999999999	35.285	-0.16953	0.090722	-0.079493	6.328	-100.269	1573.206	-2.1987	0.82861	0.092773	NaN	NaN	NaN	NaN	NaN	NaN
3.658	-6.22	-2.2142	362.4832	-0.074707	0.36499	-0.073974	21.552	15.8807	49.154	-0.17305	0.096777	-0.077832	-1.237	-105.699	1570.791	-2.2632	0.82861	0.09375	NaN	NaN	NaN	NaN	NaN	NaN
3.66	-32.649	3.8535	349.4863	-0.06543	0.35596	-0.071289	44.48	38.0555	18.0577	-0.17285	0.096191	-0.072754	6.372	-94.6833	1580.779	-2.3711	0.8252	0.1001	NaN	NaN	NaN	NaN	NaN	NaN
3.662	4.221	4.7646	350.366	-0.060059	0.34912	-0.074219	-1.283	4.3386	8.446	-0.16162	0.10254	-0.075488	9.407	-103.701	1623.272	-2.4551	0.83984	0.090332	NaN	NaN	NaN	NaN	NaN	NaN
3.664	-10.39	15.06127	329.45	-0.055176	0.34473	-0.071289	9.947	2.86742	16.9072	-0.15302	0.1041	-0.075879	46.749	-111.205	1710.394	-2.4819	0.84814	0.088379	NaN	NaN	NaN	NaN	NaN	NaN
3.666	-2.205	22.7966	323.478	-0.04541	0.3374	-0.072266	18.581	1.27755	5.7045	-0.1335	0.10371	-0.077442	80.14	-148.169	1750.926	-2.5371	0.85938	0.083496	NaN	NaN	NaN	NaN	NaN	NaN
3.668	9.908	18.9174	316.994	-0.045166	0.32983	-0.074463	1.738	-8.6994	46.5	-0.11465	0.10977	-0.074316	143.7564	-149.361	1784.304	-2.5579	0.87037	0.074951	NaN	NaN	NaN	NaN	NaN	NaN
3.67	5.703	24.85631	309.59	-0.048828	0.32031	-0.075195	3.517	22.0116	47.465	-0.093262	0.1084	-0.07666	148.009	-166.266	1781.654	-2.5684	0.87109	0.072266	NaN	NaN	NaN	NaN	NaN	NaN
3.672	17.267	28.6567	299.728	-0.046875	0.31348	-0.07373	-26.851	15.7066	27.455	-0.06875	0.1083	-0.07832	174.57	-128.3799	1784.188	-2.5566	0.88086	0.063477	NaN	NaN	NaN	NaN	NaN	NaN
3.674	-0.273	34.194	283.22	-0.046387	0.31299	-0.073242	-15.158	18.388	37.499	-0.045411	0.11289	-0.080078	152.65	-94.1532	1765.6757	-2.5405	0.89111	0.058594	NaN	NaN	NaN	NaN	NaN	NaN
3.676	12.349	25.614	290.8215	-0.046387	0.30078	-0.070801	-3.238	40.603	15.3251	-0.025488	0.11094	-0.08086	147.093	-31.847	1734.167	-2.4917	0.90088	0.054688	NaN	NaN	NaN	NaN	NaN	NaN
3.678	19.173	18.5564	299.551	-0.047119	0.29663	-0.074219	-44.801	22.4665	14.2477	-0.0046874	0.11074	-0.082324	129.605	-20.97	1712.991	-2.4575	0.89111	0.057373	NaN	NaN	NaN	NaN	NaN	NaN
3.68	22.213	19.0818	298.728	-0.049805	0.29297	-0.071289	-11.289	39.91	30.8933	0.016602	0.11377	-0.085938	130.8229	-26.6331	1716.804	-2.4175	0.90283	0.047363	NaN	NaN	NaN	NaN	NaN	NaN
3.682	6.723	12.7422	283.584	-0.054199	0.28711	-0.071777	-40.634	41.709	20.0698	0.031934	0.11914	-0.090137	100.327	-44.5105	1686.809	-2.3569	0.88135	0.058105	NaN	NaN	NaN	NaN	NaN	NaN
3.684	4.697	6.203	293.764	-0.055664	0.28955	-0.067871	-35.595	11.556	53.564	0.055566	0.12158	-0.10049	64.41	-35.7151	1696.164	-2.3276	0.88428	0.074219	NaN	NaN	NaN	NaN	NaN	NaN
3.686	25.39	7.5955	294.223	-0.0625	0.27246	-0.072266	33.502	0.289999999999999	81.317	0.071973	0.12236	-0.10127	13.577	-17.79	1664.3988	-2.2788	0.88135	0.099609	NaN	NaN	NaN	NaN	NaN	NaN
3.688	15.759	13.11233	278.761	-0.069336	0.27393	-0.069091	-26.5022	-18.418	65.7356	0.086719	0.12764	-0.1081	-30.324	15.3135	1659.3776	-2.2341	0.91138	0.1001	NaN	NaN	NaN	NaN	NaN	NaN
3.69	14.522	14.08158	276.255	-0.074707	0.26904	-0.06543	-16.43	-25.37	97.037	0.098145	0.12988	-0.11377	-7.518	29.1861	1610.474	-2.2246	0.91016	0.077637	NaN	NaN	NaN	NaN	NaN	NaN
3.692	6.317	16.3087	272.433	-0.083984	0.26904	-0.063965	35.382	6.133	111.842	0.10879	0.13564	-0.12598	-9.897	37.688	1596.073	-2.1753	0.87744	0.078125	NaN	NaN	NaN	NaN	NaN	NaN
3.694	4.672	15.6939	286.404	-0.086914	0.26465	-0.060547	4.636	13.6491	141.1095	0.11758	0.1419	-0.1333	-12.226	63.864	1603.463	-2.1445	0.85156	0.087402	NaN	NaN	NaN	NaN	NaN	NaN
3.696	-4.918	16.4805	277.3292	-0.09668	0.25977	-0.059082	52.586	41.011	180.7909	0.11875	0.15088	-0.14346	-58.806	53.5402	1650.773	-2.1172	0.81445	0.10205	NaN	NaN	NaN	NaN	NaN	NaN
3.698	-9.522	9.6307	287.938	-0.10279	0.26001	-0.056152	57.051	51.7581	207.1817	0.11269	0.16016	-0.1499	-58.196	49.14	1655.942	-2.1179	0.80591	0.11988	NaN	NaN	NaN	NaN	NaN	NaN
3.7	13.054	19.5562	294.408	-0.11279	0.26172	-0.055664	18.618	34.002	280.069	0.097168	0.17285	-0.16113	-93.474	24.438	1683.277	-2.1133	0.80811	0.13574	NaN	NaN	NaN	NaN	NaN	NaN
3.702	-1.527	29.9426	279.217	-0.12256	0.25977	-0.048828	59.5393	60.302	362.235	0.068848	0.1834	-0.16865	-53.345	21.397	1653.616	-2.0601	0.81104	0.14648	NaN	NaN	NaN	NaN	NaN	NaN
3.704	5.742	33.306	269.004	-0.13037	0.2583	-0.049805	5.98	85.199	444.117	0.027832	0.19746	-0.17441	-54.3125	-1.643	1658.528	-2.0269	0.8042	0.14551	NaN	NaN	NaN	NaN	NaN	NaN
3.706	-15.686	30.871	261.362	-0.15039	0.26563	-0.049805	-2.097	121.651	542.836	-0.024903	0.20957	-0.1834	-28.133	14.2259	1615.744	-1.9727	0.7666	0.15381	NaN	NaN	NaN	NaN	NaN	NaN
3.708	-5.606	26.27	282.646	-0.16504	0.26367	-0.050781	20.8188	151.606	599.25	-0.093068	0.22012	-0.18906	-72.732	17.642	1587.439	-1.934	0.74902	0.15894	NaN	NaN	NaN	NaN	NaN	NaN
3.71	-19.603	28.38	297.435	-0.17676	0.27002	-0.044922	-21.9182	126.315	656.59	-0.15967	0.23682	-0.18799	-64.671	57.535	1540.21692	-1.894	0.73486	0.15527	NaN	NaN	NaN	NaN	NaN	NaN
3.712	16.193	30.518	287.847	-0.19092	0.27393	-0.043945	-21.4555	118.096	741.3586	-0.24248	0.25234	-0.19746	-78.356	64.353	1540.3915	-1.8438	0.70898	0.15479	NaN	NaN	NaN	NaN	NaN	NaN
3.714	-14.023	24.2767	285.573	-0.20557	0.27515	-0.043213	-45.495	104.3967	794.518	-0.33233	0.26944	-0.19492	-12.815	96.763	1505.0701	-1.8145	0.70264	0.15967	NaN	NaN	NaN	NaN	NaN	NaN
3.716	11.971	32.345	303.457	-0.22119	0.28271	-0.038574	-53.918	74.192	901.329	-0.43467	0.28272	-0.18906	31.62	94.3686	1532.076	-1.7656	0.69336	0.1582	NaN	NaN	NaN	NaN	NaN	NaN
3.718	9.524	24.5634	309.466	-0.24219	0.29248	-0.036133	3.466	36.3822	979.766	-0.54853	0.3003	-0.18252	75.5	143.383	1498.602	-1.741	0.67505	0.16065	NaN	NaN	NaN	NaN	NaN	NaN
3.72	-16.101	30.395	301.454	-0.25098	0.29346	-0.039551	-36.9026	-16.069	999.71	-0.67432	0.32227	-0.16602	80.7693	155.097	1477.696	-1.7104	0.65771	0.16211	NaN	NaN	NaN	NaN	NaN	NaN
3.722	6.281	23.894	316.117	-0.26953	0.30176	-0.037109	-26.829	-93.695	1052.847	-0.81533	0.3542	-0.146	106.0292	211.549	1444.718	-1.6538	0.64893	0.16943	NaN	NaN	NaN	NaN	NaN	NaN
3.724	8.653	21.9352	332.993	-0.27979	0.30884	-0.035156	8.288	-146.513	1038.525	-0.97226	0.38359	-0.11953	102.399	202.468	1427.6166	-1.6382	0.64209	0.16748	NaN	NaN	NaN	NaN	NaN	NaN
3.726	14.838	25.0812	335.238	-0.28857	0.30908	-0.035645	-53.6574	-177.5362	1049.666	-1.1539	0.41289	-0.086328	146.2019	215.55	1408.5919	-1.5981	0.62549	0.17188	NaN	NaN	NaN	NaN	NaN	NaN
3.728	-8.535	18.0905	343.935	-0.30273	0.31445	-0.035156	-28.8428	-170.165	1083.618	-1.3509	0.4417	-0.039649	143.862	196.326	1400.709	-1.5681	0.61304	0.17163	NaN	NaN	NaN	NaN	NaN	NaN
3.73	13.334	25.1567	346.839	-0.30664	0.31982	-0.035156	-79.893	-145.256	1049.406	-1.5625	0.47852	0.0039063	152.4155	202.1538	1340.9736	-1.543	0.60547	0.1748	NaN	NaN	NaN	NaN	NaN	NaN
3.732	13.328	34.02	363.073	-0.31592	0.32324	-0.033691	-130.128	-147.244	1062.48	-1.7883	0.52012	0.045606	121.0255	184.078	1310.478	-1.5078	0.59766	0.17236	NaN	NaN	NaN	NaN	NaN	NaN
3.734	-7.77	35.22	356.981	-0.32105	0.33033	-0.037109	-75.2183	-133.508	1062.382	-2.0012	0.56074	0.088282	96.741	174.2764	1256.4339	-1.4883	0.58789	0.1748	NaN	NaN	NaN	NaN	NaN	NaN
3.736	-0.449999999999999	27.4397	374.07	-0.32861	0.34033	-0.038574	-134.199	-95.434	1028.766	-2.1918	0.59512	0.1207	81.733	144.545	1240.8186	-1.4492	0.57178	0.16992	NaN	NaN	NaN	NaN	NaN	NaN
3.738	-4.376	33.1996	379.805	-0.33447	0.3457	-0.035645	-142.22	-80.775	1045.664	-2.3365	0.62285	0.12783	72.017	154.7156	1205.9414	-1.4148	0.56079	0.16894	NaN	NaN	NaN	NaN	NaN	NaN
3.74	24.501	39.1461	390.8	-0.33789	0.34766	-0.035645	-101.109	-24.196	1025.524	-2.4292	0.66064	0.12695	91.108	162.7049	1181.21	-1.375	0.54492	0.16357	NaN	NaN	NaN	NaN	NaN	NaN
3.742	-3.726	45.4279	410.162	-0.34912	0.35889	-0.037109	-146.073	7.974	1005.52	-2.4534	0.71299	0.11523	76.317	195.65	1154.274	-1.3198	0.51904	0.15234	NaN	NaN	NaN	NaN	NaN	NaN
3.744	0.948999999999998	44.2874	423.6988	-0.35693	0.36303	-0.032959	-87.832	-10.287	1014.634	-2.4167	0.76963	0.10928	69.666	232.222	1123.369	-1.2925	0.50635	0.14844	NaN	NaN	NaN	NaN	NaN	NaN
3.746	-0.103999999999999	35.6992	447.597	-0.36377	0.36816	-0.033203	-40.649	-24.289	979.827	-2.3229	0.81299	0.10693	19.147	279.686	1074.4994	-1.2266	0.47852	0.1416	NaN	NaN	NaN	NaN	NaN	NaN
3.748	-4.885	51.787	458.086	-0.37158	0.37402	-0.029297	-42.4713	-70.348	986.732	-2.1952	0.82314	0.078418	-4.995	308.624	1029.413	-1.1802	0.45898	0.1311	NaN	NaN	NaN	NaN	NaN	NaN
3.75	-3.251	45.8979	467.543	-0.37988	0.37695	-0.026855	3.253	-110.804	1040.663	-1.9883	0.77734	0.040039	-8.708	303.652	1012.087	-1.1348	0.42969	0.12207	NaN	NaN	NaN	NaN	NaN	NaN
3.752	-38.1899	51.881	469.607	-0.3916	0.38867	-0.027344	-36.9964	-126.844	1049.341	-1.7334	0.69395	0.0045897	-31.551	280.392	957.241	-1.0581	0.40771	0.10303	NaN	NaN	NaN	NaN	NaN	NaN
3.754	8.574	53.464	485.037	-0.39868	0.39233	-0.022949	-30.544	-177.152	1100.7009	-1.4828	0.6168	-0.037305	-27.127	261.232	921.489	-1.0327	0.39014	0.099609	NaN	NaN	NaN	NaN	NaN	NaN
3.756	-22.624	65.31	482.405	-0.40967	0.40088	-0.023438	13.981	-209.989	1118.486	-1.27	0.54062	-0.08457	-21.042	256.219	867.491	-0.95898	0.36621	0.083008	NaN	NaN	NaN	NaN	NaN	NaN
3.758	-5.156	69.742	497.6015	-0.42725	0.41309	-0.026367	-28.658	-223.1888	1127.8834	-1.0891	0.49023	-0.14805	-51.724	257.462	830.634	-0.92065	0.34106	0.072998	NaN	NaN	NaN	NaN	NaN	NaN
3.76	-15.527	65.8483	524.287	-0.43408	0.42432	-0.024902	19.641	-271.219	1190.222	-0.94873	0.44971	-0.17725	-46.677	253.517	779.741	-0.87305	0.33203	0.0625	NaN	NaN	NaN	NaN	NaN	NaN
3.762	6.985	67.146	550.5498	-0.45654	0.43018	-0.016113	9.883	-234.033	1197.203	-0.85244	0.45108	-0.18115	-53.36	229.425	733.0605	-0.81006	0.30127	0.049805	NaN	NaN	NaN	NaN	NaN	NaN
3.764	-7.947	67.8285	571.211	-0.4729	0.44263	-0.016357	-15.975	-215.692	1243.3757	-0.83008	0.5	-0.15205	-25.897	233.63	684.3321	-0.78271	0.29736	0.04248	NaN	NaN	NaN	NaN	NaN	NaN
3.766	-25.535	72.577	582.221	-0.4917	0.4541	-0.01709	48.6541	-195.561	1298.394	-0.90039	0.61016	-0.14697	-8.695	217.1303	695.602	-0.72656	0.27344	0.026367	NaN	NaN	NaN	NaN	NaN	NaN
3.768	-9.448	70.1879	602.738	-0.52002	0.4751	-0.018555	22.1	-125.108	1312.161	-0.9418	0.70391	-0.18897	26.963	228.436	660.746	-0.67969	0.26514	0.019043	NaN	NaN	NaN	NaN	NaN	NaN
3.77	-14.252	79.28	596.5703	-0.53516	0.48535	-0.018555	41.477	-142.647	1349.465	-0.9126	0.6958	-0.2207	9.281	201.342	661.356	-0.64111	0.24902	0.016602	NaN	NaN	NaN	NaN	NaN	NaN
3.772	0.812999999999999	79.685	609.4188	-0.56787	0.50488	-0.020996	84.56705	-128.453	1356.222	-0.90068	0.64267	-0.19482	22.637	207.188	595.786	-0.59326	0.23193	0.0073242	NaN	NaN	NaN	NaN	NaN	NaN
3.774	-6.982	77.053	610.93954	-0.60107	0.51709	-0.015625	17.798	-93.44	1333.754	-0.98652	0.60586	-0.15976	41.331	171.2423	576.822	-0.56641	0.22217	0.0053711	NaN	NaN	NaN	NaN	NaN	NaN
3.776	-3.931	63.036	652.647	-0.63232	0.53564	-0.017578	37.306	-116.587	1377.997	-1.1416	0.60938	-0.125	75.572	192.355	514.864	-0.50391	0.20996	0.0058594	NaN	NaN	NaN	NaN	NaN	NaN
3.778	5.531	66.095	677.484	-0.67188	0.56055	-0.015625	40.7258	-63.782	1353.3195	-1.306	0.63926	-0.098241	88.9628	179.8408	474.283	-0.46435	0.19629	0.0041504	NaN	NaN	NaN	NaN	NaN	NaN
3.78	-1.221	64.7471	682.6337	-0.68701	0.57471	-0.017578	-4.961	-68.429	1354.116	-1.4507	0.67529	-0.068848	102.442	202.7927	390.9418	-0.42725	0.19141	0	NaN	NaN	NaN	NaN	NaN	NaN
3.782	-8.695	71.5945	700.9911	-0.72803	0.60791	-0.011719	15.206	-99.1721	1404.3686	-1.5491	0.70166	-0.044531	77.582	162.805	367.7832	-0.37061	0.1792	-0.0043945	NaN	NaN	NaN	NaN	NaN	NaN
3.784	8.633	76.7331	713.995	-0.75464	0.62744	-0.014404	-38.646	-69.9795	1411.0437	-1.6426	0.73476	-0.03457	71.972	156.641	294.175	-0.34229	0.16748	-0.0019531	NaN	NaN	NaN	NaN	NaN	NaN
3.786	24.741	89.798	722.827	-0.77686	0.65283	-0.0019531	-32.408	-96.4309	1466.144	-1.7176	0.75586	-0.043946	51.633	107.187	294.623	-0.29346	0.14795	-0.0014648	NaN	NaN	NaN	NaN	NaN	NaN
3.788	-17.81	98.859	725.362	-0.80566	0.68457	-0.010254	9.805	-95.46722	1525.504	-1.7783	0.77363	-0.047461	82.76	124.413	231.81	-0.26538	0.1355	-0.003418	NaN	NaN	NaN	NaN	NaN	NaN
3.79	-17.6001	96.348	741.497	-0.81445	0.69824	-0.0092773	-50.55961	-69.324	1519.854	-1.8296	0.7915	-0.054688	71.8161	103.7754	235.659	-0.23242	0.11719	0.0048828	NaN	NaN	NaN	NaN	NaN	NaN
3.792	-4.705	91.417	752.741	-0.82959	0.72412	-0.0029297	-17.925	-137.252	1568.568	-1.8712	0.79893	-0.069824	81.4839	136.071	226.037	-0.17969	0.11816	-0.00097656	NaN	NaN	NaN	NaN	NaN	NaN
3.794	-19.5311	112.051	768.088	-0.84571	0.74366	-0.0053711	10.347	-115.0311	1569.065	-1.9062	0.80137	-0.081055	7.456	108.938	230.244	-0.16016	0.10059	0	NaN	NaN	NaN	NaN	NaN	NaN
3.796	-13.91	106.334	778.7383	-0.85156	0.75977	-0.0063477	-22.712	-115.1714	1555.706	-1.936	0.80527	-0.092383	0.243000000000002	126.128	187.8723	-0.11035	0.091797	0.0014648	NaN	NaN	NaN	NaN	NaN	NaN
3.798	-23.4057	103.3904	788.816	-0.85693	0.78076	-0.010742	15.055	-134.441	1566.527	-1.9681	0.80967	-0.11172	-13.971	87.9433	180.223	-0.067383	0.078125	0	NaN	NaN	NaN	NaN	NaN	NaN
3.8	0.817999999999998	110.2631	803.958	-0.85303	0.7915	-0.01416	-3.568	-65.378	1523.4666	-1.9922	0.81445	-0.13232	-15.558	111.18	140.216	-0.049316	0.07373	-0.003418	NaN	NaN	NaN	NaN	NaN	NaN
3.802	-27.6018	130.457	803.609	-0.84326	0.81152	-0.019043	-30.976	-77.4547	1531.723	-2.0007	0.80518	-0.15088	-53.73	69.0302	143.9404	-0.012695	0.063477	-0.012695	NaN	NaN	NaN	NaN	NaN	NaN
3.804	-5.126	128.16	811.835	-0.83569	0.83081	-0.023437	12.103	-53.1768	1553.392	-2.0039	0.80078	-0.16855	-63.922	65.59	116.426	0.029785	0.047119	-0.0070801	NaN	NaN	NaN	NaN	NaN	NaN
3.806	-27.8324	127.592	830.008	-0.82617	0.8418	-0.025391	-11.635	-3.026	1510.378	-2.0074	0.79336	-0.18183	-81.89429	28.6748	118.941	0.060547	0.039551	-0.013672	NaN	NaN	NaN	NaN	NaN	NaN
3.808	-22.1503	113.534	846.548	-0.81201	0.86377	-0.026855	3.539	-54.37	1539.838	-2.0123	0.78809	-0.1916	-77.1049	33.521	94.407	0.085938	0.02832	-0.025391	NaN	NaN	NaN	NaN	NaN	NaN
3.81	-26.646	121.546	844.422	-0.81055	0.87109	-0.027832	32.076	-17.0915	1536.857	-2.021	0.78174	-0.2124	-70.54074	-0.49	118.727	0.10449	0.026855	-0.036621	NaN	NaN	NaN	NaN	NaN	NaN
3.812	-25.927	122.601	852.892	-0.80859	0.89258	-0.03418	-21.125	-9.3584	1512.3533	-2.0209	0.7752	-0.22266	-63.866	38.689	85.812	0.13232	0.010254	-0.041016	NaN	NaN	NaN	NaN	NaN	NaN
3.814	-12.325	116.3587	878.53	-0.80787	0.90454	-0.035401	37.789	-35.257	1535.2343	-2.0035	0.75977	-0.23614	-58.31226	38.103	76.568	0.15161	-0.00024415	-0.049316	NaN	NaN	NaN	NaN	NaN	NaN
3.816	-12.36	132.818	884.083	-0.81201	0.92627	-0.040039	26.448	30.854	1502.1884	-1.9832	0.7457	-0.24512	-31.114	76.293	43.8073	0.1665	-0.012695	-0.057129	NaN	NaN	NaN	NaN	NaN	NaN
3.818	-21.691	131.2675	885.076	-0.81592	0.94189	-0.039063	4.877	-6.7317	1517.4608	-1.9623	0.72071	-0.25391	-38.688	68.452	45.468	0.18115	-0.020508	-0.070801	NaN	NaN	NaN	NaN	NaN	NaN
3.82	-30.539	130.738	877.207	-0.82031	0.94922	-0.041992	87.3615	-6.0885	1535.071	-1.9473	0.70508	-0.26611	-39.73	68.201	48.1981	0.18945	-0.029297	-0.075195	NaN	NaN	NaN	NaN	NaN	NaN
3.822	-9.929	135.23	893.507	-0.84033	0.97314	-0.043457	53.605	17.8481	1514.834	-1.939	0.68261	-0.27383	-34.471	27.5454	52.026	0.19629	-0.037598	-0.086914	NaN	NaN	NaN	NaN	NaN	NaN
3.824	4.52	135.342	899.632	-0.85425	0.9895	-0.04419	62.2032	-36.8849	1531.506	-1.9297	0.66191	-0.27598	-4.393	39.41701	54.089	0.19165	-0.045899	-0.092285	NaN	NaN	NaN	NaN	NaN	NaN
3.826	-10.344	143.828	897.528	-0.87109	1.0029	-0.045898	80.6939	-18.7085	1544.737	-1.9293	0.65137	-0.28183	-3.962	24.696	48.5553	0.18652	-0.046387	-0.088867	NaN	NaN	NaN	NaN	NaN	NaN
3.828	-1.137	138.7505	918.047	-0.9043	1.0215	-0.041992	17.447	-25.353	1515.419	-1.9279	0.63496	-0.28535	25.4	40.438226	67.397	0.18066	-0.05127	-0.092285	NaN	NaN	NaN	NaN	NaN	NaN
3.83	9.798	143.8762	909.317	-0.91943	1.0337	-0.042969	70.03787	-60.054	1500.976	-1.9248	0.62305	-0.28467	28.04	26.0747	58.34	0.1709	-0.05127	-0.097168	NaN	NaN	NaN	NaN	NaN	NaN
3.832	0.0450000000000017	157.236	907.324	-0.95605	1.0527	-0.044434	58.381	11.243	1446.9628	-1.9327	0.61123	-0.28379	43.397	22.3454	26.3057	0.14844	-0.057129	-0.094238	NaN	NaN	NaN	NaN	NaN	NaN
3.834	-20.424	165.782	904.009	-0.98364	1.0676	-0.043945	12.447	2.214	1424.012	-1.9399	0.60625	-0.28457	61.665	2.332	-0.0599999999999987	0.12744	-0.061036	-0.093994	NaN	NaN	NaN	NaN	NaN	NaN
3.836	1.375	160.3135	914.75	-1.0088	1.083	-0.034668	53.509	31.7819	1438.2262	-1.9395	0.6082	-0.28028	77.31439	0.4314	4.631	0.10889	-0.066406	-0.091309	NaN	NaN	NaN	NaN	NaN	NaN
3.838	10.507	165.048	912.118	-1.0352	1.1035	-0.041016	-1.264	81.689	1419.594	-1.9409	0.60918	-0.28105	60.599	-18.453	19.9031	0.081055	-0.074219	-0.088379	NaN	NaN	NaN	NaN	NaN	NaN
3.84	7.994	171.183	906.472	-1.0483	1.1118	-0.044434	23.051	44.618	1425.027	-1.9468	0.61377	-0.27783	62.9051	2.298	49.099	0.071777	-0.072754	-0.086426	NaN	NaN	NaN	NaN	NaN	NaN
3.842	5.23	168.7172	906.505	-1.0591	1.1274	-0.043945	51.999	83.966	1428.063	-1.9468	0.61338	-0.28477	78.4473	16.1886	48.039	0.041992	-0.076172	-0.088379	NaN	NaN	NaN	NaN	NaN	NaN
3.844	-8.224	153.6847	935.794	-1.064	1.1319	-0.049561	-7.507	88.486	1385.416	-1.9448	0.62002	-0.28544	47.066	22.0154	54.573	0.030274	-0.079101	-0.082764	NaN	NaN	NaN	NaN	NaN	NaN
3.846	11.998	144.9432	945.547	-1.062	1.1353	-0.050293	42.941	56.035	1381.356	-1.9323	0.62002	-0.28741	50.571	25.4624	63.108	0.015625	-0.081055	-0.084961	NaN	NaN	NaN	NaN	NaN	NaN
3.848	-14.237	171.154	941.949	-1.0601	1.1333	-0.056152	21.892	126.589	1318.377	-1.9183	0.62315	-0.29239	13.404	24.8409	61.01	0.0014648	-0.078125	-0.08252	NaN	NaN	NaN	NaN	NaN	NaN
3.85	-5.772	194.7384	944.9683	-1.0525	1.1341	-0.062012	-12.346	94.808	1296.272	-1.9043	0.62891	-0.29248	0.429000000000002	34.871	24.728	-0.0048828	-0.078125	-0.081543	NaN	NaN	NaN	NaN	NaN	NaN
3.852	-29.3477	232.375	982.751	-1.0508	1.1387	-0.065918	32.203	89.904	1290.8451	-1.8807	0.63008	-0.29278	10.77	44.8524	28.4974	-0.013184	-0.077637	-0.082031	NaN	NaN	NaN	NaN	NaN	NaN
3.854	-18.4301	254.427	1019.772	-1.0698	1.1431	-0.076172	-24.854	108.751	1277.6197	-1.8521	0.62333	-0.29374	-1.348	37.5556	12.494	-0.018799	-0.071045	-0.08081	NaN	NaN	NaN	NaN	NaN	NaN
3.856	-34.3955	269.5563	1042.3915	-1.0879	1.1484	-0.076172	9.01	51.202	1301.034	-1.8173	0.61754	-0.29298	-48.9337	12.09192	40.434	-0.02002	-0.068848	-0.083008	NaN	NaN	NaN	NaN	NaN	NaN
3.858	-34.804	263.9906	1067.36976	-1.1377	1.1582	-0.072754	26.493	91.60963	1309.029	-1.7816	0.60857	-0.28506	-40.706	-6.9065	17.1409	-0.027344	-0.063477	-0.088867	NaN	NaN	NaN	NaN	NaN	NaN
3.86	-52.907	285.5545	1123.25	-1.185	1.1709	-0.0708	-27.969	98.278	1297.344	-1.7598	0.59277	-0.28857	-48.36	3.507	19.4359	-0.026855	-0.063965	-0.089844	NaN	NaN	NaN	NaN	NaN	NaN
3.862	-66.305	304.52	1158.665	-1.2397	1.1821	-0.069824	23.636	71.4153	1272.069	-1.7295	0.57331	-0.2812	-46.598	28.161	17.6713	-0.02832	-0.057129	-0.094727	NaN	NaN	NaN	NaN	NaN	NaN
3.864	-62.006	320.318	1174.599	-1.3125	1.2031	-0.065918	36.204	132.428	1217.001	-1.7063	0.56166	-0.26542	-48.856	26.5548	68.7	-0.026367	-0.058349	-0.097168	NaN	NaN	NaN	NaN	NaN	NaN
3.866	-65.117	316.783	1164.395	-1.3535	1.2129	-0.060547	15.195	116.749	1197.659	-1.6843	0.54914	-0.25962	-69.7993	26.8711	44.035	-0.023926	-0.056641	-0.1001	NaN	NaN	NaN	NaN	NaN	NaN
3.868	-62.162	296.65	1159.1889	-1.418	1.2305	-0.064453	46.892	131.631	1195.83	-1.6567	0.53333	-0.2473	-80.74199	6.143816	38.98	-0.012207	-0.043457	-0.10303	NaN	NaN	NaN	NaN	NaN	NaN
3.87	-53.411	278.971	1150.5664	-1.4627	1.2478	-0.062256	22.789	176.634	1163.723	-1.6318	0.51563	-0.23633	-45.228	25.916	17.503	-0.010254	-0.039551	-0.10742	NaN	NaN	NaN	NaN	NaN	NaN
3.872	-65.183	257.993	1149.305	-1.4858	1.2544	-0.059082	47.218	127.676	1167.966	-1.6063	0.5041	-0.22255	-71.0017	2.36279	42.0869	-0.0019531	-0.027344	-0.10938	NaN	NaN	NaN	NaN	NaN	NaN
3.874	-58.111	239.198	1150.544	-1.4819	1.2603	-0.061035	55.8026	163.402	1135.477	-1.5795	0.49003	-0.21237	-55.461	19.3455	43.7833	-0.00048827	-0.021484	-0.11231	NaN	NaN	NaN	NaN	NaN	NaN
3.876	-47.19	219.159	1143	-1.4756	1.2588	-0.067383	-1.853	164.382	1103.315	-1.5535	0.47737	-0.19933	-43.155	8.69223	48.8317	0.0039063	-0.0078125	-0.11279	NaN	NaN	NaN	NaN	NaN	NaN
3.878	-50.522	191.2887	1126.906	-1.4199	1.2461	-0.078125	35.072	137.72	1105.052	-1.5195	0.45922	-0.18804	10.063	39.444	35.0936	0.01123	0.013184	-0.11865	NaN	NaN	NaN	NaN	NaN	NaN
3.88	-56.915	159.4085	1112.122	-1.3423	1.2285	-0.081299	37.667	191.077	1056.635	-1.4858	0.44385	-0.17139	4.882	23.84969	43.7628	0.01123	0.022461	-0.11182	NaN	NaN	NaN	NaN	NaN	NaN
3.882	-45.754	152.57	1104.787	-1.2534	1.2017	-0.085938	7.108	147.4893	1029.379	-1.4496	0.42644	-0.15846	35.785	37.515	33.05	0.01123	0.041504	-0.11523	NaN	NaN	NaN	NaN	NaN	NaN
3.884	-54.426	156.12829	1098.4639	-1.1284	1.1665	-0.10107	45.4027	152.46	993.793	-1.4111	0.40954	-0.15614	25.81	6.8861	29.43	0.013671	0.057618	-0.11206	NaN	NaN	NaN	NaN	NaN	NaN
3.886	-56.169	174.992	1105.796	-1.0796	1.1431	-0.10449	-10.941	188.116	950.7112	-1.3696	0.39204	-0.1378	49.631	34.835	-6.579	0.019043	0.072754	-0.10986	NaN	NaN	NaN	NaN	NaN	NaN
3.888	-50.487	168.901	1099.017	-0.9917	1.1079	-0.12109	7.006	154.4742	957.808	-1.3277	0.37617	-0.12578	45.9594	24.489	13.8683	0.021484	0.093262	-0.1123	NaN	NaN	NaN	NaN	NaN	NaN
3.89	-54.823	158.698	1095.351	-0.94556	1.0813	-0.12866	30.182	190.651	944.22	-1.2866	0.36377	-0.11865	67.2802	57.499	28.786	0.026367	0.099121	-0.1123	NaN	NaN	NaN	NaN	NaN	NaN
3.892	-44.076	144.075	1094.437	-0.91406	1.0645	-0.1416	-39.5919	177.502	914.289	-1.2569	0.34446	-0.10655	55.3112	26.7707	49.567	0.036133	0.11914	-0.10986	NaN	NaN	NaN	NaN	NaN	NaN
3.894	-54.301	153.692	1099.1338	-0.87842	1.0688	-0.1582	12.649	133.6813	919.979	-1.2204	0.33089	-0.096291	59.505	30.917	53.046	0.043213	0.13208	-0.11181	NaN	NaN	NaN	NaN	NaN	NaN
3.896	-48.484	153.879	1115.822	-0.87061	1.0659	-0.16748	0.0950000000000024	173.78	869.958	-1.1824	0.3159	-0.085104	59.8952	12.3505	47.928	0.046875	0.14502	-0.11523	NaN	NaN	NaN	NaN	NaN	NaN
3.898	-48.323	155.192	1124.674	-0.85303	1.0649	-0.18506	-40.502	142.7672	842.533	-1.1503	0.30127	-0.080056	44.252	27.6919	38.98	0.055176	0.15625	-0.11523	NaN	NaN	NaN	NaN	NaN	NaN
3.9	-28.587	139.62	1111.8805	-0.84448	1.0633	-0.19361	-5.362	152.4546	810.157	-1.1172	0.28613	-0.067383	34.016	13.2696	72.592	0.057129	0.16016	-0.11377	NaN	NaN	NaN	NaN	NaN	NaN
3.902	-42.831	115.4381	1085.5959	-0.83203	1.0615	-0.20313	-63.4651	190.155	735.7721	-1.086	0.2787	-0.058527	27.08	14.1303	46.405	0.067383	0.17773	-0.13086	NaN	NaN	NaN	NaN	NaN	NaN
3.904	-49.338	93.7809	1087.056	-0.82764	1.0513	-0.22314	-36.621	149.577	723.0889	-1.0571	0.26224	-0.045126	23.148	-10.6154	16.3079	0.069091	0.18677	-0.12671	NaN	NaN	NaN	NaN	NaN	NaN
3.906	-43.894	79.8551	1093.52	-0.81641	1.0498	-0.22656	-13.837	183.4297	699.712	-1.028	0.25629	-0.038455	10.428	6.0351	15.618	0.070313	0.19092	-0.13232	NaN	NaN	NaN	NaN	NaN	NaN
3.908	-39.1632	77.736	1090.27	-0.79395	1.041	-0.23633	-60.834	171.5626	671.363	-0.99738	0.24939	-0.029344	-23.587	-13.24687	18.1901	0.061035	0.20361	-0.13232	NaN	NaN	NaN	NaN	NaN	NaN
3.91	-30.2879	64.095	1061.497	-0.77783	1.0386	-0.25488	0.471	140.204	671.865	-0.96191	0.24512	-0.016602	-35.17	18.836339	43.25	0.056152	0.20557	-0.13721	NaN	NaN	NaN	NaN	NaN	NaN
3.912	-29.1619	31.6581	1037.8475	-0.75928	1.0288	-0.26025	-27.4556	191.732	628.186	-0.92792	0.2367	-0.0063102	-55.858	20.84992	45.482	0.039063	0.21436	-0.14502	NaN	NaN	NaN	NaN	NaN	NaN
3.914	1.947	10.6225	1052.084	-0.73047	1.0244	-0.27051	-31.757	150.594	600.1473	-0.8977	0.23347	0.0022181	-46.275	41.9123	64.958	0.02124	0.21851	-0.15259	NaN	NaN	NaN	NaN	NaN	NaN
3.916	9.403	12.9154	1023.981	-0.71533	1.022	-0.2749	5.374	171.494	567.8032	-0.8618	0.23037	0.013494	-45.435	8.886	80.257	0	0.22607	-0.16064	NaN	NaN	NaN	NaN	NaN	NaN
3.918	5.582	7.3125	1013.035	-0.6792	1.0132	-0.29004	-47.2984	208.504	500.435	-0.82173	0.22979	0.021497	-43.487	-15.804	123.026	-0.03418	0.2373	-0.17188	NaN	NaN	NaN	NaN	NaN	NaN
3.92	16.005	-5.683	982.7	-0.64551	1.0081	-0.29809	0.205000000000002	177.849	502.485	-0.77832	0.22754	0.027832	-61.066	-37.079	89.859	-0.062012	0.24268	-0.17725	NaN	NaN	NaN	NaN	NaN	NaN
3.922	37.218	-19.94	965.315	-0.61084	1.0044	-0.30664	22.15	200.799	488.8974	-0.73665	0.22706	0.037691	-51.324	-4.861	139.7	-0.12695	0.25	-0.18555	NaN	NaN	NaN	NaN	NaN	NaN
3.924	38.625	-50.601	968.559	-0.57324	0.99609	-0.3291	-25.442	173.145	477.125	-0.69262	0.22656	0.042076	-9.38	36.504	191.606	-0.18482	0.25684	-0.19239	NaN	NaN	NaN	NaN	NaN	NaN
3.926	34.418	-71.355	956.038	-0.5459	0.99023	-0.33301	28.78	144.7495	480.519	-0.65238	0.22383	0.051459	5.57700000000001	58.973	275.8748	-0.25195	0.27051	-0.19189	NaN	NaN	NaN	NaN	NaN	NaN
3.928	48.098	-91.4706	961.808	-0.50049	0.98486	-0.35352	12.026	171.513	427.757	-0.61028	0.22275	0.058492	23.364	41.088	337.0849	-0.36084	0.27979	-0.20605	NaN	NaN	NaN	NaN	NaN	NaN
3.93	58.017	-92.9041	953.057	-0.47827	0.97901	-0.36572	-3.608	126.487	417.722	-0.56787	0.22217	0.058594	-25.77	15.50284	390.8987	-0.42432	0.28418	-0.20215	NaN	NaN	NaN	NaN	NaN	NaN
3.932	47.929	-93.602	933.944	-0.45703	0.97656	-0.38281	57.0725	127.8533	391.858	-0.52675	0.21914	0.06924	-32.519	30.58	470.9922	-0.56494	0.29297	-0.20703	NaN	NaN	NaN	NaN	NaN	NaN
3.934	30.806	-105.3196	922.996	-0.43799	0.97754	-0.39941	4.561	144.262	328.4	-0.48113	0.21788	0.076759	-59.997	64.936	602.011	-0.6831	0.302	-0.20337	NaN	NaN	NaN	NaN	NaN	NaN
3.936	56.379	-119.2646	931.711	-0.43945	0.97266	-0.39941	9.903	116.8828	328.196	-0.43348	0.21943	0.084182	-33.3131	105.731	693.951	-0.81592	0.31104	-0.19385	NaN	NaN	NaN	NaN	NaN	NaN
3.938	68.895	-133.0527	939.961	-0.43652	0.97461	-0.41504	23.2061	139.865	305.629	-0.38427	0.2208	0.087501	-45.522	105.733	772.323	-1.0083	0.33105	-0.17188	NaN	NaN	NaN	NaN	NaN	NaN
3.94	66.347	-132.9792	944.598	-0.448	0.98071	-0.417	-2.022	116.33	290.071	-0.32568	0.22119	0.094727	-19.618	92.069	807.144	-1.1677	0.34545	-0.14892	NaN	NaN	NaN	NaN	NaN	NaN
3.942	48.36	-144.23529	950.241	-0.46582	0.98779	-0.42334	27.199	89.383	304.14	-0.27588	0.2206	0.095313	-31.0268	64.11108	907.186	-1.3398	0.36133	-0.11035	NaN	NaN	NaN	NaN	NaN	NaN
3.944	54.424	-138.442	959.892	-0.49951	0.99463	-0.42529	-7.594	126.202	261.322	-0.21944	0.2128	0.10108	0.5561	50.778	984.256	-1.5874	0.38721	-0.053711	NaN	NaN	NaN	NaN	NaN	NaN
3.946	51.319	-146.2222	964.567	-0.52344	0.99805	-0.43164	-4.781	99.481	249.873	-0.16163	0.2042	0.10498	-7.2595	20.6735	1094.695	-1.73	0.39746	-0.012695	NaN	NaN	NaN	NaN	NaN	NaN
3.948	31.05	-150.9414	963.286	-0.57227	1.0176	-0.42773	26.459	112.038	232.947	-0.10323	0.19932	0.10625	-9.383	-11.845	1117.429	-2.0059	0.44824	0.046387	NaN	NaN	NaN	NaN	NaN	NaN
3.95	51.614	-159.5923	949.415	-0.60913	1.0257	-0.42993	-37.5024	113.007	199.916	-0.04834	0.19141	0.11084	27.1495	-82.519	1133.583	-2.2168	0.49097	0.087402	NaN	NaN	NaN	NaN	NaN	NaN
3.952	50.579	-151.8498	959.596	-0.6543	1.043	-0.42773	-10.086	82.3655	196.2119	0.0081067	0.18584	0.1125	55.219	-144.596	1101.182	-2.3887	0.53809	0.093262	NaN	NaN	NaN	NaN	NaN	NaN
3.954	62.891	-148.937	969.934	-0.7124	1.0591	-0.41748	-9.777	90.8811	171.6889	0.061915	0.175	0.11348	9.646	-200.534	1091.092	-2.5483	0.62354	0.089355	NaN	NaN	NaN	NaN	NaN	NaN
3.956	27.757	-162.2211	977.92	-0.7417	1.0669	-0.41943	-54.02	76.162	157.375	0.1123	0.16289	0.12051	0.644999999999996	-200.687	1051.174	-2.5664	0.67188	0.077148	NaN	NaN	NaN	NaN	NaN	NaN
3.958	33.026	-177.9876	973.1577	-0.79053	1.0923	-0.41357	-0.983999999999995	56.2274	153.522	0.1581	0.15498	0.11436	-59.674	-170.399	1032.848	-2.4946	0.7749	0.05957	NaN	NaN	NaN	NaN	NaN	NaN
3.96	55.263	-193.9816	995.226	-0.82813	1.0991	-0.40967	-31.548	70.915	134.769	0.20117	0.14795	0.11035	-87.695	-108.28	1020.7272	-2.3701	0.854	0.039063	NaN	NaN	NaN	NaN	NaN	NaN
3.962	42.784	-183.9816	995.842	-0.8501	1.104	-0.3999	-45.378	28.855	130.469	0.23623	0.13691	0.11162	-135.245	-94.721	1014.269	-2.1968	0.91064	0.0048828	NaN	NaN	NaN	NaN	NaN	NaN
3.964	43.017	-172.2402	999.051	-0.87646	1.1108	-0.3999	25.794	33.416	131.67	0.26397	0.12529	0.1167	-96.336	-71.491	1006.684	-1.8926	0.90039	-0.030762	NaN	NaN	NaN	NaN	NaN	NaN
3.966	47.47	-159.7163	998.11	-0.88428	1.106	-0.3999	-22.366	35.416	108.046	0.29366	0.12373	0.11396	-126.568	-76.258	1043.316	-1.7183	0.86572	-0.056641	NaN	NaN	NaN	NaN	NaN	NaN
3.968	67.827	-157.6983	1020.224	-0.89844	1.1055	-0.39746	9.834	2.1485	119.112	0.31309	0.10859	0.11426	-124.066	-44.603	1033.214	-1.3999	0.77197	-0.14209	NaN	NaN	NaN	NaN	NaN	NaN
3.97	40.268	-152.734	1026.468	-0.90503	1.1008	-0.39575	10.899	42.4877	107.755	0.3252	0.10156	0.1123	-150.347	-59.897	1076.593	-1.1904	0.69043	-0.20386	NaN	NaN	NaN	NaN	NaN	NaN
3.972	41.193	-170.5709	1040.092	-0.91357	1.0942	-0.39941	-28.815	47.2	88.7192	0.33672	0.089551	0.1125	-121.653	-51.178	1074.385	-1.0068	0.61328	-0.24609	NaN	NaN	NaN	NaN	NaN	NaN
3.974	53.541	-183.751	1045.063	-0.92139	1.0825	-0.39307	39.474	32.5175	91.315	0.33359	0.076855	0.11846	-104.778	-118.931	1082.18	-0.82568	0.58057	-0.2417	NaN	NaN	NaN	NaN	NaN	NaN
3.976	64.621	-176.086	1039.592	-0.93164	1.0762	-0.39063	23.789	41.6449	64.014	0.33008	0.078418	0.11806	-29.725	-135.428	1087.857	-0.77148	0.61523	-0.25195	NaN	NaN	NaN	NaN	NaN	NaN
3.978	58.342	-149.1065	1036.476	-0.92822	1.0688	-0.39209	-9.138	-6.9716	55.306	0.325	0.068848	0.12041	-14.868	-207.323	1109.426	-0.82764	0.7251	-0.29785	NaN	NaN	NaN	NaN	NaN	NaN
3.98	54.926	-142.8912	1026.375	-0.93164	1.0576	-0.38721	44.1385	8.388	52.248	0.30811	0.062012	0.11963	-34.191	-185.252	1142.485	-0.90698	0.77563	-0.32495	NaN	NaN	NaN	NaN	NaN	NaN
3.982	70.338	-147.1382	1031.909	-0.93652	1.0527	-0.38867	21.9	33.971	26.6012	0.2917	0.053907	0.12481	-60.06	-277.6213	1225.585	-0.94727	0.80859	-0.33594	NaN	NaN	NaN	NaN	NaN	NaN
3.984	66.574	-150.3601	1031.1095	-0.9375	1.0342	-0.37891	39.895	9.6831	30.3192	0.26592	0.043262	0.12509	-51.7589	-274.5057	1271.3929	-1.0073	0.77393	-0.31201	NaN	NaN	NaN	NaN	NaN	NaN
3.986	66.536	-138.354	1031.546	-0.94238	1.0313	-0.37891	40.083	38.9046	19.101	0.23936	0.036621	0.12783	-26.479	-328.303	1339.506	-1.0801	0.77344	-0.31152	NaN	NaN	NaN	NaN	NaN	NaN
3.988	51.785	-129.4963	1034.999	-0.96436	1.0161	-0.37256	-4.354	27.66	16.999	0.204	0.032715	0.12832	20.153	-284.123	1427.229	-1.2676	0.76074	-0.25391	NaN	NaN	NaN	NaN	NaN	NaN
3.99	74.4747	-119.4715	1050.294	-0.9917	1.0044	-0.35986	58.0368	20.4651	32.5173	0.16846	0.029785	0.13623	29.256	-288.93	1476.659	-1.4478	0.78272	-0.21387	NaN	NaN	NaN	NaN	NaN	NaN
3.992	60.291	-115.7839	1031.6269	-1.0098	0.99805	-0.35986	38.64	44.922	19.7304	0.13906	0.02168	0.14668	15.074	-190.75	1500.872	-1.6284	0.81787	-0.18604	NaN	NaN	NaN	NaN	NaN	NaN
3.994	51.115	-116.8153	1022.4385	-1.0371	0.98633	-0.35352	30.333	3.8	43.544	0.1085	0.019824	0.14766	-3.369	-164.1137	1499.9376	-1.8276	0.87744	-0.16602	NaN	NaN	NaN	NaN	NaN	NaN
3.996	39.857	-126.9062	1008.1816	-1.0513	0.97753	-0.34668	40.6649	5.89948	41.011	0.078809	0.013575	0.14882	35.856	-66.088	1541.3316	-1.9102	0.89648	-0.15527	NaN	NaN	NaN	NaN	NaN	NaN
[truncated: 28,002 more rows]
