# Supplementary material for: Reliability and Validity of Running Cadence and Stance Time Derived from Instrumented Wireless Earbuds
Source: Sensors (Basel). 2021 Nov 30;21(23):7995. doi: 10.3390/s21237995 (PMC8659722; doi:10.3390/s21237995)
Supplement: Supplementary file 1 [file sensors-21-07995-s001.zip › Data_P12_HeadMovements.csv]

time	up_force_plate_1	up_force_plate_2	up_force_plate_3	up_earbuds_1	up_earbuds_2	up_earbuds_3	down_force_plate_1	down_force_plate_2	down_force_plate_3	down_earbuds_1	down_earbuds_2	down_earbuds_3	shake_force_plate_1	shake_force_plate_2	shake_force_plate_3	shake_earbuds_1	shake_earbuds_2	shake_earbuds_3	nod_force_plate_1	nod_force_plate_2	nod_force_plate_3	nod_earbuds_1	nod_earbuds_2	nod_earbuds_3	bird_L_force_plate_1	bird_L_force_plate_2	bird_L_force_plate_3	bird_L_earbuds_1	bird_L_earbuds_2	bird_L_earbuds_3	bird_R_force_plate_1	bird_R_force_plate_2	bird_R_force_plate_3	bird_R_earbuds_1	bird_R_earbuds_2	bird_R_earbuds_3	check_watch_force_plate_1	check_watch_force_plate_2	check_watch_force_plate_3	check_watch_earbuds_1	check_watch_earbuds_2	check_watch_earbuds_3
0	-40.802	55.667	10.3156	-0.013184	0.38086	-0.29053	-36.9	119.7449	246.542	0.042969	-0.12012	-0.25244	-41.749	71.414	57.4107	0.0037109	-0.07627	-0.18848	-55.354	74.8446	299.691	-0.14795	0.48291	-0.48926	24.808	124.9709	1081.602	-1.0762	0.40039	-1.3848	-54.398	127.39	1226.39461	-1.2432	0.98242	-1.2734	115.669	-34.6464	1521.235	-1.6489	0.58438	-1.6016
0.002	-74.746	43.5508	33.87	-0.031738	0.4043	-0.32568	-9.119	75.337	232.0737	0.063477	-0.11572	-0.25098	-74.4828	60.8735	48.0142	0.021484	-0.071777	-0.18799	-114.009	82.6454	426.326	-0.2876	0.43799	-0.59521	17.462	126.7315	1044.8843	-1.0601	0.40186	-1.3608	-54.217	146.308	1222.878	-1.2181	0.95429	-1.2416	135.239	-66.364	1570.6764	-1.6566	0.62217	-1.651
0.004	-40.138	35.833	41.367	-0.057861	0.42553	-0.35181	-27.197	124.829	211.4837	0.065918	-0.1123	-0.25342	-23.58	31.7376	57.33736	0.032812	-0.068457	-0.1833	-91.408	79.6658	607.265	-0.38525	0.41064	-0.65186	57.894	138.502	1041.2762	-1.0269	0.39307	-1.3179	-88.2946	197.34	1164.192	-1.2009	0.92444	-1.2084	114.806	-17.2142	1585.8395	-1.6333	0.62354	-1.7046
0.006	-68.8709	5.6378	37.569	-0.093262	0.4458	-0.37842	-44.5681	105.9939	190.878	0.07959	-0.104	-0.25732	-55.538	67.532	38.701	0.047656	-0.069238	-0.17432	-39.573	95.463	762.814	-0.65771	0.35498	-0.74365	8.8637	137.731	1009.4767	-0.99048	0.39258	-1.2805	-65.7299	148.035	1140.8096	-1.1895	0.89963	-1.1842	77.166	-44.557	1593.842	-1.61	0.60722	-1.7471
0.008	-52.494	-19.3388	88.5386	-0.14063	0.44775	-0.42139	-17.945	96.171	201.9206	0.090088	-0.089355	-0.25781	-60.69	26.7004	46.399	0.062891	-0.071973	-0.17002	-102.224	50.471	888.28	-0.9197	0.33227	-0.80347	16.238	127.678	1014.394	-0.95068	0.39063	-1.2427	-29.205	156.004	1116.4326	-1.1754	0.87237	-1.1484	70.78	-15.2692	1609.702	-1.6282	0.6043	-1.8008
0.01	-57.62	7.9033	106.244	-0.16504	0.45215	-0.44629	-66.8031	145.891	173.385	0.097168	-0.08252	-0.25781	-25.847	22.089	38.1901	0.077442	-0.071386	-0.16162	-76.319	38.4545	1024.286	-1.2148	0.32715	-0.86133	23.723	164.484	977.4319	-0.9043	0.39063	-1.2012	-29.642	173.0377	1063.063	-1.1597	0.84814	-1.1089	45.721	-10.253	1574.72	-1.6863	0.61953	-1.8699
0.012	-96.3839	6.0807	164.43	-0.24219	0.44141	-0.52148	-30.594	102.7697	171.24102	0.10352	-0.058594	-0.25146	-76.1403	52.422	20.773	0.09375	-0.074707	-0.15283	-72.885	33.367	1083.0643	-1.6211	0.37012	-0.93848	-23.74	169.192	918.9785	-0.87891	0.39453	-1.1777	-26.609	129.573	1063.3548	-1.14	0.82045	-1.0814	43.077	-73.6894	1596.668	-1.7639	0.64707	-1.9373
0.014	-64.536	32.0736	264.401	-0.33155	0.41845	-0.58374	-12.059	121.479	185.61	0.099609	-0.046875	-0.25098	-48.796	6.65786	35.0297	0.10596	-0.077832	-0.14619	-121.067	-28.86	1150.844	-1.8816	0.4397	-0.97828	11.681	169.968	893.9809	-0.8374	0.38721	-1.144	-34.876	171.4425	1014.2505	-1.1053	0.79538	-1.0535	54.313	-23.272	1596.9465	-1.8398	0.68457	-1.9844
0.016	-93.553	58.723	365.447	-0.4541	0.38232	-0.65186	-60.5501	122.1881	140.0377	0.091797	-0.018555	-0.25684	-38.713	35.051	22.3971	0.11523	-0.085156	-0.13301	-99.611	-18.277	1178.366	-2.0684	0.55371	-1.0156	-17.327	171.434	853.82	-0.80835	0.38599	-1.1062	-25.129	149.632	966.091	-1.0606	0.76429	-1.0205	34.4336	-24.507	1544.074	-1.8759	0.7419	-2.0177
0.018	-94.007	45.887	512.947	-0.68945	0.32422	-0.74414	-20.523	55.966	132.6324	0.088135	0.0029297	-0.25781	-61.9443	30.036524	16.7438	0.125	-0.089453	-0.12285	-100.8939	-44.3474	1168.662	-2.146	0.84814	-1.0269	-25.443	132.2878	850.485	-0.7749	0.37744	-1.062	-0.446999999999996	127.077	940.97021	-1.0153	0.73706	-0.98784	15.5571	-20.9631	1534.17253	-1.8616	0.79971	-2.0475
0.02	-33.277	64.029	676.091	-0.83301	0.28418	-0.78223	-41.282	111.899	106.9254	0.085938	0.024902	-0.25342	-12.187	-2.7873	33.8813	0.13486	-0.095801	-0.11172	-91.096	-61.7736	1236.136	-2.1147	1.0347	-1.0503	27.046	142.292	848.0306	-0.74219	0.37305	-1.0127	-22.613	167.76343	898.934	-0.9707	0.70703	-0.95508	30.6685	42.7072	1465.465	-1.8116	0.82002	-2.0632
0.022	-45.537	63.541	814.835	-1.1758	0.24023	-0.8418	-45.3753	87.5956	89.2559	0.078613	0.043457	-0.25244	-31.255	44.9725	10.46	0.13916	-0.10254	-0.099121	-81.211	-17.462	1259.52	-1.9644	1.3677	-1.144	-36.69	129.1131	811.3814	-0.72266	0.36963	-0.98242	-36.1	131.4425	899.2971	-0.92547	0.67647	-0.92288	0.149	-2.625	1421.6304	-1.7278	0.80342	-2.0669
0.024	-40.539	57.061	975.6154	-1.4773	0.23365	-0.88013	-4.981	55.85022	107.78	0.076172	0.054199	-0.25	-25.994	10.286	31.9272	0.14365	-0.10976	-0.086524	-109.4148	-76.944	1237.1675	-1.7439	1.4983	-1.2249	-31.053	105.764	782.33	-0.67969	0.35059	-0.92969	-40.462	183.053	874.182	-0.88576	0.64557	-0.89347	9.888	37.211	1431.3	-1.6401	0.76904	-2.0444
0.026	-46.215	62.491	1073.094	-1.7715	0.26563	-0.90039	-41.561	94.747	71.784	0.069824	0.072266	-0.24463	15.652	6.7156	44.874	0.14951	-0.1211	-0.078223	-78.09	-129.062	1226.424	-1.4448	1.5493	-1.2671	-45.943	144.4888	743.0319	-0.64478	0.34351	-0.88428	-70.7209	209.173	837.0737	-0.8379	0.61562	-0.86275	-2.9	83.628	1379.9017253	-1.5631	0.72822	-2.0046
0.028	-100.657	22.2361	1142.4814	-2.1128	0.40967	-0.92334	-35.087	30.588	67.55	0.061035	0.080322	-0.23926	-32.992	48.955	6.825	0.15537	-0.13164	-0.062988	-39.176	-139.5	1196.901	-1.0444	1.5239	-1.2319	-86.149	150.233	697.02671	-0.61426	0.33301	-0.83789	-40.6123	166.685	802.621	-0.80063	0.58443	-0.8326	-23.194	50.7334	1383.8629	-1.5038	0.68603	-1.9601
0.03	-30.881	2.664	1221.311	-2.2349	0.50732	-0.94092	-19.041	61.9267	70.102	0.056152	0.090332	-0.23486	-9.977	10.484	19.4407	0.16064	-0.14179	-0.054395	-39.084	-152.474	1240.234	-0.9209	1.4902	-1.1992	-49.551	155.239	702.303	-0.57422	0.31445	-0.7793	-24.231	190.376	760.076	-0.76074	0.55469	-0.80664	-2.95061	133.2	1349.839	-1.4577	0.63447	-1.9148
0.032	-34.881	-17.731	1211.856	-2.3398	0.76563	-0.99023	-56.9469	80.63674	72.1178	0.045898	0.092773	-0.21143	-23.082	38.864	7.5268	0.16357	-0.15186	-0.051758	-18.244	-82.141	1291.94	-0.85547	1.3652	-1.123	-81.49019	176.03747	671.0867	-0.55762	0.31152	-0.74805	-34.408	165.3072	705.8769	-0.7193	0.51706	-0.77217	-89.417	89.961	1282.014	-1.4206	0.57393	-1.871
0.034	-61.937	-71.846	1202.686	-2.2995	0.98363	-1.0403	-24.801	15.013	99.431	0.041992	0.099609	-0.21973	-64.6761	33.799	4.6964	0.16865	-0.16162	-0.047266	-94.361	-64.209	1258.54	-0.93311	1.2348	-1.0869	-96.151	149.31	635.2322	-0.52246	0.28857	-0.69043	-23.98	165.0565	689.9334	-0.67764	0.48255	-0.73761	-67.23763	73.9764	1307.317	-1.3882	0.51611	-1.8394
0.036	-9.063	-87.852	1191.812	-2.1772	1.1685	-1.1089	-31.053	66.642	63.6633	0.040039	0.09668	-0.21631	-19.689	-8.66139	36.551	0.17686	-0.16358	-0.038281	-107.6343	-123.073	1257.948	-1.0469	1.1074	-1.0566	-74.0878	165.618	612.68778	-0.49829	0.27563	-0.64282	-25.083	221.61	642.946	-0.63829	0.45188	-0.70851	-53.2698	102.469	1281.345	-1.3645	0.46572	-1.8173
0.038	-37.9438	-98.625	1180.177	-1.8589	1.3032	-1.1948	-58.272	29.9887	46.2737	0.044922	0.093994	-0.21192	-48.773	42.34	19.167	0.17529	-0.17178	-0.03164	-82.51547	-138.763	1247.443	-1.2148	0.96875	-1.002	-129.415	176.983	571.548	-0.47461	0.25781	-0.5957	-23.59	160.569	622.1504	-0.59499	0.41797	-0.67501	-60.005	43.6408	1256.67	-1.337	0.42744	-1.7843
0.04	-25.5462	-122.424	1204.138	-1.6504	1.3154	-1.2031	-25.683	15.1339	55.444	0.048828	0.091309	-0.20752	-25.783	21.74	24.2392	0.17451	-0.17813	-0.02832	-95.093	-214.074	1267.141	-1.2905	0.91748	-0.98975	-72.08	145.6985	551.7466	-0.43945	0.23242	-0.53809	-9.38	176.295	592.445	-0.55615	0.38525	-0.64307	-19.431	74.896	1253.8099	-1.3132	0.41846	-1.7659
0.042	13.053	-114.759	1186.794	-1.2402	1.2559	-1.1641	-50.84	72.653	38.3476	0.061035	0.075195	-0.20605	-4.373	17.6622	23.9059	0.17285	-0.18457	-0.023926	-65.184	-241.6028	1324.15	-1.4331	0.86377	-0.98584	-38.952	163.6703	519.614	-0.42188	0.2334	-0.50195	-15.383	175.6469	526.4379	-0.51399	0.35039	-0.60821	-23.765	75.632	1212.2457	-1.2995	0.42451	-1.7538
0.044	1.848	-161.402	1150.329	-1.0498	1.1538	-1.1108	-28.205	5.244	40.0777	0.070801	0.067871	-0.20313	-66.82888	65.921	-12.3054	0.16436	-0.19209	-0.017774	-78.5694	-234.406	1314.917	-1.5096	0.87378	-1.0252	-93.6134	138.66	480.056	-0.38721	0.21533	-0.43848	-21.526	129.387	508.6827	-0.4723	0.31404	-0.57689	-5.522	45.156	1212.841	-1.2729	0.44385	-1.7437
0.046	29.813	-183.886	1166.728	-0.97412	1.0298	-1.0601	-28.396	19.664	30.853	0.083984	0.055176	-0.19971	-28.511	20.5081	4.2473	0.15977	-0.19521	-0.01582	-85.4276	-310.848	1319.852	-1.5645	0.91016	-1.0762	-39.585	109.816	454.419	-0.35888	0.20215	-0.39721	-31.383	192.228	488.999	-0.43328	0.2832	-0.54258	33.9541	103.23	1218.7412	-1.24	0.46826	-1.7269
0.048	35.9865	-142.711	1180.78	-1.0366	0.84424	-0.99365	-61.04561	17.845	14.022	0.094483	0.044921	-0.19116	-13.104	53.092	8.0918	0.15703	-0.1917	-0.01582	-13.848	-316.882	1337.9558	-1.6108	0.9751	-1.1655	-54.2463	155.401	424.803	-0.32422	0.19238	-0.35156	-63.1738	161.791	464.4188	-0.39192	0.25124	-0.50825	18.263	89.579	1174.51398	-1.2054	0.48594	-1.7094
0.05	-29.2838	-137.068	1240.306	-1.0972	0.77588	-0.96045	-16.33	-44.758	29.3728	0.10352	0.035645	-0.1875	-48.205	49.8153	21.3049	0.14941	-0.18389	-0.016309	21.918	-321.862	1355.663	-1.6245	1.0122	-1.2124	-73.4287	134.3144	435.1631	-0.28125	0.17529	-0.30859	-42.173	146.315	479.129	-0.35107	0.22607	-0.47656	22.893	96.757	1148.3792	-1.1649	0.49922	-1.6797
0.052	-10.4629	-95.61	1282.261	-1.2319	0.65479	-0.8999	-24.993	31.2446	22.4754	0.11426	0.021973	-0.17627	-24.128	2.096	43.7238	0.14648	-0.17871	-0.018066	29.338	-370.025	1406.2219	-1.6582	1.0703	-1.2813	-6.496	152.553	429.1135	-0.2666	0.16602	-0.2793	-52.457	169.083	426.7099	-0.30805	0.19691	-0.44447	49.3744	140.68392	1098.8578	-1.1362	0.50381	-1.6478
0.054	-52.648	-118.51	1233.489	-1.325	0.58862	-0.89331	-33.555	20.9784	-0.69085	0.12354	0.013672	-0.16895	-49.4874	49.6371	27.498	0.14815	-0.17207	-0.023926	51.798	-319.206	1469.44893	-1.6853	1.094	-1.3172	-58.696	149.971	385.702	-0.22852	0.14551	-0.21973	-70.485	103.221	402.5743	-0.26722	0.16517	-0.4097	7.786	122.206	1071.32	-1.1196	0.50293	-1.6147
0.056	-62.67741	-225.946	1233.004	-1.4067	0.54932	-0.8999	-17.986	2.7062	21.541	0.12891	0.0048828	-0.15771	-59.6281	28.557	22.9494	0.15157	-0.16406	-0.028418	11.332	-311.382	1507.473	-1.7129	1.1074	-1.3379	-16.109	87.402	384.8659	-0.21363	0.12769	-0.18775	-29.378	131.1777	391.4272	-0.23401	0.13704	-0.37844	18.099	159.705	1082.234	-1.1136	0.49248	-1.5687
0.058	-9.817	-253.995	1245.747	-1.5015	0.54248	-0.95654	-46.1064	53.342	11.778	0.1377	-0.0051269	-0.15527	-20.623	20.6042	32.9972	0.15508	-0.15508	-0.026074	-27.85	-289.431	1566.949	-1.7495	1.1089	-1.353	-0.355	105.7031	368.472	-0.19141	0.10742	-0.14893	-32.107	136.0333	339.9887	-0.19484	0.11339	-0.35118	28.11	168.637	1044.914	-1.1109	0.48554	-1.5216
0.06	-45.32995	-315.333	1269.489	-1.5488	0.56055	-1	-23.66	0.0120000000000005	21.0223	0.15186	-0.01123	-0.1333	-78.6195	70.004	13.367	0.15713	-0.14873	-0.029981	-16.208	-203.258	1552.9644	-1.7651	1.1108	-1.3599	-13.977	95.844	353.4045	-0.16455	0.089355	-0.11377	-28.919	104.875	323.627	-0.15771	0.080078	-0.32373	-29.077	120.247	988.93578	-1.1059	0.47148	-1.476
0.062	7.927	-340.349	1339.9237	-1.6304	0.63525	-1.0864	-11.416	18.4966	27.444	0.1582	-0.029297	-0.12012	-43.613	12.2168	12.1222	0.15918	-0.14453	-0.03418	-34.549	-224.085	1522.4546	-1.7949	1.0938	-1.3857	31.441	72.8662	352.27	-0.14893	0.07959	-0.095703	-21.65	144.7082	283.8752	-0.12275	0.052531	-0.30478	1.711	176.529	950.524	-1.0845	0.46885	-1.4333
0.064	14.8693	-342.274	1317.3471	-1.6931	0.68506	-1.1345	-52.487	38.135	13.14	0.16553	-0.035156	-0.11865	-39.358	51.955	9.188	0.15938	-0.13721	-0.033008	-40.165	-197.806	1541.4003	-1.8203	1.085	-1.4077	1.95699999999999	115.512	301.9106	-0.11523	0.062012	-0.061523	-38.467	93.957	251.7729	-0.092178	0.019913	-0.28017	-31.255	168.8309	910.038	-1.0654	0.4668	-1.3984
0.066	25.24936	-402.755	1307.3956	-1.7539	0.74023	-1.1875	-19.106	-13.1978	21.3525	0.17676	-0.038574	-0.10938	-58.7651	57.816	10.794	0.16055	-0.13144	-0.038086	-68.327	-162.734	1547.168	-1.855	1.0903	-1.439	5.882	79.3883	253.5381	-0.091063	0.049561	-0.043213	-34.411	67.456	252.3276	-0.06562	-0.013289	-0.26884	-35.152	168.1254	910.7283	-1.0319	0.44541	-1.3686
0.068	73.088	-361.605	1364.042	-1.834	0.79883	-1.2402	-29.599	47.28	7.5735	0.18774	-0.04541	-0.093994	-18.689	12.41684	35.0636	0.15586	-0.12793	-0.043555	-70.568	-175.638	1590.888	-1.9175	1.1235	-1.4937	31.148	82.4434	239.2248	-0.066406	0.049805	-0.016602	-51.45	112.4457	212.0346	-0.046286	-0.042776	-0.2498	-14.98	201.434	862.2865	-0.98828	0.44384	-1.3335
0.07	50.4457	-304.647	1385.911	-1.8726	0.81885	-1.2563	-56.7583	25.6459	-22.5932	0.19873	-0.053223	-0.083984	-43.873	66.431	20.615	0.15673	-0.12227	-0.047168	-36.033	-76.851	1619.82	-1.9492	1.1523	-1.5234	-18.666	120.217	211.509	-0.030273	0.038574	0.003418	-51.19	82.654	204.1463	-0.029297	-0.071777	-0.23047	-69.478	141.2783	819.574	-0.95078	0.43799	-1.2944
0.072	29.046	-306.838	1501.7426	-1.9194	0.83643	-1.2866	-4.664	-2.0216	-1.7406	0.20264	-0.058594	-0.079102	-31.52	40.23	30.0314	0.15479	-0.11621	-0.052246	-57.323	-82.735	1612.414	-2.0029	1.209	-1.5801	0.728000000000002	84.8137	222.66893	-0.01123	0.033203	0.015625	-28.038	142.47	208.0598	-0.028027	-0.092968	-0.21347	-32.031	160.0145	816.7606	-0.90752	0.42959	-1.2575
0.074	31.321	-228.4759	1547.4602	-1.9394	0.84668	-1.3027	-23.699	67.106	-8.1674	0.20947	-0.066406	-0.072266	-19.314	32.4744	33.338	0.15215	-0.11025	-0.05957	-35.295	-116.234	1668.59473	-2.0264	1.2549	-1.6133	-12.814	115.86	212.712	0.01416	0.032715	0.031738	-55.0056	152.029	177.361	-0.02705	-0.11201	-0.20283	-44.148	171.236	769.528	-0.86328	0.41602	-1.2178
0.076	-28.2125	-239.7931	1551.527	-1.957	0.86133	-1.3242	-38.402	16.6549	6.38247	0.21826	-0.068359	-0.069824	-52.701	76.715	17.722	0.15118	-0.10488	-0.065722	-28.872	-61.158	1680.426	-2.0352	1.2969	-1.6445	-45.3627	102.8329	186.507	0.03833	0.035156	0.039307	-57.289	88.6094	171.0856	-0.034082	-0.12881	-0.19229	-92.2558	137.165	755.753	-0.82158	0.39678	-1.1716
0.078	-24.2625	-215.007	1586.445	-1.98	0.89307	-1.3433	-11.639	38.0337	19.0618	0.22559	-0.074219	-0.065186	-18.591	18.5597	43.759	0.15	-0.099024	-0.073535	-78.184	-98.367	1722.236	-2.0234	1.332	-1.6699	-12.838	59.3227	186.9744	0.062012	0.035645	0.047363	-37.336	126.761	137.725	-0.036133	-0.14267	-0.18652	-87.012	170.653	740.8254	-0.78047	0.38066	-1.1275
0.08	-8.49	-133.637	1530.531	-2.002	0.9209	-1.3594	-33.424	53.9429	3.895	0.22656	-0.074707	-0.065918	-17.873	52.013	27.7581	0.15547	-0.089356	-0.08584	-101.756	-60.339	1776.038	-2.0112	1.3423	-1.6694	-56.232	128.031	158.013	0.083984	0.03418	0.062988	-48.078	83.44285	121.4597	-0.032715	-0.15381	-0.18262	-129.468	157.796	681.687	-0.74062	0.36348	-1.081
0.082	-42.637	-150.903	1517.262	-2.064	0.97705	-1.3979	-23.352	-8.364	20.6705	0.24463	-0.083496	-0.055176	-52.037	52.508	18.0118	0.16211	-0.083008	-0.094238	-118.923	-46.1367	1755.337	-1.9839	1.3599	-1.6655	-68.549	103.501	152.049	0.089844	0.036621	0.06543	-43.201	97.2855	122.9299	-0.030566	-0.15312	-0.1834	-104.1452	140.822	674.35562	-0.70713	0.34736	-1.0286
0.084	-26.673	-99.179	1559.566	-2.1035	1.0215	-1.4151	-21.105	62.044	18.6641	0.24219	-0.085938	-0.056152	-13.652	0.9495	28.5082	0.17168	-0.069336	-0.11289	-156.889	-113.577	1772.021	-1.9629	1.3574	-1.6396	-39.612	115.722	154.7747	0.11377	0.041504	0.070801	-24.411	137.023	84.503	-0.026563	-0.15518	-0.18496	-66.5806	175.16	632.2745	-0.67188	0.3291	-0.97852
0.086	-28.161	-96.728	1557.883	-2.1401	1.061	-1.4233	-5.759	49.6498	15.5846	0.24365	-0.089844	-0.06543	-23.494	51.889	21.202	0.18291	-0.059961	-0.13125	-143.62789	-71.123	1775.74	-1.937	1.3364	-1.6089	-94.1262	132.417	123.2789	0.12036	0.044677	0.072265	-47.6	75.4644	74.318	-0.028125	-0.14619	-0.18731	-102.4109	158.118	580.0108	-0.64522	0.31406	-0.92861
0.088	-16.3825	-172.7311	1596.4415	-2.1792	1.1001	-1.4321	-15.932	27.672	27.8815	0.23926	-0.086914	-0.075684	-48.716	15.7814	32.031	0.1958	-0.050586	-0.14414	-174.553	-87.9834	1703.8682	-1.9038	1.3032	-1.5503	-56.4037	53.7063	125.2533	0.12988	0.047852	0.076172	-48.92	91.1168	84.873	-0.034082	-0.13223	-0.19238	-73.892	176.908	583.93367	-0.62022	0.29727	-0.87256
0.09	35.393	-164.632	1606.286	-2.1929	1.106	-1.4272	-54.2945	79.553	4.702	0.23535	-0.084961	-0.072266	-2.863	1.4843	61.977	0.20489	-0.046387	-0.16045	-149.5258	-87.0624	1695.0769	-1.8862	1.2808	-1.5269	-61.0968	72.81015	108.675	0.13135	0.056641	0.083496	-44.896	87.7884	75.747	-0.032715	-0.11865	-0.19775	-93.8859	188.563	539.272	-0.59561	0.28672	-0.82217
0.092	7.257	-217.734	1622.4548	-2.2109	1.1201	-1.4199	-39.287	20.3918	10.089009	0.2251	-0.075195	-0.082031	-49.573	44.883	32.47132	0.20801	-0.041016	-0.17236	-121.9297	-1.185	1647.282	-1.8481	1.2349	-1.4878	-105.508	62.432	80.361	0.13672	0.059082	0.080566	-48.339	54.762	98.0956	-0.039746	-0.1042	-0.1958	-95.7924	150.084	525.3574	-0.57412	0.27217	-0.76982
0.094	9.344	-208.332	1678.894	-2.2012	1.1211	-1.4072	-30.35	37.5284	30.9983	0.21704	-0.061523	-0.092285	-20.864	-1.1949	35.34	0.20488	-0.039551	-0.18672	-123.60325	-59.1661	1632.06345	-1.8171	1.2219	-1.4519	-59.82	33.74	97.4144	0.14209	0.070801	0.089355	-34.906	106.148	96.1947	-0.041015	-0.088769	-0.19444	-26.084	163.327	501.53	-0.5542	0.26025	-0.71338
0.096	13.963	-125.424	1664.127	-2.1753	1.1177	-1.3901	-27.264	70.0505	15.4863	0.21094	-0.050293	-0.096191	-12.492	45.809	30.2347	0.19619	-0.038379	-0.19707	-84.347	-40.591	1616.6912	-1.7788	1.2124	-1.4214	-81.1419	101.9677	78.6134	0.15161	0.077149	0.087402	-62.126	73.268	62.1883	-0.045703	-0.074707	-0.19756	-65.3433	146.499	443.233	-0.52539	0.24463	-0.66054
0.098	-43.46309	-145.356	1667.237	-2.1172	1.0996	-1.3574	-18.811	13.1246	34.9449	0.20117	-0.033203	-0.10938	-66.0818	49.9653	13.93355	0.17978	-0.03877	-0.20918	-88.1341	-23.8491	1563.461	-1.7188	1.2129	-1.3965	-87.2714	65.6391	72.5603	0.1665	0.083008	0.092773	-73.31	68.623	72.9619	-0.044434	-0.055566	-0.196	-37.105	152.8103	442.8221	-0.49814	0.22832	-0.60771
0.1	-51.8577	-101.697	1683.227	-2.0605	1.0762	-1.3354	-33.675	60.624	27.776	0.19629	-0.021484	-0.11084	-9.611	10.8379	36.8177	0.16104	-0.040332	-0.22764	-68.301	-45.2014	1544.0584	-1.6812	1.2153	-1.3862	-43.845	65.308	85.965	0.17578	0.084473	0.094238	-47.689	89.989	48.695	-0.040039	-0.041992	-0.19385	9.854	202.059	413.901	-0.46845	0.21386	-0.55303
0.102	-42.3039	-103.062	1678.44	-2.0078	1.0566	-1.3145	-35.9033	39.55246	17.949	0.19092	-0.00097656	-0.11523	-31.854	47.795	39.332	0.13867	-0.034668	-0.24316	-43.623	45.7645	1515.848	-1.6094	1.2031	-1.3535	-52.505	103.862	63.5775	0.17969	0.085449	0.095703	-45.698	26.6363	51.2136	-0.029492	-0.027051	-0.19258	-35.428	173.937	397.6306	-0.43584	0.20527	-0.49971
0.104	-63.6731	-142.466	1705.737	-1.9395	1.0322	-1.2891	-21.682	6.6979	44.124	0.19068	0.013672	-0.12451	-45.828	-11.45659	66.8605	0.12139	-0.029883	-0.26347	-61.896	58.51	1475.478	-1.559	1.184	-1.3335	-21.979	60.22074	86.346	0.18213	0.085938	0.09668	-40.106	51.2975	62.7556	-0.019531	-0.016699	-0.18965	-3.471	167.246	372.606	-0.40088	0.19482	-0.44971
0.106	-13.246	-61.999	1682.242	-1.9102	1.0254	-1.2813	-48.121	65.576	39.541	0.1875	0.02832	-0.12744	-34.789	-47.6859	94.96683	0.098636	-0.022657	-0.28886	-54.181	57.337	1483.059	-1.5137	1.1563	-1.3086	-39.921	99.232	72.2079	0.18774	0.08081	0.097168	-50.6847	48.9205	30.436	-0.0078125	-0.0092773	-0.18613	-16.531	143.786	352.7053	-0.36523	0.18614	-0.40371
0.108	-45.585	-57.004	1609.0764	-1.8608	1.0161	-1.2515	-34.938	12.6465	29.2314	0.18896	0.031738	-0.14063	-55.813	-1.6218	93.887	0.07793	-0.014062	-0.32012	-38.396	96.354	1464.799	-1.4668	1.1113	-1.2734	-56.794	101.2833	42.2272	0.18848	0.077637	0.093262	-64.6633	15.31	48.1638	0.0030273	-0.0057617	-0.17725	-9.637	102.762	359.1119	-0.33467	0.16953	-0.36035
0.11	-28.75	-29.99222	1589.545	-1.8243	1.0161	-1.2451	-12.796	34.5483	40.7089	0.18945	0.037109	-0.13672	-22.882	-40.0215	113.8893	0.046875	-0.0020508	-0.33906	-52.411	13.291	1445.816	-1.4453	1.0898	-1.2578	-6.178	40.3578	47.7532142	0.18213	0.072266	0.089844	-28.137	84.139	35.472	0.018066	-0.003418	-0.1626	30.751	123.2104	356.2956	-0.29795	0.15468	-0.31699
0.112	-6.802	20.6286	1544.154	-1.793	1.0137	-1.2324	-51.0172	66.867	9.651	0.18115	0.041504	-0.1377	-11.041	0.427000000000003	145.556	0.0024414	0.0063477	-0.35889	-47.118	12.632	1436.05469	-1.418	1.0469	-1.2266	-18.641	78.7383	29.927	0.17773	0.066895	0.084961	-45.987	52.554	13.3883	0.033886	-0.0015625	-0.15576	-13.723	110.9062	345.4405	-0.26885	0.14229	-0.27568
0.114	-45.907	-29.206	1518.5504	-1.7476	1.0103	-1.2183	-22.703	7.7335	34.9164	0.17237	0.038574	-0.14062	-54.068	15.7092	196.077	-0.060937	0.019336	-0.38574	-16.151	24.85462	1398.3911	-1.394	1.0063	-1.2104	-7.476	26.388	37.9455	0.17627	0.060059	0.080566	-39.615	42.18	26.2907	0.044434	-0.0035156	-0.14521	1.266	83.1185	315.367	-0.23877	0.12598	-0.23877
0.116	12.014	-2.0591	1541.9907	-1.7241	1.0083	-1.1987	-24.352	52.5288	36.1734	0.15967	0.038574	-0.14404	-0.18	-29.128	316.534	-0.13593	0.031445	-0.41563	-39.379	-15.5306	1362.1319	-1.3672	0.97461	-1.1904	9.481	21.2205	47.7889	0.16967	0.054443	0.066162	-23.167	69.112	17.61946	0.058887	-0.0125	-0.1288	26.465	110.829	268.8542	-0.20723	0.10849	-0.2042
0.118	-0.762	6.95393	1495.738	-1.6733	0.99463	-1.1812	-40.995	19.72	27.8467	0.14209	0.025391	-0.14795	-14.1655	65.1245	450.709	-0.21406	0.029101	-0.43984	-21.014	51.73264	1340.905	-1.3276	0.93506	-1.1665	-24.578	76.498	19.5259	0.16309	0.055664	0.059082	-60.3422	2.49668	35.9732	0.065332	-0.019434	-0.11943	-29.761	81.9982	247.2929	-0.17666	0.092285	-0.16748
0.12	-31.253	-13.3892	1493.923	-1.6331	0.97974	-1.1638	-17.917	-17.73624	48.4795	0.13135	0.02832	-0.15186	-1.353	43.598	587.082	-0.30781	0.020703	-0.47734	-37.907	27.939	1305.253	-1.3066	0.91211	-1.1533	-4.428	24.32871	39.7323	0.1543	0.065918	0.055664	-32.191	31.8965	59.9354	0.072266	-0.029785	-0.10596	-8.615	85.3493	242.93	-0.14854	0.080567	-0.13662
0.122	-6.136	40.391	1472.554	-1.5913	0.96533	-1.1421	-40.995	47.7084	30.695	0.11768	0.027832	-0.16162	32.447	30.116	732.238	-0.42041	0.019531	-0.52148	-4.218	14.346	1303.5028	-1.2651	0.87549	-1.1265	10.805	45.998	36.4352	0.15186	0.069336	0.05127	-38.28	31.1677	56.1158	0.08291	-0.033301	-0.096583	-22.261	104.045	232.422	-0.11933	0.068066	-0.10928
0.124	-33.007	3.932	1429.16	-1.5352	0.93555	-1.1211	-25.464	1.2744	33.9068	0.10473	0.03125	-0.16871	-3.499	74.7062	824.782	-0.5707	0.00087888	-0.57129	25.109	82.96	1289.9643	-1.2363	0.85009	-1.1059	-19.356	31.7681	37.0727	0.13672	0.085449	0.041016	-39.962	-3.7392	49.022	0.09375	-0.041407	-0.082031	-64.33	75.9528	209.7792	-0.08252	0.065918	-0.083008
0.126	-16.083	-17.2304	1440.001	-1.5117	0.92383	-1.1094	-5.766	25.649	32.3335	0.096191	0.036621	-0.17969	30.37312	41.45381	947.542	-0.75693	-0.01875	-0.621	-29.142	56.268	1252.613	-1.2104	0.82275	-1.0796	17.415	-26.9771	49.7674	0.13232	0.094483	0.041259	-5.121	48.7802	28.739	0.10078	-0.055859	-0.071875	-27.595	83.5225	203.847	-0.049805	0.052832	-0.058887
0.128	11.261	-7.973	1429.285	-1.4683	0.89014	-1.0815	-30.224	49.267	14.2194	0.085938	0.044922	-0.19141	56.797	79.991	1049.6094	-0.98232	-0.031641	-0.65576	-20.785	119.8963	1234.161	-1.1777	0.7832	-1.0508	-16.019	36.4986	27.179	0.13428	0.1084	0.039551	-50.2504	28.9298	0.306999999999999	0.11328	-0.063867	-0.059375	-59.8725	89.3919	181.395	-0.018457	0.049121	-0.034765
0.13	-33.3512	-38.93	1406.083	-1.4387	0.86792	-1.0632	-36.1567	-10.1839	25.0709	0.078613	0.04541	-0.20215	16.0194	70.585	1109.52	-1.2634	-0.027051	-0.70322	-49.787	158.952	1186.0996	-1.1558	0.76416	-1.0308	-37.241	5.236	32.464	0.13525	0.12793	0.038086	-32.087	18.1088	19.0197	0.12842	-0.075684	-0.056641	-68.7633	81.7126	184.313	0.013184	0.043262	-0.014844
0.132	17.2705	-5.1999	1402.824	-1.4116	0.854	-1.0464	-18.467	27.132	19.783	0.068359	0.056641	-0.22217	27.7704	-13.575	1151.607	-1.5776	-0.0092773	-0.75928	-81.061	149.983	1160.45	-1.1245	0.72705	-0.98779	-22.42	8.2747	38.735	0.14502	0.13672	0.035889	-13.47	43.437	21.0124	0.14785	-0.089648	-0.046191	-63.347	113.288	143.52474	0.046094	0.044824	0.0016601
0.134	7.949	25.9337	1327.659	-1.3804	0.82861	-1.0288	-28.203	9.408	12.876	0.062744	0.067383	-0.23169	12.13	-9.056	1144.711	-1.89	0.045313	-0.82793	-34.357	203.357	1110.0428	-1.092	0.69873	-0.96167	-59.791	59.512	4.3847	0.15625	0.15186	0.040039	-44.106	-8.1362	31.902	0.16553	-0.10195	-0.035449	-127.637	95.29	110.4748	0.071289	0.036621	0.020996
0.136	-6.864	1.648	1295.913	-1.3691	0.81641	-1.0195	-14.581	-19.6623	28.3249	0.058594	0.078613	-0.24658	4.367	-60.485	1144.454	-2.1774	0.13437	-0.9043	-83.0547	172.555	1064.991	-1.0625	0.67578	-0.93555	-31.18	12.8648	9.1894	0.17236	0.15771	0.046875	-19.778	16.0011	50.355	0.18077	-0.11445	-0.027637	-58.674	89.9035	117.7408	0.098142	0.035254	0.025488
0.138	31.497	44.091	1283.101	-1.3452	0.7915	-1.0034	-25.153	45.4324	16.465	0.04541	0.084473	-0.25732	-3.674	-78.731	1144.001	-2.3946	0.28321	-1.0027	-97.966	149.8667	1053.14	-1.0176	0.63672	-0.8877	-41.299	44.973	9.176	0.18457	0.15625	0.052734	-10.07	26.958	13.737	0.19043	-0.12569	-0.02207	-68.3598	100.203	101.659	0.13037	0.036524	0.039649
0.14	-12.993	31.682	1248.091	-1.3291	0.77393	-0.98584	-20.272	-6.6944	20.8748	0.033203	0.087402	-0.27148	-23.238	-69.418	1135.1989	-2.5006	0.49883	-1.0909	-68.96583	178.159	1006.624	-0.99268	0.62354	-0.87158	-76.7737	48.9921	11.304	0.20215	0.15967	0.066406	-46.922	1.504	40.0194	0.19971	-0.14258	-0.014648	-99.743	51.348	92.679	0.15381	0.036524	0.043554
0.142	10.003	44.042	1241.127	-1.3022	0.75244	-0.96631	-27.492	21.2041	32.6607	0.0058594	0.075195	-0.28906	11.637	-105.879	1134.2293	-2.4937	0.78955	-1.1421	-114.815	139.652	964.748	-0.93896	0.59229	-0.82959	-47.1001	-0.939	35.598	0.21485	0.15332	0.072266	-34.168	60.777	34.4062	0.20713	-0.15478	-0.0069336	-36.437	49.068	76.351	0.17617	0.03418	0.049902
0.144	13.8248	105.868	1214.17638	-1.2695	0.7168	-0.94629	-41.2275	59.783	0.988	-0.028809	0.068848	-0.30615	8.235	-66.882	1151.982	-2.4411	1.139	-1.22	-56.683	150.173	932.6921	-0.89282	0.5686	-0.79956	-80.63079	53.4723	19.697	0.22314	0.14453	0.080566	-49.0019	46.347	15.15281	0.20821	-0.16132	-0.0045898	-91.7884	60.198	66.151	0.19043	0.033691	0.050293
0.146	-39.1984	96.042	1187.0133	-1.2539	0.69922	-0.9375	-11.317	-17.51445	30.0417	-0.075684	0.056152	-0.31885	-33.596	-57.673	1163.281	-2.3336	1.3887	-1.3578	-48.042	153.1569	867.509	-0.84717	0.54346	-0.76855	-86.5972	12.765	13.5554	0.22754	0.12646	0.086914	-40.565	29.26756	30.6062	0.20898	-0.1664	-0.0014648	-72.9367	47.564	87.1693	0.21181	0.037891	0.05166
0.148	4.84	142.649	1161.535	-1.2168	0.66406	-0.91406	-22.227	20.2273	54.863	-0.16699	0.037109	-0.35156	1.22	-104.699	1186.5478	-2.0574	1.4586	-1.4746	-75.6663	119.644	836.3849	-0.79102	0.51123	-0.72656	-46.073	-7.8947	25.9805	0.22852	0.11768	0.09375	-28.363	51.042	4.8973	0.20801	-0.16934	0.00097655	-29.465	81.198	64.2175	0.22168	0.036524	0.05498
0.15	-29.207	163.854	1099.253	-1.1878	0.63989	-0.89429	-49.498	0.4324	73.821	-0.22363	0.021973	-0.37695	-6.521	-64.661	1198.6556	-1.5754	1.3643	-1.4739	-32.546	162.394	815.4124	-0.76758	0.49609	-0.71289	-79.8594	55.046	3.777	0.22852	0.10303	0.099609	-48.853	-7.0412	-0.583	0.21777	-0.16846	0.0014648	-58.7374	75.445	45.3732193	0.23301	0.044726	0.057715
0.152	-25.611	120.473	1064.924	-1.1563	0.60742	-0.875	-19.091	-26.115	122.714	-0.34668	-0.022461	-0.42041	-51.398	-58.329	1237.422	-1.064	1.1665	-1.3989	-72.8283	168.1187	797.8486	-0.72314	0.46143	-0.67139	-54.634	10.6884	4.953	0.22998	0.093995	0.10131	-29.53	20.2044	17.3659	0.21885	-0.16641	0.0018555	-15.757	62.127	71.945	0.23691	0.04834	0.060351
0.154	20.6172	149.036	1046.591	-1.1162	0.5752	-0.8418	1.577	34.4367	133.941	-0.46582	-0.05249	-0.47168	-25.549	-37.29	1264.406	-0.7333	0.92929	-1.3326	-54.8253	163.1045	814.742	-0.69385	0.43408	-0.64502	-58.6474	40.904	15.312	0.22607	0.092773	0.10059	-30.294	36.8335	0.573999999999998	0.21963	-0.16279	-0.0026367	-37.774	68.366	50.563	0.23828	0.050781	0.063965
0.156	-32.4941	114.59	1026.918	-1.0952	0.55908	-0.8291	-11.6538	-3.7106	198.969	-0.61377	-0.082031	-0.52197	-79.9407	-11.27	1263.778	-0.59024	0.70508	-1.3058	-8.85	184.184	749.3383	-0.66797	0.4043	-0.61914	-71.599	52.1983	13.5714	0.22168	0.086914	0.097656	-46.157	3.732	23.9331	0.22393	-0.15577	-0.0096679	-43.226	42.596	76.1643	0.23291	0.054492	0.058691
0.158	3.9852	104.2391	1021.967	-1.0537	0.52051	-0.80078	19.0657	41.38	355.793	-0.88135	-0.12061	-0.59229	-81.1606	-95.392	1256.557	-0.55117	0.52773	-1.2981	-39.628	146.6474	704.5918	-0.62842	0.37354	-0.57959	-19.275	-18.7987	39.8885	0.21777	0.089844	0.09082	-24.244	44.8615	37.1195	0.23262	-0.14492	-0.013086	20.204	48.9561	53.8288	0.22764	0.057226	0.059472
0.16	21.0837	125.8677	969.4394	-1.0122	0.49731	-0.77588	8.5756	90.861	495.113	-1.0352	-0.12646	-0.62988	-76.02878	-172.069	1234.729	-0.53828	0.39687	-1.2791	-2.246	164.3363	660.3094	-0.60132	0.34888	-0.55542	-38.176	35.5248	13.593	0.20752	0.097656	0.077637	-55.0918	22.1825	5.892	0.2334	-0.13574	-0.015137	-16.687	56.2192	7.602	0.21865	0.05957	0.055567
0.162	-13.114	111.895	896.9966	-0.97607	0.47803	-0.75537	4.427	57.094	646.028	-1.3745	-0.13281	-0.73779	-103.117	-242.985	1231.14	-0.53369	0.30127	-1.2632	-27.961	185.727	609.575	-0.56104	0.33008	-0.52148	-19.481	5.7	7.68	0.20019	0.10352	0.061523	-41.127	24.7275	31.2419	0.23994	-0.12949	-0.024512	-0.457000000000001	38.9517	24.7297	0.20117	0.061328	0.054785
0.164	19.738	134.022	858.536	-0.91797	0.44043	-0.71973	53.554	73.747	792.218	-1.6404	-0.10815	-0.82105	-26.21	-291.493	1272.773	-0.55547	0.25684	-1.2592	-12.794	160.4209	581.632	-0.50537	0.30762	-0.49902	0.609000000000002	16.7669	21.8362	0.18457	0.11328	0.043945	-29.919	65.844	23.0677	0.24326	-0.11983	-0.035156	22.994	61.158	22.0509	0.18652	0.05957	0.049805
0.166	6.918	174.7438	821.511	-0.88281	0.4209	-0.70508	2.7791	46.564	910.231	-1.9219	-0.049805	-0.9082	-40.941	-240.155	1293.44122	-0.58858	0.24756	-1.2855	29.779	174.891	541.1461	-0.4751	0.2915	-0.48584	-28.631	90.14	11.212	0.16748	0.1416	0.020996	-58.731	28.3073	13.5938	0.24599	-0.11201	-0.040235	-12.846	56.21	18.2201	0.16816	0.062011	0.056153
0.168	-23.976	157.866	809.5049	-0.81836	0.38574	-0.6748	44.981	-8.23535	1060.3754	-2.2871	0.12354	-1.0161	-63.6758	-258.726	1293.9468	-0.6249	0.28076	-1.3241	1.947	151.745	488.907	-0.41553	0.26758	-0.45703	-4.913	30.669	24.8216	0.15576	0.14795	0.003418	-33.635	44.3273	31.7152	0.24531	-0.10684	-0.045312	20.293	47.049	29.968	0.15	0.065821	0.055859
0.17	37.635	175.467	815.0071	-0.76709	0.36401	-0.65161	36.01	36.4043	1120.755	-2.4448	0.25244	-1.0698	-2.492	-272.639	1313.746	-0.65899	0.34219	-1.3597	14.443	138.09	476.404	-0.36719	0.24389	-0.44018	-7.913	55.731	21.6376	0.13135	0.17773	-0.022949	-40.444	48.434	-7.48	0.24023	-0.10352	-0.049805	-22.847	63.12	6.6302	0.12461	0.067383	0.048047
0.172	-10.9883	162.572	785.4027	-0.72119	0.33643	-0.63037	7.23092	-20.114	1157.0149	-2.6519	0.62744	-1.1577	-0.369000000000003	-241.169	1324.143	-0.70508	0.41113	-1.3887	35.261	168.1569	452.498	-0.32617	0.2168	-0.41748	-13.327	56.495	3.4911	0.11231	0.20288	-0.041992	-53.0808	13.9197	6.333	0.23662	-0.098438	-0.052735	-37.255	29.6359	41.62391	0.11123	0.074219	0.048535
0.174	-4.6963	139.565	764.579	-0.65479	0.2915	-0.59619	28.3045	-25.273	1201.735	-2.7104	1.023	-1.2163	6.536	-237.86	1385.6018	-0.77901	0.45908	-1.413	-13.351	162.438579	426.1123	-0.26807	0.18604	-0.39307	12.124	7.99512	24.5611	0.094238	0.22656	-0.063477	-18.866	58.1853	36.0205	0.22568	-0.093653	-0.057812	22.839	38.79696	48.994	0.098145	0.086426	0.040039
0.176	23.7	175.723	716.2401	-0.62891	0.26563	-0.58203	22.5574	-9.113	1208.37	-2.7227	1.4121	-1.3145	11.625	-177.3279	1454.443	-0.89834	0.49795	-1.436	15.699	161.109	410.0054	-0.24219	0.16846	-0.38281	-1.767	70.471	19.296	0.081543	0.25146	-0.095703	-35.698	48.5628	15.3895	0.21631	-0.094825	-0.058203	-57.127	53.3071	23.54	0.085644	0.090723	0.033496
0.178	-25.319	179.334	656.2051	-0.57227	0.22754	-0.54883	16.45	-62.578	1240.424	-2.5508	1.7422	-1.5586	-31.2971	-138.052	1451.016	-1.0526	0.52568	-1.456	-9.509	170.215	388.1296	-0.18652	0.13281	-0.35938	-23.72	45.5695	18.74887	0.072754	0.26416	-0.12451	-27.655	41.2316	26.0529	0.20722	-0.094043	-0.061621	-44.56	31.9138	32.2022	0.078711	0.10108	0.029199
0.18	14.669	189.634	643.1903	-0.52686	0.19824	-0.52856	-11.927	-20.35	1267.711	-2.3203	1.7871	-1.6523	-3.598	-133.287	1452.355	-1.2246	0.55234	-1.4816	-49.1076	139.583	373.37317	-0.15332	0.10742	-0.34082	-8.513	14.0881	24.9596	0.057129	0.27734	-0.17236	-26.345	80.244	12.727	0.19727	-0.092285	-0.064453	-30.957	39.762	31.0729	0.070117	0.10616	0.029199
0.182	16.831	197.596	595.79	-0.48438	0.16846	-0.50879	-13.812	-34.333	1294.9942	-1.6167	1.7007	-1.6421	17.7867	-69.292	1449.03	-1.3672	0.58301	-1.5059	-9.343	150.332	348.2045	-0.11963	0.081543	-0.32764	-18.475	43.078	39.3103	0.028564	0.29078	-0.21045	-45.149	41.462	17.7496	0.19063	-0.088672	-0.069629	-77.5014	40.652	22.485	0.065625	0.11543	0.026367
0.184	-7.219	139.358	576.6322	-0.42871	0.13574	-0.479	1.606	-89.5187	1340.7204	-1.1133	1.4893	-1.5371	4.0029	-85.932	1439.3576	-1.4633	0.61445	-1.5391	-70.56381	131.888	325.851	-0.074707	0.050293	-0.30469	-29.494	-18.6832	62.0313	-0.0083008	0.30029	-0.24756	-10.636	49.261	49.361	0.18506	-0.085254	-0.07373	-35.247	30.30507	43.099	0.060547	0.12402	0.032227
0.186	43.1976	133.531	556.02015	-0.40039	0.125	-0.46484	12.913	-56.3853	1328.7446	-0.76172	1.2129	-1.4531	78.221	-97.587	1460.4512	-1.5273	0.65	-1.5715	-58.285	102.5231	324.27	-0.055176	0.028809	-0.29297	-15.23	-2.066	86.921	-0.075195	0.31934	-0.30664	-28.91	52.681	28.736	0.18154	-0.082911	-0.078809	-79.2123	44.868	24.387	0.066309	0.13379	0.034668
0.188	-6.552	139.257	515.6433	-0.34668	0.095703	-0.43799	12.526	-86.139	1311.305	-0.57422	0.84375	-1.3848	25.41649	-87.934	1445.688	-1.5711	0.68203	-1.6199	-37.263	102.9539	288.23227	-0.023438	0.012207	-0.2749	-41.853	19.001	85.1916	-0.11084	0.3208	-0.33105	-62.8121	-2.268	48.498	0.17832	-0.080664	-0.081543	-86.3005	31.092	24.7463	0.070801	0.13916	0.04209
0.19	13.659	136.476	503.707	-0.29932	0.077393	-0.41968	-26.931	-36.259	1363.259	-0.54248	0.71729	-1.3608	41.1887	-126.953	1475.767	-1.6006	0.70918	-1.6701	-97.4208	86.089	247.3076	-0.0026856	-0.0070801	-0.2644	-76.909	-28.22	146.7774	-0.19092	0.33643	-0.38428	-13.271	43.962	44.69469	0.18262	-0.075684	-0.084473	-54.791	31.2162	39.357	0.08252	0.14267	0.049512
0.192	-0.590999999999994	163.982	479.0405	-0.25244	0.05957	-0.41016	-88.722	50.097	1385.7788	-0.53857	0.56494	-1.3374	92.118	-114.522	1501.67059	-1.6367	0.73828	-1.7324	-59.3075	70.017	235.2345	0.016602	-0.023926	-0.25537	-89.856	33.0376	198.366	-0.2649	0.34741	-0.43677	-41.806	24.1475	26.452	0.18301	-0.075391	-0.090918	-94.1801	49.6856	13.04	0.097753	0.14805	0.057519
0.194	-42.30605	155.917077	451.806	-0.19678	0.040527	-0.38623	-82.681	45.255	1414.042	-0.55884	0.51196	-1.3323	60.93	-122.93	1510.5515	-1.6744	0.76787	-1.7942	-63.147	75.929	199.196	0.03418	-0.046875	-0.24219	-93.7272	-2.746	265.035	-0.34912	0.35205	-0.49219	-52.26	23.46526	48.6318	0.18574	-0.074804	-0.098243	-87.3756	24.945	37.2705	0.12256	0.1499	0.068359
0.196	15.138	131.8045	463.085	-0.16992	0.03418	-0.37354	-71.775	51.308	1391.083	-0.59131	0.4751	-1.3276	104.743	-136.918	1549.379	-1.7031	0.79101	-1.8512	-70.5105	52.735	198.4837	0.036621	-0.053223	-0.23291	-72.814	-13.5612	362.293	-0.48535	0.34912	-0.56592	-8.03400000000001	69.48	17.8568	0.19043	-0.075976	-0.10684	-63.909	39.776	38.3069	0.14033	0.14863	0.08125
0.198	-11.064	150.9738	432.71858	-0.11719	0.015137	-0.35352	-113.378	-43.475	1368.788	-0.63281	0.45605	-1.3535	78.788	-97.649	1555.029	-1.7246	0.81406	-1.8984	-53.949	76.6611	177.32417	0.041504	-0.066406	-0.2251	-87.0794	65.67375	433.339	-0.55811	0.35303	-0.60107	-42.234	25.4734	20.4247	0.18955	-0.080762	-0.11816	-93.0579	42.495	24.46163	0.15469	0.13897	0.092285
0.2	-44.465	129.412	413.213	-0.082519	0.001709	-0.33642	-66.8892	-153.355	1399.232	-0.63818	0.45752	-1.3667	10.87548	-86.825	1574.161	-1.7338	0.84043	-1.9318	-106.957	99.9	135.668	0.036377	-0.071045	-0.21704	-72.6577	34.68	560.854	-0.73828	0.36523	-0.67285	-14.247	33.94179	51.703	0.18506	-0.07959	-0.12793	-40.63	34.7018	37.4501	0.17578	0.13154	0.10088
0.202	-5.291	128.38	393.663	-0.049805	-0.0058594	-0.32031	-89.2529	-156.11	1413.105	-0.64209	0.479	-1.3667	26.875	-52.4896	1574.992	-1.73	0.85596	-1.9546	-70.3974	91.92295	143.8146	0.02832	-0.071777	-0.2124	-71.0014	83.8842	686.452	-0.89966	0.38037	-0.72534	-35.903	41.5527	40.634	0.17451	-0.083887	-0.14131	-43.514	57.135	22.4562	0.19043	0.1168	0.11142
0.204	-50.3157	134.0927	330.6541	-0.015137	-0.022949	-0.30127	-110.841	-187.195	1416.9353	-0.66748	0.50244	-1.3721	-25.996	-18.131	1576.56	-1.725	0.85586	-1.9629	-67.693	103.735	133.442	0.019043	-0.067871	-0.20166	-107.501	101.4747	779.35	-1.0664	0.41406	-0.77734	-62.353	1.886	49.405	0.15996	-0.08291	-0.15547	-66.0619	35.6918	30.9687	0.20264	0.099121	0.1167
0.206	-21.458	91.02	310.3452	0.00097656	-0.028809	-0.29102	-46.167	-178.805	1420.202	-0.72217	0.52588	-1.394	18.33518	-36.9621	1540.867	-1.7089	0.83017	-1.955	-110.6082	98.763	119.06233	0.010742	-0.064941	-0.19678	-72.703	40.6589	880.0345	-1.2905	0.4917	-0.85303	-23.06	47.5854	50.6525	0.13925	-0.075879	-0.17109	-22.328	23.3637	39.38822	0.21162	0.082812	0.12695
0.208	-5.17899999999999	105.908	270.839	0.022949	-0.041504	-0.27441	-45.425	-155.478	1347.5722	-0.84277	0.54688	-1.415	25.0309	-39.1137	1507.8384	-1.687	0.79112	-1.9472	-37.594	81.058	113.371	-0.00097656	-0.053711	-0.19336	-91.456	71.538	945.3842	-1.3911	0.5376	-0.89209	-52.124	38.559	23.6614	0.1252	-0.068847	-0.1915	-37.752	30.4562	17.416	0.21455	0.065235	0.13379
0.21	-62.186	79.371	259.64	0.044189	-0.05249	-0.26514	-19.082	-203.749	1337.876	-0.92969	0.56641	-1.4258	-3.342	-17.7168	1446.589	-1.6556	0.74619	-1.928	-39.224	100.807	65.355	-0.0058594	-0.037842	-0.19043	-105.249	29.8627	1003.1664	-1.5664	0.65625	-0.96289	-42.958	25.5876	44.25	0.098633	-0.061523	-0.2085	-1.293	-2.084	35.8869	0.21651	0.052344	0.14121
0.212	-9.163	60.195	260.38	0.056152	-0.05957	-0.25781	-16.678	-179.986	1419.683	-1.1094	0.61133	-1.4609	36.698	-24.266	1424.295	-1.6147	0.70166	-1.8999	-54.218	60.4007	50.4017	-0.013672	-0.028809	-0.18457	-56.389	-9.453	1051.313	-1.6472	0.76294	-0.99976	-21.547	48.887	22.5508	0.079687	-0.048242	-0.22324	21.673	22.8497	28.158	0.21543	0.039062	0.14844
0.214	-45.1365	93.94856	236.364	0.071777	-0.075195	-0.24365	-20.7628	-173.549	1455.198	-1.2107	0.66529	-1.489	20.4476	27.8592	1402.031	-1.5564	0.65098	-1.881	-9.563	54.1241	45.364	-0.013184	-0.01416	-0.18848	-95.029	6.7324	1031.6609	-1.6929	0.88721	-1.0288	-54.3119	7.9562	5.5953	0.062012	-0.033204	-0.24658	-40.311	28.5156	6.58087	0.20801	0.03418	0.16113
0.216	-53.4365	76.969	211.4077	0.077637	-0.076172	-0.24805	-12.9756	-182.078	1474.453	-1.2822	0.71777	-1.5234	-18.2443	23.13	1382.138	-1.4968	0.59932	-1.8608	-48.486	63.1615	31.288	-0.012207	-0.0078125	-0.18018	-89.7973	-83.746	1029.239	-1.6714	1.0864	-1.0581	-41.012	12.554	39.965	0.04873	-0.0097658	-0.26299	16.492	19.07879	30.0091	0.20566	0.028027	0.15107
0.218	-0.228000000000002	102.29	197.6254	0.08252	-0.07959	-0.24463	7.6825	-113.9731	1444.08	-1.3125	0.77734	-1.5762	7.391	0.542999999999999	1379.445	-1.444	0.55127	-1.8456	-9.911	49.83	39.7036	-0.0043945	0.0063477	-0.17578	-34.233	-84.419	1048.24	-1.6323	1.1743	-1.0894	-43.902	35.3449	34.7548	0.040136	0.012696	-0.2792	4.485	39.666	16.4252	0.19678	0.024609	0.14776
0.22	-54.542	123.395	163.204	0.083497	-0.087158	-0.23803	8.809	-100.689	1387.5425	-1.3047	0.80762	-1.6035	0.268000000000001	28.409	1341.203	-1.4017	0.5166	-1.8333	36.067	62.494	39.316	0.001709	0.01294	-0.1665	-30.5672	-69.607	1044.26663	-1.5015	1.2944	-1.1597	-36.235	-19.8682	60.4469	0.03125	0.035645	-0.29785	-20.005	22.5853	26.5763	0.18623	0.028906	0.13799
0.222	-13.773	83.2051	158.5969	0.083496	-0.087891	-0.24072	42.3598	-98.638	1375.65	-1.2788	0.84229	-1.6636	-30.1091	16.5576	1329.214	-1.3784	0.50439	-1.8237	-33.604	46.6382	39.2913	0.0092773	0.01709	-0.16162	9.892	-97.571	1079.7658	-1.3396	1.3059	-1.1971	-24.243	12.344617	80.221	0.024609	0.056933	-0.31387	23.427	12.8015	40.4616	0.17422	0.03789	0.13135
0.224	-22.761	100.526	152.71	0.077148	-0.07959	-0.24023	24.8858	-56.01	1368.208	-1.27	0.86767	-1.7104	-7.101	51.62	1330.3574	-1.3548	0.50889	-1.8126	2.868	26.2283	64.729	0.022461	0.022461	-0.15234	1.641	-56.895	1082.983	-1.1665	1.2759	-1.2007	-47.971	8.02965	75.668	0.017578	0.068457	-0.33476	-26.148	40.6529	14.557	0.1582	0.049805	0.11719
0.226	-63.1455	83.2046	138.2926	0.07666	-0.079102	-0.23877	43.988	-80.309	1379.927	-1.2637	0.88867	-1.7559	-50.8911	85.819	1293.995	-1.327	0.525	-1.8055	-2.796	51.459	43.132	0.03418	0.023438	-0.1416	-2.512	-109.177	1084.731	-0.99316	1.1855	-1.1523	-26.201	3.836	143.6363	0.0082031	0.074707	-0.36133	-4.92299999999999	28.3997	30.4935	0.14248	0.066602	0.10283
0.228	11.825	44.168	138.5333	0.071289	-0.069336	-0.23779	106.679	-65.994	1419.7448	-1.2793	0.91406	-1.8125	-27.1054	61.086	1286.71836	-1.2938	0.54805	-1.7981	-33.77	46.445	44.482	0.04834	0.021973	-0.13232	25.569	-142.829	1121.159	-0.95459	1.1196	-1.1265	9.1688	53.702	197.0167	-0.011035	0.078027	-0.38056	5.27	40.035	20.723	0.1207	0.085351	0.089649
0.23	-22.477	78.38388	85.815	0.06543	-0.060058	-0.24414	90.7992	-72.4023	1396.641	-1.2988	0.9375	-1.8481	-7.327	61.875	1281.8213	-1.2485	0.56709	-1.7837	16.596	33.262	37.4024	0.059571	0.018311	-0.12182	21.578	-103.852	1121.695	-0.97217	0.95752	-1.0815	-14.4879	33.5223	263.904	-0.043457	0.081543	-0.39941	-71.6157	42.7113	-1.9686	0.10351	0.10644	0.072852
0.232	-29.799	55.288	76.285	0.067383	-0.047363	-0.24219	134.253	-119.417	1418.1613	-1.3105	0.9668	-1.8789	-51.5914	29.024	1250.159	-1.2046	0.57861	-1.7651	-32.718	28.7331	16.217	0.071289	0.014648	-0.11328	11.233	-139.935	1148.124	-1.0264	0.84766	-1.0547	21.90119	58.2926	405.945	-0.10244	0.078711	-0.41485	-26.725	22.3339	16.1816	0.087891	0.12803	0.058985
0.234	0.174999999999997	68.24	72.56	0.063965	-0.037598	-0.24072	109.75	-96.553	1416.586	-1.3262	1.0098	-1.9082	14.052	20.774	1250.8919	-1.1645	0.58008	-1.7441	-31.328	9.689	30.8418	0.08252	0.0043945	-0.093262	-9.403	-101.85	1187.239	-1.1011	0.76611	-1.0308	4.36	96.0167	536.17	-0.18447	0.068067	-0.44697	-43.404	43.514	-3.941	0.070313	0.15088	0.038086
0.236	-46.812	100.577	40.383	0.061523	-0.026367	-0.24268	112.775	-113.654	1409.98375	-1.332	1.0215	-1.9238	4.319	66.8256	1216.345	-1.1245	0.57666	-1.7198	-14.168	33.9762	7.364	0.084473	0.00097656	-0.080566	-40.399	-113.286	1196.11	-1.1929	0.71143	-1.0308	6.355	72.648	696.664	-0.27471	0.039942	-0.48018	-70.3249	34.138	5.3203	0.057031	0.17607	0.022559
0.238	-26.199	53.1092	55.5872	0.062012	-0.010742	-0.23584	130.365	-107.035	1444.198	-1.3184	1.0273	-1.9326	24.51	64.604	1191.8113	-1.0964	0.5665	-1.6901	-50.5637	54.5746	5.1643	0.10449	-0.0073242	-0.082031	-18.673	-200.935	1206.102	-1.2383	0.70313	-1.0449	75.542	87.8229	833.202	-0.38828	0.011133	-0.52695	-42.666	32.4014	36.2462	0.046386	0.19971	0.0020508
0.24	-28.162	62.161	56.3892	0.05957	0.0024414	-0.23193	83.632	-55.4794	1429.482	-1.3047	1.0127	-1.9209	30.339	84.8681	1191.8295	-1.0743	0.55557	-1.6583	-20.837	47.1223	32.066	0.11011	-0.017578	-0.065918	-11.883	-229.58	1205.91	-1.3066	0.72656	-1.1035	20.3059	64.434	933.269	-0.53564	-0.024414	-0.5752	-98.0654	58.956	12.51	0.039355	0.22861	-0.025293
0.242	-54.9369	46.912	52.2775	0.05957	0.0097656	-0.22705	103.811	-84.7811	1449.354	-1.2827	0.98779	-1.9097	-1.338	107.0621	1136.182	-1.0591	0.54248	-1.6167	-59.744	68.252	-2.817	0.12109	-0.029297	-0.050781	-41.6752	-299.562	1218.324	-1.3474	0.76636	-1.157	29.349	46.798	1065.85681	-0.72939	-0.056055	-0.63252	-69.1822	26.547	26.7305	0.031934	0.25791	-0.056152
0.244	0.161000000000001	22.315	70.7653	0.063965	0.021973	-0.21973	93.431	-48.221	1450.754	-1.2393	0.9375	-1.8926	31.454	94.0917	1114.9831	-1.0532	0.53076	-1.5763	-71.516	44.27427	7.5602	0.12939	-0.04248	-0.041504	-10.737	-325.7	1271.4784	-1.3945	0.80664	-1.2129	42.19	69.933	1140.9	-0.97579	-0.080664	-0.69062	-43.97	27.0587	47.6984	0.017578	0.2876	-0.081543
0.246	-48.776	78.618	40.931	0.065674	0.024903	-0.20996	73.959	-17.016	1416.0666	-1.209	0.92188	-1.8789	18.658	126.726	1106.5501	-1.0485	0.51729	-1.5374	-26.069	39.4922	19.1742	0.13574	-0.050781	-0.037109	-49.864	-275.595	1306.6959	-1.4858	0.854	-1.2749	8.4405	28.08	1178.1781	-1.2629	-0.095508	-0.74258	-104.363	20.37	59.242	0.0086914	0.31172	-0.1126
0.248	-52.746	61.6229	32.17266	0.068848	0.032227	-0.19873	88.222	-29.5988	1391.9401	-1.146	0.8833	-1.8687	-14.571	149.51	1074.052	-1.0415	0.50322	-1.4952	-90.106	55.320762	25.998	0.14355	-0.067871	-0.029297	-26.038	-283.705	1320.77526	-1.5391	0.87305	-1.3037	39.29251	-9.24	1219.172	-1.5877	-0.088477	-0.8084	-63.201	22.5838	93.6771	-0.0064453	0.33447	-0.14082
0.25	-6.835	54.495	36.5582	0.068848	0.021484	-0.18896	88.794	17.64914	1355.5428	-1.1028	0.86059	-1.8689	-9.384	140.35	1085.845	-1.0348	0.48828	-1.4543	-68.0917	17.189	64.44	0.14844	-0.079102	-0.016357	26.296	-234.7699	1357.0989288	-1.6641	0.90332	-1.3438	31.0581	-20.3384	1222.1	-1.9121	-0.045898	-0.88477	-67.782	59.957	106.747	-0.025977	0.35517	-0.16817
0.252	-66.9803	71.871	17.5092	0.07373	0.020996	-0.18213	54.078	26.6196	1298.603	-1.0684	0.8418	-1.8691	-39.849	177.741	1025.5331	-1.021	0.46826	-1.4097	-62.567	31.02843	34.5131	0.15186	-0.088867	-0.0087891	-0.507999999999999	-212.925	1393.577	-1.752	0.92579	-1.3701	-21.216	-87.148	1241.86	-2.2167	0.050098	-0.96943	-101.7569	66.9378	162.4859	-0.043848	0.37285	-0.19385
0.254	-46.774	27.6117	19.3645	0.08252	0.003418	-0.16846	54.219	20.9106	1313.8397	-1.0332	0.83594	-1.8574	-33.201	132.641	1001.3296	-1.0013	0.45635	-1.3654	-105.3455	40.3029	15.578	0.15088	-0.10303	-0.0019531	-16.087	-227.276	1471.7282	-1.8281	0.96289	-1.3906	2.436	-66.408	1262.416	-2.4659	0.18311	-1.0624	-59.187	64.5418	270.061	-0.066406	0.39355	-0.22363
0.256	-34.784	44.198	17.7509	0.078369	-0.0012207	-0.1538	30.8794	65.551	1301.2047	-1.0273	0.83984	-1.8496	-1.43	134.524	994.005	-0.97481	0.44736	-1.321	-38.089	30.23169	31.80373	0.15039	-0.10498	-0.00048828	-50.29452	-167.689	1523.6035	-1.9077	1.0063	-1.4272	4.419	-61.446	1248.3588	-2.6171	0.38311	-1.1448	-108.7545	113.697	380.891	-0.08916	0.41025	-0.25078
0.258	-70.4151	51.7646	14.0862	0.083496	-0.012695	-0.14307	37.0339	42.1015	1282.13348	-1.0117	0.85156	-1.8301	-42.7215	147.1717	924.4463	-0.94863	0.43369	-1.2808	-51.657	52.77	11.807	0.15527	-0.11963	0.01416	-55.4943	-148.8715	1550.684	-1.9395	1.0352	-1.4414	3.377	-86.262	1264.8044	-2.6303	0.74199	-1.184	-87.357	95.4026	538.542	-0.12266	0.42646	-0.28438
0.26	-25.318	9.489	36.2213	0.07959	-0.030762	-0.12744	66.025	61.65102	1258.786	-1.0061	0.85181	-1.8035	-20.783	107.721	898.8942	-0.91387	0.42656	-1.2408	-79.7127	24.826	24.142	0.15674	-0.12378	0.014892	-38.67	-119.652	1579.374	-1.9937	1.0864	-1.4683	30.881	-63.913	1256.6183	-2.5898	1.1973	-1.2344	-53.244	107.513	679.078	-0.1625	0.4249	-0.33047
0.262	-57.525	51.0864	6.927	0.075195	-0.045898	-0.12158	-7.7899	81.8031	1201.666	-0.99609	0.85547	-1.7734	-37.358	146.77197	851.8212	-0.87842	0.41553	-1.2007	-16.834	17.84109	29.9367	0.16016	-0.12402	0.01709	-58.664	-73.459	1573.6566	-2.028	1.1315	-1.488	-9.712	-84.4829	1222.5719	-2.4569	1.5447	-1.3791	-84.521	102.85	824.407	-0.20937	0.41094	-0.38359
0.264	-57.4117	22.762	18.6831	0.078613	-0.056152	-0.10156	-15.732	44.5991	1218.083	-0.9668	0.84375	-1.7285	-81.2909	127.327	809.394	-0.83672	0.40703	-1.1529	-64.6937	26.9068	2.768	0.16553	-0.12402	0.014648	-51.363	-101.239	1558.837	-2.0562	1.1724	-1.4976	-20.517	-78.617	1286.7578	-2.1309	1.6555	-1.5309	-43.806	71.951	972.853	-0.27783	0.38867	-0.46143
0.266	-17.322	20.4583	37.8757	0.07666	-0.065673	-0.090577	-31.7109	84.908	1224.5605	-0.95166	0.83643	-1.7085	-23.19	95.024	810.58208	-0.80195	0.39258	-1.1101	-23.344	11.879	39.52814	0.17139	-0.12695	0.01709	-39.595	-92.315	1565.737	-2.0938	1.2188	-1.5059	-47.923	6.209	1311.6322	-1.5887	1.568	-1.5738	-75.993	82.753	1024.814	-0.36758	0.36123	-0.52803
0.268	-49.7951	62.177	23.78341	0.08252	-0.080566	-0.079102	-35.2322	77.13	1212.2	-0.91406	0.81836	-1.6543	-74.7712	138.379	773.5837	-0.76562	0.37735	-1.0653	-2.598	25.6849	43.6099	0.18164	-0.12744	0.015137	-70.5983	-83.423	1578.629	-2.1089	1.2407	-1.5132	-82.7849	-6.26000000000001	1331.6478	-1.0511	1.3755	-1.5116	-99.43	54.238	1091.0243	-0.50196	0.32686	-0.60117
0.27	-31.09	27.9012	47.457	0.089355	-0.091797	-0.061035	-8.3186	48.913	1211.674	-0.89111	0.79639	-1.6098	-75.7087	102.743	758.176	-0.72822	0.3667	-1.0188	-38.185	46.0077	22.3672	0.19361	-0.12622	0.015381	-47.9683	-109.594	1629.6912	-2.1284	1.272	-1.5093	-44.084	2.997	1344.0269	-0.68945	1.0938	-1.4199	-60.89	27.357	1132.349	-0.66954	0.29599	-0.66407
0.272	-27.616	60.523	18.2783	0.09082	-0.10059	-0.053223	-4.5516	98.9521	1173.9994	-0.875	0.77051	-1.5605	-60.9034	137.128	744.016	-0.69922	0.35693	-0.97266	9.825	36.664	29.1668	0.20703	-0.12598	0.015137	-12.173	-91.985	1651.1276	-2.1387	1.291	-1.5	-68.404	-45.119	1298.974	-0.5418	0.78516	-1.3649	-85.181	19.896	1141.765	-0.88488	0.26709	-0.72276
0.274	-47.609	66.4663	11.016	0.09082	-0.11084	-0.04834	0.2267	63.373	1139.3053	-0.85303	0.74268	-1.4985	-103.049	177.673	692.1362	-0.66993	0.34024	-0.92617	-8.831	71.879	8.79	0.21729	-0.12256	0.0092773	-29.854	-114.121	1650.30575	-2.1328	1.2891	-1.4863	-89.013	-160.3975	1313.418	-0.50312	0.5461	-1.3258	-67.796	-59.499	1173.999	-1.125	0.25928	-0.76367
0.276	-18.773	9.826	32.8076	0.092285	-0.1167	-0.036133	0.936999999999998	95.544	1134.038	-0.84619	0.72119	-1.4663	-73.5914	151.132	669.0972	-0.63858	0.32325	-0.88545	-29.42	47.255	34.947	0.21826	-0.125	0.0053711	34.586	-129.771	1674.873	-2.1016	1.2813	-1.4648	-63.0002	-176.9953	1350.8333	-0.5164	0.40547	-1.2914	-46.051	-63.598	1178.038	-1.39	0.28789	-0.7996
0.278	-41.96	45.4758	34.7896	0.096191	-0.12109	-0.022461	-2.79	112.74	1120.7251	-0.83301	0.69043	-1.4043	-63.073	184.846	631.5583	-0.6085	0.30723	-0.83819	17.867	14.3708	42.6629	0.23096	-0.12305	0.0063477	-11.553	-94.756	1668.7073	-2.0688	1.2597	-1.4536	-62.42711	-213.87	1349.944	-0.54922	0.33457	-1.274	-89.444	-58.743	1183.524	-1.6386	0.34441	-0.8414
0.28	-36.695	14.018	33.423	0.095215	-0.12695	-0.013672	27.529	61.398	1119.586	-0.81396	0.66992	-1.3603	-58.396	159.4242	566.922	-0.57744	0.28945	-0.79365	-17.063	25.318	16.8235	0.23438	-0.12402	0.0024414	-33.204	-93.113	1675.701	-2.0254	1.2285	-1.4414	-46.341	-239.668	1400.239	-0.59717	0.30518	-1.2769	-54.0236	-91.364	1208.827	-1.8507	0.43542	-0.88319
0.282	9.03	10.7921	50.13	0.097168	-0.13037	-0.0097656	39.0607	117.02595	1079.11	-0.79102	0.65234	-1.3174	-37.843	117.421	559.6459	-0.55078	0.26953	-0.75049	-3.782	-3.918	27.99	0.23291	-0.12695	0.0019531	6.345	-60.8857	1697.265	-1.9644	1.1997	-1.4136	-0.459	-224.56	1347.916	-0.63428	0.31221	-1.3116	-31.486	-71.2582	1175.589	-1.9677	0.56812	-0.91855
0.284	-47.991	52.601	22.2901	0.10156	-0.13086	-0.0053711	30.1414	113.314	1011.7334	-0.75439	0.62549	-1.2593	-45.733	161.5671	530.844	-0.52363	0.25673	-0.70498	20.134	10.6012	20.978	0.22949	-0.12891	0.003418	-30.7094	-34.9963	1683.932	-1.9429	1.1938	-1.4038	-1.537	-303.557	1354.068	-0.65469	0.34091	-1.35	-31.092	-96.138	1135.8597	-1.9839	0.74072	-0.94482
0.286	-9.962	11.4499	38.1543	0.1062	-0.12866	-0.0043945	26.6656	119.72	1000.9119	-0.73877	0.61084	-1.23	-49.375	119.964	508.767	-0.49404	0.24619	-0.66221	-46.721	30.0051	19.0373	0.22754	-0.12549	-0.0048828	1.329	-68.4127	1654.301	-1.9038	1.1821	-1.3843	13.347	-277.251	1432.937	-0.66524	0.39717	-1.3739	20.46	-91.9936	1153.8502	-1.9129	0.95207	-0.97306
0.288	-8.624	36.796	22.3184	0.11523	-0.12988	0.0068359	-8.239	170.894	962.926	-0.70508	0.58203	-1.1758	-21.681	132.5181	492.936	-0.46201	0.23642	-0.61924	-6.279	12.8971	31.9568	0.21973	-0.12549	0.00048828	-17.224	-40.921	1620.631	-1.8728	1.1818	-1.3738	7.5781	-220.726	1464.6639	-0.6877	0.46015	-1.3926	-44.623	-48.315	1160.4992	-1.7959	1.1447	-1.017
0.29	-52.1621	37.424	13.9213	0.12402	-0.12988	0.013184	-21.638	133.0315	947.05156	-0.68067	0.56641	-1.1353	-38.369	161.6461	430.09	-0.42891	0.22617	-0.56641	-13.036	44.854	7.5874	0.21485	-0.125	-0.003418	-38.603	-32.1789	1563.577	-1.8433	1.188	-1.3589	1.393	-219.81	1514.628	-0.75244	0.5127	-1.4136	-71.904	-71.26	1221.011	-1.6087	1.2513	-1.0886
0.292	5.108	-12.2313	35.2143	0.12598	-0.12793	0.0097656	-22.193	147.5543	944.0779	-0.65869	0.54639	-1.0894	-17.597	113.1802	422.2963	-0.39209	0.21729	-0.521	-43.607	22.3704	23.9914	0.21387	-0.12207	-0.0058594	-16.349	-38.9222	1549.859	-1.7944	1.2036	-1.3394	27.0947	-125.959	1519.785	-0.86484	0.54697	-1.4492	-37.048	-55.31	1245.8915	-1.3615	1.2613	-1.1274
0.294	-33.434	23.0222	26.722	0.13623	-0.11963	0.00048828	-18.809	144.34531	880.79	-0.63867	0.52344	-1.0342	-8.277	174.764	408.146	-0.35674	0.21162	-0.47754	-17.181	7.8367	53.57	0.20215	-0.12012	-0.0092773	-31.444	5.02745	1540.328	-1.7671	1.2134	-1.3306	6.892	-112.259	1474.795	-1.019	0.56767	-1.4839	-107.374	-110.873	1218.834	-1.1069	1.2104	-1.1187
0.296	-28.701	-0.871000000000002	40.820949	0.14502	-0.11304	-0.0029296	15.082	88.0684	877.8166	-0.62695	0.51172	-1.0059	-35.146	156.1071	382.763	-0.31074	0.20147	-0.43799	-87.3975	32.6255	15.884	0.20117	-0.11914	-0.011719	-45.981	-22.171	1522.1924	-1.7148	1.2266	-1.3066	42.471	-115.895	1483.3548	-1.1988	0.5958	-1.5182	-52.2619	-185.559	1224.417	-0.94041	1.0977	-1.0759
0.298	-1.548	-1.4987	37.5482	0.15283	-0.10498	-0.0053711	-11.387	143.39	853.9321	-0.60742	0.48828	-0.94531	-7.418	127.6587	390.8336	-0.26699	0.19483	-0.39658	-46.862	16.156	26.7132	0.1958	-0.11816	-0.018555	-16.927	-7.4787	1527.165	-1.6667	1.2292	-1.2869	56.038	-50.528	1477.848	-1.3576	0.6332	-1.5709	-48.1613	-208.824	1218.299	-0.89596	0.95561	-1.0134
0.3	-57.752	47.9297	-1.282	0.15869	-0.098633	-0.01709	-31.25	137.002	797.8478	-0.58911	0.47095	-0.89722	-21.803	167.096	364.163	-0.22744	0.17549	-0.35908	-45.491	36.855	6.331	0.19336	-0.11475	-0.024414	-41.011	32.7946	1484.251	-1.6299	1.2285	-1.2656	63.903	-84.798	1495.537	-1.4609	0.67969	-1.627	-66.4253	-259.858	1252.741	-0.96175	0.78897	-0.97162
0.302	-19.422	9.0523	19.7892	0.16211	-0.099121	-0.01709	-18.384	118.2462833	781.988	-0.57568	0.45752	-0.84717	-16.953	104.3933	349.657	-0.18799	0.15967	-0.31934	-99.672	51.7496	-5.109	0.19287	-0.11523	-0.03125	-25.056	12.0895	1464.592	-1.5796	1.2134	-1.23	92.493	-61.787	1547.5959	-1.5017	0.71201	-1.688	-33.617	-270.717	1309.772	-1.0759	0.63626	-0.93789
0.304	-22.065	42.814	10.488	0.16064	-0.080078	-0.023926	-25.84	152.6635	703.947	-0.54736	0.43408	-0.78662	2.117	124.4027	335.7305	-0.15557	0.14053	-0.28144	-52.523	15.6585	28.4325	0.19727	-0.11182	-0.040527	-37.257	60.909	1451.988	-1.5562	1.2017	-1.2104	81.674	-49.702	1510.397	-1.507	0.73438	-1.7496	-30.601	-271.122	1288.0712	-1.1982	0.52051	-0.91113
0.306	-55.1653	49.6811	17.2017	0.15844	-0.070801	-0.032714	-51.91	91.58	685.201	-0.53076	0.42139	-0.75244	-28.968	146.986	288.339	-0.12588	0.12051	-0.2418	-83.3693	53.036	-12.217	0.19458	-0.11109	-0.048828	-78.08762	45.975	1415.804	-1.498	1.1709	-1.1602	76.402	-102.696	1533.9751	-1.4914	0.74141	-1.8075	14.467	-333.603	1315.085	-1.3097	0.45514	-0.89738
0.308	-29.438	-0.5858	25.30797	0.15771	-0.058594	-0.041992	-49.956	120.656	698.1517	-0.49268	0.40088	-0.68506	-4.743	86.3401	273.76805	-0.10635	0.09629	-0.20782	-79.78024	47.4225	0.9145	0.19434	-0.1123	-0.057617	-45.427	3.404	1439.2197	-1.4553	1.1398	-1.1276	111.832	-57.13	1574.2634	-1.4972	0.75156	-1.8633	76.814	-317.272	1339.417	-1.408	0.44842	-0.92234
0.31	-42.298	34.386	11.435	0.15625	-0.039063	-0.046875	-65.169	161.9115	652.407	-0.46215	0.38525	-0.62842	-23.228	134.663	269.1167	-0.084082	0.079883	-0.17363	-41.582	37.616	25.1731	0.19043	-0.11084	-0.064453	-66.4455	15.6723	1405.7746	-1.4043	1.1113	-1.0957	122.042	-64.64	1568.543	-1.5352	0.77539	-1.9219	32.2404	-321.074	1406.013	-1.489	0.48684	-0.98185
0.312	-55.218	3.779	23.5682	0.15625	-0.027832	-0.057617	-59.2716	137.7919	634.4235	-0.42725	0.37256	-0.58057	-42.707	102.2723	238.16	-0.063965	0.060547	-0.14014	-73.5502	58.014	20.474	0.18799	-0.11182	-0.072754	-59.9274	-28.6729	1372.8262	-1.332	1.0547	-1.0518	76.682	-82.377	1613.949	-1.5811	0.81074	-1.9897	38.929	-304.061	1476.604	-1.5518	0.55781	-1.0507
0.314	-31.412	-0.7881	7.1669	0.16895	-0.0097656	-0.064453	-61.2294	182.864	587.7427	-0.37988	0.34326	-0.50977	-34.045	63.103	244.889	-0.045117	0.046973	-0.10547	-33.754	13.611	30.2236	0.16357	-0.10889	-0.088867	-50.662	-17.1143	1350.7902	-1.293	1.0352	-1.0293	69.351	-29.149	1606.4904	-1.614	0.85468	-2.0418	19.506	-208.0865	1476.551	-1.605	0.64502	-1.1157
0.316	-70.3803	53.92	-24.5567	0.17603	0.0031738	-0.07251	-82.3341	148.954	539.599	-0.34668	0.33398	-0.48438	-58.822	120.548	201.871	-0.027441	0.040625	-0.074414	-27.272	13.8911	11.2512	0.14819	-0.10498	-0.1001	-92.2787	32.072	1286.476	-1.2339	0.98486	-0.99365	38.8648	-90.159	1604.724	-1.6332	0.9043	-2.0812	-44.207	-185.709	1500.076	-1.6605	0.72569	-1.1713
0.318	-34.906	10.3441	-0.0550999999999995	0.17871	0.013672	-0.080566	-71.017	136.544	531.8261	-0.29395	0.29932	-0.4209	-60.145	69.642	190.6533	-0.0055663	0.027734	-0.049414	-65.80306	27.692	1.9774	0.12598	-0.098633	-0.11279	-73.909	28.24	1249.6746	-1.1844	0.94751	-0.96167	41.5293	-82.702	1639.694	-1.6315	0.95595	-2.1112	-8.652	-142.772	1518.634	-1.7211	0.79693	-1.2308
0.32	-34.559	43.073	-7.3493	0.18457	0.019043	-0.085938	-69.5706	183.372	498.705	-0.26049	0.2749	-0.38696	-53.508	95.039	199.6394	0.014063	0.019629	-0.028711	-4.883	13.0425	40.914	0.11182	-0.089355	-0.13428	-43.949	79.2381	1236.286	-1.146	0.91162	-0.93994	58.408	-46.6059	1591.042	-1.6094	0.99805	-2.127	-31.475	-118.429	1496.216	-1.7801	0.85465	-1.2724
0.322	-46.74	48.5355	4.0147	0.18945	0.022949	-0.098145	-49.929	134.1183	489.524	-0.22949	0.24805	-0.34961	-70.0348	141.907	173.8539	0.037109	0.021484	-0.0063477	-31.329	56.724	22.2787	0.099609	-0.079102	-0.14746	-42.993	90.0202	1215.0517	-1.0991	0.86768	-0.90576	45.332	-75.448	1547.896	-1.5762	1.009	-2.1317	-38.776	-134.164	1520.941	-1.834	0.88841	-1.2957
0.324	-12.491	1.761	32.356	0.19043	0.025391	-0.10498	-49.059	152.811	479.392	-0.18359	0.19336	-0.27393	-54.839	75.8752	171.67	0.060645	0.020117	0.0073242	-42.48	43.7242	17.8503	0.08252	-0.068848	-0.17236	-12.313	59.8189	1229.842	-1.0815	0.84814	-0.896	78.633	17.8534	1497.7161	-1.5476	0.98799	-2.1171	16.749	-73.296	1552.055	-1.8765	0.90674	-1.314
0.326	-41.18	57.388	0.395	0.18726	0.020997	-0.11548	-53.6882	152.8358	403.841	-0.1709	0.16846	-0.24463	-56.085	130.474	151.6037	0.081933	0.01914	0.024707	10.355	28.846	17.0676	0.068115	-0.055664	-0.19165	-31.019	108.012	1194.0021	-1.0425	0.80713	-0.86279	33.372	28.3485	1416.291	-1.5225	0.94424	-2.0812	-22.173	-70.046	1568.582	-1.9134	0.91349	-1.3297
0.328	-33.85	41.5654	20.0266	0.18555	0.02002	-0.12939	-43.932	113.48	392.902	-0.14795	0.13135	-0.2041	-70.32765	91.5194	141.3247	0.10616	0.017968	0.040332	-22.092	61.886	19.56	0.05957	-0.03418	-0.21191	-46.597	103.023	1160.11	-1.0132	0.7832	-0.84424	21.0715	23.7	1434.654	-1.4942	0.87168	-2.0342	-19.279	-83.112	1617.5218	-1.962	0.92568	-1.3489
0.33	-14.042	35.97	26.3793	0.1748	0.02002	-0.13428	-36.111	176.294	372.225	-0.12598	0.10156	-0.16626	-62.198	62.305	145.6436	0.11943	0.015918	0.051758	-1.555	24.795	48.037	0.035156	-0.0073242	-0.23828	-29.392	141.012	1136.51	-0.9873	0.76465	-0.82617	27.891	80.9191	1422.164	-1.4644	0.79346	-1.9858	3.38500000000001	-61.0662	1619.382	-2.0123	0.94212	-1.3668
0.332	-41.428	68.946	5.857	0.16553	0.021484	-0.14502	-29.033	145.51	366.8593	-0.10352	0.078613	-0.13428	-49.99	118.476	94.996	0.13721	0.015625	0.060547	19.083	39.591	37.0373	0.023926	0.010742	-0.24805	-43.12	181.266	1077.419	-0.95654	0.74463	-0.80127	7.3874	27.891	1399.369	-1.4209	0.69648	-1.9495	-39.842	-87.838	1649.19091	-2.084	0.97663	-1.3865
0.334	-24.725	16.8973	12.63901	0.14648	0.024902	-0.1543	-36.684	118.641	395.971	-0.072754	0.053223	-0.10938	-60.959	59.21	79.7768	0.14844	0.014941	0.063867	-27.431	54.8389	26.77363	0.0063477	0.036621	-0.27246	-25.632	141.833	1058.0024	-0.94531	0.72852	-0.78809	30.6746	59.6218	1392.933	-1.3761	0.60918	-1.9155	-17.988	-65.485	1712.726	-2.166	1.0156	-1.418
0.336	-24.801	33.765	9.8614	0.12915	0.03418	-0.16944	-22.638	149.124	347.3104	-0.057129	0.040527	-0.087891	-50.852	75.023	92.73054	0.15967	0.0097655	0.065332	9.172	29.5627	35.7373	-0.0078125	0.059815	-0.3003	-2.23500000000001	164.997	1028.345	-0.91406	0.70898	-0.76563	-21.6042	88.308	1322.712	-1.3269	0.54434	-1.8827	-26.455	-21.9276	1708.432	-2.2286	1.0657	-1.4557
0.338	-41.829	58.1912	7.2824	0.11084	0.04834	-0.17627	-2.071	95.7234	335.77738	-0.02002	0.04248	-0.065918	-54.209	86.508	80.5812	0.1667	0.0070312	0.075879	-9.736	49.188	45.955	-0.024414	0.067383	-0.31787	-9.348	153.145	989.842	-0.89233	0.68921	-0.74731	-29.355	65.943	1315.231	-1.2901	0.50723	-1.869	-107.026	-41.057	1730.065	-2.2665	1.1106	-1.4878
0.34	-9.312	17.2336	33.136	0.085938	0.056641	-0.1875	9.918	125.6081	339.5182	0.0068361	0.037354	-0.048584	-34.764	15.606	85.2142	0.17031	0.0044922	0.083887	-32.005	17.013	71.4021	-0.056641	0.077148	-0.35156	18.894	107.9567	999.553	-0.86572	0.67139	-0.73096	-16.743	124.451	1321.946	-1.2554	0.49707	-1.853	-82.178	-19.959	1723.841	-2.2717	1.1549	-1.5131
0.342	-20.538	67.891	12.257	0.075195	0.061035	-0.19189	-9.515	141.2926	305.4275	0.032715	0.037598	-0.03125	-40.388	75.3178	83.3208	0.16699	0.0083008	0.090332	0.850000000000001	10.5401	91.016	-0.077148	0.079102	-0.36621	-18.064	153.1555	955.259	-0.83545	0.64697	-0.7085	-49.066	107.474	1296.598	-1.2287	0.51192	-1.8475	-123.16	-51.6614	1687.1196	-2.2452	1.1825	-1.5365
0.344	-31.431	45.6645	16.2104	0.063477	0.080566	-0.20654	-8.229	95.3844	300.671	0.072266	0.03418	-0.013184	-27.682	51.6522	68.232	0.16269	0.0080078	0.092871	-32.807	60.603	107.855	-0.1416	0.074707	-0.39502	0.835999999999999	124.226	908.7452	-0.81201	0.64258	-0.70068	-28.7274	70.995	1315.3791	-1.2026	0.54287	-1.8386	-83.348	-71.896	1714.34	-2.1958	1.1978	-1.5542
0.346	13.895	21.42525	41.0331	0.051758	0.095947	-0.22095	29.673	149.195	255.0694	0.088379	0.036621	-0.0048828	-20.449	14.372	83.31	0.15781	0.0095702	0.096875	-17.1739	26.9459	176.91	-0.20386	0.056884	-0.42236	30.797	140.605	886.626436	-0.77002	0.62842	-0.67822	15.5265	85.4452	1281.324	-1.1698	0.57647	-1.8245	-58.391	-34.2977	1687.55	-2.13	1.209	-1.5558
0.348	-43.3625	62.8653	39.0851	0.037598	0.10205	-0.23242	-19.064	108.723	229.3816	0.11963	0.044922	-0.00097656	-26.834	77.655	67.0693	0.15664	0.013086	0.1	-6.52	30.7607	242.079	-0.28467	0.026367	-0.4585	9.377	167.862	828.704	-0.74097	0.61353	-0.66284	-19.0643	40.529	1247.618	-1.1309	0.60088	-1.8095	-108.3682	-30.318	1628.3466	-2.0594	1.2057	-1.5476
0.35	-27.18	19.886	52.21	0.026855	0.11426	-0.24561	-5.148	84.62925	244.734	0.13916	0.045166	0.010254	-9.221	31.986	38.062	0.15186	0.025293	0.10039	-27.8203	47.074	337.306	-0.42822	-0.022461	-0.51514	2.577	136.715	831.5991	-0.70654	0.6001	-0.64404	-9.99	76.826	1265.119	-1.0996	0.61719	-1.7891	-38.676	11.04947	1600.3178	-1.9871	1.19	-1.5211
0.352	-19.051	41.106	44.18	0.018066	0.12158	-0.25049	-10.189	114.2881	223.06	0.16016	0.042969	0.020508	-3.024	41.664	40.807	0.15186	0.029297	0.099609	15.785	31.4719	487.538	-0.51904	-0.043457	-0.54443	-8.729	187.608	823.272	-0.65967	0.57178	-0.62158	22.839	126.12	1225.38	-1.0773	0.62412	-1.7626	-86.8245	40.198	1551.308	-1.9313	1.1718	-1.4942
0.354	-59.58	58.1316	24.7447	0.003418	0.12402	-0.25781	-28.117	63.883	207.8677	0.17529	0.044922	0.02002	-18.557	65.8399	30.4457	0.14805	0.039063	0.098242	-15.251	96.72	629.438	-0.75391	-0.098633	-0.60547	-22.1622	199.937	782.322	-0.63867	0.55371	-0.61328	8.967	87.064	1205.394	-1.0668	0.62305	-1.7277	-75.0362	16.706	1545.826	-1.8843	1.147	-1.4604
0.356	-16.355	5.598	40.428	-0.0085447	0.12891	-0.25855	-9.998	104.5716	194.2153	0.17773	0.047363	0.019531	-15.176	-1.973	37.4102	0.1457	0.043848	0.099611	1.45569	79.299	761.593	-0.98341	-0.13428	-0.65723	-11.144	172.8155	760.803	-0.5874	0.51611	-0.58545	32.073	145.2212	1181.977	-1.0684	0.61328	-1.6918	-27.104	39.3272	1530.3195	-1.8518	1.1235	-1.4271
0.358	-47.022	46.511	13.5869	-0.022949	0.13037	-0.26855	-26.125	108.143	181.8371	0.18457	0.053223	0.028809	-17.76	58.43393	23.683	0.14336	0.046582	0.094531	45.198	36.813	893.0542	-1.2363	-0.15967	-0.69531	-28.783	201.975	712.8691	-0.55249	0.48535	-0.56152	-6.878	142.0555	1116.5073	-1.0736	0.604	-1.6482	-75.97	32.108	1488.566	-1.8202	1.1019	-1.3991
0.36	-36.52	23.4383	17.2087	-0.041992	0.11621	-0.29004	-49.928	71.7149	184.991	0.18652	0.05957	0.024903	-20.998	41.6214	12.928	0.13818	0.052539	0.09375	-16.1514	63.429	976.208	-1.6348	-0.15527	-0.77734	-34.967	156.5391	653.889	-0.51221	0.45166	-0.53662	1.002	145.9063	1118.3383	-1.0762	0.5957	-1.5977	-48.301	39.0878	1490.4055	-1.7933	1.0914	-1.3785
0.362	-21.096	8.6734	52.6997	-0.055176	0.10449	-0.29688	-37.66	116.478	170.9602	0.18604	0.06543	0.03125	-35.581	5.568	35.2365	0.12598	0.054688	0.086426	4.12903	1.2203	1077.1331	-1.8379	-0.11816	-0.82227	-16.876	154.8706	646.743	-0.4707	0.40527	-0.50488	24.58	230.34	1094.1442	-1.0671	0.59111	-1.5656	-67.5141	72.791	1479.127	-1.7665	1.0861	-1.3594
0.364	-62.96885	30.42433	76.288	-0.10107	0.085938	-0.31836	-38.614	80.789	135.3187	0.17822	0.080078	0.031738	-21.799	72.318	15.4037	0.11523	0.051074	0.083594	20.4617	-1.589	1130.7863	-2.2163	0.013672	-0.92725	-33.473	182.172	590.824	-0.44531	0.38867	-0.49023	-50.294	197.136	1065.083	-1.0472	0.59033	-1.5319	-62.1062	56.209	1457.78984	-1.7397	1.1011	-1.3394
0.366	-47.086	-26.3223	108.6325	-0.16187	0.063721	-0.33178	-63.9192	67.2354	137.4234	0.1792	0.086426	0.03125	-33.559	15.1474	4.0637	0.104	0.056055	0.079981	-24.632	-2.995	1138.835	-2.44	0.19165	-1.0122	-26.853	127.436	593.9039	-0.40381	0.34521	-0.4585	-20.822	192.148	1033.77	-1.0179	0.58291	-1.4979	-9.784	39.0067	1461.1424	-1.7028	1.1052	-1.3295
0.368	-21.008	8.4315	127.668	-0.2373	0.032227	-0.35498	-50.4143	84.9627	111.429	0.17725	0.093262	0.040527	-42.453	34.484	10.794	0.084473	0.058398	0.074121	22.941	-53.5673	1175.339	-2.6035	0.42383	-1.1035	-28.362	168.6555	559.2476	-0.3706	0.31445	-0.44018	-9.39	180.71	964.9806	-0.97705	0.57237	-1.4589	-23.073	35.845	1409.733	-1.6624	1.1064	-1.3138
0.37	-37.253	39.4822	158.492	-0.36963	-0.019531	-0.40527	-63.3236	18.093	99.466	0.1687	0.10059	0.042724	-57.0883	68.55	4.954	0.069824	0.056641	0.068262	-7.789	-29.152	1170.261	-2.6641	0.82227	-1.2148	-45.57064	155.1483	507.638	-0.33545	0.28271	-0.41943	-52.0973	143.5794	938.96922	-0.93164	0.56201	-1.4219	-33.263	-6.606	1390.8104	-1.6148	1.1033	-1.2927
0.372	-13.83	-6.6208	238.5002	-0.44531	-0.051758	-0.43213	-60.715	45.268	98.853	0.16602	0.10156	0.041504	-52.4349	-1.808	22.6517	0.056641	0.071777	0.069824	-28.526	-62.0303	1207.877	-2.6592	1.0449	-1.2656	-22.255	139.5841	501.2844	-0.2832	0.2373	-0.39453	-16.539	193.391	929.3246	-0.89004	0.54804	-1.3801	18.325	11.2769	1369.2112	-1.5773	1.0919	-1.2772
0.374	-12.8613	51.965	342.47	-0.64502	-0.11279	-0.48779	-55.6722	52.326	78.0041	0.15967	0.099609	0.039063	-46.687	41.3965	26.1242	0.042773	0.081543	0.067773	33.856	-61.5764	1246.008	-2.582	1.4551	-1.4297	-34.704	191.588	475.098	-0.26074	0.2168	-0.375	-49.848	162.7156	906.0819	-0.8542	0.53144	-1.3347	-48.163	28.868	1336.2196	-1.541	1.0723	-1.2578
0.376	-6.5113	34.0259	487.068	-0.85083	-0.16504	-0.54419	-56.724	19.18	83.3577	0.15552	0.095947	0.038818	-60.152	29.75	3.977	0.034375	0.091602	0.064746	-0.624000000000002	-40.852	1232.8276	-2.3698	1.5984	-1.5418	-49.864	140.1111	466.7243	-0.21533	0.17236	-0.35107	-44.194	144.342	875.733	-0.81943	0.51231	-1.285	-30.377	16.476	1337.472	-1.5072	1.046	-1.2352
0.378	17.853	18.704	655.689	-1.0933	-0.20557	-0.59814	-44.019	85.08	68.52614	0.14697	0.087891	0.039551	-49.37	2.25	21.53835	0.029297	0.10605	0.068653	10.952	-97.842	1242.926	-1.9839	1.604	-1.5894	-29.906	137.4882	457.129	-0.18701	0.14161	-0.33447	-27.093	166.2318	812.3447	-0.78535	0.49473	-1.2365	19.248	47.255	1308.997	-1.4679	1.0161	-1.2085
0.38	-7.0191	51.0524	782.838	-1.4766	-0.24707	-0.69336	-45.899	59.389	36.502	0.13281	0.080566	0.036621	-60.7129	66.517	17.95	0.032324	0.11504	0.075781	54.449	-71.9215	1227.945	-1.3354	1.3872	-1.5015	-43.3033	148.4191	413.6401	-0.1582	0.1123	-0.31396	-58.6379	125.986	775.488	-0.74561	0.47314	-1.1851	-15.648	37.71	1264.2995	-1.4308	0.97978	-1.1823
0.382	52.382	-14.6249	932.918	-1.6831	-0.24756	-0.73584	-29.073	54.3929	47.316	0.125	0.080566	0.036621	-54.7223	32.1879	9.5843	0.036133	0.12598	0.081543	-17.007	-59.269	1238.1781	-1.0703	1.2246	-1.4336	-43.0753	93.847	405.2607	-0.12891	0.077637	-0.28809	-38.398	139.866	791.894	-0.71592	0.45225	-1.1351	20.263	67.525	1244.8094	-1.3883	0.94453	-1.1578
0.384	48.10909	21.8043	1070.503	-2.1074	-0.19629	-0.83203	-38.539	80.834	40.904	0.10107	0.072754	0.032227	-49.676	47.7382	28.8649	0.054102	0.13349	0.092187	3.105	-46.262	1301.094	-0.76709	0.86572	-1.3315	-21.246	143.8664	379.57567	-0.11377	0.061035	-0.2793	-53.07	166.4081	744.7846	-0.68623	0.43389	-1.0759	-41.6902	132.615	1202.187	-1.3428	0.90527	-1.1348
0.386	-3.471	52.065	1164.463	-2.5234	-0.03418	-0.94336	-48.24	6.481	46.57963	0.082763	0.071289	0.030762	-60.6667	76.899	9.444	0.06875	0.14072	0.10586	-31.525	14.18	1283.5025	-0.67675	0.62451	-1.2876	-21.588	128.5399	321.248	-0.093262	0.03125	-0.25732	-85.316	141.525	710.617	-0.65146	0.41787	-1.02	-47.3524	155.5145	1188.6613	-1.3018	0.87637	-1.1123
0.388	20.5634	-1.072	1241.3451	-2.6987	0.094727	-1.0015	-11.338	32.7868	54.1729	0.069824	0.071777	0.029297	-57.657	14.3354	23.9506	0.090235	0.13213	0.11445	-61.99	-20.366	1296.8336	-0.6333	0.42822	-1.2466	-17.277	101.9886	308.2283	-0.077636	0.0080567	-0.24389	-61.1792	175.212	664.8494	-0.62246	0.3998	-0.96836	-13.556	202.644	1181.096	-1.2563	0.84766	-1.0899
0.39	24.493	31.442	1263.766	-2.9507	0.50439	-1.1128	-20.359	41.296927	17.097	0.056641	0.077148	0.027344	-46.515	48.7581	31.37	0.11377	0.12803	0.12715	-36.671	-65.377	1277.937	-0.61475	0.25732	-1.187	-26.445	154.353	265.035	-0.061035	-0.0073242	-0.22949	-82.0459	165.0804	617.965	-0.59033	0.3833	-0.91357	-54.438	196.744	1126.1547	-1.2242	0.82891	-1.0711
0.392	9.0088	-21.6283	1294.446	-3.0505	0.90892	-1.2234	-19.229	14.8939	16.8136	0.050781	0.084961	0.027832	-47.438	42.2379	21.693	0.13037	0.11768	0.13135	-94.868	-115.0682	1267.665	-0.62256	0.20313	-1.1694	-25.933	87.1882	263.372	-0.04541	-0.032227	-0.22119	-63.951	149.529	604.7004	-0.55762	0.36875	-0.86621	-21.919	147.498	1104.133	-1.1928	0.8041	-1.052
0.394	27.794	-58.979	1332.063	-3.0835	1.2642	-1.3843	2.822	75.366	15.2396	0.050293	0.1001	0.028809	-40.247	19.56218	34.3228	0.14882	0.10869	0.14649	-61.51	-192.539	1328.9815	-0.67969	0.1626	-1.1953	-9.297	86.1653	272.7655	-0.041016	-0.043945	-0.21826	-35.98	199.05	551.843	-0.52666	0.35	-0.81563	-25.764	160.353	1072.3799	-1.1646	0.78174	-1.0308
0.396	-18.959	-38.275	1339.57	-2.8301	1.5293	-1.6143	-9.379	35.898	-5.4601	0.054199	0.11157	0.028809	-26.285	86.439	23.278	0.16201	0.094238	0.15088	-53.524	-187.281	1343.8912	-0.71411	0.17701	-1.2305	-15.351	114.3482	227.86	-0.021484	-0.057617	-0.2124	-69.865	178.2019	528.0406	-0.49541	0.33516	-0.7664	-67.5262	165.502	1013.143	-1.1448	0.76221	-1.0108
0.398	-15.131	-86.1802	1342.9865	-2.5215	1.5898	-1.668	-7.991	22.16517	7.5351	0.061035	0.12354	0.036621	-36.273	39.02	14.1937	0.17334	0.08291	0.15986	-92.3759	-196.997	1344.953	-0.75	0.20801	-1.2695	-32.294	67.4176	223.546	-0.013184	-0.065674	-0.2124	-28.16	182.4651	511.4818	-0.4666	0.31709	-0.71934	-35.529	154.9702	1013.7283	-1.1222	0.74463	-0.99209
0.4	7.645	-46.866	1353.12369	-1.7085	1.5649	-1.6362	8.869	52.236	0.507999999999999	0.074707	0.13574	0.038086	-11.952	39.2674	28.5553	0.17744	0.069238	0.16035	-33.624	-213.891	1335.559	-0.80908	0.26709	-1.3013	-9.961	137.793	208.808	-0.0043945	-0.073242	-0.21289	-38.729	177.875	462.2	-0.44141	0.29834	-0.67383	-66.1239	166.8884	958.306	-1.105	0.72197	-0.96709
0.402	-19.412	-50.179	1359.4434	-1.197	1.4006	-1.5637	-11.88	3.3655	3.57	0.07959	0.14453	0.041504	-7.614	65.35	21.1109	0.17969	0.056152	0.16602	-29.65	-196.279	1329.367	-0.86328	0.29395	-1.3184	-29.149	129.356	186.723	0.0097656	-0.07373	-0.20947	-68.9667	137.521	426.542	-0.42266	0.28389	-0.62559	-67.516	117.475	908.109	-1.0817	0.70469	-0.94277
0.404	14.453	-89.245	1377.847	-0.83984	1.1514	-1.502	7.886	14.1255	38.24	0.10352	0.15283	0.059082	-22.788	5.7185	38.6358	0.18135	0.045801	0.17021	-60.16832	-221.819	1373.878	-1.0322	0.33057	-1.3555	-30.413	94.044	195.7352	0.01709	-0.076172	-0.21143	-0.674999999999997	164.0951	392.633	-0.40166	0.2667	-0.57744	-27.097	126.084	885.0216	-1.0605	0.69336	-0.92188
0.406	-28.87	-44.341	1361.581	-0.62842	0.79541	-1.4585	-6.772	29.2601	14.68921	0.11597	0.15992	0.069824	-6.448	55.914	51.3029	0.17754	0.035742	0.16211	-25.508	-189.016	1456.2244	-1.2107	0.37525	-1.3845	-26.077	136.503	151.7184	0.026367	-0.073242	-0.20947	-31.44	164.901	380.035	-0.37861	0.25068	-0.53056	-72.056	155.8752	848.685	-1.0327	0.6751	-0.89639
0.408	-99.66	-51.189	1392.316	-0.58203	0.67285	-1.4492	-37.128	7.2299	3.7827	0.12842	0.15527	0.080078	-2.344	40.952	35.278	0.18379	0.027148	0.1543	-42.0942	-135.724	1472.33149	-1.3906	0.42676	-1.4355	-38.804	65.214	152.3483	0.03418	-0.074219	-0.21045	-26.04	166.5877	373.652	-0.35391	0.24033	-0.49199	-39.313	153.9872	871.591	-1.0059	0.65664	-0.87461
0.41	-76.113	-14.54	1463.447	-0.55957	0.52197	-1.4097	-12.096	69.298	3.1154	0.14746	0.14746	0.095215	-5.696	-1.6319	53.82	0.18564	0.024707	0.14082	-37.321	-135.3345	1466.159	-1.564	0.52686	-1.5054	-25.989	87.1025	150.6863	0.047363	-0.06543	-0.20801	12.314	172.438	348.186	-0.32764	0.22314	-0.44287	-8.415	202.097	842.208	-0.97461	0.64102	-0.85586
0.412	-134.2309	50.671	1456.05799	-0.57349	0.46582	-1.385	-25.166	58.244	-5.6388	0.15527	0.13818	0.10303	-22.161	62.364	29.0573	0.18604	0.032227	0.12305	0.0174000000000003	-85.15	1451.4584	-1.6128	0.58252	-1.5327	-40.96	109.2224	119.575	0.057129	-0.059082	-0.20947	-40.7848	138.5682	326.157	-0.30313	0.20947	-0.40303	-58.608	187.1171	789.1773	-0.94004	0.61894	-0.8291
0.414	-122.643	11.344	1439.6731	-0.61426	0.42773	-1.3691	-45.488	47.9267	22.09401	0.16943	0.11426	0.11475	-41.679	11.125	16.21015	0.18779	0.036914	0.10772	-44.2028	-63.159	1424.971	-1.6309	0.64844	-1.5977	-57.611	51.514	98.3532	0.063232	-0.050049	-0.21119	-10.557	138.9024	349.059	-0.27256	0.19599	-0.3624	-3.932	174.37027	746.6138	-0.90381	0.60107	-0.79834
0.416	-132.0968	-34.697	1390.735	-0.6875	0.41309	-1.3828	-37.683	70.354	5.575	0.17944	0.095945	0.11865	-23.09	18.6627	32.622	0.18535	0.043847	0.086718	-20.2285	-67.169	1468.5566	-1.6042	0.67114	-1.6492	-37.06	102.541	91.8245	0.067871	-0.041504	-0.20947	-0.990000000000002	138.557	339.702	-0.24053	0.18076	-0.33037	-12.94	214.581	705.454	-0.86348	0.57715	-0.77519
0.418	-164.201	-96.8704	1365.449	-0.70654	0.41943	-1.396	-49.425	13.4071	10.033	0.18652	0.07959	0.12891	-30.228	52.513	14.625	0.17988	0.055176	0.065625	29.2639	-34.528	1479.94	-1.5645	0.66992	-1.6992	-57.681	85.703	83.1677	0.074707	-0.03418	-0.21338	-32.755	105.559	312.137	-0.21026	0.16465	-0.2958	-3.012	190.827	682.2698	-0.82558	0.55391	-0.74844
0.42	-114.4502	-170.373	1410.799	-0.72803	0.44189	-1.4155	-42.184	41.5351	37.1131	0.19482	0.059082	0.13379	-38.966	-1.1223	26.0505	0.16954	0.066602	0.045312	22.1516	-58.227	1475.9	-1.5566	0.64453	-1.7637	-60.039	48.9982	107.6921	0.078125	-0.029785	-0.21094	1.104	110.3902	278.8446	-0.1792	0.15283	-0.2583	19.83	207.251	655.19038	-0.78379	0.52852	-0.7207
0.422	-103.3135	-138.476	1407.997	-0.73511	0.45435	-1.4148	-47.795	55.659	24.5712	0.19141	0.059082	0.13721	-27.975	42.1195	29.3395	0.15967	0.08252	0.020508	73.6	-52.9969	1521.6695	-1.5723	0.63672	-1.8027	-42.326	111.15	95.9936	0.087402	-0.015137	-0.20605	-33.712	114.7644	234.169	-0.14687	0.13555	-0.22617	-15.177	219.562	606.8203	-0.74404	0.50732	-0.69639
0.424	-110.1525	-166.878	1400.748	-0.75635	0.46143	-1.4116	-78.38778	18.3251	27.498	0.19043	0.052734	0.13574	-21.409	44.1164	20.6086	0.15215	0.10654	-0.0037108	70.904	-31.06752	1502.826	-1.6362	0.6333	-1.8511	-59.9328	64.6171	80.9226	0.095948	-0.0095215	-0.20483	-29.809	97.701	229.8875	-0.11856	0.12158	-0.19375	4.608	169.2127	585.3982	-0.70508	0.48633	-0.66992
0.426	-47.574	-199.996	1383.842	-0.85303	0.43896	-1.4077	-30.852	73.804	29.7986	0.19214	0.048096	0.13208	-50.9137	5.53	38.5829	0.13897	0.13486	-0.031543	65.345	-70.998	1536.95	-1.7029	0.64673	-1.8904	-52.072	84.4278	91.155	0.10107	-0.0024414	-0.20117	-2.378	121.445	212.096	-0.08418	0.10557	-0.16797	25.899	176.641	552.805	-0.66455	0.45908	-0.64024
0.428	-69.515	-202.498	1364.522	-0.93164	0.42676	-1.4102	-66.1058	43.4415	19.58762	0.19238	0.05127	0.12402	-41.866	60.428	25.7856	0.13545	0.16494	-0.057714	127.664	-46.4221	1563.9078	-1.7632	0.68701	-1.9194	-58.461	100.487	62.2532	0.104	0.003418	-0.19922	-61.1981	100.5635	185.5086	-0.05166	0.088672	-0.13643	-8.628	170.0838	517.523	-0.6249	0.43135	-0.61709
0.43	-50.459	-213.82	1415.551	-1.127	0.4209	-1.4297	-64.6557	27.53	52.259	0.19824	0.057617	0.1084	-71.955	14.34608	16.1554	0.13399	0.1999	-0.086328	56.353	-68.559	1554.802	-1.8022	0.77002	-1.9507	-55.757	33.8135	55.6399	0.10303	0.0083008	-0.19775	-53.083	97.529	176.50661	-0.01709	0.072266	-0.11377	4.884	140.18186	511.2268	-0.58506	0.40244	-0.58584
0.432	-23.7	-142.356	1463.2304	-1.2601	0.43946	-1.4539	-39.785	52.0336	45.8989	0.19434	0.061523	0.099121	-57.329	14.6216	33.353	0.13232	0.23096	-0.11426	87.911	-83.097	1590.253	-1.7949	0.80176	-1.9609	-51.09	81.9352	48.3938	0.10596	0.012695	-0.18896	-56.942	126.913	161.577	0.01084	0.056446	-0.093848	-15.171	186.96	473.314	-0.54209	0.37627	-0.55869
0.434	-68.5522	-89.325	1457.727	-1.3628	0.46533	-1.4868	-61.3116	3.411	21.0369	0.19043	0.08252	0.083008	-43.748	53.836	15.513	0.13633	0.26348	-0.14727	91.016	-41.923	1567.508	-1.7539	0.82422	-1.9727	-62.7426	60.7648	39.06494	0.10571	0.010986	-0.18237	-59.949	119.419	159.26794	0.035157	0.036035	-0.069629	-20.669	153.6857	450.3215	-0.50098	0.34766	-0.52588
0.436	-26.4673	-83.095	1465.032	-1.4414	0.51172	-1.5273	-31.952	31.3877	34.0229	0.18261	0.10107	0.069824	-66.1135	-11.8991	21.4935	0.13945	0.29053	-0.16982	30.5148	-53.2669	1573.033	-1.698	0.80005	-1.9528	-45.075	21.244	65.507	0.10645	0.01123	-0.17432	-23.594	126.511	162.4243	0.059375	0.025097	-0.050489	10.352	154.619	457.0985	-0.45683	0.31572	-0.49922
0.438	-36.594	-43.488	1446.2775	-1.4722	0.52979	-1.5659	-25.542	40.5846	24.7494	0.17139	0.11816	0.049316	-60.676	29.3468	31.19062	0.1375	0.31748	-0.20264	105.237	-16.993	1572.811	-1.6523	0.76953	-1.9238	-29.512	74.91685	42.623	0.11084	0.0068359	-0.16406	-89.131	118.94	140.543	0.08252	0.017481	-0.033106	-40.221	177.137	430.915	-0.41387	0.28447	-0.47305
0.44	-18.6702	-54.263	1423.443	-1.5229	0.56494	-1.6284	-42.938	-2.047	40.608	0.16113	0.15234	0.02832	-59.3099	28.8779	3.864	0.12813	0.34346	-0.23174	67.385	-1.659	1514.3326	-1.5972	0.71924	-1.8687	-34.54	15.948	22.9802	0.1084	0.0053711	-0.16455	-61.9146	88.2771	145.6432	0.097168	0.0039063	-0.015625	-16.657	129.7298	421.463	-0.3666	0.254	-0.43711
0.442	67.0587	-65.08	1428.643	-1.5783	0.59057	-1.6873	6.708	34.2284	49.473	0.15674	0.1665	0.015137	-49.605	-21.40416	46.2136	0.11523	0.36035	-0.25586	47.604	-20.0148	1480.57485	-1.5688	0.66211	-1.8232	-29.748	30.9161	32.8182	0.10645	0.0039063	-0.14795	-44.184	95.89	115.9696	0.11553	-0.0030273	-0.0001953	-4.451	152.802	388.372	-0.3332	0.22715	-0.41738
0.444	46.708	-40.215	1425.188	-1.6387	0.61523	-1.7461	-28.308	18.3512	18.4808	0.15723	0.19824	-0.013672	-48.066	25.5346	61.6766	0.095119	0.38203	-0.27861	81.118	0.5005	1436.367	-1.541	0.60742	-1.7871	-39.82	53.5874	26.9326	0.10767	-0.003418	-0.14991	-87.557	75.2846	83.9582	0.12783	-0.0096681	0.012598	-64.3048	143.375	337.9973	-0.28564	0.18848	-0.39502
0.446	61.364	-62.0178	1436.8303	-1.7163	0.65967	-1.7964	-27.121	18.687	45.71	0.15723	0.23169	-0.038086	-50.841	-4.0237	73.5176	0.068262	0.39844	-0.30508	35.541	8.7775	1402.871	-1.4976	0.52393	-1.7427	-15.885	0.787000000000001	41.3443	0.10449	-0.0092773	-0.14258	-45.912	53.5475	89.634	0.13721	-0.012402	0.025098	-29.591	102.417	332.8515	-0.24248	0.15703	-0.36289
0.448	112.266	-60.4637	1455.412	-1.7432	0.68066	-1.8223	2.298	61.071	37.9978	0.16016	0.26123	-0.061523	-27.467	11.157	128.629	0.040136	0.40703	-0.33477	42.849	5.618	1402.8959	-1.4819	0.4917	-1.7202	-4.576	46.2419	48.8308	0.10547	-0.016113	-0.13428	-57.214	61.289	64.373	0.14483	-0.017578	0.032519	-61.4804	133.5584	288.093	-0.20606	0.12929	-0.33593
0.45	89.81	-64.248	1441.801	-1.7871	0.72656	-1.8535	-19.177	20.159353	21.7665	0.15967	0.30908	-0.10303	-46.124	57.456	154.511	0.0041995	0.42549	-0.36084	20.9415	38.4557	1375.1458	-1.4551	0.45313	-1.6973	-34.8427	24.927	24.9664	0.098633	-0.02002	-0.13086	-68.735	41.355	65.93741	0.15039	-0.016113	0.04248	-59.2303	91.381	265.7828	-0.17168	0.10352	-0.30703
0.452	100.564	-108.082	1471.5066	-1.7978	0.7539	-1.8672	-11.353	23.11216	28.5255	0.16162	0.3291	-0.12207	-73.986	16.8085	262.801	-0.034668	0.44336	-0.38965	-1.9319	43.656	1325.9144	-1.4384	0.44678	-1.688	-33.088	0.460000000000001	39.1443	0.095215	-0.025879	-0.12207	-25.863	44.7296	60.078	0.15508	-0.015625	0.047754	-34.612	90.2272	252.4577	-0.13838	0.069043	-0.27744
0.454	111.382	-80.598	1484.722	-1.7993	0.77588	-1.8706	8.428	20.649	5.981	0.1499	0.37451	-0.16553	-58.689	73.0808	388.717	-0.082422	0.44317	-0.42871	19.874	59.0346	1301.062	-1.416	0.44629	-1.6738	-13.379	60.3668	29.148	0.091552	-0.031494	-0.11376	-49.476	58.3289	53.6435	0.16172	-0.014942	0.056152	-86.3446	127.282	220.9766	-0.10742	0.044434	-0.25195
0.456	50.234	-85.833	1480.333	-1.7749	0.76611	-1.853	-15.992	-20.5828	22.4364	0.1333	0.39893	-0.20948	-66.914	80.4216	518.78	-0.13672	0.43399	-0.4748	-20.648742	94.749	1261.725	-1.3784	0.47021	-1.6636	-9.184	13.604	9.213	0.088867	-0.034668	-0.10742	-45.7577	26.119	86.674	0.15859	-0.009082	0.063574	-76.69161	89.4067	212.2509	-0.080567	0.023438	-0.23633
0.458	65.172	-70.401	1489.284	-1.7637	0.75195	-1.8398	-1.27099999999999	22.9541	31.8704	0.11621	0.42285	-0.24854	-68.182	36.3334	692.577	-0.20586	0.4164	-0.53691	-78.02	71.953	1275.8777	-1.353	0.48096	-1.6558	-22.875	23.1698	21.6832	0.086426	-0.039063	-0.092285	-9.411	43.1763	71.862	0.16084	-0.0025391	0.06748	-72.3615	133.804	197.379	-0.058593	-0.0019531	-0.22119
0.46	10.1797	-46.896	1467.2298	-1.7266	0.70703	-1.8008	-14.518	14.8071	12.0981	0.079102	0.45557	-0.29639	-40.693	80.735	846.666	-0.30293	0.39463	-0.59834	-21.488	86.375	1287.1946	-1.2866	0.49658	-1.6323	-19.305	44.528	1.553	0.090332	-0.039063	-0.086914	-50.308	53.2133	49.091	0.16064	2.2204e-14	0.083984	-80.4603	126.9721	185.942	-0.034375	-0.03125	-0.20595
0.462	42.354	-61.791	1469.05	-1.6921	0.67114	-1.7673	-23.396	-8.86841	44.7685	0.046387	0.46924	-0.3291	-63.126	62.066	969.139	-0.43945	0.36328	-0.66699	-76.325	76.691	1250.894	-1.2368	0.50049	-1.6059	-39.596	-9.06858	19.2837	0.097168	-0.041992	-0.072754	-14.819	44.9513	50.012	0.16348	0.002832	0.091992	-27.794	75.837	200.9231	-0.0097656	-0.061426	-0.19961
0.464	75.972	-52.203	1457.047	-1.6563	0.63086	-1.7383	-8.384	7.7355	56.471	-0.018555	0.48145	-0.3877	-72.449	51.948	1109.982	-0.64287	0.32627	-0.73584	-55.7119	39.481	1235.1683	-1.1992	0.49121	-1.5859	-11.05	47.3244	33.66	0.10449	-0.043213	-0.067382	-13.858	64.328	18.2326	0.17597	0.0058594	0.10478	-70.482	117.3112	172.792	0.003418	-0.092773	-0.19043
0.466	35.335	-25.164	1404.8574	-1.5957	0.57422	-1.6934	-35.156	-27.8347	59.534	-0.075196	0.47827	-0.43726	-96.164	63.789	1182.221	-0.89726	0.29473	-0.80059	-24.21	57.7025	1205.7273	-1.1577	0.4751	-1.5405	-27.908	24.4566	13.261	0.1123	-0.047363	-0.056641	-48.589	40.7959	16.9775	0.18496	0.012109	0.11026	-48.306	75.535	137.1246	0.015332	-0.11748	-0.18916
0.468	50.81	-26.2126	1355.867	-1.5581	0.54932	-1.6831	-34.74	-5.5165	112.1576	-0.14209	0.48047	-0.49707	-114.177	-22.404	1246.2304	-1.193	0.28106	-0.86152	-47.7376	66.751	1169.2735	-1.1484	0.46582	-1.5215	-59.276	-9.1135	37.1555	0.11768	-0.052246	-0.043945	20.41	39.58947	27.478	0.19727	0.0082031	0.11514	-26.94	74.3759	126.64279	0.018652	-0.14258	-0.18545
0.47	31.615	22.2522	1311.751	-1.4956	0.50684	-1.6538	-58.432	12.67856	143.414	-0.26221	0.49658	-0.58936	-95.345	-30.669	1285.541	-1.5223	0.27901	-0.92988	10.907	104.13	1172.225	-1.1265	0.45264	-1.4624	-28.833	56.848	26.7896	0.12207	-0.054199	-0.036621	-28.14	42.50752	12.183	0.21094	0.0053711	0.12061	-41.508	122.747	92.0679	0.019434	-0.15703	-0.18389
0.472	13.0314	22.743	1279.768	-1.4538	0.48706	-1.6355	-82.12	-14.1236	225.097	-0.33057	0.50439	-0.62842	-104.9592	-58.4577	1269.076	-1.8472	0.31543	-0.99756	-24.971	142.2296	1136.3551	-1.1201	0.44531	-1.4268	-61.0355	20.7547	11.686	0.1333	-0.0625	-0.029785	-40.002	10.389	25.0493	0.22178	-0.0066405	0.1248	-20.961	58.4387	111.306	0.019629	-0.16797	-0.1834
0.474	39.215	0.280000000000001	1292.3242	-1.4102	0.4834	-1.6172	-75.255	25.689	334.616	-0.50977	0.52637	-0.71973	-93.1538	-119.398	1265.121	-2.127	0.42148	-1.0574	-3.472	120.283	1113.9977	-1.1089	0.43311	-1.3784	-38.728	30.5763	27.6675	0.13819	-0.066163	-0.020508	-12.378	10.6068	13.7865	0.22637	-0.027344	0.12558	-22.05	88.015	101.045	0.016113	-0.16846	-0.17578
0.476	-7.95	14.7434	1272.256	-1.3491	0.49463	-1.5972	-97.24	21.2288	417.97	-0.67456	0.552	-0.78784	-88.815	-79.653	1250.371	-2.3444	0.61631	-1.1011	30.69431	128.27962	1105.759	-1.085	0.42188	-1.3281	-42.114	43.54	5.655	0.146	-0.077637	-0.013672	-52.104	28.9248	-2.3033	0.22481	-0.041797	0.12129	-38.859	76.7047	77.144	0.0087891	-0.16992	-0.17607
0.478	-20.1681	-4.598	1237.919	-1.3159	0.49951	-1.5854	-66.249	25.8436	573.828	-0.85986	0.59229	-0.85498	-99.813	-99.162	1232.933	-2.485	0.88193	-1.1581	-32.7996	138.0002	1061.6383	-1.064	0.41064	-1.3081	-61.3279	-8.0343	14.3268	0.15625	-0.087891	-0.0087891	6.148	27.1763	20.7044	0.2168	-0.063379	0.11543	-7.806	29.533	92.238	0.0013672	-0.16221	-0.17959
0.48	-24.7458	15.3977	1219.664	-1.2368	0.51416	-1.5679	-35.862	79.63	703.776	-1.1318	0.67773	-0.93555	-62.1758	-121.144	1225.4659	-2.4814	1.1261	-1.2423	2.414	140.438	1045.437	-1.0249	0.40283	-1.2632	-42.607	43.4209	29.2884	0.15723	-0.093262	-0.0097656	-25.538	41.622	6.6239	0.20264	-0.081543	0.10791	-29.482	80.5383	80.899	-0.00019531	-0.14658	-0.18701
0.482	-75.959	74.95	1175.998	-1.1844	0.51441	-1.5427	-113.999	61.1696	823.093	-1.2656	0.72754	-0.97656	-39.735	-117.257	1190.238	-2.2676	1.3027	-1.3047	8.598	183.484	1024.7934	-0.97729	0.40112	-1.2317	-40.36	28.9339	2.51	0.16211	-0.104	-0.011719	-65.0785	23.94	18.1535	0.18584	-0.099123	0.10557	-23.317	51.7941	84.873	0.0025391	-0.12715	-0.18809
0.484	-57.8374	55.061	1202.8459	-1.1304	0.52002	-1.521	-84.951	76.757	945.7746	-1.4961	0.86133	-1.0176	-25.048	-185.926	1178.183	-1.8387	1.3943	-1.3164	-21.654	191.185	963.969	-0.93506	0.39746	-1.2046	-42.831	5.498	21.4256	0.16284	-0.11939	-0.0083008	-16.913	14.959	32.4927	0.16104	-0.10029	0.093067	-1.974	58.572	71.69	0.0024414	-0.10059	-0.18945
0.486	-24.046	87.242	1185.2966	-1.0786	0.521	-1.48	-86.301	75.286	1003.37	-1.6326	1.011	-1.0388	-27.444	-153.165	1232.2806	-1.3637	1.4203	-1.2988	0.805999999999997	173.937	943.0689	-0.88086	0.39844	-1.1543	-32.484	56.623	15.4763	0.16846	-0.13037	-0.0039063	-46.8361	42.3405	12.017	0.14424	-0.098339	0.086426	-39.278	108.334	23.223	0.0061524	-0.072852	-0.19229
0.488	-60.1529	64.9944	1142.71	-1.0591	0.52393	-1.4526	-122.059	17.1168	1074.3734	-1.7188	1.1934	-1.0654	-46.117	-99.567	1262.5989	-0.97929	1.3781	-1.2566	-11.263	184.175	900.456	-0.85645	0.39844	-1.1309	-36.251	22.8833	2.0453	0.15723	-0.14063	-0.01123	-49.835	23.415	47.9375	0.12431	-0.087793	0.082324	-11.256	39.32661	36.5411	0.0072265	-0.051465	-0.19395
0.49	-12.728	47.08	1150.683	-1.0386	0.52393	-1.4077	-95.068	35.978	1128.801	-1.7202	1.4204	-1.1089	-51.99	-94.99	1298.651	-0.77637	1.2574	-1.1893	-16.11	161.7873	883.002	-0.81055	0.39258	-1.0879	-31.297	41.669	28.1507	0.15234	-0.14307	-0.0053711	-31.233	40.421	31.9521	0.10742	-0.068359	0.074219	-18.961	62.14	51.7361	0.017383	-0.02959	-0.19629
0.492	-28.986	83.7477	1128.49	-1.0298	0.51953	-1.3696	-92.571	2.057	1101.893	-1.6538	1.5005	-1.1401	-73.4146	-70.77	1269.648	-0.7334	1.0933	-1.1128	24.288	171.671	885.826	-0.77417	0.38086	-1.0471	-30.671	65.086	15.2945	0.1416	-0.15234	-0.0058594	-80.198	62.818	2.28	0.10039	-0.04043	0.064746	-58.766	71.878	41.0308	0.028906	-0.013769	-0.19267
0.494	-10.286	70.449	1115.328	-1.019	0.51514	-1.3354	-115.8537	-54.697	1121.383	-1.4121	1.5898	-1.1895	-69.5746	-152.316	1225.664	-0.81778	0.93164	-1.0713	-32.872	179.9492	823.2774	-0.73975	0.37158	-0.99854	-55.1616	12.1307	14.3306	0.13257	-0.15405	-0.014649	-40.103	31.4603	5.054	0.098634	-0.0098636	0.058691	-20.889	34.435	45.5548	0.040039	-0.00048828	-0.18604
0.496	37.338	98.9944	1105.865	-1.0029	0.50781	-1.2773	-79.5509	-42.084	1111.208	-1.156	1.5901	-1.1804	-43.375	-252.012	1264.523	-0.95185	0.80049	-1.0246	-14.886	151.078	794.8145	-0.7085	0.35303	-0.94287	-32.746	47.461	24.3823	0.12793	-0.15479	-0.020508	-50.035	64.21	-12.182	0.099805	0.020605	0.055176	-36.103	84.804	27.94	0.054883	0.010156	-0.17852
0.498	-9.889	128.1193	1060.7408	-0.99219	0.50195	-1.2539	-77.5628	-73.953	1107.635	-0.91748	1.5396	-1.1382	-32.496	-262.3099	1309.004	-1.1062	0.70869	-0.97881	2.903	186.2194	746.177	-0.68701	0.34473	-0.90967	-44.738	42.113	-11.9176	0.12451	-0.14453	-0.032227	-86.2236	54.1085	11.1842	0.1081	0.052441	0.051465	-56.759	41.8026	35.762	0.069043	0.013867	-0.1708
0.5	39.2013	99.3211	1030.3439	-0.96094	0.49805	-1.2012	-45.098	-64.79	1147.952	-0.73047	1.3926	-1.0586	-54.491	-327.022	1342.41	-1.2534	0.64931	-0.96026	-54.677	164.234	713.18	-0.64844	0.32813	-0.84961	-31.725	20.3975	25.1394	0.12354	-0.13672	-0.038086	-25.999	38.5398	29.5437	0.1167	0.068359	0.053711	-49.479	25.298	38.5242	0.081152	0.013477	-0.15986
0.502	25.686	139.61	1005.9043	-0.92895	0.49243	-1.1667	-8.947	-40.37935	1137.691	-0.7041	1.2974	-1.019	-9.015	-341.524	1360.797	-1.3691	0.625	-0.97266	-25.502	146.602	737.848	-0.61279	0.31543	-0.8081	9.386	74.163	27.2325	0.13184	-0.11475	-0.058105	-74.1774	60.5268	11.841	0.12412	0.089453	0.062012	-78.4058	72.499	2.4561	0.093554	0.013867	-0.14717
0.504	-14.709	159.267	979.705	-0.89795	0.48584	-1.1333	-48.305	-89.932	1129.611	-0.76904	1.1089	-0.96045	29.069	-369.049	1320.6335	-1.4461	0.64883	-1.0266	-83.4905	179.8649	700.6614	-0.5835	0.30518	-0.76514	-32.677	34.027	7.8405	0.13794	-0.094483	-0.064941	-65.299	32.8158	32.4105	0.12959	0.096484	0.070605	-55.53	11.10512	25.202	0.10156	0.010254	-0.13672
0.506	0.390999999999998	157.615	995.636	-0.85352	0.48438	-1.0859	-25.992	-98.8394	1158.6572	-0.86231	1.002	-0.93506	73.6562	-421.612	1334.1914	-1.5033	0.69697	-1.0944	-87.3848	157.5929	670.423	-0.54443	0.28467	-0.70166	-22.121	25.92455	38.734	0.14697	-0.077148	-0.077148	-19.158	45.019	32.2166	0.14053	0.096875	0.084277	-64.06	43.221	31.9375	0.11084	0.0023438	-0.1251
0.508	-42.145	179.03	962.1764	-0.83496	0.47852	-1.064	-28.364	-109.339	1168.0397	-0.95996	0.93164	-0.92188	81.6411	-360.583	1409.366	-1.5517	0.76573	-1.1678	-51.5305	171.133	640.6016	-0.52686	0.27393	-0.67578	-11.334	57.356	23.2237	0.15723	-0.070313	-0.09668	-57.2733	59.876	28.05353	0.15176	0.088086	0.093164	-86.5844	48.8556	26.531	0.12422	-0.0078125	-0.11103
0.51	-20.848	132.7376	922.1466	-0.79492	0.46973	-1.0225	-34.709	-119.889	1221.268	-1.0742	0.90332	-0.9375	37.369	-330.959	1464.97815	-1.605	0.81924	-1.2265	-98.6399	193.825	579.674	-0.49707	0.25781	-0.61328	-26.876	11.561	19.2647	0.16016	-0.062988	-0.10205	-6.7	40.797	59.209	0.15967	0.07373	0.094727	-48.289	-4.064	40.6293	0.13359	-0.014063	-0.10674
0.512	-11.179	116.951	914.089	-0.76831	0.46167	-0.98511	-35.412	-81.12	1267.081	-1.1172	0.91016	-0.95313	3.724	-322.16	1541.67	-1.666	0.85156	-1.2715	-77.232	149.7128	558.109	-0.4707	0.24414	-0.57666	-8.604	48.4392	35.6205	0.16699	-0.059082	-0.11475	-27.861	65.928	19.937	0.1668	0.055762	0.10264	-54.775	63.1321	19.738	0.14141	-0.024121	-0.10078
0.514	-37.495	155.5578	861.9035	-0.74561	0.45654	-0.94482	-70.5319	-130.426	1241.0684	-1.1655	0.95361	-1.0151	-41.05	-240.137	1556.545	-1.7342	0.8623	-1.2994	-63.361	171.654	529.36	-0.44678	0.23193	-0.53271	-25.329	44.1159	12.902	0.1604	-0.056152	-0.12817	-51.235	36.54738	25.5556	0.17813	0.042187	0.10596	-62.50724	32.247	24.535	0.1543	-0.030762	-0.092285
0.516	-6.718	136.852	856.975	-0.71484	0.44141	-0.89355	-73.383	-187.875	1267.222	-1.1987	1.0103	-1.105	-74.1794	-234.798	1540.11	-1.7832	0.86641	-1.315	-92.8788	160.778	477.301	-0.41016	0.22119	-0.47314	-48.271	12.53	30.7458	0.15527	-0.05127	-0.1333	2.646	13.4904	41.5056	0.18711	0.032812	0.1083	-35.992	19.574	45.2395	0.15957	-0.041308	-0.084864
0.518	-19.513	181.5228	828.7576	-0.70117	0.4375	-0.86719	-61.919	-225.068	1251.913	-1.2188	1.0391	-1.1484	-35.498	-194.367	1549.6286	-1.8118	0.85899	-1.3248	-61.7144	125.537	483.1083	-0.39014	0.21533	-0.4458	-15.426	65.29	39.0553	0.13867	-0.036621	-0.15283	-40.338	37.7694	14.522	0.19814	0.026758	0.10654	-64.5044	77.113	26.6196	0.16641	-0.054297	-0.077148
0.52	-52.502	161.279	769.7505	-0.66748	0.42627	-0.81982	-60.041	-326.978	1277.9326	-1.2866	1.106	-1.2378	-55.483	-128.374	1512.368	-1.8234	0.85322	-1.3382	-65.8489	166.165	450.357	-0.35547	0.20801	-0.39404	-42.542	29.7949	22.9079	0.12744	-0.030762	-0.15967	-17.946	12.362	43.594	0.20898	0.027832	0.097168	-39.553	16.12	24.851	0.16953	-0.063281	-0.070117
0.522	-26.61	115.309	760.5843	-0.63867	0.41821	-0.77808	-35.471	-340.932	1335.3359	-1.3557	1.1389	-1.2898	-78.873	-152.791	1534.984	-1.832	0.85547	-1.3652	-77.98475	147.7545	415.449	-0.32592	0.19799	-0.35498	-40.208	32.6485	45.346	0.1123	-0.01709	-0.17773	3.9	29.687	44.9076	0.22441	0.033692	0.092676	-28.638	60.499	23.4011	0.17627	-0.074707	-0.063183
0.524	-62.623	151.5899	724.49193	-0.6084	0.41016	-0.73633	-49.054	-329.779	1339.4453	-1.4331	1.1655	-1.3296	-71.404	-118.917	1581.538	-1.8555	0.88086	-1.3943	-37.564	168.643	405.6721	-0.30078	0.19092	-0.32227	-42.533	60.293	21.2696	0.094727	-0.0019532	-0.19214	-54.1227	51.796	35.9165	0.23964	0.041114	0.082129	-53.629	60.196	28.6033	0.17725	-0.085938	-0.055176
0.526	-66.119	121.946	716.994	-0.56641	0.39697	-0.68359	-17.101	-345.17	1364.2328	-1.5327	1.2134	-1.3687	-74.775	-124.356	1573.088	-1.8999	0.92549	-1.4327	-62.234	195.774	364.597	-0.2666	0.17236	-0.27637	-54.739	6.087	35.8496	0.083008	0.012695	-0.20459	-14.791	21.2259	54.238	0.25293	0.047754	0.070801	-8.571	-0.4612	57.859	0.17705	-0.09502	-0.050391
0.528	-60.335	146.7493	711.093	-0.5271	0.38745	-0.64282	16.641	-256.456	1394.19	-1.5762	1.2363	-1.3867	-48.404	-179.25	1626.6217	-1.9624	0.98018	-1.4764	-36.995	126.839	370.2326	-0.25098	0.16309	-0.24658	-36.993	32.9821	40.2178	0.06543	0.033691	-0.22705	-17.496	50.559	22.793674	0.26201	0.05459	0.052734	-38.894	48.626	36.07	0.17373	-0.099317	-0.048535
0.53	-96.795	170.754	655.622	-0.49072	0.37842	-0.6001	-19.668	-246.416	1422.668	-1.6543	1.2832	-1.418	-41.499	-157.788	1648.506	-2.0277	1.0363	-1.5215	-32.12	147.949	357.46135	-0.22119	0.13525	-0.20166	-37.365	30.0176	18.3	0.05957	0.041992	-0.23389	-40.627	33.173	23.62	0.26367	0.059082	0.027344	-41.698	9.328	25.3687	0.17491	-0.10088	-0.041504
0.532	-97.708	120.3634	615.031	-0.43848	0.36719	-0.54492	-23.764	-241.205	1523.508	-1.7078	1.3152	-1.4235	-48.214	-177.296	1671.8577	-2.0776	1.0923	-1.5601	-51.2788	125.893	337.7108	-0.20507	0.11279	-0.16919	-56.8294	-1.142	40.002	0.04541	0.063477	-0.25586	-14.55	25.8109	29.3156	0.26074	0.064746	0.0015625	-2.22799999999999	5.4079	41.3232	0.17393	-0.10772	-0.035742
0.534	-83.0318	153.307	580.735	-0.41113	0.36035	-0.51367	-51.002	-181.069	1560.8095	-1.7593	1.3521	-1.4312	-62.553	-141.711	1714.103	-2.1043	1.1438	-1.5914	15.673	76.542	347.931	-0.18604	0.097168	-0.1377	-30.605	50.4488	44.519	0.026611	0.073242	-0.27222	-43.359	59.223	15.533	0.25312	0.077246	-0.020801	-15.127	65.764	24.5628	0.17236	-0.10938	-0.031738
0.536	-90.137	146.7049	545.901	-0.36182	0.34326	-0.45459	-99.0269	-192.026	1580.799	-1.834	1.3965	-1.4375	-113.652	-70.8933	1709.504	-2.1172	1.1762	-1.6125	-16.16	119.958	307.1903	-0.15479	0.080566	-0.10596	-42.9497	29.20991	17.701	0.0039063	0.08252	-0.2876	-31.283	8.575	28.3072	0.24063	0.089355	-0.039941	5.674	0.0266999999999999	30.0745	0.17236	-0.10528	-0.032324
0.538	-63.559	116.083	550.0066	-0.32568	0.31885	-0.41137	-78.095	-122.485	1631.562	-1.8706	1.4263	-1.4409	-132.497	-128.685	1725.312	-2.1168	1.2016	-1.6215	-18.496	78.627	283.1079	-0.13721	0.078613	-0.085449	-38.518	0.105799999999999	62.4949	-0.031738	0.091797	-0.31445	-11.477	19.3721	31.08216	0.22871	0.10918	-0.060938	-13.414	25.9754	17.58338	0.17314	-0.10058	-0.027051
0.54	-69.858	163.854	500.615	-0.29248	0.30029	-0.36768	-73.59	-67.052	1595.004	-1.9277	1.4854	-1.4414	-111.643	-119.4838	1747.951	-2.1006	1.2115	-1.6123	16.275	87.7792	253.9439	-0.10254	0.06543	-0.056152	-47.437	16.734	59.798	-0.069824	0.097168	-0.32129	-75.5805	33.051	17.20439	0.22266	0.14014	-0.087891	-31.171	39.53472	4.0514	0.1751	-0.093945	-0.030176
0.542	-52.4711	120.6647	465.252	-0.25488	0.26318	-0.31152	-87.324	-96.439	1596.306	-1.9654	1.5274	-1.4429	-118.522	-109.5693	1727.819	-2.0781	1.2041	-1.5879	-14.579	127.655	214.682	-0.075439	0.056152	-0.042236	-61.767	-35.28	103.561	-0.15918	0.088867	-0.34863	-32.078	8.535	44.867	0.21738	0.17539	-0.11347	1.886	-8.8292	44.5028	0.18203	-0.09082	-0.026953
0.544	-23.852	116.3872	463.405	-0.24365	0.24316	-0.28564	-76.275	-67.053	1599.546	-1.9941	1.5645	-1.4473	-72.598	-133.094	1734.403	-2.0371	1.1852	-1.5506	4.624	73.4707	221.3895	-0.045898	0.045898	-0.020996	-4.235	8.639	141.811	-0.2351	0.080811	-0.36596	-48.421	40.476	19.2092	0.21885	0.21377	-0.14375	-16.441	56.5778	55.2949	0.18896	-0.08252	-0.022949
0.546	-36.519	146.4532	418.321	-0.21094	0.20703	-0.24268	-101.6046	-117.198	1583.688	-2.0073	1.604	-1.4487	-67.191	-42.31	1669.47	-1.9832	1.1541	-1.5027	-5.135	106.005	222.9444	-0.0087891	0.030762	-0.0029297	-8.248	21.9473	152.308	-0.3252	0.062988	-0.39404	-94.3393	32.0892	19.06195	0.22471	0.25556	-0.16914	-36.312	22.677	41.317	0.1918	-0.080176	-0.024707
0.548	-22.972	91.717	418.041	-0.18701	0.1853	-0.20947	-99.37012	-156.275	1622.4699	-2.002	1.6152	-1.4492	-75.139	-40.8316	1574.994	-1.932	1.1209	-1.461	-27.657	93.8218	185.2221	0.0078125	0.021484	0.0043945	-12.288	-5.92114	232.607	-0.46826	0.027344	-0.44238	-33.724	7.5955	25.1786	0.22676	0.30127	-0.2001	-24.281	8.3108	32.8619	0.19756	-0.073339	-0.028027
0.55	-17.932	136.091	380.762	-0.16016	0.16357	-0.17773	-58.7643	-111.229	1641.62	-1.9585	1.6294	-1.4468	-47.262	-25.703	1563.436	-1.8871	1.0922	-1.425	1.708	45.209	184.0761	0.04541	0.0073242	0.021484	30.0876	53.435	323.114	-0.5542	0.01123	-0.46631	-62.7525	30.52382	7.728	0.22217	0.3457	-0.23633	-43.286	65.576	6.312	0.20264	-0.069824	-0.026465
0.552	-39.531	128.108	348.709	-0.12646	0.146	-0.13525	-55.129	-170.73	1671.5381	-1.9075	1.6214	-1.4441	-51.399	15.5552	1533.778	-1.8516	1.0762	-1.3984	-41.545	132.755	144.134	0.069336	0.0068359	0.029053	-16.6481	51.679	459.048	-0.77295	-0.024414	-0.52197	-46.4759	-13.012	47.58976	0.21885	0.38975	-0.26377	-60.1988	10.0788	9.4493	0.20244	-0.06875	-0.025195
0.554	-26.554	92.218	364.5062	-0.104	0.13721	-0.11377	-50.135	-145.413	1706.984	-1.8379	1.6055	-1.4385	-11.253	-39.562	1528.512	-1.8122	1.0726	-1.3794	-50.466	116.9216	148.2541	0.09375	-8.3267e-14	0.038574	20.842	69.2759	628.779	-0.98633	-0.046387	-0.56299	-38.279	-13.3609	57.746	0.20361	0.42617	-0.3002	-60.751	49.339	10.497085	0.20459	-0.073242	-0.024902
0.556	-4.374	144.256	330.786	-0.07666	0.11035	-0.072754	-51.624	-108.628	1658.9518	-1.7324	1.5781	-1.4141	-0.350999999999999	12.0717	1526.182	-1.7781	1.0735	-1.3638	-27.342	120.969	148.3854	0.11914	-0.012207	0.052246	73.071	81.532	764.072	-1.2358	-0.060547	-0.60645	-93.75646	18.343	65.843	0.18369	0.46406	-0.33027	-72.2327	52.6277	-0.3552	0.2	-0.077149	-0.029883
0.558	11.789	86.6696	313.8045	-0.054199	0.092041	-0.054932	-74.548	-134.842	1654.743	-1.6836	1.5605	-1.4063	-26.991	36.244	1466.514	-1.7406	1.0812	-1.3514	-55.5144	149.871	111.023	0.12842	-0.011719	0.059082	29.222	12.4929	880.528	-1.6226	-0.055664	-0.68115	-33.677	10.123	121.76008	0.1627	0.48906	-0.36445	-52.099	-4.4264	18.73872	0.19668	-0.08125	-0.027344
0.56	9.054	98.117	301.8024	-0.029785	0.078125	-0.029785	-77.451	-46.766	1669.909	-1.5854	1.522	-1.3979	-37.722	11.311	1470.136	-1.6994	1.0853	-1.3408	-59.303	72.4605	111.7707	0.14258	-0.019531	0.061523	29.013	20.506	1002.675	-1.9217	-0.008301	-0.7478	-65.762	66.081	149.901	0.13672	0.52197	-0.39404	-63.9553	51.8498	11.797	0.19199	-0.085547	-0.030469
0.562	-14.7	124.208	268.552	0.0014648	0.075684	-0.0068359	-92.9312	-50.11	1647.745	-1.5179	1.4973	-1.3836	-39.719	74.355	1453.717	-1.6563	1.0771	-1.3262	-58.8957	99.0788	94.289	0.14844	-0.010986	0.063232	41.042	15.179	1070.66	-2.2202	0.068359	-0.82178	-91.499	62.3788	238.711	0.10713	0.55713	-0.43643	-67.7331	21.144	17.637	0.18789	-0.089648	-0.033203
0.564	-8.835	67.3062	266.2216	0.018066	0.069824	-0.0019531	-70.797	-56.943	1658.602	-1.459	1.4727	-1.3652	-21.237	26.89	1430.2822	-1.6072	1.0658	-1.3055	-67.846	83.386	76.713	0.14893	-0.011719	0.070313	7.791	-19.011	1151.471	-2.5566	0.23047	-0.93848	-47.187	59.385	360.087	0.06748	0.58682	-0.48037	-39.873	16.417	31.55979	0.1875	-0.092285	-0.029785
0.566	13.668	110.7064	251.9477	0.05127	0.057617	0.018066	-51.204	-8.099	1601.386	-1.3911	1.4438	-1.3374	-6.641	-0.510999999999996	1440.1915	-1.5593	1.0456	-1.287	-77.131	37.155	83.0252	0.14893	-0.0063477	0.078613	8.955	22.609	1171.956	-2.6758	0.34863	-0.99219	-105.786	94.63	485.441	0.020606	0.61377	-0.52647	-65.926	80.7118	13.298	0.18408	-0.088769	-0.030078
0.568	-14.253	93.345	223.7517	0.074707	0.051758	0.030273	-83.415	-57.8001	1551.824	-1.3608	1.4302	-1.3179	-13.716	18.658	1414.3775	-1.5183	1.0163	-1.2663	-90.5795	104.365	54.078	0.14551	0.0039063	0.081543	-23.459	-34.496	1179.993	-2.7734	0.7002	-1.0859	-98.031	65.5274	657.01	-0.039746	0.62842	-0.59541	-45.55	29.7616	23.3814	0.18467	-0.086133	-0.037695
0.57	6.105	65.2833	221.284	0.089844	0.044434	0.035156	-62.517	-28.8633	1535.441	-1.3159	1.4009	-1.2759	-21.867	-53.489	1401.481	-1.4849	0.99092	-1.2429	-78.0019	57.398	52.411	0.15088	0.016602	0.088867	-40.919	-67.13	1215.211	-2.7478	1.0471	-1.1609	-59.329	64.63	803.868	-0.11865	0.63623	-0.67334	-43.446	44.981	31.57256	0.1878	-0.083008	-0.039649
0.572	-29.803	124.664	183.403	0.11182	0.040039	0.045898	-70.27	20.84843	1482.87	-1.2969	1.3779	-1.2451	-14.336	-1.43	1386.3276	-1.4565	0.96338	-1.2241	-42.327	57.1624	72.815	0.15967	0.031006	0.094483	-59.879	-21.0769	1236.67637	-2.6836	1.3398	-1.2832	-103.887	68.8619	930.832	-0.22686	0.62802	-0.76319	-58.8004	45.2043	13.3162	0.19239	-0.078613	-0.044726
0.574	-48.4859	79.1547	165.367	0.12207	0.039551	0.047852	-79.621	-3.7706	1485.84895	-1.2808	1.354	-1.2104	-41.054	-0.457000000000001	1345.074	-1.4271	0.94122	-1.2033	-81.5813	100.373	70.982	0.17334	0.04248	0.098633	-71.146	-58.758	1283.0265	-2.3511	1.4927	-1.4497	-91.651	37.721	1052.114	-0.3749	0.62041	-0.8542	-46.334	-4.925	30.2556	0.19775	-0.078125	-0.056152
0.576	-45.182	100.851	167.6264	0.13086	0.039551	0.050781	-32.855	58.535	1477.083	-1.2695	1.3184	-1.1709	-50.983	-41.78	1324.219	-1.3913	0.91729	-1.1851	-56.282	43.586	71.436	0.18994	0.058594	0.099121	-44.585	-61.456	1306.845	-2.0449	1.4688	-1.4688	-106.316	54.7629	1135.01	-0.58506	0.61065	-0.94365	-50.902	67.362	22.3088	0.20381	-0.074414	-0.061328
0.578	-69.9242	131.679	138.864	0.13305	0.037109	0.055664	-53.038	30.2096	1427.238	-1.2534	1.3071	-1.1499	-27.13	29.789	1275.5966	-1.3476	0.89542	-1.1632	-53.325	84.644	77.2545	0.19775	0.062988	0.099121	-66.361	-65.932	1268.8557	-1.3438	1.2891	-1.4063	-143.1174	30.19	1170.3126	-0.8459	0.5957	-1.0348	-40.306	44.01542	14.006	0.20713	-0.070508	-0.070411
0.58	-56.896	65.2575	152.367	0.12988	0.035156	0.060059	-57.899	9.8985	1443.5144	-1.2236	1.2773	-1.1152	-48.582	26.518	1224.5111	-1.3007	0.87627	-1.1448	-75.2786	78.0049	46.7411	0.21924	0.058594	0.10645	-64.651	-95.39	1259.556	-0.96192	1.0684	-1.3379	-74.253	-13.112	1215.212	-1.1484	0.60059	-1.0967	-19.464	29.2404	30.423	0.20362	-0.071289	-0.078613
0.582	-50.526	112.558	141.1765	0.13086	0.040039	0.0625	-45.975	62.689	1422.354	-1.1977	1.2553	-1.0932	-51.701	80.747	1226.5724	-1.2598	0.85352	-1.127	-30.396	22.4053	53.9925	0.23072	0.054199	0.10376	-68.844	-29.982	1285.4749	-0.74512	0.83789	-1.2891	-112.1792	-11.071	1186.658	-1.4732	0.62432	-1.1443	-27.81	75.292	17.593	0.19795	-0.070313	-0.091211
0.584	-55.9144	100.4938	114.6549	0.13232	0.042969	0.063965	-90.4235	12.7725	1412.7064	-1.1641	1.2402	-1.0684	-67.0377	154.011	1207.6547	-1.2219	0.83426	-1.1079	-38.222	69.6244	25.926	0.24023	0.043945	0.10059	-129.379	1.211	1321.3755	-0.65967	0.59229	-1.271	-98.0155	-79.887	1200.598	-1.7832	0.68281	-1.1871	-12.028	12.2001	26.4921	0.1875	-0.071777	-0.10449
0.586	-55.054815	67.4635	115.8616	0.13428	0.049805	0.063965	-74.589	21.9712	1420.2863	-1.1177	1.2173	-1.0444	-90.6831	111.693	1193.248	-1.1921	0.8118	-1.0889	-19.912	23.003	30.4664	0.23633	0.024902	0.098633	-145.842	20.268	1388.233	-0.6499	0.49658	-1.2612	-70.1885	-74.5487	1201.374	-2.0144	0.8125	-1.2215	0.274999999999999	48.606	42.669	0.17559	-0.072265	-0.12149
0.588	-63.017	124.908	85.8452	0.13428	0.055176	0.06543	-90.0551	40.868	1390.0303	-1.0986	1.2051	-1.0313	-91.0643	157.605	1156.923	-1.1729	0.78796	-1.0636	-3.026	30.9919	41.4789	0.23461	0.0080567	0.097898	-142.3	48.176	1362.523	-0.65674	0.37354	-1.2222	-92.457	-71.337	1178.3788	-2.1279	1.05	-1.2426	-14.092	72.267	38.8	0.15732	-0.064844	-0.1375
0.59	-72.4799	65.902	78.570285	0.13623	0.054199	0.062012	-89.3675	-20.99817	1368.37	-1.0645	1.1797	-1.0137	-89.5508	145.474	1095.4331	-1.1571	0.76083	-1.0438	-35.036	85.136	16.506	0.2207	-0.0019531	0.094238	-186.078	-43.176	1332.959	-0.6831	0.31152	-1.2124	-26.831	-99.7351	1189.18986	-2.1133	1.3438	-1.2852	-7.783	15.5289	45.087	0.14521	-0.057422	-0.15156
0.592	-61.937	67.2626	83.6041	0.14697	0.053223	0.05957	-42.235	37.0513	1332.1305	-1.0513	1.1553	-0.99414	-62.7103	121.1609	1067.55237	-1.1401	0.73486	-1.0112	-6.524	21.985	30.5619	0.19775	-0.01416	0.089844	-166.93	-110.823	1365.904	-0.72607	0.2749	-1.2095	-32.986	-70.805	1155.014	-1.9274	1.6043	-1.3613	-27.126	78.731	29.7639	0.12607	-0.039649	-0.16973
0.594	-71.128	94.7121	59.207	0.14355	0.049805	0.05957	-71.709	34.69	1275.3499	-1.0366	1.1333	-0.98193	-40.232	181.533	1029.747	-1.114	0.71088	-0.99582	0.384999999999998	47.583	17.8207	0.18311	-0.021484	0.086426	-164.097	-122.593	1362.464	-0.76758	0.27734	-1.2266	-42.06	-100.268	1151.3557	-1.6165	1.7599	-1.4269	-26.821	31.979	31.318	0.10791	-0.029297	-0.18799
0.596	-54.95	29.0398	71.92399	0.14746	0.045898	0.056641	-80.205	38.385	1263.474	-1.0176	1.1074	-0.96387	-69.8573	133.3651	999.9745	-1.0807	0.68555	-0.97576	-11.495	36.3492	16.6535	0.15967	-0.01709	0.080078	-161.419	-179.526	1397.005	-0.78955	0.30225	-1.2339	15.254	-116.286	1196.0046	-1.2305	1.8067	-1.4472	10.662	-9.2443	80.2646	0.090625	-0.0044921	-0.20528
0.598	-45.086	95.363	79.3469	0.1455	0.043945	0.052246	-53.282	103.2975	1241.609	-1.0073	1.0903	-0.94873	-47.643	124.0475	960.1792	-1.0417	0.65587	-0.95389	15.829	-27.296	44.394	0.14526	-0.012451	0.074463	-128.88	-142.449	1401.613	-0.83691	0.37012	-1.2617	-41.945	-84.764	1223.47806	-0.88457	1.7615	-1.4221	-39.343	44.2816	111.715	0.079688	0.018066	-0.22227
0.6	-45.1005	78.3976	78.1947	0.13965	0.044922	0.049805	-69.111	64.265	1223.5862	-0.97461	1.0664	-0.93164	-22.554	133.78	898.138	-1.0014	0.63007	-0.92322	-0.791	46.339	34.2411	0.13428	0	0.068359	-103.443	-170.074	1351.4519	-0.9021	0.42456	-1.284	-90.5287	-101.74	1279.936	-0.66553	1.645	-1.3589	-42.3915	-3.0396	118.9616	0.071485	0.03916	-0.2461
0.602	-23.859	28.2463	91.877	0.12744	0.03418	0.037598	-30.686	84.305	1220.448	-0.948	1.0471	-0.91675	-37.211	57.239	881.4912	-0.96289	0.60352	-0.89844	-9.256	7.7655	33.3998	0.13037	0.011719	0.061523	-87.787	-214.139	1373.0052	-0.98633	0.47461	-1.3115	-37.99	-95.78	1271.489	-0.62354	1.4575	-1.2716	-11.107	33.7861	162.1403	0.061035	0.054785	-0.26904
0.604	-28.305	71.2001	68.9431	0.12061	0.032715	0.032227	-28.869	114.6564	1171.8242	-0.92529	1.0298	-0.8999	-0.219999999999999	103.548	874.318	-0.9299	0.57405	-0.8731	-6.273	11.13921	30.5438	0.12891	0.022949	0.05957	-73.073	-172.237	1403.459	-1.1421	0.53174	-1.3491	-80.0159	-155.611	1254.289	-0.69795	1.2513	-1.1874	-33.105	86.066	206.565	0.049316	0.064941	-0.29053
0.606	-20.952	12.09	49.3874	0.10938	0.037109	0.027832	-59.327	101	1151.78	-0.89404	1.0005	-0.87744	-22.488	105.696	844.0454	-0.89287	0.5391	-0.84522	-39.292	67.285	6.478	0.14063	0.042969	0.056641	-79.794	-194.959	1454.7286	-1.2222	0.56104	-1.3726	-35.0211	-250.529	1282.43	-0.8417	1.0638	-1.1225	-6.764	49.7932	327.5918	0.024023	0.071094	-0.3124
0.608	-6.316	26.597	57.2746	0.094238	0.034179	0.021972	-67.901	192.066	1115.234	-0.87842	0.99072	-0.87256	-18.723	103.936	844.418	-0.85816	0.5119	-0.81349	-19.365	1.7671	12.1833	0.14893	0.061524	0.05127	-35.968	-163.822	1497.6	-1.3716	0.62939	-1.4194	-7.882	-272.9736	1295.788	-0.98758	0.91006	-1.0665	5.582	108.705	455.607	-0.015332	0.067871	-0.33301
0.61	3.421	66.01985	32.387	0.07959	0.035156	0.016602	-86.361	188.137	1071.959	-0.85889	0.96143	-0.84131	-1.144	177.284	781.0149	-0.82253	0.4801	-0.78284	-22.908	41.322	22.8048	0.15674	0.073242	0.054688	-29.429	-103.3028	1470.755	-1.4295	0.67017	-1.4568	-48.298	-311.057	1319.4726	-1.1284	0.7915	-1.0229	-21.3296	99.62575	610.727	-0.075879	0.055762	-0.35411
0.612	5.363	1.667	30.914608	0.0625	0.037109	0.013184	-48.7195	158.72	1058.7746	-0.8374	0.93701	-0.8208	-19.465	136.1737	725.7023	-0.7832	0.44629	-0.75488	-56.386	39.8078	7.001	0.1626	0.082031	0.062012	-50.132	-122.7052	1447.128	-1.459	0.7041	-1.502	12.656	-318.289	1337.416	-1.2613	0.73076	-1.0192	13.3432347	77.8335	762.223	-0.15225	0.026465	-0.39522
0.614	-1.773	49.2827	25.331	0.054199	0.046875	0.011719	-6.057	173.034	1019.628	-0.81836	0.91211	-0.80176	1.349	151.7	686.4448	-0.74366	0.42054	-0.72866	-43.977	-11.5009	37.845	0.16846	0.081055	0.061523	-25.673	-69.174	1443.95	-1.4409	0.73291	-1.5659	33.09	-306.582	1325.8422	-1.3577	0.71631	-1.0557	-3.502207	92.4954	854.948	-0.24561	-0.0073242	-0.43945
0.616	-7.829	34.00897	21.843	0.046387	0.052734	0.0083008	-25.963	92.643	990.62233	-0.78076	0.87549	-0.76904	22.505	180.668	632.525	-0.70199	0.38909	-0.71727	-70.7019	52.785	16.4167	0.17529	0.08252	0.064941	-33.559	-70.747	1439.612	-1.4297	0.74609	-1.5957	76.53	-351.164	1375.4808	-1.4237	0.75108	-1.1171	-6.6012	4.5233	961.6327	-0.36211	-0.045508	-0.48105
0.618	-6.825	-0.950699999999999	42.8324	0.043213	0.06836	0.0080567	3.977	99.821	970.8578	-0.76465	0.86133	-0.75781	9.621	160.1218	629.144	-0.66624	0.35919	-0.68716	-56.1811	20.2559	17.1698	0.17602	0.079102	0.074951	-7.151	-78.676	1473.2749	-1.4277	0.75977	-1.6836	108.039	-317.047	1433.3149	-1.4728	0.81699	-1.1853	-6.937	13.507	1017.4176	-0.52305	-0.083886	-0.52773
0.62	5.95500000000001	60.872	40.8343	0.043945	0.080078	0.0039063	-8.494	129.934	905.069	-0.7207	0.82422	-0.73047	22.519	199.1561	611.048	-0.63033	0.33506	-0.65569	-59.012	10.53898	20.197873	0.17334	0.074219	0.084473	17.8	-27.175	1464.873	-1.4385	0.77442	-1.75	38.2599	-302.517	1474.686	-1.5112	0.88525	-1.2446	-16.363	23.062	1039.0171	-0.72461	-0.12686	-0.58125
0.622	-21.696	12.0768	25.9925	0.057617	0.097656	0.0073242	-27.102	95.523	858.0487	-0.68677	0.79712	-0.70776	6.652	168.1425	562.597	-0.59277	0.30371	-0.62891	-79.3778	80.683	-4.292	0.16943	0.072266	0.089355	31.961	-64.0316	1446.705	-1.4609	0.78418	-1.8066	32.326	-291.95	1539.091	-1.5766	0.94219	-1.2988	-18.464	-31.916	1079.516	-0.97567	-0.15312	-0.62998
0.624	-19.562	9.9794	19.4979	0.062988	0.10449	0.0078125	27.57	141.783	820.511	-0.65186	0.77002	-0.68896	6.134	135.228	523.7385	-0.55749	0.27068	-0.60058	-68.3476	19.03504	4.985	0.16992	0.068848	0.094727	40.4138	-74.111	1464.899	-1.4839	0.79736	-1.8745	2.003	-210.216	1542.842	-1.6504	0.9912	-1.3402	-31.494	6.075	1100.433	-1.2617	-0.16162	-0.6875
0.626	-27.876	45.556	14.177	0.085449	0.11279	0.016113	10.731	127.78	798.341	-0.60156	0.72852	-0.66016	15.533	168.20527	479.285	-0.51626	0.23951	-0.5727	-61.4027	52.358	17.7062	0.16602	0.066895	0.097656	42.6602	-50.2377	1466.734	-1.4941	0.80078	-1.9004	-69.3962	-186.094	1539.12	-1.7411	1.0279	-1.3746	-43.8973	-57.981	1127.852	-1.5743	-0.12705	-0.72812
0.628	-34.937	-11.2653	15.092	0.097901	0.11401	0.025635	1.482	121.1	809.6885	-0.5791	0.70313	-0.64551	-24.63	144.1743	458.758	-0.46804	0.21043	-0.54461	-71.4416	55.8058	20.58451	0.1709	0.067872	0.095459	43.425	-119.613	1509.959	-1.4937	0.81494	-1.937	-38.684	-141.295	1539.97351	-1.816	1.0471	-1.3828	-27.832	-97.297	1157.352	-1.9109	-0.067871	-0.78965
0.63	-23.35	39.6358	21.4412	0.11182	0.11182	0.033691	21.306	172.353	769.2517	-0.53467	0.65674	-0.61084	-24.392	167.664	449.93	-0.42139	0.18931	-0.52099	-52.858	-14.7037	32.165	0.17578	0.072754	0.09375	49.1488	-89.937	1538.284	-1.49	0.80981	-1.9558	-19.29	-100.239	1505.517	-1.8613	1.0508	-1.3779	-29.035	-53.535	1160.2606	-2.2277	0.035645	-0.87519
0.632	-41.649	32.5069	0.358000000000001	0.12549	0.10645	0.049316	-43.5273	149.0452	737.23943	-0.49927	0.61303	-0.58691	-49.429	180.317	426.284	-0.37109	0.17285	-0.50195	-45.702	44.3153	18.965	0.17969	0.083008	0.085449	-2.314	-81.067	1498.932	-1.4824	0.79199	-1.9648	-49.727	-149.004	1523.494	-1.89	1.0533	-1.3689	5.861	-98.0115	1171.7957	-2.455	0.18955	-0.97219
0.634	-50.639	-14.8471	26.7696	0.13232	0.098145	0.056641	-13.497	180.809	699.663	-0.46582	0.57617	-0.55859	-79.9816	128.355	416.279	-0.32614	0.15633	-0.48155	-45.547	14.151	11.1672	0.18652	0.09082	0.081543	-16.93537	-92.41	1505.541	-1.4868	0.771	-1.9429	-13.218	-132.197	1563.999	-1.9121	1.0596	-1.3688	20.226	-65.306	1176.106	-2.5762	0.40039	-1.0684
0.636	-54.309	50.002	17.389	0.14111	0.084473	0.068848	6.472	196.509	636.783	-0.4209	0.52783	-0.53467	-56.797	138.888	405.2391	-0.27778	0.13696	-0.46087	-39.741	12.4086	28.244	0.19678	0.10938	0.064453	-3.798	-20.265	1499.6062	-1.4893	0.75391	-1.9258	-58.221	-155.316	1558.685	-1.9328	1.0694	-1.3691	-12.508	-29.5905	1147.1516	-2.5622	0.69209	-1.1384
0.638	-60.96372	-0.3194	1.762	0.14746	0.071289	0.079345	-14.235	145.9039	599.9398	-0.39941	0.50244	-0.51318	-81.75483	119.9394	385.119	-0.23437	0.12314	-0.44193	-40.678	81.847	13.8684	0.19629	0.12891	0.046387	-30.7971	-33.146	1477.4349	-1.5039	0.72949	-1.8945	-35.3144	-177.54	1591.884	-1.9655	1.0919	-1.3745	-2.76	-46.265	1189.962	-2.4682	1.0439	-1.1917
0.64	-57.726	18.0167	9.8866	0.1543	0.071289	0.085938	15.573	180.139	565.507	-0.34863	0.44922	-0.48047	-85.9305	108.101	380.109	-0.19503	0.11014	-0.42174	-21.331	17.8899	16.6815	0.19531	0.14307	0.023926	-9.024	-20.345	1470.9469	-1.5007	0.69946	-1.863	14.944	-127.297	1603.776	-2.0132	1.1196	-1.3901	-47.559	25.16	1218.57841	-2.3374	1.3606	-1.2984
0.642	-65.6961	55.3131	-3.298	0.16211	0.063965	0.087891	-28.095	163.316	544.253	-0.31152	0.41308	-0.45996	-51.564	142.8403	333.8963	-0.15918	0.089355	-0.39844	-17.144	42.438	27.2174	0.18799	0.1709	-0.0019531	5.112	20.6982	1397.185	-1.4824	0.65771	-1.8418	-28.091	-155.949	1627.9966	-2.0569	1.1454	-1.4014	-76.184	16.522	1235.8094	-2.0874	1.486	-1.4171
0.644	-64.949	-0.1813	15.03563	0.1626	0.05957	0.091797	-41.3316	145.108	535.814	-0.27881	0.37744	-0.43799	-77.10005	102.278	305.2444	-0.12438	0.07111	-0.38552	-16.98	52.9123	9.419	0.18213	0.18262	-0.01416	-28.4865	-32.606	1385.2583	-1.4414	0.5918	-1.8125	1.07700000000001	-127.834	1680.652	-2.0976	1.1764	-1.4062	-58.49	-16.16	1244.4109	-1.6602	1.4297	-1.458
0.646	-60.328	47.234	24.7095	0.16602	0.052734	0.088867	0.481000000000002	177.7568	500.68	-0.229	0.32422	-0.40137	-52.568	110.789	290.937	-0.10123	0.054667	-0.3738	-1.226	2.976	28.30038	0.16748	0.20947	-0.041504	-7.016	23.4711	1389.4743	-1.4155	0.55518	-1.8081	-48.2071	-84.039	1669.503	-2.1273	1.1897	-1.403	-86.3168	-44.102	1219.978	-1.145	1.2544	-1.3948
0.648	-65.0677	52.319	-1.958	0.16992	0.052734	0.08374	-29.905	141.051	466.568	-0.2085	0.29688	-0.38281	-50.165	116.39336	242.496	-0.074121	0.033212	-0.35939	-11.758	66.102	17.571	0.15625	0.22827	-0.071534	-27.1359	36.5444	1343.7805	-1.3691	0.51367	-1.7852	-105.06	-95.016	1686.207	-2.1345	1.1874	-1.395	-100.742	-135.4835	1222.045	-0.75957	1.0059	-1.3062
0.65	-36.206	11.7774	28.917	0.16602	0.053711	0.07373	-17.806	151.94117	445.805	-0.17383	0.25293	-0.3584	-85.33781	82.348	230.1611	-0.047565	0.014171	-0.34183	-13.524	37.1311	4.8963	0.14795	0.25293	-0.09668	-22.689	27.019	1337.209	-1.3445	0.50855	-1.7702	-69.498	-44.2583	1714.727	-2.1348	1.1777	-1.3848	-78.462	-159.634	1263.698	-0.59238	0.73867	-1.2469
0.652	-40.838	76.871	21.3193	0.15479	0.063965	0.061523	-28.691	167.442	411.184	-0.14429	0.2207	-0.34179	-56.209	113.0698	217.4083	-0.028809	-0.0048828	-0.33008	2.969	28.1584	25.8688	0.13965	0.28906	-0.13184	-9.449	88.603	1292.543	-1.3301	0.51758	-1.7617	-98.453	-52.945	1696.675	-2.131	1.1569	-1.3673	-91.5902	-169.86	1284.1411	-0.56924	0.51494	-1.2165
0.654	-47.2486	32.0814	4.2871	0.14648	0.064941	0.056641	-56.1627	140.71	408.8324	-0.11719	0.19482	-0.33008	-67.681	107.493	185.59	-0.0142	-0.015752	-0.31499	-2.825	79.036	18.19581	0.12939	0.27002	-0.16553	-47.5619	58.1785	1241.598	-1.3047	0.54688	-1.7461	-50.399	-56.281	1683.929	-2.119	1.1365	-1.3507	-69.094	-219.242	1287.605	-0.59326	0.35107	-1.1968
0.656	-21.381	36.8029	9.52	0.12354	0.087891	0.047363	-26.105	167.821	410.087	-0.07959	0.16357	-0.31396	-80.2157	102.444	197.7206	-0.005626	-0.031345	-0.30015	-2.194	13.8496	26.4421	0.1333	0.35596	-0.13525	-59.0455	61.069	1259.67	-1.2852	0.55859	-1.7354	-31.884	-13.744	1621.469	-2.1003	1.1177	-1.3303	-37.154	-193.701	1289.5617	-0.61973	0.24981	-1.1701
0.658	-10.856	68.582	-3.653	0.10742	0.10791	0.036865	-76.215	152.099	385.7348	-0.051269	0.13403	-0.28808	-42.773	130.878	187.0122	0.0041343	-0.050046	-0.28687	-9.526	47.688	33.6362	0.10449	0.37085	-0.17701	-85.496	109.073	1241.58	-1.2412	0.58105	-1.7129	-67.643	-19.5071	1560.212	-2.0739	1.1046	-1.3114	-50.7178	-205.466	1304.512	-0.6584	0.18252	-1.1746
0.66	-31.461	2.991	11.0697	0.091797	0.12793	0.024902	-44.9606	129.721	386.229	-0.03418	0.10352	-0.27002	-62.5695	89.618	156.2004	0.0067471	-0.063692	-0.27567	-39.461	65.198	26.391	0.085938	0.37891	-0.24414	-69.09	57.907	1257.775	-1.2061	0.58496	-1.6856	-24.119	15.142	1557.682	-2.0444	1.0933	-1.2866	-19.452	-211.303	1372.913	-0.68886	0.15674	-1.2105
0.662	-15.425	38.0079	23.9769	0.080078	0.15186	-0.0029297	-16.917	146.097	343.972	-0.010254	0.077148	-0.24561	-36.809	92.25	155.312	0.01123	-0.076172	-0.26807	-30.226	-10.59858	65.5907	0.088867	0.40088	-0.31787	-44.792	72.573	1249.425	-1.1675	0.57959	-1.6597	-24.824	37.011	1536.493	-1.9964	1.0997	-1.2745	-46.139	-170.175	1435.425	-0.70908	0.16885	-1.2461
0.664	4.94	49.0069	13.7585	0.076172	0.16846	-0.0092773	-43.713	129.7984	311.142	-0.0053711	0.064453	-0.24072	-17.608	93.828	135.6449	0.014446	-0.086127	-0.26689	-37.288	20.987	84.997	0.084473	0.41797	-0.35059	-40.893	62.6858	1202.15495	-1.1245	0.56689	-1.6108	-7.818	25.666	1517.9187	-1.9446	1.1079	-1.2542	-39.6748	-182.731	1447.525	-0.73193	0.20947	-1.2788
0.666	-5.921	18.90623	33.149	0.072266	0.20996	-0.041504	-5.017	139.6405	303.8475	0.0078125	0.041992	-0.23047	-28.778	66.6828	123.8879	0.021089	-0.093653	-0.26514	-45.196	-19.9742	90.9738	0.049316	0.45459	-0.40918	-36.601	29.807	1191.455	-1.1133	0.55078	-1.5928	52.7304	58.6067	1489.978	-1.8934	1.1169	-1.2374	-14.804	-130.75149	1443.908	-0.76865	0.26338	-1.3109
0.668	2.216	79.958	37.3193	0.070801	0.23877	-0.074219	-32.418	147.687	256.639	0.013428	0.028809	-0.2168	12.824	90.58064	122.0788	0.029287	-0.094041	-0.26436	-46.908	-30.452	131.3453	-0.0002445	0.47241	-0.45679	-23.939	97.4329	1169.5756	-1.0898	0.53125	-1.543	1.412	51.8506	1450.029	-1.8429	1.1235	-1.2144	-39.49	-58.529	1413.629	-0.85146	0.32529	-1.3499
0.67	-10.253	33.83	27.4842	0.064453	0.25732	-0.088379	-51.786	106.4559	254.0667	0.019043	0.013184	-0.20459	-7.97	71.8024	79.649	0.034861	-0.093948	-0.26279	-82.4337	42.7	166.186	-0.058105	0.47754	-0.50342	-36.138	93.602	1149.545	-1.0798	0.52026	-1.5046	-4.815	44.452	1473.332	-1.7886	1.1294	-1.1929	-32.620573	-59.148	1424.7834	-0.98194	0.37607	-1.3889
0.672	1.041	26.13751	46.177	0.052246	0.2915	-0.12061	-1.741	113.1189	240.863	0.026367	0.0058594	-0.19971	-1.76199999999999	29.632	102.2282	0.039063	-0.097656	-0.26465	-97.5467	12.2265	251.307	-0.15625	0.47656	-0.57422	-15.638	113.879	1137.437	-1.0718	0.51416	-1.4663	-5.886	81.548	1473.0518	-1.7325	1.1144	-1.1665	-31.123	-21.329	1435.972	-1.1384	0.41953	-1.4263
0.674	-1.16999999999999	65.59	23.5098	0.036621	0.30908	-0.14526	-40.479	91.31347	215.199	0.02832	0.003418	-0.18848	14.074	45.3002	92.7711	0.051664	-0.088573	-0.25947	-91.822	72.056	367.588	-0.22461	0.47266	-0.6123	8.247	154.8226	1089.0274	-1.0488	0.50879	-1.418	-44.291	62.51	1447.689	-1.6829	1.0897	-1.1355	-25.6142	-30.752	1440.784	-1.3047	0.46338	-1.46
0.676	-30.851	9.7937	21.6412	0.013672	0.32617	-0.16846	-27.425	93.039	218.74118	0.033203	-0.00048828	-0.18311	-28.53	31.4477	78.2135	0.054103	-0.08027	-0.25957	-126.8329	105.1647	470.738	-0.40234	0.46289	-0.70313	-26.997	101.816	1055.498	-1.0317	0.50342	-1.396	14.837	55.472	1453.541	-1.6329	1.0607	-1.0981	40.0062	-64.982	1489.504	-1.4535	0.50908	-1.5008
0.678	-18.645	49.267	39.3927	-0.022949	0.35205	-0.21436	14.49	132.046	213.69	0.034179	0.0039063	-0.18018	-14.355	55.7099	88.424	0.058009	-0.071288	-0.25488	-94.216	39.851	620.75	-0.57227	0.44482	-0.76953	-6.592	140.5419	1037.9135	-0.97998	0.50439	-1.3481	-5.429	60.805	1408.695	-1.5905	1.0239	-1.0638	57.002	-27.377	1507.196	-1.5588	0.56055	-1.5434
0.68	-11.405	36.2868	19.226	-0.04248	0.36133	-0.22998	-37.109	121.377	197.279	0.036133	0.0092773	-0.17871	-24.074	65.399	51.8488	0.06338	-0.066601	-0.25156	-69.226	96.914	746.636	-0.76465	0.43066	-0.8252	-54.209	162.501	1008.01424	-0.94116	0.49609	-1.3132	-14.787	19.815	1373.868	-1.5522	0.98779	-1.0347	60.931	-61.491	1517.812	-1.6202	0.60195	-1.5812
0.682	-34.908	-10.9829	51.0546	-0.091797	0.37451	-0.27734	-19.733	115.687	203.262	0.038574	0.023438	-0.17383	-71.498	26.5206	65.0274	0.069824	-0.0625	-0.24756	-95.8351	62.9987	857.541	-1.0444	0.45068	-0.87842	-66.289	145.94544	1026.085	-0.8999	0.48682	-1.2769	28.357	43.053	1357.3764	-1.5078	0.94627	-1.0062	71.277	-54.50416	1552.3417	-1.6517	0.63467	-1.6325
0.684	-28.829	40.5751	75.602	-0.13134	0.3833	-0.31689	-19.381	103.95	179.4637	0.037598	0.024414	-0.16504	-32.291	47.4574	58.528	0.07207	-0.055566	-0.24316	-109.7344	52.338	959.2143	-1.1929	0.47705	-0.89404	-52.086	187.133	982.848	-0.854	0.48291	-1.228	-29.163	59.809	1333.1356	-1.4727	0.90389	-0.98358	53.46669	-27.0097	1547.767	-1.6543	0.65039	-1.6875
0.686	-54.649	7.5472	108.17	-0.17334	0.39209	-0.35693	-23.509	66.296	152.699	0.04248	0.042969	-0.15771	-57.432	42.3214	34.2822	0.078711	-0.047364	-0.23828	-127.5801	95.952	992.737	-1.4663	0.56689	-0.92725	-88.937	145.0153	917.571	-0.83496	0.47363	-1.1973	-20.867	48.306	1326.439	-1.4398	0.87184	-0.96169	65.16	-62.254	1562.402	-1.66	0.67158	-1.7384
0.688	-71.587	11.8998	176.6466	-0.25049	0.39941	-0.41553	17.341	69.989	136.3385	0.045654	0.05249	-0.156	-69.37	40.366	38.9439	0.083008	-0.040333	-0.23086	-122.235	8.558	1028.55	-1.6323	0.667	-0.92529	-72.228	142.535	896.6873	-0.80127	0.46387	-1.146	8.521	72.64	1310.934	-1.4137	0.84285	-0.94149	84.136	-38.2252	1571.657	-1.6722	0.69112	-1.8096
0.69	-98.436	52.621	225.461	-0.2998	0.40088	-0.45703	-22.102	71.8483	110.951	0.053223	0.064941	-0.14893	-32.403	66.24109	30.521	0.089844	-0.0417	-0.21836	-98.572	4.592	1040.003	-1.7573	0.78662	-0.92432	-65.083	174.479	873.584	-0.78687	0.45239	-1.096	-16.351	75.698	1250.2304	-1.3926	0.81836	-0.92969	28.8041	-46.737	1579.036	-1.6894	0.71064	-1.8659
0.692	-110.9394	-4.1109	301.724	-0.41943	0.40137	-0.53467	-28.844	49.99	118.0561	0.062012	0.076172	-0.14209	-86.86307	41.2641	14.455	0.089844	-0.035645	-0.20264	-98.208	-9.266	1029.604	-1.812	0.95752	-0.94873	-109.292	129.7744	844.1777	-0.7627	0.44434	-1.0488	8.04	107.6693	1237.6872	-1.3781	0.79584	-0.9089	51.218	-63.226	1610.785	-1.7004	0.72832	-1.9164
0.694	-91.202	28.87241	408.339	-0.53272	0.39746	-0.60059	-13.486	51.5025	94.271	0.069824	0.08252	-0.1416	-69.469	51.287	18.7682	0.092871	-0.037402	-0.20137	-63.336	-80.54	1054.526	-1.7871	1.041	-0.95703	-92.909	161.2197	822.1963	-0.73145	0.42383	-0.9834	-16.226	172.361	1212.376	-1.3656	0.78147	-0.89576	30.435	-28.853	1582.119	-1.7026	0.74463	-1.9546
0.696	-82.5164	46.17	514.11	-0.66895	0.40186	-0.66211	-49.732	45.566	86.7554	0.079102	0.083496	-0.1333	-63.67	57.5162	3.017	0.097266	-0.034473	-0.18946	-63.0615	-26.367	1067.3697	-1.6602	1.1992	-0.97852	-102.6356	133.701	776.886	-0.71387	0.41602	-0.95117	-60.9927	171.083	1173.449	-1.3578	0.77598	-0.87781	48.464	-34.2631	1525.3993	-1.7034	0.75107	-1.9831
0.698	-88.587	12.352	663.745	-0.88428	0.41553	-0.73975	-9.531	49.5937	97.7851	0.089112	0.082031	-0.12769	-91.42793	23.48	11.2917	0.10039	-0.03877	-0.17695	-56.0169	-50.883	1078.736	-1.5239	1.2871	-0.9995	-105.9968	96.831	757.3439	-0.68262	0.39941	-0.88672	-34.025	177.714	1168.252	-1.3496	0.77061	-0.86634	76.725	-24.77	1497.228	-1.6852	0.74766	-1.9945
0.7	-97.7881	81.6179	765.262	-1.0029	0.42773	-0.77637	-27.546	64.186	77.6326	0.091797	0.084473	-0.12012	-48.814	27.43339	34.4895	0.10176	-0.043652	-0.16865	-24.254	-98.466	1090.7886	-1.3555	1.3223	-1.0234	-78.154	129.462	735.6207	-0.64258	0.38086	-0.81738	-79.756	162.793	1102.9645	-1.3335	0.76611	-0.85693	29.1659	17.458	1438.983	-1.6504	0.72149	-1.9988
0.702	-113.077399	49.70148	848.87	-1.2461	0.48145	-0.8418	-53.1805	49.4412	77.9057	0.098145	0.077148	-0.10156	-90.1165	29.4907	6.513	0.10303	-0.050293	-0.15283	-20.038	-79.548	1047.252	-1.0996	1.2676	-1.0215	-122.0553	129.495	685.9554	-0.62646	0.36963	-0.78857	-41.7037	116.0908	1088.9768	-1.3113	0.76652	-0.8465	44.583	16.3764	1401.033	-1.6103	0.68145	-1.9954
0.704	-96.079	37.6506	938.7356	-1.4136	0.55322	-0.88965	-27.151	55.469	64.8266	0.10059	0.07373	-0.094238	-78.6278	21.2831	15.4525	0.097169	-0.061133	-0.14697	-1.826	-138.477	1073.581	-0.99023	1.207	-1.0137	-107.659	162.722	677.679	-0.59961	0.34961	-0.71875	9.242	148.453	1065.8313	-1.2897	0.76456	-0.83195	25.42219	48.9832	1420.486	-1.5723	0.64648	-1.9844
0.706	-118.808	70.716	996.97388	-1.5566	0.64648	-0.92773	-70.5404	54.803	32.572	0.10645	0.066895	-0.081543	-34.923	50.369	12.083	0.091406	-0.073926	-0.13868	-4.442	-93.604	1116.374	-0.88232	1.0474	-0.96436	-91.7173	200.516	635.052	-0.58203	0.33423	-0.66895	-36.4413	155.9989	1001.6622	-1.2584	0.75511	-0.81706	16.2036	81.5146	1403.2839	-1.5281	0.61885	-1.9735
0.708	-122.701	1.342	1045.813	-1.6733	0.81494	-0.94873	-50.935	33.097	54.6903	0.11157	0.051269	-0.087891	-64.7163	21.9559	13.195	0.078906	-0.086817	-0.12734	-29.212	-38.313	1133.57	-0.9065	0.91626	-0.92016	-109.1596	150.77	598.606	-0.56445	0.3208	-0.61719	-6.705	158.135	965.91764	-1.234	0.74446	-0.80205	13.73654	48.847	1391.0267	-1.4894	0.60254	-1.9555
0.71	-99.128	6.824	1062.615	-1.6982	0.91992	-0.96094	-12.052	32.8997	47.74986	0.11621	0.041992	-0.074707	-45.907	24.044	32.5849	0.0708	-0.099707	-0.11807	-41.455	-80.38	1159.311	-0.97803	0.78955	-0.88818	-77.974	159.198	575.652	-0.53662	0.2998	-0.55029	-38.1324	178.816	895.77	-1.2017	0.7251	-0.77686	8.582	88.0084	1344.886	-1.4449	0.57598	-1.9352
0.712	-112.4115	-15.8063	1031.102	-1.6616	1.1353	-0.99756	-75.8212	29.491	11.615	0.12354	0.024902	-0.074219	-18.044	39.8353	8.757	0.060547	-0.10742	-0.10938	-37.735	-85.28	1127.94	-1.0996	0.65234	-0.86133	-100.3663	137.309	541.744	-0.52002	0.2915	-0.51514	-23.352	135.553	867.942	-1.1665	0.70844	-0.76142	-42.144	84.63	1295.75	-1.3927	0.55205	-1.9138
0.714	-119.5258	-80.093	1048.423	-1.5522	1.2544	-1.0454	-23.06	26.8145	26.7294	0.12939	0.016113	-0.070313	-40.039	28.2503	16.5997	0.053223	-0.11289	-0.10302	-56.471	-180.666	1100.11	-1.1548	0.60303	-0.85107	-79.596	114.353	543.0739	-0.48047	0.28516	-0.45313	32.423	128.273	879.2608	-1.1298	0.68741	-0.74163	-45.666	84.105	1329.6406	-1.3589	0.51611	-1.8882
0.716	-78.52	-46.4222	1046.0358	-1.3882	1.313	-1.0884	-50.517	41.663	4.284	0.12598	-0.0058594	-0.069336	4.465	58.5125	44.6062	0.049023	-0.11621	-0.094726	-30.914	-266.431	1133.037	-1.2559	0.54102	-0.88574	-49.783	158.0632	498.399	-0.4414	0.27661	-0.40161	-5.676	144.2586	858.5764	-1.0979	0.66105	-0.71866	-64.5381	124.184	1306.4995	-1.3341	0.46553	-1.8708
0.718	-69.979	-60.15792	1026.478	-1.0918	1.2969	-1.0879	-73.85161	32.7634	6.6988	0.12183	-0.024169	-0.066895	-14.339	63.751	6.604	0.043164	-0.11778	-0.086133	-50.142	-258.682	1173.938	-1.3081	0.54444	-0.93701	-72.496	134.6445	444.963	-0.40283	0.26074	-0.35498	15.691	127.0802	839.417	-1.0625	0.63372	-0.69914	-61.1737	65.13	1286.9113	-1.3202	0.43574	-1.8464
0.72	-43.544	-48.720543	1049.0943	-0.95508	1.2598	-1.0684	9.856	15.9543	19.254	0.11768	-0.036621	-0.0625	-20.459	43.4994	19.798	0.047754	-0.11358	-0.083789	-67.879	-296.83	1205.387	-1.3472	0.57471	-1.019	-42.617	141.595	415.04	-0.34814	0.24072	-0.2959	14.99	190.715	792.5889	-1.0195	0.60352	-0.67188	-25.968	72.7796	1281.2287	-1.305	0.41582	-1.8225
0.722	-52.56	-11.4818	1046.104	-0.79004	1.1387	-1.0029	-49.789	12.14429	-13.6712	0.10645	-0.048828	-0.054688	30.982	70.47	24.845	0.056641	-0.10742	-0.082031	-30.916	-297.242	1226.985	-1.3901	0.65479	-1.1323	-34.553	163.094	396.203	-0.31982	0.23242	-0.27344	-43.2591	199.136	737.126	-0.97291	0.57282	-0.64439	-50.146	66.48	1236.114	-1.3048	0.41484	-1.8084
0.724	-57.388	-79.479	1058.415	-0.78027	1.0083	-0.9624	-35.096	2.458	9.4257	0.10303	-0.054688	-0.056641	-22.085	40.775	15.988	0.069433	-0.098537	-0.072851	-15.821	-289.755	1218.5037	-1.4204	0.70166	-1.1831	-48.642	129.6241	397.40864	-0.26904	0.20508	-0.2251	-3.534	168.628	708.455472	-0.91943	0.5378	-0.61816	-0.763999999999996	26.964	1263.7368	-1.3008	0.43066	-1.7949
0.726	-41.941	-85.763	1078.48505	-0.83398	0.88086	-0.92578	-7.184	28.2893	11.18	0.09668	-0.056641	-0.047852	-2.021	40.936	50.543	0.081543	-0.088965	-0.067773	25.702	-326.226	1264.165	-1.4961	0.81055	-1.2559	4.225	145.505	396.1175	-0.23194	0.18335	-0.19043	-3.208	190.574	663.576	-0.86519	0.50581	-0.58887	-20.185	104.19	1233.5734	-1.287	0.45615	-1.7827
0.728	-45.91	-87.866	1111.7715	-0.94629	0.74072	-0.89307	-54.5513	49.538	13.245	0.095459	-0.058349	-0.047851	-10.312	43.553	56.5523	0.097168	-0.082324	-0.063477	12.386	-269.949	1327.683	-1.6094	0.90723	-1.3164	-22.085	129.814	359.58068	-0.19922	0.15869	-0.15479	-5.925	152.158	618.715	-0.80384	0.4727	-0.56005	-43.493	109.095	1196.5791	-1.2605	0.47695	-1.777
0.73	-64.101	-140.743	1167.067	-1.0083	0.6958	-0.87939	-12.96	43.1929	27.2278	0.098145	-0.05127	-0.044922	-32.436	20.9571	33.7025	0.11651	-0.079688	-0.054493	-56.997	-247.212	1360.836	-1.6655	0.94971	-1.3364	-45.386	106.8779	353.787	-0.15283	0.1333	-0.1167	51.54	147.0268	608.26	-0.75293	0.4375	-0.53711	26.086	125.5943	1175.604	-1.2258	0.49297	-1.7554
0.732	-76.779	-108.598	1187.96536	-1.1265	0.65771	-0.87939	-11.594	56.345	-9.3147	0.10791	-0.053223	-0.037109	16.418	36.4251	36.468	0.1333	-0.081055	-0.047852	-55.299	-239.473	1427.075	-1.7598	1.0273	-1.373	0.405000000000001	136.88	343.667	-0.12695	0.12109	-0.092285	-13.064	192.1685	564.999	-0.6964	0.40808	-0.51654	-9.792	168.28	1122.9266	-1.1929	0.50693	-1.7296
0.734	-108.3367	-136.775	1167.384	-1.198	0.67017	-0.90015	-35.198	37.8379	1.9134	0.1123	-0.05127	-0.043945	-24.1	38.371	18.0696	0.14863	-0.085059	-0.045214	-82.0478	-184.807	1454.236	-1.8074	1.0784	-1.4007	-26.186	127.6214	320.0036	-0.087891	0.10107	-0.058105	-7.006	145.452	535.9369	-0.64489	0.37357	-0.48801	-5.308	149.021	1118.649	-1.1733	0.51074	-1.6987
0.736	-87.002	-206.669	1167.412	-1.2598	0.71094	-0.92383	7.053	35.1626	18.7034	0.12598	-0.04834	-0.040527	-30.905	20.5561	26.0616	0.16025	-0.089355	-0.035937	-81.252	-193.658	1467.879	-1.8457	1.1201	-1.4277	-15.982	123.608	309.077	-0.056152	0.088379	-0.036133	19.075	180.9115	503.9011	-0.59924	0.33408	-0.45956	-6.44600000000001	193.373	1103.1657	-1.1572	0.50313	-1.6682
0.738	-71.093	-221.9525	1170.439	-1.3359	0.78418	-0.99609	-11.685	53.308	1.848	0.13599	-0.048584	-0.033691	0.433999999999997	26.2296	41.5108	0.16845	-0.097951	-0.031641	-51.846	-172.015	1476.0134	-1.8828	1.166	-1.4668	-11.575	133.758	260.3296	-0.021973	0.077637	-0.01709	-25.272	188.2259	457.317	-0.55506	0.30647	-0.43856	-24.165	216.641	1057.173	-1.1499	0.48916	-1.6229
0.74	-77.889	-301.004	1199.0188	-1.3784	0.81299	-1.0308	-2.858	39.2926	24.3462	0.1377	-0.053223	-0.033691	-62.299	15.1474	29.21356	0.17412	-0.10235	-0.025293	-91.482	-122.405	1459.464	-1.8926	1.1875	-1.4844	-56.295	89.3834	247.705	0.014648	0.062012	0.0078125	-10.88	159.03757	471.5431	-0.50879	0.27734	-0.41602	-30.969	184.1487	1043.1056	-1.1398	0.47354	-1.5745
0.742	-73.008	-302.663	1248.948	-1.4688	0.86914	-1.1094	0.713999999999999	53.011	13.76954	0.1543	-0.062988	-0.025879	-25.744	17.386	57.894	0.17871	-0.1123	-0.022461	-83.6573	-126.258	1483.984	-1.9253	1.2231	-1.5073	-29.306	104.7069	244.0594	0.037598	0.057129	0.023926	-38.745	208.724	442.377	-0.46206	0.24955	-0.38818	-23.334	215.625	1000.311	-1.1239	0.45869	-1.5313
0.744	-50.171	-262.397	1259.6	-1.5349	0.90356	-1.1647	-44.581	43.2598	5.2371	0.15234	-0.063965	-0.027832	-26.507	32.8173	47.4504	0.18389	-0.11943	-0.014355	-73.3482	-97.082	1527.041	-1.949	1.2317	-1.5173	-40.992	113.5691	216.302	0.073242	0.04248	0.039063	-49.5988	178.014	438.49252	-0.41268	0.21896	-0.362	-29.313	167.353	952.61913	-1.0957	0.44189	-1.4941
0.746	-48.079	-280.912	1287.7767	-1.5991	0.94189	-1.2124	1.889	29.132	32.8763	0.15625	-0.071777	-0.029297	-90.1618	17.1133	33.9748	0.18233	-0.12695	-0.01123	-81.374	-98.7889	1541.683	-1.978	1.2368	-1.522	-62.316	86.214	213.9965	0.090576	0.034668	0.052979	-45.498	165.954	421.518	-0.36498	0.19668	-0.33845	-23.19	163.686	948.1586	-1.0602	0.43574	-1.4534
0.748	-28.477	-231.696	1336.646	-1.666	0.99414	-1.2686	-42.172	48.558	15.6793	0.16943	-0.076904	-0.024415	-47.24	35.1848	34.4477	0.18115	-0.13515	-0.012012	-25.403	-141.231	1576.939	-2.0078	1.2344	-1.5117	-33.431	99.7055	190.9974	0.11377	0.032227	0.064453	-87.483	187.159	380.7851	-0.31194	0.1763	-0.31794	-14.624	214.354	895.6715	-1.0151	0.4251	-1.4143
0.75	-38.916	-212.155	1352.9911	-1.6929	1.0181	-1.2964	-57.511	37.5946	40.217	0.17676	-0.091309	-0.019043	-79.1722	47.499	13.5836	0.18242	-0.14092	-0.013574	-7.532	-126.71	1614.059	-2.021	1.2388	-1.5054	-67.917	95.2488	173.4452	0.13135	0.024902	0.077637	-53.1311	106.7245	361.295	-0.25488	0.15625	-0.29932	-10.446	157.018	868.4408	-0.96357	0.41885	-1.3784
0.752	-59.863	-204.432	1431.408	-1.7363	1.0723	-1.3477	-3.904	31.8102	44.8789	0.17578	-0.097656	-0.019531	-103.25	23.2193	18.9732	0.1792	-0.14404	-0.016113	-10.145	-140.24	1660.768	-2.0308	1.2349	-1.4976	-74.4985	105.84059	172.4552	0.1377	0.021484	0.080566	-27.715	134.1481	322.1655	-0.20166	0.13971	-0.28414	-24.609	183.2917	858.0028	-0.91299	0.41387	-1.3411
0.754	-97.037	-125.513	1472.3846	-1.7636	1.102	-1.3799	-52.2625	50.651	17.474	0.17529	-0.099609	-0.020508	-55.16	32.727	27.7971	0.17988	-0.14912	-0.016113	-21.325	-104.952	1705.433	-2.0153	1.2268	-1.4846	-58.1556	123.475	157.8283	0.14453	0.022949	0.09082	-93.27	133.4935	288.739	-0.14775	0.11965	-0.27021	-61.0465	172.39	801.35	-0.86475	0.40527	-1.2983
0.756	-123.05878	-120.811	1478.151	-1.7944	1.1274	-1.4058	-22.551	17.774	37.5299	0.18066	-0.10352	-0.012207	-91.6572	15.8757	4.372	0.18282	-0.14219	-0.019922	-61.76	-42.158	1687.198	-1.9858	1.2251	-1.4761	-102.9848	102.365	157.957	0.15235	0.020264	0.1001	-35.595	93.255	298.2926	-0.097398	0.10682	-0.25388	-34.926	122.256	804.33038	-0.8251	0.39356	-1.2567
0.758	-107.7081	-91.785	1529.887	-1.8359	1.1641	-1.4375	-18.348	32.3882	26.486	0.1831	-0.11059	-0.030762	-53.582	16.723	20.3417	0.18242	-0.13945	-0.026562	-49.272	-67.6619	1700.727	-1.9297	1.2158	-1.4609	-56.757	106.0709	155.176	0.15283	0.024414	0.10254	-47.043	146.1706	277.01	-0.053756	0.075627	-0.22809	-53.647	182.6211	781.4545	-0.79004	0.38174	-1.2113
0.76	-106.9937	-64.597	1517.819	-1.8589	1.1821	-1.4507	-68.6781	37.4343	30.1174	0.18018	-0.11084	-0.037109	-36.423	43.4696	6.828	0.18701	-0.13291	-0.027246	-39.012	-55.537	1708.471	-1.8945	1.207	-1.4609	-77.3745	91.4772	114.375	0.14648	0.037109	0.11084	-42.993	97.919	254.5377	-0.018555	0.050781	-0.2168	-71.039	160.8719	744.902	-0.75644	0.37549	-1.1684
0.762	-102.647	-125.757	1528.245	-1.8979	1.2368	-1.4702	-18.77	23.6042	46.717	0.18066	-0.11523	-0.039063	-59.122	13.8	12.2401	0.19189	-0.12451	-0.036621	-56.397	-70.912	1687.5573	-1.8315	1.1997	-1.4331	-59.795	65.44	98.341	0.146	0.044922	0.11865	-27.222	81.5445	235.5312	0.011207	0.024245	-0.2001	-53.9	180.213	721.064	-0.72295	0.35683	-1.1175
0.764	-87.136	-110.367	1543.99	-1.9299	1.263	-1.491	-40.394	40.1586	33.8404	0.18262	-0.11572	-0.03418	-14.951	23.136	33.7211	0.19726	-0.1211	-0.047461	-9.506	-105.0793	1676.7575	-1.7905	1.1884	-1.4204	-51.492	68.699	98.271	0.14453	0.061523	0.12158	-81.1191	130.784	188.251	0.034841	-0.0072902	-0.1841	-76.9745	214.088	658.5572	-0.69043	0.33887	-1.0684
0.766	-123.0035	-125.699	1552.489	-1.9624	1.2935	-1.5054	-71.3859	29.277	32.1457	0.17773	-0.11621	-0.044922	-45.512	31.42759	13.65	0.20517	-0.11572	-0.05459	-20.282	-45.8275	1633.848	-1.7773	1.168	-1.4082	-83.06623	62.71	88.5541	0.15064	0.070068	0.13135	-45.447	94.621	195.5859	0.049699	-0.037378	-0.17237	-79.5427	170.904	623.6437	-0.65957	0.32725	-1.0182
0.768	-87.704	-134.583	1607.504	-1.9902	1.3242	-1.5176	-18.089	18.213	41.39263	0.17627	-0.10669	-0.046143	-37.046	8.014	26.6121	0.20908	-0.10947	-0.057324	-59.0342	-41.645	1595.645	-1.7676	1.1465	-1.3926	-40.112	45.343	110.236	0.16064	0.079102	0.13184	-40.396	147.337	207.9355	0.062399	-0.065908	-0.16358	-81.7331	201.807	605.132	-0.63281	0.31524	-0.96289
0.77	-58.062	-78.923	1616.55877	-2.001	1.332	-1.5176	-61.645	41.5261	11.629	0.17969	-0.10449	-0.046387	8.421	24.4835	35.108	0.21143	-0.10977	-0.0625	-32.068	-26.1632	1600.1954	-1.7593	1.1411	-1.3862	-29.051	77.083	78.3865	0.17969	0.086426	0.13721	-61.4441	138.859	179.5277	0.068359	-0.090332	-0.1543	-76.0536	174.509	568.473	-0.60859	0.30234	-0.91289
0.772	-63.769	-110.797	1633.0784	-2.0015	1.3384	-1.5151	-49.809	8.346	26.1202	0.17041	-0.099609	-0.054688	-37.734	25.8438	12.037	0.21143	-0.10889	-0.073242	-22.801	13.5805	1556.332	-1.7593	1.1509	-1.3813	-56.9383	61.3335	67.0896	0.1875	0.085938	0.13965	-23.13	60.1605	165.731	0.070313	-0.10918	-0.14609	-76.413	131.829	547.3776	-0.58389	0.28574	-0.86152
0.774	-45.239	-108.354	1672.366	-1.9883	1.3291	-1.5049	-4.955	33.31	25.0793	0.16992	-0.094238	-0.058105	-7.13	20.2634	17.5451	0.20566	-0.11162	-0.080762	-6.963	-6.5447	1543.0601	-1.748	1.1592	-1.3858	-11.201	56.0629	69.8013	0.19775	0.081543	0.13867	-34.634	107.4568	127.4922	0.070798	-0.12881	-0.14336	-61.188	184.37962	502.069	-0.55908	0.26855	-0.81396
0.776	-89.811	-71.338	1658.2267	-1.9668	1.3105	-1.4893	-75.6919	26.4991	16.353	0.1665	-0.090332	-0.069824	1.566	44.243	-0.385999999999999	0.19795	-0.1126	-0.094434	7.104	45.875	1545.23	-1.7344	1.168	-1.3828	-31.58	61.9316	52.2776	0.20508	0.070801	0.14234	-25.841	72.675	116.6515	0.066895	-0.14405	-0.1418	-87.8428	148.333676	458.476	-0.53232	0.25166	-0.76006
0.778	-118.1098	-89.369	1672.631	-1.9199	1.2822	-1.4629	-24.429	-2.863	44.586	0.17334	-0.088379	-0.069825	-22.03	29.2659	13.658	0.19131	-0.10596	-0.11123	-40.966	62.807	1500.259	-1.6968	1.1802	-1.3784	-47.621	46.411	75.3509	0.20557	0.05957	0.13721	15.255	78.5252	100.9052	0.057421	-0.14941	-0.14189	-52.429	165.334	454.1313	-0.50391	0.2332	-0.71055
0.78	-101.006	-40.738	1687.773	-1.8901	1.2681	-1.4429	-22.699	24.439	19.1039	0.1748	-0.085449	-0.08252	12.463	29.97	39.6402	0.18164	-0.1001	-0.12686	-39.083	30.1677	1521.5239	-1.6812	1.1812	-1.3784	27.201	55.2476	59.9277	0.20313	0.042969	0.13721	-29.261	126.112	89.4406	0.048828	-0.1582	-0.13818	-47.251	203.987	408.534	-0.47891	0.22109	-0.66172
0.782	-107.6863	-23.908	1646.04	-1.834	1.2266	-1.415	-21.977	11.593	23.856	0.17627	-0.075195	-0.081055	-14.435	43.645	8.638	0.16895	-0.089844	-0.14063	-59.505	68.797	1507.58147	-1.6406	1.1797	-1.3652	-22.955	35.3604	43.4812	0.19971	0.034668	0.13184	-14.689	39.113	84.0651	0.033204	-0.15771	-0.13506	-60.791	131.0134	401.4679	-0.44551	0.20605	-0.60918
0.784	-94.331	-57.097	1635.545	-1.793	1.2031	-1.3858	17.55	9.4037	22.7354	0.17383	-0.072754	-0.083008	1.073	26.511	16.3294	0.15664	-0.075391	-0.15732	-72.721733	16.542	1482.2607	-1.612	1.1721	-1.3508	-9.467	22.3856	48.9084	0.18018	0.019531	0.12207	-3.963	52.94249	71.1038	0.017774	-0.15137	-0.13448	-31.349	174.981	403.3203	-0.41211	0.19678	-0.56055
0.786	-90.462	-21.524	1575.979	-1.752	1.1836	-1.3691	-37.116	31.6663	-5.674	0.16797	-0.06543	-0.093262	17.09	62.797	14.011	0.14346	-0.057325	-0.17754	-38.868	1.243	1477.7866	-1.5879	1.1504	-1.3379	16.537	47.701	22.677	0.16626	0.011963	0.11548	-50.955	44.812	73.2207	0.0076178	-0.13496	-0.1376	-38.4839	150.8834	379.0699	-0.37822	0.18672	-0.51767
0.788	-93.269	-43.37759	1522.574	-1.7109	1.1738	-1.3379	-16.774	7.092	17.6895	0.16626	-0.061279	-0.10522	-34.46	64.3332	11.5172	0.129	-0.037402	-0.19825	-45.036	26.5129	1444.78	-1.5503	1.1196	-1.3091	-39.844	40.5654	24.7587	0.146	0.0058594	0.1084	-16.867	5.01	91.324	-0.008496	-0.12002	-0.13877	-23.719	93.325	401.841	-0.33466	0.1708	-0.47354
0.79	-70.324	-35.62	1522.412	-1.6851	1.1753	-1.3354	-6.466	18.5467	11.7337	0.1582	-0.055664	-0.11084	-22.185	44.9166	35.4496	0.12129	-0.016309	-0.21563	-48.9453	1.851	1427.5044	-1.5371	1.1006	-1.293	0.088000000000001	44.784	35.2709	0.12256	0.010254	0.098145	-39.974	82.54	70.0547	-0.012207	-0.10156	-0.14111	-20.167	142.10708	352.15979	-0.29092	0.15362	-0.43408
0.792	-96.97	19.7108	1485.437	-1.6309	1.1738	-1.3164	-39.489	17.96952	9.0462	0.14648	-0.046387	-0.12305	-16.01	55.856	18.43	0.1084	0.0058594	-0.2334	-48.5629	35.8809	1406.4505	-1.4995	1.0532	-1.2593	-36.486	38.264	7.702	0.11182	0.01416	0.104	-51.555	53.96898	63.4773	-0.022461	-0.085742	-0.13652	-24.344	91.161	307.264	-0.24688	0.13906	-0.39307
0.794	-92.022	-36.819	1479.9529	-1.5915	1.1721	-1.3049	3.133	0.5702	28.6009	0.13818	-0.040039	-0.12793	-61.7469	32.283	23.531	0.099123	0.027051	-0.25176	-62.0247	38.206	1375.2496	-1.4668	1.0176	-1.2353	-33.652	-4.1385	20.5192	0.10303	0.027832	0.088379	-36.067	43.0105	59.6173	-0.022266	-0.069726	-0.13985	8.04	99.962	291.528	-0.20313	0.12207	-0.35156
0.796	-62.015	-7.7931	1483.273	-1.5386	1.1724	-1.2905	-26.001	39.268	4.375	0.11621	-0.027344	-0.14014	-41.723	26.52395	43.3177	0.091699	0.047266	-0.26435	-27.215	11.739	1370.439	-1.4375	0.98389	-1.208	-11.668	8.6579	25.4	0.10059	0.042236	0.085449	-67.1986	80.02	25.22	-0.014063	-0.051757	-0.13829	-14.634	128.6339	245.9149	-0.1666	0.10537	-0.31328
0.798	-75.363	-2.4464	1444.119	-1.4844	1.1602	-1.2656	-23.834	28.993	7.0825	0.092773	-0.010254	-0.14966	-65.914	34.65	32.473	0.076465	0.06836	-0.28193	-26.179	68.518	1341.90165	-1.3984	0.9375	-1.1758	-47.908	18.4149	3.025	0.10205	0.059082	0.080078	-36.129	0.988999999999997	37.733	-0.0085936	-0.038965	-0.13389	-27.127	68.131	241.5451	-0.13486	0.0875	-0.27735
0.8	-63.833	-25.7205	1447.1776	-1.4604	1.1528	-1.2534	5.35599999999999	25.0936	20.4663	0.074707	0.0048828	-0.15332	-83.18404	22.44431	40.4309	0.061719	0.085157	-0.29746	-25.207	64.05	1315.5887	-1.3823	0.92139	-1.1558	-18.679	12.8091	23.4925	0.11279	0.071777	0.071289	-56.699	30.4787	31.6532	0.0024414	-0.026367	-0.12842	-10.606	107.66	228.409	-0.11065	0.071875	-0.24102
0.802	-77.864	46.675	1432.9208	-1.4194	1.1313	-1.23	-50.7786	52.055	-10.989	0.038086	0.026855	-0.16504	-22.535	39.038	40.166	0.044434	0.098145	-0.31055	-28.177	103.757	1308.16812	-1.353	0.8833	-1.1206	-44.033	36.93	3.12	0.12305	0.083984	0.074219	-77.191	49.059	16.115	0.010644	-0.016992	-0.12422	-22.654	101.1398	203.691	-0.087793	0.05127	-0.20684
0.804	-108.919	25.66455	1410.5431	-1.3987	1.1116	-1.2097	-22.217	15.746	11.8721	0.015381	0.047364	-0.17871	-80.108	37.219	66.901	0.027539	0.10547	-0.32051	-48.7294	173.477	1265.6009	-1.3278	0.85961	-1.0935	-87.7949	31.5982	6.6386	0.13818	0.096191	0.076172	-37.439	2.506	19.189	0.024023	-0.011719	-0.11953	-21.747	80.146	213.8895	-0.064941	0.032227	-0.1709
0.806	-89.389	15.3162	1406.4925	-1.3789	1.0879	-1.1875	3.459	21.6748	8.9333	-0.003418	0.057129	-0.18701	-53.5211	31.5239	140.3392	0.0031249	0.10986	-0.34112	-43.655	154.047	1261.453	-1.3066	0.83496	-1.0635	-20.63	28.9778	28.1502	0.1521	0.099368	0.079345	-62.396	62.5116	2.093	0.039258	-0.014844	-0.11289	-8.883	135.41	187.5278	-0.041895	0.029101	-0.14921
0.808	-99.11732	38.288	1351.952	-1.353	1.0532	-1.1567	-64.4647	43.4647	3.201	-0.036133	0.072266	-0.20313	-24.17	51.7272	176.655	-0.026953	0.11025	-0.35908	-27.998	186.472	1226.467	-1.2808	0.80127	-1.0308	-41.135	47.45	1.8529	0.16553	0.10156	0.084961	-77.4732	23.071	12.6486	0.060547	-0.01709	-0.104	-38.113	105.172	161.3818	-0.017676	0.020703	-0.12461
0.81	-81.327	-32.574	1343.80571	-1.3335	1.0376	-1.144	-4.47799999999999	19.62443	32.2673	-0.057129	0.07959	-0.21924	-47.5181	37.129	252.8502	-0.069629	0.10088	-0.3791	-27.489	188.067	1157.591	-1.2612	0.79346	-1.0161	-72.0609	23.6567	24.7275	0.17236	0.089844	0.092285	-45.34	6.0476	16.3732	0.07959	-0.016602	-0.092285	-47.134	136.93	159.7201	0.0088865	0.016797	-0.10273
0.812	-52.869	10.623	1318.9503	-1.2905	1.0015	-1.1206	-36.286	54.021	15.824	-0.099609	0.081055	-0.24219	-1.835	41.1274	393.149	-0.12793	0.081055	-0.39844	3.116	143.621	1159.4005	-1.2266	0.76904	-0.97949	-44.181	36.016	26.6638	0.17334	0.080078	0.090332	-67.815	69.663	-3.567	0.095801	-0.022364	-0.079297	-54.9173	165.219	144.5021	0.033691	0.016406	-0.084375
0.814	-73.084	47.6156	1265.8233	-1.2476	0.96143	-1.0952	-61.8417	26.5189	46.0904	-0.14942	0.070801	-0.26319	-32.7157	85.076	505.001	-0.21396	0.052051	-0.42774	-10.621	192.728	1128.1593	-1.1943	0.74609	-0.95508	-85.7651	42.3538	-3.199	0.17676	0.062988	0.095215	-53.8799	19.5745	19.3441	0.11377	-0.034277	-0.071485	-52.639	85.3456	141.07344	0.056641	0.011719	-0.064941
0.816	-94.492	29.748	1269.594	-1.2241	0.9458	-1.0776	-14.599	7.9138	76.6717	-0.21338	0.064453	-0.2876	-10.96938	73.333	680.844	-0.32002	0.013477	-0.46543	-17.642	147.17138	1100.9268	-1.1563	0.72656	-0.92871	-52.369	35.5856	11.7162	0.17529	0.049805	0.098633	-53.19	65.865	21.7852	0.12666	-0.046387	-0.062109	-34.81	97.71355	138.1609	0.082324	0.014551	-0.048437
0.818	-70.954	93.5384	1244.96	-1.1772	0.91064	-1.0503	-67.1378	40.384	96.217	-0.30859	0.040527	-0.32275	70.697	75.155	792.733	-0.45439	-0.038867	-0.50215	12.266	125.507	1078.6095	-1.1064	0.70117	-0.89258	-40.909	51.167	-0.433999999999999	0.17529	0.041504	0.10596	-59.415	66.998	12.989	0.13642	-0.058691	-0.045898	-56.964	82.267	90.709	0.10752	0.017871	-0.031933
0.82	-63.907	69.8891	1211.569	-1.1469	0.88281	-1.0327	-28.228	20.7821	136.14811	-0.36279	0.024902	-0.3457	16.1402	44.611	903.95	-0.62979	-0.087697	-0.54306	-2.885	149.357	1014.998	-1.084	0.68945	-0.87695	-86.97628	37.49	14.4561	0.17139	0.034668	0.10107	-16.534	10.203	28.0687	0.15039	-0.071289	-0.029297	-67.3676	44.412	107.1526	0.13408	0.018261	-0.020215
0.822	-39.241	78.83169	1208.55764	-1.1191	0.85352	-1.0176	-13.762	39.731	164.404	-0.48975	-0.014648	-0.41602	28.1063	-3.119	1058.513	-0.84961	-0.13672	-0.58398	-2.962	116.643	987.226	-1.0352	0.6582	-0.84375	-12.8	31.8507	41.49	0.16455	0.035156	0.10498	-26.115	60.596	15.963	0.15615	-0.083496	-0.019043	-49.273	101.8472	92.239	0.15596	0.022656	-0.010351
0.824	-49.728	149.279	1173.3697	-1.0835	0.82275	-0.98975	-44.2893	60.8163	237.054	-0.62011	-0.053711	-0.47608	58.831	-7.11	1128.7546	-1.1261	-0.18252	-0.62178	17.46	169.72111	976.9593	-0.99876	0.63989	-0.81909	-44.124	53.4	6.678	0.16357	0.04248	0.091797	-26.644	31.748	15.5482	0.16523	-0.095996	-0.0061523	-66.2019	62.88502	67.6479	0.17773	0.022949	0.003418
0.826	-65.769	116.821	1178.292	-1.0635	0.80273	-0.97852	21.4908	55.1754	363.058	-0.7793	-0.088867	-0.54004	7.14	-25.64	1176.253	-1.4445	-0.21084	-0.67569	-4.117	190.017	948.8419	-0.95898	0.62207	-0.79199	-48.385	37.009142	23.5247	0.16919	0.046387	0.084228	-11.73	20.3336	33.49022	0.17344	-0.11318	0.0012695	-72.854	66.4573	79.6811	0.19638	0.029883	0.008789
0.828	-71.3391	173.823	1150.75	-1.0337	0.77197	-0.95068	13.0781	90.956	501.325	-1.0347	-0.13184	-0.63037	81.632	-32.502	1215.645	-1.787	-0.21279	-0.73936	-11.399	166.5567	934.664	-0.91211	0.58789	-0.75977	-2.785	43.419	19.9574	0.17432	0.052246	0.070313	-35.1	83.95	17.967	0.18252	-0.13057	0.010449	-46.271	95.142	54.89	0.21289	0.036133	0.014453
0.83	-77.343	179.162	1094.55	-1.0113	0.75147	-0.93457	-15.4243	85.79772	646.241	-1.1875	-0.15576	-0.67578	69.253	-21.228	1217.959	-2.1217	-0.17314	-0.8166	-20.59	200.539	901.3483	-0.88037	0.57275	-0.73975	-42.679	37.9354	12.36911	0.17725	0.062988	0.041992	-12.768	33.1567	22.69932	0.18213	-0.14746	0.01709	-61.4107	43.8389	73.2564	0.22657	0.041992	0.019922
0.832	-50.72	136.1117	1092.084	-0.98975	0.72998	-0.91162	68.355	63.5321	785.1042	-1.5137	-0.16699	-0.75439	34.6138	-64.179	1255.304	-2.4292	-0.078125	-0.91455	-18.5042	143.5114	850.844	-0.82617	0.53906	-0.70801	-2.857	27.795	37.755	0.17627	0.06543	0.030762	-2.33300000000001	61.435	23.31971	0.18438	-0.1625	0.024023	-36.457	90.508	95.6267	0.22988	0.047168	0.027539
0.834	-21.813	175.397	1049.47792	-0.96094	0.70313	-0.88477	39.236	65.079	878.717	-1.7595	-0.1167	-0.80738	62.395	-48.61	1281.863	-2.66	0.095215	-1.0119	-14.87	156.6306	837.104	-0.78027	0.51611	-0.6831	4.26	38.6377	22.182	0.17529	0.077148	0.0048828	-25.876	59.982	19.1136	0.17901	-0.17168	0.029687	-57.62	79.8519	73.4233	0.2334	0.054199	0.032227
0.836	-31.385	145.1875	1017.8104	-0.94141	0.69336	-0.86328	7.0803	26.2364	1016.0039	-1.9937	-0.025391	-0.85303	-2.932	-49.877	1292.2106	-2.8113	0.37002	-1.1035	-5.68	211.0132	768.341	-0.73633	0.49121	-0.65625	-28.544	30.6237	31.3727	0.16773	0.090087	-0.01416	-15.801	2.08784	40.1882	0.16885	-0.18301	0.036328	-60.821	48.258	75.6797	0.23222	0.053906	0.041699
0.838	-31.351	136.652	1008.2166	-0.89893	0.66748	-0.8374	32.7352	19.261	1087.351	-2.2676	0.19434	-0.91113	53.426	-75.11	1325.507	-2.9265	0.76884	-1.1999	-11.794	178.1375	735.707	-0.6626	0.45459	-0.62451	-0.345999999999997	24.74363	42.88	0.1582	0.10596	-0.041016	-23.794	57.454	29.458	0.15576	-0.19131	0.040234	-26.127	103.892	57.53	0.23418	0.060937	0.045606
0.84	-37.26	170.515	951.268	-0.86865	0.64306	-0.81348	4.595	10.766	1117.0126	-2.3667	0.34033	-0.94385	48.074	-59.179	1321.614	-3.0096	1.1569	-1.3556	-6.446	218.506	693.27	-0.63184	0.43555	-0.59814	-20.914	59.626	26.8386	0.13965	0.13037	-0.066406	-14.173	47.7554	36.4117	0.14063	-0.19336	0.042969	-32.313	59.487	18.1821	0.23183	0.062109	0.051855
0.842	-34.764	109.935	928.8356	-0.8418	0.62402	-0.78711	31.2911	-16.809	1170.702	-2.4453	0.70703	-0.99023	4.243	-71.6288	1310.84	-2.9121	1.3994	-1.5234	-23.838	194.8347	648.064	-0.57617	0.39844	-0.57227	-12.93	49.5267	33.972	0.12939	0.14404	-0.07959	-6.207	17.6856	59.16	0.12773	-0.18691	0.048438	-20.77	53.112	39.832	0.23028	0.07041	0.059473
0.844	-5.633	146.232	919.147	-0.81006	0.59131	-0.7583	20.0379	1.908	1174.162	-2.4421	1.0652	-1.0393	31.285	-42.59	1340.4656	-2.4425	1.4669	-1.5838	-34.824	142.296	639.7254	-0.52466	0.36792	-0.54565	19.175	45.147	28.379	0.11963	0.17676	-0.11279	-39.113	77.267	42.9217	0.12002	-0.17969	0.051172	-28.47	77.215	24.0194	0.22314	0.070801	0.060547
0.846	-7.772	144.3071	883.5673	-0.79248	0.57666	-0.73975	-21.01	-42.7836	1203.858	-2.4253	1.4224	-1.146	-54.408	24.572	1353.428	-1.8359	1.4158	-1.548	-13.259	191.358	602.021	-0.47754	0.33545	-0.52441	-39.836	30.3389	9.881	0.10938	0.2168	-0.146	-31.336	9.0326	30.6722	0.11494	-0.16524	0.051954	-19.352	16.19609	25.41472	0.21846	0.073633	0.070019
0.848	-37.215	136.976	871.898	-0.76416	0.53662	-0.70459	-9.811	-54.68322	1243.193	-2.271	1.7095	-1.3647	-112.6362	6.86099999999999	1406.14318	-1.3187	1.2572	-1.5035	-31.415	157.581	563.889	-0.41309	0.29932	-0.48975	-34.147	5.35	36.457	0.10596	0.23535	-0.16455	-28.902	44.8759	23.2148	0.10674	-0.14414	0.041504	-9.817	46.5931	35.1198	0.21231	0.075976	0.073242
0.85	-25.848	197.264	837.1445	-0.73682	0.50439	-0.6792	-55.677	-21.531	1237.75941	-2.0796	1.7563	-1.4507	-78.927	-2.107	1384.798	-0.97893	1.0185	-1.4691	-22.995	178.488	545.938	-0.38037	0.27881	-0.47363	-15.347	30.44099	28.36	0.097656	0.26758	-0.20703	-49.1079	62.93	19.036372	0.10693	-0.12695	0.037598	-12.96	27.0499	27.146	0.20449	0.069727	0.072071
0.852	-63.4702	173.736	791.6523	-0.70605	0.47852	-0.6543	-20.135	-69.452	1272.013	-1.5679	1.7349	-1.4976	-114.294	-66.57	1352.233	-0.79541	0.75537	-1.4331	-45.973	211.292	509.506	-0.32031	0.2373	-0.44385	-53.165	31.963	35.3089	0.089844	0.29688	-0.23804	-38.864	5.0011	57.328	0.11514	-0.11201	0.034668	-22.501	-17.324551	53.5335	0.19775	0.069141	0.077539
0.854	-36.92	169.20824	777.419	-0.67188	0.44189	-0.62402	21.172	-64.457	1283.772	-1.229	1.6206	-1.4448	-125.835	-136.198	1387.942	-0.72979	0.54463	-1.4116	-54.663	148.9774	502.7319	-0.27441	0.21216	-0.42016	-33.588	32.8084	40.2834	0.081543	0.32666	-0.27246	-43.379	49.324	48.1024	0.11895	-0.095606	0.026563	-17.792	35.2111	45.3573	0.18896	0.069824	0.080566
0.856	-25.791	182.7385	730.8727	-0.64697	0.42334	-0.60596	-55.54	-56.881	1267.2254	-0.9917	1.438	-1.3706	-114.268	-135.928	1406.031	-0.70537	0.39951	-1.3757	-21.676	175.848	486.1845	-0.22656	0.18652	-0.39941	-51.281	46.811	16.568	0.057129	0.36523	-0.32324	-60.0601	12.082	30.7005	0.12441	-0.078027	0.017969	-24.298	14.2682	18.0535	0.17549	0.064746	0.081738
0.858	-30.852	114.744	695.8755	-0.60498	0.38916	-0.56787	-48.687	-48.624	1308.8786	-0.85645	1.0977	-1.3047	-152.276	-178.478	1435.4435	-0.70576	0.31474	-1.3386	-42.1731	154.9725	444.2144	-0.17285	0.14795	-0.37354	-56.844	20.9	6.984	0.048828	0.38037	-0.34717	-44.258	-10.9426	41.7123	0.12842	-0.069532	0.013867	-19.569	21.8095	37.538	0.16309	0.059375	0.079688
0.86	-4.996	163.0405	664.263	-0.57544	0.36426	-0.54761	-81.055	13.949	1327.781	-0.83105	0.91992	-1.2676	-95.1161	-178.181	1437.997	-0.7336	0.25351	-1.3309	-36.009	116.9736	448.867	-0.14551	0.12793	-0.36279	-18.532	30.5386	36.0164	0.031738	0.41846	-0.38916	-77.9938	50.7017	30.58318	0.13232	-0.055664	0.013184	-13.978	55.89	31.0718	0.14668	0.060547	0.082812
0.862	-25.394	166.09	628.153	-0.54199	0.33789	-0.51563	-135.7391	26.347	1381.547	-0.83252	0.67529	-1.2202	-81.6137	-169.765	1387.875	-0.77393	0.22949	-1.3535	-10.553	159.983	411.3503	-0.094238	0.09375	-0.32617	-64.8148	21.74543	47.1445	0.012939	0.44434	-0.42627	-76.5787	-6.8522	32.986	0.13467	-0.043359	0.0044922	-49.815	-1.0799	18.8653	0.12881	0.056153	0.077246
0.864	-32.558	143.612	632.3962	-0.48584	0.31689	-0.49561	-111.47	26.288	1393.99	-0.85205	0.58301	-1.1987	-93.6165	-226.044	1407.992	-0.80459	0.25166	-1.382	-28.232	114.4141	353.6196	-0.064453	0.065185	-0.31176	-51.8318	-23.5411	89.1106	-0.0097656	0.47803	-0.45654	-53.578	29.2691	30.8856	0.13164	-0.034668	-0.00068358	-10.884	39.6885	24.4472	0.11816	0.056152	0.080078
0.866	-17.851	177.41345	573.023	-0.4624	0.30371	-0.48193	-134.3755	-7.943	1344.563	-0.87695	0.53906	-1.2012	-56.888	-193.412	1469.987	-0.81152	0.2917	-1.4023	-16.785	125.873	333.2526	-0.031738	0.038574	-0.29541	-52.948	-15.2884	85.845	-0.053711	0.51318	-0.50732	-61.7608	52.5925	-1.909	0.13125	-0.030371	-0.0026367	-33.15	39.9506	12.269	0.10821	0.059765	0.07998
0.868	-37.812	131.871	540.3785	-0.42041	0.26904	-0.44971	-161.876	-108.6327	1344.064	-0.89111	0.5625	-1.2363	-85.325	-164.848	1491.236	-0.82129	0.33857	-1.4121	-19.514	138.6574	281.119	0.003418	0.0058594	-0.27197	-81.8191	-14.1889	84.481	-0.082031	0.52344	-0.53906	-33.622	-4.1556	26.8704	0.12803	-0.022949	-0.0064453	-50.793	3.974	34.7356	0.096191	0.071777	0.084277
0.87	-28.337	141.654	520.1568	-0.39283	0.24341	-0.42603	-125.1766	-122.04	1366.185	-0.89258	0.59375	-1.2578	-49.86	-146.319	1550.945	-0.85664	0.38096	-1.4039	-34.725	76.442	278.2309	0.019531	-0.0063477	-0.26025	-27.6	-2.118055	137.523	-0.13184	0.53076	-0.61279	-47.802	44.5327	30.1168	0.12598	-0.01709	-0.0053711	-41.255	49.033	32.02855	0.096973	0.082324	0.085059
0.872	-35.653	171.573	481.5	-0.36719	0.21631	-0.39941	-141.92	-151.336	1387.71	-0.90039	0.67871	-1.2813	-19.9809	-64.356	1527.547	-0.94189	0.40088	-1.4058	-20.786	127.563	271.4368	0.04248	-0.030273	-0.24121	-79.9529	39.42	188.074	-0.18774	0.52832	-0.68506	-45.924	22.996	12.367	0.13027	-0.015625	-0.010742	-76.1127	24.5126	1.278	0.10205	0.09668	0.085742
0.874	-64.337	135.252	492.3628	-0.33691	0.18848	-0.36426	-105.8049	-166.422	1382.0133	-0.93213	0.73047	-1.2998	-54.515	-67.451	1485.34366	-1.0913	0.41006	-1.4155	-22.333	140.934	238.4332	0.061523	-0.044434	-0.22852	-95.274	28.77213	324.916	-0.27197	0.51953	-0.76367	-34.563	3.922	26.7289	0.1376	-0.013574	-0.019824	-54.993	33.633	7.2275	0.1167	0.11182	0.090332
0.876	-31.949	175.101	463.42897	-0.31592	0.17236	-0.35303	-72.263	-130.918	1343.239	-0.98779	0.77197	-1.312	-13.9976	-60.905	1510.329	-1.2616	0.43076	-1.4382	-25.693	128.111	243.4861	0.070801	-0.047852	-0.22266	-56.226	48.318	468.521	-0.45313	0.49707	-0.86719	-44.321	63.8462	21.5446	0.14541	-0.0057616	-0.02373	-49.967	68.378	1.127	0.13115	0.12754	0.088574
0.878	-50.3495	136.767	422.565	-0.2832	0.14502	-0.32764	-80.4897	-168.73	1332.233	-1.1035	0.79688	-1.3184	15.9907	-24.304	1482.935	-1.4089	0.47451	-1.4815	-19.441	179.076	220.6237	0.081055	-0.062988	-0.1958	-105.944	58.2012	595.749	-0.57129	0.48633	-0.91211	-24.73	3.549	35.0825	0.1585	0.0011719	-0.02998	-81.2317	16.252	25.4541	0.14717	0.13633	0.096973
0.88	-62.365	103.4167	418.706	-0.24926	0.1289	-0.31323	-45.223	-167.974	1388.5796	-1.1719	0.80176	-1.3184	9.549	-40.588	1503.425	-1.4965	0.51875	-1.52	-43.731	121.491	192.31541	0.080811	-0.068604	-0.18896	-34.073	16.1212	765.263	-0.87939	0.4751	-0.9917	-18.173	20.2134	28.18235	0.16846	0.010254	-0.032227	-59.139	32.7355	29.7371	0.16982	0.14141	0.10166
0.882	-33.068	129.5489	386.932	-0.21533	0.1123	-0.29395	-81.052	-129.766	1422.7972	-1.3145	0.80469	-1.3242	75.71	6.775	1546.984	-1.5425	0.55908	-1.562	-32.396	119.2908	174.6538	0.08252	-0.069824	-0.18652	-8.547	34.988	890.022	-1.1675	0.49219	-1.0342	-18.916	52.4917	-5.7902	0.1789	0.015039	-0.04834	-51.181	31.2495	-2.591	0.18291	0.14482	0.10996
0.884	-47.168	101.806	360.58	-0.17578	0.081055	-0.26465	-50.283	-136.695	1439.78	-1.4026	0.81079	-1.3299	87.185	-2.587	1528.021	-1.5777	0.5752	-1.6125	-37.808	141.0756	146.829	0.083008	-0.076172	-0.18604	-91.2366	48.927	1002.863	-1.4692	0.52979	-1.0698	-16.787	4.9641	7.53519	0.18642	0.016797	-0.058691	-77.0865	-0.832999999999998	24.4233	0.19434	0.14014	0.12109
0.886	-28.802	127.4706	350.3809	-0.15283	0.067383	-0.25684	-2.735	-73.972	1417.006	-1.4688	0.83203	-1.3555	83.313	-55.8403	1555.078	-1.611	0.57851	-1.6578	-49.724	83.683	157.0881	0.087402	-0.079102	-0.18604	-55.88	44.6341	1098.002	-1.8574	0.62402	-1.1055	-25.308	55.207	15.426	0.1876	0.022265	-0.067285	-30.069	51.2416	48.6848	0.20449	0.12988	0.1295
0.888	-32.692	143.285	303.44	-0.12402	0.037109	-0.22754	-52.628	-68.034	1372.3867	-1.5137	0.88281	-1.4102	125.428	-39.8362	1581.2696	-1.666	0.58359	-1.7114	-21.15	120.18975	147.8016	0.085938	-0.074219	-0.2002	-58.687	48.112	1124.6568	-2.019	0.69873	-1.1167	-32.949	28.4247	11.828	0.19091	0.023145	-0.077442	-37.491	27.65834	22.4109	0.20927	0.11611	0.14053
0.89	-49.56	85.5379	283.02403	-0.10278	0.014404	-0.20557	-19.2555	-74.407	1374.371	-1.522	0.90479	-1.4429	84.777	-75.647	1581.065	-1.7461	0.60039	-1.7726	-34.319	101.0849	113.569	0.087646	-0.070801	-0.20728	-87.438	-13.276	1169.011	-2.2026	0.88135	-1.1304	-6.12	-4.4352	23.1512	0.18115	0.026855	-0.091797	-36.106	19.64	28.739	0.20615	0.10283	0.1456
0.892	-27.206	107.439	266.0523	-0.088867	-0.0058594	-0.19189	14.101	-31.753	1371.213	-1.5234	0.96484	-1.5215	108.574	-61.171	1629.47	-1.8237	0.62939	-1.8315	-50.232	69.443	105.0744	0.085938	-0.069824	-0.21045	-44.998	-44.611	1196.623	-2.1955	1.0706	-1.1526	-13.423	59.418	13.7	0.1752	0.026758	-0.099709	-27.547	63.654	0.901	0.2041	0.087109	0.14961
0.894	-50.786	94.4698	243.236	-0.069824	-0.036621	-0.16162	-1.83499999999999	-33.915	1363.158	-1.5234	1.0063	-1.5796	84.193	-17.512	1578.214	-1.8974	0.66201	-1.8876	-37.517	115.96	84.5951	0.073242	-0.061035	-0.21387	-58.871	-50.334	1179.452	-2.1113	1.2715	-1.1855	-11.047	13.925	20.6535	0.15762	0.025782	-0.11348	-53.0197	14.4019	4.2405	0.19727	0.072754	0.15723
0.896	-52.533	96.24857	251.30379	-0.063477	-0.048828	-0.15186	72.689	-12.796	1383.9006	-1.519	1.0454	-1.6265	13.9172	-57.0112	1572.455	-1.9422	0.70957	-1.9364	-56.986	77.4197	86.8901	0.063477	-0.055176	-0.21582	-50.9946	-78.991	1210.566	-1.8394	1.4341	-1.2632	-9.98	44.2679	41.0319	0.13965	0.030469	-0.12558	-21.154	51.0552	51.3416	0.1918	0.060156	0.1582
0.898	-34.902	140.351	241.944	-0.049316	-0.071777	-0.13477	82.552	-1.80099999999999	1370.223	-1.519	1.0845	-1.6753	57.572	-19.768	1575.21	-1.9597	0.75918	-1.9804	-49.962	80.32481	123.625	0.039063	-0.043945	-0.21582	-65.7367	-52.2928	1230.88	-1.6426	1.4473	-1.293	-46.503	77.897	11.9845	0.12188	0.041895	-0.1335	-32.794	55.211	17.856	0.18935	0.057714	0.16015
0.9	-68.473	112.949	219.332	-0.04126	-0.077881	-0.12451	60.699	-67.82	1396.8274	-1.5171	1.1021	-1.6958	36.957	-24.493	1537.075	-1.932	0.7875	-2.0086	-65.5139	85.9973	88.156	0.027344	-0.031738	-0.21436	-64.0586	-86.903	1225.1121	-1.2065	1.3716	-1.2808	-16.79	23.7112	31.9261	0.10791	0.060547	-0.14307	-29.492	19.3075	11.938	0.18858	0.056934	0.15742
0.902	-45.725	120.629	206.7102	-0.02832	-0.090332	-0.11279	118.48	-42.9693	1424.1187	-1.5288	1.1196	-1.73	48.498	-31.78	1539.647	-1.8809	0.79688	-2	-60.927	26.215	83.707	0.01709	-0.016113	-0.21289	25.527	-133.833	1220.009	-0.95676	1.2571	-1.2209	-34.727	57.715	40.853	0.089844	0.07627	-0.15537	4.252	67.775	22.982	0.18643	0.058105	0.14873
0.904	-18.174	131.498	167.832	-0.01416	-0.10107	-0.09668	74.266	-58.514	1415.1704	-1.5322	1.1255	-1.748	74.428	15.6167	1492.05413	-1.8202	0.75791	-1.9654	-47	73.1702	73.6122	0.012695	0.0043945	-0.2124	9.393	-115.119	1179.79087	-0.82275	1.1226	-1.1577	-54.834	12.562	65.001	0.078516	0.091602	-0.16406	-28.083	43.677	8.681	0.18555	0.063965	0.1377
0.906	-48.793	97.2375	169.2034	-0.0053711	-0.10303	-0.1001	82.528	-81.004	1450.945	-1.5327	1.1294	-1.7612	15.4164	9.9645	1416.194	-1.7488	0.69219	-1.9203	-58.425	73.4975	50.8005	0.016602	0.010742	-0.21582	-10.797	-124.66	1208.043	-0.84375	0.92188	-1.0996	-37.597	-15.2193	107.9543	0.063672	0.10762	-0.17929	-12.479	40.9328	38.3977	0.18623	0.070508	0.12998
0.908	-8.975	124.225	167.469	0.0068359	-0.10645	-0.09375	74.983	-38.6021	1442.992	-1.5332	1.1123	-1.752	18.0641	37.5861	1399.1434	-1.6805	0.61368	-1.8613	-67.113	52.684	56.671	0.027344	0.026367	-0.20801	-5.903	-83.213	1277.255	-0.89404	0.83057	-1.0825	-59.061	50.066	113.643	0.046582	0.12461	-0.20449	-5.449	81.141	16.041	0.17685	0.077539	0.11416
0.91	-35.51	112.336	125.828	0.020996	-0.10156	-0.090088	10.3136	-44.4975	1420.247	-1.5332	1.1162	-1.7422	-4.1067	73.325	1363.6932	-1.6163	0.53115	-1.8079	-50.161	92.253	31.623	0.041016	0.035401	-0.2041	-75.238	-61.45	1277.5541	-1.0181	0.67822	-1.0444	-65.3842	7.2732	144.645	0.023438	0.14014	-0.22754	-36.825	34.2407	18.8406	0.1624	0.095117	0.099708
0.912	-61.0845	82.6837	138.28132	0.029297	-0.09668	-0.083496	41.169	-10.511	1424.438	-1.5229	1.1001	-1.7144	-27.1951	32.412	1345.822	-1.5508	0.46094	-1.7676	-68.1415	45.4994	16.115	0.055176	0.040527	-0.20264	-60.9497	-116.909	1287.1799	-1.1194	0.59106	-1.0427	-35.2077	27.533	203.618	-0.012012	0.14053	-0.24912	-4.039	53.1452	44.0662	0.14766	0.11426	0.081152
0.914	-28.491	99.6709	120.864	0.041504	-0.087402	-0.084961	37.3771	24.2479	1412.0251	-1.5073	1.08	-1.6865	10.607	55.3964	1327.9271	-1.4933	0.41181	-1.7327	-45.721	46.6627	40.7055	0.079102	0.047852	-0.19482	-11.5297	-159.954	1258.434	-1.2104	0.53564	-1.0542	-15.4819	65.926	289.163	-0.059473	0.13789	-0.27402	-29.705	36.5291	32.7139	0.12305	0.13135	0.055176
0.916	-62.591	63.605	125.4601	0.050293	-0.082031	-0.083984	25.717	5.1347	1400.439	-1.4897	1.0396	-1.6558	-21.3771	63.953	1273.686	-1.4476	0.38574	-1.7074	-13.665	56.191	32.729	0.088379	0.044922	-0.18506	-38.87474	-257.5329	1281.319	-1.3086	0.54297	-1.1152	-1.626	43.9115	454.001	-0.11338	0.12891	-0.29356	-51.755	9.022	38.4147	0.10537	0.15391	0.032129
0.918	-35.055	70.369	136.955	0.065918	-0.067383	-0.087891	67.568	35.3284	1368.852	-1.4551	0.98047	-1.6211	-73.013	37.9372	1268.837	-1.4117	0.37715	-1.6871	-45.22	-0.203000000000001	45.4337	0.10596	0.038574	-0.16895	-26.808	-280.303	1331.022	-1.3569	0.58252	-1.1558	-27.29	116.54	609.141	-0.18857	0.10899	-0.32529	-10.936	62.694	29.2769	0.094336	0.1752	0.013086
0.92	-34.276	93.321	106.4847	0.074707	-0.060791	-0.082032	11.1304	31.863	1312.857	-1.437	0.9458	-1.6011	-48.2234	75.801	1259.483	-1.3888	0.37998	-1.6735	-26.851	40.0001	46.6035	0.1228	0.032226	-0.15625	-35.367	-252.348	1329.5841	-1.4487	0.68994	-1.2417	-27.2359	90.51984	739.259	-0.27246	0.074219	-0.36914	-53.044095	30.8199	37.903	0.081836	0.19824	-0.010352
0.922	-65.144	65.5305	107.3012	0.085449	-0.055176	-0.084473	26.285	41.935	1309.0902	-1.3906	0.88672	-1.5859	-95.747	45.7119	1226.2767	-1.3647	0.38916	-1.6558	-49.195	34.7071	18.09	0.13135	0.023438	-0.1416	-49.944	-278.532	1342.06	-1.5319	0.77173	-1.2927	13.285	35.6655	881.5814	-0.38701	0.032031	-0.42422	-50.58	-2.989	78.2894	0.075586	0.22413	-0.039453
0.924	-31.979	91.644	99.412	0.089844	-0.043457	-0.080566	9.5126	66.2996	1304.7177	-1.3484	0.84546	-1.5711	-45.597	32.118	1223.741	-1.3309	0.39472	-1.6367	-59.131	7.5096	31.4167	0.14111	0.0058594	-0.12158	66.1726	-265.41	1351.545	-1.6206	0.84033	-1.3374	-0.924999999999997	73.719	995.55	-0.5211	-0.013281	-0.48867	-36.834	20.0766	74.094	0.069336	0.25195	-0.06543
0.926	-65.0081	61.786	71.5803	0.091797	-0.04248	-0.078613	1.318	60.273	1283.468	-1.2983	0.81689	-1.5601	-23.22	58.2459	1179.2554	-1.2863	0.40244	-1.6186	2.73	48.327	35.4859	0.14941	0.0024414	-0.10986	51.601	-287.201	1357.934	-1.7603	0.91064	-1.3843	-9.521	26.0385	1118.4022	-0.69883	-0.071875	-0.55782	-59.658	-14.5478	88.49333	0.061328	0.27022	-0.093456
0.928	-46.351	34.729	90.603	0.096191	-0.032715	-0.083496	8.657	71.263	1255.07521	-1.2373	0.79785	-1.5332	-56.2197	27.625	1163.19783	-1.2359	0.41143	-1.5901	-24.641	13.3352	19.17779	0.15967	-0.016113	-0.092773	57.2823	-319.073	1438.9287	-1.8203	0.93164	-1.4023	22.596	52.3927	1199.388	-0.9165	-0.13203	-0.62177	-58.204	36.4379	128.40987	0.051465	0.28516	-0.13047
0.93	-25.05	52.659	67.947	0.10107	-0.028564	-0.083008	-30.17253	94.403	1196.411	-1.2017	0.79541	-1.52	30.6899	90.674	1159.4228	-1.1817	0.4168	-1.5645	-8.88800000000001	15.2894	30.832	0.16724	-0.029541	-0.080566	68.174	-256.86	1513.928	-1.8979	0.94775	-1.4175	-20.1423	54.761	1198.647	-1.1733	-0.19043	-0.6792	-89.0338	57.142	177.253	0.03584	0.29727	-0.17031
0.932	-49.264	33.501	49.511	0.10059	-0.023926	-0.085938	-71.717	85.5089	1198.566	-1.1304	0.79932	-1.4956	3.769	109.257	1110.9503	-1.1367	0.42383	-1.5361	7.1	33.4763	14.496	0.17383	-0.044434	-0.066406	-14.391	-237.969	1554.6744	-1.9284	0.95532	-1.4236	-15.054	-53.096	1221.518	-1.4553	-0.20733	-0.70742	-111.57	26.5499	278.4443	0.006445	0.30449	-0.20303
0.934	-31.046	41.851	67.0571	0.10107	-0.021484	-0.085449	-42.5914	105.981	1227.8244	-1.0791	0.79004	-1.4668	28.2	99.107	1107.029	-1.0939	0.42285	-1.5017	-25.119	-5.531	21.9387	0.17578	-0.065918	-0.055664	-4.452	-195.0276	1603.775	-1.9468	0.95459	-1.4312	-21.707	-61.5172	1236.65	-1.7582	-0.19053	-0.73769	-85.477	81.676	372.122	-0.035645	0.31396	-0.24463
0.936	-32.597	66.202	39.195	0.10205	-0.020508	-0.081543	-85.356	83.392	1206.1573	-1.0269	0.78369	-1.437	54.3534	133.44	1061.2974	-1.0737	0.42393	-1.4651	-16.715	30.5333	35.1597	0.17725	-0.07373	-0.041992	-33.424	-134.508	1583.794	-1.9609	0.95313	-1.4434	-30.503	-125.459	1229.894	-2.0536	-0.11709	-0.78769	-108.1437	73.2059	475.211	-0.089746	0.32022	-0.28321
0.938	-68.9454	34.9143	35.16069	0.091797	-0.021484	-0.080078	-48.69	37.489	1196.335	-0.97217	0.75439	-1.4028	-4.047	106.632	1006.719	-1.0644	0.42158	-1.4276	-28.746	31.1269	5.349	0.17285	-0.095703	-0.032227	-39.916	-148.755	1570.0097	-1.978	0.9624	-1.4468	-19.917	-142.418	1241.419	-2.3	0.0094726	-0.84238	-92.921	67.062	657.426	-0.1622	0.31612	-0.3252
0.94	-18.764	49.2153	32.2064	0.092285	-0.023193	-0.086426	-3.628	59.9543	1162.9271	-0.94727	0.73633	-1.3809	28.348	138.565	997.4726	-1.062	0.41885	-1.3839	-40.159	12.88567	26.6421	0.16455	-0.11084	-0.023193	-17.954	-109.023	1587.452	-2.0405	0.98291	-1.4692	-32.3	-63.9792	1231.5665	-2.4761	0.18994	-0.90527	-57.283	99.44	799.498	-0.23604	0.30674	-0.38379
0.942	-47.636	32.393	-2.471	0.088379	-0.022461	-0.083984	-53.0117	64.815	1120.2345	-0.91162	0.70361	-1.3296	15.819	190.27	985.1912	-1.0522	0.42236	-1.353	-17.755	61.153	19.4129	0.15381	-0.12207	-0.020996	-24.419	-93.897	1584.475	-2.0926	1.0061	-1.4773	-13.14	-109.371	1232.2864	-2.5457	0.47168	-0.94062	-106.464	48.5671	903.271	-0.32041	0.30284	-0.4455
0.944	-61.335	9.7119	31.8253	0.084473	-0.029297	-0.082031	5.74	77.454	1127.956	-0.89404	0.67822	-1.2739	-10.686	168.891	954.9794	-1.0351	0.42149	-1.3164	-55.2656	39.379	4.3482	0.12891	-0.13916	-0.015137	-42.9554	-116.366	1632.2693	-2.1387	1.0332	-1.4902	-21.478	-88.68	1230.8919	-2.5914	0.88477	-0.96816	-103.295	58.499	1006.1354	-0.4209	0.28711	-0.51172
0.946	-23.978	28.286	33.101	0.083496	-0.03418	-0.07959	-3.534	130.8291	1081.2505	-0.88818	0.66943	-1.2476	19.776	178.928	932.9229	-1.0041	0.42422	-1.2816	-40.818	36.985	22.41	0.11572	-0.14404	-0.010254	-3.837	-94.83664	1628.984	-2.1797	1.0645	-1.4961	-49.027	-76.6966	1210.099	-2.6496	1.3234	-1.0654	-129.808	46.5296	1049.465	-0.55	0.27734	-0.57988
0.948	-53.071	5.2872	25.815	0.083008	-0.035156	-0.074219	-11.331	114.812	1057.3393	-0.87109	0.64551	-1.1992	-17.822	166.849	872.834	-0.96191	0.425	-1.2473	-33.859	58.402	1.635	0.099609	-0.13672	-0.0053711	-30.9783	-146.252	1605.402	-2.1831	1.0845	-1.4976	-36.973	-107.511	1249.083	-2.602	1.6222	-1.2479	-118.902	-17.808	1133.569	-0.71016	0.27392	-0.65078
0.95	-18.225	12.534	37.9437	0.087158	-0.031738	-0.068848	47.912	125.8364	1044.158	-0.8518	0.63256	-1.155	-19.886	129.581	844.431	-0.91865	0.42744	-1.2108	-53.0597	11.0824	22.0543	0.084717	-0.12866	-0.0039063	-23.213	-158.786	1657.9772	-2.1621	1.0957	-1.4922	-82.316	-51.221	1317.154	-2.3672	1.7676	-1.4033	-83.758	-16.173	1153.948	-0.90547	0.26807	-0.71563
0.952	-16.145	28.083	12.982	0.087402	-0.030762	-0.066895	-8.65	124.43278	1012.4276	-0.8252	0.61719	-1.124	-5.662	164.874	840.9467	-0.88086	0.42383	-1.1719	-17.74	28.3688	40.088922	0.075684	-0.11279	-0.0014648	-2.005	-115.483	1669.1064	-2.1209	1.0901	-1.4847	-137.2326	-13.08	1332.373	-1.9548	1.7997	-1.4587	-123.9832	-66.3566	1090.091	-1.1358	0.27178	-0.77021
0.954	-57.697	0.23	12.0052	0.10352	-0.031738	-0.05957	-12.072	113.45145	992.957	-0.79248	0.61084	-1.0737	-56.394	159.1624	800.9737	-0.84345	0.40996	-1.1264	-55.607	23.852	15.402	0.070313	-0.092773	-0.0058594	-56.328	-124.744	1689.14	-2.0723	1.082	-1.4727	-126.466	-30.06	1309.8285	-1.5476	1.7309	-1.4461	-104.15481	-99.136	1095.936	-1.3809	0.29004	-0.82617
0.956	0.618000000000002	25.6729	13.48103	0.1145	-0.032715	-0.052246	-4.24299999999999	159.721	961.6839	-0.7749	0.60352	-1.0508	-23.369	154.0985	785.904	-0.81094	0.40078	-1.0836	-46.019	-2.554	22.4407	0.074219	-0.083008	-0.0078125	-43.19	-56.061	1704.095	-1.9941	1.0703	-1.4521	-136.5281	-44.869	1268.6	-1.234	1.5352	-1.398	-67.26738	-58.2968	1092.739	-1.6222	0.33799	-0.87354
0.958	-9.397	28.092	-5.9851	0.125	-0.041992	-0.045898	-54.236	175.13	912.4266	-0.74512	0.58203	-1.0049	-34.019	160.915	741.69	-0.78438	0.38516	-1.0336	-21.72	55.242	14.7299	0.092773	-0.064453	-0.0083008	-106.487	-46.619	1673.1469	-1.9531	1.0664	-1.4414	-132.981	-177.85	1271.449	-1.0276	1.2667	-1.3137	-76.6163	-89.21282	1105.626	-1.828	0.40381	-0.92041
0.96	-32.476	19.403	5.5813	0.14209	-0.041504	-0.029785	-24.137	159.576	902.09317	-0.72778	0.5769	-0.9646	-79.6939	133.993	701.6584	-0.75439	0.37139	-0.98721	-61.5874	40.8325	9.1623	0.10205	-0.052734	-0.0080566	-106.83	-100.185	1680.748	-1.8691	1.0703	-1.4199	-104.4057	-238.438	1301.641	-0.91113	0.99219	-1.251	-35.008	-83.3093	1122.327	-1.9734	0.51006	-0.95088
0.962	-0.826999999999998	26.5415	20.4559	0.1499	-0.047363	-0.021484	-33.801	176.662	864.352	-0.71289	0.5625	-0.9209	-59.438	151.345	699.7448	-0.72461	0.354	-0.9375	-35.484	41.2083	32.13	0.11475	-0.050293	-0.014648	-62.006	-79.224	1672.4563	-1.8132	1.0755	-1.4021	-117.309	-234.396	1305.071	-0.86982	0.79658	-1.2085	-34.814	-87.05	1066.606	-2.0212	0.70185	-0.96377
0.964	-48.267	7.7877	11.608	0.1665	-0.061523	-0.01709	-47.992	137.66	835.074	-0.69385	0.53955	-0.86475	-93.2575	184.63904	669.6798	-0.69268	0.34101	-0.88974	-33.025	54.738	9.439	0.12891	-0.044922	-0.0087891	-105.206	-97.8657	1625.17989	-1.7603	1.0806	-1.3901	-87.3249	-256.987	1325.3253	-0.85342	0.65889	-1.1796	-20.025	-154.892	1067.4127	-2.0059	0.94922	-0.97266
0.966	-27.869	12.308	31.6828	0.17261	-0.074463	-0.0053711	-7.348	148.908	829.4175	-0.6875	0.52344	-0.83984	-108.5465	170.97	644.9976	-0.65801	0.32774	-0.8416	-76.0985	6.341	22.90048	0.1377	-0.047852	-0.013672	-47.206	-59.5261	1602.1594	-1.6992	1.0781	-1.3447	-100.56096	-224.412	1319.606	-0.85498	0.55967	-1.1609	-9.911	-117.62	1115.6491	-1.9063	1.1717	-1.0297
0.968	-24.377	46.888	7.298	0.17822	-0.085449	-0.00048828	-77.211	173.909	788.002	-0.66455	0.49854	-0.78271	-78.1663	194.728	602.8852	-0.63184	0.31406	-0.78574	-39.276	31.013	45.0039	0.14404	-0.05127	-0.012207	-54.27	-13.154	1552.106	-1.6733	1.0747	-1.3335	-85.9078	-244.654	1312.571	-0.87011	0.50176	-1.1639	-43.522	-102.346	1144.8723	-1.7007	1.3028	-1.1108
0.97	-57.1553	33.209	18.3884	0.18652	-0.104	0.003418	-56.412	134.524	782.8436	-0.64868	0.47779	-0.73999	-122.662	172.288	561.922	-0.60517	0.30303	-0.7419	-42.43	37.3764	31.7661	0.14868	-0.05835	-0.013428	-94.2876	-36.4926	1526.685	-1.6289	1.0605	-1.3008	-61.042	-286.279	1353.707	-0.8916	0.48145	-1.1895	-64.173	-113.515	1175.2925	-1.3823	1.3337	-1.1503
0.972	-15.165	49.416	29.9118	0.19141	-0.10938	0.0053711	-56.832	154.3982	737.35941	-0.63037	0.45361	-0.70068	-85.4963	148.414	540.3872	-0.58154	0.2876	-0.68896	-48.224	19.519	24.56539	0.15186	-0.061523	-0.018066	-47.481	-2.268	1525.776	-1.5993	1.0495	-1.2781	-59.23	-226.135	1406.856	-0.89902	0.48848	-1.2096	-75.251	-91.55	1151.196	-1.0804	1.3032	-1.1376
0.974	-36.528	50.735	-12.9654	0.19482	-0.12061	0.0058594	-85.542	146.997	674.0962	-0.59961	0.42627	-0.64648	-86.5352	173.128	519.577	-0.55801	0.26973	-0.63838	-18.708	71.262	10.216	0.15234	-0.071777	-0.019043	-44.722	-3.14506	1474.884	-1.5698	1.0376	-1.2534	-47.5874	-197.913	1430.1905	-0.91875	0.52051	-1.2196	-100.6322	-185.556	1134.888	-0.88818	1.2349	-1.0991
0.976	-48.271	28.0844	10.1205	0.19678	-0.12695	-0.0004883	-61.419	132.595	673.8703	-0.58594	0.41602	-0.62109	-105.1932	155.78627	483.23	-0.53594	0.2584	-0.59199	-32.016	58.57	-12.5856	0.15234	-0.074707	-0.022949	-51.89	-11.931	1456.266	-1.5249	1.0181	-1.2241	-40.9593	-141.963	1453.145	-0.96992	0.55293	-1.2301	-71.613	-252.976	1180.571	-0.84912	1.1107	-1.0469
0.978	-7.28	49.31	4.9306	0.2002	-0.13135	-0.00097656	-96.6565	187.6552	662.0817	-0.54248	0.39209	-0.56396	-54.311	152.3877	477.917	-0.51094	0.24512	-0.53809	-20.17	57.8547	19.261	0.14453	-0.075684	-0.030762	-16.641	33.712	1439.052	-1.5034	1.0083	-1.2065	-47.817	-60.012	1413.462	-1.0633	0.57852	-1.2394	-60.61	-273.78127	1233.354	-0.90732	0.95029	-1.0003
0.98	-47.0686	24.9875	1.577	0.19873	-0.13135	-0.0087891	-107.4067	176.926	646.187	-0.51147	0.38111	-0.51416	-92.5385	169.058	433.878	-0.47754	0.23262	-0.48379	-13.621	63.977	21.8224	0.14355	-0.07373	-0.032715	-74.9	29.435926	1416.597	-1.4512	0.99219	-1.1797	-15.6447	-81.181	1390.175	-1.189	0.6001	-1.2476	-64.37	-344.38	1266.3011	-1.0073	0.79561	-0.96279
0.982	-19.438	19.051	38.6857	0.19922	-0.12988	-0.010742	-72.895	183.329	622.725	-0.47754	0.3623	-0.46777	-73.4306	121.88	406.5545	-0.44092	0.22217	-0.43115	-49.41	9.34	18.47849	0.14307	-0.066895	-0.039063	-56.934	28.017	1434.791	-1.4109	0.97681	-1.1653	18.731	-82.31	1396.768	-1.3416	0.60723	-1.2526	-35.942	-320.048	1280.4724	-1.1104	0.68067	-0.92675
0.984	-20.178	47.9988	19.772	0.19385	-0.12305	-0.022461	-120.781	196.245	570.81	-0.42725	0.34229	-0.41748	-13.053	135.918	404.6306	-0.40049	0.21211	-0.38037	-13.172	28.812	40.9319	0.13965	-0.073242	-0.043457	-21.771	38.22	1396.3512	-1.3711	0.96289	-1.1484	-4.204	-82.402	1385.294	-1.4914	0.61601	-1.2664	-24.872	-338.914	1270.1993	-1.2085	0.61084	-0.9165
0.986	-59.808	26.8012	20.2293	0.18823	-0.11645	-0.027588	-76.509	156.9932	566.79117	-0.39063	0.33154	-0.38818	-57.481	140.4984	389.641	-0.36211	0.1999	-0.33252	-24.447	28.5832	21.504	0.14307	-0.0625	-0.047363	-55.204	-4.3863	1372.5388	-1.314	0.93994	-1.1304	36.298	-121.378	1433.1291	-1.6176	0.63985	-1.2941	17.532	-369.575	1314.4229	-1.287	0.58779	-0.94561
0.988	-15.222	45.482	40.806	0.18262	-0.11182	-0.036133	-60.605	184.752	541.878	-0.32617	0.2959	-0.33984	-12.663	112.7935623	384.596	-0.32226	0.1874	-0.28838	-30.624	1.124	51.3584	0.15039	-0.055664	-0.055176	4.336	19.8493	1360.4685	-1.2849	0.92407	-1.1199	47.336	-78.461	1453.772	-1.7107	0.67441	-1.333	18.922	-287.552	1353.852	-1.3476	0.60957	-0.99278
0.99	-57.9034	41.497	16.5851	0.1709	-0.096191	-0.054199	-97.5366	177.7016	498.58	-0.28271	0.2705	-0.30395	-14.281	127.732	346.54406	-0.29023	0.16982	-0.24043	-4.516	56.819	35.9558	0.16064	-0.053466	-0.06543	-38.37	43.9435	1301.234	-1.2559	0.90039	-1.1094	38.635	-101.6158	1466.081	-1.7734	0.71191	-1.373	-0.341000000000001	-273.429	1406.4101	-1.3988	0.66153	-1.058
0.992	-51.097	26.55595	27.949	0.16553	-0.089844	-0.060547	-51.321	150.6934	489.2484	-0.24414	0.24512	-0.27246	-28.445	106.3099	320.4645	-0.2583	0.1499	-0.19971	-29.973	33.406	-2.4569	0.17236	-0.050781	-0.077148	-55.701	53.09	1292.6687	-1.2275	0.87305	-1.0859	86.05	-100.3697	1502.6007	-1.8174	0.76309	-1.4228	-22.149	-242.482	1497.674	-1.4545	0.72803	-1.1309
0.994	-9.791	58.118	15.1616	0.15723	-0.077148	-0.07373	-63.261	177.809	461.722	-0.18994	0.19141	-0.22021	14.131	93.7015	338.402	-0.23105	0.12832	-0.16328	-26.924	26.7193	34.971	0.18213	-0.040527	-0.09082	-9.482	87.6267	1296.90947	-1.2109	0.86133	-1.0762	55.3662	-79.1409	1484.6179	-1.8508	0.81758	-1.4695	-59.4054	-193.15	1515.457	-1.5293	0.79492	-1.2031
0.996	-64.6934	41.2844	7.229	0.15454	-0.062256	-0.079346	-66.7109	146.209	435.094	-0.16895	0.16895	-0.19873	-4.588	110.5113	302.2755	-0.20059	0.10449	-0.12607	-33.933	49.15	17.1932	0.18848	-0.039063	-0.10254	-55.852	44.999	1271.404	-1.1802	0.83643	-1.0601	62.11	-116.612	1501.986	-1.8836	0.88399	-1.5195	-91.4831	-219.616	1536.236	-1.6137	0.84716	-1.2653
0.998	-37.752	37.6459	43.9572	0.15283	-0.049316	-0.09082	-10.14	139.45316	434.3843	-0.12842	0.12842	-0.14893	7.711	68.396	288.95	-0.18457	0.081836	-0.093652	-58.292	5.4811	31.18166	0.18945	-0.033203	-0.11133	6.898	25.946	1260.522	-1.1589	0.82251	-1.0456	20.087	-78.3313	1524.289	-1.9282	0.94893	-1.5622	-73.096	-154.711	1535.221075	-1.6972	0.88593	-1.3129
1	-25.097	43.6406	24.21	0.14697	-0.039063	-0.10254	-36.238	164.644	399.0249	-0.099123	0.093504	-0.11963	29.315	95.825	249.2555	-0.15371	0.06084	-0.061524	-8.483	30.70223	40.25689	0.18189	-0.032959	-0.12402	-16.156	72.8456	1206.1301	-1.1348	0.8125	-1.0352	-20.8151	-43.7158	1541.157	-1.9683	1.0005	-1.603	-81.07	-117.299	1500.26	-1.7754	0.91094	-1.3488
1.002	-48.457	23.132	22.48129	0.14404	-0.030762	-0.10938	-25.179	127.3421	397.704	-0.083984	0.075684	-0.1001	-7.886	98.5142	213.2477	-0.12793	0.04248	-0.032227	-34.56	33.9516	17.822	0.17041	-0.02832	-0.13477	-53.63784	99.6493	1173.6639	-1.0977	0.79688	-1.0137	22.6532	-58.3496	1571.458	-1.999	1.0318	-1.6247	-81.975	-150.306	1529.107	-1.8346	0.92646	-1.3767
1.004	8.541	40.2026	37.915	0.13867	-0.018066	-0.11768	-4.039	145.657	397.3271	-0.052734	0.03125	-0.058105	-4.48500000000001	66.5281	215.461	-0.099903	0.025586	-0.0055666	-61.9539	18.493	43.592	0.146	-0.020996	-0.15332	-18.859	166.478	1178.087	-1.0815	0.7915	-1.0015	17.0835	-12.956	1551.789	-2.018	1.0547	-1.6395	-62.133	-93.492	1564.036	-1.8745	0.9458	-1.4019
1.006	-50.5269	47.501	18.3721	0.13062	-0.013916	-0.12646	-15.711	135.5251	365.2352	-0.035156	0.0092773	-0.041016	-9.345	108.18	199.6804	-0.069824	0.012304	0.018945	-19.893	62.232	47.8258	0.13086	-0.013184	-0.1626	-59.654	182.336	1126.0641	-1.0522	0.77197	-0.97998	7.9855	-25.0155	1504.564	-2.0066	1.0644	-1.6445	-93.067	-132.29	1573.568	-1.9061	0.96065	-1.4233
1.008	-30.573	32.0578	41.546	0.125	-0.0097656	-0.13721	13.398	87.9353	377.707	-0.016113	-0.015625	-0.00097656	-36.551	99.6289	174.8814	-0.038183	0.005664	0.035742	-55.6647	39.7719	8.409	0.11377	0.0024414	-0.1792	-55.214	148.6345	1090.82	-1.03	0.7561	-0.96313	10.216	-19.2694	1463.1714	-1.9655	1.0489	-1.6432	-41.582	-167.978	1631.735	-1.9308	0.98176	-1.4457
1.01	6.334	51.467	31.6977	0.11182	-0.0073242	-0.15137	-3.869	122.2197	343.592593	-0.0053711	-0.025635	0.013428	-14.157	72.4859	172.2146	-0.0088869	-2e-08	0.048926	-46.556	32.7395	34.898	0.091797	0.01416	-0.20093	-9.313	141.546	1059.12363	-1.0054	0.74072	-0.94385	-29.7868	57.702	1417.482	-1.9219	1.0156	-1.6348	-17.723	-135.124	1646.46	-1.9589	1.0099	-1.4644
1.012	-48.4429	39.5099	15.8484	0.10693	-0.00048828	-0.16797	-14.859	91.809	309.9633	0.010254	-0.03418	0.035645	-73.9268	99.919	164.909	0.016602	-0.0014648	0.064453	-39.963	41.618	31.3301	0.067871	0.024902	-0.21777	-59.969	116.27846	1010.734	-0.98193	0.70947	-0.91357	-9.9619	43.7852	1405.0799	-1.8772	0.97295	-1.6203	-38.193	-194.537	1704.294	-1.9827	1.0458	-1.4917
1.014	-38.911	16.257	46.537	0.093262	-0.0024414	-0.17871	11.987	99.91447	291.1297	0.025391	-0.032227	0.048828	-67.419	67.721	164.2124	0.047851	-0.0029297	0.072363	-67.0517	-17.6574	56.5474	0.037598	0.037109	-0.24902	-31.8775	122.6531	1021.76	-0.96045	0.6958	-0.89795	-12.876	60.607	1410.691	-1.8226	0.92471	-1.6015	-46.875	-144.971	1737.717	-2.0073	1.0884	-1.5151
1.016	-27.946	22.0396	32.233	0.090088	-0.0021973	-0.19262	-19.597	139.4851	241.9145	0.040527	-0.032227	0.054199	-41.096	89.678	150.9893	0.072266	-0.0060546	0.080957	-30.765	-17.43484	72.933	0.00708	0.048584	-0.26953	-28.143	162.294	993.3326	-0.91943	0.67041	-0.86865	-28.61285	64.85892	1377.0769	-1.7616	0.88096	-1.5764	-78.4227	-95.821	1710.687	-2.0298	1.1393	-1.5302
1.018	-54.353	-9.783	46.8522	0.083496	0.0019531	-0.20508	-10.157	78.964	234.083	0.055664	-0.030273	0.070801	-93.6938	104.8188	115.0446	0.095313	-0.013476	0.095801	-35.729	-10.854	60.854	-0.038574	0.051758	-0.2876	-74.378	139.786	918.3188	-0.88721	0.64746	-0.84791	-8.367	0.619	1366.3362	-1.6988	0.84209	-1.555	-91.3443	-117.43	1724.179	-2.0533	1.1801	-1.5448
1.02	-8.074	15.9696	38.6129	0.079102	0.0063477	-0.22607	-14.279	94.445	230.1939	0.058838	-0.023926	0.077148	-69.0997	57.071	105.3765	0.11084	-0.0084961	0.097266	-53.0215	-36.434	111.6315	-0.11914	0.052246	-0.31104	6.142	133.03	885.8812	-0.84961	0.62305	-0.82324	-29.0544	50.90043	1315.866	-1.6401	0.80811	-1.5405	-77.85541	-49.16	1737.003	-2.069	1.2059	-1.5479
1.022	-27.079	31.064	16.811	0.077637	0.010254	-0.23584	-47.576	91.489	207.44	0.062012	-0.012207	0.079102	-73.784	89.535	82.604	0.12549	-0.0048828	0.098633	-9.067	4.5465	159.6849	-0.16895	0.046387	-0.32471	-20.8	139.851	823.329	-0.78662	0.59131	-0.7915	-75.629	59.1683	1286.417	-1.5858	0.77715	-1.526	-76.6586	-81.899	1734.577	-2.086	1.2188	-1.5449
1.024	-33.185	16.6842	25.36986	0.068359	0.020508	-0.25537	-0.474999999999994	61.2207	207.8776	0.063965	0.0029297	0.089355	-103.1893	70.278	74.761	0.13349	-9.768e-05	0.10615	-40.5387	6.41665	187.223	-0.27588	0.030273	-0.36865	-23.634	120.56	821.0573	-0.75781	0.57324	-0.77637	-85.8039	47.768	1314.594	-1.5366	0.76573	-1.5085	-65.778	-90.9547	1720.241	-2.0972	1.2124	-1.5269
1.026	1.376	28.6792	28.4962	0.059814	0.026856	-0.2771	-49.485	113.09	190.765	0.063965	0.012695	0.09375	-66.036	36.95	73.963	0.13642	-0.00039058	0.11133	-5.313	16.3047	297.79	-0.37403	0.010742	-0.41309	6.73399999999999	168.046	829.1361	-0.69922	0.53711	-0.74609	-79.333	84.334	1276.6619	-1.4886	0.76611	-1.5003	-67.318	-18.192	1668.225	-2.0932	1.1956	-1.5061
1.028	-50.33	19.9501	11.407	0.054688	0.034668	-0.29639	-81.32598	90.6178	178.8968	0.059082	0.027344	0.097656	-92.16796	76.479	67.46	0.13838	0.0085937	0.11992	23.3954	68.822	408.591	-0.49463	-0.010742	-0.46826	-46.5821	172.825	776.84767	-0.65234	0.50293	-0.71484	-66.791	20.1844	1261.603	-1.4282	0.77256	-1.4864	-71.776	-65.193	1637.086	-2.0786	1.166	-1.482
1.03	-16.358	12.616	27.5886	0.047852	0.034668	-0.32568	-38.579	81.0547	162.27	0.057617	0.034668	0.10767	-89.2949	46.647	84.8258	0.13633	0.01416	0.11748	-37.8831	54.9694	557.445	-0.69287	-0.050781	-0.53857	1.497	144.695	752.0193	-0.60547	0.47119	-0.68408	-35.211	37.7632	1256.6078	-1.3613	0.77734	-1.4785	-48.625	-21.3284	1617.4	-2.0568	1.1275	-1.4491
1.032	-18.629	34.542	32.2977	0.038574	0.039063	-0.33936	-89.4406	103.307	131.487	0.058105	0.043945	0.11279	-44.395	62.0314	75.0656	0.13672	0.022461	0.12109	51.3353	82.1636	695.2465	-0.8042	-0.074219	-0.57178	-2.39	164.2	684.899	-0.54883	0.43115	-0.65137	-27.3	56.077	1205.3406	-1.283	0.77871	-1.4702	-56.933	1.6572	1582.0629	-2.024	1.0891	-1.4193
1.034	-55.707	5.7628	52.297	0.011719	0.037598	-0.37207	-65.8213	51.6315	123.5208	0.064941	0.050293	0.11182	-95.032	102.024	43.679	0.13476	0.028125	0.12451	47.224	79.284	767.252	-1.082	-0.104	-0.64453	-23.302	123.2223	650.668	-0.51758	0.41211	-0.62842	-17.224	27.321	1191.033	-1.2089	0.77138	-1.4624	-43.699	-34.72	1565.72618	-1.9902	1.0508	-1.3945
1.036	-8.568	-9.6138	77.878	-0.021729	0.029785	-0.39136	-59.393	73.973	100.272	0.072266	0.04834	0.11621	-46.07	73.777	50.5154	0.13985	0.038965	0.13037	8.9352	45.5027	905.79103	-1.3096	-0.10498	-0.68701	15.324	135.27079	633.5248	-0.45947	0.35889	-0.59326	-19.018	98.716	1166.9061	-1.1421	0.76358	-1.4472	-19.316	42.821	1539.712	-1.9574	1.0288	-1.3751
1.038	-44.335	4.004	55.305	-0.076172	0.029297	-0.40771	-75.55899	75.304	84.074	0.09082	0.047852	0.12109	-25.87	114.011	38.754	0.14649	0.045996	0.12842	46.452	74.107	1001.8431	-1.5483	-0.081055	-0.73975	-26.198	169.198	593.672	-0.41431	0.31909	-0.56299	-18.052	78.891	1149.82049	-1.0871	0.75898	-1.4285	-44.979	16.6685	1518.425	-1.9242	1.0248	-1.3658
1.04	-38.9286	-4.34106	95.926	-0.16699	0.0073242	-0.44922	-50.291	19.768	90.366	0.10474	0.041504	0.12085	-65.0005	88.118	40.6066	0.15586	0.053028	0.12988	-2.53	36.2756	1032.64328	-1.8691	0.010742	-0.79297	-2.897	151.174	565.1586	-0.36719	0.28174	-0.53418	19.347	74.577	1127.411	-1.043	0.75195	-1.3984	-67.039	14.64429	1540.4548	-1.8875	1.0284	-1.3595
1.042	11.144	19.0611	139.366	-0.22168	-0.0053711	-0.47168	-79.4729	76.1705	65.372	0.12354	0.035645	0.12549	-4.39	46.4521	52.1422	0.16895	0.060547	0.13232	13.765	7.388	1069.736	-2.0229	0.083984	-0.83545	31.9679	149.385	531.036	-0.30957	0.24072	-0.50928	4.40000000000001	118.1	1076.7809	-1.0106	0.74483	-1.3731	-68.819	51.337	1508.279	-1.8446	1.0494	-1.3561
1.044	-27.4206	14.3392	194.726	-0.34424	-0.047363	-0.5249	-72.8772	42.274	72.7615	0.1333	0.024414	0.12158	-22.87	75.716	32.664	0.17901	0.062305	0.12793	24.356	12.391	1076.289	-2.2456	0.28662	-0.91162	-19.067	138.7748	469.24	-0.27148	0.21533	-0.48975	7.088	111.94	1062.064	-0.9916	0.73164	-1.3383	-59.45	-13.495	1493.99119	-1.8008	1.082	-1.3501
1.046	-5.563	5.77046	313.916	-0.46606	-0.077149	-0.57813	-34.598	39.2943	75.8519	0.14014	0.019531	0.11963	5.505	27.063	49.5487	0.18448	0.060254	0.12099	-16.01	-51.633	1081.784	-2.3025	0.47778	-0.9563	8.456	109.818	456.745	-0.21875	0.17285	-0.46777	-2.1	175.893	1045.541	-0.97871	0.7125	-1.3012	-57.762	20.25497	1492.3508	-1.7555	1.105	-1.3394
1.048	46.282	43.236	428.301	-0.60986	-0.10791	-0.63037	-53.566	102.839	49.8342	0.1416	0.0068359	0.11426	14.017	36.9893	49.8265	0.18916	0.05791	0.11943	-32.192	-60.736	1113.741	-2.2715	0.70898	-0.98828	9.151	157.68	432.846	-0.1709	0.14306	-0.45044	-36.451	207.127	989.731	-0.96572	0.69248	-1.2645	-60.1024	17.8423	1453.333	-1.7114	1.1136	-1.3331
1.05	-5.989	44.5019	577.028	-0.86865	-0.14502	-0.69678	-32.739	63.875	45.7477	0.14185	-0.0061035	0.10914	-21.048	67.594	31.47609	0.1874	0.054688	0.11191	-21.572	-46.242	1102.798	-2.1172	1.0605	-1.0332	-36.861	148.4578	418.9508	-0.12305	0.11377	-0.43604	-37.984	151.9796	977.2118	-0.96094	0.67383	-1.2266	-47.382	-33.711	1445.7661	-1.6744	1.1085	-1.3169
1.052	25.9755	45.1365	738.35	-1.0171	-0.14697	-0.72021	-17.653	83.43	37.03029	0.14014	-0.019043	0.10254	22.486	17.60942	38.313	0.18311	0.05127	0.10645	-28.309	-84.1487	1147.73011	-2.0254	1.2246	-1.0713	-2.041	145.265	428.455	-0.073242	0.072754	-0.41309	-48.254	171.268	943.953	-0.95059	0.64258	-1.1853	-28.282	30.449	1406.8631	-1.6367	1.0866	-1.3018
1.054	53.309	56.255	817.186	-1.3672	-0.14111	-0.81055	-43.175	85.015	29.4151	0.12891	-0.028809	0.089355	-0.612000000000002	46.763	25.598	0.17188	0.043066	0.099513	-12.18	-61.09899	1167.4161	-1.8003	1.4321	-1.2085	-42.866	169.03	371.673	-0.053223	0.05127	-0.40137	-30.363	127.18	917.5547	-0.93555	0.61192	-1.1477	-70.814	16.715	1354.97128	-1.6069	1.0649	-1.2749
1.056	30.372	39.2378	956.527	-1.6333	-0.083985	-0.89111	-22.683	24.166	29.3948	0.12061	-0.026855	0.087891	-20.022	37.6367	26.41818	0.15908	0.039746	0.094434	-29.31	-63.89	1137.397	-1.5163	1.4406	-1.2835	-37.417	122.5218	366.719	-0.01416	0.01709	-0.38965	-25.659	131.1671	918.266	-0.91797	0.59277	-1.1106	-40.012	12.891	1358.3106	-1.5752	1.0411	-1.2549
1.058	62.199	58.46	1073.7021	-1.9058	0.0068359	-0.97607	-7.319	72.5136	27.97	0.10986	-0.023438	0.072266	16.678	1.0762	54.228	0.14736	0.039746	0.086621	-32.83	-93.0634	1152.634	-1.1777	1.3496	-1.293	-7.015	134.752	356.3414	0.0085449	-0.006592	-0.37817	-32.301	191.501	857.7415	-0.90137	0.57168	-1.0775	-27.384	73.381	1325.803	-1.5481	1.017	-1.2362
1.06	-0.4342	37.558	1116.48701	-2.2402	0.21045	-1.0918	0.939	39.3184	29.58	0.10059	-0.010742	0.074219	-18.273	52.383	36.7041	0.13477	0.042774	0.080176	-30.838	-29.041	1172.497	-0.78271	1.1313	-1.228	-65.2668	148.054	316.3934	0.028809	-0.033691	-0.35498	-68.653	150.4254	835.6381	-0.8833	0.55713	-1.0376	-53.681	52.795	1301.835	-1.5124	0.99404	-1.2155
1.062	33.7533	4.041	1179.049	-2.3701	0.34277	-1.1504	14.178	25.7278	48.094	0.09668	0.0048828	0.068848	-24.686	13.4871	46.7688	0.12939	0.05127	0.075195	-110.5073	-9.307	1191.0777	-0.67578	0.98828	-1.1895	-46.376	105.25166	305.9	0.046875	-0.0625	-0.33887	-66.028	174.1614	801.104	-0.86142	0.5461	-1.0043	-29.381	105.322	1304.56202	-1.4722	0.97427	-1.1991
1.064	60.5087	3.997	1165.987	-2.5308	0.70166	-1.2437	-19.38	79.78	16.5479	0.098145	0.03418	0.064453	-6.644	17.7923	47.1141	0.11924	0.061524	0.067383	-90.324	19.642	1202.5352	-0.59619	0.71533	-1.1558	-49.015	131.42	265.9985	0.045898	-0.069824	-0.33447	-76.184	172.469	751.463	-0.83388	0.53916	-0.97216	-38.247	145.931	1270.0488	-1.439	0.95557	-1.1772
1.066	3.498	-32.956	1173.678	-2.5537	1.0537	-1.3037	3.5	33.6202	6.3529	0.10205	0.05127	0.063477	-60.4873	54.626	26.75549	0.11601	0.077246	0.059375	-100.0658	17.2	1163.176	-0.59302	0.54468	-1.1277	-87.858	93.631	241.128	0.060059	-0.084961	-0.33203	-78.3	130.79	756.6472	-0.80693	0.52627	-0.94131	-67.187	125.226	1273.371	-1.4087	0.9348	-1.1602
1.068	18.2994	-49.088	1200.186	-2.5288	1.397	-1.3999	8.095	51.589	15.2235	0.10742	0.085449	0.05957	-35.345	10.0147	39.27	0.11601	0.089746	0.060547	-127.819	-106.5701	1160.158	-0.61133	0.39844	-1.0898	-17.667	76.698	250.6472	0.068115	-0.087646	-0.31714	-66.997	176.2495	747.4617	-0.77354	0.51543	-0.90449	-69.321	184.446	1223.28803	-1.3776	0.91375	-1.1341
1.07	-22.506	-49.2694	1174.882	-2.2949	1.6484	-1.584	-23.468	66.1317	10.5658	0.11573	0.10767	0.061768	-44.098	57.326	19.05734	0.12246	0.10322	0.058008	-86.129	-153.386	1200.136	-0.65527	0.26514	-1.0684	-45.659	111.7332	225.8617	0.072754	-0.086426	-0.30811	-123.307	146.9961	722.551	-0.7417	0.50439	-0.86768	-84.7323	153.13	1163.7315	-1.3525	0.88868	-1.1154
1.072	-7.844	-76.627	1203.95114	-2.0444	1.6626	-1.6284	-4.452	3.66	37.866	0.12451	0.12646	0.060547	-84.8722	44.3699	8.9123	0.13232	0.11523	0.054688	-90.025	-187.586	1206.451	-0.68115	0.22998	-1.0718	-60.6728	91.8742	200.22	0.074707	-0.080566	-0.30078	-113.917	161.937	698.396	-0.70489	0.48984	-0.82637	-52.024	150.139	1154.8119	-1.3286	0.86701	-1.0969
1.074	31.914	-51.113	1212.4556	-1.3608	1.5317	-1.5669	-16.329	39.1556	35.783	0.13428	0.14209	0.06543	-51.181	10.1045	29.7786	0.14287	0.12744	0.055274	-75.497	-216.824	1258.981	-0.73486	0.23682	-1.1108	-35.884	114.579	206.319	0.074707	-0.075684	-0.29834	-103.185	212.959	634.436	-0.6666	0.47089	-0.78506	-10.132	189.552	1120.837	-1.3027	0.84961	-1.0791
1.076	-27.07	-54.882	1215.6504	-0.91674	1.2844	-1.4763	-20.556	15.603	37.7704	0.13721	0.14258	0.074707	-97.169	47.9156	12.773	0.15322	0.1333	0.060449	-46.341	-161.5303	1245.0071	-0.77466	0.29053	-1.1497	-89.448	141.044	170.769	0.069824	-0.071289	-0.29053	-80.1977	168.733	609.4415	-0.63769	0.44981	-0.74444	-26.526	127.7332	1096.48477	-1.2747	0.82593	-1.0548
1.078	-20.783	-72.63476	1244.216	-0.63232	0.97705	-1.3979	-6.209	18.4641	47.79	0.14893	0.14209	0.081543	-86.7852	1.917	23.6373	0.16455	0.13486	0.064746	-41.589	-210.212	1204.117	-0.82031	0.36719	-1.1826	-30.646	96.4353	180.4548	0.066651	-0.059082	-0.27832	-81.306	192.143	607.0084	-0.60947	0.42862	-0.70557	-20.83	143.5	1057.5362	-1.2506	0.80177	-1.0346
1.08	-6.17899999999999	-43.248	1262.0116	-0.51758	0.60742	-1.3281	-42.33	80.61	31.4087	0.15113	0.13965	0.090088	-60.069	-0.9358	29.7858	0.17177	0.13564	0.06289	-21.361	-225.731	1254.884	-0.92139	0.46436	-1.2417	-32.986	113.679	170.611708	0.055176	-0.055176	-0.27686	-87.033	187.81	548.818	-0.58789	0.39648	-0.66406	-30.232	145.224	1005.663	-1.2213	0.78188	-1.0084
1.082	-83.323	-20.472	1294.602	-0.51855	0.48828	-1.3086	-49.6526	31.1275	19.2962	0.15332	0.13037	0.094238	-99.10633	42.7769	20.2667	0.17578	0.13086	0.069824	0.795999999999999	-195.583	1298.025	-0.98633	0.49512	-1.2637	-66.9398	92.901	139.2465	0.041016	-0.059082	-0.28418	-55.727	151.8362	550.5957	-0.55664	0.37061	-0.62784	-28.807	110.332	983.16024	-1.1958	0.74732	-0.98503
1.084	-56.513	7.447	1338.009	-0.55713	0.34863	-1.2827	-26.607	51.169	18.2541	0.15283	0.11523	0.10693	-61.8871	2.074	34.578	0.1832	0.11992	0.076758	-14.016	-232.634	1370.5387	-1.1367	0.5459	-1.3066	-1.79	74.38	143.9038	0.041504	-0.054199	-0.27881	-56.977	191.881	537.1432	-0.53418	0.34053	-0.58008	5.40600000000001	165.8566	954.047	-1.1694	0.72314	-0.96045
1.086	-78.3352	11.64	1296.876	-0.60449	0.29956	-1.2808	-71.9612	61.9924	9.074	0.15771	0.10596	0.11182	-59.551	40.935	20.7724	0.18506	0.10791	0.08125	18.7467	-174.666	1412.894	-1.2647	0.57959	-1.3379	-36.654	115.8383	100.045	0.033203	-0.049316	-0.27588	-65.7058	144.4163	491.2158	-0.51582	0.31553	-0.54609	-39.022	150.318	940.721	-1.1441	0.70188	-0.93547
1.088	-118.85	-82.498	1278.015	-0.65088	0.27246	-1.3071	-54.506	-7.855	38.5439	0.15967	0.094238	0.11816	-73.4807	39.531	15.9101	0.19053	0.094238	0.085937	8.3281	-120.852	1367.495	-1.3921	0.62646	-1.3687	-34.008	64.49	103.7468	0.035156	-0.023681	-0.25879	-43.6	136.66026	474.337	-0.48701	0.29229	-0.50517	-15.937	158.4807	913.2514	-1.1145	0.67698	-0.90998
1.09	-85.2598	-139.122	1265.292	-0.69043	0.27637	-1.3438	-61.039	41.4082	37.2359	0.16992	0.088379	0.11768	-31.237	-2.9675	21.2672	0.19121	0.081836	0.084766	-7.95	-113.536	1364.6311	-1.5234	0.68164	-1.4277	-20.453	78.603	102.3539	0.032715	-0.013184	-0.25049	-24.665	178.749	436.1972	-0.45947	0.27197	-0.46094	-8.765	195.326	873.369	-1.0801	0.65666	-0.8842
1.092	-101.297	-195.039	1278.076	-0.69922	0.28711	-1.3574	-78.8639	12.549	32.3853	0.17285	0.089355	0.11816	-46.634	47.3228	7.961	0.19678	0.074219	0.082031	14.105	-39.215	1362.304	-1.5737	0.71143	-1.4575	-49.581	84.4168	77.6758	0.021484	0.0078125	-0.24658	-34.717	134.9951	423.4899	-0.42988	0.2501	-0.42187	-66.87	170.221	851.4645	-1.0409	0.63634	-0.85899
1.094	-63.6384	-223.407	1334.635	-0.71289	0.32129	-1.3691	-49.926	5.4303	48.0314	0.17529	0.095703	0.11133	-35.842	8.63	22.0812	0.20312	0.068066	0.082031	11.493	-64.926	1358.101	-1.625	0.77344	-1.5293	8.134	26.363	91.5007	0.025879	0.015137	-0.24365	-11.834	164.18	427.4686	-0.39814	0.22783	-0.38467	-16.78	189.454	826.222	-0.99561	0.61572	-0.83154
1.096	-31.956	-185.455	1333.6976	-0.74854	0.35889	-1.3907	-61.2201	62.355	26.165	0.17676	0.097412	0.10449	-4.105	9.2303	24.953	0.20966	0.06582	0.075683	58.4579	-65.826	1405.91392	-1.6451	0.83496	-1.5972	-18.237	76.6749	71.114	0.018555	0.01709	-0.23877	-19.58	148.572	403.22	-0.36377	0.20283	-0.34522	-19.335	186.527	754.2572	-0.95038	0.59775	-0.80215
1.098	-60.6448	-228.735	1313.239	-0.81104	0.39746	-1.4165	-44.177	10.3999	37.827	0.17188	0.10889	0.098145	-33.449	49.0515	0.774000000000001	0.21201	0.062695	0.066309	60.409	-43.18	1401.649	-1.6621	0.89063	-1.6738	-60.8988	59.8428	67.2056	0.02832	0.018311	-0.229	-15.565	95.5711	403.381	-0.32842	0.18779	-0.31201	-40.673	152.0233	720.239	-0.90115	0.57597	-0.77226
1.1	-24.786	-239.208	1329.11	-0.94922	0.45703	-1.4688	-30.906	34.021	37.2565	0.16309	0.12109	0.081055	0.426000000000002	11.1531	21.8807	0.21387	0.064746	0.05791	59.269	-103.7368	1432.377	-1.6641	0.95703	-1.7695	-5.738	33.0296	89.80984	0.02832	0.018066	-0.2168	9.761	145.751	363.5396	-0.29102	0.16748	-0.2793	-6.659	191.6466	678.196	-0.8496	0.55254	-0.74023
1.102	-24.501	-199.564	1355.578	-1.0755	0.49927	-1.4939	-53.283	37.70652	20.9657	0.15332	0.12744	0.077637	7.85	61.265	6.9549	0.20898	0.067871	0.049805	91.841	-73.52207	1452.867	-1.6602	0.99219	-1.8105	-36.881	79.0604	65.561	0.032227	0.018555	-0.20361	-2.284	104.2177	322.95612	-0.2581	0.14951	-0.24648	-23.094	154.1738	639.293	-0.79726	0.52402	-0.71074
1.104	-15.827	-193.497	1415.1054	-1.1968	0.54932	-1.5269	-28.53	-27.2997	39.0941	0.14063	0.14893	0.062988	-13.823	62.489	5.5875	0.20293	0.073535	0.032715	68.082	-71.2518	1442.76	-1.6348	1.0215	-1.8652	-33.764	31.886	68.61	0.029785	0.014648	-0.20117	7.161	103.4034	315.91	-0.22763	0.12578	-0.21211	-1.272	149.746	635.7398	-0.74414	0.50098	-0.68164
1.106	9.063	-128.5258	1453.97	-1.3125	0.62207	-1.5723	-31.997	24.7574	18.061	0.12475	0.16309	0.048339	17.252	25.827	22.4752	0.1872	0.085351	0.017285	46.3547	-98.794	1475.705	-1.6228	1.033	-1.8865	-16.894	36.2044	61.564	0.029785	0.0058594	-0.18604	-12.187	132.453	273.4348	-0.19912	0.10508	-0.18125	4.458	173.5364	571.2201	-0.69571	0.47168	-0.65117
1.108	-10.2549	-101.938	1414.00557	-1.3555	0.66406	-1.5996	-6.854	-0.157	19.9951	0.11523	0.18799	0.038574	-1.734	63.608	17.187	0.17236	0.097461	0.0024414	48.1384	-38.7408	1482.41	-1.6113	1.0342	-1.9043	-71.9603	56.9237	29.736	0.033448	0.0014649	-0.17773	-26.281	71.281	268.162	-0.17217	0.092676	-0.14199	-41.02	146.58	553.9782	-0.6419	0.44229	-0.62295
1.11	-19.2204	-118.6	1426.7263	-1.3906	0.7334	-1.6738	-9.671	-16.7349	33.9267	0.099609	0.22168	0.0048828	-13.775	26.3681	24.87597	0.15274	0.11152	-0.018848	15.8327	-58.098	1479.577	-1.5996	1.0176	-1.9004	-39.425	8.178	43.5753	0.035156	-0.0083008	-0.16943	-34.582	99.383	261.4542	-0.15088	0.07666	-0.11719	-9.392	166.0169	537.2811	-0.58291	0.41885	-0.59443
1.112	26.8466	-64.449	1408.654	-1.3757	0.7605	-1.7239	-21.755	52.35	10.06	0.092773	0.23682	-0.0043945	5.567	17.83166	37.8228	0.1416	0.12402	-0.039551	-1.4864	-53.706	1515.104	-1.5967	1.0039	-1.9023	-43.944	56.2242	30.372	0.034668	-0.013672	-0.15869	-22.432	87.37	233.5519	-0.13086	0.064258	-0.087303	-48.236	170.661	499.426	-0.52481	0.38789	-0.55898
1.114	18.0173	-87.086	1406.42	-1.3667	0.79346	-1.7808	6.56	4.2404	18.4247	0.069336	0.27441	-0.039551	-38.474	60.4442	12.523	0.12627	0.13711	-0.058789	11.2575	-18.575	1508.804	-1.5737	0.97217	-1.8823	-63.0151	33.398	19.614	0.037109	-0.01416	-0.16064	-63.1618	57.478	225.651	-0.10547	0.054004	-0.052832	-61.897	146.0106	479.524	-0.46729	0.35205	-0.53467
1.116	62.5191	-91.511	1443.354	-1.377	0.81445	-1.8633	-6.587	39.748	23.9074	0.051026	0.29639	-0.066406	-1.967	14.094	16.7078	0.11406	0.14844	-0.082812	-4.6999	-79.537	1490.658	-1.5469	0.94922	-1.8564	-30.661	-4.1272	30.451	0.037598	-0.03418	-0.13867	-40.524	116.409	192.31	-0.092969	0.041113	-0.030567	-26.495	174.13	451.903	-0.41348	0.32158	-0.50547
1.118	71.786	-66.265	1425.523	-1.3862	0.82861	-1.8901	-25.357	50.614	5.7393	0.027832	0.31445	-0.092285	-20.077	55.113	26.3691	0.09375	0.17031	-0.11015	28.8272	-41.847	1469.574	-1.5176	0.92383	-1.8281	-65.8091	51.4527	-4.479	0.04126	-0.039551	-0.1333	-53.321	92.6917	167.077	-0.072754	0.036133	-0.007422	-64.3851	157.885	427.57544	-0.36269	0.29638	-0.4751
1.12	64.834	-114.2148	1431.853	-1.4292	0.85205	-1.9507	15.836	-13.97513	27.8662	-0.029785	0.34424	-0.12842	-59.3146	48.7401	11.215	0.076563	0.18789	-0.13848	5.9367	-9.5006	1386.158	-1.459	0.87695	-1.793	-51.454	6.2129	5.2181	0.046387	-0.044922	-0.11865	-78.6079	101.5005	182.1675	-0.055176	0.033203	0.01416	-42.3265	147.4734	416.164	-0.32012	0.26435	-0.44541
1.122	121.644	-77.9685	1463.454	-1.455	0.86426	-1.9888	12.625	29.551	29.718	-0.057129	0.35889	-0.14648	-17.586	-2.420687	62.8462	0.05127	0.20947	-0.16943	-13.92629	-16.5225	1376.072	-1.4409	0.8501	-1.7729	-45.78	18.8224	17.682	0.052734	-0.053223	-0.10986	-65.3154	119.544	154.9227	-0.034277	0.031836	0.032422	-32.024	145.8883	364.803	-0.27735	0.23603	-0.41035
1.124	99.838	-91.49	1456.018	-1.4878	0.88525	-2.0151	-24.038	-16.289	34.268	-0.12598	0.37109	-0.19092	-65.981	35.94	73.547	0.023731	0.23164	-0.1957	30.8	69.759	1366.229	-1.3921	0.77881	-1.7476	-76.48	57.936	21.2319	0.054199	-0.048828	-0.104	-92.6694	48.958	136.5589	-0.011133	0.032911	0.049023	-52.491	116.143	339.9866	-0.24365	0.19971	-0.38428
1.126	92.527	-123.288	1510.358	-1.5015	0.90869	-2.0542	12.859	-41.3389	65.5218	-0.18945	0.37134	-0.23267	-69.833	14.2096	91.7983	-0.005078	0.24786	-0.23281	-18.8171	47.2175	1356.3716	-1.362	0.73364	-1.738	-33.636	4.85701	23.9066	0.063477	-0.061523	-0.086914	-66.708	80.89	134.7723	0.0064453	0.036816	0.066602	-17.96	123.293	311.2337	-0.20684	0.17793	-0.36182
1.128	106.058	-84.797	1506.89	-1.5034	0.91553	-2.064	-34.503	11.0603	62.168	-0.25879	0.36621	-0.27588	-56.164	19.5195	110.0255	-0.041797	0.26621	-0.26992	5.387	52.4294	1372.4135	-1.3438	0.69824	-1.7207	-39.779	47.295	1.846	0.078613	-0.062012	-0.079102	-67.81	90.634	109.649	0.027051	0.040821	0.083105	-45.172	138.7212	275.557	-0.16797	0.15244	-0.33515
1.13	17.93444	-105.269	1489.474	-1.4824	0.9043	-2.0703	-38.368	-33.1407	109.4475	-0.37354	0.37207	-0.34766	-119.7243	57.379	130.559	-0.080566	0.28672	-0.30508	5.9185	78.7365	1318.684	-1.3257	0.67236	-1.7065	-55.91869	32.3719	5.237	0.085449	-0.065918	-0.075195	-77.92695	66.259	102.3796	0.049316	0.045898	0.095215	-38.909	113.854	262.8463	-0.12656	0.13252	-0.31523
1.132	34.233	-71.756	1519.314	-1.45	0.88599	-2.0584	-39.296	0.349	188.395	-0.44043	0.37158	-0.37842	-94.016	10.8475	213.4688	-0.13037	0.31104	-0.34033	-35.9383	36.168	1295.258	-1.313	0.67041	-1.7007	-11.112	3.6474	22.9257	0.10498	-0.069336	-0.062988	-59.992	120.5381	81.421	0.062598	0.048535	0.1085	-17.692	122.446	234.653	-0.092186	0.11153	-0.29023
1.134	46.098	-16.964	1489.533	-1.4141	0.86133	-2.043	-67.293	28.083	242.278	-0.58594	0.36719	-0.45605	-100.8013	68.859	282.489	-0.17871	0.33076	-0.37549	-22.203	91.271	1307.8656	-1.29	0.67578	-1.6953	-43.382	67.12	12.7978	0.12134	-0.068848	-0.051514	-72.706	79.2565	62.756	0.07334	0.048242	0.117	-68.4007	105.4971	220.033	-0.056641	0.089355	-0.27295
1.136	31.582	-40.044	1484.457	-1.353	0.81494	-2.0073	-57.627	-23.6704	350.949	-0.71753	0.37183	-0.49976	-132.1156	84.0728	399.81	-0.23155	0.34697	-0.41474	-49.0334	103.89	1277.604	-1.2558	0.68262	-1.686	-48.73	12.2514	7.0956	0.13721	-0.075195	-0.038574	-52.043	78.7637	76.8607	0.088965	0.050977	0.11543	-51.395	114.6508	228.4916	-0.029199	0.068945	-0.2542
1.138	65.982	-13.206	1457.2666	-1.3198	0.78564	-1.9878	-40.126	45.991	447.426	-0.85547	0.38721	-0.53906	-114.17	57.6475	549.618	-0.2835	0.35284	-0.46513	-27.012	79.707	1275.1505	-1.2183	0.69482	-1.6655	-6.208	25.4123	11.46804	0.15527	-0.071777	-0.040039	-49.886	104.465	75.4622	0.096777	0.060937	0.12236	-24.449	139.142	208.624	-0.0038085	0.046289	-0.23906
1.14	42.2552	-19.081	1382.459	-1.2676	0.7207	-1.957	-47.0138	44.5	577.225	-1.042	0.42725	-0.58594	-96.088	92.823	662.098	-0.34639	0.36299	-0.52432	13.842	101.848	1281.5875	-1.1758	0.70215	-1.6504	-38.862	66.726	-10.3101	0.16211	-0.078613	-0.029297	-53.0066	60.7445	73.0996	0.10156	0.068359	0.12842	-87.3986	122.171	193.19125	0.017285	0.027539	-0.22773
1.142	15.0081	-41.547	1373.134	-1.2307	0.6726	-1.9343	-38.9745	34.592	694.2305	-1.1343	0.45752	-0.604	-83.777	55.6381	762.7251	-0.43213	0.36572	-0.58936	-0.0399999999999991	46.322	1236.943	-1.1563	0.69922	-1.6367	-10.137	14.3207	34.903	0.17773	-0.09082	-0.020996	-9.806	85.9279	83.929	0.10518	0.072949	0.13613	-51.412	127.94	180.0306	0.039551	0.0064455	-0.21641
1.144	56.037	16.3125	1353.525	-1.2065	0.63135	-1.9097	-65.26053	95.98	770.703	-1.3003	0.53857	-0.646	-77.968	58.776	878.6913	-0.54707	0.35488	-0.65996	0.280999999999999	38.459	1257.8395	-1.1167	0.68994	-1.6089	-13.843	60.286	27.8815	0.18872	-0.10132	-0.013672	-29.652	83.576	49.652	0.10889	0.082227	0.14707	-50.748	133.863	137.45	0.059082	-0.021484	-0.20166
1.146	15.5624	3.868	1330.3108	-1.1895	0.60254	-1.8906	-64.6929	55.5534	843.5652	-1.4029	0.63232	-0.66943	-97.862	99.182	947.394	-0.70069	0.34834	-0.72998	12.054	90.138	1237.5862	-1.1037	0.67798	-1.5769	-36.932	46.4806	16.6398	0.19775	-0.10645	-0.0048828	-46.656	49.0246	51.0165	0.11006	0.090039	0.14824	-32.43	113.6047	134.146	0.070312	-0.036816	-0.19961
1.148	19.5917	8.521	1341.991	-1.1797	0.60205	-1.8789	-88.092	84.265	917.169	-1.4902	0.75391	-0.6875	-86.237	34.2189	1028.122	-0.89951	0.34443	-0.79287	0.902999999999999	78.723	1217.506	-1.0957	0.66406	-1.5469	-9.578	0.993499999999999	29.7745	0.20654	-0.11768	-0.0029297	8.785	94.211	45.7231	0.11318	0.10283	0.15703	17.735	118.7179	126.3501	0.077735	-0.055371	-0.196
1.15	39.433	51.185	1282.69	-1.1758	0.59961	-1.8633	-95.199	95.098	941.356	-1.5781	0.98047	-0.69336	-76.293	45.4343	1062.418	-1.1245	0.34785	-0.84316	46.124	115.932	1209.429	-1.0815	0.65088	-1.5034	-45.012	67.774	11.1569	0.20801	-0.12451	0.0014648	-4.318	49.8789	19.9384	0.11963	0.1123	0.15674	-47.442	100.3028	93.552	0.080469	-0.071387	-0.19444
1.152	-27.0897	28.931	1270.215	-1.1716	0.60181	-1.8464	-74.93	13.3389	960.467	-1.6128	1.0962	-0.70654	-78.386	10.086	1052.308	-1.3647	0.37256	-0.8999	26.263	116.9988	1152.8388	-1.0752	0.64355	-1.4824	-8.051	32.20341	16.8064	0.20557	-0.13379	-0.00048828	-9.875	46.1117	48.783	0.12285	0.12578	0.15303	-49.438	83.4	102.3964	0.083789	-0.082617	-0.19473
1.154	-3.154	80.288	1281.6546	-1.1587	0.60693	-1.8257	-94.9969	25.1375	948.35	-1.6128	1.2915	-0.74951	-42.111	-45.33	1063.927	-1.5856	0.43155	-0.94736	-0.184999999999995	96.886	1130.1923	-1.0488	0.63574	-1.4414	8.836	31.83	23.2104	0.21289	-0.13452	0.0021973	0.552	75.942	39.924	0.13106	0.13291	0.15889	-31.937	92.2327	93.132	0.080566	-0.09082	-0.19482
1.156	-43.665	89.739	1240.6993	-1.1411	0.61963	-1.7964	-91.7127	-34.391	938.638	-1.5434	1.3897	-0.78272	-68.9135	-8.517	1049.915	-1.7683	0.52353	-0.98312	28.2353	171.675	1105.7205	-1.0225	0.625	-1.4004	-26.456	80.281	9.1175	0.21338	-0.14063	-0.0014648	-2.878	31.49576	33.867	0.14551	0.14072	0.16162	-63.635	82.2646	91.4483	0.075781	-0.094141	-0.20049
1.158	-33.8821	60.7462	1262.96	-1.126	0.62402	-1.7793	-43.656	-75.796	959.432	-1.4292	1.4438	-0.79932	-46.744	-39.955	1070.833	-1.8851	0.66143	-1.0171	-24.318	181.731	1089.54631	-1.0039	0.61719	-1.3789	-23.078	14.9903	39.716	0.21777	-0.14551	-0.0024414	14.272	61.162	45.7719	0.14629	0.13857	0.15547	-20.741	83.6072	103.684	0.073535	-0.094726	-0.20342
1.16	-0.686	78.027	1240.963	-1.0977	0.62891	-1.7295	-49.9782	-18.793	957.7764	-1.252	1.4609	-0.80078	5.875	-36.872	1082.551	-1.9156	0.83633	-1.0465	-20.776	196.06	1087.469	-0.96582	0.6123	-1.3418	-27.604	49.4909	28.5858	0.21484	-0.14648	-0.0014648	-20.951	55.017	28.189	0.14844	0.14063	0.16016	-52.738	88.23	61.8325	0.066504	-0.092774	-0.19873
1.162	-30.667	27.761	1207.1459	-1.0739	0.61743	-1.6844	-33.705	-43.0849	989.7817	-1.1831	1.4517	-0.79639	-12.329	-13.055	1075.1839	-1.8843	1.0454	-1.0737	-11.278	213.359	1027.057	-0.93701	0.60498	-1.3022	-48.9552	43.9474	23.973	0.21094	-0.14355	-0.0097656	-38.088	14.7981	46.489	0.14902	0.13653	0.15577	-70.7409	62.691	65.1095	0.063086	-0.081738	-0.20528
1.164	30.2174	33.279	1206.9674	-1.0542	0.60205	-1.6401	-32.126	-27.2207	1026.637	-1.1016	1.3789	-0.77246	23.411	-78.288	1078.1245	-1.7767	1.2108	-1.1161	-42.103	143.4508	995.5911	-0.90918	0.59961	-1.2686	-24.414	5.378	47.076	0.20313	-0.13599	-0.015625	10.411	67.938	33.98649	0.15322	0.13291	0.1584	-40.045	78.253	71.9575	0.055664	-0.07373	-0.2085
1.166	30.446	80.4721	1181.2591	-1.0352	0.57617	-1.5742	-61.582	-30.7434	1014.765	-1.0932	1.291	-0.7417	28.454	-64.8832	1081.429	-1.5939	1.3008	-1.1703	-15.046	153.1988	971.9795	-0.86914	0.58691	-1.2207	-48.276	65.1988	31.4153	0.20117	-0.13623	-0.021973	-38.742	35.317	14.5523	0.15322	0.12236	0.15527	-77.1648	76.563	59.456	0.055762	-0.058105	-0.21035
1.168	-2.804	67.524	1176.687	-1.0293	0.55664	-1.543	-11.219	-103.4786	1046.495	-1.1221	1.1807	-0.71289	-6.27	-76.596	1095.35008	-1.333	1.2945	-1.1735	-52.357	155.4778	935.494	-0.84326	0.58057	-1.1968	-35.284	13.694	35.5718	0.19971	-0.13086	-0.026367	-59.823	32.042	45.569	0.15	0.11914	0.14932	-53.43	39.755	76.001	0.05752	-0.04043	-0.21045
1.17	41.8674	102.3099	1173.613	-1.0181	0.52881	-1.4761	12.367	-83.648	1079.738	-1.1895	1.0566	-0.68359	-2.136	-80.293	1148.9	-1.0796	1.2245	-1.1429	-54.626	130.852	919.807	-0.79736	0.56104	-1.1401	-37.579	19.326342	28.8581	0.19971	-0.12354	-0.029297	-44.149	66.906	31.7064	0.14551	0.11279	0.14404	-30.078	40.9094	49.273	0.05752	-0.023242	-0.2085
1.172	5.03	99.0517	1103.666	-1.0017	0.51611	-1.4285	-33.594	-108.842	1106.656	-1.2246	1.0078	-0.67578	-49.055	-35.886	1154.3039	-0.90771	1.1196	-1.0991	-37.673	175.099	870.8636	-0.76391	0.54126	-1.0964	-85.202	60.4429	-2.665	0.19873	-0.11084	-0.037598	-64.782	18.1053	23.3957	0.14395	0.11025	0.1416	-61.631	33.307	33.9416	0.065332	-0.0078124	-0.21387
1.174	0.631999999999998	94.445	1081.02695	-0.98633	0.50488	-1.3809	-24.212	-126.238	1151.232	-1.2983	0.95947	-0.67529	-64.5985	-94.327	1150.233	-0.88037	0.98857	-1.0466	-84.97786	147.9162	821.289	-0.73438	0.52344	-1.0508	-48.8689	1.154	25.3855	0.19751	-0.096193	-0.042237	-44.689	43.2158	39.9589	0.14063	0.10722	0.14482	-25.525	42.3886	40.6089	0.074707	0.0063477	-0.21143
1.176	33.881	131.426	1073.8636	-0.94775	0.49072	-1.3257	-62.358	-114.119	1127.131	-1.3299	0.95435	-0.70191	-39.211	-170.08	1174.174	-0.9335	0.84775	-1.0067	-47.603	134.792	809.062	-0.68848	0.49023	-0.98438	-52.204	49.9043	33.6126	0.19727	-0.086914	-0.046387	-54.238	29.569	28.7456	0.13906	0.11152	0.14599	-50.9628	58.039	18.3962	0.087988	0.013379	-0.2082
1.178	-6.127	135.8035	1045.2223	-0.92285	0.48926	-1.2988	-57.886	-213.625	1117.661	-1.3452	0.95947	-0.74365	-65.586	-215.5423	1182.992	-1.0167	0.72236	-0.97744	-42.869	159.0546	793.933	-0.66748	0.4751	-0.95801	-57.698	38.4	14.384	0.19287	-0.07666	-0.066406	-84.7553	-5.3	45.369	0.13877	0.11807	0.14707	-57.524	33.6882	32.9262	0.099609	0.023535	-0.20215
1.18	-3.122	143.145	1044.616	-0.87305	0.47314	-1.248	-17.142	-274.723	1130.341	-1.3535	0.98828	-0.81445	-46.292	-284.289	1213.9556	-1.0969	0.62656	-0.95273	-105.5682	127.167	781.148	-0.62793	0.44531	-0.8877	-28.936	-2.4772	29.371	0.19287	-0.071777	-0.064453	-53.809	42.1319	43.9641	0.13916	0.12256	0.15186	-19.951	24.5734	37.9515	0.11406	0.028223	-0.1959
1.182	-13.835	158.412	999.028	-0.83056	0.46313	-1.2119	-36.113	-301.173	1138.029	-1.3633	1	-0.85547	-22.273	-258.755	1249.0908	-1.1655	0.56299	-0.93506	-63.65	152.0281	764.692	-0.59912	0.42578	-0.84668	-53.657	50.3556	13.995	0.19434	-0.066406	-0.075684	-82.9155	23.4124	12.614	0.13311	0.13418	0.15537	-73.5217	16.0565	12.616	0.12666	0.028809	-0.19316
1.184	-43.3717	115.3234	951.4235	-0.79492	0.45313	-1.1719	-23.973	-341.73	1178.28212	-1.4023	1.0273	-0.90674	-51.406	-253.526	1232.338	-1.2331	0.52842	-0.94717	-83.746	176.444	700.1773	-0.56396	0.40088	-0.79834	-44.936	12.603	36.3823	0.18165	-0.060547	-0.085205	-75.0576	26.7588	35.852	0.13858	0.1415	0.15664	-23.42	3.04	41.5682	0.14014	0.024414	-0.18066
1.186	9.762	130.95979	947.6792	-0.75098	0.42969	-1.1201	-30.939	-279.682	1216.104	-1.447	1.0515	-0.94605	11.862	-271.186	1253.471	-1.301	0.53301	-0.99102	-81.4138	159.6815	668.3945	-0.52393	0.37256	-0.73779	-17.858	32.493	38.8293	0.1709	-0.058105	-0.096191	-56.769	49.54	24.4367	0.14599	0.14189	0.16406	-35.659	32.796	30.374	0.15283	0.016406	-0.17344
1.188	-11.391	151.2643	899.1507	-0.73096	0.41748	-1.0933	-37.41	-275.1	1224.314	-1.4956	1.0825	-0.97998	8.692	-226.021	1274.653	-1.3619	0.56582	-1.0519	-24.632	192.753	634.485	-0.50732	0.35498	-0.71436	-48.3632	64.6752	19.144	0.15625	-0.05127	-0.10498	-86.811	-7.4071	26.81312	0.15273	0.14443	0.17451	-77.693	28.9385	31.2253	0.16797	0.017285	-0.15801
1.19	-48.915	130.416	872.1905	-0.70166	0.40088	-1.0269	7.39	-300.572	1255.0179	-1.5645	1.1328	-1.0293	2.063	-231.603	1346.0022	-1.4294	0.61739	-1.1185	-63.129	176.4247	581.69	-0.47363	0.32471	-0.65381	-30.429	-9.4549	18.9361	0.146	-0.04541	-0.11035	-54.51	27.044	43.048	0.15918	0.14697	0.18408	-5.416	24.9924	33.2064	0.17578	0.011426	-0.14395
1.192	-13.71	146.1723	826.928	-0.67456	0.38062	-0.98023	2.291	-240.23	1300.971	-1.5894	1.1587	-1.0542	18.569	-188.928	1431.772	-1.5034	0.67773	-1.1753	-35.474	171.6292	560.691	-0.44922	0.30029	-0.60986	-23.124	29.251	10.324	0.12646	-0.042969	-0.12158	-40.322	34.5546	22.653	0.1667	0.14512	0.18857	-26.077	39.373	4.034	0.18603	0.0040039	-0.13262
1.194	-86.05105	112.446	768.381	-0.64648	0.36426	-0.93066	-33.205	-237.228	1365.9266	-1.6401	1.2104	-1.0894	-46.4171	-147.906	1471.1285	-1.5864	0.73408	-1.2345	-25.839	196.956	539.88	-0.4248	0.27686	-0.56689	-50.804	27.3353	18.6316	0.10864	-0.032227	-0.13648	-58.9458	-4.156	32.471	0.17539	0.13672	0.196	-37.166	18.603	17.4524	0.1958	-0.0014648	-0.11816
1.196	-40.356	103.631	774.1995	-0.60303	0.34277	-0.87256	-48.222	-185.0036	1423.7397	-1.6795	1.2483	-1.1167	-60.0472	-148.0423	1507.157	-1.6742	0.78164	-1.2801	-63.4938	157.606	524.9893	-0.38916	0.24805	-0.51318	-2.08	-10.6286	31.559	0.089844	-0.024902	-0.14697	-20.456	42.3725	34.9848	0.18008	0.12539	0.20029	-7.221	19.8857	24.965	0.20713	-0.012988	-0.10537
1.198	-46.582	132.50381	760.6669	-0.58203	0.33496	-0.84229	-91.6414	-121.662	1446.634	-1.7168	1.2852	-1.1367	-47.713	-73.812	1508.6742	-1.7446	0.81758	-1.3145	-18.627	161.7617	493.5243	-0.375	0.23535	-0.48047	-26.786	50.868	12.686	0.069824	-0.0068359	-0.16797	-28.632	26.91206	-6.632	0.18672	0.11435	0.20352	-50.806	39.9866	20.171	0.21308	-0.023047	-0.095508
1.2	-99.13171	113.129	725.3485	-0.54248	0.31689	-0.78271	-81.0623	-130.644	1474.838	-1.771	1.3364	-1.1479	-82.2804	-51.281	1492.456	-1.8032	0.84532	-1.3422	-19.91	169.505	447.6112	-0.33057	0.21289	-0.43164	-27.367	4.483	12.6483	0.058594	-0.0019531	-0.17334	-11.147	16.6105	11.9853	0.18848	0.10742	0.20459	-27.71	26.257	29.1559	0.21895	-0.032422	-0.080664
1.202	-60.582	143.804	703.3025	-0.5105	0.3042	-0.73902	-44.468	-87.691	1462.714	-1.8008	1.3535	-1.1563	-35.956	-54.055	1508.667	-1.8359	0.86328	-1.3672	-26.808	151.4185	429.9164	-0.29638	0.20043	-0.38672	4.165	12.1549	25.695	0.03125	0.019043	-0.18311	5.844	50.387	8.6984	0.18223	0.10312	0.21074	-4.309	34.3636	28.6897	0.22285	-0.050293	-0.074219
1.204	-104.138	160.777	648.622	-0.48682	0.2915	-0.69238	-68.497	-112.936	1441.665	-1.8691	1.3848	-1.1641	-26.066	-41.766	1521.258	-1.8588	0.8957	-1.3844	-2.152	182.128	416.9076	-0.26025	0.18262	-0.34961	-16.691	57.3944	9.371	0.012939	0.022949	-0.19873	-31.614	9.4991	18.2108	0.17734	0.098243	0.21543	-65.096	23.8615	10.5165	0.22314	-0.066406	-0.05957
1.206	-79.9277	151.4097	630.4738	-0.45508	0.27295	-0.62305	-64.144	-156	1478.586	-1.9151	1.4082	-1.1699	-58.7233	-81.768	1560.163	-1.8815	0.9251	-1.4116	-44.1688	163.765	391.575	-0.21387	0.16357	-0.30273	-8.311	6.9827	21.2719	-0.012207	0.034668	-0.21045	3.963	37.0832	36.9111	0.16953	0.099024	0.2166	-20.482	9.2643	35.5303	0.21738	-0.08252	-0.05166
1.208	-30.42	167.68	619.7229	-0.43848	0.26465	-0.5918	-108.18038	-136.5911	1506.983	-1.958	1.4316	-1.166	-5.094	-104.1408	1604.3721	-1.9116	0.96455	-1.4355	-16.975	146.786789	399.75	-0.1958	0.1543	-0.28467	-20.092	53.577	24.7486	-0.039063	0.040527	-0.22998	6.347	37.89015	11.927	0.16601	0.10352	0.21592	-24.024	49.18	3.148	0.21182	-0.10196	-0.043262
1.21	-66.556	150.7706	565.7175	-0.40869	0.25342	-0.53711	-83.0966	-158.765	1539.5137	-2.0156	1.4453	-1.1719	-20.9161	-109.125	1618.7545	-1.9492	1.0099	-1.4694	3.362	154.618	390.69038	-0.15527	0.12695	-0.2334	-37.244	48.553	16.3549	-0.053223	0.041504	-0.2417	-23.102	3.896	25.09623	0.1626	0.11279	0.20557	-58.6068	41.7789	20.4783	0.19502	-0.11211	-0.038574
1.212	-42.91	127.9449	544.5636	-0.37695	0.23926	-0.48486	-39.378	-132.143	1574.8262	-2.0352	1.4492	-1.1709	10.5	-140.601	1646.585	-1.9917	1.0493	-1.4897	-9.223	121.32	374.809	-0.12817	0.10913	-0.20898	-9.662	-13.4305	56.493388	-0.10059	0.047852	-0.2627	11.381	46.813	26.045	0.15293	0.12305	0.20029	-17.392	48.754	31.2178	0.17871	-0.12636	-0.027734
1.214	-61.5919	152.111	505.782	-0.34717	0.22412	-0.43506	-43.564	-106.788	1563.098	-2.0562	1.4497	-1.1558	16.081	-95.347	1652.857	-2.0379	1.0918	-1.5066	15.534	110.946	358.115	-0.10352	0.088867	-0.17432	-38.262	37.067	68.108	-0.14599	0.043213	-0.27734	-29.741	30.8397	-8.8026	0.14492	0.1375	0.1916	-59.254	38.5829	-2.237	0.15869	-0.13281	-0.027344
1.216	-77.5505	125.484	486.978	-0.30566	0.2041	-0.38281	-14.854	-132.07	1584.8911	-2.0537	1.4384	-1.1484	-45.177	-65.86	1641.8037	-2.0785	1.1074	-1.5266	-27.507	129.46461	297.8829	-0.083984	0.068359	-0.13623	-36.4783	4.9869	81.231	-0.20313	0.035645	-0.30859	-17.362	27.8079	12.53232	0.13008	0.15274	0.17675	-31.806	14.258	24.245	0.14004	-0.13008	-0.023926
1.218	5.479	137.8424	474.8226	-0.28223	0.19873	-0.35352	-22.365	-94.22578	1608.257	-2.0352	1.4238	-1.1387	-18.491	-49.5922	1658.727	-2.1047	1.1203	-1.5278	-39.417	109.955	264.4003	-0.072266	0.062988	-0.11621	-6.854	14.1362	132.5776	-0.30029	0.013184	-0.33057	-7.722	63.964	-3.298	0.11582	0.16904	0.16612	-25.511	34.9364	21.969	0.12324	-0.12295	-0.026465
1.22	-30.2	155.491	421.759	-0.23486	0.17627	-0.3042	-89.1051	-70.2171	1599.336	-1.9941	1.4004	-1.1172	-39.888	-21.452	1664.12	-2.1129	1.1328	-1.5187	-19.206	126.4911	264.9912	-0.046875	0.041992	-0.080566	-25.6307	66.927	181.996	-0.36084	-0.0073242	-0.35645	-48.775	23.3635	4.151	0.095215	0.18701	0.15381	-52.826	34.036	28.6904	0.11543	-0.10498	-0.025293
1.222	-33.711	132.4932	412.4568	-0.20312	0.15454	-0.26709	-36.696	-66.1281	1623.995	-1.9727	1.3887	-1.1084	-44.908	-43.5076	1686.642	-2.1074	1.1328	-1.502	-55.6744	116.734	247.8315	-0.027588	0.034912	-0.05664	0.526999999999999	26.15306	291.389	-0.50586	-0.052734	-0.39893	-35.74	34.3602	42.1954	0.075098	0.20967	0.13887	-17.786	35.0731	43.886	0.11064	-0.087012	-0.032031
1.224	3.697	149.06	413.4454	-0.17383	0.13867	-0.23584	-42.522	-41.545	1619.674	-1.9194	1.3638	-1.0913	-36.604	-59.8535	1699.947	-2.0779	1.1197	-1.4795	-37.249	93.324	246.8803	-0.0083008	0.03125	-0.040527	-12.4551	73.872	415.987	-0.65992	-0.092283	-0.43726	-33.777	48.5937	3.528	0.046484	0.23701	0.12334	-62.447	63.758	9.2238	0.11279	-0.062988	-0.033691
1.226	-42.678	150.908	396.2997	-0.14063	0.11768	-0.19141	-58.9024	-74.2396	1586.0226	-1.8853	1.355	-1.0747	-41.417	-26.48	1641.5669	-2.0409	1.1001	-1.4468	-22.224	114.8888	217.225	0.015625	0.027344	-0.018555	-22.2325	86.038	548.202	-0.83398	-0.13232	-0.47754	-63.118	26.062	22.3746	0.024609	0.25928	0.10967	-65.6566	53.6806	15.1167	0.11699	-0.042481	-0.040527
1.228	-5.041	136.563	387.752	-0.12646	0.099609	-0.16553	-34.045	-67.244	1577.0634	-1.8535	1.3477	-1.0625	-39.082	-29.209	1599.3457	-2.0007	1.0685	-1.4128	-89.7551	112.6687	193.925	0.029785	0.026367	-0.01416	61.197	31.7527	697.043825	-1.1323	-0.17627	-0.52783	-46.658	76.88	33.281	0.0039063	0.28731	0.095215	-12.731	44.185	27.6881	0.12861	-0.022363	-0.042676
1.23	16.433	154.514	370.995	-0.095215	0.083984	-0.12012	-67.925	-11.396	1528.126	-1.8159	1.3325	-1.0483	-39.533	15.183	1572.883	-1.968	1.0441	-1.3856	-49.662	130.01	209.9409	0.048828	0.029785	0.0078125	22.32	72.674	812.049	-1.2988	-0.19043	-0.56445	-85.2206	55.671	25.52	-0.01416	0.31934	0.071777	-74.319	43.402	23.4883	0.14736	-0.0075195	-0.048926
1.232	-23.461	118.5494	346.845	-0.079345	0.072754	-0.089356	-40.43	-10.7883	1503.505	-1.7891	1.3194	-1.0269	-83.742	22.2989	1537.793	-1.9453	1.0273	-1.3613	-66.466	150.546	178.9025	0.068848	0.033448	0.022705	4.007	28.3407	919.991	-1.6519	-0.19141	-0.6499	-61.708	14.62275	58.839757	-0.028907	0.34883	0.051464	-46.476	19.4614	40.755	0.16074	0.0024414	-0.044238
1.234	12.923	114.5307	337.064	-0.056641	0.065918	-0.064941	-34.189	22.283	1492.699	-1.7656	1.3066	-1.002	-49.05	-4.3333	1539.24664	-1.9227	1.0231	-1.3418	-83.8231	110.2846	163.61933	0.084473	0.036621	0.035156	20.3605	7.4159	995.4623	-1.9217	-0.15601	-0.71949	-61.887	29.633	59.231	-0.037305	0.37783	0.022363	-37.785	37.937	19.306	0.1748	0.0083008	-0.04541
1.236	-21.208	130.8538	300.98	-0.032715	0.050293	-0.038086	-62.8929	13.8372	1470.115	-1.7383	1.2852	-0.97266	-48.448	10.2395	1528.816	-1.9027	1.0251	-1.3292	-18.511	102.276	156.2442	0.10205	0.043457	0.046387	-4.4352	28.32678	1034.9061	-2.1733	-0.080078	-0.78857	-99.2902	-8.6087	84.407	-0.048242	0.40361	-0.01084	-85.8819	46.4682	16.921	0.18594	0.011719	-0.042481
1.238	-9.572	100.152	273.7126	-0.020508	0.051758	-0.014648	-7.921	-33.909	1504.108	-1.7246	1.2715	-0.95898	-81.6859	-9.4999	1502.796	-1.8776	1.036	-1.3199	-71.026	87.2662	134.25	0.10303	0.046875	0.048828	9.228	-18.335	1089.529	-2.4448	0.10596	-0.90186	-60.522	19.1315	149.581	-0.059864	0.42666	-0.051758	-17.036	33.7484	42.329	0.19023	0.0089844	-0.04209
1.24	8.249	107.9926	277.072	0.01416	0.051758	0.0068359	-13.982	9.802	1494.817	-1.6831	1.2485	-0.93213	-43.341	-11.3688	1512.7125	-1.841	1.0551	-1.3145	-39.067	73.453	147.1529	0.11719	0.052246	0.057129	54.295	14.5803	1117.059	-2.52	0.24463	-0.94873	-88.4565	42.611	189.74	-0.077637	0.44629	-0.092285	-41.216	61.73	16.3774	0.19336	0.0039063	-0.03623
1.242	-40.59	108.021	266.435	0.050293	0.054199	0.027344	-29.306	22.224	1480.0465	-1.6492	1.2268	-0.91284	-82.4073	30.638	1473.186	-1.7964	1.0688	-1.3003	-37.19	89.7123	130.177	0.12305	0.060059	0.061524	-3.963	23.557	1125.439	-2.564	0.56885	-1.0522	-120.8351	17.9814	276.86	-0.098142	0.46533	-0.13389	-39.147	40.3135	18.7912	0.19453	0.0016602	-0.034766
1.244	-20.245	73.178	243.9768	0.066406	0.054199	0.033203	-46.443	35.939	1487.3805	-1.6152	1.207	-0.89355	-70.904	10.4716	1462.874	-1.7555	1.0746	-1.2939	-89.16449	81.165	103.605	0.13232	0.062988	0.063477	-7.072	-12.027	1171.554	-2.5424	0.896	-1.1265	-65.483	64.878	393.94	-0.12442	0.47442	-0.17617	-6.472	40.818	27.7212	0.19482	-0.0078125	-0.032227
1.246	-33.693	102.299	218.8	0.10645	0.048828	0.049805	-70.494	73.11	1455.4641	-1.5718	1.1782	-0.86865	-36.234	24.3437	1462.418	-1.7164	1.0777	-1.2779	-17.794	62.0193	95.0587	0.13281	0.070313	0.069336	-19.233	25.098	1203.195	-2.5073	1.1841	-1.2476	-95.127	60.906	521.451	-0.15762	0.46894	-0.21797	-49.571	56.7568	25.137	0.20215	-0.013379	-0.033203
1.248	-60.1967	97.6728	202.8078	0.12695	0.050782	0.047607	-79.17681	33.607	1447.3178	-1.5503	1.1626	-0.86084	-95.9661	6.56	1428.3241	-1.6785	1.0703	-1.2603	-38.616	71.923	82.176	0.13525	0.074219	0.070313	14.349	-28.235	1230.3725	-2.2852	1.3652	-1.4297	-67.804	57.72368	689.9527	-0.20244	0.45879	-0.2789	-31.48	27.3888	59.294	0.20342	-0.018164	-0.032422
1.25	-30.082	88.1189	218.452	0.14746	0.046387	0.049316	-73.345	33.5297	1444.9513	-1.5024	1.1333	-0.83936	-57.9498	-11.138	1423.889	-1.6403	1.0561	-1.2419	-28.783	46.3134	100.468	0.13525	0.085449	0.075684	56.5337	-38.877	1276.497	-2.0371	1.3711	-1.4688	-45.945	92.001	824.096	-0.26123	0.43799	-0.34814	-16.059	38.891	41.8874	0.21084	-0.023243	-0.033594
1.252	-60.5766	121.5056	198.9245	0.1709	0.047363	0.059082	-80.1079	8.9542	1413.9688	-1.4707	1.1113	-0.82226	-43.943	45.2503	1382.9027	-1.5952	1.0317	-1.2222	7.169	49.034	91.4199	0.13696	0.095461	0.085938	13.664	-10.0845	1266.961	-1.4219	1.2578	-1.4531	-85.394	63.258	926.915	-0.34414	0.40937	-0.43594	-49.897	31.3562	33.1325	0.21758	-0.028516	-0.034277
1.254	-71.6561	85.245	184.2361	0.17725	0.043945	0.061523	-43.649	-34.6899	1400.541	-1.4355	1.084	-0.81445	-63.084	48.763	1340.5388	-1.5498	1.0061	-1.2021	-39.597	67.1797	76.5188	0.13721	0.10693	0.090332	23.036	-17.952	1282.09	-1.0613	1.1023	-1.4187	-80.525	66.702	1035.756	-0.44697	0.37295	-0.51787	-26.93	15.9224	36.07386	0.21875	-0.031738	-0.033691
1.256	-46.869	96.6937	155.1283	0.18018	0.041992	0.068359	-75.364	22.79	1366.7442	-1.3965	1.0469	-0.80371	-34.504	33.846	1346.8899	-1.5019	0.97304	-1.1813	-16.729	40.916	90.332	0.13965	0.11914	0.095215	-45.421	47.476	1310.4049	-0.82813	0.91992	-1.3848	-83.146	54.0377	1108.54743	-0.58525	0.33701	-0.596	-32.392	56.535	18.679	0.22509	-0.038672	-0.037012
1.258	-76.3508	103.18001	130.803	0.18018	0.046143	0.06958	-75.6839	19.251	1326.90269	-1.373	1.0273	-0.78516	-49.186	49.357	1309.229	-1.4582	0.93867	-1.1562	0.697000000000003	74.432	51.283	0.14648	0.12939	0.099609	-84.011	62.078	1319.946	-0.71875	0.65234	-1.3496	-91.035	-13.506	1177.485	-0.75401	0.29893	-0.67627	-59.8173	26.904	31.0042	0.22871	-0.045703	-0.040918
1.26	-39.58	65.879	135.0667	0.18213	0.050293	0.075195	-43.594	31.242	1321.593	-1.3359	0.99609	-0.77441	-52.423	26.823	1275.29659	-1.4127	0.9123	-1.1322	-25.511	64.9164	36.3845	0.15527	0.13721	0.10693	-35.898	4.946	1333.7849	-0.70215	0.54443	-1.3335	-58.308	-26.205	1183.968	-0.95117	0.27246	-0.73242	-24.176	26.668	43.452	0.22988	-0.05586	-0.044824
1.262	-37.246	99.894	107.287	0.18164	0.053711	0.080566	-55.146	85.739	1298.293	-1.3086	0.97168	-0.76269	-21.912	65.6333	1268.4476	-1.373	0.88477	-1.1133	15.32	45.11	35.8607	0.16407	0.13672	0.10791	-56.872	-44.446	1317.431	-0.68115	0.37646	-1.2964	-98.283	-64.85186	1133.401	-1.1644	0.28633	-0.77168	-41.997	32.9163	23.85799	0.2293	-0.060645	-0.050098
1.264	-74.2298	71.632	94.789	0.17773	0.058105	0.077637	-48.536	74.494	1274.7476	-1.2827	0.95459	-0.75342	-57.9374	118.444	1228.4048	-1.3312	0.85908	-1.0858	-2.907	73.08	13.373	0.16699	0.13623	0.11084	-79.7728	-139.105	1323.906	-0.69214	0.30688	-1.2732	-79.72119	-99.672	1134.255	-1.3831	0.32871	-0.79502	-21.967	10.458	47.164	0.22949	-0.066895	-0.055176
1.266	-40.351	46.3804	107.581	0.18115	0.0625	0.075195	-28.353	136.963	1259.9893	-1.251	0.93164	-0.73438	-27.362	121.638	1244.301	-1.2953	0.83907	-1.0633	-36.063	42.2075	29.6719	0.17969	0.12842	0.12012	-74.0347	-169.593	1357.441	-0.71826	0.26416	-1.2769	-39.156	-73.389	1141.481	-1.6022	0.42832	-0.80634	-12.858	23.0581	45.8011	0.22285	-0.075293	-0.065137
1.268	-63.70581	74.757	91.513	0.17871	0.065674	0.072265	-56.1511	167.446	1213.5997	-1.2324	0.91992	-0.72656	-28.927	171.994	1200.677	-1.2656	0.82031	-1.0461	-6.377	39.581	35.5608	0.18359	0.12207	0.12305	-111.1279	-147.249	1382.9376	-0.75928	0.25342	-1.314	-69.3666	-103.148	1143.556	-1.7856	0.58672	-0.81269	-54.083	32.3535	14.254	0.21846	-0.083496	-0.072656
1.27	-45.7674	46.053	98.2537	0.17725	0.069336	0.068848	-56.4495	146.485	1214.022	-1.1997	0.89795	-0.71631	-49.3908	153.114	1141.74	-1.2384	0.79756	-1.0288	-45.755	34.4717	10.8916	0.17969	0.10352	0.125	-79.759	-153.826	1366.939	-0.7832	0.26709	-1.3359	-51.335	-114.751	1143.5794	-1.9097	0.79541	-0.80811	-17.747	20.921	46.032	0.20791	-0.083496	-0.085547
1.272	-4.184	49.2784	78.6327	0.17139	0.070801	0.064453	-63.998	178.782	1189.2687	-1.1713	0.87891	-0.708	12.473	134.5171	1134.6878	-1.2173	0.77148	-1.0078	-11.384	5.097	28.4085	0.17236	0.089111	0.1294	-35.794	-140.33	1340.3287	-0.81738	0.32227	-1.3711	-32.118	-132.749	1096.951	-1.9688	1.0444	-0.80361	-51.269	47.693	25.4818	0.19326	-0.086133	-0.10176
1.274	-51.178	75.138	68.1943	0.16309	0.06543	0.060547	-36.764	139.3525	1138.68111	-1.1421	0.85693	-0.69678	-19.467	163.52	1112.977	-1.204	0.74483	-0.98721	-14.227	39.978	20.4667	0.16846	0.072266	0.13428	-56.7046	-156.148	1329.078	-0.88281	0.37305	-1.3965	-47.772	-197.73	1108.6954	-1.9469	1.2751	-0.83193	-50.427	18.3812	39.567	0.17627	-0.08252	-0.11816
1.276	-26.294	28.3139	71.5985	0.15039	0.066895	0.056152	-3.813	110.6449	1128.4071	-1.1094	0.82764	-0.68066	-7.756	132.528	1098.885	-1.1903	0.72227	-0.96563	-57.57	28.8151	21.6533	0.15234	0.049316	0.13965	-45.703	-188.339	1380.403	-0.93994	0.39111	-1.4058	-22.877	-163.347	1170.423	-1.8442	1.4395	-0.88389	-17.511	12.0533	33.7157	0.15918	-0.068555	-0.13408
1.278	-13.958	54.576	53.407	0.13501	0.065674	0.05127	-10.864	146.468	1073.654	-1.0977	0.80859	-0.6709	-2.513	153.3449	1076.3298	-1.1699	0.70195	-0.94219	-21.859	15.2848	27.1722	0.15137	0.044922	0.14209	-58.928	-135.332	1443.701	-1.1011	0.40576	-1.4312	-70.855	-132.133	1169.921	-1.6632	1.5316	-0.92617	-68.9266	35.0209	-4.639	0.14287	-0.049023	-0.14717
1.28	-30.402	46.5487	44.7528	0.11914	0.064453	0.049805	-27.536	110.4089	1047.124	-1.0645	0.77734	-0.64746	-34.402	167.2541	1000.624	-1.1466	0.68194	-0.91729	-59.4722	40.618	-4.1095	0.14111	0.033691	0.14502	-70.1	-130.798	1475.4555	-1.2439	0.4231	-1.4558	-90.298	-131.981	1203.546	-1.4565	1.5591	-0.93506	-48.574	18.4202	17.6553	0.12334	-0.035742	-0.16279
1.282	27.317	12.284	48.4175	0.098145	0.064941	0.040039	-16.293	146.076	1014.12	-1.0442	0.74683	-0.63452	11.685	138.438	977.241	-1.123	0.66211	-0.89844	-69.5867	21.1486	13.1383	0.13134	0.030029	0.15088	-14.115	-97.2316	1451.202	-1.3789	0.44727	-1.4805	-72.07	-107.08	1165.679	-1.317	1.4986	-0.88925	-37.264	46.605	16.94	0.10459	-0.0087891	-0.17871
1.284	1.919	61.475	29.973	0.086426	0.066406	0.037598	0.760000000000002	147.125	938.484	-1.0132	0.71729	-0.62158	6.851	192.31186	959.581	-1.0946	0.64385	-0.87647	-37.798	20.1768	24.7369	0.12695	0.035156	0.15381	-31.7386	-53.462	1405.669	-1.4844	0.49219	-1.5273	-120.322	-210.205	1129.58	-1.2819	1.3568	-0.8251	-70.0401	43.0928	16.7527	0.083984	0.01123	-0.19971
1.286	-16.78	25.7743	31.7515	0.072266	0.079102	0.033203	18.73	107.649	939.7113	-0.97266	0.67969	-0.59668	-23.941	181.504	931.3857	-1.0606	0.62852	-0.86113	-65.2425	39.7997	6.02	0.12695	0.045898	0.16455	-28.8271	-84.921	1376.74	-1.5117	0.51172	-1.5508	-99.7583	-288.3527	1192.28	-1.3476	1.1599	-0.74541	-17.546	6.174	45.8076	0.069824	0.033496	-0.20596
1.288	-0.458999999999996	36.15	12.504	0.065185	0.088867	0.031006	13.537	149.0139	916.0184	-0.94727	0.66211	-0.58301	-15.579	174.968	931.7669	-1.0297	0.61055	-0.84121	-55.9387	21.721	18.763	0.125	0.050293	0.16406	-16.057	-55.422	1403.037	-1.5176	0.54492	-1.5977	-62.3515	-289.562	1227.929	-1.4682	0.96838	-0.67969	-42.525	22.5598	36.199	0.047461	0.055176	-0.22441
1.29	-36.499	67.278	-4.934	0.061523	0.094727	0.032227	-4.631	130.702	892.3871	-0.88916	0.62939	-0.56201	-36.323	210.689	883.196	-0.99553	0.59121	-0.82149	-50.751	49.7429	20.0157	0.13135	0.069824	0.17139	-31.0819	-31.278	1427.515	-1.5247	0.5647	-1.6463	-80.6467	-345.044	1262.667	-1.6108	0.82275	-0.63037	-61.32017	3.161	72.8188	0.033789	0.077832	-0.24356
1.292	-0.545000000000002	18.8667	19.1632	0.070801	0.11328	0.035156	9.374	158.3284	891.177	-0.8457	0.59912	-0.5415	-37.7315	169.031	849.69655	-0.95752	0.56885	-0.8042	-96.342	53.4697	20.324982	0.13575	0.077393	0.18189	37.05284	-48.211	1467.1967	-1.543	0.58008	-1.6963	-30.091	-340.214	1302.5935	-1.7238	0.73203	-0.60547	-4.387	20.4283	105.0101	0.021484	0.096191	-0.25918
1.294	-12.217	53.181	9.4429	0.076172	0.12256	0.03418	-18.401	229.899	839.2548	-0.79443	0.57275	-0.52295	-6.371	188.495	824.3029	-0.92549	0.54971	-0.77823	-29.366	37.56073	44.569	0.14404	0.085449	0.1875	57.784	-29.097	1486.539	-1.5815	0.60693	-1.7651	-20.783	-347.593	1270.061	-1.7903	0.68242	-0.61563	-36.226	54.598	124.399	0.0029297	0.11084	-0.27539
1.296	-49.794	37.4889	13.9902	0.086426	0.13477	0.039551	-5.185	194.2609	823.425	-0.73828	0.53809	-0.49609	-37.9886	212.268	757.88	-0.89092	0.52511	-0.7542	-36.502	69.873	1.8356	0.15039	0.094727	0.20264	38.642	-64.571	1467.173	-1.6206	0.61963	-1.7935	5.966	-362.644	1302.674	-1.8152	0.66992	-0.66875	-31.711	30.4911	180.2069	-0.014063	0.11367	-0.29688
1.298	-11.082	8.3139	26.4945	0.09839	0.14233	0.04541	20.812	221.268	763.55704	-0.70459	0.51221	-0.48682	-9.348	177.891	747.3414	-0.85108	0.4962	-0.7292	-71.0042	42.34866	6.1272	0.15381	0.099121	0.21338	105.962	-79.105	1475.83	-1.6719	0.64063	-1.8516	40.878	-267.82	1380.947	-1.7923	0.68662	-0.74189	-0.5	36.461	266.713	-0.041699	0.11562	-0.31553
1.3	-46.4192	58.743	-5.605	0.11182	0.14746	0.054688	-12.728	219.832	696.749	-0.64795	0.47119	-0.45654	-28.742	225.982	718.498	-0.81348	0.46661	-0.70586	-21.63	38.383	26.9704	0.16504	0.098145	0.22852	68.6007	-49.843	1480.986	-1.698	0.67017	-1.8767	-4.406	-253.13	1444.132	-1.7651	0.7251	-0.82178	-5.3969	41.0038	394.64	-0.080371	0.1125	-0.33466
1.302	-44.984	28.6192	20.3497	0.13623	0.1499	0.063477	-0.036999999999999	191.217	699.989	-0.60693	0.43188	-0.43848	-39.9741	188.5964	687.653	-0.76904	0.43994	-0.67529	-62.3994	58.0414	10.983	0.17188	0.090332	0.24219	62.952	-67.546	1532.189	-1.7124	0.69775	-1.9077	-20.123	-247.146	1548.131	-1.7572	0.77724	-0.90283	31.9792	40.8846	576.709	-0.14336	0.096485	-0.35518
1.304	-16.113	33.639	19.8654	0.14502	0.14111	0.069336	-10.2	227.66	675.856	-0.56592	0.39404	-0.41943	1.979	156.8193	691.3345	-0.72918	0.40673	-0.65419	-29.509	14.523	44.294	0.17334	0.084961	0.24512	90.267	-21.8532	1553.743	-1.7104	0.729	-1.937	-48.393	-197.94	1560.319	-1.7757	0.84033	-0.97079	15.5021	94.175	728.475	-0.22998	0.061523	-0.38281
1.306	-60.244	55.654	2.4652	0.16992	0.12939	0.082031	-19.024	174.2138	644.4048	-0.52051	0.34082	-0.39551	-18.633	194.7154	633.7129	-0.68385	0.37634	-0.62703	-11.875	34.9068	25.9827	0.17822	0.079102	0.25098	32.6148	-13.434	1502.464	-1.6973	0.72656	-1.9473	-71.9958	-216.573	1536.9078	-1.8202	0.89658	-1.0294	29.486	77.885	869.807	-0.32891	0.018945	-0.42031
1.308	-35.902	0.0589999999999993	11.1122	0.18432	0.11963	0.091553	-12.103	145.678	613.8312	-0.49756	0.31982	-0.38525	-27.378	145.4758	598.249	-0.63696	0.34509	-0.59811	-46.626	31.495	37.74009	0.17578	0.073486	0.25366	50.125	-29.6258	1505.817	-1.6738	0.72266	-1.9531	-36.719	-154.436	1544.309	-1.8828	0.93047	-1.0707	64.098	50.379	1017.93	-0.45059	-0.02998	-0.46718
1.31	-59.811	42.148	7.9431	0.19824	0.10986	0.10449	-40.002	183.5663	550.938	-0.44531	0.27246	-0.36035	-13.529	176.242	581.8929	-0.59947	0.31677	-0.57448	6.905	14.8345	45.925	0.1709	0.071777	0.25537	33.1012	18.3741	1477.607	-1.6561	0.70825	-1.9422	-64.61	-110.186	1506.788	-1.937	0.95752	-1.0991	28.28662	53.035	1115.181	-0.60566	-0.083496	-0.51836
1.312	-80.3205	50.2977	12.15641	0.21289	0.094238	0.1084	-40.089	151.992	539.604	-0.40869	0.23926	-0.34424	-52.7086	195.202	537.8893	-0.5625	0.28711	-0.5498	-20.381	52.6	26.1169	0.16797	0.069824	0.25879	46.45	29.5516	1448.0527	-1.6401	0.68799	-1.9272	-64.164	-152.414	1532.951	-1.9834	0.98535	-1.1123	25.50409	1.007	1201.5595	-0.8042	-0.14277	-0.58633
1.314	-31.443	17.069	38.652	0.21631	0.084473	0.11523	-12.524	207.787	550.7578	-0.37354	0.20508	-0.32617	-27.397	137.6092	525.9601	-0.52174	0.25202	-0.52251	-14.649	38.57016	27.0852	0.16504	0.074707	0.25586	81.373	36.9975	1445.282	-1.605	0.65479	-1.8999	-57.627	-100.863	1547.986	-2.0156	1.0153	-1.1243	30.277	-0.932000000000002	1251.583	-1.0547	-0.19482	-0.6377
1.316	-68.2065	61.2351	22.7849	0.22656	0.064453	0.11816	-55.9882	219.224	514.197	-0.3291	0.16602	-0.30273	-18.149	180.955	504.3218	-0.48724	0.21847	-0.49494	16.278	28.132	37.5572	0.16797	0.087402	0.25049	13.0081	64.956	1401.2542	-1.5933	0.6333	-1.8804	-52.2955	-147.013	1554.855	-2.0348	1.0492	-1.134	-10.203	-2.432	1275.745	-1.3588	-0.22617	-0.68867
1.318	-62.4685	31.524	31.71155	0.22924	0.058594	0.12207	-41.285	161.744	522.318	-0.30469	0.14893	-0.28955	-40.4424	141.2979	485.3328	-0.44936	0.18606	-0.4732	-42.24	42.0399	29.45	0.16381	0.1023	0.24292	43.431	37.8857	1391.07	-1.5449	0.57422	-1.8418	-10.055	-179.016	1629.3431	-2.0632	1.09	-1.1542	19.798	-59.4051	1316.586	-1.7038	-0.2458	-0.7624
1.32	-32.44	37.172	31.5884	0.23096	0.050781	0.12549	-18.675	187.984	495.681	-0.25732	0.11621	-0.27002	-12.863	116.3279	491.212	-0.41329	0.15782	-0.44648	-8.794	0.167999999999999	51.7971	0.16455	0.11475	0.23096	31.875	54.26	1379.7091	-1.5134	0.53345	-1.8113	-2.151	-154.747	1646.682	-2.0933	1.1401	-1.1812	-33.734	-67.342	1290.785	-2.0581	-0.24033	-0.84091
1.322	-58.9042	79.71	16.8014	0.23047	0.044922	0.12354	-55.15897	131.609	459.1685	-0.22094	0.098877	-0.26636	-31.265	171.5964	432.1398	-0.38086	0.125	-0.41504	-0.893000000000001	26.4752	18.014	0.16064	0.14111	0.20898	7.273	89.2591	1352.6551	-1.4819	0.49854	-1.7905	-35.493	-195.255	1664.628	-2.1403	1.194	-1.2115	-73.599	-108.82	1303.516	-2.4228	-0.1834	-0.92852
1.324	-19.091	31.92847	39.52	0.22412	0.044434	0.12061	-40.553	130.3	464.423	-0.19043	0.078125	-0.26074	-36.542	125.314	399.043	-0.35259	0.10253	-0.39252	-56.2542	38.6155	15.071	0.1626	0.15381	0.20117	35.042	85.7532	1319.4368	-1.4429	0.4751	-1.7534	-46.235	-149.755	1691.655	-2.1836	1.2449	-1.239	5.114	-100.8517	1342.9129	-2.7495	-0.060547	-1.019
1.326	-33.314	54.67	14.08016	0.21533	0.038574	0.11963	-29.949	180.0634	397.7663	-0.13477	0.036621	-0.2251	-10.941	148.5909	367.141	-0.32003	0.078771	-0.37531	-19.017	26.5273	39.0455	0.15381	0.18311	0.16943	-6.863	110.7514	1291.634	-1.4229	0.47168	-1.7461	-78.247	-101.8557	1669.97	-2.2242	1.2965	-1.2562	-41.133	-70.2651	1307.3216	-2.9872	0.18623	-1.1056
1.328	-47.596	43.6897	10.4425	0.20239	0.041016	0.11157	-26.369	121.803	365.1222	-0.11328	0.013184	-0.21094	-28.005	154.6964	322.903	-0.28967	0.054965	-0.35379	-42.777	69.589	10.291	0.14917	0.20215	0.15039	-64.721	95.8598	1261.317	-1.3784	0.46729	-1.7183	-102.6745	-136.1304	1697.087	-2.2615	1.34	-1.2685	-29.023	-119.462	1331.165	-3.1496	0.60352	-1.1652
1.33	-9.95200000000001	1.147	35.848	0.18701	0.044434	0.104	-24.144	156.8042	335.4917	-0.083008	-0.016602	-0.20508	-14.912	84.097	337.7213	-0.25252	0.038832	-0.33224	-46.055	38.8314	11.6701	0.14111	0.22754	0.12793	-47.1478	58.21036	1288.0175	-1.3326	0.47216	-1.6939	-94.0193	-90.893	1722.157	-2.2871	1.3789	-1.2734	-13.079	-92.723	1332.234	-3.2688	1.0922	-1.2984
1.332	-20.317	47.0205	21.765	0.16309	0.057129	0.083008	-32.317	136.6267	311.709	-0.059326	-0.043213	-0.19433	-15.663	138.6944	304.91	-0.22559	0.019531	-0.31348	-9.976	19.162	25.127	0.13184	0.25635	0.089355	-53.833	78.747	1276.7998	-1.293	0.47559	-1.6758	-101.06	-121.738	1681.879	-2.2814	1.3962	-1.2688	-99.604	-72.873	1346.6726	-3.2116	1.4247	-1.5108
1.334	-10.776	12.836	43.8326	0.15332	0.064453	0.077637	-18.965	89.402	320.2231	-0.037109	-0.070801	-0.18311	-63.8965	110.1482	280.9426	-0.19593	-0.0045196	-0.28915	-63.8017	33.13151	28.123	0.125	0.26416	0.072266	-48.6106	35.765	1260.808	-1.228	0.46289	-1.6362	-83.104	-123.1714	1689.964	-2.2711	1.4013	-1.2637	-92.693	-39.699	1419.705	-2.7905	1.5708	-1.6421
1.336	-1.092	20.603	50.865	0.13086	0.095215	0.050293	-31.353	139.0654	285.9479	-0.010742	-0.10254	-0.1748	-38.772	93.0064	287.3702	-0.17175	-0.025929	-0.26912	-55.717	-16.4023	70.731	0.10156	0.29736	0.014648	-15.997	56.2839	1236.4526	-1.1987	0.46924	-1.6108	-68.7683	-36.407	1638.794	-2.2367	1.392	-1.2449	-129.6681	24.32	1407.6197	-2.0756	1.5381	-1.6248
1.338	-21.386	55.531	31.744125	0.11279	0.12573	0.02832	-31.494	104.7182	253.762	0	-0.11426	-0.17285	-41.737	152.512	253.7898	-0.14939	-0.046536	-0.24867	-35.218	-5.2672	69.1788	0.075927	0.31519	-0.029053	-58.0698	96.653	1166.799	-1.1597	0.45752	-1.5718	-87.105	-70.138	1602.2777	-2.2006	1.3729	-1.2205	-160.2085	-32.677	1383.6198	-1.414	1.404	-1.5554
1.34	-2.916	4.4579	34.2462	0.09668	0.16211	0.0092773	-6.429	119.8131	263.40584	0.02002	-0.13818	-0.16211	-41.076	98.8523	224.7954	-0.12717	-0.064866	-0.22978	-83.0126	-5.73181	62.9176	0.047363	0.3335	-0.06543	-27.95	85.667	1164.7281	-1.1401	0.44922	-1.5332	-53.927	-41.419	1589.5586	-2.1636	1.3423	-1.1909	-114.4565	-90.482	1369.793	-0.96514	1.1442	-1.4698
1.342	-9.724	22.998	20.7432	0.074707	0.20654	-0.022461	-19.392	145.258	233.624	0.023438	-0.14306	-0.16431	-39.755	132.977	206.817	-0.11719	-0.079102	-0.20508	-42.354	-21.8233	93.124	-0.015625	0.35205	-0.12891	-12.916	143.315	1146.895	-1.1265	0.43799	-1.4956	-48.995	-28.1941	1541.372	-2.1256	1.3131	-1.1631	-141.705	-142.23204	1338.843	-0.72481	0.81347	-1.3998
1.344	-27.053	26.2424	16.0843	0.066895	0.23291	-0.037598	-22.548	84.3115	234.5175	0.029785	-0.15234	-0.16504	-51.5312	139.02	174.229	-0.10442	-0.097242	-0.19149	-78.5332	10.291	106.114	-0.049316	0.35986	-0.15771	-26.771	134.544	1121.2132	-1.0996	0.42969	-1.4453	-52.615	-61.293	1570.382	-2.0878	1.2849	-1.1331	-133.054	-210.867	1396.825	-0.604	0.52881	-1.3413
1.346	13.637	-6.4277	37.2739	0.054199	0.27002	-0.065918	-6.745	121.842	216.7849	0.025391	-0.15918	-0.1582	-28.544	68.473	200.1349	-0.086989	-0.11834	-0.17563	-75.089	-12.84	164.2866	-0.13574	0.37744	-0.22852	14.102	120.911	1113.586	-1.0879	0.43359	-1.418	-21.891	21.309	1557.1697	-2.0499	1.2555	-1.1069	-98.809	-210.731	1424.8508	-0.56406	0.375	-1.3022
1.348	-28.115	40.4118	20.418	0.04541	0.30225	-0.086426	-30.002	113.296	182.2165	0.028809	-0.15479	-0.16162	-45.446	127.9739	181.4347	-0.07147	-0.13582	-0.16365	-56.002	-6.4126	246.022	-0.20508	0.38574	-0.2837	7.512	161.94	1063.8713	-1.041	0.43066	-1.3672	-61.5895	8.4896	1511.16	-2.0049	1.2368	-1.0835	-117.66705	-256.3	1392.019	-0.56445	0.30049	-1.2726
1.35	-41.634	13.443	29.9357	0.036133	0.32861	-0.11475	-20.446	70.57468	191.4295	0.022461	-0.14941	-0.16162	-55.73	93.245	144.482	-0.056128	-0.15086	-0.15714	-103.0113	24.092598	309.421	-0.28711	0.38477	-0.34424	-23.344	149.369	1030.222	-0.99804	0.42725	-1.3345	-62.248	8.5016	1505.665	-1.9546	1.2192	-1.0601	-69.761	-295.042	1388.1839	-0.58906	0.25752	-1.2777
1.352	-12.445	13.2048	26.577	0.022461	0.36572	-0.15381	-9.98200000000001	118.375	154.187	0.011719	-0.14551	-0.16186	-32.471	72.248	153.0605	-0.038574	-0.16113	-0.15625	-56.998	15.519	424.439	-0.42773	0.39258	-0.4375	-26.326	180.01	1003.941525	-0.95459	0.43066	-1.2964	-60.5876	60.684	1479.646	-1.9035	1.1996	-1.0375	-59.377	-262.078	1389.048	-0.62275	0.24092	-1.312
1.354	-52.899	56.9294	-2.429	0.02002	0.37988	-0.17578	-38.628	57.52	119.228	0.0068359	-0.1416	-0.16211	-48.53	133.602	127.337	-0.025343	-0.16391	-0.15594	-10.121	54.7322	546.966	-0.50684	0.39453	-0.48242	-50.066	198.54	960.596	-0.89795	0.42139	-1.2476	-64.428	-2.349	1458.7697	-1.8437	1.1769	-1.0159	-68.442	-275.13	1461.221	-0.63623	0.24609	-1.3647
1.356	-22.164	20.47403	15.3446	0.00048828	0.41846	-0.21436	-28.17	46.014	124.618	-0.0014648	-0.12061	-0.16162	-55.152	79.6547	127.2175	-0.01358	-0.16805	-0.15707	-50.488	84.704	651.042	-0.69385	0.3916	-0.5625	-12.711	148.2722	950.566493	-0.87207	0.42188	-1.2207	-20.768	3.476	1476.8228	-1.7846	1.1483	-0.99599	-15.22	-230.971	1537.9513	-0.62871	0.25898	-1.3957
1.358	-37.44	47.92	9.132	-0.016846	0.44361	-0.2439	-24.13	69.581	105.479	-0.0083008	-0.11768	-0.15479	-44.894	109.915	119.9593	-0.0084902	-0.16859	-0.1543	-23.534	82.841	782.1752	-0.86157	0.39331	-0.62085	-28.423	153.997	900.334	-0.82422	0.40967	-1.1719	-37.777	3.756	1441.1341	-1.7338	1.1229	-0.97246	-36.622	-178.8752	1533.115	-0.6169	0.275	-1.4054
1.36	-78.85848	33.7317	12.296	-0.035156	0.47266	-0.27539	-48.92	10.503	115.4198	-0.020508	-0.10498	-0.15039	-55.1018	121.825	94.328	-0.0059229	-0.16901	-0.1554	-42.965	114.499	839.469	-1.0347	0.41455	-0.67041	-50.8374	133.3395	857.737	-0.78735	0.40259	-1.1233	-33.929	-47.157	1429.315	-1.6934	1.0947	-0.95996	-47.1253	-165.3837	1536.972	-0.6337	0.27461	-1.4105
1.362	-29.673	-9.0688	27.4782	-0.061523	0.4917	-0.31836	-29.66	71.6019	108.3105	-0.028564	-0.09082	-0.14697	-53.057	50.41076	111.5063	-0.0063477	-0.16309	-0.15332	-80.489	73.69	928.478	-1.2676	0.4707	-0.73242	-9.949	128.8343	878.18876	-0.75391	0.39307	-1.082	4.839	10.831	1386.346	-1.6567	1.0647	-0.93936	3.12432	-95.019	1505.3242	-0.70909	0.26123	-1.4196
1.364	-51.529	25.9766	35.468	-0.077148	0.49854	-0.33105	-48.264	74.438	75.8339	-0.032227	-0.072754	-0.14893	-68.58	97.705	115.515	-0.0060639	-0.15358	-0.15171	-59.725	47.7452	984.455	-1.376	0.51172	-0.75	-47.168	177.028	829.358	-0.71191	0.37695	-1.0127	-23.99	1.422	1340.6662	-1.6195	1.0348	-0.92207	-34.5066	-95.519	1489.059	-0.84619	0.25439	-1.4409
1.366	-72.95884	-20.13714	45.626	-0.11572	0.51953	-0.37305	-53.29	47.0059	88.9809	-0.040039	-0.060059	-0.146	-43.661	70.1332	91.8932	-0.0098188	-0.14072	-0.15582	-89.64	28.1675	993.425	-1.5645	0.63867	-0.78906	-32.617	139.661	783.848	-0.6875	0.36719	-0.99023	-33.803	-2.32100000000001	1318.941	-1.5844	1.0082	-0.90488	-5.65199999999999	-93.703	1529.4401	-1.0408	0.27422	-1.4779
1.368	-42.519	-25.7877	85.126	-0.14648	0.53296	-0.41382	-27.098	100.579	74.1877	-0.039063	-0.053711	-0.1416	-25.817	48.2495	85.0762	-0.013886	-0.12932	-0.15495	-72.384	-49.2054	1004.296	-1.6602	0.78223	-0.80957	-26.187	137.037	761.458	-0.64648	0.35498	-0.91797	-11.16	62.251	1271.398	-1.55	0.98144	-0.89492	39.43	-50.723	1517.024	-1.2257	0.31514	-1.528
1.37	-81.3604	35.024	86.667	-0.18408	0.54541	-0.4624	-67.6349	50.2066	49.834	-0.040527	-0.038574	-0.13818	-41.386	113.314	65.24	-0.018006	-0.11354	-0.15591	-68.449	-60.9789	992.182	-1.7241	0.96533	-0.81006	-70.062	170.3655	697.414	-0.61792	0.33325	-0.86596	-34.888	33.4	1257.594	-1.5132	0.95654	-0.88037	29.226	-66.749	1505.049	-1.3772	0.3792	-1.5843
1.372	-51.274	-4.4781	130.7931	-0.25391	0.53906	-0.54297	-48.436	52.6083	45.978	-0.036621	-0.029297	-0.12695	-52.7963	34.699	70.6189	-0.016602	-0.09375	-0.16016	-102.7699	-76.348	984.488	-1.7671	1.2524	-0.8208	-51.189	132.85	705.4235	-0.5918	0.31641	-0.81348	-13.388	81.29026	1266.6774	-1.4802	0.92725	-0.86689	90.74	-35.7939	1539.261	-1.481	0.4543	-1.6342
1.374	-63.277	47.894	222.624	-0.30664	0.53906	-0.58789	-45.646	79.2988	24.423	-0.041016	-0.032715	-0.12695	-26.875	57.2806	76.5964	-0.011989	-0.076725	-0.16027	-48.356	-94.488	1025.614	-1.7651	1.3853	-0.84912	-54.9683	192.693	690.061	-0.56396	0.29492	-0.75146	-41.9456	124.182	1235.684	-1.4515	0.90147	-0.85088	52.649	-23.5259	1536.082	-1.5522	0.51514	-1.6909
1.376	-101.1177	56.604	340.495	-0.43262	0.51855	-0.69043	-49.949	19.4874	32.4228	-0.038086	-0.029785	-0.11963	-35.954	80.946	48.7459	-0.004697	-0.060383	-0.16022	-51.175	-50.955	1045.9559	-1.6875	1.5566	-0.93555	-71.5416	188.9989	655.8016	-0.55176	0.28418	-0.72266	-69.0803	95.001	1230.424	-1.4194	0.87568	-0.83448	46.3433	-67.89	1569.993	-1.603	0.54385	-1.7468
1.378	-60.346	22.58238	489.41	-0.56861	0.51099	-0.76197	-44.037	50.098	46.6982	-0.036621	-0.032471	-0.11303	-34.688	22.5816	57.4452	-0.0023211	-0.043204	-0.15674	-76.561	-90.965	1056.1615	-1.5542	1.5889	-0.98193	-58.444	161.997	637.203	-0.5249	0.2583	-0.65381	-39.69	164.809	1164.638	-1.3961	0.84532	-0.82031	85.4801	-38.90178	1612.906	-1.637	0.55459	-1.8007
1.38	-51.032	73.265	615.08	-0.73633	0.50098	-0.83008	-43.338	52.4498	8.549	-0.038086	-0.032715	-0.10645	-23.196	82.701	50.331	0.0012871	-0.031231	-0.15254	-30.893	-129.01	1067.1474	-1.4043	1.582	-0.99316	-90.5663	190.484	565.523	-0.50488	0.24487	-0.60376	-66.3583	158.92	1104.52	-1.3687	0.81885	-0.80127	14.007	-50.676	1603.318	-1.6628	0.56513	-1.846
1.382	-48.344	54.0276	767.0385	-0.99561	0.51416	-0.90869	-34.603	27.1535	14.0851	-0.034668	-0.040039	-0.097656	-35.725	46.903	36.6111	0.0097656	-0.024902	-0.14941	-65.968	-144.1345	1070.4633	-1.25	1.4941	-0.94531	-90.3329	146.242	533.284	-0.48975	0.22559	-0.5542	-19.821	153.995	1099.941	-1.34	0.79395	-0.79238	23.7351	-62.562	1645.302	-1.7075	0.59951	-1.9065
1.384	-36.985	64.44	902.977	-1.2115	0.55371	-0.94776	-31.437	75.262	15.7507	-0.025391	-0.04541	-0.088867	-29.601	21.4478	61.0014	0.014834	-0.018262	-0.14317	-55.495	-173.0921	1136.959	-1.2188	1.4082	-0.91406	-65.309	172.522	522.9275	-0.46533	0.21582	-0.49023	-8.225	192.537	1052.223	-1.3104	0.76337	-0.76806	25.6665	-44.0882	1611.35	-1.7637	0.65625	-1.9746
1.386	-71.716	96.594	996.334	-1.4268	0.61035	-0.98633	-40.7751	27.906	11.1767	-0.018555	-0.052246	-0.079102	-50.157	64.985	39.849	0.02723	-0.018168	-0.13838	-60.7	-122.206	1179.069	-1.231	1.1987	-0.82764	-82.701	189.101	501.934	-0.44629	0.21191	-0.46289	-55.7667	127.5061	1038.6696	-1.2819	0.73642	-0.75517	-32.615	-60.1459	1595.221	-1.8177	0.72158	-2.0199
1.388	-63.788	36.2289	1065.0166	-1.6655	0.71436	-1.021	-37.19	25.5093	35.7251	-0.0087889	-0.062011	-0.073731	-46.018	-2.3654	34.1667	0.034278	-0.015042	-0.13096	-140.59	-127.18	1176.4242	-1.2854	1.0423	-0.79175	-68.071	128.7647	478.4718	-0.39844	0.20313	-0.4043	-23.776	142.0302	1009.5983	-1.2525	0.70752	-0.73467	23.58295	-18.449	1614.225	-1.8577	0.78681	-2.0589
1.39	-68.841	53.0989	1096.6847	-1.7534	0.77979	-1.0386	-31.632	59.588	5.497	-0.00097656	-0.068848	-0.066895	-27.889	27.0068	43.187	0.041012	-0.021388	-0.1172	-110.7489	-180.024	1155.985	-1.3516	0.91797	-0.75977	-59.746	158.22664	448.899	-0.36523	0.19506	-0.3584	-33.1673	152.3409	957.623	-1.2266	0.67578	-0.71875	21.1689	-1.061	1545.0915	-1.8683	0.8333	-2.0882
1.392	-96.674	19.069	1120.94	-1.8574	0.94531	-1.0605	-26.634	-4.6591	14.2162	0.012207	-0.080566	-0.057129	-38.248	54.1	18.9639	0.050293	-0.02832	-0.11084	-102.4461	-202.041	1115.126	-1.437	0.83057	-0.75342	-52.8892	144.753	402.337	-0.32031	0.18408	-0.31299	-34.531	120.36	930.2388	-1.2102	0.65313	-0.69844	1.717	-11.7041	1489.0556	-1.8519	0.86895	-2.0859
1.394	-38.909	-45.2205	1152.784	-1.8435	1.0813	-1.0749	-9.724	49.1286	33.5091	0.021484	-0.089844	-0.046387	-41.28	5.4344	19.7351	0.053811	-0.036526	-0.10341	-104.79011	-286.854	1166.891	-1.4683	0.81104	-0.76416	-38.409	129.416	412.9567	-0.26904	0.16455	-0.26123	-2.899	175.439	891.642	-1.1875	0.6291	-0.67852	22.3808	22.8161	1443.026	-1.8159	0.87646	-2.064
1.396	-62.247	-20.4483	1145.149	-1.7637	1.1973	-1.1025	-26.355	56.765	14.245	0.035156	-0.104	-0.045898	-29.561	51.912	13.608	0.059082	-0.047756	-0.092086	-72.967	-289.713	1235.189	-1.5059	0.81348	-0.83008	-53.393	192.091	404.3908	-0.24561	0.15137	-0.23584	-37.758	172.4271	847.076	-1.1617	0.60957	-0.65587	-41.2713	25.393	1409.438	-1.7745	0.83994	-2.0312
1.398	-68.5525	-70.1917	1145.133	-1.5449	1.252	-1.1309	-6.792	22.0209	24.3264	0.051758	-0.1106	-0.038574	-44.9104	20.6837	7.7723	0.059864	-0.059476	-0.079978	-97.4015	-297.154	1261.71	-1.5252	0.85572	-0.89673	-37.14	145.9685	383.553	-0.19531	0.12744	-0.18066	-32.097	167.27324	858.5244	-1.1305	0.59141	-0.63712	11.8396	38.532	1422.5743	-1.7335	0.77041	-1.9796
1.4	-29.743	-77.4581	1180.547	-1.396	1.2446	-1.1274	8.517	82.758	20.9478	0.064941	-0.11426	-0.03418	-40.33	-10.5291	40.9871	0.06211	-0.073145	-0.069921	-52.503	-347.098	1290.63875	-1.5503	0.9126	-0.97119	-22.31	152.805	382.319	-0.16894	0.10644	-0.14575	-3.162	200.19	829.779	-1.0933	0.57422	-0.61865	16.9155	73.709	1399.05309	-1.696	0.69073	-1.9288
1.402	-65.4439	-37.611	1185.5759	-1.1104	1.1709	-1.0879	-24.767	34.4217	20.1526	0.085449	-0.12451	-0.02832	-23.933	45.18465	32.1281	0.061523	-0.081543	-0.060059	-4.279	-322.402	1296.131	-1.5996	0.98047	-1.0625	-36.775	151.1376	343.23072	-0.13965	0.08252	-0.10547	-40.2069	152.436	810.9684	-1.05	0.55741	-0.60351	-30.6187	65.7284	1347.363	-1.6511	0.60293	-1.8831
1.404	-9.414	-87.845	1183.978	-0.98534	1.084	-1.0473	-10.552	35.0818	46.442	0.093262	-0.12939	-0.028809	-39.183	-6.443	30.1518	0.064453	-0.093456	-0.051856	-26.462	-318.327	1335.528	-1.6362	1.0083	-1.0972	-11.62	78.074	353.507	-0.10498	0.051758	-0.056152	-19.474	170.922	783.264	-1.0057	0.53973	-0.58583	-1.277	74.944	1317.648	-1.5894	0.5249	-1.8511
1.406	15.229	-76.237	1168.3613	-0.93164	0.96484	-1.001	-7.296	56.6937	20.111	0.11328	-0.14307	-0.027344	-36.875	24.93682	37.802	0.068652	-0.10332	-0.040626	5.071	-288.713	1418.4383	-1.7188	1.0566	-1.1484	-7.90499999999999	136.4542	325.7036	-0.087402	0.044434	-0.035645	-3.465	194.472	723.9877	-0.95845	0.52294	-0.56902	-58.6732	103.303	1267.531	-1.5156	0.46524	-1.8215
1.408	-35.864	-76.513	1167.0879	-0.98389	0.7915	-0.96631	-36.703	1.783	16.417	0.12744	-0.15039	-0.02417	-57.212	54.177	1.324	0.079589	-0.11152	-0.03086	-20.929	-217.5356	1447.4734	-1.7757	1.0808	-1.1873	-3.392	125.3323	292.0828	-0.060547	0.017578	-0.0014648	-15.636	164.491	702.0642	-0.90778	0.499	-0.55485	-67.2133	89.914	1268.5152	-1.4422	0.4291	-1.7977
1.41	-18.101	-89.221	1227.312	-1.0347	0.7124	-0.94873	-25.024	42.639	35.4075	0.13721	-0.15479	-0.027344	-34.437	-2.4058	21.8836	0.090136	-0.121	-0.025196	-84.493	-224.547	1502.412	-1.8262	1.1016	-1.2148	-0.0910000000000011	101.0596	279.3549	-0.038819	0.0063476	0.027099	21.96	193.205	645.122	-0.86084	0.47021	-0.53271	-32.175	105.345	1298.815	-1.3804	0.41661	-1.7867
1.412	-42.643	-44.67	1245.9845	-1.1675	0.58838	-0.92627	-29.269	40.4753	30.8317	0.15186	-0.16455	-0.021484	-36.743	56.306	9.1075	0.10449	-0.12598	-0.015137	-42.462	-184.075	1548.422	-1.8672	1.1582	-1.2441	-11.227	133.693	229.212	-0.013672	-0.0048828	0.053223	-29.113	156.5449	614.1399	-0.81462	0.43988	-0.51166	-71.0881	87.502	1246.8289	-1.3232	0.41612	-1.78
1.414	-69.3373	-94.961	1269.04064	-1.2747	0.54174	-0.92652	-43.806	7.9273	49.596	0.15771	-0.16504	-0.024414	-57.3441	29.1787	10.4673	0.11562	-0.12696	-0.01875	-62.8683	-167.088	1532.9674	-1.873	1.1797	-1.2568	-23.862	69.579	230.11978	0.020996	-0.014648	0.090332	-5.45	140.837	585.768	-0.77123	0.41669	-0.48909	-13.721	37.013	1213.9125	-1.2769	0.42676	-1.7651
1.416	-49.772	-139.437	1276.911	-1.3711	0.53027	-0.94922	-15.572	55.054	38.4759	0.17578	-0.16943	-0.017578	-31.322	-3.2207	37.2798	0.13574	-0.13047	-0.010645	-57.622	-184.788	1525.539	-1.9106	1.2368	-1.2837	-16.986	91.0736	227.7177	0.044678	-0.028808	0.097168	12.352	168.7106	543.8608	-0.73101	0.38937	-0.47159	-5.705	63.1238	1191.334	-1.2305	0.44472	-1.743
1.418	-67.7196	-181.482	1259.514	-1.4785	0.57031	-1.0156	-45.5571	19.8893	17.748	0.18652	-0.17139	-0.021728	-35.707	42.83391	20.154	0.14981	-0.1332	-0.0036132	-29.75	-144.399	1519.754	-1.9373	1.2874	-1.3064	-28.2	114.2025	200.834	0.073242	-0.028809	0.11865	-11.246	150.0903	530.288	-0.68471	0.36764	-0.44712	-39.318	51.385	1178.7189	-1.1875	0.46201	-1.7231
1.42	-46.1081	-272.734	1299.005	-1.5225	0.6084	-1.0625	-50.475	18.1035	54.206	0.18945	-0.17334	-0.022461	-38.551	4.68	14.0747	0.16279	-0.13262	-0.0014648	-99.592	-165.506	1526.719	-1.9585	1.3403	-1.3335	-20.991	69.535	203.8588	0.10693	-0.038086	0.13574	1.534	164.108	518.0436	-0.64111	0.34619	-0.42334	19.195	71.957	1199.389	-1.1445	0.47803	-1.6965
1.422	-11.256	-252.794	1336.09	-1.6069	0.70947	-1.1421	-24.492	38.8638	35.13727	0.19678	-0.17578	-0.023926	-21.336	35.237057	13.38028	0.1709	-0.13623	-0.00097656	-65.428	-170.702	1579.2528	-1.9883	1.4121	-1.3574	-9.79300000000001	127.921	193.9308	0.12158	-0.036621	0.13916	-22.039	172.522	471.922	-0.59279	0.32675	-0.399	-2.14100000000001	113.95	1138.306	-1.1079	0.49053	-1.6653
1.424	-49.351	-261.322	1355.7439	-1.6641	0.77978	-1.1968	-48.74	-15.003	29.514	0.19824	-0.17627	-0.025391	-40.023	71.742	-9.9887	0.17842	-0.14268	0.0045898	-39.56	-135.041	1585.472	-2.0024	1.4419	-1.3589	-51.714	100.3508	164.6743	0.14209	-0.037598	0.14844	-30.218	147.629	465.859	-0.54382	0.31155	-0.3778	-4.704	87.576	1104.687	-1.084	0.50293	-1.6328
1.426	14.188	-279.039	1368.348	-1.7241	0.83838	-1.2476	-28.778	15.277	31.273	0.19385	-0.1748	-0.030762	-29.944	11.7903	19.5339	0.18164	-0.14912	0.00625	-61.952	-182.34	1619.2503	-2.0273	1.4902	-1.3867	-41.784	77.8025	179.659	0.16089	-0.035645	0.15381	-15.21	166.818	450.637	-0.4957	0.29623	-0.35255	57.7161	110.8638	1085.3404	-1.0688	0.5125	-1.5914
1.428	48.0737	-254.7	1367.399	-1.8022	0.90088	-1.2983	-46.59223	18.0996	14.788	0.19092	-0.16944	-0.032959	-15.918	55.2135	30.8034	0.18203	-0.15576	0.0039063	-7.955	-166.356	1672.575	-2.0347	1.5088	-1.3877	-47.809	126.139	148.9315	0.16699	-0.030762	0.1626	-56.9481	144.458	421.534	-0.44727	0.28206	-0.32777	-7.015	122.573	1047.8912	-1.0663	0.51923	-1.5522
1.43	33.45461	-285.2	1434.123	-1.8374	0.92236	-1.3237	-43.648	-11.6502	39.3803	0.18701	-0.16455	-0.027344	-29.753	36.8477	17.5986	0.18486	-0.16133	0.005957	-47.53	-147.505	1670.1852	-2.0371	1.5176	-1.3887	-50.35	56.6417	134.5367	0.17725	-0.02002	0.16699	-46.8373	119.1887	407.346	-0.39941	0.27002	-0.31006	-16.283	131.034	1022.177	-1.0663	0.51846	-1.5148
1.432	59.491	-268.701	1514.4401	-1.8901	0.96143	-1.353	-25.091	48.934	28.9811	0.17041	-0.1543	-0.029785	-36.177	3.793	32.7359	0.18311	-0.1665	0.0048828	-114.6063	-143.553	1689.357	-2.0386	1.4985	-1.3677	-67.9908	66.4895	125.288	0.18213	-0.019531	0.16992	-26.358	116.2325	350.6938	-0.35168	0.25284	-0.29125	-23.043	183.322	985.9601	-1.0654	0.51563	-1.4746
1.434	-20.946	-215.881	1552.4611	-1.9236	0.97974	-1.3718	-41.162	16.0004	-2.167	0.17236	-0.14551	-0.038086	-30.39	64.489	28.8444	0.18418	-0.16904	0.00078126	-75.307	-75.2607	1690.493	-2.0366	1.481	-1.3589	-66.9811	65.402	89.946	0.18457	-0.0058594	0.17334	-68.575	96.305	304.8734	-0.30681	0.24112	-0.27173	-69.8118	175.012	947.2579	-1.0566	0.50879	-1.4297
1.436	-5.777	-197.801	1585.001	-1.958	0.98828	-1.3867	-37.411	21.5845	10.9072	0.16699	-0.12988	-0.04541	-40.153	23.2003	3.372	0.18125	-0.16612	-0.0059571	-122.6887	-99.4194	1671.731	-2.021	1.4263	-1.3198	-70.387	14.938	87.881	0.18945	-0.0019531	0.16992	-25.514	99.687	301.2289	-0.25786	0.22417	-0.25227	-24.455	155.414	918.9248	-1.0433	0.50547	-1.3873
1.438	-17.047	-121.851	1582.878	-2.0234	1.001	-1.4043	-33.59	42.267	3.796	0.16797	-0.11962	-0.049073	-33.025	38.8323	18.8978	0.17774	-0.16612	-0.011035	-92.3485	-114.0919	1690.514	-2.0039	1.3857	-1.2959	-51.094	73.249	74.867	0.19434	0.0063477	0.17285	-44.793	114.9198	259.971	-0.21062	0.20658	-0.23428	-53.72	167.154	877.0132	-1.0143	0.50195	-1.3426
1.44	-70.3066	-93.578	1571.187	-2.0566	1.0078	-1.4072	-52.1977	-5.5481	24.29284	0.17432	-0.10254	-0.05957	-31.846	70.975	-1.765	0.17862	-0.15264	-0.021973	-81.177	-93.967	1679.018	-1.9839	1.3481	-1.2749	-50.4201	48.641	74.3814	0.19678	0.013184	0.1626	-59.608	84.983	241.7197	-0.16797	0.18994	-0.21436	-52.694	141.9301	852.4841	-0.983	0.49883	-1.3066
1.442	-16.922	-80.613	1579.439	-2.1479	1.022	-1.4116	-12.766	31.0002	30.7323	0.17725	-0.083984	-0.067383	-35.764	3.2841	20.19573	0.17432	-0.14404	-0.026855	-111.1864	-109.20529	1643.6345	-1.9429	1.3091	-1.2515	-72.7785	31.8159	78.2553	0.19824	0.014648	0.1665	-10.785	93.2431	231.8334	-0.12464	0.16577	-0.20539	-19.149	157.548	850.9302	-0.94541	0.49326	-1.2727
1.444	-22.105	-46.272	1582.221	-2.2173	1.0396	-1.4087	-18.787	25.0731	0.117999999999999	0.18262	-0.077148	-0.075684	-24.223	58.303	30.7481	0.16914	-0.1291	-0.03623	-72.02	-41.8717	1605.939	-1.907	1.2981	-1.24	-59.7313	94.016	56.18	0.20215	0.022949	0.16943	-69.8325	86.8511	205.84	-0.079432	0.13435	-0.19657	-76.7585	168.066	788.358	-0.89844	0.48145	-1.2324
1.446	-45.021	-79.83	1602.639	-2.2808	1.0571	-1.4038	-23.876	-5.5934	14.46326	0.18848	-0.057617	-0.09375	-41.231	46.5645	30.146	0.16641	-0.11729	-0.047559	-104.09411	-10.501708	1548.691	-1.8706	1.2876	-1.2319	-51.724	43.272	52.9419	0.20191	0.018555	0.1648	-42.131	94.407	218.4876	-0.042458	0.11177	-0.18598	-51.548	126.686	756.2973	-0.85527	0.46875	-1.1879
1.448	-5.308	-88.8218	1644.5459	-2.3374	1.0854	-1.3999	-0.0150000000000006	45.629	15.8106	0.19434	-0.042724	-0.10718	-45.905	23.03989	46.6099	0.17031	-0.098145	-0.053809	-101.604	-25.3335	1542.656	-1.8223	1.293	-1.2188	-26.542	73.132	63.6673	0.20459	0.017578	0.1582	-34.713	124.797	179.694	-0.01306	0.091204	-0.17449	-64.208	151.2384	712.681	-0.81201	0.45313	-1.145
1.45	-39.8298	-86.436	1637.146	-2.3594	1.0879	-1.3984	-26.158	20.2356	-14.7166	0.20068	-0.030762	-0.11963	-19.321	84.333	14.993	0.17246	-0.084473	-0.066797	-54.396	2.0796	1549.521	-1.7964	1.2974	-1.2124	-33.938	83.1	46.9431	0.20068	0.015625	0.15332	-92.3785	124.525	150.1866	0.0043945	0.060059	-0.16553	-93.7959	131.917	670.337	-0.76592	0.43516	-1.095
1.452	-36.172	-112.209	1656.8002	-2.3511	1.104	-1.3921	-12.193	23.4988	8.3875	0.19727	-0.017578	-0.13525	-41.076	33.9707	14.5485	0.17822	-0.067871	-0.082031	-70.825	-25.09	1534.203	-1.7515	1.2974	-1.1978	-37.899	23.1821	45.49025	0.19141	0.0097656	0.14648	-44.026	122.416	145.02226	0.019231	0.033119	-0.15949	-53.996	125.221	678.8031	-0.72754	0.41426	-1.048
1.454	-4.947	-78.334	1673.8596	-2.3201	1.1008	-1.3855	-3.711	49.535	-1.1893	0.1958	-0.0083008	-0.14258	-36.484	44.36	39.2592	0.18584	-0.058106	-0.096096	-49.003	-22.296	1554.1015	-1.7133	1.2886	-1.189	-26.144	74.309	38.667	0.17334	0.0053711	0.13525	-45.161	121.951	115.619	0.029119	0.01092	-0.15399	-106.894	170.547	657.0631	-0.68506	0.39307	-0.99756
1.456	-51.944	-68.763	1664.4219	-2.2695	1.1016	-1.377	-50.6202	-4.484	7.29037	0.18457	0.0097656	-0.15723	-41.342	62.615	20.501	0.19151	-0.051074	-0.10684	-61.69	19.44496	1529.26278	-1.6699	1.2773	-1.1777	-25.977	44.6829	8.422	0.15454	0.0034179	0.12696	-25.817	88.179	122.3881	0.03892	-0.0086585	-0.14716	-111.253	144.8781	631.499	-0.64932	0.37539	-0.94385
1.458	-45.248	-76.2587	1688.733	-2.1851	1.0942	-1.3687	-4.099	19.486	25.1902	0.17505	0.022949	-0.17676	-47.355	6.2731	38.6769	0.19385	-0.043262	-0.11934	-96.9997	19.1699	1497.3718	-1.6245	1.2524	-1.1558	-14.656	17.7918	31.562	0.14063	0.0063477	0.11719	-11.288	88.4956	112.197	0.04248	-0.02571	-0.15239	-49.307	153.388	594.80624	-0.61631	0.35557	-0.89268
1.46	-69.9848	-50.184	1674.317	-2.1362	1.0962	-1.3628	-4.747	35.2437	-7.03	0.16064	0.038086	-0.18408	-47.811	53.299	37.3691	0.19317	-0.039453	-0.13106	-61.857	42.2959	1472.58786	-1.5991	1.2388	-1.144	-29.992	65.864	13.2254	0.12012	0.0097656	0.104	-37.049	85.3356	77.096	0.041504	-0.033691	-0.1499	-106.924	175.753	534.406	-0.58233	0.34424	-0.84228
1.462	-116.261	-74.7336	1659.372	-2.0425	1.0972	-1.3472	-42.672	14.4335	14.591	0.14209	0.04541	-0.20654	-49.821	31.0386	20.134	0.19238	-0.037598	-0.14941	-69.113	35.4227	1438.808	-1.5605	1.207	-1.1172	-6.764	13.4922	7.7913	0.10938	0.022461	0.095215	-36.143	68.487	85.519	0.041617	-0.038937	-0.1543	-71.262	146.1782	531.9942	-0.54316	0.32793	-0.79277
1.464	-69.419	-72.8716	1668.616	-1.9739	1.1048	-1.3425	-16.871	79.709	23.80695	0.12695	0.046387	-0.22021	-31.782	-3.5051	49.108	0.18428	-0.0375	-0.16631	-63.9	1.31979	1443.4627	-1.5303	1.1812	-1.0976	-2.338	37.908	15.7448	0.095215	0.040039	0.077148	-12.471	91.047	72.701	0.04322	-0.037281	-0.1561	-34.387	174.555	522.379	-0.50879	0.30566	-0.74512
1.466	-93.088	-40.858	1626.2953	-1.9102	1.1123	-1.334	-32.346	55.668	8.91046	0.091797	0.052734	-0.25244	-30.14	61.078	28.8049	0.175	-0.030176	-0.18359	-7.947	9.23067	1449.3298	-1.5059	1.1484	-1.0723	-16.048	45.115	4.492	0.09375	0.058594	0.072998	-43.613	90.705	55.8872	0.048602	-0.031987	-0.15771	-70.509	157.423	464.374	-0.47646	0.28721	-0.69834
1.468	-79.393	-51.8767	1595.532	-1.8335	1.1255	-1.3101	-23.373	28.335	49.304	0.05127	0.052002	-0.26709	-41.067	20.9405	17.20512	0.16407	-0.02041	-0.20156	-64.3731	-15.4314	1403.84485	-1.4722	1.1147	-1.0464	-14.496	-11.73858	26.2207	0.089844	0.074219	0.064453	-4.646	75.66	74.0798	0.050437	-0.02533	-0.15782	-21.842	140.184	437.666	-0.44522	0.26435	-0.64756
1.47	-47.066	-10.554	1560.6182	-1.7891	1.127	-1.2969	-33.93	42.873	32.722	-0.0029297	0.057129	-0.28711	-25.657	30.927	53.048	0.14883	-0.010059	-0.22481	-34.703	-31.673	1396.609	-1.4512	1.0938	-1.0332	-7.307	48.0796	26.8495	0.10303	0.095703	0.056152	-30.092	87.773	63.814	0.057129	-0.011719	-0.1626	-35.003	173.545	390.355	-0.41826	0.24522	-0.60029
1.472	-87.3048	1.7079	1506.142	-1.7124	1.1313	-1.2651	-54.3515	-16.9496	71.0647	-0.093262	0.057129	-0.31445	-37.301	50.138	42.1555	0.13818	0.0039063	-0.25244	-31.129	22.795	1354.2755	-1.4116	1.0532	-1.0054	-13.445	37.187	15.44465	0.11035	0.104	0.058105	-53.6277	63.6006	84.6127	0.058438	0.0015022	-0.16115	-23.44	142.0155	383.5881	-0.4	0.22392	-0.55039
1.474	-59.11	8.2291	1508.1391	-1.6601	1.1196	-1.2353	-18.209	-7.6892	111.2561	-0.13965	0.057617	-0.3252	-38.355	-26.62	72.6	0.12168	0.026074	-0.26953	-72.231	24.854	1312.341	-1.3845	1.0188	-0.98217	-27.886	23.4584	26.6312	0.12549	0.12305	0.057617	-15.133	62.4269	82.9406	0.059199	0.016479	-0.16077	-20.703	161.487	380.4611	-0.37939	0.20459	-0.50537
1.476	-52.695	45.067	1475.518	-1.6079	1.1079	-1.1987	-16.528	-4.9184	107.766	-0.24268	0.049805	-0.36377	-21.692	1.86601	73.541	0.10664	0.046778	-0.29073	-6.711	58.382	1307.3572	-1.3594	0.98633	-0.96387	-25.526	83.053	21.266674	0.13501	0.12744	0.061279	-63.2495	69.01004	50.262	0.063096	0.038364	-0.16545	-48.829	188.77	342.052	-0.354	0.18701	-0.45537
1.478	-40.172	37.9704	1441.927	-1.5522	1.0815	-1.1558	-47.994	-34.7425	138.169	-0.33277	0.040527	-0.40991	-43.537	-6.5034	73.691	0.085937	0.063183	-0.32002	-40.087	110.706	1263.222	-1.3379	0.94336	-0.93164	-52.749	30.8347	11.9137	0.146	0.12939	0.067383	-40.428	49.308	59.7522	0.070516	0.051776	-0.16679	-7.946	127.345	334.806	-0.32891	0.17226	-0.40947
1.48	-8.61199999999999	48.6831	1433.367	-1.5249	1.061	-1.1313	-11.08	5.5263	179.295	-0.42822	0.033691	-0.45947	-20.721	-20.1934	118.6953	0.062793	0.068945	-0.34112	-61.591	112.826	1265.78	-1.3262	0.92383	-0.91602	-36.511	44.9869	30.547	0.15967	0.12305	0.070313	-16.886	63.748	30.8165	0.08252	0.06543	-0.16455	-7.298	154.174	337.6499	-0.30039	0.15703	-0.36572
1.482	-67.972	65.88	1409.517	-1.4746	1.0234	-1.0859	-14.3591	-20.2322	230.237	-0.59277	0.011719	-0.53223	2.394	45.05	146.931	0.022949	0.077637	-0.3667	-41.8573	143.858	1267.001	-1.2974	0.88721	-0.88232	-22.583	60.8965	4.024	0.16748	0.11963	0.07666	-62.096	60.691	23.12452	0.090421	0.079377	-0.16152	-39.394	140.98	343.9682	-0.27178	0.15039	-0.32529
1.484	-54.091	43.612	1418.74212	-1.4392	0.99387	-1.0583	-5.491	-0.334300000000001	366.7920415	-0.69922	0.0029297	-0.57959	-19.8159	10.6488	195.905	-0.032519	0.083203	-0.39082	-99.559	137.498	1229.0158	-1.2749	0.86328	-0.86035	-54.1267	6.999	20.1817	0.1748	0.104	0.086426	-36.343	55.158	31.3667	0.097942	0.087781	-0.15918	6.013	107.1058	338.12	-0.23779	0.13623	-0.27979
1.486	-26.549	44.9347	1427.159	-1.396	0.96338	-1.0327	-7.349	64.476	477.464	-0.95117	-0.023926	-0.6543	14.9062	34.851	299.989	-0.10274	0.077051	-0.41748	-60.044	122.6069	1195.953	-1.2441	0.84375	-0.83398	-53.275	53.7767	29.2906	0.17529	0.090332	0.092774	-63.8315	71.163	9.372	0.10458	0.096771	-0.15801	-0.00900000000000034	148.896	287.30289	-0.21416	0.12392	-0.24707
1.488	-61.4724	44.034	1391.7172	-1.3452	0.92041	-1.0015	-27.0907	34.492	610.428	-1.1792	-0.035889	-0.71045	12.537	82.861	424.798	-0.18711	0.066114	-0.44639	-43.244	154.688	1134.72	-1.1992	0.81152	-0.80469	-67.6498	38.00851	1.18	0.16992	0.082031	0.09668	-70.8255	45.98496	34.5316	0.11269	0.10468	-0.15167	-28.341	94.0214	266.014	-0.18418	0.11113	-0.21836
1.49	-17.304	15.9459	1376.027	-1.3169	0.90479	-0.98682	8.363	48.9238	741.778	-1.4263	-0.025879	-0.75928	-10.837	44.433	570.263	-0.28613	0.048047	-0.49199	-75.943	146.5866	1078.606	-1.1753	0.79932	-0.78662	-64.731	19.4925	30.6908	0.16895	0.080566	0.096191	-9.75899999999999	28.9825	48.7952	0.11865	0.10352	-0.14746	9.831	84.2505	257.77	-0.16113	0.093946	-0.18281
1.492	-21.008	41.466	1320.9568	-1.2793	0.86523	-0.96387	3.933	62.3197	837.963	-1.7695	0.034668	-0.83594	16.067	77.1976	692.563	-0.39697	0.025879	-0.52979	-41.183	152.293	1073.7238	-1.1289	0.75781	-0.75586	-45.966	81.456	26.4176	0.17236	0.082031	0.098145	-78.384	35.4598	26.71	0.1335	0.10478	-0.14414	-52.006	108.6175	224.129	-0.13613	0.074902	-0.14941
1.494	-60.4058	42.259	1286.351	-1.2478	0.84448	-0.95093	22.0824	31.48948	984.1464	-1.937	0.084961	-0.87842	18.1318	52.064	770.001	-0.54238	0.013574	-0.57197	-70.3134	159.41	1037.49	-1.0944	0.73071	-0.7312	-64.1529	19.5858	34.6899	0.17041	0.083008	0.092773	-53.952	18.114	41.0048	0.14522	0.10351	-0.13652	-24.642	49.52	216.9864	-0.11621	0.060059	-0.11914
1.496	-13.647	39.328	1292.0586	-1.2227	0.8291	-0.93945	70.027	78.741	1093.5525	-2.228	0.24609	-0.96631	15.3214	14.781	898.755338	-0.7207	-0.006836	-0.6166	-65.2386	110.86	1008.0553	-1.0601	0.70752	-0.70361	-58.952	24.5615	50.539	0.17798	0.087647	0.084961	-22.726	42.014	29.6664	0.15733	0.10117	-0.13144	-33.001	94.4187	201.1233	-0.095409	0.049023	-0.090918
1.498	-39.02	58.281	1266.97212	-1.1851	0.80127	-0.92139	24.062	52.5404	1137.299	-2.3691	0.41967	-1.0263	31.587	69.201	983.139	-0.93477	-0.019727	-0.65801	-20.462	108.856	986.1751	-1.0112	0.6665	-0.66748	-55.7796	44.7549	23.3558	0.18164	0.097168	0.072754	-84.9797	43.6428	32.7629	0.16797	0.096289	-0.12276	-75.1392	88.6012	182.7425	-0.077149	0.042676	-0.06709
1.5	-40.952	28.22	1256.487	-1.166	0.78906	-0.91309	17.9655	-7.106	1176.632	-2.4551	0.66504	-1.0742	24.909	15.417	1030.7511	-1.1686	-0.021973	-0.70537	-54.0688	110.857	933.761	-0.98486	0.65381	-0.65186	-44.749	-7.304	29.392836	0.19287	0.10889	0.058105	-30.47	32.432	49.212	0.18408	0.087891	-0.12305	-35.318	57.3966	181.59	-0.05918	0.03877	-0.045215
1.502	3.69600000000001	66.397	1231.522	-1.1362	0.77197	-0.89795	49.911	-34.932	1157.804	-2.5288	1.0591	-1.1694	20.025	4.676	1078.357	-1.4248	-0.0068359	-0.74414	-31.759	105.87	913.9984	-0.93311	0.61426	-0.61572	-32.129	45.2024	46.2194	0.1958	0.11816	0.046875	-35.899	35.458	19.338	0.19463	0.076465	-0.11084	-79.2633	125.98	140.724	-0.03418	0.032715	-0.022363
1.504	-34.948	114.3878	1183.095	-1.1113	0.75293	-0.88379	25.53492	-123.147	1154.834	-2.5229	1.2134	-1.2446	1.158	23.748	1075.338	-1.6895	0.044141	-0.79775	-46.258	167.993	874.539	-0.88843	0.58715	-0.5957	-42.444	28.2976	29.0367	0.19336	0.12598	0.032715	-48.782	11.919	19.6137	0.20293	0.068652	-0.10176	-75.3493	96.254879	147.732	-0.0087891	0.02832	-0.0039063
1.506	-24.653	125.5752	1156.3343	-1.0894	0.73779	-0.86768	29.8	-129.798	1197.898	-2.3184	1.3867	-1.375	1.447	-45.31	1099.974	-1.9421	0.13525	-0.86865	-91.4285	178.163	840.3369	-0.84717	0.56104	-0.56982	-29.846	-7.3689	32.62698	0.18921	0.13404	0.020996	-14.917	12.1736	34.5513	0.21426	0.062403	-0.099805	-59.67	103.436	154.0745	0.014941	0.025097	0.016211
1.508	-29.346	185.797	1112.1143	-1.0581	0.71729	-0.85303	15.011	-119.368	1174.97574	-1.9387	1.4016	-1.3933	-8.492	-27.462	1110.887	-2.1436	0.26025	-0.95459	-6.894	163.581	836.36	-0.79053	0.52002	-0.54639	-2.491	54.457	13.23	0.18164	0.14502	0.00097656	-54.532	34.9805	24.355	0.2247	0.048145	-0.092481	-82.55115	127.327	122.32771	0.041406	0.027636	0.025879
1.51	-59.45217	180.015	1075.40549	-1.043	0.71045	-0.83984	-5.055	-157.649	1190.0791	-1.5059	1.3555	-1.3633	-17.626	-41.033	1098.398	-2.2628	0.42237	-1.0382	-30.56	184.771	774.2154	-0.75781	0.49805	-0.52979	-34.7877	17.562	19.011	0.17334	0.16064	-0.027832	-19.444	9.034	41.8822	0.23389	0.037598	-0.08252	-59.085	56.3027	115.021	0.07539	0.026856	0.038379
1.512	-26.14	154.993	1063.1517	-1.0137	0.69141	-0.82031	33.3431	-91.248	1208.466	-1.0679	1.1968	-1.3237	0.917000000000002	-64.069	1125.79707	-2.2891	0.61914	-1.1074	-30.568	152.1473	739.617	-0.69629	0.46191	-0.49902	-16.591	28.5825623	47.301	0.16846	0.17041	-0.043945	-4.726	33.3643	24.13157	0.23945	0.022363	-0.075488	-40.135	91.8666	77.465	0.10332	0.031055	0.049707
1.514	-43.9476	168.363	1025.233	-0.98682	0.67969	-0.80615	10.95	-95.737	1191.341	-0.92773	1.0879	-1.3105	14.139	-0.852000000000004	1124.009	-2.2475	0.88926	-1.1602	15.927	177.138	710.5086	-0.66137	0.43701	-0.47949	-11.78	57.586	20.284	0.15479	0.19824	-0.074707	-63.3673	28.3102	14.8835	0.24023	0.006738	-0.067773	-72.7612	80.13	57.197	0.13232	0.031738	0.057129
1.516	-35.2785	130.1884	989.058	-0.96045	0.6626	-0.78467	15.591	-124.92	1232.4254	-0.78076	0.854	-1.2886	-4.451	-16.012	1124.1891	-2.178	1.1408	-1.2382	-27.048	205.369	665.469	-0.61816	0.4082	-0.45996	-25.976	-7.01758	16.7904	0.13672	0.219	-0.10913	1.204	14.3713	35.992	0.23711	-0.0022462	-0.063868	-53.176	35.559	82.7147	0.16133	0.035938	0.064258
1.518	2.399	143.811	969.2288	-0.92188	0.63867	-0.75977	13.489	-76.241	1244.7288	-0.70801	0.66211	-1.2813	0.594000000000001	-21.72	1149.7668	-2.0233	1.2744	-1.3429	-3.037	156.97	641.3597	-0.56836	0.38281	-0.42822	0.677	43.25	26.094	0.12354	0.24414	-0.14063	-17.485	46.288	18.8668	0.23271	-0.011719	-0.057032	-62.401	89.556	56.595	0.18496	0.035937	0.068067
1.52	-46.7239	164.3173	909.614	-0.90186	0.63135	-0.74365	-27.961	-89.258	1263.13	-0.67871	0.57813	-1.2832	-19.832	10.254	1154.3601	-1.6995	1.2665	-1.3972	9.846	165.8724	581.4038	-0.53711	0.36816	-0.4165	-4.465	28.1122	10.752	0.087891	0.2749	-0.18408	-41.186	31.2491	34.168	0.229	-0.021973	-0.053223	-56.684	27.688	56.7578	0.20488	0.0375	0.072754
1.522	-19.196	119.648	872.4278	-0.85645	0.60254	-0.71191	-30.05	-34.59	1316.94	-0.646	0.44971	-1.2749	-45.151	-25.485	1201.138	-1.2651	1.1489	-1.3784	-34.602	140.956	531.3861	-0.47559	0.3418	-0.39648	-21.923	-2.3063	38.446	0.071777	0.29395	-0.21484	-13.234	23.2886	25.5733	0.22216	-0.025488	-0.044824	-17.763	36.8203	48.1328	0.21845	0.037793	0.072168
1.524	-20.258	148.9323	823.924	-0.82446	0.58447	-0.69238	-37.2591	9.8	1277.755	-0.64258	0.39453	-1.2955	-34.407	18.878	1244.99885	-0.89706	0.96387	-1.3236	13.678	132.5432	532.5464	-0.43261	0.31982	-0.37451	1.99299999999999	47.36	36.055	0.027832	0.32959	-0.26025	-39.321	38.0221	8.497	0.22002	-0.026563	-0.03877	-49.6601	78.598	52.6782	0.2251	0.037109	0.071777
1.526	-22.657	126.821	799.046	-0.79297	0.56348	-0.66992	-43.2267	-82.606	1255.144	-0.64307	0.37842	-1.3296	-50.5093	5.765	1224.759	-0.67773	0.76602	-1.2824	-21.139	199.212	499.202	-0.3877	0.30078	-0.35547	-38.632	-15.396	36.095	-0.018067	0.35131	-0.29443	-13.481	4.197	36.8371	0.21807	-0.026172	-0.036816	-14.305	19.7695	74.851	0.2292	0.044922	0.076367
1.528	15.074	113.184	826.7199	-0.74463	0.52979	-0.63818	-38.237	-145.442	1248.125	-0.65283	0.40674	-1.3726	-74.8878	-90.246	1246.881	-0.59414	0.58008	-1.2645	-38.238	178.531	491.971	-0.33008	0.26807	-0.32764	-22.902	-13.754	66.5982	-0.066895	0.37061	-0.32617	-9.246	18.2981	18.861	0.21631	-0.021094	-0.035938	-20.111	73.799	61.784	0.22548	0.048633	0.072949
1.53	-19.771	164.501	779.5235	-0.70678	0.50488	-0.61108	-59.0413	-223.711	1225.894	-0.66992	0.43555	-1.3789	-70.8613	-125.5033	1240.525	-0.56865	0.43349	-1.2511	4.972	169.848	477.3786	-0.29834	0.25635	-0.31396	-8.609	7.429	71.337	-0.13721	0.38867	-0.37256	-60.969	25.069	4.9927	0.21582	-0.012207	-0.03418	-32.844	62.79382	33.6206	0.22119	0.052148	0.076465
1.532	-3.531	140.49647	738.5514	-0.66748	0.47803	-0.5874	-48.5202	-280.027	1277.048	-0.76172	0.49805	-1.4229	-72.02139	-200.097	1226.028	-0.56348	0.31738	-1.2285	-51.3274	175.271	433.29803	-0.23926	0.22559	-0.29004	-44.087	-37.2521	95.1444	-0.1748	0.39111	-0.39941	-9.187	17.7319	31.514	0.21963	-0.0055664	-0.034375	4.525	10.334	45.6823	0.21816	0.05957	0.072168
1.534	21.374	174.575	716.185	-0.61865	0.43604	-0.55811	-19.771	-232.769	1300.332	-0.87475	0.54566	-1.4597	-45.986	-215.483	1288.066	-0.5792	0.24023	-1.214	-32.481	109.879	441.527	-0.20264	0.20459	-0.27124	-58.008	21.1029	160.738	-0.25635	0.40479	-0.45947	-60.371	59.501	10.8963	0.21924	-0.00058594	-0.028515	-21.247	65.7328	19.683	0.21436	0.069824	0.072266
1.536	-36.5245	192.263	642.512	-0.59033	0.4126	-0.5415	-18.3285	-263.519	1280.4317	-1.0098	0.58594	-1.4863	-31.533	-152.026	1290.1627	-0.60342	0.19228	-1.2257	-40.038	146.4306	406.8014	-0.16064	0.18066	-0.2666	-72.293	12.72407	232.327	-0.34107	0.41797	-0.52637	-50.507	36.4901	17.9795	0.22236	0.0017578	-0.03125	-1.622	25.122	22.2195	0.2081	0.082031	0.069922
1.538	6.906	141.1908	631.4438	-0.54688	0.36523	-0.51221	16.764	-272.584	1293.8802	-1.2046	0.6626	-1.521	-24.773	-193.296	1295.741	-0.63662	0.17666	-1.2527	-51.41	136.762	360.4603	-0.11279	0.14551	-0.2417	-92.689	0.231999999999999	345.908	-0.4375	0.41699	-0.5957	-14.016	11.14422	25.9312	0.22226	0.0017578	-0.033008	8.645	37.1719	23.5761	0.20107	0.089258	0.074414
1.54	18.845	192.937	594.9207	-0.50561	0.33496	-0.4917	47.226	-248.089	1289.175	-1.2866	0.69873	-1.5366	-6.187	-182.427	1326.223	-0.67383	0.18975	-1.282	-29.545	117.3983	335.181	-0.089844	0.13281	-0.23096	-66.455	62.0446	466.086	-0.60303	0.42627	-0.67236	-66.4235	34.2674	3.736	0.22168	0.0048828	-0.035645	-43.747	84.622	-7.384	0.20068	0.096289	0.072461
1.542	-6.092	169.9632	560.50689	-0.46533	0.30127	-0.46729	21.7819	-273.41	1326.764	-1.4277	0.7793	-1.5703	-0.433	-173.024	1344.552	-0.7207	0.2207	-1.3047	-68.479	168.6078	283.723	-0.051758	0.098145	-0.21924	-68.865	33.1426	578.915	-0.70752	0.43018	-0.71826	-37.062	15.169	28.996	0.21699	0.0051758	-0.033496	-19.641	29.4763	7.0142	0.19756	0.10156	0.07002
1.544	25.535	145.4639	549.6757	-0.41504	0.26221	-0.44385	27.0617	-191.526	1410.5221	-1.4958	0.83325	-1.5983	11.354	-199.096	1427.894	-0.82197	0.26299	-1.3319	-50.524	117.943	256.927	-0.031006	0.074219	-0.21045	-43.065	61.9406	736.515	-0.95654	0.44775	-0.80127	-44.548	44.319	5.427	0.20859	0.0051758	-0.034668	-15.536	63.042	13.8981	0.19189	0.10645	0.067383
1.546	-2.91	183.544	492.108	-0.38867	0.23975	-0.43066	10.8088	-130.407	1402.969	-1.5425	0.87549	-1.6304	22.577	-117.047	1465.122	-0.9619	0.31016	-1.3672	-22.008	109.789	266.071	-0.012207	0.056152	-0.20605	-50.633	114.533	816.101	-1.1651	0.47803	-0.86133	-80.5338	54.9023	2.554	0.20157	0.0024414	-0.034668	-35.794	53.37	12.0089	0.18515	0.10352	0.062891
1.548	-1.893	146.48	462.912	-0.34082	0.19824	-0.40234	33.3376	-140.614	1418.61	-1.5854	0.92822	-1.6812	-14.8379	-94.771	1447.776	-1.1248	0.3582	-1.3981	-86.7966	128.1202	239.938	0.0078125	0.036621	-0.19775	-108.8584	59.676	913.8387	-1.3765	0.52588	-0.92236	-40.982	36.1095	10.6827	0.19678	0.00029297	-0.03291	-18.533	0.3184	37.4015	0.17685	0.10049	0.057813
1.55	10.573	175.891	456.2211	-0.30444	0.16699	-0.38623	42.799	-72.544	1401.4945	-1.6094	0.9502	-1.7012	-7.34	-80.305	1449.994	-1.2957	0.41406	-1.4406	-54.66	67.362	241.7792	0.015137	0.023926	-0.19678	-91.21	78.836	970.938	-1.6304	0.6333	-0.98193	-50.328	67.266	-3.941	0.18994	-0.00048828	-0.033691	-59.547	63.005	37.9689	0.16514	0.096192	0.053516
1.552	-30.44	186.967	416.144	-0.26367	0.13818	-0.37402	49.817	-88.823	1339.759	-1.6323	0.97314	-1.7319	-15.8058	-21.942	1427.069	-1.439	0.48291	-1.4858	-47.071	128.013	229.9626	0.030273	0.0053711	-0.18945	-85.71	35.53591	996.579	-1.7397	0.71045	-1.0171	-57.077	51.4254	17.2159	0.18653	-0.0067383	-0.032617	-54.99522	20.821	33.6736	0.15244	0.090625	0.04834
1.554	-27.541	132.174	427.4362	-0.21143	0.10449	-0.34424	78.961	-99.009	1359.151	-1.6489	0.98096	-1.7574	10.17102	-60.283	1426.922	-1.5349	0.55303	-1.5282	-81.58489	125.584	192.012	0.03711	-0.0043945	-0.18237	-86.185	-26.4424	1040.858	-1.8789	0.90234	-1.0547	-18.604	47.537	32.0618	0.18438	-0.01377	-0.038574	-20.612	20.1833	45.3049	0.13477	0.085938	0.041504
1.556	-19.273	169.664	411.863	-0.1875	0.087891	-0.34033	85.121	-50.799	1350.869	-1.6553	0.9873	-1.7813	39.1919	-57.092	1458.65	-1.5839	0.621	-1.5854	-43.772	106.109	192.2885	0.036621	-0.014648	-0.17676	-65.998	-4.6074	1028.549	-1.8982	1.0994	-1.0779	-52.595	67.535	19.301	0.18359	-0.01455	-0.043653	-86.8066	79.3905	9.973	0.12725	0.09043	0.038769
1.558	-49.6664	150.623	388.916	-0.14014	0.055664	-0.32813	76.752	-107.208	1397.4155	-1.6401	0.99072	-1.8003	18.6464	-72.202	1462.27	-1.598	0.67568	-1.6433	-81.7759	149.327	155.461	0.02832	-0.025391	-0.1709	-90.604	-53.773	1022.785	-1.8706	1.2817	-1.1245	-53.651	39.3524	48.8804	0.19189	-0.015625	-0.049707	-50.63	18.43	21.9195	0.11572	0.094531	0.033594
1.56	-34.447	118.128	395.642	-0.10327	0.027099	-0.31201	108.789	-108.3018	1459.4768	-1.6265	0.98682	-1.8042	48.851	-126.053	1480.6343	-1.5835	0.70986	-1.7057	-51.128	94.244	142.3253	0.017578	-0.030762	-0.16797	-58.7744	-48.71501	1058.201	-1.6948	1.4087	-1.2065	-20.501	43.9017	31.209	0.19482	-0.016113	-0.056152	-45.681	56.255	14.062	0.11143	0.099221	0.031641
1.562	-51.316	159.51	348.6984	-0.074707	0	-0.29688	122.434	-108.25	1446.788	-1.5894	0.96533	-1.8062	50.977	-84.1515	1506.9734	-1.5718	0.729	-1.7671	-21.474	100.25	153.4823	0.0019531	-0.036621	-0.17188	-29.257	-8.944	1077.25846	-1.4495	1.4192	-1.2195	-47.009	34.1015	20.772	0.19902	-0.013965	-0.061426	-86.5257	56.1829	20.4834	0.11055	0.11504	0.034766
1.564	-42.923	99.625	323.2003	-0.039063	-0.037598	-0.28467	112.506	-146.91	1486.852	-1.5788	0.92993	-1.7947	71.93	-95.052	1505.894	-1.5526	0.73565	-1.8253	-58.2599	127.880648	121.792	-0.0083007	-0.040527	-0.17016	-34.5118	-56.315	1084.6817	-1.1914	1.3828	-1.2031	3.03	12.7875	33.612	0.21211	-0.0092773	-0.064453	-62.151	5.1501	45.2137	0.11328	0.13037	0.036621
1.566	-42.542	108.745	312.9893	-0.022461	-0.054199	-0.28223	128.448	-72.2747	1487.618	-1.5718	0.89502	-1.7808	73.418	-127.143	1544.47	-1.5327	0.73448	-1.88	-22.738	42.022	125.4514	-0.017578	-0.037109	-0.16943	13.898	-66.659	1088.8273	-0.95508	1.2734	-1.1309	-45.577	53.851	8.793	0.21328	-0.006543	-0.070703	-63.203	62.772	30.3479	0.11982	0.14502	0.043457
1.568	-67.1971	121.277	268.071	0.0029297	-0.086426	-0.27539	80.589	-64.1848	1465.395	-1.5645	0.86426	-1.7656	54.804	-67.241	1535.723	-1.5058	0.72705	-1.9265	-28.313	82.1676	98.621	-0.032715	-0.025879	-0.17334	10.319	-100.178	1077.29112	-0.91016	1.2051	-1.0996	-50.445	45.5846	30.92792	0.21328	-0.0032226	-0.074316	-57.491	23.9927	38.1828	0.12618	0.1502	0.047949
1.57	-42.797	64.869	268.4274	0.019776	-0.10083	-0.27393	49.454	-52.846	1509.207	-1.5503	0.8501	-1.7593	37.531	-77.688	1530.014	-1.4873	0.7168	-1.9701	-36.609	68.487	76.6218	-0.033203	-0.017578	-0.17676	-0.483999999999995	-120.6045	1143.391	-0.93164	1.043	-1.043	6.891	36.906	44.6822	0.21338	-0.0048828	-0.08252	-40.886	39.035	45.2953	0.14414	0.15293	0.056543
1.572	-40.001	129.5112	248.36181	0.032715	-0.1123	-0.26904	30.628	-22.811	1490.729	-1.502	0.83398	-1.7422	14.5448	-37.7434	1562.476	-1.4727	0.70508	-2.0039	-2.053	45.4682	91.1276	-0.041992	0.0039063	-0.17627	13.464	-39.123	1179.694	-0.99756	0.93359	-1.0112	-38.51	57.688	36.3999	0.20986	-0.010254	-0.09375	-68.1306	84.239	26.396	0.15947	0.14756	0.063867
1.574	-50.87789	111.6321	212.1789	0.039063	-0.12305	-0.25586	40.0669	-113.839	1487.901	-1.4577	0.82251	-1.742	19.3963	13.7011	1525.339	-1.4642	0.68095	-2.0157	-19.923	104.705	65.4253	-0.0354	0.022217	-0.17725	-12.288	-50.029	1185.4738	-1.0723	0.8457	-0.98828	-22.138	20.7318	42.302	0.20381	-0.013477	-0.10107	-59.4342	19.43252	30.3257	0.17627	0.1377	0.073242
1.576	-40.842	82.788	212.0177	0.038574	-0.12451	-0.25146	77.145	-98.055	1490.032	-1.4019	0.80322	-1.7554	12.7028	-47.8057	1510.947	-1.4718	0.65049	-2.0229	-21.243	48.9845	83.5899	-0.027832	0.036133	-0.18066	-35.557	-90.37	1179.2272	-1.1538	0.78076	-0.96826	-4.599	34.204	42.3105	0.19795	-0.017382	-0.11631	-32.899	61.307	26.94	0.18828	0.12236	0.085742
1.578	-59.6231	137.821	187.22	0.02832	-0.12256	-0.24121	47.206	-54.447	1408.9554	-1.311	0.78564	-1.7651	40.875	-15.7699	1485.9983	-1.4984	0.61923	-2.0198	-17.986	51.436	90.6582	-0.0063477	0.059082	-0.16943	-31.132	-130.858	1139.959	-1.1851	0.77393	-0.96631	-43.141	55.6617	39.55146	0.18408	-0.013672	-0.1252	-35.037	58.719	25.62393	0.20049	0.10781	0.095606
1.58	-64.773	83.9785	188.6953	0.026123	-0.11719	-0.23999	52.569	-44.066	1379.13969	-1.269	0.78369	-1.7612	29.205	-26.8301	1420.528	-1.5268	0.59599	-2.0179	-55.349	77.533	52.507	0.0019531	0.06543	-0.1665	-14.259	-233.6318	1162.129	-1.2261	0.79541	-0.99658	3.472	33.3331	51.01	0.16699	-0.010254	-0.13867	-11.667	-3.39789	51.842	0.20869	0.091015	0.10576
1.582	-38.136	106.6691	198.5544	0.017578	-0.10645	-0.24219	48.4459	51.445	1332.636	-1.1958	0.7876	-1.7593	39.609	-28.004	1430.458372	-1.5469	0.57422	-2.0039	-34.499	10.963	61.2393	0.013672	0.07959	-0.16602	4.958	-237.786	1234.4919	-1.2461	0.83545	-1.0371	-38.722	53.589	36.5762	0.15225	-0.0029297	-0.15332	-22.676	43.662	38.1472	0.21367	0.076367	0.11104
1.584	-59.061	119.139	152.591	0.0073242	-0.083984	-0.23975	27.87614	35.5209	1287.366	-1.1716	0.79517	-1.7493	25.426	64.151	1388.753	-1.5381	0.54941	-1.9881	-26.448	66.1243	26.294	0.029542	0.085693	-0.15429	-23.277	-253.9	1262.34557	-1.2749	0.87939	-1.0815	-63.453	20.1859	34.657	0.13184	0.0091797	-0.16865	-23.27	7.995	24.2398	0.2207	0.060059	0.11865
1.586	-24.355	52.974	144.571641	-0.0014648	-0.070801	-0.24707	41.971	0.765999999999998	1320.5829	-1.1479	0.79834	-1.7358	8.7612	45.4382	1360.821	-1.5057	0.51299	-1.9706	-51.208	46.123	5.011	0.041992	0.084961	-0.15088	-28.363	-325.947	1271.6411	-1.3433	0.92822	-1.1392	-9.392	6.1119	34.829	0.11426	0.029883	-0.17608	-6.874	-7.0162	49.5996	0.2167	0.050489	0.12031
1.588	-17.304	104.62	115.481	-0.0043945	-0.043945	-0.24951	30.282	27.5411	1296.506	-1.1128	0.79346	-1.7065	34.6456	53.4443	1362.215	-1.4573	0.47237	-1.9597	-29.532	10.55557	30.976	0.061523	0.086426	-0.13232	17.942	-306.193	1263.08	-1.3892	0.93994	-1.1655	-58.072	42.3877	4.262	0.093457	0.048633	-0.18711	-33.268	59.0349	30.5157	0.2206	0.034864	0.12305
1.59	-42.355	72.6455	96.741	-0.0073242	-0.030273	-0.25293	12.1999	-17.9863	1274.3763	-1.1001	0.79346	-1.689	7.2918	63.99632	1307.814	-1.4102	0.42275	-1.9458	-51.103	68.954	10.495	0.075684	0.080566	-0.12255	22.889	-302.07	1269.025	-1.4927	0.96533	-1.2241	-42.881	15.9491	31.677	0.070801	0.068848	-0.19385	-5.543	-4.5434	56.309	0.21826	0.030566	0.12578
1.592	-4.133	43.6992	100.9113	-0.0078125	-0.01123	-0.25488	-9.9702	39.349	1277.554	-1.0684	0.78125	-1.6533	16.7107	18.902	1320.8583	-1.3784	0.39746	-1.9312	-30.201	26.3345	24.8955	0.092773	0.075195	-0.10547	33.319	-257.672	1355.777	-1.5642	0.98266	-1.2497	-32.296	27.101	33.8473	0.054785	0.087988	-0.20489	-11.177	43.593	42.2746	0.21289	0.030078	0.11992
1.594	-27.373	94.416	86.792	-0.0019531	0.0063477	-0.25	-12.1962	77.775	1222.584	-1.0417	0.76489	-1.6257	-7.11	79.436	1310.087	-1.3669	0.38818	-1.9193	-21.379	23.6031	36.6387	0.1123	0.056641	-0.094727	11.542	-166.307	1413.713	-1.6226	1.0073	-1.2808	-69.1381	26.6744	17.6856	0.035645	0.10683	-0.21699	-16.878	39.402	17.137065	0.21094	0.026367	0.12256
1.596	-23.574	13.213	96.9565	0.0048828	0.014648	-0.24316	-17.92016	21.10881	1209.842	-1.0195	0.74023	-1.5898	-24.2904	76.856	1291.7502	-1.3624	0.40332	-1.905	-76.2675	67.968	9.163	0.12158	0.050293	-0.083984	-36.8106	-183.834	1449.1825	-1.6719	1.0449	-1.3164	-23.112	-9.449	61.548	0.017285	0.12715	-0.22676	-7.447	-5.26178	26.325	0.20605	0.031055	0.11719
1.598	-11.334	31.6267	104.4702	0.013184	0.026855	-0.23584	30.07	63.522	1203.0255	-0.99219	0.69336	-1.543	-7.589	59.485	1302.339	-1.3597	0.42715	-1.8929	-46.159	-1.2451	16.1464	0.13232	0.036621	-0.068359	-55.0239	-150.315	1502.947	-1.6909	1.063	-1.3335	-41.256	10.8852	55.889	0.0040039	0.15068	-0.23935	-30.431	58.469	23.8202	0.20224	0.038184	0.10849
1.6	-20.148	60.3558	74.819	0.020508	0.029785	-0.22705	6.2357	17.8539	1182.4399	-0.98438	0.67188	-1.5176	-16.496	88.667	1271.088	-1.3407	0.46123	-1.8781	-37.463	55.702	14.42	0.15088	0.015869	-0.053222	-62.255	-121.058	1505.76123	-1.7227	1.0996	-1.3594	-73.7456	-1.198	97.3073	-0.01123	0.16602	-0.24658	-33.995	18.573	17.0075	0.19092	0.04873	0.095996
1.602	-15.61	13.2399	76.2888	0.027832	0.033691	-0.21973	24.722	-4.139	1206.9578	-0.97314	0.62256	-1.4526	3.552	34.225	1221.896	-1.3154	0.48438	-1.8613	-71.5424	39.0031	6.4836	0.1582	-0.0024414	-0.037109	-44.117	-145.48	1525.1888	-1.7488	1.1233	-1.3767	-23.369	14.30177	149.2955	-0.030078	0.17373	-0.25908	-18.791	5.15	20.3238	0.18633	0.059277	0.083105
1.604	-27.935	83.475	66.0258	0.035156	0.026855	-0.20508	32.0613	48.8812	1150.4433	-0.9646	0.59716	-1.4067	16.39	47.702	1226.6261	-1.2775	0.49961	-1.8337	-39.139	-20.7349	28.5121	0.17627	-0.028809	-0.021484	-32.999	-78.725	1524.132	-1.7827	1.1548	-1.3901	-32.289	70.2341	173.772	-0.053222	0.17637	-0.27666	-52.725	62.9696	4.754	0.17578	0.075684	0.063477
1.606	-39.899	47.5558	48.7537	0.041016	0.023926	-0.19727	-7.054	0.122	1130.0451	-0.95166	0.57471	-1.3569	8.784	104.178	1196.502	-1.2389	0.50674	-1.8042	-66.7041	41.7101	11.921	0.18018	-0.042969	-0.0092773	-80.783	-82.54	1501.63	-1.8203	1.1992	-1.416	-22.8348	50.0061	267.287	-0.085254	0.17285	-0.30088	-33.498	10.3098	14.7416	0.16621	0.09082	0.046875
1.608	-35.407	14.8951	53.7264	0.047852	0.010742	-0.18213	49.1159	49.254	1123.6156	-0.92773	0.55469	-1.2969	-12.86	75.21	1194.3352	-1.2057	0.49698	-1.7726	-50.142	9.429	7.9496	0.19336	-0.069824	0.0053711	-76.6653	-108.827	1532.647	-1.8398	1.2246	-1.4219	-0.3463	47.4282	383.682	-0.133	0.16045	-0.33252	-31.071	51.298	26.3131	0.1455	0.11006	0.028516
1.61	-48.636	66.068	20.5385	0.054443	0.0090329	-0.17553	57.628	67.04	1057.622	-0.90771	0.55127	-1.2749	24.334	126.544	1178.1525	-1.181	0.48213	-1.7317	-30.061	27.6974	14.4531	0.19922	-0.088135	0.016358	-47.9906	-74.38	1537.976	-1.8804	1.2642	-1.439	-14.3755	50.4955	518.126	-0.19385	0.13525	-0.3667	-70.386	61.1512	8.1478	0.13183	0.13662	0.0085938
1.612	-36.071	3.2157	16.13045	0.062012	-0.0043945	-0.16064	34.036	46.206	1050.7694	-0.86768	0.53662	-1.2202	-0.920999999999999	119.1866	1111.278	-1.1699	0.46484	-1.6855	-51.657	83.244	12.298	0.20752	-0.10645	0.023926	-49.1046	-137.591	1560.264	-1.9077	1.2808	-1.4419	45.026	40.095	706.176	-0.27461	0.098143	-0.40195	-59.841	11.0334	24.9776	0.1208	0.15761	-0.013086
1.614	-43.964	38.259	26.2787	0.070313	-0.017578	-0.1499	26.45815	136.05	1018.8592	-0.83179	0.52368	-1.1805	-10.061	101.0025	1110.3096	-1.1618	0.44131	-1.6396	-42.246	24.3748	22.1315	0.20752	-0.12549	0.03418	-10.622	-129.748	1608.0326	-1.9395	1.2871	-1.4336	61.776	79.769	841.215	-0.38047	0.048047	-0.45118	-78.7723	56.111	19.831	0.11328	0.18457	-0.037598
1.616	-64.138	67.729	8.478	0.071777	-0.022461	-0.15039	12.147	145.748	994.3267	-0.80029	0.51025	-1.1401	8.672	177.304	1086.7951	-1.1573	0.43174	-1.5862	-17.105	61.992	17.0862	0.21143	-0.13623	0.038086	-22.87	-113.383	1612.8418	-1.9604	1.2896	-1.4312	28.0305	47.754	981.293	-0.51406	-0.0085936	-0.51172	-66.06426	11.764	18.7721	0.10859	0.20869	-0.061914
1.618	-44.541	11.2979	14.491	0.075195	-0.040039	-0.13135	10.277	173.888	998.009	-0.75439	0.49414	-1.0977	-21.137	153.493	1066.1927	-1.1488	0.42314	-1.5441	-29.197	50.2094	12.229	0.21143	-0.14502	0.043457	-30.956	-132.97	1650.447	-1.9683	1.2798	-1.4253	44.103	17.649	1098.36934	-0.69111	-0.071387	-0.57695	-41.019	-14.9981	38.374	0.10351	0.24179	-0.084668
1.62	-47.336	70.952	5.837	0.074707	-0.056152	-0.12378	-8.052	213.597	955.5913	-0.73584	0.48682	-1.0669	-31.4	188.746	1059.9843	-1.129	0.42158	-1.5059	-16.661	0.0815999999999999	38.849	0.20727	-0.15015	0.046387	-24.879	-53.2032	1643.607	-1.9507	1.2681	-1.3979	13.459	16.454	1129.304	-0.90381	-0.13477	-0.64111	-67.873	46.71179	9.036	0.10039	0.27187	-0.1085
1.622	-64.3385	37.339	3.6993	0.07666	-0.064453	-0.11279	9.239	138.243	929.5824	-0.69971	0.4668	-1.0117	-42.211	201.154	1001.493	-1.0913	0.41455	-1.4722	-51.076	62.015	32.6989	0.20557	-0.15625	0.049805	-49.1871	-60.9266	1625.671	-1.9282	1.2514	-1.3775	47.4758	-21.139	1181.837	-1.1608	-0.18877	-0.7125	-54.943	-6.0608	30.4551	0.096289	0.30352	-0.13047
1.624	-40.712	-5.8299	37.861	0.072754	-0.086426	-0.096191	16.112	136.3422	900.054	-0.6748	0.44702	-0.97363	-34.38	136.485	979.9935	-1.0423	0.40517	-1.4358	-22.817	29.3129	25.9039	0.19922	-0.15332	0.052246	-31.696	-82.6364	1664.366	-1.8945	1.2363	-1.3516	52.9778	7.892	1217.339	-1.443	-0.21631	-0.78203	-47.013	36.163	56.3	0.087891	0.32861	-0.1543
1.626	-56.216	63.865	15.59835	0.065918	-0.09082	-0.088379	-0.135000000000002	142.3358	849.191	-0.65527	0.42871	-0.92773	-11.432	165.85	952.59436	-0.9917	0.40244	-1.4011	-3.48	32.2739	25.9818	0.1958	-0.14844	0.053711	-13.523	-32.218	1631.543	-1.8374	1.2153	-1.3237	-5.667	0.1614	1243.871	-1.7434	-0.21435	-0.85977	-59.6829	48.3075	72.22	0.079395	0.35381	-0.18359
1.628	-58.5204	10.9589	7.06709	0.068848	-0.11377	-0.067871	-38.499	111.827	852.5987	-0.63428	0.40088	-0.86865	-34.545	140.0036	900.05927	-0.94131	0.3958	-1.3616	-31.857	76.963	5.783	0.19482	-0.14063	0.050781	-31.899	-56.82	1602.2497	-1.8086	1.2012	-1.3105	17.063	-49.303	1284.741	-2.0401	-0.1708	-0.92315	-39.187	5.6699	111.1013	0.07334	0.37432	-0.20977
1.63	-40.22	38.716	9.34549	0.066651	-0.1211	-0.054931	-13.019	157.042	826.1252	-0.62305	0.39063	-0.83984	-42.008	111.579	895.459	-0.88985	0.38857	-1.3189	-10.119	5.666	33.2649	0.19507	-0.12793	0.051514	-37.756	-15.156	1581.5227	-1.7495	1.1763	-1.2837	15.64	-29.823	1270.1365	-2.314	-0.069336	-0.98193	-57.422	75.575	158.768	0.065918	0.39033	-0.24218
1.632	-46.8035	51.986	-1.99	0.067383	-0.12695	-0.044434	-53.1463	128.193	761.645	-0.60059	0.36035	-0.77344	-61.978	164.2365	849.6617	-0.8418	0.37646	-1.2773	-12.496	46.5065	32.4216	0.19678	-0.11084	0.048828	-37.124	29.2865	1523.468	-1.707	1.1582	-1.2607	1.646	-65.164	1290.8851	-2.5364	0.12373	-1.0321	-69.317	45.2124	256.501	0.051172	0.40518	-0.27822
1.634	-36.955	-11.164	27.0863	0.068848	-0.13623	-0.033203	-42.399	117.0553	751.0955	-0.5835	0.34717	-0.7334	-64.068	120.078	808.6698	-0.79316	0.36494	-1.2256	-31.788	42.3476	22.2835	0.19531	-0.095703	0.035156	-35.191	-13.2561	1518.3339	-1.6655	1.1362	-1.2495	45.3726	-66.91	1323.0727	-2.6874	0.41728	-1.0636	-58.586	47.9873	388.546	0.02832	0.41895	-0.31348
1.636	-19.967	56.2167	25.1304	0.071777	-0.13965	-0.032227	-25.006	156.1438	702.711	-0.56201	0.3335	-0.68896	-45.826	142.395	800.781	-0.75049	0.34873	-1.1729	-0.0549999999999997	-8.4946	44.8874	0.19922	-0.091309	0.03125	-19.533	28.1913	1517.4015	-1.603	1.1157	-1.2261	15.905	-54.131	1300.2776	-2.7878	0.829	-1.1077	-83.57	116.554	501.761	-0.015723	0.42705	-0.33721
1.638	-28.989	46.3757	15.8783	0.07959	-0.14258	-0.010742	-68.0542	118.865	729.1732	-0.52148	0.31738	-0.63379	-46.915	160.3075	759.706	-0.71182	0.33818	-1.1202	-26.913	50.9809	33.7899	0.20557	-0.08252	0.030762	-14.449	12.8334	1483.69	-1.5698	1.106	-1.2183	6.529	-53.56	1322.2594	-2.8422	1.2113	-1.2281	-67.028	62.401	658.48	-0.072266	0.42969	-0.37949
1.64	-23.419	20.1771	25.5991	0.08667	-0.14258	-0.0014649	-49.2682	163.43449	735.156	-0.49951	0.31201	-0.60254	-60.505	123.344	747.69	-0.68516	0.32227	-1.067	-32.308	15.4403	28.7401	0.20434	-0.078125	0.022949	-19.542	5.20983	1490.752	-1.5166	1.0801	-1.1836	-21.648	25.357	1358.327	-2.7441	1.4746	-1.3945	-47.551	91.065	821.765	-0.14453	0.42031	-0.42989
1.642	-22.007	81.985	15.2421	0.1001	-0.14795	0.0073242	-71.4258	163.4287	671.0872	-0.44238	0.29785	-0.54492	-62.53	178.494	701.5311	-0.65527	0.30566	-1.0117	-32.228	25.605	37.6102	0.20459	-0.07373	0.02002	-24.019	85.364	1467.659	-1.4763	1.0637	-1.1794	-102.8143	64.534	1391.213	-2.3821	1.5823	-1.49	-68.419	90.511	946.336	-0.2292	0.40078	-0.49248
1.644	-21.012	34.1594	9.75649	0.10791	-0.146	0.018066	-77.8098	136.853	657.81	-0.39624	0.28907	-0.50708	-73.72	173.081	660.0676	-0.63369	0.28935	-0.95713	-49.7793	82.16	20.087	0.20215	-0.064941	0.015137	-44.963	58.686	1441.91931	-1.4409	1.0435	-1.1655	-75.999	43.486	1417.2565	-1.909	1.5961	-1.5148	-54.758	38.385	1085.8629	-0.3374	0.37598	-0.5625
1.646	-4.61000000000001	46.587	28.395	0.1123	-0.15234	0.018555	-35.571	181.751	619.5072	-0.35254	0.27148	-0.47461	-56.042	163.2015	666.383	-0.60791	0.27823	-0.90498	-44.9378	12.4051	39.5462	0.19873	-0.058594	0.01123	-33.331	77.25	1449.5857	-1.396	1.021	-1.144	-104.3148	8.538	1371.622	-1.4871	1.5196	-1.4961	-108.003	78.744	1166.114	-0.47998	0.35127	-0.63555
1.648	-18.942	70.88	16.6359	0.12256	-0.16113	0.030273	-49.225	168.409	567.2054	-0.29199	0.25342	-0.42334	-45.1	193.34	608.272	-0.57901	0.26611	-0.85029	-51.028	50.712	36.7746	0.18896	-0.053711	0.0063477	-37.148	75.375	1423.824	-1.3687	1.0151	-1.1343	-164.272	-86.9651	1353.144	-1.1926	1.3332	-1.4383	-109.88	18.735	1218.794	-0.66416	0.32002	-0.70771
1.65	-33.551	-0.0824999999999996	42.74	0.1294	-0.16333	0.03125	-34.213	173.174	541.78288	-0.26318	0.24219	-0.4043	-52.47	128.7915	565.9532	-0.55215	0.25009	-0.80137	-71.0719	39.6704	3.49	0.18408	-0.044189	0.0012207	-56.8399	-1.777	1421.1109	-1.3335	0.99072	-1.1167	-105.1203	-112.902	1385.423	-1.02	1.0708	-1.3628	-85.64	-46.723	1260.345	-0.88291	0.30127	-0.77647
1.652	-21.929	56.6928	41.3072	0.13477	-0.17236	0.039063	-26.415	193.952	519.553	-0.2124	0.21826	-0.35596	-45.162	149.9161	544.403	-0.52734	0.23047	-0.74609	-38.097	-7.7586	18.53	0.18262	-0.041992	-0.00097656	-36.296	33.855	1410.698	-1.2998	0.97412	-1.1132	-118.407	-132.764	1401.0599	-0.9416	0.80762	-1.3006	-105.936	-34.2231	1223.844	-1.142	0.29219	-0.83496
1.654	-17.53	43.8077	18.976	0.13916	-0.17969	0.042969	-64.4692	147.061	507.168	-0.18189	0.19532	-0.32715	-42.477	158.21878	514.096	-0.50293	0.21787	-0.6957	-51.695	63.769	9.788	0.17871	-0.032227	-0.0068359	-69.0801	18.753	1358.9037	-1.2676	0.95996	-1.1035	-122.16532	-182.701	1427.275	-0.91289	0.60195	-1.2454	-93.5442	-101.274	1217.808	-1.4214	0.30518	-0.896
1.656	-8.73699999999999	14.504	36.7557	0.14111	-0.17969	0.04541	-27.508	132.728	486.018	-0.15674	0.1709	-0.30176	-59.0172	119.403	499.8906	-0.47725	0.20205	-0.64756	-58.2116	12.5067	25.8678	0.18408	-0.03125	-0.0063477	-61.257	12.953	1359.146	-1.2222	0.93604	-1.0913	-66.383	-197.105	1400.17	-0.91094	0.46406	-1.2012	-77.74804	-83.602	1206.39	-1.6974	0.35029	-0.95205
1.658	-13.482	60.5443	22.6623	0.14063	-0.18555	0.041504	-25.048	107.498	434.761	-0.12207	0.13867	-0.24609	-41.049	161.6987	472.9626	-0.45537	0.18682	-0.59443	-39.19	3.7797	32.19008	0.19043	-0.026855	-0.0063477	-60.592	73.863	1316.5829	-1.2051	0.9209	-1.0859	-63.693	-236.243	1373.299	-0.92764	0.37861	-1.1859	-111.208	-63.62	1197.241	-1.9265	0.43233	-1.0034
1.66	-19.247	1.945	21.5409	0.14526	-0.18555	0.039307	-30.178	93.352	419.2798	-0.10156	0.12793	-0.22363	-32.934	136.7939	422.873	-0.43535	0.17422	-0.54649	-61.9918	56.1889	12.315	0.19971	-0.028809	-0.021729	-81.238	38.623	1271.8779	-1.1753	0.89111	-1.0757	-43.9168	-251.652	1425.976	-0.95459	0.34521	-1.2085	-71.9624	-87.8467	1190.764	-2.0749	0.57139	-1.0363
1.662	-16.825	17.455	41.299	0.14307	-0.18848	0.039063	3.539	156.836	407.107	-0.087891	0.11914	-0.19775	-37.689	120.0956	413.3991	-0.4082	0.16406	-0.49609	-37.847	-1.357	20.24349	0.20752	-0.024414	-0.025391	-36.353	83.108	1278.0881	-1.1452	0.87133	-1.0651	-45.029	-197.806	1477.304	-0.96319	0.36826	-1.2526	-39.34	-72.205	1164.282	-2.1234	0.80605	-1.0566
1.664	-34.321	51.1766	19.8069	0.13818	-0.18604	0.030762	-33.182	155.505	384.7535	-0.059082	0.094238	-0.14404	-21.859	164.677	394.224	-0.3749	0.15898	-0.4544	-29.083	46.47	36.3656	0.22363	-0.024414	-0.032715	-36.235	128.0102	1254.456	-1.1167	0.84521	-1.0562	-57.868	-193.445	1516.432	-0.95801	0.41719	-1.2829	-47.668	-141.104	1148.91	-2.0957	1.0859	-1.0879
1.666	-27.752	-9.9963	49.047	0.13818	-0.18213	0.023926	-9.425	141.145	391.9933	-0.045898	0.086426	-0.12598	-47.661	134.01487	383.027011	-0.34024	0.14619	-0.4085	-66.8018	48.861	16.1949	0.22559	-0.025879	-0.041504	-48.1569	98.5637	1252.766	-1.0698	0.8208	-1.0464	-17.926	-141.1557	1538.429	-0.97481	0.46914	-1.3043	-44.049	-155.33859	1176.2472	-1.9629	1.2891	-1.1604
1.668	-39.858	36.0856	53.353	0.13037	-0.17041	0.019043	3.03	137.235	361.636	-0.022949	0.075684	-0.097168	-21.763	155.01	388.567	-0.30664	0.13955	-0.36474	-36.406	-4.6638	29.8391	0.23682	-0.030762	-0.057129	-29.866	162.616	1232.2267	-1.0479	0.81104	-1.043	-38.238	-92.999	1489.427	-1.0301	0.5207	-1.3332	-72.0552	-91.027	1202.359617	-1.698	1.3894	-1.223
1.67	-52.3163	18.88	21.111	0.12793	-0.15674	0.0087891	-26.18	77.28	376.393	-0.0026855	0.077881	-0.083252	-4.615	146.9503	354.52424	-0.27422	0.13193	-0.3209	-29.207	46.601	1.484	0.23608	-0.036133	-0.062012	-66.6164	155.484	1173.8628	-0.99023	0.77832	-1.0273	-30.9877	-92.205	1471.156	-1.127	0.56787	-1.3672	-58.5267	-108.496	1238.58	-1.3461	1.3946	-1.2226
1.672	-42.229	-6.447	20.063	0.12793	-0.1543	0.0039063	16.114	87.712	364.667	0.023926	0.085449	-0.0625	-31.867	100.254	350.045	-0.25	0.11719	-0.28516	-31.489	5.0938	11.7165	0.22998	-0.035156	-0.073242	-45.452	146.4134	1142.6628	-0.95899	0.76123	-1.0142	4.192	-58.607	1482.05	-1.2608	0.59932	-1.3932	-78.5727	-85.07	1261.6709	-1.0424	1.3369	-1.1791
1.674	-54.9438	61.83	9.952	0.13184	-0.14111	-0.00048828	5.34200000000001	86.092	295.0434	0.060059	0.095215	-0.050293	-3.684	133.2077	314.9636	-0.21387	0.10156	-0.2458	-22.368	3.81129	35.897	0.20947	-0.036133	-0.09082	-6.115	200.214	1108.275	-0.92334	0.74072	-0.99561	-21.914	-53.091	1472.396	-1.4011	0.62666	-1.4138	-125.678	-135.64	1229.466	-0.87744	1.2368	-1.1167
1.676	-70.0779	15.5869	9.7179	0.13404	-0.13208	-0.0092776	-18.298	77.226	259.9081	0.07666	0.09375	-0.039063	-24.736	120.1178	272.581	-0.18965	0.081641	-0.20889	-32.107	59.825	16.408	0.19336	-0.035645	-0.094238	-18.724	150.9	1070.2036	-0.8877	0.70508	-0.98438	61.796	-59.984	1506.2004	-1.5218	0.65674	-1.4408	-60.983	-255.147	1241.031	-0.87822	1.0681	-1.0472
1.678	-46.137	25.3985	29.29741	0.13965	-0.12744	-0.019043	-1.183	92.82	231.3627	0.10938	0.1001	-0.020996	-36.984	104.2096	262.89464	-0.16426	0.066016	-0.17373	-16.073	8.27757	16.8842	0.17383	-0.033203	-0.1167	-0.594000000000001	160.128	1076.5351	-0.87402	0.68945	-0.9707	92.57	-19.552	1495.623	-1.6081	0.68565	-1.4812	-46.76	-283.6684	1282.812	-0.96758	0.87618	-0.99414
1.68	-46.563	52.722	-5.049	0.14697	-0.11572	-0.030273	-41.568	74.15125	211.4895	0.13062	0.10058	-0.016845	-17.135	136.668	229.278	-0.1414	0.050195	-0.13584	-7.72199999999999	63.187	9.16823	0.15722	-0.02417	-0.1311	-4.917	165.6292	1020.708	-0.83545	0.65674	-0.94482	83.242	-56.6059	1511.137	-1.6582	0.7207	-1.5254	-54.4719	-326.849	1332.4317	-1.1004	0.70664	-0.9457
1.682	-47.804	-8.6838	11.4554	0.15234	-0.10986	-0.040039	-27.955	67.1664	218.0614	0.14795	0.097656	0.00097656	-56.3928	94.3544	220.476	-0.11914	0.033203	-0.10889	-30.873	66.254	7.7702	0.13916	-0.014648	-0.146	-14.885	102.95	998.995	-0.80517	0.62964	-0.92993	132.196	-51.595	1542.969	-1.684	0.76172	-1.575	-29.462	-370.081	1349.92	-1.2352	0.58701	-0.90283
1.684	-32.809	39.8165	29.0561	0.15771	-0.1001	-0.0625	-21.233	86.808	192.539	0.16553	0.10498	0.0043945	-37.28	97.8613	230.4169	-0.099022	0.024121	-0.077246	-11.661	6.02359	38.459	0.12109	0.0087891	-0.16553	20.729	146.486	965.45	-0.7793	0.60547	-0.91016	105.557	-43.837	1533.1988	-1.705	0.81065	-1.6312	11.778	-358.946	1318.8132	-1.3579	0.50732	-0.87451
1.686	-39.478	24.2323	18.849	0.15869	-0.095703	-0.075439	-73.9499	67.4628	179.615	0.17334	0.10352	0.01123	-32.308	104.536	200.522	-0.072558	0.018262	-0.046778	-20.413	65.414	25.4869	0.10791	0.022461	-0.18311	-3.895	125.718	913.021	-0.74023	0.56738	-0.88281	58.753	-68.33	1570.489	-1.7444	0.86885	-1.7018	57.87227	-396.326	1325.594	-1.4492	0.49453	-0.88672
1.688	-24.593	0.0710000000000015	32.7404	0.15674	-0.081543	-0.083008	-53.155	90.22481	191.71932	0.18262	0.1084	0.012695	-64.954	76.9903	207.6138	-0.047949	0.019824	-0.026855	-16.19	16.05	13.5784	0.083008	0.044922	-0.20557	9.499	140.4684	905.4547	-0.72314	0.54932	-0.87354	100.51	-38.487	1585.586	-1.7973	0.92383	-1.7738	92.244	-362.397	1406.0659	-1.5153	0.53672	-0.92226
1.69	-22.82	64.816	11.377	0.15234	-0.071777	-0.10889	-60.913	116.515	145.761	0.18896	0.11499	0.012207	-24.823	127.021	199.8829	-0.01748	0.013867	-0.012207	-14.542	0.161399999999999	33.1125	0.06958	0.057129	-0.2251	28.467	200.968	868.422	-0.69629	0.51172	-0.83594	45.551	-63.429	1557.626	-1.8589	0.9751	-1.8237	53.0662	-308.583	1456.577	-1.5559	0.59922	-0.98554
1.692	-39.88	7.1571	4.5791	0.14941	-0.064453	-0.12012	-55.193	98.73441	128.498	0.18848	0.11914	0.016113	-57.7821	117.686	160.74	0.0097656	0.0078125	0.0097656	-32.899	41.106	23.881	0.056641	0.071289	-0.24756	-21.8814	164.144	847.9303	-0.67334	0.48779	-0.81006	47.5296	-81.618	1569.869	-1.9224	1.0253	-1.854	31.11	-301.121	1529.194	-1.5967	0.66758	-1.0533
1.694	-34.484	1.93161	20.8935	0.13623	-0.052734	-0.1377	-34.024	109.447	114.7117	0.19385	0.12549	0.016602	-59.059	105.6746	168.29816	0.037207	0.0030274	0.026074	-34.883	-20.1352	55.7303	0.018066	0.086914	-0.27344	-1.431	192.928	833.691	-0.6543	0.45898	-0.78516	87.16	-39.111	1543.774	-1.9766	1.064	-1.8617	-14.451	-232.1985	1559.369	-1.646	0.72705	-1.1187
1.696	-34.304	32.212	-4.653	0.12305	-0.042481	-0.15527	-73.3657	94.023	94.757	0.19336	0.1333	0.019043	-29.957	119.717	128.743	0.064844	0.0016602	0.036133	-31.279	19.882	72.7523	-0.0068359	0.09082	-0.29053	0.344999999999999	205.864	780.7977	-0.62891	0.42383	-0.75586	35.649	-23.5413	1514.7107	-2.0031	1.0828	-1.857	-62.7852	-200.436	1550.7199	-1.7142	0.7709	-1.1881
1.698	-27.742	-9.391	6.1511	0.10791	-0.030762	-0.16748	-56.6115	77.6404	111.2033	0.18994	0.14209	0.020996	-62.5802	66.738	129.189	0.088282	-0.0081054	0.047851	-38.795	28.429	66.173	-0.074707	0.089355	-0.3125	-15.468	172.30326	744.7203	-0.6123	0.4082	-0.74414	78.58	8.7837	1502.394	-2.0057	1.0916	-1.8428	-22.686	-174.986	1563.0781	-1.7882	0.81495	-1.2523
1.7	1.085	51.338	15.2856	0.091309	-0.018555	-0.19385	-31.045	99.896	82.352	0.18774	0.15284	0.023926	-30.505	76.7449	132.9655	0.11026	-0.0081054	0.059375	-19.456	-19.76911	143.0417	-0.14038	0.086914	-0.33228	22.881	206.724	705.6817	-0.57764	0.37549	-0.70654	33.659	25.9456	1437.981	-1.9819	1.0737	-1.8159	-41.655	-115.589	1549.265	-1.8538	0.84463	-1.2975
1.702	-8.909	43.721	13.3967	0.073242	-0.01709	-0.20654	-71.4398	65.867	82.9464	0.19287	0.16211	0.024414	-54.394	90.023	103.834	0.12598	-0.01123	0.066895	-48.8571	47.429	183.306	-0.21582	0.069824	-0.3584	-12.754	196.777	659.019	-0.53857	0.33496	-0.67529	19.0349	15.807	1382.381	-1.9339	1.0212	-1.7882	-47.784	-130.152	1548.828	-1.9011	0.85869	-1.3237
1.704	-8.645	1.9189	41.0006	0.047852	0.00097656	-0.2334	-43.052	51.552	80.4174	0.20068	0.16504	0.025879	-55.47	71.5188	111.3498	0.13838	-0.011817	0.071484	-29.0067	15.163	230.379	-0.33447	0.043945	-0.41309	-23.624	171.9992	651.3021	-0.51904	0.31934	-0.65576	59.018	48.534	1380.267	-1.8769	0.95323	-1.7437	-55.739	-125.644	1584.264	-1.937	0.87354	-1.3433
1.706	4.71	55.043	30.297	0.016357	0.0061036	-0.25513	-47.484	57.8141	38.919	0.20215	0.17041	0.032715	-25.496	95.04	101.97904	0.15391	-0.013868	0.075391	14.479	18.886	360.074	-0.40625	0.018066	-0.4502	7.361	194.191	612.047	-0.47754	0.28125	-0.62305	14.4088	75.028	1358.54	-1.8108	0.8919	-1.7097	-89.062	-114.914	1610.508	-1.9684	0.89414	-1.357
1.708	-21.296	6.1023	42.8163	-0.024414	0.012695	-0.27246	-62.6447	50.611	49.7508	0.20361	0.17188	0.024902	-58.596	67.755	79.2263	0.16094	-0.014648	0.084375	-17.1352	94.1579	482.459	-0.58008	-0.030762	-0.54688	-49.2585	161.81446	582.1051	-0.44482	0.25684	-0.60303	17.274	74.747	1359.336	-1.7333	0.83896	-1.6806	-40.1286	-153.432	1648.389	-1.9969	0.93515	-1.3832
1.71	-16.94	19.2755	85.7724	-0.10352	0.013672	-0.29932	-12.128	86.437	45.7378	0.19971	0.16186	0.027343	-43.777	55.88696	86.6775	0.16133	-0.012012	0.089063	-25.8183	46.332	629.492	-0.74463	-0.079346	-0.6084	-36.924	177.7384	571.99735	-0.41748	0.22705	-0.57666	1.562	114.663	1302.86	-1.6577	0.80908	-1.6675	-17.643	-138.849	1671.69	-2.0313	0.9789	-1.4129
1.712	-18.56	58.695	93.62384	-0.14404	0.0097656	-0.3042	-41.5224	76.096	63.7818	0.19287	0.1543	0.03125	-16.552	81.433	72.9296	0.15967	-0.0058594	0.092773	28.1907	69.119	739.722	-0.94043	-0.11816	-0.66455	-32.609	193.734	523.146	-0.38232	0.18311	-0.55225	-51.368	114.043	1251.333	-1.5752	0.78808	-1.6639	-32.631	-138.332	1699.88	-2.0707	1.0375	-1.4492
1.714	-20.99	-1.9493	118.87148	-0.23877	0.0053711	-0.33691	-35.737	58.03971	87.313	0.18604	0.14063	0.024414	-58.2823	53.47777	68.77185	0.16368	-0.0015625	0.096387	13.9578	62.069	836.738	-1.2612	-0.14844	-0.7417	-74.803	158.6319	519.46776	-0.37109	0.16211	-0.52832	-31.6553	109.328	1272.607	-1.4823	0.77705	-1.6577	-42.109	-138.71	1735.792	-2.1128	1.1157	-1.4976
1.716	-5.221	36.28	165.9043	-0.32105	-0.0083009	-0.36743	-0.114000000000004	61.332	49.7701	0.1792	0.13086	0.026855	-35.974	59.5411	85.834	0.16777	0.0055664	0.09248	3.589	11.308	964.4671	-1.4434	-0.14941	-0.77734	-31.55	195.855	503.2871	-0.33887	0.12402	-0.49902	-47.5158	115.821	1258.414	-1.3847	0.77002	-1.6468	-88.2127	-85.087	1749.668	-2.159	1.1996	-1.55
1.718	-24.4999	32.7853	194.047	-0.40918	-0.023438	-0.40674	-34.607	52.7942	41.4276	0.15625	0.11719	0.026855	-21.354	62.122	52.4609	0.18067	0.016114	0.10225	0.334	61.055	1052.6317	-1.791	-0.095215	-0.86621	-59.0804	167.688	465.7398	-0.31836	0.089356	-0.46972	-61.6409	75.39	1270.0562	-1.2985	0.76689	-1.6301	-135.11	-87.819	1768.203	-2.1942	1.2583	-1.6137
1.72	-4.7679	9.403	342.8917	-0.56934	-0.052246	-0.4624	23.949	63.9972	50.8778	0.13598	0.11231	0.022217	-49.52	30.5541	52.783	0.18662	0.025683	0.10185	-9.433	4.493	1094.33	-2.0166	0.011231	-0.92285	-58.405	141.896	480.918	-0.30322	0.062012	-0.44678	-8.996	102.084	1246.3073	-1.2227	0.76367	-1.6074	-110.967	-95.35	1800.451	-2.209	1.32	-1.6465
1.722	8.5423	76.6414	457.857	-0.6626	-0.05957	-0.49561	-7.889	73.012	15.107	0.11816	0.10938	0.02002	2.329	57.7484	46.3504	0.19824	0.033203	0.10254	6.979	-5.785	1116.033	-2.2109	0.16406	-0.9834	-30.254	173.3071	444.364	-0.27393	0.030273	-0.41943	-64.157	105.4766	1195.999	-1.1679	0.76045	-1.5702	-117.165	-68.945	1790.141	-2.2038	1.3587	-1.6605
1.724	-47.3578	50.393	565.99	-0.90186	-0.083008	-0.55322	-22.315	54.3507	22.6207	0.086914	0.11426	0.014648	-21.652	44.8758	25.7879	0.2082	0.035254	0.1041	0.695999999999998	19.3113	1109.21	-2.3672	0.46094	-1.0479	-66.1057	133.135	409.2995	-0.26367	0.01709	-0.40967	-2.592	86.453	1193.1459	-1.1352	0.7543	-1.5388	-66.156	-82.6012	1761.728	-2.1753	1.3755	-1.6597
1.726	8.728	57.0648	687.9312	-1.1219	-0.094726	-0.61011	18.763	51.674	17.2619	0.073242	0.11719	0.0053711	-39.676	21.38	44.657	0.2123	0.037891	0.10811	-9.6285	-64.772	1143.863	-2.4023	0.65234	-1.0762	-35.138	153.4772	399.824	-0.2334	-0.0029297	-0.39746	16.765	111.239	1179.206	-1.1152	0.74531	-1.4986	-68.225	-35.927	1707.678	-2.1255	1.3645	-1.6481
1.728	4.862	77.653	769.761	-1.3628	-0.095703	-0.66553	-45.5958	46.794	3.211	0.057617	0.13184	0.0048828	-12.932	38.0651	30.5237	0.21621	0.0375	0.10771	3.762	-35.936	1180.44	-2.4082	1.1016	-1.1348	-14.615	151.5449	358.35259	-0.20679	-0.021973	-0.37646	-35.809	118.78	1156.436	-1.0994	0.73301	-1.4662	-101.4718	-5.5543	1644.775	-2.0537	1.3424	-1.6187
1.73	-20.918	25.1847	903.3448	-1.6953	-0.056641	-0.75195	-22.31	31.5867	43.69	0.049561	0.14453	0.00024414	-57.293	8.7616	17.3263	0.21934	0.029297	0.11103	-2.167	-22.69	1174.702	-2.3716	1.4868	-1.2827	-55.515	123.192	338.5223	-0.18164	-0.036133	-0.36621	50.9002	128.686	1152.476	-1.083	0.73047	-1.4316	-67.963	-25.5664	1630.38	-1.9819	1.308	-1.5798
1.732	3.848	71.069	994.8912	-1.855	-0.016602	-0.8042	0.798000000000002	43.083	33.7189	0.044434	0.15869	-0.0063477	-22.601	28.7346	35.5508	0.2124	0.023926	0.10938	30.891	-67.9648	1201.586	-2.2852	1.5898	-1.3789	-17.25	144.5362	318.5366	-0.15576	-0.056152	-0.35547	26.0292	162.3604	1103.3171	-1.0652	0.70869	-1.3987	-57.042	16.4499	1614.566	-1.915	1.2598	-1.5364
1.734	-30.75	55.96	1021.7769	-2.1563	0.10645	-0.90625	-55.306	32.1388	33.1147	0.050293	0.18066	0.00048828	-23.158	39.938	4.269	0.20293	0.014258	0.10381	25.26	-26.8835	1202.6403	-1.894	1.6235	-1.4819	-54.2639	118.213	281.715	-0.14551	-0.063965	-0.34473	20.9948	172.839	1066.3104	-1.0477	0.70039	-1.3617	-30.63	-16.44842	1597.643	-1.8613	1.2109	-1.502
1.736	-33.136	9.726	1074.513	-2.3289	0.2561	-0.98415	-16.488	22.9019	44.1837	0.05957	0.19287	0.00097656	-46.703	11.9448	26.3531	0.18779	0.0075195	0.10048	8.826	-81.323	1201.86143	-1.5046	1.5607	-1.4597	-24.061	98.655	281.5902	-0.12842	-0.083008	-0.33643	47.3523	191.547	1056.7371	-1.0313	0.69101	-1.318	3.12	-11.8517	1597.7573	-1.8208	1.1771	-1.4665
1.738	-17.398	15.90381	1102.01	-2.4258	0.45605	-1.0664	-29.415	28.1151	24.512	0.07959	0.20508	0.0083008	-34.975	36.3663	28.8885	0.17451	0.0020507	0.091504	19.008	-89.963	1226.8202	-1.1836	1.4434	-1.4209	-24.358	130.2506	269.5961	-0.11035	-0.092773	-0.31836	-13.427	209.731	1013.859	-1.0159	0.68564	-1.2811	-26.723	48.934	1542.326	-1.7934	1.1514	-1.4352
1.74	-27.991	-39.686	1092.816	-2.4395	0.82617	-1.1523	-53.8641	6.261	33.6488	0.095217	0.21216	0.014893	-52.395	29.7530705	0.0210000000000008	0.15556	-0.0019531	0.087989	-43.747	-22.28	1232.535	-0.94678	1.1899	-1.353	-56.416	114.5162	249.5769	-0.097656	-0.1001	-0.31934	1.07100000000001	179.998	999.615	-1.002	0.66797	-1.2441	-28.888	41.578	1526.962	-1.7711	1.1379	-1.4176
1.742	-40.975	-48.0942	1121.861	-2.4351	1.0181	-1.2046	-15.615	22.0497	30.3658	0.11182	0.21045	0.020996	-45.11	23.373	24.8546	0.13525	0.0029297	0.084961	-56.491	-36.38	1275.6524	-0.89258	1.0449	-1.3164	-20.193	124.8916	266.1192	-0.07666	-0.10742	-0.30957	-28.736	195.656	968.1891	-0.98584	0.65732	-1.2034	-15.993	80.57	1514.9043	-1.7378	1.1333	-1.4083
1.744	-48.141	-0.927	1132.026	-2.3223	1.2891	-1.3691	-53.703	30.5806	4.3308	0.13281	0.20752	0.03125	-15.585	37.8193	23.7765	0.11728	0.014941	0.084766	-62.285	-18.913	1290.059	-0.84668	0.80273	-1.2695	-15.006	134.699	228.434	-0.068848	-0.10693	-0.30664	-45.8531	177.154	926.6023	-0.96719	0.63848	-1.1699	-40.438	49.1332	1513.8197	-1.6973	1.1348	-1.3984
1.746	-33.442	-49.9	1175.0898	-2.0222	1.3489	-1.4353	-39.611	17.142	37.3325	0.14111	0.19873	0.039063	-64.6605	17.566	-1.5491	0.10059	0.027832	0.07959	-105.921	-55.581	1264.645	-0.83325	0.67651	-1.2312	-40.057	96.926	220.9305	-0.049316	-0.11328	-0.3042	-2.86	150.7726	922.538	-0.93711	0.62012	-1.1359	4.321	-24.498	1532.727	-1.6512	1.1359	-1.3891
1.748	-20.608	-17.263	1212.36256	-1.605	1.3071	-1.4331	-41.3	37.6293	18.517	0.14941	0.18311	0.05127	-34.231	28.721	14.5412	0.083789	0.048926	0.078418	-80.8845	-151.1553	1256.365	-0.83545	0.58057	-1.2026	5.234	109.769	205.3102	-0.040039	-0.11035	-0.30175	-22.85	186.324	877.231	-0.90254	0.60371	-1.1009	-12.118	-17.228	1513.25341	-1.6059	1.1377	-1.3762
1.75	-29.151	-40.756	1204.80908	-1.0972	1.1333	-1.3784	-89.571	17.759	30.3319	0.15967	0.16992	0.060791	-21.685	43.473	-11.14	0.081348	0.070508	0.072949	-79.0285	-158.224	1276.968	-0.85645	0.5127	-1.2148	-23.704	91.0745	164.875	-0.022949	-0.10596	-0.29834	-30.385	154.2603	844.0233	-0.86328	0.58984	-1.0625	-16.987	-39.226	1471.7514	-1.5667	1.1302	-1.3683
1.752	-24.438	-82.2296	1241.3716	-0.93701	1.0083	-1.355	-34.648	17.2117	40.1854	0.16113	0.14746	0.069824	-79.8477	34.1782	13.9241	0.07959	0.091309	0.077148	-87.7217	-210.069	1321.291	-0.86523	0.50195	-1.2363	-35.712	77.082	160.678	-0.013184	-0.10742	-0.29395	2.329	150.60352	821.0461	-0.82529	0.57177	-1.0238	6.818	-33.725	1455.827	-1.5352	1.1192	-1.3568
1.754	-37.146	-23.56	1282.0279	-0.77295	0.73291	-1.3101	-62.1483	31.4933	14.8739	0.15674	0.12842	0.074707	-43.589	44.5105	38.84506	0.085156	0.10634	0.072558	-51.413	-219.414	1343.399	-0.87109	0.5332	-1.292	-16.025	89.9047	142.782	-0.0078125	-0.10449	-0.28809	-60.786	160.731	761.934	-0.79258	0.5503	-0.98125	-36.735	19.514	1383.76627	-1.5059	1.1035	-1.3398
1.756	-68.389	-11.596	1297.531	-0.74195	0.54028	-1.2878	-60.226	13.70924	26.934	0.15674	0.11914	0.081055	-50.882	37.3173	5.3935	0.09619	0.12158	0.074805	-55.592	-194.778	1315.9925	-0.87061	0.58252	-1.3191	-79.0807	50.551	130.127	0.00097656	-0.094238	-0.28174	-45.841	117.983	754.4401	-0.75469	0.53389	-0.94492	-26.673	-13.7	1343.328	-1.4837	1.0781	-1.3202
1.758	-86.572	13.133	1331.4694	-0.73584	0.37549	-1.2593	-27.629	19.1673	11.0265	0.15674	0.104	0.083496	-55.004	31.2123	19.8819	0.10362	0.13213	0.077929	-26.257	-239.596	1309.969	-0.88672	0.62695	-1.3379	-32.53	57.23	145.6877	0.0051269	-0.086181	-0.28003	-44.541	151.623	744.728	-0.72129	0.51563	-0.90332	-18.881	20.644	1319.1643	-1.4542	1.047	-1.2932
1.76	-97.457	24.132	1302.542	-0.75732	0.22656	-1.2202	-67.621	25.0689	-3.918	0.15942	0.099853	0.084961	-23.002	53.502	17.9064	0.11621	0.13603	0.086621	-12.455	-211.822	1361.449	-0.97803	0.66455	-1.3667	-22.35	82.666	117.516	0.0092773	-0.077148	-0.28076	-86.3449	156.318	691.673	-0.68311	0.49902	-0.85498	-18.938	42.79	1292.8	-1.4147	1.0152	-1.2752
1.762	-98.4237	-88.1858	1302.27	-0.78711	0.17773	-1.2207	-30.988	19.3684	14.1254	0.15625	0.10059	0.081543	-62.2332	36.9456	16.65	0.12402	0.13623	0.094727	-35.186	-167.852	1405.625	-1.0425	0.67822	-1.3843	-71.2412	62.8856	123.6447	0.020996	-0.066406	-0.26709	-41.191	139.54	684.727	-0.65322	0.48076	-0.80909	-6.92	42.8365	1313.685	-1.3689	0.97866	-1.2517
1.764	-80.47	-128.604	1327.3402	-0.85547	0.13965	-1.248	-3.164	32.3309	12.533	0.15479	0.10645	0.067383	-26.824	42.6773	38.8036	0.1291	0.13145	0.099807	-22.252	-167.912	1447.773	-1.2065	0.69385	-1.4097	-41.734	82.685	119.1008	0.025879	-0.055176	-0.26514	-104.731	181.4223	613.581	-0.61905	0.45625	-0.76631	-45.1742	128.392	1281.2143	-1.332	0.94727	-1.2246
1.766	-95.4763	-152.536	1343.13321	-0.9082	0.17383	-1.2841	-47.1327	19.946	17.8799	0.15527	0.1084	0.058105	-18.678	56.902	15.539	0.13369	0.11739	0.11787	-35.60506	-103.511	1443.6424	-1.3299	0.7063	-1.4343	-84.9498	67.688	75.224	0.037109	-0.04541	-0.2627	-104.398	161.701	565.4731	-0.58428	0.43555	-0.72217	-67.04896	123.772	1240.709	-1.3061	0.93014	-1.2012
1.768	-82.631	-167.114	1382.9663	-0.95361	0.23682	-1.3198	3.668	1.73	28.3106	0.15967	0.11523	0.04541	-48.756	36.5137	15.0781	0.13174	0.11075	0.12686	-43.486	-88.342	1418.6533	-1.4448	0.72998	-1.4604	-71.748	51.6658	92.2696	0.046875	-0.038818	-0.2566	-70.829	181.865	566.6987	-0.55195	0.41426	-0.675	-63.914	144.568	1214.5259	-1.2831	0.90845	-1.1873
1.77	-58.001	-102.374	1380.87	-1.0269	0.34424	-1.3706	-19.492	19.572	4.3747	0.15356	0.12891	0.028809	-8.306	42.0311	39.4653	0.13086	0.099807	0.13672	-18.5012	-87.899	1436.6683	-1.5527	0.77539	-1.5215	-38.76	72.047	62.083	0.058105	-0.03125	-0.25049	-86.4767	196.604	529.303	-0.51709	0.39307	-0.62939	-67.5317	186.031	1149.733	-1.2632	0.87751	-1.1763
1.772	-68.318	-136.721	1339.732	-1.0767	0.38916	-1.394	-41.391	8.4131	19.6845	0.13867	0.146	0.0053711	-44.478	38.0279	15.941	0.12744	0.087891	0.14404	-25.291	-38.697	1466.329	-1.5918	0.80469	-1.5586	-72.1916	42.9197	58.7608	0.073242	-0.018555	-0.23926	-80.15	136.011	525.9916	-0.4875	0.36758	-0.58281	-57.2671	132.578	1123.6323	-1.2425	0.8637	-1.1532
1.774	-64.916	-184.175	1378.909	-1.1953	0.45313	-1.4336	19.296	19.0265	20.0928	0.11865	0.17773	-0.014648	-27.068	39.59344	32.4494	0.12265	0.083789	0.14629	34.0699	-63.887	1468.8476	-1.6465	0.86914	-1.6367	-41.71	44.2737	76.0223	0.07666	-0.014648	-0.23389	-53.254	158.9917	478.02	-0.45479	0.3374	-0.53457	-53.924	160.602	1107.319	-1.2261	0.84619	-1.1245
1.776	-42.408	-150.906	1399.525	-1.3006	0.49244	-1.4666	-13.612	33.815	-0.402400000000001	0.10889	0.19336	-0.020996	-4.321	64.066	19.3201	0.12509	0.079297	0.13906	60.6809	-46.988	1476.8014	-1.6931	0.93189	-1.7029	-52.064	56.093	43.793	0.085938	-0.01123	-0.22412	-62.4308	152.1618	427.551	-0.43057	0.31045	-0.483	-61.454	156.456	1062.545	-1.2012	0.82624	-1.1012
1.778	-49.317	-156.639	1423.8251	-1.4111	0.53223	-1.498	-15.711	15.2437	22.283	0.091309	0.23242	-0.040039	-52.355	42.563	21.5634	0.12901	0.074218	0.13008	31.5046	-19.701	1468.078	-1.7397	0.99658	-1.7612	-88.7554	46.24746	37.318	0.091065	-0.0085449	-0.20776	-14.35	140.2719	415.465	-0.41074	0.28349	-0.44062	-36.8991	115.3127	1040.6709	-1.1685	0.80436	-1.0785
1.78	-68.4538	-82.7091	1472.01	-1.5171	0.57959	-1.5444	8.658	38.159	2.274	0.080322	0.26196	-0.059082	-8.224	35.04834	48.1729	0.13349	0.080566	0.11787	75.724	-71.5956	1503.8979	-1.7886	1.0669	-1.8257	-34.488	60.791	40.1501	0.092285	-0.015137	-0.19385	-39.249	195.33	385.579	-0.39355	0.25732	-0.39844	-63.0339	146.399	985.749	-1.1359	0.77725	-1.0508
1.782	-70.643	-44.668	1440.61411	-1.5425	0.6001	-1.5659	-29.268	36.40821	3.434	0.073242	0.29639	-0.075195	-11.981	38.899	24.835	0.13525	0.089355	0.10059	90.227	-47.5029	1518.2944	-1.8159	1.106	-1.8452	-55.581	46.279	18.5074	0.095703	-0.023438	-0.18018	-56.509	150.8423	378.079	-0.36767	0.22998	-0.34688	-42.594	93.633	928.591	-1.1017	0.75698	-1.0252
1.784	-46.7775	-86.286	1427.1046	-1.5435	0.62451	-1.6206	11.805	26.95917	33.335	0.078125	0.33594	-0.10645	-64.845	20.8319	34.8532	0.13652	0.096094	0.07832	68.011	-81.425	1522.5902	-1.8633	1.168	-1.877	-57.404	19.1931	29.551	0.098633	-0.030273	-0.17041	-2.326	137.552	371.7174	-0.34404	0.21338	-0.30225	-9.724	97.381	924.2461	-1.0718	0.73389	-1.0015
1.786	-21.999	-57.412	1414.216	-1.5339	0.62866	-1.6726	-23.801	57.703	-5.2826	0.082031	0.35791	-0.12158	-16.299	38.106	45.2694	0.13242	0.1045	0.059375	77.732	-102.858	1562.685	-1.8757	1.1946	-1.8826	-27.561	33.309	18.2621	0.10059	-0.036621	-0.15186	-50.3226	158.348	330.775	-0.31631	0.18799	-0.25811	-18.758	159.427	871.286	-1.0406	0.70959	-0.97889
1.788	-25.594	-70.478	1405.576	-1.5278	0.63721	-1.7358	-46.996	44.2534	0.9654	0.098145	0.39551	-0.15137	-39.179	46.047	12.796	0.1293	0.11309	0.036718	49.528	-56.61	1546.166	-1.8799	1.2109	-1.8789	-67.7869	20.2997	13.04	0.10034	-0.046142	-0.13403	-0.310000000000002	101.6333	359.826	-0.28623	0.16445	-0.2168	-11.22	134.533	887.916	-1.0072	0.68869	-0.9496
1.79	-1.163	-89.8862	1434.2861	-1.5215	0.64063	-1.8164	-0.423000000000002	44.935	2.3349	0.1062	0.42309	-0.17627	-26.786	31.5875	34.2601	0.12256	0.125	0.016602	17.9827	-59.081	1546.164	-1.8613	1.1914	-1.8438	-14.671	26.0908	48.1539	0.097656	-0.05127	-0.12256	-2.877	147.521	346.3641	-0.25342	0.14502	-0.18311	-18.325	194.199	871.4263	-0.97441	0.66446	-0.92306
1.792	-3.813	-33.642	1426.884	-1.5293	0.63086	-1.8457	-28.261	52.418	-11.5677	0.11328	0.44775	-0.20264	-8.604	49.617	22.0592	0.11279	0.14307	-0.0024414	33.943	-30.466	1550.7	-1.8491	1.1665	-1.8237	-33.494	50.036	25.65439	0.10156	-0.060059	-0.10938	-27.071	141.6518	318.1256	-0.22413	0.1249	-0.15762	-15.3609	200.358	805.0979	-0.93922	0.64371	-0.89468
1.794	12.9679	-59.9857	1427.0624	-1.5503	0.61865	-1.9019	-30.694	31.915	22.46289	0.12012	0.46973	-0.22803	-64.3672	32.7776	13.8961	0.10264	0.16309	-0.027637	12.55529	15.006	1524.5675	-1.7964	1.0981	-1.769	-55.036	30.1081	14.198	0.10156	-0.067383	-0.097656	17.859	101.3034	299.61464	-0.19512	0.10449	-0.12363	-0.405999999999999	171.145	775.1433	-0.90283	0.62451	-0.86279
1.796	41.6989	-48.7228	1462.8788	-1.5733	0.61303	-1.9345	-51.304	47.2378	23.0073	0.12109	0.4834	-0.24609	-19.529	15.7919	61.506	0.090332	0.18515	-0.05039	60.343	-11.1652	1508.057	-1.7456	1.0297	-1.7319	17.526	48.387	18.3015	0.10156	-0.075684	-0.085938	-4.26300000000001	138.606	257.467	-0.16816	0.081836	-0.090039	12.928	223.174	709.418	-0.86049	0.59934	-0.83186
1.798	59.642	-33.025	1456.6651	-1.5972	0.61377	-1.9487	-70.1621	48.2597	17.922	0.10596	0.46582	-0.28467	-45.186	14.4359	51.1152	0.085254	0.21289	-0.073438	58.717	26.2335	1477.8379	-1.6914	0.95898	-1.6914	-33.095	54.462	-6.9479	0.10547	-0.079101	-0.073731	-1.863	88.032	244.52377	-0.14443	0.060449	-0.060449	8.318	180.5261	689.7223	-0.81548	0.56907	-0.8012
1.8	58.7367	-94.635	1477.749	-1.6289	0.59961	-1.957	-13.793	36.1477	40.2047	0.059571	0.5188	-0.25928	-88.2911	-14.3635	68.3579	0.077051	0.23828	-0.10732	26.871	31.8379	1425.676	-1.605	0.87354	-1.6538	-22.07	36.10943	19.2212	0.10645	-0.084473	-0.064453	14.772	91.9328	236.6128	-0.12061	0.037598	-0.031738	7.05	187.3796	668.2936	-0.76626	0.54094	-0.77151
1.802	37.9837	-41.8993	1498.351	-1.6406	0.58398	-1.9551	-61.396	51.206	25.1639	0.0014648	0.479	-0.24951	-24.51	-2.6684	84.2567	0.074219	0.25635	-0.13818	27.165	23.558	1419.256	-1.5703	0.84375	-1.6406	17.58	37.038	15.68843	0.1084	-0.087891	-0.058105	-37.612	134.122	196.9935	-0.10215	0.019434	-0.0041992	21.338	206.176	603.485	-0.71721	0.51153	-0.7383
1.804	3.4632	-20.2263	1486.721	-1.6519	0.55713	-1.9468	-69.8499	24.0626	43.696	-0.044922	0.46924	-0.31982	-47.823	5.316	78.1626	0.070996	0.27763	-0.18154	17.9273	77.31428	1404.297	-1.4858	0.79736	-1.6245	-25.107	30.13296	12.4541	0.11133	-0.09082	-0.047852	-33.228	95.9162	185.3923	-0.08584	0.0079101	0.021582	9.54	143.958	584.4304	-0.66943	0.48096	-0.70459
1.806	11.6278	-11.811	1501.858	-1.6514	0.54639	-1.9326	-15.571	-3.126	63.01901	-0.077881	0.46363	-0.37646	-70.683	-11.5112	119.1922	0.058301	0.29463	-0.22236	17.7365	54.476	1385.682545	-1.414	0.77929	-1.6152	-5.353	34.519	36.0131	0.11035	-0.093262	-0.043457	-31.579	133.1	178.413	-0.068652	-0.0049804	0.043066	22.734	183.9776	566.37718	-0.6247	0.4499	-0.67392
1.808	29.3929	42.23948	1464.9858	-1.6401	0.53857	-1.9136	-77.539	10.9821	73.321	-0.12207	0.43994	-0.44092	-49.051	2.168	129.5635	0.033691	0.31455	-0.26026	16.8152	52.6331	1381.6603	-1.3452	0.77393	-1.6128	-16.917	41.2073	18.162	0.11792	-0.094727	-0.036865	-68.8711	127.373	161.61	-0.048731	-0.016309	0.062891	9.357	175.3031	517.191	-0.58339	0.42694	-0.63827
1.81	41.0029	-22.5313	1432.4766	-1.6108	0.52588	-1.8862	-59.4239	-3.229	130.7187	-0.20947	0.45361	-0.52295	-96.4599	-12.5042	157.595	-0.0037108	0.32129	-0.29863	-16.2721	88.968	1321.138	-1.2686	0.77344	-1.5859	-66.522	32.031	31.2123	0.12207	-0.093262	-0.028809	-39.32	91.364	178.1316	-0.023926	-0.022949	0.075684	2.987	150.734	513.0529	-0.54511	0.39257	-0.60937
1.812	47.2193	-11.6461	1435.0457	-1.5913	0.50928	-1.8647	-45.916	16.3085	182.157	-0.26709	0.45264	-0.57666	-67.382	2.799	277.2265	-0.053223	0.33496	-0.33203	-23.3099	55.809	1301.019	-1.2319	0.77393	-1.5815	-21.353	47.324	29.31	0.13135	-0.095215	-0.031738	-69.5759	149.12	162.699	-0.008203	-0.027832	0.090722	-34.998	210.453	475.649	-0.50918	0.36523	-0.57792
1.814	18.01407	29.9754	1381.847	-1.5405	0.46143	-1.8315	-112.417	22.5732	262.287	-0.3999	0.44385	-0.66846	-76.198	41.5614	368.013	-0.10996	0.34043	-0.36758	-41.8961	105.26	1309.292	-1.1772	0.77197	-1.5581	-44.934	57.795	18.8287	0.13672	-0.094238	-0.026855	-71.3834	100.7226	159.2378	0.01084	-0.030762	0.10039	-39.83	146.811	463.02434	-0.4707	0.34131	-0.54297
1.816	22.4903	8.044	1371.8974	-1.4956	0.41016	-1.7905	-51.156	25.521	372.377	-0.53809	0.42871	-0.73096	-84.753	27.598	477.205	-0.1708	0.34336	-0.41211	-67.712	93.805	1297.6973	-1.1394	0.75757	-1.5329	-44.852	40.4339	38.844	0.14648	-0.092773	-0.02002	-44.522	82.955	155.243	0.030762	-0.030762	0.11563	-37.826	144.3965	473.68	-0.42998	0.31934	-0.51641
1.818	4.7509	78.83209	1363.1537	-1.4746	0.38477	-1.7734	-34.322	57.191	467.088	-0.70313	0.43262	-0.79297	-38.349	50.063	601.424	-0.2415	0.34765	-0.46172	-22.174	34.1016	1307.483	-1.1089	0.75049	-1.5054	-15.375	31.9629	37.125	0.15966	-0.093017	-0.022705	-85.3335	110.2384	103.7844	0.049121	-0.028418	0.12666	-58.1731	164.4818	427.016	-0.38672	0.29941	-0.48282
1.82	0.358000000000001	58.1626	1311.2768	-1.4336	0.3584	-1.7461	-55.492	51.698	630.48475	-0.9834	0.46094	-0.86133	-64.321	66.9379	673.759	-0.3291	0.34649	-0.52285	-22.6501	62.40364	1254.4311	-1.0781	0.74609	-1.4766	-71.20439	19.402	8.903	0.17041	-0.091797	-0.018555	-50.918	36.956	84.0889	0.062988	-0.02832	0.13721	-53.038	122.484	396.97	-0.3418	0.2834	-0.45313
1.822	32.779	32.47	1298.273	-1.4118	0.35767	-1.7283	-19.455	48.213	801.31097	-1.1304	0.4917	-0.88818	-75.1852	71.9901	801.7001	-0.43066	0.34521	-0.58008	-30.4669	22.841	1219.9053	-1.0581	0.74365	-1.4585	-34.354	10.794	35.407	0.18359	-0.089844	-0.025391	-47.303	78.8952	79.5858	0.078125	-0.023926	0.13985	-53.714	169.2811	353.5683	-0.29307	0.26533	-0.42627
1.824	4.542	87.857	1266.124	-1.3862	0.35986	-1.7104	-52.4019	57.311	911.728	-1.4263	0.59619	-0.95264	-56.97	95.488	894.998055	-0.56338	0.34638	-0.64502	-4.154	67.115	1219.783114	-1.0249	0.73096	-1.4214	-44.084	35.1341	17.9846	0.18848	-0.089355	-0.025391	-83.7147	72.7681	73.0298	0.088281	-0.020703	0.14297	-64.9684	146.8087	318.0494	-0.24072	0.24609	-0.39746
1.826	-34.9555	62.5057	1249.676	-1.355	0.37451	-1.6714	-53.773	26.5542	1033.317	-1.6209	0.71704	-0.99294	-90.365	74.659	937.5939	-0.72373	0.35332	-0.7081	-9.471	143.417	1189.0153	-1.0025	0.71582	-1.3881	-70.1074	26.426	38.6281	0.19971	-0.094727	-0.026855	-67.1396	24.344	97.7092	0.093359	-0.0058594	0.14141	-68.16	113.479	314.0122	-0.19101	0.2291	-0.37959
1.828	-34.2279	90.578	1263.1378	-1.3379	0.38184	-1.6543	-31.865	30.84	1123.047	-1.7637	0.86621	-1.0273	-90.461	30.8803	989.316	-0.91553	0.37207	-0.75694	16.809	125.005	1170.7399	-0.98242	0.69629	-1.3535	-14.963	35.69031	54.582	0.20142	-0.099367	-0.025879	-75.4643	78.8364	56.96	0.1001	0.0014648	0.14424	-50.775	150.472	274.0791	-0.13545	0.2043	-0.3583
1.83	-62.673	110.096	1225.987	-1.2949	0.38867	-1.6152	-89.997	2.2056	1194.5314	-1.8394	1.0962	-1.0913	-82.473	11.801	981.3608	-1.1251	0.40927	-0.79443	16.966	160.8902	1134.3301	-0.96582	0.66602	-1.2979	-63.325	40.36	5.623	0.2041	-0.096191	-0.026855	-50.531	31.129	68.28884	0.10352	0.011719	0.15088	-59.1486	81.362	243.0285	-0.083496	0.18007	-0.34111
1.832	-68.7767	46.039	1216.40959	-1.2519	0.39063	-1.5787	-70.031	-31.8889	1278.704	-1.8179	1.2134	-1.1157	-116.2886	-42.02	981.677	-1.3398	0.46777	-0.83203	6.581	130.34422	1102.143	-0.9585	0.65088	-1.2749	-48.214	19.439	33.44355	0.19678	-0.098145	-0.024414	-30.612	42.4428	82.241	0.10185	0.025586	0.14404	-53.58	87.478	232.915	-0.034668	0.1582	-0.32227
1.834	-46.185	66.5769	1210.1988	-1.2144	0.38428	-1.5405	-72.605	-19.009	1260.773	-1.6714	1.4106	-1.1733	-49.22	-40.969	1009.54	-1.5441	0.54951	-0.87451	29.184	117.0318	1108.661	-0.94482	0.62939	-1.2261	-17.812	37.8662	22.965	0.19775	-0.09668	-0.029297	-35.282	87.447	57.3105	0.10351	0.040332	0.14932	-68.6085	115.1057	197.659	0.0068359	0.12598	-0.29736
1.836	-30.078	49.205	1148.861	-1.1758	0.36523	-1.4863	-65.218	-78.581	1247.128	-1.4722	1.4888	-1.2109	-86.3024	-22.77	995.657	-1.7023	0.65508	-0.91563	0.574999999999996	185.101	1072.6665	-0.93115	0.61132	-1.1914	-70.9353	24.8937	24.034	0.19385	-0.088379	-0.027344	-29.171	29.1213	62.043	0.10039	0.058692	0.15127	-86.1233	81.1572	179.701	0.038379	0.098438	-0.28516
1.838	-54.433	54.699	1142.6155	-1.1621	0.35645	-1.457	-46.6479	-114.312	1243.596	-1.2393	1.502	-1.2236	-77.6659	-31.377	1029.3334	-1.7895	0.79063	-0.95899	-17.134	165.8	1035.451	-0.90771	0.59619	-1.1577	-40.713	16.245	29.8336	0.19189	-0.082764	-0.036621	-23.771	77.448	43.3178	0.10381	0.071582	0.15235	-52.312	141.294	175.586	0.058984	0.071778	-0.27305
1.84	-54.7284	131.393	1107.608	-1.1357	0.33984	-1.4004	-57.6115	-132.897	1186.837	-0.92773	1.4277	-1.1719	-29.714	-8.787	1041.81	-1.778	0.95556	-0.98976	-17.905	169.559	1012.3855	-0.8833	0.58447	-1.1187	-33.421	27.6309	11.606	0.19873	-0.07666	-0.029785	-21.587	60.80425	30.58707	0.11328	0.088867	0.15479	-55.1354	124.644	156.933	0.078516	0.040918	-0.25118
1.842	-37.069	90.605	1094.3466	-1.1194	0.32886	-1.3548	-33.817	-165.158	1180.35	-0.80859	1.3555	-1.1191	-67.936	-52.156	1012.467	-1.709	1.1367	-1.0205	-20.849	184.165	935.139	-0.87012	0.57715	-1.1016	-50.765	17.6181	10.502	0.21143	-0.066406	-0.041016	7.548	-5.725	47.839	0.12275	0.1001	0.15576	-45.073	79.4541	173.317	0.081445	0.012695	-0.23203
1.844	-23.774	104.566	1096.9158	-1.0972	0.31934	-1.3101	4.083	-127.754	1160.323	-0.70898	1.1631	-1.0332	-33.176	-100.303	1062.901	-1.5772	1.2944	-1.0685	-23.299	118.23895	917.616	-0.82959	0.56494	-1.062	5.954	22.7343	36.11111	0.21973	-0.060302	-0.04834	-14.131	52.7638	22.9637	0.13906	0.10967	0.15595	-38.684	117.725	150.93194	0.080566	-0.02002	-0.21973
1.846	-10.089	118.838	1032.675	-1.0703	0.31641	-1.2598	-69.4717	-127.064	1157.657	-0.75146	1.019	-1.0005	-20.957	-81.695	1074.598	-1.3925	1.3751	-1.1249	-29.005	160.272	920.86594	-0.80346	0.55224	-1.0236	-27.077	41.546	12.41	0.22803	-0.056152	-0.055176	-9.722	17.738	9.546	0.15586	0.11279	0.15908	-32.229	68.7847	128.400969	0.081641	-0.04707	-0.2082
1.848	-35.584	72.716	1017.2027	-1.0444	0.3125	-1.2378	-23.788	-146.586	1188.575	-0.82617	0.91211	-0.96582	-74.9843	-95.482	1113.825	-1.1616	1.3559	-1.1597	-17.556	163.9808	886.6582	-0.77539	0.54102	-0.99023	-35.227	20.6604	19.8164	0.2334	-0.048828	-0.06543	2.225	11.5438	16.508	0.16806	0.11133	0.15401	-5.818	99.2002	118.7747	0.083398	-0.071289	-0.19551
1.85	-39.076	158.696	995.7973	-0.99414	0.31543	-1.1875	-12.062	-136.361	1168.087	-0.98047	0.83203	-0.94727	-51.602	-65.723	1150.5149	-0.93779	1.2679	-1.1511	-38.826	134.5546	881.113	-0.73926	0.52637	-0.94531	-3.081	32.864	15.293	0.23438	-0.046387	-0.069824	-26.672	60.843	2.401	0.18262	0.10791	0.15332	3.461	112.45766	76.487	0.079883	-0.084571	-0.19082
1.852	-57.42	174.884	954.17497	-0.95019	0.31909	-1.1514	-45.659	-171.499	1191.169	-1.0488	0.8125	-0.95117	-87.87314	-85.339	1121.306	-0.78223	1.1309	-1.1035	-41.505	176.7651	806.1341	-0.71484	0.52051	-0.91797	-49.435	26.2836	4.007	0.22803	-0.039551	-0.078125	-17.066	-10.56263	30.253	0.19228	0.093848	0.15049	-5.838	41.135	84.2412	0.080957	-0.094726	-0.19102
1.854	-59.789	171.936	935.059	-0.90283	0.32275	-1.1147	-22.728	-149.098	1269.5763	-1.1758	0.81445	-0.99023	-115.6853	-169.339	1119.124	-0.746	0.97335	-1.0587	-42.722	126.354	771.9691	-0.67188	0.49023	-0.86914	2.458	2.4874	35.339	0.21558	-0.033936	-0.087158	-17.687	23.5353	19.8705	0.19736	0.079297	0.14248	-2.73699999999999	66.5452	63.916	0.083984	-0.096191	-0.19043
1.856	-44.344	195.645	895.0148	-0.85107	0.32275	-1.0659	-88.2903	-144.63	1283.206	-1.239	0.85669	-1.0232	-51.031	-198.482	1124.986	-0.79453	0.82031	-1.0195	-45.372	140.808	772.1475	-0.63428	0.47583	-0.82959	-5.864	29.9628	10.867	0.19678	-0.026855	-0.098633	-29.048	26.9745	12.759195	0.19736	0.065625	0.14053	-5.671	51.5893	50.022	0.083887	-0.091894	-0.19219
1.858	-49.419	124.6148	864.1293	-0.82959	0.32373	-1.0327	-96.5453	-202.883	1304.757	-1.2905	0.91064	-1.0776	-71.606	-229.9624	1142.368	-0.88086	0.69649	-0.9957	-72.189	188.369	732.98394	-0.60156	0.45703	-0.79297	-35.193	18.935	12.3614	0.16943	-0.018066	-0.10791	-25.555	-7.7827	38.7361	0.19629	0.050684	0.13193	-31.331	39.3238	74.7129	0.084571	-0.090625	-0.19863
1.86	-31.582	133.422	845.9825	-0.79248	0.32373	-0.97314	-48.05	-221.223	1300.547	-1.3608	0.98877	-1.1479	-63.109	-249.683	1213.0745	-0.96816	0.61192	-0.99238	-81.722	165.9428	720.979	-0.56006	0.42725	-0.73584	-4.02699999999999	34.471	23.6946	0.15381	-0.017578	-0.11279	-31.371	62.8614	28.295	0.18994	0.039063	0.12988	-2.473	101.576	62.3593	0.084179	-0.080078	-0.19082
1.862	-39.226	170.4866	799.567	-0.76587	0.31933	-0.93725	-70.96506	-319.306	1301.108	-1.3999	1.0278	-1.189	-57.67	-226.791	1230.859	-1.0391	0.56152	-1.0078	-80.50011	217.057	685.3868	-0.53906	0.41846	-0.70898	-43.14	61.791	5.379	0.1167	-0.0024414	-0.13623	-46.913	39.176	29.9687	0.17784	0.031152	0.13076	-41.686	46.9095	49.8898	0.08252	-0.06582	-0.19082
1.864	-66.812	134.745	793.7231	-0.74854	0.31543	-0.88428	-9.917	-371.632	1347.051	-1.4839	1.0747	-1.2495	-39.326	-276.128	1247.2384	-1.1093	0.55605	-1.0603	-87.4055	205.913	636.946	-0.5083	0.38574	-0.65332	-39.226	28.6406	23.864	0.092285	0.005127	-0.14429	-27.236	23.1977	20.3088	0.16221	0.028028	0.12803	-40.384	55.255	45.88387	0.087402	-0.05127	-0.19189
1.866	-47.413	177.411	755.19282	-0.71631	0.2998	-0.82422	-5.352	-342.103	1354.5739	-1.5525	1.0935	-1.2839	39.257	-266.42	1289.56022	-1.1739	0.5876	-1.1284	-73.3158	170.479	614.1225	-0.48706	0.35986	-0.61523	-13.45	39.764	9.957	0.0625	0.01416	-0.16211	-59.7119	73.1038	-11.363	0.14776	0.033496	0.1292	-47.928	86.416	12.432	0.091016	-0.032715	-0.18857
1.868	-57.477	155.0685	701.0451	-0.69678	0.29785	-0.79443	-39.213	-361.697	1373.23	-1.6167	1.1099	-1.312	21.273	-227.53	1326.61	-1.238	0.64385	-1.194	-56.641	202.358	577.525	-0.47119	0.33252	-0.57178	-52.317	29.0711	11.4405	0.03418	0.022461	-0.18066	-57.9407	13.8724	0.919999999999998	0.13115	0.041601	0.13164	-44.139	30.6151	33.8096	0.097364	-0.01875	-0.18398
1.87	-56.619	133.8059	692.61118	-0.66357	0.2876	-0.73779	19.069	-322.549	1402.121	-1.6992	1.1484	-1.3447	-21.105	-220.95	1411.698	-1.3171	0.70869	-1.2585	-67.565	153.5873	541.86	-0.44824	0.30176	-0.52148	-19.972	19.8558	36.1832	0.0087891	0.026367	-0.19092	-50.169	60.339	15.9964	0.11914	0.062012	0.13574	-31.444	67.5159	52.0829	0.10361	-3.7991e-08	-0.18008
1.872	-53.858	182.788	667.468	-0.63721	0.27881	-0.68848	35.659	-302.23	1434.446	-1.7363	1.1719	-1.3594	-19.953	-155.5257	1446.616	-1.418	0.77441	-1.3105	-60.97	168.624	554.1878	-0.43066	0.2788	-0.4856	-33.2725	32.6277	33.974	-0.034668	0.032227	-0.21338	-96.1	69.69	5.71	0.11211	0.079199	0.14219	-57.155	55.4413	35.1962	0.11562	0.012988	-0.1794
1.874	-92.26755	159.3414	661.5139	-0.61084	0.26709	-0.63818	19.56	-321.782	1515.025	-1.8086	1.2207	-1.3906	-80.25544	-139.007	1459.926	-1.5231	0.83623	-1.3493	-74.6156	181.9397	488.094	-0.4126	0.25586	-0.44922	-70.2513	4.09775	59.7635	-0.081789	0.028076	-0.22486	-64.239	14.7989	10.1439	0.10723	0.09961	0.14561	-76.4141	26.908	29.0869	0.12793	0.02002	-0.17871
1.876	-77.7236	184.542	650.973	-0.57813	0.26123	-0.57813	26.648	-246.924	1566.765	-1.8659	1.26	-1.4139	-81.0466	-147.265	1513.547	-1.6296	0.88389	-1.3721	-59.179	134.8	468.831	-0.37744	0.22607	-0.39111	-13.056	-6.8123	85.25966	-0.15039	0.022949	-0.23486	-68.027	66.283	11.59	0.10567	0.11562	0.14756	-40.111	86.25	13.586	0.13779	0.025293	-0.17275
1.878	-77.15221	197.793	593.5688	-0.55615	0.25049	-0.54248	-37.875	-222.8338	1590.3112	-1.9136	1.313	-1.4351	-24.869	-107.922	1512.8215	-1.7249	0.9206	-1.3987	-38.023	184.353	462.3739	-0.36035	0.21289	-0.37207	-56.2269	7.5775	75.459	-0.26074	0.0087891	-0.25293	-65.4405	40.7266	23.733	0.11045	0.12959	0.1582	-65.3468	32.2144	5.25	0.15107	0.030566	-0.16533
1.88	-93.6641	132.042	578.1959	-0.51318	0.23975	-0.47803	-52.32	-176.312	1651.308	-1.9683	1.3892	-1.4683	-70.284	-150.471	1508.144	-1.7934	0.95078	-1.4145	-46.023	168.3586	431.0813	-0.31592	0.19092	-0.32813	-35.546	-6.15899	137.9426	-0.32617	-0.0039063	-0.26807	-47.926	20.6947	47.88686	0.11377	0.13916	0.15967	-66.968	32.234	33.1894	0.15967	0.03252	-0.15947
1.882	-61.362	163.7597	558.0371	-0.47827	0.23218	-0.4353	-36.735	-69.57	1634.4173	-1.9883	1.4297	-1.4746	-68.422	-134.831	1521.502	-1.8452	0.979	-1.439	-24.06	145.0131	437.8977	-0.28613	0.17065	-0.30176	-5.021	4.933	189.0031	-0.45654	-0.035645	-0.31006	-67.5686	88.601	13.315	0.12237	0.14571	0.16817	-59.7548	52.9	22.199	0.17031	0.032226	-0.15225
1.884	-57.329	154.5294	504.7202	-0.43408	0.22314	-0.38477	-67.098	-71.638	1609.4281	-2.0112	1.4907	-1.4858	-80.966	-100.045	1513.311	-1.8848	1.0031	-1.4606	-23.138	175.841	408.4096	-0.25293	0.15674	-0.26758	-42.843	19.1158	253.332	-0.58227	-0.062256	-0.34448	-38.991	31.5636	20.8356	0.12529	0.14043	0.1709	-72.6638	2.92595	26.4636	0.17529	0.035156	-0.146
1.886	-65.587	158.4197	498.4767	-0.37402	0.21436	-0.32959	-29.755	-76.941	1611.385	-2.0164	1.5286	-1.4929	-90.8655	-133.4397	1535.7303	-1.9162	1.0391	-1.4777	-45.54215	113.7652	396.9328	-0.20898	0.12891	-0.23047	23.0923	22.9359	407.218	-0.74023	-0.093262	-0.37891	-37.277	59.363	30.8647	0.13037	0.13496	0.17402	-53.8805	38.2785	44.6461	0.19004	0.02959	-0.13144
1.888	-78.8477	201.112	467.56	-0.34082	0.20605	-0.30273	-60.577	-103.924	1596.085	-2.0132	1.5454	-1.4927	-17.394	-98.309	1565.3905	-1.9471	1.0754	-1.4992	-13.488	123.5755	399.035	-0.18945	0.1167	-0.21045	6.44507	70.065	527.519	-1.0269	-0.13232	-0.4292	-41.843	60.406	20.4612	0.13457	0.12539	0.17578	-77.8603	27.393	31.204	0.2003	0.020996	-0.12031
1.89	-79.8815	150.9527	442.192	-0.27588	0.1875	-0.25586	-89.4838	-159.5696	1657.9697	-2.002	1.5566	-1.4805	-41.505	-120.295	1568.5225	-1.9707	1.1058	-1.5129	3.23099999999999	130.6923	359.0713	-0.16211	0.083984	-0.16699	-26.4824	54.825	666.903	-1.2012	-0.146	-0.45898	-15.942	-3.3246	37.2876	0.13818	0.11768	0.18115	-78.644	12.459	41.4094	0.20967	0.019043	-0.11093
1.892	-42.923	144.896	432.5318	-0.2312	0.17017	-0.21704	-29.123	-108.4951	1688.8283	-1.9839	1.5474	-1.4741	-38.561	-148.81	1613.7704	-1.9819	1.1313	-1.5229	-11.955	86.007	329.98	-0.14184	0.068848	-0.1333	46.5281	49.0892	806.512	-1.6011	-0.14258	-0.51953	-23.174	54.96	27.7282	0.14102	0.11123	0.18731	-30.555	80.147	11.409	0.22246	0.014355	-0.10323
1.894	-44.132	144.617	395.784	-0.19141	0.14795	-0.18164	-43.6177	-147.779	1690.6056	-1.937	1.5337	-1.4546	-19.962	-84.132	1624.4613	-1.9881	1.1473	-1.5249	12.981	142.006	289.9042	-0.12061	0.049805	-0.10205	11.477	76.685	898.982	-1.9151	-0.10498	-0.5791	-19.872	32.0929	39.6088	0.146	0.10508	0.19082	-41.556	49.4706	10.543	0.23486	0.0078125	-0.09375
1.896	-52.447	118.916	398.941	-0.15137	0.12109	-0.13965	-19.667	-169.729	1745.822	-1.8926	1.5229	-1.4355	-111.61	-93.092	1631.188	-1.9875	1.1539	-1.5207	-10.438	126.621	251.901	-0.1001	0.026855	-0.07373	15.0972	50.723	1051.292	-2.2031	-0.029297	-0.64063	-3.153	22.8986	56.7637	0.14834	0.099999	0.19199	-35.028	53.2807	60.769	0.24004	0.0022461	-0.086816
1.898	-32.189	170.856	384.5188	-0.12744	0.10986	-0.11279	-24.812	-146.272	1730.8458	-1.8491	1.5063	-1.4116	-74.487	-58.559	1667.004	-1.9828	1.1571	-1.5137	-20.526	107.7244	271.0179	-0.090332	0.013672	-0.050781	89.867	65.964	1130.2022	-2.5054	0.14844	-0.75684	-23.44	85.381	38.3683	0.15518	0.10195	0.19385	-19.606	64.865	39.4415	0.25049	-0.0040039	-0.07666
1.9	-48.59	153.572	361.7904	-0.096191	0.083008	-0.077148	-89.872	-183.378	1723.753	-1.7813	1.4941	-1.4023	-78.666	-47.871	1619.914	-1.9644	1.1457	-1.5004	-8.641	140.853	250.7565	-0.062012	0.0014648	-0.025879	14.0229	33.3456	1161.013	-2.5947	0.27832	-0.82227	-16.679	17.9628	28.3357	0.15186	0.10547	0.18604	-25.062	6.2392	34.547	0.26104	-0.016113	-0.071582
1.902	-38.511	137.902	354.301	-0.070068	0.063965	-0.047607	-81.171	-120.12	1749.11	-1.7456	1.4888	-1.3921	-117.44558	-96.7037	1608.181	-1.9453	1.125	-1.4805	-31.552	75.4426	231.2889	-0.044433	-0.0048828	-0.0031736	52.198	-34.155	1190.687	-2.6602	0.66406	-0.93164	10.815	46.209	39.0645	0.1459	0.11162	0.17666	-0.360999999999997	47.6787	34.1824	0.26846	-0.027637	-0.068652
1.904	-15.914	145.293	322.0698	-0.04541	0.044922	-0.018066	-103.728	-79.992	1724.056	-1.6641	1.4844	-1.3828	-60.359	-42.363	1601.8968	-1.9321	1.0971	-1.4626	-38.698	89.5182	219.6506	-0.023926	-0.013672	0.016602	54.301	-45.3091	1175.863	-2.6804	0.99731	-1.0583	-22.77	52.874	28.2295	0.13975	0.121	0.16328	-13.538	44.3469	15.2195	0.27246	-0.037598	-0.060547
1.906	-27.204	97.7537	324.7222	-0.015137	0.032227	0.010254	-106.12	-98.536	1709.691	-1.5933	1.4781	-1.3697	-90.399	-34.705	1563.365	-1.9171	1.0689	-1.4394	-34.236	114.323	180.433	-0.0039063	-0.018555	0.042969	-4.994	-81.682	1175.401	-2.6333	1.231	-1.1968	-5.003	-3.13809	54.839	0.13076	0.1335	0.15156	-24.59	7.775	41.6829	0.26953	-0.048145	-0.057031
1.908	-11.921	103.912	320.06685	0.0019531	0.027344	0.020508	-55.8097	-50.8	1681.5568	-1.5234	1.4727	-1.3613	-97.3387	-26.6225	1575.011	-1.9011	1.0411	-1.4186	-52.325	92.3872	185.4549	0.0092773	-0.023438	0.054688	31.039	-89.966	1186.295	-2.2227	1.2725	-1.2813	-19.102	59.003	33.50596	0.11699	0.15674	0.13067	-11.942	56.032	28.066	0.26738	-0.058496	-0.053614
1.91	-4.863	107.1743	285.755	0.027832	0.016602	0.043457	-98.1716	-89.0638	1615.27	-1.4277	1.4453	-1.3359	-75.583	11.152	1530.861	-1.8897	1.0181	-1.3977	-55.502	145.293	173.012	0.026855	-0.021484	0.063477	9.333	-63.9577	1157.773	-1.8687	1.1978	-1.2466	-30.266	21.0564	24.58099	0.10449	0.18164	0.11182	-21.39	9.8765	16.8573	0.25528	-0.070215	-0.045801
1.912	-53.132	64.431	264.8827	0.053711	0.015869	0.058106	-64.442	-87.565	1591.496	-1.4087	1.4292	-1.3042	-81.369	-39.113	1495.899	-1.8804	0.99463	-1.3784	-46.013	113.928	148.1163	0.037842	-0.018067	0.078858	25.503	-77.4461	1181.9729	-1.1851	0.95166	-1.1323	-8.61199999999999	2.9945	41.7178	0.087012	0.21094	0.093067	-10.875	21.945	51.026	0.24072	-0.077832	-0.041797
1.914	-24.344	92.4782	232.97624	0.07373	0.013672	0.077637	-47.48	-39.6953	1549.319	-1.3823	1.3892	-1.2319	-36.614	-22.5931	1507.652	-1.877	0.98047	-1.3637	-53.162	66.35295	156.0879	0.047852	-0.019531	0.085938	55.8414	-47.1607	1184.38	-0.85889	0.69702	-1.064	-36.512	45.4958	30.061	0.069531	0.2456	0.073633	0.238	40.464	45.3186	0.22852	-0.087402	-0.041504
1.916	-25.472	79.7052	202.8095	0.10107	0.01123	0.090332	-84.635	-44.909	1499.9953	-1.3238	1.335	-1.2364	-46.417	22.1157	1480.676	-1.8655	0.97842	-1.3476	-40.667	95.884	137.5905	0.062012	-0.017578	0.095215	8.356	-64.215	1177.849	-0.69629	0.46191	-1.0332	-34.312	-23.5859	49.4327	0.05625	0.28193	0.051368	-34.516	-11.0321	41.972	0.21299	-0.086231	-0.039649
1.918	-29.665	72.941	204.8648	0.11182	0.013672	0.097168	-18.311	0.111400000000001	1502.1289	-1.2598	1.2949	-1.207	-65.435	17.8674	1467.6861	-1.8499	0.98623	-1.3366	-73.6941	40.888	114.5773	0.067871	-0.016602	0.094727	25.865	-92.5647	1222.226	-0.66846	0.28174	-1.0405	-50.211	2.7489	74.6417	0.03711	0.31201	0.031738	-18.361	28.9788	34.0015	0.20469	-0.082031	-0.041016
1.92	-19.451	113.743	180.345	0.11963	0.013184	0.10547	-1.367	4.623	1445.54	-1.207	1.2813	-1.2109	-34.096	64.747	1467.5992	-1.819	1.003	-1.324	-66.922	62.212	112.74334	0.072266	-0.012207	0.10352	-6.22799999999999	-38.422	1230.6297	-0.67822	0.2373	-1.0483	-69.1701	16.1954	93.2871	0.014648	0.34033	0.0029297	-23.249	29.6719	2.468	0.19609	-0.071094	-0.042578
1.922	-50.773	79.9172	169.751	0.12989	0.014405	0.11133	-29.1	-34.1188	1436.637	-1.1787	1.2891	-1.1953	-88.035	55.879	1445.275	-1.7827	1.0161	-1.3101	-58.247	88.8248	71.084	0.072021	-0.0019531	0.10401	-58.982	-24.949	1276.019	-0.71826	0.18994	-1.0474	-72.036	-44.025	149.8191	-0.0069338	0.36152	-0.029199	-42.277	3.497	36.4379	0.19443	-0.058984	-0.043848
1.924	-28.297	96.43176	183.9405	0.12939	0.014648	0.11426	-2.512	4.651	1433.309	-1.1128	1.2837	-1.1675	-70.082	25.87509	1454.9672	-1.7519	1.0261	-1.2926	-78.882	37.389	81.1576	0.068359	0.0039063	0.10645	-22.553	2.42100000000001	1292.8273	-0.74561	0.18115	-1.0596	-82.808	20.834	200.656	-0.03291	0.38438	-0.067676	-22.539	55.0128	44.1753	0.19727	-0.045898	-0.052246
1.926	-33.772	105.5187	162.6908	0.12402	0.014648	0.12549	-41.576	-32.3038	1413.3171	-1.0718	1.2446	-1.1391	-39.681	43.928	1439.683	-1.7262	1.0309	-1.2715	-53.653	91.0017	79.7442	0.069824	0.02002	0.11182	-56.9687	-16.179	1221.643	-0.76563	0.17725	-1.0918	-119.0684	-5.2784	261.429	-0.06416	0.40977	-0.11143	-51.345	16.5753	16.7316	0.20352	-0.033594	-0.050977
1.928	-64.831	67.46	157.639	0.12402	0.018555	0.13232	-44.8219	-31.7235	1415.197	-1.0469	1.2031	-1.1074	-68.796	18.183	1403.0122	-1.6976	1.0281	-1.2469	-51.9171	64.5719	60.8369	0.069336	0.032227	0.11523	-63.727	-142.042	1214.397	-0.77002	0.19141	-1.1265	-104.767	-0.0809999999999995	348.478	-0.10937	0.42695	-0.16182	-60.171	28.3564	21.9418	0.21523	-0.022461	-0.054981
1.93	-19.278	92.822	120.9322	0.11328	0.018555	0.13916	-32.292	0.286000000000001	1395.0724	-1.0215	1.1563	-1.0703	-31.167	45.782	1400.1129	-1.6789	1.0156	-1.2196	-45.887	57.0281	78.275	0.078125	0.045898	0.11768	-36.22	-197.722	1208.848	-0.77051	0.20654	-1.1348	-79.224	83.3569	457.191	-0.15381	0.44141	-0.2124	-65.1997	55.242	8.107	0.21641	-0.014258	-0.056934
1.932	-59.321	80.887	61.393	0.11206	0.025391	0.1438	-77.4762	-32.062	1363.9167	-1.0117	1.125	-1.0547	-58.632	71.549	1365.164	-1.6504	0.99414	-1.1934	-27.271	111.095	63.5834	0.091797	0.062256	0.11743	-77.802	-237.526	1230.163	-0.76172	0.23291	-1.1504	-92.3044	50.672	601.195	-0.21133	0.44199	-0.26504	-84.03722	7.3297	19.1259	0.22637	-0.010059	-0.052539
1.934	-74.9415	71.3574	74.566	0.11426	0.033691	0.14941	4.255	-10.861	1341.8932	-0.98389	1.0767	-1.019	-91.9422	34.577	1354.6267	-1.6155	0.97197	-1.1663	-54.596	69.206	51.5757	0.10303	0.070313	0.12158	-65.173	-251.765	1272.7564	-0.79248	0.24438	-1.1618	-78.695	86.03919	725.553	-0.28525	0.44326	-0.33701	-69.635	37.8789	30.63	0.229	-0.0083008	-0.052734
1.936	-52.237	96.4	68.15	0.11914	0.045898	0.15625	-0.350999999999999	-0.547800000000001	1278.3311	-0.95971	1.0422	-0.99534	-44.202	64.347	1340.8125	-1.5789	0.95137	-1.142	-30.143	81.903	59.2214	0.125	0.088379	0.12158	-9.724	-226.574	1247.2568	-0.85547	0.24707	-1.1816	-115.61039	99.9114	812.405	-0.37315	0.42959	-0.40381	-59.3656	41.6568	-1.684	0.23154	-0.015332	-0.053418
1.938	-71.4655	50.3925	70.27	0.12549	0.051758	0.15332	-41.528	-21.659	1228.7932	-0.91943	1.0122	-0.97119	-54.861	66.995	1299.479	-1.541	0.92676	-1.1127	-14.026	85.771	24.834	0.13721	0.087891	0.12305	-52.91123	-272.719	1235.665	-0.98633	0.2417	-1.2305	-90.543	41.9783	909.9265	-0.4833	0.41826	-0.47822	-80.4624	0.991	11.6743	0.2294	-0.020898	-0.049414
1.94	-54.281	52.111	81.217	0.14307	0.0625	0.15967	-4.279	24.74	1222.9603	-0.87109	0.9707	-0.94775	-50.701	72.772	1298.2437	-1.4973	0.89883	-1.0938	-25.581	22.674	28.09735	0.16553	0.084961	0.125	13.349	-267.283	1272.513	-1.0581	0.24316	-1.2612	-109.68	96.537	981.5376	-0.6167	0.41064	-0.54834	-48.035	54.8253	18.301	0.2251	-0.03457	-0.041602
1.942	-50.136	57.81	52.012	0.15991	0.064941	0.15479	-48.377	24.997	1189.255	-0.85107	0.95166	-0.93311	-18.195	131.45	1282.0792	-1.459	0.87305	-1.0723	-14.702	60.1815	45.2584	0.1753	0.08081	0.12402	46.5624	-209.021	1310.481	-1.1548	0.25439	-1.3257	-134.652	44.606	1036.336	-0.77637	0.40566	-0.60957	-63.0859	25.2359	9.7033	0.21982	-0.042187	-0.039941
1.944	-73.4995	37.5929	72.3329	0.16797	0.064453	0.15674	-11.848	39.118	1200.185	-0.81836	0.90625	-0.90527	-69.5192	128.002	1257.64726	-1.4261	0.85557	-1.0534	-2.214	45.3525	32.325	0.18799	0.075684	0.12207	10.008	-186.956	1380.876	-1.1953	0.27221	-1.3794	-104.472	-2.789	1063.609	-0.95118	0.41308	-0.66367	-42.349	38.2043	19.2187	0.21436	-0.052734	-0.03418
1.946	-22.546	88.543	72.676	0.18018	0.055664	0.15479	-2.976	103.546	1168.4988	-0.7959	0.86914	-0.875	-49.339	152.345	1237.472	-1.4012	0.83438	-1.0356	-30.973	26.0402	45.034	0.19678	0.058594	0.11963	26.298	-103.754	1413.752	-1.2124	0.28369	-1.4331	-106.931	-2.85	1025.511	-1.1348	0.4334	-0.7043	-35.476	70.423	7.698	0.20898	-0.057715	-0.034473
1.948	-50.093	81.856	41.2409	0.18115	0.055176	0.15332	-44.962	118.686	1124.6596	-0.78125	0.84766	-0.8584	-57.565	169.793	1196.612	-1.3683	0.82031	-1.0152	-18.184	68.138	18.4369	0.2002	0.04541	0.11377	-13.0038	-84.009	1358.669	-1.2363	0.28809	-1.5078	-102.1243	-89.133	1009.555	-1.3157	0.4835	-0.7372	-58.728	21.9427	17.812	0.20264	-0.065332	-0.037109
1.95	-59.129	53.6147	48.09	0.17578	0.041992	0.15234	-46.623	162.77	1091.9349	-0.76416	0.80664	-0.83203	-69.1268	129.583	1174.267	-1.342	0.80215	-0.9994	-5.88	18.5598	6.626	0.19727	0.023926	0.10889	20.332	-101.644	1354.8417	-1.252	0.28418	-1.5449	-87.2101	-70.963	1024.114	-1.48	0.55518	-0.76318	-8.169	40.84599	51.7979	0.2003	-0.066113	-0.039844
1.952	-24.219	68.891	32.7635	0.16944	0.033936	0.14526	-90.038	196.166	1051.714	-0.75073	0.77514	-0.80883	-13.212	158.291	1158.3438	-1.3101	0.7915	-0.98193	-3.428	34.0792	35.0838	0.18823	0.0095214	0.10401	60.346	-53.131	1340.28	-1.3081	0.30615	-1.6304	-87.0481	-43.8992	1016.0532	-1.6199	0.66494	-0.77334	-29.993	30.8804	20.796	0.204	-0.068164	-0.045312
1.954	-45.676	21.1864	30.6363	0.16016	0.026367	0.14258	-99.718	162.357	1036.14405	-0.73389	0.75049	-0.78369	-66.1361	164.749	1098.813	-1.2745	0.77607	-0.96416	-6.882	49.0477	28.836	0.17725	0.0029297	0.099609	35.1512	-91.26	1341.764	-1.3718	0.34326	-1.6912	-50.299	-74.6026	1043.9974	-1.7175	0.81455	-0.77393	-48.507	8.5054	28.781	0.20508	-0.073242	-0.049805
1.956	-21.27	42.72	48.6143	0.14697	0.014648	0.13184	-17.051	166.87	1023.6787	-0.70264	0.70557	-0.771	-53.8472	144.502	1073.253	-1.2359	0.76172	-0.94843	-38.288	-3.348	37.0289	0.15869	0.0053711	0.09375	83.258	-97.456	1402.2294	-1.4585	0.39307	-1.7612	-51.805	-33.77147	1047.006	-1.7597	1.0005	-0.76455	-5.116	62.989	16.7457	0.20469	-0.075391	-0.057617
1.958	-12.639	55.6432	11.868	0.13746	0.014892	0.12524	-39.0535	139.401	972.206	-0.68506	0.68994	-0.75146	3.572	166.3961	1048.1465	-1.2062	0.74453	-0.93281	-13.36	40.0249	40.9172	0.15186	0.011719	0.097656	76.706	-78.195	1372.012	-1.5625	0.47656	-1.8535	-60.774	-102.517	1049.132	-1.7356	1.1815	-0.77666	-43.869	39.894	7.484	0.20518	-0.083789	-0.069043
1.96	-50.357	35.1213	15.1723	0.13086	0.022461	0.12256	-11.365	115.68	954.5133	-0.64697	0.65576	-0.72705	-49.3716	132.699	1012.0182	-1.1709	0.72403	-0.91074	-40.953	35.1152	20.3305	0.13477	0.024902	0.098633	63.487	-125.134	1414.2404	-1.6069	0.52295	-1.8901	-13.592	-145.5012	1094.722	-1.6602	1.3301	-0.80762	-5.891	53.9	39.3816	0.20283	-0.07832	-0.069433
1.962	-4.929	64.251	25.1553	0.125	0.035156	0.10742	-5.632	153.8999	905.773	-0.62158	0.63282	-0.71094	2.267	141.778	986.24	-1.1382	0.70361	-0.89307	-53.586	28.7648	45.33	0.12622	0.042481	0.097412	134.113	-94.5102	1458.2054	-1.6636	0.60986	-1.9585	-42.893	-99.55	1128.576	-1.5245	1.4227	-0.84873	-0.232999999999997	76.213	-0.744000000000003	0.19707	-0.079394	-0.078809
1.964	-30.432	50.51	-0.79343	0.12305	0.041016	0.10547	-69.1854	153.942	853.029	-0.58984	0.60938	-0.69824	-11.453	170.241	927.186	-1.1125	0.68438	-0.8709	-26.405	73.03	20.224	0.12354	0.063965	0.10107	103.195	-117.937	1440.5242	-1.6794	0.66113	-1.9958	-63.056	-112.477	1169.259	-1.3703	1.4519	-0.88476	-33.504	25.77	28.99114	0.18604	-0.082031	-0.089355
1.966	-19.467	41.6353	23.3987	0.12598	0.062012	0.094727	-3.416	150.465	827.834	-0.5415	0.57178	-0.66846	-42.72	148.552	918.1198	-1.0789	0.66465	-0.85371	-58.2846	33.79209	-6.271	0.12305	0.09375	0.10986	90.838	-138.429	1486.135	-1.6733	0.6958	-2.0249	-84.533	-77.53	1183.5119	-1.2406	1.4207	-0.89102	7.716	53.0745	63.8898	0.18105	-0.07959	-0.10029
1.968	12.982	61.067	17.7296	0.12818	0.076416	0.09375	-8.63	151.443	815.0846	-0.521	0.55322	-0.65186	-4.15	180.566	916.3862	-1.0371	0.64473	-0.82988	-50.8	39.7771	26.676	0.125	0.10742	0.1123	98.495	-74.8331	1478.62	-1.6406	0.70898	-2.0332	-122.5741	-113.126	1168.121	-1.1827	1.3136	-0.86123	-0.0390000000000015	46.2752	47.34838	0.16992	-0.076758	-0.11455
1.97	-39.158	23.9651	25.4398	0.13428	0.092285	0.092285	-8.825	112.235	820.625	-0.47266	0.52051	-0.62891	-48.451	180.79	880.4735	-0.99348	0.62314	-0.80986	-61.2805	49.503	24.444	0.12793	0.12793	0.11963	19.0936	-103.141	1490.389	-1.6113	0.70215	-2.0332	-87.991	-230.666	1156.316	-1.1948	1.1597	-0.80615	-29.702	16.925	54.18	0.15703	-0.073633	-0.12744
1.972	-23.36	41.211	57.6677	0.14014	0.10596	0.086426	37.752	143.0708	792.8192	-0.43359	0.48877	-0.61669	-22.25	154.2919	848.777	-0.94922	0.59766	-0.78564	-79.8979	-3.132	24.21723	0.13208	0.13648	0.12988	43.9336	-72.2294	1532.295	-1.5508	0.66406	-2.0195	-87.448	-274.5669	1180.225	-1.2639	0.98613	-0.74961	-20.883	58.808	37.18176	0.14483	-0.063477	-0.14482
1.974	-18.891	47.8339	27.514	0.146	0.1084	0.088867	-27.2154	166.363	742.841	-0.39746	0.46094	-0.5957	8.18	180.75	799.015	-0.90507	0.5748	-0.76055	-40.473	31.71967	35.3371	0.13623	0.14258	0.13623	27.0269	-49.78	1495.156	-1.5097	0.63086	-1.9971	-83.063	-320.155	1236.3648	-1.3637	0.83945	-0.69844	-47.17	44.663	6.6357	0.13574	-0.056641	-0.16064
1.976	-29.062	21.633	21.3619	0.15723	0.11182	0.090332	-3.836	166.304	715.0229	-0.35449	0.41992	-0.58105	-54.5998	168.9456	749.001	-0.86064	0.54639	-0.73506	-54.838	34.1118	16.914	0.14209	0.1377	0.146	23.65699	-75.922	1466.356	-1.4766	0.59766	-1.9766	-54.833	-332.719	1295.694	-1.4688	0.72891	-0.67539	-32.716	41.7731	37.4504	0.12236	-0.046679	-0.18271
1.978	-8.768	41.9952	31.6824	0.1648	0.10962	0.092774	-5.347	200.557	691.4747	-0.33203	0.40137	-0.56934	-3.415	172.1916	733.659	-0.81884	0.5249	-0.70576	-68.8999	18.2726	28.0321	0.146	0.13623	0.1499	57.984	-12.705	1419.6111	-1.4526	0.56299	-1.9448	-60.139	-289.078	1303.8401	-1.5516	0.66787	-0.67822	-27.478	57.773	30.61992	0.11162	-0.032813	-0.2043
1.98	-43.77	28.4541	14.2027	0.1665	0.10205	0.097656	-19.218	177.491	636.2868	-0.2915	0.36426	-0.54541	-13.866	188.955	695.06	-0.7749	0.49248	-0.67959	-45.595	53.931	34.6467	0.14453	0.12988	0.15527	15.45	-0.1374	1357.813	-1.4473	0.55273	-1.9336	-41.589	-321.73	1300.4294	-1.6094	0.64453	-0.71094	-84.7823	1.7501	24.4774	0.096776	-0.016016	-0.22734
1.982	-37.568	19.7175	34.28	0.16162	0.094727	0.10156	33.95	140.5863	601.0174	-0.26538	0.33935	-0.53442	-43.187	157.104	652.32395	-0.73486	0.45947	-0.65088	-72.0703	14.7021	18.9646	0.14404	0.12524	0.16284	2.8871	-1.654	1350.598	-1.4487	0.53564	-1.9116	-6.098	-285.488	1338.598	-1.6347	0.66367	-0.77588	-53.5831	28.2751	49.2417	0.08125	0.004004	-0.24756
1.984	-16.941	48.655	25.3361	0.1582	0.083496	0.10254	24.467	164.858	568.576	-0.23438	0.31543	-0.51709	30.201	151.281	629.0824	-0.68838	0.43096	-0.62334	-40.096	19.3287	40.22	0.14502	0.125	0.16846	26.1563	38.9281	1341.62	-1.4448	0.53613	-1.896	-26.4	-227.817	1399.227	-1.6526	0.71358	-0.85303	-50.1209	26.634	30.255	0.06543	0.023438	-0.26807
1.986	-72.989	17.902	14.499	0.14453	0.071289	0.10645	9.267	132.322	566.5895	-0.2041	0.29199	-0.5	-40.321	163.203	580.963	-0.64541	0.39834	-0.59443	-26.465	36.637	20.71	0.14258	0.12305	0.17139	-4.76702	0.809999999999999	1324.2049	-1.4399	0.5376	-1.8784	-24.4	-226.989	1479.635	-1.6847	0.7792	-0.9292	-73.45	11.891	43.7343	0.053222	0.050391	-0.28223
1.988	-52.102	18.272	47.19319	0.13379	0.059082	0.10572	48.177	148.7661	538.5515	-0.18164	0.28418	-0.49316	-34.359	156.563	574.52291	-0.60557	0.36396	-0.57646	-63.6039	-5.6225	17.3998	0.14502	0.12695	0.16797	17.354	-2.119	1331.0716	-1.4077	0.53564	-1.8452	-66.965	-163.534	1524.937	-1.7333	0.84892	-0.99074	-41.175	60.372	56.6413	0.042188	0.078125	-0.30029
1.99	-42.969	24.0938	33.487	0.12695	0.05127	0.1001	1.232	144.638	468.2525	-0.14063	0.26416	-0.47803	-7.41	202.846	547.79	-0.56552	0.32871	-0.5417	-4.581	32.9971	21.1008	0.14502	0.13623	0.1665	6.9011	26.8395	1292.41	-1.3813	0.53686	-1.8271	-127.461	-151.156	1541.569	-1.8022	0.91064	-1.0425	-75.5141	30.8528	43.7574	0.027734	0.097265	-0.31787
1.992	-72.727	21.703	39.3818	0.12256	0.050293	0.09668	17.423	99.563	444.5916	-0.10352	0.25049	-0.45996	-52.049	194.748	517.3583	-0.52734	0.29834	-0.50879	-19.585	36.302	-1.554	0.14624	0.14722	0.15869	-54.846	26.8209	1255.945	-1.3491	0.5376	-1.8013	-82.0304	-147.923	1549.52	-1.8728	0.97002	-1.0716	-71.6107	39.2379	106.0976	0.017285	0.11709	-0.33027
1.994	-22.525	54.0245	45.8287	0.12109	0.050781	0.085938	-0.0569999999999951	127.3814	429.433	-0.071289	0.23389	-0.4502	-32.003	163.126	509.5625	-0.48896	0.26631	-0.48135	-30.991	18.2148	29.5965	0.14307	0.15967	0.14648	-25.478	90.154	1276.29	-1.3125	0.53613	-1.7617	-80.741	-117.568	1519.918	-1.9515	1.0181	-1.0939	-50.68	74.597	137.7	0.0014648	0.12939	-0.34717
1.996	-58.5023317	41.021	18.5797	0.11719	0.063965	0.070313	-44.613	126.6869	430.678	-0.030273	0.2124	-0.43506	-56.1934	176.178	464.569	-0.45205	0.23203	-0.45869	0.779	58.143	33.2695	0.13721	0.17969	0.13184	-47.0292	84.204	1248.7697	-1.2964	0.53369	-1.7437	-85.02	-144.922	1522.16	-2.0171	1.0602	-1.1103	-46.5562	48.802	196.413	-0.018652	0.13858	-0.36152
1.998	-60.6376	25.0795	35.9087	0.11597	0.07373	0.055664	8.834	120.629	432.693	-0.010742	0.20361	-0.42432	-78.15216	140.922	456.6818	-0.41416	0.19961	-0.43017	-26.626	22.3161	12.6608	0.13574	0.19336	0.125	-49.3272	32.2431	1274.523	-1.2578	0.52344	-1.7051	-83.064	-157.104	1545.2599	-2.0726	1.102	-1.1198	-9.487	76.3133	299.166	-0.043945	0.13877	-0.38067
2	-9.736	37.971	31.1301	0.10889	0.088867	0.031738	-33.52	160.149	404.468	0.024414	0.17969	-0.41162	-38.785	148.0821	442.664	-0.37246	0.17148	-0.4082	-11.778	26.2986	30.6066	0.12842	0.21924	0.10498	16.7881	41.4777	1247.7955	-1.2295	0.51318	-1.6744	-124.447	-144.143	1554.213	-2.1172	1.1357	-1.127	-18.3726	74.6528	390.375	-0.087696	0.13174	-0.39668
2.002	-56.714	13.8596	8.134	0.09668	0.1084	0.0058594	-51.7411	106.5565	376.225	0.047364	0.16357	-0.40088	-71.81	168.0818	398.4584	-0.34033	0.15137	-0.38428	-3.958	52.937	2.442	0.11914	0.24024	0.091309	-29.883	-19.131	1209.496	-1.2002	0.50391	-1.6484	-69.5504	-173.491	1598.1018	-2.1689	1.169	-1.1345	-9.6602	48.982	556.966	-0.15	0.12002	-0.41513
2.004	-28.78	12.91	31.6003	0.095215	0.1167	-0.0097656	-27.511	93.1577	340.1161	0.063965	0.14844	-0.39307	-55.073	125.932	374.088	-0.30626	0.1209	-0.36465	-36.003	15.0067553	2.5906	0.11279	0.25977	0.07373	27.293	13.698	1208.1134	-1.1621	0.48438	-1.6094	-31.678	-153.988	1623.5054	-2.2137	1.2008	-1.1367	44.195	98.176	709.889	-0.2334	0.098145	-0.44434
2.006	-27.09	13.30316	24.073	0.079102	0.14111	-0.041504	-59.0696	97.531	293.187	0.083984	0.12549	-0.36475	-31.616	138.6054	359.0705	-0.26905	0.099121	-0.34112	-3.183	51.483	26.97	0.10889	0.2915	0.048828	6.878	58.949	1169.6205	-1.1396	0.47754	-1.582	-46.025	-169.437	1637.8473	-2.2508	1.234	-1.1379	53.268	79.119	840.22	-0.33633	0.058594	-0.48262
2.008	-58.216	-4.571	29.2316	0.070556	0.16187	-0.064942	-45.3945	76.071	282.6537	0.088867	0.12109	-0.35596	-79.87459	131.9694	315.416	-0.24131	0.081549	-0.32276	-23.228	36.457	8.0195	0.09668	0.30762	0.043945	-10.1	38.03	1160.149	-1.1016	0.46094	-1.5332	-29.343	-202.07	1672.185	-2.2819	1.2626	-1.1546	55.829	38.216	984.6456	-0.45947	0.013769	-0.53096
2.01	-4.648	17.7602	34.9771	0.062988	0.17773	-0.088379	-30.72	103.48489	264.314	0.10059	0.11768	-0.35059	-27.915	110.2546	313.9216	-0.20235	0.065531	-0.30391	-29.006	0.978	26.4079	0.087891	0.34375	0.017578	44.52	86.9323	1128.72204	-1.073	0.44629	-1.4958	-75.855	-134.913	1666.8	-2.3125	1.3008	-1.1641	40.8981	51.5646	1077.424	-0.6208	-0.032324	-0.5876
2.012	-13.659	28.147	-5.018	0.056152	0.20996	-0.12061	-55.6938	97.118	234.0965	0.10425	0.11743	-0.34497	-53.27	137.962	291.9994	-0.17578	0.048828	-0.2832	-8.046	38.6104	22.9857	0.078857	0.36694	-0.0041504	-9.228	86.1218	1082.759	-1.0469	0.44043	-1.46	-103.8402	-108.379	1677.732	-2.3212	1.3261	-1.168	18.481	1.193	1152.0555	-0.83154	-0.069825	-0.6417
2.014	-31.126	15.794423	16.1134	0.058105	0.229	-0.1416	-25.128	57.675	222.4057	0.1084	0.11865	-0.3335	-75.0347	122.5083	276.0531	-0.14793	0.02919	-0.26357	-44.516	30.9409	13.1848	0.061523	0.39795	-0.027344	19.043	111.257	1072.8756	-1.0073	0.41895	-1.4097	-65.706	-91.026	1700.326	-2.3262	1.3516	-1.1754	44.619	5.974	1226.508	-1.0874	-0.10352	-0.7085
2.016	-4.201	35.353	18.6016	0.050781	0.25635	-0.1875	-45.9775	109.2559	177.024	0.12549	0.11768	-0.31885	-12.078	120.1472	277.1802	-0.13231	0.0017464	-0.24148	-33.37	34.4023	40.611	0.039063	0.44141	-0.056152	34.3694	168.807	1071.6576	-0.98438	0.41113	-1.3848	-102.4669	-63.183	1671.219	-2.309	1.3586	-1.1816	25.4002	-3.581	1213.672	-1.384	-0.11328	-0.76738
2.018	-39.732	18.3056	13.1487	0.044922	0.27783	-0.22021	-56.96161	72.959	176.34	0.12695	0.12305	-0.31348	-68.1681	146.447	226.933	-0.12099	-0.017019	-0.21726	-29.916	58.932	8.04	0.017578	0.47266	-0.078613	-27.821	164.322	1034.6867	-0.93164	0.40088	-1.3418	-54.384	-98.9434	1648.394	-2.2812	1.3582	-1.18	-10.436	-68.179	1277.029	-1.705	-0.10469	-0.84541
2.02	2.182	21.6715	25.0897	0.040039	0.29492	-0.2583	-15.907	89.118	187.9556	0.13232	0.12793	-0.30908	-41.061	113.4865	233.58231	-0.11357	-0.041228	-0.19736	-75.646	23.3695	5.5607	-0.0058594	0.50488	-0.10205	-5.84399999999999	168.787	1015.3976	-0.88989	0.39136	-1.2996	-52.051	-61.6	1594.34	-2.2461	1.3398	-1.1758	45.21	-39.574	1305.85	-2.0226	-0.061328	-0.93565
2.022	-7.031	45.972	1.47	0.020996	0.31982	-0.31445	-59.7554	127.838	152.757	0.13501	0.13476	-0.30542	-27.599	140.325	226.2042	-0.10742	-0.060059	-0.18604	-37.608	30.0773	39.8012	-0.035645	0.54102	-0.13965	-17.611	158.948	956.563	-0.84961	0.37891	-1.2627	-102.7359	-31.6076	1554.687	-2.2022	1.315	-1.1715	4.735	-53.317	1289.5826	-2.3192	0.032422	-1.0324
2.024	-27.996	12.2243	26.9313	0.0078125	0.33398	-0.34277	-43.592	77.8224	145.6284	0.1416	0.13916	-0.30273	-63.399	142.479	200.8473	-0.10166	-0.071854	-0.16789	-43.24	12.115	43.858	-0.055664	0.55225	-0.15576	-27.163	119.7347	933.5866	-0.79883	0.36133	-1.209	-69.915	-34.801	1556.26	-2.1526	1.2938	-1.1628	-15.185	-74.999	1328.994	-2.5581	0.17285	-1.1304
2.026	2.631	13.19075	55.4401	-0.037109	0.36328	-0.39941	-36.291	103.032	117.551	0.15527	0.14404	-0.30322	-13.333	87.8065	195.129	-0.1	-0.08465	-0.15531	-92.4148	-16.7562	104.8715	-0.098145	0.58398	-0.19873	11.588	134.765	933.524	-0.77539	0.34961	-1.1836	-81.731	12.0754	1536.482	-2.1089	1.2766	-1.1519	12.782	-56.7326	1290.7489	-2.68	0.40166	-1.2152
2.028	-39.497	20.2536	28.717	-0.080566	0.37768	-0.42944	-53.534	95.0328	106.1044	0.1626	0.14404	-0.2998	-38.797	112.822	150.767	-0.098835	-0.090889	-0.14515	-45.24	43.855	109.2163	-0.14258	0.59351	-0.23242	-35.667	145.959	883.0341	-0.72754	0.3291	-1.1191	-48.192	-9.9114	1522.876	-2.0667	1.2618	-1.1374	-19.391	-104.236	1272.0486	-2.7253	0.78448	-1.2511
2.03	-16.302	3.9284	61.8739	-0.13428	0.39746	-0.46338	14.112	62.2638	109.5711	0.18457	0.14551	-0.28516	-62.012	84.4726	147.8888	-0.093094	-0.096462	-0.13539	-89.8891	39.3352	126.09	-0.18945	0.59473	-0.27539	-55.741	117.3735	854.8861	-0.69824	0.31079	-1.0684	-39.243	-22.11714	1532.025	-2.021	1.2563	-1.1265	-18.018	-69.022	1315.8754	-2.7366	1.22	-1.3358
2.032	-24.66	20.204	99.1635	-0.21289	0.41553	-0.51074	-15.342	128.872	80.218	0.19506	0.13989	-0.27784	-3.107	71.41272	133.341	-0.087891	-0.099609	-0.12939	-93.406	45.3731	221.2055	-0.26855	0.58203	-0.34863	-28.652	132.358	822.928	-0.67139	0.29102	-1.021	-66.356	20.3919	1500.889	-1.9813	1.259	-1.1035	-63.782	-11.933	1319.473	-2.6217	1.4854	-1.4912
2.034	-94.3055	-7.7149	142.55205	-0.25488	0.41309	-0.54297	3.738	84.4678	78.5626	0.20068	0.13867	-0.26563	-31.527	105.6723	128.882	-0.083937	-0.10194	-0.12969	-79.877	72.77	318.751	-0.31641	0.57129	-0.39844	-91.74119	99.142	784.318	-0.63232	0.27002	-0.96143	-60.826	3.425	1490.434	-1.9387	1.2615	-1.0805	-104.836	-7.84099999999999	1349.53	-2.2778	1.5356	-1.6089
2.036	-39.452	-3.11143	222.6386	-0.3457	0.43311	-0.60938	14.231	66.208	82.9333	0.20264	0.13965	-0.25244	-41.99	69.811	135.5469	-0.069623	-0.10518	-0.12759	-101.134	37.439	450.604	-0.44531	0.53516	-0.49512	-65.831	91.098	771.8923	-0.61084	0.26025	-0.92725	-68.404	63.531	1476.6639	-1.8996	1.2615	-1.0594	-107.415	25.806	1371.3581	-1.7091	1.4444	-1.5848
2.038	-42.209	24.48	270.507	-0.43677	0.43628	-0.68042	-51.24	81.557	57.66	0.20947	0.1377	-0.24658	-17.099	80.037	141.683	-0.058588	-0.10334	-0.13189	-55.537	50.0687	613.626	-0.573	0.4934	-0.57276	-79.4255	132.7838	742.4319	-0.57715	0.23486	-0.87451	-101.1901	67.537	1454.0891	-1.8545	1.2556	-1.0338	-163.393	-18.159	1313.247	-1.1951	1.2669	-1.4964
2.04	-106.3155	22.799	395.844	-0.5542	0.43408	-0.74756	-1.78299999999999	23.216	75.765	0.21191	0.13037	-0.23486	-72.9744	74.769	119.874	-0.040831	-0.10795	-0.13269	-86.262	45.3943	753.739	-0.72607	0.4502	-0.63916	-114.059	140.7911	712.1678	-0.54883	0.22144	-0.81933	-57.572	6.042	1465.7687	-1.8164	1.2441	-1.0039	-149.5957	-87.809	1350.977	-0.86104	0.98682	-1.4085
2.042	-63.033	52.6922	551.728	-0.75635	0.43604	-0.82764	8.813	70.096	47.0751	0.2168	0.12427	-0.22192	-29.45	36.19409	127.155	-0.03125	-0.11035	-0.13623	-95.552	28.291	888.483	-0.97803	0.40869	-0.72412	-52.359	179.958	712.272	-0.52539	0.20166	-0.77441	-59.505	8.408	1448.5727	-1.7804	1.2235	-0.9749	-134.291	-77.022	1363.289	-0.68838	0.69775	-1.346
2.044	-43.738	54.53717	656.029	-0.88428	0.43604	-0.8667	-40.434	92.781	38.2957	0.21875	0.11572	-0.2124	-49.789	86.404	97.2583	-0.013164	-0.11364	-0.14201	-87.336	69.751	989.124	-1.1147	0.40283	-0.75537	-83.8317	201.839	664.9216	-0.49561	0.18799	-0.71631	-65.4746	-22.0639	1424.17343	-1.744	1.1993	-0.94561	-153.745	-126.8958	1385.4122	-0.60547	0.49219	-1.3086
2.046	-53.824	44.351	761.3054	-1.1709	0.45508	-0.9375	-12.572	51.921	62.294	0.21387	0.09668	-0.19482	-67.856	54.4296	84.2253	0.0048828	-0.12202	-0.14116	-132.099	37.5929	1053.74	-1.3906	0.42285	-0.79785	-80.52142	174.0793	632.151	-0.47559	0.17773	-0.68945	-46.545	-3.759	1397.33	-1.7085	1.1661	-0.91787	-112.5107	-142.497	1408.8223	-0.57227	0.38155	-1.2666
2.048	-22.926	73.335	872.736	-1.4031	0.49146	-0.98316	-43.865	89.39	47.349	0.20508	0.09082	-0.1875	-17.032	31.187202	85.4862	0.011471	-0.12604	-0.13541	-108.581	3.8	1127.215	-1.5723	0.50098	-0.82031	-44.881	195.44	608.0575	-0.43701	0.1626	-0.62939	-77.5596	55.319	1333.9174	-1.6757	1.1372	-0.89229	-98.0434	-164.427	1398.036	-0.57461	0.31758	-1.241
2.05	-101.757	62.737	961.3035	-1.6113	0.54883	-1.0156	-51.577	51.69633	47.9267	0.19141	0.073242	-0.16846	-74.1862	67.1527	38.073	0.014921	-0.1297	-0.13201	-89.79	-1.868	1135.484	-1.7065	0.61768	-0.82178	-84.85	175.60626	566.818	-0.39624	0.15137	-0.58667	-60.132	30.345	1322.1139	-1.6426	1.1094	-0.87207	-73.775	-238.498	1410.1571	-0.6207	0.28047	-1.2445
2.052	-80.843	64.936	1069.189	-1.8276	0.67822	-1.0542	-20.579	36.882	58.096	0.18383	0.060547	-0.16211	-46.204	14.891	59.94717	0.025879	-0.13232	-0.12451	-98.2645	-63.0507	1147.045	-1.7944	0.8501	-0.81299	-49.818	150.335	560.32857	-0.34766	0.14453	-0.54883	-47.765	63.6659	1293.755	-1.6056	1.0866	-0.85205	-51.622	-207.905	1443.953	-0.65664	0.26231	-1.2705
2.054	-62.868	72.762	1075	-1.896	0.76611	-1.064	-70.3404	67.43926	34.4605	0.17773	0.047852	-0.15039	-34.47	35.62124	49.8152	0.028592	-0.13733	-0.11994	-70.231	-71.342	1161.384	-1.7969	0.98828	-0.81885	-56.162	169.521	507.888	-0.28223	0.13281	-0.50098	-57.089	76.3962	1256.45	-1.569	1.0594	-0.83037	-75.2331	-197.545	1477.863	-0.68213	0.2666	-1.2925
2.056	-107.2381	11.38819	1064.487	-1.939	1.0122	-1.0952	-34.203	8.884	35.1861	0.16943	0.034668	-0.14111	-91.7437	63.71473	33.8527	0.032098	-0.13196	-0.11356	-72.2137	-58.8228	1144.189	-1.7241	1.2329	-0.85693	-69.4901	133.369	464.247	-0.24854	0.13037	-0.48193	-12.954	61.835	1289.718	-1.5319	1.0395	-0.81358	-56.825	-205.84	1545.087	-0.70254	0.29082	-1.3056
2.058	-50.485	-29.3384	1081.578	-1.8884	1.1789	-1.1414	-23.624	49.751	10.393	0.16602	0.027344	-0.13281	-40.287	22.7593	45.793	0.037571	-0.12836	-0.10919	-88.4439	-73.698	1182.763	-1.6111	1.3518	-0.89722	-8.631	133.1371	455.743	-0.17383	0.10938	-0.43408	-34.805	134.375	1280.728	-1.4935	1.017	-0.7998	-14.722	-125.35	1560.811	-0.73672	0.32168	-1.3129
2.06	-68.7475	-46.962	1059.513	-1.75	1.293	-1.1895	-68.548	54.6533	-0.0729999999999986	0.15625	0.0087891	-0.12842	-52.976	60.281	6.125	0.045923	-0.12498	-0.10146	-41.466	-52.766	1170.403	-1.4702	1.4224	-0.93604	-53.698	152.1394	421.626	-0.1294	0.096436	-0.40063	-72.04259	138.303	1240.2	-1.4556	0.99463	-0.78369	-33.9508	-122.758	1536.911	-0.81484	0.34512	-1.3317
2.062	-44.3863	-75.75265	1078.331	-1.4233	1.3442	-1.2163	-21.643	-3.692	37.0794	0.14282	0.00048827	-0.12158	-76.36283	34.3012	18.0853	0.056152	-0.12305	-0.099609	-41.214	-101.895	1134.899	-1.3022	1.4009	-0.95361	-33.396	128.8913	443.36	-0.083984	0.074707	-0.37207	-78.098	141.091	1211.206	-1.4254	0.97148	-0.77207	-20.8175	-97.024	1547.609	-0.94658	0.36983	-1.3759
2.064	8.359	-40.076	1080.1455	-1.2402	1.3281	-1.2109	-51.21	49.0303	30.1476	0.13721	-0.0063477	-0.11133	-18.551	8.4822	42.8351	0.06449	-0.11667	-0.085872	-23.922	-145.426	1175.3039	-1.25	1.3633	-0.94141	-1.149	156.746	429.3249	-0.039551	0.061035	-0.34277	-70.098	177.48	1145.71	-1.3871	0.94453	-0.76035	13.0317	-46.842	1537.072	-1.1187	0.40137	-1.4116
2.066	-30.47217	-48.1994	1075.326	-0.92334	1.2349	-1.1733	-58.8356	9.781	35.4622	0.11719	-0.015625	-0.10547	-68.636	48.1938	16.591	0.064028	-0.11776	-0.077121	-13.02	-113.804	1207.924	-1.2441	1.2324	-0.87646	-38.999	140.7568	414.161	-0.014648	0.047363	-0.32178	-57.638	126.839	1129.0888	-1.3574	0.92188	-0.74785	-0.629000000000001	-86.969	1539.9922	-1.3042	0.44854	-1.471
2.068	-16.353	-91.458	1111.55831	-0.81763	1.1243	-1.1345	-52.3993	9.8097	31.3934	0.11182	-0.01416	-0.09668	-50.797	8.233	22.3996	0.065114	-0.11404	-0.064613	-63.9486	-126.133	1236.51	-1.3206	1.0989	-0.82422	15.366	96.3508	420.827	0.027344	0.039063	-0.28711	-18.903	148.273	1112.6054	-1.3224	0.89766	-0.73496	67.3537	-38.135	1563.3212	-1.464	0.51445	-1.5377
2.07	25.384	-107.495	1094.476	-0.80957	0.99219	-1.0938	-78.1238	54.655	25.936	0.097168	-0.025391	-0.085449	-30.061	26.376	16.6366	0.062925	-0.11655	-0.057383	-70.969	-105.98	1283.798	-1.4336	0.96875	-0.78613	7.884	122.914573	384.4217	0.058838	0.037109	-0.2666	-32.869	132.194	1062.1826	-1.2905	0.87451	-0.72217	85.366	-28.097	1538.882	-1.5703	0.59102	-1.608
2.072	-7	-146.3576	1133.276	-0.90918	0.81543	-1.0654	-32.514	-6.3962	40.5453	0.085693	-0.027832	-0.077636	-70.3722	50.8544	-5.9537	0.062012	-0.11963	-0.049805	-85.7426	-123.09	1239.705	-1.5781	0.83594	-0.75195	-14.357	95.413	351.9762	0.088867	0.034668	-0.24756	-20.842	101.5152	1060.622	-1.2617	0.84668	-0.71094	90.968	-70.7132	1571.6848	-1.617	0.65879	-1.6713
2.074	9.691	-110.368	1195.502	-0.96436	0.7417	-1.0444	-32.859	33.553	24.3738	0.071289	-0.033203	-0.074219	-9.378	2.6081	8.2696	0.05965	-0.12068	-0.040653	-101.8869	-234.416	1229.155	-1.6401	0.7915	-0.73193	16.402	103.259	314.9549	0.12744	0.040527	-0.22266	-32.8082	137.686	1012.2846	-1.2344	0.82579	-0.6957	111.62	-18.691	1589.31	-1.625	0.69922	-1.7402
2.076	-8.2934	-89.756	1191.4649	-1.0874	0.62744	-1.0308	-40.906	29.8299	8.051	0.061523	-0.041992	-0.061523	-28.822	56.649	4.7528	0.060461	-0.12414	-0.033203	-51.233	-252.271	1263.387	-1.7349	0.73682	-0.72803	-19.305	128.4594	268.975	0.14697	0.047363	-0.21143	-19.009	102.431	965.00116	-1.2031	0.80547	-0.67968	86.83	-50.4753	1586.4216	-1.5951	0.69981	-1.7971
2.078	-38.6418	-137.232	1205.4912	-1.1595	0.57934	-1.032	-12.916	-15.7926	32.2015	0.054688	-0.039063	-0.05127	-28.016	30.631	9.3004	0.058915	-0.12962	-0.032059	-71.5243	-298.926	1292.466	-1.7664	0.72094	-0.75562	-13.727	86.246	257.4787	0.18848	0.049316	-0.19873	12.719	110.232	947.3682	-1.1771	0.78145	-0.66367	87.477	-48.465	1633.772	-1.5643	0.68711	-1.8519
2.08	-5.976	-160.462	1173.497	-1.2227	0.56543	-1.0645	-30.954	51.1171	22.336	0.052734	-0.039551	-0.048828	10.936	10.674	31.4352	0.063239	-0.13599	-0.027581	-61.448	-335.866	1364.037	-1.7852	0.7207	-0.80176	-2.01900000000001	100.1824	257.8814	0.21484	0.059814	-0.19165	-20.792	160.009	882.483	-1.1401	0.77002	-0.64404	83.68	-11.7286	1599.497	-1.5502	0.6793	-1.9075
2.082	-32.836	-241.7922	1154.854	-1.2871	0.59766	-1.1465	-14.995	14.384	32.914	0.052246	-0.037109	-0.035644	-49.3175	49.81753	12.025	0.068359	-0.13916	-0.018555	-39.122	-303.241	1339.2147	-1.7925	0.75244	-0.89209	-48.347	105.4956	226.252	0.23779	0.066895	-0.1875	-36.188	135.759	878.493	-1.1085	0.74307	-0.62295	18.6152	-77.914	1607.316	-1.5613	0.68574	-1.9596
2.084	14.893	-293.055	1221.9813	-1.3184	0.63086	-1.1875	15.332	6.5472	31.7295	0.057617	-0.037109	-0.029297	-17.884	22.422	32.6236	0.071905	-0.13963	-0.017373	-25.417	-343.542	1304.3625	-1.8022	0.77393	-0.92725	-29.253	71.8579	222.58	0.26221	0.074707	-0.17627	-25.875	188.113	867.4902	-1.069	0.72236	-0.61475	51.901	-44.6482	1630.387	-1.5854	0.7085	-2.0054
2.086	19.399	-274.266	1250.987	-1.3979	0.69873	-1.271	-36.628	51.746	4.282	0.071777	-0.038574	-0.018555	-2.645	39.8569	23.0436	0.078847	-0.14552	-0.011028	39.977	-333.771	1349.217	-1.8379	0.83594	-1.002	-58.176	118.771	201.675	0.2793	0.077637	-0.17969	-41.6236	184.113	831.351	-1.0296	0.70088	-0.59248	41.799	-55.1906	1605.1	-1.6138	0.75654	-2.047
2.088	-22.595	-306.869	1278.2777	-1.4805	0.75244	-1.3145	-0.427	-10.7251	17.5178	0.07959	-0.044922	-0.011963	-40.379	68.939	17.2003	0.085462	-0.14942	-0.0051431	41.311	-292.049	1396.218	-1.8794	0.89502	-1.0503	-60.6247	97.06672	192.151	0.30566	0.084473	-0.17139	-21.476	150.572	817.615	-0.98896	0.67822	-0.57764	14.9508	-77.9614	1600.302	-1.634	0.81953	-2.082
2.09	47.35307	-296.201	1302.401	-1.5684	0.80078	-1.3516	-3.307	28.0753	10.4859	0.086914	-0.052734	-0.0048828	-15.269	28.687	32.0086	0.09609	-0.14961	-0.0010843	-5.56	-311.483	1486.2059	-1.9272	0.94971	-1.0894	-36.616	92.1716	197.676	0.3252	0.09375	-0.1687	-15.752	187.189	751.815	-0.94727	0.65137	-0.55908	51.646	-6.169	1562.8895	-1.6383	0.88867	-2.1121
2.092	51.623	-272.221	1294.349	-1.6792	0.85596	-1.3901	-40.3142	37.415	5.5033	0.097168	-0.058105	0.0014648	-44.698	78.454	10.555	0.10303	-0.1543	-0.0019531	-12.531	-244.688	1564.016	-1.98	1.0142	-1.1245	-80.9634	130.42	161.647	0.33691	0.094727	-0.16992	-38.418	152.2393	700.611	-0.90615	0.62549	-0.54209	27.8245	-16.1938	1485.159	-1.6206	0.93252	-2.1269
2.094	36.225	-268.823	1357.4046	-1.7261	0.88525	-1.4019	5.387	-11.2551	23.1368	0.10254	-0.064941	0.0068359	-48.9214	56.524	21.1182	0.1077	-0.15605	0.00018931	-59.7789	-200.037	1552.666	-2.0015	1.0337	-1.1382	-58.9482	82.6349	150.3874	0.35547	0.095703	-0.16699	-7.305	168.8343	680.852	-0.86074	0.59707	-0.52617	10.01217	2.145	1475.537	-1.5957	0.93945	-2.1211
2.096	42.4235	-209.164	1434.8977	-1.7925	0.93213	-1.4253	-23.967	49.056	14.824	0.1084	-0.084961	0.013184	-16.238	28.8962	37.9082	0.11922	-0.15196	0.001267	-75.637	-193.525	1581.816	-2.0371	1.0781	-1.1602	-44.539	88.976	151.9302	0.35791	0.099121	-0.16406	-23.503	192.3555	631.855	-0.81347	0.57011	-0.50859	-10.8301	37.5033	1436.477	-1.5622	0.91904	-2.09
2.098	-26.347	-190.58738	1465.5655	-1.8257	0.96533	-1.4409	-25.65	10.052	19.002	0.10718	-0.088379	0.018798	-57.69	56.9149	30.099	0.12978	-0.15039	0.0036113	-63.233	-122.693	1556.9851	-2.0562	1.1118	-1.1792	-81.6284	96.0686	120.9086	0.35986	0.095215	-0.1626	-22.641	119.113	611.77305	-0.7621	0.53808	-0.49375	-14.1151	-0.275000000000002	1407.455	-1.5386	0.87236	-2.0402
2.1	-54.263	-175.487	1514.694	-1.8433	0.98975	-1.4565	5.101	4.6455	16.2105	0.10449	-0.092773	0.02002	-38.62	12.816	30.0829	0.14062	-0.15303	-0.0002933	-98.584	-135.029	1535.522	-2.0859	1.1523	-1.2031	-39.097	41.107	104.444037	0.3562	0.092285	-0.16137	6.397	157.7447	575.2439	-0.71289	0.50586	-0.47266	11.627	48.9934	1407.51413	-1.5034	0.80049	-1.9917
2.102	-26.59	-113.078	1534.8796	-1.8726	1.019	-1.4761	-31.399	53.58	11.4676	0.11084	-0.10107	0.023926	-19.409	32.7953	31.784	0.15234	-0.1543	-0.0024414	-81.672	-126.001	1578.561	-2.1387	1.2148	-1.2402	-63.227	88.212	84.104	0.3501	0.088867	-0.15869	-18.279	157.6347	522.845	-0.66524	0.48145	-0.4586	-30.917	75.6626	1329.015	-1.4561	0.71445	-1.9459
2.104	-53.33532	-137.629	1541.80663	-1.8982	1.0515	-1.4939	-21.494	4.9132	12.6498	0.10742	-0.10352	0.018066	-51.4024	63.5766	22.157	0.16661	-0.15283	-0.0020511	-76.5988	-99.747	1592.093	-2.1738	1.252	-1.2637	-82.259	55.793	80.129	0.34277	0.084961	-0.16016	-8.851	143.0929	535.816	-0.62179	0.45371	-0.4417	-51.2064	48.1901	1330.001	-1.396	0.62891	-1.9077
2.106	-11.349	-131.612	1558.4962	-1.9219	1.082	-1.5117	-13.113	43.422	4.6922	0.11084	-0.10791	0.02002	-15.652	11.1506	55.916	0.17334	-0.15694	-0.0039074	-77.916	-167.952	1645.9974	-2.2285	1.332	-1.3125	-26.195	38.3763	109.1569	0.3335	0.085449	-0.15771	-41.099	199.566	510.946	-0.57335	0.42638	-0.42647	-41.0718	102.092	1329.491	-1.3373	0.56035	-1.8777
2.108	-31.313	-100.386	1526.589	-1.9434	1.1113	-1.5234	-46.2053	54.3629	-4.1135	0.11401	-0.10742	0.013916	-35.441	62.132	37.068849	0.18389	-0.16202	-0.0050778	-35.447	-149.382	1673.3918	-2.2588	1.3965	-1.3467	-70.22771	95.622	70.432	0.32666	0.09082	-0.15625	-53.18	161.0845	481.8019	-0.5297	0.39873	-0.40567	-76.552	85.295	1302.792	-1.291	0.52109	-1.8578
2.11	-67.0166	-140.343	1530.2835	-1.9531	1.123	-1.5254	-32.466	-5.84568	2.3279	0.12158	-0.1123	0.013672	-66.07703	29.2803	29.5911	0.18711	-0.16377	-0.0092782	-39.546	-152.607	1667.116	-2.2808	1.4614	-1.3726	-45.796	56.52985	65.5122	0.31445	0.097414	-0.15381	-27.464	162.8833	482.654	-0.48486	0.37256	-0.38623	-44.022	87.731	1304.3434	-1.2601	0.51485	-1.848
2.112	-17.8405	-94.2465	1563.052	-1.9702	1.1255	-1.5132	-62.796	60.317	5.109	0.12695	-0.10107	0.0087891	-27.871	11.8305	40.02005	0.18994	-0.16357	-0.023438	-34.971	-169.543	1712.592	-2.2847	1.5278	-1.4019	-9.33300000000001	85.408	70.5325	0.29883	0.10205	-0.15576	-34.8369	175.38	436.2969	-0.44363	0.34521	-0.36298	-13.679	115.236	1262.542	-1.2411	0.52412	-1.8337
2.114	-22.3066	-121.708	1575.887	-1.9883	1.1162	-1.5019	-68.9249	33.801	13.5576	0.12793	-0.092773	0.0024414	-77.1836	58.409	21.097	0.18946	-0.17119	-0.024609	-56.805	-72.331	1712.385	-2.2793	1.5547	-1.4111	-60.7899	105.292	63.1162	0.2793	0.1084	-0.15283	-37.063	124.2945	428.178	-0.40163	0.32508	-0.34013	-33.013	63.0851	1248.5449	-1.2261	0.55127	-1.8237
2.116	-2.777	-158.458	1633.504	-2.0049	1.1025	-1.4883	-34.413	24.61361	24.5971	0.13525	-0.085449	-0.0024414	-58.898	9.1148	29.864	0.18711	-0.17656	-0.026855	-98.0882	-75.217	1719.823	-2.2456	1.5806	-1.3999	-12.93	53.7341	71.628	0.26855	0.10938	-0.1582	-34.303	174.385	385.8135	-0.36646	0.30007	-0.32293	25.4666	103.342	1244.0148	-1.1974	0.57559	-1.8059
2.118	26.859	-112.538	1650.9427	-2.0039	1.0723	-1.4688	-68.11302	74.703	2.709	0.14453	-0.078613	-0.0078125	-29.637	26.786	40.6291	0.18437	-0.18203	-0.031933	-102.769	-90.73911	1741.66	-2.2165	1.5617	-1.3864	-3.932	91.831	27.8689	0.23779	0.11279	-0.15674	-31.547	171.244	330.6881	-0.32945	0.28768	-0.31014	-11.318	111.9988	1207.153	-1.1637	0.59639	-1.7856
2.12	-10.683	-128.635	1648.044	-1.9937	1.061	-1.4487	-38.215	17.9216	15.2259	0.15234	-0.071777	-0.012207	-64.5934	49.4543	17.616	0.17842	-0.18106	-0.038183	-109.988	-63.475	1722.021	-2.1797	1.5391	-1.3535	-8.547	66.7467	27.2139	0.21215	0.12085	-0.15992	-38.508	132.5072	326.7984	-0.28564	0.26514	-0.29443	-0.942	89.671	1216.5722	-1.1313	0.61162	-1.764
2.122	-10.271	-80.2983	1687.086	-1.9629	1.042	-1.4258	-56.928	55.9	15.1073	0.16406	-0.072754	-0.020996	-32.07	2.8735	28.8111	0.17139	-0.17822	-0.046387	-114.9888	-125.263	1725.207	-2.1382	1.4966	-1.2983	10.341	27.3084	53.632	0.18652	0.12939	-0.1665	-31.017	162.2525	291.373	-0.24927	0.24788	-0.27513	64.2557	136.327	1195.3876	-1.106	0.61094	-1.7424
2.124	-29.1903	-16.48	1657.192	-1.9275	1.0305	-1.4065	-41.408	71.4974	3.1148	0.16602	-0.072266	-0.023926	-37.916	51.297	23.054	0.16387	-0.16699	-0.053321	-86.067	-76.359	1707.3839	-2.1128	1.4731	-1.2759	-26.65	71.3611	28.1338	0.15332	0.14209	-0.17188	-23.069	86.609	280.906	-0.21135	0.23435	-0.25952	0.854000000000003	108.933	1136.9065	-1.082	0.60742	-1.707
2.126	-55.1231	-60.702	1664.704	-1.8823	1.0278	-1.3882	-15.986	6.4742	24.801	0.16943	-0.07373	-0.040039	-49.667	43.1608	20.4296	0.15869	-0.15586	-0.06084	-93.283	-43.761	1647.067	-2.0508	1.4141	-1.2207	0.511000000000003	31.853	33.1253	0.13965	0.14844	-0.17578	-32.96	100.999	274.556	-0.17815	0.21288	-0.24275	20.865	122.7375	1124.198	-1.0688	0.59492	-1.6758
2.128	0.0519999999999996	-34.891	1655.187	-1.8315	1.0161	-1.3706	-59.6889	65.7111	13.017	0.17407	-0.076416	-0.046875	0.472000000000001	24.5857	35.694	0.15635	-0.14102	-0.072168	-93.002	-49.2025	1602.056	-1.997	1.3701	-1.1875	13.938	49.38	10.0695	0.11084	0.17334	-0.18262	-34.574	138.875	246.31	-0.14482	0.18737	-0.22395	25.131	177.852	1098.20501	-1.0586	0.58515	-1.6316
2.13	-22.771	-61.943	1590.7661	-1.8047	1.0078	-1.3613	-32.129	28.115	23.2443	0.17725	-0.072266	-0.055664	-47.415	58.287	23.522	0.16084	-0.12061	-0.089356	-83.866	10.0401	1566.135	-1.9355	1.332	-1.1631	-35.716	75.019	19.1545	0.085938	0.19336	-0.18799	-44.344	105.183	238.801	-0.11865	0.16846	-0.20508	-6.72799999999999	157.045	1071.1769	-1.0543	0.56992	-1.5907
2.132	-29.721	-66.509	1605.411	-1.7676	1.0039	-1.3398	-3.763	13.436	43.90774	0.17041	-0.072266	-0.067383	-17.26	-5.446	32.0352	0.16406	-0.10303	-0.10303	-70.484	-29.3325	1541.286	-1.8633	1.2988	-1.1426	-25.729	13.6	49.166	0.080078	0.20947	-0.18848	-28.457	162.17	228.72311	-0.093418	0.14683	-0.19302	9.705	182.14	1041.98	-1.0498	0.56192	-1.5478
2.134	16.918	-4.45647	1563.794	-1.7427	1.0044	-1.3266	-38.16	74.616	27.6937	0.1709	-0.075684	-0.074219	-9.19	-4.688	35.8958	0.17304	-0.084961	-0.12061	-31.815	-30.495	1567.3249	-1.8281	1.2871	-1.127	-11.061	50.971	23.5305	0.075195	0.23047	-0.18945	-64.807	145.37	190.398	-0.06991	0.12069	-0.17873	-42.232	171.82	976.9741	-1.0308	0.54932	-1.5112
2.136	-26.507	-23.6446	1531.208	-1.7183	0.99463	-1.3081	-9.513	12.1094	33.772	0.16748	-0.068359	-0.088379	-53.5284	34.2972	23.3683	0.18027	-0.070508	-0.13848	-42.473	13.943	1527.151	-1.7593	1.2622	-1.105	-29.816	26.725	26.8658	0.081543	0.25	-0.18798	-59.044	106.194	204.309	-0.052267	0.10466	-0.16785	-38.14	148.5956	973.961	-1.0076	0.54453	-1.4703
2.138	4.946	8.0357	1530.5586	-1.6753	0.99463	-1.2827	-10.421	45.669	29.9615	0.15747	-0.061768	-0.10327	-15.047	-0.290999999999999	26.3195	0.18731	-0.055664	-0.16113	-49.832	-23.7859	1510.942	-1.7119	1.249	-1.0884	-36.42	-7.1687	40.33	0.095703	0.26025	-0.1792	-23.451	140.557	186.8944	-0.038845	0.080574	-0.16205	-18.332	190.083	953.8515	-0.97285	0.53692	-1.4313
2.14	4.636	28.452	1505.17	-1.6543	0.98535	-1.2676	-41.516	51.361	29	0.14746	-0.050781	-0.1123	-25.274	54.79	3.72	0.18643	-0.045313	-0.17139	-46.216	31.694	1494.795	-1.6636	1.2329	-1.0737	-62.1084	52.1467	29.5134	0.11523	0.28076	-0.16797	-34.045	76.8807	179.5875	-0.019043	0.05957	-0.1582	-47.302	167.0412	908.8569	-0.93105	0.52871	-1.3942
2.142	-13.9	-16.7246	1513.8234	-1.6211	0.9707	-1.2402	-2.178	-1.501731	40.117	0.13428	-0.03125	-0.12842	-42.742	31.71237	10.78466	0.17773	-0.038574	-0.18701	-90.8321	32.3394	1461.092	-1.6055	1.1992	-1.0527	-24.743	18.237	29.4923	0.12598	0.28125	-0.16943	-28.178	95.0544	174.1346	-0.010722	0.039065	-0.15466	-61.676	168.4348	877.4411	-0.88643	0.52119	-1.3544
2.144	19.796	34.207	1503.3396	-1.5984	0.95435	-1.2146	0.701999999999998	49.619	41.7394	0.12598	-0.027344	-0.1377	-8.17100000000001	-19.582205	49.4348	0.1707	-0.033789	-0.20703	-84.102	-20.137	1467.6033	-1.5757	1.187	-1.0444	-30.92	49.2958	15.2547	0.15723	0.27539	-0.1543	-25.566	108.9149	120.722	-0.0058426	0.023702	-0.15337	-48.563	201.045	825.1074	-0.83984	0.50586	-1.3184
2.146	-29.211	39.512	1463.1508	-1.582	0.93555	-1.1855	-24.152	14.9686	41.9676	0.1123	-0.0068359	-0.16016	-54.501	17.3943	46.7965	0.15479	-0.032129	-0.22568	-40.287	36.7094	1445.12882	-1.5215	1.1445	-1.0215	-81.1863	68.0733	6.931	0.18262	0.27002	-0.14184	-46.049	52.544	99.8635	-0.00070758	0.014238	-0.15074	-74.2527	153.843	789.7998	-0.79268	0.49131	-1.2679
2.148	-36.161	33.4456	1477.6825	-1.5596	0.91602	-1.1543	7.708	16.8549	46.9342	0.10059	0.005371	-0.17285	-14.487	-33.971	84.8389	0.13564	-0.030176	-0.24795	-58.305	-5.776	1399.4519	-1.4782	1.112	-1.0085	-44.221	8.295	36.0622	0.20459	0.26074	-0.12988	-27.99	94.9232	101.7436	0.0026198	0.0036245	-0.14845	-54.754	179.0017	779.2104	-0.75332	0.47129	-1.223
2.15	-3.214	57.663	1452.506	-1.5503	0.90283	-1.1304	-15.137	70.1047	26.947	0.083984	0.021484	-0.19043	1.778	-19.1501	100.0455	0.11553	-0.026953	-0.26895	-31.746	-2.6401	1384.7275	-1.4395	1.084	-0.98828	-53.5613	54.4142	27.203	0.22852	0.24365	-0.11816	-50.172	74.897	96.3687	-0.0019531	-0.0063477	-0.1499	-103.1448	173.4121	743.4012	-0.71582	0.44942	-1.1738
2.152	-43.44896	2.419	1411.562	-1.5083	0.88721	-1.105	-12.608	13.159	15.1444	0.072266	0.044434	-0.2168	-51.076	-4.2395	93.58	0.084961	-0.023926	-0.29346	-23.392	40.3519	1340.525	-1.3857	1.0479	-0.9707	-84.9766	34.764	29.6256	0.23877	0.23682	-0.10986	-54.962	47.22068	115.564	-0.0028925	-0.0078125	-0.14527	-124.41	141.321	727.97	-0.67783	0.42979	-1.12
2.154	-9.863	-6.466	1416.024433	-1.4726	0.87207	-1.0898	-9.227	32.112	41.0754	0.0625	0.058594	-0.23389	-18.897	-42.2488	120.084	0.045215	-0.018652	-0.31387	-72.417	-6.41	1320.7574	-1.3608	1.0308	-0.95654	-48.403	2.3832	26.739	0.25537	0.22607	-0.09375	-27.096	98.238	104.8906	-0.011206	-0.0017212	-0.14633	-70.759	177.8244	686.7609	-0.64746	0.40625	-1.0684
2.156	-21.255	20.422	1376.3702	-1.4316	0.85742	-1.0762	-40.156	29.8975	29.6342	0.049316	0.075195	-0.25684	-23.862	8.506	133.699	-0.0023437	-0.021485	-0.33184	-29.286	34.193	1321.7417	-1.3052	0.99268	-0.93506	-79.3591	50.9958	19.509	0.26245	0.21508	-0.087891	-49.8754	45.1043	84.11118	-0.010356	0.0030315	-0.14124	-137.569	158.083	623.976	-0.61543	0.3877	-1.0164
2.158	-61.5299	-1.848	1360.7705	-1.3701	0.8418	-1.0625	-19.391	-24.546	36.392	0.040039	0.088868	-0.27222	-29.1367	8.3771	213.801	-0.0625	-0.021875	-0.35059	-53.297	39.354	1268.3362	-1.2578	0.95703	-0.92188	-68.507	9.044	42.291	0.27393	0.20361	-0.081055	-49.706	52.2813	106.688	-0.012145	0.018344	-0.14101	-83.794	160.5407	621.7007	-0.58603	0.36905	-0.95859
2.16	-27.402	53.2297	1354.0074	-1.3535	0.83008	-1.0498	-32.529	37.3356	20.466	0.032715	0.10059	-0.28955	15.959	2.0952	378.959	-0.1335	-0.019043	-0.37139	-40.732	26.475	1257.089	-1.2324	0.92969	-0.89844	-25.971	27.7454	35.7791	0.28662	0.19482	-0.073242	-44.613	70.3964	66.59	-0.0053711	0.035645	-0.13818	-75.9899	176.592	583.363	-0.55557	0.35654	-0.91016
2.162	-50.109	53.5834	1317.103	-1.3218	0.80518	-1.0269	-56.1801	3.2444	27.225155	0.013672	0.10693	-0.31543	-54.424	73.651	489.404	-0.20996	-0.032715	-0.41602	-22.719	120.485	1216.733	-1.189	0.89502	-0.86475	-56.026	59.5511	11.292	0.30176	0.19238	-0.074707	-61.796	17.479	60.3599	0.0064039	0.052969	-0.13882	-129.308	142.3595	557.6224	-0.52793	0.33487	-0.85683
2.164	-20.358	44.634	1307.7228	-1.2988	0.78564	-1.0141	-27.517	-10.1337	31.3652	0.00048828	0.11035	-0.33447	-11.442	37.403	606.656	-0.30088	-0.045118	-0.44228	-86.5766	121.818	1188.0463	-1.1655	0.86279	-0.83935	-29.06	-1.5874	28.6457	0.32471	0.19043	-0.064941	-53.446	68.3078	50.8957	0.018647	0.062182	-0.13364	-54.028	162.3871	528.88259	-0.50146	0.31494	-0.80615
2.166	25.9383	93.1904	1263.515	-1.2827	0.76807	-0.99951	-45.837	45.3572	9.751	-0.038086	0.099121	-0.36279	41.0601	34.3188	708.68	-0.40918	-0.066601	-0.49082	-81.5623	153.452	1182.925	-1.1387	0.83203	-0.81641	-31.504	47.761	18.93	0.33862	0.19019	-0.067871	-51.032	39.67058	24.9839	0.031389	0.078861	-0.12958	-59.244	150.7256	487.747	-0.47861	0.30498	-0.75655
2.168	-39.0155	79.9106	1227.383	-1.252	0.74414	-0.97852	-30.28	-17.8985	44.831	-0.10083	0.09375	-0.40161	-25.3648	62.94222	810.278	-0.55567	-0.087695	-0.53027	-53.733	184.212	1126.925	-1.103	0.7915	-0.78662	-34.969	24.9012	18.3501	0.35205	0.19043	-0.067383	-43.677	1.536	47.087	0.046176	0.085132	-0.11958	-73.867	130.616	470.43995	-0.45928	0.28789	-0.70899
2.17	-24.008	118.228	1240.031	-1.2324	0.73242	-0.9707	-44.867	13.76558	75.817	-0.17529	0.078125	-0.43652	23.3552	28.1081	918.48	-0.74219	-0.10664	-0.57793	-81.794	114.4141	1110.9684	-1.0898	0.77344	-0.77148	9.74299999999999	-16.9224	32.3429	0.37158	0.18652	-0.075195	-33.601	61.9449	28.505	0.0625	0.094238	-0.11426	-18.393	155.1676	430.523	-0.4378	0.27422	-0.65547
2.172	-36.916857	159.293	1186.0346	-1.189	0.71143	-0.9458	-76.0184	33.911	101.063	-0.29004	0.043457	-0.49902	16.6811	65.025	966.4558	-0.96582	-0.12793	-0.62549	-22.402	142.636	1083.65162	-1.0562	0.73291	-0.73975	-25.626	40.3313	6.075	0.375	0.18799	-0.081543	-41.171	13.42	3.883	0.081438	0.10005	-0.10055	-46.323	152.964	386.969	-0.4167	0.25986	-0.60323
2.174	-60.5379	119.906	1150.734	-1.1623	0.69263	-0.93042	-19.005	-7.3655	165.8816	-0.35645	0.015625	-0.54492	-23.4066	54.9615	981.0511	-1.2272	-0.129	-0.65235	-37.386	133.926	1046.44724	-1.0322	0.70361	-0.71826	-20.027	-6.8702	26.2295	0.38428	0.19043	-0.096191	-41.291	23.652	28.197	0.10199	0.096455	-0.096884	-15.887	152.668	387.0234	-0.39648	0.25	-0.56055
2.176	13.937	155.897	1110.8591	-1.1289	0.67285	-0.91211	-20.045	53.8226	196.054	-0.51611	-0.035645	-0.64404	2.298	-5.655	1014.484	-1.5167	-0.1042	-0.69795	-50.609	108.9607	1029.636	-1.0078	0.6748	-0.69629	-7.071	30.914	32.2332	0.38355	0.19116	-0.10767	-37.49	44.0252	29.91	0.11922	0.091202	-0.08945	6.093	170.689	366.2956	-0.36533	0.23027	-0.51064
2.178	3.779	150.21	1070.002	-1.0933	0.64697	-0.88232	-9.9892	28.229	301.074	-0.67651	-0.067871	-0.72265	-3.156	-1.33	1022.069	-1.8078	-0.042481	-0.75615	-31.044	166.5363	968.0037	-0.9707	0.63867	-0.66895	-30.848	72.307	13.6514	0.37744	0.1958	-0.12402	-53.481	-12.7976	26.56449	0.14126	0.084567	-0.082818	-38.469	129.7149	352.7939	-0.33672	0.22226	-0.46357
2.18	38.192	133.9063	1053.1331	-1.0703	0.62891	-0.875	20.6626	25.3506	465.159	-0.87451	-0.098145	-0.80713	-16.559	-66.805	1029.161	-2.0682	0.066895	-0.84004	-47.26	137.136	917.9588	-0.94873	0.61865	-0.65771	14.891	13.4893	23.80114	0.36523	0.20557	-0.13721	-38.996	34.85503	21.2764	0.15234	0.069824	-0.068848	11.827	138.033	339.3821	-0.30273	0.21093	-0.41943
2.182	45.779	166.775	1022.004	-1.0313	0.60303	-0.84766	-3.0196	87.894	596.18	-1.2046	-0.075195	-0.90967	-21.798	-43.975	1052.2908	-2.2637	0.21924	-0.94336	-24.511	139.274	874.3264	-0.91064	0.59473	-0.62842	-14.238	62.484	-2.998	0.35742	0.21631	-0.15039	-44.536	28.2916	8.77	0.16801	0.058056	-0.066316	-13.88	155.272	308.3864	-0.26709	0.19912	-0.37998
2.184	-12.9105	133.477	982.8725	-0.99706	0.58228	-0.82373	41.773	51.6379	769.269	-1.3984	-0.044922	-0.96484	-40.2	-2.393	1060.346	-2.345	0.42412	-1.0403	-22.746	167.0827	831.854	-0.87793	0.57519	-0.60791	-30.841	29.655	8.748	0.34473	0.23975	-0.17383	-35.028	14.8129	15.57865	0.17738	0.042805	-0.061778	-17.407	127.2582	324.0101	-0.23047	0.18701	-0.34131
2.186	37.34681	130.603	966.5259	-0.9585	0.55811	-0.80029	66.66	64.988	921.455	-1.8257	0.08252	-1.0854	-13.22	-55.8407	1097.0135	-2.3249	0.671	-1.1311	-37.752	130.592	842.17258	-0.8418	0.55078	-0.58643	1.28400000000001	-3.12728	20.2446	0.33398	0.26465	-0.18897	-26.036	70.912	11.68	0.18989	0.021695	-0.048086	28.161	130.569	296.5283	-0.19883	0.16817	-0.30019
2.188	43.3207	155.3704	910.191	-0.90625	0.52002	-0.7793	21.8252	48.839	1048.5	-2.1541	0.26465	-1.1756	-9.142	-21.7294	1101.0288	-2.2483	0.97724	-1.2124	2.12	162.00215	851.016	-0.78467	0.52002	-0.56592	-31.544	58.627	1.338	0.32422	0.29004	-0.21387	-46.47	28.6511	-15.411	0.1921	0.0019281	-0.045791	-33.714	105.8296	253.936	-0.16748	0.15137	-0.26035
2.19	8.986	132.4511	891.3339	-0.87061	0.50391	-0.76123	30.38312	-16.607	1196.7236	-2.4492	0.5166	-1.2617	-7.346	-56.317	1099.622	-2.1643	1.2341	-1.3191	-38.6986	168.58	791.8334	-0.75488	0.50391	-0.55127	-30.381	20.0256	7.0801	0.31982	0.31396	-0.23584	-19.333	35.9669	11.8594	0.19678	-0.018555	-0.036621	-4.15900000000001	89.566	243.948	-0.13975	0.13301	-0.22598
2.192	56.3522	174.834	867.3216	-0.81445	0.4668	-0.73047	29.6217	16.708	1233.5678	-2.707	0.95898	-1.3691	21.629	-75.088	1136.174	-2.0176	1.3516	-1.4512	-18.729	152.4456	746.694	-0.69434	0.47461	-0.52637	-30.444	25.383	17.573	0.31152	0.32617	-0.25342	-20.857	59.8044	9.314	0.19522	-0.040318	-0.030084	-20.203	115.342	222.787	-0.1169	0.12041	-0.18897
2.194	-8.493	185.003	829.6611	-0.76538	0.43725	-0.70385	40.5754	-12.855	1257.612	-2.7559	1.207	-1.4199	-63.898	-13.033	1179.927	-1.6758	1.2961	-1.4883	23.984	201.944	693.2388	-0.64648	0.44775	-0.50098	-56.737	62.63	3.391	0.29834	0.3501	-0.28564	-34.511	4.82	18.7817	0.19249	-0.058855	-0.026746	-45.596	97.852	225.2719	-0.10059	0.10254	-0.15137
2.196	-4.4215	172.5784	822.7228	-0.71826	0.40479	-0.67236	34.7073	-54.342	1329.824	-2.7476	1.6743	-1.5796	-85.08	-30.663	1223.472	-1.2495	1.1556	-1.4354	-26.942	194.891	659.3911	-0.60303	0.41846	-0.48535	-23.637	16.285423	27.669	0.28076	0.36743	-0.31201	-22.239	49.1242	22.7583	0.1956	-0.081919	-0.022478	-18.347	95.9063	198.0115	-0.080371	0.090918	-0.12519
2.198	47.011	196.282	777.29756	-0.66162	0.35889	-0.64014	-8.808	-40.1095	1367.622	-2.5581	1.8814	-1.7222	-58.942	-29.35	1209.027	-0.91514	0.97433	-1.3659	2.827	191.979	650.6747	-0.54102	0.38281	-0.45703	-61.025	69.85	10.832	0.25977	0.38086	-0.33594	-28.663	53.836	-0.738999999999997	0.19619	-0.093062	-0.016603	-72.243	104.573	163.616	-0.062598	0.08584	-0.095312
2.2	-5.7301	160.00687	734.2071	-0.63086	0.33496	-0.62109	-25.198	-106.458	1383.974	-2.166	1.9307	-1.7871	-93.9296	-82.143	1166.538	-0.74668	0.77949	-1.3237	15.706	193.146	601.773	-0.51563	0.36426	-0.43848	-63.9333	55.125	12.6129633	0.22559	0.40576	-0.37061	-40.961	34.5702	20.1203	0.1958	-0.104	-0.01123	-66.838	92.9351	172.8934	-0.040332	0.077637	-0.06875
2.202	28.496	154.63044	708.0617	-0.57422	0.29053	-0.58691	-36.546	-80.5843	1398.09	-1.3652	1.7168	-1.6816	-50.528	-198.565	1191.4699	-0.69043	0.61914	-1.3164	-28.315	124.997	565.9489	-0.46045	0.32373	-0.40967	-44.151	8.5326	42.537	0.20654	0.41211	-0.39258	-24.785	80.619	23.577	0.18721	-0.10586	-0.012402	-31.463	122.048	175.18	-0.016211	0.075098	-0.047168
2.204	18.203	184.736	658.326	-0.5315	0.25708	-0.55933	-51.818	-75.2068	1400.0586	-0.9873	1.5352	-1.6035	-64.157	-202.176	1211.64201	-0.66963	0.50048	-1.2936	14.548	126.428	551.5845	-0.41797	0.29614	-0.39184	-63.3093	45.3381	24.0048	0.16016	0.43408	-0.42236	-37.486	38.411	20.7449	0.18672	-0.10654	-0.010544	-96.204	121.9287	153.578	0.00097656	0.071777	-0.023926
2.206	-9.702	173.992	635.59885	-0.48828	0.22363	-0.53516	-27.598	-110.155	1411.958	-0.49805	1.1367	-1.4863	-114.445	-212.316	1232.5673	-0.65547	0.4042	-1.2633	-11.037	133.202	494.048	-0.38037	0.26514	-0.37646	-41.443	-15.7567	35.73689	0.11768	0.46045	-0.44385	-46.094	38.762	36.69	0.18594	-0.10654	-0.0035146	-65.4755	102.94056	147.9808	0.024805	0.070899	-0.0058592
2.208	26.9055	193.4550669	621.2262	-0.43457	0.18506	-0.50684	-46.91	-71.189	1400.3532	-0.37378	0.87915	-1.4295	-58.945	-191.563	1256.499	-0.64687	0.33077	-1.2508	-14.242	140.644	466.5782	-0.32764	0.2334	-0.33545	-62.42	-12.3922	69.3646	0.065918	0.48096	-0.47217	-28.841	65.75	15.53	0.17949	-0.10029	-0.00019449	-63.1097	117.51	114.369	0.046582	0.072168	0.01123
2.21	-11.2871	185.6327	563.6776	-0.40771	0.16748	-0.49121	-79.864	-79.8186	1388.8527	-0.35693	0.6958	-1.4058	-55.457	-160.082	1236.45	-0.65098	0.29473	-1.2574	7.88	194.036	436.857	-0.30127	0.20947	-0.32959	-73.0939	48.5416	79.1764	-0.0097656	0.49463	-0.52295	-58.0813	15.1775	30.5435	0.18066	-0.095703	0.0048828	-114.522	104.49352	92.1154	0.067285	0.071387	0.028027
2.212	-9.765	155.895	540.8913	-0.35938	0.13281	-0.46875	-91.639	-50.584	1453.867	-0.38232	0.57373	-1.3843	-39.309	-219.872	1268.0487	-0.66016	0.29492	-1.2813	-53.828	160.957	423.5393	-0.26172	0.17773	-0.30127	-39.663	18.5881	130.0746	-0.050781	0.49023	-0.55762	-22.398	52.54419	43.64832	0.17285	-0.0917	0.0035156	-57.954	96.1037	92.0899	0.09092	0.069043	0.037012
2.214	-14.85	188.5304	529.4653	-0.31958	0.11181	-0.44532	-168.424	49.869	1490.719	-0.4082	0.5332	-1.376	-5.338	-220.473	1323.9414	-0.67441	0.31426	-1.3174	-23.246	144.756	428.671	-0.22729	0.14892	-0.28784	-52.12	72.34	216.016	-0.15527	0.48486	-0.60498	-30.355	45.0266	14.015	0.17461	-0.081348	0.0024411	-84.3858	109.139	47.848	0.11523	0.066895	0.052246
2.216	-58.0687	179.4945	518.974609	-0.28369	0.086914	-0.4248	-169.7876	45.727	1477.945	-0.47363	0.49414	-1.377	-50.284	-186.349	1364.879	-0.69649	0.35567	-1.3465	-26.375	149.648	412.5509	-0.18799	0.12939	-0.26611	-88.5736	60.3266	324.066	-0.2793	0.47802	-0.63819	-48.793	19.1687	29.5003	0.17383	-0.072365	0.0032228	-97.248	76.3876	68.278	0.13281	0.067578	0.053223
2.218	-16.29	167.347	504.086	-0.24414	0.054688	-0.40039	-165.9116	43.453	1428.921	-0.51611	0.47559	-1.393	-40.808	-167.257	1415.507	-0.75586	0.38848	-1.3684	-60.4634	131.1824	380.7561	-0.14893	0.1001	-0.24658	-55.302	25.3003	468.709	-0.44971	0.47559	-0.67285	-22.796	72.175	43.5223	0.18369	-0.066993	0.0074222	-47.732	82.303	80.995	0.1583	0.067188	0.057422
2.22	-50.971	180.724	449.98536	-0.22461	0.04834	-0.38623	-204.542	-27.96	1392.028	-0.54004	0.46143	-1.3979	-40.3226	-79.922	1409.279	-0.86075	0.40742	-1.3885	-30.662	141.177	367.0289	-0.12646	0.088867	-0.23389	-43.081	67.8376	611.709	-0.76904	0.49951	-0.729	-43.187	38.077	27.7978	0.19092	-0.061523	0.0014648	-64.3242	77.251169	62.065	0.17353	0.064453	0.062109
2.222	-66.8957	150.7	433.1075	-0.18262	0.023926	-0.37207	-169.967	-121.611	1416.585	-0.54785	0.43994	-1.3926	-45.5955	-65.33	1379.147	-1.0039	0.41992	-1.4023	-66.6203	129.541	319.9737	-0.086426	0.062988	-0.22705	-40.92	51.5146	792.261	-0.96484	0.51563	-0.76758	-20.45	41.5545	63.553	0.19375	-0.056543	-0.0035157	-31.5	62.4227	87.7808	0.19082	0.070996	0.064355
[truncated: 11,888 more rows]
