# Supplementary material for: Reliability and Validity of Running Cadence and Stance Time Derived from Instrumented Wireless Earbuds
Source: Sensors (Basel). 2021 Nov 30;21(23):7995. doi: 10.3390/s21237995 (PMC8659722; doi:10.3390/s21237995)
Supplement: Supplementary file 1 [file sensors-21-07995-s001.zip › Data_P12_speeds_1.csv]

time	S7kmh_force_plate_1	S7kmh_force_plate_2	S7kmh_force_plate_3	S7kmh_earbuds_1	S7kmh_earbuds_2	S7kmh_earbuds_3	S10kmh_force_plate_1	S10kmh_force_plate_2	S10kmh_force_plate_3	S10kmh_earbuds_1	S10kmh_earbuds_2	S10kmh_earbuds_3	S13kmh_force_plate_1	S13kmh_force_plate_2	S13kmh_force_plate_3	S13kmh_earbuds_1	S13kmh_earbuds_2	S13kmh_earbuds_3	max_force_plate_1	max_force_plate_2	max_force_plate_3	max_earbuds_1	max_earbuds_2	max_earbuds_3
0	42.755	-61.44	829.54	-0.2749	0.52197	-1.3188	-65.1303	-78.627	1087.6954386	-1.5273	1.3848	-1.291	32.5005	72.5043	587.468	-0.80468	0.19287	-0.7207	-30.48	61.649	76.385	-0.2416	0.13418	-0.36426
0.002	33.466	-65.359	823.429	-0.26006	0.52198	-1.2929	-78.396	-76.5058	1134.698	-1.2339	1.2104	-1.2065	47.796	76.5163	665.387	-1.0117	0.25586	-0.78906	-35.0959	75.984	76.1719	-0.23438	0.12744	-0.34473
0.004	34.134	-83.586	835.492	-0.24913	0.51768	-1.2691	-56.968	-67.178	1171.648	-1.0644	1.0732	-1.1885	42.353	68.752	781.3072	-1.3008	0.35742	-0.88281	-37.0763	57.615	67.93	-0.23379	0.12891	-0.32012
0.006	8.79199999999999	-87.387	827.966	-0.2382	0.51339	-1.246	-37.403	-89.872	1185.3596	-0.91748	0.93408	-1.1577	15.0188	66.142	846.825267	-1.4453	0.43311	-0.94531	-63.3092	64.7425	69.2824	-0.2335	0.12021	-0.30927
0.008	20.981	-64.788	785.769	-0.22569	0.50918	-1.2198	-24.995	-95.15	1199.923	-0.77246	0.79102	-1.1406	-19.5258	51.1449	903.3407	-1.6753	0.62549	-1.0874	-69.157	57.4058	53.0078	-0.22842	0.11357	-0.2792
0.01	20.84	-34.275	748.989	-0.21436	0.50586	-1.1934	-22.324	-77.645	1219.876	-0.71582	0.75977	-1.1406	-17.5327	19.424	951.838	-1.7554	0.75977	-1.1597	-96.819	36.4318	22.049	-0.22578	0.099513	-0.2545
0.012	11.471	-9.295	715.879	-0.20381	0.50029	-1.161	-60.469	-16.458	1253.911	-0.66406	0.72949	-1.1543	-11.0574	-5.204	979.576	-1.7832	0.94531	-1.2324	-28.10124	14.882	16.153	-0.21436	0.083496	-0.23828
0.014	10.387	3.442	690.214	-0.20068	0.49385	-1.1335	-96.4434	26.906	1282.3823	-0.63868	0.70777	-1.1587	-41.304	-22.283	1016.321	-1.7358	1.2524	-1.3394	-42.1998	-7.18886	-16.7842	-0.19717	0.087988	-0.24209
0.016	3.065	5.596	667.516	-0.19638	0.48994	-1.0995	-83.16	21.511	1264.383	-0.63477	0.68359	-1.1572	-56.464	-44.0539	1054.8492	-1.7046	1.3657	-1.396	-17.3065	5.514	-3.136	-0.17891	0.035058	-0.19053
0.018	2.81	19.141	645.043	-0.18399	0.48105	-1.0643	-72.5219	-50.812	1222.655	-0.64453	0.65332	-1.1602	-33.86	-53.822	1090.193	-1.5566	1.4941	-1.5078	-32.937	19.847	17.291	-0.15899	-0.0086914	-0.12686
0.02	14.152	12.842	635.682	-0.1748	0.46338	-1.0269	-68.639	-132.132	1207.357	-0.66699	0.64063	-1.1543	-33.347	-38.6	1108.736	-1.3376	1.4099	-1.5032	-46.214	35.7321	21.984	-0.15127	-0.013965	-0.10781
0.022	22.746	11.719	615.65	-0.16006	0.45049	-0.9958	-60.2285	-183.999	1206.249	-0.72559	0.62109	-1.1641	-14.96	-39.987	1162.594	-1.0703	1.2246	-1.4297	-17.705	30.762	35.803	-0.14648	-0.0048828	-0.11133
0.024	24.038	15.048	588.029	-0.14707	0.44043	-0.96241	-35.923	-179.009	1229.716	-0.80517	0.61425	-1.1748	4.618	-48.269	1177.709	-0.79932	0.99463	-1.3315	18.05162	32.991	41.022	-0.12432	-0.019531	-0.085448
0.026	7.72099999999999	27.984	554.719	-0.13965	0.4334	-0.93154	-27.63	-153.556	1259.621	-0.91357	0.61182	-1.1909	-6.291	-44.4378	1207.073	-0.71191	0.93555	-1.3164	21.502	38.345	34.359	-0.090137	-0.040137	-0.039062
0.028	-1.642	24.073	520.999	-0.12773	0.42012	-0.8959	-7.359	-153.0693	1274.8738	-1.0581	0.625	-1.2144	-29.442	-24.682	1244.263	-0.64746	0.86963	-1.3179	4.146	60.705	31.5166	-0.051465	-0.037402	-0.028906
0.03	-8.563	24.715	510.206	-0.11475	0.4082	-0.86035	39.4229	-186.978	1280.1471	-1.1299	0.63477	-1.2344	-37.873	7.69	1281.459	-0.61157	0.80884	-1.3083	-18.068	54.349	33.8799	-0.014258	-0.052344	-0.0080076
0.032	5.469	17.56	507.551	-0.10098	0.39297	-0.82793	51	-217.592	1306.86231	-1.272	0.70752	-1.2905	-57.739	40.669	1257.6314	-0.58105	0.74414	-1.3027	-32.129	29.2056	6.442	0.036133	-0.061523	0.020508
0.034	6.042	24.6628	500.675	-0.084961	0.37637	-0.79434	15.606	-206.247	1360.9508	-1.3592	0.77808	-1.3464	-71.3702	19.908	1238.671	-0.52881	0.69189	-1.2905	12.651	1.1449	-3.8638	0.079004	-0.06914	0.024512
0.036	2.409	22.9517	483.441	-0.074024	0.3623	-0.7627	-24.1638	-178.951	1386.267	-1.4175	0.84424	-1.4058	-62.9268	-42.427	1220.984	-0.5127	0.66797	-1.2871	25.304	-12.6212	-20.3804	0.12304	-0.082715	0.029004
0.038	3.5	27.6444	466.722	-0.064356	0.34541	-0.73017	-16.2923	-151.448	1367.544	-1.4395	0.90137	-1.4746	-49.7354	-94.7189	1239.013	-0.49561	0.63916	-1.2905	37.1905	17.6501	2.0119	0.17617	-0.1081	0.058692
0.04	-5.392	29.4463	436.423	-0.055176	0.32959	-0.69189	-4.114	-128.841	1327.0269	-1.4473	0.92188	-1.5117	-50.0223	-113.229	1304.9741	-0.47851	0.61157	-1.2908	-11.989	14.0401	16.8233	0.23271	-0.14687	0.095899
0.042	-23.629	25.8765	438.43	-0.043555	0.3166	-0.66758	3.1281	-139.683	1288.779	-1.4526	0.96143	-1.5757	-36.961	-121.89	1357.177	-0.48193	0.59033	-1.2983	-13.5417	20.97466	44.386	0.27197	-0.14551	0.084961
0.044	1.709	31.1099	414.212	-0.033789	0.30283	-0.63515	-6.2093	-173.258	1283.9	-1.459	0.97558	-1.6123	-2.031	-125.647	1337.979	-0.53467	0.58643	-1.3179	-20.6607	2.8921	44.9694	0.28477	-0.13535	0.05918
0.046	14.373	37.1226	391.164	-0.025586	0.29111	-0.60976	1.5388	-188.1119	1322.584	-1.4805	0.99414	-1.6533	3.971	-137.386	1320.36	-0.58789	0.59766	-1.3301	1.8779	9.45	37.7496	0.33906	-0.2	0.10264
0.048	-1.254	45.293	372.212	-0.016407	0.27715	-0.58125	16.9259	-156.4779	1367.3241	-1.5313	1.0195	-1.6992	10.879	-145.503	1307.347	-0.72461	0.62598	-1.3672	5.55	19.14	31.531	0.37773	-0.2332	0.1417
0.05	-0.569000000000003	51.178	363.719	-0.0092773	0.26709	-0.55518	48.379	-130.0029	1383.7868	-1.5542	1.022	-1.7134	-2.84	-138.526	1346.324	-0.82666	0.65918	-1.4019	-29.3577	36.754	24.066	0.39991	-0.23682	0.11553
0.052	-8.64100000000001	52.649	348.373	-0.0041015	0.25674	-0.52784	67.9153	-123.2383	1372.683	-1.5996	1.0273	-1.7422	23.2901	-129.639	1371.475	-0.91211	0.70947	-1.4473	-43.6806	24.687	23.7663	0.4165	-0.25537	0.1001
0.054	10.664	65.966	331.087	-0.0011719	0.24649	-0.5045	63.889	-126.3839	1374.341	-1.6199	1.033	-1.7605	-12.516	-130.1673	1411.946	-0.98584	0.79346	-1.5249	-61.914	11.8985	9.514	0.44414	-0.29902	0.11719
0.056	-21.201	60.65	317.01	0.003125	0.24062	-0.48262	48.277	-125.5132	1390.5761	-1.6323	1.0337	-1.7778	-10.4421	-112.4895	1405.066	-1.0049	0.83594	-1.5605	-43.417	7.247	16.1065	0.45703	-0.31924	0.11143
0.058	-22.514	51.914	328.211	0.0038086	0.2333	-0.45937	21.5049	-123.96343	1409.714	-1.6094	1.0195	-1.7949	-20.91522	-110.703	1382.4004	-1.0151	0.91357	-1.6401	-52.9397	3.786	-3.959	0.46172	-0.32471	0.086035
0.06	-8.821	49.609	310.666	0.0078125	0.21875	-0.4375	40.0599	-105.9072	1447.762	-1.5776	0.99656	-1.7993	-18.05841	-106.192	1372.359	-1.0073	0.94189	-1.6968	-33.2384	35.808	21.1605	0.45918	-0.33184	0.068847
0.062	2.64599999999999	54.98	296.018	9.7683e-05	0.21308	-0.4124	8.3542	-101.532	1456.214	-1.5366	0.97119	-1.7983	-11.951	-98.475	1376.307	-0.99561	0.94971	-1.7437	-71.1448	33.7842	2.771	0.45313	-0.31836	0.039063
0.064	-0.198	63.638	290.337	-0.0050781	0.21093	-0.39238	17.009	-110.387	1452.275	-1.479	0.94385	-1.8062	22.1973	-81.646	1367.654	-0.97656	0.94336	-1.8008	-77.941	48.7377	4.535	0.45586	-0.34189	0.054785
0.066	-22.705	61.813	290.114	-0.0074219	0.20352	-0.37402	24.1278	-120.985	1424.589	-1.4526	0.9292	-1.8042	36.547	-83.378	1376.25	-0.97412	0.9458	-1.8335	-51.5932	47.775	9.85	0.44541	-0.31865	0.034375
0.068	-16.283	51.889	276.85	-0.0079103	0.18984	-0.3498	36.04	-113.7974	1417.111	-1.4019	0.90869	-1.8022	35.2997	-79.134	1391.396	-0.97412	0.95947	-1.8999	-47.037	35.422	24.075	0.42627	-0.30029	0.0089843
0.07	-15.328	48.542	270.386	-0.0078125	0.18213	-0.32861	43.013	-101.876	1402.3934	-1.3777	0.90161	-1.7883	49.031	-81.48907	1399.058	-0.97754	0.97363	-1.9423	-12.668	40.4792	21.126	0.40439	-0.27549	-0.014258
0.072	-17.667	43.733	282.485	-0.011133	0.17129	-0.30381	64.807	-90.754	1387.0559	-1.3672	0.88672	-1.7773	59.838	-87.993	1433.5806	-0.97998	0.98877	-1.9722	-36.41961	25.0922	36.475	0.38867	-0.24707	-0.035645
0.074	-11.924	36.397	271.491	-0.010742	0.16797	-0.28848	56.767	-64.3344	1367.6731	-1.3623	0.86523	-1.7598	63.999	-88.358	1449.604	-0.98047	1.0195	-2.0039	-19.815	20.1281	22.6593	0.36992	-0.22441	-0.055859
0.076	6.528	37.657	267.291	-0.012305	0.15976	-0.27597	41.5928	-48.3833	1375.714	-1.3608	0.85303	-1.7515	46.61	-67.01	1433.303	-0.98193	1.0278	-2.0073	-32.50923	24.3744	15.598	0.35088	-0.19863	-0.075586
0.078	-10.283	45.03	244.003	-0.012305	0.15586	-0.25625	60.193	-47.7113	1383.68348	-1.3472	0.82471	-1.7397	46.916	-58.1647	1438.0577	-0.97461	1.0352	-2.0254	-4.9792	35.577	19.8947	0.33252	-0.17871	-0.092383
0.08	-32.145	46.663	218.534	-0.013184	0.15234	-0.24463	52.544	-15.1165	1352.1686	-1.3255	0.80591	-1.7302	21.2945	-60.163	1451.145	-0.96484	1.0249	-2.0288	-10.527	26.8871	12.6673	0.30937	-0.1539	-0.11611
0.082	-35.22	44.503	225.491	-0.009668	0.14688	-0.22509	43.264	7.3141	1325.6727	-1.2905	0.79541	-1.7095	47.436	-65.934	1445.0927	-0.94971	1.0063	-2.0327	-1.644	35.422	23.1721	0.28174	-0.13574	-0.13525
0.084	-24.023	52.477	225.771	-0.011328	0.14131	-0.20928	13.754	18.248	1308.1611	-1.2373	0.79102	-1.6934	63.818	-72.836	1456.971	-0.93896	0.97314	-2.0229	-18.326	-0.147000000000002	28.9022	0.25361	-0.11973	-0.16084
0.086	-22.125	65.156	224.464	-0.011719	0.13819	-0.20381	-7.208	15.6	1292.4324	-1.207	0.79297	-1.6855	54.215	-63.9264	1408.0225	-0.93164	0.95313	-2.0195	-4.4361	16.947	25.7406	0.22441	-0.11055	-0.18398
0.088	-24.36	65.18	238.442	-0.0094725	0.13184	-0.19053	-4.6268	-8.924	1296.633	-1.1543	0.79102	-1.6523	54.184	-52.469	1370.149	-0.91406	0.91602	-2.0078	18.975	16.8271	17.629	0.19746	-0.10039	-0.20313
0.09	-20.491	69.479	223.564	-0.011719	0.12744	-0.17871	21.6606	-39.339	1283.9662	-1.1221	0.79249	-1.625	60.155	-27.3152	1352.246	-0.9021	0.88745	-1.9988	28.2096	30.063	37.09	0.17441	-0.093164	-0.22481
0.092	-25.538	79.532	216.465	-0.012207	0.12861	-0.17256	23.291	-57.858	1245.47869	-1.0972	0.79346	-1.5972	28.988	7.038	1345.2574	-0.89063	0.86914	-1.9902	2.058	30.4206	33.3857	0.15527	-0.092773	-0.24463
0.094	-21.294	88.209	217.021	-0.019727	0.12588	-0.1623	9.276	-48.315	1214.353	-1.0796	0.78564	-1.5522	54.227	29.9954	1346.4531	-0.87549	0.8501	-1.9897	5.0425	26.3892	39.989	0.13506	-0.090137	-0.26582
0.096	-21.643	73.006	225.655	-0.020898	0.12432	-0.15645	4.75566	-32.7054	1193.684	-1.0674	0.77637	-1.5293	85.28	21.2252	1341.272	-0.85303	0.84228	-1.9799	20.3987	17.0154	22.6033	0.11446	-0.09043	-0.29561
0.098	-9.961	58.679	224.998	-0.02334	0.1292	-0.15429	-16.843	-1.018	1188.1197	-1.0522	0.76904	-1.478	47.449	23.0366	1328.76	-0.83594	0.83789	-1.9727	-13.192	6.8726	20.0617	0.09414	-0.08418	-0.31826
0.1	-16.35	61.987	227.753	-0.027344	0.12695	-0.15088	-6.865	33.58	1191.601	-1.0393	0.75708	-1.4436	35.0357	35.2774	1295.4458	-0.80615	0.83447	-1.9526	2.127	7.696	24.2433	0.072559	-0.081836	-0.34473
0.102	-34.939	59.507	239.54	-0.030664	0.12851	-0.14131	10.664	39.4173	1182.94	-1.0117	0.74609	-1.4023	21.0677	50.667	1270.73	-0.78955	0.83643	-1.9429	-38.2171	17.6709	17.1815	0.043457	-0.080566	-0.37109
0.104	-25.338	58.188	246.635	-0.033789	0.13008	-0.13848	8.8126	43.6493	1158.426	-0.98193	0.729	-1.3511	-4.273	58.811	1251.2264	-0.76563	0.83008	-1.918	-24.2168	40.21	5.4309	0.012695	-0.064844	-0.39775
0.106	-15.843	55.187	255.05	-0.036133	0.13086	-0.13887	-29.978	55.522	1122.3203	-0.96436	0.71729	-1.3276	-12.5295	56.56	1234.2398	-0.74047	0.82202	-1.8938	-47.1197	13.5706	-7.548	-0.023438	-0.050781	-0.41943
0.108	-20.388	73.439	241.393	-0.040918	0.13174	-0.14209	-24.1913	65.939	1103.897	-0.92334	0.70361	-1.271	32.1318	29.5811	1211.7662	-0.7168	0.8125	-1.8711	-49.3075	5.989	8.69265	-0.061328	-0.028125	-0.43467
0.11	-30.764	69.289	245.925	-0.045898	0.12842	-0.14111	-59.78	84.125	1091.1562	-0.89477	0.68897	-1.2283	-8.1757	33.179	1200.0214	-0.68701	0.7915	-1.8315	-44.8513	-7.9153	17.58826	-0.10098	-0.0070311	-0.45752
0.112	-25.197	68.038	269.586	-0.050293	0.13301	-0.14531	-31.6662	73.2612	1063.8866	-0.8667	0.67822	-1.1851	-17.7043	37.56	1165.2097	-0.67285	0.78564	-1.8003	-16.2466	15.504	46.696	-0.13672	0.011719	-0.47949
0.114	2.854	56.331	289.929	-0.054493	0.13623	-0.15351	-15.1578	60.557	1023.9747	-0.83203	0.65918	-1.1279	-6.3548	51.082	1174.265	-0.65479	0.76611	-1.7534	-41.0692	32.4649	37.0936	-0.1833	0.053125	-0.52588
0.116	-20.447	67.378	281.539	-0.056445	0.14912	-0.1668	-12.625	49.51993	978.925	-0.81543	0.65088	-1.0952	-14.892	68.474	1178.319	-0.63892	0.74463	-1.7078	-81.64	24.03	27.3424	-0.20987	0.065235	-0.54024
0.118	-11.801	65.587	280.656	-0.061035	0.16445	-0.17969	-42.047	58.2348	947.9139	-0.77637	0.63379	-1.0449	-1.162	92.2591	1144.417	-0.62646	0.72705	-1.6694	-42.50287	28.608	-3.215	-0.22549	0.082422	-0.5543
0.12	-15.231	63.242	281.023	-0.064941	0.1748	-0.18164	-22.141	73.185	921.1853	-0.74804	0.61206	-0.99391	21.6264	85.8559	1103.3703	-0.61572	0.70752	-1.6147	-55.245	19.589	-1.607	-0.2499	0.10645	-0.59443
0.122	-5.731	74.87	279.971	-0.071582	0.18115	-0.19717	-28.164	76.7332	907.4315	-0.71387	0.58936	-0.9502	12.837	88.54427	1087.0283	-0.6167	0.69385	-1.5894	-19.967	21.067	36.039	-0.27246	0.10547	-0.62061
0.124	-14.17	83.974	286.118	-0.080664	0.19189	-0.20625	-20.652	67.475	882.3094	-0.67969	0.57617	-0.89844	-35.8238	117.56	1061.72447	-0.6001	0.67773	-1.5313	-57.1964	3.213	83.806	-0.29961	0.095704	-0.64014
0.126	-25.914	78.756	304.911	-0.096289	0.19775	-0.21016	-24.55	47.324	850.7084	-0.65967	0.56299	-0.86865	-5.898	142.023	1060.282	-0.59082	0.66211	-1.4892	-45.571	13.1111	143.929	-0.3538	0.088672	-0.67138
0.128	-23.058	73.26	323.726	-0.11055	0.19776	-0.21689	-33.1362	49.324	823.268	-0.60889	0.52441	-0.78906	-38.733	141.591	1036.066	-0.57764	0.65186	-1.4487	2.9378	4.99	198.625	-0.43232	0.070313	-0.70928
0.13	-19.917	61.722	321.099	-0.12109	0.20215	-0.22168	-43.9906	78.8059	808.9588	-0.57788	0.50489	-0.75416	-47.0411	133.072	979.1943	-0.55615	0.64014	-1.3901	21.148	17.5399	321.365	-0.53691	0.043067	-0.7541
0.132	-11.49	64.648	324.935	-0.13721	0.20401	-0.23428	-25.741	99.677	796.228	-0.54395	0.49316	-0.71973	-6.021	102.2208	958.326	-0.54102	0.63574	-1.3652	32.3654	12.914	470.362	-0.67334	0.016113	-0.81982
0.134	-20.2	64.503	340.594	-0.14287	0.20332	-0.24453	-30.542	100.581	760.0298	-0.4873	0.46045	-0.65283	-0.800999999999998	94.816	914.542	-0.51807	0.62158	-1.3101	80.409	37.33	664.461	-0.86504	0.026172	-0.90625
0.136	-11.341	64.727	352.629	-0.14873	0.20528	-0.25235	-37.011	90.034	710.631	-0.46143	0.45215	-0.62939	-24.519	116.2186	894.3368	-0.49487	0.60328	-1.2605	72.413	58.962	858.625	-1.0824	0.017773	-0.97149
0.138	0.919999999999995	72.559	358.29	-0.14951	0.20888	-0.26387	-33.7058	80.484	674.9904	-0.40039	0.4082	-0.56689	0.801000000000002	120.1307	882.78611	-0.47607	0.58447	-1.2144	22.7202	52.573	1068.728	-1.3343	0.058789	-1.05
0.14	-3.214	74.176	357.331	-0.15137	0.21289	-0.27637	-34.6028	73.6304	640.9542	-0.35376	0.39233	-0.52734	-17.169	113.3902	851.9465	-0.45313	0.5625	-1.1563	61.962	40.38	1244.415	-1.6402	0.15362	-1.1841
0.142	-32.035	58.002	399.086	-0.14746	0.21338	-0.28916	-33.014493	74.034	617.0612	-0.30615	0.36182	-0.48584	-32.54	124.8222	798.826	-0.44531	0.55322	-1.1245	80.086	24.939	1382.8051	-1.9238	0.25977	-1.2871
0.144	-9.591	59.51	402.131	-0.15127	0.2125	-0.29737	-24.9964	91.589	594.512	-0.2417	0.32373	-0.43115	6.091	116.4285	793.1718	-0.42725	0.52686	-1.0605	99.056	31.452	1469.65	-2.1749	0.42939	-1.3882
0.146	0.161999999999999	64.09	397.033	-0.15127	0.21718	-0.31611	-33.63952	96.332	548.633	-0.21533	0.31592	-0.41064	-13.174	130.6169	780.377205	-0.42212	0.50879	-1.0093	124.41	-11.403	1523.371	-2.3715	0.66914	-1.4746
0.148	-28.102	74.713	406.716	-0.15088	0.22226	-0.32724	-20.105	98.8332	507.047	-0.16846	0.29932	-0.37939	-55.4693	161.4862	752.4262	-0.41309	0.49219	-0.96289	134.3615	-40.166	1553.15	-2.491	0.96133	-1.5457
0.15	-12.929	74.365	415.925	-0.16016	0.22363	-0.34082	-25.18	108.3133	488.248	-0.13696	0.27417	-0.33838	-33.2985	153.422	723.0009	-0.40039	0.46289	-0.89063	71.2493	-115.45	1526.14	-2.4869	1.2344	-1.6213
0.152	-8.362	63.587	430.039	-0.16201	0.23057	-0.35537	-25.592	128.786	491.6353	-0.097656	0.24268	-0.2876	-39.249	132.4127	684.6082	-0.39551	0.44727	-0.86035	93.092	-130.508	1500.13	-2.3433	1.4067	-1.7026
0.154	-7.389	63.707	439.641	-0.1625	0.23965	-0.3667	-25.41	136.428	491.0195	-0.066895	0.24316	-0.27246	-60.8513	128.751	638.771	-0.375	0.43213	-0.79834	49.5001	-170.648	1453.158	-1.9657	1.434	-1.7441
0.156	-9.482	54.79	463.407	-0.16563	0.24355	-0.38506	-18.898	119.812	475.5699	-0.052734	0.22803	-0.25146	-15.265	116.3017	633.4337	-0.35791	0.40674	-0.74902	11.897	-154.496	1420.922	-1.4141	1.2748	-1.6442
0.158	11.149	63.632	479.979	-0.15625	0.25644	-0.396	-49.789	113.605	451.357	-0.028809	0.22803	-0.22754	-24.975	125.931	595.399	-0.34521	0.39502	-0.70361	-3.14	-183.292	1362.899	-0.91094	1.0498	-1.5394
0.16	5.698	60.805	486.716	-0.15674	0.27002	-0.41553	-41.8746	88.611	424.9202	-0.0026855	0.20483	-0.19043	-49.879	133.7372	558.354	-0.32666	0.36963	-0.64209	5.463	-183.714	1320.125	-0.5043	0.8625	-1.486
0.162	-17.154	73.196	495.94	-0.14942	0.2794	-0.42822	-23.6307	80.3003	393.011	0.024414	0.17969	-0.15039	-20.779	129.23039	554.459	-0.31689	0.36084	-0.60498	11.3055	-229.847	1286.213	-0.22607	0.71338	-1.4888
0.164	8.843	63.233	501.079	-0.14463	0.29102	-0.44453	-14.426	92.1485	357.513	0.037598	0.19385	-0.15234	-39.4267	124.6219	518.226	-0.29883	0.34277	-0.54883	24.1008	-210.804	1312.383	-0.054885	0.61807	-1.5091
0.166	-0.738	57.106	521.539	-0.1415	0.30274	-0.45742	-42.50471	96.23657	331.2031	0.047852	0.19336	-0.14893	-53.4233	132.6862	472.026	-0.27758	0.32617	-0.50195	-1.6697	-153.081	1381.165	0.04375	0.58652	-1.5117
0.168	12.404	48.073	525.664	-0.13389	0.31094	-0.46728	-25.3449	83.5802	312.607	0.067871	0.19971	-0.12646	-20.46	133.498598	466.4428	-0.25098	0.31494	-0.46289	-58.899	-78.99	1395.574	0.078906	0.5748	-1.4976
0.17	-7.761	56.624	534.339	-0.12842	0.31738	-0.49121	-20.4667	68.9822	291.379	0.083985	0.19727	-0.11377	-39.673	129.86	471.203	-0.20361	0.29297	-0.41602	-46.563	-99.67	1380.177	0.089551	0.52559	-1.4799
0.172	0.515000000000001	55.385	546.625	-0.12109	0.32051	-0.50039	-10.893	63.569	286.7214	0.10303	0.18555	-0.083984	-61.4389	146.784	438.03081	-0.18164	0.2793	-0.3833	-64.828	-155.704	1334.968	0.085449	0.4751	-1.4604
0.174	7.674	64.159	555.237	-0.11025	0.33086	-0.51397	-6.151	63.0073	280.3877	0.12988	0.19189	-0.069336	-43.673	140.53	425.0062	-0.14746	0.25195	-0.32715	-22.1769	-257.99	1330.861	0.03125	0.42959	-1.4622
0.176	-3.728	74.099	559.564	-0.10869	0.33516	-0.53272	-5.738	82.4217	273.3926	0.13281	0.19434	-0.065918	-32.9267	129.779	401.78705	-0.11206	0.22485	-0.28809	6.9504	-309.936	1376.456	-0.04795	0.40557	-1.4683
0.178	4.156	85.513	571.532	-0.10186	0.33574	-0.5499	-19.3871	108.011	253.418	0.14941	0.19678	-0.063965	-44.456	120.045	380.48298	-0.088867	0.21631	-0.26514	-26.674	-330.482	1434.013	-0.1667	0.41806	-1.4808
0.18	7.224	80.034	581.287	-0.104	0.34033	-0.56396	-28.4925	122.761	235.9925	0.15918	0.198	-0.058838	-9.271	110.8281	372.1877	-0.041992	0.17822	-0.20654	-84.263	-353.225	1412.826	-0.32851	0.45762	-1.5279
0.182	14.757	83.835	593.849	-0.1043	0.34658	-0.58486	-13.999	109.62	213.98743	0.16602	0.19092	-0.044922	-15.258	108.8806	333.1034	-0.021484	0.1792	-0.19922	1.054	-361.289	1408.185	-0.48779	0.49658	-1.5874
0.184	-1.683	79.4	596.754	-0.10596	0.34726	-0.60859	-17.888	108.025	198.6688	0.17334	0.1958	-0.044922	-42.057	119.9441	288.4889	0.022461	0.15332	-0.16602	74.119	-359.072	1406.021	-0.62109	0.51582	-1.6258
0.186	-8.497	87.668	594.524	-0.10908	0.35703	-0.63711	-14.0177	97.889	190.10643	0.17236	0.19434	-0.036621	0.860999999999997	107.0183	277.7328	0.053711	0.13672	-0.13623	66.61	-302.377	1483.57	-0.73545	0.51534	-1.6671
0.188	-8.988	88.773	610.118	-0.11406	0.36631	-0.66201	-17.8579	96.854	162.52	0.16748	0.19092	-0.033203	-20.887	96.0075	281.5356	0.086914	0.12061	-0.10254	96.199	-256.241	1563.989	-0.86748	0.55869	-1.7577
0.19	6.091	91.361	612.05	-0.11914	0.37695	-0.68799	-9.5302	73.6156	132.467	0.16381	0.18945	-0.029053	-40.42	97.6508	250.255	0.11279	0.12012	-0.081055	69.58	-205.7425	1614.0689	-1.0183	0.66768	-1.8816
0.192	7.944	88.371	606.665	-0.12412	0.39424	-0.71318	-19.327	65.7104	122.796	0.15625	0.18848	-0.024414	-15.585	92.2652	248.6909	0.12451	0.1123	-0.078613	66.414	-150.912	1643.219	-1.1558	0.80713	-2.019
0.194	-22.064	86.568	628.779	-0.13379	0.40762	-0.74766	-15.777	50.1744	145.431	0.13721	0.18848	-0.021484	-15.171	95.216	240.8694	0.15625	0.094727	-0.044434	118.4183	-63.872	1593.085	-1.2156	0.88789	-2.1004
0.196	-6.192	89.77	640.306	-0.13965	0.42637	-0.77422	-12.037	49.8727	136.6832	0.12695	0.19067	-0.020752	-50.6931	116.558	215.4436	0.17505	0.078369	-0.013428	172.808	-38.856	1558.5673	-1.2229	0.93369	-2.1484
0.198	7.60299999999999	97.54	638.464	-0.14473	0.44101	-0.80254	-11.467	65.8704	129.0822	0.12158	0.19043	-0.019043	-17.917	114.867	210.4627	0.18848	0.065918	0.0024414	116.074	-23.9	1527.872	-1.2155	0.96377	-2.2042
0.2	14.81	102.887	649.935	-0.14404	0.4541	-0.8335	-16.9249	82.5201	133.8764	0.12354	0.19482	-0.01416	-12.199	107.499	192.4879	0.2041	0.062988	0.0058594	110.48	-68.612	1562.142	-1.2293	0.99609	-2.268
0.202	-10.104	97.448	656.021	-0.15176	0.47588	-0.8585	-24.6456	82.3821	131.2974	0.13037	0.19922	-0.020996	-45.0761	100.458	154.4505	0.21094	0.066895	0.013184	110.81	-100.536	1582.1792	-1.2622	1.0317	-2.3022
0.204	-4.514	100.301	665.682	-0.16133	0.49306	-0.88623	-18.9523	70.0733	116.7608	0.13086	0.19189	-0.013672	-20.744	73.2842	167.2155	0.21533	0.072266	0.018555	125.4597	-88.97639	1599.505	-1.3158	1.0778	-2.3377
0.206	5.844	102.45	655.215	-0.17422	0.50908	-0.91318	-26.8451	62.3169	107.4049	0.13452	0.18603	-0.0080566	-19.704	71.787	148.023176	0.21924	0.07251	0.035645	170.406	-81.8937	1604.62	-1.3775	1.1129	-2.359
0.208	-9.924	115.727	660.014	-0.19053	0.52715	-0.93672	-18.604	47.8973	97.6654	0.1333	0.1748	-0.003418	-35.889	79.7586	113.0059	0.22168	0.061523	0.053711	153.969	-64.71	1592.4529	-1.4385	1.152	-2.3699
0.21	-1.945	124.123	670.782	-0.20801	0.54004	-0.9624	-17.8102	37.5746	68.6413	0.13477	0.16406	0.00048828	-19.161	67.443	131.3392	0.22119	0.067383	0.068359	105.809	-93.224	1583.7358	-1.463	1.1495	-2.354
0.212	-6.678	126.48	678.497	-0.22373	0.56093	-0.99043	-11.742	50.5156	66.29213	0.13135	0.15479	0.0039063	-31.462	75.2298	111.1573	0.21777	0.064941	0.068359	87.33	-84.807	1597.446	-1.4346	1.0957	-2.3086
0.214	9.788	145.814	662.305	-0.24277	0.57598	-1.0089	-28.76601	54.804	61.761	0.12842	0.12598	0.0043945	-45.627	79.4153	105.4648	0.21973	0.056641	0.090332	90.45	-84.914	1595.749	-1.3655	0.99314	-2.2654
0.216	-0.905999999999999	153.246	668.397	-0.25605	0.58691	-1.0254	-24.4803	58.0019	62.6881	0.12402	0.12255	0.0053711	-20.343	69.511	97.3813	0.22607	0.055908	0.090576	44.677	-108.558	1590.165	-1.2827	0.88603	-2.2374
0.218	3.447	159.274	685.137	-0.27901	0.6081	-1.0553	-22.8739	40.7428	46.9427	0.12207	0.11328	0.0048828	-34.129	73.1576	84.0583	0.23486	0.058594	0.09668	61.957	-104.719	1580.114	-1.1944	0.80557	-2.1984
0.22	7.012	146.563	697.531	-0.29736	0.61914	-1.0679	-34.15673	32.466	48.534	0.12061	0.10645	0.014648	-49.0196	77.7971	82.50379	0.25049	0.058105	0.099609	20.318	-95.518	1538.769	-1.0881	0.76875	-2.1682
0.222	6.448	152.796	688.944	-0.31611	0.6419	-1.0866	-15.689	20.806	44.719	0.11865	0.104	0.0073242	-26.451	64.8642	92.5541	0.25732	0.055176	0.10352	5.456	-36.2114	1480.9655	-0.99316	0.74805	-2.1406
0.224	15.851	148.117	690.707	-0.33535	0.65781	-1.0957	-2.495	29.491	36.435	0.11523	0.10791	0.0014648	-47.288	65.2784	80.26644	0.27344	0.036133	0.1167	12.7079	26.851	1395.229	-0.91797	0.74179	-2.1211
0.226	-4.26900000000001	155.251	690.89	-0.35801	0.67344	-1.1019	-3.03	29.3941	41.976	0.11987	0.09668	0.0061036	-58.476	56.6473	61.3309	0.28003	0.032959	0.11279	22.8613	77.918	1342.31	-0.83476	0.73047	-2.0844
0.228	15.669	162.267	686.771	-0.38672	0.68819	-1.1099	-31.7769	31.6328	40.7425	0.11963	0.10254	0.0063477	-2.31	47.1965	56.5227	0.28174	0.022949	0.11475	-10.354	90.994	1291.88	-0.76445	0.71484	-2.0422
0.23	6.97199999999999	171.021	680.033	-0.41064	0.69336	-1.1104	-5.464	16.638	24.7601	0.12451	0.096191	0.0092773	-21.503	45.5915	44.997	0.28906	0.0019531	0.11963	-46.375	101.199	1286.596	-0.70869	0.69795	-1.9973
0.232	8.681	165.662	695.83	-0.43262	0.70079	-1.1016	-22.86518	23.8223	24.8672	0.12988	0.09668	0.0097656	-37.858	53.6662	28.963	0.28711	-0.00024415	0.11279	-36.4976	117.7836	1253.602	-0.66211	0.67578	-1.9375
0.234	8.342	157.514	721.46	-0.45313	0.69844	-1.0943	-17.633	25.5031	31.7607	0.1377	0.095703	0.0097656	-25.408	44.75858	42.2587	0.27539	-0.0063477	0.10498	-41.804	170.879	1230.893	-0.61738	0.66621	-1.8951
0.236	8.08	154.903	708.079	-0.47422	0.69297	-1.0834	-10.293	23.0669	33.0652	0.14307	0.10181	0.011475	-38.663	45.517	26.034	0.27002	-0.011719	0.09668	-9.915	200.291	1189.588	-0.56826	0.65401	-1.8413
0.238	20.273	162.258	716.242	-0.49082	0.67969	-1.0727	-3.404	12.1985	16.259	0.15137	0.10059	0.016113	-37.18	39.3685	24.518	0.26172	-0.01123	0.097168	-29.5949	225.198	1132.673	-0.52569	0.64814	-1.7847
0.24	-1.03	163.777	713.233	-0.50391	0.66113	-1.0547	-23.8638	3.568	2.55	0.16357	0.092285	0.023438	-1.155	20.8468	35.818	0.24658	-0.0087891	0.087402	-36.679	227.24	1108.465	-0.50371	0.65567	-1.7262
0.242	17.377	164.184	720.007	-0.5125	0.6332	-1.0387	-15.6143	-4.0569	-4.818	0.16846	0.089844	0.026367	-18.251	17.2535	47.2189	0.23535	0.0014649	0.080078	-51.437	207.837	1110.752	-0.49365	0.67725	-1.6753
0.244	23.079	166.135	711.963	-0.51992	0.60195	-1.0234	-4.9723	-2.9922	-17.46069	0.17529	0.085938	0.02832	-28.082	34.2694	40.1818	0.22266	0.014648	0.065918	-12.57824	194.773	1116.057	-0.50146	0.69717	-1.6153
0.246	4.058	181.834	692.846	-0.52734	0.57343	-1.0137	-8.3291	14.6006	1.71665	0.17944	0.083496	0.029297	-29.4883	29.8626	33.8126	0.21582	0.038086	0.058105	9.1427	160.118	1086.6091	-0.51025	0.71416	-1.5542
0.248	-10.118	185.025	699.518	-0.5333	0.54141	-1.0051	-6.252	24.7809	12.4286	0.19238	0.071777	0.036133	-27.372	38.073	23.0926	0.21289	0.047363	0.054199	25.972	150.66	1021.412	-0.52275	0.72198	-1.4886
0.25	4.307	178.446	719.348	-0.54639	0.51904	-1.0015	-12.001	20.859	5.0357	0.19482	0.059082	0.039551	-29.189	35.59	4.02	0.20508	0.068848	0.042969	14.253	134.674	958.0303	-0.52568	0.72276	-1.4159
0.252	12.574	169.989	703.28	-0.55947	0.50576	-0.99737	-7.557	27.6727	9.5326	0.2002	0.057617	0.049805	-12.302	20.9693	9.6999	0.20483	0.086914	0.037353	-26.082	155.307	942.139	-0.52588	0.71143	-1.3452
0.254	-0.912999999999997	185.86	704.905	-0.56875	0.50059	-0.99571	-17.6079	21.0105	17.7949	0.20068	0.044922	0.041016	-16.702	32.176	-4.114	0.20508	0.10059	0.039551	-37.863	160.541	901.4536	-0.51514	0.6958	-1.2745
0.256	7.681	187.851	710.279	-0.56601	0.50254	-0.99609	-15.0372	19.8583	15.7911	0.20532	0.034424	0.049561	-6.86	30.1363	5.443	0.20215	0.11914	0.032227	-1.426	170.653	903.492	-0.49834	0.67353	-1.1952
0.258	4.90199999999999	190.863	698.044	-0.56016	0.51533	-0.99756	-12.5758	13.591	-0.0380000000000003	0.20801	0.03125	0.047363	-29.0566	23.29315	29.0058	0.19775	0.12109	0.031738	33.5158	192.3083	811.392	-0.47295	0.63643	-1.1245
0.26	12.331	198.654	688.643	-0.54883	0.52832	-0.99512	-5.452	9.1198	1.399	0.21533	0.030273	0.041992	-34.5358	25.6387	27.5707	0.20117	0.12598	0.034668	5.872	213.723	765.179	-0.44073	0.59678	-1.0421
0.262	-10.005	200.782	679.278	-0.52461	0.55215	-0.99629	-19.2056	9.6894	-9.99187	0.21436	0.027344	0.041992	-2.859	34.2384	18.045	0.20288	0.12598	0.04126	4.398	249.144	707.6234	-0.4043	0.53906	-0.94336
0.264	6.892	196.656	685.896	-0.50429	0.57188	-0.9955	-24.86604	11.297	1.67513	0.22217	0.024902	0.040527	-17.421	26.7539	28.4174	0.20654	0.12842	0.047852	-72.171	249.069	670.4849	-0.37266	0.48828	-0.85957
0.266	3.011	186.397	683.627	-0.47656	0.59648	-0.98496	-9.254	21.3494	2.1684	0.22706	0.01123	0.04126	-31.673	33.242	13.574	0.21387	0.12354	0.057617	-20.036	260.576	639.893	-0.34698	0.44668	-0.78203
0.268	0.709000000000003	189.315	673.119	-0.44561	0.61846	-0.97646	-17.6314	27.289	6.4731	0.23145	0.0078125	0.044922	-38.927	35.752	16.5925	0.22021	0.11914	0.050781	-18.849	216.9958	560.5488	-0.32666	0.40762	-0.70782
0.27	9.677	183.361	675.283	-0.41748	0.63525	-0.96631	-27.4395	35.212	13.5684	0.22119	0.0083008	0.030762	-40.0355	39.697	17.1533	0.23047	0.11768	0.057129	13.41701	199.183	525.988	-0.30693	0.37422	-0.63975
0.272	13.588	178.2477	699.085	-0.39697	0.63623	-0.96572	-13.88024	19.1683	20.0178	0.21631	0.0068359	0.027344	-36.103	36.667	-3.7247	0.23902	0.11547	0.058106	-21.2451	177.273	482.4213	-0.28467	0.34229	-0.56396
0.274	10.345	184.9517	710.88	-0.38359	0.63399	-0.96719	-15.455	11.9344	11.0535	0.20947	0.014648	0.022461	-28.634	30.2569	25.5338	0.25	0.11865	0.055664	-57.297	172.721	460.9738	-0.26299	0.31104	-0.49971
0.276	-24.808	196.492	714	-0.3875	0.63007	-0.96953	-12.4946	12.24904	11.587	0.20093	0.018311	0.013183	-36.5936	20.9294	35.6763	0.27002	0.12207	0.049805	-61.0212	191.2591	402.08	-0.23271	0.27168	-0.41592
0.278	-1.305	194.474	737.48	-0.40234	0.6166	-0.98028	-14.124	24.27068	-12.6831	0.19434	0.026855	0.013184	-36.681	22.5298	32.7715	0.27832	0.12598	0.04248	-54.6047	192.12	343.027	-0.20186	0.23965	-0.35225
0.28	-14.223	196.89	767.63	-0.42334	0.61084	-0.98975	-20.4446	35.4947	-5.8298	0.18799	0.038574	-0.0078125	-10.111	28.3839	22.63326	0.29785	0.1333	0.035645	-36.9048	191.397	312.781	-0.17666	0.22149	-0.3084
0.282	8.853	218.082	800.8	-0.45996	0.60508	-1.0129	-14.709	45.982	3.4816	0.18359	0.054199	-0.013184	-53.8815	24.5845	28.751	0.30957	0.13916	0.026123	-47.3854	127.361	306.726	-0.1499	0.2041	-0.271
0.284	14.528	244.279	845.61	-0.49961	0.60557	-1.0359	-5.654	39.004	13.229498	0.18115	0.071777	-0.027832	-33.458	35.7361	22.8528	0.31396	0.14453	0.012207	-54.7324	117.934	308.401	-0.11777	0.1669	-0.2043
0.286	20.714	254.039	895.85	-0.5375	0.61573	-1.0621	-17.8504	37.152	14.4412	0.18286	0.095459	-0.044189	1.234	34.237	23.6442	0.32471	0.1499	-0.0039063	-68.977	112.538	297.932	-0.092774	0.13145	-0.14013
0.288	31.715	248.86	954.62	-0.57647	0.63545	-1.0827	-16.8484	22.4838	22.69626	0.18359	0.11572	-0.061035	-50.1012	20.2328	18.731	0.32324	0.15381	-0.0097656	-32.6549	143.633	289.588	-0.084961	0.13027	-0.11279
0.29	19.441	238.14	976.28	-0.6167	0.65869	-1.105	-3.293	19.9458	23.9087	0.18408	0.13965	-0.080566	-4.608	36.2929	7.281	0.32324	0.16064	-0.03125	-49.063	145.6724	239.5936	-0.073731	0.10312	-0.073828
0.292	31.13606	225.969	1030.84	-0.64737	0.68623	-1.1329	-8.0503	7.8917	18.9157	0.18262	0.15771	-0.090332	-16.723	35.7877	26.3113	0.32373	0.17212	-0.049805	-46.7986	156.1432	176.2218	-0.06543	0.091309	-0.037109
0.294	29.61	202.34	1080.42	-0.67265	0.71074	-1.1579	-13.904	11.7088	5.2248	0.18213	0.18359	-0.11035	-47.678	30.4166	43.9876	0.32715	0.18164	-0.069824	-24.268	147.594	135.594	-0.062012	0.075977	-0.016894
0.296	30.311	180.5639	1101.52	-0.69375	0.73965	-1.175	-10.3339	15.9817	2.809	0.17651	0.20313	-0.1228	-15.932	33.0486	31.3171	0.31738	0.19775	-0.093262	-50.69884	142.205	141.743	-0.055859	0.048242	0.02334
0.298	27.782	142.254	1118.29	-0.71318	0.76494	-1.1946	-8.007	32.7415	-4.2279	0.16504	0.21924	-0.13818	-3.231	27.6417	26.6322	0.31445	0.20801	-0.10889	-27.0486	146.857	141.421	-0.051562	0.04707	0.037793
0.3	9.175	106.394	1131.99	-0.73828	0.79883	-1.207	-8.83429	26.7407	7.203	0.1543	0.24854	-0.15332	-41.6397	21.9318	34.3525	0.30811	0.23242	-0.13867	13.7768	125.039	148.549	-0.045606	0.046972	0.050586
0.302	0.0219999999999985	62.161	1164.33	-0.75263	0.82646	-1.2102	-8.611	26.8808	20.6291	0.14844	0.25928	-0.16309	-8.916	27.8728	19.02476	0.30347	0.25219	-0.15844	0.552899999999999	127.998	91.35	-0.041504	0.054199	0.055664
0.304	-3.786	13.57	1177.32	-0.75235	0.85469	-1.2008	-28.306	22.9583	49.903	0.13916	0.28125	-0.17676	6.358	28.47699	18.1727	0.29199	0.27734	-0.17871	-9.935	97.014	75.4123	-0.039453	0.064258	0.068945
0.306	9.393	-10.7	1160.02	-0.73203	0.88125	-1.1812	-7.4331	23.4009	28.8412	0.13892	0.29321	-0.19092	-47.7427	36.7204	9.6747	0.27441	0.28613	-0.21045	8.905	105.276	66.647	-0.034082	0.076074	0.074316
0.308	-18.87	-47.071	1153.76	-0.68838	0.90595	-1.1514	1.2964	8.0076	34.4962	0.12988	0.30225	-0.20898	-9.273	32.17935	17.189	0.26318	0.2915	-0.2251	-29.453	82.294	81.2517	-0.03252	0.097946	0.073145
0.31	-1.959	-66.931	1140.96	-0.63037	0.92236	-1.1147	-18.537	20.0414	21.199	0.11523	0.31543	-0.23096	-7.525	17.3324	50.317	0.23633	0.33984	-0.28711	34.3311	76	84.807	-0.021875	0.12705	0.072558
0.312	-29.454	-84.132	1112.77	-0.55166	0.92842	-1.0649	-6.606	17.0675	23.852	0.095215	0.31885	-0.24902	-58.9979	-6.846	82.774	0.1958	0.35327	-0.33008	23.2142	47.615	69.368	-0.018555	0.16016	0.073242
0.314	-6.11	-76.362	1072.71	-0.47041	0.92305	-1.0195	-5.3584	12.0322	32.24	0.023926	0.31055	-0.28369	-11.877	19.76	87.377	0.14697	0.37354	-0.36865	13.6818	41.224	70.635	-0.0069336	0.19072	0.074512
0.316	-7.22300000000001	-90.855	1052.59	-0.4001	0.89883	-0.96953	-22.4031	8.9856	73.043	-0.049561	0.27978	-0.32202	-9.66	39.41334	108.672	0.07373	0.37207	-0.41162	-22.0342	26.3564	56.78499	0.0051758	0.22012	0.076367
0.318	-20.827	-104.648	1037.02	-0.34971	0.87451	-0.92002	-44.5159	24.2436	120.512	-0.15332	0.25684	-0.37695	-84.4242	44.364174	151.5276	0.032715	0.37354	-0.4502	7.689	12.07365	67.8741	0.014551	0.24629	0.085742
0.32	-29.561	-109.854	1013.12	-0.32422	0.8418	-0.87695	-13.387	33.529	181.66082	-0.36133	0.24121	-0.44824	-46.87	74.5766	203.8056	-0.078125	0.3833	-0.55176	-15.004	14.9474	29.1607	0.024902	0.26943	0.096971
0.322	-61.367	-112.507	989	-0.32305	0.8167	-0.84209	-73.154	30.2339	318.9526	-0.49072	0.24463	-0.49854	-51.422	88.6539	303.08	-0.18799	0.40161	-0.62915	2.918	-22.9899	26.3988	0.037598	0.28711	0.10889
0.324	-50.595	-111.675	976.216	-0.33984	0.79766	-0.8207	-86.933	39.792	491.078	-0.81836	0.24219	-0.57031	-91.594	81.368	428.905	-0.33105	0.40625	-0.68164	8.666	-4.319	16.94243	0.053808	0.29609	0.12344
0.326	-89.76	-133.09	967.072	-0.375	0.78476	-0.80547	-90.039	45.8904	644.099	-1.116	0.26734	-0.60913	-83.083	88.855	553.167	-0.57715	0.44922	-0.77148	-61.541	-26.7167	7.9992	0.068653	0.31026	0.13975
0.328	-97.809	-122.933	949.995	-0.42158	0.78457	-0.79238	-59.064	25.5941	785.162	-1.4507	0.35303	-0.66357	-75.879	55.9934	703.811	-0.7168	0.48828	-0.8252	-28.2341	10.702	13.6259	0.086621	0.31065	0.15576
0.33	-107.1652	-128.738	940.424	-0.46826	0.79541	-0.80029	-80.458	13.2497	905.344	-1.937	0.54834	-0.81787	-99.835	41.6727	811.3652	-1.0298	0.6333	-0.95459	-59.324	5.8711	0.21863	0.10859	0.30684	0.17548
0.332	-116.77	-157.407	944.253	-0.51719	0.81661	-0.82285	-77.662	18.1539	1027.5363	-2.1289	0.63379	-0.88672	-85.327	53.311	896.559	-1.2456	0.74317	-1.002	-24.101	39.126	-22.1913	0.13135	0.30908	0.19824
0.334	-117.0229	-177.982	962.489	-0.56475	0.85088	-0.85069	-77.2873	37.142099	1112.8212	-2.3589	0.85498	-1.0054	-129.7262	35.9821	963.742	-1.4395	0.89258	-1.0615	-29.275	47.847	-23.8379	0.1541	0.31045	0.20742
0.336	-124.7954	-215.509	975.664	-0.60225	0.88838	-0.87725	-108.594	39.188	1158.6024	-2.3066	1.1016	-1.0674	-130.0416	16.73	1000.941	-1.5688	1.1489	-1.146	-41.0772	58.9393	3.669	0.19121	0.29776	0.23379
0.338	-100.485	-231.202	993.406	-0.62812	0.93203	-0.90449	-96.5977	37.0235	1163.3139	-2.2109	1.2578	-1.1045	-75.645	-2.353	1015.7741	-1.5737	1.272	-1.1968	-69.846	47.0277	10.37	0.23574	0.27745	0.26738
0.34	-114.231	-242.806	992.768	-0.65137	0.98438	-0.94531	-75.422	11.9385	1189.47	-2.0054	1.5454	-1.2808	-107.541	-24.139	1052.627	-1.4805	1.4453	-1.2871	-71.317	35.5668	29.2128	0.28769	0.24893	0.29541
0.342	-121.344	-258.972	1007.869	-0.67109	1.0418	-0.97403	-70.434	-16.449	1204.641	-1.8003	1.6783	-1.398	-97.923	-17.3031	1079.472	-1.3105	1.5264	-1.3335	-37.6126	39.7656	13.797	0.34424	0.19727	0.33691
0.344	-119.917	-267.73	1009.716	-0.69922	1.102	-1.0183	-63.197	-34.236	1230.281	-1.5171	1.6938	-1.3813	-82.3713	-21.458	1087.133	-1.0933	1.5454	-1.3394	-36.3034	19.974	1.067	0.38438	0.19873	0.31602
0.346	-125.034	-258.7117	1016.024	-0.7289	1.1535	-1.0508	-78.676	-30.98	1232.6596	-1.1323	1.5083	-1.187	-103.7516	-56.2022	1139.09	-0.79492	1.4531	-1.2656	-40.1892	42.786	-22.229	0.42266	0.15039	0.3206
0.348	-126.461	-247.7968	1039.705	-0.76074	1.2111	-1.0842	-47.7139	-39.678	1240.73662	-1.022	1.4165	-1.1147	-87.484	-85.229	1137.536	-0.68164	1.3506	-1.2012	-65.534	14.407	-0.367999999999999	0.45703	0.11054	0.32998
0.35	-145.4677	-257.4891	1069.0596	-0.7998	1.2637	-1.1152	-39.7695	-46.181	1222.702	-0.93896	1.229	-1.0112	-25.706	-103.382	1104.2178	-0.56445	1.1548	-1.0874	-47.00862	29.476	-9.603	0.48164	0.055176	0.34375
0.352	-129.941	-246.3235	1067.6026	-0.82685	1.3126	-1.1468	23.297	-57.426	1224.0448	-0.97388	1.1252	-0.97338	-25.647	-125.682	1130.3338	-0.55591	1.0551	-1.0542	-18.928	14.1782	34.907	0.49707	0.0048828	0.35449
0.354	-165.25473	-222.71026	1070.354	-0.84638	1.3587	-1.171	5.361	-68.553	1228.228	-1.0566	1.085	-0.94238	-57.796	-97.417	1135.2553	-0.57178	0.979	-1.0327	13.13924	42.084	60.8629	0.50899	-0.033789	0.34648
0.356	-133.404	-192.509	1071.091	-0.84951	1.3946	-1.1906	-21.3375	-75.931	1278.89949	-1.1982	1.0723	-0.9082	-52.731	-94.903	1147.5893	-0.60889	0.86768	-1.0103	-0.894400000000001	29.882	51.6646	0.50117	-0.063086	0.33213
0.358	-136.279	-173.226	1102.88029	-0.82861	1.4327	-1.205	-85.53	-107.166	1318.0941	-1.2573	1.0649	-0.89014	-78.5503	-109.343	1184.55995	-0.63818	0.83057	-1.0015	13.1982	36.358	43.56681	0.49883	-0.079883	0.30869
0.36	-109.19	-153.128	1111.8399	-0.79297	1.4551	-1.209	-55.293	-150.707	1301.09	-1.3413	1.0229	-0.85889	-71.1435	-110.157	1176.0709	-0.71289	0.81934	-1.0234	-20.61	21.1417	33.9911	0.48808	-0.075684	0.28047
0.362	-116.5364	-151.64	1127.553	-0.74424	1.465	-1.2073	-31.5629	-191.366	1277.8526	-1.3828	0.9966	-0.86035	-42.417	-157.57	1166.22	-0.7876	0.8374	-1.065	-17.268	26.082	40.9233	0.48828	-0.10449	0.28857
0.364	-117.178	-165.515	1142.6065	-0.68604	1.4583	-1.1933	-5.433	-215.6684	1268.656	-1.4097	0.97705	-0.88037	-47.248	-216.823	1225.581	-0.85742	0.86523	-1.1094	8.288	38.094	21.9152	0.48437	-0.10312	0.28155
0.366	-101.95	-181.4123	1145.9199	-0.62588	1.424	-1.1682	-13.408	-239.6855	1290.679	-1.418	0.97266	-0.92773	-62.016	-228.76612	1239.719	-0.92773	0.88672	-1.1719	9.549	27.351	49.49	0.46816	-0.086523	0.24883
0.368	-106.979	-180.1157	1145.6353	-0.57608	1.3633	-1.1385	5.96	-260.116	1313.543	-1.418	0.96875	-0.95508	-43.261	-245.2632	1268.733	-0.95898	0.90039	-1.2129	-15.27805	53.476	11.36076	0.44863	-0.067382	0.21992
0.37	-98.619	-176.0693	1138.003	-0.5376	1.3013	-1.1001	8.444	-278.486	1342.5999	-1.4487	0.96533	-1.0132	-5.76000000000001	-260.916	1277.712	-1.0366	0.93408	-1.2925	8.136	5.612	13.2584	0.43223	-0.04414	0.19687
0.372	-107.727	-194.5132	1127.1747	-0.52578	1.2334	-1.0807	68.84	-285.697	1361.9354	-1.4903	0.9668	-1.0469	19.335	-270.797	1294.5019	-1.1191	0.99414	-1.3789	11.393	29.5094	25.5496	0.41162	-0.013184	0.17822
0.374	-112.79	-197.0945	1101.2696	-0.52168	1.1789	-1.0543	84.325	-312.129	1394.3784	-1.5508	0.97656	-1.085	23.407	-286.201	1328.884	-1.1558	1.0239	-1.4097	-36.777	14.8864	16.4786	0.38282	0.018945	0.15674
0.376	-115.0244	-183.92061	1095.77232	-0.53144	1.141	-1.0375	60.706	-312.132	1428.4988	-1.6641	1.0117	-1.1289	-7.287	-294.375	1384.75	-1.2207	1.0781	-1.4648	13.505	32.87166	33.89	0.35752	0.051562	0.14111
0.378	-120.8642	-176.9059	1097.643	-0.54219	1.1201	-1.0176	-14.225	-276.092	1479.4652	-1.7168	1.0449	-1.1523	-3.181	-265.863	1416.982	-1.2732	1.1262	-1.5002	-6.5534	0.1555	35.226	0.32978	0.082813	0.12471
0.38	-103.474	-180.475	1101.93	-0.54785	1.1172	-1.0059	-23.922	-232.0694	1507.2628	-1.8335	1.1411	-1.2202	-32.795	-247.582	1452.897	-1.3101	1.1802	-1.5347	-11.0171	-15.871	17.09816	0.30527	0.11094	0.1084
0.382	-106.184	-180.645	1069.82539	-0.54365	1.1188	-0.99346	-61.93568	-186.505	1530.112	-1.8963	1.2073	-1.2585	-72.8622	-223.7958	1510.456	-1.3413	1.2505	-1.5679	-46.104	-28.4893	2.6598	0.28027	0.14258	0.083008
0.384	-102.334	-141.272	1017.552	-0.52432	1.1262	-0.98711	-78.009	-148.786	1528.3709	-1.957	1.2852	-1.3086	-67.6049	-194.955	1504.1	-1.3545	1.2813	-1.5859	-36.4168	-14.339	12.367	0.26387	0.17217	0.066309
0.386	-121.344	-120.8485	1013.7749	-0.49775	1.1316	-0.9832	-59.8694	-148.719	1543.325	-2.0386	1.4282	-1.3921	-79.6996	-175.837	1492.4	-1.3828	1.3633	-1.625	-40.0151	33.822	-8.13385	0.24238	0.20615	0.051953
0.388	-107.764	-102.357	1004.048	-0.46553	1.1385	-0.97774	-45.867	-160.203	1565.242	-2.0664	1.4922	-1.4277	-81.2944	-137.044	1532.452	-1.4072	1.4278	-1.6641	-37.8184	41.567	16.4028	0.22402	0.23467	0.036719
0.39	-100.69	-91.77	993.3908	-0.43945	1.1387	-0.97461	-68.8836	-146.257	1601.42	-2.1362	1.6333	-1.4976	-75.8365	-110.445	1550.476	-1.4346	1.5	-1.7051	-48.1578	50.22159	0.610000000000003	0.20683	0.26426	0.030078
0.392	-105.323	-82.089	976.30702	-0.41953	1.1427	-0.96572	-47.866	-119.972	1627.698	-2.174	1.7336	-1.5427	-82.3776	-109.7576	1579.1264	-1.4512	1.585	-1.748	-58.8917	3.559	10.3008	0.19775	0.29199	0.020508
0.394	-117.61	-99.35	953.3449	-0.41084	1.1439	-0.96318	-31.175	-125.6292	1670.548	-2.2007	1.8169	-1.5786	-56.012	-86.131	1601.9785	-1.4507	1.6255	-1.7671	-32.227	15.219	16.96	0.19063	0.31094	0.016211
0.396	-121.7268	-113.5179	938.637	-0.40303	1.1356	-0.95733	-65.545	-131.023	1693.1469	-2.2007	1.897	-1.6069	-70.4639	-89.857	1597.503	-1.4414	1.6797	-1.7988	-52.9277	10.561	31.54109	0.18682	0.33164	-0.0018556
0.398	-101.343	-101.3129	905.822	-0.38955	1.1225	-0.94502	-69.5448	-133.679	1737.9173	-2.1836	1.9141	-1.6152	-68.3744	-103.975	1633.762	-1.4106	1.7027	-1.8072	-34.5694	53.4127	3.095	0.17939	0.34453	-0.019043
0.4	-123.365	-88.3531	889.1729	-0.37109	1.1016	-0.92969	-66.8804	-140.599	1751.653	-2.0957	1.9336	-1.6152	-53.376	-90.123	1688.5089	-1.3784	1.7183	-1.814	-57.3245	49.858	3.683	0.16201	0.36406	-0.054102
0.402	-107.837	-92.6562	874.5694	-0.35313	1.0818	-0.91719	-89.875	-148.961	1751.347	-2.0066	1.926	-1.5915	-48.024	-84.218	1685.912	-1.335	1.7285	-1.8066	-31.76844	66.65	-14.774	0.14063	0.37695	-0.080078
0.404	-106.2928	-109.319528	871.80527	-0.329	1.0567	-0.896	-116.705	-125.808	1716.662	-1.9019	1.9048	-1.5698	-79.997	-81.955	1690.489	-1.3066	1.7285	-1.7969	-39.6669	40.9099	-12.599	0.11777	0.3748	-0.095603
0.406	-91.6728	-111.8101	857.12617	-0.3083	1.027	-0.87881	-112.827	-119.8764	1717.867	-1.7568	1.8379	-1.5195	-79.203	-67.4868	1693.28	-1.2441	1.7031	-1.7715	-19.415	31.93998	31.488	0.087598	0.39893	-0.12529
0.408	-91.7732	-105.654	829.597	-0.28067	0.99345	-0.85381	-105.02	-118.4153	1706.193	-1.6831	1.7944	-1.4878	-91.071	-82.0705	1671.5192	-1.1924	1.669	-1.7353	-21.15263	42.079	43.677	0.05166	0.41573	-0.14639
0.41	-75.039	-101.538	822.2152	-0.25293	0.95898	-0.83789	-93.0377	-119.3547	1712.3554	-1.5645	1.7109	-1.4121	-83.5391	-69.2909	1668.8609	-1.1328	1.627	-1.6973	-15.0969	29.808	67.2001	0.015137	0.45459	-0.18672
0.412	-86.588	-79.598	787.4106	-0.22481	0.92149	-0.81719	-54.551	-118.5472	1716.4949	-1.5056	1.6526	-1.3533	-33.545	-33.5067	1646.1774	-1.064	1.5737	-1.6479	-7.6464	45.855	25.514	-0.015625	0.48535	-0.21582
0.414	-89.441	-64.2164	751.6548	-0.2001	0.88496	-0.79414	-36.877	-119.136	1682.653	-1.4727	1.5996	-1.3018	-39.901	-29.96256	1610.9917	-1.0366	1.5474	-1.6284	-1.896	0.645700000000001	32.18503	-0.026856	0.50478	-0.23095
0.416	-78.584	-47.829	730.8173	-0.18135	0.85722	-0.77187	-47.7778	-94.129	1637.931	-1.4551	1.5371	-1.2324	-35.468	-21.8929	1602.485	-0.99023	1.5117	-1.584	11.348	22.1205	17.5315	-0.049414	0.57119	-0.28389
0.418	-75.221	-63.121	718.124	-0.16006	0.82402	-0.75449	-57.7082	-54.6746	1595.5287	-1.4507	1.5083	-1.2065	-4.274	-8.3502	1588.7917	-0.97583	1.4866	-1.5696	-21.273	-7.93	33.2563	-0.053711	0.60244	-0.31631
0.42	-69.087	-52.507	706.461	-0.13721	0.79443	-0.7251	-45.576	-30.7724	1559.809	-1.4507	1.4634	-1.1714	-36.11	-5.437	1560.322	-0.96045	1.479	-1.5542	19.51	40.356	47.688	-0.041895	0.63662	-0.34072
0.422	-73.0473	-33.933	685.397	-0.11963	0.75908	-0.71025	-30.383	-27.157	1517.327	-1.4334	1.4349	-1.1482	-3.703	33.109	1532.203	-0.94727	1.4609	-1.541	-17.2476	15.7618	24.4739	-0.032227	0.67432	-0.36084
0.424	-80.774	-22.7866	636.3316	-0.10352	0.72598	-0.69121	-6.68	-35.1127	1496.405	-1.4097	1.4165	-1.1294	11.771	69.3228	1493.955	-0.94336	1.4531	-1.5332	-0.9382	39.439	43.238	-0.015332	0.69004	-0.37998
0.426	-72.372	-25.8929	597.237	-0.086719	0.69199	-0.67168	-3.986	-43.3727	1488.871	-1.3696	1.3931	-1.1108	-21.211	62.997	1465.91	-0.92871	1.4473	-1.5156	-11.66367	7.457	26.3603	0.0023434	0.71718	-0.40254
0.428	-89.138	-19.2809	560.284	-0.072558	0.65947	-0.65146	-26.8673	-48.3429	1464.7084	-1.3491	1.3813	-1.0952	-24.368	87.635	1457.756	-0.92041	1.4433	-1.5009	-5.085	10.7675	28.5083	0.025	0.75351	-0.41386
0.43	-69.974	-3.34082	540.61	-0.059082	0.63232	-0.63232	-57.73	-45.156	1457.8616	-1.3003	1.3579	-1.0728	-43.177	72.191	1437.95	-0.90771	1.4302	-1.48	7.53	24.027	27.2645	0.045117	0.79541	-0.45439
0.432	-56.372	1.7977	545.2871	-0.049121	0.60049	-0.61699	-33.685	-35.683	1441.4329	-1.2654	1.3361	-1.0535	-68.6496	56.751	1431.0198	-0.89795	1.4165	-1.4507	1.329	-6.5713	58.649	0.062988	0.80078	-0.46094
0.434	-42.799	-7.017	541.41592	-0.042773	0.57197	-0.60107	-13.045	-37.634	1396.819	-1.2358	1.313	-1.0327	-23.134	59.831	1414.045	-0.88965	1.4082	-1.4375	-33.1612	15.9909	79.4865	0.082618	0.81485	-0.47539
0.436	-72.735	-7.397	516.9507	-0.033789	0.53994	-0.58389	23.334	-38.6473	1361.9686	-1.1953	1.2754	-1.0039	-25.936	28.6915	1374.859	-0.86816	1.377	-1.4023	-42.477	-6.429	114.951	0.077148	0.81944	-0.50147
0.438	-87.8837	-9.3714	498.5109	-0.028809	0.50723	-0.56465	-1.99	-57.064	1341.908	-1.1753	1.2583	-0.99365	-62.7618	19.662	1341.44	-0.85034	1.343	-1.3699	-8.859	32.8704	150.642	0.048239	0.81435	-0.54757
0.44	-77.968	-10.2981	481.2077	-0.020508	0.47754	-0.54443	-24.9109	-42.508	1320.959	-1.1382	1.2134	-0.96045	-21.078	66.548	1322.1055	-0.83154	1.313	-1.3394	-41.377	23.2	335.4	-0.0080122	0.77949	-0.61817
0.442	-74.57	-0.1758	455.9041	-0.021485	0.45322	-0.52578	-41.213	-26.359	1298.2355	-1.1008	1.175	-0.9392	-23.551	62.868	1309.748	-0.8042	1.2544	-1.2954	-84.3813	65.6405	550.739	-0.095215	0.72266	-0.69727
0.444	-80.488	1.1161	435.169	-0.023145	0.42666	-0.50928	-24.72558	2.253	1265.2525	-1.0664	1.1289	-0.91504	-52.8225	78.344	1298.855	-0.78955	1.2271	-1.271	-133.2598	34.842	816.582	-0.24558	0.67384	-0.79784
0.446	-91.2782	4.99997	418.7768	-0.023926	0.40127	-0.49365	-13.827	12.089	1217.475	-1.0205	1.0762	-0.88184	-3.681	108.4184	1276.133	-0.77051	1.1758	-1.2324	-26.41	37.7259	1056.901	-0.47405	0.64189	-0.9151
0.448	-75.9543	3.3364	399.0149	-0.027734	0.38379	-0.47998	-13.764	46.03451	1177.3894	-0.99902	1.0469	-0.86816	-26.2775	106.4026	1242.6685	-0.74903	1.1338	-1.2007	-54.7827	-3.004	1322.092	-0.78886	0.654	-1.0616
0.45	-80.99317	4.7266	390.4476	-0.027832	0.36328	-0.46387	-30.794	64.261	1148.2342	-0.94434	0.98633	-0.83008	-61.951	132.132	1203.5462	-0.73535	1.0938	-1.1738	-95.509	-8.0696	1560.393	-1.166	0.69032	-1.1739
0.452	-68.751	6.8239	371.7011	-0.030566	0.34053	-0.44404	-49.3292	98.486	1134.4096	-0.90747	0.94409	-0.80445	-34.9183	159.295	1164.3712	-0.69873	1.0376	-1.1323	-69.8873	-51.829	1648.807	-1.5874	0.7876	-1.2905
0.454	-78.058	5.8046	358.9665	-0.032813	0.31983	-0.42696	-58.006	104.748	1118.0338	-0.86914	0.90039	-0.77441	-77.9716	154.304	1140.1901	-0.6792	1.0122	-1.1089	-111.7434	-98.112	1670.564	-1.9749	0.937	-1.3729
0.456	-70.456	24.9866	348.7075	-0.030859	0.2874	-0.40469	-28.504	96.556	1090.619	-0.8208	0.84033	-0.74365	-69.79688	165.777	1099.379	-0.64453	0.95508	-1.0645	-108.341	-66.664	1602.494	-2.2415	1.1587	-1.4278
0.458	-81.2396	32.4782	319.383	-0.034082	0.27119	-0.38809	-13.0144	64.1033	1026.028	-0.80469	0.81055	-0.72852	-36.9897	164.647	1048.2994	-0.61987	0.91528	-1.029	-28.3108	-99.967	1626.824	-2.2754	1.3835	-1.4102
0.46	-69.172	34.0514	315.7665	-0.040039	0.25391	-0.37793	-6.7458	70.0923	980.755	-0.75977	0.75195	-0.69678	-53.013	144.259	1022.6561	-0.58789	0.875	-0.99609	-33.139721	-87.687	1647.54	-2.0921	1.5792	-1.419
0.462	-59.645	36.339	317.63631	-0.040235	0.23535	-0.35537	-32.9595	85.4932	942.212	-0.72534	0.70727	-0.65796	-15.6329	166.272	1002.4774	-0.54688	0.81641	-0.95117	-75.279	-168.831	1628.755	-1.7461	1.7012	-1.4434
0.464	-77.59	32.554	309.7856	-0.04248	0.21621	-0.34072	-20.63	102.3844	924.428	-0.69922	0.66406	-0.63281	12.769	169.98572	961.2677	-0.52979	0.7876	-0.91943	0.725000000000001	-232.271	1544.3913	-1.2941	1.7274	-1.3994
0.466	-70.106	45.947	294.75136	-0.046777	0.20098	-0.33057	-27.1855	113.7326	898.73	-0.6626	0.60596	-0.58154	-15.5288	161.773	924.01748	-0.49609	0.72656	-0.87598	62.152	-398.73	1422.7903	-0.90228	1.6835	-1.2992
0.468	-82.048	57.081	264.495	-0.047461	0.1836	-0.31777	-25.498	117.6477	863.958	-0.64258	0.58105	-0.56982	26.188	168.736	866.8096	-0.46679	0.69336	-0.84814	161.47	-345.12	1390.0455	-0.65805	1.5949	-1.198
0.47	-78.553	51.6	267.9993	-0.047363	0.1748	-0.31738	9.6287	89.6114	836.364	-0.60693	0.5376	-0.55029	16.3719	157.831	835.0175	-0.44873	0.65479	-0.81494	149.358	-276.2	1430.12	-0.5476	1.4764	-1.123
0.472	-70.489	39.4231	261.4764	-0.051074	0.1624	-0.30205	6.1248	83.1115	785.3283	-0.55273	0.4834	-0.52344	0.356999999999999	147.7414	832.3471	-0.42529	0.61377	-0.77246	81.634	-140.917	1457.869	-0.53467	1.3442	-1.103
0.474	-52.554	34.2646	241.9852	-0.050098	0.14824	-0.29111	19.8796	101.74797	753.928	-0.51318	0.45654	-0.50146	39.3586	177.0977	811.229	-0.4082	0.58887	-0.75098	15.5417	-126.14	1460.051	-0.65123	1.2496	-1.1363
0.476	-43.096	28.8802	251.7214	-0.05127	0.13145	-0.2751	12.783	110.1717	723.379	-0.45898	0.4043	-0.46191	27.0024	167.876	780.624	-0.38867	0.54785	-0.71582	51.9035	-139.23	1461.534	-0.83208	1.1836	-1.1615
0.478	-66.773	39.8882	237.2873	-0.054297	0.11494	-0.26494	30.015	112.0839	686.9142	-0.42993	0.37231	-0.4436	2.7839	167.8929	741.2149	-0.3667	0.5127	-0.68457	66.395	-174.11	1493.6696	-1.0496	1.127	-1.172
0.48	-39.072	29.45136	225.6832	-0.05957	0.10205	-0.25586	14.3866	122.847	648.7783	-0.40479	0.31689	-0.40967	30.5283	175.5953	693.2806	-0.3418	0.4751	-0.64746	58.4371	-191.963	1532.385	-1.2315	1.0907	-1.209
0.482	-60.483	40.8342	215.6053	-0.062988	0.10303	-0.25537	23.5099	109.451	623.05	-0.38379	0.2583	-0.36865	2.307	146.2384	647.6325	-0.30566	0.43701	-0.61914	36.8882	-225.993	1534.582	-1.3457	1.0898	-1.2715
0.484	-67.967	42.1659	227.906	-0.067676	0.092676	-0.25156	28.999	103.112	592.7436	-0.375	0.23145	-0.35791	-13.567	153.8578	608.8114	-0.2876	0.41406	-0.60449	-3.1268	-313.527	1538.329	-1.3789	1.125	-1.3476
0.486	-52.215	36.8081	223.173193	-0.066504	0.08916	-0.24531	24.4846	122.605	575.7003	-0.35693	0.17236	-0.33008	47.76947	161.3429	565.108	-0.25	0.36133	-0.55859	-9.99999999997669e-05	-408.684	1549.438	-1.3653	1.1842	-1.4073
0.488	-37.77	30.04502	201.362	-0.068164	0.077636	-0.23213	25.5393	132.2112	523.91682	-0.344	0.14966	-0.32227	14.032	151.4017	534.982	-0.22193	0.32691	-0.52686	88.447	-477.363	1580.455	-1.3162	1.2426	-1.443
0.49	-64.888	30.4739	194.613	-0.065918	0.075684	-0.22461	15.9253	112.565	473.1143	-0.32617	0.12012	-0.30664	1.731	160.1709	496.251	-0.19531	0.29883	-0.5	138.873	-458.6	1567.758	-1.2434	1.338	-1.5092
0.492	-95.2345	50.0831	195.6348	-0.065039	0.066309	-0.22295	-7.6474	113.094	429.5113	-0.29199	0.099121	-0.29297	16.565	157.862	459.093	-0.1665	0.26465	-0.46973	120.054	-475.53	1587.412	-1.1914	1.3574	-1.543
0.494	-66.631	50.482	191.2568	-0.0625	0.056738	-0.21299	2.053	102.9958	427.3461	-0.27441	0.086914	-0.28027	-31.3605	165.5716	437.346	-0.15039	0.23633	-0.44727	67.926	-390.37	1688.784	-1.2014	1.3308	-1.5347
0.496	-56.38	57.7439	168.8511	-0.060938	0.050879	-0.21572	15.5606	95.8923	424.9868	-0.22998	0.060059	-0.2583	-6.412	185.271	435.7884	-0.11621	0.20313	-0.40771	-6.1022	-343.226	1772.76	-1.2748	1.3253	-1.5309
0.498	-59.273	50.5967	174.065	-0.065039	0.041797	-0.20703	14.8005	108.7983	401.9738	-0.20019	0.062256	-0.25782	-6.226	179.941	405.2809	-0.088868	0.177	-0.37988	-39.3244	-290.985	1840.402	-1.4055	1.3611	-1.5703
0.5	-69.705	41.7285	177.455	-0.067383	0.043945	-0.20215	-31.805	120.702	373.4252	-0.1748	0.057617	-0.2666	-48.9493	165.335	394.1056	-0.06543	0.14893	-0.35107	-53.858	-256.981	1840.026	-1.5368	1.424	-1.6192
0.502	-47.234	37.88218	189.5597	-0.071875	0.038574	-0.19668	-11.036	120.817	356.538	-0.13428	0.034668	-0.22607	-34.2705	158.237	343.126	-0.030762	0.12158	-0.31836	-105.3679	-218.891	1801.155	-1.646	1.5063	-1.6851
0.504	-35.301	49.2885	181.124	-0.073144	0.031543	-0.19258	-49.986	103.3321	339.178	-0.11719	0.035645	-0.22363	-49.5173	146.339	305.815	-0.01709	0.10986	-0.30811	-149.931	-119.435	1762.0681	-1.6969	1.5971	-1.7596
0.506	-44.815	50.0067	172.9919	-0.072754	0.022168	-0.18984	-64.281	105.3855	311.507	-0.087402	0.018066	-0.21289	-74.0539	138.966	303.63864	0.010742	0.079102	-0.26807	-131.687	-22.04	1725.731	-1.714	1.6742	-1.8442
0.508	-79.0842	47.688	178.79138	-0.070312	0.019629	-0.1876	-22.4991	90.628	270.615968	-0.06958	0.0017091	-0.20288	-41.909	128.41956	283.0279	0.033691	0.056641	-0.25171	-98.702	52.776	1701.209	-1.6991	1.7759	-1.8886
0.51	-78.0371	42.4838	178.6919	-0.071289	0.010254	-0.18799	-30.46274	72.383	230.0866	-0.045898	-0.0068359	-0.18945	-52.1514	108.1465	255.4097	0.043945	0.044434	-0.24121	-29.42882	-6.8617	1698.213	-1.6435	1.8462	-1.9211
0.512	-34.901	55.242	175.8991	-0.067481	0.0035156	-0.17178	-53.115	63.851	211.254	-0.023438	-0.025879	-0.17871	-61.7789	104.8795	235.727	0.058594	0.019043	-0.21045	-1.669	-61.03	1726.042	-1.5449	1.8984	-1.916
0.514	-53.622	52.1537	182.2948	-0.06709	-0.0072265	-0.17217	-55.0052	59.849	211.065	-0.01709	-0.023438	-0.18164	-27.899	91.396	225.042	0.068115	0.0012207	-0.19898	-19.224	-111.732	1774.368	-1.442	1.9003	-1.8728
0.516	-58.2339	45.1656	210.14863	-0.069043	-0.0041016	-0.17686	-32.6935	67.686	199.462	0.0039063	-0.03418	-0.17627	-27.678	76.508	216.4758	0.074219	-0.0073242	-0.18066	-52.754	-41.6691	1803.115	-1.3708	1.8564	-1.8162
0.518	-39.895	35.6001	208.3422	-0.070117	-0.0074219	-0.17324	-62.338	76.664	191.9308	0.025391	-0.033203	-0.16846	-39.973	86.84361	196.2992	0.086914	-0.022461	-0.16553	-60.5412	1.1843	1803.8253	-1.3312	1.7671	-1.7366
0.52	-38.458	50.482	194.1063	-0.081055	-0.01123	-0.17383	-20.3802	62.1622	186.4664	0.037109	-0.02832	-0.18018	-13.392	100.2948	158.7172	0.092285	-0.02832	-0.16309	-87.003	19.9239	1748.877	-1.314	1.666	-1.6636
0.522	-56.944	57.1476	189.4982	-0.079492	-0.018945	-0.16953	-14.2946	62.955	164.4426	0.068848	-0.037109	-0.17236	-42.141	107.712	131.3225	0.10449	-0.035645	-0.15527	-123.423	-50.245	1725.611	-1.3125	1.5664	-1.5967
0.524	-48.666	61.316	197.1717	-0.083399	-0.024707	-0.16885	-46.256	77.052	142.1593	0.07959	-0.035645	-0.16943	-28.238	105.896	123.8499	0.11353	-0.043457	-0.14746	-102.555	-105.504	1799.786	-1.3007	1.4963	-1.5539
0.526	-20.838	56.808	202.5113	-0.087305	-0.027832	-0.1708	-28.626	74.449	117.3421	0.11035	-0.04248	-0.16748	-10.271	110.686	113.7773	0.11914	-0.046875	-0.14014	-117.573	-92.851	1812.955	-1.2774	1.4472	-1.5308
0.528	-39.178	68.0069	198.5397	-0.095117	-0.031152	-0.17559	-0.626999999999999	66.5377	108.0957	0.13526	-0.039062	-0.15601	-37.5	105.336	117.1637	0.13525	-0.045898	-0.13721	-81.5229	-80.416	1808.738	-1.234	1.4171	-1.5124
0.53	-41.876	56.7732	221.8005	-0.10059	-0.033203	-0.18213	-14.46	47.6135	83.04521	0.15674	-0.04541	-0.15381	-3.084	94.6725	82.35307	0.13916	-0.044434	-0.1333	-19.2418	-38.9004	1675.5882	-1.185	1.3934	-1.4891
0.532	-56.373	45.440588	241.2182	-0.1041	-0.030762	-0.1874	-14.535	36.7554	61.151	0.16992	-0.041016	-0.1626	-5.517	84.0106	62.6452	0.14648	-0.040527	-0.12256	-3.6303	-76.714	1603.0879	-1.1382	1.3677	-1.4683
0.534	-53.694	38.363	239.797	-0.10694	-0.027344	-0.19092	10.045	28.0509	49.854	0.17725	-0.04541	-0.16162	-20.052	69.998	51.9299	0.15577	-0.043457	-0.11987	30.2077	-31.636	1538.17	-1.0992	1.3371	-1.443
0.536	-45.614	48.885	239.4438	-0.11553	-0.023437	-0.20498	9.115	37.4568	48.299	0.20947	-0.0625	-0.13623	12.096	75.052	23.221	0.16602	-0.046875	-0.1084	64.068	-41.467	1518.0003	-1.0664	1.2977	-1.4164
0.538	-49.369	65.222	238.4663	-0.11592	-0.01836	-0.2127	-7.716	38.3768	53.741	0.21728	-0.056397	-0.13623	-13.206	62.238	12.9341	0.18115	-0.048828	-0.10107	73.6637	52.6623	1516.314	-1.0289	1.2524	-1.3836
0.54	-51.271	71.837	237.7717	-0.11719	-0.0087891	-0.22119	11.136	34.7449	44.8235	0.22119	-0.056152	-0.1416	-13.227	50.368	15.3742	0.18457	-0.055664	-0.091309	54.47	102.438	1474.549	-0.99093	1.2099	-1.3589
0.542	-49.574	68.475	244.0326	-0.12393	0.0019532	-0.22548	-14.814	24.4478	18.51995	0.22656	-0.050781	-0.13037	2.496	45.6616	27.6964	0.19629	-0.058594	-0.088867	67.952	158.389	1420.687	-0.95898	1.1699	-1.332
0.544	-48.252	57.4778	258.90425	-0.12578	0.0083008	-0.23789	1.905	31.276	6.3252	0.22461	-0.051758	-0.12744	-39.2245	29.55757	35.0395	0.2107	-0.058106	-0.082764	21.6231	182.393	1351.366	-0.93828	1.133	-1.3076
0.546	-70.6285	58.5446	275.3606	-0.13164	0.023144	-0.25117	14.08	33.583	11.9813	0.23291	-0.060059	-0.10791	-46.422	20.797	48.5252	0.2207	-0.063477	-0.07666	-18.822	216.541	1338.076	-0.92295	1.0972	-1.2757
0.548	-42.435	54.398	302.5536	-0.13399	0.036426	-0.25967	-14.581	26.2343	14.3651	0.23242	-0.060547	-0.10474	-21.234	24.0083	34.351	0.23828	-0.084473	-0.049316	-3.569	230.43	1319.349	-0.92139	1.0628	-1.246
0.55	-58.0776	51.977	301.633	-0.14648	0.04541	-0.27148	-26.6388	31.762	28.097	0.23291	-0.072754	-0.088379	-39.493	18.71849	43.89	0.24658	-0.088379	-0.039063	0.577999999999999	202.297	1302.965	-0.90693	1.0259	-1.2139
0.552	-65.088	49.9546	315.867	-0.15332	0.060156	-0.27715	-17.1697	27.8597	21.406	0.23389	-0.081543	-0.07959	-56.0789	23.399	38.5409	0.25195	-0.093262	-0.035645	12.6268	211.553	1228.7947	-0.87891	0.98828	-1.1797
0.554	-57.709	50.0381	327.1561	-0.1665	0.072657	-0.28701	-6.1477	2.14	7.0987	0.23535	-0.082031	-0.084473	-30.5214	27.3098	11.3953	0.2583	-0.095947	-0.025391	8.802	164.15	1195.3119	-0.84385	0.95537	-1.1489
0.556	-47.405	69.303	311.6306	-0.18838	0.091406	-0.29639	-28.0126	0.0920999999999994	1.369	0.23242	-0.089355	-0.074707	-61.282	21.8239	17.8812	0.26074	-0.099609	-0.020508	-11.5648	168.375	1164.4288	-0.78975	0.91807	-1.1147
0.558	-60.308	90.986	322.3773	-0.20849	0.10459	-0.30547	-35.5224	17.1252	10.3927	0.23316	-0.093262	-0.063232	-23.521	14.579	7.832	0.26416	-0.10254	-0.01709	-5.904	125.922	1148.4966	-0.73037	0.87588	-1.0819
0.56	-78.1741	86.537	337.8878	-0.22656	0.11719	-0.31445	-25.7642	15.2126	1.1227	0.24072	-0.094238	-0.0625	-18.568	20.826	21.0255	0.26953	-0.10791	-0.01709	17.231	152.35	1103.1756	-0.67754	0.825	-1.0445
0.562	-69.164	72.8378	354.5314	-0.2416	0.13535	-0.32344	-29.049	24.7142	-15.9554	0.23242	-0.086426	-0.062988	-56.7971	25.612	40.3948	0.27051	-0.12109	-0.0058594	28.1358	143.7	1057.619	-0.63574	0.77734	-1.0146
0.564	-66.151	64.6377	377.535	-0.25264	0.14903	-0.3335	-38.828	26.688	-13.5373	0.23096	-0.089844	-0.056152	-21.149	40.9364	12.3089	0.27124	-0.12646	-0.0078125	18.3569	195.892	1013.0379	-0.60069	0.73984	-0.9836
0.566	-65.4401	69.157	392.3125	-0.26162	0.16816	-0.34248	-34.885	13.9381	11.0854	0.2168	-0.086914	-0.058105	-36.154	38.4933	10.393	0.26904	-0.13135	-0.0087891	-7.987	231.672	980.675	-0.55849	0.69346	-0.94521
0.568	-52.946	67.31	410.29363	-0.26905	0.18262	-0.34873	-33.9283	8.183	8.9049	0.20313	-0.087402	-0.054687	-66.9497	24.0559	34.88439	0.26367	-0.13037	-0.016602	-60.123	283.114	959.091	-0.51787	0.64815	-0.92021
0.57	-42.202	71.1271	404.43477	-0.27344	0.19531	-0.36914	-26.3131	21.079	20.7036	0.18848	-0.084473	-0.052734	-37.171	29.2109	23.399	0.26025	-0.12793	-0.022949	-42.5821	315.206	891.81904	-0.45908	0.57979	-0.86767
0.572	-54.309	70.74	401.2536	-0.27979	0.20811	-0.37276	-29.3275	27.5706	22.7975	0.15869	-0.08252	-0.050293	-46.419	32.7584	24.4147	0.26025	-0.12744	-0.030762	-23.9789	300.071	859.6322	-0.4082	0.53516	-0.83789
0.574	-84.5415	82.172	417.6469	-0.28604	0.23115	-0.3835	-31.1861	31.226	28.48	0.14697	-0.080566	-0.050293	-35.9315	25.3402	28.9445	0.25317	-0.12231	-0.035889	-24.1703	319.453	766.788	-0.37275	0.50996	-0.83067
0.576	-61.682	79.423	437.61564	-0.29268	0.25146	-0.3956	-30.6072	34.699	8.2581	0.12549	-0.075195	-0.058594	-11.588	37.2395	16.452	0.24805	-0.11133	-0.045898	-23.018	273.582	756.6282	-0.32773	0.45391	-0.78907
0.578	-42.593	67.464	462.8141	-0.30235	0.27021	-0.40342	-17.6541	34.478	-7.639	0.12011	-0.062988	-0.051026	-28.023	36.1972	25.3484	0.24121	-0.09375	-0.058594	-24.8257	317.849	687.315	-0.28437	0.41172	-0.75547
0.58	-63.078	63.68645	472.4151	-0.31299	0.29248	-0.41504	-7.1149	19.4416	-18.30529	0.11426	-0.048828	-0.055664	-21.357	24.0865	20.3458	0.23779	-0.08252	-0.062012	0.499799999999999	251.4443	646.802	-0.2416	0.35879	-0.71895
0.582	-91.168	51.6014	492.8599	-0.32285	0.31191	-0.41738	-1.663	26.2223	-1.4659	0.1167	-0.029785	-0.05127	36.7762	24.692	12.3837	0.23926	-0.059082	-0.073242	25.596	255.1788	559.111	-0.19922	0.31934	-0.68066
0.584	-70.614	61.3333	504.8197	-0.34102	0.3336	-0.42461	-10.71702	31.401961	13.582	0.12451	-0.018066	-0.056152	-9.776	0.743999999999998	19.547	0.24146	-0.042969	-0.078858	24.6936	193.811	492.763	-0.17403	0.29072	-0.65332
0.586	-63.355	67.8738	510.8945	-0.35898	0.35742	-0.43672	26.9553	26.5167	6.6474	0.13232	-0.0014648	-0.056641	-16.186	3.2883	32.5571	0.24072	-0.026855	-0.086426	31.5331	202.288	444.066	-0.14697	0.27539	-0.63516
0.588	-85.2694	81.0063	498.5305	-0.3749	0.38389	-0.4458	9.5372	19.6421	12.0831	0.13648	0.0058594	-0.059082	32.101	21.513	11.5031	0.24854	-0.0087891	-0.097656	24.6441	218.841	468.277	-0.11377	0.22383	-0.59024
0.59	-54.296	78.3461	519.2575	-0.38721	0.40039	-0.45117	13.7066	18.8045	26.93595	0.14453	0.011719	-0.050781	-19.998	22.481	26.5625	0.24658	0.003418	-0.097168	8.554	221.484	490.647	-0.081055	0.20068	-0.56055
0.592	-84.469	81.02	542.6652	-0.40059	0.41728	-0.44922	16.3662	14.752025	38.332	0.146	0.018066	-0.053711	-15.166	34.563	26.0331	0.25537	0.015137	-0.10449	2.3381	206.447	468.463	-0.060059	0.17773	-0.55859
0.594	-81.899	82.31	556.007	-0.41133	0.43848	-0.4586	5.418	24.509	30.191	0.15186	0.016602	-0.053223	-4.418	40.704	15.156	0.26026	0.022217	-0.10401	16.981	135.8989	413.578	-0.025683	0.13476	-0.53154
0.596	-76.502	86.0236	556.523	-0.41172	0.45293	-0.47227	-0.0510000000000002	32.1188	12.62216	0.15039	0.018066	-0.047363	-37.4962	31.763	30.8458	0.26563	0.023926	-0.11084	15.7464	141.307	320.05	-0.0047852	0.13418	-0.53926
0.598	-80.57	72.01501	600.51608	-0.40889	0.46455	-0.47822	6.935	21.0522	15.47959	0.15503	0.018066	-0.04834	-14.441	39.282	10.331	0.27051	0.021973	-0.11133	35.2359	129.6069	303.9869	0.006543	0.10527	-0.53066
0.6	-83.969	70.3635	616.282	-0.4043	0.47754	-0.48438	-9.0252	21.0836	29.87	0.15674	0.0058594	-0.049805	-17.246	41.862	14.555	0.26807	0.023438	-0.11523	25.1796	200.152	281.5574	0.030762	0.058398	-0.48828
0.602	-77.17	77.7477	606.8779	-0.38916	0.48603	-0.49737	-24.5766	10.12	12.507	0.15723	-0.00048828	-0.043945	-43.053	29.847	34.1476	0.27344	0.021484	-0.11377	-10.785	157.6859	244.655	0.032227	0.05127	-0.48486
0.604	-91.2691	93.0769	600.2479	-0.38506	0.50176	-0.50547	-4.372	7.827	15.097	0.16064	-0.0068359	-0.041504	-8.716	31.658	13.2547	0.27075	0.016113	-0.11938	10.349	125.7414	179.461	0.022266	0.042188	-0.50049
0.606	-120.5398	100.877	614.3071	-0.37647	0.51426	-0.51836	-12.703	13.885	6.379	0.15918	-0.014648	-0.038086	-25.273	27.3824	7.72	0.27295	0.015137	-0.11865	23.665	79.448	128.374	0.014844	0.038477	-0.50078
0.608	-94.634	103.353	644.4223	-0.37119	0.52676	-0.52666	-32.2037	22.51239	4.5517	0.15723	-0.020996	-0.041504	-52.0148	28.5512	5.3628	0.26953	0.0092773	-0.12842	15.74469	99.116	133.703	0.007422	0.027539	-0.49375
0.61	-94.098	106.1318	632.351	-0.37109	0.53857	-0.5332	-18.76664	21.0083	18.9654	0.16064	-0.03125	-0.039063	-32.8756	39.5897	19.458	0.27002	0.0068359	-0.12988	-0.612	146.918	151.4575	-0.0050781	0.0017576	-0.47696
0.612	-91.602	103.8026	660.6269	-0.37276	0.54756	-0.54404	-7.496	19.57092	32.919	0.16406	-0.038574	-0.040527	-37.402	31.9774	41.39394	0.27051	0.012207	-0.13867	-31.768	167.90426	141.483043	-0.019043	-0.011719	-0.45557
0.614	-97.7004	98.0494	679.3347	-0.37724	0.56015	-0.55898	-44.5419	23.2709	12.7812	0.16626	-0.041748	-0.046387	-62.356	29.4604	43.3424	0.26928	0.011963	-0.14649	-52.8579	146.0658	73.396	-0.042481	-0.0039063	-0.46103
0.616	-74.35	86.1265	695.9525	-0.37919	0.56523	-0.56445	-20.28	14.0812	23.44631	0.16748	-0.046387	-0.053223	-40.018	28.4349	11.8245	0.2666	0.016113	-0.15527	-48.2184	83.7969	52.944	-0.074316	0.013379	-0.45381
0.618	-78.279	92.3009	682.994	-0.38437	0.57793	-0.57383	-33.2326	3.693	13.6556	0.1665	-0.046875	-0.060059	-48.7602	8.14505	13.5821	0.26367	0.021484	-0.17188	-63.517	100.6991	49.579	-0.10947	0.03877	-0.44404
0.62	-93.31	104.3743	702.357	-0.38916	0.59229	-0.58496	-51.5686	19.8644	12.0736	0.16992	-0.046387	-0.067871	-62.3306	4.3334	34.9803	0.25879	0.023438	-0.18359	-61.3227	71.9619	103.14	-0.13691	0.076465	-0.43779
0.622	-82.502	114.905	711.263	-0.39268	0.60616	-0.59913	-40.685	9.8026	7.657	0.1709	-0.038574	-0.080078	-19.831	19.673	32.377	0.24463	0.031738	-0.20068	-58.7266	118.185	99.596	-0.16113	0.10645	-0.43262
0.624	-94.548	108.881	714.011	-0.39649	0.62355	-0.61515	-20.2665	2.5209	9.948	0.17163	-0.032715	-0.089843	-33.8093	38.431	22.7284	0.22437	0.04004	-0.22315	-79.968	76.0149	92.504	-0.16983	0.12695	-0.4208
0.626	-104.226	114.181	716.6807	-0.40587	0.64075	-0.63077	-46.854	7.5191	12.6532	0.16553	-0.024902	-0.098145	-28.856	35.631	31.0315	0.20166	0.047852	-0.24609	-82.227	58.2386	37.961	-0.1669	0.14053	-0.40439
0.628	-105.778	118.229527	723.673	-0.4126	0.65676	-0.64836	-18.3958	9.39253	15.9534	0.15869	-0.0063477	-0.12207	-9.27	10.734	50.9988	0.14844	0.05957	-0.27686	-60.087	6.749	22.991	-0.15908	0.14092	-0.39228
0.63	-81.326	124.9861	746.6328	-0.4248	0.68164	-0.67285	8.291	6.3635	15.8752	0.15283	0	-0.12842	-39.531	-0.754099999999999	64.3737	0.12256	0.067871	-0.28857	-38	10.514	11.157	-0.15019	0.13535	-0.36641
0.632	-72.922	124.8809	748.36927	-0.43368	0.70124	-0.68855	-27.661	21.5053	5.1733	0.14209	0.021973	-0.14209	-8.82	-5.2309	71.9109	0.067383	0.088867	-0.32666	-34.082	7.029	15.633	-0.14893	0.12012	-0.34961
0.634	-104.4595	135.5074	735.8553	-0.4421	0.72338	-0.71226	-10.0355	24.47	14.9037	0.13526	0.039063	-0.15357	-4.125	-10.6701	69.5547	0.018067	0.10962	-0.34765	-24.996	8.253	22.656	-0.16006	0.104	-0.32949
0.636	-69.188	126.83995	730.9758	-0.46515	0.74637	-0.7298	19.731	11.7948	17.5282	0.12549	0.057617	-0.16113	-19.281	-33.5741	115.6108	-0.023438	0.13867	-0.37695	-29.872	15.3902	6.963	-0.17227	0.091015	-0.30547
0.638	-73.285	139.008	748.29993	-0.47611	0.76459	-0.74878	-1.334	-0.8605	13.2586	0.10938	0.07959	-0.17578	3.797	-43.7314	124.5731	-0.078613	0.17236	-0.42334	-41.124	4.8726	7.875	-0.18008	0.079687	-0.28399
0.64	-77.543	149.203	761.704	-0.49658	0.7876	-0.76416	-6.767	7.05652	9.208	0.10059	0.09082	-0.18408	12.752	-47.6891	151.9629	-0.10303	0.18018	-0.44873	-1.6684	53.787	16.1917	-0.17627	0.068457	-0.2583
0.642	-85.985	154.317	766.5563	-0.51932	0.80854	-0.78473	11.8558	-0.1437	7.102	0.088379	0.11426	-0.19336	0.51	-12.20571	207.4027	-0.17969	0.16943	-0.51416	-5.107	36.5668	68.749	-0.16748	0.05957	-0.23291
0.644	-82.208	145.8795	780.2303	-0.53451	0.82955	-0.79452	1.14	4.6879	-10.4124	0.079101	0.12451	-0.20142	33.547	23.766	294.149	-0.26587	0.17017	-0.57593	-14.167	88.52	65.252	-0.14229	0.050683	-0.21074
0.646	-91.23	136.0772	783.669	-0.55631	0.8483	-0.80699	-5.5566	25.468	9.797	0.067383	0.13672	-0.20801	27.1918	58.2994	440.774	-0.39404	0.18848	-0.64404	-5.736	50.406	48.629	-0.10713	0.04082	-0.18711
0.648	-85.232	142.661	769.107	-0.57673	0.86993	-0.82557	21.4592	28.872	9.8728	0.047363	0.14844	-0.21826	1.6963	67.424	542.811	-0.64502	0.23438	-0.74707	-2.8404	57.539	2.108	-0.064942	0.032617	-0.16641
0.65	-91.221	160.1056	765.8799	-0.59033	0.87842	-0.8374	11.8652	24.5277	1.36798	0.041992	0.15625	-0.22217	42.256	61.285	640.209	-0.87134	0.29492	-0.83374	7.652	10.57596	-6.164	-0.027539	0.025586	-0.15606
0.652	-105.6499	177.4453	763.7769	-0.61103	0.8837	-0.85016	-4.118	24.1912	2.6665	0.017578	0.16895	-0.23389	62.37	62.0886	756.811	-1.1118	0.35791	-0.89404	34.802	-0.5547	5.34252	0.0063477	0.040039	-0.16162
0.654	-92.649	178.286	764.9773	-0.62694	0.8925	-0.86311	10.639	24.693	19.3361	0.0007324	0.17895	-0.24096	44.062	71.8035	900.4377	-1.4565	0.5415	-1.0405	26.512	-15.9218	16.4792	0.057129	-0.011719	-0.11484
0.656	-95.3545	168.977	754.8319	-0.644	0.8904	-0.87113	-10.8799	12.2259	10.1878	-0.015137	0.18604	-0.24756	49.209	70.912	1001.4324	-1.6055	0.64063	-1.1094	-0.437000000000001	-8.899	-12.1382	0.11699	-0.047949	-0.06377
0.658	-87.187	172.0225	774.5974	-0.65878	0.88967	-0.87726	-17.7079	11.6036	16.27238	-0.052734	0.18848	-0.2627	-11.672	59.467	1044.42	-1.8257	0.88916	-1.2241	17.8795	2.8437	-3.1196	0.14824	-0.041309	-0.077051
0.66	-86.256	171.9009	797.3592	-0.67676	0.88379	-0.88086	-0.599	21.52065	12.927	-0.076172	0.1958	-0.27002	-16.34426	11.642	1053.442	-1.876	1.1289	-1.3135	3.735	-13.2544	17.7226	0.18291	-0.061035	-0.065625
0.662	-64.161	174.9956	806.2706	-0.68816	0.87457	-0.8866	-4.7522	17.3555	28.853	-0.15283	0.18799	-0.28467	10.5618	-28.929	1061.541	-1.8516	1.3613	-1.4141	-15.942	11.837	33.0415	0.22998	-0.08252	-0.040039
0.664	-73.025	174.5035	790.768	-0.70351	0.86346	-0.89322	-44.707	17.89386	55.223	-0.23438	0.17529	-0.30981	-3.561	-79.044	1113.84	-1.7012	1.5586	-1.543	-3.12	-8.811	71.517	0.26504	-0.10674	-0.0073242
0.666	-105.8464	185.1079	768.871	-0.71625	0.84958	-0.89831	-25.4848	40.656	107.158	-0.33057	0.1499	-0.33545	-27.138	-95.563	1124.469	-1.5684	1.5801	-1.5742	-37.2842	39.98994	35.297	0.29121	-0.11103	-0.0085938
0.668	-90.128	179.236	775.3303	-0.73102	0.83519	-0.91239	-9.497	63.939	132.6878	-0.51123	0.14453	-0.40186	-51.6901	-90.629	1107.1024	-1.1636	1.4185	-1.5308	-53.0363	13.689	12.852	0.30684	-0.11963	-0.010937
0.67	-96.841	191.823	762.5195	-0.74805	0.82129	-0.9248	-21.247	66.194	197.1028	-0.62109	0.13184	-0.43359	-51.513	-92.709	1133.005	-0.82691	1.1658	-1.4226	-39.1439	36.7159	-21.846	0.31904	-0.11221	-0.022559
0.672	-88.618	196.75	768.3836	-0.76197	0.81183	-0.92905	-0.6371	79.4903	311.05	-0.89844	0.12402	-0.49023	-22.393	-85.775	1156.756	-0.55664	0.9541	-1.3467	-36.344	24.314	15.7607	0.34863	-0.17285	0.038574
0.674	-97.7375	187.4306	766.8818	-0.78003	0.80448	-0.93584	16.41597	80.1177	455.081	-1.1563	0.13794	-0.54346	-6.843	-81.243	1183.91792	-0.37451	0.81885	-1.3335	-39.349	41.5011	17.91398	0.36074	-0.16719	0.029687
0.676	-87.482	181.4626	785.1386	-0.79385	0.80645	-0.94109	11.523	92.8519	611.06	-1.4526	0.17627	-0.60498	-11.807	-87.067	1209.444	-0.34766	0.79883	-1.3398	-33.3469	32.756	27.4535	0.36055	-0.18349	0.02041
0.678	-73.662	181.082	776.141	-0.80246	0.80497	-0.9512	74.4454	70.5972	760.62	-1.8906	0.28809	-0.73438	-20.374	-58.585	1235.014	-0.31836	0.75146	-1.3301	-74.789	46.3118	-6.263	0.35938	-0.18233	0.0040038
0.68	-91.5513	202.283	762.9845	-0.80225	0.81104	-0.95557	62.47424	45.13253	907.3647	-2.1016	0.35254	-0.79297	-42.1386	-15.402	1261.177	-0.29566	0.71118	-1.3215	-79.918	51.4017	-26.2995	0.36133	-0.17695	-0.00058592
0.682	-63.333	196.1242	764.8216	-0.79356	0.81641	-0.95816	31.1559	38.0134	1046.2461	-2.4663	0.53857	-0.92432	-82.1419	26.509	1288.48	-0.26221	0.67383	-1.3203	-49.741	39.95653	7.744	0.3623	-0.17334	-0.00097656
0.684	-64.453	210.674	753.3714	-0.77612	0.82177	-0.96005	27.9659	35.2834	1105.5643	-2.615	0.7561	-0.98755	-46.538	32.869	1238.545	-0.22998	0.64502	-1.3335	-56.128	55.6474	17.824	0.35684	-0.16377	-0.0053711
0.686	-53.075	202.954	754.334	-0.74751	0.83014	-0.96655	11.7232	11.844	1145.8101	-2.7104	1.0591	-1.0562	-45.226	-42.069	1187.467	-0.21631	0.63623	-1.3374	-42.796	8.7445	27.176	0.36455	-0.16651	0.0097657
0.688	-91.1385	206.588	750.995	-0.72007	0.82904	-0.96474	16.39	3.945	1165.964	-2.7925	1.4829	-1.2388	-74.1217	-146.7325	1177.015	-0.21289	0.61865	-1.3354	-39.296	29.012	22.444	0.36494	-0.1583	0.0097657
0.69	-87.5572	189.6094	773.696	-0.6875	0.81836	-0.97168	19.9355	-16.504	1205.523	-2.791	1.6328	-1.3926	-45.2331	-185.45	1196.523	-0.23535	0.59961	-1.333	-56.585	-7.1171	25.019	0.3667	-0.15234	0.0066407
0.692	-75.795	177.889	779.414	-0.66428	0.80284	-0.97579	38.074	-32.319	1256.043	-2.4844	1.7109	-1.582	-75.888	-203.728	1263.9853	-0.28174	0.56641	-1.3398	-30.1871	51.502	25.3625	0.37305	-0.15771	0.01416
0.694	-74.484	172.998	765.35	-0.64931	0.77917	-0.97036	4.0785	-43.422	1306.9409	-2.0261	1.5779	-1.5222	-39.78393	-185.816	1275.5811	-0.39258	0.53516	-1.3457	18.793	44.592	48.666	0.37734	-0.15351	0.0071288
0.696	-98.258	192.884	793.163	-0.65011	0.75581	-0.97971	7.6418	-41.988	1364.606	-1.5703	1.3672	-1.4004	30.746	-177.592	1236.6537	-0.45264	0.53076	-1.3618	10.869	49.948	49.259	0.37783	-0.16113	0.0063476
0.698	-83.082	222.1788	793.39	-0.66858	0.72691	-0.98499	-1.482	-52.488	1385.431	-1.1523	1.1133	-1.3281	24.7809	-195.359	1236.713	-0.5957	0.56641	-1.4121	-3.6	24.4736	43.75	0.37588	-0.1709	-0.00029294
0.7	-42.025	231.95	833.72	-0.69141	0.70508	-0.99512	23.842	-51.677	1403.892	-1.0039	0.99609	-1.3145	34.1655	-182.592	1282.769	-0.69165	0.62622	-1.4695	-11.263	3.9258	17.23	0.36826	-0.17989	-0.0060546
0.702	-51.348	243.527	832.71	-0.71541	0.68692	-1.0096	27.499	-24.6958	1397.593	-0.80615	0.83252	-1.2788	37.88353	-161.749	1326.171	-0.77734	0.71875	-1.5361	3.0664	12.61471	-2.222	0.34961	-0.18555	-0.010254
0.704	-72.436	250.406	904.38	-0.74517	0.68194	-1.0319	-5.006	12.332	1436.2196	-0.74463	0.8125	-1.3008	15.3255	-140.7274	1384.21	-0.8667	0.8501	-1.6323	17.575	6.5727	13.978	0.32344	-0.18819	-0.017286
0.706	-64.97	261.389	983.6	-0.78892	0.68193	-1.0585	-61.1155	27.727	1483.9113	-0.72119	0.81836	-1.3262	9.7843	-108.072	1402.273	-0.91455	0.9126	-1.6812	23.1354	34.549	50.566	0.29062	-0.18242	-0.024121
0.708	-78.2108	269.47	1030.9	-0.83659	0.68154	-1.0911	-92.5998	25.293	1497.895	-0.70996	0.81445	-1.3242	34.4511	-103.379	1385.64	-0.97363	1.002	-1.7637	16.853	9.644	41.046	0.25274	-0.16875	-0.035449
0.71	-106.865	275.34	1076.55	-0.89258	0.68359	-1.1309	-104.04	-14.668	1464.56	-0.7168	0.79688	-1.3164	14.6155	-123.632	1344.4226	-1.0127	1.0391	-1.81	2.433	30.6791	-3.4057	0.2124	-0.15361	-0.045019
0.712	-117.718	278.281	1106.05	-0.95392	0.69238	-1.1678	-95.522	-78.387	1455.846	-0.74023	0.73242	-1.3008	8.2564	-103.442	1301.228	-1.0449	1.0605	-1.8594	-0.404	7.7677	12.8165	0.1748	-0.13184	-0.052734
0.714	-117.002	252.107	1160.89	-1.0288	0.71299	-1.2058	-106.347	-100.015	1445.132	-0.76977	0.69214	-1.2791	34.5677	-68.296	1275.624	-1.0542	1.0718	-1.9019	-7.92949	43.653	26.6366	0.14834	-0.11436	-0.063086
0.716	-139.554	235.9	1186.76	-1.1082	0.73995	-1.2429	-127.202	-94.477	1478.545	-0.80664	0.65723	-1.2598	13.3888	-72.738	1315.961	-1.0469	1.0762	-1.9277	0.893000000000001	12.39	63.845	0.12432	-0.099704	-0.079492
0.718	-122.51	201.4407	1202.34	-1.1833	0.77334	-1.2778	-107.466	-112.144	1502.08	-0.90527	0.62402	-1.2578	66.56	-89.187	1354.4835	-1.0132	1.0874	-1.9653	-11.973	16.871	34.596	0.11299	-0.087207	-0.094726
0.72	-111.835	155.332	1227.84	-1.2441	0.81641	-1.2969	-65.0567	-126.779	1493.3532	-0.96924	0.62646	-1.2671	72.717	-134.009	1376.128	-0.97754	1.0879	-1.9893	-11.08	-11.559	-5.6612	0.10361	-0.078027	-0.11026
0.722	-100.945	99.57	1263.42	-1.2743	0.86005	-1.3114	-42.2255	-146.348	1479.9938	-1.1128	0.61963	-1.2886	70.219	-154.337	1407.9815	-0.93604	1.0845	-2.0024	-32.1576	-9.012	-26.8111	0.10156	-0.068848	-0.12793
0.724	-88.599	57.47	1268.16	-1.2687	0.89844	-1.3152	-39.4226	-183.108	1495.5242	-1.2156	0.62525	-1.3064	103.262	-132.91	1407.4331	-0.89795	1.0747	-2.0181	-35.1319	3.79600000000001	-6.5695	0.09248	-0.066797	-0.14971
0.726	-94.836	23.32	1267.62	-1.2207	0.93554	-1.3078	-38.5606	-180.627	1511.4679	-1.3237	0.65283	-1.3413	73.319	-108.67	1408.207	-0.88086	1.0664	-2.0117	-60.127	22.557	15.9191	0.082324	-0.064453	-0.16904
0.728	-79.666	1.22	1248.49	-1.1297	0.95781	-1.2944	-49.8202	-152.638	1522.0481	-1.4863	0.74609	-1.4414	35.39	-60.4545	1408.876	-0.85156	1.0283	-2.0078	-49.0358	55.2826	21.1683	0.065528	-0.073047	-0.19014
0.73	-86.352	-12.63	1234.93	-1.0039	0.95703	-1.2656	-37.4071	-106.5454	1521.6213	-1.5547	0.79004	-1.4941	25.19416	-31.577	1377.987	-0.82593	0.99243	-1.991	-44.2827	14.0999	33.7199	0.046387	-0.062793	-0.20323
0.732	-88.949	-9.39000000000001	1210.75	-0.86103	0.93858	-1.238	7.4585	-106.399	1492.9788	-1.6265	0.85596	-1.5659	21.802	-50.651	1375.1176	-0.80469	0.95117	-1.9766	-66.526	22.8631	23.2661	0.019531	-0.052246	-0.22412
0.734	-93.902	-17.11	1191.96	-0.70898	0.89903	-1.2016	27.4088	-95.266	1483.8629	-1.6541	0.86939	-1.6043	29.75919	-76.2038	1403.2715	-0.77344	0.9082	-1.9492	-49.5512	-2.627	3.182	-0.0044922	-0.041504	-0.24521
0.736	-83.223	-5.88	1183.4	-0.55703	0.85098	-1.1668	-0.208000000000002	-100.717	1472.705	-1.688	0.89307	-1.644	55.813	-86.82	1382.968	-0.75586	0.88379	-1.9492	-51.9279	52.3386	12.117	-0.032422	-0.024414	-0.27002
0.738	-82.71	-2.61000000000001	1161.22	-0.41943	0.7878	-1.1362	28.8501	-101.048	1487.402	-1.7339	0.94775	-1.7124	53.263	-82.641	1346.5809	-0.70264	0.8501	-1.9253	-51.479	52.4681	13.34	-0.055078	-0.00019528	-0.2958
0.74	-87.4696	3.70999999999998	1121.11	-0.29199	0.72314	-1.1138	44.53	-95.737	1497.418	-1.7612	0.97314	-1.7495	37.473	-29.7665	1299.19	-0.67285	0.83106	-1.9238	-55.1772	70.617	1.722	-0.072265	0.020215	-0.32314
0.742	-84.7655	11.9	1097.57	-0.18525	0.65849	-1.097	81.192	-69.945	1508.14	-1.7988	1.0176	-1.8037	44.558	-0.157999999999999	1261.524	-0.6499	0.83643	-1.9136	-43.6242	32.8097	-4.178	-0.077637	0.040527	-0.34717
0.744	-41.92	26.44	1058.93	-0.086426	0.59463	-1.0831	124.858	-75.003	1513.315	-1.8266	1.0488	-1.8354	24.0936	-3.2742	1260.371	-0.63281	0.85156	-1.9063	-38.5683	26.447	-14.574	-0.083692	0.061133	-0.37285
0.746	-30.077	33.15	1026.09	0.0010738	0.53017	-1.0765	157.805	-80.86277	1527.063	-1.8491	1.0728	-1.855	50.533	14.82827	1260.2465	-0.62891	0.85547	-1.8965	-11.1391	37.363	13.7544	-0.084082	0.082226	-0.39638
0.748	-24.009	39.94	972.85	0.074706	0.46767	-1.0771	120.064	-88.3926	1546.215	-1.855	1.0981	-1.8745	71.979	31.9659	1226.695	-0.62451	0.86377	-1.8726	-16.313	52.927	57.5025	-0.086426	0.10723	-0.41787
0.75	-15.959	17.9	950.1	0.13818	0.41748	-1.0815	126.704	-72.576	1571.8861	-1.8386	1.0931	-1.8797	23.52741	45.945	1229.248	-0.62231	0.86108	-1.8445	-19.0021	72.272	62.806	-0.083692	0.12832	-0.44199
0.752	15.567	7.84999999999999	932.68	0.18438	0.38105	-1.0879	129.895	-54.357	1577.531	-1.814	1.0981	-1.8784	-5.106	56.644	1223.59	-0.62207	0.85547	-1.8223	-3.01	16.1867	47.87501	-0.086914	0.13428	-0.4668
0.754	24.149	-25.88	915.63	0.22158	0.35097	-1.0936	92.416	-38.56335	1556.394	-1.7456	1.0845	-1.8726	-12.3149	40.975	1213.9171	-0.61572	0.84033	-1.7925	15.5166	-10.4116	49.585	-0.095215	0.13437	-0.49883
0.756	1.899	-42.4	903.59	0.24229	0.33379	-1.1077	98.579	-58.0593	1543.4824	-1.7129	1.0664	-1.8594	-18.9698	34.066	1199.7113	-0.60498	0.83154	-1.7827	12.231	-55.0113	85.787	-0.1208	0.12461	-0.52578
0.758	17.496	-77.281	893.76	0.2544	0.33096	-1.1232	89.079	-68.853	1538.99	-1.6367	1.0234	-1.832	31.4926	21.38699	1169.5753	-0.57031	0.82031	-1.7559	-0.649999999999999	-17.503	136.2362	-0.17901	0.11758	-0.55352
0.76	32.18	-95.189	895.33	0.26123	0.33643	-1.1499	69.3649	-76.636	1531.229	-1.5844	0.98584	-1.8052	24.5642	18.406	1141.3057	-0.54248	0.8169	-1.727	29.977	-10.596	199.127	-0.2624	0.11152	-0.59453
0.762	32.089	-97.821	851.85	0.26006	0.35117	-1.1887	75.5705	-61.07	1515.585	-1.5498	0.94141	-1.7754	-0.7484	32.9045	1120.836	-0.5127	0.81445	-1.6973	35.282	2.324	238.7169	-0.36426	0.1001	-0.63721
0.764	10.436	-101.954	839.036	0.25469	0.37647	-1.2305	95.331	-55.9734	1483.0784	-1.5137	0.87793	-1.7344	0.5617	57.2067	1095.727	-0.48047	0.80762	-1.6504	24.4242	-21.226	343.657	-0.50508	0.093164	-0.7168
0.766	37.228	-111.898	822.927	0.25586	0.40732	-1.2794	60.22	-22.0618	1432.824	-1.5024	0.84033	-1.7085	-9.666	65.104	1079.528	-0.45654	0.79688	-1.627	53.8425	-2.593	504.117	-0.6711	0.082519	-0.79043
0.768	44.281	-114.76	824.035	0.24541	0.44268	-1.3361	31.493	6.2796	1387.39	-1.4761	0.76611	-1.6597	16.983	76.926	1080.6619	-0.41797	0.7666	-1.5703	67.253	19.246	726.941	-0.89414	0.10088	-0.88223
0.77	45.3	-105.783	839.551	0.22266	0.48486	-1.3921	45.282	37.227	1374.183	-1.4514	0.71997	-1.6326	34.0123	74.448	1055.4367	-0.3938	0.73999	-1.5222	14.71	24.6484	964.19	-1.1609	0.11406	-0.9539
0.772	48.659	-104.975	847.309	0.18799	0.53086	-1.4506	21.512	49.6126	1350.34	-1.4199	0.69141	-1.6055	8.962	85.1939	1039.82749	-0.36914	0.71289	-1.4766	23.264	23.5822	1136.2886	-1.5015	0.22217	-1.0972
0.774	66.054	-118.778	856.227	0.14776	0.57129	-1.502	0.2451	57.0535	1335.134	-1.3608	0.68311	-1.5776	-2.7975	123.075	1013.70555	-0.34424	0.68408	-1.4116	0.9032	-2.653	1295.8136	-1.8349	0.30127	-1.1821
0.776	61.121	-105.432	862.98	0.095021	0.61699	-1.5468	25.6046	54.5028	1315.5478	-1.3252	0.69043	-1.5605	0.808	158.698	978.7806	-0.33057	0.66553	-1.3823	17.0706	18.722	1411.82494	-2.1637	0.44248	-1.2824
0.778	52.674	-93.24	850.794	0.033496	0.66221	-1.5862	-23.3511	44.144	1297.44391	-1.2578	0.71191	-1.5352	-31.7391	160.737	966.616	-0.31299	0.63037	-1.3179	10.2355	-33.648	1487.1613	-2.4578	0.63428	-1.4062
0.78	47.409	-91.528	858.174	-0.037109	0.70117	-1.6094	-31.0113	37.508	1284.0153	-1.2163	0.72901	-1.5092	-14.499	149.78	929.1716	-0.2998	0.61767	-1.2773	-12.7457	-44.891	1522.407	-2.6227	0.85625	-1.4424
0.782	23.063	-94.828	873.887	-0.10732	0.74151	-1.6257	-22.4348	24.1684	1267.4342	-1.1772	0.73682	-1.4878	-3.902	114.232	893.218	-0.28711	0.59863	-1.2354	-21.4512	-100.1333	1535.323	-2.7109	1.1689	-1.502
0.784	32.952	-94.309	878.882	-0.18291	0.77735	-1.6262	-8.5823	25.2099	1217.972	-1.144	0.73779	-1.4409	-39.6987	111.6695	869.272	-0.27832	0.58301	-1.1694	-23.5525	-117.089	1504.12	-2.6501	1.4187	-1.5708
0.786	16.999	-119.36266	895.268	-0.25596	0.79766	-1.6152	-33.232	31.1466	1184.055	-1.1289	0.73145	-1.4082	-17.561	113.4213	847.04	-0.27344	0.57666	-1.1382	-54.124	-186.262	1483.217	-2.4617	1.5899	-1.6799
0.788	1.15299999999999	-127.9935	917.98	-0.33096	0.80732	-1.5966	-16.8106	40.995	1178.878	-1.1084	0.72363	-1.3564	-22.69	101.7851	846.494	-0.26465	0.55664	-1.0762	-119.666	-157.221	1471.2907	-2.0121	1.5457	-1.6818
0.79	24.305	-124.489	951.005	-0.3999	0.79736	-1.5776	2.2378	49.562	1157.8495	-1.0871	0.71753	-1.3191	-32.2517	95.144	811.777	-0.25879	0.52783	-1.0073	-108.825	-174.844	1460.599	-1.3904	1.2795	-1.5311
0.792	39.204	-110.777	947.849	-0.45058	0.77881	-1.5587	1.65107	65.338	1162.187	-1.0566	0.70508	-1.2793	-17.12	96.4119	772.81	-0.25781	0.51367	-0.97852	-102.536	-162.293	1420.599	-0.88477	1.0293	-1.4648
0.794	38.88	-119.378	939.053	-0.48701	0.75049	-1.5354	48.736	77.043	1144.577	-1.0034	0.69775	-1.2261	-35.507	115.5233	729.7633	-0.25391	0.50391	-0.91309	-78.329	-162.926	1378.003	-0.50196	0.8418	-1.4567
0.796	40.086	-112.36	947.289	-0.5128	0.72666	-1.5202	45.186	81.024	1094.948	-0.96631	0.68896	-1.2007	-44.206	138.939	713.095	-0.24585	0.48364	-0.86596	-82.2024	-161.972	1392.5545	-0.24258	0.72851	-1.4602
0.798	63.064	-105.954	949.77	-0.52402	0.70566	-1.51	36.457	94.9415	1051.254	-0.90234	0.67383	-1.1572	-37.331	148.4686	708.9679	-0.23877	0.47363	-0.82227	-86.091	-101.994	1463.4967	-0.13203	0.68047	-1.4855
0.8	60.679	-94.166	934.88	-0.52539	0.69043	-1.4883	28.3889	133.696	1034.1274	-0.85132	0.65308	-1.1224	-45.152	156.1608	689.848	-0.22754	0.45801	-0.75977	-133.4261	-41.34	1507.2519	-0.083301	0.64746	-1.4986
0.802	24.223	-86.472	920.936	-0.51553	0.67803	-1.4685	24.5711	140.095	993.8835	-0.80225	0.63721	-1.0776	-49.393318	151.1471	654.6458	-0.21924	0.44287	-0.72803	-154.173	-21.23	1479.003	-0.074219	0.62305	-1.4844
0.804	19.446	-89.968	913.201	-0.50117	0.65586	-1.443	17.9	141.49	987.5678	-0.74609	0.60596	-1.019	-27.747	143.2075	604.5134	-0.19727	0.41357	-0.65967	-123.263	-92.05	1412.725	-0.10918	0.57529	-1.4846
0.806	5.004	-82.875	913.461	-0.48359	0.63359	-1.4222	7.515	134.5	951.0095	-0.72021	0.59912	-0.99756	-52.67213	136.7037	594.5423	-0.1831	0.39965	-0.6228	-93.801	-135.855	1376.377	-0.17139	0.52197	-1.487
0.808	19.503	-71.542	906.761	-0.47343	0.61084	-1.4009	6.126	108.6264	895.5798	-0.66455	0.56689	-0.93506	-38.046	147.668	558.146	-0.16602	0.37891	-0.58398	-83.666	-228.646	1431.888	-0.23741	0.49854	-1.4885
0.81	-8.489	-63.969	883.152	-0.47021	0.58643	-1.3804	-19.487	103.358	855.3241	-0.62647	0.54663	-0.88526	-40.156	161.839	529.8832	-0.146	0.35889	-0.53076	-92.945	-225.004	1480.25	-0.31845	0.51631	-1.5175
0.812	16.739	-62.971	872.788	-0.46914	0.55694	-1.3614	-16.876	110.72	836.4769	-0.58398	0.52734	-0.83789	-58.388	160.968	499.738	-0.12891	0.34961	-0.50244	-60.162	-301.458	1523.266	-0.4248	0.57227	-1.5605
0.814	25.651	-68.818	869.281	-0.46748	0.53408	-1.3374	-4.797	113.289	815.1904	-0.53662	0.5083	-0.77686	-28.796	137.4215	471.098	-0.10449	0.32764	-0.45313	-43.082	-327.961	1496.749	-0.55137	0.66328	-1.6215
0.816	30.297	-60.998	857.39	-0.46475	0.51338	-1.319	-6.289	102.568	778.7447	-0.50586	0.48828	-0.74414	-31.9064	117.616	444.17	-0.07959	0.31006	-0.41333	-2.534	-344.267	1488.4948	-0.67578	0.75254	-1.6844
0.818	33.511	-56.647	834.148	-0.44649	0.50293	-1.2994	0.943000000000001	103.1868	746.76104	-0.45264	0.46094	-0.67725	-44.495	119.491	434.7	-0.058105	0.29346	-0.37451	22.905	-309.789	1527.404	-0.79063	0.81113	-1.739
0.82	54.215	-57.355	832.913	-0.42822	0.49854	-1.2769	-24.837522	110.1596	729.795	-0.41333	0.43579	-0.63086	-17.057	142.7484	400.402	-0.029297	0.26123	-0.31885	-0.111000000000001	-265.328	1594.272	-0.9042	0.86611	-1.7972
0.822	50.07	-50.402	824.912	-0.40254	0.49902	-1.2572	-34.5698	121.413	709.1261	-0.37988	0.41455	-0.5835	-31.168	156.8008	406.9566	-0.016113	0.24023	-0.28955	13.693	-230.782	1665.129	-1.0542	1.0298	-1.9604
0.824	28.649	-47.136	820.345	-0.37715	0.50156	-1.2379	-58.4402	147.7178	670.971	-0.34131	0.38916	-0.52588	-43.599	150.818	406.515	0.00097656	0.23633	-0.2666	-22.345	-196.4309	1678.323	-1.1687	1.1509	-2.071
0.826	32.815	-48.498	819.886	-0.35059	0.51407	-1.2175	-59.189	154.6597	656.4827	-0.31787	0.35596	-0.48779	-26.711	125.994	366.449	0.016601	0.21802	-0.2334	-23.1038	-167.9032	1634.857	-1.2312	1.2305	-2.1504
0.828	19.437	-50.107	814.488	-0.33819	0.52022	-1.1942	-42.978	126.3531	602.1418	-0.28662	0.3291	-0.43408	-47.689	120.9197	367.886	0.03418	0.20068	-0.19434	20.462	-101.502	1545.045	-1.2484	1.2328	-2.191
0.83	17.005	-42.719	807.944	-0.32324	0.52734	-1.1699	-73.344	118.8706	573.9351	-0.26806	0.31298	-0.40552	-38.54	120.9474	343.4713	0.047852	0.19092	-0.16162	32.9475	-60.24	1504.023	-1.2274	1.1961	-2.1977
0.832	-6.406	-31.015	758.498	-0.31172	0.53379	-1.1414	-67.175	114.4779	538.285	-0.24902	0.29443	-0.36719	-14.886	117.234	318.2681	0.050293	0.18506	-0.15527	13.313	-13.472	1505.956	-1.2168	1.1777	-2.2148
0.834	-6.98799999999999	-23.279	745.459	-0.30468	0.53477	-1.1109	-63.973	104.4212	521.63438	-0.21338	0.26758	-0.31885	-40.473	117.156	286.373	0.064453	0.16797	-0.12793	59.5614	-49.609	1560.85794	-1.2476	1.2194	-2.2661
0.836	-4.189	-10.502	729.634	-0.29727	0.5375	-1.0843	-63.467	113.7764	486.20753	-0.18701	0.24756	-0.29297	-43.3924	112.251	240.506	0.07544	0.16968	-0.10693	53.464	-61.31	1564.942	-1.2986	1.2808	-2.2976
0.838	11.851	3.478	708.537	-0.29385	0.53213	-1.046	-51.2295	115.1481	451.044	-0.15137	0.23633	-0.26074	-26.308	101.96	203.564	0.087402	0.16211	-0.085938	32.941	-76.203	1573.258	-1.3486	1.3762	-2.3367
0.84	10.95	2.871	697.409	-0.29346	0.52344	-1.0117	-17.8758	107.306	408.146	-0.10864	0.21679	-0.22534	-31.242	102.7155	219.6781	0.10645	0.15576	-0.05957	61.903	-33.9158	1569.333	-1.3896	1.4568	-2.3795
0.842	-0.036999999999999	-3.748	693.098	-0.28369	0.52002	-0.97686	-18.352	116.8174	407.599	-0.074707	0.21143	-0.20117	-41.319	109.1958	208.321	0.11035	0.15625	-0.055664	34.941	15.9438	1561.674	-1.4102	1.5234	-2.4023
0.844	36.612	5.861	682.374	-0.27754	0.50781	-0.93515	-31.5856	141.686	393.76	-0.03125	0.18359	-0.16016	-37.776	115.644	212.2715	0.12939	0.1709	-0.049316	12.8238	54.371	1556.1416	-1.3712	1.519	-2.3954
0.846	18.569	9.295	664.332	-0.26777	0.49765	-0.9043	5.7673	146.136	383.9247	-0.018066	0.17725	-0.15039	-44.3762	122.62	208.7291	0.14405	0.16992	-0.038574	7.8738	48.573	1531.668	-1.3105	1.4152	-2.3496
0.848	-4.428	11.777	641.306	-0.25762	0.49082	-0.87207	-4.0922	141.596	379.956	0	0.16748	-0.13086	-29.31	116.7706	174.719	0.15918	0.16895	-0.021973	-35.26155	-28.1416	1525.6196	-1.2734	1.4719	-2.0461
0.85	2.48099999999999	1.177	623.644	-0.24658	0.48145	-0.83984	-5.228	135.311	344.4204	0.018311	0.15185	-0.10693	-49.1524	118.8406	163.038	0.18555	0.16357	-0.0063477	-47.2255	-53.23154	1509.117	-1.2687	1.1013	-2.1581
0.852	3.489	8.771	601.672	-0.23584	0.46963	-0.80059	25.7604	113.485	328.869	0.034668	0.13525	-0.073242	-39.931	113.1538	151.844	0.19922	0.16846	-0.0039063	-30.8417	-82.881	1532.808	-1.0601	0.98291	-2.0542
0.854	-1.846	3.653	579.0245	-0.22187	0.45596	-0.76651	22.159	104.932	318.006	0.04541	0.12744	-0.055664	-25.003	94.7235	124.828	0.22461	0.15771	0.0039063	-29.438	6.082	1520.787	-0.97655	0.87637	-2.0646
0.856	-23.22	5.43	570.249	-0.2082	0.44385	-0.73564	-4.717	104.239	299.8184	0.047852	0.12695	-0.053711	-35.113	99.5182	105.153	0.24341	0.15723	0.011231	-7.633	45.32	1451.194	-0.86816	0.92696	-2.0293
0.858	16.248	2.636	566.136	-0.19658	0.43096	-0.70342	23.6235	87.9196	279.175	0.062988	0.12256	-0.03125	-51.91939	84.8519	93.803	0.25928	0.14648	0.022461	-15.256	103.108	1364.37	-0.7955	0.99493	-1.9512
0.86	5.775	6.255	563.71	-0.18066	0.40869	-0.66943	30.50797	79.4664	253.0504	0.074463	0.12061	-0.02124	-28.838	68.88	90.1648	0.28369	0.13818	0.030762	-29.5874	116.451	1312.506	-0.80098	0.96172	-1.9233
0.862	7.835	14.988	533.343	-0.16699	0.396	-0.63291	-7.3992	80.5896	222.6969	0.087402	0.12012	-0.0058594	-38.597	75.6629	106.245876	0.29248	0.14063	0.033203	-70.6464	134.594	1325.1554	-0.82764	0.8833	-1.8823
0.864	9.138	14.308	510.432	-0.14903	0.38936	-0.61436	9.2335	79.5819	213.655	0.10254	0.12988	-0.010742	-31.777	79.88791	101.6474	0.31299	0.13574	0.043457	-39.655	170.989	1331.257	-0.84297	0.81211	-1.8012
0.866	31.186	18.696	498.205	-0.12949	0.37725	-0.59053	24.3752	83.9908	212.9355	0.1084	0.13379	-0.0039063	-31.834	70.7988	77.869	0.32641	0.13525	0.044922	-53.0819	197.69	1270.5343	-0.86211	0.75742	-1.7195
0.868	29.821	21.2467	470.214	-0.11152	0.35332	-0.55508	-19.346	102.8167	216.888	0.12158	0.14111	-0.0019531	-28.89	78.785	76.196	0.34424	0.1333	0.056641	-79.299	211.352	1173.681	-0.87851	0.71367	-1.6563
0.87	9.86499999999999	40.3285	451.477	-0.091797	0.3374	-0.52832	-7.9565	105.156	192.8518	0.13843	0.1355	-0.0012207	-33.18457	77.451	76.406	0.36963	0.13623	0.060547	-52.4819	169.881	1103.925	-0.89034	0.66514	-1.6169
0.872	15.259	52.453	443.051	-0.074805	0.32422	-0.50527	4.0785	96.879	189.76	0.15332	0.13867	0.003418	-14.769	75.93	61.63619	0.38232	0.1416	0.057617	-51.387	205.593	1070.219	-0.88037	0.65479	-1.562
0.874	21.019	45.579	437.503	-0.064062	0.31641	-0.4875	-40.104	90.7867	175.1615	0.17041	0.1333	0.0053711	-25.387	77.108	55.7916	0.41113	0.13818	0.058105	-46.565	191.998	1068.71	-0.84424	0.6751	-1.4927
0.876	4.70500000000001	50.715	426.759	-0.054297	0.30898	-0.4707	-49.6035	89.9964	184.1278	0.18213	0.13623	-0.0053711	-26.025	59.9779	46.3897	0.42725	0.13159	0.05957	-40.172	235.51	1045.393	-0.80508	0.69609	-1.4258
0.878	-2.837	42.8964	416.344	-0.041699	0.30137	-0.4502	-17.5352	90.6287	148.9833	0.19531	0.13623	-0.0063477	-25.441	55.056	53.5208	0.43945	0.11523	0.063965	-14.579	203.375	1005.436	-0.76602	0.69766	-1.3679
0.88	12.507	42.738	411.348	-0.030762	0.2876	-0.42822	-46.7119	95.1164	134.2509	0.19873	0.1355	-0.014404	-22.543	59.2607	58.2778	0.44678	0.10156	0.051758	-62.333	174.215	959.372	-0.73691	0.69727	-1.3199
0.882	9.41	41.09	411.791	-0.025293	0.279	-0.40694	-68.684	97.8607	111.89	0.20166	0.14111	-0.022949	-1.028	49.5741	52.1699	0.44727	0.094238	0.049805	-52.30516	154.188	934.2616	-0.71338	0.69336	-1.2656
0.884	8.939	42.348	383.739	-0.02295	0.27724	-0.39287	-35.12022	82.7796	96.999	0.20166	0.146	-0.03418	-31.934	42.2583	35.1783	0.43799	0.070313	0.053223	-66.731	163.103	915.008	-0.68838	0.66865	-1.1927
0.886	3.095	33.345	357.003	-0.020215	0.27178	-0.38272	-62.631	59.27	92.9361	0.19751	0.14892	-0.041015	-28.87	40.1173	36.9666	0.42407	0.061035	0.048096	-71.071	183.399	885.829	-0.65176	0.642	-1.1223
0.888	10.903	32.5798	346.345	-0.018555	0.26475	-0.36631	-58.674	65.281	88.029692	0.19141	0.15332	-0.04834	-42.7076	29.7665	19.05004	0.40527	0.056152	0.040527	-76.226	180.535	816.855	-0.60996	0.61152	-1.0516
0.89	17.754	31.425	354.727	-0.012695	0.26367	-0.34863	-29.2332	58.284	84.383	0.17773	0.15625	-0.057129	-34.57	35.4367	9.0991	0.38379	0.053223	0.027832	-69.921	173.74	730.3982	-0.56738	0.5916	-0.98886
0.892	-3.529	35.868	350.066	-0.014746	0.26142	-0.33526	-14.395	62.7611	71.6324	0.16797	0.16064	-0.062012	-28.69	35.3948	25.2967	0.36719	0.055176	0.016602	-73.668	182.584	684.3662	-0.52734	0.56543	-0.92969
0.894	-5.36	24.414	349.238	-0.01582	0.25801	-0.32441	-41.2182	73.00734	77.85	0.15527	0.1665	-0.072754	-35.506	22.87239	29.3567	0.33496	0.05957	0.00048828	-49.2488	235.1185	664.502	-0.48076	0.5044	-0.84092
0.896	2.226	21.844	355.668	-0.014258	0.25527	-0.31348	-12.703	84.1461	69.8561	0.15454	0.16723	-0.076904	-22.445	25.19981	53.208	0.31787	0.07666	-0.011719	-38.905	248.5614	630.9135	-0.43662	0.46474	-0.76748
0.898	12.975	30.6562	339.443	-0.011426	0.25088	-0.3044	-15.2244	67.2052	72.515	0.15234	0.17041	-0.078125	-26.087	19.1318	34.6259	0.30713	0.089844	-0.026367	-69.921	274.75	588.26	-0.39561	0.4581	-0.72803
0.9	-20.14	38.9125	328.529	-0.016113	0.24658	-0.29639	-35.727	61.037	55.8144	0.15186	0.16602	-0.082031	-27.6402	25.1503	27.0093	0.29443	0.10645	-0.040527	-77.68046	241.9392	517.165	-0.35645	0.39824	-0.63564
0.902	-13.71	37.649	304.023	-0.013281	0.24082	-0.27773	12.695	54.76004	59.619	0.15479	0.16992	-0.080078	-28.09	35.6754	21.1697	0.29102	0.11719	-0.04834	-60.931	225.6339	474.665	-0.31396	0.34619	-0.52832
0.904	3.134	47.341	291.331	-0.012402	0.23389	-0.2626	24.3974	45.6709	40.565	0.15723	0.16455	-0.092285	-25.196	27.7858	14.38319	0.29395	0.14453	-0.058105	-47.4986	227.6566	469.554	-0.28252	0.34073	-0.49795
0.906	-4.02999999999999	60.991	282.911	-0.020215	0.23076	-0.25283	6.2996	24.0337	50.3721	0.16138	0.16284	-0.094239	-22.267	16.9107	0.837	0.29053	0.15699	-0.062988	-65.7931	229.83	460.9341	-0.26104	0.3127	-0.42852
0.908	-9.323	53.157	287.363	-0.023047	0.22607	-0.24775	10.5069	23.65107	23.0366	0.16309	0.15234	-0.1001	-28.915	32.70512	-3.365	0.29248	0.17188	-0.063965	-50.633	241.589	428.0275	-0.2333	0.28809	-0.37031
0.91	-10.339	47.964	285.367	-0.025879	0.22998	-0.23926	16.266	12.9541	12.8608	0.1665	0.14502	-0.10156	-23.486	35.9758	-5.021	0.28613	0.19092	-0.064941	-73.9929	216.046	337.707	-0.21211	0.24219	-0.28359
0.912	6.404	34.6506	289.682	-0.030469	0.22158	-0.23272	14.036	22.5555	4.029	0.16211	0.14014	-0.10596	-40.5502	24.0734	30.81221	0.28613	0.18945	-0.064941	-77.541	196.748	285.447	-0.18262	0.20117	-0.20801
0.914	-6.311	39.5836	274.52	-0.036035	0.22217	-0.22842	20.92363	33.7364	21.866	0.15967	0.13379	-0.10938	-33.5533	33.3778	44.442	0.29346	0.19287	-0.052734	-63.122	169.62	281.112	-0.15459	0.19121	-0.16631
0.916	-2.57	46.8793	267.104	-0.041894	0.21475	-0.22334	41.867	33.8622	35.1866	0.15235	0.1355	-0.10938	-36.882	27.4008	29.2155	0.29688	0.19385	-0.053955	-23.342	167.7057	298.654	-0.12656	0.14317	-0.10801
0.918	7.913	49.84	263.937	-0.042773	0.2127	-0.22178	9.4189	20.2278	39.02843	0.146	0.12891	-0.10254	-21.872	34.50012	29.74056	0.30566	0.19189	-0.046875	-23.435	144.8766	291.45162	-0.096094	0.1127	-0.047851
0.92	5.604	55.259	261.391	-0.04541	0.20996	-0.21436	9.435	12.56458	15.365	0.13721	0.13232	-0.11035	-21.452	32.05734	21.332	0.31201	0.19092	-0.038086	-13.7542	128.44178	264.7054	-0.063281	0.064453	0.002734
0.922	-4.31	65.381	253.751	-0.051953	0.21006	-0.21319	16.156	4.5724	19.277	0.13086	0.13184	-0.11328	-21.994	19.91195	10.073	0.31787	0.19092	-0.032715	-9.2963	108.0861	199.611	-0.036133	0.03418	0.044922
0.924	-8.59200000000001	52.405	251.6977	-0.051074	0.20908	-0.21055	-36.1719	9.8147	24.2935	0.12402	0.14111	-0.11621	-18.917	32.7809	7.91	0.32764	0.18604	-0.025879	-39.99	111.665	172.9973	-0.029101	0.0011722	0.071777
0.926	-3.212	42.829	273.471	-0.054981	0.20556	-0.20937	-19.29795	23.4164	15.5581	0.12671	0.14233	-0.12012	-8.417	27.50926	4.903	0.34473	0.1875	-0.022461	-23.878	141.303	188.308	-0.015625	-0.022364	0.10694
0.928	-7.044	37.89	286.431	-0.058008	0.20596	-0.21162	-20.5222	14.1339	-15.7912	0.12891	0.14746	-0.11377	-10.715	11.5416	19.2647	0.35352	0.18896	-0.021973	-17.897	137.21	189.25	-0.017188	-0.0333	0.12334
0.93	-5.344	49.089	285.614	-0.062012	0.20215	-0.20947	-24.1866	7.1755	-11.8221	0.14111	0.15576	-0.10986	-37.978	18.4892	33.5667	0.37646	0.18457	-0.025391	3.209	128.123	161.486	-0.01709	-0.043847	0.14668
0.932	-8.226	44.1264	264.464	-0.064551	0.20264	-0.20928	-39.4255	6.8608	2.752	0.14063	0.16064	-0.11523	-25.083	20.9803	55.7979	0.38404	0.18311	-0.030762	-29.25333	87.302	92.059	-0.020508	-0.064941	0.18164
0.934	4.34500000000001	33.154	270.726	-0.07002	0.20557	-0.20888	-21.06755	16.2127	6.368	0.15527	0.16895	-0.11328	-9.828	24.268	33.2464	0.39258	0.18408	-0.04248	-24.04	70.287	61.456	-0.026074	-0.045899	0.18848
0.936	-4.87	45.7074	270.292	-0.080566	0.2083	-0.21006	-49.041	19.22309	12.8606	0.167	0.16871	-0.10937	-17.251	40.2496	41.3988	0.39063	0.18115	-0.05957	-17.3478	67.028	63.7098	-0.033984	-0.0375	0.19541
0.938	-14.757	55.838	271.972	-0.083106	0.20605	-0.21025	-47.2858	20.74818	2.901	0.17725	0.17041	-0.10254	-28.227	31.21	31.2587	0.3877	0.18604	-0.071289	0.361999999999998	86.7439	69.35	-0.035938	-0.033203	0.21533
0.94	1.843	49.297	259.711	-0.093262	0.2085	-0.2168	-35.94523	6.3078	16.284	0.18457	0.17041	-0.09668	-22.254	18.2551	7.886	0.37695	0.18457	-0.10449	-6.58900000000001	70.2023	47.756	-0.041797	-0.025098	0.2249
0.942	-6.612	44.692	279.609	-0.10342	0.20674	-0.21026	-40.5914	5.1144	13.0042	0.18896	0.16553	-0.091797	-13.49	37.9513	11.207	0.37109	0.19092	-0.12207	-24.0732	42.53398	17.2884	-0.04541	-0.013184	0.24512
0.944	-6.629	53.796	295.701	-0.11347	0.20703	-0.21914	-57.446	14.795998	13.579	0.19824	0.16455	-0.07959	-19.154	40.273	-12.411	0.36035	0.2002	-0.14063	-20.2727	17.209	2.838	-0.046094	0.015625	0.24238
0.946	-27.605	51.85	311.612	-0.12129	0.20976	-0.22148	-37.5526	31.5484	-4.4402	0.20508	0.15674	-0.075439	-26.845	31.27	13.9073	0.34766	0.22021	-0.17285	-29.50874	36.511	43.99424	-0.036718	0.038281	0.23867
0.948	-16.614	48.689	310.039	-0.13154	0.21612	-0.22783	-17.8999	21.0424	5.9322	0.21338	0.15527	-0.066895	-33.216	35.4541	30.9685	0.34277	0.23584	-0.18408	-13.469	61.595	76.077	-0.025782	0.057422	0.24297
0.95	-10.268	50.341	312.8	-0.13721	0.21973	-0.23389	-31.231	27.416	6.1126	0.22314	0.15283	-0.0625	-23.021	16.6358	26.14	0.33936	0.25928	-0.21045	-41.8475	48.2423	57.366	-0.01543	0.074804	0.25283
0.952	-13.276	61.859	308.959	-0.14531	0.22392	-0.24111	-24.1169	35.824	13.8733	0.22998	0.15088	-0.053223	-47.21167	39.4911	32.24812	0.344	0.28272	-0.23169	-17.883	22.411	41.915	0.0014648	0.080566	0.26221
0.954	-15.439	49.421	309.97	-0.14522	0.23164	-0.24942	4.073	28.0869	4.647	0.24121	0.15186	-0.049316	-21.9052	38.7991	20.0385	0.34375	0.30664	-0.25439	-56.3421	-6.6525	-14.673	0.014844	0.086621	0.27334
0.956	-27.9	49.43	308.964	-0.14638	0.23555	-0.25801	9.584	12.8048	8.8327	0.24927	0.1521	-0.042969	-25.371	17.7528	18.29926	0.34473	0.3291	-0.28223	-36.1227	1.59	-11.212	0.036035	0.097656	0.29082
0.958	-3.244	64.986	309.7	-0.14756	0.24082	-0.26904	-5.383	11.9183	8.2838	0.25586	0.15479	-0.039551	-26.953	36.931	18.5353	0.33984	0.33252	-0.29639	-29.315	17.55762	19.885	0.052832	0.10664	0.30918
0.96	-13.15	63.318	327.832	-0.14697	0.25049	-0.27686	17.7516	15.0789	9.4099	0.26563	0.15869	-0.025391	-19.981	25.706	26.6538	0.31348	0.34668	-0.33789	-40.8929	42.0983	31.73	0.076075	0.11631	0.32715
0.962	-10.823	58.978	338.193	-0.14531	0.25439	-0.29102	5.638	21.3627	4.2004	0.27344	0.15771	-0.019531	-33.291	-1.5906	42.68	0.2749	0.37744	-0.38843	-52.2186	34.1899	13.238	0.11768	0.12939	0.34717
0.964	-14.889	48.02	357.926	-0.14394	0.25723	-0.30323	7.204	37.402	1.7993	0.28027	0.16162	-0.02002	-31.522	10.2018	83.6241	0.22461	0.41113	-0.44873	-41.399	36.3621	0.758000000000003	0.16416	0.12861	0.36367
0.966	-7.675	51.196	362.747	-0.14317	0.2666	-0.30791	14.0228	29.8893	4.0638	0.28589	0.16211	-0.02002	-27.528	7.16917	128.0024	0.12793	0.40869	-0.49951	-28.9277	41.7234	-24.199	0.22276	0.12637	0.37217
0.968	5.758	56.132	363.392	-0.14756	0.2707	-0.32861	29.4726	22.2425	4.4401	0.29053	0.16504	-0.02002	-49.024	22.9917	156.4475	0.067871	0.39648	-0.51855	-36.3791	56.5239	17.76	0.2876	0.10566	0.38115
0.97	-25.669	62.133	366.327	-0.14844	0.27637	-0.3457	-2.613	38.744	17.5124	0.29736	0.16455	-0.027344	-58.716	61.412	201.5719	-0.061035	0.4126	-0.60352	14.488	70.299	53.3082	0.34678	0.089453	0.38799
0.972	-9.377	69.992	367.103	-0.14932	0.28105	-0.36543	15.803	42.416	13.8161	0.29785	0.16455	-0.029785	-59.361	65.8688	285.795	-0.19434	0.41675	-0.67871	-40.109	47.6089	38.9183	0.40088	0.068848	0.39111
0.974	-2.97	74.09	364.637	-0.14805	0.28632	-0.38047	6.6052	19.7484	22.05915	0.2959	0.16748	-0.036133	-73.413	77.8218	396.933	-0.3418	0.43115	-0.75684	-23.07738	50.436	32.9881	0.43164	0.03916	0.39844
0.976	-8.517	80.722	374.307	-0.14922	0.2918	-0.3957	-0.158000000000001	16.3375	31.3289	0.28809	0.16846	-0.040772	-91.636	91.5822	550.445	-0.58984	0.50977	-0.90039	-29.29	13.314	-14.1583	0.45596	0.018262	0.40351
0.978	-11.41	60.982	385.666	-0.15137	0.30303	-0.41357	-17.1236	5.40226	24.541	0.27588	0.1748	-0.04541	-68.555	73.8152	692.0452	-0.7373	0.54297	-0.96484	-22.8252	18.2107	6.1159	0.45713	-0.0075196	0.40977
0.98	1.008	53.759	419.661	-0.1499	0.31201	-0.43018	-3.029	11.1425	2.88632	0.25537	0.18994	-0.057617	-58.454	63.383	811.9926	-1.0508	0.64648	-1.0605	-9.447	9.4805	37.4048	0.45566	-0.034473	0.40576
0.982	-1.892	49.843	431.782	-0.15781	0.32178	-0.44102	-31.4604	21.2538	8.8828	0.24219	0.19434	-0.060547	-70.206	69.733	943.76	-1.2915	0.77515	-1.1411	-12.196	24.8515	40.348	0.45068	-0.055664	0.4043
0.984	-19.422	57.713	425.792	-0.1666	0.33164	-0.45235	-44.4407	34.63752	4.25	0.22852	0.20898	-0.071289	-95.0681	43.74	1053.1257	-1.4976	0.93799	-1.2339	-30.1467	19.2709	16.2726	0.4415	-0.074902	0.40068
0.986	-7.283	60.144	429.75	-0.17324	0.33789	-0.4668	-16.957	25.4698	14.25	0.22046	0.2251	-0.084473	-102.39	36.6286	1152.3256	-1.6636	1.1938	-1.3491	-6.4552	10.8901	20.74645	0.43457	-0.089844	0.39746
0.988	-10.221	57.291	448.773	-0.18262	0.34541	-0.47656	-23.756	15.2374	10.785	0.2168	0.24219	-0.09375	-94.554	17.8899	1224.2066	-1.687	1.3208	-1.3979	6.8654	-3.45424	23.8993	0.42793	-0.095312	0.37871
0.99	5.621	76.129	450.052	-0.18994	0.3501	-0.48486	-58.745	18.7511	23.0246	0.22168	0.25293	-0.11816	-109.8376	-48.283396	1240.274	-1.6328	1.5293	-1.5078	-3.962	-16.6818	51.196	0.41778	-0.09707	0.35429
0.992	-23.569	75.318	460.093	-0.20313	0.3582	-0.4918	-23.361	21.3426	27.6484	0.22266	0.26465	-0.13184	-92.1176	-75.514	1245.83	-1.4753	1.6199	-1.5696	18.924	7.8097	55.86	0.41162	-0.097656	0.32764
0.994	-19.695	67.41	464.278	-0.21123	0.36231	-0.50674	-20.3168	18.2542	22.82466	0.2124	0.28174	-0.15479	-83.434	-105.051	1264.409	-1.2461	1.6543	-1.5762	-10.297	17.2977	39.0666	0.3961	-0.095898	0.30869
0.996	-17.381	69.981	489.444	-0.21982	0.36699	-0.51611	-66.117	20.58598	21.7798	0.17383	0.28906	-0.17773	-77.818	-115.778	1279.854	-0.91455	1.5513	-1.4663	-13.5926	19.8618	19.9914	0.38125	-0.089355	0.28389
0.998	-6.101	78.661	509.009	-0.22402	0.37265	-0.52851	-39.8315	2.1744	41.31793	0.12305	0.28955	-0.20361	-53.253	-104.996	1290.451	-0.77686	1.4517	-1.3862	-25.8254	4.8731	-1.672	0.36172	-0.084668	0.26436
1	-15.808	68.65	522.783	-0.22656	0.37793	-0.54395	-30.70626	-10.3522	69.7749	0.021973	0.27588	-0.25781	-31.0388	-139.175	1307.193	-0.64258	1.2813	-1.2773	-6.525	7.096	10.6715	0.33272	-0.069629	0.23994
1.002	-19.046	66.582	516.913	-0.22959	0.38848	-0.54981	-39.8903	0.456399999999999	102.6502	-0.049805	0.27246	-0.26855	-23.9063	-168.884	1286.6404	-0.63477	1.2094	-1.2592	-31.289	11.423	4.8156	0.30371	-0.052246	0.2207
1.004	3.541	78.163	524.456	-0.23252	0.39903	-0.56133	-33.59811	13.5171	142.233	-0.22412	0.25439	-0.31104	-12.138	-186.628	1295.83	-0.65869	1.1489	-1.2612	-23.849	37.329	10.693	0.28096	-0.025488	0.19326
1.006	-25.655	90.992	525.422	-0.23642	0.40567	-0.56719	-18.56	20.6372	224.599	-0.38843	0.23853	-0.3457	-2.385	-200.334	1328.8371	-0.71631	1.0767	-1.2397	-61.992	41.3413	-13.94	0.25733	0.0059571	0.16963
1.008	-15.255	86.382	531.612	-0.23457	0.41621	-0.57637	-87.284	34.4537	323.346	-0.59961	0.25488	-0.40723	-24.896	-177.849	1321.608	-0.76709	1.0649	-1.2339	-56.822	40.1352	-2.2622	0.24053	0.03291	0.1458
1.01	-15.351	84.48	550.194	-0.23779	0.42236	-0.5835	-39.682	53.521	443.894	-0.92285	0.29785	-0.49121	-43.5317	-169.992	1376.3137	-0.91016	1.0762	-1.25	-23.449	34.0148	-14.4082	0.22432	0.066308	0.11582
1.012	-4.185	89.645	561.937	-0.23536	0.42842	-0.59306	6.623	57.5139	595.997	-1.1113	0.3291	-0.5332	-40.339	-176.854	1388.765	-1.0095	1.1027	-1.281	-19.654	13.76	36.9652	0.20801	0.097168	0.09082
1.014	-0.914000000000001	81.363	579.367	-0.2336	0.43711	-0.60625	-4.944	63.67214	749.6403	-1.4741	0.43994	-0.62451	-53.5662	-189.721	1368.025	-1.082	1.1133	-1.3008	-11.415	21.858	41.4697	0.18906	0.12529	0.065918
1.016	-14.86	67.361	586.024	-0.22461	0.44063	-0.62305	-8.692	62.877	876.8481	-1.7439	0.54346	-0.71314	-14.866	-237.222	1410.575	-1.1567	1.1138	-1.353	-48.249	21.2449	19.04	0.17295	0.15478	0.040137
1.018	2.164	75.432	598.166	-0.21768	0.44785	-0.62832	15.5561	78.688	975.5473	-1.9565	0.66162	-0.81006	-8.269	-274.2084	1472.358	-1.1772	1.1187	-1.3804	-33.275	42.541	1.026	0.15615	0.19111	0.031934
1.02	11.452	85.694	603.5	-0.20898	0.46143	-0.63818	-44.45604	95.278	1066.0959	-2.062	0.81689	-0.89209	-15.336	-281.589	1483.26633	-1.2188	1.1367	-1.4492	-63.813	40.7102	-27.132	0.12764	0.2209	0.013476
1.022	2.965	99.467	600.217	-0.20742	0.47217	-0.65235	-43.8099	102.483	1135.676	-2.0185	0.98829	-0.91553	16.336	-303.74	1491.6841	-1.2349	1.1558	-1.4898	-18.594	47.75154	23.632	0.088379	0.25098	-0.0024414
1.024	-6.602	97.958	608.325	-0.2001	0.48096	-0.66045	-21.595	60.237	1182.8374	-1.9521	1.2158	-0.96973	46.9979	-317.556	1486.7105	-1.252	1.1777	-1.5332	-31.099	31.121	31.357	0.080664	0.27969	-0.010059
1.026	9.254	98.586	615.02	-0.19346	0.49346	-0.67569	-54.787	23.136	1210.318	-1.8198	1.4673	-1.1245	53.00976	-319.361	1520.214	-1.2729	1.2261	-1.5815	-27.3222	29.508	32.48	0.07627	0.30019	-0.024805
1.028	1.4	94.947	619.738	-0.19209	0.49932	-0.69072	-49.6421	-19.7756	1184.506	-1.7012	1.5313	-1.1729	39.3399	-329.143	1619.508	-1.2891	1.2627	-1.6055	-24.8707	23.9368	1.536	0.078222	0.31777	-0.047071
1.03	-11.6	108.253	641.803	-0.18896	0.50342	-0.70654	-18.6736	-44.403	1166.63	-1.3179	1.5181	-1.1401	19.789	-291.606	1655.96236	-1.3335	1.3618	-1.6577	-38.901	30.0458	25.8584	0.064551	0.33584	-0.082812
1.032	4.486	96.948	636.591	-0.19883	0.50928	-0.72295	-60.458	-53.679	1172.289	-1.0349	1.4114	-1.0144	-15.595	-256.394	1666.2195	-1.366	1.4339	-1.6931	-14.29	56.188	37.0996	0.055176	0.35547	-0.11719
1.034	7.927	101.839	650.605	-0.20596	0.51455	-0.73291	-44.5323	-39.69392	1123.222	-0.86279	1.3032	-0.91748	-24.144	-227.925	1701.76354	-1.3887	1.5098	-1.7246	-6.882	36.312	59.508	0.043066	0.37002	-0.14727
1.036	16.742	110.111	657.982	-0.21416	0.51377	-0.7458	-1.8955	-49.1772	1118.8537	-0.7832	1.1309	-0.8418	-61.6713	-166.411	1688.66072	-1.4199	1.6191	-1.7793	7.876	35.631	39.6926	0.014649	0.39502	-0.19209
1.038	-8.943	110.342	646.073	-0.22226	0.51767	-0.76025	-15.7337	-42.8045	1113.434	-0.78467	1.0688	-0.81396	-110.139	-129.235	1684.108	-1.4219	1.6738	-1.8066	-20.7837	6.873336	15.012	-0.003711	0.41963	-0.2249
1.04	-4.403	120.877	653.836	-0.22852	0.52344	-0.77734	-44.511	-69.827	1140.889	-0.87451	0.97314	-0.77783	-49.147	-75.935	1742.9755	-1.4219	1.7734	-1.8535	16.1241	25.0641	24.3837	-0.022461	0.45313	-0.26015
1.042	2.613	121.512	665.18	-0.23682	0.53184	-0.79746	-33.7381	-81.6371	1170.244	-0.97487	0.92651	-0.75561	-34.904	-50.008	1741.704	-1.3948	1.8361	-1.8748	-12.6347	16.2533	38.495	-0.047852	0.49902	-0.30469
1.044	-7.811	140.152	654.3326	-0.24131	0.54033	-0.81397	-51.3861	-103.828	1198.066	-1.0703	0.89453	-0.74219	-50.371	-93.999	1778.8731	-1.3628	1.8989	-1.9038	-1.045	24.752	44.467	-0.047852	0.52236	-0.31943
1.046	-15.723	133.655	679.778	-0.24912	0.54073	-0.8292	-78.059	-95.324	1202.202	-1.1733	0.86377	-0.74561	-25.4259	-95.8304	1788.944	-1.2939	1.9492	-1.918	-12.37	0.619	27.022	-0.06289	0.57656	-0.37168
1.048	-15.023	127.506	669.446	-0.25811	0.54238	-0.84199	-36.4246	-103.505	1223.1601	-1.2168	0.85742	-0.76367	-52.921	-82.569	1740.434	-1.2603	1.9614	-1.9136	-16.9382	-15.238	21.1683	-0.058984	0.60859	-0.39824
1.05	16.908	135.62	676.168	-0.27148	0.54346	-0.85742	-61.44	-129.6	1221.454	-1.2813	0.87793	-0.83594	-44.714	-79.947	1755.8418	-1.2007	1.9458	-1.8726	-26.84454	-21.244	-6.0549	-0.05791	0.64873	-0.42744
1.052	-15.797	145.993	686.635	-0.2876	0.54541	-0.86572	-71.21	-178.654	1215.159	-1.3101	0.90918	-0.90381	-34.06	-48.281	1750.5636	-1.1577	1.8999	-1.8228	-6.2592	12.841	29.4653	-0.061035	0.68213	-0.45557
1.054	-6.345	138.835	679.188	-0.3083	0.55596	-0.88232	-40.1982	-231.32865	1233.712	-1.3374	0.93896	-0.97607	-60.733	-72.4632	1742.4732	-1.1245	1.8325	-1.7671	-16.214	23.8547	36.6304	-0.060938	0.70039	-0.47764
1.056	-7.515	146.719	685.003	-0.33252	0.55908	-0.89639	-27.886	-285.929	1263.2604	-1.4058	0.979	-1.062	-51.168	-86.156	1777.216	-1.0918	1.7363	-1.6777	-15.759	-9.6342	91.6314	-0.075196	0.71797	-0.5125
1.058	8.73	153.286	683.185	-0.35586	0.56299	-0.90752	-44.654	-298.543	1307.491	-1.459	0.99414	-1.0957	-32.1476	-90.685	1772.68	-1.0737	1.6938	-1.644	-29.309	-23.7393	98.596	-0.082617	0.71328	-0.525
1.06	-4.374	162.423	680.06	-0.38086	0.5708	-0.92236	0.899999999999999	-296.676	1317.31478	-1.582	1.0283	-1.1621	-61.768	-114.787	1771.284	-1.0405	1.6333	-1.5894	-46.0935	-35.252	100.388	-0.1166	0.71709	-0.56026
1.062	-8.41	164.845	679.117	-0.4001	0.57949	-0.93066	47.4114	-285.29	1315.603	-1.6843	1.073	-1.2097	-54.3335	-86.154	1761.791	-1.0027	1.6125	-1.5632	-8.962	9.237	139.17	-0.17627	0.71729	-0.61279
1.064	6.406	158.901	694.117	-0.41611	0.58994	-0.94404	32.3459	-266.199	1356.628	-1.7729	1.1323	-1.2651	-25.369	-40.8987	1668.4033	-0.95508	1.5957	-1.5371	-81.1681	19.93956	301.667	-0.23809	0.69277	-0.64922
1.066	-5.666	169.365	688.831	-0.43604	0.6083	-0.96474	-9.132	-223.3346	1449.9428	-1.8457	1.2188	-1.3223	-39.69	-14.444	1584.067	-0.88623	1.5825	-1.5093	-92.8617	57.4799	471.715	-0.34336	0.67558	-0.70898
1.068	3.213	157.782	687.753	-0.44951	0.61846	-0.97295	12.892	-205.9996	1510.779	-1.8687	1.27	-1.3472	1.94600000000001	19.9159	1559.183	-0.83911	1.5784	-1.4939	-105.2228	27.347	644.916	-0.50664	0.66153	-0.77929
1.07	-4.088	158.67	688.878	-0.4585	0.62939	-0.97803	-19.304	-193.5639	1549.287	-1.9336	1.3867	-1.4189	-4.556	17.5688	1521.322	-0.79639	1.5728	-1.4722	-47.0709	34.027	867.082	-0.72246	0.65195	-0.8414
1.072	8.57599999999999	167.131	691.166	-0.46826	0.64307	-0.99131	-42.865	-158.116	1582.687	-1.9724	1.5071	-1.4812	-9.452	-6.2405	1525.57	-0.75684	1.5571	-1.439	-66.7523	46.719135	1117.022	-1.0049	0.66211	-0.92773
1.074	14.82	168.017	679.381	-0.4792	0.65244	-0.99443	-42.245	-117.961	1584.0685	-2.0195	1.6152	-1.5449	33.1594	19.118	1500.128	-0.73389	1.5435	-1.4214	-40.799	81.5617	1388.762	-1.3284	0.6667	-0.98544
1.076	0.625999999999998	183.687	678.113	-0.49405	0.66338	-0.99522	-26.08	-83.887	1576.053	-2.0659	1.7739	-1.6323	18.3213	22.626	1411.049	-0.70752	1.5044	-1.3784	-92.6129	84.076	1526.589	-1.6894	0.70947	-1.073
1.078	11.189	180.439	680.808	-0.50019	0.66562	-0.98516	-56.0524	-74.856	1583.139	-2.0874	1.8364	-1.6636	4.332	38.1154	1389.113	-0.68701	1.4797	-1.3425	-99.9333	9.838	1596.819	-2.0238	0.75088	-1.1159
1.08	8.733	175.719	689.071	-0.51416	0.66846	-0.97607	-48.278	-99.105	1589.237	-2.1016	1.9395	-1.7227	12.195	67.028	1328.119	-0.67529	1.4517	-1.3101	-89.033	-62.405	1583.298	-2.3085	0.83799	-1.1298
1.082	21.889	180.01	687.301	-0.51768	0.6624	-0.96377	-58.4968	-137.3279	1628.7308	-2.0722	1.9805	-1.7403	-39.692	48.955	1314.579	-0.65234	1.4141	-1.2617	-111.924	-140.311	1557.098	-2.4683	0.93604	-1.1089
1.084	3.828	172.476	683.597	-0.5207	0.65176	-0.95235	-80.528	-147.743	1681.516	-2.0234	2	-1.7422	-18.84	45.865	1326.22643	-0.63916	1.3911	-1.2417	-24.63	-133.2164	1490.263	-2.4935	1.0821	-1.0903
1.086	17.548	171.867	687.545	-0.52148	0.64004	-0.93047	-49.23672	-144.527	1733.979	-1.9272	1.9888	-1.7222	-12.541	33.7428	1274.6752	-0.60889	1.3423	-1.1812	-44.027	-146.218	1486.46	-2.3733	1.2149	-1.0677
1.088	7.609	168.937	674.395	-0.51748	0.62197	-0.91045	-7.413	-141.227	1725.4609	-1.8726	1.9634	-1.7007	-41.375	-0.1671	1250.46	-0.58667	1.3034	-1.1492	-66.298	-147.104	1473.926	-2.1542	1.32	-1.0923
1.09	0.109999999999999	183.976	664.841	-0.51563	0.59961	-0.89844	-68.9193	-134.787	1740.058	-1.7603	1.8755	-1.6362	-14.792	20.788	1221.908	-0.56006	1.2485	-1.1069	-68.534	-244.38	1397.397	-1.8498	1.3502	-1.1139
1.092	5.48999999999999	191.444	652.915	-0.50713	0.58076	-0.8794	-123.422	-118.185	1728.704	-1.6778	1.7988	-1.5772	-45.9	38.874	1147.77	-0.5249	1.1802	-1.0425	61.884	-297.98	1325.802	-1.5308	1.3364	-1.105
1.094	8.844	176.658	650.027	-0.51045	0.55869	-0.8585	-85.687	-116.835	1715.682	-1.6167	1.7212	-1.519	-57.403	41.135	1147.6019	-0.51025	1.145	-1.0249	113.661	-335.15	1295.5921	-1.3227	1.2586	-1.0859
1.096	8.98799999999999	178.464	654.178	-0.51787	0.53213	-0.84912	-85.211	-95.8663	1715.93	-1.5742	1.6348	-1.4512	-32.129	70.863	1120.47	-0.48242	1.0723	-0.98047	103.014	-247.978	1417.482	-1.2547	1.1598	-1.0781
1.098	-16.488	188.604	654.461	-0.52861	0.51767	-0.83916	-114.566	-90.7543	1730.301	-1.5718	1.5981	-1.4292	-63.4706	58.797	1083.5277	-0.46558	1.0217	-0.94116	12.48	-187.86	1502.53	-1.3215	1.0281	-1.0723
1.1	12.752	190.062	654.798	-0.54639	0.50732	-0.82568	-68.6699	-91.462	1707.3921	-1.5762	1.5547	-1.3945	-28.7169	67.987	1090.387	-0.45264	0.97314	-0.91553	-73.155	-149.12	1500.199	-1.461	0.90507	-1.0539
1.102	4.024	178.91	649.153	-0.56074	0.5045	-0.81719	-38.5693	-103.9926	1655.474	-1.5877	1.5374	-1.3835	-15.1535	127.181	1022.583	-0.43213	0.90869	-0.87256	-36.219	-193.46	1436.6738	-1.6328	0.79883	-1.043
1.104	7.457	174.493	649.149	-0.5663	0.51299	-0.80576	-73.231	-103.926	1610.473	-1.5972	1.5298	-1.3706	-76.15	148.223	983.423	-0.42041	0.88184	-0.84766	28.2072	-238.84	1443.1658	-1.7783	0.74414	-1.0635
1.106	-18.025	165.776	645.063	-0.56474	0.52901	-0.79834	-43.584	-81.634	1569.327	-1.5854	1.5317	-1.3647	-45.3658	173.71	962.9564	-0.39453	0.83105	-0.81055	20.8397	-274.8	1488.022	-1.8719	0.73261	-1.1051
1.108	-6.211	154.6644	640.923	-0.55654	0.54561	-0.79951	-45.603	-64.336	1560.4484	-1.5737	1.5278	-1.3628	-53.2243	175.947	881.59	-0.36719	0.79248	-0.78613	-39.384	-289.249	1501.504	-1.9238	0.74863	-1.1586
1.11	4.589	157.8933	649.977	-0.54443	0.56885	-0.80225	-45.593	-29.6848	1522.146	-1.5391	1.5195	-1.3516	-83.341	141.3115	843.601	-0.3374	0.75586	-0.76367	-34.8226	-332.343	1503.498	-1.9432	0.78262	-1.2168
1.112	-20.373	157.575	660.268	-0.52988	0.59238	-0.8082	-18.681	-3.892	1512.12	-1.5107	1.5059	-1.3408	-40.6814	152.398	855.28836	-0.29932	0.70654	-0.73779	-14.3908	-390.698	1518.3774	-1.9507	0.82861	-1.2769
1.114	-13.49	156.701	674.83	-0.52139	0.60908	-0.81533	24.983	-2.704	1499.187	-1.4785	1.4873	-1.3262	-29.23482	147.753	817.1468	-0.27979	0.67969	-0.71094	38.6064	-431.73	1575.318	-1.9559	0.86846	-1.3177
1.116	-19.381	149.649	706.8	-0.51709	0.62549	-0.82627	-48.7367	-20.7798	1498.848	-1.4409	1.4595	-1.3022	-17.6144	138.787	809.581	-0.24609	0.62354	-0.66748	119.745	-430.4	1587.406	-1.9686	0.9126	-1.3452
1.118	-7.854	158.7911	741.52	-0.52471	0.63281	-0.84004	-36.0505	-26.1904	1477.7771	-1.4238	1.4453	-1.2871	17.522	175.009	733.8255	-0.22974	0.59888	-0.65747	130.153	-399.54	1650.61	-1.9956	0.96924	-1.3769
1.12	-9.291	167.9646	784.8	-0.53809	0.64502	-0.85889	13.511	-27.4846	1469.8248	-1.3867	1.4102	-1.251	-16.367	149.4628	658.243	-0.21338	0.5625	-0.63281	45.6371	-343.207	1730.884	-2.0368	1.0186	-1.4028
1.122	2.436	177.651	836.32	-0.56298	0.64131	-0.88213	-10.485	-8.048	1431.255	-1.3542	1.3762	-1.2224	22.689	146.934	657.421	-0.19922	0.52832	-0.60938	-36.576	-262.205	1826.5029	-2.0859	1.0703	-1.4238
1.124	19.064	199.479	883.59	-0.5918	0.6334	-0.91406	-20.236	-15.529	1423.8652	-1.3179	1.3384	-1.189	30.825	144.2882	628.8988	-0.1875	0.50244	-0.59033	-69.523	-200.3651	1869.054	-2.1545	1.1224	-1.4471
1.126	20.892	228.324	948.79	-0.62734	0.62598	-0.95195	20.513	-26.366	1385.689	-1.269	1.2817	-1.1411	-0.320999999999998	108.413	622.1762	-0.1748	0.45947	-0.55518	-59.497	-137.679	1842.556	-2.2238	1.1676	-1.4781
1.128	29.0873	244.172	1003.55	-0.68008	0.61816	-0.99317	7.022	-35.784	1358.97622	-1.2441	1.25	-1.1201	49.7518	120.3415	617.446	-0.16162	0.43042	-0.53736	-72.0291	-87.953	1794.011	-2.2984	1.2132	-1.5121
1.13	4.647	239.402	1066.35	-0.74463	0.61768	-1.0308	-31.0165	-24.267	1335.1243	-1.189	1.1802	-1.0698	26.239	137.113	534.228	-0.14258	0.40625	-0.52295	-140.243	-35.58	1762.378	-2.3467	1.2607	-1.5354
1.132	37.851	221.876	1120.13	-0.82383	0.62285	-1.0687	-27.7701	-19.235	1310.428	-1.1521	1.1262	-1.0281	2.873	136.139	517.467	-0.11279	0.37158	-0.49268	-112.725	9.31	1727.884	-2.3906	1.3242	-1.5781
1.134	46.3951	196.011	1171.24	-0.89092	0.63886	-1.0923	-47.7552	-0.355999999999998	1262.7149	-1.1206	1.0688	-0.9917	18.272	169.987	480.902	-0.099121	0.34912	-0.47852	-77.021	19.221	1737.822	-2.3865	1.3783	-1.6037
1.136	31.265	176.9284	1211.88	-0.94639	0.6666	-1.1177	-47.8234	41.2662	1235.188	-1.084	0.99414	-0.94336	-10.197	153.481	406.89	-0.067383	0.31689	-0.45166	-3.0059	-13.9287	1760.466	-2.3303	1.4204	-1.6163
1.138	17.013	119.258	1217.52	-0.9831	0.70752	-1.1362	-3.286	73.478	1208.087	-1.0698	0.95752	-0.92139	26.782	138.5985	408.0102	-0.043213	0.29785	-0.44287	-6.427	-89.318	1781.259	-2.2509	1.4466	-1.6206
1.14	8.617	56.353	1210.37	-1.0034	0.75439	-1.1421	-43.6807	77.319	1195.7824	-1.04	0.89063	-0.87695	20.483	140.4214	381.8477	-0.017578	0.27734	-0.42383	-4.001	-94.832	1834.896	-2.1637	1.4433	-1.6122
1.142	10.068	0.450000000000003	1202.56	-0.99424	0.80772	-1.1329	-80.189	78.401	1203.18	-1.0149	0.84009	-0.8396	-13.2946	113.297	356.2923	0.01416	0.23242	-0.39648	-38.013	-38.4573	1831.043	-2.0757	1.4302	-1.5894
1.144	-22.923	-37.82	1189.42	-0.97696	0.86133	-1.127	-49.192	91.419	1168.682	-0.99365	0.80029	-0.81201	21.7481	123.7182	348.2826	0.026855	0.21045	-0.38428	-53.3874	0.370999999999999	1821.595	-2.0131	1.4046	-1.5451
1.146	-6.118	-76.23	1172.36	-0.93984	0.90703	-1.0984	-73.045	101.459	1109.7389	-0.95313	0.73438	-0.75977	-20.592	149.484	288.3653	0.042969	0.18359	-0.37061	-84.283	9.64	1808.155	-1.9614	1.3821	-1.4912
1.148	-14.033	-96.399	1153.67	-0.8876	0.9417	-1.0525	-74.731	134.1407	1059.684	-0.92334	0.70557	-0.74072	-63.2058	132.42877	259.0626	0.060792	0.16211	-0.35498	-143.438	-27.143	1802.869	-1.9239	1.3509	-1.435
1.15	-8.368	-109.115	1121	-0.82764	0.96924	-1.0034	-38.19685	147.024	1011.278	-0.89063	0.67188	-0.71826	-9.478	158.238	268.2987	0.072266	0.14111	-0.34131	-129.968	-75.089	1783.154	-1.8928	1.3196	-1.3776
1.152	-34.61	-119.114	1100.07	-0.74873	0.96533	-0.93545	-8.554	137.8753	965.046	-0.86352	0.62475	-0.68702	-76.67	127.846	242.7133	0.091797	0.11768	-0.32275	-79.6633	-118.706	1784.981	-1.8477	1.291	-1.3301
1.154	-36.043	-119.767	1072.97	-0.67373	0.95049	-0.87022	-45.264	111.4072	953.6814	-0.82568	0.58057	-0.65186	-58.879	104.8263	261.5364	0.10303	0.091797	-0.3042	-66.174	-108.772	1732.116	-1.8076	1.2458	-1.2881
1.156	-43.2	-102.63	1037.69	-0.61396	0.91924	-0.80615	-21.134	105.7279	918.9319	-0.77832	0.53125	-0.61719	-36.33132	115.216	234.20742	0.11963	0.075684	-0.29004	-33.2638	-73.745	1650.918	-1.7556	1.1974	-1.2572
1.158	-52.465	-89.238	1003.87	-0.57344	0.88125	-0.74922	-10.9851	97.042	919.465	-0.7439	0.49927	-0.59838	-104.059	69.241	216.2814	0.12671	0.057618	-0.2749	18.5701	-16.581	1561.982	-1.7105	1.1608	-1.2242
1.16	-54.672	-72.732	984.01	-0.55908	0.83984	-0.69727	-8.8448	114.416	891.3867	-0.70654	0.45996	-0.57178	-55.4547	76.555	217.448	0.13281	0.044922	-0.25684	44.0195	-14.01947	1521.6532	-1.656	1.1203	-1.2002
1.162	-92.585	-81.719	959.8	-0.57129	0.79238	-0.65742	7.033	128.4011	855.3023	-0.66406	0.41113	-0.53223	-59.201	78.8185	148.775	0.14111	0.032715	-0.25195	3.349	45.708	1524.913	-1.6016	1.0781	-1.1797
1.164	-79.284	-94.927	965.474	-0.60683	0.74766	-0.62627	1.864	139.2656	807.85	-0.64014	0.38135	-0.5127	-61.9153	65.887	132.8004	0.13965	0.025879	-0.2373	11.925	77.2094	1482.1637	-1.5461	1.0466	-1.1639
1.166	-95.0903	-121.363	924.669	-0.65527	0.71367	-0.60947	-0.667	142.733	777.051	-0.60547	0.35303	-0.5	-19.172	104.02	136.03578	0.14844	0.0097656	-0.21436	43.5775	128.057	1443.105	-1.4947	1.016	-1.1494
1.168	-117.1563	-142.542	922.027	-0.71006	0.69092	-0.60283	1.2643	151.001	739.6864	-0.57446	0.31494	-0.47314	-62.7482	69.382	118.5682	0.15356	0.01294	-0.21338	6.7986	163.03	1383.152	-1.4559	0.97638	-1.1268
1.17	-116.9537	-167.575	903.1	-0.77637	0.68799	-0.61279	30.359	137.767	721.409	-0.54395	0.27881	-0.4502	-45.3324	50.122	130.5148	0.15332	0.0048828	-0.20752	-12.8132	206.711	1383.2098	-1.4242	0.93407	-1.1027
1.172	-132.148495	-191.374	887.131	-0.84717	0.70498	-0.63623	11.2267	132.618	693.442	-0.50879	0.25586	-0.4375	-13.904	80.535	94.5701	0.16211	-0.0029297	-0.19092	-27.8638	212.385	1335.142	-1.3979	0.89502	-1.0737
1.174	-116.199	-218.859	879.411	-0.90088	0.75029	-0.66748	21.7174	126.5873	678.432	-0.48145	0.24023	-0.41895	-25.768	72.955	41.395	0.16113	-0.0083008	-0.18506	-27.8512	196.002	1305.821	-1.3747	0.84642	-1.039
1.176	-134.0753	-240.834	901.5074	-0.93838	0.80185	-0.70732	50.323	119.8082	619.728	-0.44434	0.21436	-0.4043	-6.09	93.377	57.781	0.16211	-0.020996	-0.16699	11.21	203.396	1236.922	-1.3356	0.79975	-1.0012
1.178	-101.064	-262.414	941.538	-0.96748	0.86826	-0.74619	40.1413	101.847	586.006	-0.41992	0.19385	-0.38623	-23.844	108.039	42.76	0.15918	-0.019043	-0.16259	0.2248	187.209	1186.861	-1.2922	0.75872	-0.96251
1.18	-126.129497	-280.077	968.274	-0.99609	0.94141	-0.79297	-1.471	109.163	577.4721	-0.38623	0.1665	-0.36279	-46.788	66.895	32.706	0.1582	-0.019043	-0.15869	57.539	221.582	1176.851	-1.2362	0.72235	-0.93036
1.182	-111.751	-284.669	973.305	-1.0245	1.0145	-0.82578	11.5598	111.52	555.953	-0.34473	0.15771	-0.35352	30.822	90.636	36.878	0.15625	-0.024414	-0.14502	23.9717	227.7402	1168.872	-1.1807	0.68555	-0.90137
1.184	-122.472	-270.823	987.256	-1.0624	1.0899	-0.86787	17.427	126.7582	511.9378	-0.32324	0.14111	-0.34131	-14.11	49.8721	26.938	0.16211	-0.025391	-0.13672	13.2787	231.178	1175.7722	-1.1142	0.65171	-0.86172
1.186	-127.018	-256.879	1002.8846	-1.1077	1.1571	-0.91006	-6.016	140.709	481.2508	-0.28271	0.12891	-0.31982	-19.186	31.078	44.5679	0.17139	-0.025879	-0.12549	11.1597	194.45	1113.014	-1.0559	0.61877	-0.83291
1.188	-117.796	-234.8113	1020.8505	-1.1594	1.2218	-0.95039	-15.0673	144.93	452.048	-0.25952	0.12695	-0.3191	38.121	63.132	43.4692	0.17797	-0.027588	-0.11963	16.9664	179.507	1083.127	-0.99967	0.58991	-0.79934
1.19	-134.326	-210.138	1036.2042	-1.209	1.2773	-0.98828	0.723999999999998	132.536	433.5226	-0.23145	0.11523	-0.30469	-24.155	34.1169	-7.678	0.18799	-0.027832	-0.11865	-7.7144	226.792	1030.705	-0.9407	0.55364	-0.76666
1.192	-127.493	-198.543	1046.3111	-1.253	1.3309	-1.028	-54.77	123.8085	426.925	-0.19336	0.090332	-0.27539	10.213	51.17	4.7249	0.19922	-0.027832	-0.097656	-20.366	271.154	1008.324	-0.88623	0.51416	-0.72803
1.194	-136.0213	-202.005	1066.967	-1.2827	1.3759	-1.0682	-42.1105	118.297	396.0559	-0.18018	0.088379	-0.271	-3.551	41.067	17.394	0.20605	-0.025879	-0.092773	-13.5744	328.281	935.0093	-0.82169	0.48148	-0.69233
1.196	-116.8946	-183.808	1085.7416	-1.2824	1.4153	-1.0991	-41.6974	83.415	387.8295	-0.14648	0.07666	-0.25342	-50.5698	-15.6859	30.45	0.2207	-0.03418	-0.075195	-37.17	323.902	863.4349	-0.76839	0.4445	-0.66699
1.198	-121.332	-174.3511	1094.0346	-1.2677	1.4476	-1.1243	-52.3681	76.933	362.5165	-0.12427	0.074463	-0.25049	22.537	21.4851	44.4597	0.23437	-0.046875	-0.059082	-6.60089	319.743	794.0821	-0.70161	0.40254	-0.62727
1.2	-107.134	-156.0545	1079.8867	-1.2319	1.4771	-1.1479	-49.36568	82.9097	314.4462	-0.10596	0.069336	-0.23486	-39.5771	13.3744	34.815	0.24561	-0.048828	-0.052246	-16.98	257.649	774.7197	-0.64515	0.36637	-0.59815
1.202	-87.425	-140.452	1103.4053	-1.1713	1.4867	-1.1515	-32.8461	95.484	265.727	-0.078613	0.056641	-0.22852	-47.5093	10.9251	44.2163	0.25488	-0.06543	-0.043945	3.7045	293.871	742.03037	-0.57813	0.31836	-0.55811
1.204	-100.649	-138.889	1116.200728	-1.0925	1.4818	-1.1463	-41.821	90.35192	244.573	-0.061523	0.050293	-0.21826	-20.477	54.469	41.43699	0.25488	-0.068359	-0.044922	1.2649	292.055	702.1572	-0.52249	0.27876	-0.53488
1.206	-83.903	-141.514	1132.5722	-0.99756	1.4501	-1.1311	-74.971	86.0676	237.3078	-0.030273	0.033203	-0.19727	-58.51279	24.7483	22.0007	0.26172	-0.089355	-0.035156	1.02	286.201	644.7323	-0.47457	0.23861	-0.50211
1.208	-88.941	-172.9825	1149.306	-0.89805	1.3883	-1.0933	-43.8873	56.853	226.852	-0.01416	0.032227	-0.1958	-30.492	44.522	8.024	0.25977	-0.11816	-0.016113	6.5392	235.616	575.4588	-0.42664	0.2043	-0.47719
1.21	-76.511	-185.06	1133.759	-0.80615	1.311	-1.0503	-38.7017	45.004	204.829	-0.0024414	0.032715	-0.1958	-33.4681	48.714	-4.1832	0.25391	-0.12744	-0.01416	12.2069	199.2035	511.6091	-0.39114	0.16631	-0.44917
1.212	-90.952	-195.101	1115.7079	-0.74707	1.2299	-1.0072	-34.5912	60.8542	205.5779	0.015625	0.03125	-0.1958	-86.209	10.6884	20.5936	0.23389	-0.13232	-0.013184	16.6416	197.518	464.1137	-0.33252	0.10645	-0.40186
1.214	-114.995	-179.72	1095.764	-0.71494	1.1618	-0.95654	-14.9427	66.1098	193.5164	0.036133	0.023438	-0.18896	-37.093	54.455	40.2366	0.22266	-0.14453	-0.021484	0.911999999999999	204.1429	448.503	-0.26928	0.073276	-0.37237
1.216	-112.421	-172.242	1069.035	-0.71573	1.1017	-0.91123	-20.4339	61.6055	170.6913	0.057129	0.02002	-0.18457	-58.4686	38.326	11.582	0.20947	-0.14404	-0.018555	2.5655	234.369	430.8519	-0.23038	0.054199	-0.36991
1.218	-115.345	-173.7515	1061.19198	-0.72705	1.0495	-0.86943	-36.133	76.038	144.1162	0.071778	0.017578	-0.17749	-64.9141	24.106	19.9277	0.2002	-0.13818	-0.01416	2.8196	190.7603	410.6796	-0.20463	0.029242	-0.35901
1.22	-87.1483	-168.7176	1049.8845	-0.74365	1.0142	-0.82373	-9.6602	83.62	110.5374	0.085938	0.022461	-0.18506	-13.296	47.64	23.3564	0.19434	-0.13086	-0.021484	23.7711	172.812	346.953	-0.17374	0.010357	-0.33409
1.222	-109.9594	-174.1662	1019.6943	-0.75537	0.99971	-0.79717	12.8554	62.532	102.503	0.10547	0.023926	-0.18506	-52.3308	-0.900399999999999	40.452	0.18945	-0.11572	-0.032227	-1.3294	133.304	316.151	-0.15967	0.0024414	-0.33252
1.224	-80.604	-159.734	1005.095	-0.75625	0.99101	-0.76953	15.147	51.2597	106.7983	0.11768	0.017578	-0.17871	-38.4732	27.4324	39.178	0.1858	-0.10351	-0.038574	31.8708	149.801	274.689	-0.1455	-0.029996	-0.31893
1.226	-108.646	-134.6127	982.389	-0.74804	0.99531	-0.75429	-5.232	45.09485	77.158	0.13574	0.023926	-0.17139	-21.801	39.917	7.31073	0.18652	-0.09082	-0.039063	6.9996	154.7126	259.611	-0.12588	-0.07697	-0.28232
1.228	-103.559	-92.7919	945.662	-0.7291	1.003	-0.74238	16.865	37.7518	60.407	0.15552	0.0095214	-0.16772	-33.882	-7.112	28.132	0.18652	-0.077148	-0.04541	7.8547	182.1824	221.80623	-0.12432	-0.11837	-0.26592
1.23	-89.262	-73.597	927.0955	-0.70068	1.0142	-0.73584	-0.927	35.4282	50.933	0.16455	0.011719	-0.16748	-0.716999999999999	28.7864	28.734	0.18701	-0.071289	-0.046387	3.5658	166.6118	162.802	-0.13623	-0.15411	-0.25303
1.232	-76.041	-84.791	929.5387	-0.67793	1.0271	-0.73301	-2.493	50.877	42.6769	0.18311	0.0014648	-0.15234	-21.478	-1.311	20.96655	0.18945	-0.063477	-0.050293	17.8278	133.99	137.387	-0.14941	-0.18359	-0.2373
1.234	-71.186	-87.471	921.2439	-0.66016	1.0397	-0.7293	6.308	45.106	46.1844	0.19238	-0.0048828	-0.14893	-2.054	-1.193	24.017	0.19824	-0.05664	-0.053222	11.956	140.074	131.797	-0.17832	-0.1873	-0.23848
1.236	-91.3977	-97.485	911.2754	-0.64609	1.0459	-0.73555	3.529	44.401	42.1061	0.20752	-0.011719	-0.13672	24.221	46.34077	9.904	0.20313	-0.057129	-0.055176	-19.712	135.079	149.55	-0.20341	-0.17081	-0.23994
1.238	-80.0985	-98.8695	894.611	-0.6292	1.0482	-0.73193	-17.094	46.974	25.8097	0.21875	-0.021728	-0.12329	-1.426	6.475	25.2705	0.2124	-0.055664	-0.062012	-6.073	162.4713	120.8843	-0.22607	-0.14541	-0.24971
1.24	-93.739	-102.0092	877.09	-0.60889	1.0493	-0.73291	-25.5274	50.177	25.9609	0.22412	-0.021973	-0.1123	13.431	36.9309	30.708	0.2168	-0.055664	-0.058594	-59.209	147.527	108.2145	-0.23721	-0.12207	-0.25615
1.242	-86.136	-91.1026	862.6031	-0.5874	1.0361	-0.73389	-30.5259	22.351	33.046	0.23193	-0.036133	-0.10254	1.129	52.634	10.8606	0.2251	-0.05957	-0.057129	-57.04	151.513	66.189	-0.23877	-0.10205	-0.26123
1.244	-85.288	-89.6747	831.4966	-0.56094	1.027	-0.72539	-48.82807	16.4883	21.5104	0.22998	-0.041992	-0.095703	-16.037	30.09589	0.8964	0.22461	-0.068603	-0.051758	-48.9116	100.438	81.045	-0.24668	-0.081445	-0.26768
1.246	-85.157	-94.50497	809.0408	-0.53554	1.007	-0.72109	-28.5552	15.9108	0.7167	0.23682	-0.067871	-0.069336	15.873	59.083	9.34195	0.22314	-0.070801	-0.053711	-10.532	122.572	100.213	-0.25469	-0.059668	-0.27324
1.248	-64.076	-96.9567	810.29021	-0.50225	0.98369	-0.70947	-38.6853	11.7707	-2.3824	0.23315	-0.073975	-0.066895	-41.0437	18.8924	17.0463	0.22266	-0.070801	-0.060547	-57.0615	79.7931	84.6435	-0.26446	-0.035058	-0.28145
1.25	-63.225	-83.403	796.862	-0.45898	0.94531	-0.69141	-41.2612	22.8697	0.0533000000000001	0.22656	-0.085449	-0.063477	-32.3448	19.619	33.8878	0.22266	-0.074707	-0.062012	-60.745	85.4234	81.201	-0.26709	-0.01123	-0.28115
1.252	-55.766	-73.26	774.189	-0.42529	0.91631	-0.67666	-30.5137	27.4011	12.1972	0.22119	-0.10449	-0.040527	13.424	47.9433	24.182	0.21973	-0.076172	-0.066406	-43.582	47.9769	51.5184	-0.2627	0.0063477	-0.27686
1.254	-81.181	-59.115	742.77419	-0.39189	0.87939	-0.65772	-38.5569	20.0489	16.1088	0.21875	-0.11523	-0.02832	-43.40764	7.748	17.067	0.21436	-0.072754	-0.06543	-39.5243	28.1773	58.1641	-0.25586	0.019238	-0.26289
1.256	-53.321	-40.3191	718.8678	-0.35518	0.84931	-0.64326	-53.112	15.4362	1.26912	0.19775	-0.1167	-0.029297	-28.249	18.7872	18.5436	0.20947	-0.071289	-0.069336	-20.799	42.493	57.07692	-0.24405	0.022559	-0.25703
1.258	-59.044	-19.69	698.2019	-0.32598	0.80898	-0.625	-26.828	26.76574	7.70724	0.1814	-0.12841	-0.023926	-35.724	26.8124	2.2338	0.20313	-0.070313	-0.071777	-19.26	-1.3276	56.313	-0.22959	0.022559	-0.24493
1.26	-71.248	-18.115	686.263	-0.29199	0.76953	-0.60156	-32.9594	17.1911	18.3473	0.15918	-0.13477	-0.019531	-58.3484	9.219	22.501	0.20313	-0.068359	-0.078125	-37.147	1.02	16.35756	-0.2167	0.013086	-0.23291
1.262	-79.126	-16.751	683.513	-0.271	0.73584	-0.58535	-33.1216	22.26915	24.9956	0.13721	-0.13184	-0.01123	-9.527	52.574	21.8037	0.19971	-0.062012	-0.084473	-45.845	-35.194	9.6496	-0.2041	0.0073242	-0.22217
1.264	-66.167	-18.855	660.2756	-0.2499	0.70381	-0.56943	-39.8412	30.7553	-1.7199	0.11963	-0.13135	-0.003418	-61.907	19.9696	30.7844	0.1914	-0.056884	-0.089356	-44.786	1.04457	2.155	-0.18818	-0.0038086	-0.20889
1.266	-80.4155	-30.238	619.4823	-0.22569	0.66904	-0.55186	-20.8701	35.0093	5.02309	0.083008	-0.12891	0.0024414	-65.913	5.72	52.3762	0.1875	-0.053223	-0.10547	-39.924	-5.4548	25.345	-0.17461	-0.012012	-0.19521
1.268	-110.975	-27.591	586.431	-0.21348	0.63896	-0.54209	-34.2528	26.2326	8.80929	0.054444	-0.10351	-0.0039063	-39.0946	32.6991	31.265	0.18896	-0.04541	-0.11084	18.653	37.245	45.54	-0.15859	-0.012012	-0.19013
1.27	-75.548	-20.39469	552.476	-0.1958	0.60986	-0.51221	-15.449	12.8535	8.9891	0.038574	-0.079102	-0.016113	-75.0259	16.13	19.296	0.18604	-0.047363	-0.12012	1.811	23.5012	24.8294	-0.13906	-0.0083984	-0.18545
1.272	-74.542	-8.2748	528.016	-0.18349	0.57666	-0.50068	19.592	14.0823	15.58024	0.061035	-0.07666	-0.02832	-30.321	51.0733	12.309	0.18896	-0.041016	-0.1377	-6.2447	40.259	1.068	-0.093262	-0.022949	-0.15869
1.274	-62.214	-3.7689	518.885	-0.1665	0.54951	-0.48525	-1.103	28.1378	18.0175	0.086426	-0.078613	-0.028809	-60.6771	53.775	-4.24	0.18652	-0.035889	-0.14844	-15.7917	34.52	0.755400000000001	-0.050293	-0.033301	-0.13916
1.276	-83.3755	-20.9222	525.7307	-0.16065	0.52295	-0.47197	37.503	33.461	13.6787	0.11133	-0.068848	-0.020508	-56.0137	29.39	15.61642	0.18506	-0.033203	-0.16504	12.8466	35.7977	11.4728	-0.011035	-0.036523	-0.13418
1.278	-56.603	-23.93	525.343	-0.15225	0.49502	-0.4542	23.4	32.7928	17.3219	0.1189	-0.065674	-0.0019531	0.0410000000000004	58.605	5.362	0.17822	-0.022461	-0.18848	1.499	20.305	12.4165	0.027637	-0.038867	-0.11816
1.28	-57.036	-18.9865	512.0168	-0.13965	0.46533	-0.43555	3.574	13.6631	8.4612	0.11279	-0.063477	0.0058594	-40.4306	28.9731	0.532	0.17139	-0.016113	-0.20313	25.647	-11.12	23.1694	0.061426	-0.046484	-0.10625
1.282	-70.318	4.6295	483.6603	-0.13184	0.43574	-0.41914	5.135	12.4217	10.6262	0.10938	-0.0625	0.010742	-4.036	29.42223	37.755	0.15576	-0.00048828	-0.22266	11.381	-1.905	-36.4272	0.099609	-0.068848	-0.081055
1.284	-68.753	9.0747	479.0158	-0.12569	0.41524	-0.40283	38.2346	13.33	24.96171	0.10938	-0.060059	0.0097656	-7.011	36.212	38.35984	0.13769	0.015137	-0.24316	-26.8919	-26.3	-36.4524	0.12959	-0.07793	-0.074707
1.286	-79.285	13.0593	456.3308	-0.11905	0.38633	-0.38838	6.5854	12.7	33.7629	0.11914	-0.061523	0.010254	-30.495	12.466	25.7337	0.11865	0.034668	-0.26318	-8.492	30.62	-23.23521	0.15469	-0.084375	-0.07041
1.288	-66.306	23.687	425.528	-0.11552	0.35996	-0.37403	4.048	17.0639	36.6365	0.12573	-0.058594	0.0021973	23.389	37.091	20.1839	0.086914	0.04541	-0.29688	-43.0874	21.46597	25.6878	0.18242	-0.083985	-0.064551
1.29	-81.6505	17.8402	401.1486	-0.11133	0.34375	-0.36328	21.0313	13.7576	30.246	0.13867	-0.057617	0	4.086	28.2	11.162	0.064941	0.0625	-0.30176	-30.6494	65.039	48.548	0.2206	-0.093359	-0.043164
1.292	-73.798	7.729	408.8681	-0.11006	0.31914	-0.3458	-9.739	7.2407	14.9107	0.14795	-0.062012	0.0048828	-5.142	-14.1658	54.685	0.01416	0.07666	-0.34326	-23.2763	31.293	35.72384	0.27539	-0.11865	-0.0053711
1.294	-63.676	18.81845	393.2201	-0.10713	0.29375	-0.33652	-18.9749	16.7105	10.95	0.15723	-0.068848	0.0097656	15.592	-5.401	82.7639	-0.03711	0.09253	-0.36841	-1.005	48.8057	22.641	0.2999	-0.097658	-0.029688
1.296	-52.634	30.6076	379.0274	-0.10908	0.27578	-0.33027	1.8742	12.9465	19.87246	0.15918	-0.071289	0.015137	-32.111	-13.4296	86.7752	-0.10156	0.10254	-0.39844	-37.1445	28.543	21.42	0.3373	-0.10274	-0.028906
1.298	-57.125	37.119	355.045	-0.11162	0.26397	-0.32129	-34.2843	9.0336	8.036	0.1582	-0.083984	0.015625	26.133	12.7802	126.1342	-0.19482	0.10254	-0.44043	-48.7137	22.668	54.532	0.38574	-0.11367	-0.014453
1.3	-58.571	34.99053	356.007	-0.11328	0.25049	-0.31592	-36.4739	15.367	12.599	0.15723	-0.084961	0.01123	40.5079	35.8795	189.6846	-0.25049	0.10645	-0.47412	-53.7031	37.2554	31.207	0.40742	-0.12646	-0.00791
1.302	-33.854	33.4147	358.4685	-0.11504	0.2374	-0.30195	-15.8723	11.1904	9.46	0.15625	-0.080566	0.010254	-10.9666	23.7457	283.5597	-0.38525	0.10645	-0.55029	-55.06682	31.143	3.555	0.41309	-0.13916	-0.025879
1.304	-44.498	40.3042	351.4713	-0.12158	0.22764	-0.29834	-47.363	15.91	10.2287	0.15796	-0.080078	0.0073242	42.108	52.8201	376.92	-0.51636	0.12329	-0.62427	-36.89	67.951	-30.137	0.42519	-0.15439	-0.017187
1.306	-65.187	37.505	353.2375	-0.12158	0.21866	-0.29013	-58.519	16.003	14.197	0.15674	-0.080566	0.0053711	45.6492	36.2429	485.77	-0.6709	0.12988	-0.68799	-35.0251	33.681	8.167	0.42305	-0.16582	-0.010058
1.308	-64.49	32.288	353.5981	-0.12129	0.20713	-0.28154	-32.6692	16.23172	12.211	0.16064	-0.087402	0.0068359	40.90086	40.906	641.19	-0.95264	0.20117	-0.82568	-52.8052	71.802	13.975	0.41875	-0.17871	-0.0038086
1.31	-58.524	50.723	339.8072	-0.12451	0.20313	-0.27979	-36.2394	9.098556	3.101	0.16113	-0.09082	0.0078125	74.5095	50.495	804.1746	-1.0977	0.2334	-0.88867	-51.3394	34.594	58.897	0.40186	-0.17822	-0.0125
1.312	-71.055	35.7834	321.843226	-0.13076	0.19863	-0.27784	-50.968	16.5165	7.7813	0.15381	-0.078613	-0.0048828	36.4183	4.3166	914.167	-1.4253	0.33545	-1.0044	-29.5577	37.248	47.0975	0.38721	-0.17627	-0.02002
1.314	-85.9905	33.0267	313.5344	-0.12724	0.18702	-0.27598	-14.941	25.4817	14.0414	0.15698	-0.077636	-0.0085449	53.474	-11.368	1002.5297	-1.6811	0.47534	-1.1294	-50.917	-1.6087	45.7957	0.37715	-0.16768	-0.02002
1.316	-46.159	16.4504	316.6617	-0.1292	0.17646	-0.26504	-40.4535	13.0166	7.5158	0.15283	-0.07666	-0.015137	37.0513	-36.104	1056.73748	-1.9023	0.62988	-1.2305	-26.0809	13.8395	44.337	0.37178	-0.16113	-0.019629
1.318	-55.172	20.3764	317.3566	-0.13193	0.17344	-0.26826	-34.16237	5.6638	-0.8736	0.15283	-0.07666	-0.027344	4.4052	-87.629	1106.535	-2.0996	0.96094	-1.3711	-6.244	1.2345	25.66726	0.37646	-0.15488	-0.019629
1.32	-65.92	13.8405	301.96	-0.13477	0.16553	-0.27051	-10.6437	2.77739	-7.5561	0.15576	-0.074707	-0.032227	33.681	-85.0698	1157.64	-2.146	1.1616	-1.439	8.368	13.6874	24.684	0.37627	-0.14316	-0.028711
1.322	-71.069	18.3619	290.8303	-0.1376	0.15654	-0.25908	-24.1383	12.5185	4.276	0.146	-0.066406	-0.042969	-9.2917	-98.748	1168.804	-2.207	1.4941	-1.6133	-17.747	11.60146	14.5025	0.37646	-0.12891	-0.036133
1.324	-51.69	24.1657	283.3969	-0.14073	0.14423	-0.25214	-14.66	13.762	23.299	0.14038	-0.058838	-0.056885	-27.6795	-100.037	1212.1881	-2.1416	1.6348	-1.7325	-12.8924	5.1603	14.9623	0.37862	-0.12851	-0.03457
1.326	-61.168	36.6126	281.4009	-0.14541	0.1415	-0.25059	16.6686	18.9423	17.718	0.13428	-0.055664	-0.06543	19.95	-79.8707	1248.715	-1.9429	1.6743	-1.7925	-15.3821	22.5727	-6.9392	0.37412	-0.12998	-0.033301
1.328	-74.9652	35.533538	279.9959	-0.14913	0.13632	-0.25205	7.7954	9.52187	6.1529	0.1333	-0.047363	-0.083496	-17.783	-109.0001	1265.7	-1.4473	1.4961	-1.6875	30.0692	-13.9866	41.694	0.35537	-0.13506	-0.036816
1.33	-61.097	40.3236	286.7726	-0.1499	0.125	-0.24609	-20.8852	22.1905	3.406	0.13086	-0.038086	-0.095703	11.186	-111.026	1297.869	-1.2012	1.3457	-1.6055	30.0994	20.3605	26.425	0.32714	-0.14346	-0.022461
1.332	-63.8103	43.13153	280.6637	-0.15263	0.12022	-0.24464	37.6578	30.3642	7.9047	0.12891	-0.024414	-0.11572	24.939	-101.141	1310.435	-0.84717	1.1313	-1.5229	-22.7301	-18.5614	47.843	0.28857	-0.15088	-0.025879
1.334	-64.2183	52.4172	271.9453	-0.1534	0.1167	-0.24249	29.8601	27.385	8.9562	0.12524	-0.0063476	-0.12964	-28.564	-98.5964	1352.461	-0.69165	1.0307	-1.5098	4.155	23.4745	17.3719	0.24687	-0.15606	-0.024609
1.336	-81.8628	46.105	278.4666	-0.1546	0.11283	-0.24286	7.689	26.394	2.4547	0.11768	0.0087891	-0.14453	7.634	-11.931	1411.442	-0.5874	0.96729	-1.5112	-14.654	2.666	-16.2927	0.20332	-0.16289	-0.020508
1.338	-72.331	46.759	262.5437	-0.15603	0.1035	-0.23387	23.9407	23.9129	16.9594	0.10303	0.04248	-0.1626	-57.058	11.9	1390.569	-0.48096	0.87305	-1.4863	4.392	45.2119	-14.9975	0.1666	-0.16094	-0.025976
1.34	-55.852	52.995	251.388	-0.15967	0.10156	-0.23926	23.2975	14.839	16.4713	0.092285	0.053223	-0.16797	-85.182	3.80200000000001	1379.06	-0.44189	0.83008	-1.4688	-11.784	28.5962	6.40923	0.13554	-0.16221	-0.030273
1.342	-32.455	60.7872	252.191	-0.15693	0.10124	-0.23561	-19.63783	20.93274	24.2414	0.074707	0.082031	-0.18604	-30.371	-24.157	1340.515	-0.38672	0.75781	-1.4375	-19.354	51.4587	17.174	0.11084	-0.16211	-0.039551
1.344	-51.234	41.4845	258.905	-0.15229	0.09587	-0.24328	4.0824	22.8459	15.5743	0.055664	0.10034	-0.19849	-88.834	-128.7141	1341.962	-0.39209	0.71875	-1.4473	-15.768	27.0322	16.623	0.088965	-0.15879	-0.050586
1.346	-40.833	30.652	270.4437	-0.14999	0.095934	-0.23541	7.6022	26.0821	8.15859	0.039063	0.11768	-0.21289	-97.77	-142.806	1413.296	-0.40283	0.69971	-1.4409	-22.916	10.024	9.04	0.071973	-0.15391	-0.063477
1.348	-21.269	24.836	266.587	-0.14574	0.094681	-0.23913	-20.49	23.162	8.37016	0.015625	0.13672	-0.23926	-96.0232	-151.077	1457.576	-0.41943	0.67432	-1.437	-39.392	26.092	-3.0474	0.053613	-0.14726	-0.075977
1.35	-53.015	46.7817	264.93161	-0.14209	0.095215	-0.23926	-17.055	33.704	14.3523	0.0029297	0.14551	-0.24512	-83.7028	-198.627	1466.829	-0.44849	0.64868	-1.4353	-51.66494	20.643	23.3735	0.031152	-0.14775	-0.090235
1.352	-43.063	43.7262	278.993	-0.13978	0.089907	-0.24039	-6.0743	21.42652	10.295	-0.025879	0.15771	-0.27148	-26.898	-162.0185	1431.3587	-0.5	0.63086	-1.4395	-47.7993	62.6159	11.541	0.0029297	-0.14258	-0.10254
1.354	-36.449	44.514	279.5314	-0.13765	0.088741	-0.24055	-25.3618	15.3231	22.8067	-0.0625	0.15992	-0.28345	-39.82	-205.656	1406.393	-0.61963	0.62158	-1.4468	-58.9744	20.6407	21.673	-0.029297	-0.14131	-0.12539
1.356	-34.698	52.885	283.9653	-0.14028	0.086157	-0.24649	-27.56113	3.1792	55.098575	-0.11523	0.16406	-0.29932	-40.361	-192.992	1435.083	-0.67578	0.62207	-1.457	-27.8819	51.85	15.987	-0.069141	-0.1332	-0.14424
1.358	-49.541	43.772	287.9231	-0.14125	0.08205	-0.24611	-34.306	-0.122999999999999	77.8304	-0.20361	0.16064	-0.32129	-35.287	-157.419	1467.387	-0.77686	0.65869	-1.5054	-50.3164	18.7671	28.9124	-0.10351	-0.12344	-0.16728
1.36	-57.2202	31.34913	286.8744	-0.14746	0.081543	-0.24854	-47.467	25.6552	108.597	-0.26367	0.1543	-0.34473	-66.8804	-174.95	1519.296	-0.82471	0.7002	-1.5713	-48.4843	53.084	29.6434	-0.13662	-0.10488	-0.19082
1.362	-35.027	28.8811	293.4264	-0.14601	0.082773	-0.25101	-8.7626	46.4066	126.883	-0.39355	0.14404	-0.37305	-9.2647	-108.8036	1534.338	-0.84375	0.76367	-1.6406	-47.04747	44.697	44.375	-0.16504	-0.089844	-0.21826
1.364	-53.845	45.3339	273.4212	-0.15193	0.083085	-0.25421	-7.958	44.45391	174.50709	-0.53296	0.14795	-0.41577	-16.7765	-104.263	1498.75	-0.83594	0.85352	-1.7383	-52.8458	52.932	28.104	-0.18672	-0.066504	-0.24014
1.366	-44.597	48.8593	280.2483	-0.1554	0.083187	-0.26395	-28.9182	48.73655	250.9487	-0.70459	0.15771	-0.4624	-48.09	-128.515	1470.659	-0.82813	0.89648	-1.7813	-38.8616	14.031	25.062	-0.20303	-0.04961	-0.26318
1.368	-55.47	50.254	270.8197	-0.15906	0.086408	-0.26211	6.348	64.9846	380.376	-0.98047	0.15234	-0.50391	-26.593	-77.941	1436.193	-0.81836	0.94336	-1.8652	-15.6689	9.9368	8.403	-0.21396	-0.023828	-0.28428
1.37	-37.981	46.5122	281.1024	-0.15723	0.09082	-0.26709	39.9107	75.9346	540.412	-1.1616	0.1875	-0.55225	-50.3359	-101.855	1427.913	-0.8274	0.96118	-1.9158	-39.846	35.214	-1.0517	-0.21836	-0.0069338	-0.30654
1.372	-56.786	51.8458	291.6173	-0.16375	0.095243	-0.26465	21.2	69.8081	683.325	-1.541	0.25977	-0.64355	5.5362	-63.367	1440.7185	-0.84717	0.97314	-1.9585	-24.112	26.4403	33.809	-0.22217	0.010742	-0.3291
1.374	-60.59	39.9385	301.26228	-0.16428	0.10536	-0.27175	35.461	52.728	811.463	-1.8403	0.35083	-0.73144	82.062	-47.395	1443.382	-0.88623	0.99463	-2.0093	-8.899	48.683	21.8888	-0.22481	0.025781	-0.34873
1.376	-58.7882	42.9933	306.6341	-0.16942	0.10944	-0.27002	70.753	50.26	950.1946	-2.1343	0.44971	-0.8042	37.0892	-92.0821	1454.671	-0.90576	1.0063	-2.0308	-35.2013	-2.813	47.784	-0.23477	0.042285	-0.36817
1.378	-53.791	47.2206	308.559	-0.17394	0.11477	-0.27675	42.1752	53.2859	1062.607	-2.4292	0.66357	-0.90771	63.608	-76.4522	1493.157	-0.94189	1.0493	-2.0601	14.7449	21.59515	32.0009	-0.24765	0.048535	-0.39707
1.38	-76.135	60.6664	305.5269	-0.17969	0.12549	-0.27686	54.142	37.925	1115.762	-2.5352	0.79102	-0.98047	84.478	-112.344	1495.0643	-0.95044	1.0842	-2.0701	35.822	-39.4132	88.012	-0.27822	0.038672	-0.4168
1.382	-84.9431	66.602	294.8434	-0.18331	0.12792	-0.28226	71.342	6.956	1145.651	-2.6265	1.1216	-1.062	47.604	-116.903	1506.27	-0.95557	1.106	-2.0776	13.8142	-12.837	117.615	-0.32861	0.03418	-0.4248
1.384	-64.265	57.94	310.2766	-0.18939	0.13462	-0.28641	66.662	-5.85	1142.437	-2.6863	1.4378	-1.1726	61.525	-62.069	1497.507	-0.95068	1.1313	-2.0679	-13.159	-37.9604	154.027	-0.40362	0.019043	-0.43897
1.386	-67.971	68.3158	300.5044	-0.19331	0.14271	-0.29004	46.391	-11.47	1173.593	-2.6831	1.6802	-1.3394	58.94	-92.308	1490.907	-0.94678	1.1313	-2.064	14.8362	-33.9718	186.2431	-0.50117	-0.005957	-0.46152
1.388	-83.423	74.4115	322.6925	-0.19943	0.1495	-0.2943	41.468	-26.476	1201.349	-2.2871	1.7227	-1.4668	56.357	-53.642	1481.253	-0.92871	1.1172	-2.0488	13.7479	-51.113	213.869	-0.62461	-0.024316	-0.51152
1.39	-68.296	58.4412	333.1358	-0.20264	0.15723	-0.30225	-18.696	-59.63754	1214.2629	-1.9526	1.6099	-1.4233	77.202	-42.934	1467.89	-0.92554	1.0901	-2.0252	48.624	-34.88	353.49	-0.77803	-0.053321	-0.58047
1.392	-57.003	58.255	340.4402	-0.21116	0.16497	-0.29905	-34.78	-62.907	1248.0591	-1.3296	1.2935	-1.271	58.589	-77.06383	1463.955	-0.91553	1.0552	-2.0005	79.532	25.5545	553.767	-0.97461	-0.07666	-0.64258
1.394	-67.202	72.0158	339.261	-0.21976	0.16996	-0.3092	21.756	-72.647	1296.34	-1.0105	1.0647	-1.2136	81.12	-26.3358	1428.8669	-0.90576	0.99072	-1.9702	17.3682	32.7326	798.175	-1.2225	-0.094825	-0.70625
1.396	-61.186	74.9616	342.274	-0.23189	0.17776	-0.31348	39.6763	-66.5487	1287.3116	-0.79248	0.87744	-1.1831	63.756	-52.832	1371.338	-0.89844	0.96484	-1.9531	1.4359	37.8949	1000.009	-1.5211	-0.085938	-0.77344
1.398	-66.691	64.269	362.2994	-0.24388	0.19425	-0.31514	13.286	-48.596	1287.1769	-0.63867	0.72412	-1.1797	38.93	-22.892	1353.904	-0.87988	0.92578	-1.9297	11.5924	-27.1932	1203.113	-1.8778	-0.013672	-0.87149
1.4	-69.758	68.902	366.387	-0.25879	0.2002	-0.31885	-1.55	-16.592	1305.4487	-0.59521	0.67725	-1.1851	75.698	41.3404	1331.5812	-0.86694	0.90893	-1.9128	20.8006	3.559	1380.023	-2.2416	0.052148	-0.95996
1.402	-71.892	76.888	370.0748	-0.26874	0.21591	-0.32538	-74.3696	23.824	1324.2075	-0.58984	0.6582	-1.1953	38.51	10.6915	1311.7118	-0.85693	0.89893	-1.9038	42.99	-25.982	1543.5477	-2.6221	0.18262	-1.0859
1.404	-80.644	71.887	374.6997	-0.27968	0.22626	-0.32753	-98.574	39.633	1358.59263	-0.61792	0.6377	-1.1865	68.837	74.184	1295.3104	-0.82568	0.89307	-1.8804	31.3816	-2.081	1603.4692	-2.9103	0.30381	-1.17
1.406	-83.509	65.6629	403.4382	-0.28672	0.23759	-0.33028	-80.4833	1.54300000000001	1374.424	-0.66064	0.60986	-1.1812	45.68	66.286	1242.152	-0.80518	0.88721	-1.8647	2.027	-71.218	1580.13	-3.1082	0.49063	-1.2388
1.408	-62.256	58.7119	407.3427	-0.28945	0.24765	-0.33008	-92.472	-59.806	1358.436	-0.7417	0.57959	-1.1812	-22.654	31.337	1254.818	-0.75342	0.88135	-1.8335	5.005	-122.9268	1538.69	-3.1992	0.73476	-1.2877
1.41	-73.575	77.4371	398.6664	-0.29541	0.25977	-0.33398	-114.036	-129.169	1345.176	-0.79004	0.57617	-1.1816	13.7967	75.714	1253.287	-0.71167	0.86743	-1.8054	-2.672	-207.722	1549.415	-3.2044	1.0022	-1.3501
1.412	-62.473	71.43002	420.2783	-0.31504	0.27198	-0.34355	-94.663	-159.365	1363.024	-0.896	0.58447	-1.1929	-47.8032	28.0696	1231.387	-0.66357	0.85596	-1.769	-40.2344	-232.11	1543.277	-3.0269	1.1665	-1.4175
1.414	-69.064	71.35925	427.6383	-0.3294	0.28858	-0.35244	-97.439	-137.776	1366.012	-0.9961	0.60498	-1.2148	-32.0821	59.2803	1197.686	-0.60791	0.8335	-1.73	-68.843	-229.32	1537.922	-2.5043	1.1654	-1.4444
1.416	-52.213	74.9545	444.8262	-0.3419	0.29678	-0.34346	-98.522	-123.039	1358.858	-1.0933	0.6333	-1.2358	4.085	74.98	1151.072	-0.57764	0.82861	-1.7104	-30.311	-207.08	1507.029	-1.8115	1.0293	-1.4179
1.418	-78.548	78.6557	450.353	-0.35313	0.31182	-0.34775	-24.4378	-138.441	1381.1595	-1.21	0.66797	-1.2676	-48.136	50.87	1109.627	-0.52979	0.81592	-1.6616	-59.059	-194.76	1432.46	-1.203	0.84805	-1.3961
1.42	-69.545	81.8011	454.3822	-0.37061	0.31982	-0.35693	-37.1153	-163.787	1390.7719	-1.2671	0.69287	-1.2944	-31.7561	90.0951	1120.1675	-0.50635	0.80469	-1.6236	-34.7411	-230.957	1423.043	-0.75537	0.68681	-1.3948
1.422	-84.838	80.8094	465.4958	-0.38379	0.33555	-0.36377	-32.4518	-175.031	1431.17	-1.4136	0.78467	-1.3882	-1.919	82.9348	1123.3497	-0.48682	0.79736	-1.5815	-13.5778	-192.573	1450.6924	-0.48047	0.54199	-1.4043
1.424	-87.935	85.2232	480.8957	-0.40029	0.34785	-0.3665	-1.774	-153.427	1499.2304	-1.4949	0.86548	-1.4602	-13.867	78.91	1106.503	-0.47803	0.77588	-1.521	-34.424	-147.89	1520.715	-0.36836	0.45957	-1.4357
1.426	-95.524	83.6958	492.6674	-0.41553	0.36113	-0.36845	-1.4258	-108	1488.8761	-1.5444	0.91846	-1.5229	28.198	113.41	1068.8248	-0.46973	0.76758	-1.4902	-84.571	-28.24	1572.033	-0.3538	0.38721	-1.4522
1.428	-104.6142	82.0023	499.2536	-0.43145	0.37676	-0.37549	-14.09874	-83.587	1460.769	-1.5469	0.92969	-1.582	16.0829	93.8817	1011.362	-0.45898	0.74414	-1.4277	-103.08779	-39.75	1558.9956	-0.42568	0.33838	-1.4476
1.43	-93.9088	81.3517	500.9216	-0.44287	0.38867	-0.37793	37.94718	-78.169	1436.6543	-1.5449	0.91602	-1.6055	-6.837	136.7502	981.571	-0.45068	0.72608	-1.3789	-89.065	-60.4	1469.956	-0.54599	0.27568	-1.4139
1.432	-87.6812	91.969	507.025	-0.45518	0.40039	-0.379	42.5186	-66.515	1416.03	-1.5625	0.91602	-1.6563	10.974	157.625	967.3051	-0.43701	0.70947	-1.3276	-30.5392	-201.377	1454.615	-0.68262	0.21143	-1.3594
1.434	-88.357	85.9085	534.1568	-0.46748	0.41143	-0.38174	32.2184	-86.585	1439.399	-1.6172	0.95898	-1.7334	-35.5829	138.596	935.8606	-0.41748	0.68652	-1.2598	-3.591	-262.513	1514.84	-0.84043	0.19453	-1.3416
1.436	-90.787	77.8067	538.578	-0.48389	0.42236	-0.38017	84.495	-82.078	1483.5675	-1.6523	0.9834	-1.7646	0.715	168.366	906.3403	-0.40771	0.67822	-1.23	-69.814	-336.63	1589.178	-1.0275	0.23554	-1.3668
1.438	-79.906	78.5953	550.7408	-0.5041	0.43145	-0.38496	66.742	-78.101	1473.2938	-1.7202	1.0454	-1.8159	-24.5913	132.017	880.138	-0.38818	0.6626	-1.1753	-37.8457	-345.071	1597.69	-1.1822	0.32305	-1.4199
1.44	-82.949	74.2297	562.4063	-0.51758	0.4458	-0.38672	98.813	-78.4874	1476.8661	-1.7722	1.091	-1.8488	-23.078	121.4673	853.526	-0.37085	0.64697	-1.1167	-16.5992	-362.915	1551.315	-1.2977	0.42734	-1.4926
1.442	-87.01	71.3693	577.3205	-0.52773	0.44941	-0.39023	127.87	-77.083	1494.451	-1.814	1.1313	-1.8765	17.55	147.345	824.0044	-0.35889	0.63672	-1.0718	19.1277	-360.163	1513.295	-1.3901	0.5083	-1.5532
1.444	-84.832	69.29306	591.8992	-0.54394	0.46308	-0.3875	128.22	-71.512	1501.168	-1.8394	1.1646	-1.9038	-39.183	114.5546	783.722	-0.34229	0.61133	-0.99805	38.6968	-345.929	1554.064	-1.4711	0.60117	-1.6172
1.446	-82.466	74.9234	604.3748	-0.55371	0.47637	-0.39336	116.323	-49.165	1522.622	-1.8218	1.1626	-1.9097	-5.979	134.299	750.856	-0.34033	0.59961	-0.96094	48.2581	-314.26	1659.2701	-1.5897	0.754	-1.7597
1.448	-91.0804	92.1306	602.2465	-0.56494	0.48877	-0.39326	119.494	-25.730065	1529.152	-1.7593	1.1255	-1.8999	-2.965	139.886	717.95666	-0.32666	0.57178	-0.89014	13.9523	-259.003	1706.155	-1.6972	0.85127	-1.8468
1.45	-101.4863	91.6644	612.9218	-0.57422	0.5	-0.39697	85.804	-13.7711	1529.035	-1.6872	1.0725	-1.8777	-29.167	125.4873	676.6477	-0.32178	0.54931	-0.83276	-3.158	-219.454	1746.692	-1.7492	0.90313	-1.8992
1.452	-81.692	89.5155	623.0502	-0.57774	0.50567	-0.39785	44.681	-16.8956	1532.423	-1.6152	1.0117	-1.8516	2.004	154.145	665.78104	-0.31299	0.51758	-0.77344	7.76900000000001	-129.501	1686.367	-1.7539	0.91602	-1.9688
1.454	-77.281	84.8228	636.0327	-0.58701	0.51924	-0.40029	71.111	-18.7329	1534.114	-1.521	0.93408	-1.8159	-34.484	154.019	651.827	-0.31055	0.49414	-0.71191	24.3283	-92.711	1609.18	-1.7093	0.86563	-2.0017
1.456	-63.021	105.39812	640.199	-0.59795	0.53135	-0.40342	42.6696	-22.123	1491.3597	-1.4863	0.89453	-1.8037	-59.9181	153.0873	641.359	-0.30859	0.48438	-0.67627	72.752	-12.204	1574.969	-1.6562	0.82657	-2.0347
1.458	-51.049	105.0433	653.0358	-0.60537	0.5458	-0.40732	53.094	-24.71048	1472.7754	-1.4277	0.83203	-1.7754	-30.0746	162.6209	604.3543	-0.28418	0.45215	-0.59375	30.95155	-3.68600000000001	1545.909	-1.6203	0.83125	-2.0887
1.46	-56.392	100.9989	659.65123	-0.61133	0.55469	-0.40869	67.763	-18.7187	1435.9956	-1.3935	0.78418	-1.7519	-85.205	127.1842	550.2562	-0.27343	0.44239	-0.54102	53.4	-26.678	1566.441	-1.6035	0.8752	-2.1414
1.462	-50.528	103.2236	659.4576	-0.61065	0.56728	-0.41221	29.838	4.5799	1378.476	-1.3652	0.73633	-1.7266	-72.0221	135.4137	510.992	-0.25586	0.4248	-0.48535	65.31	-38.9434	1551.733	-1.6074	0.96289	-2.1973
1.464	-73.615	105.606	667.5836	-0.60967	0.57705	-0.41319	9.165	10.521	1347.211	-1.3354	0.69775	-1.6929	-42.16	144.565	491.015	-0.22559	0.40137	-0.4248	58.6418	-49.904	1590.919	-1.6244	1.0557	-2.2482
1.466	-64.251	111.4004	664.7195	-0.60615	0.58291	-0.41748	20.4373	21.33	1355.993	-1.3193	0.68164	-1.6816	-69.7923	134.7975	472.2294	-0.21436	0.37939	-0.37842	68.6617	-8.6434	1608.306	-1.6616	1.1411	-2.2796
1.468	-61.968	107.5834	676.057	-0.60537	0.59248	-0.42237	16.7246	41.669	1337.5289	-1.2773	0.66992	-1.6563	-39.767	153.381	432.583	-0.18652	0.36084	-0.33203	82.299	-8.883	1617.325	-1.6995	1.1837	-2.2847
1.47	-66.746	118.9099	689.9777	-0.60645	0.60059	-0.42383	1.9	52.51	1319.4155	-1.239	0.67016	-1.6336	-57.01826	125.5978	398.281	-0.15845	0.32959	-0.28027	59.852	17.899	1603.892	-1.6977	1.158	-2.242
1.472	-72.719	119.4012	685.129	-0.60323	0.60771	-0.43008	17.7586	72.314	1294.1691	-1.2021	0.67188	-1.6113	-60.713	109.99	388.56	-0.13574	0.30469	-0.24023	30.4571	-21.348	1573.972	-1.644	1.0669	-2.1909
1.474	-74.67	117.298	683.126	-0.60586	0.6164	-0.44004	-36.843	78.023	1255.2397	-1.1616	0.68213	-1.5796	-25.661	121.529	384.925	-0.10107	0.271	-0.19092	24.743	-20.4806	1583.085	-1.5596	0.93066	-2.1279
1.476	-60.282	135.70765	685.5398	-0.60703	0.62695	-0.4502	-37.604	67.933	1253.374	-1.1465	0.6875	-1.5586	-69.7119	112.547	371.1398	-0.092773	0.25879	-0.17139	23.559	-54.884	1591.377	-1.4572	0.804	-2.0648
1.478	-59.475	146.56406	685.9817	-0.60879	0.63262	-0.45957	-10.5041	55.292	1240.5905	-1.1328	0.68164	-1.5156	-28.793	126.4874	355.454	-0.055664	0.22607	-0.13281	22.8551	-27.444	1586.908	-1.3485	0.71104	-2.021
1.48	-57.616	144.7492	694.9611	-0.60742	0.63672	-0.4707	-8.089	48.044	1206.6764	-1.1287	0.67407	-1.4743	-31.931	131.063	319.7162	-0.022217	0.19531	-0.086914	47.232	-38.2252	1531.01715	-1.2489	0.65107	-1.9774
1.482	-67.842	140.4787	703.5451	-0.61914	0.65351	-0.48067	-0.8914	40.1118	1175.233	-1.1304	0.66748	-1.4351	-48.2059	116.527	295.232	0.0078125	0.17285	-0.060059	54.461	4.772	1436.43	-1.1699	0.62695	-1.9492
1.484	-44.666	144.77855	703.9723	-0.63379	0.66328	-0.49043	10.55768	49.499	1147.234	-1.1245	0.64893	-1.3765	-27.554	130.377	290.5543	0.044434	0.16992	-0.056641	23.4752	11.423	1351	-1.1021	0.61387	-1.9119
1.486	-59.473	148.5286	700.423	-0.64981	0.67187	-0.49902	15.489	78.626	1116.378	-1.1191	0.6416	-1.3477	-42.353	107.00558	285.569	0.07666	0.16137	-0.04126	18.3345	51.99927	1327.667	-1.0589	0.60556	-1.8737
1.488	-73.7251	147.6547	723.9065	-0.66474	0.68603	-0.51113	-2.2997	99.86	1118.6729	-1.0874	0.62939	-1.2886	-6.892	86.663	269.101	0.099609	0.14844	-0.021973	-39.8705	103.226	1338.387	-1.0198	0.59228	-1.8253
1.49	-78.7659	147.0018	714.441	-0.68066	0.69727	-0.5293	65.147	102.555	1095.701	-1.0539	0.61987	-1.2565	12.414	94.09	243.461	0.14209	0.13623	0.0087891	-29.335	120.69	1330.144	-0.98907	0.57715	-1.7691
1.492	-78.6892	154.5258	698.482	-0.69609	0.71387	-0.53359	47.17	108.7305	1052.23	-1.0151	0.61279	-1.2144	-34.7379	79.638	201.56	0.15674	0.125	0.022461	-8.1133	153.562	1238.3186	-0.94727	0.56152	-1.709
1.494	-76.398	166.846	700.3227	-0.71035	0.72461	-0.55449	36.779	119.282	1024.1553	-0.96191	0.5957	-1.167	10.017	98.2406	186.4486	0.19189	0.12012	0.04248	5.7389	152.59	1154.714	-0.90469	0.54844	-1.6539
1.496	-82.3212	170.432	706.0984	-0.71895	0.73477	-0.56621	51.641	139.336	1005.3502	-0.93408	0.58154	-1.1401	0.93	124.651	169.9356	0.21192	0.12134	0.046875	-22.7592	201.055	1080.015	-0.86006	0.5501	-1.6007
1.498	-56.371	167.0957	710.738	-0.72539	0.74317	-0.58691	21.0066	150.137	986.9183	-0.87646	0.54932	-1.0952	-36.6511	114.5851	154.1111	0.22803	0.12354	0.056152	-40.602	165.3984	1090.251	-0.81397	0.55361	-1.5425
1.5	-51.314	161.7649	716.7996	-0.72559	0.74951	-0.61279	3.408	153.447	954.325	-0.83984	0.52539	-1.0503	38.581	116.706	154.9324	0.24609	0.12402	0.060547	-62.5388	206.201	1078.223	-0.7793	0.55859	-1.4808
1.502	-66.8716	174.5532	715.50203	-0.72636	0.74453	-0.62695	-6.548	142.929	910.915	-0.80615	0.50342	-1.0034	-32.5268	95.8395	154.237	0.25195	0.11865	0.069824	-62.539	173.57	1017.5224	-0.75635	0.56299	-1.4097
1.504	-48.324	172.6329	724.6333	-0.72891	0.74297	-0.64297	-10.879	124.5733	858.999	-0.76904	0.47998	-0.94678	-25.758	78.398	169.4167	0.26611	0.12109	0.075195	-1.0152	177.7758	974.255	-0.74395	0.56758	-1.3401
1.506	-50.706	170.1366	720.3721	-0.73789	0.74101	-0.66368	-21.9812	115.759	849.727	-0.74658	0.46924	-0.92236	-12.031	93.4487	145.907	0.26929	0.12183	0.076171	-9.5036	140.493	916.2979	-0.73389	0.5626	-1.2566
1.508	-28.98	171.3229	708.5138	-0.74863	0.73906	-0.67754	1.839	123.386	834.6807	-0.70703	0.44141	-0.85547	-61.6611	88.4602	122.399	0.27637	0.12305	0.081543	-63.991	148.039	888.7863	-0.73545	0.55674	-1.1726
1.51	-73.767	188.21	703.92341	-0.7583	0.729	-0.68604	-35.5692	128.966	783.9278	-0.67041	0.42114	-0.81396	-31.89	95.114	85.69625	0.28711	0.11719	0.093262	-79.8648	194.163	883.18	-0.72676	0.5418	-1.0968
1.512	-50.338	183.887	709.3571	-0.77021	0.72451	-0.69287	-46.71202	124.9803	763.7032	-0.63867	0.3916	-0.76563	-42.964	91.613	66.4412	0.29443	0.11719	0.095215	-94.138	175.51	845.9048	-0.71533	0.52881	-1.0103
1.514	-44.556	185.056	689.3571	-0.78242	0.72051	-0.69023	-33.0899	119.855	726.79835	-0.59326	0.37256	-0.70459	-42.931	71.362	55.2669	0.30469	0.11377	0.10156	-82.8456	198.411	786.4046	-0.68975	0.4999	-0.92569
1.516	-59.802	189.2364	690.8698	-0.79648	0.7252	-0.69649	-46.5697	120.924	698.933	-0.57568	0.36865	-0.68799	-20.944	74.236	66.619	0.31495	0.11573	0.10107	-49.592	161.711	730.402	-0.66553	0.47627	-0.84248
1.518	-73.2392	196.042	686.1415	-0.7999	0.72197	-0.69326	-44.0132	145.5653	704.1548	-0.52832	0.33789	-0.62207	-62.5136	61.5727	63.303	0.32031	0.11377	0.10547	-26.424	196.0439	670.715	-0.63975	0.44658	-0.7667
1.52	-54.943	184.6759	687.048	-0.80029	0.73096	-0.68896	-58.7951	158.8074	666.0779	-0.50122	0.32007	-0.57935	-50.4268	43.93	87.7982	0.3335	0.094727	0.11182	-59.316	221.671	673.1741	-0.61181	0.41709	-0.69033
1.522	-43.674	187.4572	677.2004	-0.79541	0.73643	-0.68994	-62.347	168.992	633.9335	-0.46826	0.30518	-0.53809	-54.538	58.0678	84.6678	0.3374	0.088867	0.11377	-93.273	289.478	632.7245	-0.57861	0.38379	-0.61279
1.524	-52.627	208.86448	652.741	-0.78555	0.73916	-0.6873	-63.69	174.062	618.3827	-0.42139	0.27197	-0.47607	-57.1689	55.573	45.047	0.33643	0.077637	0.10645	-101.027	280.923	588.6015	-0.55166	0.35205	-0.5376
1.526	-51.892	206.1762	660.9959	-0.77148	0.73682	-0.6834	-47.355	162.69	577.3927	-0.39648	0.25488	-0.44727	-9.492	69.594	42.73903	0.33276	0.068847	0.10718	-56.7142	277.176	516.135	-0.52324	0.31836	-0.46738
1.528	-41.529	200.2866	641.9161	-0.74775	0.7335	-0.68174	-74.204	145.61	539.92796	-0.354	0.23877	-0.39697	-46.4262	84.01	24.2952	0.32324	0.059082	0.10059	-33.1354	245.18	480.788	-0.48418	0.28047	-0.3873
1.53	-46.386	189.89209	657.63066	-0.72412	0.71533	-0.6792	-67.6129	128.3824	529.8959	-0.31128	0.20703	-0.34937	-76.403	65.952	39.983	0.3042	0.05127	0.091797	-10.634	227.853	462.655	-0.45586	0.24717	-0.32266
1.532	-58.494	204.4645	646.2529	-0.69638	0.70576	-0.68701	-40.479	125.5002	501.1531	-0.27588	0.19238	-0.31934	-18.022	60.837	60.861	0.29297	0.050293	0.085938	-50.4002	225.377	441.312	-0.43604	0.23389	-0.271
1.534	-75.45	189.58733	646.42	-0.66924	0.68994	-0.69834	-35.0114	129.4919	468.526	-0.23926	0.16602	-0.27734	-60.7945	35.1761	38.3148	0.26904	0.046387	0.084961	-62.540979	192.86	417.075	-0.39619	0.18925	-0.1917
1.536	-58.404	177.5429	654.229	-0.63994	0.67236	-0.70889	-10.947	130.5775	456.549	-0.22119	0.15674	-0.26025	-34.24	12.263	47.785	0.24926	0.053222	0.076416	-47.7392	189.833	321.317	-0.36309	0.16348	-0.12725
1.538	-70.8747	180.158	644.056	-0.61846	0.65322	-0.72978	-10.081	137.56804	405.297	-0.18262	0.13623	-0.22266	-2.086	16.1406	45.3864	0.2417	0.066406	0.069824	-29.745	130.57624	312.0349	-0.33887	0.14004	-0.081544
1.54	-78.087	193.6349	650.912	-0.60693	0.63721	-0.75049	-7.8317	138.1518	397.7223	-0.16504	0.11157	-0.18872	-25.166	14.026	24.123	0.22559	0.088379	0.061523	-31.407	141.133	304.374	-0.30557	0.10976	-0.027442
1.542	-73.335643	194.8098	662.873	-0.61006	0.62461	-0.77998	13.9937	147.7929	422.5199	-0.13379	0.081055	-0.14795	5.329	35.501	19.05241	0.22314	0.099121	0.051758	-29.13	118.081	304.0268	-0.28418	0.10449	0.0014648
1.544	-66.203	201.2148	683.82	-0.63389	0.61573	-0.81123	24.1667	141.58519	394.2798	-0.1123	0.07373	-0.13965	-11.341	55.351	-1.793	0.22119	0.11963	0.041504	-23.672	135.162	295.9616	-0.25557	0.059863	0.059472
1.546	-52.956	210.626	701.34	-0.67021	0.60596	-0.8335	-0.1151	117.93919	395.07	-0.098633	0.064941	-0.12988	-20.1494	26.69	10.968	0.22437	0.13282	0.032714	-38.874	113.034	249.3007	-0.22881	0.044824	0.092774
1.548	-49.122	217.697	748.92	-0.7123	0.59785	-0.85879	25.7427	104.75978	397.228	-0.071777	0.045898	-0.092773	4.151	20.1732	35.9	0.23193	0.1416	0.027832	-19.2214	107.483	209.218	-0.22139	0.040137	0.10723
1.55	-35.113	222.089	796.36	-0.75977	0.59375	-0.88477	27.5531	97.708	343.625	-0.047608	0.030029	-0.05542	-14.027	2.783	30.4806	0.24854	0.15625	0.02832	-5.7249	92.093	177.617	-0.20225	0.022852	0.13008
1.552	-46.369	226.106	845.28	-0.8124	0.59854	-0.91064	9.746	101.4543	331.5673	-0.032715	0.036133	-0.056152	3.435	3.865	42.9212	0.25195	0.15918	0.031738	-22.489	80.925	166.548	-0.17383	0.0068359	0.16357
1.554	-44.953	236.592	883.65	-0.85771	0.60517	-0.946	32.0293	112.8951	316.1412	-0.016602	0.033203	-0.053223	-3.094	31.6894	40.2289	0.26123	0.16504	0.038574	6.373	96.275	137.8657	-0.17744	0.016016	0.15752
1.556	-85.178	246.705	936.55	-0.9124	0.61299	-0.99131	5.3563	104.7194	254.688	-0.0014648	0.025879	-0.036133	-34.2746	27.936	23.4715	0.26709	0.15967	0.046875	-9.419	88.4286	109.0901	-0.17099	0.012695	0.16738
1.558	-73.1005	239.439	1016.81	-0.97178	0.62275	-1.0382	0.4706	93.1272	249.617	0.019531	0.027344	-0.020508	-4.578	37.5221	20.8811	0.27393	0.15137	0.05127	-9.5916	125.94	77.3205	-0.15107	0.0048828	0.18848
1.56	-74.145	224.467	1065.92	-1.0347	0.63135	-1.0874	6.5344	86.8957	265.5457	0.034424	0.027099	-0.01001	-25.823	34.9809	-15.52919	0.28418	0.13916	0.060059	-26.8028	78.219	44.5529	-0.14307	0.018848	0.20176
1.562	-95.581	196.491	1117.54	-1.1107	0.64883	-1.1404	-18.371	80.428	244.7674	0.047363	0.033203	-0.013672	-4.731	16.2763	-8.4045	0.2876	0.13037	0.057129	-17.0735	95.1723	29.124	-0.1377	0.034668	0.19678
1.564	-97.121	163.324	1167.9	-1.1967	0.6708	-1.1807	-28.423	77.484	246.3485	0.053711	0.036621	-0.0053711	-15.942	34.232	15.6831	0.29492	0.11914	0.071777	-47.7169	65.973	39.793	-0.12852	0.058203	0.20645
1.566	-86.581	118.758	1221.92	-1.2855	0.7001	-1.2038	-23.049	81.4976	229.5707	0.062988	0.036133	-0.0014648	-70.0485	25.7416	18.7213	0.29712	0.11279	0.069824	-41.2986	78.0856	13.724	-0.1209	0.083106	0.21025
1.568	-67.7457	86.48	1262.16	-1.3706	0.73701	-1.2266	-46.3464	99.6774	195.3834	0.068848	0.041992	0.0024414	-9.477	21.136	30.06615	0.29492	0.10645	0.069824	-9.108	61.653	19.227	-0.11152	0.11006	0.21494
1.57	-77.9645	53.68	1267.85	-1.4336	0.77441	-1.2441	-47.353	109.447	188.567	0.064453	0.044434	0.00097656	-43.7993	32.4248	18.365	0.30908	0.10547	0.064453	-34.59474	48.7573	8.139	-0.097754	0.14063	0.22392
1.572	-68.413	14.19	1272.07	-1.4525	0.81719	-1.2492	-32.9523	98.677	202.0398	0.066895	0.049805	0.0068359	-71.851	11.73	24.1877	0.31494	0.11133	0.060059	-11.4064	46.674	36.423	-0.079102	0.1665	0.23047
1.574	-73.449	-24.02	1265.35	-1.4225	0.85322	-1.2424	-59.471	85.3577	169.5426	0.060547	0.053223	0.0073242	-21.525	27.0227	34.9036	0.32959	0.12012	0.043945	-49.33418	56.16	66.403	-0.060547	0.18828	0.2335
1.576	-83.8501	-50.89	1249.21	-1.3382	0.8751	-1.2284	-52.103	63.7593	153.442	0.054444	0.060303	0.0039063	-60.2128	39.64	13.411	0.33618	0.12524	0.026367	-48.26	59.404	65.905	-0.041993	0.2127	0.23975
1.578	-80.32021	-57.06	1232.4	-1.2192	0.88203	-1.2045	-42.4056	57.9388	161.6211	0.052734	0.062988	0.010254	-43.4082	34.1094	9.1698	0.34375	0.13379	0.0097656	-30.6519	37.48	31.341	-0.020117	0.22442	0.24873
1.58	-82.7016	-76.45	1228.28	-1.0645	0.86719	-1.1826	-49.7651	49.157	122.642	0.049316	0.072266	0.010742	-27.212	49.213	17.8282	0.35938	0.14746	-0.021973	-9.6073	42.2689	10.371	0.0018553	0.23535	0.25957
1.582	-86.7125	-97.34	1185.81	-0.88867	0.83144	-1.16	-57.7519	44.195	120.038	0.04834	0.071777	0.0097656	-64.8051	16.4819	11.373	0.35693	0.1499	-0.035156	-32.503	18.6352	14.625	0.026855	0.24268	0.27734
1.584	-89.2338	-92.31	1135.75	-0.70537	0.77861	-1.1402	-46.918	41.5159	113.0108	0.057129	0.074219	0.015137	-28.335	2.787	24.6727	0.3623	0.16748	-0.06543	-55.5729	30.1845	24.823	0.050488	0.24551	0.29307
1.586	-104.1627	-72.38	1089.01	-0.52959	0.71299	-1.1277	-31.0428	44.3207	79.926	0.063965	0.080811	0.016601	-25.307	29.2489	30.428	0.35913	0.18408	-0.087891	-48.0103	-0.801100000000001	42.26	0.077832	0.24648	0.31026
1.588	-82.572	-53.03	1065.04	-0.37559	0.64873	-1.1228	-43.9823	60.1198	91.0551	0.078125	0.080566	0.013672	-40.3783	19.775	26.6936	0.35498	0.19873	-0.11523	-40.7143	10.0514	7.233	0.11221	0.24297	0.33252
1.59	-63.795	-31.83	1031.66	-0.24609	0.58936	-1.1211	3.019	69.581	93.858	0.086426	0.080566	0.010254	-13.137	48.396	34.4835	0.34277	0.22656	-0.14551	-7.5561	12.8429	9.7983	0.15439	0.23994	0.35469
1.592	-63.249	-24.74	998.54	-0.14619	0.54775	-1.119	-3.685	72.292	64.812	0.091309	0.07959	0.012207	-44.8603	47.847	29.0728	0.3335	0.24219	-0.16211	22.2258	54.981	28.4961	0.20313	0.24023	0.36621
1.594	-55.46	-18.43	994.2	-0.063183	0.50909	-1.1138	-19.668	73.608	79.4731	0.097168	0.071289	0.019043	-11.542	28.277	27.984062	0.31348	0.27148	-0.18848	-15.8724	63.726	45.624	0.25879	0.23388	0.38301
1.596	-18.076	-33.67	992.51	0.00166	0.48135	-1.1184	16.5935	69.726	91.5744	0.10327	0.060059	0.021729	-4.691	46.213	9.491	0.30249	0.29785	-0.21314	-32.525	57.111	55.919	0.32011	0.21143	0.40156
1.598	-11.66	-50.06	978.5	0.060157	0.46045	-1.1238	-0.387	53.6338	54.9752	0.10303	0.049316	0.033691	-26.675	31.8872	0.997	0.29102	0.32178	-0.23535	-36.7222	40.9433	53.442	0.37793	0.18174	0.42305
1.6	-21.375	-71.41	970.14	0.10791	0.43994	-1.1284	7.268	45.3635	56.16875	0.093262	0.04248	0.038574	6.031	20.629	32.8503	0.27002	0.34912	-0.27051	-11.803	9.6154	20.8468	0.41367	0.16016	0.41309
1.602	-3.73899999999999	-103.439	968.016	0.14668	0.43194	-1.1423	21.5896	45.8	36.2512	0.085449	0.037109	0.029297	-18.31	45.104	28.336	0.26514	0.36572	-0.27881	12.574	13.7828	4.439033	0.4458	0.12207	0.41406
1.604	-6.081	-125.099	943.598	0.17764	0.43379	-1.162	12.244	42.312	15.18511	0.072754	0.031738	0.033691	-15.839	13.9952	35.9441	0.24121	0.3877	-0.29736	1.1	-12.7762	3.2574	0.47637	0.073731	0.42822
1.606	-11.494	-139.967	933.678	0.18936	0.44551	-1.1839	2.706	47.283	15.326	0.057129	0.02539	0.031982	7.403	38.914	35.9039	0.22827	0.43457	-0.32593	-32.884	0.6683	5.0509	0.48164	0.044141	0.4166
1.608	-14.524	-174.4	925.956	0.1874	0.45801	-1.2145	22.5887	39.907	15.2756	0.044434	0.025879	0.024902	-11.4	34.375	17.99967	0.2124	0.479	-0.36768	-44.0608	-23.647	14.165	0.47305	0.010938	0.40332
1.61	-3.59699999999999	-199.778	953.271	0.16846	0.4834	-1.248	8.54	25.8832	-5.1511	0.050293	0.015625	0.032715	-1.797	2.497	28.236	0.19189	0.52783	-0.42383	-15.1597	-1.5182	9.697	0.46211	-0.0040038	0.38653
1.612	18.925	-222.475	953.999	0.129	0.51748	-1.2927	13.5368	22.825	29.3057	0.047363	0.01123	0.032227	-14.121	46.217	17.1742	0.17773	0.5376	-0.44873	11.5996	-8.844	4.598	0.45947	-0.018066	0.37744
1.614	10.519	-214.554	947.16	0.066504	0.56572	-1.3327	9.2072	24.2545	48.2589	0.04541	0.0097656	0.033691	-37.716	34.168	31.602	0.1416	0.5625	-0.47852	15.997	12.5236	23.03706	0.44404	-0.020996	0.3582
1.616	19.101	-186.417	933.93	-0.0081058	0.6208	-1.3722	-8.082	21.408	36.4484	0.05127	0.01709	0.033691	-3.284	50.5934	80.8769	0.099122	0.57276	-0.50586	-1.236	15.556	52.342	0.43731	-0.022754	0.33916
1.618	22.564	-149.611	934.175	-0.083303	0.67392	-1.4091	-14.505	27.8232	40.3155	0.06543	0.028809	0.029297	-47.668	76.827	123.9045	0.041016	0.5625	-0.5415	-45.099	15.6595	33.651	0.42949	-0.005957	0.3126
1.62	51.022	-107.53	929.669	-0.15137	0.73047	-1.4414	-29.2892	33.458	27.279	0.081543	0.044922	0.028809	-54.742	39.479	176.5144	-0.066406	0.53906	-0.62695	-24.0536	33.882	11.003	0.41719	0.015527	0.27803
1.622	38.896	-76.455	931.097	-0.21592	0.7792	-1.471	-42.3219	28.6214	1.5935	0.088379	0.055176	0.024902	-24.454	97.509	253.7616	-0.12988	0.54297	-0.69141	-23.056	14.006	-13.32359	0.4043	0.039551	0.25
1.624	34.439	-65.841	937.012	-0.25967	0.82471	-1.4944	-49.4719	40.745	4.2146	0.104	0.057129	0.022949	-93.349357	132.4751	383.504	-0.3042	0.52002	-0.78076	-20.1064	33.992	-22.9035	0.39258	0.064355	0.22129
1.626	37.67	-64.338	964.209	-0.29209	0.85596	-1.5116	-7.766	28.39208	-5.3673	0.12647	0.05542	0.034912	-110.837	125.2423	562.952	-0.56201	0.54834	-0.90967	-49.1091	17.8831	2.7019	0.37519	0.087207	0.1961
1.628	22.265	-59.144	966.409	-0.31162	0.87549	-1.5245	-53.07	9.957	-7.0293	0.1499	0.048828	0.041504	-109.394	130.105	707.453	-0.71826	0.56787	-0.97119	-48.6136	50.611	12.651	0.35723	0.11416	0.16914
1.63	28.35	-55.233	971.73	-0.31836	0.88672	-1.5254	-70.043	7.4189	17.8651	0.16357	0.029785	0.056641	-104.714	59.965	815.487	-1.0566	0.62695	-1.0645	-59.297	49.262	6.289	0.33906	0.13877	0.14941
1.632	-8.012	-54.409	983.754	-0.31611	0.88496	-1.5291	-35.2656	11.248	33.9517	0.16846	0.026367	0.057129	-84.531	45.1574	976.20869	-1.3265	0.72583	-1.1424	-32.987	78.823	-11.013	0.31641	0.16455	0.12695
1.634	3.258	-68.272	968.656	-0.30879	0.87539	-1.5222	-39.6452	26.674	2.5951	0.18115	0.025879	0.060059	-113.0313	66.362	1111.129	-1.5542	0.8501	-1.2163	-30.4498	53.4467	17.806	0.29189	0.18418	0.1043
1.636	-12.127	-92.144	968.738	-0.30332	0.85508	-1.5137	-28.4862	31.5036	24.9091	0.19336	0.024903	0.064453	-147.6732	31.0016	1234.746	-1.709	1.0596	-1.293	-32.149	51.5518	10.166	0.26123	0.20078	0.079688
1.638	-2.547	-110.417	948.464	-0.30127	0.83652	-1.5057	-33.44487	24.8716	21.771	0.20361	0.027832	0.066895	-150.6256	57.62159	1281.0897	-1.73	1.1714	-1.3179	-14.299	18.2834	39.055	0.23037	0.21796	0.059375
1.64	4.78400000000001	-123.846	984.487	-0.30615	0.81689	-1.4878	-36.5267	31.5562	5.1045	0.21875	0.032715	0.064453	-130.9645	11.368	1281.104	-1.6743	1.3608	-1.3726	-40.6209	15.30671443	51.11	0.20449	0.23447	0.040234
1.642	18.243	-111.906	994.712	-0.31465	0.78633	-1.474	-29.8753	38.3276	20.60793	0.2207	0.034668	0.059082	-83.2718	-76.223	1295.35	-1.5313	1.4522	-1.416	-30.403	25.1551	23.322	0.17139	0.25537	0.027344
1.644	15.294	-113.809	971.347	-0.32197	0.76348	-1.4448	6.9195	26.2027	15.2765	0.23682	0.033691	0.058594	-119.075	-58.9459	1289.293	-1.3125	1.5137	-1.4277	-5.864	24.131	30.04482	0.14482	0.2707	0.011231
1.646	-4.994	-98.567	933.413	-0.32666	0.74668	-1.4256	-21.1086	15.8059	19.1661	0.24341	0.03711	0.050537	-126.207	-88.6316	1298.196	-0.9668	1.4688	-1.3594	-4.5806	49.212	27.703	0.12715	0.29697	-0.0026367
1.648	16.084	-90.089	936.134	-0.32295	0.73321	-1.3988	-19.73291	13.1716	44.41658	0.24609	0.041504	0.042969	-85.353	-70.6616	1295.999	-0.81006	1.3911	-1.2905	-40.126	21.41662	27.5281	0.11973	0.31494	-0.018652
1.65	15.216	-64.318	927.284	-0.31445	0.71924	-1.3765	19.1492	6.3808	34.3318	0.25049	0.058105	0.030762	-102.8581	-66.2522	1277.1379	-0.625	1.209	-1.1719	-31.6256	26.1854	36.7993	0.11924	0.32822	-0.028613
1.652	18.693	-42.188	903.612	-0.29082	0.70869	-1.3531	10.506	10.661	-3.554	0.25	0.063477	0.021973	-18.447	-128.827	1283.9928	-0.6045	1.1128	-1.1314	-31.974	-1.783	35.2167	0.11914	0.3457	-0.040039
1.654	10.375	-29.181	872.358	-0.26924	0.69854	-1.3312	18.8398	14.9762	26.50263	0.24414	0.087402	0.0024414	17.145	-119.863	1263.379	-0.63135	1.0366	-1.105	-6.3206	27.206	30.3685	0.11396	0.35976	-0.080469
1.656	13.24	-21.056	864.395	-0.24932	0.69111	-1.3073	19.5406	10.68752	23.74	0.24194	0.11109	-0.019043	-45.016	-140.0228	1257.998	-0.71729	0.94189	-1.0884	19.324	16.2566	29.927	0.10693	0.37227	-0.10791
1.658	11.662	-10.697	848.386	-0.23291	0.68467	-1.2802	12.695	13.15664	5.7998	0.23926	0.1333	-0.040527	-30.486	-118.601	1318.614	-0.78125	0.91016	-1.0762	-13.525	21.747	25.093	0.096778	0.38086	-0.13565
1.66	29.176	-11.14	818.665	-0.2251	0.68262	-1.2598	17.54792	18.4108	7.8649	0.23828	0.16797	-0.066406	-83.330793	-55.67	1328.97	-0.93408	0.89795	-1.0786	-19.276	11.4378	36.702	0.074316	0.40566	-0.17364
1.662	38.145	-15.535	791.908	-0.21875	0.67197	-1.2349	29.3717	7.4567	-1.877	0.24268	0.18359	-0.078125	-80.3944	-114.993	1327.72547	-1.0425	0.9126	-1.1177	-19.756	9.3778	19.793	0.05127	0.41406	-0.19678
1.664	34.576	-22.255	777.149	-0.22304	0.66914	-1.2129	7.893	1.4704	10.077	0.25146	0.21875	-0.099121	-3.413	-145.43	1310.265	-1.1187	0.93213	-1.1499	14.1307	24.0033	19.6888	0.027051	0.41884	-0.21504
1.666	36.49	-28.606	772.08	-0.21797	0.66289	-1.1816	-11.0757	10.56356	36.9831	0.25366	0.24365	-0.11768	-44.959	-208.228	1294.923	-1.1621	0.95605	-1.2051	10.0834	3.9074	10.4968	0.0030273	0.42002	-0.22373
1.668	32.839	-29.824	752.379	-0.21514	0.65674	-1.1519	13.5448	22.9419	28.3696	0.25195	0.27148	-0.13525	-35.359	-270.9058	1368.413	-1.1875	0.95703	-1.2402	-10.0125	35.33	22.1065	-0.016894	0.44463	-0.25303
1.67	34.281	-33.247	749.962	-0.21289	0.64551	-1.1279	-13.2041	32.1188	-2.3	0.24316	0.30273	-0.17236	-28.734	-238.908592	1426.0484	-1.2007	0.99658	-1.2983	-36.6394	-3.796	10.234	-0.038281	0.47744	-0.2915
1.672	40.137	-39.351	753.613	-0.21035	0.6333	-1.0968	-15.277	22.6418	20.8425608	0.23145	0.31494	-0.18799	-40.1757	-268.981	1438.5435	-1.2149	1.0284	-1.3369	-25.058	2.557	-4.251	-0.044922	0.49609	-0.30176
1.674	38.664	-35.336	743.676	-0.20664	0.61884	-1.0687	-16.4989	10.8884	11.1385	0.20752	0.33887	-0.22754	28.1975	-276.212	1406.3456	-1.2104	1.0513	-1.3706	-30.69	-11.585	-1.018	-0.046582	0.51797	-0.31719
1.676	22.534	-36.746	720.036	-0.20156	0.60166	-1.0413	-43.4629	7.458	-5.1209	0.17896	0.3523	-0.25073	46.986	-270.161	1405.063	-1.2246	1.0684	-1.4023	-31.6084	9.684	1.0278	-0.045313	0.54512	-0.3375
1.678	15.853	-25.192	718.519	-0.19805	0.58525	-1.009	-27.591	23.781	12.7441	0.14307	0.36035	-0.27393	13.968	-308.427	1471.463	-1.2358	1.0864	-1.4155	-3.424	11.873	12.9277	-0.047656	0.56621	-0.35938
1.68	29.413	-16.891	710.422	-0.18945	0.56543	-0.97656	-14.7492	-7.27112	21.211	0.075684	0.37695	-0.31055	9.491	-238.835	1555.854	-1.2705	1.1543	-1.4414	-38.87877	43.6151	21.7208	-0.050195	0.59082	-0.36162
1.682	7.97300000000001	-9.948	680.155	-0.18487	0.54805	-0.94942	-61.001	-34.6449	44.776	0.042969	0.37598	-0.32715	-62.728	-211.3609	1619.434	-1.3045	1.1995	-1.4734	-56.328	34.2435	39.7069	-0.051758	0.61816	-0.37109
1.684	13.093	1.962	641.74	-0.17382	0.53457	-0.91992	-49.545	-28.7834	94.46	-0.043457	0.3877	-0.38086	-74.7168	-190.4805	1644.437	-1.3203	1.2676	-1.5	-45.063	27.9955	10.203	-0.055176	0.64814	-0.38369
1.686	-7.233	7.377	621.699	-0.16406	0.51973	-0.88984	-21.94	-12.5351	106.458	-0.13233	0.42017	-0.45484	-94.136	-135.097	1642.4473	-1.3555	1.3389	-1.5586	-18.8501	36.762	13.566	-0.060449	0.66787	-0.40439
1.688	11.129	17.9	608.685	-0.15742	0.50625	-0.86133	-59.87	10.0858	142.374	-0.23877	0.42334	-0.49951	-112.442	-149.548	1624.28	-1.3589	1.3989	-1.5776	-25.142	32.6786	23.833	-0.052246	0.67724	-0.42314
1.69	-14.171	26.214	594.041	-0.14697	0.48779	-0.83154	-55.7623	24.8004	242.5555	-0.43506	0.43994	-0.55273	-74.522	-91.788	1609.639	-1.3804	1.4966	-1.644	-34.6488	48.0587	56.41	-0.043066	0.68633	-0.45078
1.692	-21.485	24.38	579.162	-0.13525	0.47041	-0.80791	-79.2077	35.728	379.607	-0.56396	0.44873	-0.58838	-97.634	-26.581	1613.072	-1.3843	1.5791	-1.6792	-56.2854	25.7408	111.931	-0.053223	0.69971	-0.48389
1.694	-7.572	21.765	563.716	-0.12402	0.45899	-0.78203	-100.8057	50.0062	520.372	-0.87109	0.51758	-0.69336	-92.4983	-38.391	1643.4755	-1.3901	1.6528	-1.7261	-34.7861	45.565	164.577	-0.076855	0.68887	-0.53828
1.696	-9.227	29.5642	547.254	-0.11348	0.44531	-0.75664	-31.955	41.6829	669.172	-1.1081	0.55688	-0.73364	-63.0062	-22.04	1664.9989	-1.354	1.7388	-1.7612	-63.9309	25.9607	306.71	-0.13194	0.65986	-0.61748
1.698	-18.643	39.1895	516.007	-0.10478	0.42901	-0.73046	-1.791	25.2922	776.1606	-1.3506	0.63477	-0.79492	-97.558	-82.288	1689.5351	-1.3281	1.7813	-1.7715	-54.936	49.224	524.978	-0.22178	0.62744	-0.71475
1.7	-36.086	37.6415	507.414	-0.095215	0.41064	-0.70068	-52.0483	33.4552	897.7119	-1.6401	0.7583	-0.86475	-66.6221	-121.355	1704.55	-1.2617	1.8262	-1.7969	-104.055	54.478	769.735	-0.38359	0.5707	-0.81386
1.702	-0.188000000000002	37.40657	509.069	-0.09248	0.39873	-0.68037	-63.4271	62.163	993.7096	-1.7285	0.82227	-0.87695	-38.299	-92.492	1705.3949	-1.1912	1.8548	-1.7868	-65.29	74.814	1025.945	-0.62305	0.52832	-0.91797
1.704	-11.036	31.4953	487.388	-0.086035	0.39014	-0.6582	-18.54	66.324	1026.7302	-1.8301	0.99512	-0.94434	-99.367	-77.951	1690.81	-1.1245	1.8403	-1.771	-43.662	33.63215	1280.212	-0.96132	0.50606	-1.0119
1.706	-8.57	32.472	473.673	-0.079004	0.38115	-0.63203	-48.474	64.4064	1020.1494	-1.7808	1.1724	-0.99072	-99.5661	-35.453	1682.652	-1.0327	1.7935	-1.7065	-83.5723	2.128	1469.96	-1.3717	0.51368	-1.0992
1.708	-6.413	15.523	453.71	-0.071094	0.3709	-0.60293	-11.0574	15.757	1037.429	-1.7227	1.2813	-1.0176	-107.387	-18.341	1660.411	-1	1.7598	-1.6699	-48.532	-47.986	1629.6224	-1.826	0.57696	-1.1887
1.71	1.832	15.333	457.487	-0.06543	0.36572	-0.58887	18.9388	-29.7062	1039.496	-1.5737	1.4927	-1.1128	-110.444	-71.2433	1672.198	-0.95703	1.6582	-1.5938	-91.13	-99.421	1650.256	-2.2608	0.66016	-1.2478
1.712	4.995	22.0517	446.528	-0.060058	0.35986	-0.56748	-17.4893	-44.8529	1050.543	-1.3955	1.5386	-1.1357	-60.742	-57.193	1684.22	-0.93628	1.5998	-1.5466	-104.7129	-115.318	1644.967	-2.6177	0.78369	-1.2866
1.714	1.35899999999999	21.9757	417.451	-0.053809	0.35459	-0.54483	-28.651	-20.675	1105.635	-1.186	1.481	-1.0894	-77.59	-83.073	1653.666	-0.92139	1.5532	-1.5151	-71.752	-148.375	1608.387	-2.7755	0.97527	-1.2786
1.716	10.212	23.9111	399.999	-0.04873	0.35342	-0.52763	10.9719026	-27.375	1104.3963	-0.96875	1.2891	-0.96875	-42.741	-58.741	1579.0569	-0.89551	1.5137	-1.4834	-42.999	-136.858	1598.22	-2.7426	1.1754	-1.2758
1.718	10.064	23.6154	400.967	-0.044336	0.34707	-0.50224	20.6018	-66.922	1113.4641	-0.92041	1.1997	-0.92627	-58.051	2.1641	1503.113	-0.87695	1.5059	-1.4668	-67.848	-187.685	1591.76	-2.5203	1.3352	-1.2941
1.72	16.212	33.521	392.891	-0.039063	0.34082	-0.49072	48.516	-97.25	1106.1385	-0.92529	1.0454	-0.87744	-93.068	19.477	1458.786	-0.8335	1.4966	-1.4468	-52.258	-211.383	1545.804	-2.1141	1.4091	-1.3103
1.722	4.105	38.456	385.884	-0.036914	0.3376	-0.46866	63.235	-111.693	1102.7003	-0.98608	0.95727	-0.86596	-21.823	42.7645	1445.053	-0.79541	1.4947	-1.4335	-21.8382	-332.66	1449.759	-1.6289	1.4131	-1.3125
1.724	4.981	45.936	376.253	-0.031543	0.3292	-0.44951	-2.5083	-96.392	1172.362	-1.064	0.90381	-0.85889	-22.98	46.952	1443.212	-0.7627	1.4863	-1.4121	19.306	-352.04	1381.2705	-1.2349	1.4202	-1.2904
1.726	-2.218	45.959	355.802	-0.02959	0.3249	-0.44013	-18.46166	-82.089	1259.237	-1.1885	0.87305	-0.86328	3.336	18.433	1419.4351	-0.72852	1.4629	-1.3848	83.67	-323.962	1426.43151	-0.99636	1.3981	-1.2499
1.728	-3.72	54.953	343.947	-0.029199	0.32324	-0.42539	-0.984499999999999	-108.588	1247.293	-1.2432	0.86523	-0.86914	-4.086	43.171	1391.684	-0.71973	1.4512	-1.3652	33.2764	-197.853	1448.375	-0.92334	1.304	-1.219
1.73	5.705	57.334	326.221	-0.02832	0.3208	-0.4082	-0.6368	-153.941	1208.346	-1.3301	0.86719	-0.91016	-70.082	30.402	1348.938	-0.71533	1.4146	-1.3354	-35.6476	-162.84	1474.7591	-0.98086	1.1863	-1.2172
1.732	-11.17	65.924	332.694	-0.025	0.31367	-0.39297	19.3711	-211.8415	1206.972	-1.375	0.88818	-0.96191	-38.33	45.96	1333.218	-0.71264	1.3894	-1.3083	-42.164	-151.02	1440.425	-1.1284	1.0688	-1.1987
1.734	3.628	67.701	328.022	-0.021679	0.31094	-0.37851	8.2127	-245.628	1212.588	-1.4058	0.92432	-1.0269	-63.21	80.896	1298.249	-0.71094	1.3555	-1.2852	-43.39822	-204	1465.63	-1.3456	1.0048	-1.1686
1.736	-16.415	59.691	304.703	-0.018555	0.30312	-0.36875	-29.50751	-255.041	1288.8088	-1.4565	0.96924	-1.1099	-46.025	43.9771	1285.153	-0.70898	1.3105	-1.252	-50.805	-217.945	1508.082	-1.5706	0.96299	-1.1609
1.738	-19.774	55.052	303.916	-0.0088864	0.29912	-0.35674	-32.0345	-247.954	1339.358	-1.4883	0.98242	-1.1367	4.93	40.719	1279.4045	-0.70605	1.2969	-1.2383	-13.8158	-223.558	1546.767	-1.7393	0.9208	-1.1725
1.74	-32.11	36.964	320.586	-0.0043945	0.29736	-0.34521	39.708	-256.833	1328.073	-1.5703	1.001	-1.1855	-33.1126	68.278	1257.408	-0.69385	1.2515	-1.2075	-21.7001	-253.295	1526.667	-1.8302	0.90849	-1.2161
1.742	-24.811	38.207	309.174	1.6e-08	0.29141	-0.33984	72.645	-269.979	1335.106	-1.6543	1.0205	-1.2139	-41.864	61.63	1249.4153	-0.67504	1.218	-1.1843	-33.285	-284.168	1553.093	-1.873	0.93164	-1.2832
1.744	-16.304	49.815	291.12	0.010644	0.28828	-0.32568	72.566	-279.811	1391.561	-1.7358	1.0532	-1.2456	-30.692	114.834	1215.6136	-0.65039	1.1836	-1.1572	27.1265	-364.578	1580.4961	-1.8674	0.96504	-1.3369
1.746	-43.753	53.206	288.769	0.017285	0.28554	-0.31904	61.208	-262.699	1444.048	-1.8257	1.1196	-1.2925	-48.666	102.84	1169.553	-0.59766	1.127	-1.1172	54.406	-383.96	1617.2751	-1.85	0.99843	-1.3805
1.748	-32.515	43.112	276.011	0.025391	0.27998	-0.30781	10.0898	-224.748	1511.2695	-1.8511	1.1606	-1.3062	-22.104	96.098	1144.5243	-0.57373	1.1021	-1.1079	121.604	-415.63	1647.917	-1.8524	1.0125	-1.4102
1.75	-39.175	46.479	272.271	0.032715	0.26953	-0.29443	-5.3748	-188.0869	1543.879	-1.9004	1.2598	-1.3457	-28.957	147.648	1099.4013	-0.53027	1.0552	-1.0786	95.269	-369.914	1710.098	-1.8831	1.013	-1.4233
1.752	-36.225	55.858	268.893	0.04043	0.26416	-0.28506	9.2869	-166.771	1533.238	-1.9333	1.3401	-1.385	-43.5806	141.659	1075.2929	-0.49682	1.0139	-1.0501	54.528	-336.539	1839.165	-1.9507	0.99854	-1.4175
1.754	-32.974	54.316	262.673	0.042774	0.26045	-0.27823	3.5247	-171.539	1532.687	-1.9688	1.4199	-1.4219	-23.5494	184.901	1076.155	-0.4707	0.97266	-1.0244	-23.5733	-247.0348	1899.442	-2.0547	1.0139	-1.4422
1.756	-15.534	50.568	275.263	0.048633	0.25186	-0.27041	2.213	-167.736	1546.124	-2.0156	1.5273	-1.4707	-58.747	205.946	1030.8949	-0.43555	0.93164	-0.99219	-24.4207	-187.025	1914.732	-2.1574	1.0549	-1.4707
1.758	-24.814	56.705	265.038	0.051953	0.25166	-0.26563	1.817	-156.22	1561.085	-2.0347	1.5806	-1.4956	-49.598	141.474	996.0508	-0.41699	0.9082	-0.97363	-57.3486	-118.669	1853.546	-2.2492	1.1053	-1.4891
1.76	-39.695	57.591	258.174	0.054688	0.24023	-0.25732	-19.8281	-140.183	1590.386	-2.0601	1.6606	-1.5366	-21.179	159.833	936.471	-0.3833	0.86182	-0.94092	-82.542	-70.668	1809.5726	-2.3063	1.1675	-1.522
1.762	-17.479	59.718	255.93	0.054101	0.23291	-0.254	-11.7676	-152.0014	1606.8339	-2.0508	1.7002	-1.5576	-24.092	143.5407	883.056	-0.35254	0.81738	-0.91406	-101.4479	-12.15	1809.439	-2.3257	1.2427	-1.5601
1.764	-10.799	56.015	256.228	0.054004	0.22559	-0.2498	25.3657	-173.392	1606.071	-2.0313	1.7266	-1.5723	-2.315	141.63381	871.339	-0.33447	0.79492	-0.88672	-69.042	24.798	1819.4425	-2.3161	1.3321	-1.6042
1.766	-5.709	59.941	254.151	0.052051	0.21699	-0.24707	8.487	-176.804	1631.45	-1.9727	1.7324	-1.5693	-22.4226	197.976	855.3436	-0.30029	0.74365	-0.85693	-25.105	14.261	1821.292	-2.2757	1.4274	-1.6425
1.768	-16.551	58.035	246.807	0.051953	0.20967	-0.24229	32.2587	-150.649	1677.4853	-1.9365	1.7227	-1.5625	-4.3443	143.0696	825.831	-0.27491	0.70825	-0.8269	-1.573	-13.0521	1832.152	-2.2116	1.5102	-1.6706
1.77	-6.11	57.982	253.778	0.04834	0.19922	-0.24268	34.5364	-120.227	1678.867	-1.8481	1.6704	-1.5269	31.752	166.6431	796.001	-0.24756	0.67285	-0.80469	-4.721	-90.31	1817.631	-2.1372	1.5691	-1.6775
1.772	0.948999999999998	56.762	267.664	0.048438	0.20195	-0.24473	-10.3925	-97.4334	1690.198	-1.78	1.6213	-1.4919	7.46873	176.9696	735.11486	-0.21973	0.63477	-0.77539	-30.691	-74.728	1821.8531	-2.0659	1.5942	-1.6655
1.774	5.631	63.399	257.867	0.040918	0.19991	-0.25097	-26.3313	-77.578	1688.479	-1.7246	1.5645	-1.4551	29.804	124.664	713.2579	-0.2041	0.61523	-0.75781	-47.276	-53.822	1835.786	-1.9849	1.5837	-1.6274
1.776	6.241	60.174	265.052	0.039356	0.20147	-0.24863	-22.346794	-81.929	1677.9011	-1.6655	1.5024	-1.4106	32.626	194.694	682.706	-0.16748	0.57666	-0.72412	-106.477	1.89048	1814.142	-1.8952	1.538	-1.5753
1.778	-7.193	63.765	275.888	0.029395	0.20273	-0.25283	-27.29	-88.567	1700.34	-1.6499	1.479	-1.394	2.911	168.9061	632.4622	-0.15161	0.5476	-0.70434	-130.041	-27.3909	1777.319	-1.7956	1.4767	-1.521
1.78	22.407	60.509	289.057	0.019043	0.20361	-0.2583	0.687999999999999	-90.718	1685.9297	-1.6367	1.4414	-1.3672	26.4783	143.2	621.158	-0.13379	0.52588	-0.68701	-133.806	-86.6694	1741.707	-1.6834	1.4193	-1.4569
1.782	6.049	63.217	279.772	0.013672	0.20615	-0.26065	7.296	-73.561	1634.5433	-1.6413	1.4329	-1.344	8.5812	184.138	571.2751	-0.098633	0.48828	-0.65234	-119.821	-110.342	1745.682	-1.5815	1.3599	-1.3989
1.784	5.17899999999999	61.41	280.182	0.0045899	0.20996	-0.26738	-31.099	-53.6873	1579.885	-1.6421	1.4302	-1.3335	15.41827	98.096543	525.51356	-0.086426	0.4668	-0.63281	-118.237	-102.376	1716.089	-1.5068	1.3075	-1.3536
1.786	-6.779	64.257	291.386	-0.0075196	0.21425	-0.27559	-40.436	-38.22	1562.048	-1.6323	1.4263	-1.3198	29.499	149.191	520.1776	-0.059082	0.43408	-0.61279	-59.959	-52.0242	1673.5985	-1.4387	1.2679	-1.3062
1.788	-3.637	71.261	286.674	-0.013672	0.21758	-0.28096	-21.3351	-36.2057	1561.6357	-1.6226	1.4243	-1.3101	-24.313	176.806	473.265	-0.036865	0.40234	-0.58472	-35.6559	-32.194	1610.388	-1.393	1.2183	-1.2761
1.79	-16.096	71.981	284.765	-0.027344	0.229	-0.29541	14.243	-30.682	1576.4406	-1.5874	1.4146	-1.2886	5.063	132.002	456.6638	-0.01709	0.37646	-0.56982	-27.126	25.728	1558.595	-1.3505	1.1788	-1.2497
1.792	-24.244	71.053	287.329	-0.037696	0.23193	-0.29697	38.41574	-14.7872	1548.2612	-1.5496	1.4051	-1.2693	-0.509999999999998	178.3996	418.547	0.011719	0.34863	-0.54883	32.1066	45.61	1517.495	-1.3105	1.1475	-1.2256
1.794	-13.652	68.873	303.682	-0.053027	0.23701	-0.30068	24.8261	-13.5925	1504.853	-1.5117	1.3887	-1.2441	-19.6959	108.79	369.553	0.028809	0.33398	-0.53711	11.516	131.7175	1445.659	-1.2791	1.1131	-1.2025
1.796	-16.915	64.694	304.982	-0.061621	0.24131	-0.30537	-8.3467	4.776	1494.697	-1.4609	1.3594	-1.2168	-24.683	90.991	364.6937	0.058105	0.29932	-0.50537	25.196	180.329	1413.621	-1.2546	1.0786	-1.189
1.798	-27.225	73.535	303.339	-0.075586	0.24648	-0.30967	-19.7765	18.0507	1476.0604	-1.4409	1.3403	-1.1929	-20.605	161.3871	335.3791	0.085205	0.28174	-0.4934	10.951	244.9386	1359.921	-1.2355	1.0493	-1.1714
1.8	-20.695	71.601	314.958	-0.088867	0.25049	-0.31299	-11.8164	12.957	1460.362	-1.3882	1.2925	-1.1597	-28.917	108.8445	339.831	0.10352	0.25732	-0.47412	12.3066	251.65	1320.352	-1.2233	1.0239	-1.1539
1.802	-15.716	75.067	326.778	-0.10517	0.24834	-0.31856	-9.5919	7.381	1448.882	-1.3527	1.258	-1.1262	-35.887	167.262	316.552905	0.12012	0.229	-0.44141	-25.8908	247.94	1278.885	-1.2031	0.99023	-1.1387
1.804	-29.762	72.697	320.248	-0.1207	0.25078	-0.32305	29.2741	4.3162	1411.2678	-1.3179	1.2192	-1.0933	-54.6661	141.866	290.4718	0.12451	0.21875	-0.43262	21.2516	244.281	1277.13	-1.1849	0.95185	-1.1212
1.806	-32.082	71.893	341.677	-0.13672	0.25195	-0.32695	23.9494	2.2245	1354.363	-1.2705	1.1621	-1.0488	-57.6664	74.715	302.432	0.125	0.20459	-0.41064	20.843	236.034	1264.599	-1.1523	0.92343	-1.0952
1.808	-14.102	60.997	345.798	-0.14971	0.24649	-0.33476	1.2898	24.0827	1346.066	-1.2539	1.1309	-1.0283	-53.2062	140.9353	277.2485	0.13134	0.1875	-0.3855	48.446	250.082	1220.004	-1.1027	0.88789	-1.0682
1.81	-28.245	57.844	375.964	-0.1626	0.24561	-0.3374	-7.3823	40.216	1328.7586	-1.2104	1.0806	-0.98584	-48.0519	76.096	246.0668	0.13281	0.17529	-0.36523	67.603	242.202	1169.073	-1.0589	0.85107	-1.047
1.812	-17.247	54.176	369.441	-0.1751	0.24483	-0.34268	11.5424	35.661	1318.008	-1.1834	1.0403	-0.95142	-58.8998	80.044	210.3491	0.13477	0.17139	-0.3457	50.28422	248.659	1126.174	-1.0059	0.81641	-1.0195
1.814	-19.437	61.411	358.354	-0.18623	0.23701	-0.35264	26.4379	34.63	1298.445	-1.1592	0.99805	-0.91992	-64.6759	132.3183	164.701	0.13623	0.16406	-0.34033	63.232	201.3961	1125.9149	-0.95421	0.78682	-0.99307
1.816	-4.676	68.242	378.831	-0.19834	0.23389	-0.36787	38.252	57.1244	1247.83245	-1.123	0.94531	-0.88672	-44.18	47.465	149.071	0.14893	0.16016	-0.30957	48.005	192.187	1108.146	-0.89894	0.75206	-0.96534
1.818	-5.95500000000001	71.727	396.842	-0.20703	0.2333	-0.37275	30.35	81.14	1230.25316	-1.1089	0.92236	-0.87158	-24.788	117.3867	150.405	0.15796	0.15063	-0.29053	59.031	167.455	1072.326	-0.8462	0.71729	-0.92121
1.82	4.828	76.207	381.59	-0.21729	0.2373	-0.38525	-0.81999	124.791	1215.0459	-1.0566	0.86914	-0.82617	-50.9529	83.986	140.156	0.16846	0.14307	-0.27295	33.6502	176.902	995.01	-0.79884	0.69493	-0.89434
1.822	3.404	70.467	405.285	-0.22842	0.23974	-0.39697	-11.9674	155.372	1174.364	-1.0212	0.83228	-0.79907	-8.626	40.779	156.1011	0.18115	0.13037	-0.24951	23.0829	207.234	922.147	-0.75586	0.66504	-0.86133
1.824	-3.003	78.262	424.801	-0.24385	0.24199	-0.4085	-12.0834	135.7109	1132.7074	-0.98584	0.79541	-0.77295	-15.822	116.385	136.748	0.19043	0.12549	-0.23633	-8.7168	229.6614	843.021	-0.70417	0.62293	-0.82
1.826	21.604	79.653	435.348	-0.25635	0.24511	-0.42373	-2.45827	110.4843	1087.978	-0.93115	0.75439	-0.7417	-37.0181	62.772055	107.046	0.19824	0.10596	-0.20605	-9.0032	270.134	816.227	-0.65523	0.59099	-0.78708
1.828	-7.23	72.92	450.856	-0.27051	0.24981	-0.43848	3.4152	93.6882	1048.737	-0.89941	0.72852	-0.7207	-7.999	89.415	86.5493	0.20776	0.10059	-0.19873	-33.0535	273.196	766.911	-0.59583	0.54955	-0.74956
1.83	11.362	73.911	453.678	-0.28174	0.25244	-0.45654	5.9417	96.6038	1024.2509	-0.84131	0.68018	-0.68115	-32.518	117.439	45.513	0.21436	0.087402	-0.18115	-6.7968	279.15	713.792	-0.54058	0.50232	-0.72225
1.832	13.143	73.032	475.21	-0.28838	0.25713	-0.46514	7.6857	121.785	1015.9718	-0.79663	0.64868	-0.66333	-31.882	16.49064	46.48205	0.21387	0.068848	-0.15576	-20.7131	262.949	657.73056	-0.50391	0.47949	-0.70313
1.834	16.749	74.633	467.441	-0.29698	0.26699	-0.48281	16.6041	124.4633	963.1099	-0.75537	0.61572	-0.63135	-3.732	77.8	27.644	0.2168	0.055664	-0.13916	-24.9652	262.558	592.0124	-0.46967	0.47064	-0.67943
1.836	-15.699	78.619	477.721	-0.30283	0.27207	-0.50196	9.2372	93.312	920.2494	-0.70264	0.56689	-0.59717	-16.3549	33.735	31.009	0.21729	0.039063	-0.12549	-20.1376	245.9731	533.59913	-0.43711	0.45429	-0.65191
1.838	0.809999999999995	80.812	489.007	-0.30957	0.28398	-0.51767	7.5324	104.248	872.08	-0.68066	0.54688	-0.58008	-8.359	-4.609	41.022	0.20923	0.01416	-0.10742	-32.6451	237.624	470.708	-0.3797	0.40156	-0.60236
1.84	9.657	69.814	515.548	-0.3125	0.30029	-0.53809	16.8787	120.865	834.787	-0.64551	0.50195	-0.55566	-6.52	67.3959	38.559	0.20996	-0.0048828	-0.087402	3.0655	204.959	408.439	-0.33822	0.35554	-0.58374
1.842	-9.596	69.77	513.969	-0.31992	0.30879	-0.54902	11.1603	148.3368	813.296	-0.61011	0.46973	-0.52636	-25.977	-1.836	36.8225	0.20605	-0.025879	-0.07666	-32.7454	174.561	350.781	-0.29053	0.30029	-0.5542
1.844	-11.246	74.862	537.297	-0.32295	0.32227	-0.56123	20.6391	182.216	794.408	-0.58154	0.43994	-0.51123	-23.864	41.612	10.6331	0.20752	-0.03418	-0.067383	-18.5884	174.843	322.734	-0.23493	0.21878	-0.49184
1.846	-17.021	81.395	549.238	-0.32295	0.33477	-0.57569	24.6098	160.629	768.7188	-0.53955	0.38867	-0.47998	-12.585	75.392	-14.308	0.20996	-0.063477	-0.056152	-31.20041	194.347	307.659	-0.2045	0.15887	-0.45115
1.848	-9.95200000000001	75.637	568.163	-0.32725	0.34346	-0.59033	-0.341899999999999	128.851	704.615	-0.50439	0.36474	-0.46949	-22.38	-10.619	17.6105	0.20971	-0.090821	-0.037109	-12.628	208.738	315.9562	-0.20108	0.12016	-0.43272
1.85	-33.764	78.752	562.857	-0.32568	0.35205	-0.60693	14.0506	123.153	659.0214	-0.47119	0.34521	-0.44482	-33.7545	65.786	34.3441	0.20801	-0.1001	-0.038086	-30.4021	184.8783	275.121	-0.19136	0.08312	-0.40935
1.852	-32.743	86.202	565.938	-0.31738	0.36006	-0.61944	30.0213	124.6767	629.937	-0.42529	0.30762	-0.42725	-31.42	21.8323	46.0194	0.20264	-0.11963	-0.032715	-6.4054	145.758	243.885	-0.18701	0.0625	-0.39063
1.854	-21.652	89.179	578.13	-0.30645	0.36465	-0.63476	12.685	141.1285	615.12	-0.40479	0.29492	-0.41797	-27.653	-4.592	48.644	0.19775	-0.12354	-0.033203	0.966000000000001	133.0474	202.1	-0.17309	0.031401	-0.37642
1.856	-28.559	93.853	584.936	-0.2959	0.37129	-0.64766	10.8477	147.3718	595.735	-0.35645	0.26221	-0.38916	-55.2888	61.72154	23.0367	0.19482	-0.15234	-0.018066	-4.08319	159.383	181.6534	-0.16404	0.0037759	-0.36424
1.858	-24.561	99.785	582.844	-0.28476	0.37851	-0.66211	24.4154	117.7644	524.829	-0.31958	0.23754	-0.37695	-45.794	-20.2695	29.6016	0.18164	-0.1792	-0.0061035	18.4503	180.554	170.7923	-0.13775	-0.013375	-0.3376
1.86	-24.703	91.218	598.673	-0.2749	0.38525	-0.67871	13.0012	95.786	470.592	-0.29004	0.21338	-0.36279	-39.425	40.066	24.0016	0.17236	-0.19141	-0.0024414	8.001	148.849	142.36892	-0.13301	-0.023034	-0.34108
1.862	-33.054	98.201	627.58	-0.26338	0.39092	-0.69307	3.9256	113.51261	463.591	-0.25146	0.18701	-0.3457	-29.222	69.108	-0.9914	0.15381	-0.19092	-0.015137	15.653	118.3206	102.09	-0.11768	-0.060059	-0.32813
1.864	-33.967	94.81	629.664	-0.25684	0.39541	-0.70244	15.0934	120.7026	441.8086	-0.21875	0.15723	-0.31641	-38.7274	-9.1627	19.5091	0.14258	-0.1958	-0.016602	2.288	97.1934	57.26	-0.1027	-0.07781	-0.31623
1.866	-23.081	105.98	626.298	-0.2498	0.39658	-0.71338	-5.008	143.575	431.7516	-0.19141	0.13818	-0.3125	-46.8767	61.653	18.5913	0.12012	-0.19287	-0.024902	29.1377	124.383	51.887	-0.10192	-0.089227	-0.31027
1.868	-21.635	107.815	638.167	-0.24561	0.39522	-0.73125	-2.2029	152.79	406.0831	-0.16699	0.11451	-0.29908	-61.1181	-4.274	20.2589	0.1128	-0.19214	-0.022949	-6.28	139.821	55.986	-0.1084	-0.10757	-0.28619
1.87	-15.249	110.373	659.793	-0.24414	0.39893	-0.74365	0.904	125.783	370.9741	-0.13379	0.085449	-0.27734	-42.013	-21.1291	44.2204	0.10645	-0.18115	-0.024902	0.922000000000001	111.707	72.1265	-0.12188	-0.093843	-0.27781
1.872	5.402	117.406	651.684	-0.24453	0.39668	-0.75567	-11.9411	104.7502	378.8582	-0.095215	0.066406	-0.26709	-31.853	66.9957	22.358	0.11377	-0.1582	-0.040039	-16.791	53.1298	38.487	-0.13867	-0.076172	-0.27002
1.874	-16.13	123.177	641.818	-0.24922	0.39433	-0.77226	-8.8941	109.3328	351.595	-0.087891	0.069336	-0.26709	-32.1104	-10.8017	42.3693	0.125	-0.14941	-0.043945	-22.2211	9.2312	48.534	-0.14456	-0.064369	-0.25515
1.876	-8.637	121.74	654.934	-0.25977	0.39394	-0.78789	1.272	112.1085	303.0106	-0.052246	0.041016	-0.24072	-15.674	51.304	37.607	0.146	-0.13672	-0.047852	-38.9102	-14.154	43.268	-0.15382	-0.051977	-0.24264
1.878	-6.348	119.873	682.826	-0.26279	0.39815	-0.80791	-16.5141	118.252	279.7963	-0.03418	0.035645	-0.23389	-20.7399	57.897	12.7716	0.16577	-0.13184	-0.040527	-35.7369	10.4102	74.93	-0.1605	-0.050735	-0.24003
1.88	15.447	117.967	686.396	-0.27002	0.40527	-0.82422	-32.2718	115.23	239.4647	-0.01416	0.02002	-0.22266	-10.964	-5.95834	8.1022	0.18066	-0.12988	-0.041504	-40.38	20.4652	88.555	-0.1675	-0.044348	-0.22329
1.882	-9.47000000000001	130.075	690.413	-0.28135	0.41543	-0.8499	-12.177	90.4133	222.3785	0.0029297	0.017578	-0.22998	-2.046	68.161	3.32569	0.19775	-0.12646	-0.043945	-82.016	4.0027	61.552	-0.17529	-0.040527	-0.21582
1.884	15.826	139.84	691.685	-0.28887	0.42393	-0.87217	-21.2736	76.143	212.9802	0.018066	0.015625	-0.24268	-7.147	-9.549	14.636	0.20508	-0.12549	-0.04248	-28.70459	-4.78	35.5561	-0.16952	-0.036383	-0.20509
1.886	3.327	131.883	705.655	-0.29941	0.44072	-0.89795	-15.61053	76.1027	206.62581	0.055664	-0.014648	-0.22803	-8.585	-7.417	32.197	0.21533	-0.13037	-0.058105	-37.308	-39.9999	9.5622	-0.15905	-0.038059	-0.19879
1.888	-9.919	144.121	692.031	-0.31367	0.45987	-0.92568	-20.3431	76.0472	203.9953	0.075195	-0.014893	-0.2212	-4.974	66.3119	15.657	0.22632	-0.13452	-0.048584	-6.352	-26.6518	26.6321	-0.13973	-0.036788	-0.18346
1.89	5.194	149.086	695.876	-0.32764	0.47998	-0.94873	-36.1538	87.72783	189.5591	0.080078	-0.0019531	-0.23193	7.451	-22.5779	12.977	0.22803	-0.14453	-0.043945	-32.407	-11.7347	15.295	-0.11837	-0.043767	-0.17604
1.892	-0.107999999999997	153.862	708.68	-0.33897	0.50264	-0.97783	-25.1044	109.014	162.1361	0.091309	-0.025391	-0.19873	-14.322	58.087	15.3754	0.22705	-0.14404	-0.051758	-45.6623	15.2149	24.0848	-0.094727	-0.050781	-0.16699
1.894	2.726	146.819	720.127	-0.35215	0.52657	-1.002	-9.21	100.632	142.9718	0.097168	-0.030762	-0.19092	-22.322	41.573	18.0489	0.22656	-0.14355	-0.057617	-64.427	20.0501	-23.7998	-0.065728	-0.069205	-0.1524
1.896	-14.109	137.129	719.175	-0.3627	0.54726	-1.0266	-14.415	89.279	130.204	0.088379	-0.0087891	-0.20898	-24.868	-4.028833	20.1656	0.2168	-0.14404	-0.062988	-31.537	14.676	-28.736	-0.033294	-0.098185	-0.12957
1.898	-7.792	142.288	721.098	-0.37197	0.56787	-1.0427	-11.122	82.193	135.109	0.095947	0.0036621	-0.219	-17.513	82.147	4.1495	0.21191	-0.1372	-0.070313	-48.5368	12.787	-7.8863	-0.004389	-0.12153	-0.10737
1.9	-6.936	134.757	743.085	-0.38574	0.58545	-1.0542	-2.865	75.8914	115.011	0.104	0.01123	-0.21436	-14.072	6.0135	18.9	0.20557	-0.12402	-0.079102	-60.5227	47.013	8.2854	0.019544	-0.11532	-0.10352
1.902	-18.39	146.268	744.391	-0.39678	0.60869	-1.0667	-24.338	77.099	91.2183	0.1123	0.016113	-0.20703	-22.817	19.1219	37.4741	0.19629	-0.11816	-0.087891	-27.261	69.366	23.49829	0.038574	-0.11426	-0.10791
1.904	-17.13	145.956	737.746	-0.40508	0.625	-1.0729	-2.4673	69.6965	70.603	0.11914	0.021973	-0.20313	-17.927	56.1799	29.676	0.18848	-0.10717	-0.10132	-55.233	78.972	-6.4489	0.071548	-0.11582	-0.094553
1.906	-38.442	146.013	728.878	-0.41133	0.63907	-1.076	-7.289	52.181	67.9662	0.13818	0.025391	-0.19775	-25.0787	-23.8035	24.219	0.17969	-0.098633	-0.1123	-15.4172	71.007	-31.241	0.11176	-0.12471	-0.068865
1.908	-22.492	131.4285	741.083	-0.41328	0.64893	-1.0773	-18.708	46.338	67.832892	0.14502	0.027343	-0.19433	-35.365	73.516	10.032	0.17285	-0.08252	-0.12451	25.63908	10.4994	-24.118	0.16138	-0.12549	-0.057135
1.91	-30.441	138.5818	740.632	-0.41357	0.65283	-1.0776	0.143999999999998	56.0837	41.5252	0.15234	0.030762	-0.18604	-47.502	40.5965	8.2496	0.16895	-0.07959	-0.12646	16.047	3.187	-0.806999999999999	0.21639	-0.1331	-0.038379
1.912	-28.704	143.843	753.235	-0.41446	0.65215	-1.0723	-3.257	51.3847	36.6209	0.16309	0.027344	-0.18018	-47.004	0.8716	34.8661	0.1665	-0.067383	-0.13965	-8.558	3.05	6.585	0.2749	-0.12891	-0.033691
1.914	-26.64	137.9985	741.521	-0.42031	0.64951	-1.0621	-26.7008	56.849	45.1207	0.16797	0.023438	-0.17725	-38.831	88.382	17.3755	0.16553	-0.063232	-0.14405	10.3651	26.953	27.7825	0.32208	-0.13232	-0.027145
1.916	-31.53	140.58	756.329	-0.43125	0.64287	-1.0547	-20.6222	46.503	59.658	0.1792	0.01416	-0.15967	-38.9714	-7.3232	24.83627	0.15967	-0.056152	-0.15039	-32.73608	46.5528	30.137	0.37228	-0.13633	-0.017577
1.918	-10.757	136.262	762.17	-0.4498	0.63164	-1.0482	6.03	34.2413	44.9047	0.18237	0.0048828	-0.14892	-43.5107	26.4855	28.8589	0.15479	-0.049805	-0.15869	11.193	40.8409	35.9453	0.40508	-0.14571	-0.0058549
1.92	-37.686	129.212	759.119	-0.46973	0.61816	-1.0405	-28.743	33.0582	39.0597	0.18164	0.003418	-0.15039	-46.4979	46.6487	24.484	0.15186	-0.04541	-0.16602	26.047	29.883	45.0624	0.43643	-0.15537	0.0025407
1.922	-19.207	119.035	779.727	-0.48594	0.60273	-1.0371	-28.1722	35.9179	7.463	0.18652	-0.017578	-0.13086	-56.1988	-21.5785	33.27	0.14404	-0.044434	-0.17871	-3.353	50.515	54.243	0.4541	-0.1543	0.0029297
1.924	-27.422	112.511	775.556	-0.50381	0.58545	-1.0393	-20.3167	21.708	25.9807	0.18506	-0.022949	-0.1167	-26.378	80.059	16.999	0.14135	-0.036621	-0.19092	-33.3749	45.5154	37.871	0.47158	-0.175	0.0089833
1.926	-4.563	108.531	769.883	-0.52021	0.57217	-1.0347	-24.5784	18.5795	26.85768	0.18604	-0.03125	-0.11035	-22.98	28.569	11.853	0.13428	-0.033203	-0.19971	-15.3214	46.516	59.6329	0.48194	-0.17998	0.017384
1.928	-31.113	96.7	781.67	-0.54365	0.56455	-1.0394	-20.845	10.67112	9.3894	0.18432	-0.037109	-0.10523	-9.155	4.5812	18.56564	0.12256	-0.024902	-0.21826	-16.6182	34.5216	39.526	0.47959	-0.19131	0.01621
1.93	-19.512	79.774	802.85	-0.57227	0.56055	-1.043	-14.8846	8.6548	4.9098	0.18799	-0.045898	-0.092773	-26.3836	74.729	17.7462	0.11475	-0.023438	-0.22656	-25.1789	0.359999999999999	36.8919	0.47383	-0.19864	0.016114
1.932	-4.392	65.743	828.05	-0.59941	0.56367	-1.0461	-34.6097	11.9162	1.114	0.18213	-0.052246	-0.082031	-18.463	-14.1732	16.2812	0.10107	-0.0087891	-0.24756	1.847	19.6159	35.803	0.46143	-0.19678	0.0029297
1.934	-2.728	56.09	844.76	-0.62959	0.56963	-1.0554	-15.9551	16.1199	5.475	0.18115	-0.061035	-0.077637	-4.299	44.8101	13.34658	0.083496	0.0021973	-0.26807	-57.5461	19.9	25.6511	0.44521	-0.19521	0.0027345
1.936	-7.066	61.233	881.02	-0.65186	0.58409	-1.0628	1.377	4.7751	10.502	0.18213	-0.070801	-0.063965	-11.606	53.521	27.87602	0.067871	0.014648	-0.28711	-40.8863	50.764	14.0017	0.4289	-0.19326	0.0062498
1.938	-6.116	91.49	929.17	-0.66865	0.60576	-1.0757	-37.7757	7.5893	14.2217	0.17578	-0.081543	-0.054688	-14.908	-21.1819	59.336	0.023926	0.022949	-0.32031	-71.082	39.492	3.222	0.40547	-0.1831	-0.00078131
1.94	13.676	134.901	975.1	-0.67578	0.625	-1.0908	-6.8232	17.6047	16.7404	0.16992	-0.083496	-0.056641	-14.721	56.508	70.8069	-0.0029297	0.023438	-0.33301	-24.079	21.9288	29.7728	0.38379	-0.16904	-0.0048828
1.942	-11.841	166.0248	1006.05	-0.67695	0.64043	-1.1033	-10.7424	5.1764	35.8552	0.15625	-0.09375	-0.044922	3.298	0.6234	82.0456	-0.075684	0.041016	-0.36084	-32.821	-15.7348	31.2324	0.3667	-0.15967	-0.01123
1.944	7.154	199.726	1047.55	-0.67539	0.65312	-1.1244	-29.2801	12.4745	7.823	0.14795	-0.094727	-0.04541	5.659	20.5963	105.2408	-0.13941	0.046875	-0.38697	-34.5706	-24.5582	60.868	0.34814	-0.14658	-0.018848
1.946	2.17	215.451	1114.63	-0.68243	0.65625	-1.1518	-7.076	16.732	-3.464	0.12891	-0.094238	-0.040039	2.0939	76.48	124.033	-0.2041	0.049316	-0.41699	-44.8034	-31.4296	25.0353	0.33428	-0.13242	-0.026172
1.948	-5.527	235.412	1168.24	-0.70547	0.6584	-1.1775	-18.8704	13.27179	0.8827	0.12109	-0.09375	-0.037109	-7.2706	-10.1483	198.4355	-0.30713	0.042969	-0.48486	-63.692	-24.2873	3.1567	0.31826	-0.12578	-0.030859
1.95	-8.446	245.933	1198.88	-0.74072	0.6626	-1.1968	-22.8549	20.925	3.3156	0.11035	-0.084961	-0.037598	25.5495	79.5798	256.121	-0.36865	0.04834	-0.52295	-33.3863	14.2944	2.17509	0.30781	-0.12119	-0.044629
1.952	-19.811	264.045	1216.53	-0.78584	0.6708	-1.2155	-0.244	16.68181	4.4452	0.10742	-0.07373	-0.041992	46.355	68.3363	373.479	-0.51953	0.05127	-0.61035	-35.81119	11.054	-9.8794	0.29248	-0.11377	-0.055176
1.954	-13.41	262.856	1226.19	-0.8374	0.68701	-1.2298	2.83	12.45444	10.9547	0.10645	-0.070313	-0.039063	-1.522	36.5092	548.0275	-0.68066	0.088132	-0.70556	-7.926	34.45	-8.1343	0.27217	-0.10556	-0.060352
1.956	-41.185	239.827	1196.25	-0.87334	0.71006	-1.2411	-12.243	17.4126	3.6919	0.11865	-0.056152	-0.04248	22.9172	122.904	677.766	-0.85889	0.11865	-0.78467	-23.503	7.993	-5.344	0.24629	-0.099511	-0.071191
1.958	-46.97	192.455	1171.35	-0.89492	0.74258	-1.2516	5.8903	24.3788	-6.519	0.12549	-0.043213	-0.043457	72.63	19.967	795.3652	-1.1558	0.20459	-0.91162	-34.7765	27.538	-5.308	0.21816	-0.099901	-0.084863
1.96	-54.991	136.306	1151.16	-0.89502	0.78564	-1.2534	-5.5694	19.6016	15.9377	0.14014	-0.037109	-0.042969	36.9881	22.1237	893.302	-1.3081	0.27002	-0.98584	-41.518	31.6296	-16.9971	0.18398	-0.097071	-0.09414
1.962	-54.166	94.38	1125.93	-0.87715	0.82598	-1.2467	-21.0969	24.1749	13.21523	0.15039	-0.030762	-0.049316	26.38714	33.65	961.811	-1.6094	0.41504	-1.1094	12.9307	53.5568	16.1847	0.14746	-0.095703	-0.10742
1.964	-72.522	68.081	1088.47	-0.84492	0.85977	-1.2363	-5.775	17.3496	-2.9444	0.15967	-0.027832	-0.045898	9.485	-82.86249	1017.8319	-1.8103	0.5813	-1.2273	15.801	56.9553	13.421	0.12061	-0.091504	-0.12148
1.966	-101.8458	56.174	1021.63	-0.80274	0.88789	-1.216	9.4482	1.3165	17.0175	0.17578	-0.029297	-0.043945	9.6755	-25.569	1039.283	-1.9551	0.76953	-1.3242	-9.904	50.20544	18.9409	0.096387	-0.089063	-0.13662
1.968	-91.834	57.845	975.25	-0.74756	0.91826	-1.1763	-11.9967	16.7162	21.2394	0.17602	-0.035401	-0.044921	-2.115	-62.281	1079.632	-2.0249	1.1216	-1.4565	-14.9616	36.757	8.941	0.081153	-0.08164	-0.15264
1.97	-99.226	55.78	939.6	-0.6875	0.94141	-1.1387	-8.795	23.4222	12.2291	0.17676	-0.035156	-0.046387	-20.7768	-78.2003	1127.063	-2.0078	1.291	-1.5234	-2.8061	38.5121	6.756	0.071289	-0.069629	-0.17422
1.972	-89.358	58.479	924.4	-0.62392	0.95303	-1.0848	8.321	18.4606	8.458	0.17383	-0.036621	-0.053223	-23.5289	-25.8777	1176.4939	-1.9121	1.5645	-1.6367	21.145	70.044	6.81	0.062988	-0.058594	-0.19287
1.974	-106.9192	60.655	913.72	-0.55889	0.95752	-1.0242	-32.0894	27.045	-5.2665	0.17529	-0.040527	-0.051758	-16.553	-101.2152	1242.576	-1.7539	1.602	-1.6753	-8.291	63.028	46.847	0.049707	-0.049414	-0.21114
1.976	-86.641	47.693	920.69	-0.49756	0.96182	-0.96826	-15.8863	30.9408	-4.6186	0.1792	-0.041992	-0.056152	-18.01	-46.429	1259.944	-1.4751	1.4985	-1.6382	-4.936	48.507	41.5393	0.032032	-0.043359	-0.2292
1.978	-86.101	34.876	920.27	-0.44395	0.96269	-0.91543	-7.131	11.081	17.3917	0.18091	-0.039062	-0.066163	-7.732	-69.097	1278.5341	-1.0273	1.2031	-1.5039	-29.7384	3.826	25.446	0.00625	-0.039844	-0.24443
1.98	-97.947	27.778	891.19	-0.40674	0.95557	-0.87549	-30.5074	19.8931	9.0134	0.18604	-0.036133	-0.079102	22.835	-111.767	1286.998	-0.85107	1.0923	-1.4663	-6.1549	7.4748	25.7637	-0.027246	-0.035059	-0.26582
1.982	-113.741	-0.309999999999988	885.6	-0.38028	0.94883	-0.84922	-7.5511	20.195	2.4287	0.18506	-0.026855	-0.091797	-19.207	-7.88500000000001	1302.28	-0.60205	0.96338	-1.4292	-26.1235	-5.9676	38.2522	-0.066406	-0.03418	-0.28564
1.984	-118.407	-31.06	868.8	-0.37246	0.94844	-0.83868	-32.376	12.9827	26.6401	0.18897	-0.018066	-0.096193	-50.599	9.45699999999999	1356.04	-0.49878	0.88599	-1.4197	-6.942	34.2168	63.983	-0.1084	-0.026855	-0.30977
1.986	-109.651	-83.14	860.39	-0.38613	0.95273	-0.83906	-18.8909	29.6299	5.9786	0.19189	-0.012695	-0.10645	-59.528	60.274	1371.4606	-0.41553	0.81104	-1.4155	-46.267079	26.6293	73.801	-0.15166	-0.017383	-0.33574
1.988	-133.212988	-132.632	855.11	-0.429	0.96494	-0.85361	-9.6739	32.049	2.737278	0.19971	-0.0048828	-0.12158	-89.855	90.899	1373.347	-0.34424	0.70654	-1.3921	-30.9888	27.8955	49.516	-0.18838	-0.0021484	-0.35918
1.99	-128.6079	-168.025	868.15	-0.48828	0.98828	-0.875	-18.9921	32.9708	11.9937	0.20215	-0.0019531	-0.12646	-69.1574	-45.618	1371.48	-0.31641	0.66992	-1.3828	-19.632	18.9668	-4.468	-0.21875	0.021484	-0.38594
1.992	-130.8073	-197.185	880.98	-0.55381	1.0164	-0.89219	-26.422	36.0988	-3.9966	0.21094	0.0078125	-0.13721	-85.199	-68.9397	1346.982	-0.31201	0.61768	-1.3657	-32.6684	-2.5067	28.6404	-0.24463	0.04834	-0.40967
1.994	-134.77287	-202.413	878.907	-0.61251	1.0481	-0.90957	-8.2266	26.39211	6.8653	0.21411	0.015137	-0.14721	-112.549	-103.091	1384.977	-0.32519	0.59033	-1.3623	-25.863	26.6863	21.2499	-0.25068	0.081153	-0.43282
1.996	-121.842	-195.6258	882.012	-0.65782	1.0887	-0.93144	-10.6407	10.967	26.4464	0.21094	0.024902	-0.16357	-85.724	-124.964	1387.942	-0.34375	0.57813	-1.3652	-49.4492	15.5641	33.045	-0.2584	0.11074	-0.45908
1.998	-126.179	-186.6528	896.358	-0.68633	1.14	-0.94356	-39.7676	14.5	11.28513	0.20654	0.040039	-0.1748	-78.622	-76.376	1377.1736	-0.38184	0.5957	-1.3672	-39.9182	21.8171	25.6782	-0.26153	0.13692	-0.48486
2	-98.358	-178.144	922.05	-0.69922	1.1992	-0.96094	-6.906	8.35	20.42425	0.20264	0.05127	-0.17676	-17.939	-144.301	1380.388	-0.41455	0.61572	-1.3706	-58.805	-8.12138	-7.846227	-0.26162	0.17236	-0.50596
2.002	-109.313	-168.0463	941.508	-0.69404	1.2446	-0.98388	-9.1194	16.69	21.1848	0.18652	0.061523	-0.19336	-5.241	-142.3673	1364.3	-0.50732	0.65625	-1.3984	-38.1396	-4.5814	-13.8682	-0.25439	0.18799	-0.51025
2.004	-105.458	-141.201	957.083	-0.68428	1.2923	-1.0073	-17.7438	31.1776	1.0233	0.17285	0.071045	-0.20606	-24.389	-133.395	1420.056	-0.58277	0.67969	-1.4209	-48.06281	-0.326000000000001	3.7328	-0.25264	0.18056	-0.52529
2.006	-116.233	-128.454	993.593	-0.66241	1.3321	-1.0386	-11.5666	21.547	28.1422	0.16016	0.086426	-0.2207	-34.7208	-169.136	1458.3954	-0.646	0.71143	-1.4507	-3.685	36.979	21.079	-0.26934	0.17422	-0.55703
2.008	-113.574	-107.199	1001.388	-0.64893	1.3571	-1.0714	-13.4117	11.42448	22.7616	0.14209	0.10889	-0.23438	-66.345	-110.987	1459.962	-0.71826	0.77588	-1.5308	-7.324	14.63858	64.103	-0.28183	0.15196	-0.57852
2.01	-143.1555	-112.489	1001.704	-0.64111	1.3696	-1.103	-13.348	17.6278	3.0296	0.12939	0.12158	-0.24561	-38.01365	-104.818	1434.339	-0.74316	0.81885	-1.5757	-40.024	-0.0649999999999977	107.2517	-0.30381	0.13359	-0.5958
2.012	-150.5712	-102.721	993.4318	-0.63594	1.3652	-1.1136	7.22915	8.635	13.678	0.10986	0.14014	-0.26074	6.0547	-98.03	1366.08174	-0.76123	0.91162	-1.6577	-35.6386	-6.418	113.138	-0.3584	0.11719	-0.61816
2.014	-133.097	-121.541	1025.9739	-0.63672	1.3465	-1.1136	-6.377	7.959	25.0956	0.10279	0.16016	-0.27929	-29.469	-68.581	1328.645	-0.75586	0.96631	-1.7188	47.75	-7.323	215.4698	-0.46328	0.10635	-0.67461
2.016	-144.0508	-138.852	1047.866	-0.6465	1.3211	-1.1047	-23.6233	24.8313	10.544	0.091797	0.17773	-0.30029	-20.185	-106.95	1344.17	-0.73975	1.0083	-1.7749	27.1872	39.8523	303.451	-0.59678	0.090332	-0.73057
2.018	-124.991	-146.76082	1053.912	-0.65791	1.2868	-1.0997	20.5131	22.675632	5.211	0.066895	0.19092	-0.32324	-5.8022	-92.941	1354.868	-0.72266	1.0176	-1.8398	14.99155	47.6442	483.838	-0.76553	0.073144	-0.79619
2.02	-137.3377	-154.276	1061.293	-0.6543	1.2578	-1.0898	-5.5648	20.56496	14.5418	0.050781	0.19678	-0.33301	0.2628	-85.6517	1377.651	-0.71094	1.0234	-1.873	50.379	85.815	662.633	-0.98329	0.036328	-0.83877
2.022	-114.285	-158.187	1071.119	-0.63802	1.2363	-1.0673	-25.83076	19.0032	32.0967	-0.012695	0.20313	-0.34277	88.929	-77.045	1366.2584	-0.7085	1.0298	-1.9253	-11.7402	77.631	882.326	-1.2729	0.026855	-0.90186
2.024	-97.283	-161.373	1071.5482	-0.60745	1.222	-1.05	-7.589	-8.3328	60.989	-0.075681	0.20947	-0.35108	77.18	-43.5271	1350.972	-0.72535	1.0471	-1.9636	60.721	83.088	1083.953	-1.6311	0.048339	-0.98069
2.026	-110.866	-149.011	1060.3865	-0.56803	1.2192	-1.0277	-22.9736	-20.5081	84.4861	-0.15479	0.21484	-0.36328	76.048	-44.6	1353.7	-0.74365	1.0688	-1.9976	39.5199	48.0397	1333.491	-2.0495	0.11553	-1.0971
2.028	-114.215	-135.832	1072.8207	-0.52805	1.2186	-1.0039	-3.513	3.1575	71.929	-0.27393	0.2168	-0.39404	84.609	-39.253	1353.6767	-0.76611	1.1001	-2.0229	38.3229	62.9712	1525.3023	-2.446	0.23584	-1.2085
2.03	-121.637	-134.7724	1075.586	-0.49414	1.2148	-0.97656	6.7825	10.1102	104.547	-0.33984	0.21484	-0.41406	49.344	-52.2722	1401.533	-0.77344	1.1133	-2.0254	10.03485	27.295	1623.6606	-2.8064	0.42832	-1.3178
2.032	-112.5779	-129.3982	1084.817	-0.46408	1.2162	-0.94884	-3.882	9.3663	167.1277	-0.4834	0.17773	-0.42969	70.546	-73.739	1412.434	-0.79004	1.127	-2.0293	49.0044	21.217	1655.1	-3.0508	0.67969	-1.4023
2.034	-151.9835	-128.69	1055.326	-0.43564	1.2053	-0.92447	-2.7279	21.7219	167.126	-0.64502	0.20166	-0.48487	76.4719	-82.42	1399.038	-0.78589	1.1242	-2.0212	23.153	-60.173	1628.769	-3.1767	1.0132	-1.4833
2.036	-146.30209	-111.403	1030.43614	-0.4186	1.1872	-0.90027	13.52144	30.6153	263.4	-0.83936	0.21484	-0.54834	48.0764	-79.488	1392.776	-0.78662	1.1128	-2.0073	40.3136	-148.211	1659.94	-3.2	1.3152	-1.5847
2.038	-143.368	-108.785	1020.164	-0.41354	1.1588	-0.87543	28.2779	67.8108	404.756	-1.1504	0.22168	-0.604	94.527	-54.0825	1341.185	-0.7832	1.0898	-1.9854	21.7445	-194.136	1641.686	-3.0063	1.4559	-1.7035
2.04	-128.742	-91.389	999.415	-0.42285	1.1328	-0.85938	6.7971	92.899	567.626	-1.3237	0.229	-0.62549	75.874	-25.5607	1344.2395	-0.78076	1.0825	-1.9683	-95.1373	-251.38	1619.928	-2.5057	1.4232	-1.7334
2.042	-108.517	-80.679	970.045	-0.44351	1.105	-0.84467	20.7205	89.929	711.326	-1.7134	0.30518	-0.72119	71.553	11.1821	1319.8599	-0.76318	1.0513	-1.9487	-84.746	-221.23	1567.352	-1.793	1.2109	-1.623
2.044	-109.822	-81.46765	955.33	-0.4786	1.0767	-0.83002	23.017	73.5446	816.033	-1.9692	0.36279	-0.78369	79.058	-15.996	1289.55823	-0.73975	1.0103	-1.9253	-64.813	-237.38	1520.04801	-1.1365	0.9865	-1.5268
2.046	-99.793	-73.6528	948.514	-0.51086	1.0536	-0.81289	39.628	80.73	927.289	-2.2007	0.45557	-0.85498	44.2546	-11.0723	1289.575	-0.72998	0.99268	-1.9175	-48.571	-232.863	1498.1405	-0.60185	0.77978	-1.4893
2.048	-107.23	-66.4117	947.462	-0.53589	1.0342	-0.80184	5.3674	58.347	1084.884	-2.3848	0.63428	-0.95508	65.9	-4.764	1275.4552	-0.70654	0.95557	-1.9019	-62.257	-244.0146	1504.194	-0.27685	0.66025	-1.4972
2.05	-91.073	-56.0537	937.161	-0.55273	1.0234	-0.78711	-0.46381	46.0544	1170.8831	-2.4331	0.75635	-0.99561	34.506	-1.84200000000001	1268.994	-0.69677	0.93554	-1.8833	-76.128	-176.988	1538.361	-0.14746	0.65058	-1.5297
2.052	-99.596	-64.0441	949.4014	-0.54254	1.0143	-0.77789	27.789	26.925	1155.88846	-2.4878	1.0679	-1.0757	51.564	74.992	1228.901	-0.68604	0.91211	-1.8672	-150.742	-113.75	1597.342	-0.11377	0.66064	-1.5581
2.054	-87.844	-70.4233	951.051	-0.51601	1.005	-0.76261	62.1717	-32.374	1169.976	-2.4909	1.2688	-1.2063	48.024	91.8664	1175.393	-0.66553	0.89502	-1.8452	-162.806	-38.24	1581.567	-0.16035	0.66211	-1.5715
2.056	-107.724	-82.2855	931.6506	-0.48312	0.99751	-0.74756	27.6382	-58.276	1172.451	-2.334	1.3613	-1.3184	-12.4274	109.3592	1162.457	-0.65186	0.88721	-1.8354	-149.296	-79.98	1516.83	-0.23418	0.62129	-1.55
2.058	-142.98	-92.6659	911.5403	-0.44867	0.98445	-0.74374	-24.7412	-66.545	1195.124	-1.7969	1.2832	-1.3223	11.1885	130.722	1168.13	-0.60791	0.87061	-1.8042	-107.547	-123.26	1479.52	-0.34082	0.5541	-1.5265
2.06	-121.5866	-96.2619	892.44	-0.41455	0.97119	-0.72803	-15.782	-68.77	1243.367	-1.502	1.1914	-1.2832	-22.1453	73.437	1195.242	-0.57031	0.85645	-1.7822	-103.029	-203.8267	1477.189	-0.45196	0.48203	-1.5021
2.062	-130.905	-91.525	877.567	-0.39216	0.95078	-0.7138	-28.238	-60.1022	1252.6174	-1.0464	1.0142	-1.231	-22.4371	86.867	1191.547	-0.52832	0.8457	-1.7656	-88.242	-251.089	1549.722	-0.59375	0.43604	-1.4863
2.064	-105.294	-79.2436	841.3946	-0.36867	0.93045	-0.71088	8.98	-51.1	1275.0755	-0.84716	0.87451	-1.2177	5.694	66.244	1137.697	-0.47119	0.81836	-1.7207	-127.122	-285.984	1558.515	-0.74912	0.44912	-1.4972
2.066	-129.2046	-69.7412	812.311	-0.34632	0.90436	-0.69267	19.3743	-73.15	1314.071	-0.70654	0.76221	-1.2104	-43.6219	49.623	1096.901	-0.44922	0.81055	-1.6992	-69.759	-309.058	1544.441	-0.896	0.4958	-1.5276
2.068	-111.315	-50.891	799.396	-0.3288	0.88213	-0.67264	5.814	-71.212	1301.768	-0.6123	0.68359	-1.2422	-32.3714	91.542	1052.485	-0.41943	0.7915	-1.6499	-20.017	-333.743	1539.3761	-1.0238	0.54346	-1.571
2.07	-103.997	-43.872	788.546	-0.30615	0.854	-0.65967	-18.387	-20.199	1290.712	-0.58203	0.66992	-1.2549	-25.8319	56.447	1041.548	-0.40967	0.77612	-1.6072	-27.738	-337.827	1551.969	-1.1487	0.56592	-1.6097
2.072	-105.411	-28.7183	757.3115	-0.28782	0.83136	-0.64302	-19.839	18.547	1318.852	-0.55029	0.63232	-1.2495	-43.1893	111.236	1046.7719	-0.41016	0.75781	-1.5684	-7.394	-321.957	1604.798	-1.2813	0.60938	-1.666
2.074	-106.224	-22.9853	739.7543	-0.2673	0.80798	-0.62776	-61.5377	44.402	1332.388	-0.55761	0.58911	-1.2508	17.2455	126.6251	1031.05666	-0.40186	0.73682	-1.5034	-16.5595	-286.069	1662.812	-1.4569	0.7167	-1.7771
2.076	-106.99	-1.336	719.2898	-0.24921	0.78675	-0.6163	-67.7812	26.727	1330.6422	-0.58984	0.55078	-1.248	-3.0444	81.735	1033.302	-0.39551	0.7207	-1.4707	12.64054	-229.68	1702.013	-1.6051	0.84063	-1.8715
2.078	-86.435	11.112	712.9865	-0.2301	0.76821	-0.60206	-36.2496	-50.4	1317.236	-0.65186	0.50439	-1.2378	-12.1168	158.019	986.226	-0.37744	0.69727	-1.4131	-8.126	-141.64	1688.157	-1.6797	0.90743	-1.9265
2.08	-132.966	6.325	695.6341	-0.20996	0.74805	-0.58984	-62.576	-132.3392	1291.055	-0.70117	0.5	-1.2402	-11.658	126.572	962.3733	-0.36548	0.67211	-1.365	43.4851	-61.011	1657.053	-1.7	0.93125	-1.9555
2.082	-131.153	-8.259	682.4933	-0.19047	0.72717	-0.57271	-54.132	-169.562	1302.562	-0.83154	0.51025	-1.2456	-24.777	157.826	939.4027	-0.35059	0.65527	-1.3242	23.9007	-1.14699999999999	1599.416	-1.6831	0.93701	-1.9722
2.084	-137.341	-26.979	661.7115	-0.16664	0.70901	-0.55451	-37.3696	-167.55	1337.4947	-0.95949	0.52124	-1.2554	-10.931	190.808	882.46	-0.34277	0.63525	-1.2671	59.518	16.258	1576.689	-1.6696	0.95342	-2.0083
2.086	-122.9382	-36.5319	632.8319	-0.1522	0.69067	-0.53775	-23.58	-150.33	1314.52	-1.0894	0.53613	-1.2593	-30.076	114.1187	875.7454	-0.33984	0.63477	-1.2402	74.179	-5.104	1589.307	-1.6816	0.99922	-2.0473
2.088	-123.2508	-39.1349	598.496	-0.12956	0.67146	-0.52088	1.83767	-141.436	1314.026	-1.2832	0.5752	-1.2832	-28.7142	184.857	810.48356	-0.34375	0.61328	-1.1777	85.658	-8.072	1596.903	-1.7039	1.0449	-2.0789
2.09	-115.485	-32.472	573.697	-0.11084	0.65869	-0.5083	31.944	-169.349	1327.482	-1.394	0.62549	-1.3198	-30.5008	142.483	790.4643	-0.34034	0.6018	-1.1296	111.675	1.914	1607.7035	-1.7411	1.0944	-2.1016
2.092	-97.249	-26.3606	566.2566	-0.095817	0.6341	-0.48361	18.0745	-194.749	1373.875	-1.6113	0.74414	-1.4023	-52.386	140.2451	803.991	-0.33984	0.58838	-1.0786	96.516	-3.525	1634.2218	-1.7749	1.1196	-2.1069
2.094	-97.188	-16.0916	535.7844	-0.083315	0.61067	-0.46614	30.764	-166.701	1439.135	-1.7105	0.80762	-1.4488	-15.909	194.889	750.936	-0.33984	0.57031	-1.0107	89.838	-7.356	1607.268	-1.7919	1.1046	-2.0853
2.096	-66.132	-7.156	523.2957	-0.075881	0.58762	-0.44816	33.4672	-141.782	1467.028	-1.7715	0.85156	-1.4961	-21.613	103.246	743.92	-0.34131	0.55322	-0.97217	96.307	-32.617	1578.69	-1.7746	1.0523	-2.0468
2.098	-92.669	-4.414	545.4622	-0.070217	0.56437	-0.42667	22.269	-118.9052	1437.145	-1.812	0.88721	-1.5601	-38.575	155.098	672.8927	-0.34326	0.52588	-0.90381	85.493	-12.4565	1570.071	-1.7058	0.93515	-2.0016
2.1	-74.502	3.388	542.9391	-0.065918	0.53662	-0.4082	54.1215	-102.99	1408.955	-1.8296	0.9126	-1.6011	-23.229	139.039	656.259	-0.33838	0.50904	-0.85327	20.864	-37.6116	1565.463	-1.6041	0.82676	-1.9517
2.102	-79.096	14.3799	525.5802	-0.06162	0.5165	-0.38896	54.811	-121.705	1393.574	-1.8242	0.94336	-1.6504	-47.1755	112.39	680.014	-0.32471	0.46875	-0.79199	4.501	-31.112	1607.572	-1.4702	0.75439	-1.896
2.104	-103.794	37.782	498.0769	-0.058884	0.49609	-0.3705	40.184	-126.259	1374.957	-1.8174	0.97168	-1.6885	-46.6007	196.798	626.7337	-0.30664	0.44336	-0.71777	-33.0739	-75.2359	1569.839	-1.329	0.69385	-1.8568
2.106	-97.555	36.4936	480.7439	-0.057717	0.47421	-0.35566	67.177	-114.928	1386.241	-1.8203	0.99219	-1.7285	-30.888	108.6046	614.141	-0.29443	0.4292	-0.68115	7.3011	-102.069	1515.844	-1.211	0.65781	-1.8246
2.108	-112.8589	38.06642	463.31641	-0.051465	0.45401	-0.33936	77.5002	-128.533	1405.314	-1.8198	1.0073	-1.7573	-65.6578	156.328	549.8728	-0.2627	0.40234	-0.6084	34.8881	-72.447	1429.1706	-1.1176	0.63398	-1.7953
2.11	-104.2368	34.2563	435.4652	-0.05127	0.43164	-0.32324	79.936	-108.9063	1446.594	-1.8203	1.0078	-1.7598	-55.8221	165.227	510.59	-0.23877	0.38745	-0.56054	32.0258	-19.068	1383.85	-1.0232	0.61221	-1.7485
2.112	-119.5341	23.64	421.9825	-0.047852	0.41416	-0.31709	114.2327	-96.26441	1469.1535	-1.8218	1.0122	-1.769	-60.68	108.726	542.7164	-0.21484	0.36084	-0.50586	-11.9484	61.843	1333.4441	-0.96484	0.58789	-1.709
2.114	-86.945	17.28007	421.6646	-0.044043	0.39678	-0.30703	136.586	-116.931	1485.2739	-1.8242	1.0059	-1.7734	-59.66934	180.7506	475.238	-0.18408	0.33398	-0.44043	-27.1087	88.9098	1321.4456	-0.92451	0.56543	-1.6665
2.116	-68.705	18.502	402.219	-0.045996	0.38506	-0.29219	101.18	-105.603	1488.0248	-1.8086	0.97559	-1.7734	-61.4044	103.038	480.6271	-0.16943	0.31055	-0.40771	-78.21	138.741	1290.298	-0.88105	0.5539	-1.6129
2.118	-74.955	24.398	395.522	-0.043652	0.35967	-0.2876	104.736	-99.76	1483.411	-1.7632	0.93213	-1.7612	-44.115	99.06	428.0411	-0.146	0.2749	-0.34521	-66.14	123.1572	1221.1152	-0.83692	0.54218	-1.5531
2.12	-86.575	28.403	402.1776	-0.044922	0.34326	-0.28223	82.599	-85.5221	1495.628	-1.7146	0.89135	-1.7527	-37.375	137.759	373.781	-0.12866	0.23437	-0.30542	7.65	177.6085	1154.77	-0.79346	0.54248	-1.5028
2.122	-73.466	33.993	410.419	-0.042578	0.33105	-0.27949	63.735	-64.763	1485.01	-1.6641	0.8584	-1.752	-57.685	89.176	395.80672	-0.11426	0.20898	-0.25977	-46.3125	206.77	1083.36	-0.75488	0.55029	-1.459
2.124	-61.999	41.44802	406.308	-0.041113	0.31445	-0.26953	78.187	-50.006	1480.90654	-1.5967	0.82129	-1.7363	-34.528	202.195	334.936	-0.089355	0.17822	-0.21094	-89.626	224.349	1053.862	-0.71357	0.56142	-1.4101
2.126	-95.457	47.2321	395.964	-0.036426	0.30586	-0.26328	81.64947	-70.004	1475.807	-1.5762	0.80957	-1.7197	-34.62	159.528	349.1778	-0.07373	0.16113	-0.1792	-63.2361	201.195	1030.038	-0.68467	0.58095	-1.3605
2.128	-110.8196	37.155	400.753	-0.032324	0.29365	-0.25684	55.9901	-80.891	1440.576	-1.5391	0.78711	-1.7129	-51.301	130.3443	350.9858	-0.040039	0.13867	-0.13916	-61.969	186.152	987.935	-0.66748	0.60283	-1.3073
2.13	-99.11	41.854	381.1136	-0.027344	0.28564	-0.25098	57.7695	-59.98	1415.2504	-1.5024	0.77588	-1.6987	-35.6494	153.7237	313.113	-0.01416	0.12866	-0.11963	-17.26	182.392	934.943	-0.66084	0.61494	-1.2484
2.132	-96.3682	42.796	364.4012	-0.026465	0.2791	-0.24834	53.0222	-50.222	1385.17435	-1.4663	0.77393	-1.6831	-33.846	73.558	340.154	0.01416	0.13281	-0.10889	-0.546000000000003	185.141	944.005	-0.6543	0.61914	-1.1875
2.134	-111.36	31.6488	330.293	-0.026269	0.27314	-0.25058	26.0195	-26.0892	1369.7498	-1.418	0.76953	-1.6582	-16.241	132.621	287.749	0.055176	0.1167	-0.074707	-16.946	210.356	917.29	-0.64893	0.61866	-1.1241
2.136	-99.184	31.2923	328.2914	-0.022754	0.26533	-0.24512	70.662	2.707	1358.298	-1.394	0.77686	-1.6382	-37.531	125.102	292.9221	0.071289	0.11279	-0.060547	-81.8429	216.147	927.014	-0.63955	0.61436	-1.054
2.138	-74.716	31.5417	331.2661	-0.020605	0.25948	-0.24063	54.938	4.7836	1348.129	-1.3491	0.76807	-1.603	-27.197	103.314	278.247	0.10938	0.1001	-0.034668	-59.671	234.095	868.35545	-0.62939	0.60889	-0.9876
2.14	-81.6534	38.6685	308.1335	-0.023438	0.25391	-0.24023	38.34	33.596	1328.295	-1.3245	0.76001	-1.5749	-10.304	136.654	200.298	0.13257	0.088135	-0.0092775	-66.5078	167.143	851.255	-0.61221	0.59326	-0.91865
2.142	-67.641	38.9513	313.934	-0.025488	0.24385	-0.24258	32.8843	57.601	1297.705	-1.3022	0.74658	-1.5464	-18.335	79.034	217.896	0.14941	0.07959	0.0068359	-45.51	174.646	787.731	-0.5918	0.57031	-0.85645
2.144	-59.944	42.335	317.1326	-0.029493	0.23691	-0.23857	-14.534	42.1675	1275.874	-1.2749	0.71924	-1.4995	-6.599	110.7101	182.912	0.17432	0.070801	0.026367	-33.096	169.55854	721.00058	-0.55625	0.55137	-0.78652
2.146	-50.58	41.3521	319.6682	-0.032227	0.23145	-0.23623	-32.364	48.754	1280.6377	-1.2666	0.70508	-1.4727	-19.647	87.166	204.6319	0.18213	0.072754	0.02832	-26.795	214.54	671.825	-0.52724	0.51299	-0.71377
2.148	-66.325	54.24398	305.2707	-0.035352	0.22226	-0.23818	-7.70903	41.52	1278.7849	-1.2417	0.67432	-1.4312	-3.435	72.5684	207.1189	0.20117	0.06543	0.04248	-83.648	260.445	612.677	-0.50303	0.48018	-0.64189
2.15	-76.004	50.1166	305.5877	-0.038086	0.21973	-0.23828	16.343	25.4578	1270.237	-1.2273	0.65014	-1.3913	-26.451	114.402	149.416	0.20435	0.06958	0.057861	-41.04144	261.526	590.8334	-0.48662	0.45049	-0.57246
2.152	-71.485	49.766	316.6997	-0.040137	0.21084	-0.2376	8.9925	29.587	1226.1258	-1.1987	0.63916	-1.353	-40.5933	85.0897	155.543	0.21484	0.064453	0.077148	-13.379	235.5	531.9156	-0.47607	0.43213	-0.51123
2.154	-70.8945	49.738	316.2327	-0.040429	0.20889	-0.23808	39.838	31.9932	1192.1874	-1.167	0.61719	-1.3047	-28.172	115.431	128.9757	0.22754	0.066406	0.078613	-24.083	200.2817	531.051	-0.46455	0.39697	-0.45517
2.156	-74.683	50.963	292.2480436	-0.039258	0.20537	-0.24082	10.0437	41.754	1179.6298	-1.1465	0.61523	-1.2832	-47.5895	117.65	124.4619	0.23438	0.063477	0.083008	-19.108	213.354	496.919	-0.43701	0.36103	-0.37881
2.158	-76.428	48.3971	290.5322	-0.032031	0.20283	-0.24287	7.1143	79.493	1155.35	-1.1006	0.59961	-1.2363	-46.623	108.145	135.853	0.26416	0.053711	0.10596	-38.2113	187.102	494.424	-0.41866	0.32041	-0.31045
2.16	-47.074	35.2385	294.0062	-0.029785	0.20264	-0.24561	37.757	98.109	1135.783	-1.0593	0.58545	-1.1961	-36.8907	122.221	70.725	0.27735	0.05249	0.10913	-62.7551	206.809	419.3213	-0.39736	0.29365	-0.26377
2.162	-58.594	37.4326	285.6057	-0.026367	0.19492	-0.2498	40.352	94.878	1126.0367	-1.0151	0.58447	-1.1626	-49.7022	64.9241	99.5666	0.28369	0.052734	0.10352	-63.413	151.082	358.5102	-0.35938	0.25	-0.20313
2.164	-59.149	43.545	281.3136	-0.021973	0.20029	-0.25303	47.008	103.958	1094.525	-0.95801	0.57617	-1.1133	-32.655	72.2475	75.183	0.29688	0.031738	0.11816	-26.48	138.6403	305.5173	-0.32822	0.23369	-0.16543
2.166	-54.803	40.125	273.343	-0.021191	0.19912	-0.25342	24.916	126.154	1075.014	-0.92236	0.57275	-1.0952	-44.905	32.814	68.0216	0.29883	0.022461	0.12598	-78.285	92.034	290.6004	-0.28711	0.18262	-0.10049
2.168	-34.846	52.3586	275.193	-0.024219	0.19473	-0.25908	-6.8833	139.803	1046.959	-0.86475	0.56787	-1.0444	-42.497	47.1294	68.552	0.30127	0.0063477	0.13232	-71.2406	96.493	276.5151	-0.25781	0.17324	-0.077051
2.17	-39.647	56.7899	275.8037	-0.024902	0.19482	-0.26563	-21.4624	158.661	1010.984	-0.82642	0.56225	-1.01	-53.5794	83.885	35.1557	0.29175	0.0026855	0.12085	-53.7604	95.839	253.3456	-0.23447	0.14482	-0.049121
2.172	-55.722	58.6655	283.19917	-0.021778	0.18828	-0.27227	19.6059	137.19	979.57749	-0.79102	0.55371	-0.96094	-62.743	45.2529	64.07	0.27783	-0.0063477	0.11572	-39.823	91.239	217.8605	-0.20801	0.09082	0.0058594
2.174	-67.848	55.955	299.95	-0.02168	0.17998	-0.27813	-7.1774	104.8534	943.8055	-0.75391	0.54883	-0.90527	-38.69	77.432	50.2794	0.25293	-0.010742	0.10645	-13.809	111.178	198.755	-0.19287	0.066309	0.036035
2.176	-59.657	58.672	299.4852	-0.015039	0.18076	-0.28633	-24.4462	108.593	908.273	-0.74023	0.53809	-0.88477	-35.708	34.6556	50.7043	0.24707	-0.01123	0.10596	-18.112	95.514	172.6038	-0.18438	0.036816	0.046777
2.178	-67.568	59.71	299.0588	-0.0095702	0.1791	-0.29238	19.2691	110.8647	872.792	-0.71045	0.52197	-0.82178	-59.952	18.929	67.2827	0.2251	-0.0058594	0.095215	-35.664	111.365	119.851	-0.18984	0.023926	0.069433
2.18	-80.1223	50.0905	298.5864	-0.0029297	0.18311	-0.30029	-22.7571	98.335	850.7226	-0.68579	0.51171	-0.77978	-21.771	49.2257	42.459	0.20557	0.01123	0.081055	-60.22	92.136	126.644	-0.19112	0.012793	0.088965
2.182	-71.223	44.6106	292.20868	-0.0044922	0.18662	-0.30937	-24.3355	114.6587	822.5953	-0.66016	0.49805	-0.73633	-36.7146	-8.555	60.134	0.20264	0.021973	0.078125	-25.816	127.46299	95.567	-0.19629	0.010254	0.10205
2.184	-63.053	46.6762	269.914	-0.0072266	0.18994	-0.32373	-18.7049	107.0688	794.7137	-0.61768	0.47119	-0.6709	-32.523	42.31145	33.2805	0.18799	0.05127	0.067871	-31.1934	118.55601	100.5545	-0.20029	0.013574	0.11836
2.186	-73.6173	59.844	248.463	-0.010742	0.19384	-0.33233	-10.727	106.634	771.4613	-0.60156	0.46484	-0.64648	-5.085	21.9698	3.04842	0.1875	0.074707	0.060303	-13.08	154.62	63.533	-0.20811	0.020703	0.13154
2.188	-56.701	48.7687	265.987	-0.023632	0.20449	-0.34258	-34.5693	140.035	739.3031	-0.56445	0.4375	-0.59277	-33.534	16.2504	21.454795	0.18994	0.093262	0.058594	-38.2432	112.415	41.321	-0.21123	0.024219	0.1503
2.19	-58.282	45.062	295.4491	-0.032227	0.20898	-0.34473	-24.6554	144.5751	724.34135	-0.52857	0.41285	-0.54981	-16.907	71.013	5.15564	0.19238	0.11963	0.055664	-47.5006	111.526	18.72	-0.20791	0.041113	0.16514
2.192	-55.131	38.307	307.6968	-0.043359	0.21797	-0.36465	-42.056	142.3162	713.672	-0.49316	0.39746	-0.51123	-9.023	5.436	31.9108	0.19482	0.12842	0.060547	-50.6467	91.047	23.373	-0.20313	0.060059	0.17334
2.194	-70.791	47.5349	310.7818	-0.05625	0.22539	-0.37773	-44.0288	154.7987	650.1995	-0.45264	0.36475	-0.45654	-10.323	50.5661	7.636	0.20459	0.14014	0.07373	-10.175	77.096	29.3006	-0.19687	0.077539	0.17412
2.196	-62.39	50.84948	316.43164	-0.071094	0.24063	-0.38789	-18.072	153.8967	616.243	-0.42725	0.35107	-0.43701	-9.4622	15.506	1.661	0.21338	0.14258	0.081055	13.28	72.162	38.889	-0.19258	0.089844	0.17764
2.198	-61.532	54.79	325.2791	-0.081055	0.25	-0.39727	-39.826	129.54958	587.134	-0.38965	0.31934	-0.38672	-13.639	-20.7132	31.2051	0.21289	0.14209	0.093262	-19.536	50.0988	62.3868	-0.18242	0.10078	0.19052
2.2	-75.688	71.948	320.1727	-0.088867	0.26172	-0.4082	-29.685	131.37	549.649	-0.3501	0.30005	-0.34765	7.235	48.9083	19.486	0.21729	0.12744	0.10059	-26.2799	51.983	53.609	-0.17793	0.10723	0.20352
2.202	-81.28	72.496	311.4614	-0.096974	0.27227	-0.41739	-35.8062	123.9243	544.0131	-0.30957	0.27344	-0.30859	-25.773	-21.5289	30.027	0.22412	0.11963	0.1084	-30.77	29.0701	68.6667	-0.17529	0.11133	0.21191
2.204	-78.1079	68.856	306.467	-0.10771	0.28564	-0.42685	-36.869	114.7472	519.2664	-0.25732	0.25635	-0.27295	-12.649	44.601	10.6784	0.23291	0.10107	0.11377	-8.8993	58.994	49.0494	-0.16592	0.11446	0.22646
2.206	-55.132	52.514	327.2491	-0.11045	0.29268	-0.43506	-18.4186	111.2	465.164	-0.2373	0.25439	-0.26563	-8.865	59.231	2.0215	0.23852	0.08789	0.11914	-10.378	15.4921	71.513	-0.14638	0.1125	0.24326
2.208	-75.2149	62.1415	331.1727	-0.11709	0.3041	-0.44199	8.6939	103.506	451.419	-0.17822	0.23584	-0.22656	-25.556	8.49213	28.8862	0.24268	0.077148	0.12549	9.197	42.456	63.086	-0.11943	0.1086	0.26435
2.21	-65.479	59.749	341.205	-0.12012	0.31494	-0.44873	-11.814	106.3452	426.865	-0.14062	0.21313	-0.18872	-17.711	81.242	14.332	0.23975	0.068359	0.11816	-45.6464	-7.089	64.252	-0.082422	0.10879	0.28252
2.212	-47.991	58.8653	353.8955	-0.12578	0.32188	-0.45801	-4.703	145.338	384.047	-0.10938	0.19922	-0.1709	-29.573	1.177	29.489	0.24609	0.063477	0.12451	-33.165	-15.9443	43.3746	-0.036621	0.11279	0.30029
2.214	-46.927	60.73434	360.02078	-0.13135	0.32901	-0.46748	17.7001	145.405	398.1226	-0.070801	0.18066	-0.14014	-38.1302	30.6715	5.858	0.24902	0.061523	0.11621	-27.47978	-26.23521	28.2403	0.012989	0.10479	0.31953
2.216	-64.078	68.1066	365.00884	-0.13564	0.34073	-0.47295	-4.852945	128.9631	399.4185	-0.049805	0.16113	-0.11621	-11.057	46.8822	-2.353	0.25659	0.057861	0.11059	-21.261	-2.5865	-0.5371	0.076856	0.093945	0.34102
2.218	-59.991	61.2307	376.97585	-0.14209	0.34844	-0.48321	6.3981	100.7039	388.4305	-0.025879	0.16064	-0.099609	-58.8712	-6.6822	29.5057	0.26807	0.061035	0.10205	-21.704	22.4774	-5.3197	0.13584	0.094336	0.33789
2.22	-60.431	58.5825	394.3571	-0.14551	0.35449	-0.49072	7.9981	71.5758	372.685	-0.015625	0.14771	-0.086426	-44.337	75.826	3.995	0.27832	0.058594	0.081055	-22.555	33.6638	10.738	0.20782	0.058691	0.35303
2.222	-72.309	58.529	402.4379	-0.14834	0.36201	-0.4999	10.8622	65.5506	335.0345	0.003418	0.14209	-0.069336	-17.201	34.538	29.439	0.28223	0.06543	0.066406	-49.206	31.6252	8.521	0.2793	0.026367	0.35889
2.224	-71.103	57.133	404.7649	-0.15811	0.37139	-0.50674	-1.213	97.386	279.386	0.035645	0.12256	-0.036621	-65.032	44.982	25.1887	0.29297	0.068359	0.036621	-38.0201	0.3888	36.24	0.3333	-0.010644	0.35186
2.226	-83.5338	46.1664	409.1599	-0.16592	0.38388	-0.51767	5.905	92.629	273.695	0.037109	0.12354	-0.03418	-42.6114	73.766	24.5866	0.2959	0.078125	0.01416	-14.5386	38.5057	8.458	0.37266	-0.053027	0.34473
2.228	-86.6373	45.9451	420.93504	-0.16953	0.39277	-0.52627	-5.206	97.708	226.554	0.063477	0.12109	-0.024902	-31.136	-8.0413	53.1131	0.29883	0.091309	-0.01123	-25.9849	6.1717	21.227	0.39727	-0.080762	0.32325
2.23	-70.213	59.9655	418.6482	-0.17139	0.40527	-0.53516	-12.5817	84.727	185.44	0.081055	0.12134	-0.023926	-46.9883	59.505	11.319	0.29297	0.12109	-0.044922	-11.042	37.9528	-8.1925	0.42012	-0.12646	0.32891
2.232	-69.014	66.1903	419.02837	-0.17237	0.41748	-0.53808	6.62518	63.2309	204.965	0.098633	0.12256	-0.014648	-34.7109	9.7704	22.4788	0.29492	0.13623	-0.066406	-34.674	1.157	-5.406	0.43799	-0.18799	0.35352
2.234	-77.563	59.7392	422.5026	-0.17187	0.42969	-0.54082	-13.3012	71.6603	214.2359	0.10693	0.13135	-0.015625	-15.647	2.79357	22.2118	0.28662	0.18018	-0.10205	-41.649	-3.646	-27.0273	0.42402	-0.17764	0.30674
2.236	-70.104	70.43511	436.2078	-0.16484	0.44297	-0.54082	-20.216	91.0682	215.61344	0.11182	0.12402	-0.011719	-31.473	41.048	14.923	0.2854	0.21485	-0.12769	-21.824	-16.185	-17.277	0.42783	-0.22256	0.31934
2.238	-61.137	70.6271	440.4353	-0.14951	0.45225	-0.54717	-5.164	96.4199	214.293	0.11914	0.12305	-0.0014648	-43.089	-5.5047	44.421	0.28516	0.24805	-0.16504	11.467	13.381	14.4683	0.42705	-0.21474	0.3041
2.24	-72.801	73.8254	441.961	-0.13672	0.46436	-0.55664	-28.7752	100.326	174.4862	0.11425	0.12768	-0.0043945	-4.706	56.76	19.6013	0.28369	0.29004	-0.20996	-40.487	34.964	6.2619	0.41406	-0.20156	0.27051
2.242	-59.702	70.7237	473.4242	-0.12432	0.47139	-0.55908	-34.7529	101.424	137.9391	0.10889	0.12402	-0.0019531	-14.211	35.9687	46.572	0.28076	0.3125	-0.22803	-32.6773	34.9873	18.3866	0.39941	-0.17725	0.23682
2.244	-83.21	69.084	478.7089	-0.11201	0.47813	-0.56641	-26.3543	87.669	149.7475	0.10352	0.11768	0.0083008	-19.532	21.7145	56.66	0.2749	0.34277	-0.26367	-20.145	55.316	1.809	0.39014	-0.15947	0.21357
2.246	-94.0493	81.294	471.8368	-0.10068	0.48516	-0.56797	-36.4965	84.846	122.367	0.10303	0.11572	0.01416	5.724	48.497	32.2863	0.26465	0.36694	-0.28736	-26.996	31.2293	28.3066	0.37862	-0.12949	0.19297
2.248	-95.8866	87.084	472.2674	-0.087109	0.4917	-0.56533	-31.6074	82.402	98.578	0.09082	0.1123	0.011719	-14.219	-4.39082	31.8077	0.25	0.38867	-0.30713	11.079	66.2189	23.0883	0.35635	-0.098242	0.16484
2.25	-97.4027	85.4509	481.1621	-0.079102	0.49609	-0.56445	-36.4721	55.1065	105.29	0.087402	0.10498	0.026123	-16.478	48.103	-16.7591	0.22461	0.45166	-0.34619	-15.458	33.6646	52.3775	0.33632	-0.06084	0.13047
2.252	-82.195	80.7976	489.77871	-0.064746	0.50323	-0.56553	-48.2807	38.794	97.8344	0.083008	0.10303	0.026367	-10.509	15.1981	16.2406	0.21533	0.47998	-0.36865	-25.8594	70.955	33.817	0.31543	-0.022949	0.11279
2.254	-85.9259	93.8598	477.5401	-0.048633	0.50645	-0.56533	-38.4798	32.596	85.4934	0.077637	0.10156	0.035645	-19.051	17.61648	29.933	0.19238	0.53809	-0.42188	-37.9673	31.204	9.871	0.29082	0.010059	0.084082
2.256	-74.136	82.528	476.526	-0.032617	0.51153	-0.56846	-10.477	33.674	104.906	0.07373	0.099121	0.038574	-11.352	42.7704	7.5142	0.17407	0.56323	-0.4436	-6.464	56.536	15.659	0.2666	0.041211	0.063476
2.258	-69.832	84.646	495.58	-0.020019	0.51661	-0.57149	-33.0716	51.9872	81.562	0.078613	0.098633	0.05127	-3.104	6.5678	71.269	0.15186	0.57666	-0.46338	-23.8476	48.027	6.94747	0.23965	0.066602	0.044336
2.26	-67.517	83.7934	526.4858	-0.0043945	0.52148	-0.57422	-16.23457	75.465	64.1358	0.078613	0.098145	0.046875	-19.046	71.732	79.831812	0.093262	0.60205	-0.51025	-4.6	61.348	24.2052	0.21992	0.096191	0.02373
2.262	-77.067	94.746971	523.5933	-9.7656e-05	0.52519	-0.57979	-11.84888	79.032	93.645	0.084473	0.09668	0.05127	-40.6614	50.8818	137.0041	0.05127	0.60303	-0.55811	-22.6126	45.931	49.1376	0.19824	0.12842	0.0043945
2.264	-59.776	96.0978	519.32636	-0.00068359	0.5293	-0.58281	-21.6744	69.2961	61.6934	0.085449	0.091797	0.057129	-28.506	57.2683	203.2721	-0.0625	0.57959	-0.64795	-53.698	13.0233	45.8395	0.17871	0.15557	-0.013379
2.266	-69.176	101.229	535.5611	-0.0092775	0.5332	-0.58867	3.483	57.1746	38.0608	0.085937	0.091064	0.060547	-62.132	92.233	278.571	-0.18311	0.56885	-0.73584	-22.2286	3.1325	58.299	0.16113	0.18018	-0.02959
2.268	-94.782	115.058	543.7888	-0.026563	0.53896	-0.59092	-7.5146	40.88	58.3029	0.086914	0.086426	0.062988	-91.401	38.994	473.693	-0.34473	0.56055	-0.83203	-21.9643	-40.648	67.572	0.15293	0.20635	-0.045605
2.27	-98.461	113.911	549.0476	-0.041504	0.54346	-0.59619	-7.415	41.83	32.9001	0.086914	0.07959	0.05957	-84.032	97.7676	624.412	-0.63623	0.57471	-0.96631	-5.491	7.177	28.7555	0.15244	0.23164	-0.054981
2.272	-92.9848	109.232	538.9672	-0.058594	0.55039	-0.60918	12.2959	31.1872	33.1865	0.086426	0.067383	0.058594	-99.092	65.6972	810.26	-0.81445	0.5957	-1.0313	-17.238	-14.568166	34.9288	0.16064	0.25977	-0.067383
2.274	-92.9704	110.33155	535.959	-0.074023	0.56055	-0.61582	5.4922	33.6713	48.1396	0.085938	0.062988	0.049805	-105.971	56.888	978.398	-1.1973	0.67578	-1.1387	-34.3011	36.722	9.2384	0.1748	0.28984	-0.082715
2.276	-79.468	114.0367	543.902	-0.085351	0.56953	-0.62402	-1.194	30.9031	2.80223	0.085205	0.057373	0.051514	-119.7767	64.526	1112.995	-1.4764	0.78931	-1.24	-57.684	2.0013	5.9237	0.19483	0.30859	-0.089063
2.278	-78.348	118.4286	553.4114	-0.10869	0.57685	-0.64209	-8.377	31.293	6.90005	0.080078	0.055664	0.053223	-146.5927	-25.92	1237.811	-1.689	0.93604	-1.314	-23.4792	11.0405	6.1613	0.21319	0.32774	-0.10625
2.28	-71.212	117.6225	555.30166	-0.13086	0.58887	-0.6543	-16.0217	24.00879	25.3779	0.077637	0.046875	0.047363	-149.8616	-20.866	1239.825	-1.7988	1.1709	-1.3691	-10.298	-7.9386	35.2879	0.225	0.3418	-0.12832
2.282	-74.363	122.1861	561.4972	-0.15508	0.59942	-0.67187	-13.8975	21.8637	-3.377	0.073242	0.041504	0.041504	-126.7006	-78.131	1252.162	-1.7734	1.291	-1.3828	-12.171	7.4162	21.6505	0.22803	0.34229	-0.13916
2.284	-57.527	131.83228	564.328446	-0.17763	0.61601	-0.68496	15.13	21.458	13.723	0.073242	0.038574	0.04248	-114.28	-93.1812	1261.837	-1.5913	1.4731	-1.4487	-45.938	13.1418	8.802	0.2165	0.3582	-0.16768
2.286	-96.1236	128.85113	573.7537	-0.20381	0.62578	-0.70644	-18.5208	3.531	41.4492	0.074463	0.043213	0.044189	-142.317	-37.5075	1240.0199	-1.3569	1.5581	-1.4829	-40.241	29.6121	4.932	0.19814	0.35576	-0.18252
2.288	-85.666	119.3531	593.66999	-0.22978	0.64336	-0.71758	-27.92584	-4.6495	32.263	0.072754	0.04541	0.049805	-137.363	-106.1406	1283.506	-1.0815	1.5923	-1.4819	-15.9277	40.957	-29.5099	0.17393	0.36084	-0.1915
2.29	-94.633	136.9495	581.122	-0.25049	0.65088	-0.72998	8.3257	7.7711	36.0053	0.078125	0.056152	0.052734	-140.6157	-83.118	1253.0249	-0.74219	1.4688	-1.3613	-4.565	10.366	2.98605	0.1414	0.37266	-0.2042
2.292	-93.819	152.942	569.3351	-0.27022	0.66875	-0.74257	-20.5695	10.4774	24.3562	0.087891	0.058105	0.049805	-82.671	-154.063	1250.287	-0.62451	1.3599	-1.2808	-14.277	39.183	-14.4397	0.11084	0.39453	-0.22412
2.294	-110.02805	151.414	561.054	-0.28584	0.67607	-0.7499	-32.4133	30.7311	-17.3976	0.098633	0.058594	0.054199	-35.497	-201.888	1271.404	-0.52881	1.1743	-1.1675	-16.255	0.584	13.8019	0.083887	0.41972	-0.24522
2.296	-110.705	145.5991	568.27517	-0.29678	0.68818	-0.75616	-15.212	22.86	3.9869	0.10889	0.067871	0.061279	-8.547	-111.153	1251.5011	-0.54688	1.0847	-1.1301	-29.9746	52.0231	3.218	0.067383	0.44268	-0.2627
2.298	-93.216	148.72173	568.6349	-0.30225	0.69492	-0.76035	-36.164	17.2158	20.8119	0.1167	0.076172	0.058105	-16.706	-111.937	1295.289	-0.60352	1.0059	-1.1094	-36.7319	28.4668	21.0096	0.062695	0.45596	-0.26777
2.3	-92.804	163.7656	563.5484	-0.30225	0.6958	-0.76807	-26.5609	10.9087	-15.6451	0.13281	0.088379	0.067871	-46.625	-36.24	1281.94	-0.70508	0.91895	-1.0742	5.402	44.4733	10.2234	0.068067	0.47236	-0.28105
2.302	-85.103	152.7705	580.9473	-0.29864	0.69824	-0.76972	-20.31391	4.072	-3.45	0.14111	0.084961	0.071289	-72.3567	-61	1269.929	-0.75977	0.90234	-1.0645	-27.0107	16.7778	26.4762	0.071289	0.49414	-0.29883
2.304	-87.179	162.51212	580.4638	-0.29179	0.69551	-0.77149	-47.002	6.1725	22.076	0.14844	0.091797	0.074219	-97.1929	-164.48	1278.2928	-0.87842	0.8833	-1.0835	-35.9528	39.155	29.856	0.076758	0.5331	-0.32256
2.306	-71.734	154.3465	583.8437	-0.28672	0.69356	-0.775	-28.9865	19.9988	9.881	0.1621	0.084229	0.083984	-31.995	-155.328	1280.602	-0.93848	0.89454	-1.1309	-25.2753	34.8528	9.168	0.079493	0.55801	-0.32851
2.308	-85.909	168.6833	579.647	-0.28096	0.68448	-0.77539	0.690999999999999	34.826	31.5327	0.17334	0.082031	0.091797	-32.643	-250.055	1334.271	-0.96826	0.91064	-1.1792	-22.826	36.8799	24.657	0.085742	0.58183	-0.32305
2.31	-96.96	153.625185	570.577	-0.26904	0.67285	-0.78027	-33.461	29.53	14.6863	0.17725	0.078613	0.09375	-57.2873	-256.449	1344.763	-0.98633	0.94141	-1.2383	-14.3467	56.627	24.8275	0.094433	0.61885	-0.32969
2.312	-91.302	152.4066	584.2016	-0.26572	0.66357	-0.78525	-22.351	14.334	-7.4742	0.17871	0.074219	0.098145	-22.928	-252.9645	1353.8319	-0.99756	0.95166	-1.2671	-18.612	33.472	46.9856	0.10303	0.65479	-0.354
2.314	-88.552	160.817	582.5385	-0.26309	0.64814	-0.78506	-1.335	21.0285	25.3184	0.18359	0.072754	0.10352	14.235	-346.963	1363.563	-1.0405	0.9751	-1.3296	3.382	58.158	59.9251	0.11397	0.67256	-0.38281
2.316	-105.6074	170.151	580.3517	-0.26855	0.63642	-0.78779	-38.436	20.8505	14.0925	0.18726	0.06958	0.10108	49.733	-308.927	1339.878	-1.083	1.0078	-1.3681	-27.0738	-1.352	100.374	0.11836	0.67354	-0.40176
2.318	-99.266	164.708	570.7	-0.27881	0.62832	-0.80606	3.313	15.3102	0.0358000000000001	0.1958	0.066406	0.094727	51.495	-356.85	1388.281	-1.1245	1.0415	-1.4019	-27.8164	34.9066	118.611	0.099999	0.69229	-0.43848
2.32	-92.7707	157.1459	586.861	-0.28564	0.62744	-0.81006	5.3201	17.0625	13.703	0.20605	0.071289	0.089355	38.228	-352.196	1460.894	-1.1807	1.0859	-1.4336	-34.2457	13.8623	177.8044	0.053125	0.69101	-0.4957
2.322	-78.479	156.265	583.997	-0.29219	0.63164	-0.82207	-26.0563	-2.22053	6.455	0.21338	0.071777	0.085938	8.957	-271.077	1549.925	-1.2156	1.138	-1.4655	-54.2441	53.152	270.8756	-0.0083008	0.68066	-0.55859
2.324	-78.782	153.221	593.141	-0.29893	0.63916	-0.8335	19.024	-3.0299	3.65	0.22217	0.067383	0.064453	-34.39	-293.083	1636.009	-1.25	1.1973	-1.4961	-69.128	29.993	430.877	-0.11347	0.64375	-0.65176
2.326	-58.807	135.034	597.145	-0.30362	0.64658	-0.8503	10.8749	20.6437	20.2096	0.22413	0.066406	0.053467	-72.1342	-197.122	1605.72	-1.2827	1.2661	-1.5444	-98.384	47.147	632.556	-0.2625	0.61367	-0.7543
2.328	-76.906	124.497	609.548	-0.321	0.65186	-0.86904	-26.7685	27.434	25.1333	0.22607	0.071289	0.04248	-92.694	-197.074	1569.432	-1.291	1.3047	-1.5703	-106.4429	24.94424	873.113	-0.49063	0.57226	-0.85274
2.33	-63.623	124.342	619.352	-0.34717	0.65869	-0.89014	7.12	22.981	11.9643	0.2207	0.076172	0.021484	-122.1163	-180.381	1541.856	-1.3086	1.3789	-1.623	-78.442	21.6563	1131.594	-0.80674	0.56338	-0.95968
2.332	-65.713	112.202	656.57	-0.38574	0.66191	-0.91153	13.87	21.2236	8.3138	0.21582	0.078125	0.013184	-129.7565	-96.338	1535.801	-1.3247	1.4434	-1.6699	-56.141	18.7066	1370.028	-1.2085	0.57666	-1.0796
2.334	-62.934	108.126	684.26	-0.42656	0.6664	-0.93516	-22.4515	23.2847	-10.5379	0.20557	0.097168	-0.0043945	-108.148	-132.407	1592.0102	-1.3379	1.5215	-1.7188	-102.3637	-19.508	1563.1507	-1.6766	0.64599	-1.2028
2.336	-69.437	117.018	737.03	-0.47383	0.67148	-0.96094	12.2994	35.5869	-9.153	0.19043	0.11352	-0.013672	-73.692	-82.192	1595.761	-1.3491	1.6099	-1.7769	-122.3454	-60.861	1664.128	-2.1746	0.77188	-1.3164
2.338	-79.139	136.467	793.97	-0.52773	0.68193	-0.9875	2.48	31.4383	21.48559	0.17871	0.13232	-0.029297	-60.6398	-117.355	1610.641	-1.3315	1.6509	-1.7964	-137.402	-152.861	1665.453	-2.568	0.9457	-1.373
2.34	-99.1375	141.513	862.28	-0.58936	0.68408	-1.0112	-39.4478	15.3903	10.4909	0.16504	0.16162	-0.047852	-69.8625	-167.161	1626.078	-1.2964	1.7271	-1.8315	-156.8432	-130.902	1597.464	-2.7653	1.2042	-1.3954
2.342	-106.3229	162.6143	946.12	-0.65058	0.69434	-1.0598	-7.183	20.0694	-3.28973	0.15283	0.17676	-0.055664	-80.3343	-94.367	1627.399	-1.25	1.7578	-1.8389	-103.574	-146.47	1542.5	-2.7734	1.4922	-1.4141
2.344	-102.023	191.568	1024.53	-0.72842	0.70029	-1.1042	-26.42272	19.8644	23.9372	0.14941	0.2085	-0.075684	-101.77	-96.732	1661.444	-1.1992	1.7773	-1.8379	-96.261	-105	1529.113	-2.5404	1.7057	-1.4678
2.346	-123.952	217.783	1101.23	-0.81592	0.71436	-1.155	-18.3701	26.42136	5.8915	0.1455	0.22754	-0.084717	-99.837	-13.279	1659.627	-1.1206	1.7622	-1.7983	-154.271	-172.321	1534.905	-2.1226	1.811	-1.5332
2.348	-127.175	220.305	1196.49	-0.92578	0.73789	-1.1992	-6.965	27.6671	7.0929	0.14209	0.24756	-0.10596	-128.659	-56.1695	1671.55	-1.0869	1.7393	-1.7734	-114.97	-215.407	1460.3968	-1.5918	1.8324	-1.5211
2.35	-111.791	204.508	1281.79	-1.0483	0.76807	-1.2437	-26.6168	26.9654	19.5121	0.12939	0.2627	-0.1377	-143.825	-128.92116	1700.026	-1.0273	1.6582	-1.6992	-35.529	-336.17	1399.1104	-1.1383	1.7922	-1.4019
2.352	-103.23	189.7579	1356.73	-1.1704	0.8124	-1.2794	-34.5378	17.1319	-4.998	0.11426	0.27637	-0.14648	-132.45	-108.5899	1698.806	-0.99364	1.5908	-1.6514	21.4774	-318.47	1379.5471	-0.86719	1.6855	-1.2842
2.354	-111.968	168.963	1409.86	-1.2758	0.86953	-1.3143	-16.0728	13.035	21.4855	0.069824	0.2876	-0.1748	-116.722	-145.914	1694.418	-0.96436	1.5396	-1.6108	42.0785	-266.406	1438.0671	-0.79111	1.512	-1.2468
2.356	-100.44	100.191	1443.94	-1.3492	0.9336	-1.3455	-18.1391	-17.7739	55.1179	0.017334	0.28588	-0.20557	-91.288	-60.99	1625.931	-0.94336	1.4922	-1.5723	-40.229	-184.196	1478.273	-0.81445	1.3385	-1.2418
2.358	-85.8294	34.54	1456.94	-1.3621	0.99725	-1.3539	-36.7135	-31.767	53.608	-0.038086	0.27295	-0.23535	-65.622	-34.922	1549.256	-0.92725	1.4731	-1.5581	-124.527	-133.81	1444.731	-0.92773	1.2041	-1.2387
2.36	-81.2554	-24.96	1438.62	-1.3198	1.0649	-1.354	-18.898	-15.4913	96.084	-0.15088	0.25391	-0.27637	-60.544	-36.4492	1494.923	-0.91211	1.4688	-1.5371	-90.4769	-157.02	1429.875	-1.1093	1.1021	-1.2046
2.362	-77.6388	-66.96	1400.85	-1.2212	1.1139	-1.3399	-28.7938	3.2433	125.8317	-0.23193	0.22412	-0.31641	-34.987	15.9919	1445.46	-0.89502	1.4624	-1.5307	-57.068	-197.29	1459.024	-1.3281	1.0381	-1.1641
2.364	-57.4744	-99.05	1365.22	-1.0663	1.1259	-1.2995	-74.0681	14.0734	176.155	-0.41602	0.25732	-0.29492	-27.959	-31.45	1484.6109	-0.87695	1.4609	-1.5156	-63.092	-249.205	1529.535	-1.5195	0.99999	-1.1688
2.366	-50.863	-129.12	1332.01	-0.8706	1.0931	-1.2479	-63.139	25.3653	272.6	-0.61645	0.22217	-0.43115	-4.90799999999999	36.0197	1491.0844	-0.83887	1.4478	-1.4956	-47.2706	-237.254	1547.864	-1.6457	0.97832	-1.1918
2.368	-51.336	-118.554	1269.52	-0.65996	1.0353	-1.2013	-68.6274	20.9487	397.587	-0.78271	0.23486	-0.45605	-14.141	42.9647	1464.7679	-0.81641	1.4395	-1.4844	-51.405	-296.4729	1571.258	-1.7019	0.98301	-1.234
2.37	-43.612	-100.99	1225.82	-0.45459	0.95752	-1.1577	-44.269	32.3391	528.629	-1.084	0.26855	-0.53711	-34.445	63.886	1424.0457	-0.78662	1.4155	-1.4565	-44.723	-305.193	1564.388568	-1.7108	1.0056	-1.2815
2.372	-19.664	-73.256	1190.07	-0.27735	0.87852	-1.1273	-25.088	36.5728	682.014	-1.2495	0.3042	-0.57471	-67.6339	133.695	1360.47	-0.77027	1.3977	-1.4353	26.4013	-392.578	1591.16	-1.6792	1.0425	-1.3335
2.374	-19.069	-42.61	1167.89	-0.11738	0.79648	-1.1032	-40.453	39.7641	809.863	-1.5952	0.40674	-0.6665	-52.138	77.979	1361.425	-0.76807	1.3774	-1.4136	103.17	-390.65	1641.9821	-1.6376	1.0909	-1.4052
2.376	-21.073	-3.22999999999999	1138.78	0.019336	0.71719	-1.0871	-44.504	62.2002	887.409	-1.7891	0.4812	-0.7129	-38.004	110.253	1339.102	-0.76709	1.3462	-1.3823	128.241	-430.86	1682.94	-1.6419	1.0974	-1.4413
2.378	2.42399999999999	15.14	1105.52	0.13194	0.63486	-1.0783	-66.284	61.459	985.88858	-1.9316	0.57715	-0.7627	-26.835	49.0066	1333.47	-0.76514	1.3364	-1.3706	84.193	-383.143	1781.46031	-1.6806	1.0798	-1.4402
2.38	13.383	24.27	1050.54	0.23291	0.54688	-1.0684	-65.053	46.008	1036.388	-2.0308	0.74854	-0.85303	-23.86	11.822	1335.1643	-0.76123	1.3052	-1.3335	-10.19	-326.043	1877.482	-1.7548	1.0847	-1.4579
2.382	30.207	35.23	1005.93	0.32383	0.47012	-1.0675	-80.244	30.1914	1048.1844	-2.0137	0.83301	-0.86523	-13.0102	59.012	1295.973	-0.74853	1.2739	-1.3003	-58.2921	-267.278	1888.44	-1.8306	1.1196	-1.4937
2.384	44.842	13.6	970.92	0.40801	0.39307	-1.0714	-70.6111	-7.865	1064.4189	-1.9468	1.0542	-0.90527	-31.9663	-1.33600000000001	1300.3655	-0.72559	1.2383	-1.2676	-74.9942	-198.362	1861.41	-1.8902	1.1721	-1.5363
2.386	60.971	-22.99	927.25	0.48106	0.32666	-1.0761	-62.2272	-31.451	1055.031	-1.8799	1.206	-0.99024	-19.823	74.513	1254.9744	-0.68604	1.1899	-1.2241	-97.6613	-141.386	1819.216	-1.9295	1.2383	-1.5793
2.388	74.47	-73.077	887.958	0.54443	0.27344	-1.0851	-90.332	-40.5915	1035.025	-1.7539	1.3125	-1.0703	-12.812	87.372	1211.797	-0.66699	1.1641	-1.1934	-147.484	-64.954	1784.601	-1.9361	1.3019	-1.6204
2.39	82.66	-106.134	852.907	0.59033	0.24854	-1.1074	-68.995	-56.099	1060.7721	-1.4409	1.3306	-1.0659	-44.339	100.27	1167.326	-0.62109	1.1094	-1.1543	-140.931	-38.864	1797.417	-1.9273	1.3845	-1.6755
2.392	101.4	-143.845	851.541	0.62773	0.23633	-1.1296	-49.3997	-57.902	1076.7	-1.293	1.3145	-1.0391	-31.7326	191.897	1112.483	-0.58789	1.0713	-1.122	-118.61	-2.40300000000001	1784.7716	-1.9023	1.4863	-1.7324
2.394	74.256	-159.258	863.476	0.64004	0.2374	-1.1647	-41.1936	-68.978	1073.955	-1.1108	1.229	-0.95947	-53.023	131.675	1153.566	-0.55469	1.0352	-1.0918	-59.3041	-41.4104	1777.787	-1.8524	1.5858	-1.7735
2.396	93.799	-170.252	885.324	0.62207	0.2585	-1.2191	-20.35	-126.279	1105.548	-1.1113	1.1016	-0.90527	-68.896	195.024	1100.939	-0.49951	0.97705	-1.0386	-6.241	-63.0597	1777.537	-1.7874	1.6739	-1.8089
2.398	101.238	-176.186	900.803	0.59199	0.28896	-1.278	-6.577	-133.348	1120.1575	-1.1445	1.0273	-0.8877	-45.2005	178.932	1057.2097	-0.4707	0.95508	-1.0215	-17.95	-94.752	1778.212	-1.7202	1.7247	-1.8136
2.4	98.758	-173.319	915.118	0.53564	0.32715	-1.3506	-63.5378	-145.189	1147.24	-1.2476	0.92139	-0.85693	-48.946	149.816	1019.176	-0.41455	0.89111	-0.97412	-57.258	-64.316	1782.948	-1.6521	1.7405	-1.7896
2.402	113.235	-168.533	919.079	0.44659	0.3834	-1.4322	-70.8726	-142.54	1221.506	-1.3414	0.87891	-0.85107	-40.6187	208.72	930.684	-0.37622	0.84937	-0.94507	-107.5633	-26.4404	1803.9267	-1.5898	1.7129	-1.7461
2.404	123.312	-146.126	914.563	0.3375	0.44658	-1.5042	-66.7844	-115.713	1226.657	-1.4297	0.84961	-0.86426	-41.6635	140.7057	931.53757	-0.34033	0.80908	-0.92139	-159.625	-14.356	1788.395	-1.5237	1.6419	-1.6722
2.406	153.079	-114.588	917.819	0.22383	0.51768	-1.5683	-83.277	-134.837	1215.027	-1.5229	0.82178	-0.8999	-9.481	195.592	880.3126	-0.29248	0.74561	-0.88184	-202.818	-19.498	1768.838	-1.4657	1.5504	-1.6004
2.408	119.461	-84.539	926.869	0.11953	0.59091	-1.629	-43.6957	-165.086	1219.257	-1.5625	0.82031	-0.9248	-11.2464	171.6647	853.8083	-0.2749	0.71777	-0.86133	-203.381	-76.516	1749.422	-1.4141	1.4676	-1.5332
2.41	139.546	-77.602	929.166	0.014648	0.6626	-1.6831	-40.2739	-212.114	1213.305	-1.627	0.83203	-0.99609	7.216	116.364	832.117	-0.24854	0.66211	-0.81641	-193.009	-70.624	1698.746	-1.364	1.3982	-1.4827
2.412	148.33	-79.268	924.5	-0.074707	0.74014	-1.7314	-73.898	-265.578	1280.326	-1.6746	0.8523	-1.053	6.386	166.5118	769.0229	-0.23266	0.63525	-0.79931	-133.031	-82.704	1669.5769	-1.3184	1.3379	-1.4414
2.414	152.726	-71.517	930.7974	-0.1625	0.80654	-1.7714	-52.844	-269.89	1333.284	-1.73	0.86768	-1.0972	-24.205	102.467	756.331	-0.21875	0.59961	-0.77148	-90.756	13.124	1614.77	-1.27	1.3066	-1.4161
2.416	125.957	-76.909	946.3456	-0.2375	0.8667	-1.7823	-29.439	-276.234	1339.761	-1.8086	0.87305	-1.1289	3.905	182.922	702.0753	-0.19385	0.5542	-0.73584	-49.2794	9.971	1596.556	-1.2284	1.2757	-1.3956
2.418	122.969	-75.399	969.559	-0.30391	0.89551	-1.7797	24.399	-289.608	1363.3966	-1.8574	0.875	-1.1484	16.318	194.2937	681.9315	-0.17725	0.53174	-0.7124	-7.517	65.522	1570.47	-1.1874	1.2464	-1.3749
2.42	134.911	-74.297	982.915	-0.37549	0.91064	-1.7827	53.8513	-248.931	1372.606	-1.9551	0.90234	-1.1777	2.833	147.509	670.331	-0.13916	0.47412	-0.6665	55.5855	69.6849	1533.4765	-1.1423	1.2116	-1.3529
2.422	113.135	-69.916	1008.167	-0.4294	0.89522	-1.7559	19.4506	-205.601	1409.911	-2.0163	0.93579	-1.1931	31.7783	189.776	592.5743	-0.11865	0.44702	-0.64819	29.775	122.6821	1487.5559	-1.0957	1.1719	-1.3359
2.424	116.125	-90.291	1025.63	-0.47265	0.86953	-1.7309	-7.201	-188.001	1505.4303	-2.0757	0.98291	-1.2163	8.0369	133.5545	575.327	-0.09082	0.41016	-0.62891	-2.282	194.967	1441.404	-1.0632	1.1247	-1.3089
2.426	111.802	-111.6624	1027.429	-0.50703	0.8164	-1.7043	-33.917	-152.1224	1563.761	-2.146	1.0786	-1.2593	11.093	194.749	513.6299	-0.056152	0.36621	-0.60352	-6.633	247.488	1393.435	-1.0304	1.0751	-1.2803
2.428	124.579	-113.491	1041.908	-0.53496	0.77754	-1.6935	-39.308	-154.399	1579.771	-2.1816	1.1387	-1.2871	14.839	202.557	472.472	-0.040039	0.34668	-0.58447	-47.321	270.094	1337.273	-1.0136	1.0341	-1.2535
2.43	102.614	-109.772	1044.15	-0.54443	0.73486	-1.6831	-49.686	-145.568	1615.074	-2.2441	1.251	-1.3379	11.033	148.4724	467.353	-0.0083008	0.30664	-0.54883	-44.5968	231.476	1331.586	-1.0018	0.99074	-1.2308
2.432	96.489	-99.135	1023.218	-0.55596	0.68896	-1.6766	-49.074	-84.154	1587.18807	-2.2858	1.3303	-1.3753	22.866	174.4014	399.395	0.017578	0.27392	-0.52734	-16.532	233.237	1290.6583	-0.98291	0.95166	-1.2085
2.434	90.346	-102.92	996.05	-0.54922	0.64493	-1.6683	-70.374967	-89.343	1567.614	-2.3242	1.4023	-1.4082	5.331	96.742	395.924	0.029297	0.25586	-0.51318	32.0654	174.539	1279.1521	-0.96338	0.91631	-1.1815
2.436	111.667	-87.566	980.398	-0.53359	0.59414	-1.6543	-66.5277	-86.669	1576.881	-2.3516	1.4727	-1.4453	2.9752	140.619	362.225	0.062012	0.22021	-0.49219	43.447	217.566	1195.433	-0.93818	0.88096	-1.1519
2.438	86.073	-87.797	978.524	-0.51787	0.56104	-1.6327	-76.9451	-85.0824	1572.611	-2.3516	1.499	-1.4531	-32.2847	160.651	344.801	0.076172	0.20117	-0.4668	49.671	202.646	1174.142	-0.90225	0.84814	-1.1245
2.44	59.078	-76.149	965.024	-0.50732	0.53955	-1.6206	-81.425	-123.722	1637.5985	-2.312	1.5317	-1.4575	-35.011	150.158	357.472	0.10693	0.1748	-0.44531	55.789	215.7889	1158.8801	-0.86348	0.80645	-1.0936
2.442	56.477	-59.969	950.702	-0.49483	0.51963	-1.6089	-30.0735	-104.557	1670.5527	-2.2646	1.5342	-1.4473	-38.819	194.253	296.7511	0.12134	0.15528	-0.42554	46.419	175.127	1124.189	-0.81982	0.771	-1.0581
2.444	53.827	-38.485	925.8893	-0.47304	0.50742	-1.5969	-36.282	-88.812	1678.363	-2.2031	1.5293	-1.4375	-57.835	127.785	287.0008	0.13037	0.14063	-0.41357	30.4341	145.272	1101.988	-0.78672	0.73769	-1.022
2.446	39.991	-19.724	919.942	-0.4418	0.50703	-1.5777	-66.4216	-81.979	1717.8151	-2.1152	1.5078	-1.4082	-47.7424	136.5383	262.5639	0.1582	0.089844	-0.36133	31.344	137.33	1040.907	-0.7459	0.69258	-0.98438
2.448	21.768	-12.668	917.17	-0.4083	0.50303	-1.5662	-78.2337	-53.903	1704.385	-2.0601	1.4849	-1.394	-53.2638	113.8286	276.466	0.16504	0.072266	-0.34229	4.5586	164.983	984.614	-0.70801	0.65156	-0.94102
2.45	60.782	-10.367	894.673	-0.37256	0.49268	-1.5522	-104.514	-48.0444	1672.346	-1.9746	1.4277	-1.3418	-79.237	88.61	293.001	0.16699	0.056152	-0.33887	-35.905	238.38438	921.812	-0.67139	0.6209	-0.8956
2.452	41.956	-25.135	891.314	-0.33692	0.4916	-1.5248	-98.651	-50.37766	1686.925	-1.9226	1.384	-1.3015	-42.2552	135.7037	228.938	0.17016	0.053222	-0.33081	-72.405	271.74	847.316	-0.64697	0.5918	-0.87891
2.454	23.213	-36.009	876.406	-0.30967	0.49463	-1.505	-91.73	-27.567	1659.1002	-1.8784	1.3384	-1.2593	-52.9104	93.4931	210.61955	0.1709	0.052246	-0.31494	-49.995	311.198	759.031	-0.61025	0.56748	-0.83994
2.456	43.374	-53.635	866.031	-0.28857	0.49737	-1.4874	-107.705	-42.434	1647.5685	-1.8359	1.2891	-1.2109	-55.351	106.3963	178.0062	0.16553	0.063965	-0.29639	-31.0801	260.302	722.4484	-0.57022	0.53799	-0.8042
2.458	53.471	-64.882	858.402	-0.28008	0.50586	-1.4664	-73.036	-37.963	1629.952	-1.8203	1.2598	-1.1875	-51.778	107.957	159.25	0.16699	0.068848	-0.29883	-50.651	278.05	663.677	-0.53428	0.50752	-0.77529
2.46	48.943	-61.004	839.46	-0.26807	0.51514	-1.4409	-66.74833	-11.6665	1550.869	-1.7905	1.2778	-1.0786	-58.884	93.2346	168.105	0.16797	0.070801	-0.27686	-54.968	261.294	643.4236	-0.48379	0.47412	-0.73799
2.462	13.525	-61.679	829.829	-0.2538	0.52002	-1.4142	-80.624	-31.942	1510.564	-1.7846	1.1807	-1.1216	-54.3593	140.447	117.287	0.16602	0.055664	-0.26514	-36.8897	309.339	594.6984	-0.44141	0.44922	-0.70898
2.464	37.071	-64.009	805.951	-0.24043	0.51787	-1.3893	-50.318	-32.7889	1500.771	-1.7261	1.1567	-1.105	-37.1418	78.57497	136.8604	0.17188	0.05127	-0.24707	-27.4834	304.782	525.241	-0.40039	0.41621	-0.67656
2.466	43.536	-62.793	798.199	-0.22598	0.50693	-1.3519	-21.136	-20.5518	1472.922	-1.6563	1.1914	-1.0645	-46.0142	82.619	144.6333	0.16602	0.03418	-0.22949	-19.7965	275.819	450.401	-0.35732	0.38994	-0.64697
2.468	21.132	-38.472	787.198	-0.21612	0.51065	-1.3194	-44.251	8.778	1481.4637	-1.6406	1.2041	-1.0645	-43.454	68.2235	105.728	0.15478	0.038086	-0.2229	-16.376	233.241	401.76	-0.31319	0.35205	-0.60908
2.47	22.449	-23.117	783.975	-0.20605	0.50391	-1.2852	5.013	52.6853	1456.252	-1.5898	1.2109	-1.0537	-35.562	60.4496	97.8264	0.14453	0.041504	-0.21045	-41.447	199.744	382.372	-0.26875	0.321	-0.58652
2.472	24.589	-13.354	757.419	-0.1917	0.4914	-1.2473	15.914	60.337	1411.55	-1.5407	1.1897	-1.0261	8.589	126.649	59.4784	0.13525	0.041992	-0.19336	-53.2687	223.5097	366.621	-0.23047	0.28271	-0.56152
2.474	52.432	4.786	724.167	-0.17607	0.46875	-1.205	-49.907	47.337	1419.4566	-1.5078	1.1582	-0.99023	-4.98699999999999	74.045	74.04	0.13672	0.039551	-0.18408	-52.93735	223.15	382.7407	-0.18272	0.25185	-0.52978
2.476	23.663	19.458	698.68	-0.16358	0.44453	-1.1645	-31.307	64.81	1389.6691	-1.4746	1.1074	-0.96094	-5.268	88.348	85.63	0.1377	0.034668	-0.17822	-84.966	232.213	352.061	-0.1501	0.22754	-0.51963
2.478	40.8	30.566	688.873	-0.15586	0.43223	-1.126	-20.041	57.017	1365.3065	-1.4604	1.0864	-0.93896	5.207	52.021	43.351	0.13623	0.029053	-0.16479	-46.6406	176.569	324.1865	-0.11845	0.19043	-0.48916
2.48	48.504	23.172	658.756	-0.14111	0.41406	-1.084	-33.5874	60.671	1352.5645	-1.4233	1.0396	-0.90869	-6.596	-9.268	52.02884	0.12988	0.024414	-0.15625	-50.2313	173.577	264.624	-0.092578	0.14257	-0.44395
2.482	45.827	16.282	643.576	-0.13018	0.39726	-1.0424	-10.385	52.421	1292.6952	-1.3847	1.0049	-0.88623	14.01	32.966	26.099	0.12695	0.016113	-0.146	-5.028	149.262	230.213	-0.085449	0.12939	-0.42725
2.484	34.877	7.598	626.103	-0.12207	0.38496	-1.0104	-33.3669	20.65627	1260.631	-1.3354	0.96924	-0.85693	-26.734	-22.5918	45.3764	0.12988	0.010254	-0.14209	-3.521	180.891	220.74505	-0.092871	0.10508	-0.41748
2.486	13.675	0.917999999999999	606.882	-0.1084	0.37403	-0.97061	-28.5905	41.645	1245.154	-1.2734	0.92383	-0.82422	-17.273	22.166	28.472	0.12695	-0.020996	-0.12598	18.0888	158.5525	212.227	-0.10254	0.08711	-0.40068
2.488	25.135	-2.961	594.519	-0.10166	0.3625	-0.93496	-43.2514	59.472	1212.6298	-1.2417	0.90088	-0.80811	-6.557	41.434	-8.8893	0.12133	-0.042969	-0.11157	7.64	122.27093	168.623	-0.11855	0.067188	-0.38193
2.49	23.032	0.586000000000002	567.76	-0.098633	0.354	-0.90088	-34.957	77.54	1214.2766	-1.1851	0.85596	-0.771	-41.951	13.22491	18.0585	0.12158	-0.055176	-0.10205	59.338	108.778	138.6213	-0.1376	0.044629	-0.36055
2.492	12.128	-1.266	559.733	-0.084766	0.34444	-0.86602	1.612	124.633	1186.79623	-1.1406	0.82519	-0.74414	-32.1231	58.968	14.9903	0.11377	-0.063965	-0.10645	39.921	87.1732	115.3738	-0.15918	0.025391	-0.33252
2.494	-4.089	-1.973	547.481	-0.078809	0.32305	-0.83086	-5.482	141.7219	1126.6751	-1.0942	0.78955	-0.71094	-20.947	10.4815	50.531	0.11523	-0.069824	-0.10449	22.857	128.748	116.514	-0.18613	0.029492	-0.32442
2.496	28.539	-4.001	538.867	-0.069824	0.31328	-0.79532	-27.107	165.867	1134.445	-1.0503	0.75244	-0.67334	-39.4101	39.8506	46.209	0.11963	-0.094238	-0.088379	-22.587	120.655	107.034	-0.20879	0.034962	-0.31406
2.498	31.691	-2.886	529.731	-0.058399	0.30263	-0.76709	-36.7187	186.506	1088.047	-1.0205	0.72754	-0.6582	-30.511	57.6676	2.756	0.12134	-0.09668	-0.083984	-47.8305	113.137	55.24895	-0.22715	0.037696	-0.30039
2.5	-1.613	16.256	535.283	-0.045898	0.28906	-0.73633	-43.912	166.928	1044.342	-0.97998	0.68018	-0.62061	-41.7032	-10.56	39.22489	0.12451	-0.10449	-0.081055	-38.3925	52.954	53.9885	-0.23536	0.038868	-0.28935
2.502	15.464	25.125	518.303	-0.037891	0.27012	-0.70293	-44.2185	166.773	1025.644	-0.94483	0.64307	-0.58643	-43.651	37.1224	5.759	0.12549	-0.10205	-0.073242	-46.402	31.866	51.6224	-0.24121	0.04248	-0.28369
2.504	31.305	17.688	484.105	-0.026367	0.2541	-0.66953	-57.5229	164.4338	966.5354	-0.9082	0.60352	-0.56055	-47.2109	-1.461	9.944406	0.12988	-0.10107	-0.072266	-31.894	-11.8068	81.614	-0.23389	0.050488	-0.26055
2.506	32.261	26.985	453.262	-0.01543	0.24082	-0.64063	-60.407	146.9419	926.907	-0.86328	0.55566	-0.52393	-56.0523	37.42	-6.67894	0.12646	-0.10498	-0.068359	-30.428	6.114	51.586	-0.22745	0.047558	-0.25342
2.508	-9.803	28.789	466.445	-0.0050781	0.22432	-0.61172	-34.197	153.493	901.5826	-0.84131	0.52979	-0.50488	-40.5007	59.472	-26.71668	0.12573	-0.10767	-0.062988	-34.4649	-8.907	31.214	-0.22041	0.042874	-0.23468
2.51	12.288	34.4308	451.136	0.0019531	0.21729	-0.59668	-38.9465	152.4889942	839.443	-0.79883	0.47852	-0.47266	-73.9124	-10.2939	27.28981	0.12646	-0.1123	-0.070313	-56.93	-0.457000000000001	0.4197	-0.21006	0.038574	-0.22305
2.512	9.85599999999999	26.6106	428.953	0.0061524	0.2126	-0.58047	-36.26445	150.7277	823.7453	-0.75562	0.45044	-0.44117	-59.224	38.2742	25.606	0.12109	-0.11084	-0.062012	-19.4186	-5.48	15.834	-0.19824	0.032715	-0.21191
2.514	-0.813000000000002	25.5451	407.715	0.020605	0.20566	-0.55947	26.5576	158.3638	816.3295	-0.71826	0.41846	-0.41943	-43.405	4.0335	33.077	0.12646	-0.11475	-0.056641	-21.522	-14.61	19.6425	-0.18535	0.021191	-0.1956
2.516	-8.318	32.7073	396.414	0.02998	0.19199	-0.54112	19.48061	160.6847	763.180799	-0.67578	0.37695	-0.39941	-25.914	26.5468	31.1403	0.13428	-0.12988	-0.036621	-33.7903	11.882	-15.5614	-0.16884	0.0074971	-0.18084
2.518	16.337	41.441	408.143	0.041113	0.1919	-0.51983	-18.70711	158.631	762.227	-0.65234	0.35352	-0.38281	-11.441	57.407	18.993	0.14111	-0.1211	-0.051269	-47.8236	5.65	-0.739000000000001	-0.15006	-0.0096772	-0.16796
2.52	35.91	49.072	403.343	0.050781	0.19287	-0.51074	18.3061	165.8	740.4261	-0.6123	0.30713	-0.34961	-43.27281	3.5548	45	0.14258	-0.12598	-0.055176	-81.942	37.8008	-4.871	-0.12487	-0.01602	-0.16093
2.522	12.314	55.873	395.201	0.05957	0.18662	-0.49229	2.9375	163.742	696.9246	-0.58056	0.26562	-0.3164	-7.7	56.237	5.442	0.15137	-0.13623	-0.046387	-85.184	16.0609	-8.943	-0.09668	-0.033203	-0.14795
2.524	22.042	41.4179	392.587	0.06377	0.18184	-0.47763	-14.4157	162.9179	665.817	-0.56348	0.23193	-0.29639	-7.275	41.094	1.47	0.15771	-0.13818	-0.050293	-48.7137	57.9767	1.551	-0.062176	-0.056312	-0.13419
2.526	27.874	30.8395	382.462	0.062988	0.18223	-0.45927	37.066	173.307	606.86493	-0.53271	0.19531	-0.28662	-7.409	37.4908	20.8837	0.1626	-0.14258	-0.056152	-49.3525	66.317	8.2369	-0.032327	-0.070154	-0.12604
2.528	35.243	28.179	395.55	0.064649	0.1832	-0.44687	8.1859	157.519	568.214	-0.51758	0.17773	-0.28613	9.513	60.479	6.592	0.1648	-0.1394	-0.0625	-59.444	90.023	20.1402	5.9009e-05	-0.099737	-0.0949
2.53	25.494	31.8493	376.587	0.060059	0.17676	-0.4375	-9.065	147.762	557.937	-0.46875	0.1377	-0.27539	-24.939	3.8833	48.1907	0.16699	-0.13916	-0.071289	-18.5788	76.784	10.23	0.029505	-0.10735	-0.079667
2.532	32.236	30.761	365.139	0.057227	0.16787	-0.4167	32.6022	145.6111	519.203	-0.41455	0.11768	-0.25928	4.434	50.211	0.193999999999999	0.17383	-0.13135	-0.074707	-33.8668	78.331	-11.576	0.056641	-0.10889	-0.082031
2.534	25.409	28.389	352.346	0.052734	0.16025	-0.40049	10.6513	134.257	496.136	-0.39453	0.098633	-0.24316	11.865	30.6198	5.633	0.18408	-0.13428	-0.07373	10.369	74.689	9.713	0.08815	-0.1418	-0.04677
2.536	-0.0669999999999931	32.363	336.862	0.047266	0.16259	-0.39072	8.7301	118.732	474.34841	-0.36963	0.072754	-0.21826	1.649	20.3618	39.157	0.18994	-0.12598	-0.078613	28.26	31.2415	11.095	0.11591	-0.13429	-0.034167
2.538	6.765	37.941	358.983	0.038086	0.15693	-0.38311	8.915	111.85	432.9671	-0.35815	0.051514	-0.1958	-8.292	52.045	22.32797	0.19922	-0.12353	-0.086182	17.415	23.8683	31.0813	0.13843	-0.13891	-0.024719
2.54	9.374	36.641	352.961	0.02832	0.15918	-0.37402	-7.277	138.5919	405.281	-0.35693	0.049316	-0.19385	-7.072	11.5307	46.201	0.2041	-0.11621	-0.092285	6.11	-21.7179	20.443	0.17369	-0.16057	0.010293
2.542	18.609	33.728	360.869	0.020703	0.15703	-0.36191	4.962	166.034	393.2646	-0.34668	0.01709	-0.16406	-5.362	52.006	6.811	0.21143	-0.1084	-0.10107	19.416	4.0537	22.9493	0.20703	-0.1543	0.019043
2.544	-7.75700000000001	36.6672	342.435	0.016016	0.15918	-0.35664	-4.587	174.639	367.9504	-0.33594	0.011719	-0.15869	-27.5381	26.8149	30.2363	0.21143	-0.10742	-0.10889	7.495	5.988	68.708	0.23683	-0.15586	0.025793
2.546	-10.321	51.0547	344.325	0.0089844	0.16113	-0.34648	-15.1214	148.601	367.4313	-0.32373	-0.00048828	-0.14893	-16.991	12.73	66.354	0.21387	-0.10889	-0.1123	-10.7198	33.8809	84.513	0.26456	-0.15123	0.032652
2.548	7.644	65.523	345.772	0.00048828	0.16006	-0.33838	-39.5121	119.3745	343.5522	-0.30932	-0.0039063	-0.14282	-15.79	28.22507	35.038	0.21265	-0.10742	-0.11988	19.024	21.27769	84.153	0.29617	-0.14801	0.039856
2.55	4.933	73.301	333.6437	-0.0073242	0.1626	-0.32861	-55.396	109.4834	331.47	-0.29248	0.00048828	-0.14502	-34.117	-4.087	24.7105	0.21338	-0.097168	-0.12842	-9.677	18.3403	50.711	0.32541	-0.15214	0.038978
2.552	-13.961	53.762	339.464	-0.018555	0.16504	-0.32793	-36.2865	90.3972	336.6759	-0.25928	-0.011719	-0.12842	-22.528	36.154	10.9206	0.21094	-0.092773	-0.1416	-13.617	-4.85518	34.7226	0.35107	-0.15527	0.03418
2.554	-21.541	49.584	348.029	-0.028516	0.17383	-0.32539	-32.3091	80.099	293.8815	-0.24658	-0.003418	-0.12793	-58.4263	25.5259	22.9411	0.2168	-0.083496	-0.14404	-6.692	2.5664	31.265	0.37129	-0.15445	0.041856
2.556	4.497	51.506	345.489	-0.033984	0.18125	-0.32227	-37.2474	87.06203	264.8437	-0.22412	-0.0058594	-0.12939	-64.2758	15.8685	52.131	0.21387	-0.074219	-0.1582	12.226	2.142	48.989	0.38471	-0.15314	0.041709
2.558	-25.845	60.427	356.804	-0.043945	0.18867	-0.325	-32.9348	64.694	228.529	-0.20508	-0.0056153	-0.12598	-31.267	42.885	14.4037	0.21313	-0.066407	-0.17138	-13.822	-2.736	14.0812	0.39186	-0.16609	0.036544
2.56	-34.272	51.377	347.252	-0.044922	0.19922	-0.31836	-55.843	76.2919	199.037	-0.17969	-0.0087891	-0.12207	-61.2861	3.205	23.5858	0.20313	-0.056641	-0.18555	-18.1994	-3.076	-7.256	0.40451	-0.17489	0.031053
2.562	-31.265	37.532	342.946	-0.049316	0.20957	-0.31992	-46.502	77.6312	211.2838	-0.15234	-0.0029297	-0.12695	-60.4445	32.8889	15.6775	0.19092	-0.035156	-0.19824	-48.2808	-3.7328	-23.3687	0.41016	-0.17871	0.023438
2.564	-5.837	46.667	334.832	-0.05459	0.21855	-0.32344	-21.82012	67.39751	200.6372	-0.13867	-0.0043945	-0.12354	-49.3209	14.9056	29.2128	0.17627	-0.020996	-0.20313	-72.151	42.1577	-29.0478	0.4126	-0.16334	0.027541
2.566	-20.773	46.794	335.78	-0.054199	0.22168	-0.32265	-30.3887	74.9849	187.457	-0.11572	0.0024414	-0.13623	-49.983	20.318	38.503	0.14551	0.00097656	-0.22656	-34.53	37.42375	7.01973	0.40169	-0.15951	0.030259
2.568	-48.762	57.622	358.726	-0.052051	0.2293	-0.3209	-17.8161	81.3714	191.799	-0.093019	-0.0041503	-0.12891	-24.667	47.046	-0.475	0.11328	0.018555	-0.24488	-43.4166	52.47156	24.1432	0.39011	-0.15674	0.02188
2.57	-7.257	57.688	356.772	-0.052734	0.2334	-0.31836	-4.036	76.8915	165.6411	-0.078613	-0.0029297	-0.13086	-28.342	1.006	21.4366	0.086426	0.029297	-0.26416	-71.311	8.387	12.5427	0.37655	-0.15557	0.013204
2.572	6.273	63.41	347.578	-0.057324	0.24121	-0.31826	-33.5591	85.971	147.98	-0.058105	-0.010254	-0.12646	-38.6314	17.4349	27.9859	0.041992	0.037109	-0.30176	-60.466	0.332999999999998	4.848	0.36133	-0.15479	0.0024414
2.574	-3.973	78.908	348.954	-0.063769	0.24541	-0.3206	-16.4791	80.901	138.428	-0.050781	0	-0.13818	-27.3696	-3.8985	44.732	0.016602	0.046387	-0.3208	-58.631	-11.182	-1.026	0.34983	-0.15002	-0.0098525
2.576	-22.989	72.344	361.956	-0.069238	0.24619	-0.32373	-2.148	84.366	103.6169	-0.043457	0.0024414	-0.13623	-9.805	6.534	78.9745	-0.052734	0.067871	-0.35693	-61.0089	21.495	-19.116	0.33669	-0.14433	-0.019327
2.578	10.656	68.072	358.158	-0.071191	0.246	-0.32041	-3.246	72.069	98.2344	-0.025146	-0.0014648	-0.125	3.236	57.113	76.743	-0.1084	0.081298	-0.3833	-10.779	36.919	20.9092	0.32191	-0.1373	-0.034766
2.58	23.133	80.248	336.534	-0.074707	0.24561	-0.32178	28.6293	56.73	81.289	-0.017578	-0.0029297	-0.12256	11.424	17.1051	113.97632	-0.1709	0.092773	-0.41602	-45.49	37.6008	-5.981	0.30635	-0.12672	-0.051175
2.582	-12.449	80.004	337.8204	-0.080078	0.24111	-0.31983	6.359	52.5421	58.085	-0.0068359	-1.0408e-14	-0.12305	25.2884	44.532	162.4458	-0.25488	0.097168	-0.47266	-34.5513	43.5948	-6.7503	0.28906	-0.11768	-0.069824
2.584	-17.568	62.659	349.274	-0.079101	0.2372	-0.3208	-18.4462	41.5599	65.79	0.00097656	-0.0014648	-0.11572	19.3511	46.47623	200.549	-0.30566	0.10156	-0.51123	-31.5945	31.9491	-8.758	0.26222	-0.10602	-0.091576
2.586	3.758	55.198	354.831	-0.083789	0.23369	-0.32236	9.862	25.655	82.7102	0.015625	-0.0019531	-0.10791	40.203	57.191	334.156	-0.43311	0.12256	-0.59766	-19.08526	60.1634	12.337	0.24004	-0.10064	-0.11281
2.588	-0.267000000000003	64.883	346.9	-0.090527	0.22754	-0.32363	17.5157	37.2703	74.475	0.030762	-0.006836	-0.090576	55.902	94.291	454.45	-0.56519	0.14575	-0.66675	-12.277	47.789	45.224	0.21152	-0.090497	-0.13344
2.59	-17.906	65.583	353.376	-0.09668	0.22656	-0.3291	-9.0962	39.6774	69.492	0.052734	-0.019531	-0.071777	16.3396	56.0978	620.521	-0.73145	0.18896	-0.75391	2.979	72.299	53.3085	0.18669	-0.077922	-0.15531
2.592	-2.387	53.528	378.13	-0.10264	0.2292	-0.32685	17.4994	40.622	54.11	0.058105	-0.015625	-0.07373	85.769	75.2591	725.629	-0.99023	0.25098	-0.85547	2.635	47.901	34.9746	0.16797	-0.072266	-0.17822
2.594	17.631	59.352	380.062	-0.10664	0.22715	-0.33086	-8.925	52.711	45.3479	0.05957	-0.010254	-0.072754	109.759	57.571	792.679	-1.127	0.28418	-0.89453	-10.8279	40.6517	9.764	0.15539	-0.059975	-0.19578
2.596	16.72	72.55	360.218	-0.1086	0.22715	-0.33476	-30.67998	45.0921	62.016	0.085938	-0.031738	-0.043945	40.773	10.38985	919.451	-1.4155	0.43213	-1.0503	13.889	35.9968	31.85832	0.14074	-0.044442	-0.21256
2.598	1.121	67.092	371.952	-0.1085	0.22969	-0.34043	-15.611	32.4793	36.922	0.10107	-0.050293	-0.023682	46.062	23.839	964.849	-1.6313	0.59033	-1.1792	4.249	48.1477	55.542	0.13135	-0.033508	-0.23641
2.6	-8.63200000000001	69.715	374.05	-0.10938	0.22754	-0.34961	-25.4036	33.4219	27.1069	0.10889	-0.050293	-0.013184	25.365	-46.846	1047.288	-1.7222	0.69189	-1.2437	40.37504	54.403	63.436	0.11905	-0.027344	-0.25761
2.602	7.756	85.929	371.315	-0.11015	0.23203	-0.35195	-39.551	10.051	30.7915	0.11475	-0.0625	-0.0029297	44.554	-29.776	1059.915	-1.7769	0.9458	-1.3354	4.0332	25.7905	42.014	0.09668	-0.024414	-0.27197
2.604	-17.091	99.499	368.944	-0.11543	0.23262	-0.36152	-28.7662	12.883	22.6794	0.12061	-0.070801	0.0073242	39.847	-48.389	1070.765	-1.7514	1.1685	-1.4263	-4.54655	2.786	21.1898	0.082709	-0.016503	-0.3004
2.606	-15.457	86.601	383.116	-0.12011	0.23379	-0.37285	-24.0201	36.7304	31.787	0.11865	-0.078613	0.019043	-6.43272	-82.886	1144.221	-1.6782	1.3481	-1.5103	-7.945	-32.098	19.764	0.058391	-0.0081995	-0.32032
2.608	-30.257	75.85	402.222	-0.12813	0.2335	-0.37891	-40.29	27.0358	11.4551	0.12354	-0.092774	0.034668	-9.114	-40.4559	1166.8915	-1.4883	1.4434	-1.5742	-14.728	-17.601	55.445	0.031439	0.00039171	-0.34102
2.61	7.52	85.925	400.27	-0.13379	0.2373	-0.3877	-51.067	33.2867	-19.2248	0.12549	-0.10205	0.039551	-27.093	-63.334	1207.509	-1.3379	1.4063	-1.5664	-14.104	-14.3875	55.303	-0.0043014	0.012306	-0.35879
2.612	-15.815	90.045	401.754	-0.13985	0.24531	-0.4001	-41.22431	29.96474	-11.4884	0.13232	-0.12402	0.061523	-5.3617	-42.036	1229.3787	-0.96289	1.1758	-1.4414	-21.1653	8.9982	37.0376	-0.041016	0.024414	-0.38281
2.614	-22.606	98.985	403.946	-0.14306	0.25107	-0.41426	-38.90239	9.236	10.8561	0.13672	-0.12695	0.064941	21.9073	-61.969	1225.34	-0.72387	1.0168	-1.3825	-21.0765	-21.2684	29.208	-0.07822	0.041112	-0.40469
2.616	8.23999999999999	94.178	412.484	-0.15049	0.26045	-0.41973	-26.2053	18.7065	6.83	0.14063	-0.1416	0.064941	6.179	-91.15	1283.667	-0.52832	0.90576	-1.3628	-43.221	-0.41946	18.5259	-0.10566	0.061913	-0.4294
2.618	7.44	93.217	412.03	-0.15752	0.27041	-0.43867	-22.32323	7.981	33.3099	0.15161	-0.15527	0.07373	-15.223	8.484	1291.277	-0.35791	0.83008	-1.3672	-34.39246	4.3606	9.5995	-0.13379	0.081444	-0.44892
2.62	3.026	92.606	417.928	-0.16016	0.28174	-0.45215	-35.776	7.622	33.7662	0.16113	-0.17432	0.082031	-62.504	25.111	1332.3434	-0.31348	0.79688	-1.3672	-45.2182	29.1671	16.77743	-0.15918	0.10566	-0.47392
2.622	1.38699999999999	79.545	453.296	-0.16631	0.29541	-0.46739	-31.444	29.0526	19.862	0.17236	-0.18457	0.1001	-80.328	70.322	1330.5515	-0.24609	0.71973	-1.3496	-30.9029	41.273	1.358	-0.17285	0.12598	-0.49561
2.624	34.99	80.031	461.476	-0.17695	0.304	-0.4793	-1.8971	23.4855	23.1793	0.17432	-0.18701	0.099609	-74.212	38.989	1282.325	-0.22509	0.68213	-1.3409	-66.7206	27.088	-34.1618	-0.18691	0.1459	-0.51504
2.626	5.874	84.536	459.869	-0.18399	0.31377	-0.49141	-6.322	16.38054	3.5229	0.18115	-0.19238	0.090332	-74.883	-80.625	1305.9471	-0.229	0.6582	-1.334	-49.819	15.028	-25.3245	-0.19424	0.16182	-0.53789
2.628	-11.801	83.96	465.973	-0.19131	0.31894	-0.50049	-16.903	29.962	-5.3309	0.18774	-0.208	0.097168	-65.1455	-96.3338	1305.978	-0.24707	0.62549	-1.3257	-64.2578	5.652	-43.993	-0.20244	0.16963	-0.5543
2.63	9.22900000000001	77.478	474.433	-0.20215	0.32471	-0.51025	15.281	6.5839	19.6829	0.18896	-0.20996	0.094238	-77.618	-139.621	1363.3282	-0.2627	0.61768	-1.3179	-56.9395	43.1356	-0.069	-0.2084	0.17237	-0.5708
2.632	28.568	76.373	482.069	-0.20488	0.32832	-0.52227	2.464	9.407451	8.961	0.19482	-0.23584	0.091797	-83.897	-138.516	1355.4807	-0.31299	0.61133	-1.3203	-54.7244	48.308	18.68106	-0.20654	0.16895	-0.5835
2.634	24.636	84.057	481.145	-0.20625	0.33545	-0.53096	-8.9695	11.0382	-3.856	0.19922	-0.2417	0.088867	-29.073	-131.0505	1307.215	-0.37866	0.61303	-1.3279	-41.64	60.417	21.3043	-0.20508	0.1582	-0.61045
2.636	7.45	84.142	485.541	-0.20234	0.34443	-0.54306	34.7871	0.3226	14.797	0.20654	-0.25977	0.090332	-11.409	-182.345	1322.916	-0.4624	0.62744	-1.3472	-20.7085	37.482	22.522	-0.20323	0.14063	-0.63711
2.638	37.934	79.47	496.348	-0.19453	0.35313	-0.54961	-14.054	19.6748	16.683	0.20752	-0.27027	0.088623	13.397	-141.395	1307.353	-0.58887	0.64844	-1.3789	-30.989	17.6597	65.659	-0.21416	0.12109	-0.66914
2.64	42.944	81.016	502.024	-0.18555	0.3623	-0.54785	15.339	30.7805	26.829	0.20947	-0.26855	0.080566	35.871	-172.646	1374.093	-0.64404	0.67041	-1.4058	-15.23	8.293	127.623	-0.25498	0.10264	-0.70322
2.642	30.44	102.299	513.703	-0.17266	0.36768	-0.56396	48.246	22.372	27.79367	0.19727	-0.27539	0.067871	-17.134	-150.944	1454.789	-0.72998	0.74463	-1.4917	-8.733	37.430599	191.783	-0.33105	0.082031	-0.7417
2.644	40.716	97.015	524.432	-0.1623	0.37031	-0.56446	-28.301	37.038	3.4683	0.2002	-0.27881	0.070801	0.6994	-105.162	1443.004	-0.76246	0.81739	-1.5635	55.474	57.8443	278.963	-0.43711	0.048829	-0.78945
2.646	31.859	98.08	523.732	-0.14824	0.37422	-0.57149	-3.439	16.2458	15.6636	0.19141	-0.26709	0.057129	16.1201	-122.8099	1417.639	-0.771	0.89697	-1.6304	32.4388	42.963	421.657	-0.59404	0.0066401	-0.84639
2.648	39.304	95.778	534.422	-0.13447	0.37607	-0.57812	14.0002	10.9931	14.3135	0.17725	-0.25708	0.051758	10.02249	-62.382	1325.237	-0.75586	0.97754	-1.7305	55.0416	68.22	641.977	-0.82646	-0.016406	-0.92334
2.65	5.768	101.576	525.533	-0.12598	0.37695	-0.58154	-26.6215	23.295	-10.2461	0.17432	-0.24463	0.040039	-1.36111	-100.846	1285.915	-0.73438	1	-1.7773	52.8604	73.551	883.862	-1.1203	-0.020605	-0.98849
2.652	9.66199999999999	99.222	555.824	-0.10849	0.3751	-0.58623	-6.3301	9.5566	6.566	0.16992	-0.2251	0.026855	-21.364	-126.781	1321.207	-0.68506	1.0142	-1.8413	106.365	76.712	1143.811	-1.4712	0.01416	-1.0767
2.654	13.749	99.682	562.542	-0.096289	0.37764	-0.5956	-12.723	9.4379	9.217	0.17578	-0.21924	0.01709	26.9058	-84.896	1316.527	-0.64941	1.0097	-1.8848	112.201	61.5286	1377.8699	-1.8685	0.10068	-1.1966
2.656	38.472	98.369	549.819	-0.082226	0.38154	-0.60107	-48.1979	15.0811	26.5	0.17676	-0.20508	-0.0043945	42.461	-98.3628	1352.2527	-0.6377	1.0039	-1.9277	71.3354	50.418	1578.532	-2.2522	0.22754	-1.3092
2.658	6.40000000000001	93.816	564.19	-0.071386	0.38106	-0.61152	-14.4209	-9.0877	29.3006	0.18286	-0.1914	-0.020264	87.784	-27.851	1340.95	-0.63037	1.0151	-1.9722	109.292	-0.631	1667.3663	-2.5756	0.40489	-1.3858
2.66	3.565	95.684	578.101	-0.063965	0.38721	-0.62842	-24.10569	2.33218	18.3469	0.18652	-0.17627	-0.034668	102.444	-67.0586	1346.342	-0.63281	1.0234	-1.9902	82.5198	-46.434	1706.066	-2.8496	0.66641	-1.491
2.662	25.691	104.994	579.722	-0.059668	0.38926	-0.6415	-59.546	17.6504	10.86817	0.19238	-0.15332	-0.057617	58.773	-79.133	1361.8126	-0.6499	1.0474	-2.0151	72.662	-116.138	1724.673	-3.0073	1.0005	-1.5562
2.664	20.314	111.061	574.621	-0.053516	0.38838	-0.65664	-25.9514	9.6944	-5.0067	0.19141	-0.14404	-0.069824	77.076	-33.494	1353.5723	-0.66651	1.0761	-2.0249	71.571	-192.916	1712.55	-3.0041	1.3264	-1.5983
2.666	22.395	111.282	593.651	-0.055859	0.39463	-0.67695	-30.384	31.293	-8.0251	0.19678	-0.12109	-0.088867	52.046	-73.128	1393.195	-0.68359	1.1016	-2.0313	41.853	-256.103	1705.88	-2.8743	1.5488	-1.7149
2.668	-0.352999999999994	124.099	601.509	-0.053516	0.40273	-0.69804	-50.035	31.696	-0.621300000000001	0.19238	-0.10449	-0.11133	55.677	-22.1197	1400.343	-0.68945	1.1133	-2.0371	-44.6052	-285.14	1648.379	-2.477	1.6023	-1.8114
2.67	15.736	129.296	592.186	-0.059082	0.41016	-0.72266	-16.5244	21.9877	-3.5268	0.18799	-0.096191	-0.12451	54.4629	-39.352	1382.831	-0.69824	1.1172	-2.0352	-43.242	-272.5	1593.991	-1.7936	1.4333	-1.7389
2.672	1.498	134.729	598.016	-0.061621	0.42022	-0.74658	-23.1106	21.3915	14.0411	0.17285	-0.081055	-0.14893	19.971	-44.299	1382.4369	-0.70508	1.0986	-2.0234	-15.013	-289.68	1538.4428	-1.1201	1.1523	-1.6367
2.674	3.894	135.672	618.406	-0.063281	0.43271	-0.77022	-30.5502	8.911	26.77541	0.15796	-0.051757	-0.16285	63.338	-4.673	1336.866	-0.7063	1.0842	-2.0134	-33.899	-277.41	1478.8293	-0.65694	0.86446	-1.6355
2.676	7.252	128.795	637.599	-0.076172	0.44287	-0.7999	-21.91	22.934	15.5758	0.14453	-0.025879	-0.18359	66.816	-47.3172	1326.476	-0.70801	1.0527	-1.9941	-5.363	-259.179	1450.5767	-0.36455	0.66533	-1.6663
2.678	12.502	127.419	624.366	-0.090234	0.45694	-0.82285	-16.778447	43.566	11.8351	0.12891	0.0053711	-0.21094	38.0176	9.8661	1300.278	-0.71729	0.99854	-1.9644	-6.966	-162.264	1511.336	-0.24189	0.5751	-1.6866
2.68	35.146	135.781	615.782	-0.10254	0.4707	-0.85156	-6.046	33.635	7.6282	0.11377	0.023926	-0.2251	42.3312	-0.0198	1282.9589	-0.71729	0.979	-1.9507	-105.435	-90.96	1571.21556	-0.23936	0.56846	-1.6937
2.682	21.986	143.049	617.576	-0.11806	0.49297	-0.87637	-10.326	23.021	-11.9452	0.080078	0.052246	-0.2583	31.473	9.54	1290.418	-0.72021	0.92578	-1.9297	-165.417	-11.34	1561.421	-0.26318	0.58057	-1.6743
2.684	18.928	147.036	630.034	-0.13604	0.50947	-0.90049	-2.203	11.89917	-1.9812	0.043701	0.078369	-0.28027	40.811	69.802	1252.564	-0.71289	0.90136	-1.916	-130.158	-73.45	1512.936	-0.29677	0.5581	-1.6186
2.686	31.064	139.23	625.45	-0.15517	0.53213	-0.92158	4.887	-10.939	26.5836	-0.0024414	0.097656	-0.29639	46.279	50.12896	1270.5329	-0.69824	0.88086	-1.9063	-88.194	-119.845	1462.298	-0.35908	0.49463	-1.5757
2.688	29.412	154.832	624.789	-0.17549	0.55401	-0.94072	-2.242	-9.2017	35.688	-0.084473	0.10889	-0.31592	55.177	131.089	1235.9564	-0.65283	0.86475	-1.8921	-80.435	-215.3085	1486.524	-0.43369	0.42666	-1.5315
2.69	29.236	148.577	640.018	-0.19336	0.57373	-0.95752	15.5459	-17.6789	77.68	-0.13721	0.13135	-0.34326	44.343	128.825	1191.156	-0.63086	0.86035	-1.8809	-100.786	-233.914	1508.02	-0.51787	0.39463	-1.4876
2.692	20.795	146.284	654.848	-0.21201	0.58614	-0.96739	31.0566	-21.653	102.7546	-0.25391	0.15088	-0.38232	-13.8033	113.869	1199.3641	-0.57373	0.84619	-1.8628	-130.056	-293.857	1534.578	-0.59912	0.39111	-1.4634
2.694	35.1	153.816	652.132	-0.23126	0.59805	-0.98086	8.4648	5.56307	110.3664	-0.34912	0.17822	-0.41651	-18.50281	147.191	1187.0381	-0.52612	0.84253	-1.8386	-58.9441	-307.191	1543.144	-0.71221	0.41612	-1.4934
2.696	25.853	162.568	651.285	-0.24844	0.61406	-0.99532	29.256	3.3832	161.641	-0.46094	0.20068	-0.45508	-18.115	63.602	1196.896	-0.47656	0.83203	-1.8164	-3.869	-349.228	1548.5202	-0.83916	0.45986	-1.5519
2.698	35.157	173.421	665.546	-0.26289	0.62032	-1.0018	33.086	1.0576	183.247	-0.63525	0.20898	-0.50928	12.24	83.347	1136.897	-0.41992	0.81689	-1.771	-0.834	-361.3	1542.98	-0.9501	0.54072	-1.6096
2.7	22.058	173.844	655.327	-0.27783	0.62354	-1.0015	5.9599	36.125	246.41	-0.74854	0.22217	-0.5376	18.3661	82.888	1077.228	-0.39551	0.80957	-1.752	48.879	-352.85	1614.015	-1.0494	0.59941	-1.6986
2.702	24.969	171.973	636.931	-0.28466	0.63144	-1.0067	62.913	51.715	400.833	-1.021	0.23047	-0.61084	-12.4226	67.46	1074.0463	-0.36523	0.79492	-1.6953	53.681	-295.816	1705.9353	-1.1499	0.67041	-1.7827
2.704	17.239	171.612	642.281	-0.29463	0.63828	-1.0074	27.6276	68.592	547.622	-1.2908	0.27197	-0.68384	-12.0002	114.1341	1044.976	-0.3523	0.78028	-1.6509	18.62	-224.1132	1805.671	-1.2867	0.79306	-1.9133
2.706	20.704	174.067	657.229	-0.29619	0.63906	-1.0043	3.6554	70.52	682.755	-1.5586	0.31787	-0.74414	-24.223	72.786	1068.2963	-0.34424	0.76172	-1.6016	55.0525	-148.838	1809.065	-1.4026	0.91827	-2.0288
2.708	15.495	177.714	648.608	-0.29941	0.63711	-1.0031	75.46	38.259	831.07	-1.9355	0.41992	-0.83398	-10.487	116.309	1044.252	-0.3457	0.73633	-1.541	89.5394	-97.212	1731.569	-1.4671	0.98506	-2.1011
2.71	13.72	176.748	640.21	-0.29541	0.63281	-0.99707	53.764	43.221	943.897	-2.1152	0.48633	-0.87891	28.2911	117.4799	988.33214	-0.34082	0.7251	-1.5044	95.515	-71.384	1638.145	-1.4662	0.96621	-2.1189
2.712	17.507	176.476	655.416	-0.29365	0.61845	-0.99053	21.6439	40.48	1041.0751	-2.396	0.65674	-0.94873	1.162	109.4913	983.481	-0.34033	0.69385	-1.4409	79.979	-38.463	1590.093	-1.4585	0.94775	-2.1284
2.714	1.248	186.528	659.09	-0.29474	0.59998	-0.98417	44.7364	15.616	1078.087	-2.5339	0.83911	-0.99877	-27.659	177.667	918.0728	-0.33618	0.67944	-1.3962	85.686	-28.121	1629.116	-1.4704	0.94991	-2.1671
2.716	8.21400000000001	185.327	658.394	-0.30333	0.57419	-0.98183	2.6171	8.402	1062.779	-2.6563	1.0508	-1.0859	-37.606	159.897	913.142	-0.33398	0.66016	-1.3496	103.192	-1.61699999999999	1638.24778	-1.4889	0.98604	-2.2058
2.718	-2.666	181.781	661.885	-0.31094	0.55477	-0.97803	11.2857	-22.291	1054.197	-2.6836	1.3262	-1.2422	-28.722	186.821	898.846	-0.32764	0.64014	-1.2944	134.795	-26.416	1645.707	-1.5077	1.0188	-2.2386
2.72	-6.17299999999999	182.735	651.102	-0.32275	0.53369	-0.97803	0.0302000000000007	-61.8719	1079.642	-2.5815	1.4048	-1.2974	-32.713	158.4724	839.6957	-0.32666	0.63379	-1.2646	165.229	-72.8211	1613.2672	-1.5053	1.1236	-2.2635
2.722	-10.768	182.274	650.788	-0.33183	0.52189	-0.98319	-39.031	-70.502	1103.697	-2.1445	1.3945	-1.3223	-42.7127	110.639	828.227	-0.31592	0.61816	-1.1953	138.936	-89.435	1609.7392	-1.5034	1.1958	-2.2856
2.724	-2.05	181.004	651.373	-0.33654	0.51211	-0.98399	-37.835	-84.8913	1159.856	-1.7449	1.2297	-1.2703	-37.414	142.3898	772.953	-0.31103	0.6062	-1.1462	118.958	-67.0936	1611.762	-1.4977	1.2098	-2.2641
2.726	18.888	175.893	640.269	-0.32758	0.51714	-0.98593	-4.8703	-87.347	1209.049	-1.4097	1.0591	-1.2437	-50.585	136.742	748.946	-0.31543	0.59326	-1.0898	90.528	-4.969	1636.057	-1.4772	1.18	-2.2238
2.728	-12.063	179.598	626.1	-0.31141	0.53139	-0.98916	-16.18838	-79.16178	1210.977	-1.0762	0.86523	-1.2461	-39.855	188.8027	707.3964	-0.31299	0.57471	-1.0249	61.6844	-17.79648	1619.818	-1.4226	1.0675	-2.1659
2.73	-0.655000000000001	174.08	625.261	-0.29199	0.55029	-0.98975	15.9868	-102.127	1229.945	-0.94189	0.78564	-1.2554	-36.708	173.943	661.43	-0.31104	0.56592	-0.98975	37.005	-46.182	1592.583	-1.3465	0.93281	-2.1035
2.732	11.392	180.033	609.931	-0.25968	0.57041	-0.99219	35.604	-64.334	1244.59	-0.75342	0.70654	-1.2866	-58.091	126.123	660.518	-0.30615	0.52588	-0.8999	23.532	-119.574	1559.316	-1.2573	0.81494	-2.0425
2.734	4.031	188.348	603.802	-0.23383	0.58698	-0.98483	-16.015	-9.98699999999999	1262.221	-0.6792	0.6997	-1.3145	-31.45	146.2094	626.3	-0.30713	0.50635	-0.8374	21.9102	-113.799	1527.568	-1.1616	0.73721	-1.987
2.736	-9.159	193.929	606.835	-0.20484	0.60209	-0.97426	-28.583	10.807	1311.973	-0.65283	0.70752	-1.333	-50.622	135.656	624.5509	-0.30225	0.4834	-0.78027	24.243	-76.781	1474.9352	-1.0929	0.69033	-1.9561
2.738	9.36	199.172	594.202	-0.17973	0.61147	-0.96282	-54.1398	17.099	1330.389	-0.69727	0.69336	-1.3535	-64.142	175.2727	614.602	-0.28467	0.46729	-0.70654	-20.2553	7.525	1411.3083	-1.037	0.67588	-1.9229
2.74	26.656	195.262	579.961	-0.15869	0.62109	-0.94531	-79.132	-27.808	1323.784	-0.72803	0.68604	-1.353	-15.494	180.248	577.218	-0.2727	0.44165	-0.64502	-34.0297	49.405	1317.128	-0.98194	0.66963	-1.887
2.742	-13.244	193.488	587.368	-0.13504	0.62496	-0.93287	-45.3435	-104.525	1299.136	-0.79395	0.66992	-1.3477	-48.4172	164.216	548.4316	-0.24854	0.4165	-0.57959	-35.748	59.534	1273.939	-0.93164	0.66016	-1.8418
2.744	9.301	183.881	595.208	-0.11756	0.62172	-0.92282	-35.4408	-158.233	1286.112	-0.8606	0.65552	-1.3474	-47.489	181.559	466.236	-0.21826	0.38916	-0.50928	-47.763	107.826	1265.311	-0.88057	0.6456	-1.7874
2.746	14.282	185.795	603.199	-0.099997	0.61141	-0.91151	-45.7626	-181.674	1332.6054	-0.9292	0.65088	-1.3511	-29.688	141.3506	453.26	-0.20459	0.36768	-0.47412	-36.483	144.1726	1226.048	-0.82764	0.62549	-1.7362
2.748	15.625	200.502	621.35	-0.09066	0.60061	-0.91697	-27.2491	-162.1647	1347.3729	-1.0493	0.65576	-1.3491	-34.292	149.4256	455.04507	-0.17725	0.32666	-0.40381	-34.8857	233.969	1194.892	-0.76748	0.60049	-1.6737
2.75	-11.759	213.134	637.88	-0.1001	0.58838	-0.92725	2.825	-159.7801	1357.7817	-1.1128	0.65771	-1.353	-38.61	138.402	438.5772	-0.15332	0.29273	-0.35523	-22.80123	270.721	1118.317	-0.7083	0.58037	-1.6161
2.752	0.142000000000003	216.895	663.77	-0.13282	0.57736	-0.942	29.6859	-186.678	1401.102	-1.2378	0.66846	-1.355	-41.7583	122.895	438.9263	-0.13232	0.27295	-0.31787	-74.902	274.242	1079.068	-0.66504	0.56787	-1.5488
2.754	-2.88500000000001	223.45	699.63	-0.19727	0.57175	-0.97225	46.998	-207.689	1416.725	-1.3511	0.71485	-1.3804	-22.789	138.683	368.744	-0.10889	0.22852	-0.25586	-42.228	234.757	1046.215	-0.63535	0.56504	-1.4842
2.756	21.489	235.126	746.71	-0.27212	0.57738	-1.0012	20.9874	-206.483	1450.57798	-1.4663	0.78662	-1.4253	-25.142	117.658	339.443	-0.096191	0.20801	-0.22021	-38.4274	198.172	1041.511	-0.62217	0.5706	-1.4139
2.758	34.961	244.412	822.39	-0.33746	0.59434	-1.0366	11.8325	-163.903	1467.6034	-1.5796	0.86572	-1.4819	-25.726	139.7303	337.645	-0.068359	0.18457	-0.17725	-7.518	189.157	1033.0796	-0.61435	0.5749	-1.3409
2.76	19.005	243.275	876.74	-0.39551	0.62305	-1.0703	-24.7	-96.2702	1450.759	-1.6187	0.89893	-1.5093	-29.345	155.901	321.7568	-0.045898	0.14062	-0.11816	-26.985	195.057	988.95274	-0.60439	0.58877	-1.272
2.762	28.0212	235.349	925.83	-0.43601	0.6482	-1.1086	-12.873	-68.903	1447.506	-1.6758	0.94824	-1.5742	-36.418	153.553	330.487	-0.020996	0.12891	-0.09668	-25.8477	188.033	929.119	-0.60547	0.5791	-1.2129
2.764	30.2935	210.411	971.93	-0.47261	0.68257	-1.1368	46.9517	-76.76	1425.217	-1.7058	0.9768	-1.6218	-6.895	168.115	297.2177	0.012207	0.11914	-0.079102	-65.566	188.812	888.761	-0.59746	0.56582	-1.1449
2.766	20.2417	175.14	1033.95	-0.50882	0.71708	-1.1733	17.6098	-102.303	1413.7991	-1.7402	0.99512	-1.6641	-23.032	124.882	296.8316	0.026367	0.11084	-0.063965	-35.094	175.52	895.857	-0.58672	0.55391	-1.064
2.768	15.921	149.20016	1075.08	-0.5463	0.7565	-1.2005	12.2821	-143.349	1435.877	-1.7866	1.0278	-1.7222	-30.71826	112.1916	301.407	0.0625	0.093262	-0.024414	-15.491	133.237	877.643	-0.57617	0.53008	-0.98711
2.77	15.903	119.238	1121.14	-0.60156	0.79883	-1.2266	57.253	-143.643	1429.858	-1.8008	1.0313	-1.7383	-19.435	113.032	277.0229	0.084229	0.082275	0.00048825	-10.455	128.153	843.74	-0.55205	0.49971	-0.90459
2.772	3.278	85.708	1144.58	-0.64583	0.83689	-1.2464	46.8247	-97.1455	1422.58	-1.8438	1.0371	-1.7734	-33.967	107.31	255.463	0.10059	0.084961	0.0083008	1.905	127.026	755.652	-0.52393	0.47314	-0.82373
2.774	-18.887	46.872	1158.79	-0.68019	0.8705	-1.2548	79.666	-58.9623	1446.636	-1.8581	1.051	-1.7966	-38.501	123.4379	211.1479	0.12549	0.07959	0.032227	-12.181	173.4028	691.499	-0.49278	0.44473	-0.7459
2.776	-0.747	9.682	1171.75	-0.68983	0.90625	-1.2486	108.044	-38.8013	1468.796	-1.8647	1.0454	-1.8022	-32.965	103.053	186.8818	0.12598	0.077148	0.050781	-43.9352	193.432	647.0416	-0.46982	0.42178	-0.66553
2.778	-7.875	-18.642	1163.69	-0.68311	0.93973	-1.2275	75.282	-67.41	1472.474	-1.8477	1.0254	-1.8086	-45.896	92.874581	173.3533	0.13379	0.084473	0.0625	-43.144	230.755	620.606	-0.44209	0.4042	-0.59952
2.78	-1.146	-40.251	1159.48	-0.64209	0.96729	-1.1987	65.759	-88.43	1524.753	-1.8198	1.0063	-1.8101	-19.451	93.274	147.3183	0.14184	0.085449	0.07666	-14.156	238.42	536.102	-0.40537	0.37481	-0.51269
2.782	-23.757	-72.092	1147.55	-0.57829	0.97538	-1.1514	61.965	-65.838	1519.013	-1.7554	0.95557	-1.8071	-30.31	85.1406	160.5972	0.14355	0.094238	0.092285	-42.9112	209.37	500.171	-0.37109	0.33887	-0.44043
2.784	-17.031	-90.638	1144.19	-0.49822	0.9656	-1.0945	32.753	-57.2364	1521.371	-1.6899	0.91943	-1.7944	-21.156	80.2024	151.8253	0.15625	0.11084	0.10742	-25.649	193.07705	435.1936	-0.33994	0.3083	-0.37197
2.786	-8.804	-95.374	1102.88	-0.41623	0.92965	-1.0294	63.7712	-40.4856	1514.908	-1.6211	0.88281	-1.7813	-52.3714	74.2853	132.6215	0.1665	0.10938	0.11865	-69.246	187.115	403.764	-0.31992	0.28565	-0.32266
2.788	-35.163	-78.296	1074.08	-0.35088	0.89172	-0.97765	63.614	-28.897	1448.4064	-1.5313	0.8418	-1.7656	-64.6414	87.513	150.704	0.18408	0.1167	0.12939	-38.3906	196.0329	392.0309	-0.28828	0.24619	-0.25234
2.79	-16.298	-80.166	1043.13	-0.3042	0.83936	-0.92139	35.7994	-47.19	1435.456	-1.502	0.82227	-1.7441	-35.45	98.848	115.4828	0.19995	0.11401	0.14063	-46.601	173.4906	334.962	-0.25781	0.20645	-0.1915
2.792	-51.282	-87.978	1016.639	-0.28428	0.79818	-0.87884	99.062	-51.083	1416.463	-1.4473	0.79688	-1.7148	-35.868	86.7195	104.82	0.21777	0.1084	0.15137	-35.161	143.383	288.839	-0.24463	0.18799	-0.16113
2.794	-41.573	-91.189	991.299	-0.28816	0.76144	-0.84525	79.745	-41.5087	1400.5246	-1.4126	0.77491	-1.6968	-36.388	93.073	74.1377	0.22998	0.099121	0.16992	-55.5977	95.101	237.589	-0.21523	0.13945	-0.10361
2.796	-95.1531	-97.248	983.872	-0.31238	0.73645	-0.81321	51.9609	-16.7292	1393.5835	-1.3843	0.75049	-1.6616	-52.55836	82.612	30.316	0.23438	0.088867	0.16943	-68.33	99.226	226.436	-0.19326	0.12373	-0.065528
2.798	-84.113	-100.924	983.435	-0.34481	0.71612	-0.79385	68.2495	-2.187	1348.681	-1.3438	0.72021	-1.6445	-39.8907	65.727	35.378	0.24121	0.070313	0.1875	-79.0268	135.5461	236.6	-0.17646	0.10381	-0.042871
2.8	-81.4	-112.578	976.143	-0.37842	0.70557	-0.78369	64.753	16.636	1317.3	-1.3188	0.71338	-1.6206	-25.317	52.7219	35.162	0.25122	0.059814	0.18359	-69.57	157.5737	249.2463	-0.15088	0.077051	0.0030275
2.802	-88.8	-137.992	965.056	-0.40938	0.70723	-0.78301	43.105	49.9151	1306.243	-1.2632	0.69189	-1.5806	-56.3339	21.79	63.28131	0.26123	0.037598	0.19531	-44.0441	165.3253	211.4098	-0.13379	0.069824	0.021484
2.804	-80.205	-155.865	947.981	-0.43437	0.7127	-0.78712	65.865	69.8977	1283.4198	-1.2234	0.67798	-1.5505	-20.239	21.938	59.2241	0.26172	0.020508	0.19775	-71.806	112.2121	160.826	-0.129	0.060742	0.045801
2.806	-100.2322	-197.265	953.8048	-0.44493	0.73146	-0.80117	29.8313	106.036	1263.2372	-1.1929	0.66748	-1.521	-19.735	35.19274	36.3509	0.26611	0.0068359	0.1958	-34.14769	105.4063	112.243	-0.1208	0.067383	0.051856
2.808	-81.7302	-215.0579	948.775	-0.45527	0.76114	-0.82109	6.711	111.622	1240.7393	-1.1582	0.6543	-1.4766	-36.3358	50.321	27.3377	0.25977	0.00097656	0.1875	-62.1089	104.8981	111.533	-0.10166	0.054883	0.088965
2.81	-107.6831	-246.258	956.228	-0.45801	0.7959	-0.84375	9.7663	95.527	1233.1316	-1.1316	0.64966	-1.4421	-14.648	64.412	16.126	0.2561	0.0046386	0.17798	-21.411	140.6597	154.0312	-0.089843	0.056738	0.10528
2.812	-101.061	-269.666	953.236	-0.45986	0.84463	-0.86553	6.4699	67.121	1227.345	-1.1118	0.64502	-1.4019	-28.973	55.82	40.4988	0.25293	0.016113	0.1709	-38.791	145.885	131.16949	-0.083984	0.066406	0.11914
2.814	-108.856	-298.463	954.864	-0.46006	0.87851	-0.87569	12.35386	49.3011	1202.822	-1.0898	0.62891	-1.3574	-35.369	34.34274	31.2046	0.25439	0.030762	0.16406	-18.0721	125.668	91.3865	-0.072168	0.087012	0.12324
2.816	-115.96	-297.356	956.585	-0.45147	0.93242	-0.89365	21.62673	45.384	1146.04	-1.0703	0.62695	-1.332	-28.162	26.6763	14.048	0.25195	0.037598	0.16064	2.4174	101.465	19.237	-0.062891	0.11055	0.12939
2.818	-102.944	-274.502	953.67	-0.45	0.97382	-0.91211	11.0209	46.684	1120.832	-1.0366	0.60986	-1.269	-5.161	2.417	40.9316	0.25488	0.060547	0.15527	-10.261	101.871	19.539	-0.042188	0.11172	0.15557
2.82	-129.006	-252.638	961.2798	-0.4541	1.0156	-0.9375	1.4679	54.988	1120.0427	-1.0081	0.59839	-1.2273	-18.012	15.4519	14.296	0.26025	0.078857	0.14575	-6.107	115.339	53.177	-0.028711	0.12461	0.16914
2.822	-131.2605	-227.5279	973.2313	-0.46709	1.0546	-0.95948	-2.11	85.009	1099.2351	-0.96924	0.59375	-1.1719	-17.128	32.8556	27.25238	0.26611	0.094238	0.13965	-8.471	90.971	92.041	-0.02002	0.15186	0.16748
2.824	-136.8265	-203.873	996.3401	-0.48838	1.0907	-0.98623	20.563	102.4827	1094.655	-0.92822	0.58447	-1.1265	-18.033	45.416	11.6302	0.27783	0.11768	0.14063	18.254	56.246	64.392	-0.012305	0.17569	0.17461
2.826	-134.3065	-174.824	994.3603	-0.52041	1.1251	-1.0089	34.679	109.713	1060.894	-0.91748	0.55713	-1.1118	-18.8	48.331	-16.0498	0.2793	0.12646	0.13672	-4.5088	-9.6048	61.685	-0.0017578	0.19423	0.19033
2.828	-130.859	-154.988	1011.728	-0.54892	1.1624	-1.0325	4.999	139.313	1014.087	-0.87256	0.52979	-1.0542	-14.213	37.9173	17.3936	0.29004	0.13867	0.13818	13.1342	-11.1288	55.989	0.013086	0.21611	0.1997
2.83	-122.149	-143.723	1034.2007	-0.57471	1.1958	-1.0581	18.9228	159.3	987.6254	-0.83691	0.51416	-1.0073	-15.403	37.029	5.504	0.30371	0.14307	0.13965	-7.414	-16.5023	83.561	0.032715	0.2334	0.20928
2.832	-109.446	-134.462	1045.5663	-0.5915	1.2331	-1.0923	-13.9751	158.415	954.00289	-0.81738	0.50342	-0.96777	-50.2109	32.919	24.796	0.3125	0.14648	0.14453	7.505	16.3636	94.922	0.05957	0.25	0.21582
2.834	-127.0756	-133.35	1041.3929	-0.60586	1.2658	-1.1231	-48.903	162.828	925.28634	-0.78467	0.48779	-0.90186	-12.414	25.7693	46.98541	0.33252	0.13818	0.14307	-18.559	21.6881	55.702	0.086816	0.25215	0.22783
2.836	-84.916	-161.5918	1062.3921	-0.61172	1.2936	-1.1547	13.0248	138.539	907.398	-0.76221	0.47217	-0.8667	-29.252	34.7982	26.617	0.33984	0.13623	0.13916	-6.8695	1.5142	33.051	0.11572	0.26025	0.23477
2.838	-113.459	-187.324	1091.0368	-0.60439	1.3179	-1.1831	-1.247	126.0261	854.6782	-0.73193	0.4585	-0.81104	-44.5266	26.737	42.8481	0.35596	0.125	0.13672	-17.9082	-36.329	0.471	0.15439	0.26064	0.24531
2.84	-99.087	-185.085	1092.5535	-0.59131	1.3325	-1.2007	-26.45653	137.908	820.5697	-0.70727	0.44604	-0.76343	-23.482	38.745	33.4266	0.36207	0.11474	0.13428	-11.381	-51.6944	10.1226	0.18594	0.26592	0.25928
2.842	-104.383	-177.0923	1099.109	-0.56885	1.3401	-1.206	-5.9737	139.537	789.3523	-0.68164	0.43457	-0.7168	-22.243	49.641	21.0823	0.37012	0.10986	0.12988	-19.774	-23.2507	0.7849	0.22363	0.25928	0.27539
2.844	-97.236	-179.0658	1091.0814	-0.53691	1.3361	-1.1968	-38.1396	151.7212	761.0752	-0.6377	0.40723	-0.65234	-33.5496	30.553	30.438	0.37549	0.097656	0.12012	-52.8866	1.651	9.5117	0.26308	0.24951	0.29131
2.846	-98.79	-187.085	1098.9545	-0.49785	1.3126	-1.1796	-26.8741	143.7547	731.2194	-0.61377	0.39697	-0.61963	-24.372	34.3788	12.369	0.38135	0.094238	0.10938	-34.7415	42.5595	-22.7291	0.31377	0.22119	0.31563
2.848	-109.1099	-187.37	1091.67	-0.44912	1.2786	-1.1538	10.862	119.109	702.0737	-0.57129	0.36133	-0.54785	-33.22	23.126	20.5805	0.38379	0.090332	0.087891	-47.631	34.7492	-27.0395	0.35166	0.18721	0.33867
2.85	-101.8251	-173.681	1082.562	-0.40723	1.2324	-1.125	-11.375	128.429	675.3068	-0.53296	0.34814	-0.50585	-49.2032	14.93286	-1.252	0.38648	0.095215	0.065673	-49.3608	49.1177	-22.47226	0.38584	0.17148	0.32822
2.852	-105.217	-166.895	1080.262	-0.3791	1.1843	-1.09	-14.6416	131.8638	662.0341	-0.49219	0.32861	-0.45605	-27.775	20.818	12.399	0.3833	0.097656	0.039551	-56.7152	47.403	-3.572	0.41113	0.146	0.32324
2.854	-83.859	-138.8422	1067.5245	-0.36162	1.145	-1.0616	-10.024	151.702	647.572	-0.44922	0.30273	-0.41699	-26.9608	18.6539	41.2883	0.37646	0.11035	-0.0024414	-20.742	76.128	31.9498	0.42793	0.12041	0.32149
2.856	-104.74	-114.015	1032.0175	-0.34834	1.1146	-1.0436	-56.3571	186.687	618.211	-0.42383	0.28027	-0.37891	-13.841	26.508	21.1643	0.37549	0.11963	-0.026855	-81.181	68.533	-5.288	0.46094	0.06875	0.34004
2.858	-105.563	-95.759	1016.5797	-0.33398	1.0896	-1.0328	-27.6065	165.7867	591.83	-0.36426	0.24902	-0.3252	-33.8384	35.5531	62.85	0.36328	0.146	-0.070313	-51.266	48.0931	-32.3919	0.47148	0.044531	0.34551
2.86	-99.049	-101.975	998.601	-0.31592	1.0767	-1.0249	-3.211	137.26905	555.8302	-0.3169	0.22265	-0.2771	-28.357	40.149	30.037	0.35547	0.16992	-0.1084	-41.44728	19.2042	-38.9561	0.47656	0.012793	0.33613
2.862	-98.941	-88.577	979.222	-0.29092	1.0669	-1.0206	-41.8168	135.2617	499.275	-0.27197	0.2002	-0.24023	-24.721	38.4875	19.13374	0.34863	0.20166	-0.12988	-43.019	-7.555	-2.772	0.4751	0.018555	0.31348
2.864	-98.291	-87.112	958.912	-0.26045	1.0656	-1.0211	-26.0489	103.414	484.152	-0.22461	0.1875	-0.20947	-5.265	21.468748	36.019	0.33887	0.25049	-0.17041	-32.312	9.86	31.2048	0.47773	0.015723	0.28642
2.866	-111.5081	-86.987	948.964	-0.2292	1.066	-1.0129	-9.973	124.552	462.297	-0.19043	0.17578	-0.17529	-33.896	17.997	-2.015	0.33936	0.2793	-0.19043	-19.5156	25.8847	51.158	0.46953	0.015918	0.26758
2.868	-108.7486	-91.1384	931.751	-0.1961	1.0694	-1.0174	-33.3296	143.607	425.983	-0.14941	0.16016	-0.14111	-44.8987	12.469	9.4199	0.33301	0.32275	-0.22852	-21.6957	62.853	20.412	0.45898	0.027246	0.24648
2.87	-116.6545	-102.8857	900.692	-0.16504	1.0713	-1.0156	-6.35	125.77	387.0416	-0.12109	0.14917	-0.11157	4.605	3.86879	25.8253	0.32934	0.33862	-0.24781	-22.555	45.626	22.8325	0.43867	0.044824	0.22344
2.872	-102.799	-107.0743	886.92525	-0.14053	1.0656	-1.0051	-11.013	136.9243	360.804	-0.099609	0.14844	-0.10498	-24.3775	8.2729	27.0762	0.33496	0.37646	-0.28174	16.523	57.48	47.3517	0.4165	0.061523	0.20117
2.874	-98.334	-122.6599	884.6416	-0.12764	1.0614	-0.99639	-16.0633	133.243	372.4365	-0.065918	0.12598	-0.055176	-24.906	7.819	26.486	0.34277	0.42627	-0.34424	-14.242	33.566	68.651	0.38984	0.087402	0.18037
2.876	-95.284	-119.354	881.18096	-0.12022	1.0489	-0.98545	-9.99	135.1755	382.36445	-0.047363	0.13477	-0.04248	-5.943	28.5176	15.4155	0.3418	0.45752	-0.36572	26.157	54.397	72.92	0.36328	0.10225	0.15645
2.878	-79.814	-109.719	864.0785	-0.11425	1.0299	-0.97207	-3.2052	172.08	365.502	-0.030273	0.13281	-0.027344	-29.342	35.646	25.6385	0.34326	0.51172	-0.40918	10.176	21.9525	52.7694	0.34062	0.11905	0.1334
2.88	-86.294	-92.7552	856.6754	-0.11084	1.0103	-0.96143	-4.1871	134.227	332.4701	-0.014648	0.12622	-0.0048827	-18.639	30.9257	6.7019	0.32813	0.54639	-0.43701	-10.2932	17.71602	26.8798	0.32041	0.13604	0.11445
2.882	-85.03	-94.0133	845.0504	-0.10166	0.98418	-0.94785	-21.2586	106.8824	297.3854	0.0053711	0.12012	0.016113	-17.483	33.3507	18.96802	0.31592	0.55518	-0.45068	-19.3913	14.5627	28.113	0.30273	0.15332	0.091309
2.884	-87.524	-88.9708	826.3024	-0.091308	0.96025	-0.93545	-20.45	103.29467	285.297	0.016113	0.13086	0.018555	-21.241	17.8282	35.978	0.28955	0.58496	-0.50098	14.268	24.6363	40.865	0.28721	0.17119	0.070117
2.886	-69.199	-72.0121	793.5008	-0.083105	0.93681	-0.92451	-7.369	83.7094	255.141	0.03125	0.12988	0.032715	-19.144	34.4514	32.703	0.25049	0.60254	-0.5249	-19.242	40.802	15.8224	0.27021	0.19297	0.054297
2.888	-106.5013	-46.3466	763.3133	-0.070019	0.91123	-0.91084	-1.734	94.16256	248.3341	0.057617	0.12939	0.04834	-33.11556	53.071	92.215	0.19971	0.61475	-0.55811	-11.681	27.9145	37.255	0.25888	0.2043	0.032812
2.89	-80.66	-30.976	750.3197	-0.063477	0.87549	-0.90186	4.2087	93.8607	236.7242	0.064941	0.14477	0.042481	-49.5251	69.3709	115.784	0.097168	0.62012	-0.64844	1.3361	19.7794	8.9869	0.25137	0.21465	0.012305
2.892	-77.428	-31.694	721.0274	-0.05293	0.84619	-0.88193	-12.8842	64.6642	240.7156	0.079102	0.14795	0.042969	-43.715	94.74564	149.4	0.036133	0.61133	-0.70313	-26.574	-21.8772	7.58645	0.24463	0.22705	-0.0039063
2.894	-90.951	-17.925	690.13	-0.046387	0.81054	-0.86758	-19.1381	73.2118	206.682	0.10742	0.15088	0.045898	-41.567	102.5495	291.6811	-0.12012	0.60254	-0.81641	-2.14	-15.17999	38.721	0.23838	0.23643	-0.01875
2.896	-87.942	-9.153	680.8803	-0.038184	0.78086	-0.85117	19.3749	66.5161	186.56	0.11328	0.1543	0.044434	-77.414	116.673	433.491	-0.2832	0.58569	-0.90991	-35.331	-36.724	54.056	0.23613	0.24219	-0.033594
2.898	-77.5	-8.128	650.946	-0.034278	0.74854	-0.83623	-0.0489999999999995	59.0367	175.1305	0.13574	0.15723	0.044922	-102.074	111.0088	638.197	-0.48828	0.58691	-0.99902	-14.659	-16.717	43.557	0.23848	0.24453	-0.048437
2.9	-56.48	-13.376	648.626	-0.030273	0.72119	-0.82373	-26.3584	92.935	161.9132	0.14233	0.15869	0.031982	-79.974	97.328	829.141	-0.87256	0.62646	-1.1226	-45.2836	-18.6488	-12.3629	0.24785	0.24492	-0.058984
2.902	-78.982	-11.936	634.1591	-0.027344	0.69239	-0.80762	-6.4544	94.299	145.4473	0.15381	0.16406	0.035645	-102.868	63.434	963.433	-1.0879	0.67383	-1.1953	-28.8383	19.207	-35.076	0.25635	0.25049	-0.062012
2.904	-82.298	-14.385	627.6407	-0.025	0.66612	-0.78916	-10.7376	84.289	135.6639	0.16699	0.16699	0.032227	-128.2198	6.3484	1144.453	-1.5073	0.83643	-1.3413	-62.4449	21.251	-36.792	0.26348	0.25517	-0.07998
2.906	-79.778	-24.8691	627.84014	-0.024609	0.64736	-0.77823	-35.7613	114.563	114.575	0.17139	0.16553	0.032715	-86.901	-30.606	1220.114	-1.7566	1.0037	-1.407	-58.57491	34.447	8.3036	0.2711	0.26181	-0.099512
2.908	-75.259	-17.7452	584.76147	-0.026465	0.62617	-0.76094	-12.374	81.446	133.649	0.18115	0.16797	0.033691	-126.858	-80.321	1266.5843	-1.9038	1.186	-1.4429	-56.627	49.1987	4.61	0.26992	0.26611	-0.12646
2.91	-102.1228	-8.0018	560.3262	-0.031738	0.61572	-0.74902	-11.629	76.25	120.1333	0.18188	0.16895	0.028076	-113.707	-92.668	1272.472	-1.8901	1.4243	-1.5034	-51.022	24.0556	-5.0534	0.26055	0.27656	-0.15361
2.912	-105.5935	-7.9966	546.167648	-0.030469	0.59697	-0.72646	-12.6391	84.628	76.222	0.17969	0.16895	0.033691	-78.266	-105.992	1289.545	-1.7891	1.5215	-1.5352	-37.364	46.239	-32.25006	0.24121	0.28809	-0.18115
2.914	-75.786	-15.319	531.5599	-0.02998	0.57666	-0.71045	11.7042	58.0904	63.238	0.18018	0.16455	0.027344	-98.859	-92.32	1342.056	-1.437	1.6646	-1.5933	-26.175	31.811	-2.614	0.20899	0.30245	-0.21182
2.916	-83.293	8.7107	505.0116	-0.033887	0.55713	-0.68936	-24.9565	54.4824	56.821	0.17578	0.15967	0.025391	-87.347	-75.605	1322.3946	-1.1157	1.6792	-1.5688	-36.021	78.455	13.054	0.17734	0.32099	-0.23008
2.918	-87.813	4.3557	496.3011	-0.03457	0.53662	-0.67031	-27.20066	48.4379	44.019	0.17139	0.14551	0.031738	-80.532	-113.69	1354.425	-0.82324	1.5908	-1.4766	-48.723	58.89	37.52965	0.14453	0.35459	-0.25313
2.92	-76.148	3.73236	489.329	-0.033203	0.51855	-0.65039	-13.635	16.6853	50.5079	0.16895	0.14477	0.032226	-37.508	-181.202	1324.416	-0.5957	1.3535	-1.3105	-7.039	61.6893	27.6082	0.11836	0.38535	-0.26826
2.922	-73.764	9.0177	471.267	-0.03418	0.49014	-0.62549	-14.122	60.1867	46.4105	0.16016	0.13525	0.033691	5.532	-230.558	1326.277	-0.54443	1.2485	-1.2476	-28.575	34.1557	0.318999999999999	0.096191	0.41797	-0.28809
2.924	-90.1589	27.0568	438.0823	-0.038769	0.47373	-0.60361	-14.8506	57.31	38.9577	0.15234	0.11816	0.030273	74.928	-179.145	1357.16	-0.55957	1.0938	-1.1992	-15.3896	47.5629	9.823	0.077344	0.44893	-0.30263
2.926	-86.351	36.846	431.8304	-0.040723	0.44951	-0.58486	-20.07005	44.853	71.158	0.1416	0.10986	0.029297	64.45	-87.443	1339.7851	-0.6123	1.0102	-1.1802	-3.97	34.78	41.331	0.057129	0.48359	-0.32539
2.928	-67.015	30.2697	423.604	-0.041211	0.42715	-0.56308	-27.8243	61.223	66.6053	0.11816	0.087402	0.03418	0.1424	-53.89	1363.027	-0.6875	0.93945	-1.1582	-23.733	44.624	53.7377	0.050098	0.50078	-0.35118
2.93	-82.7419	35.2126	395.755	-0.042969	0.40234	-0.54443	-9.4686	29.1114	47.384	0.10693	0.07251	0.039551	-18.7894	-57.09	1318.0865	-0.81836	0.89258	-1.1348	-14.061	33.223	41.3774	0.039453	0.53174	-0.37881
2.932	-69.519	44.0483	377.763	-0.043262	0.38134	-0.52334	4.203	18.198	36.547	0.090332	0.063965	0.037598	-25.5507	-145.16	1308.005	-0.89258	0.88672	-1.1504	14.0252	-4.547	58.756	0.03418	0.54736	-0.39209
2.934	-87.7624	48.48	365.544	-0.042968	0.35547	-0.50332	-13.1119	35.9101	17.4593	0.065918	0.055664	0.035156	-4.075	-184.051	1374.6448	-0.99219	0.89941	-1.2148	12.7935	12.78849	33.7712	0.03252	0.56113	-0.39902
2.936	-72.522	51.107	370.7262	-0.047266	0.33086	-0.48222	-10.923	9.246	5.8733	0.060059	0.054688	0.036621	10.5954	-235.061	1383.947	-1.0334	0.91431	-1.2722	0.132999999999999	4.6092	64.554	0.024024	0.58555	-0.40586
2.938	-72.566	48.303	356.87884	-0.048438	0.31436	-0.46582	-7.81	29.66126	13.4495	0.045898	0.052734	0.041992	-20.6194	-305.849	1420.575	-1.0542	0.91846	-1.312	4.859	36.618	68.886	0.013867	0.61211	-0.40664
2.94	-62.301	40.4022	350.0149	-0.046387	0.2876	-0.44678	-4.24	46.512	-11.0681	0.042237	0.052735	0.039307	22.48327	-318.0862	1400.5	-1.0703	0.93164	-1.3691	-21.37	20.2666	66.957	-0.00087891	0.64736	-0.42744
2.942	-65.633	36.3304	344.0562	-0.047266	0.26826	-0.43437	-18.029	27.3229	-0.745699999999999	0.049316	0.058105	0.039551	44.8181	-374.974	1413.8732	-1.084	0.94727	-1.3965	20.782	18.2944	62.21355	-0.003418	0.66602	-0.43848
2.944	-56.274	31.53128	340.1551	-0.044531	0.24814	-0.4166	-13.5115	33.3686	17.4812	0.060547	0.062988	0.044434	76.166	-334.514	1424.4766	-1.1206	0.98291	-1.4478	-16.748	-33.0872	61.474	-0.0125	0.67158	-0.44404
2.946	-37.48	32.0247	329.75672	-0.039453	0.23408	-0.40371	4.1474	19.5352	12.3756	0.077149	0.06372	0.041504	130.636	-349.896	1419.475	-1.148	1.0063	-1.4722	-19.989	10.6414	102.6819	-0.038379	0.67198	-0.46533
2.948	-76.797	35.8087	322.2463	-0.037207	0.21182	-0.38994	-11.8178	0.873000000000001	20.6395	0.091797	0.062012	0.044434	64.4407	-385.692	1535.144	-1.1855	1.04	-1.4961	-34.07892	23.9087	162.6346	-0.079785	0.64463	-0.50752
2.95	-73.541	28.3674	315.6042	-0.032715	0.18896	-0.37451	-23.2685	28.79585	17.7921	0.11914	0.070313	0.04541	48.995	-330.577	1589.756	-1.2266	1.1074	-1.5313	-50.1054	31.2957	335.39	-0.14316	0.59668	-0.57754
2.952	-52.908	21.1323	293.7473	-0.032617	0.18194	-0.36601	-1.497	10.529	15.9843	0.12891	0.072266	0.043945	31.031	-354.727	1675.324	-1.2456	1.1606	-1.5581	-91.9649	29.2718	507.298	-0.25	0.56738	-0.68359
2.954	-54.893	24.5095	286.5644	-0.029004	0.16152	-0.35488	-7.361	3.366	26.8348	0.14893	0.07373	0.044434	-35.47	-263.338	1679.589	-1.2695	1.2617	-1.6074	-107.425	26.78	719.549	-0.42812	0.52969	-0.79649
2.956	-69.669	39.278	279.9319	-0.02627	0.14316	-0.33575	-9.127	27.0015	-3.706	0.16455	0.070068	0.045654	-55.147	-218.273	1595.372	-1.2749	1.3364	-1.6553	-19.097	50.3122	905.658	-0.6709	0.50527	-0.91289
2.958	-67.133	29.801	289.2277	-0.023633	0.12441	-0.31914	-2.4181	17.2103	0.0507999999999997	0.1709	0.069336	0.04248	-81.4039	-214.875	1599.1456	-1.2729	1.4194	-1.6948	-40.721	15.238	1123.956	-0.95879	0.49004	-1.0242
2.96	-66.698	35.6898	278.4027	-0.02002	0.11963	-0.31201	-21.2267	22.9505	18.8268	0.19189	0.063965	0.060547	-89.7419	-120.415	1551.732	-1.2734	1.5234	-1.752	-80.54301	31.082	1312.273	-1.2932	0.53759	-1.1331
2.962	-76.3544	39.31174	252.9257	-0.022754	0.096777	-0.2999	-16.4208	29.02918	16.9351	0.20166	0.060547	0.065918	-61.428	-139.678	1585.583	-1.2715	1.5703	-1.7852	-99.353	-38.348	1413.0409	-1.6499	0.68115	-1.2476
2.964	-67.684	45.3435	247.4005	-0.023535	0.085938	-0.28408	-7.457	-0.241099999999999	22.3659	0.2002	0.066406	0.066895	-28.7134	-70.124	1627.353	-1.2534	1.6704	-1.8335	-102.988	-60.036	1449.3481	-1.9237	0.84463	-1.2487
2.966	-69.3838	46.9168	248.604	-0.025098	0.075	-0.27822	-36.798	14.7478	11.112	0.20777	0.065674	0.05542	21.6926	-109.2889	1620.81	-1.2256	1.7383	-1.8525	-135.273	-78.46	1467.355	-2.1401	1.0801	-1.296
2.968	-59.93	48.2018	245.4208	-0.027636	0.057715	-0.25762	-29.3759	11.5372	-4.068	0.21143	0.067383	0.050293	-12.0482	-170.262	1674.652	-1.1855	1.7891	-1.8633	-50.14869	-56.8817	1470.066	-2.1885	1.2817	-1.3148
2.97	-58.92	56.4564	240.9617	-0.027832	0.044922	-0.24561	-0.582000000000001	0.5861	24.7895	0.20996	0.07959	0.036621	-1.919	-97.909	1654.855	-1.1152	1.834	-1.8643	-62.6638	-58.841	1498.54	-2.0783	1.4765	-1.322
2.972	-66.7633	49.6053	247.3424	-0.031934	0.045117	-0.24365	-33.2192	35.395	16.3387	0.20947	0.086914	0.029785	-26.466	-108.964	1691.0763	-1.0703	1.8398	-1.8535	-105.953	-49.401	1497.8889	-1.8667	1.6021	-1.3276
2.974	-62.088	32.30119	250.5681	-0.034082	0.039941	-0.24092	-9.8815	39.9998	11.112	0.21924	0.12012	0.021973	-24.254	-5.91	1676.986	-0.97852	1.8105	-1.8105	-76.183	-135.3128	1438.948	-1.6306	1.6644	-1.4122
2.976	-58.844	35.091	242.6368	-0.030566	0.03252	-0.23428	-3.2763	25.05	16.7268	0.2207	0.14136	0.018799	-67.248	-41.557	1663.8225	-0.91967	1.7551	-1.759	43.2918	-227.871	1389.233	-1.3228	1.6212	-1.437
2.978	-65.286	32.4612	242.65105	-0.031445	0.016504	-0.22187	-32.4724	37.39	8.9523	0.22412	0.15283	0.0092773	-91.267	-103.406	1709.276	-0.87402	1.6797	-1.7012	76.702	-215.16	1401.305	-1.0169	1.5005	-1.353
2.98	-77.9117	42.6775	238.529	-0.037109	0.01416	-0.21191	-6.6452	11.1757	14.0486	0.21289	0.17041	-0.0092773	-52.194	-106.7271	1691.6709	-0.83789	1.5879	-1.6387	62.331	-151.088	1500.011	-0.81357	1.3364	-1.2347
2.982	-49.768	42.4336	240.0608	-0.037793	0.014746	-0.21513	-7.304	3.31498	20.5842	0.20166	0.18408	-0.015137	-43.75	-154.224	1713.916	-0.8208	1.5552	-1.6147	16.69	-64.04	1518.8698	-0.75244	1.1558	-1.1675
2.984	-51.5	49.7023	230.2713	-0.044043	0.011621	-0.21133	-20.5695	23.3381	10.9284	0.17822	0.21289	-0.037109	-36.679	-73.845	1657.705	-0.77832	1.5117	-1.5762	-33.0092	-75.36	1488.4713	-0.81045	1.0278	-1.1507
2.986	-59.813	40.5581	232.4793	-0.046387	0.0049804	-0.20234	-12.6455	-3.39562	11.0548	0.16406	0.23902	-0.057862	-8.064	-80.72	1563.43	-0.73804	1.4904	-1.5564	0.186	-111.39	1463.3951	-0.93554	0.93867	-1.134
2.988	-54.648	45.677174	242.34078	-0.04834	0.0072265	-0.20293	-6.2	2.737	12.5228	0.15137	0.26807	-0.069336	-17.135	-43.6128	1534.797	-0.69482	1.479	-1.5386	45.698	-199.45	1505.5257	-1.1105	0.8918	-1.1176
2.99	-44.703	42.4443	251.0308	-0.052734	0.0073242	-0.21582	-20.6351	18.3418	-2.353	0.13574	0.29883	-0.095703	6.587	14.289	1452.055	-0.64941	1.4785	-1.5195	37.045	-196.981	1558.058	-1.2669	0.88975	-1.1317
2.992	-49.124	55.3118	257.2445	-0.056933	0.0072266	-0.20762	-9.857	0.9684	19.0096	0.13037	0.31494	-0.10791	26.661	-10.461571	1474.3314	-0.63086	1.4746	-1.5059	-11.8723	-222.532	1540.655	-1.3711	0.8877	-1.1738
2.994	-42.937	55.3568	252.5286	-0.06377	0.0077147	-0.20713	-6.195	25.1212	9.574	0.11621	0.34961	-0.13867	67.5242	69.041	1431.6715	-0.60547	1.459	-1.4824	22.76911	-238.763	1544.516	-1.4289	0.91621	-1.2324
2.996	-38.214	48.448	266.1588	-0.065723	0.012402	-0.2083	-9.8362	20.1097	5.1961	0.10987	0.37646	-0.16162	31.0256	26.274	1390.216	-0.59522	1.437	-1.4585	2.188	-318.2023	1559.1637	-1.4344	0.96094	-1.2781
2.998	-39.37	45.2156	243.1158	-0.069727	0.019141	-0.2126	-10.1591	3.1918	24.6374	0.10352	0.39844	-0.19336	25.602	79.685	1383.3291	-0.5835	1.4087	-1.4351	88.35	-359.595	1582.08	-1.4047	1.0516	-1.336
3	-50.848	51.9634	266.34053	-0.065918	0.031738	-0.21777	-8.15	19.1148	12.9496	0.10156	0.42236	-0.22217	-12.0742	113.592	1314.207	-0.58545	1.3735	-1.4058	153.611	-391.64	1592.7677	-1.382	1.1535	-1.4266
3.002	-63.359	49.4565	262.4721	-0.070996	0.041211	-0.22188	-3.7493	13.4098	-11.5829	0.095703	0.43408	-0.23975	-31.543	96.284	1326.8837	-0.58984	1.3496	-1.3867	132.968	-382.17	1636.119	-1.3672	1.2021	-1.4531
3.004	-64.074	56.212	262.427	-0.071289	0.050879	-0.22422	-3.857	19.9702	13.74822	0.076172	0.44775	-0.27686	9.63	127.305	1289.715	-0.58838	1.3228	-1.3511	65.038	-354.822	1720.962	-1.3958	1.1889	-1.4571
3.006	-53.139	58.6384	273.889	-0.071679	0.056738	-0.23086	-15.043	55.019	6.759	0.048096	0.45069	-0.30786	0.862000000000002	44.4844	1291.1858	-0.58789	1.2984	-1.3267	43.2237	-280.008	1787.177	-1.4662	1.1679	-1.4773
3.008	-58.605	58.9656	285.2502	-0.073731	0.066309	-0.23613	-6.4857	15.7429	28.5893	0.0024414	0.45557	-0.3335	10.0603	64.246	1267.021	-0.57959	1.2739	-1.2964	25.0866	-217.535	1772.73	-1.5784	1.1723	-1.4989
3.01	-52.686	43.27007	307.81532	-0.071777	0.073242	-0.24512	-23.927	-11.203	54.55771	-0.083984	0.45605	-0.37598	9.166	29.4829	1211.133	-0.56787	1.2383	-1.2578	-44.3681	-188.693	1755.0839	-1.6935	1.2042	-1.5275
3.012	-48.637	42.968	320.0302	-0.07832	0.080566	-0.25391	-6.267	-0.105	60.097	-0.13867	0.45557	-0.40283	-16.81308	5.7	1223.119	-0.55811	1.2095	-1.231	-28.451	-139.19	1733.614	-1.8101	1.27	-1.5776
3.014	-63.22	50.1471	321.4065	-0.081543	0.085156	-0.24991	-4.786	-8.0008	141.8694	-0.26855	0.44971	-0.44873	-14.382	49.608	1165.676	-0.51709	1.1489	-1.189	-122.296	-109.11	1745.7159	-1.8886	1.3329	-1.6132
3.016	-76.0307	65.4769	322.7407	-0.094433	0.091406	-0.26435	-64.0319	0.9809	222.482	-0.40357	0.44409	-0.49195	11.312	28.764	1137.129	-0.47949	1.0801	-1.1348	-114.641	-4.027	1737.0814	-1.9406	1.4141	-1.6624
3.018	-50.335	59.0626	347.2337	-0.11094	0.09834	-0.27578	-66.897	8.0724	280.291	-0.57813	0.45508	-0.56543	17.445	102.704	1082.392	-0.46533	1.0474	-1.1167	-71.803	34.159	1710.982	-1.9406	1.5017	-1.7124
3.02	-60.525	58.10998	352.0327	-0.12451	0.10645	-0.28955	-52.03	-0.381	385.326	-0.83301	0.46631	-0.61719	-10.5721	95.12	1037.9292	-0.42578	0.98633	-1.0684	-12.6906	18.6367	1713.583	-1.9192	1.585	-1.7618
3.022	-72.746	65.9621	345.582	-0.14356	0.11797	-0.29991	-64.052	46.3534	499.763	-0.9751	0.47217	-0.64209	-12.5507	126.18273	1057.16	-0.38623	0.94018	-1.0322	-59.65869	-24.54	1719.564	-1.8711	1.6836	-1.8125
3.024	-72.599	69.7175	354.3289	-0.1626	0.13594	-0.30879	-32.146	71.2721	679.0688	-1.291	0.52539	-0.70947	-37.3687	172.205	994.0593	-0.35352	0.90234	-0.99707	-51.705	-46.0197	1762.279	-1.8081	1.7645	-1.8272
3.026	-80.7301	82.0634	381.4267	-0.17705	0.15156	-0.32676	-24.763	56.2865	845.758	-1.5046	0.57055	-0.73999	-19.6262	158.796	976.791	-0.30566	0.84375	-0.95703	-43.166	9.976	1744.016	-1.7401	1.7981	-1.8195
3.028	-72.299	92.312	389.1403	-0.18769	0.1708	-0.34394	-58.4855	89.37	928.7427	-1.7202	0.64111	-0.78076	3.6574	221.829	900.2581	-0.2749	0.8125	-0.93555	-78.9966	46.4845	1763.4182	-1.6683	1.8091	-1.7632
3.03	-77.4145	92.566	401.7091	-0.19189	0.18945	-0.3623	-29.6622	83.552	1022.3026	-1.9355	0.76953	-0.81445	-5.3788	163.352	843.572	-0.22461	0.74854	-0.89404	-93.036	86.332	1740.329	-1.6033	1.7515	-1.6946
3.032	-74.517	84.1878	417.8013	-0.20352	0.21094	-0.37969	-76.4864	56.6699	1118.478	-1.998	0.8418	-0.81836	-27.1305	174.682	803.4842	-0.19702	0.69824	-0.85986	-140.055	35.00268	1711.294	-1.5449	1.6523	-1.6074
3.034	-84.0569	81.891	426.3008	-0.20781	0.23408	-0.39893	-92.4228	47.09	1185.368	-2.0737	0.98682	-0.87451	-5.90387	167.0858	737.093	-0.1665	0.65869	-0.8335	-113.378	-0.65255	1714.865	-1.4777	1.5553	-1.51
3.036	-47.92	86.7315	445.7601	-0.21132	0.26064	-0.4208	-69.526	-6.0062	1198.156	-2.0252	1.093	-0.91675	-1.69	141.1826	742.532	-0.14551	0.57959	-0.77881	-99.165	-53.509	1735.387	-1.4241	1.4501	-1.4374
3.038	-63.029	89.1875	456.2594	-0.21299	0.28457	-0.44004	-91.3727	-36.37513	1168.89	-1.9077	1.1978	-0.96533	28.4768	149.2912	683.418	-0.13428	0.55469	-0.75488	-91.667	-11.209	1715.833	-1.3678	1.3782	-1.3843
3.04	-69.261	74.6859	471.57686	-0.20801	0.30908	-0.45459	-79.207	-41.04251	1114.15	-1.6187	1.2661	-0.93896	13.6542	104.511	663.5631	-0.11865	0.50781	-0.72852	-54.637	11.3067	1652.3426	-1.3153	1.337	-1.3497
3.042	-67.598	75.4656	495.03651	-0.21709	0.33291	-0.46924	-53.964	-82.733	1103.164	-1.4644	1.2739	-0.90479	27.122	154.3362	624.288	-0.10425	0.46973	-0.69873	26.309	45.6481	1597.2771	-1.2598	1.3105	-1.332
3.044	-68.114	74.90485	492.1121	-0.21416	0.35781	-0.48496	-68.279	-72.398	1110.9371	-1.2476	1.2271	-0.84131	12.2905	157.229	568.735	-0.083496	0.4209	-0.65723	-14.1071	67.419	1543.472	-1.2065	1.2896	-1.3123
3.046	-80.688	69.6567	510.47838	-0.20557	0.37539	-0.50019	-25.2602	-66.661	1104.865	-1.1665	1.145	-0.81103	38.389	179.77859	592.449	-0.052246	0.37744	-0.62646	5.26	98.829265	1521.571	-1.1555	1.257	-1.2934
3.048	-86.12	75.06	530.3014	-0.20068	0.39804	-0.51318	0.222899999999999	-104.88	1133.92	-1.1289	1.0488	-0.77881	17.51704	171.1765	542.4399	-0.038574	0.3623	-0.61963	61.1231	145.9025	1449.516	-1.1086	1.2149	-1.2738
3.05	-81.955	82.3294	535.718	-0.19189	0.42334	-0.52881	-19.5876	-135.695	1155.51	-1.1504	0.96191	-0.75781	6.237	103.1167	518.3309	-0.0053711	0.30957	-0.59619	54.4307	191.1429	1423.472	-1.0714	1.1728	-1.2472
3.052	-76.525	91.1587	537.3576	-0.1834	0.43867	-0.53262	-27.7209	-173.543	1171.797	-1.1938	0.94189	-0.75439	38.8236	137.71	477.8122	0.017334	0.2832	-0.57764	30.801	252.31	1364.849	-1.0376	1.1313	-1.2202
3.054	-69.386	92.1913	550.5677	-0.16885	0.45635	-0.53545	-20.252	-192.4154	1214.344	-1.3149	0.93604	-0.74658	1.689	129.8277	415.975	0.039063	0.24902	-0.55859	51.446	229.877	1352.48	-1.0032	1.0937	-1.1884
3.056	-66.257	93.7662	573.1489	-0.15557	0.46807	-0.54326	-42.984	-153.827	1230.444	-1.4072	0.9497	-0.7583	22.229	170.218	397.104	0.063477	0.20654	-0.52979	21.116	248.62	1291.073	-0.96797	1.059	-1.1586
3.058	-71.374	91.1798	587.23626	-0.15283	0.48594	-0.55137	-39.257	-146.718	1260.2903	-1.4858	0.98486	-0.80225	31.372	153.089	342.635	0.077148	0.18701	-0.51367	10.0466	197.841	1259.446	-0.93047	1.0184	-1.1274
3.06	-68.488	95.1574	584.59073	-0.14893	0.49854	-0.55322	-36.532	-171.2	1281.951	-1.5737	1.0356	-0.88916	-13.444	134.769	334.9908	0.089355	0.16211	-0.5	54.871	199.433	1202.258	-0.89277	0.97539	-1.094
3.062	-79.441	104.3261	586.4493	-0.14512	0.51133	-0.56025	-58.512	-209.555	1262.474	-1.6011	1.0474	-0.92529	4.136	147.708	285.268	0.10157	0.14721	-0.48193	65.96	169.937	1142.423	-0.84912	0.93408	-1.0562
3.064	-73.055	96.0806	617.03468	-0.14082	0.51133	-0.55684	-23.755	-299.9481	1267.921	-1.6699	1.0664	-0.99512	-18.1636	119.4969	278.647	0.11182	0.12549	-0.46045	56.696	228.283	1120.9423	-0.81465	0.88857	-1.0257
3.066	-88.396	95.9496	621.3196	-0.13379	0.51992	-0.56621	-29.053	-351.973	1310.568	-1.7156	1.0569	-1.0417	-10.25	157.071	287.4609	0.12305	0.087891	-0.41602	33.343	242.916	1082.182	-0.77832	0.84726	-0.99691
3.068	-94.1092	94.2566	615.7949	-0.13437	0.52549	-0.57607	-56.447	-336.163	1356.3557	-1.7651	1.0366	-1.0757	-43.5463	106.416	247.28	0.12988	0.064941	-0.38477	5.6007	214.963	1065.6673	-0.73574	0.80547	-0.95898
3.07	-94.966	100.1043	612.6851	-0.13428	0.53564	-0.58398	-16.316	-331.867	1375.6618	-1.8438	1.0352	-1.1152	-46.765	119.186	252.395	0.11816	0.066406	-0.38135	11.0282	205.813	1002.2931	-0.69326	0.76065	-0.93389
3.072	-93.7892	105.928	639.2304	-0.13984	0.55459	-0.59677	22.723	-291.025	1374.747	-1.8906	1.0449	-1.1396	-47.6186	116.4057	202.54	0.10962	0.064697	-0.37915	28.949	179.765	953.253	-0.64502	0.70752	-0.90576
3.074	-85.496	105.4297	649.905	-0.14658	0.57334	-0.61299	43.5432	-242.1055	1408.842	-1.9785	1.1094	-1.1816	-71.3387	94.7271	213.585	0.104	0.042969	-0.36621	20.6842	229.596	905.611	-0.59756	0.6627	-0.86719
3.076	-96.2906	113.1632	644.3744	-0.15166	0.6003	-0.62978	28.1917	-239.607	1493.393	-2.0222	1.18	-1.2088	-49.1064	121.6939	221.966	0.10938	0.030273	-0.31201	-37.6271	237.029	878.411	-0.55918	0.62744	-0.83506
3.078	-69.746	106.5274	667.1493	-0.15215	0.62305	-0.65019	-28.589	-214.7202	1563.9531	-2.0781	1.2539	-1.2422	-79.101	59.5763	201.795	0.095215	0.016113	-0.30371	-21.7505	305.4644	809.7904	-0.53223	0.59463	-0.81318
3.08	-79.9948	106.21822	678.1763	-0.15332	0.65137	-0.67188	-50.6223	-205.1711	1622.888	-2.1265	1.356	-1.2925	-52.794	95.965	193.714	0.07959	-0.00048828	-0.30371	-35.428	286.522	740.516	-0.49658	0.57158	-0.78057
3.082	-69.147	108.4256	682.387663	-0.16035	0.67871	-0.696	-90.7481	-191.561	1642.823	-2.1609	1.4358	-1.3377	-29.1184	60.15	144.0283	0.074463	-0.0075682	-0.29126	9.8015	291.853	701.555	-0.45459	0.53418	-0.73828
3.084	-69.471	115.68662	690.9869	-0.16973	0.70752	-0.72061	-100.0881	-136.511	1629.2139	-2.1934	1.5039	-1.3794	-74.5809	41.9601	148.9186	0.074219	-0.00097656	-0.27002	12.2915	285.038	674.91	-0.4165	0.50283	-0.70459
3.086	-84.216	110.9357	694.4768	-0.18301	0.72939	-0.73818	-71.8956	-119.345	1620.727	-2.2065	1.5923	-1.4155	-42.066	59.184	93.419	0.064941	-0.014648	-0.26563	-27.0482	317.317	646.6236	-0.37822	0.47334	-0.67578
3.088	-84.7571	114.8217	698.7467	-0.19971	0.75772	-0.76611	-100.259	-125.764	1617.315	-2.209	1.6348	-1.4346	-54.3786	19.308	74.826	0.060547	-0.020996	-0.25586	-67.621	323.019	596.247	-0.3462	0.45381	-0.64531
3.09	-65.96	117.9722	696.0156	-0.21582	0.7793	-0.78711	-117.493	-133.12	1619.766	-2.1909	1.688	-1.4409	-36.171	73.8032	68.0108	0.063965	-0.014648	-0.22803	-64.761	291.96	547.846	-0.31299	0.42685	-0.61748
3.092	-76.781	115.8049	697.1971	-0.22901	0.8	-0.81406	-77.618	-178.268	1660.4117	-2.1748	1.7119	-1.4365	-46.4958	37.693	49.124	0.054687	-0.026612	-0.21704	-41.1181	253.1021	467.243	-0.27344	0.3877	-0.58008
3.094	-83.094	128.0039	695.2727	-0.2416	0.81836	-0.84434	-88.692	-179.69	1686.4699	-2.1563	1.7246	-1.418	-26.608	71.218	83.0283	0.057129	-0.037598	-0.20215	-15.746	178.378	442.8245	-0.246	0.36045	-0.55986
3.096	-66.119	135.305	703.5809	-0.25176	0.83515	-0.87051	-80.8567	-161.398	1702.0405	-2.1089	1.7173	-1.3687	-26.169	71.152	34.5729	0.051758	-0.043457	-0.18945	9.765	212.3894	385.708	-0.2249	0.33643	-0.54522
3.098	-65.403	143.7332	689.7952	-0.25273	0.84394	-0.89629	-32.761	-151.352	1724.378	-2.0835	1.6997	-1.3403	-37.983	56.038	46.4249	0.050781	-0.043457	-0.18018	-21.1071	208.7748	391.09652	-0.20888	0.31377	-0.53388
3.1	-59.344	140.2648	711.5226	-0.25781	0.85596	-0.92627	-74.8314	-137.073	1711.4101	-2.021	1.6372	-1.2827	12.934	93.526	34.699	0.053711	-0.056641	-0.14111	0.525700000000001	244.111	379.462	-0.17968	0.26524	-0.49883
3.102	-50.011	132.9546	724.7267	-0.25889	0.86787	-0.95889	-97.3	-124.08	1699.524	-1.9802	1.5881	-1.2322	-18.345	32.03895	27.8516	0.053223	-0.064941	-0.13647	-2.6666	187.5551	365.0866	-0.15967	0.21729	-0.46729
3.104	-62.771	135.84386	726.5092	-0.25537	0.87393	-0.99149	-82.668	-136.41	1713.246	-1.9429	1.5454	-1.1929	-5.183	55.1203	20.7849	0.063965	-0.066406	-0.125	25.191	170.77593	315.4154	-0.1543	0.18457	-0.46152
3.106	-47.353	144.0664	710.4107	-0.25146	0.87939	-1.0228	-125.95	-108.9369	1695.798	-1.8984	1.4961	-1.1465	0.414999999999999	-3.846	-7.999	0.068848	-0.086426	-0.11475	33.77947	122.6393	294.386	-0.15156	0.15342	-0.4584
3.108	-58.89	147.5554	708.536	-0.24873	0.879	-1.0522	-76.116	-86.736	1684.301	-1.8784	1.4771	-1.1294	-28.51	-11.575	12.284	0.078125	-0.089844	-0.104	23.9782	133.716	280.378	-0.13711	0.10498	-0.42325
3.11	-59.33	150.2552	719.42758	-0.25	0.8833	-1.0767	-66.967	-73.405	1651.631	-1.832	1.4502	-1.1035	15.704	15.226	-7.9796	0.078613	-0.10303	-0.087891	-1.9025	136.265	252.088	-0.13633	0.073242	-0.40801
3.112	-63.522	142.4502	708.6359	-0.26015	0.88057	-1.0968	-75.528	-62.824	1606.541	-1.7966	1.4343	-1.0817	-18.126	-8.3119	14.06	0.083008	-0.11547	-0.083252	0.246	126.613	200.352	-0.14502	0.060059	-0.40771
3.114	-71.861	150.5614	697.8461	-0.27529	0.87881	-1.1142	-23.695	-81.454	1576.31	-1.7617	1.418	-1.0605	-9.03599999999999	52.8723	-4.75939	0.080078	-0.12793	-0.0625	6.2841	104.6378	130.7211	-0.15401	0.049902	-0.39971
3.116	-71.986	157.2314	688.1663	-0.29482	0.88037	-1.1282	-59.524	-82.887	1536.0709	-1.7026	1.3872	-1.0356	-19.412	4.988	-5.557	0.077148	-0.13818	-0.052734	4.104	51	118.2146	-0.15215	0.036328	-0.37764
3.118	-72.867	165.708	706.9057	-0.30986	0.87763	-1.1353	-59.2576	-48.696	1506.0534	-1.6753	1.3755	-1.0298	-24.727	39.823	31.3859	0.073242	-0.13379	-0.048828	27.164	84.825	98.355	-0.16621	0.051172	-0.38154
3.12	-54.912	165.6705	710.1606	-0.32471	0.87354	-1.1382	-7.785	-37.2747	1510.4151	-1.6113	1.3389	-0.99609	-2.22	28.5215	26.4205	0.075195	-0.17236	-0.025391	10.685	72.298	113.6332	-0.17412	0.05166	-0.371
3.122	-67.96	173.85346	696.98769	-0.34033	0.86201	-1.1372	-8.09	-13.5352	1505.5539	-1.5656	1.3127	-0.98218	-40.5856	22.1716	58.992	0.081054	-0.17798	-0.013184	-5.209	126.3952	71.0085	-0.18115	0.064941	-0.36084
3.124	-66.33	170.9469	690.5835	-0.35342	0.85049	-1.1327	-17.508	1.9439	1471.667	-1.5137	1.2793	-0.96094	-3.069	78.718	23.7726	0.087402	-0.18018	-0.013672	-22.1144	89.6443	54.4898	-0.19111	0.074707	-0.354
3.126	-54.398	169.8647	688.7541	-0.37178	0.83213	-1.1331	-11.939	-12.4506	1445.147	-1.4429	1.2368	-0.93311	-51.85064	20.893	19.648	0.098145	-0.1748	-0.016602	-14.1172	80.6388	41.284	-0.20108	0.075098	-0.33272
3.128	-59.038	165.13421	683.2354	-0.37959	0.81064	-1.1347	-54.5522	-8.6229	1415.438	-1.4063	1.2148	-0.91602	-64.4779	80.114	10.737	0.10303	-0.16553	-0.015625	-27.6474	52.163	39.6855	-0.21006	0.08291	-0.31826
3.13	-79.0987	188.0695	670.6363	-0.39209	0.80029	-1.1401	-69.2902	-13.3391	1409.7097	-1.3442	1.1724	-0.88623	-60.71117	46.4786	-4.7071	0.12256	-0.16357	-0.01123	-43.353	52.723	42.778	-0.22373	0.090234	-0.30723
3.132	-73.648	177.634	670.82884	-0.40176	0.79024	-1.1471	-46.4837	-24.309	1414.0921	-1.2978	1.1372	-0.86523	-75.6061	59.065	20.005	0.13208	-0.16846	-0.0078125	-69.1988	64.7076	44.5139	-0.23877	0.09375	-0.29443
3.134	-69.012	167.282	671.12943	-0.40312	0.79492	-1.1603	-58.6642	-3.634	1372.334	-1.2573	1.1001	-0.84326	-34.146	67.793	-2.749	0.14795	-0.16846	-0.0039063	-80.384	60.0111	30.48682	-0.24707	0.091113	-0.2791
3.136	-77.022	165.1244	642.1073	-0.40078	0.79687	-1.174	-17.8211	-7.1553	1320.768	-1.2129	1.0488	-0.81104	-74.899	-7.2806	39.8266	0.16064	-0.1792	0.0014648	-67.176	66.093	21.8411	-0.24912	0.089062	-0.26435
3.138	-85.178	168.9217	650.7143	-0.39502	0.8042	-1.1903	-22.845	-22.00681	1299.5919	-1.1851	1.0308	-0.79443	-21.894	39.449	33.002	0.16699	-0.1792	0	-57.1944	36.1988	20.212	-0.23662	0.088672	-0.25381
3.14	-70.289	181.4759	638.357	-0.38135	0.80078	-1.2012	-74.245	18.082	1263.216	-1.1401	0.98291	-0.76709	-33.30456	-22.567	36.3654	0.18408	-0.18506	0.013184	-48.5702	45.523	14.654	-0.22217	0.08125	-0.2414
3.142	-69.676	174.4534	660.519	-0.37676	0.8041	-1.2174	-58.9337	34.938	1256.3647	-1.0979	0.94751	-0.74195	-32.728	44.0006	40.5658	0.19385	-0.18482	0.01123	-42.3146	-9.2492	21.3013	-0.21289	0.073242	-0.2334
3.144	-55.415	179.589	634.514	-0.37383	0.79766	-1.2289	-69.6394	69.787	1231.0821	-1.0586	0.91602	-0.72266	-5.917	38.2711	7.33	0.20361	-0.17871	0.0048828	-40.0676	35.0848	-7.661	-0.20401	0.063672	-0.22295
3.146	-61.2302	164.162	631.544	-0.38281	0.78476	-1.2441	-39.45191	109.8917	1186.154	-1.0117	0.87207	-0.69482	-35.4211	17.0329	47.375	0.2168	-0.17969	-0.0024414	-50.953	13.694	-0.293999999999997	-0.18164	0.047754	-0.20703
3.148	-65.342	165.426	662.576	-0.40518	0.77764	-1.2564	0.164999999999999	93.0192	1163.111	-0.98193	0.84814	-0.66943	-9.365	45.127	13.7236	0.2251	-0.18311	-0.0019531	-38.7178	42.902	9.525	-0.15	0.029395	-0.18868
3.15	-37.662	178.6824	681.39	-0.43848	0.77393	-1.2671	-45.5474	113.157	1115.513	-0.92383	0.79883	-0.63867	-25.6308	-6.8205	35.0504	0.24268	-0.18799	0.003418	-54.093	32.965	43.375	-0.12939	0.024121	-0.17432
3.152	-39.22	197.2574	712.5	-0.48223	0.76543	-1.2779	-52.732	134.463	1077.464	-0.89698	0.76123	-0.61987	5.89400000000001	44.453	47.399	0.25342	-0.19287	0.005127	-19.444	50.0014	48.4364	-0.1084	-0.0063477	-0.13867
3.154	-52.411	198.006	752.22	-0.52685	0.75771	-1.2867	-52.977	118.49	1081.727	-0.86719	0.73047	-0.59961	-3.772	-0.511000000000001	44.7491	0.26172	-0.18652	-0.00048828	-15.22	56.5	57.397	-0.071973	-0.022656	-0.10215
3.156	-36.756	194.949	786.73	-0.57373	0.75381	-1.2999	-66.694	150.477	1045.7444	-0.82959	0.68506	-0.56494	-21.139	24.852	48.512	0.25977	-0.1748	-0.014648	6.539	67.879	31.4512	-0.032519	-0.018848	-0.08711
3.158	-45.671	199.472	841.72	-0.61934	0.74863	-1.3123	-15.20919	126.626	1013.5426	-0.81006	0.66357	-0.55029	3.707	34.444	-3.0206	0.26148	-0.1626	-0.021485	1.339	79.132	22.6834	0.0065431	-0.012989	-0.089453
3.16	-73.2962	210.511	909.79	-0.67334	0.74658	-1.3276	2.284	91.0249	975.2792	-0.77686	0.62744	-0.53369	-27.9606	4.21858	8.3616	0.26123	-0.15723	-0.020996	-8.091	46.7259	49.406	0.068555	-0.046582	-0.039258
3.162	-82.453	222.721	967.42	-0.73027	0.74316	-1.3502	-22.75963	113.329	903.163	-0.74292	0.60034	-0.5122	29.199	56.486	3.0048	0.26221	-0.14355	-0.035156	-3.342	24.2307	35.6096	0.11768	-0.052246	-0.017578
3.164	-68.592	220.356	1044.4	-0.79453	0.73575	-1.368	-15.2157	101.0277	862.12	-0.70313	0.56885	-0.49512	-4.824	-9.9743	17.3443	0.25732	-0.12988	-0.041016	15.06	-42.018	36.44	0.15068	-0.058691	-0.015723
3.166	-75.443	204.089	1080.13	-0.86015	0.72949	-1.3789	-20.66086	114.56711	836.8487	-0.65234	0.53516	-0.46973	-2.885	42.225	29.368	0.23877	-0.10498	-0.06543	19.8718	-12.5807	3.2804	0.20381	-0.10957	0.041113
3.168	-105.047	185.40407	1154.54	-0.93135	0.73154	-1.3907	-3.394	142.88636	790.7154	-0.62842	0.51855	-0.46338	1.311	22.4864	-3.347	0.229	-0.089111	-0.080567	-0.198	-37.1262	1.383	0.24209	-0.11621	0.049707
3.17	-67.93	144.267	1229.41	-1.0034	0.73486	-1.3979	26.164	106.683	773.145	-0.57959	0.48779	-0.4458	-42.0215	8.1039	38.9139	0.21484	-0.07373	-0.091797	24.878	25.1	10.487	0.26572	-0.13662	0.056641
3.172	-55.489	97.063	1274.79	-1.0685	0.75293	-1.4004	26.4622	120.068	763.4198	-0.54053	0.45557	-0.41797	-9.668	36.234	22.1617	0.19775	-0.057129	-0.10986	-4.429	6.59	48.588	0.2998	-0.1626	0.072266
3.174	-66.7752	58.52	1310.9	-1.1085	0.76826	-1.3924	24.9625	138.3353	724.6073	-0.50879	0.43262	-0.4043	-41.8102	-18.2555	40.1442	0.19189	-0.04834	-0.12061	9.063	-0.92172	50.3313	0.32559	-0.18897	0.088379
3.176	-77.121	22.91	1309.09	-1.1151	0.78037	-1.3772	35.188	123.95012	710.543	-0.4624	0.40479	-0.3833	-28.729	41.50799	19.0588	0.16992	-0.03125	-0.12939	10.8356	2.25826	35.0005	0.33594	-0.20722	0.092577
3.178	-59.7222	-28.55	1317.15	-1.0882	0.79053	-1.3542	9.8814	178.21	651.271	-0.43359	0.38477	-0.36719	-45.745	-7.2867	5.666	0.15454	-0.019775	-0.14502	-2.1713	-2.1133	29.682	0.3418	-0.21465	0.080078
3.18	-51.099	-63.3	1326.24	-1.021	0.79346	-1.3198	16.1137	172.899	578.7786	-0.39551	0.34375	-0.34912	-48.3628	26.534	36.5324	0.13965	-0.010254	-0.16064	-10.3074	8.597	19.71132	0.35957	-0.23486	0.092188
3.182	-74.798	-104.115	1283.44	-0.91914	0.78262	-1.2805	35.092	148.217	555.2609	-0.3711	0.32544	-0.34277	-34.513	31.5852	5.453	0.11914	-0.0014648	-0.17773	-37.014	2.5765	31.1737	0.36865	-0.23242	0.080078
3.184	-80.149	-118.085	1252.68	-0.79824	0.76319	-1.2363	14.4575	159.794	517.525	-0.34473	0.30469	-0.33105	-67.3698	3.6492	26.9561	0.11133	0.0039063	-0.19873	-60.6833	30.7846	-0.707000000000001	0.38369	-0.24902	0.093652
3.186	-50.1112	-138.323	1224.22	-0.66855	0.72412	-1.1926	24.6834	105.677988	494.62	-0.30811	0.27197	-0.30615	-24.632	55.1432	2.495	0.085938	0.013184	-0.2085	-78.0737	0.413	-25.5734	0.39502	-0.24736	0.078713
3.188	-68.7507	-131.287	1184.32	-0.54082	0.67529	-1.155	4.272	106.94	490.6386	-0.28125	0.24707	-0.29639	-57.8509	-0.00400000000000134	8.724	0.070801	0.022705	-0.22779	-38.6002	45.916	-42.996	0.4001	-0.24307	0.066605
3.19	-65.8446	-102.589	1129.21	-0.4165	0.60693	-1.1245	-11.23078	129.711	450.22665	-0.25342	0.23047	-0.29004	-51.0144	54.1735	19.208	0.04834	0.036621	-0.24365	-69.193	27.167	-17.1739	0.40528	-0.23409	0.059572
3.192	-54.304	-90.622	1099.04	-0.31348	0.54531	-1.0964	-11.1291	100.5	421.888	-0.229	0.21802	-0.28638	-29.879	21.8023	11.107	0.021973	0.053711	-0.26709	-69.869	68.5706	-11.656	0.40674	-0.22461	0.04834
3.194	-33.27	-65.11	1077.06	-0.21963	0.48428	-1.0722	-10.306	123.0127	398.7177	-0.20215	0.1958	-0.26807	-52.063	54.086	29.948	0.0078125	0.063965	-0.28125	-51.6611	47.0983	24.5505	0.40322	-0.22324	0.036031
3.196	-20.845	-42.39	1056.87	-0.13682	0.42217	-1.0452	-9.1279	132.3194	363.6872	-0.15918	0.18018	-0.25684	-14.602	63.012	-11.2747	-0.023926	0.079102	-0.31201	-50.69	53.2019	18.111	0.39843	-0.21298	0.026164
3.198	-23.764	-30.98	1032.186	-0.069824	0.37158	-1.0237	-20.1529	114.6563	366.7161	-0.13916	0.1626	-0.23779	-29.875	12.08154	34.162	-0.049804	0.088623	-0.32885	-50.3512	39.4558	15.01	0.39336	-0.20634	0.016787
3.2	1.921	-42.27	1036.25	-0.0087891	0.32129	-0.99805	-18.3493	130.4535459	345.0529	-0.1123	0.15332	-0.24756	-24.154	62.45	37.737	-0.086914	0.10107	-0.35645	-38.9602	38.2803	17.7314	0.39268	-0.1956	0.0070087
3.202	15.774	-59.54	1033.589	0.036426	0.29101	-0.9836	-38.426	108.297	304.2462	-0.073242	0.13135	-0.22021	-32.8208	12.9526	68.417	-0.14844	0.12646	-0.38867	-39.5396	51.434	15.58	0.38428	-0.18994	-0.0092773
3.204	38.491	-79.713	988.883	0.076465	0.25655	-0.96006	-47.88	82.842	306.5738	-0.047852	0.12891	-0.22412	-19.082	67.43	109.2196	-0.18701	0.13281	-0.4082	-42.972	33.6158	35.832	0.37629	-0.17932	-0.019322
3.206	19.229	-113.983	960.223	0.10381	0.2335	-0.94795	-46.726	114.6724	281.5972	-0.029785	0.12207	-0.22998	13.265	43.3829	127.04	-0.27002	0.13818	-0.44336	-26.4301	59.134	29.794	0.35897	-0.16851	-0.034891
3.208	17.354	-153.799	953.598	0.11182	0.2207	-0.95127	-27.3126	81.5912	249.4165	-0.0083008	0.10889	-0.22607	-4.2696	20.1402	197.9847	-0.34644	0.1311	-0.49048	-23.3641	15.6217	41.3871	0.33865	-0.1529	-0.055197
3.21	41.355	-186.95	953.83	0.11768	0.20215	-0.94971	-44.60679	95.0727	240.2164	0.036621	0.08252	-0.20459	46.71692	60.202	228.8385	-0.42822	0.12158	-0.54834	-25.4892	40.574	8.0392	0.3089	-0.13941	-0.071612
3.212	35.37	-223.3414	946.103	0.11416	0.20518	-0.9541	-28.1841	113.846	192.7349	0.058838	0.072754	-0.20312	22.6827	23.4172	355.113	-0.57275	0.11621	-0.63232	17.348	4.48377	32.6241	0.27441	-0.12402	-0.09082
3.214	41.753	-248.9994	945.768	0.1044	0.21191	-0.97598	-33.061	78.0127	167.4117	0.074219	0.068359	-0.1958	45.141	107.132	486.88	-0.67188	0.13379	-0.6958	11.994	35.2798	48.958	0.24365	-0.10603	-0.11098
3.216	50.354	-257.771	956.65	0.084473	0.22675	-1.001	-49.215	78.996	155.697	0.085449	0.068359	-0.19629	25.878	67.4061	632.161	-0.90039	0.15088	-0.80762	-1.31	17.79537	59.523	0.22003	-0.090906	-0.12849
3.218	79.982	-241.7146	947.611	0.062891	0.25088	-1.0323	-17.4066	79.904	134.98	0.099608	0.057373	-0.18335	58.975	69.043	786.7519	-1.1004	0.17432	-0.88599	25.7854	30.3114	62.695	0.19651	-0.070445	-0.15405
3.22	52.029	-214.4732	924.208	0.03418	0.28174	-1.0737	-11.138	44.407	146.89	0.1084	0.056641	-0.1875	75.233	39.2134	868.904	-1.3213	0.24854	-0.99609	24.1564	11.939	30.891	0.17914	-0.052946	-0.17628
3.222	44.823	-177.868	925.475	-0.0029296	0.32549	-1.1134	-4.428	80.6258	140.204	0.12256	0.056641	-0.18701	39.066	4.6517	1002.4279	-1.5996	0.39355	-1.1602	6.94	7.4531	20.04636	0.16748	-0.036621	-0.20215
3.224	68.086	-145.653	943.155	-0.041113	0.3623	-1.1451	-0.9352	82.331	101.748	0.13281	0.056641	-0.17871	40.67	55.7386	1065.434	-1.7227	0.47949	-1.2246	8.491	21.7694	31.907	0.15837	-0.030698	-0.22488
3.226	83.125	-104.179	933.894	-0.075098	0.40293	-1.1795	3.581	60.517	103.2509	0.14404	0.050293	-0.17334	17.915	-22.719	1110.145	-1.9336	0.75781	-1.3555	-8.973	7.4073	46.271	0.14694	-0.016585	-0.24228
3.228	60.475	-85.937	931.598	-0.10957	0.44444	-1.212	-17.9335	84.98	82.0408	0.15723	0.046875	-0.16504	27.472	7.29199999999999	1153.317	-2.0196	1.0283	-1.4394	-18.8281	30.039	23.138	0.13285	-0.0079823	-0.26899
3.23	47.623	-72.574	933.158	-0.13623	0.48193	-1.2378	0.68	47.594	60.3024	0.16553	0.04834	-0.16309	5.3643	-49.133	1144.249	-2.0605	1.2949	-1.5479	21.0425	-25.454	5.9949	0.11292	0.0061411	-0.2838
3.232	49.979	-65.98	940.5	-0.15996	0.51191	-1.2693	17.094	29.4304	57.6851	0.17822	0.036133	-0.15137	-31.877	-91.094	1215.405	-1.9883	1.5586	-1.6914	-1.456	5.17466	10.9618	0.082031	0.019531	-0.30322
3.234	53.236	-51.67	928.774	-0.18174	0.54648	-1.2949	18.797	33.5358	25.447	0.18701	0.034668	-0.14063	-0.987000000000002	-72.6801	1238.279	-1.8711	1.623	-1.7383	-40.2127	-19.0663	13.93166	0.041905	0.031324	-0.32323
3.236	50.603	-58.819	913.306	-0.20205	0.55976	-1.3137	-0.939	3.856	1.096	0.19287	0.03125	-0.14063	-53.693	-113.9366	1302.267	-1.4766	1.5742	-1.7129	-27.186	16.1771	14.35215	-0.0042965	0.042456	-0.34414
3.238	40.216	-87.769	932.565	-0.20791	0.57568	-1.3309	-8.232	18.3224	23.803	0.19654	0.02124	-0.12646	-8.801	-47.132	1312.442	-1.1267	1.3567	-1.5867	-32.7395	-3.509	11.7479	-0.040678	0.052965	-0.37099
3.24	40.458	-109.409	939.934	-0.22461	0.58789	-1.3516	-11.668	25.837	5.448	0.20996	0.003418	-0.104	9.13	-110.173	1291.4314	-0.84375	1.127	-1.4785	-51.4475	19.251	-21.5657	-0.072642	0.072327	-0.39122
3.242	46.927	-130.1621	939.921	-0.24433	0.59492	-1.3598	-4.384	15.5858	8.986	0.21631	-0.015625	-0.09082	-30.775	-68.734	1331.133	-0.55762	0.90625	-1.4277	-34.2265	7.567	7.803	-0.092773	0.091797	-0.41309
3.244	32.849	-137.3696	934.93	-0.27266	0.59737	-1.3692	-9.38	40.201	24.482	0.21143	-0.021973	-0.089844	-44.651	-15.961	1336.405	-0.45264	0.83643	-1.4194	-58.0176	22.483	-6.22	-0.10666	0.11676	-0.43153
3.246	32.88	-139.1825	947.084	-0.29844	0.59463	-1.3727	-5.4734	37.9039	1.3023	0.2041	-0.036133	-0.073242	-83.415	-2.124	1395.892	-0.29492	0.72168	-1.3984	-75.34	41.643	-0.902299999999999	-0.11421	0.13364	-0.45319
3.248	25.649	-130.607	950.294	-0.32627	0.59756	-1.3708	-11.9202	14.5606	24.2034	0.20581	-0.045655	-0.06665	-110.35	95.859	1356.9615	-0.22021	0.64965	-1.3757	-65.7382	44.8183	16.0428	-0.12448	0.14957	-0.47809
3.25	46.729	-116.374	921.366	-0.35303	0.59521	-1.3589	-33.3022	41.34	27.7131	0.2041	-0.057129	-0.053223	-132.443	8.44900000000001	1329.856	-0.16357	0.5791	-1.3398	-51.964	55.776	-5.848	-0.12689	0.1479	-0.49457
3.252	37.361	-118.982	910.386	-0.36367	0.58369	-1.337	-32.5941	21.3883	3.9191	0.21387	-0.084961	-0.03418	-90.3702	-32.972	1331.973	-0.16211	0.53369	-1.3276	-52.1583	23.68	21.595	-0.13623	0.1377	-0.52295
3.254	55.42	-100.447	911.744	-0.3709	0.56757	-1.3168	-23.8583	1.5425	24.6858	0.21484	-0.092773	-0.02832	-107.477	-103.733	1306.338	-0.16602	0.51855	-1.3213	-29.2079	53.203	50.524	-0.1553	0.12763	-0.55018
3.256	51.856	-76.907	891.7	-0.36855	0.55352	-1.2887	-13.8665	10.7307	-3.4548	0.20361	-0.10205	-0.026367	-107.596	-135.916	1364.74	-0.18701	0.50439	-1.3179	-52.9024	28.9258	104.898	-0.2043	0.10496	-0.57214
3.258	36.161	-42.265	838.7138	-0.36866	0.53184	-1.2666	-41.517	1.6671	-21.7871	0.19605	-0.11669	-0.015381	-68.76	-89.072	1334.074	-0.21436	0.50732	-1.3247	-35.0634	67.145	161.321	-0.27885	0.091891	-0.59559
3.26	39.407	-33.148	802.4217	-0.37012	0.50879	-1.2461	-40.918	12.2506	15.5387	0.18701	-0.12793	-0.0068359	-64.7445	-156.853	1325.2005	-0.2666	0.52441	-1.3428	-2.8245	35.7394	240.249	-0.39753	0.092416	-0.66463
3.262	37.204	-10.575	775.8356	-0.3667	0.48193	-1.2155	-40.7791	34.158	0.2485	0.1626	-0.13916	-0.011719	-24.666	-116.1919	1303.9717	-0.37061	0.55713	-1.3608	9.3352	59.072	342.433	-0.5332	0.071289	-0.73438
3.264	46.189	-6.53299999999999	783.932	-0.35644	0.4585	-1.2008	-42.3773	2.2609	15.9729	0.15332	-0.15039	-0.0048828	-7.702	-162.884	1305.217	-0.43164	0.56836	-1.3652	48.7205	67.648	516.083	-0.69611	0.036571	-0.78557
3.266	44.707	-5.337	750.153	-0.34903	0.4292	-1.1777	-41.7571	4.222	26.067	0.13818	-0.1582	0.003418	-39.792	-160.874	1382.850942	-0.54883	0.59375	-1.375	59.686	106.919	725.002	-0.92492	0.053986	-0.8994
3.268	43.052	-24.313	733.834	-0.33438	0.41738	-1.1672	-23.89801	11.2409	0.125	0.12158	-0.1499	-0.0019531	-25.849	-152.222	1383.5521	-0.62158	0.63623	-1.416	43.441	83.8	959.425	-1.1895	0.061924	-0.98094
3.27	38.284	-28.941	728.007	-0.32324	0.41016	-1.1445	-24.6993	1.3149	27.2879	0.11523	-0.14648	-0.0043945	-34.6966	-167.688	1432.402	-0.67529	0.69775	-1.4819	42.9335	42.894	1158.735	-1.5181	0.15899	-1.0959
3.272	36.354	-30.824	718.808	-0.3043	0.40625	-1.1311	-14.5627	38.6139	19.77929	0.11914	-0.13281	-0.00048828	-24.6431	-76.505	1374.017	-0.68164	0.79492	-1.5742	30.1144	41.1627	1347.8781	-1.8472	0.27197	-1.1948
3.274	30.755	-27.02	694.595	-0.28398	0.40117	-1.1188	8.254	42.1945	-7.694	0.11963	-0.12598	0.0087891	-19.2003	-100.752	1315.936	-0.66699	0.83789	-1.6172	78.647	0.866	1522.03138	-2.1585	0.45086	-1.3044
3.276	34.105	-22.797	671.049	-0.26484	0.40078	-1.1016	-13.081	23.5133	14.57096	0.13086	-0.11475	0.0073242	-9.359	-38.508	1300.55	-0.60986	0.89893	-1.7046	79.83	29.497	1637.957	-2.4267	0.66108	-1.4034
3.278	42.034	-20.779	669.482	-0.24531	0.39599	-1.0794	-1.213	37.188	-4.8518	0.1416	-0.10669	0.0068359	-9.801	-68.337	1288.288	-0.58398	0.917	-1.7578	38.596	-41.459	1699.415	-2.5843	0.89901	-1.4765
3.28	41.529	-24.694	649.673	-0.22559	0.39453	-1.0625	-6.5489	9.62895	-7.8518	0.1499	-0.095703	-0.00048828	-13.059	-78.06	1350.1386	-0.58154	0.93408	-1.8101	37.1911	-77.625	1673.819	-2.6026	1.211	-1.5255
3.282	21.107	-37.412	649.907	-0.20821	0.38877	-1.0443	1.924	6.7502	31.2274	0.17871	-0.097168	0.0063477	67.256	-18.004	1330.823	-0.62793	0.9458	-1.8667	41.1397	-170.524	1618.06	-2.519	1.5024	-1.605
3.284	0	-40.5	638.642	-0.1874	0.38203	-1.0231	6.659	32.2035	8.9418	0.1875	-0.096191	0.0083008	47.4331	-72.2304	1347.782	-0.65576	0.95947	-1.8882	17.2679	-189.705	1550.36	-2.2775	1.6935	-1.7273
3.286	18.427	-25.952	624.824	-0.16904	0.37852	-1.0039	27.956	2.693	13.7912	0.20215	-0.098633	0.0058594	84.108	-12.6682	1345.726	-0.73486	0.99658	-1.9409	-24.627	-261.66	1524.524	-1.7611	1.6418	-1.6995
3.288	9.85700000000001	-10.324	580.615	-0.15039	0.37344	-0.98203	3.0264	17.0838	12.7616	0.20996	-0.10205	0.0083008	78.532	-59.712	1361.903	-0.77173	1.0383	-1.9705	-45.338	-245.58	1441.404	-1.0923	1.3621	-1.5463
3.29	-3.861	10.284	544.743	-0.13428	0.36182	-0.96045	5.377	34.0392	-20.1773	0.21387	-0.099121	0.011719	22.8401	-28.58548	1382.13	-0.79639	1.0767	-1.9917	-57.283	-247.51	1383.323	-0.55141	1.0642	-1.478
3.292	-10.893	15.0056	540.164	-0.12041	0.35742	-0.93906	5.03	3.3618	18.9491	0.20898	-0.098145	0.013672	42.8702	-12.286	1371.741	-0.80225	1.1196	-2.0093	-27.433	-224.437	1313.781	-0.14893	0.79932	-1.4722
3.294	-21.67	40.1229	508.937	-0.10684	0.35518	-0.91788	8.719	36.107	40.0947	0.20947	-0.097656	0.011719	-0.277699999999999	-35.9116	1391.023	-0.80078	1.1338	-2.0166	-42.697	-203.927	1289.733	0.046184	0.6253	-1.5036
3.296	-9.966	43.34634	490.819	-0.09707	0.35283	-0.896	-4.734	29.388	1.19792	0.20361	-0.086914	0.012695	25.1986	12.39	1384.514	-0.77734	1.1387	-2.0293	-66.297	-167.501	1323.731	0.094241	0.56778	-1.5223
3.298	-26.978	41.3297	487.465	-0.080567	0.34678	-0.86924	-9.1178	-2.4401	26.5286	0.198	-0.080566	0.0051269	-1.209	-61.372	1399.592	-0.76172	1.1035	-2.0176	-102.498	-106.337	1374.3992	0.020025	0.53496	-1.5277
3.3	-9.428	38.8792	474.729	-0.069336	0.3418	-0.85156	-13.4333	17.3166	19.3616	0.18848	-0.074219	0	36.59	-16.718	1377.697	-0.7627	1.084	-2.002	-129.6813	-60.15	1439.5004	-0.067867	0.49473	-1.495
3.302	-6.53299999999999	39.5101	469.731	-0.057325	0.33984	-0.82246	-37.937	-6.6547	-0.0879999999999974	0.17969	-0.065918	-0.0053711	35.115	-54.566	1308.242	-0.77344	1.0273	-1.9648	-155.881	10.85	1432.83	-0.18555	0.46094	-1.459
3.304	-14.073	50.0875	432.981	-0.046094	0.3458	-0.79638	-18.8051	11.209	37.8102	0.17773	-0.059082	-0.0097656	11.04212	-45.066	1278.7593	-0.78369	0.97266	-1.9312	-134.556	-51.93	1395.703	-0.32188	0.43105	-1.4221
3.306	-20.893	52.175	404.317	-0.038672	0.34658	-0.76904	-24.7068	52.3822	-2.676	0.16943	-0.056641	-0.015137	37.187	20.21	1236.7481	-0.79053	0.91846	-1.8999	-72.116	-106.277	1359.018	-0.47705	0.44033	-1.4158
3.308	-11.789	51.902	412.254	-0.032813	0.34268	-0.75098	-29.4589	23.67741	-7.046	0.16431	-0.04956	-0.021729	-31.595	16.936	1243.885	-0.78857	0.84814	-1.8706	-81.05	-262.773	1400.192	-0.63721	0.49659	-1.4329
3.31	-12.202	39.0167	397.308	-0.030762	0.33643	-0.72607	-15.451	30.624	29.7513	0.16357	-0.044434	-0.025879	35.98853	108.032	1236.8724	-0.78076	0.81592	-1.8472	-111.799	-299.864	1445.842	-0.7917	0.58447	-1.4788
3.312	-20.989	27.9933	383.158	-0.023047	0.33603	-0.69297	-34.3248	29.0784	-4.991	0.1626	-0.039063	-0.037109	26.4166	76.428	1212.446	-0.73975	0.78662	-1.8042	-71.447	-342.69	1467.163	-0.91602	0.68555	-1.5313
3.314	7.984	17.4941	370.972	-0.02002	0.33096	-0.66787	-28.8867	1.1029	25.8913	0.16602	-0.038574	-0.043457	6.3447	127.5528	1190.6591	-0.70533	0.76099	-1.7859	-38.9153	-334.601	1441.144	-0.99216	0.75742	-1.5713
3.316	5.66	19.125	377.82	-0.019238	0.32353	-0.64639	-28.36538	28.9774	39.154	0.17236	-0.040039	-0.060547	3.9586	115.8571	1141.19	-0.65967	0.74658	-1.7573	7.5598	-323.728	1450.864	-1.0521	0.80303	-1.6113
3.318	8.887	22.8621	383.254	-0.015527	0.31455	-0.61855	-31.1262	7.8953	-3.565	0.16773	-0.036621	-0.065673	-52.3066	106.706	1144.8139	-0.59131	0.73389	-1.7319	50.0918	-287.473	1521.876	-1.1209	0.921	-1.7254
3.32	-3.32400000000001	30.7248	341.977	-0.013672	0.31104	-0.58984	-27.46802	-8.3069	29.0661	0.16309	-0.037598	-0.071777	-30.774	149.751	1105.6047	-0.55713	0.72705	-1.7163	37.508	-253.16	1595.5217	-1.1854	1.035	-1.8409
3.322	4.448	30.092	329.503	-0.0091795	0.29912	-0.56621	-38.1515	32.705	8.819	0.14941	-0.035156	-0.09082	-60.7724	83.484	1100.217	-0.49268	0.71729	-1.6694	40.208	-233.513	1663.507	-1.1963	1.1465	-1.9473
3.324	13.094	38.835	330.11	-0.0045898	0.2918	-0.54121	-33.516	10.5458	-2.272	0.14355	-0.03125	-0.096191	-13.219	129.163	1062.5698	-0.46045	0.70801	-1.6435	22.6792	-175.902	1696.965	-1.1515	1.1493	-2.0089
3.326	1.828	45.86	306.721	-0.0014648	0.28593	-0.51973	0.141999999999999	12.9574	35.3473	0.12598	-0.03125	-0.1123	-18.514	66.8602	1010.373	-0.43555	0.70117	-1.6113	30.7119	-105.478	1670.215	-1.0898	1.123	-2.0768
3.328	4.851	49.804	314.909	0.0023437	0.27813	-0.4959	-18.5129	31.888	-2.549	0.11157	-0.021728	-0.12232	-27.1385	97.3684	993.623	-0.4126	0.69531	-1.5605	78.083	-13.27	1579.0092	-1.0386	1.0742	-2.1226
3.33	-5.941	57.305	307.733	0.0024414	0.26367	-0.46631	-7.3902	-1.6923	2.16	0.1001	-0.01416	-0.13232	-12.887	106.062	973.229	-0.40088	0.68994	-1.5308	114.253	-5.66	1543.837	-1.0296	1.0743	-2.1722
3.332	9.454	57.268	293.263	0.0035156	0.25606	-0.44619	3.435	26.602	20.7552	0.079102	0.003418	-0.1499	-58.9451	97.619	999.7549	-0.39111	0.67236	-1.4722	62.122	8.46499999999999	1516.896	-1.0796	1.0864	-2.23
3.334	-17.079	58.617	295.462	0.0083984	0.24737	-0.4292	5.5466	17.6297	9.18069	0.072266	0.011719	-0.15869	-2.957	159.257	961.599	-0.38794	0.65966	-1.4277	73.603	-73.884	1551.8611	-1.2234	1.2375	-2.1359
3.336	-18.93	49.863	282.466	0.013086	0.23642	-0.40654	14.623	-15.094	31.796	0.058594	0.024902	-0.18018	-3.797	119.178	906.3622	-0.38477	0.63867	-1.3711	95.869	-74.9196	1561.398	-1.3818	1.2769	-2.2332
3.338	-13.17	62.985	286.001	0.014844	0.22754	-0.38389	-2.594	28.949	22.0087	0.050537	0.04126	-0.19629	-5.885	193.054	881.184	-0.38574	0.62109	-1.3145	68.226	-80.473	1547.103	-1.3986	1.4	-2.2953
3.34	8.594	67.825	285.973	0.015625	0.22607	-0.36816	1.4202	12.0178	-12.6496	0.041504	0.056641	-0.21387	-10.106	176.376	842.6	-0.39209	0.61768	-1.2827	99.635	-66.423	1566.6046	-1.4019	1.3802	-2.3639
3.342	-25.462	54.242	269.965	0.021777	0.22305	-0.35293	18.0554	15.541	24.7378	0.030273	0.077637	-0.23047	-55.635	203.483	858.0198	-0.39551	0.60742	-1.2188	93.408	-61.785	1555.648	-1.3062	1.3716	-2.353
3.344	-46.571	47.388	278.077	0.021875	0.21484	-0.33868	0.509	48.317	3.5023	0.023926	0.087402	-0.24072	-44.202	232.102	806.871	-0.39185	0.59986	-1.1667	63.439	-91.986	1551.168	-1.2255	1.2915	-2.3405
3.346	-17.425	43.849	275.538	0.023829	0.20976	-0.31563	-10.1061	9.5354	-7.3447	0.0039063	0.10645	-0.25488	-77.1517	178.303	783.826	-0.38525	0.59033	-1.1147	34.5066	-92.053	1552.405	-1.1202	1.1723	-2.2804
3.348	-24.257	54.202	262.645	0.023438	0.2041	-0.30166	19.959	23.8193	10.7562	-0.0056153	0.11963	-0.27075	-24.497	201.9	739.0542	-0.37695	0.57715	-1.0449	14.609	-113.135	1568.115	-1.028	1.0294	-2.2101
3.35	-25.28	53.232	267.856	0.022949	0.19434	-0.28711	-13.45949	21.6509	-6.9343	-0.018555	0.12793	-0.28174	-62.008	129.1441	700.342	-0.36963	0.57227	-1.0117	-34.086	-52.499	1566.498	-0.98164	0.9	-2.1422
3.352	-38.249	47.271	263.442	0.021875	0.1917	-0.27217	-26.5417	-15.3358	27.5761	-0.037598	0.14355	-0.29395	-56.959	197.613	697.8086	-0.35938	0.5498	-0.93652	-38.7817	-59.599	1532.72	-0.9541	0.81836	-2.0801
3.354	-21.861	48.103	266.361	0.017969	0.19034	-0.26436	-0.694000000000001	28.3373	42.779	-0.049805	0.15576	-0.29639	-42.165	173.912	631.707	-0.35107	0.53149	-0.87866	-38.592	-8.1327	1464.212	-0.94229	0.77315	-2.0345
3.356	-31.951	55.046	260.349	0.015625	0.18252	-0.25225	-18.9677	24.2815	3.6097	-0.064453	0.17041	-0.31201	-68.923	153.354	629.29684	-0.33984	0.50488	-0.82031	-14.9327	-4.716	1373.183	-0.94287	0.73955	-2.0085
3.358	-43.028	59.775	263.834	0.013672	0.17891	-0.24034	-6.882	0.995000000000001	24.965785	-0.084961	0.17578	-0.32715	-26.236	166.6493	590.29123	-0.32031	0.46484	-0.73828	-41.6507	28.248	1317.741	-0.94326	0.72002	-1.9866
3.36	-19.042	55.859	268.234	0.0078125	0.17432	-0.22803	-25.134	44.37763	15.9184	-0.095215	0.17725	-0.3335	-47.65	114.196	598.499	-0.30811	0.4541	-0.69287	-52.0022	57.625	1274.03	-0.94317	0.69707	-1.9523
3.362	-21.638	62.071	269.304	0.0015625	0.17295	-0.22422	-46.6691	5.674	-17.9364	-0.13525	0.16992	-0.34961	-32.918	183.0846	564.73	-0.27539	0.41846	-0.62256	-72.3408	106.366	1272.937	-0.92139	0.68066	-1.9175
3.364	-13.068	75.443	258.503	-0.0015625	0.17304	-0.21387	-29.9675	10.779	28.9423	-0.18775	0.15894	-0.36743	-52.418	157.2091	538.912	-0.24658	0.3916	-0.57592	-67.7623	161.0866	1256.577	-0.88086	0.6709	-1.8723
3.366	-18.363	74.792	242.133	-0.0035156	0.17617	-0.21035	-16.2402	23.4298	37.363	-0.25195	0.14404	-0.38818	-58.168	190.488	526.946	-0.21094	0.36328	-0.52246	-40.718	176.808	1209.414	-0.81787	0.66455	-1.8214
3.368	-11.805	73.578	258.099	-0.01084	0.16836	-0.19853	-54.138	-34.7955	65.6868	-0.37256	0.12451	-0.44092	-26.636	170.654	467.8243	-0.17285	0.33301	-0.46338	-64.6618	211.921	1156.619	-0.75459	0.66768	-1.7745
3.37	-8.161	64.976	277.49	-0.016113	0.17236	-0.2002	-21.7342	2.5132	149.317	-0.44336	0.1001	-0.4502	-57.0262	131.5743	455.549	-0.14795	0.30859	-0.43311	-60.4475	229.807	1135.772	-0.69726	0.66504	-1.7318
3.372	-14.949	65.792	284.093	-0.023535	0.16572	-0.19443	11.9304	30.0881	147.685	-0.63135	0.067871	-0.51123	-33.139	156.01	404.4951	-0.10938	0.26807	-0.36865	-70.1977	266.531	1137.877	-0.65771	0.66162	-1.687
3.374	-8.06	62.233	289.501	-0.031152	0.16728	-0.19297	-7.8166	16.288	250.002	-0.84131	0.055664	-0.5708	-56.238	93.7627	385.4735	-0.086182	0.25708	-0.33887	-67.00663	233.125	1149.681	-0.64677	0.65654	-1.6286
3.376	-11.049	62.195	283.082	-0.034277	0.16338	-0.18828	23.0234	61.5849	427.804	-1.0791	0.047363	-0.63184	-18.568	141.76	387.148	-0.062012	0.24805	-0.31543	-68.991	238.24	1120.274	-0.64834	0.6583	-1.5599
3.378	9.329	68.324	294.666	-0.048047	0.16817	-0.19297	8.6751	52.9566	571.72	-1.4844	0.086426	-0.74121	-41.513	101.115	335.519	-0.024902	0.23145	-0.26953	-14.441	158.328	1068.7807	-0.65811	0.66416	-1.4931
3.38	-12.977	73.095	302.955	-0.053223	0.1709	-0.20264	50.443	35.2676	813.663	-1.7188	0.13086	-0.80176	-35.3824	126.305	315.1685	-0.0068359	0.21436	-0.24219	-8.967	131.377	1025.545	-0.66231	0.66308	-1.4295
3.382	4.908	62.154	327.964	-0.060449	0.1709	-0.20732	119.537	35.0051	977.363	-2.1973	0.2373	-0.89258	4.177	122.8069	261.998	0.025391	0.18213	-0.17334	-25.991	127.897	998.7303	-0.65625	0.65723	-1.3633
3.384	0.321999999999996	60.481	329.493	-0.068848	0.17627	-0.20547	61.23906	-32.0367	1117.995	-2.5661	0.38306	-0.98119	-34.673	84.1	272.812	0.050781	0.17505	-0.14941	-45.46	147.84	992.794	-0.63633	0.64453	-1.2914
3.386	6.828	69.15	328.431	-0.077051	0.18252	-0.21367	84.147	-26.174	1222.297	-2.8965	0.57715	-1.0801	-15.639	132.343	268.043	0.073242	0.18213	-0.14063	-40.492	156.789	953.696	-0.60918	0.63125	-1.218
3.388	-23.621	68.165	327.06	-0.081738	0.19453	-0.21836	55.961	-22.974	1217.796	-3.1597	0.93408	-1.1147	-30.242	94.3799	244.2099	0.098145	0.17139	-0.10645	-41.348	130.775	907.376	-0.57793	0.60742	-1.1488
3.39	-17.561	73.584	337.202	-0.086426	0.2002	-0.22656	31.474	-48.072	1222.077	-3.2769	1.1509	-1.1714	-25.46	150.026	238.186	0.1123	0.16553	-0.078125	-26.275	136.799	843.669	-0.5415	0.57588	-1.0778
3.392	9.06	72.514	351.28	-0.095313	0.20723	-0.2335	38.0162	-8.414	1281.163	-3.3784	1.5005	-1.3765	-19.562	118.703	207.378	0.13086	0.14893	-0.039551	-42.272	142.674	801.84	-0.51367	0.54688	-1.0039
3.394	-24.257	91.144	346.555	-0.10196	0.21035	-0.2418	34.212	-23.472	1305.894	-3.1635	1.6851	-1.5308	-53.4637	92.5768	225.546	0.1438	0.16089	-0.021972	-45.491	228.376	755.858	-0.48691	0.52393	-0.93125
3.396	-13.736	84.892	353.916	-0.10703	0.21504	-0.24922	36.7482	-47.027	1377.858	-2.6914	1.7266	-1.5449	-17.114	107.5947	186.977	0.15186	0.16016	-0.0092773	-82.88487	240.715	704.019	-0.46123	0.49892	-0.84658
3.398	-24.913	70.43	361.08	-0.10957	0.21719	-0.26113	12.3579	-35.719	1432.3625	-1.9102	1.5664	-1.3945	-31.525	68.85	163.512	0.16943	0.15625	0.026855	-109.38	272.84	632.3841	-0.4417	0.46768	-0.76143
3.4	1.51600000000001	73.05	382.177	-0.11914	0.2207	-0.26758	-16.27636	-85.166	1411.35	-1.623	1.416	-1.3477	-8.885	122.6512	139.6282	0.18311	0.15186	0.040039	-67.6353	211.6415	566.2768	-0.42275	0.44531	-0.69473
3.402	-26.016	82.008	389.03	-0.11563	0.22803	-0.27891	-12.994	-118.195	1456.7871	-1.2432	1.082	-1.3398	-35.934	69.515	111.882	0.20068	0.14014	0.063965	-64.863	204.6313	525.566	-0.40234	0.42383	-0.62891
3.404	-34.765	80.875	396.687	-0.11787	0.23067	-0.28799	-4.78	-69.616	1436.216	-1.0369	0.87964	-1.3386	-43.7438	93.2109	117.104	0.20655	0.13623	0.072754	-42.673	198.825	498.539	-0.37881	0.40264	-0.55478
3.406	-14.991	71.84	405.022	-0.1206	0.23223	-0.30244	-10.256	-36.789	1446.657	-0.87109	0.75	-1.333	-51.181	84.9685	80.104	0.21191	0.12549	0.086426	-43.263	208.3173	477.3976	-0.35244	0.37676	-0.48555
3.408	-11.956	65.838	419.7	-0.12412	0.23096	-0.31513	-42.355	49.633	1534.288	-0.76904	0.69385	-1.3394	-33.0243	71.7814	81.846	0.21582	0.10938	0.11182	-83.47	215.6743	424.4299	-0.31768	0.34863	-0.40937
3.41	-9.082	65.162	428.364	-0.13184	0.229	-0.32813	-112.4739	84.042	1534.638	-0.76563	0.69824	-1.3574	-22.536	99.675	87.6528	0.2207	0.10107	0.13135	-93.974	188.6379	349.805	-0.29834	0.321	-0.36631
3.412	-17.888	60.902	434.627	-0.1377	0.23448	-0.34571	-163.108	-3.97	1532.835	-0.76563	0.68066	-1.3438	-62.422	53.856	101.2253	0.21777	0.088867	0.14746	-67.9666	159.828	312.665	-0.26563	0.29883	-0.29199
3.414	-3.514	57.184	458.581	-0.14278	0.23877	-0.36064	-135.646	-78.774	1523.9518	-0.80127	0.625	-1.3594	-36.2622	101.564	101.2056	0.22168	0.077881	0.16577	-77.638	127.437	327.403	-0.2169	0.28789	-0.20098
3.416	5.11	56.787	460.748	-0.15646	0.24111	-0.37435	-152.482	-139.317	1466.041	-0.83447	0.5415	-1.3726	-44.918	80.1015	49.466	0.21777	0.063477	0.17871	-79.06553	135.618	340.15	-0.18516	0.25224	-0.1416
3.418	-2.942	61.819	465.26	-0.16661	0.25059	-0.39053	-119.641	-171.791	1497.069	-0.85742	0.51758	-1.3398	-57.1716	91.832	51.9561	0.22217	0.050781	0.18457	-72.2223	118.51	322.7007	-0.1543	0.21826	-0.10528
3.42	12.079	60.06	479.58	-0.17725	0.25781	-0.40234	-107.4165	-139.76	1499.963	-0.88086	0.52734	-1.3252	-30.934	89.596	38.5237	0.22119	0.049805	0.18311	-86.114	160.234	262.636	-0.13574	0.21181	-0.087012
3.422	20.992	65.635	499.409	-0.1829	0.2703	-0.42303	-133.408	-167.0986	1446.357	-0.94531	0.54639	-1.3496	-30.489	47.56271	38.922	0.21973	0.036133	0.19971	-66.708	168.43	237.899	-0.091309	0.1499	-0.016113
3.424	34.908	67.115	525.567	-0.18993	0.28279	-0.44135	-57.3861	-203.921	1484.661	-0.99999	0.56543	-1.3697	-21.423	74.832	29.5645	0.22021	0.039795	0.19922	-43.4611	187.155	222.4104	-0.063281	0.12783	0.022754
3.426	1.181	69.762	519.552	-0.19345	0.28905	-0.46123	-69.808	-193.688	1473.909	-1.064	0.59131	-1.3979	-44.4837	17.0779	10.282	0.21582	0.039063	0.20313	-25.586	164.422	212.38709	-0.045215	0.10918	0.044824
3.428	23.677	68.525	528.249	-0.19453	0.29721	-0.48333	-53.86	-209.033	1476.6293	-1.1602	0.62988	-1.4434	-20.682	34.9724	60.314	0.20996	0.052246	0.20068	-21.194	139.52	181.4344	-0.026465	0.05918	0.088574
3.43	28.587	82.097	540.449	-0.19482	0.30518	-0.50146	-19.401	-161.41	1549.36848	-1.2168	0.66602	-1.4824	-53.797	10.52988	47.725	0.20752	0.053711	0.19775	7.957	142.6001	167.212	-0.011133	0.052051	0.11026
3.432	35.027	90.507	540.067	-0.19187	0.31459	-0.528	-32.0872	-109.0626	1503.378	-1.3594	0.75879	-1.584	-34.948	25.373	44.6	0.21387	0.066895	0.19434	-20.059	137.793	147.022	-0.01123	0.056641	0.10547
3.434	18.137	77.638	554.514	-0.19396	0.31939	-0.55307	-9.8056	-123.764	1508.8764	-1.4538	0.80542	-1.6335	0.408999999999999	65.567	1.029	0.21973	0.078125	0.20459	-8.1672	145.9329	132.6012	-0.00078124	0.037109	0.14199
3.436	36.621	67.007	553.717	-0.19554	0.32411	-0.57526	14.5718	-78.159	1498.644	-1.5151	0.82666	-1.6479	-32.8544	22.63	7.099	0.2168	0.083008	0.19727	-0.375	119.364	124.85632	0.0125	0.033887	0.16201
3.438	39.923	66.473	584.108	-0.20389	0.33285	-0.59614	34.4617	-78.743	1452.2726	-1.5981	0.80322	-1.6929	-22.7691	56.034	48.673	0.22363	0.10645	0.18311	17.106	114.616	86.2784	0.014063	0.051465	0.15849
3.44	24.251	74.986	597.781	-0.2041	0.34326	-0.61768	54.241	-113.507	1475.1635	-1.6338	0.81445	-1.7051	-11.29	5.9844	45.6397	0.2378	0.11963	0.18042	5.58	72.407	79.8494	0.011133	0.062012	0.17354
3.442	19.004	65.702	606.067	-0.21017	0.35222	-0.64222	37.653	-73.824	1484.6938	-1.7358	0.84229	-1.7651	-3.296	28.0788	45.285	0.24707	0.12695	0.17676	-10.4217	88.999	80.818	0.0083008	0.085449	0.17676
3.444	21.036	64.257	615.198	-0.21527	0.35971	-0.66821	71.562	-89.252	1467.619	-1.7996	0.88062	-1.7952	-2.037	10.9311	10.2575	0.26416	0.13672	0.18018	-16.2531	61.787	90.889	0.002832	0.10596	0.18379
3.446	32.145	70.031	621.89	-0.21588	0.37182	-0.68975	135.816	-61.3439	1515.182	-1.855	0.93604	-1.8179	-15.087	2.3664	37.1582	0.27197	0.13428	0.17285	-22.840796	42.512	110.847	0.00039062	0.11836	0.2082
3.448	-1.292	82.085	615.333	-0.2236	0.37677	-0.71411	144.151	-20.1582	1490.393	-1.9155	0.97119	-1.8511	-15.862	39.149	22.044	0.28125	0.13281	0.16943	-4.047	10.162	105.411	0.0035156	0.14688	0.21368
3.45	2.377	78.684	628.934	-0.22266	0.38086	-0.74219	158.312	-79.121	1489.075	-1.9312	1.0005	-1.855	-28.557	4.0474	2.186	0.28614	0.12915	0.16797	-33.6027	-16.9589	65.697	0.0041016	0.15527	0.20323
3.452	15.238	74.296	650.323	-0.21814	0.3892	-0.76575	127.098	-71.748	1546.239	-1.9297	1.0137	-1.8633	1.798	61.395	15.1224	0.29102	0.12109	0.16016	20.5541	-13.699	35.9734	0.0063477	0.17041	0.20068
3.454	15.548	70.625	653.059	-0.21598	0.39515	-0.79081	79.7459	-60.827	1528.167	-1.8865	1.0081	-1.8484	-30.24	4.6062	3.992	0.29395	0.11523	0.15625	2.431	-10.802	9.87694	0.025097	0.18838	0.22031
3.456	1.792	85.063	659.04	-0.21841	0.40568	-0.81715	97.9	-70.719	1553.333	-1.8193	0.97266	-1.834	-27.541	8.034	41.574	0.2915	0.1123	0.15576	-33.4649	10.141	15.9679	0.039844	0.21064	0.23506
3.458	-10.45	84.001	658.368	-0.21914	0.41743	-0.84043	79.1961	-20.754	1555.679	-1.7202	0.92822	-1.8081	-26.897	16.682	17.9166	0.29199	0.10449	0.15283	-49.2524	-5.1083	16.0871	0.058594	0.22041	0.24365
3.46	11.324	88.828	679.3	-0.21729	0.42969	-0.86719	53.8597	-48.8675	1504.8843	-1.6616	0.8999	-1.7905	-35.024	4.911	17.7895	0.29004	0.10205	0.14306	-42.507	5.188	-14.0436	0.081445	0.22744	0.26065
3.462	14.506	91.443	671.337	-0.2199	0.43427	-0.88616	75.932	-64.1417	1489.8874	-1.5586	0.84766	-1.7539	-31.4326	53.1783	20.9854	0.29346	0.098633	0.13037	-47.311	-20.9158	-35.182	0.10645	0.23145	0.27344
3.464	-7.511	99.924	668.547	-0.21973	0.44101	-0.90866	41.7932	-18.4527	1431.265	-1.5212	0.82446	-1.7321	-20.929	8.059	31.0454	0.29688	0.10352	0.10254	-50.872	6.223	-37.018	0.13847	0.23037	0.29082
3.466	9.32700000000001	97.214	663.448	-0.21973	0.44908	-0.92731	40.2135	-27.637	1370.544	-1.4805	0.79297	-1.7051	-44.8312	24.6953	39.687	0.30029	0.1001	0.085938	-57.11517	37.013	-6.911	0.17314	0.22666	0.2998
3.468	13.053	106.856	685.989	-0.22	0.45488	-0.94406	57.3639	-1.366	1391.991	-1.4351	0.74268	-1.6636	-41.701	6.6574	-6.7635	0.30371	0.11133	0.04541	-75.515	74.542	-3.001	0.20517	0.22549	0.3084
3.47	4.688	105.08	691.567	-0.22314	0.45557	-0.96045	24.325	37.5363	1343.813	-1.416	0.7168	-1.6387	-28.833	9.907	0.324999999999999	0.30469	0.12647	0.015136	-42.0047	89.318	7.462	0.23613	0.20703	0.32061
3.472	-5.213	101.894	700.267	-0.2233	0.45995	-0.98484	22.561	1.964	1323.5716	-1.374	0.66016	-1.5898	-51.638	45.3821	-2.636	0.30957	0.14307	-0.018066	-44.85	60.266	-13.931	0.27686	0.17139	0.35547
3.474	23.263	101.664	699.373	-0.22714	0.46798	-1.0127	23.4931	60.0155	1336.769	-1.3425	0.62915	-1.5515	-48.363	10.674	18.058	0.30713	0.17285	-0.061523	-10.3152	28.9127	-7.7964	0.31485	0.15342	0.36856
3.476	27.367	111.279	704.258	-0.22792	0.475	-1.0425	-13.7388	72.8708	1248.229	-1.3042	0.604	-1.521	-24.343	57.4739	18.7246	0.30566	0.19287	-0.08252	-25.57	26.8703	-1.37	0.33642	0.13984	0.35986
3.478	28.114	131.09	712.861	-0.23346	0.47781	-1.0701	-19.6178	62.3117	1265.5202	-1.2534	0.59033	-1.478	-39.51	12.9237	-16.774	0.30078	0.23584	-0.12891	-35.3268	42.0641	18.1233	0.35401	0.12539	0.354
3.48	20.801	126.454	702.118	-0.24365	0.49072	-1.0991	-52.796	126.454	1238.538	-1.2266	0.59375	-1.4531	-34.3334	35.8102	16.3618	0.30151	0.26905	-0.15992	-42.329	46.2061	23	0.37178	0.080176	0.37187
3.482	20.626	127.985	714.677	-0.25434	0.50844	-1.1296	-47.089	79.364	1177.891	-1.1914	0.59766	-1.4141	-2.236	35.808	36.0869	0.30322	0.29883	-0.19824	-25.4366	50.3839	25.9047	0.38525	0.064941	0.36816
3.484	44.05	127.275	735.932	-0.27025	0.52869	-1.1499	-12.0153	62.46	1220.999	-1.1677	0.60376	-1.3738	-43.7995	29.8347	60.136	0.29541	0.31445	-0.23047	-38.5976	11.2723	20.377	0.38555	0.056543	0.34199
3.486	23.52	139.45	721.287	-0.27922	0.54978	-1.1675	-18.8083	87.019	1169.981	-1.1543	0.60352	-1.3359	-17.39	62.054	36.0047	0.28662	0.33252	-0.26074	-1.7214	29.72162	19.412	0.38731	0.044629	0.32998
3.488	22.75	134.627	720.149	-0.29004	0.56838	-1.1926	-2.4461	34.8387	1146.057	-1.1196	0.6001	-1.2808	-11.608	25.501	45.775	0.26221	0.39453	-0.3418	21.885	29.063	37.4364	0.39707	0.038379	0.32725
3.49	16.87	147.461	719.723	-0.29395	0.5835	-1.2012	16.7962	66.0395	1148.6715	-1.1089	0.59814	-1.2476	-36.2559	65.812	67.578	0.21826	0.4104	-0.40381	-18.3166	42.305	67.889	0.4042	0.026465	0.32842
3.492	34.34	154.416	722.692	-0.30194	0.60193	-1.2098	10.78	78.179	1073.1668	-1.0718	0.59033	-1.1909	-19.687	53.838	121.363	0.16162	0.41211	-0.45898	3.589	48.079	70.478	0.3916	0.032227	0.29541
3.494	17.473	167.142	729.885	-0.31882	0.61609	-1.2155	17.1177	65.761	1083.0072	-1.0308	0.57666	-1.1382	-19.696	76.0071	170.446	0.052734	0.40283	-0.54053	8.458	33.4062	48.5714	0.38359	0.040332	0.26924
3.496	16.559	160.131	713.749	-0.34265	0.62822	-1.2222	32.9411723	127.7854	1073.697	-1.0015	0.56689	-1.1069	-22.045	104.385	241.237	-0.017578	0.3916	-0.58643	33.5652	30.505	53.013	0.37548	0.05039	0.25733
3.498	13.988	153.005	739.452	-0.36845	0.63398	-1.2217	28.4923	124.5718	1002.9914	-0.95313	0.55078	-1.0596	-46.105	87.2599	368.933	-0.21484	0.38623	-0.67676	15.09	19.8164	36.661	0.36455	0.059375	0.24053
3.5	20.65	153.3	737.875	-0.39893	0.63281	-1.2168	37.79	124.3045	993.02	-0.91821	0.5393	-1.0125	-39.331	133.451	541.27	-0.40503	0.41992	-0.75732	9.2695	23.7322	64.685	0.34902	0.061817	0.22295
3.502	15.644	150.735	744.863	-0.42237	0.63427	-1.2098	25.0021	184.081	939.6078	-0.88232	0.53076	-0.97217	-42.49	107.8697	671.831	-0.61865	0.47705	-0.86279	-26.312	3.2994	34.6408	0.33203	0.06543	0.20264
3.504	2.90899999999999	157.443	743.036	-0.44874	0.63154	-1.2003	-12.877	138.226	892.301	-0.84766	0.51758	-0.91602	-9.841	146.558	813.8256	-0.93066	0.58008	-0.99805	-32.0332	20.4002	5.6899	0.32373	0.069336	0.18271
3.506	15.552	160.43	730.319	-0.46826	0.62216	-1.191	11.402	156.884	919.9643	-0.82764	0.5083	-0.89404	-1.006	129.286	920.843	-1.0776	0.65283	-1.0522	-32.8768	4.8565	-7.3046	0.31171	0.072657	0.16797
3.508	2.986	165.763	726.022	-0.48223	0.61758	-1.1851	-10.625	182.262	865.8399	-0.78906	0.49414	-0.83398	-74.409	80.211	1035.724	-1.3594	0.85156	-1.1465	-29.119	-2.9708	10.8917	0.29687	0.075391	0.15313
3.51	-2.528	172.803	728.845	-0.48926	0.60938	-1.1777	-18.501	128.187	827.4317	-0.76123	0.48486	-0.79248	-65.619	41.292	1101.8409	-1.5018	1.0544	-1.221	-16.089	-26.533	20.109	0.28389	0.086328	0.13662
3.512	-0.078000000000003	158.596	727.827	-0.49033	0.59561	-1.1677	1.574	163.701	817.018	-0.73193	0.47119	-0.73975	-73.054	-56.949	1114.095	-1.5698	1.2505	-1.2622	-34.196	-31.802	22.4144	0.27197	0.098633	0.11621
3.514	6.17599999999999	157.455	741.08	-0.4875	0.57852	-1.1511	-30.3585	149.375	726.4065	-0.69482	0.46533	-0.68506	-72.749	-66.273	1102.417	-1.5195	1.4648	-1.334	-30.0099	-20.44741	3.57385	0.26172	0.11192	0.10381
3.516	9.256	164.761	736.729	-0.47813	0.56485	-1.1399	-27.338	106.3647	726.8584	-0.67383	0.4502	-0.65137	-63.4818	-129.2749	1091.628	-1.4248	1.5488	-1.373	-40.804	2.065	-5.2315	0.25009	0.13086	0.083887
3.518	-10.761	166.004	735.928	-0.46768	0.54844	-1.1247	-15.901	157.3296	717.3304	-0.63672	0.43359	-0.59961	-92.798	-126.137	1113.107	-1.1055	1.6328	-1.377	-24.058	40.458	18.8737	0.2415	0.15313	0.06709
3.52	11.014	170.064	729.221	-0.44873	0.52979	-1.1128	-35.3107	117.741	654.493	-0.59034	0.40674	-0.54322	-105.266	-98.683	1109.381	-0.82422	1.5967	-1.2978	-59.145	39.5857	-2.554	0.23906	0.17861	0.050293
3.522	13.548	170.573	725.814	-0.42715	0.50723	-1.1008	-21.3254	111.162	677.36941	-0.55176	0.38379	-0.4917	-79.034	-123.682	1102.434	-0.57422	1.4746	-1.1836	-47.3515	33.05	-2.623	0.24414	0.20068	0.030273
3.524	6.708	189.884	721.188	-0.41094	0.48946	-1.0886	-48.138	150.86	643.00652	-0.49463	0.36084	-0.43311	-13.22	-103.34	1078.0647	-0.3584	1.25	-1.0488	-49.687	13.4727	-18.8224	0.24824	0.22295	0.012695
3.526	3.347	185.865	709.623	-0.40156	0.47344	-1.0793	-86.323	114.898	605.456	-0.46631	0.34082	-0.40479	-17.346	-200.072	1069.66705	-0.29785	1.1641	-1.0117	-55.496	27.218	-21.7526	0.25478	0.24404	-0.010938
3.528	8.612	186.324	690.6	-0.39395	0.46348	-1.068	-63.111	174.2034	596.386	-0.40576	0.31836	-0.35156	11.317	-144.055	1096.648	-0.25195	1.0391	-0.99219	-55.3951	35.0715	-21.544	0.25049	0.26319	-0.044141
3.53	18.915	184.492	707.452	-0.38428	0.45557	-1.0542	-34.5281	180.798	533.789	-0.35816	0.29443	-0.31226	-7.288	-103.312	1119.301	-0.26465	0.95313	-0.98657	-30.64031	66.395	15.9899	0.24316	0.27353	-0.077246
3.532	7.895	192.692	696.174	-0.37275	0.4544	-1.0417	-75.124	122.9902	492.9345	-0.31543	0.27246	-0.26807	-46.58683	-48.33	1152.1673	-0.30078	0.8833	-0.98193	-32.458	64.616	6.368	0.22803	0.28467	-0.11572
3.534	17.733	183.095	690.764	-0.36025	0.45976	-1.0357	-42.1856	153.97172	477.9429	-0.26904	0.24658	-0.22803	-49.598	-21.82	1136.5985	-0.39209	0.84521	-0.99561	-33.6416	53.312	17.965	0.20352	0.30234	-0.14717
3.536	17.041	193.471	679.449	-0.33838	0.46484	-1.0236	-62.303	124.951	427.984	-0.24219	0.229	-0.20068	-18.535	-135.702	1123.671	-0.43896	0.84619	-1.0288	4.36	49.888	14.715	0.17695	0.31895	-0.18428
3.538	29.746	180.614	687.073	-0.3126	0.48017	-1.0136	-39.8924	115.001	435.498	-0.19141	0.19189	-0.14307	-44.9048	-146.364	1121.456	-0.52148	0.87109	-1.0957	-28.0824	54.028	19.038	0.14297	0.34356	-0.22178
3.54	9.207	181.692	688.429	-0.2959	0.49609	-1.0039	-2.465	147.496	413.265	-0.16724	0.1792	-0.12451	-47.647	-230.217	1148.626	-0.55152	0.90015	-1.1365	4.951	62.052	53.432	0.121	0.36787	-0.25117
3.542	3.25	157.0031	682.051	-0.27558	0.50957	-0.99512	-17.7764	88.674	361.891	-0.13135	0.14551	-0.085938	-73.741	-252.303	1215.089	-0.5874	0.92041	-1.1841	-16.511	49.006	61.0265	0.10205	0.40283	-0.2832
3.544	17.554	162.182	674.488	-0.26299	0.52041	-0.98467	-22.6227	116.9061	356.719	-0.10059	0.14014	-0.073242	-66.234	-273.0289	1200.996	-0.65283	0.96045	-1.271	-12.3855	28.9652	47.5179	0.091015	0.43838	-0.30772
3.546	28.825	169.066	668.463	-0.2544	0.52823	-0.97529	-3.6017	149.067	327.149	-0.073242	0.12598	-0.057129	-8.201	-362.929	1232.75162	-0.69287	0.97705	-1.3237	7.301	-1.739	21.647	0.074512	0.48916	-0.34522
3.548	4.103	158.85552	670.639	-0.26036	0.53125	-0.96875	-22.79937	123.012	315.405	-0.032715	0.10303	-0.0097656	22.207	-322.99	1215.788	-0.78076	1.0161	-1.4077	34.3572	4.5059	40.7981	0.079199	0.52353	-0.36866
3.55	-16.467	163.1416	676.88	-0.27734	0.53125	-0.96387	-7.3138	152.366	339.761	-0.010498	0.086426	0.0073242	39.792	-368.123	1251.225	-0.84278	1.0425	-1.4663	-10.641	8.7248	33.765	0.086328	0.55039	-0.39326
3.552	-5.331	175.82	709.56	-0.29922	0.53262	-0.96133	1.158	112.3084	297.649	0.0053711	0.078613	0.017578	6.511	-294.607	1345.771	-0.89648	1.084	-1.5215	-11.9018	39.068	77.696	0.084961	0.58984	-0.43018
3.554	-14.102	178.294	711.89	-0.32217	0.53135	-0.9581	0.605	59.444	285.7484	0.038086	0.066406	0.036621	-5.698	-279.874	1424.8954	-0.95264	1.1821	-1.5991	2.792	33.524	61.281	0.083301	0.63184	-0.46524
3.556	-31.639	200.405	746.48	-0.35107	0.53096	-0.95772	30.6991	103.3187	273.7611	0.054199	0.062988	0.044922	-51.027	-254.04	1502.582	-0.97656	1.2324	-1.6348	-22.3927	11.0724	42.3739	0.091406	0.64815	-0.4752
3.558	-23.894	206.24	775.52	-0.37686	0.5333	-0.96787	26.98	70.3078	229.06	0.077148	0.063965	0.04541	-40.142	-173.032	1505.306	-1.0137	1.3438	-1.7148	-1.553	-23.7892	63.4185	0.090234	0.66104	-0.50371
3.56	-0.366999999999997	222.829	825.06	-0.40771	0.53369	-0.97998	35.51674	81.18324	257.7734	0.10352	0.045655	0.078125	-36.297	-193.926	1511.3212	-1.0271	1.4173	-1.7483	-16.622	-30.7109	88.938	0.076172	0.67393	-0.53935
3.562	0.0470000000000041	249.962	849.39	-0.43662	0.53877	-1.0043	23.9348	107.474	228.7241	0.12646	0.044922	0.090332	-99.8048	-123.995	1498.425	-1.0449	1.5	-1.7949	-26.307	15.2413	148.8637	0.046387	0.68164	-0.5791
3.564	-21.397	244.23	889.1	-0.46982	0.54853	-1.0194	-13.8787	51.5001	176.8137	0.13232	0.061523	0.063965	-90.5026	-146.096	1487.329	-1.0581	1.606	-1.8423	-57.59942	43.065	202.9141	9.78e-05	0.67217	-0.63926
3.566	10.202	227.571	923.97	-0.50302	0.56104	-1.0413	31.6541	69.5666	178.0754	0.14795	0.061523	0.067383	-98.6637	-107.926	1493.104	-1.0669	1.6626	-1.8589	-63.2753	43.115	326.514	-0.081933	0.66524	-0.72735
3.568	2.824	221.274	973.19	-0.53291	0.5751	-1.0573	3.422	67.4351	155.707	0.18359	0.050293	0.094727	-73.1149	-83.463	1480.672	-1.0864	1.7603	-1.8804	-97.2426	31.1989	464.089	-0.20576	0.65898	-0.83672
3.57	8.971	209.245	1007.93	-0.5625	0.59375	-1.0742	-40.5162	57.1401	158.2754	0.19312	0.060059	0.084961	-64.85	-147.9636	1537.707	-1.0906	1.8127	-1.8913	-55.06	51.823	682.257	-0.37588	0.64278	-0.9375
3.572	-4.549	176.362	1031.57	-0.58203	0.61445	-1.0894	5.447	108.359	165.0932	0.19434	0.066406	0.070313	-50.816	-119.805	1560.669	-1.0991	1.8384	-1.8921	-60.643	76.4745	917.939	-0.60596	0.63135	-1.0386
3.574	8.51	139.0461	1065.9	-0.59677	0.63448	-1.1042	-24.6737	86.465	103.449	0.19971	0.08252	0.065918	-58.243	-190.251	1593.945	-1.1011	1.8267	-1.8726	-57.443	109.6729	1179.572	-0.93135	0.66397	-1.1583
3.576	-8.536	107.053	1072.73	-0.60849	0.654	-1.1151	-41.521	79.4867	112.361	0.19922	0.085938	0.067383	-63.587	-113.172	1611.565	-1.0886	1.7874	-1.8387	-76.18292	80.087	1355.699	-1.2977	0.71992	-1.2592
3.578	-6.878	91.494	1083.86	-0.61601	0.68057	-1.1177	1.027	100.72	141.1142	0.20117	0.097168	0.064941	-42.02	-80.647	1605.878	-1.0728	1.7368	-1.7983	-126.315	31.204	1485.978	-1.6805	0.78711	-1.3186
3.58	-6.573	52.333	1079.63	-0.61523	0.7002	-1.1133	-55.9475	44.481	102.1983	0.19873	0.10498	0.063232	-74.205	-64.9371	1633.136	-1.0459	1.6543	-1.7402	-98.6438	-37.035	1542.4046	-2.0312	0.93515	-1.3377
3.582	-14.067	9.343	1083.83	-0.59805	0.72578	-1.0965	-42.0904	70.471	101.874	0.19385	0.11377	0.062012	-73.6584	-36.523	1626.076	-1.0283	1.6191	-1.7227	-112.5162	-86.616	1544.313	-2.2935	1.1167	-1.3218
3.584	-10.93	-5.194	1083.82	-0.56797	0.75195	-1.0746	-2.3455	78.656	75.5103	0.18604	0.11914	0.055176	-89.654	-121.508	1645.5822	-0.97607	1.5688	-1.6929	-78.957	-98.303	1516.593	-2.3132	1.2653	-1.2413
3.586	-24.971	-21.659	1067.17	-0.52187	0.76602	-1.048	-53.435	21.2587	26.027	0.18262	0.12256	0.052734	-61.085	-89.2	1655.11	-0.92407	1.551	-1.6804	-74.571	-117.094	1453.552	-2.1671	1.4282	-1.1941
3.588	-19.792	-44.071	1041.86	-0.46591	0.78584	-1.0075	-47.8041	30.856	56.206	0.17871	0.12256	0.044434	-41.444	-139.061	1613.398	-0.85938	1.5293	-1.6641	-70.862	-131.246	1415.838	-1.8753	1.5137	-1.1585
3.59	-13.517	-54.564	1031.29	-0.40625	0.7832	-0.96875	-52.5769	19.1932	42.0205	0.17773	0.12524	0.049805	-58.5745	-82.907	1560.031	-0.77881	1.5005	-1.6421	-74.121	-182.515	1353.935	-1.4593	1.5052	-1.1405
3.592	-0.402999999999999	-45.872	994.77	-0.35166	0.7749	-0.92197	-52.449	19.783	32.2201	0.17285	0.12354	0.047363	-42.358	-48.186	1494.8428	-0.75342	1.4868	-1.6284	2.395	-220.004	1301.867	-1.041	1.4277	-1.1016
3.594	-24.819	-46.074	969.9	-0.30918	0.75967	-0.88272	0.733000000000001	56.2383	67.186	0.16357	0.11279	0.045898	-48.778	-60.865	1440.472	-0.71338	1.4771	-1.603	58.781	-313.01	1235.905	-0.77657	1.3231	-1.044
3.596	-31.174	-45.417	917.57	-0.28808	0.73857	-0.84287	-34.3805	33.3822	42.7873	0.15869	0.099609	0.041992	-5.047	10.49506	1435.1339	-0.70044	1.4611	-1.5759	81.717	-297.57	1248.25505	-0.65088	1.1673	-0.97139
3.598	-35.112	-50.82	913.45	-0.28155	0.71846	-0.80947	-22.4128	42.7082	51.3489	0.14648	0.085938	0.042969	3.177	-22.2879	1424.763	-0.68555	1.4492	-1.5508	74.885	-260.4161	1282.8974	-0.64033	1.0005	-0.91943
3.6	-64.683	-60.866	889.784	-0.2915	0.69727	-0.78223	10.5138	52.685	42.176	0.13549	0.077392	0.044922	49.377	56.322	1410.4151	-0.6748	1.4219	-1.5117	2.6003	-165.38	1324.493	-0.71269	0.84648	-0.89785
3.602	-71.648	-71.615	861.779	-0.31748	0.68076	-0.76533	-6.6309	23.3808	2.39667	0.12256	0.067871	0.043457	5.491	32.958	1378.163	-0.66992	1.4141	-1.5	-16.379	-136.04	1345.5553	-0.82422	0.73633	-0.90234
3.604	-79.943	-81.686	836.478	-0.35361	0.6708	-0.74932	21.9315	42.6862	25.0801	0.10449	0.052734	0.039063	-40.328	50.2182	1373.743	-0.66211	1.4004	-1.4658	-4.15600000000001	-127.83	1344.639	-0.96741	0.70449	-0.92422
3.606	-89.5093	-77.628	837.407	-0.39541	0.66885	-0.7458	29.3824	40.4261	7.8278	0.097168	0.04834	0.036133	-48.072	88.378	1368.0691	-0.65576	1.3881	-1.435	38.8947	-191.25	1380.4464	-1.1187	0.72383	-0.98007
3.608	-101.8994	-95.403	826.13	-0.42764	0.6747	-0.74522	4.067	12.1819	-16.7335	0.077148	0.041016	0.039063	-28.102	58.531	1343.588	-0.65088	1.3735	-1.4058	-15.6948	-235.024	1396.632	-1.225	0.78946	-1.0715
3.61	-117.822056	-112.161	820.889	-0.45703	0.69629	-0.7627	22.223	38.0367	12.4405	0.06543	0.039063	0.04126	18.721	98.592	1322.776	-0.6582	1.3418	-1.3613	-17.5328	-309.1307	1398.156	-1.3094	0.89492	-1.1938
3.612	-103.0567	-137.625	834.087	-0.4793	0.72735	-0.78554	6.1532	22.41246	0.5846	0.053223	0.03418	0.041992	-23.9735	17.7229	1279.94	-0.66211	1.3262	-1.3398	-29.9297	-370.686	1426.122	-1.3784	1.0259	-1.3052
3.614	-119.3612	-167.7947	860.204	-0.48438	0.75977	-0.81211	13.5917	4.96	22.981	0.050781	0.044922	0.046875	-35.2923	46.9321	1274.1604	-0.66455	1.2876	-1.2944	13.669	-451.314	1486.617	-1.4351	1.1669	-1.4038
3.616	-95.46	-177.9759	869.349	-0.49297	0.8043	-0.83282	36.0026	29.1746	39.375	0.052734	0.040039	0.055176	-55.685	27.689	1235.795	-0.65918	1.25	-1.2549	59.541	-486.689	1502.528	-1.4965	1.2668	-1.4672
3.618	-139.8598	-199.933	864.02	-0.49648	0.84492	-0.85899	-14.9577	2.933	-13.1651	0.058594	0.036621	0.063477	-43.5444	46.123	1230.2587	-0.646	1.2017	-1.2163	107.937	-458.25	1522.047	-1.5679	1.3281	-1.5152
3.62	-112.848	-220.41	873.043	-0.50879	0.88672	-0.88477	16.2987	8.3621	14.7561	0.067627	0.038086	0.067871	-6.665	87.795	1173.1515	-0.62646	1.1294	-1.1636	95.313	-440.04	1534.974	-1.6479	1.3506	-1.5412
3.622	-130.678	-225.322	885.5003	-0.53008	0.91738	-0.9125	15.9211	33.5145	14.3858	0.081543	0.03418	0.075195	15.878	46.319	1121.474	-0.60645	1.0859	-1.1328	54.687	-384.12	1638.579	-1.7246	1.3477	-1.5527
3.624	-132.602	-213.1	893.327	-0.55791	0.95146	-0.93897	-27.657	-12.8488	6.7679	0.1001	0.032715	0.080566	1.248	141.869	1107.3087	-0.56689	1.0239	-1.0796	-30.4627	-327.374	1748.018	-1.7587	1.3233	-1.5454
3.626	-128.6109	-210.734	905.1089	-0.57978	0.97959	-0.96865	2.667	16.474	30.3475	0.10693	0.027344	0.084961	-30.601281	141.0976	1103.5165	-0.52978	0.97607	-1.0415	-79.878	-257.65	1806.201	-1.7706	1.2813	-1.5456
3.628	-146.6312	-209.098	934.6875	-0.60684	1.0068	-0.99473	-20.79971	34.601	1.926	0.11572	0.026367	0.090332	-35.731	218.874	1106.473	-0.49023	0.93359	-1.0029	-38.519	-199.1522	1794.541	-1.7882	1.2825	-1.5491
3.63	-130.577	-192.223	943.9621	-0.63086	1.0391	-1.0254	-52.37	20.289	7.666	0.12061	0.016602	0.091309	-36.1544	219.594	1063.056	-0.42041	0.88135	-0.95947	-116.311	-138.703	1730.9425	-1.8147	1.3185	-1.5793
3.632	-161.716	-169.391	942.262	-0.64521	1.0755	-1.0546	6.0117	42.1494	41.6122	0.125	0.012207	0.095215	-45.0267	189.944	1005.5059	-0.39258	0.8584	-0.94336	-124.336	-89.399	1673.449	-1.8711	1.3984	-1.6113
3.634	-121.477	-143.624	959.8143	-0.65459	1.112	-1.0788	-45.0592	7.368	8.2032	0.1333	0.0068359	0.10205	-23.82	223.055	959.7277	-0.33496	0.80908	-0.89355	-111.003	-12.88	1654.577	-1.9298	1.5071	-1.647
3.636	-132.533	-145.443	975.6868	-0.64522	1.1495	-1.1093	-64.478	10.9185	8.8452	0.13208	0.0014648	0.10571	-47.70691	169.966	883.181	-0.29517	0.75537	-0.85645	-51.426	28.383	1699.322	-1.9822	1.6114	-1.6851
3.638	-109.595	-137.333	999.8201	-0.62959	1.1821	-1.1249	-27.9416	43.342	5.579	0.12891	0.0073242	0.10352	-33.3745	203.584	868.114	-0.26709	0.70508	-0.82813	-46.87	-7.362	1721.052	-2.0036	1.6977	-1.7206
3.64	-98.985	-141.471	1002.21398	-0.59668	1.2036	-1.146	-58.77	15.6722	-20.278	0.14209	0.003418	0.11035	-11.851	154.419	838.05	-0.24707	0.63281	-0.78125	-18.9164	-60.544	1761.981	-1.9659	1.7357	-1.728
3.642	-116.071	-137.7785	1019.7385	-0.55595	1.2202	-1.1587	-51.291	26.2348	11.469	0.14648	0.0053711	0.10645	-8.10288	137.6462	810.2031	-0.23779	0.604	-0.75732	-25.266	-85.923	1733.812	-1.8726	1.7153	-1.7222
3.644	-92.828	-133.0924	1044.8388	-0.51758	1.2255	-1.164	-22.8224	38.035	15.4	0.15771	0.0097656	0.097656	27.8331	140.3947	761.0814	-0.22559	0.55273	-0.7207	-57.338	-30.5436	1735.435	-1.7623	1.6595	-1.7002
3.646	-102.75	-149.1697	1048.3387	-0.48125	1.2224	-1.1679	-62.018	2.8217	17.063	0.16528	0.015381	0.097411	23.5778	126.031	715.611	-0.20801	0.51929	-0.69458	-56.303	18.0231	1768.711	-1.6526	1.6048	-1.6643
3.648	-84.485	-157.8297	1025.2363	-0.46377	1.1986	-1.1566	-16.7993	30.508	42.4812	0.17236	0.020996	0.086426	18.5	193.8214	704.95324	-0.18896	0.4834	-0.67578	-115.754	35.039	1783.537	-1.5644	1.5524	-1.6253
3.65	-116.635	-170.686	1019.0523	-0.46191	1.1738	-1.1387	4.735	11.4998	11.2139	0.17139	0.04248	0.07373	18.391	170.6829	685.97052	-0.1543	0.45313	-0.65625	-136.91	-23.548	1778.374	-1.4924	1.4963	-1.5763
3.652	-100.607	-174.108	1033.9528	-0.47324	1.1356	-1.1172	-42.6559	-7.8469	11.0743	0.16357	0.056641	0.065918	29.2517	210.8615	676.682	-0.14844	0.43213	-0.63916	-122.88	-73.6139	1778.943	-1.4351	1.4458	-1.5327
3.654	-90.083	-174.595	1038.7766	-0.49463	1.0986	-1.0964	1.148	30.307	27.027	0.15625	0.078613	0.047363	28.7477	173.852	622.147	-0.11182	0.40088	-0.62402	-72.1779	-87.307	1767.104	-1.3947	1.3979	-1.4893
3.656	-114.2025	-168.3452	1024.993	-0.51689	1.0704	-1.0706	-1.63	2.5036	1.15956	0.15577	0.096438	0.030517	12.2314	147.7306	572.6412	-0.087402	0.37255	-0.59985	-60.9833	-37.2162	1750.759	-1.3671	1.3552	-1.4432
3.658	-89.576	-159.961	1017.3207	-0.53193	1.0482	-1.0475	3.676	7.71329	21.73653	0.15723	0.11621	0.022949	6.419	156.347	533.1516	-0.067871	0.35791	-0.59326	-4.453	17.9908	1690.7374	-1.3581	1.315	-1.3944
3.66	-93.232	-142.7037	998.5604	-0.53516	1.0391	-1.0342	31.1997	24.7603	18.0125	0.15625	0.14111	0.00097656	-10.408	128.051	499.5326	-0.039551	0.33105	-0.56982	2.345	3.2044	1586.279	-1.3586	1.2809	-1.3597
3.662	-77.506	-115.4349	979.1716	-0.51806	1.0374	-1.0273	-17.7273	-12.8402	10.9917	0.15479	0.1543	-0.012207	9.928	173.842	452.5364	-0.030273	0.31641	-0.55469	38.127	-19.42628	1546.799	-1.3569	1.2544	-1.3179
3.664	-126.9668	-106.07022	976.7204	-0.48994	1.036	-1.0223	12.373	27.2237	26.33084	0.146	0.18555	-0.03125	-3.645	138.094	418.1466	-0.012695	0.27832	-0.51563	51.037	-20.3416	1537.206	-1.3434	1.2199	-1.2969
3.666	-101.917	-84.401	948.8738	-0.45596	1.0302	-1.0157	32.71986	38.253	10.2805	0.14209	0.21093	-0.054443	-28.8355	123.797	386.4168	-0.0056152	0.25854	-0.49658	31.21532	66.9312	1541.982	-1.3167	1.195	-1.2854
3.668	-101.686	-75.4669	946.1777	-0.41894	1.0299	-1.0103	-2.0625	3.5091	5.8423	0.13574	0.2334	-0.076172	-27.804	91.7619	368.9823	0.00048828	0.23291	-0.47949	48.7158	120.861	1483.0447	-1.2882	1.1782	-1.2765
3.67	-96.081	-54.098	923.7214	-0.38281	1.0195	-1.0088	35.0289	33.888	14.0978	0.12354	0.26172	-0.10303	-15.65263	92.178	344.283	0.0024414	0.20605	-0.44824	26.283	178.566	1424.768	-1.2621	1.1529	-1.2666
3.672	-96.8503	-60.575	921.552	-0.34951	1.0126	-1.0023	1.167	9.4374	-4.8933	0.11816	0.27734	-0.10889	-14.295	135.4637	320.6242	0.0068359	0.19629	-0.4375	-13.81479	186.134	1372.695	-1.2358	1.1362	-1.2515
3.674	-108.2989	-69.8514	904.161	-0.32588	1.0041	-0.99414	-5.172	12.1822	0.8782	0.1001	0.30957	-0.14453	-27.549	120.289	290.5659	0.0039063	0.17041	-0.40771	-40.789	169.477	1340.631	-1.2232	1.1062	-1.2286
3.676	-82.279	-68.785	891.86	-0.30674	0.98848	-0.98555	30.7231	47.737	12.8846	0.073731	0.32642	-0.17163	-24.654	139.6328	273.361	0.0061035	0.15771	-0.39477	50.156	170.238	1336.7835	-1.2176	1.0754	-1.2022
3.678	-110.191	-70.2832	873.356	-0.28682	0.97158	-0.97451	-28.9854	10.9402	1.3053	0.043457	0.33643	-0.20068	-84.005	114.5566	255.4537	0	0.14014	-0.37158	15.136	161.958	1329	-1.2086	1.0484	-1.1775
3.68	-100.6237	-80.91082	873.7654	-0.27051	0.94727	-0.96094	-19.104	11.053	36.5741	-0.016113	0.35254	-0.24512	-54.9171	118.5921	261.9339	-0.0063477	0.10645	-0.3374	36.528	184.015	1300.954	-1.1751	1.0116	-1.1407
3.682	-93.098	-90.0498	870.8897	-0.2542	0.92861	-0.94971	-13.713	14.8112	45.1084	-0.053711	0.35156	-0.271	-38.361	108.6087	272.573	-0.019043	0.087402	-0.32227	23.9796	166.596	1219.135	-1.127	0.97461	-1.1055
3.684	-82.33	-83.8833	860.1455	-0.23935	0.90586	-0.93399	-62.105	-30.718	58.81	-0.15771	0.35596	-0.34229	-56.01	73.402	234.494	-0.038574	0.059082	-0.29541	36.332	165.925	1164.147	-1.0588	0.93086	-1.0711
3.686	-74.904	-83.6875	832.074832	-0.22607	0.88476	-0.91992	-24.6511	15.05433	144.2196	-0.26025	0.34839	-0.38623	-59.4483	96.0636	204.3514	-0.056641	0.053467	-0.2898	8.737708	139.162	1130.491	-0.99485	0.90361	-1.0405
3.688	-73.273	-71.672	814.7136	-0.20332	0.86758	-0.91152	-59.9768	15.5603	207.8631	-0.39209	0.36572	-0.44092	-58.648	85.574	137.943	-0.061523	0.04248	-0.27197	31.585	116.45	1145.232	-0.93701	0.87549	-1.0054
3.69	-64.658	-66.402	811.0855	-0.1875	0.84961	-0.89844	-91.6198	-5.5253	281.053	-0.60791	0.39014	-0.53076	-50.0075	110.3295	93.079	-0.073242	0.021973	-0.24561	28.3147	144.08	1114.17	-0.8916	0.84746	-0.98027
3.692	-83.056	-59.248	773.2635	-0.16806	0.82715	-0.88066	-65.14	48.04	411.649	-0.73389	0.41064	-0.57568	-50.446	84.6711	96.313	-0.077148	0.0053711	-0.22461	-25.6624	202.003	1051.486	-0.84424	0.81494	-0.94775
3.694	-69.27	-52.4109	753.2215	-0.14336	0.80791	-0.86455	-87.58265	43.216	526.995	-0.9917	0.4458	-0.646	-11.667	61.696	103.1065	-0.075684	0.0092773	-0.20752	-5.039	245.8245	981.8365	-0.79326	0.7874	-0.9251
3.696	-61.349	-46.7431	720.6681	-0.1336	0.7876	-0.8458	-80.39753	76.205	714.174	-1.2087	0.50952	-0.70532	-31.544	64.58342	114.6017	-0.075683	0.003418	-0.20044	-30.5226	279.666	900.626	-0.74248	0.75518	-0.89483
3.698	-49.319	-26.975	715.9873	-0.11992	0.76455	-0.83193	-66.709	110.4746	893.3515	-1.4194	0.58252	-0.74756	-1.937	63.689	104.552	-0.072754	0.003418	-0.18945	-15.102	305.614	859.597	-0.67686	0.72119	-0.86201
3.7	-54.771	-7.499	703.6843	-0.11084	0.74463	-0.81396	-90.6137	56.4657	989.8295	-1.6719	0.71289	-0.81543	-6.5514	100.769	106.9644	-0.061523	-0.0039063	-0.17285	-4.543	319.464	843.7575	-0.61563	0.68203	-0.83086
3.702	-71.203	-6.481	678.8935	-0.10771	0.71944	-0.79619	-106.9327	69.203	1035.0514	-1.7676	0.78027	-0.82813	-36.625	97.546	100.1372	-0.052246	-0.015137	-0.15576	-9.2839	327.702	821.7067	-0.55469	0.64063	-0.80273
3.704	-68.062	-15.9888	642.952	-0.1042	0.69483	-0.77725	-86.063354	32.013	1053.199	-1.8613	0.91699	-0.83203	5.585	109.843	79.0778	-0.043457	-0.020996	-0.13477	-47.0991	322.21	766.063	-0.48545	0.59268	-0.75791
3.706	-67.207	-9.6774	632.275	-0.10108	0.67334	-0.76358	-128.7442	-23.841	1070.366	-1.8335	1.0298	-0.82861	-8.349	105.495	58.17023	-0.037353	-0.035644	-0.1228	5.88	311.946	706.994	-0.41797	0.53985	-0.71778
3.708	-63.658	-4.705	614.0543	-0.096387	0.65039	-0.74492	-100.457	-8.803	1076.423	-1.7871	1.1777	-0.86914	-4.85	74.726	30.675	-0.024414	-0.047852	-0.11963	-7.2116	295.84	634.098	-0.35977	0.4875	-0.67558
3.71	-95.2647	-5.0884	594.8349	-0.10107	0.62549	-0.72803	-83.9241	-37.04	1025.182	-1.6758	1.334	-0.95117	-6.0399	63.717	44.099	-0.0063477	-0.064453	-0.090332	14.0341	270.3709	595.8363	-0.31816	0.45039	-0.6414
3.712	-50.598	-6.1916	582.2761	-0.09756	0.60859	-0.70957	-108.683	-34.2264	1016.5395	-1.5874	1.3813	-0.98193	7.174	17.2811	58.23	0.0041504	-0.076172	-0.081543	22.12	247.905	539.558	-0.28125	0.41992	-0.61523
3.714	-74.723	-0.767000000000001	561.028	-0.09043	0.59218	-0.6955	-50.423	-25.026	1067.857	-1.375	1.3887	-0.97363	-15.889	31.644	50.4989	0.015137	-0.092285	-0.072266	-17.8073	232.307	470.666	-0.23028	0.37763	-0.57295
3.716	-68.488	4.7917	544.6403	-0.089648	0.57031	-0.6791	-48.7743	-91.8368	1069.744	-1.2478	1.3196	-0.91674	-2.975	29.5419	31.8531	0.023438	-0.10938	-0.055664	-4.272	218.906	450.32	-0.18828	0.34942	-0.55742
3.718	-72.148	-10.6875	536.1633	-0.080957	0.54951	-0.6585	-20.46	-122.09	1091.124	-1.1831	1.2134	-0.854	7.639	50.0253	20.603	0.022949	-0.12939	-0.049316	1.4978	193.5524	467.08053	-0.14258	0.3209	-0.54883
3.72	-75.453	-9.1344	524.3618	-0.074707	0.52881	-0.64404	-4.313	-128.792	1077.2024	-1.2065	1.022	-0.82568	-43.847	35.069	41.21	0.035156	-0.14453	-0.035645	33.1906	186.2675	478.985	-0.085549	0.26826	-0.51338
3.722	-77.463	-5.6936	502.1338	-0.073535	0.50732	-0.62861	-24.719	-150.983	1104.564	-1.2578	0.95313	-0.81836	-7.411	33.418	55.035	0.044434	-0.15967	-0.02832	-20.3709	156.3158	427.132	-0.027344	0.22998	-0.49365
3.724	-84.319	3.8175	487.0605	-0.070215	0.48809	-0.60654	-25.317	-115.473	1185.491	-1.3262	0.98047	-0.72461	-27.33	54.845	63.532	0.05957	-0.16943	-0.024414	27.1699	163.1878	363.7274	0.01582	0.18379	-0.48164
3.726	-88.605	4.384	485.8518	-0.06709	0.4623	-0.58388	-67.399	-98.78	1205.929	-1.4009	0.98096	-0.74169	-32.4231	34.788	52.02	0.084473	-0.1792	-0.022461	-20.2428	125.2471	301.8306	0.060547	0.13623	-0.45781
3.728	-82.7957	10.84955	471.5416	-0.068555	0.44307	-0.56719	-84.8563	-142.41	1207.8031	-1.4663	0.979	-0.79248	-25.2986	29.3673	43.5158	0.09668	-0.18164	-0.012207	0.194999999999999	153.8496	282.918	0.089453	0.091699	-0.44375
3.73	-78.113	18.801	451.1124	-0.07373	0.42627	-0.55078	-34.69	-170.677	1217.113	-1.5269	1.0298	-0.85889	-67.554	10.6602	27.6094	0.11621	-0.18652	-0.0078125	-9.788	171.281	246.773	0.090137	0.072363	-0.45352
3.732	-96.748	21.5856	432.835	-0.068457	0.40645	-0.53525	-49.65	-238.375	1184.733	-1.5601	1.0503	-0.89795	-57.563	17.266	-5.027	0.12744	-0.18505	-0.0085449	2.603	133.8345	227.691	0.10107	0.025391	-0.43359
3.734	-91.9101	11.8876	426.1119	-0.064746	0.38447	-0.51865	-94.461	-289.35	1228.682	-1.6011	1.0991	-0.98779	-58.334	35.31	19.771	0.14258	-0.18945	-0.0087891	15.887	108.9887	181.718	0.096876	-0.0051758	-0.41045
3.736	-67.096	23.76975	411.6189	-0.062793	0.36611	-0.49561	-50.559	-294.119	1274.617	-1.627	1.1211	-1.0523	-32.938	28.0717	26.725	0.15869	-0.19434	0.0019531	-28.20429	91.039	148.624	0.080957	-0.025391	-0.40537
3.738	-82.254	38.7557	388.5783	-0.068066	0.34981	-0.48662	-69.441	-333.323	1282.6	-1.6582	1.1211	-1.0947	-49.819	28.6454	27.001	0.16504	-0.20068	0.0092773	-14.3126	123.359	114.737	0.047363	-0.032813	-0.41162
3.74	-80.463	28.7726	380.6226	-0.067383	0.3374	-0.4707	-47.548	-329.283	1330.751	-1.7104	1.1021	-1.1411	-45.1049	4.3515	37.795	0.17529	-0.21045	0.020996	-27.651	134.7518	87.056	0.018946	-0.043554	-0.40313
3.742	-59.925	28.979	378.0782	-0.066308	0.32354	-0.45909	34.309	-309.722	1347.9363	-1.7437	1.1157	-1.144	-18.096	17.098	12.2009	0.17993	-0.20996	0.01123	-40.032	140.586	85.4982	-0.0073242	-0.032715	-0.40381
3.744	-60.573	31.455	379.4928	-0.064746	0.31104	-0.44385	0.212000000000003	-308.481	1387.462	-1.8462	1.1431	-1.1812	-61.432	16.5123	5.2403	0.18896	-0.20703	0.0043945	-85.981	86.6246	80.3693	-0.045313	-0.011524	-0.40967
3.746	-78.763	34.086	371.7889	-0.063965	0.29384	-0.42901	-31.062	-228.792	1479.459	-1.9099	1.1789	-1.2322	-3.87	21.682	13.2008	0.19238	-0.19922	-0.0087891	-46.7438	78.8665	60.152	-0.085058	0.0091797	-0.41934
3.748	-66.194	29.8492	367.796	-0.063281	0.27734	-0.41133	-48.278	-179.0254	1536.0856	-1.9531	1.2324	-1.25	-57.0162	8.061	20.353	0.2041	-0.20313	-0.016602	-55.408	77.4322	38.877	-0.12178	0.039648	-0.42949
3.75	-62.303	16.0665	370.9974	-0.066895	0.26611	-0.39844	-76.7798	-172.953	1573.7838	-2.0254	1.3262	-1.29	-23.503	7.338	18.208	0.21875	-0.20166	-0.018555	-44.229	107.3928	47.9472	-0.14892	0.058008	-0.43106
3.752	-70.1578	27.4072	341.171	-0.068359	0.25488	-0.38974	-83.867	-154.05	1632.898	-2.0586	1.375	-1.3086	-18.2101	14.5252	15.818	0.23095	-0.20508	-0.019043	-73.088	95.0841	63.8429	-0.16846	0.074219	-0.42139
3.754	-56.948	24.04229	342.15849	-0.067481	0.2417	-0.37608	-98.4992	-154.052	1598.7661	-2.1167	1.481	-1.3472	-8.724	13.2762	38.666	0.23877	-0.19971	-0.027832	-72.3642	73.1085	76.018	-0.18428	0.088672	-0.42041
3.756	-74.34	27.5613	325.83275	-0.070996	0.22373	-0.35459	-130.254	-138.635	1591.00184	-2.1641	1.5528	-1.3784	-5.968	28.8235	11.2646	0.25195	-0.19043	-0.043945	-57.077	49.695	32.811	-0.20381	0.10108	-0.41592
3.758	-59.693	28.3534	307.5924	-0.068652	0.20908	-0.34209	-120.756	-83.833	1600.6535	-2.207	1.6152	-1.3936	-31.643	39.479	18.44573	0.25928	-0.18311	-0.048828	-46.1872	8.5926	14.028	-0.21631	0.10928	-0.40342
3.76	-57.719	36.9318	313.6693	-0.068848	0.2002	-0.33398	-115.724	-104.386	1576.582	-2.25	1.6855	-1.418	2.407	41.9256	-19.8833	0.28076	-0.17871	-0.061523	-8.1438	2.7533	2.6637	-0.22392	0.10693	-0.38936
3.762	-60.395	32.4461	296.0481	-0.070801	0.18603	-0.3208	-99.45258	-130.33737	1644.5649	-2.2632	1.7075	-1.4233	-9.347	35.218	-15.664	0.29272	-0.16748	-0.078369	-39.8446	1.676	17.69	-0.22314	0.096191	-0.37061
3.764	-64.988	31.2931	305.0186	-0.070117	0.17402	-0.31025	-81.265	-131.596	1656.987	-2.271	1.7427	-1.4253	19.213	17.4205	21.4918	0.30664	-0.15283	-0.093262	-39.4916	29.9662	14.692	-0.22461	0.090332	-0.36016
3.766	-51.632	27.2028	301.0877	-0.073242	0.15957	-0.29541	-81.2358	-164.003	1667.285	-2.2497	1.7492	-1.4104	-2.056	22.316	22.821	0.3125	-0.14893	-0.10352	-72.815	24.1054	9.661	-0.2209	0.071094	-0.34463
3.768	-57.992	37.0475	275.547	-0.071875	0.14834	-0.28496	-54.216	-136.428	1750.845	-2.2188	1.7461	-1.3945	-9.591	13.2642	26.8806	0.31641	-0.14209	-0.11572	-0.8615	48.081	3.627	-0.21269	0.060156	-0.32509
3.77	-84.5093	45.2032	263.453	-0.076172	0.13428	-0.2749	-75.6164	-123.059	1725.395	-2.1382	1.7134	-1.3599	11.919	47.9418	-3.631	0.32178	-0.13086	-0.13428	9.605	45.223	22.4032	-0.19912	0.041699	-0.31142
3.772	-63.883	32.3425	272.029	-0.074512	0.13047	-0.26738	-101.9406	-128.487	1742.192	-2.0718	1.6841	-1.3257	-20.373	49.529	11.85656	0.3147	-0.12353	-0.14966	24.407	69.296	61.235	-0.17822	0.032715	-0.29395
3.774	-63.917	38.0928	266.4995	-0.076562	0.1248	-0.26328	-103.803	-75.122	1733.137	-2.0059	1.6387	-1.293	-23.381	47.787	20.7359	0.30957	-0.11084	-0.16748	9.823	62.256	60.692	-0.15361	0.019922	-0.26914
3.776	-76.444	47.241	261.2112	-0.070703	0.10957	-0.24805	-115.801	-87.268	1679.887	-1.9219	1.5859	-1.2422	-33.616	43.4847	23.1082	0.2959	-0.093262	-0.19629	-2.971	59.155	65.954	-0.12383	0.0076172	-0.25224
3.778	-73.909	47.647	265.9198	-0.072852	0.09375	-0.23437	-90.76381	-92.574	1728.94	-1.8843	1.5591	-1.2163	-19.712	39.923	40.1491	0.28906	-0.08252	-0.21045	-17.8469	34.4631	36.2392	-0.095314	0.0099608	-0.23623
3.78	-68.5285	37.972	279.0569	-0.071289	0.085938	-0.22461	-82.702	-73.573	1701.7217	-1.8281	1.5039	-1.1719	-28.201	32.2385	4.718	0.2793	-0.056641	-0.23535	-3.703	-17.3742	16.04866	-0.070215	0.0089846	-0.22607
3.782	-59.879	30.8947	281.25305	-0.072558	0.083008	-0.22793	-107.275154	-105.418	1633.37	-1.7986	1.4729	-1.1365	-48.238	13.6385	62.819	0.27319	-0.034179	-0.25562	32.719	-10.4668	0.2102	-0.019531	-0.031738	-0.17627
3.784	-60.713	34.1467	268.3513	-0.076953	0.077637	-0.22295	-73.4575	-79.791	1603.462	-1.7813	1.4482	-1.1133	-43.9107	17.6797	10.724	0.25977	-0.0029297	-0.28174	-1.194	-23.0216	9.91015	0.033984	-0.057325	-0.15527
3.786	-68.223	32.436	265.0471	-0.082422	0.06748	-0.21865	-74.3055	-54.548	1555.127	-1.7554	1.4224	-1.0894	-46.064	37.2381	9.804	0.24756	0.020508	-0.30469	-16.332	7.4138	20.431	0.079492	-0.082519	-0.14102
3.788	-59.98	33.2495	257.4561	-0.087598	0.060742	-0.21494	-70.132	-76.113	1541.441	-1.7363	1.4141	-1.0771	-39.729	46.6301	14.37	0.24316	0.034668	-0.31934	-47.172	-19.3416	27.5877	0.11465	-0.090332	-0.14063
3.79	-47.83	36.6818	281.9902	-0.092773	0.054199	-0.21045	-31.487	-22.5015	1549.6094	-1.6953	1.3906	-1.0566	-47.8898	39.77155	18.6915	0.22363	0.061035	-0.3501	-10.1223	-2.4623	30.309	0.15742	-0.11846	-0.10791
3.792	-59.908	40.0286	278.205	-0.094043	0.055859	-0.21162	-43.662	11.8548	1514.3793	-1.6521	1.3723	-1.0417	-63.8197	22.0378	58.199	0.20801	0.078614	-0.36938	8.4707	-20.5654	20.0766	0.19287	-0.12891	-0.087891
3.794	-66.6527	31.6773	280.8325	-0.095898	0.047656	-0.20615	-61.523	14.5814	1518.5092	-1.6074	1.3613	-1.0176	-26.2162	34.8896	35.054062	0.18848	0.097656	-0.37939	13.41	15.9	34.204	0.23291	-0.14697	-0.071094
3.796	-38.426	32.2407	285.0184	-0.10058	0.043359	-0.20537	-54.9349	49.567	1518.0617	-1.5488	1.3291	-0.99316	-40.6413	34.285	43.604	0.15576	0.12793	-0.40527	-26.643	18.84586	32.8028	0.26074	-0.14658	-0.066699
3.798	-46.466	34.3821	297.0192	-0.097754	0.034766	-0.204	-73.042	22.0482	1473.199	-1.519	1.3091	-0.97998	-32.684	50.4217	18.673	0.13721	0.13525	-0.41113	-47.0365	8.798	25.8902	0.27715	-0.14658	-0.063965
3.8	-67.941	46.8269	292.0827	-0.10059	0.035645	-0.21143	-107.69824	17.558	1481.3727	-1.4629	1.2676	-0.94727	-31.171	39.669	34.72518	0.092773	0.15381	-0.43018	-62.405	2.483	13.095	0.30352	-0.16338	-0.051465
3.802	-68.245	53.1818	278.1587	-0.10078	0.041016	-0.21387	-64.433	41.4423	1438.483	-1.4162	1.2478	-0.92261	-39.772	22.2383	29.11	0.055908	0.17212	-0.45605	-38.1001	15.135	-20.8796	0.33008	-0.19189	-0.027832
3.804	-38.813	60.514	278.9642	-0.10537	0.041016	-0.21865	-60.434	0.0599999999999987	1389.472	-1.3765	1.2192	-0.90283	-16.237	14.8515	42.737	-0.0014648	0.17773	-0.48291	-32.804	61.02082	-28.3107	0.3501	-0.20029	-0.023535
3.806	-55.114	71.381	281.0826	-0.11201	0.044531	-0.22373	-71.8145	0.0808	1389.922	-1.3159	1.1763	-0.87061	-36.4582	12.5022	126.175	-0.079102	0.19482	-0.50537	-59.219642	54.1966	3.549	0.35713	-0.1999	-0.04082
3.808	-46.21	69.087	291.68184	-0.11738	0.051953	-0.22343	-63.67218	-2.7	1323.633	-1.2891	1.1563	-0.85254	12.1614	21.1162	147.9602	-0.13428	0.19971	-0.51953	-77.9081	72.102	-18.076	0.36689	-0.20928	-0.047461
3.81	-57.064	63.7513	302.3213	-0.12598	0.057617	-0.22461	-85.7448	-15.194	1326.9165	-1.2363	1.1133	-0.8252	-3.9588	15.826	198.604	-0.25098	0.18359	-0.56982	-98.005	47.047	-16.628	0.38008	-0.23145	-0.035547
3.812	-57.403	61.9995	312.7291	-0.12939	0.065039	-0.23145	-61.094	59.085	1334.132	-1.1973	1.0806	-0.8003	22.0957	35.028582	221.6243	-0.34839	0.20019	-0.63941	-23.4807	50.583	-6.2354	0.3877	-0.24414	-0.023926
3.814	-53.216	67.32651	323.0013	-0.1375	0.073731	-0.24365	-57.7321	66.97	1274.3994	-1.1577	1.0474	-0.77881	43.479	64.3392	289.213	-0.4707	0.18164	-0.69971	-38.1817	16.1247	7.2834	0.38154	-0.23457	-0.041699
3.816	-63.232	53.4434	329.2898	-0.14688	0.078809	-0.24599	-49.334	65.124	1259.9611	-1.1108	0.99658	-0.74951	39.18	66.3931	453.709	-0.67871	0.17627	-0.78125	-4.366	39.249	48.6725	0.36982	-0.23008	-0.054004
3.818	-72.148	50.2073	336.976	-0.14922	0.090332	-0.25293	-56.8213	115.25	1215.80058	-1.0898	0.97559	-0.73438	46.237	75.353	599.67	-0.81641	0.18115	-0.83105	-51.745	39.127	52.4957	0.37295	-0.22969	-0.044629
3.82	-71.867	60.334	325.3743	-0.15186	0.104	-0.25928	-68.368	113.825	1163.1616	-1.0444	0.92236	-0.70752	43.43	35.0651	779.3533	-1.1382	0.24463	-0.96338	-26.7363	50.4066	15.44	0.3667	-0.22032	-0.043652
3.822	-63.054	59.523	327.3904	-0.15781	0.11524	-0.2664	-64.504	154.401	1172.065	-1.0107	0.88476	-0.68555	113.874	16.756	873.716	-1.4002	0.31665	-1.0691	-4.294	48.698	7.453	0.35254	-0.21191	-0.055664
3.824	-98.9324	55.6712	330.2829	-0.16386	0.12754	-0.27031	-58.6822	181.914	1126.58598	-0.97461	0.84961	-0.66699	50.600462	-5.4432	1023.6804	-1.6406	0.39648	-1.1582	-14.443	47.083	38.93	0.34697	-0.19444	-0.06709
3.826	-93.767	55.195	349.278	-0.17012	0.13965	-0.28125	-64.4423	148.058	1087.352	-0.91553	0.80322	-0.63818	43.79	-8.729	1111.9239	-1.9297	0.58008	-1.293	12.545	44.851	47.674	0.33935	-0.18564	-0.076269
3.828	-67.554	62.7996	355.334	-0.17881	0.15156	-0.28897	-30.586	169.536	1060.8591	-0.89258	0.78125	-0.625	31.735	-7.788	1135.4279	-2.0151	0.70166	-1.3354	0.800000000000001	8.8015	63.809	0.33545	-0.17666	-0.077051
3.83	-93.37361	68.2377	371.1774	-0.18311	0.16113	-0.29834	-37.9274	154.685	980.5636	-0.82813	0.74121	-0.58691	0.983999999999998	-24.4	1176.74	-2.1226	1.0376	-1.4702	1.001	18.7467	35.574	0.32969	-0.16699	-0.080567
3.832	-87.085	60.5171	388.6455	-0.19414	0.17353	-0.3043	-27.003	138.21	968.5974	-0.78393	0.70434	-0.56176	25.3441	-34.007	1176.456	-2.1338	1.2637	-1.5567	-22.4483	-30.616509	38.83101	0.31641	-0.16406	-0.088379
3.834	-71.999	67.24761	393.5473	-0.20596	0.18467	-0.31475	2.132	157.3	941.8733	-0.75195	0.66406	-0.5459	-4.4185	-85.478	1255.547	-2.082	1.4414	-1.666	29.0741	17.6253	48.012	0.29736	-0.15889	-0.09209
3.836	-76.087	85.249	390.1443	-0.2126	0.20108	-0.32724	-37.8489	124.1697	871.63	-0.70557	0.61865	-0.51514	12.7068	-102.986	1305.2132	-1.7817	1.5181	-1.7183	0.507000000000001	16.1508	30.3034	0.27207	-0.15342	-0.10059
3.838	-89.749	89.773	387.2409	-0.21934	0.21279	-0.3334	-17.391362	131.822	860.5137	-0.68555	0.59668	-0.50586	-11.5404	-104.6282	1337.144	-1.5503	1.481	-1.6851	-5.487	47.641	28.75	0.23809	-0.14756	-0.10879
3.84	-84.36	91.136	408.8521	-0.229	0.23291	-0.34521	17.576	160.91349	821.8041	-0.63818	0.5415	-0.479	11.065	-95.8262	1366.30514	-1.0957	1.2422	-1.5449	-5.063	26.4854	27.535	0.20196	-0.1457	-0.11719
3.842	-82.141	87.2549	424.515	-0.2373	0.25215	-0.3541	-29.1315	130.35	795.5495	-0.60864	0.50611	-0.46899	14.2386	-87.1739	1344.856	-0.83593	1.0254	-1.4595	-17.2186	6.19295	33.5659	0.16846	-0.13916	-0.12402
3.844	-89.009	77.581	440.9809	-0.24805	0.271	-0.36484	8.642	156.8238	808.577	-0.5708	0.46582	-0.43848	-16.742	-92.184	1369.636	-0.64014	0.86182	-1.437	3.269	-8.3434	26.13797	0.14199	-0.13037	-0.13242
3.846	-89.146	71.7358	443.7751	-0.25469	0.28311	-0.37383	-8.367	178.968	748.931	-0.52197	0.42139	-0.40723	-33.463	-39.979	1402.955	-0.44189	0.75439	-1.4507	24.6503	-6.239	27.6303	0.12461	-0.1252	-0.14326
3.848	-94.07964	68.103	445.4723	-0.26123	0.29815	-0.38252	-36.658	170.194	695.371	-0.49805	0.39063	-0.40234	-76.081	39.346	1441.183	-0.35938	0.71582	-1.4492	-22.758	10.936	11.0568	0.11055	-0.12012	-0.15576
3.85	-75.822	74.09222	450.9584	-0.26709	0.31299	-0.39014	19.3742	191.567	666.159	-0.45166	0.34961	-0.37598	-82.6	55.044	1452.2511	-0.24268	0.64551	-1.4253	-48.4605	-18.7398	11.1357	0.10029	-0.11338	-0.15977
3.852	-76.786	93.229	468.6648	-0.27227	0.32949	-0.40196	13.5006	153.02	612.275639	-0.41797	0.32178	-0.35986	-110.339	70.973	1406.995	-0.2002	0.625	-1.4023	-51.2509	5.9963	-8.9072	0.086426	-0.1123	-0.16943
3.854	-84.713	83.229	473.2655	-0.2792	0.34404	-0.41123	-6.464	144.8349	584.7102	-0.38623	0.30371	-0.34814	-122.391	-29.544	1392.004	-0.19336	0.62793	-1.4023	-50.0259	-7.3606	-12.1166	0.069922	-0.11601	-0.17784
3.856	-76.541	77.6091	484.8605	-0.28467	0.35576	-0.42529	24.884	159.4725	546.2323	-0.35449	0.25	-0.3457	-111.425	-91.415	1351.995	-0.20947	0.65088	-1.4136	-19.7795	36.8666	-15.9108	0.045801	-0.11729	-0.19043
3.858	-57.417	70.7448	505.5464	-0.28349	0.37392	-0.43623	-21.1332	131.958	490.853	-0.32959	0.23193	-0.33105	-113.1578	-109.906	1404.09	-0.22412	0.67432	-1.4117	-28.2819	19.6482	26.3911	0.017676	-0.12237	-0.20176
3.86	-78.135	76.1564	531.2405	-0.27783	0.3877	-0.44678	-9.9781	150.941	481.7339	-0.27441	0.21191	-0.27881	-87.371	-140.898	1402.6882	-0.24365	0.69385	-1.4194	-62.899	41.3442	26.0841	-0.020019	-0.12422	-0.21524
[truncated: 28,070 more rows]
