# Supplementary material for: Reliability and Validity of Running Cadence and Stance Time Derived from Instrumented Wireless Earbuds
Source: Sensors (Basel). 2021 Nov 30;21(23):7995. doi: 10.3390/s21237995 (PMC8659722; doi:10.3390/s21237995)
Supplement: Supplementary file 1 [file sensors-21-07995-s001.zip › Data_P12_speeds_2.csv]

time	S7kmh_force_plate_1	S7kmh_force_plate_2	S7kmh_force_plate_3	S7kmh_earbuds_1	S7kmh_earbuds_2	S7kmh_earbuds_3	S10kmh_force_plate_1	S10kmh_force_plate_2	S10kmh_force_plate_3	S10kmh_earbuds_1	S10kmh_earbuds_2	S10kmh_earbuds_3	S13kmh_force_plate_1	S13kmh_force_plate_2	S13kmh_force_plate_3	S13kmh_earbuds_1	S13kmh_earbuds_2	S13kmh_earbuds_3	max_force_plate_1	max_force_plate_2	max_force_plate_3	max_earbuds_1	max_earbuds_2	max_earbuds_3
0	-27.939	55.4344	299.908	-0.17607	0.14209	-0.1751	-43.756	41.7611	65.847	0.104	-0.066895	-0.04834	-71.671	55.44	1532.424	-1.3213	1.4941	-1.3281	-71.6802	0.6346	38.843	NaN	NaN	NaN
0.002	-26.441	62.542	305.215	-0.16641	0.1418	-0.16582	-57.135	41.0967	15.91	0.10913	-0.065185	-0.043213	-85.182	84.863	1521.576	-1.2729	1.4966	-1.3081	-60.268	72.54	4.4883	NaN	NaN	NaN
0.004	-28.283	61.296	284.415	-0.15479	0.14404	-0.16211	-79.7078	35.783	11.43	0.11279	-0.063965	-0.047852	-47.017	53.2089	1463.035	-1.2319	1.4902	-1.2876	-54.554	10.7578	27.884	NaN	NaN	NaN
0.006	-14.943	60.474	304.105	-0.13887	0.14199	-0.16133	-50.127	28.784	31.7399	0.11963	-0.069336	-0.029785	-83.648	66.067	1466.012	-1.1929	1.4712	-1.2651	-28.432	76.151	6.282	NaN	NaN	NaN
0.008	-37.387	54.517	311.935	-0.12539	0.1417	-0.1582	-55.196	26.0137	32.473	0.12305	-0.071777	-0.021973	-45.6	65.973	1428.632	-1.146	1.4282	-1.23	-50.374	20.29694	42.5524	NaN	NaN	NaN
0.01	-34.335	51.663	298.811	-0.11211	0.1499	-0.15351	-71.2649	20.2413	24.7195	0.12939	-0.073242	-0.016113	-56.704	87.942	1433.227	-1.1035	1.3911	-1.208	7.404	74.591	17.559	NaN	NaN	NaN
0.012	-10.581	50.73	288.568	-0.10303	0.14189	-0.15693	-42.109	22.4007	29.408	0.13501	-0.073486	-0.013672	-61.631	92.7192	1394.67	-1.0679	1.3442	-1.1792	-46.915	5.8073	42.77	NaN	NaN	NaN
0.014	-22.702	47.1843	272.411	-0.094238	0.14844	-0.1543	-54.364	29.07626	18.5682	0.14404	-0.085449	0	-100.1978	126.244	1385.4411	-1.0171	1.2759	-1.1401	-15.639	72.1792	0.395	NaN	NaN	NaN
0.016	-25.578	38.7781	273.467	-0.095508	0.13848	-0.16514	-63.6301	22.8039	26.154	0.15479	-0.092773	0.016602	-73.84	134.5961	1342.315	-1.0039	1.25	-1.1182	-25.786	5.902	27.31	NaN	NaN	NaN
0.018	-46.774	40.9778	261.69	-0.076758	0.17334	-0.14043	-40.264	36.5105	20.853	0.15771	-0.096191	0.020996	-21.963	125.6735	1351.695	-0.96875	1.1846	-1.0762	-14.103	65.1178	4.489	NaN	NaN	NaN
0.02	-6.537	41.9822	273.192	-0.10489	0.12217	-0.18183	-63.12119	47.189	4.794	0.14551	-0.11035	0.020508	-17.814	124.088	1309.1153	-0.93799	1.1387	-1.0517	-55.296	16.4304	37.6402	NaN	NaN	NaN
0.022	-14.007	49.75	279.778	-0.078906	0.17061	-0.14736	-39.854	31.6035	16.06	0.14624	-0.12378	0.026367	-40.073	131.853	1297.417	-0.90625	1.0996	-1.0176	12.699	87.979	38.918	NaN	NaN	NaN
0.024	-21.139	45.5138	300.933	-0.10547	0.13965	-0.17334	-21.202	32.3094	5.77	0.14209	-0.13623	0.032227	-58.6881	158.936	1237.929	-0.85693	1.0493	-0.97607	-59.7916	33.099	74.2152	NaN	NaN	NaN
0.026	-28.671	42.63	302.857	-0.084766	0.14961	-0.16524	-42.144	32.7072	3.053	0.13428	-0.15527	0.04248	-35.667	187.3717	1171.443174	-0.82666	1.0278	-0.96045	-45.767	55.087	54.434	NaN	NaN	NaN
0.028	-22.742	38.447	307.637	-0.09912	0.14951	-0.18291	-21.36	35.4626	26.43082	0.13086	-0.16406	0.053711	-51.4889	221.1181	1132.637	-0.771	0.98096	-0.92041	-71.51657	-19.1852	107.369	NaN	NaN	NaN
0.03	-11.231	37.2251	302.85	-0.074901	0.16436	-0.16338	-25.448	37.4497	24.1511	0.12109	-0.16943	0.049805	-7.242	200.331	1118.5877	-0.7373	0.93945	-0.88769	-61.406	11.701	101.39	NaN	NaN	NaN
0.032	-27.472	50.412	303.333	-0.076074	0.15508	-0.16806	-32.556	25.274	35.6847	0.10865	-0.17066	0.043701	-18.557	214.125	1073.857	-0.70703	0.89648	-0.85596	-74.86	-39.4258	161.852	NaN	NaN	NaN
0.034	-34.307	37.3902	296.975	-0.09082	0.14209	-0.20166	-4.851	33.9367	36.8239	0.10791	-0.16992	0.042969	-18.843	220.585	1010.3494	-0.67529	0.84229	-0.82764	-25.773	10.944	181.66	NaN	NaN	NaN
0.036	-27.45	41.1849	306.984	-0.055371	0.2085	-0.15567	-6.76600000000001	43.266	6.4739	0.11133	-0.15723	0.041504	-85.591	261.381	972.883	-0.65576	0.81836	-0.81055	-94.5099	-40.8902	267.9309	NaN	NaN	NaN
0.038	-24.722	53.0312	316.234	-0.068457	0.16084	-0.19346	-28.257	37.289	18.448	0.1167	-0.14893	0.037109	-61.1085	248.684	920.764	-0.61719	0.76758	-0.76953	-82.369	10.6766	321.269	NaN	NaN	NaN
0.04	-33.996	53.6938	309.795	-0.054785	0.19599	-0.18408	-21.363	52.73	16.825	0.12598	-0.13721	0.034668	-42.869	255.625	900.9136	-0.58789	0.73779	-0.74267	-114.992	-26.6516	479.487	NaN	NaN	NaN
0.042	-27.887	47.2956	332.342	-0.078809	0.17949	-0.20694	-26.379	54.498	3.878	0.13256	-0.12867	0.031982	-23.103	229.77353	826.343179	-0.55664	0.70752	-0.71533	-82.86	58.7717	613.72	NaN	NaN	NaN
0.044	-15.839	35.824	358.743	-0.070313	0.20557	-0.18994	-17.739	37.52341	41.1222	0.13721	-0.12012	0.033691	12.001	244.142	797.48401	-0.50586	0.66406	-0.68652	-87.1555	44.4021	803.842	NaN	NaN	NaN
0.046	-25.256	52.13	338.448	-0.10176	0.17656	-0.20791	-20.689	42.4835	32.477	0.14795	-0.11035	0.029785	-23.891	224.9063	745.1258	-0.47949	0.65137	-0.67041	-40.23	87.321	957.561	NaN	NaN	NaN
0.048	-25.891	47.613	344.162	-0.11992	0.17383	-0.21533	-53.831	36.1561	34.2173	0.14502	-0.11133	0.019531	-40.908	227.992881	732.584	-0.41797	0.60156	-0.64063	-105.895	48.8098	1108.445	NaN	NaN	NaN
0.05	-27.764	50.305	344.361	-0.12617	0.2082	-0.19932	-28.198	27.9679	56.948	0.14258	-0.10254	0.029297	-47.635	196.782	669.938	-0.3728	0.56445	-0.62133	-85.462	83.45	1218.829	NaN	NaN	NaN
0.052	-22.298	48.677	357.233	-0.1585	0.17373	-0.22187	-18.14	55.346	15.4158	0.14599	-0.099123	0.030762	-16.59	196.8933	618.4953	-0.32275	0.52197	-0.59326	-117.721	7.235	1347.515	NaN	NaN	NaN
0.054	-36.486	56.55	353.075	-0.1582	0.20264	-0.1958	-54.3715	53.955	22.29334	0.14502	-0.095215	0.026855	-11.475	185.575	571.6769	-0.27246	0.47266	-0.56543	-117.935	16.998	1366.336	NaN	NaN	NaN
0.056	-36.837	53.962	353.864	-0.20195	0.18603	-0.22735	-43.901	49.892	35.2268	0.14844	-0.092773	0.026367	-10.827	190.7141	526.515	-0.24561	0.44678	-0.55029	-156.686	-88.612	1364.958	NaN	NaN	NaN
0.058	-14.01	53.8395	373.538	-0.2083	0.2165	-0.20967	-43.461	47.8408	9.393	0.1543	-0.092285	0.023438	-35.654	197.2859	492.652	-0.19238	0.38672	-0.5127	-93.7	-122.744	1264.156	NaN	NaN	NaN
0.06	-16.415	50.2182	390.596	-0.22705	0.22119	-0.21553	-67.1758	24.9809	31.039	0.15918	-0.089844	0.019531	-60.406	211.559	460.7217	-0.15674	0.33984	-0.48584	-113.2399	-218.052	1242.629	NaN	NaN	NaN
0.062	-19.931	45.556	413.628	-0.25127	0.20733	-0.23818	-42.734	25.2536	52.576	0.17041	-0.090087	0.017578	-52.75467	224.2658	430.43	-0.12549	0.29639	-0.45557	-87.5342	-190.663	1184.215	NaN	NaN	NaN
0.064	-34.324	43.6929	403.304	-0.25342	0.2417	-0.22461	-80.07857	33.8062	29.9431	0.17383	-0.085938	0.01123	-33.095	202.78	385.169	-0.086914	0.24658	-0.42725	-76.799	-269.56	1211.368	NaN	NaN	NaN
0.066	-16.948	43.5891	407.653	-0.28125	0.22188	-0.24785	-62.453	19.08352	54.544	0.17773	-0.090332	0.0087891	-35.078	199.4281	359.1221	-0.071777	0.22412	-0.41553	-60.6726	-228.46	1172.905	NaN	NaN	NaN
0.068	-19.736	45.1161	410.945	-0.27666	0.26904	-0.22891	-36.652	55.452	34.241	0.18262	-0.087402	0.0073242	-14.459	194.464137	302.584	-0.03125	0.17432	-0.3877	-83.3407	-309.97	1177.473	NaN	NaN	NaN
0.07	-29.146	41.428	418.43	-0.29775	0.26162	-0.24375	-57.9582	50.249	6.2485	0.18262	-0.085449	-0.0019531	-26.286	223.9803	293.004	-0.00048825	0.1355	-0.3645	-29.313	-303.408	1169.277	NaN	NaN	NaN
0.072	-26.341	48.796	411.435	-0.32227	0.2415	-0.26983	-38.208	36.5476	40.9635	0.17895	-0.085205	-0.0056151	-52.581	218.290585	264.659	0.024902	0.10693	-0.33984	-18.549	-358.3646	1259.495	NaN	NaN	NaN
0.074	-2.241	51.299	420.567	-0.31641	0.2666	-0.24707	-39.645	47.1665	23.8509	0.17871	-0.093262	-0.0048828	-28.63	212.4063	245.9763	0.050293	0.066406	-0.32373	-39.561	-244.468	1296.521	NaN	NaN	NaN
0.076	-15.498	56.535	443.036	-0.34805	0.25801	-0.27988	-65.644	23.4373	20.315	0.17578	-0.089844	-0.016602	-48.329	160.062	221.2925	0.062012	0.056641	-0.31543	-107.459	-229.68	1366.549	NaN	NaN	NaN
0.078	-30.677	62.407	456.147	-0.35039	0.27754	-0.28155	-12.138	25.049	46.362	0.17773	-0.09668	-0.020996	-55.904	179.198	220.0275	0.089355	0.022461	-0.2998	-105.06	-156.95	1328.086	NaN	NaN	NaN
0.08	-37.105	52.179	471.231	-0.35742	0.30527	-0.27491	-34.333	34.7861	22.30681	0.17529	-0.10059	-0.029297	-65.53	156.16	193.147	0.10254	0.0065915	-0.2854	-137.978	-245.45	1323.276	NaN	NaN	NaN
0.082	-8.504	60.982	480.526	-0.38086	0.27246	-0.31465	-55.963	7.9775	50.334	0.17554	-0.10473	-0.036377	-24.817	196.137	206.7399	0.10596	-0.0039063	-0.27588	-65.958	-284.493	1324.529	NaN	NaN	NaN
0.084	-22.241	68.516	491.266	-0.35254	0.33594	-0.26074	-12.437	35.8691	48.681	0.17383	-0.11182	-0.043945	-79.936	142.0851	190.6925	0.11963	-0.023438	-0.25879	-95.1624	-424.821	1405.874	NaN	NaN	NaN
0.086	-15.801	72.229	483.677	-0.39297	0.30449	-0.31494	-27.666	32.9265	14.4238	0.16211	-0.11816	-0.054688	-84.275	131.5623	175.275	0.1167	-0.027832	-0.24951	-93.254	-422.684	1405.249	NaN	NaN	NaN
0.088	-18.447	71.461	496.229	-0.41797	0.27285	-0.35469	-32.785	15.8375	52.347	0.15723	-0.12256	-0.059082	-96.328	68.043	139.043	0.11279	-0.033203	-0.24219	-72.486	-494.899	1465.004	NaN	NaN	NaN
0.09	-8.82900000000001	76.371	505.899	-0.40625	0.31934	-0.32851	-5.299	38.9184	34.199	0.14502	-0.12158	-0.075684	-53.643	83.733	111.6053	0.11596	-0.037842	-0.2229	-40.967	-424.287	1461.3672	NaN	NaN	NaN
0.092	-20.815	89.068	515.272	-0.43027	0.29727	-0.35996	-38.856	16.4236	8.59	0.1355	-0.11181	-0.091309	-32.11	72.276	100.605	0.10303	-0.022949	-0.22217	-38.094	-439.869	1527.726497	NaN	NaN	NaN
0.094	-18.82	75.068	517.936	-0.42334	0.3457	-0.34521	-5.837	15.131	30.9671	0.12891	-0.10449	-0.1084	-30.462	104.308	83.482	0.10547	-0.018555	-0.21631	29.158	-348.866	1563.054	NaN	NaN	NaN
0.096	-17.17	58.641	538.904	-0.43926	0.3499	-0.36006	-2.712	38.3919	14.276	0.11719	-0.09082	-0.14014	-68.116	82.7144	63.0506	0.10645	-0.0083008	-0.21191	-10.365	-382.914	1652.478	NaN	NaN	NaN
0.098	-17.537	60.858	559.23	-0.47539	0.29668	-0.42578	-52.6867	8.681	25.3211	0.12134	-0.072998	-0.1648	-64.077	72.126	42.1722	0.11133	0.0058594	-0.20898	-86.862	-288.61	1731.7173	NaN	NaN	NaN
0.1	-12.257	74.351	556.91	-0.42773	0.39551	-0.35625	-27.015	34.423	41.0994	0.12207	-0.055176	-0.18457	-65.3115	31.1148	35.2783	0.11474	0.011475	-0.20239	-140.59	-273.6681	1827.816	NaN	NaN	NaN
0.102	-25.659	77.479	563.362	-0.48066	0.35879	-0.42597	-29.583	42.2842	13.3125	0.12158	-0.026855	-0.21826	-73.697	15.8085	55.2463	0.11816	0.022461	-0.19727	-118.82512	-148.838	1830.783	NaN	NaN	NaN
0.104	-13.81	85.172	569.053	-0.51904	0.30029	-0.50732	-43.436	14.3274	40.8894	0.12012	-0.015625	-0.23438	-38.643	27.362	69.808	0.11621	0.031738	-0.19141	-145.818	-147.191	1838.556	NaN	NaN	NaN
0.106	-7.715	91.528	589.813	-0.46162	0.41377	-0.41133	-25.03	40.0056	21.3144	0.11377	0.0097656	-0.26807	-36.102	27.72693	38.8397	0.11572	0.027832	-0.18555	-99.202	-88.478	1786.311	NaN	NaN	NaN
0.108	-17.173	84.722	598.643	-0.50616	0.36797	-0.46416	-63.388	42.724	-8.9007	0.10132	0.01831	-0.29199	-44.623	59.712	15.6887	0.12256	0.021973	-0.17871	-79.686	-166.149	1798.084	NaN	NaN	NaN
0.11	-21.994	76.084	600.345	-0.49639	0.38008	-0.47627	-60.05	27.04671	35.6083	0.084961	0.026367	-0.31787	-63.1988	19.9068	-11.585	0.12133	0.01709	-0.16895	-95.402	-113.473	1789.092	NaN	NaN	NaN
0.112	-10.78	81.333	618.426	-0.48067	0.44414	-0.42549	-31.189	53.0837	15.132	0.047363	0.033203	-0.3584	-38.936	21.6285	8.67847	0.12207	0.017578	-0.16064	-73.8373	-164.9105	1831.2899	NaN	NaN	NaN
0.114	-5.545	98.378	627.404	-0.55566	0.33887	-0.54004	-67.3027	-1.5069	17.997	0.019531	0.032227	-0.37354	-41.135	-7.357	11.7458	0.12939	0.0092773	-0.15137	-44.947	-101.799	1856.125	NaN	NaN	NaN
0.116	-9.447	98.915	627.579	-0.51641	0.41426	-0.4956	-43.692	-6.9503	84.3457	-0.048828	0.040039	-0.40381	14.968	27.5128	26.6795	0.1333	0.0019531	-0.14502	-45.9676	-178.994	1889.4501	NaN	NaN	NaN
0.118	-24.398	96.267	621.759	-0.5	0.46592	-0.44609	-47.0328	10.4392	74.301	-0.11279	0.045899	-0.43531	-10.746	13.6794	22.0849	0.15234	-0.0063477	-0.13428	-8.91	-138.592	1881.9578	NaN	NaN	NaN
0.12	0.99499999999999	96.946	628.952	-0.58906	0.35264	-0.58359	-57.8962	-21.9314	120.764	-0.19092	0.054688	-0.4834	-18.992	35.3702	40.84	0.1648	-0.013428	-0.12671	-41.747	-187.247	1885.595	NaN	NaN	NaN
0.122	-12.094	103.531	640.112	-0.57099	0.37314	-0.56533	-13.714	15.4259	184.6454	-0.31152	0.058105	-0.56836	-46.479	-3.486	19.73762	0.1748	-0.030273	-0.12256	-77.104	-87.149	1863.706	NaN	NaN	NaN
0.124	-6.751	103.726	653.075	-0.50293	0.48389	-0.44531	-47.3944	24.5044	172.574	-0.37793	0.052246	-0.60059	-52.117	36.6834	19.128	0.18896	-0.044434	-0.10791	-119.042	-87.28	1864.245	NaN	NaN	NaN
0.126	-10.894	102.105	663.934	-0.57441	0.40996	-0.54727	-8.5547	-7.3844	289.397	-0.54639	0.0625	-0.67236	-69.987	31.7159	-3.817	0.19238	-0.052246	-0.10449	-86.8334	2.928	1867.45	NaN	NaN	NaN
0.128	3.926	104.469	677.289	-0.6289	0.33408	-0.63242	31.193	44.484	440.273	-0.73584	0.1001	-0.75561	-25.655	60.485	25.1489	0.1875	-0.065918	-0.098633	-122.557	-57.488	1834.162	NaN	NaN	NaN
0.13	-13.039	103.365	687.271	-0.57461	0.38447	-0.54844	-31.57448	43.36127	569.275	-0.9458	0.12354	-0.80518	-33.507	45.8174	43.3474	0.1936	-0.076904	-0.087647	-49.604	-15.615	1771.119	NaN	NaN	NaN
0.132	-2.979	108.816	676.738	-0.53994	0.44815	-0.48223	25.7309	34.3661	764.066	-1.2598	0.23828	-0.90234	-49.029	51.415	38.403	0.19824	-0.087402	-0.081055	-11.731	-51.487	1732.09	NaN	NaN	NaN
0.134	-12.409	115.71	686.527	-0.61523	0.38086	-0.58398	69.851	44.751	851.3285	-1.4375	0.31641	-0.96094	-52.08821	46.3871	16.1222	0.21045	-0.09082	-0.069824	-18.03	41.321	1661.974	NaN	NaN	NaN
0.136	8.22200000000001	121.019	689.028	-0.6374	0.41123	-0.54502	24.6292	6.01096	976.7007	-1.8218	0.5415	-1.1499	-46.894	46.55154	29.7298	0.21387	-0.09082	-0.070313	-48.819	13.215	1654.8201	NaN	NaN	NaN
0.138	-6.122	125.936	697.33	-0.64072	0.3585	-0.56866	46.217	37.9883	1117.222	-2.06	0.75684	-1.2447	-49.257	46.763	25.998	0.229	-0.086914	-0.068848	-35.644	75.717	1597.114	NaN	NaN	NaN
0.14	-5.114	126.699	690.58	-0.61767	0.36475	-0.59717	45.061	38.009	1136.7179	-2.2495	1.0513	-1.3452	-40.64	43.60269	19.468	0.26001	-0.086426	-0.065185	-53.283	28.246	1580.9599	NaN	NaN	NaN
0.142	-2.253	120.712	710.646	-0.57119	0.41201	-0.61279	28.5018	0.00400000000000489	1164.401	-2.3979	1.5435	-1.4858	-37.607	65.8723	20.6835	0.2876	-0.083008	-0.062988	-3.004	89.353	1537.503	NaN	NaN	NaN
0.144	3.88799999999999	122.706	724.16	-0.55615	0.44287	-0.646	82.27	24.25	1168.365	-2.4292	1.7808	-1.5679	-52.262	57.377	9.927	0.3125	-0.085449	-0.065918	-7.37	62.3458	1533.115	NaN	NaN	NaN
0.146	-2.988	126.872	723.108	-0.55147	0.46748	-0.68271	48.321	-27.654	1139.404	-2.3198	2.0298	-1.7534	-37.582	71.88776	43.9805	0.32422	-0.084473	-0.067383	-17.91	151.598	1507.128	NaN	NaN	NaN
0.148	-4.39200000000001	123.308	725.298	-0.55889	0.47637	-0.70108	4.5316	-76.167	1194.132	-1.979	1.9712	-1.7846	-71.696	41.11897	50.8122	0.33105	-0.09082	-0.056152	-67.3818	137.887	1526.77	NaN	NaN	NaN
0.15	-1.652	137.208	719.297	-0.57412	0.46426	-0.70185	4.692	-52.8396	1218.3933	-1.4741	1.7642	-1.6851	-75.956	46.712	57.39	0.33301	-0.099609	-0.053222	-74.5511	195.056	1519.92332	NaN	NaN	NaN
0.152	-1.29899999999999	154.857	712.028	-0.60439	0.46279	-0.70713	-2.36799999999999	-92.225	1234.6916	-0.83105	1.3574	-1.4824	-83.1946	24.077	35.121	0.32861	-0.10742	-0.043945	-90.459	123.954	1519.787	NaN	NaN	NaN
0.154	-5.105	158.244	719.139	-0.64453	0.4668	-0.7168	25.193	-71.854	1299.125	-0.62109	1.1602	-1.4238	-44.661	54.991	57.1595	0.2959	-0.11523	-0.034668	-33.496	126.527	1489.7967	NaN	NaN	NaN
0.156	-1.232	146.327	724.723	-0.67988	0.48301	-0.72832	26.943	-54.495	1259.698	-0.44043	0.85791	-1.396	-49.093	23.0137	49.488	0.2688	-0.12061	-0.03125	-0.920000000000002	77.9239	1457.6985	NaN	NaN	NaN
0.158	6.28700000000001	134.929	728.278	-0.70703	0.49804	-0.73086	12.765	-88.4333	1258.817	-0.42212	0.71606	-1.3977	-17.484	48.73	66.7975	0.24365	-0.11816	-0.027344	-44.686	125.111	1374.95909	NaN	NaN	NaN
0.16	5.05099999999999	141.154	742.089	-0.72734	0.50899	-0.72852	-36.946	-35.326	1291.9179	-0.43408	0.62158	-1.394	-49.9637	4.398	32.9282	0.21533	-0.10303	-0.026367	-50.8476	102.542	1338.382	NaN	NaN	NaN
0.162	-2.605	138.013	742.707	-0.72774	0.51387	-0.73125	-84.0248	-31.877	1302.069	-0.45996	0.5791	-1.3867	-68.033	41.0076	12.2292	0.2041	-0.091309	-0.025391	-52.5175	149.747	1307.0673	NaN	NaN	NaN
0.164	-2.456	137.264	747.771	-0.72217	0.53271	-0.73828	-80.644	-53.907	1381.6781	-0.46094	0.58105	-1.3945	-36.361	26.076	-1.216	0.18506	-0.070313	-0.029297	-67.6193	116.055	1280.594	NaN	NaN	NaN
0.166	13.831	145.425	749.682	-0.71992	0.5459	-0.74297	-71.077	-32.301	1374.4204	-0.48145	0.62402	-1.4316	3.885	54.231	36.312	0.18189	-0.059814	-0.025878	-22.014	161.25	1209.482	NaN	NaN	NaN
0.168	-4.289	169.299	733.611	-0.71953	0.55489	-0.7582	-94.7489	-129.784	1316.6571	-0.48999	0.6565	-1.4519	-25.012	35.2271	49.31761	0.17676	-0.046875	-0.027344	17.237	162.0447	1170.785	NaN	NaN	NaN
0.17	2.98700000000001	176.669	733.001	-0.72031	0.56269	-0.77071	-76.7595	-187.243	1334.2863	-0.51172	0.66602	-1.459	-26.691	58.571	53.654	0.17432	-0.038574	-0.032715	-39.8891	243.686	1121.703	NaN	NaN	NaN
0.172	-15.654	177.307	730.664	-0.72393	0.56885	-0.77061	-107.0488	-182.916	1316.185	-0.57471	0.65869	-1.4663	-35.6853	10.893	56.633	0.16992	-0.037598	-0.031738	-47.3951	249.113	1112.559	NaN	NaN	NaN
0.174	12.369	167.906	730.302	-0.73926	0.56445	-0.76367	-117.22	-222.093	1345.258	-0.63232	0.67041	-1.4907	-55.324	23.6005	45.3304	0.16211	-0.037598	-0.035645	-53.062	275.063	1044.302	NaN	NaN	NaN
0.176	-0.504000000000005	166.279	759.049	-0.75273	0.56094	-0.76153	-41.66	-182.24	1393.038	-0.76318	0.73096	-1.5435	-38.095	0.276	50.13	0.15161	-0.049073	-0.035156	-64.2432	230.894	990.456	NaN	NaN	NaN
0.178	2.846	165.586	754.872	-0.76904	0.56474	-0.75009	-31.3937	-188.098	1357.574	-0.85791	0.79639	-1.5942	-48.63	24.0873	30.3865	0.13818	-0.054199	-0.034668	-9.596	223.913	926.9907	NaN	NaN	NaN
0.18	-9.39200000000001	165.502	770.77	-0.78662	0.56592	-0.74424	-39.315	-231.168	1400.757	-0.94141	0.875	-1.6426	-31.61	23.6711	6.0806	0.10693	-0.064453	-0.03125	32.756	206.5246	890.628816	NaN	NaN	NaN
0.182	13.484	174.608	741.581	-0.79473	0.5666	-0.73847	-29.736	-191.442	1477.582	-1.021	0.97119	-1.7163	-24.445	32.797	11.63	0.092285	-0.070313	-0.028809	-42.382	229.9716	818.285	NaN	NaN	NaN
0.184	2.36699999999999	185.093	742.365	-0.79932	0.56494	-0.73193	-50.162	-198.131	1476.34	-1.0503	1.0142	-1.7534	-30.484	19.553	19.13	0.062988	-0.072754	-0.031738	-48.6418	234.713	742.264	NaN	NaN	NaN
0.186	-13.848	195.237	723.447	-0.79668	0.56739	-0.72598	-23.032	-147.6556	1534.495	-1.082	1.084	-1.8301	-59.244	-2.762	23.4227	0.047119	-0.075195	-0.031982	-14.732	233.059	672.014	NaN	NaN	NaN
0.188	-3.205	199.4	732.604	-0.78828	0.56523	-0.72051	5.092	-49.609	1493.593	-1.0788	1.1092	-1.8855	-44.264	21.285	18.7413	0.032715	-0.077148	-0.032715	-2.657	194.506	627.7644	NaN	NaN	NaN
0.19	2.608	193.961	736.754	-0.78164	0.56641	-0.70684	10.144	-93.126	1442.485	-1.0762	1.127	-1.9473	-43.807	24.49	25.336	0.023438	-0.073242	-0.041504	10.144	190.617	589.989	NaN	NaN	NaN
0.192	-4.983	200.84	720.172	-0.77568	0.56455	-0.69444	8.05408	-73.663	1486.819	-1.0801	1.1523	-2.0176	-33.334	71.975	22.9973	0.01416	-0.070801	-0.04834	31.851	200.273	571.8915	NaN	NaN	NaN
0.194	-11.345	189.068	734.481	-0.77881	0.55127	-0.68506	-30.3329	-89.008	1477.78	-1.0938	1.166	-2.0547	-33.635	49.611	34.9021	0.022461	-0.072754	-0.058594	-34.056	229.104	544.09	NaN	NaN	NaN
0.196	0.298000000000002	177.026	746.97	-0.78135	0.54346	-0.68154	28.813	-145.884	1494.073	-1.144	1.2095	-2.1265	-67.938	67.875	26.278	0.02539	-0.073486	-0.064698	-51.6361	262.369	536.3055	NaN	NaN	NaN
0.198	10.09	177.441	760.118	-0.79248	0.53291	-0.68261	70.623	-79.4022	1503.7726	-1.1775	1.2375	-2.155	-79.5046	36.4416	15.0935	0.035645	-0.074707	-0.07666	-18.26	247.737	491.1955	NaN	NaN	NaN
0.2	-17.922	189.624	748.997	-0.80459	0.52783	-0.67597	65.601	-105.133	1458.756	-1.2007	1.2622	-2.1636	-46.071	61.5863	13.9419	0.050781	-0.078613	-0.086426	-25.2281	230.697	426.3012	NaN	NaN	NaN
0.202	-9.711	184.062	732.711	-0.82002	0.52979	-0.67021	93.015	-105.5701	1498.889	-1.2261	1.2622	-2.1694	-63.3506	28.211	19.321	0.054199	-0.084473	-0.097168	-31.33	193.628	386.158	NaN	NaN	NaN
0.204	-2.90600000000001	181.134	734.586	-0.84521	0.49268	-0.68604	75.293	-45.793	1522.229	-1.2358	1.2583	-2.1636	-51.28	70.634	13.298	0.064941	-0.091797	-0.11328	-14.427	225.33	350.974	NaN	NaN	NaN
0.206	-3.905	196.237	731.842	-0.84785	0.5082	-0.65918	60.336	-93.638	1546.654	-1.2266	1.2168	-2.1465	-58.76	35.82804	9.038	0.06372	-0.1001	-0.11963	-71.278	204.386	323.053	NaN	NaN	NaN
0.208	-18.498	188.635	730.174	-0.86601	0.51972	-0.65742	65.698	-57.0327	1598.16	-1.207	1.1811	-2.1186	-47.277	73.744	31.6229	0.066406	-0.10547	-0.13037	-38.55	209.0888	286.7171	NaN	NaN	NaN
0.21	-16.766	167.7417	736.498	-0.88829	0.53105	-0.66484	20.5237	-56.6879	1570.7	-1.1777	1.1377	-2.0918	-36.948	32.987	39.2512	0.05957	-0.11426	-0.14795	-58.915	148.7263	245.271	NaN	NaN	NaN
0.212	-12.702	152.201	741.5	-0.89912	0.55029	-0.65889	8.40365	-86.7513	1541.296	-1.1479	1.0815	-2.0581	-38.012	47.5164	42.489	0.056641	-0.11621	-0.15771	-63.7843	156.45	207.5082	NaN	NaN	NaN
0.214	-27.245	154.665	757.69	-0.90967	0.56689	-0.66162	-4.6696	-8.15799999999999	1526.0898	-1.1304	1.0552	-2.0425	-62.1487	26.086	41.345	0.041504	-0.10889	-0.18018	-56.362	124.009	204.584	NaN	NaN	NaN
0.216	-8.31	153.194	779.37	-0.92207	0.58086	-0.65566	-1.259	-20.635	1479.762	-1.0894	1.0083	-2.021	-44.21	60.309	25.574	0.023926	-0.098877	-0.19702	-28.579	175.428	208.8576	NaN	NaN	NaN
0.218	-37.368	161.524	797.66	-0.92695	0.60469	-0.65351	35.5819	-43.059	1478.0997	-1.055	0.98169	-2.0076	-23.226	60.1141	43.597	0.0048828	-0.078613	-0.21582	-70.69	158.734	204.9334	NaN	NaN	NaN
0.22	-9.208	181.7733	816.03	-0.92852	0.62266	-0.64883	29.3768	8.825	1446.7166	-1.0269	0.97217	-1.9956	-35.974	64.376	59.421	-0.018066	-0.052734	-0.24609	-72.1512	184.994	183.25	NaN	NaN	NaN
0.222	-7.917	209.774	826.65	-0.93105	0.64219	-0.64375	-14.6241	-37.764	1394.545	-0.99756	0.98486	-1.98	-34.171	37.128	57.8123	-0.030762	-0.03418	-0.25391	-85.8166	122.098	175.132	NaN	NaN	NaN
0.224	0.664999999999999	226.964	859.06	-0.92725	0.6626	-0.64111	-13.7421	14.557	1411.662	-0.98389	0.99463	-1.978	-54.43	11.1575	41.2565	-0.047363	-0.00048828	-0.2915	-67.4032	134.0106	139.744	NaN	NaN	NaN
0.226	5.013	232.555	917.91	-0.92901	0.68037	-0.63506	-14.4397	51.9006	1397.3894	-0.96826	1.0122	-1.9468	-38.086	8.008	52.806	-0.049561	0.024903	-0.32202	-93.9801	58.1785	131.951	NaN	NaN	NaN
0.228	26.775	240.049	945.69	-0.93242	0.68789	-0.63828	-9.068	20.98	1389.521	-0.95093	1.0183	-1.9275	-23.543	12.5181	47.2959	-0.057129	0.050293	-0.3501	-62.113	90.9803	117.929	NaN	NaN	NaN
0.23	22.72	241.853	988.09	-0.93867	0.69258	-0.64531	7.581	98.83	1362.234	-0.92725	1.0122	-1.895	4.644	15.308	87.38332	-0.083496	0.070313	-0.38428	-91.661	30.6005	81.1989	NaN	NaN	NaN
0.232	11.128	231.066	1030.03	-0.95235	0.68985	-0.64824	-15.463	71.478	1283.533	-0.89941	1.002	-1.8477	-44.153	-23.941	96.7216	-0.10693	0.078125	-0.40576	-33.16	72.155	37.1273	NaN	NaN	NaN
0.234	18.448	213.333	1059.96	-0.96191	0.7207	-0.63965	-39.0219	54.52	1306.895	-0.88135	0.99072	-1.8198	-37.975	-5.42	110.3405	-0.17627	0.095215	-0.42529	-57.581	1.041	9.086	NaN	NaN	NaN
0.236	13.977	192.459	1082.2	-1.0206	0.69737	-0.67881	-51.0732	135.022	1311.6277	-0.85352	0.96094	-1.7598	-19.876	-34.8117	148.539	-0.25415	0.098146	-0.44483	-43.627	19.017	11.36	NaN	NaN	NaN
0.238	10.346	194.498	1075.85	-1.0763	0.69033	-0.71025	-78.852	60.7231	1294.664	-0.83252	0.93164	-1.7202	4.491	-14.9969	205.3405	-0.34375	0.09668	-0.4668	-89.449	-30.873	10.53	NaN	NaN	NaN
0.24	1.564	156.25	1064.85	-1.1391	0.68525	-0.7294	-3.872	88.7526	1290.936	-0.81445	0.90332	-1.6738	-28.3969	-45.8772	290.631	-0.4751	0.092285	-0.51123	-13.09	49.633	14.36681	NaN	NaN	NaN
0.242	-1.777	120.331	1071.71	-1.183	0.74317	-0.70918	-14.502	88.2177	1221.572	-0.78662	0.86182	-1.6128	1.405	-0.0730000000000004	436.239	-0.55664	0.081055	-0.54395	-47.189	28.3872	1.64	NaN	NaN	NaN
0.244	-7.285	85.812	1077.53	-1.2441	0.73047	-0.75879	-16.299	26.434	1187.129	-0.77148	0.8457	-1.5781	-9.4907	3.7319	605.195	-0.7373	0.070313	-0.61719	-22.926	80.948	22.5626	NaN	NaN	NaN
0.246	-18.277	53.92	1075.02	-1.2454	0.83076	-0.73994	-12.501	103.8097	1197.0468	-0.74316	0.81299	-1.5034	-21.353	50.988	773.48	-0.90503	0.061768	-0.66088	-37.43	6.888	30.5015	NaN	NaN	NaN
0.248	-1.502	23.405	1060.03	-1.2663	0.86182	-0.78233	-13.724	110.752	1149.6149	-0.70605	0.77148	-1.4531	-28.524	-10.6414	902.093	-1.1172	0.064453	-0.71582	-0.337000000000003	62.083	22.1513	NaN	NaN	NaN
0.25	-15.527	-3.997	1047.53	-1.2605	0.94267	-0.7835	17.32	112.439	1149.245	-0.68799	0.75439	-1.4194	-10.042	12.20805	1033.3447	-1.4434	0.11475	-0.79688	-56.885	26.1838	26.1624	NaN	NaN	NaN
0.252	-19.807	-1.33	1010.9	-1.2241	0.99132	-0.77695	19.609	158.674	1108.1739	-0.65186	0.72119	-1.3589	-5.18	-4.3414	1166.9131	-1.6108	0.1665	-0.83936	16.418	89.318	13.4275	NaN	NaN	NaN
0.254	-42.904	1.928	983.06	-1.2026	1.0327	-0.78662	9.526	88.625	1052.4708	-0.61865	0.70069	-1.3188	-7.81	56.0576	1283.365	-1.9668	0.33887	-0.94238	-36.128	20.559	-0.838999999999999	NaN	NaN	NaN
0.256	-24.808	-3.438	960.72	-1.1245	1.07	-0.74053	-6.922	134.8285	1055.0072	-0.58008	0.67578	-1.2773	13.34761	25.0212	1348.24313	-2.2309	0.56055	-0.94531	-20.716	56.4868	-11.064	NaN	NaN	NaN
0.258	-29.67	-0.338000000000008	947.07	-1.0816	1.0748	-0.73477	-11.466	191.81	1009.2568	-0.52588	0.646	-1.2163	13.346	8.358	1375.447	-2.5269	0.84424	-1.0229	-39.674	-10.2297	1.362	NaN	NaN	NaN
0.26	-41.943	-3.819	924.74	-0.98673	1.0994	-0.65547	-32.991	140.2482	996.891	-0.50049	0.63037	-1.1909	5.5075	-69.366	1362.191	-2.8569	1.3657	-1.1694	-17.592	71.0098	4.145	NaN	NaN	NaN
0.262	-58.655	-24.048	884.88	-0.94375	1.0576	-0.63984	-31.111	193.048	959.841	-0.45361	0.59668	-1.1304	-25.867	-86.848	1358.23	-2.98	1.6509	-1.2925	-82.38	19.4973	32.7555	NaN	NaN	NaN
0.264	-82.194	-55.15	872.83	-0.86084	1.0679	-0.53857	-51.1069	136.6166	889.538	-0.42261	0.5664	-1.0869	-61.4299	-83.091	1359.211	-2.9834	2.0742	-1.5957	-36.958	95.599	37.213	NaN	NaN	NaN
0.266	-72.171	-68.822	853.55	-0.84424	0.98584	-0.51992	-51.817	105.541	869.737	-0.39795	0.53955	-1.0405	-77.831	-92.202	1366.143	-2.5605	2.1445	-1.712	-85.8617	41.525	43.01425	NaN	NaN	NaN
0.268	-87.569	-81.733	846.47	-0.81358	0.98369	-0.43691	-16.767	198.041	836.155	-0.37061	0.50439	-0.97803	-57.95	-81.432	1368.933	-1.8706	2.0161	-1.7046	-47.1603	96.73	49.3933	NaN	NaN	NaN
0.27	-93.928	-91.532	831.142	-0.82256	0.88485	-0.40292	-50.111	140.623	817.785	-0.35791	0.48584	-0.94092	-50.67	-107.071	1348.457	-0.91016	1.584	-1.5879	-63.13	25.8766	68.34807	NaN	NaN	NaN
0.272	-107.235	-110.955	828.994	-0.83096	0.87255	-0.34658	-47.717	166.925	792.5434	-0.34277	0.46094	-0.89258	-34.693	-123.66	1355.6022	-0.54297	1.3145	-1.5244	-28.642	80.6431	77.964	NaN	NaN	NaN
0.274	-107.384	-125.794	852.05	-0.86523	0.79492	-0.30664	-57.861	180.0828	735.837	-0.32886	0.43726	-0.83374	-43.167	-127.5278	1367.623	-0.11865	0.80322	-1.3667	-103.2303	12.115	58.815	NaN	NaN	NaN
0.276	-108.5204	-139.838	872.851	-0.88789	0.77774	-0.27754	-86.4724	119.161	711.3025	-0.32129	0.41455	-0.78174	-86.824	-62.477	1436.8718	-0.03418	0.53418	-1.3056	-22.937	86.6836	23.9362	NaN	NaN	NaN
0.278	-106.301	-163.6225	892.527	-0.92889	0.7498	-0.26846	-49.1193	191.8399	697.484	-0.30469	0.38574	-0.7207	-141.9781	-19.84	1469.5116	-0.034668	0.37549	-1.3301	-87.6873	20.4744	28.9483	NaN	NaN	NaN
0.28	-108.422	-175.558	894.712	-0.9418	0.75254	-0.25753	-72.65457	171.922	666.2015	-0.30225	0.37451	-0.69287	-128.15	9.8	1496.383	-0.11475	0.34863	-1.3569	-40.927	74.7158	23.1164	NaN	NaN	NaN
0.282	-113.392	-196.703	907.487	-0.98995	0.77022	-0.279	-89.9257	162.72	666.781	-0.2915	0.34717	-0.63037	-83.607	-35.629	1462.811	-0.17529	0.39014	-1.3765	-62.551	-2.3513	54.4799	NaN	NaN	NaN
0.284	-107.679	-198.282	914.79	-1	0.80664	-0.2666	-70.33	232.928	595.357	-0.28711	0.32324	-0.58056	-67.301	-140.551	1480.171	-0.27734	0.50195	-1.4258	-44.39	53.4094	34.4733	NaN	NaN	NaN
0.286	-115.226	-205.1005	939.635	-1.0573	0.83565	-0.32777	-85.0836	163.8611	538.584	-0.27588	0.29834	-0.52686	-89.1263	-244.587	1485.629	-0.34033	0.59717	-1.4576	-99.437	-4.5754	48.7225	NaN	NaN	NaN
0.288	-123.899	-209.6373	973.446	-1.0692	0.90591	-0.31061	-60.871	175.9419	548.537	-0.25928	0.27832	-0.4668	-127.78287	-257.786	1545.281	-0.39795	0.66748	-1.4897	-36.264	55.743	43.89016	NaN	NaN	NaN
0.29	-119.438	-212.476	1003.127	-1.1235	0.93281	-0.37897	-42.937	175.552	528.646	-0.25146	0.26904	-0.43799	-111.856	-232.643	1492.929	-0.49414	0.70557	-1.5293	-84.6652	-9.9555	51.9204	NaN	NaN	NaN
0.292	-125.72	-210.6482	1007.91	-1.1486	1.0187	-0.3738	-42.451	115.2145	526.519	-0.22559	0.25342	-0.38232	-31.801	-216.244	1490.612	-0.55566	0.70605	-1.5469	-41.164	46.7562	38.6112	NaN	NaN	NaN
0.294	-141.563	-213.581	1016.262	-1.2026	1.0337	-0.4458	-24.053	174.485	487.824	-0.20801	0.24317	-0.34937	-19.563	-252.967	1478.68	-0.70166	0.7251	-1.5991	-28.543	-1.2275	30.0949	NaN	NaN	NaN
0.296	-135.903	-200.992	1011.4417	-1.2399	1.1407	-0.43942	-44.3002	156.984	421.007	-0.18311	0.22705	-0.31299	-42.221	-279.919	1536.446	-0.8667	0.78564	-1.6675	-13.778	56.987	33.3638	NaN	NaN	NaN
0.298	-129.661	-175.37	1000.354	-1.2737	1.1652	-0.48347	-32.197	140.62598	432.4794	-0.1499	0.19727	-0.25977	-27.609	-266.689	1574.797	-0.94873	0.83838	-1.7065	-61.77965	2.32191	32.387	NaN	NaN	NaN
0.3	-133.404	-139.883028	1009.001	-1.3074	1.2659	-0.50324	-24.449	189.472	398.8709	-0.13574	0.18945	-0.23438	-22.061	-199.0913	1644.842	-1.1172	0.95703	-1.8125	5.70800000000001	51.7012	8.7078	NaN	NaN	NaN
0.302	-125.923	-136.9251	1026.3226	-1.3146	1.3085	-0.53631	-45.371	136.5139	370.7638	-0.11816	0.15918	-0.19629	-33.436	-116.7405	1680.43	-1.21	1.0498	-1.9004	-56.873	3.66	16.4236	NaN	NaN	NaN
0.304	-109.199	-138.452	1067.2735	-1.3242	1.3926	-0.57275	12.81	174.59	389.2784	-0.095945	0.12549	-0.15137	-18.5006	-79.213	1659.866	-1.2676	1.1289	-1.9824	-11.158	51.3397	2.108	NaN	NaN	NaN
0.306	-122.523	-143.553	1090.363	-1.2886	1.4264	-0.57915	11.294	176.165	354.292	-0.076172	0.10449	-0.11719	16.6661	-46.695	1587.419	-1.2847	1.1948	-2.0562	-15.762	5.4463	12.263	NaN	NaN	NaN
0.308	-133.655	-141.82974	1100.386	-1.2719	1.4589	-0.61865	-23.913	109.6153	372.268	-0.060547	0.081543	-0.088867	1.729	-41.385	1535.537	-1.2793	1.209	-2.0957	1.891	59.0527	16.404	NaN	NaN	NaN
0.31	-137.3	-141.7715	1100.193	-1.2026	1.4908	-0.59444	6.531	158.69	353.264	-0.055664	0.083008	-0.079102	45.641	-32.704	1571.378	-1.2515	1.2271	-2.1519	-74.4263	22.9164	3.8249	NaN	NaN	NaN
0.312	-142.461	-124.89179	1095.7659	-1.1743	1.4719	-0.63887	-22.555	125.906	308.805	-0.02832	0.066406	-0.048828	33.2486	-51.839	1585.713	-1.2431	1.25	-2.2002	-37.087	65.818	13.2999	NaN	NaN	NaN
0.314	-141.46	-118.025	1085.4984	-1.0938	1.4766	-0.58887	-18.17	106.2346	300.137	-0.013916	0.063477	-0.031739	10.3193	-46.0566	1609.275	-1.252	1.3086	-2.25	-67.994	27.242	42.513	NaN	NaN	NaN
0.316	-150.173	-113.835	1070.505	-1.0684	1.3964	-0.63455	14.145	145.719	269.7112	0.016602	0.047852	0	23.9719	-62.906	1569.3057	-1.2842	1.4258	-2.3008	-48.031	58.0052	29.15254	NaN	NaN	NaN
0.318	-130.762	-131.4822	1068.3959	-1.0013	1.3752	-0.57053	-52.5256	87.151	242.6227	0.041992	0.044434	0.015625	62.921	-53.864	1586.937	-1.3047	1.4941	-2.3125	-30.34	33.275	29.2123	NaN	NaN	NaN
0.32	-138.703	-138.2575	1084.0033	-0.99808	1.2733	-0.60468	-23.106	112.396	231.857	0.049805	0.041504	0.026855	69.0302	-73.736	1572.85	-1.3374	1.5825	-2.3101	-35.218	64.4868	14.014	NaN	NaN	NaN
0.322	-138.224	-145.535	1074.3582	-0.95847	1.2564	-0.54636	-6.642	125.1812	221.557	0.058594	0.035156	0.037598	59.296	-55.442	1620.807	-1.3552	1.5842	-2.2966	-88.357	48.5415	25.7934	NaN	NaN	NaN
0.324	-148.119	-144.598	1055.3422	-0.97363	1.1572	-0.58203	-68.3787	70.403	220.524	0.080323	0.025391	0.056641	30.697	-35.075	1589.448	-1.3413	1.52	-2.2808	-32.676	64.8222	17.84	NaN	NaN	NaN
0.326	-144.695	-119.496	1027.2301	-0.96957	1.1721	-0.52985	-50.275	108.6769	213.475	0.091309	0.026367	0.074219	15.4271	8.4491	1620.235	-1.2852	1.3535	-2.2207	-58.421	34.059	50.538	NaN	NaN	NaN
0.328	-136.571	-96.1005	1015.5271	-0.95877	1.145	-0.50533	-53.598	89.5866	165.5219	0.093262	0.026367	0.091309	24.409	0.9068	1589.437	-1.2515	1.2544	-2.187	-59.558	47.5665	22.9134	NaN	NaN	NaN
0.33	-131.556	-69.186	999.4358	-0.97438	1.1365	-0.51688	-78.2935	83.841	173.208	0.097168	0.026855	0.095703	23.721	9.489	1596.465	-1.1895	1.0898	-2.124	-54.833	41.327	51.3447	NaN	NaN	NaN
0.332	-132.322	-60.092	989.2437	-0.93364	1.1676	-0.46158	-42.805	129.881	177.4229	0.098633	0.029297	0.10986	34.6157	-0.176	1535.517	-1.1612	1.025	-2.0923	-51.829	69.254	53.3467	NaN	NaN	NaN
0.334	-148.745	-66.172	976.084	-0.93555	1.1113	-0.50537	-79.0427	84.808	164.81424	0.11304	0.03125	0.12818	49.2702	45.806	1474.7118	-1.1362	0.99268	-2.0718	-95.328	64.225	47.535	NaN	NaN	NaN
0.336	-123.234	-70.101	973.257	-0.90114	1.1633	-0.4519	-55.2069	103.21	143.19665	0.11133	0.03125	0.13965	24.6141	80.2208	1392.8364	-1.0835	0.99951	-2.0581	-51.467	53.44	36.3337	NaN	NaN	NaN
0.338	-141.404	-68.7252	946.2224	-0.87863	1.116	-0.45866	-57.9808	112.50429	75.31	0.10889	0.030273	0.14404	-27.0612	95.5533	1369.509	-1.0503	1.0083	-2.0522	-71.53	38.683	53.6279	NaN	NaN	NaN
0.34	-140.934	-68.1792	920.4147	-0.85602	1.1373	-0.43429	-79.84053	63.056	66.965	0.10645	0.02832	0.14697	-45.1956	92.677	1364.8626	-0.97656	1.0215	-2.0234	-79.272	18.9457	34.1	NaN	NaN	NaN
0.342	-125.828	-67.8129	910.6316	-0.82415	1.098	-0.4204	-40.882	91.2073	90.4358	0.12061	0.024902	0.15625	-27.697	95.8361	1348.363	-0.9397	1.0212	-1.9988	-25.96	32.905	48.8103	NaN	NaN	NaN
0.344	-118.34	-47.376	870.6148	-0.8042	1.0942	-0.41455	-70.191	68.2597	71.6246	0.12451	0.02124	0.16675	-25.987	118.657	1312.121	-0.90771	1.0044	-1.9663	-31.099	29.29901	29.949	NaN	NaN	NaN
0.346	-127.377	-41.331	880.2727	-0.79055	1.0412	-0.40474	-68.5599	50.638	83.2207	0.12207	0.025879	0.17383	0.402000000000001	144.947	1277.139	-0.87354	0.97314	-1.9097	-67.3818	51.8239	32.0213	NaN	NaN	NaN
0.348	-115.196	-43.3832	871.401	-0.75524	1.0341	-0.37142	-29.477	83.176	67.7053	0.12793	0.023438	0.17871	-28.957	171.5732	1276.374	-0.84961	0.96094	-1.873	-32.473	19.1553	34.97498	NaN	NaN	NaN
0.35	-103.707	-64.345	858.3129	-0.77143	0.92835	-0.41452	-56.5394	54.4666	57.659	0.13428	0.021973	0.1875	-107.2615	164.823	1258.949	-0.81201	0.94189	-1.8081	-21.915	38.42895	53.313	NaN	NaN	NaN
0.352	-105.014	-41.487	819.9688	-0.69961	0.98129	-0.31712	-25.552	76.4242	91.7259	0.1543	0.021973	0.19727	-86.902	176.325	1247.597	-0.78125	0.94335	-1.7632	-39.659	9.9045	26.7028	NaN	NaN	NaN
0.354	-110.695	-27.8258	791.484	-0.72607	0.84619	-0.3877	-18.726	98.187	47.459	0.16626	0.025879	0.19483	-71.727	160.045	1214.603	-0.75781	0.93213	-1.7202	7.451	40.237	47.279	NaN	NaN	NaN
0.356	-102.643	-22.746	773.415	-0.63445	0.92176	-0.28322	-54.265	64.87816	29.431	0.19092	0.023438	0.2002	-1.27	163.566	1201.062	-0.72656	0.91504	-1.6484	-33.647	10.4691	29.553	NaN	NaN	NaN
0.358	-88.367	-11.8452	759.9141	-0.64063	0.84132	-0.31813	11.685	84.394	51.056	0.21436	0.026855	0.20313	-37.793	108.111	1149.0789	-0.71973	0.90039	-1.6152	-52.541	29.7211	37.0361	NaN	NaN	NaN
0.36	-105.983	-6.394	753.061	-0.57767	0.86271	-0.27456	-21.788	47.2836	28.515	0.22412	0.022949	0.2002	-48.162	157.3566	1100.1943	-0.7002	0.87354	-1.5327	-36.575	3.7723	23.7808	NaN	NaN	NaN
0.362	-113.444	-1.257	738.86	-0.55215	0.83701	-0.29015	-34.791	23.668	48.1328	0.24268	0.010254	0.20068	-84.9032	142.34	1036.327	-0.6897	0.84815	-1.4644	-22.008	25.0596	14.58782	NaN	NaN	NaN
0.364	-103.609	-12.628	727.085	-0.51953	0.80859	-0.30713	28.777	53.126	36.23055	0.24463	-0.003418	0.19654	-33.68	189.764	1008.40754	-0.67432	0.82275	-1.4038	-62.5199	2.79586	-3.782	NaN	NaN	NaN
0.366	-107.7562	1.321	690.0782	-0.47551	0.79915	-0.29433	-45.431	32.3906	12.5648	0.24219	-0.013672	0.19531	-38.184	130.357	972.2511	-0.64014	0.77979	-1.3198	-2.786	49.8376	14.6389	NaN	NaN	NaN
0.368	-107.006	11.0555	652.1673	-0.45335	0.7642	-0.30575	-20.689	49.8822	40.120232	0.24365	-0.029785	0.18994	-34.363	168.491	941.703	-0.61963	0.75	-1.2793	-35.515	35.825	20.0613	NaN	NaN	NaN
0.37	-106.603	7.0824	614.742	-0.42873	0.7419	-0.29602	-12.1	69.927	16.733	0.24756	-0.036133	0.19092	-47.43	159.3192	905.446	-0.56738	0.69141	-1.1992	-37.913	73.5017	-0.76925	NaN	NaN	NaN
0.372	-96.664	1.7253	604.739	-0.40313	0.7132	-0.2876	-44.429	41.403	19.9319	0.23047	-0.030273	0.17041	-36.635	254.996	863.9778	-0.52441	0.65088	-1.1343	-41.274	38.4612	28.1094	NaN	NaN	NaN
0.374	-95.918	8.0808	590.6878	-0.38477	0.68359	-0.27783	-6.27	72.925	22.2978	0.21655	-0.029785	0.16162	-69.928	238.042	845.888	-0.48779	0.61426	-1.0703	-51.837	56.025	34.5286	NaN	NaN	NaN
0.376	-106.903	5.2967	571.3865	-0.36963	0.66415	-0.27275	-47.797	44.806	18.876	0.21094	-0.02832	0.15381	-80.581	277.026	808.005	-0.4375	0.56445	-0.9873	-62.82	17.531	38.5697	NaN	NaN	NaN
0.378	-88.751	-12.82746	571.3541	-0.35752	0.63739	-0.27353	-61.1329	19.2394	53.269	0.20508	-0.011719	0.15039	-76.383	208.9026	734.9	-0.41406	0.53711	-0.94922	-35.923	49.8532	44.572	NaN	NaN	NaN
0.38	-96.426	-6.3636	546.422	-0.34267	0.60967	-0.26455	-14.872	43.498	37.7283	0.20459	-0.0029297	0.14795	-74.822	229.583	669.803	-0.37402	0.50098	-0.86621	-55.4622	8.8707	79.139	NaN	NaN	NaN
0.382	-82.484	11.1893	532.2751	-0.32256	0.58193	-0.2584	-72.6324	35.7402	17.0336	0.20361	0.01416	0.14502	-57.238	210.0289	658.221	-0.35205	0.47192	-0.8081	-87.8539	28.861	86.16	NaN	NaN	NaN
0.384	-104.849	26.939	504.7015	-0.30518	0.55176	-0.25195	-61.077	48.7926	37.855	0.20386	0.030761	0.14184	-49.085	243.186	624.547	-0.33203	0.44434	-0.74902	-65.599	-6.401	124.6124	NaN	NaN	NaN
0.386	-108.459	22.2295	476.31	-0.28574	0.52637	-0.24141	-37.339	64.216	32.0364	0.20215	0.040527	0.14355	-44.886	197.2926	600.8758	-0.3125	0.40625	-0.66992	-38.066	12.778	158.1671	NaN	NaN	NaN
0.388	-96.29	20.68992	467.7069	-0.26748	0.49932	-0.22793	-74.7674	27.0797	36.1452	0.20313	0.054199	0.14795	-82.868	192.5977	530.276	-0.29883	0.38965	-0.63086	-49.518	-8.814	221.971	NaN	NaN	NaN
0.39	-93.061	22.1395	443.1154	-0.24678	0.47002	-0.22402	-41.359	37.40761	32.2665	0.20361	0.061035	0.14502	-65.832	182.768	486.5637	-0.28809	0.34863	-0.55469	-17.0893	25.583	348.253	NaN	NaN	NaN
0.392	-106.0159	24.51861	440.139	-0.23096	0.44424	-0.21816	-83.5035	42.3789	-0.989999999999998	0.20264	0.064941	0.15039	-55.771	175.496	467.829	-0.27369	0.32153	-0.49878	-19.4388	11.8178	576.069	NaN	NaN	NaN
0.394	-83.432	25.57328	418.155162	-0.21436	0.4126	-0.21924	-69.3591	26.844	31.5565	0.20361	0.066894	0.15332	-52.759	187.736	480.6446	-0.26904	0.29736	-0.45264	-7.228	57.835	751.76	NaN	NaN	NaN
0.396	-81.515	26.5096	403.3371	-0.1959	0.3916	-0.21231	-31.749	43.275	43.13	0.20117	0.06543	0.15674	-96.64	200.3772	448.9877	-0.23975	0.25342	-0.38428	-6.123	34.271	972.561	NaN	NaN	NaN
0.398	-74.738	48.4244	373.8018	-0.1789	0.36523	-0.20459	-81.6203	29.1767	40.1577	0.20654	0.062012	0.16211	-71.3076	226.644	416.7632	-0.22803	0.24561	-0.35791	19.542	36.3987	1104.69	NaN	NaN	NaN
0.4	-85.703	37.7519	375.5129	-0.16328	0.34375	-0.19834	-47.987	27.33863	50.167	0.20898	0.060059	0.15674	-66.6438	197.334	373.11	-0.20068	0.21875	-0.30176	2.248	23.3889	1277.034	NaN	NaN	NaN
0.402	-70.726	46.2189	362.2743	-0.14883	0.31992	-0.19541	-27.216	44.401	35.0627	0.20605	0.064941	0.15967	-72.2518	204.238	351.5733	-0.17944	0.20141	-0.2561	43.198	42.1211	1391.941	NaN	NaN	NaN
0.404	-71.131	44.4548	356.44419	-0.13916	0.29883	-0.19629	-62.2916	20.909	40.399	0.20264	0.064941	0.15332	-105.5051	153.3921	343.6399	-0.15625	0.18652	-0.21875	39.11	12.324	1522.786	NaN	NaN	NaN
0.406	-76.938	51.29	342.6015	-0.12939	0.28545	-0.18848	-10.942	48.4308	41.9852	0.20215	0.065918	0.14795	-70.249	191.275	331.09108	-0.12305	0.17041	-0.16943	33.6115	-22.159	1536.144	NaN	NaN	NaN
0.408	-87.944	32.5491	343.3945	-0.11768	0.26729	-0.18477	-30.636	47.6899	3.762	0.19922	0.066406	0.13672	-59.877	155.5909	317.5987	-0.10303	0.15527	-0.14697	64.25	-108.219	1581.245	NaN	NaN	NaN
0.41	-86.689	28.0695	339.73941	-0.099316	0.26377	-0.17187	-27.532	21.324	13.2728	0.20117	0.074463	0.12354	-25.175	189.167	296.382	-0.066406	0.12695	-0.097168	34.836	-146.546	1556.154	NaN	NaN	NaN
0.412	-79.712	36.6819	314.1421	-0.083691	0.2624	-0.16523	16.925	28.2975	23.292	0.2085	0.088379	0.10742	-41.8417	102.935	264.156	-0.050781	0.10449	-0.07373	-30.531	-165.807	1565.483	NaN	NaN	NaN
0.414	-89.572	32.6532	308.4469	-0.081543	0.24219	-0.17432	-44.456	-0.419	22.8589	0.21484	0.10449	0.078125	-48.532	132.39338	212.827	-0.030762	0.072754	-0.034668	-24.478	-147.855	1568.6275	NaN	NaN	NaN
0.416	-82.789	20.837	307.7925	-0.068848	0.23662	-0.17451	-7.414	3.756	55.765	0.21631	0.10986	0.063477	-65.615	102.371	200.5662	-0.013184	0.057129	-0.0019531	-16.049	-159.186	1544.55261	NaN	NaN	NaN
0.418	-80.721	22.27	316.6261	-0.065137	0.23486	-0.16787	-2.479	35.919	27.1126	0.22412	0.12988	0.030762	-21.734	179.255	175.9807	-0.0029297	0.042969	0.011719	-1.779	-178.944	1486.2242	NaN	NaN	NaN
0.42	-73.311	40.0186	297.26	-0.078027	0.21377	-0.18194	-51.847	23.1627	26.1035	0.23047	0.14917	0.0063479	-22.88	132.629	185.7417	0.0078125	0.023438	0.04541	-11.386	-214.198	1458.06	NaN	NaN	NaN
0.422	-77.775	48.6388	278.9378	-0.090332	0.19619	-0.18311	-0.0189999999999984	38.921	44.552	0.24023	0.17383	-0.023926	-26.602	141.978	176.9789	0.020508	0.023438	0.074707	-12.225	-169.372	1481.986	NaN	NaN	NaN
0.424	-64.585	45.6285	285.5637	-0.11182	0.18066	-0.19189	-31.541	42.725	2.617	0.25049	0.20898	-0.051758	-58.97341	72.298	187.49	0.027832	0.015137	0.095703	-91.118	-78.827	1542.515	NaN	NaN	NaN
0.426	-74.497	44.583659	280.271	-0.12822	0.17041	-0.18271	-35.578	28.235	9.699	0.25635	0.23047	-0.072266	-43.247	107.9709	159.182	0.029297	0.012695	0.11621	-109.769	-8.88	1589.6263	NaN	NaN	NaN
0.428	-90.517	40.2128	270.132	-0.13252	0.19014	-0.16484	0.100000000000001	41.2506	8.661	0.27344	0.26611	-0.11475	-17.905	82.766	165.752	0.035156	0.013672	0.12109	-143.198	-6.05	1557.8445	NaN	NaN	NaN
0.43	-84.965	37.3505	272.5829	-0.15869	0.16279	-0.17969	-55.13	18.025	9.141	0.29248	0.29639	-0.1438	-38.653	96.923	118.5711	0.054688	0.012207	0.14307	-112.0292	-66.832	1493.688	NaN	NaN	NaN
0.432	-86.877	34.7053	276.1062	-0.16241	0.16181	-0.16611	-47.452	14.374	41.8772	0.30273	0.31885	-0.16895	-20.976	84.8589	84.631	0.061279	0.015625	0.15527	-92.5152	-130.699	1508.918	NaN	NaN	NaN
0.434	-92.048	47.9981	274.5879	-0.14941	0.19922	-0.13477	-18.474	41.562	14.311	0.32471	0.33691	-0.18359	-45.88	82.431	38.984	0.063965	0.022461	0.15869	-77.8	-176.9024	1558.822	NaN	NaN	NaN
0.436	-93.404	62.641	261.3382	-0.17392	0.16182	-0.17168	-81.9424	35.16164	12.9204	0.32959	0.36475	-0.21387	-12.212	63.1251	26.252	0.079102	0.027344	0.17383	-129.568	-185.285	1589.5282	NaN	NaN	NaN
0.438	-103.589	71.52	256.9136	-0.16797	0.16328	-0.15859	-45.711	44.4535	24.4803	0.3252	0.42383	-0.30127	-46.21	33.593	24.917	0.097412	0.033447	0.18848	-112.23	-228.191	1592.62	NaN	NaN	NaN
0.44	-71.11	62.446	243.144	-0.15742	0.1789	-0.14414	-58.522	51.754	13.317	0.3081	0.46142	-0.3545	-60.445	26.704	39.0968	0.098633	0.032227	0.19385	-85.5943	-216.696	1533.0301	NaN	NaN	NaN
0.442	-78.896	61.6822	248.9575	-0.17461	0.14893	-0.17588	-78.4098	34.3804	31.086	0.28711	0.49268	-0.39404	-70.211	21.325	34.51	0.10986	0.041504	0.20996	-68.1403	-263.585	1532.969	NaN	NaN	NaN
0.444	-66.418	57.6771	255.1501	-0.16748	0.14551	-0.17139	-41.504	31.618	44.414	0.23828	0.52197	-0.43164	-44.32	74.9675	17.36	0.10791	0.043945	0.21826	-34.896	-230.73	1534.681	NaN	NaN	NaN
0.446	-84.235	41.787	249.5271	-0.1581	0.15576	-0.15869	-92.289	-4.53754	45.999	0.21094	0.51807	-0.43896	-57.16	53.9016	13.484	0.11572	0.038086	0.22705	-8.111	-254.041	1629.8	NaN	NaN	NaN
0.448	-55.202	48.1201	259.0191	-0.17431	0.13594	-0.18066	-53.243	-15.3533	98.0252	0.14111	0.55566	-0.4873	-60.204	82.978	20.4496	0.10938	0.040527	0.23047	-36.1393	-163.894	1679.393	NaN	NaN	NaN
0.45	-62.825	54.3553	252.382	-0.17236	0.13203	-0.18183	-53.925	2.9879	116.9491	0.080567	0.57886	-0.54126	-68.253	28.1081	36.079	0.11377	0.041992	0.2417	-25.2616	-132.7693	1717.227	NaN	NaN	NaN
0.452	-74.398	61.266	254.59469	-0.16367	0.15537	-0.1626	-84.879	4.12061	155.4128	0.0053711	0.60352	-0.59961	-74.686	67.334	4.9767	0.125	0.038086	0.25	29.1344	-27.663	1681.813	NaN	NaN	NaN
0.454	-81.598	50.944	276.6187	-0.16943	0.14551	-0.17676	-44.904	20.1252	214.2873	-0.11719	0.61914	-0.69727	-64.2399	37.465	2.389	0.12988	0.039551	0.25342	45.859	-39.162	1642.832	NaN	NaN	NaN
0.456	-70.696	51.5611	272.5603	-0.1626	0.13555	-0.1749	-95.0688	23.7654	275.482	-0.18604	0.64063	-0.74805	-20.591	68.1521	6.094	0.13574	0.044434	0.26611	21.659	27.202	1593.238	NaN	NaN	NaN
0.458	-66.112	57.3009	260.4363	-0.14961	0.15557	-0.15469	-91.98	34.1477	412.381	-0.37793	0.67627	-0.87549	-57.378	-0.485999999999997	31.08	0.16137	0.048095	0.27222	68.9425	-4.43000000000001	1631.797	NaN	NaN	NaN
0.46	-81.652	49.7434	276.5779	-0.1543	0.15049	-0.16836	-35.283	62.93	539.575	-0.55444	0.70679	-0.95337	-67.052	42.3727	30.367	0.18652	0.057617	0.27637	65.082	62.9701	1619.152	NaN	NaN	NaN
0.462	-70.872	37.5608	273.8474	-0.15527	0.13018	-0.17861	-82.723	67.3338	668.114	-0.74561	0.76611	-1.0132	-43.921	22.032	20.3512	0.24219	0.058594	0.28662	94.494	1.474	1646.3469	NaN	NaN	NaN
0.464	-67.47	45.7054	264.263	-0.13818	0.14697	-0.15723	-58.774	57.16717	821.479	-1.0776	0.87256	-1.1401	-39.915	84.587	17.0494	0.26758	0.057617	0.28613	130.136	14.536	1613.4123	NaN	NaN	NaN
0.466	-46.036	56.0188	252.8492	-0.1415	0.1417	-0.16983	-45.368	63.294	952.437	-1.2554	0.94189	-1.1938	-52.5013	38.8395	30.8818	0.30957	0.047852	0.28174	93.22	-56.835	1590.8817	NaN	NaN	NaN
0.468	-62.811	54.4773	264.5573	-0.15459	0.12002	-0.19737	-75.601	60.94	1067.3514	-1.562	1.1665	-1.2573	-54.96	63.001	46.113	0.35205	0.031006	0.28271	137.35	-17.4338	1585.7754	NaN	NaN	NaN
0.47	-57.979	47.462	290.1539	-0.14952	0.12627	-0.18681	-25.464	71.733	1175.493	-1.7115	1.397	-1.3003	-30.908	52.096	63.061	0.37305	0.010742	0.28516	114.38	-24.9256	1571.3181	NaN	NaN	NaN
0.472	-61.66	53.9476	315.6802	-0.15078	0.12549	-0.1792	-86.886	78.503	1225.498	-1.7837	1.6372	-1.3511	-36.354	75.237	50.2957	0.39307	-0.024414	0.26904	103.362	3.309	1590.059	NaN	NaN	NaN
0.474	-66.789	60.299	303.20039	-0.17188	0.10107	-0.20605	-133.4382	47.021	1277.144	-1.709	1.8555	-1.4063	-12.135	47.82844	61.0705	0.39844	-0.048828	0.26367	52.955	-36.979	1568.963	NaN	NaN	NaN
0.476	-67.917	54.6901	313.3507	-0.16241	0.12763	-0.18857	-80.776	33.5858	1297.202	-1.5854	1.9106	-1.4194	-45.302	30.3051	68.365	0.3999	-0.078613	0.26563	81.856	-37.445	1566.754	NaN	NaN	NaN
0.478	-68.995	46.96964	313.7383	-0.17373	0.129	-0.19375	-112.1029	1.9844	1247.2846	-1.21	1.8906	-1.3672	-40.257	25.45	54.3971	0.39478	-0.10132	0.2561	33.2457	-25.96	1521.436	NaN	NaN	NaN
0.48	-60.581	51.2998	304.0616	-0.18896	0.1208	-0.20898	-98.017	-64.47	1250.857	-0.9021	1.7718	-1.2884	-32.795	35.0795	33.5734	0.37988	-0.11523	0.24463	68.477	-9.0657	1532.718	NaN	NaN	NaN
0.482	-79.578	58.627	305.0484	-0.18789	0.15537	-0.19082	-78.022	-68.189	1247.498	-0.65234	1.6055	-1.207	-9.571	55.598	29.5602	0.36328	-0.12207	0.22314	43.2334	47.78983	1435.359	NaN	NaN	NaN
0.484	-84.723	62.885	303.4783	-0.20361	0.1416	-0.21777	-94.06157	-97.597	1245.005	-0.49463	1.356	-1.1245	-34.133	18.8814	32.4987	0.35449	-0.11865	0.21094	4.118	76.2362	1355.8735	NaN	NaN	NaN
0.486	-55.745	52.4041	332.4435	-0.21582	0.1543	-0.21885	-54.997	-100.205	1263.3508	-0.48975	1.2485	-1.1089	-29.32	38.746	47.1655	0.35156	-0.1084	0.19678	-39.1584	119.694	1274.114	NaN	NaN	NaN
0.488	-71.21	61.8724	339.4264	-0.21416	0.17754	-0.21338	-81.9589	-99.027	1270.306	-0.59521	1.0845	-1.0923	-59.467	-9.604692	29.2412	0.34546	-0.0979	0.18164	-5.723	104.5053	1292.5839	NaN	NaN	NaN
0.49	-70.71	59.2756026	354.9073	-0.23916	0.15488	-0.23682	-94.028	-159.337	1281.4198	-0.73023	1.0173	-1.0965	-48.144	39.63852	16.9726	0.34619	-0.085938	0.16553	-30.6948	139.2009	1270.674	NaN	NaN	NaN
0.492	-83.057	63.01529	356.5922	-0.23194	0.19736	-0.21709	-51.13	-166.002	1285.4844	-0.87402	0.98828	-1.1172	-30.942	4.774	43.5414	0.3374	-0.063965	0.14014	-31.8085	144.535	1244.373	NaN	NaN	NaN
0.494	-47.06	64.259	351.5164	-0.24756	0.1792	-0.24854	-120.44334	-181.551	1271.885	-1.0352	1.0117	-1.1748	-40.332	34.8084	53.5996	0.33154	-0.056641	0.12549	-14.75	205.3946	1153.141	NaN	NaN	NaN
0.496	-80.294	66.1885	354.3566	-0.25205	0.19824	-0.24014	-118.815	-183.872	1323.588	-1.0918	1.0527	-1.2207	-74.8848	-12.229	41.76181	0.31787	-0.023926	0.10645	-55.92	203.591	1144.673	NaN	NaN	NaN
0.498	-67.198	67.391	361.6447	-0.25136	0.22012	-0.23828	-98.0947	-145.038	1344.115	-1.1694	1.1509	-1.3276	-28.876	48.075	14.08898	0.30127	0.00048825	0.098146	-75.275	250.752	1107.836	NaN	NaN	NaN
0.5	-78.791	43.213	375.6001	-0.27364	0.20684	-0.25586	-140.644	-202.851	1342.869	-1.2016	1.226	-1.3921	-47.837	15.4957	17.5655	0.28369	0.022461	0.089844	-54.178	230.636	1108.6347	NaN	NaN	NaN
0.502	-68.709	43.1737	379.6573	-0.26729	0.24453	-0.23926	-70.423	-243.53	1356.5563	-1.2334	1.2852	-1.4473	-61.491	60.623	14.27406	0.26074	0.055176	0.077148	-60.927	230.18	1093.492	NaN	NaN	NaN
0.504	-82.121	52.4563	394.1211	-0.29443	0.21094	-0.27197	-44.112	-275.606	1347.113	-1.2788	1.3384	-1.5093	-60.043	-3.049	30.2316	0.24512	0.064453	0.066406	-37.28962	192.7495	1060.7807	NaN	NaN	NaN
0.506	-94.351	52.5755	414.9638	-0.2832	0.26436	-0.23359	-71.27	-336.975	1400.2175	-1.2969	1.3584	-1.5352	-71.846	45.4759	-17.0221	0.22607	0.094727	0.061035	-30.322	175.3129	1043.1199	NaN	NaN	NaN
0.508	-75.99	43.52608	425.7984	-0.31475	0.23408	-0.26338	-26.853	-299.99	1436.2328	-1.3315	1.3892	-1.5659	-51.2273	17.968	-8.9376	0.20923	0.11303	0.047852	-61.3186	199.109	993.733	NaN	NaN	NaN
0.51	-69.477	48.2733	432.4307	-0.29717	0.28174	-0.22354	-35.553	-298.518	1439.972	-1.3592	1.4104	-1.5823	-42.367	63.7592	7.596	0.19727	0.12695	0.03125	-100.7033	204.446	965.04	NaN	NaN	NaN
0.512	-57.493	69.2919	429.62758	-0.33242	0.2418	-0.26191	-1.666	-304.39	1480.55	-1.3853	1.4321	-1.5972	-42.542	21.93	52.484	0.18555	0.15332	0.01709	-45.549	214.807	906.8338	NaN	NaN	NaN
0.514	-73.978	63.7756	433.311	-0.31152	0.30176	-0.21191	39.773	-250.188	1505.916	-1.4277	1.4824	-1.6191	-81.959	43.1167	35.9667	0.18213	0.16846	0.010742	-32.775	184.81	880.571	NaN	NaN	NaN
0.516	-75.891	54.6092	441.6649	-0.35557	0.24033	-0.26534	-22.197	-259.526	1563.387	-1.4531	1.5176	-1.6348	-31.626	37.9147	21.5211	0.17383	0.20166	0.0024414	-36.069	197.123	800.6763	NaN	NaN	NaN
0.518	-68.466	60.6292	445.5539	-0.34112	0.26582	-0.23789	-37.316	-224.66	1626.9167	-1.519	1.6001	-1.6714	-53.041	70.587	-5.335	0.16772	0.22022	0.00073241	-10.28	186.7748	801.368	NaN	NaN	NaN
0.52	-90.495	64.6935	456.6285	-0.37002	0.26152	-0.23985	-61.298	-166.945	1633.5012	-1.5584	1.678	-1.7	-30.921	65.218	38.36269	0.16406	0.24707	-0.0029297	-10.048	245.088	732.708	NaN	NaN	NaN
0.522	-74.996	59.3485	486.14903	-0.39326	0.23174	-0.26065	-112.5778	-146.984	1667.693	-1.5933	1.7466	-1.7241	-34.765	45.2122	50.6002	0.16064	0.28076	-0.016113	-45.515	244.95	736.505	NaN	NaN	NaN
0.524	-79.566	45.7695	507.3125	-0.37451	0.30908	-0.19629	-72.622	-74.472	1675.4211	-1.6045	1.8262	-1.7617	-39.484	54.6495	48.36	0.16553	0.2959	-0.027344	-25.219	275.822	654.216	NaN	NaN	NaN
0.526	-72.23	61.6532	512.0358	-0.44961	0.21875	-0.28105	-63.965	-74.949	1658.171	-1.5894	1.8579	-1.769	-67.602	31.28	19.1124	0.16846	0.3252	-0.056152	-27.582	214.463	639.537	NaN	NaN	NaN
0.528	-94.692	78.36	506.4979	-0.43857	0.25801	-0.24414	-73.574	-112.014	1680.7466	-1.5376	1.897	-1.7749	0.404999999999994	54.8726	20.12	0.17066	0.33545	-0.074952	-41.605	224.06	565.57722	NaN	NaN	NaN
0.53	-103.401	89.333	512.2378	-0.45303	0.2959	-0.21953	-56.28	-76.907	1692.195	-1.4909	1.8997	-1.7664	-40.525	22.826	49.217	0.17334	0.34766	-0.10547	-32.493	214.009	543.1276	NaN	NaN	NaN
0.532	-75.821	74.571	520.8183	-0.50391	0.23613	-0.29004	-99.3748	-128.718	1701.428	-1.4355	1.8848	-1.748	-44.184	72.177	36.6114	0.16943	0.36768	-0.15088	-43.022	228.155	505.0334	NaN	NaN	NaN
0.534	-103.511	88.2335	509.0439	-0.47217	0.32227	-0.23291	-53.322	-121.919	1748.3092	-1.3662	1.8379	-1.7051	-21.921	32.7427	46.4266	0.16113	0.37305	-0.1709	-86.0295	208.637	459.771	NaN	NaN	NaN
0.536	-91.736	79.4458	524.9627	-0.50078	0.33437	-0.24912	-46.784	-106.156	1733.471	-1.3389	1.8066	-1.6855	-18.42	79.39	34.7709	0.15674	0.39111	-0.19434	-56.649	162.273	419.2167	NaN	NaN	NaN
0.538	-96.61	75.5835	552.959	-0.5334	0.29727	-0.30615	-92.8347	-146.563	1754.1064	-1.3008	1.7324	-1.6367	-49.5436	16.7618	65.126	0.14477	0.41333	-0.23095	-63.46	147.684	337.465	NaN	NaN	NaN
0.54	-63.852	74.2428	573.7418	-0.50254	0.36328	-0.26045	-78.656	-104.6123	1780.174	-1.2744	1.6851	-1.5961	-32.617	56.225	43.16338	0.14111	0.4292	-0.25732	-63.973	129.588	322.947	NaN	NaN	NaN
0.542	-104.38	81.3831	594.8822	-0.50801	0.38379	-0.25801	-108.9141	-98.327	1748.592	-1.2578	1.6445	-1.5664	-46.01	17.1097	42.1137	0.1333	0.46338	-0.29639	-56.997	166.305	304.776	NaN	NaN	NaN
0.544	-105.267	91.5919	593.0109	-0.54834	0.35693	-0.29785	-131.462	-108.3425	1761.06	-1.2324	1.625	-1.5605	-41.697	73.958	-0.478000000000002	0.13428	0.48193	-0.31836	-87.799	154.2147	334.8803	NaN	NaN	NaN
0.546	-101.15	87.2916	600.4513	-0.53486	0.39034	-0.27744	-100.849	-54.413	1738.579	-1.2148	1.623	-1.5664	-29.016	30.5449	53.053	0.14307	0.51953	-0.36816	-108.8385	168.977	291.2465	NaN	NaN	NaN
0.548	-100.432	100.0704	600.3265	-0.53662	0.4247	-0.2542	-122.404	-84.2431	1699.8054	-1.1655	1.6333	-1.5601	-37.328	22.8334	66.319	0.14966	0.53858	-0.4104	-62.383	142.8978	270.654	NaN	NaN	NaN
0.55	-107.002	99.288	610.2521	-0.55342	0.41806	-0.27138	-60.843	-64.613289	1693.0142	-1.1311	1.6399	-1.5633	-69.7012	-43.679	101.0479	0.14893	0.55518	-0.44824	-76.8741	171.307	217.031	NaN	NaN	NaN
0.552	-124.153	100.0573	606.366	-0.55049	0.42529	-0.27861	-44.485	-37.697	1645.356	-1.0933	1.6392	-1.5581	-54.111	4.2465	97.8522	0.13721	0.57861	-0.49561	-97.6533	145.19104	237.9974	NaN	NaN	NaN
0.554	-107.033	91.8881	625.506	-0.53711	0.44727	-0.26465	-88.171	-60.315	1599.5647	-1.0562	1.6313	-1.5542	-38.871	0.6266	137.01	0.12109	0.58643	-0.51709	-58.693	179.541	199.362	NaN	NaN	NaN
0.556	-110.302	96.984	625.662	-0.53047	0.45215	-0.26387	-37.472	6.97249	1577.0804	-1.0317	1.6079	-1.5395	-78.765	38.012	183.7971	0.058594	0.58398	-0.57422	-83.672	168.485	194.429	NaN	NaN	NaN
0.558	-96.491	108.476	644.2001	-0.52618	0.45527	-0.26885	-61.764	18.8375	1522.538	-1.0039	1.5762	-1.5215	-76.759	20.9042	287.3625	-0.0041505	0.57862	-0.61767	-66.669	160.5914	142.433	NaN	NaN	NaN
0.56	-108.273	111.5923	658.4533	-0.51953	0.46114	-0.26611	-45.629	-3.1176	1536.044	-0.96533	1.5298	-1.4917	-107.878	20.0505	363.903	-0.087402	0.56982	-0.67041	-55.85459	133.3613	136.2295	NaN	NaN	NaN
0.562	-91.097	118.1519	652.3185	-0.52138	0.46865	-0.26651	-12.408	38.93	1521.4347	-0.94678	1.5024	-1.478	-88.713	35.7938	504.96	-0.24268	0.54639	-0.75	-19.864	109.90247	117.2818	NaN	NaN	NaN
0.564	-84.619	137.65	671.1929	-0.52686	0.46533	-0.27881	-47.731	-4.4077	1487.0512	-0.90967	1.4536	-1.437	-66.908	43.531	690.187	-0.33789	0.54102	-0.79102	-65.591	134.562	89.9012	NaN	NaN	NaN
0.566	-101.96	144.917	672.1073	-0.54336	0.47793	-0.28613	-18.507	28.28	1484.721	-0.87964	1.4123	-1.4153	-49.306	48.67	871.465	-0.57568	0.55908	-0.87256	-25.106	131.775	86.566	NaN	NaN	NaN
0.568	-103.466	136.597	697.821	-0.56387	0.48985	-0.29903	-29.486	49.805	1441.523	-0.85352	1.376	-1.3818	-92.287	36.568	986.087	-0.79175	0.59741	-0.93287	-29.227	143.165	101.0923	NaN	NaN	NaN
0.57	-104.858	126.6835	688.9815	-0.57949	0.50234	-0.30059	-55.314	14.7451	1425.5466	-0.82813	1.3262	-1.3496	-59.519	78.495	1089.928	-1.0269	0.68018	-0.98779	-34.747	92.875	108.976	NaN	NaN	NaN
0.572	-106.675	135.82983	680.097	-0.60049	0.52119	-0.30166	-8.58499999999999	26.739	1408.22305	-0.82178	1.3032	-1.3257	-91.566	66.819	1210.739	-1.3374	0.86572	-1.0532	5.91800000000001	83.931	105.0918	NaN	NaN	NaN
0.574	-120.031	143.2601	678.224	-0.62109	0.54102	-0.31055	-12.064	9.027	1365.9758	-0.81445	1.2607	-1.2813	-97.846	83.229	1323.38	-1.4883	0.99805	-1.0752	-29.764	29.323	99.8834	NaN	NaN	NaN
0.576	-104.872	142.7152	696.9023	-0.64776	0.56611	-0.32314	-11.741	-7.064	1360.6614	-0.80469	1.2217	-1.2525	-102.801	10.545	1386.478	-1.7402	1.3438	-1.1074	-24.394	56.4398	88.8676	NaN	NaN	NaN
0.578	-89.501	146.9972	700.9502	-0.66709	0.58975	-0.34365	11.338	33.284	1335.8984	-0.80127	1.1919	-1.2222	-111.796	-2.493	1334.27	-1.875	1.6026	-1.1519	-29.684	32.3447	102.471	NaN	NaN	NaN
0.58	-104.978	161.5777	695.161	-0.69209	0.62178	-0.36865	-47.377	20.05	1300.716	-0.79443	1.1392	-1.1792	-126.3182	-81.934	1301.625	-1.9238	1.8223	-1.252	6.119	51.444	52.9	NaN	NaN	NaN
0.582	-90.023	157.992	707.762	-0.71592	0.65303	-0.39355	-44.278	47.825	1296.294	-0.79297	1.1113	-1.1563	-84.621	-59.877	1269.387	-1.7358	2.0317	-1.3569	-61.6042	33.685	33.3743	NaN	NaN	NaN
0.584	-107.312	164.8245	730.3236	-0.73828	0.67969	-0.40918	-30.742	106.711	1243.5371	-0.77637	1.0605	-1.1172	-53.7219	-143.937	1312.579	-1.4199	2.0806	-1.3774	-20.42	10.6829	3.099	NaN	NaN	NaN
0.586	-72.497	163.9096	728.2062	-0.75791	0.71436	-0.42803	-63.152	113.366	1200.483	-0.75342	1.0298	-1.0893	-64.958	-127.303	1294.2418	-1.0547	2.0293	-1.3457	-61.0075	0.7351	24.6677	NaN	NaN	NaN
0.588	-116.481	158.9719	718.866	-0.78125	0.7457	-0.44102	-9.129	163.659	1166.8437	-0.7334	0.99609	-1.0615	-19.884	-173.182	1293.4983	-0.65381	1.7993	-1.2808	-57.325	0.27	13.678	NaN	NaN	NaN
0.59	-93.234	160.5939	709.906	-0.80039	0.77734	-0.46563	-68.1874	174.968	1114.715	-0.69287	0.94971	-1.0249	-41.33	-160.541	1270.296	-0.54248	1.645	-1.2476	-48.499	10.6005	24.683	NaN	NaN	NaN
0.592	-114.191	160.333	722.6532	-0.81797	0.80859	-0.49043	-86.944	173.052	1092.69	-0.67383	0.92578	-1.0078	-11.864	-211.36	1321.5908042	-0.479	1.3325	-1.1714	-38.548	19.3947	16.75	NaN	NaN	NaN
0.594	-112.224	172.173	724.0718	-0.83105	0.83594	-0.50977	-47.5465	202.637	1062.16987	-0.63281	0.87109	-0.9668	-56.915	-205.398	1368.8853	-0.56616	1.1702	-1.1316	-70.30017	38.9988	6.441	NaN	NaN	NaN
0.596	-115.587	172.959	724.385	-0.83369	0.86406	-0.53604	-83.023	171.7383	1013.778	-0.60035	0.83374	-0.93677	-60.495	-186.637	1433.462	-0.72754	1.0742	-1.123	-65.344	24.7288	23.716	NaN	NaN	NaN
0.598	-126.413	182.931	724.9355	-0.83545	0.89307	-0.55947	-42.738	159.8701	1004.0834	-0.57275	0.79102	-0.90625	-93.439	-174.18	1443.218	-0.98535	1.0723	-1.1367	-47.847	67.822	9.4618	NaN	NaN	NaN
0.6	-106.792	182.988	727.1415	-0.83466	0.90713	-0.58955	-36.934	171.83	942.195	-0.54053	0.74463	-0.87256	-68.3328	-171.09	1476.053	-1.1055	1.1133	-1.168	-96.0494	40.8681	18.9491	NaN	NaN	NaN
0.602	-103.019	178.5729	728.2328	-0.83594	0.92188	-0.60879	-60.6304	161.457	877.379	-0.52246	0.71484	-0.85156	-91.563	-242.526	1485.748	-1.2827	1.2271	-1.2534	-48.466	65.1096	-4.3737	NaN	NaN	NaN
0.604	-101.387	179.229	742.7093	-0.83545	0.94385	-0.62793	-13.714	188.0525	864.135	-0.49609	0.66602	-0.81348	-57.403	-268.875	1503.104	-1.3679	1.3191	-1.3367	-80.46176	31.9954	-4.0928	NaN	NaN	NaN
0.606	-105.362	176.186	730.90253	-0.84922	0.93281	-0.6584	-55.5397	197.0201	825.125	-0.47315	0.63037	-0.78907	-65.547	-329.071	1540.358	-1.4297	1.3926	-1.416	-75.504	42.95356	-8.188	NaN	NaN	NaN
0.608	-84.026	164.077	736.219	-0.85468	0.92226	-0.67636	-33.075	160.407	807.4216	-0.44971	0.5918	-0.76172	-43.407	-300.152	1579.25796	-1.4995	1.4751	-1.5171	-98.50297	40.1402	6.36	NaN	NaN	NaN
0.61	-89.547	161.026	724.354	-0.8586	0.91289	-0.6873	20.361	174.818	783.00535	-0.41797	0.53906	-0.71582	-23.922	-360.601	1614.7429	-1.5293	1.502	-1.5625	-35.333	51.29	21.377	NaN	NaN	NaN
0.612	-107.411	158.055	732.455	-0.86387	0.90567	-0.69629	-41.213	172.0695	737.7951	-0.40234	0.52051	-0.69775	41.68	-337.636	1634.7626	-1.5698	1.5366	-1.6187	-74.3795	52.5848	36.537	NaN	NaN	NaN
0.614	-102.638	153.531	760.202	-0.86816	0.89844	-0.71094	3.804	161.9418	744.525	-0.36328	0.47363	-0.6582	28.71	-356.062	1704.8631	-1.5877	1.553	-1.6433	-31.304	47.3126	29.2787	NaN	NaN	NaN
0.616	-104.131	150.013	756.033	-0.86885	0.88232	-0.72314	4.246	191.996	699.056	-0.33032	0.42797	-0.62255	3.378	-257.002	1744.805	-1.5957	1.5801	-1.6523	-47.6709	67.437	47.7786	NaN	NaN	NaN
0.618	-105.349	157.073	764.08	-0.86817	0.87539	-0.73672	-43.2392	189.1411	632.6973	-0.29932	0.3999	-0.60059	1.51	-240.016	1790.1237	-1.6143	1.6387	-1.6602	-29.35	56.8889	54.2349	NaN	NaN	NaN
0.62	-109.241	142.982	765.821	-0.87246	0.8625	-0.74805	17.66	198.983	587.8232	-0.26221	0.34473	-0.57275	-50.243	-167.551	1828.0746	-1.6343	1.6646	-1.6597	-33.89	84.902	64.165	NaN	NaN	NaN
0.622	-86.14	123.556	783.468	-0.86885	0.854	-0.75322	6.86	207.761	535.526	-0.24414	0.32031	-0.54785	-108.2956	-164.633	1866.694	-1.7051	1.7236	-1.6719	-15.041	48.1401	55.656	NaN	NaN	NaN
0.624	-75.336	108.131	786.69	-0.87695	0.83984	-0.76367	3.332	171.8529	514.844	-0.20947	0.2793	-0.50586	-91.505	-87.657	1867.873	-1.7725	1.7685	-1.6851	-43.519	50.8778	35.3507	NaN	NaN	NaN
0.626	-81.322	118.771	801.83	-0.87695	0.83632	-0.76738	28.617	189.294	491.278	-0.18164	0.23901	-0.47217	-68.867	-60.527	1856.374	-1.8374	1.8169	-1.7007	-35.777	23.4947	34.226	NaN	NaN	NaN
0.628	-71.147	119.844	855.43	-0.88789	0.82188	-0.77774	-9.842	184.1932	466.1908	-0.15918	0.20752	-0.44873	-69.701	-30.765	1841.0884	-1.8848	1.8984	-1.7324	-3.153	44.5577	39.589	NaN	NaN	NaN
0.63	-81.736	128.044	914.42	-0.89922	0.81445	-0.78789	7.002	158.2444	463.578	-0.12646	0.15967	-0.41016	-57.275	-85.442	1825.1501	-1.8882	1.938	-1.7456	-51.333	44.5356	58.8024	NaN	NaN	NaN
0.632	-74.121	136.337	965.97	-0.92773	0.79805	-0.80117	-19.921	177.093	424.3871	-0.11279	0.13184	-0.39111	-75.817	-104.408	1813.895	-1.875	2.0117	-1.7676	-3.162	56.358	43.783	NaN	NaN	NaN
0.634	-119.0198	155.51	1053.93	-0.9624	0.78564	-0.81787	-44.802	149.3701	397.6461	-0.075684	0.084473	-0.34912	-46.7356	-106.933	1818.0249	-1.8211	2.0442	-1.7732	-36.073	32.072	38.829	NaN	NaN	NaN
0.636	-110.7003	181.361	1131.35	-1.0121	0.76641	-0.83594	-15.043	158.606	378.12838	-0.050293	0.060303	-0.33887	-45.332	-93.47	1840.715	-1.7495	2.0493	-1.771	-31.435	23.6814	23.0295	NaN	NaN	NaN
0.638	-139.395	207.247	1204.13	-1.0695	0.75713	-0.85537	-62.9341	195.895	342.005	-0.032227	0.030762	-0.3208	-16.725	-90.513	1870.818	-1.6367	2	-1.7344	-60.982	19.0857	28.215	NaN	NaN	NaN
0.64	-127.275	226.58	1250.84	-1.1527	0.7458	-0.88233	-70.5037	165.562	339.1541	0.00097656	-0.0073242	-0.29248	-60.071	-104.251	1866.2197	-1.5796	1.9575	-1.7065	-10.248	9.4145	70.828	NaN	NaN	NaN
0.642	-140.622	218.069	1300.6	-1.2429	0.74678	-0.91201	-33.323	146.909	326.741	0.023438	-0.033203	-0.271	-67.525	-67.946	1844.771	-1.499	1.8418	-1.6367	-75.5402	29.6223	44.92	NaN	NaN	NaN
0.644	-133.436	196.4012	1333.53	-1.3472	0.75439	-0.92725	-101.314	115.834	291.9258	0.04248	-0.0625	-0.25537	-100.9385	-34.8345	1824.475	-1.4655	1.7541	-1.572	-28.711	-4.163	22.3133	NaN	NaN	NaN
0.646	-116.361	141.747	1381.51	-1.4564	0.78222	-0.95059	-55.792	74.347	286.196	0.055908	-0.07788	-0.2417	-95.16	31.1995	1820.089	-1.4473	1.6758	-1.5352	-52.2018	21.7099	10.494	NaN	NaN	NaN
0.648	-107.3251	98.74	1382.95	-1.5593	0.82705	-0.95888	-48.086	115.38	250.77354	0.070313	-0.10547	-0.2207	-107.3382	16.138	1814.774	-1.4409	1.6226	-1.4956	-73.5937	2.186	-6.677	NaN	NaN	NaN
0.65	-81.71	49.73	1403.46	-1.6542	0.88213	-0.971	-76.0517	99.696	235.9057	0.080566	-0.10449	-0.2124	-82.034	33.0539	1771.879	-1.4375	1.6133	-1.4824	-60.042	45.076	10.2821	NaN	NaN	NaN
0.652	-86.934	19.64	1382.99	-1.7263	0.9459	-0.99845	-37.335	93.375	223.9318	0.077148	-0.10547	-0.21143	-86.724	-10.4843	1717.054	-1.4019	1.6157	-1.4644	-63.103	41.1193	18.5534	NaN	NaN	NaN
0.654	-76.9069	-9.78	1354.61	-1.769	1.0181	-1.0269	-93.1792	129.5352	171.16	0.091309	-0.11914	-0.17725	-30.792	40.5537	1648.256	-1.352	1.6245	-1.4624	-59.489	52.0532	9.2593	NaN	NaN	NaN
0.656	-62.099	-31.18	1324.57	-1.758	1.0877	-1.0393	-71.18016	102.914	151.4162	0.091065	-0.11182	-0.17675	-30.581	16.787	1625.208	-1.2925	1.6274	-1.4487	-87.5427	22.16264	2.9568	NaN	NaN	NaN
0.658	-65.741	-48.48	1292.31	-1.7074	1.149	-1.0507	-20.663	109.8037	153.5952	0.085449	-0.10791	-0.1709	-46.567	87.1534	1585.409	-1.2026	1.6138	-1.4331	-58.736	22.1766	12.92962	NaN	NaN	NaN
0.66	-47.268	-58.29	1263.4	-1.6089	1.1895	-1.0515	-78.4288	117.8268	131.7437	0.073242	-0.09082	-0.1709	-63.97	68.6166	1575.656	-1.1665	1.5962	-1.4175	-98.7544	47.6901	20.95	NaN	NaN	NaN
0.662	-58.049	-61.72	1215.94	-1.466	1.2027	-1.0492	-45.213	79.41161	128.3878	0.068848	-0.078613	-0.17188	-25.244	138.97	1524.704	-1.105	1.5552	-1.3804	-37.991	56.12	28.144	NaN	NaN	NaN
0.664	-46.313	-48.87	1177.6	-1.2847	1.1772	-1.0405	-55.806	116.865	112.996	0.070313	-0.071289	-0.15381	-14.286	91.176	1530.423	-1.0766	1.5195	-1.3506	-60.294	79.427	32.563	NaN	NaN	NaN
0.666	-67.081	-31.34	1148.33	-1.0926	1.1219	-1.0422	-57.2298	95.4195	88.477	0.066407	-0.055176	-0.14673	-24.821	122.434	1497.314	-1.0542	1.481	-1.3237	-52.376	39.5732	16.68756	NaN	NaN	NaN
0.668	-40.47	-15.66	1110.26	-0.89609	1.0508	-1.0367	-5.603	62.1125	91.281678	0.061523	-0.039551	-0.14551	-36.884	88.066	1481.639	-1.0342	1.418	-1.291	-78.4585	61.399	-1.2103	NaN	NaN	NaN
0.67	-35.652	4.52999999999997	1054.39	-0.71523	0.96914	-1.0246	-32.641	87.1521	72.535	0.06543	-0.03418	-0.14063	-72.456	147.322	1449.9771	-1.019	1.3931	-1.271	-28.181	39.4377	22.4283	NaN	NaN	NaN
0.672	-10.518	22.8	1011.5	-0.57744	0.86787	-1.0314	-10.939	59.454	59.7099	0.066895	-0.016113	-0.13379	-61.72738	141.469	1450.862	-0.98584	1.3345	-1.2339	-19.33	80.713	33.8443	NaN	NaN	NaN
0.674	5.063	21.02	976.26	-0.44775	0.77734	-1.0576	11.367	80.167	39.69	0.06543	-0.010742	-0.12891	-29.693	153.109	1404.242	-0.95898	1.2915	-1.2006	-39.507	55.1288	56.42	NaN	NaN	NaN
0.676	24.997	10.17	958.67	-0.33066	0.70683	-1.0824	-30.261	93.6759	25.365	0.068115	-0.008545	-0.12646	-3.64	102.707	1381.0758	-0.92578	1.251	-1.1699	-23.098	67.128	57.523	NaN	NaN	NaN
0.678	31.006	-23.95	919.04	-0.23193	0.64502	-1.1057	-5.147	27.2832	47.4634	0.075195	-0.0083008	-0.12402	-15.714	118.331	1326.894	-0.88623	1.1997	-1.1255	-42.191	28.3909	36.708	NaN	NaN	NaN
0.68	31.796	-50.92	905.82	-0.14131	0.60713	-1.1202	-17.171	41.4154	40.7543	0.086426	-0.010254	-0.10449	-23.131	132.424	1297.663	-0.86523	1.1719	-1.0996	-13.711	21.1759	66.502	NaN	NaN	NaN
0.682	55.307	-79.733	902.42	-0.071777	0.55742	-1.1633	-42.066	27.002	40.5494	0.089355	-0.0087891	-0.104	-32.624	185.618	1254.467	-0.82227	1.1152	-1.0576	-46.767	12.8739	111.6918	NaN	NaN	NaN
0.684	47.545	-93.36	880.04	-0.0014648	0.51465	-1.1909	6.911	22.3933	57.27205	0.095703	-0.015137	-0.10059	-13.008	193.268	1216.374	-0.78369	1.0737	-1.022	-10.316	-2.12	138.662	NaN	NaN	NaN
0.686	22.035	-92.565	857.763	0.049316	0.47969	-1.2266	-44.4915	71.851	36.228	0.10425	-0.018311	-0.093017	-38.057	186.7536	1161.8543	-0.75391	1.0234	-0.99023	-45.9205	-2.098	128.731	NaN	NaN	NaN
0.688	28.994	-95.843	859.09	0.085058	0.44472	-1.2658	-46.202	35.4432	53.43	0.11084	-0.013184	-0.089844	2.566	209.763	1106.402	-0.7085	0.96533	-0.93896	-23.648	-43.302	165.66791	NaN	NaN	NaN
0.69	35.607	-96.681	857.286	0.10889	0.41816	-1.3111	-25.129	49.82	32.6167	0.13184	-0.022461	-0.075195	-21.936	210.149	1049.08205	-0.69336	0.93555	-0.9082	-67.128	-32.8	194.495	NaN	NaN	NaN
0.692	44.554	-102.583	868.383	0.12764	0.39492	-1.3426	-70.139	71.255	-11.6421	0.15186	-0.02832	-0.070313	-18.862	269.246	1005.512	-0.66162	0.88135	-0.87061	-67.069	-68.2221	298.703	NaN	NaN	NaN
0.694	41.715	-119.55	871.164	0.13721	0.37939	-1.3706	-26.922	30.0142	19.0984	0.16602	-0.032715	-0.06543	-99.028	246.324	964.035	-0.63012	0.82812	-0.83935	-67.657	-22.1683	427.424	NaN	NaN	NaN
0.696	59.723	-137.011	886.108	0.12246	0.37852	-1.3949	-44.701	54.431	21.571	0.1853	-0.048584	-0.062256	-64.98171	287.425	907.5856	-0.59473	0.79102	-0.80273	-69.139	-22.1731	572.142	NaN	NaN	NaN
0.698	69.149	-129.381	904.063	0.08252	0.38897	-1.4147	-83.1617	40.2804	33.73347	0.21045	-0.061035	-0.048828	-36.243	248.5018	868.7302	-0.54492	0.73633	-0.76074	-65.287	28.2781	718.587	NaN	NaN	NaN
0.7	76.551	-111.632	873.991	0.0020507	0.41045	-1.4386	-45.253	26.4788	40.3407	0.23438	-0.078613	-0.03418	9.198	291.935	813.8354	-0.5166	0.70898	-0.74219	-57.52822	1.993	878.045	NaN	NaN	NaN
0.702	73.9	-85.267	873.557	-0.10195	0.44502	-1.4643	-81.612	66.424	17.841	0.23438	-0.085449	-0.032715	-26.821	222.667	794.4738	-0.46826	0.65381	-0.70264	-77.5454	36.3956	1027.342	NaN	NaN	NaN
0.704	86.64	-67.574	886.893	-0.21973	0.48242	-1.4766	-58.28	28.736	35.6124	0.24658	-0.10498	-0.029297	-22.686	270.4444	727.0828	-0.4314	0.6106	-0.66919	-119.519	68.279	1171.585	NaN	NaN	NaN
0.706	68.762	-59.455	900.855	-0.33047	0.53711	-1.4896	-53.935	33.998	35.7628	0.25562	-0.13453	-0.011719	-56.2047	217.926	680.358	-0.38574	0.56885	-0.63818	-48.464	53.002	1267.694	NaN	NaN	NaN
0.708	54.348	-52.858	898.152	-0.43994	0.59541	-1.498	-96.8681	62.675	11.105	0.25049	-0.14551	-0.015625	-17.627	287.4631	611.265	-0.34424	0.51123	-0.59717	-126.9	24.6149	1303.118	NaN	NaN	NaN
0.71	29.527	-66.75	915.711	-0.53056	0.65947	-1.5018	-36.942	39.06	31.3351	0.22217	-0.15381	-0.03418	4.677	215.723	620.1539	-0.32129	0.48047	-0.58105	-137.414	-42.225	1299.304	NaN	NaN	NaN
0.712	34.137	-67.39	944.952	-0.61084	0.72471	-1.5074	-51.6528	56.877	26.241	0.2251	-0.17212	-0.0039064	11.475	229.8197	569.57	-0.27783	0.42773	-0.54297	-167.7446	-60.8983	1265.647	NaN	NaN	NaN
0.714	42.441	-76.831	964.587	-0.68164	0.7832	-1.5039	-75.6116	29.5108	57.009	0.21875	-0.17969	0.0083008	-31.56	165.594	559.061	-0.24658	0.38721	-0.51758	-154.654	-117.14	1238.031	NaN	NaN	NaN
0.716	36.668	-77.243	945.307	-0.73721	0.83311	-1.5033	-23.599	1.8293	51.679	0.20166	-0.16797	-0.00048828	-49.345	244.531	480.417	-0.21631	0.34375	-0.48633	-132.401	-92.378	1205.331	NaN	NaN	NaN
0.718	52.381	-76.678	937.71	-0.77725	0.8626	-1.4901	-48.177	33.0769	12.571	0.19629	-0.16309	-0.003418	-37.20563	231.379	468.93	-0.18018	0.28711	-0.44141	-104.92927	-137.547	1234.998	NaN	NaN	NaN
0.72	56.787	-70.949	937.196	-0.8085	0.88135	-1.4667	-23.593	22.033	31.859	0.18994	-0.13232	-0.0097656	-30.38	267.099	424.7564	-0.16553	0.25732	-0.43848	-110.846	-132.737	1219.973	NaN	NaN	NaN
0.722	83.742	-63.407	944.515	-0.82324	0.8748	-1.4455	-12.787	43.985	42.1883	0.1853	-0.10718	-0.019776	-37.382	207.787	395.052	-0.14014	0.20947	-0.40967	-133.503	-211.06	1216.421	NaN	NaN	NaN
0.724	66.019	-60.347	933.132	-0.82617	0.86328	-1.4219	-40.748	58.4185	38.3755	0.18213	-0.086914	-0.020996	-38.191	211.757	333.897	-0.10254	0.15869	-0.37451	-81.687	-229.61	1217.585	NaN	NaN	NaN
0.726	63.623	-60.482	922.719	-0.81484	0.84043	-1.397	5.519	28.9036	25.82026	0.18994	-0.069336	-0.023926	-13.559	189.9018	326.933	-0.089844	0.1333	-0.36426	-108.188	-268.692	1302.125	NaN	NaN	NaN
0.728	59.707	-58.575	937.194	-0.79336	0.81133	-1.3766	-9.252	54.847	5.548	0.18848	-0.057617	-0.024414	-11.864	217.9409	315.955	-0.063477	0.081055	-0.33643	-66.991	-247.377	1375.839	NaN	NaN	NaN
0.73	52.303	-50.469	901.841	-0.76368	0.76836	-1.3625	-39.785	28.426	44.487	0.18701	-0.04541	-0.022949	-27.081	183.993	314.05268	-0.042968	0.050049	-0.32104	-132.5264	-233.4	1404.986	NaN	NaN	NaN
0.732	28.604	-27.486	865.002	-0.72383	0.72226	-1.3418	20.134	13.1309	63.382	0.18457	-0.036132	-0.023681	-58.668	170.853	295.6545	-0.020996	0.019531	-0.30322	-140.895	-196.59	1371.798	NaN	NaN	NaN
0.734	16.024	-16.853	841.985	-0.68896	0.6792	-1.3257	-33.657	32.9312	40.4997	0.17871	-0.028809	-0.020508	-34.193	159.951	255.597	-0.00048828	-0.0092773	-0.28906	-152.116	-223.64	1366.667	NaN	NaN	NaN
0.736	13.452	-13.411	841.977	-0.66406	0.63867	-1.3133	-29.092	21.349	41.923	0.16406	-0.025391	-0.017578	-40.33	152.859	232.188	0.0097656	-0.025879	-0.28125	-84.646	-295.473	1418.95	NaN	NaN	NaN
0.738	20.195	-4.758	823.329	-0.64883	0.59512	-1.2977	4.343	27.195	24.4936	0.16113	-0.029785	-0.018066	-45.007	158.586	214.1982	0.024902	-0.050781	-0.26709	-131.9676	-322.33	1465.3548	NaN	NaN	NaN
0.74	6.3	-2.25	810.271	-0.6375	0.56973	-1.2825	-57.2091	21.365	28.64575	0.15723	-0.035156	-0.012695	-67.241	115.81	206.476	0.031982	-0.064941	-0.26441	-85.459	-370.845	1513.3393	NaN	NaN	NaN
0.742	33.702	-7.392	812.782	-0.63516	0.54873	-1.2703	-14.381	16.234	25.7112	0.1521	-0.041749	-0.011474	-93.50882	125.683	181.405	0.03418	-0.07959	-0.25586	-48.092	-375.612	1523.163	NaN	NaN	NaN
0.744	36.185	9.61	807.018	-0.63232	0.53955	-1.2554	-26.72	30.3368	-7.393	0.1499	-0.049316	-0.01416	-105.903	81.367	168.713	0.036621	-0.097168	-0.24268	-49.309	-401.915	1595.1104	NaN	NaN	NaN
0.746	52.704	9.307	783.975	-0.61875	0.53066	-1.2406	-52.725	27.19	16.1987	0.14502	-0.057617	-0.016602	-65.939	111.122	131.235	0.032227	-0.1001	-0.23584	-36.686	-348.77	1648.2696	NaN	NaN	NaN
0.748	19.224	9.987	751.74	-0.59932	0.53242	-1.2273	-45.396	17.0658	39.7207	0.14404	-0.055176	-0.011719	-39.461	52.227	148.19	0.022949	-0.10352	-0.23486	-18.41	-312.136	1709.5144	NaN	NaN	NaN
0.75	24.485	-1.941	742.42	-0.56806	0.5289	-1.2194	-65.1362	27.117	33.1544	0.14258	-0.063477	-0.015137	-46.626	81.0474	107.6096	0.0061033	-0.10107	-0.22998	-6.563	-236.181	1732.421	NaN	NaN	NaN
0.752	20.287	-4.269	738.274	-0.53106	0.52929	-1.2091	-41.148	22.9677	41.594	0.1394	-0.067139	-0.023682	-52.639	59.775	110.109	-0.012695	-0.089355	-0.22852	-109.4412	-225.25355	1775.9962	NaN	NaN	NaN
0.754	14.758	-6.772	713.145	-0.4917	0.52881	-1.1948	-58.9244	28.8022	18.285	0.13965	-0.066895	-0.026855	-58.364	113.16	41.45631	-0.032715	-0.072754	-0.22949	-103.606	-190.28	1828.462	NaN	NaN	NaN
0.756	-16.103	-16.372	702.472	-0.45166	0.51709	-1.177	-83.8911	40.7843	20.52468	0.13672	-0.070801	-0.029297	-56.922	51.0639	60.406	-0.04248	-0.060059	-0.22607	-150.696	-146.671	1836.631	NaN	NaN	NaN
0.758	-15.728	-14.514	705.345	-0.42187	0.50859	-1.1567	-50.218	41.157	21.293	0.13477	-0.071289	-0.030273	-69.658	68.435	13.575	-0.060059	-0.043945	-0.2207	-101.931	-85.546	1826.766	NaN	NaN	NaN
0.76	-15.465	-4.867	693.446	-0.39883	0.50507	-1.1336	-94.5235	45.9733	-3.657	0.13623	-0.07666	-0.036621	-66.369	9.6351	19.9633	-0.080322	-0.019775	-0.21826	-143.706	-57.971	1779.3261	NaN	NaN	NaN
0.762	-11.824	15.989	662.649	-0.38262	0.49668	-1.1069	-61.068	49.4054	5.181	0.1355	-0.078125	-0.03955	-63.008	52.203	-11.3237	-0.094238	0.0014648	-0.21338	-134.3836	-95.109	1753.155	NaN	NaN	NaN
0.764	-6.797	31.9894	646.744	-0.37451	0.48926	-1.0796	-27.482	42.357	7.714	0.1416	-0.080566	-0.045898	-36.496	43.6235	21.569	-0.1123	0.018066	-0.20264	-175.034	-106.117	1746.901	NaN	NaN	NaN
0.766	-2.182	41.9846	640.996	-0.36885	0.48545	-1.0493	-81.2564	28.7013	33.9431	0.14746	-0.08252	-0.053711	-67.633	56.1631	1.038	-0.12158	0.015625	-0.19531	-97.862	-119.504	1776.506	NaN	NaN	NaN
0.768	19.974	42.6529	620.503	-0.36797	0.48242	-1.025	-25.386	45.0541	34.9087	0.14795	-0.086914	-0.058594	-65.928	24.778	10.871	-0.12939	0.018066	-0.18555	-77.752	-97.07	1831.5072	NaN	NaN	NaN
0.77	5.738	35.517	581.824	-0.36016	0.475	-0.98907	-35.495	29.5493	20	0.15381	-0.095215	-0.064453	-44.679	27.3412	3.134154	-0.13819	0.015625	-0.16724	-95.168	-114.588	1864.1515	NaN	NaN	NaN
0.772	-2.514	45.455	568.312	-0.34902	0.46573	-0.96279	-62.061	30.9429	34.9919	0.15942	-0.0979	-0.074219	10.335	37.8735	7.673	-0.14648	0.0078125	-0.15234	-87.279	-102.307	1857.072	NaN	NaN	NaN
0.774	-2.53	44.6104	575.253	-0.33789	0.45117	-0.93164	-6.869	49.426	27.8056	0.1582	-0.10254	-0.088379	16.518	55.8027	25.50538	-0.14746	0.0029297	-0.13477	-167.838	-103.258	1817.028	NaN	NaN	NaN
0.776	2.91	48.89759	543.744	-0.31592	0.44238	-0.89853	-37.554	31.1382	26.2807	0.15234	-0.10352	-0.098145	-1.514	47.096	29.7683	-0.14648	0.00048828	-0.12305	-154.302	-47.296	1803.917	NaN	NaN	NaN
0.778	-13.292	47.2427	520.462	-0.29785	0.43086	-0.86797	-14.743	52.861	23.267956	0.15479	-0.10059	-0.10791	-43.31	27.312	38.7105	-0.13672	-0.017578	-0.10986	-174.495	0.0334999999999992	1793.864	NaN	NaN	NaN
0.78	-30.084	49.444	499.331	-0.28184	0.41875	-0.83398	-1.623	47.117	2.391	0.14551	-0.092285	-0.12451	-47.736	51.4148	12.2077	-0.12158	-0.028565	-0.10547	-140.133	20.5304	1792.282	NaN	NaN	NaN
0.782	-15.925	48.237	506.547	-0.25947	0.39971	-0.80439	-45.158	34.7312	30.5304	0.13697	-0.08545	-0.13843	-25.469	45.483	22.2352	-0.10352	-0.038086	-0.092285	-186.234	19.1409	1754.1255	NaN	NaN	NaN
0.784	-13.302	54.903	495.395	-0.24414	0.38525	-0.771	-14.815	64.2	53.6396	0.12598	-0.080566	-0.15283	-12.172	71.968	18.175	-0.086426	-0.055664	-0.081055	-109.278	-7.4621	1711.932	NaN	NaN	NaN
0.786	-15.967	46.9058	470.147	-0.23134	0.3624	-0.73545	13.88	27.165	43.7975	0.10498	-0.067383	-0.18701	-68.276	31.9709	56.7073	-0.079102	-0.064453	-0.078125	-103.0036	30.768	1669.854	NaN	NaN	NaN
0.788	-15.813	36.6711	462.433	-0.21738	0.34101	-0.70117	-16.212	46.0351	40.722	0.098145	-0.055176	-0.19971	-69.028	71.252	40.4034	-0.056641	-0.086914	-0.056152	-58.783	47.62	1647.655	NaN	NaN	NaN
0.79	-12.962	35.0036	451.247	-0.21113	0.32031	-0.6707	-20.118	55.155	25.80719	0.084961	-0.033203	-0.22607	-56.685	44.002	65.026	-0.050048	-0.098391	-0.038086	-72.968	101.9493	1628.1036	NaN	NaN	NaN
0.792	-2.016	43.5583	429.554	-0.19736	0.30274	-0.63633	-22.563	14.8961	32.3035	0.074218	-0.016845	-0.24756	-40.759	78.913	43.052	-0.041016	-0.11475	-0.021973	-69.491	89.1147	1593.8887	NaN	NaN	NaN
0.794	-17.93	57.7289	409.558	-0.18799	0.28369	-0.604	-22.419	70.091	34.45	0.067383	-0.00097656	-0.26807	-41.299	27.001	62.853	-0.02002	-0.13818	0.0019531	-67.868	104.782	1554.997	NaN	NaN	NaN
0.796	-14.047	57.1105	406.365	-0.1709	0.26651	-0.57783	-24.386	46.368	22.37774	0.043457	0.015625	-0.30371	-57.942	55.921	19.42	-0.0087891	-0.14648	0.013672	-68.367	91.236	1537.824	NaN	NaN	NaN
0.798	-11.074	62.766	406.048	-0.15469	0.24619	-0.55127	-54.8832	21.8446	41.0064	0.026855	0.032715	-0.30908	-47.562	25.1509	49.2875	0.027344	-0.15869	0.022949	-30.336	134.345	1538.9469	NaN	NaN	NaN
0.8	-21.267	65.7484	384.942	-0.14062	0.23095	-0.52627	-35.07	42.752	56.429	-0.021484	0.041504	-0.35107	-31.183	62.0174	17.216	0.047607	-0.16089	0.020264	-65.5181	137.466	1498.5191	NaN	NaN	NaN
0.802	-43.643	57.531	385.862	-0.1249	0.21563	-0.49824	-66.09045	-32.11	90.7096	-0.070557	0.04834	-0.36597	-38.744	27.098	73.7681	0.090332	-0.17236	0.031738	-44.798	159.118	1472.3196	NaN	NaN	NaN
0.804	-42.651	55.73	381.404	-0.11084	0.20166	-0.46729	-47.584	-6.64244	104.5884	-0.1333	0.047852	-0.37988	-77.758	22.422	52.8945	0.13477	-0.18604	0.045898	-109.115	173.843	1405.763	NaN	NaN	NaN
0.806	-17.826	47.589	379.315	-0.097264	0.18662	-0.44521	-28.902	4.8187	119.5283	-0.24463	0.052246	-0.41455	-58.578	-8.7149	61.204	0.15381	-0.19385	0.042969	-40.888	156.3515	1411.164	NaN	NaN	NaN
0.808	-12.578	44.694	346.201	-0.089649	0.17578	-0.42226	-73.8737	-31.871	154.886	-0.3125	0.058594	-0.44922	-68.348	32.225	23.3395	0.19336	-0.21338	0.050781	-26.98	189.2041	1385.9675	NaN	NaN	NaN
0.81	-30.697	43.993	343.168	-0.074805	0.16289	-0.40391	-30.686	38.822	184.177	-0.46582	0.056152	-0.52637	-41.865	25.2386	40.7233	0.21656	-0.22314	0.048095	0.815999999999995	165.415	1354.117	NaN	NaN	NaN
0.812	-42.415	69.619	334.83	-0.063965	0.15351	-0.379	-24.2764	-4.54457	251.231	-0.60669	0.074951	-0.6023	-63.331	26.713	47.25563	0.22852	-0.23291	0.043945	-23.899	200.322	1314.32	NaN	NaN	NaN
0.814	-18.49	69.608	323.253	-0.058105	0.14355	-0.36084	-45.353	32.534	368.783	-0.77588	0.07373	-0.66113	-56.157	10.96649	51.252	0.23828	-0.24414	0.041504	-33.725	169.692	1262.454	NaN	NaN	NaN
0.816	-16.678	71.566	319.72	-0.042676	0.13515	-0.33857	16.6661	94.6447	527.967	-1.0508	0.11279	-0.75195	-66.159	1.668	18.7982	0.24219	-0.24805	0.041992	-36.26	208.001	1214.8692	NaN	NaN	NaN
0.818	-27.745	62.1205	343.14	-0.035254	0.12959	-0.31778	-44.4329	10.771	731.591	-1.2075	0.14307	-0.80127	-26.518	20.6816	-10.4009	0.24756	-0.25342	0.047852	-68.0301	202.734	1162.816	NaN	NaN	NaN
0.82	-19.442	61.7088	357.564	-0.026269	0.11709	-0.30957	-42.321	66.39	845.718	-1.5527	0.25488	-0.91406	-20.487	12.313	12.034	0.24244	-0.26123	0.052246	-20.095	261.7553	1090.5483	NaN	NaN	NaN
0.822	-11.105	59.784	336.615	-0.02002	0.10771	-0.2956	15.052	50.8791	965.223	-1.8516	0.39673	-1.0654	-27.208	32.286549	10.953	0.23535	-0.26221	0.054199	-32.666	272.04	1027.475	NaN	NaN	NaN
0.824	-10.807	54.957	320.003	-0.0097656	0.1001	-0.28125	15.383	34.6861	1104.5594	-2.1362	0.55859	-1.2202	-22.586	34.6176	20.3742	0.2207	-0.25781	0.047852	-66.0745	276.642	991.7658	NaN	NaN	NaN
0.826	-34.914	63.572	310.38	-0.0039062	0.090429	-0.27012	20.3097	110.997	1199.4833	-2.4487	0.95947	-1.3628	-23.581	82.106	-7.197	0.2168	-0.24854	0.045898	-111.272	296.379	929.839	NaN	NaN	NaN
0.828	-28.186	65.814	306.741	0.002832	0.08789	-0.26328	22.8938	17.923	1292.411	-2.5684	1.2539	-1.4141	-42.514	36.7678	29.5615	0.20166	-0.23291	0.032227	-68.5776	286.536	923.0265	NaN	NaN	NaN
0.83	-14.755	59.699	287.538	0.0043945	0.084765	-0.26093	34.2047	32.805	1301.924	-2.7456	1.8188	-1.5991	-26.115	54.627	11.6728	0.19336	-0.21387	0.026124	-62.036	340.301	853.4013	NaN	NaN	NaN
0.832	-20.822	70.656	282.329	0.012402	0.0875	-0.25479	36.936	-7.672	1298.638	-2.687	2.0625	-1.7695	-34.145	11.3331	50.329	0.18359	-0.19824	0.015625	-25.662	314.5135	835.159	NaN	NaN	NaN
0.834	-25.65	63.578	293.256	0.012207	0.096191	-0.25293	44.6514	-95.015	1313.57	-2.3843	2.1118	-1.8413	-54.277	70.352	-3.5846	0.1875	-0.16699	0.0019531	-39.214	330.509	784.7236	NaN	NaN	NaN
0.836	-19.143	48.639	320.162	0.017188	0.10166	-0.24453	12.469	-56.748	1333.678	-1.6074	1.8945	-1.7109	-17.67	41.17414	28.248	0.18555	-0.15332	-0.0053711	-72.6902	295.4869	714.083	NaN	NaN	NaN
0.838	-1.77200000000001	50.3585	302.491	0.015527	0.10566	-0.24492	-2.393	-107.689	1335.888	-1.1953	1.7031	-1.6055	-21.915	62.4952	10.154	0.18994	-0.13281	-0.016113	-41.129	311.297	648.848	NaN	NaN	NaN
0.84	-20.056	51.2564	281.914	0.013965	0.1123	-0.23984	6.259	-111.017	1340.8021	-0.57764	1.2661	-1.4604	-66.7676	5.633	46.9365	0.18677	-0.11914	-0.030273	-23.29	282.467	631.1783	NaN	NaN	NaN
0.842	-9.86200000000001	56.82	292.333	0.013379	0.11699	-0.23799	-3.691	-69.854	1332.0714	-0.35742	0.98244	-1.4287	-46.501	28.788	14.0182	0.18359	-0.10742	-0.040039	-22.28	293.414	601.0061	NaN	NaN	NaN
0.844	-24.424	43.985	287.613	0.0097656	0.12451	-0.229	-18.544	-140.721	1339.749	-0.24805	0.76563	-1.4219	-32.866	19.016	30.531	0.17529	-0.097656	-0.043457	-30.573	234.216	560.88788	NaN	NaN	NaN
0.846	-10.119	49.892	278.042	0.0099607	0.13398	-0.22891	-8.57	-76.8043	1310.7748	-0.21729	0.59082	-1.3906	-45.612	72.251	17.54053	0.16797	-0.088379	-0.060547	-45.428	229.6996	501.292	NaN	NaN	NaN
0.848	-22.224	53.609	281.441	0.0082031	0.1373	-0.23242	-17.509	-65.229	1345.07251	-0.23291	0.5376	-1.3804	-28.502	51.578	59.5336	0.15479	-0.072754	-0.073242	-59.6113	245.317	440.669	NaN	NaN	NaN
0.85	-32.968	59.262	295.657	0.0015625	0.14394	-0.23164	-70.501	-40.126	1370.39445	-0.29443	0.53174	-1.394	-59.431	65.288	42.2616	0.14551	-0.057129	-0.084961	-38.776	239.769	445.2512	NaN	NaN	NaN
0.852	-31.506	50.404	298.902	-9.764e-05	0.15205	-0.23086	-72.8718	32.632	1401.941	-0.3479	0.56811	-1.4333	-77.3364	52.3218	47.2997	0.14014	-0.04248	-0.092773	-35.008	262.536	420.249	NaN	NaN	NaN
0.854	-29.923	52.2783	299.718	-0.0078125	0.16357	-0.22705	-75.6004	-35.556	1427.2819	-0.39111	0.61377	-1.4604	-64.008	65.7989	25.869	0.13281	-0.022461	-0.10791	-30.842	208.493	374.575	NaN	NaN	NaN
0.856	-26.644	45.571	306.64	-0.015039	0.16728	-0.22685	-116.917	-76.076	1365.812	-0.45557	0.63086	-1.4785	-40.279	47.9924	58.0471	0.13086	-0.01416	-0.11572	-29.197	206.79	324.18	NaN	NaN	NaN
0.858	-27.771	50.273	307.899	-0.01875	0.17353	-0.2293	-76.3715	-141.0236	1361.834	-0.49414	0.62109	-1.4824	-85.1502	41.6267	53.431	0.13525	0.0043945	-0.13818	-14.943	171.3649	310.712	NaN	NaN	NaN
0.86	-24.983	43.135	298.775	-0.028906	0.18252	-0.22774	-57.822	-226.063	1377.837	-0.60303	0.604	-1.5015	-50.206	50.789	42.076	0.14478	0.018311	-0.15552	-13.952	186.94735	284.57	NaN	NaN	NaN
0.862	-23.536	42.394	296.853	-0.033594	0.19131	-0.22871	-107.253	-184.6116	1412.369	-0.74023	0.64404	-1.5508	-64.518	40.987	47.6931	0.15576	0.030273	-0.1748	-14.871	182.877	272.947	NaN	NaN	NaN
0.864	-39.554	39.9159	305.745	-0.041992	0.19824	-0.23145	-63.6444	-222.88	1445.4244	-0.80615	0.68408	-1.5815	-46.44	56.899	32.1001	0.17139	0.036621	-0.2041	-25.896	176.3957	217.9395	NaN	NaN	NaN
0.866	-19.514	44.1493	310.527	-0.050196	0.20684	-0.23086	-22.297	-244.548	1405.893	-0.92773	0.79297	-1.6504	-52.373	13.881	40.0407	0.18164	0.039063	-0.21826	-55.4225	147.629	182.274	NaN	NaN	NaN
0.868	-28.173	55.951	314.44	-0.055274	0.21485	-0.2376	-15.093	-245.478	1433.621	-1.002	0.89209	-1.71	-40.944	18.1373	22.928	0.18848	0.043945	-0.24609	-68.7236	125.489	148.062	NaN	NaN	NaN
0.87	-31.765	67.429	325.24	-0.062305	0.22657	-0.23408	-11.798	-276.684	1490.74	-1.0566	0.98535	-1.7676	-54.77	-9.3	37.7331	0.1792	0.044922	-0.2793	-56.6155	129.499	131.556	NaN	NaN	NaN
0.872	-31.435	69.115	337.573	-0.069433	0.2331	-0.2374	-24.7382	-212.919	1519.6515	-1.0996	1.0771	-1.8594	-27.574	44.159	9.163	0.17627	0.049805	-0.29346	-30.559	109.301	122.1866	NaN	NaN	NaN
0.874	-14.224	53.5	351.93	-0.081055	0.23193	-0.23682	-15.985071	-166.2725	1557.475	-1.1113	1.1016	-1.9004	-19.96	16.374	72.96367	0.15039	0.061035	-0.32373	-51.698	122.061	110.882	NaN	NaN	NaN
0.876	-23.291	55.21	349.993	-0.088281	0.23711	-0.24189	10.0369	-131.041	1548.294	-1.1069	1.1333	-1.9722	-32.997	29.7083	32.5136	0.13208	0.072754	-0.33887	-61.708	76.0488	104.676	NaN	NaN	NaN
0.878	-28.244	53.539	343.092	-0.095508	0.24034	-0.24492	28.9526	-91.472	1567.528	-1.1159	1.1462	-2.0368	-44.207	-8.1986	49.838	0.11572	0.083496	-0.36035	-103.817	60.782	69.959	NaN	NaN	NaN
0.88	-23.067	59.16	341.044	-0.10371	0.24502	-0.24727	56.67	-121.159	1551.259	-1.1289	1.168	-2.0938	-56.441	44.531	0.5776	0.084961	0.11133	-0.38428	-65.825	48.631	66.192	NaN	NaN	NaN
0.882	-12.441	58.728	352.886	-0.10605	0.25069	-0.25273	54.861	-125.98	1528.044	-1.2012	1.2129	-2.1836	-17.392	22.2204	36.218	0.070801	0.12549	-0.3999	-46.479	71.354	43.0845	NaN	NaN	NaN
0.884	-21.67	62.692	356.173	-0.10889	0.25488	-0.25732	44.4194	-105.9859	1551.643	-1.2397	1.2407	-2.2202	-15.213	60.594	19.2375	0.057617	0.15918	-0.42773	-46.007	61.448	54.904	NaN	NaN	NaN
0.886	-12.68	71.062	371.79	-0.1166	0.26006	-0.25674	68.022	-97.483	1527.848	-1.3101	1.3013	-2.2534	-27.039	13.3329	48.2914	0.046875	0.18237	-0.44531	-56.932	72.1511	24.8646	NaN	NaN	NaN
0.888	1.411	65.127	398.07	-0.12178	0.26377	-0.25772	94.107	-80.238	1550.5019	-1.355	1.3301	-2.2647	-33.281	38.8393	-7.1727	0.036133	0.20752	-0.46777	-70.587	48.5569	-8.35	NaN	NaN	NaN
0.89	-8.39000000000001	65.328	386.719	-0.13584	0.2665	-0.26279	117.52	-83.7903	1589.66	-1.3931	1.3403	-2.2788	-15.57	2.597	12.241	0.011719	0.23242	-0.49219	-93.3661	43.093	-29.011	NaN	NaN	NaN
0.892	5.55099999999999	66.25	399.11	-0.1458	0.26191	-0.27324	111.375	-105.25828	1573.942	-1.3882	1.3228	-2.2612	-36.99	24.482	33.817	-0.0019531	0.24561	-0.50537	-65.5251	51.683	-14.35	NaN	NaN	NaN
0.894	-27.322	72.546	400.345	-0.16113	0.25781	-0.26953	83.039	-127.428	1617.605	-1.3691	1.3047	-2.2422	-49.398	-4.6875	90.933	-0.056152	0.25342	-0.51953	-7.439	47.982	37.7287	NaN	NaN	NaN
0.896	-17.875	74.848	411.365	-0.17783	0.25761	-0.27812	81.748	-111.429	1610.783	-1.3198	1.2632	-2.2026	-35.526	30.7771	123.8472	-0.1228	0.25855	-0.53052	-45.286	76.114	49.9398	NaN	NaN	NaN
0.898	-12.121	73.016	413.893	-0.19219	0.25977	-0.28047	31.575	-105.43	1605.376	-1.2727	1.2268	-2.1735	-9.007	29.9659	172.501	-0.21191	0.25586	-0.54102	-37.056	47.6445	38.7852	NaN	NaN	NaN
0.9	0.956000000000003	68.378	404.978	-0.21446	0.26406	-0.28789	16.8647	-71.8457	1601.827	-1.23	1.1763	-2.1519	-31.23	49.126	221.1084	-0.35693	0.23486	-0.54639	-67.862	60.5434	22.721	NaN	NaN	NaN
0.902	-14.056	71.329	442.347	-0.23223	0.26943	-0.29795	61.486	-56.942	1542.5637	-1.1655	1.1021	-2.1187	-13.2362	37.6062	303.027	-0.43359	0.22021	-0.55078	-43.811	49.4419	45.8088	NaN	NaN	NaN
0.904	-8.218	84.247	454.699	-0.25098	0.27686	-0.30859	5.7791	-62.2267	1546.589	-1.1343	1.0669	-2.105	-24.1777	42.691	446.296	-0.64014	0.19775	-0.5874	-10.819	77.727	45.958	NaN	NaN	NaN
0.906	-11.882	90.404	456.647	-0.25918	0.28828	-0.31953	49.042	-33.7362	1502.73455	-1.083	1.0156	-2.082	-13.2635	73.73257	604.936	-0.81641	0.17724	-0.61084	11.982	68.3509	40.221	NaN	NaN	NaN
0.908	-3.974	97.659	457.878	-0.26504	0.3	-0.33535	37.107	-60.334	1472.8922	-1.0532	1.0039	-2.0649	-23.689	76.6203	802.628	-1.0195	0.15137	-0.63281	-13.662	50.409	19.167	NaN	NaN	NaN
0.91	-5.63800000000001	85.488	483.142	-0.27012	0.30937	-0.35411	5.5077	4.975	1444.6224	-1.0229	1.0103	-2.0601	28.574	63.156	954.41	-1.3555	0.125	-0.6543	-42.767	11.19042	21.492	NaN	NaN	NaN
0.912	-1.657	90.651	486.075	-0.26905	0.31768	-0.36836	11.0781	33.3227	1387.317	-0.99023	1.0371	-2.0527	15.008	11.351	1127.237	-1.5469	0.11914	-0.66699	-49.404	-2.4065	56.1046	NaN	NaN	NaN
0.914	-2.481	86.97	487.138	-0.27002	0.32861	-0.38623	-23.5744	4.318	1397.232	-0.97266	1.0488	-2.043	13.247	35.815	1266.169	-1.9155	0.16162	-0.68994	-39.738	27.94247	73.103	NaN	NaN	NaN
0.916	9.71600000000001	88.985	492.313	-0.27364	0.33779	-0.4084	-12.334	57.165	1358.74	-0.92383	1.0645	-2.0195	-2.3064	26.0466	1419.229	-2.1929	0.25293	-0.71728	-7.109	41.9974	69.069	NaN	NaN	NaN
0.918	-10.13	96.486	516.426	-0.27637	0.34766	-0.42774	-25.747	40.841	1329.105	-0.88037	1.0689	-1.9809	-9.0527	63.4536	1450.637	-2.4409	0.40674	-0.70947	-46.984	60.787	68.586	NaN	NaN	NaN
0.92	-13.614	104.793	525.49	-0.28105	0.35938	-0.43945	-52.557	94.868	1321.727	-0.84521	1.0649	-1.9409	34.496	-9.935	1492.156	-2.834	0.63672	-0.74902	-73.677	13.2163	37.4543	NaN	NaN	NaN
0.922	-3.23399999999999	106.898	527.917	-0.29736	0.36318	-0.46025	-40.8861	122.545	1279.862	-0.81396	1.0356	-1.8765	26.5178	-49.307	1459.31	-3	0.7959	-0.80664	-67.7857	17.8469	28.872	NaN	NaN	NaN
0.924	8.128	106.876	551.831	-0.31152	0.37695	-0.4751	-78.511	79.302	1307.475	-0.80664	1.0176	-1.8438	5.578	-138.574	1492.426	-3.1309	1.168	-0.98145	-45.295	12.7083	43.093	NaN	NaN	NaN
0.926	5.05399999999999	105.635	567.197	-0.32959	0.37754	-0.49033	-58.8526	115.172	1287.231	-0.79834	0.96729	-1.7729	-41.257	-144.497	1447.926	-3.0027	1.4241	-1.1463	-37.637	33.16154	36.919	NaN	NaN	NaN
0.928	8.479	103.987	572.509	-0.35078	0.38633	-0.50722	-45.049	66.3635	1267.0081	-0.7876	0.92968	-1.725	-70.47	-206.2	1454.108	-2.6816	1.5957	-1.3047	-27.331	10.066	45.645	NaN	NaN	NaN
0.93	12.174	111.671	558.799	-0.36758	0.39883	-0.52363	-23.735	56.805	1256.658	-0.78027	0.89648	-1.6738	-70.532	-178.37	1422.6249	-1.9219	1.6387	-1.457	-52.0072	13.5034	3.523	NaN	NaN	NaN
0.932	14.859	118.09	567.277	-0.38535	0.41523	-0.53965	13.318	98.607	1202.9707	-0.75	0.86133	-1.6113	-30.64	-203.235	1423.053	-1.4922	1.5889	-1.4785	-79.27	2.456	-19.716	NaN	NaN	NaN
0.934	12.686	108.97	595.224	-0.40234	0.42676	-0.56055	-32.422	79.6783	1202.457	-0.72803	0.84619	-1.5757	-39.476	-145.7475	1409.159	-0.77295	1.3501	-1.4556	-52.479	30.032	-2.285	NaN	NaN	NaN
0.936	22.745	108.046	601.108	-0.4125	0.43867	-0.57578	-10.544	152.452	1156.6229	-0.66406	0.81934	-1.5117	-25.09	-156.02	1416.292	-0.46509	1.1316	-1.5075	-56.852	61.0885	24.522	NaN	NaN	NaN
0.938	15.21	116.55	611.837	-0.42139	0.45479	-0.59091	30.3697	145.76281	1125.655	-0.61352	0.79956	-1.4626	-73.789	-119.871	1460.9574	-0.26758	0.88086	-1.5703	-63.233	58.718	36.0746	NaN	NaN	NaN
0.94	25.134	114.96	634.091	-0.42959	0.46573	-0.60498	0.414000000000001	129.237	1126.3799	-0.5625	0.77539	-1.416	-102.3909	-107.006	1507.286	-0.15186	0.63525	-1.5767	-81.8305	53.323	18.9761	NaN	NaN	NaN
0.942	48.179	107.508	659.597	-0.44141	0.47646	-0.62832	10.113	158.7498	1070.72172	-0.51123	0.74072	-1.3472	-158.1232	-60.91	1527.166	-0.1543	0.55762	-1.5737	-71.034	27.666	-11.909	NaN	NaN	NaN
0.944	21.489	109.467	655.463	-0.44922	0.48145	-0.64258	-11.328	121.143	1046.712	-0.49609	0.72363	-1.3125	-122.0412	-62.437	1472.5143	-0.22803	0.4751	-1.5679	-84.675	44.72	-7.999	NaN	NaN	NaN
0.946	24.794	121.177	645.283	-0.45361	0.48721	-0.65537	-27.648	198.032	1016.198	-0.46289	0.6875	-1.2422	-103.473	-126.514	1453.515	-0.33276	0.4458	-1.5613	-23.909	43.1655	36.5563	NaN	NaN	NaN
0.948	15.677	124.639	653.605	-0.4583	0.49219	-0.66778	-32.738	200.692	982.936	-0.44947	0.65845	-1.177	-84.702	-211.2969	1468.664	-0.46387	0.43115	-1.5527	-28.71	72.1007	36.0515	NaN	NaN	NaN
0.95	38.708	126.908	654.976	-0.45947	0.49453	-0.68652	-36.635	181.41	984.889	-0.4375	0.63672	-1.1162	-108.104	-283.485	1535.7139	-0.68555	0.42383	-1.5293	-39.409	55.4632	29.1773	NaN	NaN	NaN
0.952	17.5	119.71	672.562	-0.45654	0.49648	-0.69727	-15.527	186.972	894.845	-0.42139	0.60596	-1.0444	-111.814	-283.608	1535.751	-0.81055	0.43457	-1.5283	-43.426	54.0633	1.821	NaN	NaN	NaN
0.954	14.24	120.906	686.445	-0.45703	0.49609	-0.71289	-52.566	131.22	878.038312	-0.41455	0.58838	-1.0054	-104.858	-311.82	1533.795	-1.0742	0.48535	-1.5391	-37.187	36.2784	16.67	NaN	NaN	NaN
0.956	38.84	120.023	713.191	-0.45449	0.49532	-0.73106	-48.258	164.7904	850.9818	-0.3916	0.56396	-0.92773	-55.275	-286.438	1507.765	-1.2659	0.55347	-1.5633	-36.001	54.4646	37.7231	NaN	NaN	NaN
0.958	39.199	138.971	717.826	-0.45644	0.49414	-0.74297	-51.93	141.126	810.121	-0.37329	0.54003	-0.87353	-79.323	-317.702	1560.162	-1.4546	0.63721	-1.6089	-20.061	81.4721	58.021	NaN	NaN	NaN
0.96	21.379	137.078	708.827	-0.45175	0.49375	-0.75039	-67.636	135.691	800.432	-0.34863	0.51563	-0.8125	-41.897	-262.196	1572.984	-1.6948	0.77002	-1.6636	-19.713	61.439	39.06957	NaN	NaN	NaN
0.962	15.98	140.117	717.389	-0.45371	0.49385	-0.76172	-45.713	160.5756	725.6782	-0.32764	0.48877	-0.75342	-48.771	-246.496	1617.19783	-1.8008	0.83984	-1.7012	-68.533	64.319	31.7649	NaN	NaN	NaN
0.964	20.291	140.994	720.05	-0.45313	0.49219	-0.77148	-75.524	122.228	717.77	-0.30811	0.47412	-0.71436	-36.8807	-159.3198	1620.5187	-1.9819	1.0044	-1.7905	-54.113	20.7086	44.217	NaN	NaN	NaN
0.966	15.286	156.756	715.462	-0.44844	0.49043	-0.78203	-74.7928	162.5582	679.6095	-0.28174	0.43506	-0.64209	-46.936	-145.437	1659.483	-2.0535	1.0974	-1.8513	-30.317	37.661	76.577	NaN	NaN	NaN
0.968	9.014	148.975	705.878	-0.43887	0.4959	-0.79746	-94.2583	142.874	646.2586	-0.26269	0.40356	-0.58398	-38.3665	-50.581	1626.095	-2.0801	1.166	-1.9023	-11.174	22.24725	86.418	NaN	NaN	NaN
0.97	22.618	138.259	724.793	-0.42637	0.48926	-0.80527	-105.8647	156.86	650.364	-0.24805	0.38135	-0.5415	10.081	-40.497	1602.4504	-2.0562	1.1938	-1.9448	-29.795	47.571	61.189	NaN	NaN	NaN
0.972	20.118	136.919	755.451	-0.41641	0.49473	-0.81758	-89.16576	190.2258	574.864	-0.22852	0.34375	-0.48145	35.491	30.721	1567.141	-2.0469	1.1875	-1.9785	-19.506	25.7124	46.224	NaN	NaN	NaN
0.974	14.625	145.194	757.802	-0.39648	0.49121	-0.82617	-67.089	152.149	567.5344	-0.21045	0.32764	-0.45068	55.08	-18.861	1578.852	-2.0039	1.1641	-2.0215	-72.57743	20.7405	13.539	NaN	NaN	NaN
0.976	8.878	153.717	736.271	-0.37656	0.49033	-0.8461	-60.219	173.244	509.653	-0.17529	0.30518	-0.37939	25.645	0.136000000000003	1584.959	-1.9841	1.1595	-2.0378	-59.585	13.202	10.8032	NaN	NaN	NaN
0.978	6.735	162.202	746.494	-0.35782	0.48652	-0.85899	-67.283	134.0746	463.986	-0.14014	0.28296	-0.33447	14.8419	-69.098	1617.69885	-2.0015	1.1587	-2.0444	-21.678	7.9189	26.0252	NaN	NaN	NaN
0.98	14.505	162.266	753.302	-0.34961	0.48614	-0.87617	-83.4243	135.1242	480.0504	-0.10498	0.2583	-0.2876	32.2958	-24.5968	1623.7783	-2.0684	1.1875	-2.0527	-36.968	23.536	40.7769	NaN	NaN	NaN
0.982	22.586	172.892	739.296	-0.34141	0.48613	-0.89297	-62.3664	167.029	415.547	-0.063477	0.22266	-0.22852	62.149	-86.315	1629.9484	-2.105	1.2095	-2.0522	-50.726	11.6117	42.2735	NaN	NaN	NaN
0.984	20.296	177.407	733.558	-0.33984	0.4873	-0.90723	-51.698	117.742	410.1586	-0.041504	0.20117	-0.20801	60.011	-45.94	1637.7374	-2.1543	1.2461	-2.041	-82.899	28.4598	27.62688	NaN	NaN	NaN
0.986	8.13499999999999	169.628	737.797	-0.34062	0.4957	-0.92363	-29.629	151.1612	369.492	-0.022461	0.17725	-0.17236	36.968	-88.979	1630.2624	-2.1435	1.2363	-2.0205	-87.0656	19.2194	22.4752	NaN	NaN	NaN
0.988	29.509	157.074	759.326	-0.34483	0.50557	-0.93584	-13.85	106.0117	340.246	0.0019532	0.12426	-0.11743	19.4641	-28.7	1640.117	-2.1011	1.1919	-1.9878	-68.6376	40.9301	37.938	NaN	NaN	NaN
0.99	25.115	167.456	752.995	-0.34678	0.51963	-0.94912	-28.818	125.3915	348.6063	0.019043	0.10254	-0.077637	14.244	-58.5965	1622.01	-1.9824	1.0703	-1.918	-19.137	32.33457	33.8987	NaN	NaN	NaN
0.992	5.68000000000001	169.37	750.98	-0.35156	0.53418	-0.96484	-1.18	166.832	306.563	0.037598	0.063477	-0.030273	19.6855	-6.262	1623.117	-1.9077	0.99756	-1.8804	-61.6164	40.8539	1.3756	NaN	NaN	NaN
0.994	-1.09099999999999	184.39	767.029	-0.35059	0.54736	-0.97412	-4.372	118.3082	335.884	0.047852	0.053711	-0.016113	29.391	-68.024	1568.592	-1.7632	0.85693	-1.8081	-63.209	20.8017	-14.859	NaN	NaN	NaN
0.996	39.552	187.11	765.677	-0.35264	0.56572	-0.99052	-19.521	157.979	311.465	0.07666	0.029785	0.028809	28.338	-4.334	1513.9952	-1.6719	0.771	-1.7583	-53.369	44.369	-26.614	NaN	NaN	NaN
0.998	13.501	200.114	743.711	-0.35293	0.58262	-1.0039	-14.049	99.107	297.614	0.087402	0.036622	0.048828	16.023	-0.0390000000000015	1434.988	-1.6035	0.7168	-1.7188	-57.984	44.443	-1.316	NaN	NaN	NaN
1	15.191	205.658	734.882	-0.35839	0.60058	-1.014	-11.567	104.7804	291.837	0.097656	0.026855	0.057617	-23.989	96.74	1386.08	-1.5327	0.67432	-1.6812	-56.296	47.87945	16.95733	NaN	NaN	NaN
1.002	8.453	202.947	751.889	-0.3706	0.61328	-1.0229	24.362	140.222	236.174	0.12256	0.039063	0.077637	-42.1129	71.7911261	1391.169	-1.5059	0.66602	-1.6641	-31.599	53.7472	20.9009	NaN	NaN	NaN
1.004	35.103	198.509	753.725	-0.38428	0.63135	-1.0269	-7.856	74.666	243.6935	0.15039	0.041992	0.092285	-51.457	95.917	1392.1763	-1.459	0.65723	-1.625	-52.987	51.553	14.821	NaN	NaN	NaN
1.006	10.851	195.408	757.025	-0.40489	0.65167	-1.0259	-36.068	128.5356	205.7535	0.18848	0.040039	0.1167	-54.5587	55.6064	1344.136	-1.4302	0.65576	-1.602	-44.1248	80.47	48.08078	NaN	NaN	NaN
1.008	-7.09899999999999	195.357	747	-0.42472	0.66906	-1.0261	-25.829	94.533	159.663	0.19507	0.047852	0.11548	-62.917	114.768	1297.0548	-1.3862	0.65674	-1.5747	-31.009	65.887	46.7418	NaN	NaN	NaN
1.01	3.474	210.427	761.17	-0.447	0.68742	-1.0264	-47.263	105.8769	175.8688	0.21436	0.05127	0.12988	-39.951	114.894	1245.181	-1.3164	0.66992	-1.5352	-46.941	76.579	65.599	NaN	NaN	NaN
1.012	19.036	209.019	752.055	-0.4673	0.70987	-1.0245	-9.253	140.448	133.481	0.24463	0.064453	0.1416	-97.8654	159.936	1221.349	-1.2512	0.67847	-1.5002	-15.327	36.6227	66.5635	NaN	NaN	NaN
1.014	14.472	210.687	732.814	-0.48193	0.729	-1.0249	-61.739	65.6864	170.783	0.24219	0.06543	0.13623	-72.983	140.33	1179.597	-1.1914	0.68359	-1.4707	-25.52	15.1111	71.14	NaN	NaN	NaN
1.016	-6.16499999999999	217.863	734.007	-0.49081	0.74743	-1.0174	-52.777	127.976	163.508	0.26025	0.065918	0.146	-90.3924	147.089	1162.0122	-1.1167	0.67725	-1.4175	-33.991	-23.17469	87.256	NaN	NaN	NaN
1.018	1.43299999999999	226.803	735.26	-0.50038	0.75814	-1.0176	-60.3436	99.532	132.133	0.25732	0.074707	0.13721	-49.742	106.001	1136.3102	-1.0806	0.67871	-1.3877	-38.388	-26.281	103.043	NaN	NaN	NaN
1.02	-2.02200000000001	218.291	717.176	-0.50156	0.77339	-1.011	-91.096	84.9377	151.964	0.26221	0.074707	0.1377	-55.529	113.62	1125.4517	-1.021	0.67432	-1.3354	-6.483	-27.826	158.597	NaN	NaN	NaN
1.022	-7.413	209.872	711.213	-0.50808	0.7829	-1.0052	-60.3095	122.272	107.53	0.27002	0.063965	0.16553	-53.037	121.946	1102.243	-0.98633	0.66455	-1.2783	-29.093	-38.484	211.7229	NaN	NaN	NaN
1.024	-11.542	208.306	726.268	-0.51904	0.78564	-1.0015	-79.221	47.288	110.2197	0.27051	0.051026	0.18262	-65.261	185.318	1061.923	-0.95068	0.65283	-1.2261	-13.857	-30.0759	278.9156	NaN	NaN	NaN
1.026	-2.18400000000001	207.878	735.893	-0.53449	0.78377	-0.99216	-66.548	110.1904	62.1069	0.24561	0.051758	0.17041	-66.005	204.9498	1010.107	-0.90039	0.63477	-1.1445	-9.73	-49.9848	354.64	NaN	NaN	NaN
1.028	7.88200000000001	204.954	729.418	-0.55253	0.79064	-0.9837	-60.8132	70.5433	41.535	0.23096	0.037598	0.17139	-34.688	212.0602	953.7299	-0.87402	0.62207	-1.1035	-14.195	-3.5015	529.79	NaN	NaN	NaN
1.03	-10.106	194.881	711.696	-0.5696	0.79002	-0.97124	-83.0827	39.666	64.829	0.22266	0.03418	0.17383	-47.846	178.801	921.4633	-0.82227	0.59375	-1.0254	-20.787	37.9052	732.908	NaN	NaN	NaN
1.032	-13.112	197.91	716.637	-0.58754	0.79823	-0.96138	-74.9556	61.54674	51.919	0.20508	0.040039	0.1665	-81.025	173.437	891.916	-0.7793	0.56299	-0.95703	-41.443	62.28393	929.208	NaN	NaN	NaN
1.034	-7.53399999999999	182.0955	723.658	-0.59619	0.80713	-0.95605	-61.216	0.692999999999998	88.518	0.20239	0.045166	0.16016	-56.967	206.388	851.928	-0.72949	0.5332	-0.89063	17.535	8.1558	1074.103	NaN	NaN	NaN
1.036	1.66	184.3802	701.82	-0.59326	0.81872	-0.95089	-30.944	72.8132	71.391	0.20361	0.043457	0.16357	-62.958	247.296	800.115	-0.67578	0.49316	-0.80664	-46.9118	2.6268	1219.194	NaN	NaN	NaN
1.038	-7.096	175.7259	700.73	-0.58518	0.8372	-0.95117	-44.532	55.9175	53.01869	0.20703	0.044434	0.16406	-54.181	276.456	751.182	-0.64648	0.46484	-0.75781	-14.551	2.806	1371.427	NaN	NaN	NaN
1.04	-32.712	170.627	716.08	-0.57349	0.85402	-0.95256	-46.927	38.0438	63.833	0.19922	0.049316	0.16016	-80.107	250.177	709.107	-0.5918	0.41992	-0.6709	-1.8098	42.0997	1483.326	NaN	NaN	NaN
1.042	-8.074	150.137	740.36	-0.56155	0.87237	-0.95313	-30.292	79.882	26.61	0.18359	0.046875	0.15186	-57.95	232.627	680.3865	-0.55371	0.38574	-0.60595	-3.876	50.5501	1515.113	NaN	NaN	NaN
1.044	-21.542	160.259	740.76	-0.55713	0.88281	-0.9541	-32.744	23.3834	44.344	0.17212	0.04834	0.14942	-61.192	221.6211	640.2265	-0.51953	0.35938	-0.54004	-35.5168	16.8	1497.554	NaN	NaN	NaN
1.046	-0.634999999999991	179.885	767.54	-0.55272	0.90142	-0.95342	-5.422	60.033	32.0476	0.16162	0.046387	0.13428	-43.46	252.801	627.6388	-0.48096	0.32227	-0.45947	-15.0484	-61.112	1453.152	NaN	NaN	NaN
1.048	-21.806	202.82	837.06	-0.5498	0.91571	-0.95487	3.558	16.9365	29.824	0.13916	0.054688	0.12793	-38.773	227.047	599.9515	-0.45654	0.30518	-0.43115	-25.8404	-133.677	1399.173	NaN	NaN	NaN
1.05	14.558	209.065	877.06	-0.56355	0.93326	-0.95921	-5.65900000000001	-13.867	55.5159	0.12891	0.056152	0.12305	-46.768	219.055	555.1124	-0.4126	0.26221	-0.35547	-38.565	-121.468	1382.171	NaN	NaN	NaN
1.052	28.95	206.721	909.22	-0.57884	0.94536	-0.96856	-1.241	24.68125	-9.849	0.11523	0.063965	0.10645	-74.21	167.279	496.71915	-0.37085	0.22754	-0.30639	-56.707	-132.048	1370.971	NaN	NaN	NaN
1.054	39.464	234.422	962.79	-0.59814	0.94775	-0.98486	-7.675	-0.708	19.2049	0.10547	0.077393	0.097656	-85.074	172.095	449.4312	-0.33252	0.19629	-0.25684	-72.275	-132.448	1374.7939	NaN	NaN	NaN
1.056	36.8852	256.395	1044.11	-0.62708	0.95377	-1.0053	-25.936	51.723	2.4135	0.10742	0.090332	0.087891	-63.001	126.637	448.8359	-0.2876	0.14453	-0.18945	-61.734	-144.905	1331.244	NaN	NaN	NaN
1.058	41.0205	230.22	1112.45	-0.66738	0.95614	-1.0236	-12.439	33.162	15.4593	0.11279	0.10498	0.07959	-84.605	139.7351	424.707	-0.26465	0.11963	-0.15479	-51.463	-142.3766	1321.515	NaN	NaN	NaN
1.06	64.84	197.93	1146.11	-0.72247	0.96603	-1.0445	-9.243	14.856	29.0598	0.11475	0.11182	0.075684	-82.50519	115.7954	404.80815	-0.22266	0.077148	-0.089355	-27.527	-167.237	1346.454	NaN	NaN	NaN
1.062	33.603	159.54546	1178.66	-0.78737	0.97483	-1.057	-35.692	43.2576	-14.666	0.13232	0.13037	0.070313	-82.503	162.84	344.6432	-0.20166	0.046143	-0.049316	-68.031	-102.98	1422.3926	NaN	NaN	NaN
1.064	29.56	142.432	1232.64	-0.85449	0.99023	-1.0781	-25.763	1.242	43.6706	0.1477	0.14062	0.069336	-64.3483	128.861	323.3729	-0.17773	0.02002	-0.0097656	-98.175	-57.8	1475.7878	NaN	NaN	NaN
1.066	25.062	89.484	1273.44	-0.91528	1.0164	-1.0978	-36.078	56.4548	39.9333	0.15918	0.14453	0.073242	-79.353	147.735	279.3254	-0.14404	-0.011719	0.034668	-128.983	-17.56	1478.971	NaN	NaN	NaN
1.068	20.948	44.05	1281.94	-0.97313	1.0486	-1.11	-38.85	33.3738	28.0129	0.17383	0.15088	0.072266	-76.724	97.098	268.6431	-0.13428	-0.019531	0.049316	-83.41673	-45.87	1462.792	NaN	NaN	NaN
1.07	6.785	7.22	1277.74	-1.012	1.0884	-1.125	-55.224	45.07726	37.2994	0.17969	0.15186	0.077148	-75.066	156.491	224.743	-0.099121	-0.049805	0.098145	-52.4501	-129.592	1432.961	NaN	NaN	NaN
1.072	0.410000000000004	-38.24	1267.77	-1.0353	1.1227	-1.134	-51.505	72.076	-15.552	0.19482	0.14307	0.080566	-35.971	129.212	218.8531	-0.07373	-0.067871	0.12256	-41.679	-219.817	1464.789	NaN	NaN	NaN
1.074	11.094	-71.66	1243.27	-1.0366	1.1626	-1.1304	-58.8968	16.9861	23.56899	0.20044	0.13843	0.091064	-36.349	167.804	195.555	-0.053711	-0.087402	0.13818	-57.824	-258.081	1518.173	NaN	NaN	NaN
1.076	-13.448	-89.647	1215.83	-1.0065	1.1968	-1.1248	-64.792	60.768	15.0394	0.20898	0.13525	0.1001	-38.109	93.3	193.3254	-0.035645	-0.10645	0.15479	-70.471	-266.168	1552.456	NaN	NaN	NaN
1.078	-10.013	-90.739	1178.88	-0.94264	1.2262	-1.0967	-80.1455	30.8048	4.28	0.22119	0.11963	0.10498	-47.038	134.8848	146.9991	-0.029785	-0.10889	0.17041	-22.039	-288.342	1544.483	NaN	NaN	NaN
1.08	2.581	-106.612	1145.03	-0.85084	1.2477	-1.0534	-88.3318	38.7442	27.8837	0.22168	0.11523	0.11035	-59.189	103.9115	124.289	-0.011719	-0.11328	0.1958	16.2757	-282.977	1530.938	NaN	NaN	NaN
1.082	-13.785	-122.687	1101.18	-0.72634	1.243	-1.0005	-56.9789	59.469	-8.65	0.22949	0.099121	0.11279	-58.571	171.343	95.1081	-0.0039062	-0.10278	0.2041	49.07	-300.165	1572.106	NaN	NaN	NaN
1.084	-3.704	-113.709	1066.51	-0.58008	1.2207	-0.95117	-75.4756	14.8868	40.4533	0.22999	0.086425	0.11475	-7.535	96.402	115.0023	0.0073242	-0.099121	0.2168	22.813	-233.698	1607.2514	NaN	NaN	NaN
1.086	-20.022	-94.347	1044.69	-0.43235	1.171	-0.8979	-67.6326	70.649	28.7195	0.22998	0.074707	0.11572	-34.944	122.01	105.925	0.022461	-0.081055	0.22803	1.197	-199.733	1640.09705	NaN	NaN	NaN
1.088	-35.765	-88.236	1020.96	-0.30383	1.1099	-0.83824	-29.736	30.426	40.7494	0.22461	0.062012	0.11182	-27.164	52.579	119.288	0.026367	-0.07373	0.23145	-59.775	-114.766	1665.705	NaN	NaN	NaN
1.09	-52.477	-94.774	984.67	-0.20066	1.0486	-0.77769	-47.983	43.2167	60.058	0.21875	0.055664	0.11328	-27.82	101.8104	83.0781	0.016602	-0.052734	0.22363	-25.0148	-64.936	1658.397	NaN	NaN	NaN
1.092	-79.0804	-103.774	957.099	-0.13225	0.98928	-0.72326	-54.735	72.124	22.76137	0.20654	0.059082	0.11035	-11.907	55.857	70.3449	0.023926	-0.033936	0.22656	43.232	-28.316	1629.6442	NaN	NaN	NaN
1.094	-85.19718	-112.971	925.623	-0.10791	0.93604	-0.66943	-39.682	19.2173	44.9616	0.19922	0.061768	0.10108	-38.293	89.231	40.9934	0.031738	-0.016602	0.23145	62.222	-15.389	1604.532	NaN	NaN	NaN
1.096	-98.6503	-133.145	912.753	-0.12901	0.89902	-0.62694	-4.249	68.767	22.825	0.19873	0.07373	0.095215	-19.301	48.602	48.1709	0.034668	0.0063477	0.23242	52.4998	-16.527	1588.003	NaN	NaN	NaN
1.098	-90.323	-148.829	895.28	-0.18049	0.87597	-0.58905	-16.792	25.69813	16.509	0.2002	0.088867	0.067871	-42.599	107.174	38.6524	0.026367	0.016602	0.23193	38.8933	-34.154	1601.515	NaN	NaN	NaN
1.1	-105.226	-169.923	887.7367	-0.25119	0.87051	-0.56796	-32.587	28.4747	47.032	0.20361	0.097656	0.057129	-31.29	64.159	36.6122	0.024414	0.03125	0.24072	23.67331	-36.647	1573.84	NaN	NaN	NaN
1.102	-84.417	-168.929	902.0855	-0.33409	0.88233	-0.55888	-5.137	46.317	27.3908	0.2085	0.11816	0.041504	-24.507	79.64	27.053	0.034424	0.044434	0.24316	37.20738	-40.489	1578.6416	NaN	NaN	NaN
1.104	-67.643	-187.778	914.8179	-0.41162	0.9126	-0.56299	-36.938	0.7036	59.746	0.21094	0.13965	0.026611	-68.8775	27.1004	39.3616	0.041016	0.054199	0.24609	76.528	-74.907	1585.486	NaN	NaN	NaN
1.106	-86.588	-213.257	942.701	-0.47695	0.97089	-0.58027	-8.74	58.493	38.4892	0.20898	0.16357	0.0083008	-83.498	64.513	36.2682	0.051758	0.060059	0.24609	81.682	-76.329	1607.5484	NaN	NaN	NaN
1.108	-90.103	-243.857	973.099	-0.52637	1.0356	-0.60039	6.832	28.9397	33.6924	0.2085	0.19238	-0.015137	-62.4295	46.32	27.098	0.062988	0.063477	0.25049	50.1082	-106.325	1597.683	NaN	NaN	NaN
1.11	-93.792	-251.972	985.914	-0.56738	1.1117	-0.62578	-11.207	30.804	53.115	0.20947	0.20752	-0.029785	-52.378	78.625	35.216	0.071289	0.058594	0.25146	-17.8722	-51.94	1590.173	NaN	NaN	NaN
1.112	-96.613	-259.884	987.434	-0.60332	1.1869	-0.6539	0.147999999999996	59.882	9.289	0.20947	0.24609	-0.046875	-46.592	27.2472	47.097	0.086182	0.058349	0.26025	17.1522	-17.1974	1598.534	NaN	NaN	NaN
1.114	-123.219	-247.936	1001.7579	-0.63525	1.2563	-0.68311	-25.5	7.606	34.3825	0.21314	0.26294	-0.059814	-60.131	27.402	52.4821	0.10205	0.059082	0.26563	25.511	29.457	1572.13	NaN	NaN	NaN
1.116	-123.352	-230.4866	1008.045	-0.67725	1.329	-0.70811	-36.441	43.9771	17.547	0.21143	0.2793	-0.075195	-79.7936	15.9044	35.676	0.13184	0.062012	0.27197	64.539	37.003	1556.972	NaN	NaN	NaN
1.118	-121.928	-207.532	1026.344	-0.721	1.3896	-0.73116	-31.46	14.3159	34.042	0.20801	0.29541	-0.097656	-57.8972	51.1758	22.7945	0.15088	0.061523	0.27197	30.6632	53.093	1502.318	NaN	NaN	NaN
1.12	-135.365	-192.253	1022.048	-0.77099	1.4521	-0.75537	-43.732	8.937	62.064	0.20947	0.29883	-0.10498	-38.313	20.9269	31.261	0.19141	0.063477	0.26807	38.6852	64.44	1469.242	NaN	NaN	NaN
1.122	-138.5186	-177.538	1030.3763	-0.82354	1.5036	-0.78467	-39.557	42.685	11.771	0.20166	0.31348	-0.10791	-56.691	15.7485	60.6376	0.23316	0.060303	0.26782	35.8273	79.522	1415.447	NaN	NaN	NaN
1.124	-153.873	-164.826	1052.4205	-0.8667	1.5474	-0.82764	-55.288	9.402	36.7389	0.19238	0.32422	-0.12696	-67.278	7.9938	47.1763	0.27588	0.054199	0.26855	-6.9643	129.9738	1384.0566	NaN	NaN	NaN
1.126	-116.359	-147.767	1074.7264	-0.88115	1.5946	-0.86592	-52.6091	48.6133	8.783	0.17188	0.34814	-0.14502	-42.2	31.0137	43.78269	0.32422	0.033203	0.25391	-27.827	103.7923	1350.4825	NaN	NaN	NaN
1.128	-119.693	-140.46	1080.2976	-0.87569	1.6325	-0.89327	-77.04167	23.64609	5.903	0.14404	0.3999	-0.19678	-40.654	35.508	30.4433	0.3501	0.022461	0.25732	-22.382	119.961	1352.7563	NaN	NaN	NaN
1.13	-123.683	-120.979	1081.7379	-0.84053	1.6512	-0.9167	-81.0148	13.912	36.139	0.12842	0.40479	-0.19336	-54.941	15.7092	50.759	0.37207	-0.0092773	0.25293	-13.607	118.7597	1316.373	NaN	NaN	NaN
1.132	-101.904	-135.9918	1090.32782	-0.77988	1.6467	-0.93398	-50.17	36.4091	2.882	0.10596	0.45313	-0.21484	-55.728	18.2249	50.346	0.37622	-0.040039	0.24511	-73.614	159.784	1273.701	NaN	NaN	NaN
1.134	-94.163	-136.3873	1090.1121	-0.69287	1.6216	-0.94287	-69.9357	-0.0940000000000012	30.9454	0.088867	0.47143	-0.2334	-36.848	20.4561	40.991	0.37061	-0.0625	0.24951	-34.591	192.509	1246.766	NaN	NaN	NaN
1.136	-107.793	-159.787	1089.3344	-0.59717	1.5649	-0.93721	-59.477	37.28997	24.533	0.069336	0.50049	-0.26123	-15.211	53.924	13.8521	0.35938	-0.10303	0.24854	-45.1186	220.356	1231.6424	NaN	NaN	NaN
1.138	-140.052	-155.9238	1082.7609	-0.51133	1.4922	-0.92695	-66.5186	21.9994	18.935	0.054688	0.51514	-0.28857	-2.503	29.1521	22.7052	0.35059	-0.11719	0.24609	-54.751	231.219	1222.443	NaN	NaN	NaN
1.14	-126.215	-162.6909	1086.315	-0.44688	1.4184	-0.90859	-69.9342	29.0013	52.3924	0.038574	0.53662	-0.32422	-38.031	30.6238	14.2544	0.32715	-0.13623	0.23779	-65.713	198.299	1198.5734	NaN	NaN	NaN
1.142	-128.532	-165.0697	1063.9481	-0.41455	1.3585	-0.87744	-42.588	35.081	58.477	-0.0063477	0.55713	-0.39648	-49.77	7.379	11.4941	0.30103	-0.14355	0.2268	-45.878	147.516	1187.253	NaN	NaN	NaN
1.144	-154.6399	-170.8537	1043.096	-0.41016	1.3105	-0.85938	-59.696	-5.26298	114.5813	-0.062989	0.55737	-0.45166	-26.979	42.7133	-9.28615	0.28369	-0.14795	0.22412	-39.021	109.938	1125.1403	NaN	NaN	NaN
1.146	-155.0049	-172.0622	1018.4552	-0.4125	1.283	-0.83301	-38.989	40.848	139.7928	-0.13086	0.53906	-0.49805	5.941	34.354	12.612	0.26563	-0.12305	0.20557	-21.96	152.531	1091.539	NaN	NaN	NaN
1.148	-131.4903	-160.9323	1003.09252	-0.41377	1.2688	-0.80615	-46.794	36.58	212.634	-0.27051	0.51025	-0.57861	-19.287	48.2446	23.862	0.25586	-0.11523	0.19531	-53.363	178.398	1036.533	NaN	NaN	NaN
1.15	-120.039	-154.114	977.685	-0.41416	1.2611	-0.7749	-61.724	55.5226	325.894	-0.36572	0.48877	-0.62354	-37.512	25.275	36.6718	0.23096	-0.087891	0.17383	-91.0585	204.723	1017.816	NaN	NaN	NaN
1.152	-131.531	-124.326	942.999	-0.40771	1.2553	-0.75889	-71.597	66.954	441.389	-0.59326	0.46729	-0.70459	-47.755	71.192	15.1967	0.20752	-0.061035	0.15674	-66.599	170.632	939.31866	NaN	NaN	NaN
1.154	-131.543	-100.256	940.683	-0.39063	1.248	-0.73535	-64.071	37.592	636.03	-0.80347	0.48413	-0.78052	-51.6533	43.9896	5.821	0.19678	-0.040039	0.15381	-80.512	172.854	863.656	NaN	NaN	NaN
1.156	-108.724	-74.1382	928.9032	-0.36621	1.2365	-0.71757	-32.408	73.419	787.921	-1.041	0.53467	-0.86035	-46.232	61.779	36.043	0.16504	-0.015625	0.14209	-63.974	195.8005	817.452	NaN	NaN	NaN
1.158	-105.522	-53.648	919.8772	-0.34366	1.2235	-0.69834	-23.782	39.93	953.673	-1.3711	0.6416	-0.98047	-56.058	10.632	46.39	0.1394	0.0036621	0.1394	-62.556	252.084	807.4652	NaN	NaN	NaN
1.16	-129.283	-46.923	897.9879	-0.31709	1.2063	-0.68194	-39.724	57.426	1107.0799	-1.5444	0.73389	-1.0386	-47.149	49.5825	39.5439	0.11865	0.022461	0.1377	-62.604	292.958	814.469	NaN	NaN	NaN
1.162	-110.93	-58.161	896.4818	-0.2956	1.1915	-0.66553	-60.306	96.685	1179.55	-1.8179	1.0122	-1.1226	-45.333	42.4074	16.922	0.084961	0.050293	0.12988	-121.456	284.374	748.7733	NaN	NaN	NaN
1.164	-119.847	-62.265	867.1646	-0.28223	1.1777	-0.64844	-104.688	66.4	1284.866	-1.9434	1.2705	-1.2046	-68.7474	80.3545	4.798	0.073242	0.060059	0.12988	-64.453	262.628	675.156	NaN	NaN	NaN
1.166	-133.866	-62.823	822.1227	-0.2707	1.1527	-0.62969	-99.193	95.099	1320.5449	-1.9683	1.5181	-1.2866	-70.4389	30.924	25.449	0.055176	0.075684	0.12549	-53.342	235.232	643.053	NaN	NaN	NaN
1.168	-139.411	-74.6167	817.396	-0.27109	1.1313	-0.60976	-86.027	33.748	1342.088	-1.7944	1.7427	-1.3472	-72.396	54.8842	19.593	0.045654	0.088867	0.11377	-53.485	270.3221	619.3958	NaN	NaN	NaN
1.17	-134.465	-75.9083	800.82	-0.26914	1.0988	-0.59375	-92.912	-10.5227	1355.46	-1.5271	1.7981	-1.3377	-57.53	36.90961	44.0767	0.039551	0.095703	0.11084	-48.294	288.051	586.708	NaN	NaN	NaN
1.172	-115.07	-72.8895	782.07	-0.26318	1.0628	-0.57685	-107.4087	-22.7937	1281.188	-1.207	1.793	-1.29	-38.496	86.57	31.1092	0.036621	0.10693	0.10449	-62.697	281.408	549.8047	NaN	NaN	NaN
1.174	-113.102	-62.352	760.429	-0.25293	1.0254	-0.55908	-111.464	-79.592	1300.088	-0.81445	1.6699	-1.1689	-37.652	46.09	71.7063	0.03125	0.11426	0.09668	-94.426	231.8105	467.596	NaN	NaN	NaN
1.176	-84.899	-59.526	764.028	-0.23848	0.98848	-0.53789	-93.6466	-17.294	1266.06	-0.69238	1.584	-1.1182	-67.128	53.375	72.4039	0.024902	0.12988	0.081543	-60.0579	179.71	442.868	NaN	NaN	NaN
1.178	-85.719	-52.955	774.187	-0.21562	0.95195	-0.52774	-80.353	-68.243	1252.324	-0.59277	1.3867	-1.0234	-79.0791	16.3374	51.7323	0.022217	0.1438	0.072265	-18.896	170.257	410.258	NaN	NaN	NaN
1.18	-86.748	-43.6222	758.564	-0.19453	0.91289	-0.51211	-85.0828	-90.589	1252.122	-0.62598	1.2368	-0.98535	-63.849	42.12761	40.15427	0.016602	0.16455	0.062988	-75.656	180.262	414.7929	NaN	NaN	NaN
1.182	-98.849	-25.6182	716.566	-0.1709	0.8791	-0.50234	-74.5218	-114.861	1230.558	-0.7085	1.1177	-0.96045	-44.0101	9.1129	47.6909	0.0053711	0.18359	0.049316	-58.189	219.368	398.1288	NaN	NaN	NaN
1.184	-106.072	-8.1379	682.9911	-0.15039	0.84766	-0.49658	-76.7608	-189.173	1303.507	-0.87842	1.0317	-0.93799	-23.959	25.7947	54.137	-0.0024414	0.19238	0.038574	-108.299	199.475	384.135	NaN	NaN	NaN
1.186	-106.539	-9.799	678.7232	-0.12979	0.81318	-0.49013	-73.9209	-124.334	1329.6007	-0.96436	1.022	-0.94092	-28.282	-1.9676	48.608	-0.016602	0.21875	0.0053711	-72.8397	195.287	347.8539	NaN	NaN	NaN
1.188	-99.649	-1.411	654.0381	-0.10508	0.78564	-0.47979	-93.2859	-151.993	1386.546	-1.1309	1.0645	-0.98438	-38.267	27.4247	17.614043	-0.022949	0.23462	-0.0097657	-55.141	163.612	308.88396	NaN	NaN	NaN
1.19	-129.717	-9.828	625.2626	-0.088281	0.75635	-0.47236	-108.76	-148.949	1420.263	-1.2173	1.1275	-1.0332	-32.451	12.7595	19.6978	-0.023438	0.25	-0.023438	-22.744	179.2084	285.27392	NaN	NaN	NaN
1.192	-125.665	2.62	605.82795	-0.072266	0.72852	-0.46582	-66.465	-146.832	1356.769	-1.2827	1.1958	-1.0835	-12.413	34.42448	16.0227	-0.03418	0.28174	-0.057617	-47.171	165.095	259.0613	NaN	NaN	NaN
1.194	-114.02	0.122	581.9895	-0.063477	0.69971	-0.45801	-82.2161	-263.76	1366.819	-1.3501	1.2739	-1.1519	-21.48	1.36485	54.421	-0.029785	0.29346	-0.075195	-43.079	172.1722	265.57	NaN	NaN	NaN
1.196	-110.508	4.4083	560.7499	-0.049414	0.66914	-0.45195	-53.404	-259.368	1383.79	-1.3784	1.3032	-1.1909	-18.228	33.8381	36.11158	-0.025391	0.32373	-0.10645	-62.537	153.072	215.7084	NaN	NaN	NaN
1.198	-117.486	-3.34237	528.4646	-0.037305	0.63886	-0.43965	-34.592	-325.218	1434.08457	-1.4214	1.3521	-1.2847	-38.4302	33.632	47.058	-0.025147	0.34643	-0.14258	-78.2249	111.651	179.1427	NaN	NaN	NaN
1.2	-94.532	-5.0865	510.2631	-0.029492	0.6166	-0.43184	-55.713	-341.717	1481.204	-1.4383	1.3792	-1.3391	-30.678	46.0386	29.87447	-0.016602	0.36523	-0.17529	-25.435	101.363	152.3018	NaN	NaN	NaN
1.202	-76.947	5.205	497.4907	-0.02168	0.58457	-0.41621	22.606	-304.914	1420.194	-1.4414	1.3945	-1.3828	-33.571	26.8496	25.33403	-0.0083008	0.38379	-0.21631	-60.016	76.3641	149.3189	NaN	NaN	NaN
1.204	-79.269	11.1409	486.45587	-0.012207	0.55664	-0.4082	67.5486	-362.692	1468.204	-1.4492	1.4102	-1.4121	-50.998	29.31	1.198	-0.00097656	0.39551	-0.24023	-49.22	115.422	135.6344	NaN	NaN	NaN
1.206	-108.308	11.888	464.6632	-0.011523	0.52979	-0.39404	66.9191	-269.276	1494.501	-1.4507	1.4165	-1.4175	-53.396	35.93	-6.93241	0.015625	0.41553	-0.26904	-82.7803	124.262	107.1954	NaN	NaN	NaN
1.208	-95.202	18.9665	453.8733	-0.0030274	0.50107	-0.38408	43.516	-249.335	1564.282	-1.4956	1.4399	-1.4272	-20.635	55.1811	-5.0562	0.022461	0.44605	-0.2998	-52.78	114.778	79.434	NaN	NaN	NaN
1.21	-100.618	35.3381	433.5868	0.0016602	0.47412	-0.37354	-8.199	-199.4659	1653.098	-1.5434	1.4731	-1.4444	-21.536	48.324	11.6375	0.032227	0.47363	-0.32422	-58.52	71.9544	78.8485	NaN	NaN	NaN
1.212	-98.369	48.8962	405.857	0.0070313	0.45156	-0.35801	-31.005	-113.562	1670.72059	-1.6191	1.5176	-1.4707	-41.666	27.077	21.3776	0.054688	0.51855	-0.35205	-29.402	52.408	100.1	NaN	NaN	NaN
1.214	-118.7035	41.638	415.595	0.010254	0.41992	-0.34766	-37.183	-148.925	1744.402	-1.7144	1.5903	-1.5239	-60.652	26.088	19.8107	0.05957	0.54004	-0.36719	-36.659	55.269	97.444	NaN	NaN	NaN
1.216	-108.575	33.302	392.3381	0.012305	0.40752	-0.33448	-29.689	-65.576	1716.6787	-1.7515	1.6235	-1.5522	-64.12	15.342	36.56878	0.080078	0.57422	-0.39209	-35.427	53.865	65.234	NaN	NaN	NaN
1.218	-95.942	32.065	378.0635	0.010058	0.38555	-0.32432	-38.079	-55.929	1673.181	-1.8145	1.7012	-1.5957	-67.1983	32.93116	76.7972	0.081787	0.6128	-0.43408	-46.808	63.57157	13.459	NaN	NaN	NaN
1.22	-81.802	40.6534	344.3808	0.012012	0.36523	-0.31299	-73.101	-46.34	1684.348	-1.8391	1.7581	-1.6199	-54.621	27.5386	124.772	0.072754	0.64453	-0.45898	-64.1633	63.22024	26.3152	NaN	NaN	NaN
1.222	-96.623	26.1772	334.3781	0.0081055	0.34326	-0.30157	-58.201	-19.918	1671.087	-1.8457	1.7988	-1.6504	-67.376	38.84	153.441	0.023438	0.64746	-0.49609	-33.96	70.0643	2.91	NaN	NaN	NaN
1.224	-63.406	44.1076	326.416	0.0043945	0.32471	-0.29248	-91.049891	-112.2657	1736.5267	-1.8179	1.8442	-1.6616	-77.966	38.0415	228.563	-0.021484	0.64063	-0.52539	-46.946	48.5945	3.513	NaN	NaN	NaN
1.226	-59.738	39.52997	300.57	0.00039062	0.30703	-0.28213	-62.2187	-83.504	1742.1826	-1.793	1.8574	-1.6621	-113.3238	56.11	338.835	-0.1416	0.61816	-0.60254	-41.737	47.9397	-15.5013	NaN	NaN	NaN
1.228	-72.333	62.8098	285.314	-0.0014648	0.28711	-0.27305	-25.619	-121.766	1766.004	-1.7065	1.8638	-1.6577	-117.958	32.55599	525.471	-0.27539	0.58179	-0.6604	-77.3852	37.524	-9.854	NaN	NaN	NaN
1.23	-76.682	54.9288	313.95587	-0.0069336	0.27578	-0.26446	-67.485	-120.914	1811.806	-1.627	1.8594	-1.6338	-134.808	39.542	734.823	-0.45313	0.54883	-0.72168	-42.464	55.306	17.682	NaN	NaN	NaN
1.232	-82.205	58.475	328.838	-0.0050781	0.26406	-0.25791	-90.1696	-58.62	1778.11373	-1.541	1.8379	-1.6035	-101.261	-8.281	963.776	-0.75439	0.5083	-0.78271	-60.734	60.967	28.1154	NaN	NaN	NaN
1.234	-78.14	43.663	317.197	-0.0053711	0.25195	-0.25293	-142.742	-80.088	1798.724	-1.4316	1.7832	-1.5527	-118.403	26.6323	1168.393	-0.95313	0.49512	-0.81836	-36.599	86.267	46.8994	NaN	NaN	NaN
1.236	-101.612	53.8983	290.0417	-0.006836	0.24297	-0.24258	-149.403	-0.794999999999998	1753.205	-1.3828	1.7539	-1.5195	-97.31	1.425	1375.762	-1.3892	0.50635	-0.87354	-55.67	64.632	46.0469	NaN	NaN	NaN
1.238	-88.528	48.2008	286.1484	-0.0090821	0.23213	-0.23731	-122.92	-20.882	1732.443	-1.3052	1.6821	-1.4487	-139.336	13.001	1502.584	-1.738	0.56177	-0.90552	-18.425	44.7059	46.414	NaN	NaN	NaN
1.24	-84.08	57.247	282.4177	-0.01416	0.22431	-0.22793	-111.78649	-27.132	1758.668	-1.2715	1.6269	-1.4033	-189.4386	-48.944	1590.2489	-2.0776	0.65869	-0.92334	-56.944	49.5718	17.9173	NaN	NaN	NaN
1.242	-71.916	53.3036	254.5485	-0.017578	0.21855	-0.22158	-101.0237	5.768	1684.726	-1.2495	1.5903	-1.3628	-172.109	-67.421	1591.842	-2.4976	0.88721	-0.88037	-46.9834	53.231	38.054	NaN	NaN	NaN
1.244	-83.896	44.6405	244.2396	-0.027344	0.20898	-0.21582	-95.5612	-43.1553	1666.8922	-1.2261	1.5474	-1.3354	-149.683	-151.928	1574.68	-2.6914	1.0283	-0.89648	-24.825	70.281	44.9511	NaN	NaN	NaN
1.246	-75.679	36.714	240.349	-0.021289	0.20976	-0.21445	-70.329	27.1917	1596.385	-1.2109	1.5293	-1.3203	-118.611	-144.2705	1531.6	-2.918	1.4004	-1.0039	-63.486	22.1887	60.7472	NaN	NaN	NaN
1.248	-57.951	44.3208	233.1835	-0.021973	0.20674	-0.20557	-66.739	3.01	1536.865	-1.1621	1.4922	-1.2969	-114.7792	-200.613	1526.59	-2.908	1.6731	-1.1141	-48.616	21.1742	46.2918	NaN	NaN	NaN
1.25	-75.646	42.2499	240.1693	-0.020019	0.20088	-0.20947	-53.707	16.327	1545.992	-1.1231	1.4668	-1.2769	-131.587	-185.485	1495.258	-2.7085	1.8794	-1.2202	-62.7632	1.3021	25.3897	NaN	NaN	NaN
1.252	-96.857	58.6408	229.769	-0.018067	0.19463	-0.20918	-19.672	66.762	1505.718	-1.0815	1.4419	-1.2544	-121.765	-253.97	1474.305	-2.1362	1.9653	-1.2417	-16.083	24.4034	41.3964	NaN	NaN	NaN
1.254	-91.721	58.5808	235.4227	-0.01123	0.19336	-0.2085	-25.909	28.126	1514.6123	-1.0488	1.3984	-1.2305	-60.47	-274.45	1400.075	-1.8198	1.9263	-1.2124	-74.7693	24.5124	67.741	NaN	NaN	NaN
1.256	-74.958	64.8632	235.24871	-0.0041016	0.18682	-0.20576	-1.697	101.295	1468.299	-1.0356	1.3735	-1.2183	4.2	-348.73	1410.212	-1.3315	1.7114	-1.1304	-41.029	39.5937	87.11	NaN	NaN	NaN
1.258	-97.8564	63.8516	208.966	-0.00029297	0.18066	-0.20537	1.34	52.985	1447.833	-1.019	1.3325	-1.189	-3.681	-312.129	1443.745	-1.196	1.4846	-1.0784	-68.368	25.363	51.2062	NaN	NaN	NaN
1.26	-99.094	64.2482	214.2071	0.0012695	0.17286	-0.20225	-22.514	43.99728	1449.697	-1.0034	1.2969	-1.168	-54.574	-257.642	1509.84238	-1.2202	1.2622	-1.0464	-25.036	31.8404	31.7419	NaN	NaN	NaN
1.262	-79.416	64.2939	213.2913	-0.00048828	0.16504	-0.20235	-10.166	69.211	1389.2239	-0.98584	1.2642	-1.1489	-127.19441	-178.81	1527.55397	-1.4395	1.0313	-1.0273	-33.865	20.8011	0.548000000000002	NaN	NaN	NaN
1.264	-77.748	88.292	202.4061	-0.0029297	0.15674	-0.19434	11.887	26.0755	1410.582	-0.96826	1.2212	-1.1226	-115.3729	-157.12	1529.1506	-1.5835	0.95557	-1.0229	-52.832	16.503	37.474	NaN	NaN	NaN
1.266	-66.253	78.284	206.462	-0.012696	0.15283	-0.1957	2.00700000000001	106.091	1364.32098	-0.95654	1.1978	-1.1069	-67.82	-209.11	1508.4695	-1.8452	0.83447	-1.0356	-23.726	33.3812	35.3488	NaN	NaN	NaN
1.268	-89.759	69.9031	221.9621	-0.021387	0.15283	-0.19424	13	73.8788	1338.0196	-0.93359	1.1543	-1.0742	-61.6897	-246.735	1555.174	-2.0069	0.78906	-1.0567	-45.34	28.19683	16.7601	NaN	NaN	NaN
1.27	-59.747	59.3741	224.2819	-0.026855	0.14854	-0.19424	15.229	85.135	1322.63	-0.90796	1.1204	-1.0456	-56.915	-308.6069	1603.758	-2.125	0.77344	-1.1035	-47.367	35.8727	-5.604	NaN	NaN	NaN
1.272	-62.029	53.2342	220.1221	-0.034473	0.14707	-0.19248	-11.767	115.669	1236.352	-0.87695	1.0947	-1.0313	-70.1221	-323.969	1623.483	-2.2109	0.84375	-1.1787	-58.1154	15.2525	-0.4884	NaN	NaN	NaN
1.274	-54.56	53.0144	219.7788	-0.034668	0.15332	-0.18994	-33.79	79.553	1234.222	-0.8335	1.0591	-0.99756	-47.683	-383.197	1659.97392	-2.23	0.90674	-1.2222	-23.699	25.7216	7.075908	NaN	NaN	NaN
1.276	-86.388	52.4298	232.327	-0.037012	0.15673	-0.19395	-25.924	162.087	1186.602	-0.81396	1.0415	-0.98584	-19.325	-396.089	1657.4768	-2.2515	1.0298	-1.312	-77.431	35.6319	13.8765	NaN	NaN	NaN
1.278	-59.267	66.7348	212.324	-0.035742	0.15947	-0.19727	-5.265	159.2546	1152.217	-0.76807	0.99951	-0.94482	46.315	-417.53	1705.6569	-2.2593	1.1167	-1.354	-40.542	60.9792	18.2223	NaN	NaN	NaN
1.28	-57.456	61.6087	206.692	-0.036914	0.16338	-0.20156	-39.287	191.765	1122.92	-0.74023	0.9624	-0.91894	71.264	-357.489	1740.456	-2.2808	1.1899	-1.3784	-61.6858	48.449	-4.089	NaN	NaN	NaN
1.282	-76.069	65.5738	218.2968	-0.032324	0.16953	-0.20146	-34.16354	231.164	1070.462	-0.70996	0.92529	-0.88721	41.621	-354.322	1830.297	-2.3359	1.252	-1.3945	-40.182	52.7049	27.4674	NaN	NaN	NaN
1.284	-60.605	65.719	251.2983	-0.026367	0.17725	-0.20459	-89.23	187.42	1067.744	-0.67334	0.87158	-0.84326	-48.552	-272.344	1913.5196	-2.373	1.2793	-1.4004	-45.957	57.184	6.051	NaN	NaN	NaN
1.286	-63.11	59.872	270.491	-0.019922	0.17793	-0.20644	-70.957	217.679	1023.4739	-0.66357	0.84619	-0.81787	-101.2524	-260.769	1982.802	-2.4351	1.313	-1.396	-25.128	57.465108	25.6345	NaN	NaN	NaN
1.288	-48.468	59.1244	247.0018	-0.019238	0.18242	-0.20918	-65.8547	190.11708	975.987	-0.62842	0.79736	-0.77881	-127.007	-150.438	1946.296	-2.4639	1.3164	-1.3936	-32.845	81.543	26.2758	NaN	NaN	NaN
1.29	-69.85	60.8344	246.831352	-0.017285	0.18242	-0.21035	-67.5578	203.55	935.845	-0.60595	0.75879	-0.75293	-111.3895	-112.045	1905.009	-2.4819	1.3306	-1.396	-59.676	49.3905	28.35022	NaN	NaN	NaN
1.292	-55.772	63.9556	246.7311	-0.016992	0.18516	-0.21553	-47.659	228.74	866.644	-0.58203	0.72363	-0.72266	-121.297	-15.18	1863.284	-2.4961	1.3633	-1.4082	-47.908	61.8467	30.05765	NaN	NaN	NaN
1.294	-53.417	63.9024	245.0445	-0.019531	0.18652	-0.21973	-63.2221	188.7669	864.424	-0.55078	0.68457	-0.69141	-99.284	-50.189	1843.964	-2.5	1.4141	-1.4199	-70.5576	44.7708	26.65257	NaN	NaN	NaN
1.296	-62.744	58.91338	233.715	-0.025488	0.18662	-0.21553	-67.17648	212.1686	811.5808	-0.53076	0.65967	-0.67432	-93.994	6.378	1852.886	-2.543	1.4746	-1.4824	-22.607	73.374	43.2879	NaN	NaN	NaN
1.298	-61.163	57.1808	243.139	-0.027246	0.19033	-0.21719	-52.6641	185.21	772.2746	-0.48975	0.625	-0.64258	-70.696	-57.221	1871.498	-2.5801	1.5371	-1.5176	-56.317	40.289	50.4435	NaN	NaN	NaN
1.3	-63.465	49.36661	265.1423	-0.031934	0.19268	-0.21953	-36.6991	193.96	759.881	-0.46435	0.59912	-0.62012	-45.238	-31.757	1892.681	-2.5898	1.5801	-1.5117	-38.477	55.062	65.4178	NaN	NaN	NaN
1.302	-52.805	61.1606	293.5619	-0.038379	0.19824	-0.22305	-15.835	202.814	705.982	-0.4292	0.56787	-0.5874	-58.931	-122.177	1921.19	-2.5581	1.6235	-1.4995	-84.5792	30.6986	42.5161	NaN	NaN	NaN
1.304	-73.41	55.8091	296.2388	-0.048828	0.20361	-0.22705	4.244	178.935	706.9665	-0.39014	0.52832	-0.55811	-90.371	-85.653	1918.948	-2.4795	1.622	-1.4765	-29.509	36.041	53.217	NaN	NaN	NaN
1.306	-80.591	66.8818	304.323	-0.052148	0.21162	-0.23076	-1.428	224.217	650.903	-0.375	0.50732	-0.54492	-116.068	-123.137	1904.594	-2.3652	1.5859	-1.4473	-38.632	31.55732	54.815	NaN	NaN	NaN
1.308	-64.274	68.26	299.9169	-0.060937	0.22148	-0.2375	-8.45	220.543	602.064	-0.33203	0.46094	-0.50586	-140.4817	-46.1806	1883.374	-2.1719	1.502	-1.3809	-49.373	6.494	66.852	NaN	NaN	NaN
1.31	-74.888	82.825	299.7561	-0.06914	0.2293	-0.24101	21.066	219.062	573.3917	-0.2998	0.42969	-0.48022	-151.749	-90.06733	1865.02	-2.0854	1.4517	-1.3491	-47.358	21.0179	70.515	NaN	NaN	NaN
1.312	-57.096	70.7443	290.0211	-0.080078	0.2417	-0.24365	21.142	208.9	516.337	-0.27148	0.3999	-0.45898	-192.778	-65.1278	1858.764	-1.9414	1.3477	-1.2832	-47.139	11.063	36.3672	NaN	NaN	NaN
1.314	-77.856	62.0246	296.285	-0.086914	0.25391	-0.24805	-16.379	188.341	520.178	-0.22949	0.3457	-0.42822	-168.867	-128.827	1838.509	-1.866	1.2864	-1.243	-24.806	35.5125	6.604	NaN	NaN	NaN
1.316	-56.664	52.2379	314.05	-0.096192	0.26729	-0.25459	6.71299999999999	197.218	475.826	-0.20654	0.32568	-0.41357	-142.337	-69.5123	1782.291	-1.8164	1.2305	-1.2109	-56.725	23.513	33.7352	NaN	NaN	NaN
1.318	-69.771	67.7251	317.872	-0.10098	0.27803	-0.25781	26.661	175.0566	451.262	-0.16602	0.28271	-0.38525	-83.283	-71.223	1709.534	-1.7637	1.1807	-1.1836	-28.502	33.039	45.1847	NaN	NaN	NaN
1.32	-61.786	66.3745	336.3368	-0.10996	0.28936	-0.26524	5.648	166.973	433.8742	-0.13428	0.25171	-0.36548	-64.718	6.2144	1640.581	-1.7285	1.1572	-1.1719	-73.9791	1.713	40.0797	NaN	NaN	NaN
1.322	-65.89	57.8364	360.1958	-0.12353	0.30381	-0.27178	-0.298999999999999	171.4847	371.7618	-0.10449	0.21631	-0.33252	-70.195	-29.766	1601.4781	-1.6636	1.1274	-1.1548	-19.279	21.0041	21.3174	NaN	NaN	NaN
1.324	-54.795	66.557	374.7117	-0.12646	0.31689	-0.27832	12.324	142.811	365.118	-0.067383	0.18555	-0.32129	-60.814	27.9057	1568.116	-1.6006	1.1064	-1.1367	-51.838	11.727	-2.6175	NaN	NaN	NaN
1.326	-51.082	66.887	379.9946	-0.13721	0.32744	-0.28564	-18.424	177.425	319.4832	-0.03711	0.1543	-0.29712	-66.43	8.488	1519.3654	-1.5425	1.0854	-1.1226	-36.324	16.733	43.4895	NaN	NaN	NaN
1.328	-79.11	62.3891	389.2319	-0.14688	0.33535	-0.29053	-26.153	173.7	318.7918	-0.0029297	0.12207	-0.27344	-37.959	84.37936	1463.9	-1.4819	1.0522	-1.0962	-63.421	6.6604	41.227	NaN	NaN	NaN
1.33	-78.678	62.8655	393.0526	-0.15312	0.34433	-0.29717	-31.422	167.324	337.622	0.031738	0.092285	-0.24609	-42.896	75.1888	1427.086	-1.459	1.0352	-1.0801	-43.362	13.8666	61.243	NaN	NaN	NaN
1.332	-75.944	64.3901	395.3612	-0.15947	0.34893	-0.3083	-43.52	150.052	304.1893	0.051758	0.071777	-0.23584	-61.194	135.589	1408.074	-1.4297	1.0039	-1.0527	-34.054	32.652	56.005	NaN	NaN	NaN
1.334	-61.061	63.9906	401.435	-0.16699	0.35791	-0.31738	-69.0324	107.423	310.698	0.075684	0.046387	-0.22998	-96.1973	118.907	1388.683	-1.4138	0.97583	-1.0241	-45.733	17.8083	116.661	NaN	NaN	NaN
1.336	-70.843	56.4103	433.3513	-0.16914	0.37041	-0.32901	-77.6617	117.9434	274.7727	0.093018	0.031982	-0.2246	-67.932	161.286	1354.886	-1.3989	0.94971	-1.0015	-52.922	34.878	174.8845	NaN	NaN	NaN
1.338	-53.26	57.8717	449.0547	-0.17343	0.37988	-0.34356	-85.2434	112.3	247.2348	0.10645	0.019531	-0.21777	-30.629	121.534	1324.1105	-1.377	0.92188	-0.96387	-105.009	23.0224	261.2077	NaN	NaN	NaN
1.34	-56.695	59.4657	462.9873	-0.17851	0.39277	-0.35801	-98.895	117.379	230.556	0.13818	-0.018066	-0.18213	-30.453	141.3376	1302.518	-1.3628	0.90479	-0.95264	-50.605	62.635	356.935	NaN	NaN	NaN
1.342	-68.102	64.163019	470.201	-0.18291	0.40586	-0.36992	-69.043	125.3546	168.217	0.13672	-0.021484	-0.18848	-27.79	135.5424	1279.294	-1.3125	0.87109	-0.91016	-84.6599	42.954	494.529	NaN	NaN	NaN
1.344	-71.549	71.4744	493.319	-0.19238	0.42285	-0.37549	-83.5905	103.657	155.037764	0.1377	-0.029297	-0.19385	-22.427	200.9998	1221.3033	-1.2595	0.84986	-0.88648	-53.399	63.3874	666.105	NaN	NaN	NaN
1.346	-64.205	71.1443	499.1867	-0.19922	0.43819	-0.38955	-78.1817	94.6824	141.3909	0.14233	-0.032959	-0.18408	-38.972	199.662	1194.028	-1.1987	0.82471	-0.85889	-64.5259	56.9509	815.89	NaN	NaN	NaN
1.348	-72.683	79.441	497.9706	-0.20479	0.45811	-0.39951	-82.9551	70.395	136.055	0.14453	-0.032227	-0.1792	-40.674	201.976	1152.745	-1.1167	0.79053	-0.82471	-1.118	92.6866	978.185	NaN	NaN	NaN
1.35	-93.978	82.2798	508.111	-0.21455	0.48154	-0.40928	-93.8369	62.459	144.0663	0.13867	-0.02832	-0.18018	-45.234	162.115	1131.897	-1.0698	0.76807	-0.80811	-77.37842	106.424	1114.744	NaN	NaN	NaN
1.352	-91.127	77.66	537.509	-0.22461	0.5041	-0.41973	-59.084	88.3057	96.645	0.13037	-0.026855	-0.18848	-36.518	186.241	1072.105	-0.97852	0.72949	-0.76758	-68.241	98.316	1278.4689	NaN	NaN	NaN
1.354	-80.887	80.6394	540.7832	-0.2251	0.52051	-0.43311	-64.0599	76.643	102.89058	0.12305	-0.016602	-0.17969	-56.8066	215.766	1014.034	-0.92993	0.68579	-0.74438	-71.719	81.651	1371.3954	NaN	NaN	NaN
1.356	-102.2891	101.3534	554.609	-0.23447	0.5419	-0.43916	-57.513	95.95	79.6838	0.11353	-0.0043945	-0.17578	-71.4458	263.569	975.738	-0.87061	0.65283	-0.69482	-106.347	28.8171	1417.024	NaN	NaN	NaN
1.358	-93.147	95.4201	563.4382	-0.23701	0.55674	-0.45381	-60.809	89.387	60.6626	0.1084	0.0014648	-0.16992	-87.398	270.072	924.644	-0.83789	0.59375	-0.6875	-83.28	13.532	1410.554	NaN	NaN	NaN
1.36	-101.743	85.32512	583.8494	-0.23818	0.56963	-0.4628	-59.219	79.4025	52.6029	0.098145	0.013672	-0.16797	-98.6066	283.74	870.0309	-0.79834	0.56201	-0.66553	-103.141	-56.5814	1432.098	NaN	NaN	NaN
1.362	-77.132	86.3954	600.924	-0.24219	0.58476	-0.47207	-29.755	88.221	29.332	0.09375	0.020508	-0.16748	-78.7987	266.116	809.0191	-0.71289	0.5166	-0.6084	-107.0789	-93.673	1368.568	NaN	NaN	NaN
1.364	-106.884	95.6704	609.4715	-0.24463	0.59766	-0.48486	-24.25	45.898	51.5051	0.09375	0.023438	-0.15869	-52.379	262.6071	753.256	-0.66699	0.47998	-0.58105	-147.091	-167.535	1330.809	NaN	NaN	NaN
1.366	-75.5	82.6767	613.2125	-0.25205	0.61025	-0.49756	-7.933	40.7332	33.699	0.098145	0.024903	-0.15235	-62.345	243.65087	728.448	-0.61182	0.44287	-0.55322	-63.1098	-145.449	1286.139	NaN	NaN	NaN
1.368	-88.816	70.5268	636.866	-0.26367	0.62539	-0.50029	7.735	26.401	14.779	0.099609	0.028809	-0.14307	-45.658	258.967	697.482	-0.53906	0.40039	-0.51953	-66.6263	-187.105	1273.994	NaN	NaN	NaN
1.37	-99.722	78.9316	645.8145	-0.27735	0.64726	-0.50576	-4.476	15.048	21.595	0.10254	0.029297	-0.14014	-67.7404	261.444	646.5777	-0.5	0.37891	-0.50977	-30.696	-192.915	1335.3137	NaN	NaN	NaN
1.372	-114.676	85.0248	650.339	-0.29141	0.66592	-0.50986	21.766	47.026	11.314	0.1001	0.023926	-0.13135	-30.712	256.4193	593.797	-0.43408	0.32959	-0.47803	-90.307	-244.247	1313.686	NaN	NaN	NaN
1.374	-117.651	96.879	659.401	-0.3125	0.69336	-0.51758	-12.896	42.456	41.926	0.10986	0.01416	-0.11572	-19.887	210.5712	533.805	-0.38745	0.29175	-0.45386	-62.539	-266.3679	1323.536	NaN	NaN	NaN
1.376	-92.872	104.3847	679.5699	-0.32988	0.71426	-0.52256	-3.63999999999999	62.065	26.5651	0.11036	0.0090332	-0.10766	-59.869	159.726	489.3569	-0.34082	0.25684	-0.43359	-58.787	-269.652	1361.885	NaN	NaN	NaN
1.378	-116.952	113.112	683.6288	-0.34317	0.74062	-0.5291	-17.908	50.285	18.302	0.11084	0.003418	-0.10645	-60.821	148.1181	461.38312	-0.2915	0.20313	-0.40283	-76.585	-238.226	1430.184	NaN	NaN	NaN
1.38	-99.187	113.694	687.8393	-0.35215	0.76133	-0.53183	-40.601	34.2393	42.4188	0.12354	0.0014648	-0.088867	-56.298	161.7165	440.178	-0.26953	0.17773	-0.37988	-107.963	-219.01	1450.2647	NaN	NaN	NaN
1.382	-93.637	104.6366	708.0209	-0.3584	0.78564	-0.53427	-21.36	43.607	30.51	0.13428	-0.0063477	-0.076172	-19.507	186.843	403.584	-0.21631	0.12354	-0.35254	-116.073	-221.337	1465.4019	NaN	NaN	NaN
1.384	-80.163	115.1787	717.1834	-0.36475	0.80908	-0.54004	-46.184	34.4325	56.153	0.14941	-0.014648	-0.055664	-21.178	164.9801	350.781	-0.18628	0.082519	-0.33325	-94.787	-245.487	1442.568	NaN	NaN	NaN
1.386	-84.328	120.3903	716.3148	-0.36933	0.82129	-0.54004	-33.125	50.705	27.8691	0.15674	-0.017578	-0.052002	-46.154	141.9449	281.426	-0.15869	0.044434	-0.31787	-92.523	-297.4539	1474.923	NaN	NaN	NaN
1.388	-94.735	119.58574	725.2764	-0.37461	0.83711	-0.53828	-37.524	49.553	13.143	0.1626	-0.026367	-0.046875	-37.478	139.826	261.2533	-0.11523	-0.01123	-0.29688	-43.323	-313.051	1539.781	NaN	NaN	NaN
1.39	-91.639	117.2733	738.3824	-0.3836	0.84141	-0.53985	-52.0596	38.9352	35.171	0.17188	-0.045898	-0.027344	-13.2	173.419	233.816	-0.090332	-0.040039	-0.28369	-56.561	-349.577	1570.181	NaN	NaN	NaN
1.392	-101.926	138.141	729.1616	-0.39345	0.85029	-0.53975	-69.993	55.658	-2.252	0.17725	-0.055176	-0.015625	11.045	186.0334	248.88	-0.041016	-0.097168	-0.25928	1.377	-330.747	1605.6228	NaN	NaN	NaN
1.394	-84.106	148.052	738.9636	-0.40332	0.85889	-0.5415	-81.6954	38.421	21.6723	0.17627	-0.083008	-0.0092773	-11.255	179.152	229.3321	-0.014649	-0.13648	-0.25659	3.88	-331.854	1640.269	NaN	NaN	NaN
1.396	-114.395	147.416	748.6829	-0.41035	0.86006	-0.5542	-62.926	50.2141	19.3694	0.16455	-0.10303	-0.00073241	-11.64	144.23	205.398	0.0073242	-0.16455	-0.25	14.302	-270.956	1685.9816	NaN	NaN	NaN
1.398	-93.995	137.4647	774.642	-0.4211	0.86406	-0.56328	-77.7748	45.773	23.918	0.15283	-0.11914	0.00048828	-43.069	154.8779	133.425	0.025391	-0.21484	-0.22949	-24.572	-216.147	1729.643	NaN	NaN	NaN
1.4	-99.093	146.61417	760.1021	-0.43243	0.87227	-0.57305	-94.044	30.1288	58.759	0.14014	-0.12891	0.00097656	-53.89	151.042	119.984	0.032227	-0.24121	-0.22119	-19.556	-148.871	1794.4069	NaN	NaN	NaN
1.402	-108.087	148.0957	744.061	-0.44179	0.87929	-0.58515	-66.61646	39.517	39.671	0.13721	-0.13135	0.0014648	-60.387	156.341	94.125	0.036133	-0.27441	-0.20264	-70.573	-95.742	1834.9496	NaN	NaN	NaN
1.404	-77.787	144.826	760.017	-0.45459	0.89502	-0.60107	-81.2495	33.5392	61.497	0.12988	-0.12891	-0.0048828	-80.892	118.396	134.4438	0.039307	-0.29614	-0.19336	-120.448	-43.085	1908.015	NaN	NaN	NaN
1.406	-91.405	154.4479	785.25882	-0.46963	0.90732	-0.61533	-54.099	37.568	38.2134	0.14038	-0.13452	0.0063477	-91.1333	118.412	114.9862	0.033203	-0.31201	-0.18359	-89.1186	-27.509	1885.437	NaN	NaN	NaN
1.408	-85.768	156.6187	776.4792	-0.47783	0.925	-0.6332	-66.8608	28.97875	29.2909	0.1416	-0.12402	0.0029297	-83.7822	97.15	106.6945	0.017578	-0.31592	-0.16846	-101.7332	-46.064	1838.758	NaN	NaN	NaN
1.41	-114.605	171.186	760.8162	-0.48877	0.94336	-0.64297	-67.597	26.4589	42.827	0.15283	-0.11963	0.0068359	-59.968	95.5976	70.2373	0.0063477	-0.30908	-0.17285	-80.316	-52.821	1815.514	NaN	NaN	NaN
1.412	-81.032	176.376	777.9153	-0.49912	0.9585	-0.65889	-21.436	37.1019	3.585	0.15869	-0.11328	0.0029297	-94.1129	47.165	95.635	-0.012695	-0.28076	-0.17236	-98.5784	-75.238	1807.716	NaN	NaN	NaN
1.414	-106.852	165.403	799.74271	-0.51172	0.97266	-0.67676	-7.567	25.088	23.7201	0.14941	-0.092773	-0.0063477	-104.953	72.572	75.232	-0.025635	-0.25512	-0.17383	-62.417	-70.988	1854.74	NaN	NaN	NaN
1.416	-102.098	172.7776	805.1689	-0.51592	0.98702	-0.69385	6.127	28.68172	16.728	0.14868	-0.084961	-0.0036621	-88.241	83.8032	79.227	-0.034668	-0.22852	-0.17676	-85.99347	-104.944	1841.0316	NaN	NaN	NaN
1.418	-111.573	165.3726	786.28533	-0.52226	0.99784	-0.71114	-15.15	33.1954	24.2575	0.14844	-0.077637	0.0019531	-53.758	116.143	43.165	-0.038086	-0.18359	-0.17822	-60.023	-112.093	1845.1906	NaN	NaN	NaN
1.42	-108.226	179.172	765.2371	-0.52656	1.0037	-0.7209	-15.317	21.4284	58.958	0.14355	-0.064453	0.0019531	-64.2635	62.593	64	-0.047363	-0.16113	-0.17725	-88.305	-121.42	1830.742	NaN	NaN	NaN
1.422	-95.135	178.4348	783.6134	-0.52744	1.0136	-0.73681	-8.55	38.177	21.6103	0.14502	-0.063477	0.0087891	-73.44	29.868	31.541	-0.048828	-0.10303	-0.1875	-90.301	-87.686	1854.646	NaN	NaN	NaN
1.424	-105.675	190.196	778.3205	-0.53076	1.0161	-0.75146	-21.545	16.888	48.405	0.14209	-0.061035	0.0083008	-77.174	-7.5464	40.2472	-0.052491	-0.075439	-0.19213	-137.0747	-51.98	1832.587	NaN	NaN	NaN
1.426	-100.052	195.6427	779.7903	-0.53388	1.014	-0.76416	8.939	31.222	41.489	0.14355	-0.054443	0.010498	-77.807	39.4114	-0.180899999999999	-0.053223	-0.044434	-0.19482	-139.885	-34.9462	1824.983	NaN	NaN	NaN
1.428	-81.817	192.3311	786.3152	-0.53398	1.0103	-0.77813	-4.199	41.472	29.4826	0.14258	-0.058594	0.012207	-65.3312	42.229	39.81121	-0.049805	-0.026855	-0.18799	-144.8856	-34.548	1778.7	NaN	NaN	NaN
1.43	-68.546	187.4374	787.0994	-0.54688	1.0006	-0.78946	-2.725	38.6912	27.8931	0.13135	-0.061523	0.01709	-37.135	45.588	48.6079	-0.045898	-0.022949	-0.17969	-126.348	-51.754	1741.6437	NaN	NaN	NaN
1.432	-103.798	191.65984	790.0262	-0.5583	0.98936	-0.79873	0.885999999999999	49.481	-8.165	0.12988	-0.065918	0.019043	-42.96	16.829	67.722	-0.041992	-0.015625	-0.16748	-87.347	-35.065	1711.6082	NaN	NaN	NaN
1.434	-95.154	183.4723	783.9214	-0.56836	0.97266	-0.81055	-29.226	11.129	23.4117	0.12207	-0.07666	0.016602	-23.314	33.099	20.0206	-0.039795	-0.020263	-0.16357	-84.982	-36.658	1660.046	NaN	NaN	NaN
1.436	-73.243	190.124	781.7445	-0.58311	0.96045	-0.81904	-26.028	1.5485	28.6788	0.11841	-0.087891	0.020996	1.334	33.545	9.952	-0.027832	-0.025879	-0.15576	-56.031	28.4561	1602.488	NaN	NaN	NaN
1.438	-99.611	201.46	772.696	-0.59551	0.94814	-0.82724	-37.254	15.082	23.6852	0.11133	-0.094238	0.022949	-1.54	52.1153	15.515	-0.010742	-0.037598	-0.14355	-90.4487	39.7628	1523.138	NaN	NaN	NaN
1.44	-93.851	207.087	747.7381	-0.61191	0.94267	-0.83662	-29.872	14.598	24.2973	0.10889	-0.098145	0.015137	-28.674	13.3008	42.433	0.0073244	-0.04663	-0.13794	-49.448	76.226	1479.812	NaN	NaN	NaN
1.442	-108.632	199.7586	747.6368	-0.62002	0.94433	-0.84619	-39.467	46.072	2.12	0.10791	-0.098633	0.010742	-13.078	19.215	32.8163	0.016602	-0.056152	-0.12891	-51.543	74.63806	1440.986	NaN	NaN	NaN
1.444	-99.061	201.5852	757.036	-0.62549	0.94189	-0.85303	-66.3294	29.7989	38.4289	0.11133	-0.10059	-0.0039063	7.869	-2.4524	18.16636	0.039063	-0.076172	-0.12451	-22.216	110.719	1460.448	NaN	NaN	NaN
1.446	-89.855	208.514	760.512	-0.6293	0.93633	-0.86719	-85.2592	36.691	26.907322	0.11914	-0.10254	-0.003418	15.004	22.8747	17.2919	0.051758	-0.084473	-0.11719	-34.483	130.9773	1444.204	NaN	NaN	NaN
1.448	-78.568	204.531	763.768	-0.62725	0.93838	-0.87647	-69.8778	49.13728	6.727	0.13184	-0.10986	-0.014648	-20.375	-2.2366	32.11	0.056152	-0.097168	-0.10938	-30.534	154.36574	1455.867	NaN	NaN	NaN
1.45	-80.555	185.469	764.768	-0.62138	0.93018	-0.88701	-65.891	33.1941	31.516	0.14941	-0.11719	-0.03418	-45.631	28.0559	34.4408	0.060791	-0.10669	-0.10254	-42.176	184.072	1402.4005	NaN	NaN	NaN
1.452	-90.315	195.767	772.629	-0.61358	0.92315	-0.89912	-72.551	53.298	13.843	0.1543	-0.12939	-0.035156	-63.498	49.292	13.5179	0.068848	-0.10693	-0.097168	-48.536	190.476	1386.2418	NaN	NaN	NaN
1.454	-68.488	180.818	763.304	-0.60449	0.9082	-0.9082	-81.1799	32.2775	34.57571	0.15723	-0.1377	-0.047363	-22.949	71.937	30.0752	0.075195	-0.10449	-0.09082	-20.085	240.375	1369.109	NaN	NaN	NaN
1.456	-101.102	169.085	756.205	-0.6044	0.89287	-0.91963	-62.639	51.044	7.8693	0.1499	-0.14942	-0.05835	-13.261	37.554	23.785	0.094727	-0.10742	-0.082031	-21.037	237.711	1338.7505	NaN	NaN	NaN
1.458	-89.252	160.874	785.279	-0.60791	0.88144	-0.93076	-64.6362	70.235	-7.938	0.14014	-0.14844	-0.072754	-25.805	17.51	44.704	0.12939	-0.10352	-0.077148	6.705	247.428	1312.002	NaN	NaN	NaN
1.46	-90.725	149.192	805.93	-0.62041	0.86895	-0.93857	-61.4007	28.944	28.6447	0.12891	-0.14697	-0.095703	-61.434	0.422000000000001	26.5869	0.15551	-0.10376	-0.068604	-33.1576	198.6379	1236.985	NaN	NaN	NaN
1.462	-84.472	148.533	819.84	-0.63994	0.86123	-0.94326	-56.926	44.192	16.96	0.12793	-0.14404	-0.10498	-68.6615	42.742	7.3328	0.18555	-0.10303	-0.06543	-32.4883	208.037	1188.991	NaN	NaN	NaN
1.464	-108.818	153.362	859.82	-0.66016	0.85352	-0.94727	-62.877	30.4549	40.659	0.12158	-0.12695	-0.13428	-65.339	58.0524	3.01395	0.21924	-0.10156	-0.064453	-44.512	206.867	1157.2712	NaN	NaN	NaN
1.466	-102.779	173.067	897.48	-0.68252	0.85478	-0.96006	-29.257	47.216	21.1364	0.12232	-0.11572	-0.1582	-64.0856	56.549	33.4728	0.23486	-0.10205	-0.057129	-3.693	248.165	1131.795	NaN	NaN	NaN
1.468	-105.84693	183.644	955.46	-0.70303	0.84932	-0.97881	-16.754	61.4676	26.256	0.12305	-0.10107	-0.18018	-90.105	48.1257	31.0702	0.26611	-0.10986	-0.049316	-34.431	289.53569	1073.16814	NaN	NaN	NaN
1.47	-129.252	211.6029	999.59	-0.73193	0.84932	-0.99521	-18.964	31.1107	60.884	0.12256	-0.073242	-0.21729	-76.325	52.343	16.3827	0.27197	-0.11548	-0.043457	-18.805	302.657	1042.2031	NaN	NaN	NaN
1.472	-141.958	227.8227	1062.02	-0.76826	0.84795	-1.0087	-30.57	42.73	15.6068	0.12354	-0.057617	-0.22998	-66.506	48.04411	-4.167	0.28418	-0.12256	-0.030762	-31.583	312.45	958.928	NaN	NaN	NaN
1.474	-149.97	235.615	1118.14	-0.81396	0.84424	-1.0269	-11.168	22.385	43.105	0.12061	-0.039551	-0.27197	-96.1847	56.1278	34.397	0.2915	-0.13232	-0.023926	-59.1522	294.409	948.0612	NaN	NaN	NaN
1.476	-127.031	219.3673	1208.9	-0.88047	0.8459	-1.0461	13.484	34.821	29.7459	0.096191	-0.023926	-0.31445	-89.6971	38.2895	54.7215	0.29346	-0.13965	-0.020508	-56.245	324.012	919.418	NaN	NaN	NaN
1.478	-156.608	208.773	1246.28	-0.95655	0.85107	-1.0639	-2.338	45.976	43.2561	0.083496	-0.019531	-0.33936	-59.577	47.9098	56.4531	0.27588	-0.14893	-0.014648	-77.6267	296.726	894.524	NaN	NaN	NaN
1.48	-152.728	175.066	1264.52	-1.0444	0.87022	-1.0835	-17.856	10.76056	86.338	0.02832	-0.010254	-0.38428	-38.9	54.517	27.2199	0.27392	-0.15552	-0.0080567	-29.208	303.028	794.4075	NaN	NaN	NaN
1.482	-123.538	135.411	1290.26	-1.1362	0.8956	-1.1007	-9.507	20.4843	50.331	-0.032471	-0.0063476	-0.41065	-39.785	47.022	31.2258	0.2583	-0.15869	-0.0083008	-72.9431	253.4124	719.623	NaN	NaN	NaN
1.484	-144.514	98.19	1302.33	-1.2266	0.93359	-1.1152	-16.772	2.298	99.6109	-0.10156	-0.00048828	-0.44043	-54.295	35.4679	41.1285	0.25537	-0.16064	-0.0014648	-64.1705	253.462	651.901	NaN	NaN	NaN
1.486	-140.337	58.6	1318.01	-1.3051	0.97802	-1.1288	-0.505000000000003	8.304	122.607	-0.19043	-0.01123	-0.46631	-44.654	43.2095	51.1515	0.25049	-0.15527	-0.0058594	-68.790529	219.524	629.9395	NaN	NaN	NaN
1.488	-142.767	8.75	1291.96	-1.3675	1.0362	-1.1448	3.365	8.7417	174.4049	-0.26465	-0.0058594	-0.5	-41.848	56.4827	20.50847	0.23877	-0.15186	-0.0043945	-41.342	244.273	603.045	NaN	NaN	NaN
1.49	-109.754	-28.29	1292.64	-1.3952	1.1007	-1.16	-20.052	-15.9919	247.847	-0.43018	0.0053711	-0.5874	-7.275	59.5877	26.205	0.23803	-0.14478	-0.0075684	-31.95	229.524	523.503	NaN	NaN	NaN
1.492	-121.176	-33.96	1268.46	-1.3882	1.1665	-1.1675	-2.672	24.8012	276.128	-0.5791	0.019775	-0.65381	16.522	30.7613	32.133	0.23096	-0.14307	-0.0083008	-13.539	206.231	491.783	NaN	NaN	NaN
1.494	-122.108	-57.39	1246.74	-1.3379	1.2246	-1.1738	-6.942	27.4454	407.1838	-0.74805	0.032227	-0.71875	-14.273	3.49108	60.782	0.21875	-0.13672	-0.024902	-16.548	210.1302	441.354	NaN	NaN	NaN
1.496	-108.348	-67.14	1224.79	-1.2459	1.2514	-1.1643	-22.077	41.8451	532.97	-1.0239	0.088379	-0.78174	-19.982	19.8178	40.6688	0.2124	-0.13428	-0.019531	-33.463	194.8374	442.1758	NaN	NaN	NaN
1.498	-82.567	-56.42	1193.71	-1.1195	1.2465	-1.1493	-37.4523	53.238	672.447	-1.1992	0.12939	-0.83594	-43.306	32.7234	46.567	0.20068	-0.12988	-0.021484	-8.593	243.7642	399.5974	NaN	NaN	NaN
1.5	-85.6239	-39.65	1155.99	-0.96367	1.2023	-1.1246	-54.802	34.932	824.286	-1.5854	0.25049	-0.93896	-10.945	47.715	49.535	0.18994	-0.12939	-0.025391	-52.8297	226.485	381.22	NaN	NaN	NaN
1.502	-96.171	-19.81	1125.07	-0.79756	1.1247	-1.1005	-60.922	64.5443	920.386	-1.906	0.40381	-1.0672	-22.111	24.4003	85.083	0.17139	-0.12695	-0.029785	-35.285	243.546	333.799	NaN	NaN	NaN
1.504	-96.4889	-8.18000000000001	1082.31	-0.63037	1.0337	-1.0757	-54.265	48.578	1083.551	-2.2085	0.58252	-1.1851	-4.24	17.61213	41.7056	0.15039	-0.12549	-0.032715	-48.7183	202.401	294.2117	NaN	NaN	NaN
1.506	-60.336	7.91999999999999	1058.63	-0.48076	0.9333	-1.0645	-12.97	53.376	1186.0943	-2.5132	0.95166	-1.3286	-24.458	8.5402	20.9896	0.13721	-0.12354	-0.037109	-13.927	226.383	252.416	NaN	NaN	NaN
1.508	-48.46	8.74000000000001	1025.59	-0.33506	0.83877	-1.0612	-38.6896	74.114	1259.608	-2.6133	1.1992	-1.4004	-4.31	27.263	-8.4565	0.1084	-0.12354	-0.04248	-14.504	222.817	237.887	NaN	NaN	NaN
1.51	-61.72	-6.16	995.92	-0.2081	0.754	-1.064	-54.987	58.209	1309.796	-2.6895	1.7207	-1.5625	-53.003	10.689	24.1237	0.093261	-0.12304	-0.049805	-9.21600000000001	218.3994	237.3065	NaN	NaN	NaN
1.512	-43.145	-22.29	976.17	-0.10352	0.67412	-1.0597	-23.0338	50.084	1285.8862	-2.6162	1.9692	-1.7007	-62.926	12.365	18.8206	0.075195	-0.11914	-0.057617	-37.367	183.1348	208.29576	NaN	NaN	NaN
1.514	-1.14399999999999	-39.47	951.33	-0.0053711	0.58984	-1.0781	-22.5863	-18.01874	1279.286	-2.3608	2.0493	-1.7808	-62.511	2.9123	38.0843	0.058105	-0.11182	-0.067871	-34.316	148.697	174.6399	NaN	NaN	NaN
1.516	5.71700000000001	-58.05	926.48	0.08301	0.51982	-1.0915	-34.3399	-55.401	1247.684	-1.625	1.8066	-1.6348	-44.872	39.1779	9.3067	0.053223	-0.10645	-0.071289	-39.553	174.5811	131.094	NaN	NaN	NaN
1.518	-3.542	-74.97	911.17	0.15908	0.45703	-1.091	-18.622	-64.9941	1227.012	-1.2046	1.5903	-1.5171	-60.37988	39.5464	35.419	0.045898	-0.10107	-0.095215	-34.28	150.5421	173.8818	NaN	NaN	NaN
1.52	19.824	-85.23	889.242	0.21533	0.40547	-1.0961	-20.489	-83.383	1236.4132	-0.55664	1.1504	-1.3574	-55.7	57.811	29.4634	0.04248	-0.095215	-0.10132	-53.334	167.498	168.746	NaN	NaN	NaN
1.522	42.306	-99.496	884.669	0.25381	0.36758	-1.1102	-11.164	-60.824	1207.094	-0.31836	0.89111	-1.3374	-96.5082	41.379	32.2456	0.035645	-0.1001	-0.11523	-69.1	131.89	161.727	NaN	NaN	NaN
1.524	8.467	-104.301	877.726	0.2793	0.34619	-1.1206	-28.176	-82.324	1241.8537	-0.20313	0.69922	-1.3613	-84.56	60.149	4.0844	0.037109	-0.093262	-0.11572	-77.8681	142.757	113.1467	NaN	NaN	NaN
1.526	18.078	-126.989	880.542	0.29707	0.32774	-1.1296	-24.97	-88.2758	1229.374	-0.13721	0.51318	-1.3569	-83.9388	43.2895	22.6603	0.035156	-0.095215	-0.13037	-96.515	84.0527	94.6271	NaN	NaN	NaN
1.528	36.723	-148.612	895.958	0.30518	0.32207	-1.1562	-3.424	-68.597	1240.97	-0.12598	0.44531	-1.3516	-52.744	44.195	12.802	0.041504	-0.087891	-0.15674	-67.202	71.47917	110.2119	NaN	NaN	NaN
1.53	48.195	-149.535	907.129	0.30713	0.32637	-1.191	-2.842	-71.028	1297.537	-0.11914	0.39844	-1.3867	-57.503	10.2	13.876	0.040283	-0.093261	-0.17505	-92.5332	56.7538	120.015	NaN	NaN	NaN
1.532	27.065	-147.129	891.761	0.30283	0.3373	-1.2301	-42.763	-45.245	1302.2546	-0.12158	0.39673	-1.4214	-56.701	42.654	-5.546	0.039551	-0.084473	-0.19336	-57.562	37.758	83.809	NaN	NaN	NaN
1.534	31.17	-135.428	865.041	0.29297	0.35742	-1.2734	-71.487	-44.485	1342.84	-0.12646	0.41455	-1.4546	-78.5689	47.7222	-0.3584	0.022461	-0.084473	-0.21289	-81.5518	32.8725	30.1991	NaN	NaN	NaN
1.536	50.49	-115.757	871.241	0.25625	0.38398	-1.3156	-25.472	-47.652	1315.775	-0.15771	0.40869	-1.48	-51.892	79.0447	20.0458	0.013184	-0.07666	-0.22314	-78.1254	4.255	5.98111	NaN	NaN	NaN
1.538	57.605	-89.514	879.133	0.20342	0.42041	-1.3612	-16.606	-100.91	1298.708	-0.18896	0.40283	-1.48	-53.107	50.566	48.8456	-0.022461	-0.06543	-0.24512	-98.4897	8.108	-8.092	NaN	NaN	NaN
1.54	55.354	-83.061	867.405	0.13935	0.46846	-1.3968	-16.728	-178.451	1303.868	-0.30908	0.39014	-1.5093	-19.635	60.8626	39.1435	-0.050049	-0.051269	-0.2544	-58.339	-4.804	30.6811	NaN	NaN	NaN
1.542	46.471	-73.634	865.922	0.065039	0.52109	-1.428	9.977	-212.987	1309.256	-0.43799	0.42773	-1.5474	-38.841	43.575	40.91	-0.077148	-0.033691	-0.26758	-29.855	27.1251	15.724	NaN	NaN	NaN
1.544	61.396	-75.157	875.603	-0.0097656	0.57666	-1.4585	-28.386	-223.304	1362.2231	-0.58154	0.49072	-1.5815	-22.936	67.001	60.2092	-0.10547	-0.010742	-0.28271	-44.882	2.987	19.102	NaN	NaN	NaN
1.546	43.675	-69.055	898.204	-0.087207	0.63897	-1.4763	-20.617	-211.37	1366.783	-0.78613	0.62891	-1.6602	-30.838	41.827	47.3568	-0.11816	0.0048828	-0.29883	-18.371	38.239	11.996	NaN	NaN	NaN
1.548	30.213	-85.79	913.744	-0.1582	0.69687	-1.4871	-17.934	-208.706	1386.788	-0.88281	0.7041	-1.7031	-17.69	43.6414	47.033	-0.13428	0.029785	-0.31445	-69.297134	10.95823	24.9999	NaN	NaN	NaN
1.55	25.552	-85.202	912.889	-0.22305	0.74961	-1.4937	19.2894	-219.675	1426.261	-1.0483	0.89111	-1.7944	-12.336	21.5219	40.0335	-0.14844	0.050537	-0.32666	-26.834	56.766	27.183	NaN	NaN	NaN
1.552	51.887	-81.042	919.475	-0.27959	0.78408	-1.4905	24.586	-214.165	1429.6059	-1.1597	1.0122	-1.8643	-18.008	33.8737	38.1185	-0.15674	0.066406	-0.34473	-43.831	52.787	24.139	NaN	NaN	NaN
1.554	27.452	-73.094	934.313	-0.32959	0.81006	-1.4702	-21.7515	-173.366	1501.297	-1.2437	1.106	-1.937	3.113	20.0833	51.984	-0.17285	0.09082	-0.37256	-12.152	51.2545	15.1264	NaN	NaN	NaN
1.556	25.79	-81.592	914.492	-0.37344	0.8166	-1.4386	-27.9055	-116.612	1508.4177	-1.3086	1.1641	-2.0117	-8.261	34.075	57.7709	-0.17725	0.094238	-0.38379	-36.619	40.986	-21.4257	NaN	NaN	NaN
1.558	27.338	-65.806	907.721	-0.42188	0.80381	-1.4086	-31.4819	-80.362	1512.2054	-1.3242	1.1758	-2.0469	-29.771	22.0447	24.943	-0.18408	0.1084	-0.39941	-15.21	25.861	-10.242	NaN	NaN	NaN
1.56	51.13	-61.946	906.065	-0.475	0.7792	-1.3832	-10.9344	-76.518	1513.938	-1.3335	1.1938	-2.1245	-38.666	37.4712	46.2559	-0.19336	0.11304	-0.40918	-36.624	40.0738	2.728	NaN	NaN	NaN
1.562	37.592	-52.459	889.701	-0.51817	0.74141	-1.3637	16.329	-97.46	1488.023	-1.3516	1.2168	-2.1728	-26.263	22.684	56.6266	-0.20068	0.11426	-0.42285	-38.915	29.4692	20.9139	NaN	NaN	NaN
1.564	32.128	-55.623	876.974	-0.55713	0.69775	-1.3413	22.9916	-116.55754	1511.3907	-1.3784	1.2505	-2.2241	-22.252	11.9887	105.444169	-0.22119	0.10938	-0.44434	-10.889	73.304	32.3246	NaN	NaN	NaN
1.566	15.743	-42.939	860.932	-0.59082	0.65742	-1.3283	43.2156	-107.4958	1509.527	-1.437	1.2974	-2.2749	-37.229	-21.0961	115.806	-0.23828	0.10156	-0.44922	-28.968	49.584	31.8323	NaN	NaN	NaN
1.568	41.065	-37.269	846.942	-0.61592	0.62978	-1.3134	1.6797	-92.889	1524.97022	-1.4609	1.3125	-2.2871	-26.073	-22.3755	157.1224	-0.2959	0.080566	-0.46729	-10.379	87.607	28.6368	NaN	NaN	NaN
1.57	14.756	-14.677	842.569	-0.63975	0.60908	-1.302	25.7775	-76.556	1532.623	-1.5015	1.3208	-2.2964	-41.6204	-9.8477	181.4151	-0.3772	0.054932	-0.48633	-31.318	61.209	50.7024	NaN	NaN	NaN
1.572	8.021	-3.29799999999999	819.162	-0.65547	0.60586	-1.2922	65.656	-77.105	1528.599	-1.5014	1.2939	-2.2871	-12.3446	4.2506	299.723	-0.47119	0.018555	-0.51514	-51.818	80.668	69.133	NaN	NaN	NaN
1.574	13.409	11.833	805.515	-0.65967	0.60791	-1.2847	53.236	-99.914	1571.193	-1.4805	1.2266	-2.2539	13.63371	-7.0669	419.137	-0.63477	-0.044922	-0.56152	-75.3657	48.4868	79.207	NaN	NaN	NaN
1.576	23.82	12.934	797.101	-0.66348	0.62363	-1.2717	46.1816	-123.706	1590.981	-1.4238	1.1094	-2.1895	-10.1708	12.3834	593.839	-0.74512	-0.073242	-0.59229	-49.932	45.1027	63.164	NaN	NaN	NaN
1.578	10.223	17.045	787.819	-0.64727	0.63125	-1.2662	50.5094	-104.6647	1607.079	-1.3901	1.0493	-2.1616	-10.1702	20.603	775.199	-0.99902	-0.12988	-0.625	-78.6979	42.3267	30.505	NaN	NaN	NaN
1.58	13.355	1.901	764.726	-0.62422	0.63711	-1.2549	24.3595	-75.6248	1609.797	-1.3374	0.95166	-2.1167	-5.3176	13.7428	982.197	-1.2656	-0.15283	-0.65283	-41.403	29.3738	31.832	NaN	NaN	NaN
1.582	32.185	-7.418	759.225	-0.59365	0.64073	-1.237	41.047	-34.728	1545.816	-1.2839	0.91138	-2.1003	59.869	13.791	1153.585	-1.5659	-0.16992	-0.69092	-71.149	50.945	47.02446	NaN	NaN	NaN
1.584	26.051	-0.822000000000003	743.132	-0.56006	0.62891	-1.2207	35.176	-26.3576	1540.166	-1.228	0.88721	-2.0815	31.509	20.3141	1331.4383	-1.9883	-0.13135	-0.75586	-76.48	26.4964	66.478	NaN	NaN	NaN
1.586	13.286	-6.297	720.069	-0.51748	0.61787	-1.2034	24.5084	-39.1619	1478.144	-1.1553	0.88086	-2.082	33.0848	21.7823	1426.058286	-2.3201	-0.025391	-0.81031	-74.20638	42.735	39.2413	NaN	NaN	NaN
1.588	4.375	-11.178	704.121	-0.48086	0.59931	-1.1865	41.0592	-46.497	1445.132	-1.1206	0.88525	-2.0815	47.2462	12.493	1503.572	-2.6362	0.19678	-0.75537	-77.6799	10.7747	34.66349	NaN	NaN	NaN
1.59	10.555	-5.885	690.116	-0.44492	0.5876	-1.1661	55.393	-18.5657	1445.647	-1.0513	0.91064	-2.062	97.093	-0.564	1514.167	-3.2363	0.5	-0.87109	-68.0851	28.68873	19.3149	NaN	NaN	NaN
1.592	-5.176	13.828	687.83	-0.41797	0.57441	-1.1485	34.3779	23.3537	1402.917	-1.0085	0.91919	-2.0408	76.526	-56.493	1566.297	-3.4897	0.729	-0.95654	-64.582	-6.2042	52.7629	NaN	NaN	NaN
1.594	-11.528	16.619	678.377	-0.38965	0.55859	-1.123	18.7064	58.043	1394.00346	-0.97998	0.92822	-2.0132	27.193	-70.2	1568.461	-3.8276	1.3169	-1.1479	-50.404	28.4457	46.2667	NaN	NaN	NaN
1.596	-23.136	14.937	676.503	-0.37764	0.54775	-1.0938	28.1508	72.894	1355.03	-0.9585	0.93213	-1.9683	-22.115	-128.104	1599.701	-3.8669	1.7249	-1.3489	-77.0846	14.703	26.915	NaN	NaN	NaN
1.598	-4.973	31.756	653.104	-0.36484	0.53633	-1.0625	-2.485	79.505	1322.892	-0.95459	0.93311	-1.9448	-30.223	-127.3118	1571.355	-3.6069	1.9946	-1.5562	-42.949	25.9871	10.999	NaN	NaN	NaN
1.6	-23.458	36.5819	650.642	-0.35508	0.52735	-1.0355	-9.323	69.3641	1332.149	-0.93896	0.92432	-1.9038	-1.424	-142.859	1576.7	-2.5801	2	-1.6777	-57.3951	20.1792	17.2718	NaN	NaN	NaN
1.602	-12.442	39.9369	622.599	-0.34629	0.52451	-1.0048	-15.612	79.556	1319.762	-0.91699	0.91846	-1.8624	64.774	-156.893	1548.009	-1.9741	1.8462	-1.6577	-29.039	19.8112	21.8103	NaN	NaN	NaN
1.604	-8.051	48.33927	586.383	-0.33789	0.51563	-0.97754	-62.587	86.152	1323.2038	-0.88867	0.9082	-1.8242	65.136	-149.1994	1561.6591	-1.0347	1.3745	-1.5854	-31.252	58.487	12.1577	NaN	NaN	NaN
1.606	-1.08799999999999	67.0938	558.933	-0.32334	0.50849	-0.9419	-71.5845	98.371	1301.437	-0.85059	0.8833	-1.769	10.675	-87.052	1614.007	-0.62695	0.99268	-1.4956	-18.21	30.7016	21.7995	NaN	NaN	NaN
1.608	-30.027	61.967	546.9	-0.30967	0.49932	-0.90908	-47.8317	114.628	1277.569	-0.83008	0.86328	-1.7383	-67.4154	-4.56999999999999	1682.088	-0.43652	0.62695	-1.4941	-32.813	38.5639	-4.982	NaN	NaN	NaN
1.61	-21.867	51.1172	538.821	-0.29287	0.49307	-0.87783	-62.5513	87.82786	1260.8004	-0.80225	0.82861	-1.6733	-96.375	18.59	1704.402	-0.3999	0.37354	-1.519	-30.274	-1.158	-2.6148	NaN	NaN	NaN
1.612	-33.262	50.1211	522.139	-0.28164	0.48047	-0.84726	-37.914	101.0427	1206.223	-0.78491	0.80444	-1.6257	-67.681	-6.22999999999999	1639.8574	-0.41211	0.30273	-1.4844	-33.001	54.2595	-0.00799999999999912	NaN	NaN	NaN
1.614	-24.282	50.066	512.406	-0.26514	0.46826	-0.81104	-22.121	103.819	1207.249	-0.76465	0.77734	-1.5703	-28.432	-108.989	1624.65	-0.52344	0.28369	-1.4453	-10.561	26.2605	28.8713	NaN	NaN	NaN
1.616	-37.778	42.1951	504.305	-0.25547	0.45225	-0.77334	-45.6585	117.962	1187.563	-0.7207	0.74609	-1.5059	-52.2999	-155.907	1634.228	-0.65381	0.32569	-1.4595	0.591000000000001	63.322	27.436	NaN	NaN	NaN
1.618	-34.157	37.4601	506.186	-0.24375	0.44394	-0.7372	-28.4204	147.253	1179.429	-0.69385	0.72803	-1.4702	-83.135	-223.13	1665.891	-0.77344	0.39551	-1.4883	-40.017	42.8731	42.5279	NaN	NaN	NaN
1.62	-33.33	49.36	475.665	-0.2336	0.43574	-0.71064	-34.8623	135.604	1176.915	-0.62842	0.69678	-1.3999	-113.673	-233.054	1646.173	-0.89209	0.49463	-1.5366	-31.239	69.76	12.0087	NaN	NaN	NaN
1.622	-12.502	57.821	443.771	-0.21992	0.41885	-0.67461	-12.898	172.771	1103.3822	-0.58325	0.67211	-1.3552	-90.351	-280.137	1647.195	-0.94873	0.55225	-1.5562	-40.5333	71.722	21.0356	NaN	NaN	NaN
1.624	-23.859	61.133	437.072	-0.20459	0.40186	-0.63818	-22.201	183.8584	1061.65	-0.54395	0.64355	-1.3008	-46.218	-282.025	1626.591	-1.0996	0.63086	-1.6094	-19.915	72.477	50.438	NaN	NaN	NaN
1.626	-13.583	57.8837	430.09	-0.19472	0.39287	-0.61104	-24.495	211.279	1018.297	-0.50439	0.61377	-1.231	-27.329	-302.468	1661.730863	-1.2513	0.66626	-1.6609	-60.16	62.9858	36.7693	NaN	NaN	NaN
1.628	-20.968	39.5271	426.273	-0.18427	0.37597	-0.57812	-63.7312	222.591	992.7921	-0.48486	0.59229	-1.1992	-38.947	-267.399	1685.016	-1.4199	0.70605	-1.7031	-42.562	31.4833	47.7865	NaN	NaN	NaN
1.63	-21.866	47.8456	403.884	-0.17334	0.3623	-0.54297	-73.0985	193.362	1002.719	-0.45703	0.56055	-1.125	-34.8173	-258.242	1756.559	-1.6636	0.78955	-1.7515	-59.7951	51.5501	17.338	NaN	NaN	NaN
1.632	-20.567	39.9326	403.828	-0.16211	0.35146	-0.51534	-37.131	192.743	942.478	-0.43896	0.53564	-1.0542	-42.493	-166.576	1779.923	-1.7773	0.8457	-1.793	-60.847	35.5572	40.184	NaN	NaN	NaN
1.634	-10.843	38.7671	393.02	-0.15137	0.33691	-0.48828	-40.924	155.8863	907.571	-0.43066	0.52832	-1.0176	-8.882	-121.508	1769.935	-1.9609	0.98047	-1.875	-57.1644	74.375	53.7111	NaN	NaN	NaN
1.636	-23.336	38.6892	387.067	-0.13496	0.33037	-0.46279	-34.971	145.1986	880.7023	-0.41455	0.51367	-0.95166	43.65	-43.438	1685.376	-2.0307	1.0679	-1.9331	-76.174	36.7411	87.75	NaN	NaN	NaN
1.638	-31.459	50.309	369.459	-0.11992	0.31602	-0.43545	-24.143	173.2555	838.1902	-0.39551	0.50073	-0.90528	40.021	-47.627	1644.664	-2.0444	1.1216	-1.9858	-75.5286	54.852	46.5829	NaN	NaN	NaN
1.64	-27.815	52.636	343.874	-0.10547	0.29883	-0.41123	-52.112	164.6183	814.7377	-0.38037	0.48486	-0.84814	24.694	-39.763	1620.541	-1.9766	1.0996	-2.0645	-79.4331	16.7946	47.7819	NaN	NaN	NaN
1.642	-5.91000000000001	62.288	336.063	-0.093946	0.28633	-0.38584	-23.831	200.9331	742.227	-0.35693	0.46436	-0.78271	22.2368	-60.204	1670.539	-1.9194	1.0708	-2.0933	-49.527	28.03587	38.105	NaN	NaN	NaN
1.644	-17.552	67.883	347.938	-0.086914	0.271	-0.37451	-25.293	165.105	749.901	-0.34717	0.45557	-0.75342	86.831	-2.103	1688.093	-1.8281	1.0664	-2.1074	-81.1534	19.532	25.5575	NaN	NaN	NaN
1.646	-20.239	76.425	338.111	-0.073925	0.25713	-0.35049	-32.926	149.368	725.7562	-0.32471	0.42383	-0.68262	105.712	-19.1369	1684.187	-1.8103	1.1145	-2.1355	-70.067	20.436	48.5867	NaN	NaN	NaN
1.648	-20.124	60.513	345.64	-0.064649	0.24033	-0.3335	-27.355	172.0248	674.93205	-0.31299	0.40112	-0.63818	117.167	-23.074	1658.275	-1.8418	1.1855	-2.168	-77.5574	24.953	38.0714	NaN	NaN	NaN
1.65	-10.992	55.275	340.535	-0.057226	0.22509	-0.31553	-40.81	147.2338	653.1093	-0.29541	0.37939	-0.58545	109.548	-53.1553	1672.49	-1.9004	1.2852	-2.1875	-53.455	-1.492	19.277	NaN	NaN	NaN
1.652	-21.082	61.897	324.492	-0.054297	0.21377	-0.30039	-63.06	197.356	591.038	-0.27539	0.34961	-0.51953	105.492	-20.14176	1659.95591	-1.9155	1.3091	-2.1753	-48.6002	29.1758	16.184	NaN	NaN	NaN
1.654	-28.342	62.187	331.753	-0.05127	0.2041	-0.28564	-89.8452	176.4203	597.834	-0.271	0.34619	-0.49707	114.004	-10.605	1677.415	-1.9292	1.2798	-2.1265	-26.182	6.3163	41.547	NaN	NaN	NaN
1.656	-17.972	55.586	317.96	-0.048535	0.19551	-0.27637	-69.829	167.7662	563.7356	-0.24805	0.31641	-0.43604	107.749	3.215	1659.328	-1.9165	1.1435	-2.0776	-30.872	60.24	44.373	NaN	NaN	NaN
1.658	-19.701	54.73	301.975	-0.044726	0.19121	-0.26162	-55.842	172.3531	484.621	-0.21997	0.29419	-0.38403	62.7817	-57.096	1631.687	-1.8804	1.0317	-1.9292	-31.149	23.1934	43.902	NaN	NaN	NaN
1.66	-21.668	56.529	281.121	-0.04082	0.19043	-0.24952	-60.7285	141.97	490.248	-0.19434	0.27197	-0.3374	61.573	-65.111	1602.102	-1.8384	0.7583	-1.8745	-38.083	33.0134	-2.068	NaN	NaN	NaN
1.662	-44.386	49.878	291.451	-0.036133	0.18906	-0.23545	-28.24	179.452	440.581	-0.15186	0.23584	-0.26855	59.278	-44.0667	1544.916	-1.7695	0.65234	-1.873	-32.894	-9.6256	-1.427	NaN	NaN	NaN
1.664	-20.071	50.822	302.029	-0.02832	0.19092	-0.2168	-62.51692	140.939	449.5337	-0.1377	0.22314	-0.25146	92.884	35.113	1490.8618	-1.5801	0.64355	-1.8262	-22.455	6.207	17.517	NaN	NaN	NaN
1.666	-17.38	49.953	302.932	-0.032422	0.19512	-0.20117	-52.482	159.1474	411.0927	-0.11084	0.19678	-0.21045	66.231	71.8787	1417.168	-1.4727	0.72558	-1.7969	-11.712	17.948	45.245	NaN	NaN	NaN
1.668	-24.072	46.851	295.023	-0.029785	0.18955	-0.19355	-34.61	171.9051	345.556	-0.096678	0.17432	-0.17846	25.057	97.7682	1384.092	-1.4126	0.77979	-1.8159	-5.643	14.0937	73.636	NaN	NaN	NaN
1.67	-30.082	41.81	297.193	-0.029004	0.18799	-0.18262	-61.468	126.656	368.40717	-0.073242	0.14648	-0.13281	-44.476	88.022	1368.536	-1.3242	0.77148	-1.7852	-44.742	21.3309	91.5696	NaN	NaN	NaN
1.672	-20.602	43.5778	295.135	-0.032324	0.18476	-0.17695	-37.351	158.698	346.491	-0.054199	0.12939	-0.10547	-21.786	107.8006	1363.796	-1.2905	0.74658	-1.7515	-2.622	3.756	133.56371	NaN	NaN	NaN
1.674	-20.305	58.678	297.15	-0.027344	0.18115	-0.16846	-47.9167	128.39565	367.951	-0.04248	0.11328	-0.075684	-31.288	110.539	1336.253	-1.2505	0.68604	-1.6792	-5.86	22.6799	182.559	NaN	NaN	NaN
1.676	-14.362	63.963	286.967	-0.019531	0.17598	-0.15918	-28.279	138.617	329.5942	-0.024902	0.090332	-0.035645	-28.904	150.7619	1286.529	-1.2319	0.67236	-1.6235	39.056	13.8365	300.0321	NaN	NaN	NaN
1.678	-19.474	49.8	287.015	-0.008496	0.16797	-0.15401	-31.5143	155.501	290.587	-0.016357	0.089111	-0.02539	-68.1615	156.337	1224.33	-1.2144	0.66748	-1.5718	13.9247	51.573	447.505	NaN	NaN	NaN
1.68	-20.471	50.356	279.486	0.00087897	0.16016	-0.15166	-52.122	101.7578	301.0307	-0.0068359	0.087402	-0.015137	-95.5569	183.027	1166.603	-1.1621	0.66309	-1.5156	3.088	22.83321	649.534	NaN	NaN	NaN
1.682	-31.928	51.137	294.8	0.0087892	0.15341	-0.15254	-15.697	131.205	251.4757	0.019043	0.083984	0.01416	-124.315	184.142	1127.579	-1.1235	0.66064	-1.4849	-62.32	51.3489	811.103	NaN	NaN	NaN
1.684	-14.74	59.424	293.723	0.015625	0.13525	-0.15088	-41.413	102.237	238.107	0.031738	0.083984	0.02002	-78.5608	191.388	1112.702	-1.0547	0.64648	-1.4199	-24.577	20.564	965.747	NaN	NaN	NaN
1.686	-15.789	47.221	316.596	0.018359	0.13203	-0.15108	-4.037	120.514	224.48397	0.073242	0.079102	0.044434	-53.827	149.5433	1095.34443	-1	0.63623	-1.3765	25.933	32.9561	1151.585	NaN	NaN	NaN
1.688	-18.305	49.873	320.114	0.01748	0.12491	-0.14912	0.551000000000002	130.675	190.108	0.094726	0.084717	0.049561	-35.5805	158.81	1062.1763	-0.95508	0.62695	-1.3301	-14.123	27.5319	1348.6001	NaN	NaN	NaN
1.69	-29.121	50.623	319.829	0.012402	0.11787	-0.14678	-25.539	72.4184	214.137	0.12646	0.084473	0.063477	-43.484	149.921	1010.59639	-0.88428	0.61768	-1.2661	-3.647	45.25	1506.188	NaN	NaN	NaN
1.692	-31.01	58.56	318.513	0.0025392	0.11494	-0.1458	-23.86	131.438	158.231	0.14941	0.094727	0.055664	-55.952	169.833	979.9463	-0.85156	0.61426	-1.2393	-20.8455	44.694	1587.271	NaN	NaN	NaN
1.694	-24.474	53.151	316.49	-0.012207	0.11572	-0.14404	-23.78	111.1366	152.7417	0.17188	0.088867	0.067383	-88.038	170.392	952.9467	-0.79932	0.59424	-1.1694	19.3851	-1.588	1611.736	NaN	NaN	NaN
1.696	-23.559	54.775	332.104	-0.027735	0.12324	-0.15274	-28.027	127.687	140.7206	0.2002	0.095215	0.080078	-67.041	182.391	932.303	-0.76245	0.57397	-1.114	5.329	-53.7486	1621.544	NaN	NaN	NaN
1.698	-30.29	59.055	321.922	-0.036915	0.13291	-0.15664	-35.397	149.781	116.505	0.22192	0.094727	0.089355	-32.049	166.7607	875.151	-0.73389	0.54443	-1.062	0.0589999999999975	-127.029	1621.136	NaN	NaN	NaN
1.7	-28.061	62.604	328.927	-0.045509	0.14385	-0.16289	-57.158	89.3565	140.699	0.23242	0.094727	0.087891	-18.397	190.8592	814.137	-0.69189	0.49756	-0.97021	-60.6347	-117.788	1593.652	NaN	NaN	NaN
1.702	-18.592	64.481	347.439	-0.055763	0.15909	-0.16846	-41.0522	136.106	107.0156	0.24512	0.093262	0.093262	-31.41	188.177	762.636	-0.67969	0.47461	-0.93164	-86.128	-170.762	1567.036	NaN	NaN	NaN
1.704	-11.889	62.662	349.239	-0.061523	0.17236	-0.1792	-34.845	88.5364	117.82998	0.25049	0.093262	0.097656	-51.573	235.387	729.76	-0.63672	0.42529	-0.84375	-58.079	-155.966	1537.3402	NaN	NaN	NaN
1.706	-32.286	66.431	355.476	-0.069335	0.18457	-0.18848	-38.747	71.1303	117.089	0.23584	0.095215	0.097168	-52.308	234.434	667.2318	-0.60303	0.39258	-0.78174	-64.338	-211.067	1526.2297	NaN	NaN	NaN
1.708	-40.819	64.581	366.122	-0.073729	0.19648	-0.19521	-44.746	90.8236	84.8931	0.23926	0.082764	0.11255	-5.88100000000001	264.937	610.2513	-0.56836	0.35938	-0.72266	-31.379	-183.093	1490.5209	NaN	NaN	NaN
1.71	-22.658	56.78	364.915	-0.08232	0.2121	-0.20576	-56.786	34.712	89.266	0.24414	0.080078	0.12109	-1.064	221.858167	556.991	-0.51416	0.32715	-0.6499	-18.762	-195.1064	1494.00629	NaN	NaN	NaN
1.712	-37.243	75.48	354.803	-0.090917	0.22529	-0.21464	-47	87.432	28.245	0.23633	0.087402	0.11865	0.832000000000001	212.8877	561.58	-0.4917	0.31104	-0.61279	-75.011	-154.036	1540.561	NaN	NaN	NaN
1.714	-39.45	71.678	366.161	-0.097656	0.23926	-0.21924	-72.2585	56.901	44.083	0.2373	0.084473	0.11377	-23.284	203.3214	561.6096	-0.44727	0.28223	-0.54053	-135.5045	-101.26	1583.2289	NaN	NaN	NaN
1.716	-48.837	55.526	373.883	-0.10704	0.25372	-0.2246	-49.713	28.429	71.014	0.25	0.075195	0.12939	-25.682	243.046	558.362	-0.42017	0.26172	-0.48438	-114.157	-53.5	1567.591	NaN	NaN	NaN
1.718	-16.236	55.685	385.691	-0.1213	0.26768	-0.23301	-45.1808	72.7393	50.22378	0.24609	0.077149	0.12451	-13.161	232.7793	469.729	-0.38818	0.24658	-0.43311	-89.516	-92.452	1525.018	NaN	NaN	NaN
1.72	-29.096	65.558	386.434	-0.13303	0.28293	-0.23653	-67.1393	11.762	85.122	0.24316	0.069824	0.1167	-35.096	212.2343	409.568	-0.34619	0.21729	-0.36865	-41.677	-147.286	1518.341	NaN	NaN	NaN
1.722	-34.245	65.45	396.333	-0.14493	0.29112	-0.24209	-53.544	62.4298	47.2493	0.23242	0.062012	0.11523	-54.973	162.235	371.079	-0.33008	0.20703	-0.33789	-74.3063	-198.8109	1549.049	NaN	NaN	NaN
1.724	-33.581	57.915	412.843	-0.1582	0.2998	-0.24951	-54.023	55.8277	60.1784	0.23145	0.059082	0.12256	-102.6556	168.9704	377.612	-0.30664	0.18652	-0.26416	-81.6626	-265.848	1583.5717	NaN	NaN	NaN
1.726	-3.942	62.314	415.1	-0.17118	0.31091	-0.25497	-62.941	27.6818	69.765	0.21289	0.054199	0.11377	-57.165	164.5337	375.462	-0.28027	0.16113	-0.19385	-89.148	-238.708	1574.0406	NaN	NaN	NaN
1.728	-18.348	67.159	420.503	-0.17935	0.31649	-0.26611	-47.214	73.394	19.6877	0.20386	0.053711	0.10792	-73.5231	181.206	352.1031	-0.26123	0.15088	-0.15918	-33.072	-277.123	1576.1892	NaN	NaN	NaN
1.73	-35.228	67.157	421.234	-0.18913	0.32194	-0.27194	-20.019	10.2843	31.93156	0.19775	0.054688	0.10889	-73.06225	129.896	303.7648	-0.21875	0.11914	-0.10449	-18.134	-245.565	1592.175	NaN	NaN	NaN
1.732	-38.584	58.511	429.821	-0.19625	0.32706	-0.28425	-22.126	38.1541	1.315	0.18164	0.063965	0.092285	-102.4538	131.4276	286.54094	-0.18164	0.1023	-0.065918	-9.28	-274.811	1616.226	NaN	NaN	NaN
1.734	-18.641	64.958	434.679	-0.19775	0.3252	-0.29785	-21.222	26.5459	3.595	0.17725	0.067871	0.085938	-116.8972	144.662	229.822	-0.14404	0.085938	-0.032227	7.5	-238.37	1661.929	NaN	NaN	NaN
1.736	-26.725	78.239	440.322	-0.20277	0.32975	-0.31062	-36.821	-16.4681	31.4174	0.16357	0.08252	0.076172	-81.367	190.058	253.287	-0.098145	0.048828	0.0092773	-23.7415	-205.057	1702.1836	NaN	NaN	NaN
1.738	-24.796	82.567	457.186	-0.20453	0.32736	-0.32131	-28.545	55.3951	-0.137999999999998	0.15991	0.094971	0.067383	-56.587	187.879	234.907	-0.081055	0.029785	0.02832	-30.638	-128.492	1735.925	NaN	NaN	NaN
1.74	-23.939	81.064	455.646	-0.20525	0.32974	-0.33733	-22.501	5.515	17.5661	0.16016	0.10547	0.067383	-86.712257	156.274	232.353	-0.04834	-0.010254	0.061523	-27.2398	-50.721	1772.037	NaN	NaN	NaN
1.742	0.0790000000000077	84.954	458.787	-0.20887	0.33384	-0.34962	-25.384	29.9224	23.7998	0.16504	0.12451	0.069824	-81.68819	119.232	171.9174	-0.026611	-0.035401	0.089112	21.1912	-2.61	1725.6933	NaN	NaN	NaN
1.744	-19.258	94.076	475.741	-0.21387	0.33398	-0.36865	-29.732	32.9465	22.9305	0.16797	0.12646	0.068848	-86.321	121.0112	142.797	-0.01123	-0.06543	0.11816	-1.597	16.755	1685.558	NaN	NaN	NaN
1.746	-17.234	93.934	485.479	-0.22053	0.3401	-0.37997	-25.881	-0.957999999999999	46.02	0.17383	0.13965	0.07666	-62.298	130.9811	118.45	0.0029297	-0.092773	0.15576	36.377	6.177	1665.919	NaN	NaN	NaN
1.748	-18.435	87.215	501.753	-0.22507	0.34525	-0.38944	5.026	78.708	10.616	0.18116	0.14526	0.082519	-65.661	122.66	153.0392	0.0087891	-0.095215	0.1748	37.8651	13.165	1683.062	NaN	NaN	NaN
1.75	-9.496	81.757	506.595	-0.2311	0.35621	-0.40696	-30.828	30.7151	24.1579	0.19189	0.146	0.091309	-39.437	109.952	133.412	0.0048828	-0.09082	0.19238	84.466	-15.668	1716.9595	NaN	NaN	NaN
1.752	-19.05	83.629	504.747	-0.24218	0.36421	-0.42016	-50.249	34.5484	26.6565	0.19922	0.1416	0.10303	-52.003	84.64	118.4382	0.021484	-0.082032	0.20752	64.565	6.4002	1718.729	NaN	NaN	NaN
1.754	-35.977	85.954	532.41	-0.24658	0.37158	-0.43701	-20.038	54.463	13.012	0.20459	0.13525	0.10889	-11.501	77.578	77.4998854	0.043457	-0.075195	0.22705	70.358	-41.833	1683.596	NaN	NaN	NaN
1.756	-3.009	87.83	543.578	-0.25998	0.37892	-0.4521	-54.581	10.563	8.08	0.21533	0.11865	0.12988	-27.167	43.1941	98.3105	0.066895	-0.056152	0.23682	89.793	-49.027	1646.989	NaN	NaN	NaN
1.758	-16.918	96.008	543.906	-0.27364	0.38639	-0.47196	-19.353	66.353	0.486000000000001	0.22656	0.10474	0.146	-14.847	36.024	99.926	0.082031	-0.045898	0.23828	68.094	-76.783	1645.786	NaN	NaN	NaN
1.76	-15.421	96.229	534.582	-0.28962	0.39296	-0.4925	-39.657	32.065	25.8151	0.22754	0.091309	0.15137	-36.446	31.9142	84.006	0.09375	-0.030273	0.24512	54.592	-62.217	1634.122	NaN	NaN	NaN
1.762	-21.96	81.755	556.291	-0.30496	0.40374	-0.51813	-79.2212	30.1208	20.3803	0.23193	0.069824	0.16846	25.88	60.3953	29.173	0.10669	-0.011963	0.25342	22.5123	-51.4681	1652.278	NaN	NaN	NaN
1.764	-3.029	81.326	574.265	-0.31787	0.41406	-0.5376	-48.065	69.438	2.963	0.23535	0.053711	0.17627	5.411	38.7849	20.9732	0.13477	-0.0039063	0.2666	36.939	-28.61	1649.262	NaN	NaN	NaN
1.766	-6.255	97.421	588.325	-0.33617	0.42977	-0.55297	-54.362	26.4577	31.0842	0.23389	0.037598	0.18262	-31.77	28.054	27.0547	0.14502	0.0058594	0.26953	-12.989	-19.245	1585.84	NaN	NaN	NaN
1.768	-0.165999999999997	94.343	579.009	-0.35439	0.43416	-0.57623	-44.405	69.856	24.1359	0.22241	0.022461	0.1831	-34.878	5.6616	49.9118	0.14941	0.0039063	0.26953	68.161	-29.37	1527.276	NaN	NaN	NaN
1.77	-15.102	98.832	595.548	-0.36941	0.44023	-0.59401	-48.596	47.396	45.4292	0.2168	0.0058594	0.18164	-12.972	42.0383	19.4288	0.17627	0.0087891	0.27588	41.608	25.769	1432.247	NaN	NaN	NaN
1.772	-9.03	105.804	606.185	-0.39048	0.44499	-0.60923	-54.824	26.3273	66.3945	0.2085	0.0068359	0.18164	-24.058	55.218	3.154	0.18482	0.0075684	0.2771	14.932	44.758	1386.606	NaN	NaN	NaN
1.774	-23.825	118.873	603.48	-0.40918	0.45508	-0.62793	-44.281	70.298	25.6231	0.20117	0.0039063	0.17822	-12.539	76.243	-5.979	0.19434	0.0024414	0.28125	-21.605	136.6869	1346.829	NaN	NaN	NaN
1.776	-4.367	117.491	609.898	-0.42056	0.46173	-0.64646	-59.0123	17.2535	44.813	0.19678	0.015137	0.16895	-50.26	36.148	6.566	0.20215	0	0.27734	-44.181	135.1602	1331.9235	NaN	NaN	NaN
1.778	-19.069	104.953	626.761	-0.42854	0.47374	-0.6602	-35.322	43.8872	43.738	0.19141	0.024658	0.15503	-68.295	66.8744	-2.9872	0.21533	-0.0014648	0.28369	-47.951	171.025	1295.6383	NaN	NaN	NaN
1.78	3.249	107.579	625.686	-0.43876	0.48152	-0.67912	-52.327	32.5054	22.84855	0.18213	0.037109	0.13965	-67.7011	44.7188	4.95773	0.24951	-0.0068359	0.28564	-25.463	166.7988	1233.729	NaN	NaN	NaN
1.782	-12.738	112.97	627.862	-0.44213	0.49583	-0.69861	-48.143	8.95	21.6731	0.16846	0.066895	0.11621	-53.4971	75.5748	16.0185	0.29004	-0.0029297	0.2854	-26.592	196.461	1180.127	NaN	NaN	NaN
1.784	-4.38500000000001	112.412	645.437	-0.44385	0.50928	-0.71436	-17.472	69.092	6.053	0.15796	0.088623	0.093505	-59.4316	19.858	38.002	0.32617	-0.0053711	0.27441	-90.529	218.774	1141.478	NaN	NaN	NaN
1.786	13.237	119.381	658.638	-0.44766	0.51564	-0.7366	-59.3831	28.67321	33.0911	0.14404	0.11621	0.071777	-77.255	52.629	29.243	0.36572	-0.0092773	0.27002	-102.5201	247.022	1132.864	NaN	NaN	NaN
1.788	5.417	116.593	662.04	-0.44316	0.52345	-0.75397	-29.85	32.2963	48.723	0.13135	0.16406	0.041992	-91.21706	26.483	14.288	0.40283	-0.016602	0.27393	-107.398	275.778	1084.449	NaN	NaN	NaN
1.79	3.33	123.257	661.935	-0.4416	0.5309	-0.77116	-21.043	44.279	51.398	0.12939	0.18848	0.03125	-72.101	75.39295	15.068	0.44824	-0.016602	0.26123	-66.598	238.127	1026.084	NaN	NaN	NaN
1.792	-9.82600000000001	135.051	666.298	-0.4367	0.53359	-0.78227	-28.371	19.3836	48.595	0.12646	0.24023	0.0073242	-66.484	28.09755	33.4766	0.46655	-0.036621	0.25317	-59.203	223.2961	997.092	NaN	NaN	NaN
1.794	7.88499999999999	138.551	676.753	-0.43115	0.5415	-0.80225	-4.523	64.441	30.2549	0.13134	0.27295	-0.019287	-94.6388	49.9086	55.742	0.47949	-0.045898	0.24365	-66.245	181.608	996.2605	NaN	NaN	NaN
1.796	6.72	132.807	688.534	-0.42862	0.54131	-0.81806	-13.005	29.66	41.8011	0.13477	0.30713	-0.041504	-93.664	25.414	47.9525	0.48535	-0.070801	0.23633	-108.1124	227.468	965.0787	NaN	NaN	NaN
1.798	-6.078	137.406	690.061	-0.4293	0.54844	-0.82929	-52.469	25.2156	33.8404	0.14697	0.33789	-0.071777	-54.3655	77.041	49.9851	0.47314	-0.086914	0.23584	-62.665	252.9535	929.203	NaN	NaN	NaN
1.8	-3.819	136.423	697.235	-0.43125	0.5496	-0.84296	-7.904	53.2172	-1.094	0.1582	0.35156	-0.077637	-50.1196	36.661	67.8574	0.44873	-0.10254	0.22754	-114.0273	294.0369	886.909	NaN	NaN	NaN
1.802	14.853	136.867	693.94	-0.43526	0.54912	-0.85907	-22.344	-1.292	21.6978	0.16113	0.36768	-0.10547	-59.225	54.3223	74.791	0.41382	-0.11158	0.21655	-90.219	242.1562	863.756	NaN	NaN	NaN
1.804	-0.805000000000007	146.47	708.748	-0.43604	0.54883	-0.87109	-49.132	31.1161	11.245	0.15869	0.40723	-0.14307	-55.989	8.417	57.06	0.37451	-0.11377	0.20947	-66.78	220.7074	806.5396	NaN	NaN	NaN
1.806	-15.562	154.133	713.721	-0.43925	0.55215	-0.88789	-31.394	10.2475	36.8931	0.14697	0.44629	-0.19043	-52.676	51.7363	31.016	0.32715	-0.098633	0.19727	-75.343	216.8163	742.842	NaN	NaN	NaN
1.808	-0.196000000000012	161.057	705.679	-0.44248	0.55811	-0.9003	-32.772	8.573	48.09	0.12549	0.48584	-0.2124	-15.093	31.30737	17.295	0.30225	-0.089844	0.18555	-82.299	232.6	702.4496	NaN	NaN	NaN
1.81	15.879	153.195	708.825	-0.43935	0.56357	-0.91592	-32.135	56.169	13.807	0.11572	0.49414	-0.21191	1.759	53.071	51.99866	0.26367	-0.058105	0.16748	-85.6057	260.231	650.4582	NaN	NaN	NaN
1.812	-6.67299999999999	178.028	694.718	-0.43603	0.56807	-0.93038	-44.592	5.518	35.4142	0.083008	0.53516	-0.23193	4.744	12.14583	46.326	0.23779	-0.029785	0.15039	-73.91	242.571	621.187	NaN	NaN	NaN
1.814	-8.246	164.368	715.619	-0.43115	0.57861	-0.9458	-37.7	28.34779	37.8359	0.053956	0.54541	-0.24682	-22.223	43.613	36.669	0.21631	0.0043945	0.13623	-90.4943	244.3632	547.9229	NaN	NaN	NaN
1.816	2.169	165.035	726.938	-0.42901	0.58457	-0.95635	-54.348	18.013	33.253	0.029785	0.56055	-0.27686	-12.749	16.884	-1.4887	0.18994	0.039551	0.11865	-23.333	190.2861	517.15	NaN	NaN	NaN
1.818	5.67699999999999	161.554	724.875	-0.4249	0.58994	-0.97607	-68.649	-4.712	52.945	-0.023438	0.58643	-0.35303	-15.991	33.949	27.1324	0.18262	0.053223	0.11133	-44.632	195.3752	482.1787	NaN	NaN	NaN
1.82	-16.432	171.92	728.06	-0.42373	0.60244	-0.9792	-34.309	45.256	71.976	-0.054688	0.59033	-0.38818	-16.719	-3.3122	51.2499	0.15967	0.080566	0.095703	-37.114	194.8659	432.8197	NaN	NaN	NaN
1.822	-11.679	176.628	730.778	-0.4249	0.61553	-0.99131	-67.8177	15.133	130.099	-0.12939	0.57764	-0.45361	-28.172	10.6266	73.512	0.14526	0.1023	0.087158	-46.321	228.531	397.791	NaN	NaN	NaN
1.824	-20.321	181.446	739.052	-0.42725	0.62744	-0.99561	-72.987	46.97	197.842	-0.20191	0.55639	-0.50171	-7.961	-1.841	28.226	0.12842	0.11865	0.085449	-48.995	195.049	364.1111	NaN	NaN	NaN
1.826	12.445	194.681	727.772	-0.43447	0.63887	-1.0018	-75.935	55.5188	257.949	-0.30908	0.54346	-0.58008	-19.18	32.9375	16.2093	0.10156	0.1333	0.075195	-73.156	169.0236	313.228	NaN	NaN	NaN
1.828	4.59099999999999	195.986	730.893	-0.44014	0.65185	-1.0101	-110.125	28.608	370.834	-0.47705	0.53662	-0.68018	-26.554	16.235	-9.1192	0.088867	0.14453	0.069336	-27.669	121.397	288.398	NaN	NaN	NaN
1.83	-12.544	197.171	729.192	-0.44365	0.66162	-1.0159	-58.171	68.046	489.689	-0.5874	0.53662	-0.73389	-60.111	23.51426	8.4765	0.070313	0.16113	0.055664	-31.001	95.534	260.286	NaN	NaN	NaN
1.832	-19.216	193.681	734.75	-0.4458	0.67324	-1.0166	-66.738	53.495	673.788	-0.83154	0.57861	-0.82764	-29.613	31.109	-9.54972	0.06543	0.16455	0.054687	-70.6457	143.455	232.731	NaN	NaN	NaN
1.834	6.973	194.373	721.376	-0.45557	0.67773	-1.0234	-88.707	65.8778	833.443	-1.0454	0.64942	-0.91651	-45.116	57.278	-0.271000000000001	0.0625	0.17139	0.049805	-64.765	145.20155	226.3628	NaN	NaN	NaN
1.836	7.93299999999999	201.013	729.808	-0.45801	0.6875	-1.018	-41.163	93.971	947.045	-1.2671	0.74658	-1.0122	-33.366	58.7212	12.5464	0.063965	0.18262	0.041016	-90.497	163.9858	201.4869	NaN	NaN	NaN
1.838	-11.87	203.213	730.774	-0.46875	0.69434	-1.018	-88.9258	61.929	1113.003	-1.5371	0.93066	-1.0898	-79.0764	34.3375	36.456	0.0625	0.18945	0.036621	-77.604	141.4673	152.103	NaN	NaN	NaN
1.84	-5.83300000000001	213.074	725.371	-0.47383	0.7041	-1.0089	-97.312	92.288	1191.708	-1.6294	1.061	-1.1128	-91.0373	37.409	7.605	0.069824	0.20166	0.026855	-33.865	135.811	114.349	NaN	NaN	NaN
1.842	-4.157	211.938	733.131	-0.4791	0.71426	-1.006	-98.259	58.731	1284.0661	-1.7539	1.3672	-1.1895	-102.8428	59.4952	24.1486	0.07959	0.21435	0.020019	-32.397	129.0925	105.46	NaN	NaN	NaN
1.844	-12.195	213.884	714.53	-0.48877	0.72314	-1.0015	-118.647	36.907	1343.589	-1.7475	1.5572	-1.2382	-62.795	86.42413	20.1748	0.086426	0.2251	0.00097656	-59.41	155.5877	92.438	NaN	NaN	NaN
1.846	-11.938	205.122	738.013	-0.49766	0.73086	-0.99531	-110.256	62.378	1302.279	-1.6382	1.6841	-1.269	-74.253	60.217	43.4691	0.092773	0.24805	-0.0048828	-52.905	156.3629	119.1352	NaN	NaN	NaN
1.848	-20.776	205.529	722.162	-0.50225	0.73565	-0.98603	-106.479	-11.1033	1291.597	-1.3354	1.7095	-1.2397	-68.807	61.6132	35.3924	0.099609	0.25391	-0.018066	-115.662	144.094	94.4311	NaN	NaN	NaN
1.85	-0.319000000000003	204.898	724.703	-0.49912	0.7419	-0.97744	-108.7748	-27.6022	1257.728	-1.147	1.6802	-1.1978	-88.2931	30.0269	41.6357	0.099121	0.27148	-0.037598	-83.6699	112.92329	83.13587	NaN	NaN	NaN
1.852	-9.167	211.829	707.251	-0.50127	0.74228	-0.97197	-106.7238	-36.99	1216.075	-0.80811	1.5669	-1.1069	-56.3926	63.2825	26.949	0.096435	0.28711	-0.0542	-34.619	95.393	65.9958	NaN	NaN	NaN
1.854	-13.784	206.068	698.862	-0.50732	0.74072	-0.9624	-91.2285	-65.9336	1237.202	-0.67383	1.457	-1.0537	-48.335	26.25	58.2614	0.097168	0.30225	-0.066895	-53.627	107.112	50.72	NaN	NaN	NaN
1.856	-5.568	205.623	699.698	-0.51543	0.73946	-0.95137	-37.075	-36.04876	1235.708	-0.62354	1.3403	-1.0229	-44.398	32.701	42.8855	0.089355	0.32178	-0.095215	-80.179	96.475	55.082	NaN	NaN	NaN
1.858	-14.109	208.965	688.87	-0.53008	0.74023	-0.94199	-83.9245	-107.072	1279.398	-0.68262	1.1875	-1.002	-65.145	5.105	39.359	0.082031	0.33008	-0.10596	-75.0113	101.191	68.4935	NaN	NaN	NaN
1.86	-13.606	212.609	691.983	-0.54883	0.74219	-0.93066	-76.03	-144.851	1287.8523	-0.75146	1.1333	-1.0034	-26.096	53.06258	26.009	0.086914	0.33936	-0.13574	-83.1733	63.298	76.63	NaN	NaN	NaN
1.862	-29.227	200.007	694.938	-0.56201	0.74717	-0.92276	-56.351	-159.657	1274.2527	-0.92236	1.061	-1.0015	-24.028	41.198	50.91918	0.085693	0.35718	-0.16113	-51.56303	25.7431	67.3754	NaN	NaN	NaN
1.864	-17.355	183.732	690.969	-0.57422	0.75586	-0.91309	-106.526	-193.795	1296.909	-1.0623	1.0471	-1.0212	-34.212	82.713	59.051	0.090332	0.37012	-0.19141	0.297000000000004	-19.798	64.643	NaN	NaN	NaN
1.866	-36.052	180.1108	693.389	-0.58008	0.7668	-0.90742	-87.806	-130.948	1324.959	-1.1851	1.0669	-1.0698	-27.14	26.6945	65.311	0.085449	0.37646	-0.22998	-29.763	-4.028	63.5981	NaN	NaN	NaN
1.868	-24.62	173.119	694.62	-0.57461	0.78262	-0.90371	-101.8282	-150.25	1383.456	-1.3047	1.125	-1.1494	-28.257	54.39	47.287	0.095459	0.39624	-0.25439	-34.263	20.8626	77.508	NaN	NaN	NaN
1.87	-34.451	172.553	692.01	-0.575	0.79395	-0.90566	-134.0762	-189.381	1393.745	-1.3472	1.1587	-1.188	-27.512	22.6456	51.79359	0.1001	0.42578	-0.27002	-57.766	44.048	67.627	NaN	NaN	NaN
1.872	-21.475	165.618	694.81	-0.57266	0.81172	-0.90527	-91.2847	-210.354	1367.261	-1.4043	1.2266	-1.2705	12.912	60.574	48.31851	0.089355	0.46582	-0.29883	-41.97	25.3629	49.948	NaN	NaN	NaN
1.874	-43.978	165.423	707.45	-0.57227	0.82617	-0.90039	-63.111	-333.813	1400.2924	-1.4307	1.2745	-1.3331	-9.651	3.28745	42.6861	0.090332	0.4834	-0.31299	-36.884	-12.8445	10.99892	NaN	NaN	NaN
1.876	-36.267	164.39	743.65	-0.5747	0.84834	-0.90088	-70.522	-331.054	1421.6837	-1.4478	1.3169	-1.3862	-8.01	35.9094	27.4125	0.088379	0.51953	-0.34277	-20.424	-3.401	8.9515	NaN	NaN	NaN
1.878	-36.727	170.1563	783.96	-0.58399	0.86601	-0.89844	-55.419	-328.1	1465.6239	-1.4585	1.3599	-1.4448	-13.95	-33.585	25.95	0.080566	0.5415	-0.36353	-22.459	0.4271	10.583	NaN	NaN	NaN
1.88	-10.536	177.844	813.09	-0.59219	0.88359	-0.88555	-62.927	-334.713	1472.96855	-1.4644	1.3755	-1.4604	-18.062	18.998	54.713	0.071777	0.56055	-0.38672	-34.503	43.6285	19.033	NaN	NaN	NaN
1.882	-8.477	191.434	886.88	-0.60899	0.89199	-0.88223	9.94	-265.2537	1467.341	-1.4844	1.4063	-1.4961	-48.535	-13.5628	100.9736	0.036621	0.5835	-0.42139	-46.529	37.399	14.891	NaN	NaN	NaN
1.884	1.933	203.168	966.9	-0.62646	0.90283	-0.87939	11.489	-300.688	1555.3106	-1.5151	1.4311	-1.5063	-34.807	34.326	151.0558	0.017578	0.58398	-0.44043	-62.3002	50.682	-1.68876	NaN	NaN	NaN
1.886	20.188	213.941	1024.9	-0.65849	0.89443	-0.88682	-37.904	-264.654	1629.5607	-1.5605	1.46	-1.5215	-59.507	0.4203	212.7332	-0.04541	0.58252	-0.48584	-5.803	35.23167	-12.6575	NaN	NaN	NaN
1.888	21.0784	205.651	1087.9	-0.70107	0.88994	-0.89521	-72.433	-213.743	1655.534	-1.6519	1.5161	-1.5581	-97.584	51.833	311.3844	-0.11816	0.55957	-0.54053	-31.691	47.0911	-5.16152	NaN	NaN	NaN
1.89	6.596	197.978	1143.38	-0.76357	0.879	-0.89834	-117.92	-208.698	1701.6254	-1.707	1.5508	-1.5742	-107.6808	7.96	481.32	-0.21777	0.52979	-0.60693	-38.092	54.3933	17.82896	NaN	NaN	NaN
1.892	17.386	164.5361	1208.98	-0.84424	0.87529	-0.90127	-110.1	-96.716	1710.6864	-1.7988	1.6309	-1.6016	-149.892	48.08301	665.579	-0.3999	0.48486	-0.70264	-79.0708	67.316	-4.49	NaN	NaN	NaN
1.894	13.31	131.869	1264.07	-0.92969	0.87891	-0.91406	-101.989	-90.41	1718.943	-1.8545	1.6807	-1.6245	-116.65	5.008	817.188	-0.51758	0.46875	-0.75	-49.038	56.59	17.913	NaN	NaN	NaN
1.896	11.41	90.937	1301.19	-1.0022	0.89502	-0.91631	-100.899	-79.994	1711.6495	-1.9058	1.731	-1.644	-87.926	49.3983	987.094	-0.82031	0.46387	-0.83203	-57.497	27.346	-2.222	NaN	NaN	NaN
1.898	4.116	47.02	1326.89	-1.0644	0.92354	-0.92246	-90.693	-37.438	1704.07	-1.9277	1.7695	-1.6641	-103.989	32.1245	1135.63	-1.0947	0.51367	-0.86304	-40.974	28.974	15.4614	NaN	NaN	NaN
1.9	3.398	-12.32	1336.43	-1.1116	0.96299	-0.93066	-129.85864	-130.5673	1740.4455	-1.9331	1.7817	-1.6714	-169.3914	78.639	1280.041	-1.4043	0.58594	-0.90234	-62.726	19.6301	40.38801	NaN	NaN	NaN
1.902	-4.943	-68.286	1322.11	-1.1395	1.0058	-0.9332	-103.90851	-109.362	1756.827	-1.9077	1.7954	-1.6792	-172.4375	32.7541	1383.376	-1.834	0.74805	-0.94727	-73.5412	47.86	49.7183	NaN	NaN	NaN
1.904	5.16700000000001	-96.733	1290.42	-1.1504	1.0488	-0.92773	-92.6612	-138.14	1780.0996	-1.8591	1.7961	-1.6726	-186.3818	37.8072	1426.534	-2.0229	0.87744	-0.94482	-52.276	66.53	41.07558	NaN	NaN	NaN
1.906	-7.324	-125.166	1246.59	-1.1406	1.0914	-0.92226	-91.231	-148.728	1784.364	-1.8008	1.7988	-1.666	-156.367	-3.8675	1410.091	-2.4038	1.1919	-0.93506	-64.371	84.651	37.8556	NaN	NaN	NaN
1.908	-24.423	-141.378	1199.27	-1.1062	1.136	-0.89893	-55.059	-90.278	1765.198	-1.7051	1.7813	-1.666	-95.982	-8.83705	1431.474	-2.6089	1.5054	-1.0615	-57.799	65.775	46.322	NaN	NaN	NaN
1.91	4.511	-156.049	1154.01	-1.0468	1.1673	-0.87236	-117.635	-151.79	1813.983	-1.6558	1.7642	-1.6636	-83.9571	-52.8899	1402.924	-2.6304	1.813	-1.1929	-74.9033	56.4011	45.2578	NaN	NaN	NaN
1.912	-18.816	-160.289	1109.36	-0.95224	1.187	-0.83506	-161.4542	-89.511	1808.263	-1.5483	1.7446	-1.6245	-128.565	-67.0948	1405.88396	-2.3452	2.0591	-1.3413	-55.909	40.2675	57.6576	NaN	NaN	NaN
1.914	-33.784	-158.486	1075.58	-0.84033	1.1899	-0.79639	-169.822	-74.618	1785.7	-1.4768	1.7131	-1.5915	-99.2499	-89.1449	1407.40219	-2.0664	2.082	-1.3672	-57.779	56.0489	40.722	NaN	NaN	NaN
1.916	-53.288	-155.474	1053.02	-0.73008	1.1775	-0.7543	-153.574	-105.464	1773.386	-1.4194	1.6821	-1.5542	-50.277	-128.98	1395.85391	-1.3828	1.9082	-1.2891	-26.337	66.152	56.0756	NaN	NaN	NaN
1.918	-42.559	-146.953	1010.641	-0.64004	1.143	-0.70625	-142.7131	-36.666	1718.1141	-1.3511	1.6392	-1.5093	22.181	-175.616	1372.786	-0.98974	1.686	-1.207	-60.3419	52.73	48.468	NaN	NaN	NaN
1.92	-58.244	-122.295	985.714	-0.57481	1.1036	-0.65039	-144.131	-87.8783	1704.233	-1.3203	1.6113	-1.4902	20.451	-206.1455	1390.986	-0.7749	1.4536	-1.1245	-41.817	48.1833	45.276	NaN	NaN	NaN
1.922	-90.087	-108.238	964.679	-0.55244	1.054	-0.59346	-116.807	-51.256	1653.711	-1.2749	1.5649	-1.4565	15.942	-196.424	1429.234	-0.80127	1.1938	-1.0366	-43.082	33.349	45.547	NaN	NaN	NaN
1.924	-96.4077	-103.928	942.185	-0.56299	1.0015	-0.53076	-100.447	-0.314	1591.528	-1.2441	1.5322	-1.438	-68.2045	-185.99	1492.0885	-0.89648	1.1055	-1.0137	-46.427	33.1114	47.056	NaN	NaN	NaN
1.926	-101.143	-120.847	917.738	-0.60468	0.95996	-0.47871	-100.137	-28.746	1584.6326	-1.2148	1.5039	-1.4219	-66.751	-162.89	1497.821	-1.1733	0.98877	-0.99756	-43.467	6.443296	39.4915	NaN	NaN	NaN
1.928	-96.0771	-145.218	907.9936	-0.66797	0.92696	-0.43633	-75.487	44.248	1538.3482	-1.1895	1.4805	-1.4004	-5.167	-197.15	1461.4956	-1.3884	0.94654	-1.0124	-34.694	12.4044	33.1017	NaN	NaN	NaN
1.93	-100.326	-186.81	936.8078	-0.73242	0.90156	-0.41055	-74.474	-0.5802	1540.7484	-1.1758	1.4688	-1.3887	17.95	-214.309	1457.353	-1.5879	0.93945	-1.0605	-23.771	7.796	32.238	NaN	NaN	NaN
1.932	-98.729	-217.1565	940.8488	-0.7961	0.89726	-0.40479	-64.048	13.9195	1527.949	-1.1479	1.4478	-1.3687	-2.862	-252.197	1516.995	-1.7749	1.0005	-1.1577	-31	12.059	32.405	NaN	NaN	NaN
1.934	-94.371	-242.937	947.564	-0.85645	0.90039	-0.41406	-56.819	61.887	1472.698	-1.1284	1.4272	-1.3462	-17.687	-258.582	1566.285	-1.8335	1.0552	-1.2144	-16.571	-8.7371	39.0555	NaN	NaN	NaN
1.936	-106.598	-247.239	955.76	-0.89814	0.93193	-0.43721	-65.058	16.3225	1495.6336	-1.105	1.3989	-1.3208	17.517	-306.47	1602.4368	-1.9023	1.1641	-1.3203	-67.3666	-5.30503	19.0498	NaN	NaN	NaN
1.938	-113.706	-267.986	968.633	-0.93037	0.97626	-0.45713	-81.143	74.113	1458.8482	-1.0698	1.3618	-1.2866	72.3112	-334.89	1631.318	-1.9114	1.2249	-1.3767	-12.61	20.919	4.44131	NaN	NaN	NaN
1.94	-109.792	-275.492	1002.039	-0.95849	1.0372	-0.47588	-78.728	38.8638	1461.772	-1.0417	1.3289	-1.2605	79.2332	-364.126	1635.745	-1.9185	1.2739	-1.4272	-9.245	32.801	5.0265	NaN	NaN	NaN
1.942	-107.434	-265.016	1004.8226	-0.98076	1.1124	-0.4916	-82.863	26.9119	1441.6452	-1.0117	1.2881	-1.2363	74.53622	-333.663	1668.09305	-1.9194	1.3149	-1.4614	-51.151	56.7013	27.5169	NaN	NaN	NaN
1.944	-121.362	-245.45	1016.988	-1.0039	1.1816	-0.50635	-53.793	72.896	1383.149	-0.98633	1.2383	-1.1973	51.0259	-300.128	1704.74	-1.9253	1.3325	-1.4604	-69.748	35.709	1.724	NaN	NaN	NaN
1.946	-146.543	-224.4936	1034.061	-1.0287	1.2486	-0.51885	-52.04	11.94	1389.5955	-0.96826	1.2134	-1.1792	-15.148	-236.907	1777.124	-1.939	1.356	-1.4683	-39.601	49.7386	1.043	NaN	NaN	NaN
1.948	-139.7	-215.7108	1061.3981	-1.0547	1.3133	-0.53828	-58.425	70.99	1336.718	-0.93945	1.1748	-1.1494	-35	-220.5939	1814.34	-1.9587	1.382	-1.4656	-53.475	47.949	-3.523	NaN	NaN	NaN
1.95	-154.313	-190.66	1071.2178	-1.0844	1.3743	-0.56172	-63.988	71.424	1294.2844	-0.90942	1.1408	-1.1208	-77.399989	-172.786	1846.61	-1.9839	1.4058	-1.4614	-57.5359	59.3764	-0.567	NaN	NaN	NaN
1.952	-147.472	-146.851	1052.863	-1.1067	1.4253	-0.5747	-61.218	73.539	1284.006	-0.88379	1.1143	-1.0938	-85.039	-136.738	1803.108	-2.0425	1.4526	-1.4878	-33.276	51.776	32.5736	NaN	NaN	NaN
1.954	-139.982	-142.204	1062.1059	-1.1328	1.4688	-0.58984	-59.224	140.135	1251.5185	-0.84717	1.0669	-1.0503	-117.386	-81.626	1783.793	-2.0801	1.4824	-1.5078	-89.2751	67.943	24.36049	NaN	NaN	NaN
1.956	-120.673	-117.687	1077.878	-1.1473	1.5031	-0.59912	-61.189	111.513	1253.354	-0.83496	1.043	-1.0332	-81.248	-61.105	1778.79	-2.1563	1.5645	-1.543	-68.702	58.546	30.962	NaN	NaN	NaN
1.958	-117.421	-116.512	1088.4985	-1.145	1.5262	-0.60576	-39.344	176.155	1181.914	-0.8042	1.0034	-0.99463	-94.56	-35.851	1812.3138	-2.2078	1.6292	-1.5739	-65.1867	58.338	28.4916	NaN	NaN	NaN
1.96	-122.272	-103.876	1073.236	-1.12	1.5388	-0.62373	-70.6537	204.702	1116.357	-0.78345	0.969	-0.96362	-47.871	-40.0563	1816.149	-2.2363	1.6934	-1.5996	-33.992	45.3442	33.9753	NaN	NaN	NaN
1.962	-102.539	-136.7653	1072.9849	-1.0801	1.5348	-0.64531	-108.432	194.417	1101.036	-0.76172	0.93945	-0.93164	-40.176	-52.737	1844.272	-2.2109	1.7578	-1.623	-58.11	50.5945	39.13867	NaN	NaN	NaN
1.964	-94.655	-146.093	1079.2142	-1.0146	1.5156	-0.6582	-98.1701	237.581	1041.956	-0.72363	0.88672	-0.89453	-42.5677	-74.5201	1818.683	-2.1675	1.772	-1.6284	-59.392	68.7526	56.62133	NaN	NaN	NaN
1.966	-114.836	-156.5879	1092.0085	-0.94199	1.4807	-0.65683	-92.7992	176.6197	1028.2606	-0.70313	0.86523	-0.87305	-79.291	-70.122	1850.774	-2.0195	1.7656	-1.6113	-75.7175	49.821	58.8371	NaN	NaN	NaN
1.968	-116.989	-152.7817	1067.74	-0.87334	1.4273	-0.65459	-76.105	174.75912	972.6247	-0.6582	0.81836	-0.83594	-73.701	-38.6248	1846.17677	-1.8867	1.7275	-1.5908	-50.7107	43.8759	62.1395	NaN	NaN	NaN
1.97	-122.82	-161.8421	1071.367	-0.81006	1.3788	-0.62959	-28.081	176.8054	927.843	-0.61523	0.78222	-0.80518	-68.295	-5.868	1852.854	-1.7632	1.6685	-1.5503	-40.075	30.6717	45.0868	NaN	NaN	NaN
1.972	-119.846	-168.485	1067.754	-0.76103	1.3356	-0.60615	-66.04228	141.664	927.5599	-0.58203	0.75098	-0.7793	-59.612	-3.9458	1826.107	-1.6382	1.5649	-1.4985	-47.355	42.7284	54.459	NaN	NaN	NaN
1.974	-148.9227	-165.021	1043.922	-0.7124	1.3052	-0.58447	-76.983	194.9015	845.926	-0.53516	0.69971	-0.7417	-115.213	-35.292	1814.462	-1.5898	1.5156	-1.4727	-28.929	42.874	49.7995	NaN	NaN	NaN
1.976	-144.756	-159.9141	1024.4437	-0.67324	1.283	-0.55605	-49.541	175.44	804.849	-0.51221	0.67725	-0.72559	-117.167	-53.266	1781.529	-1.5308	1.4399	-1.4312	-41.394	53.081	49.0247	NaN	NaN	NaN
1.978	-124.777	-141.631	972.927	-0.63965	1.2619	-0.53252	-32.862	181.4	757.459	-0.46729	0.62695	-0.68359	-101.4391	-39.103	1757.5147	-1.5037	1.3987	-1.406	-50.195	28.0072	36.974	NaN	NaN	NaN
1.98	-132.193	-116.0351	946.819	-0.59863	1.2443	-0.5126	-9.883	183.728	721.508	-0.43604	0.59229	-0.64648	-26.502	16.866	1701.4807	-1.4819	1.3579	-1.3882	-61.027	16.61856	50.51392	NaN	NaN	NaN
1.982	-129.43	-97.2481	938.573	-0.56992	1.2291	-0.49277	-26.374	140.263	729.4867	-0.40283	0.56104	-0.61768	-9.476	41.7681	1651.901	-1.4492	1.3242	-1.3691	-7.779	18.7704	74.5618	NaN	NaN	NaN
1.984	-112.864	-83.761	916.8424	-0.54102	1.2168	-0.47266	-16.306	191.141	687.1632	-0.36328	0.51318	-0.57617	22.486	64.396	1592.473	-1.4351	1.3091	-1.3628	-50.038	1.2072	88.591	NaN	NaN	NaN
1.986	-115.015	-69.833	898.095	-0.51406	1.1996	-0.45508	-21.875	193.966	645.582	-0.3374	0.49658	-0.56006	0.370999999999995	65.9094	1574.644	-1.4043	1.293	-1.3379	-26.076	31.7573	133.1022	NaN	NaN	NaN
1.988	-102.529	-43.237	871.3529	-0.49326	1.1844	-0.43877	-13.104	198.02	602.10987	-0.29639	0.45459	-0.53174	16.815	114.2675	1561.0322	-1.3799	1.2773	-1.3296	-42.097	21.0231	151.15	NaN	NaN	NaN
1.99	-113.499	-35.9	853.3537	-0.46475	1.1751	-0.41767	-7.131	226.078	537.1962	-0.26391	0.42163	-0.50244	25.193	133.546	1563.046	-1.3535	1.2578	-1.3086	-55.213	20.93628	227.3897	NaN	NaN	NaN
1.992	-109.536	-32.8347	840.017	-0.44912	1.1481	-0.40654	-36.804	183.7	507.4212	-0.22705	0.38867	-0.47461	42.1292	155.975	1536.3158	-1.312	1.2261	-1.2905	-74.023	-0.1051	369.697	NaN	NaN	NaN
1.994	-113.215	-46.5734	814.3453	-0.42285	1.127	-0.39551	6.135	203.236	453.639	-0.18164	0.34717	-0.43799	-8.998	112.374	1515.14	-1.293	1.1992	-1.2773	-77.107	16.1327	585.611	NaN	NaN	NaN
1.996	-126.286	-40.285	781.379	-0.39853	1.1138	-0.3836	-4.684	194.467	433.25	-0.16748	0.32373	-0.42139	-21.069	129.577	1470.8107	-1.2769	1.1548	-1.2437	-107.418	19.6679	788.652	NaN	NaN	NaN
1.998	-102.63	-51.9238	760.529	-0.37353	1.0871	-0.37519	-43.561	165.449	437.5127	-0.12891	0.27734	-0.39063	-40.704	118.182	1433.032	-1.2786	1.1169	-1.2146	-64.046	12.4988	977.246	NaN	NaN	NaN
2	-98.404	-60.0264	759.661	-0.34971	1.0625	-0.36309	6.256	164.141	402.116	-0.10791	0.2539	-0.37793	-34.472	167.116	1383.9302	-1.2847	1.0806	-1.186	-86.744	-4.5796	1190.754	NaN	NaN	NaN
2.002	-78.289	-65.0804	761.7961	-0.3292	1.0357	-0.35195	-16.155	142.8723	379.0996	-0.084473	0.22412	-0.3584	-29.015	142.449	1347.878	-1.2891	1.0391	-1.1484	-165.484	-11.213	1400.191	NaN	NaN	NaN
2.004	-90.977	-58.1174	742.7833	-0.31152	1.0127	-0.34033	-34.994	164.6603	333.2778	-0.056152	0.17871	-0.31494	-8.662	170.1968	1302.983	-1.2827	1.02	-1.1284	-126.625	-9.641	1570.652	NaN	NaN	NaN
2.006	-78.281	-50.1755	719.853	-0.2916	0.98105	-0.32871	-34.564	179.072	322.107	-0.047852	0.15967	-0.30615	-19.1212	142.263	1263.988	-1.2559	0.98438	-1.0947	-140.295	-36.154	1675.9461	NaN	NaN	NaN
2.008	-84.756	-46.1858	719.236	-0.271	0.94991	-0.31963	-59.258	157.237	336.534	-0.025391	0.11328	-0.28174	2.842	213.742	1253.9011	-1.2136	0.95557	-1.0647	-169.657	-66.326	1684.56	NaN	NaN	NaN
2.01	-83.24	-31.153	682.135	-0.25341	0.92217	-0.30986	-57.21	169.515	305.918	-0.0097654	0.088135	-0.25708	-14.345	180.382	1240.89	-1.166	0.91895	-1.0352	-175.03678	-120.924	1642.977	NaN	NaN	NaN
2.012	-74.689	-16.5378	659.356	-0.23164	0.88906	-0.30127	-58.7855	127.57	294.964	0	0.059082	-0.23584	-8.529	232.006	1191.77	-1.0952	0.87549	-1.0015	-83.8245	-118.182	1622.86	NaN	NaN	NaN
2.014	-77.427	-2.5482	631.0585	-0.21045	0.85693	-0.29248	-50.8277	97.803	276.028	0.003418	0.041992	-0.23486	-23.065	216.379	1141.669	-1.055	0.83471	-0.96655	-161.038	-130.373	1579.193	NaN	NaN	NaN
2.016	-86.295	-10.3511	612.9353	-0.19512	0.83067	-0.29141	-64.8495	97.2081	242.2958	0.0087891	0.026367	-0.21875	-34.3682	287.944	1052.2957	-1.0151	0.79834	-0.94287	-134.933	-137.245	1596.707	NaN	NaN	NaN
2.018	-87.708	8.38614	587.2252	-0.18008	0.79766	-0.27862	-85.0166	94.027	235.738	0.02002	0.020996	-0.20215	-38.59511	266.697	1025.72	-0.9668	0.74707	-0.88867	-64.2842	-231.08	1534.521	NaN	NaN	NaN
2.02	-97.727	7.2227	561.3657	-0.16797	0.76602	-0.27666	-59.084	119.4292	178.2628	0.029541	0.0056153	-0.19287	-23.144	311.06	992.148	-0.94336	0.71875	-0.86719	-9.766	-277.79	1489.9238	NaN	NaN	NaN
2.022	-98.093	13.98944	538.6399	-0.15449	0.73819	-0.2667	-79.2037	112.3562	150.869	0.03418	0.0014648	-0.18115	-68.4874	242.868	948.5376	-0.89453	0.6709	-0.81445	20.081	-323.276	1487.8513	NaN	NaN	NaN
2.024	-92.394	11.7955	514.50681	-0.13965	0.70996	-0.25977	-61.565	100.013	153.8075	0.04541	-0.0053711	-0.16406	-75.8192	281.939	880.7725	-0.86963	0.63037	-0.79052	-13.4979	-295.0882	1531.5076	NaN	NaN	NaN
2.026	-91.312	21.0434	495.15642	-0.12842	0.68222	-0.24961	-48.848	84.6432	136.41371	0.049316	-0.00048828	-0.15918	-51.1269	225.551	822.257	-0.82959	0.58252	-0.76611	-51.16	-237.46	1608.0873	NaN	NaN	NaN
2.028	-103.629	22.1178	476.2621	-0.11895	0.65352	-0.23984	-88.2189	73.817	121.7589	0.059082	0.00097656	-0.14746	-41.0721	275.2793	776.029	-0.76563	0.52539	-0.72314	-92.6716	-172.48	1616.469	NaN	NaN	NaN
2.03	-90.117	5.40754	468.3719	-0.1084	0.62852	-0.23359	-26.548	98.57	88.8043	0.05542	0.015137	-0.14649	-16.663	238.891	756.0277	-0.73438	0.49609	-0.69727	-28.327	-183.86	1633.3205	NaN	NaN	NaN
2.032	-100.839	13.8852	441.4675	-0.094726	0.59483	-0.21777	-44.03	109.731	76.885	0.068359	0.02002	-0.12744	15.634	303.8651	731.347	-0.67041	0.44385	-0.65967	-18.2394	-211.27	1611.552	NaN	NaN	NaN
2.034	-104.389	20.277	412.125	-0.087402	0.56104	-0.2085	-78.437	93.74716	82.1554	0.085449	0.024414	-0.11768	24.97	268.201	671.025	-0.62866	0.40405	-0.63647	2.533	-259.492	1661.2146	NaN	NaN	NaN
2.036	-115.379	19.756	408.9266	-0.077148	0.53125	-0.20059	-27.247	80.804	62.0176	0.094238	0.024414	-0.10596	12.409	309.7486	616.2688	-0.57129	0.35742	-0.61719	-22.945	-276.2854	1665.19	NaN	NaN	NaN
2.038	-98.54	21.04	400.5296	-0.065332	0.50068	-0.18721	-52.321	60.4984	53.4337	0.104	0.02002	-0.098633	-2.259	224.944	577.738	-0.48242	0.29883	-0.57422	-22.191	-312.133	1698.8445	NaN	NaN	NaN
2.04	-103.578	31.62112	384.9275	-0.058692	0.47217	-0.17823	-35.935	38.188	51.4032	0.1167	0.010498	-0.07959	-17.484	266.3459	576.562	-0.43799	0.27441	-0.55566	42.445	-380.417	1711.48	NaN	NaN	NaN
2.042	-92.891	50.2628	365.22956	-0.050684	0.44131	-0.17051	-3.7	43.7937	42.0128	0.125	0	-0.071777	-0.0919999999999987	216.7373	555.614	-0.37451	0.2168	-0.50342	88.86	-410.34	1706.14	NaN	NaN	NaN
2.044	-103.617	34.009	369.0245	-0.041992	0.40283	-0.16064	-41.458	31.167	46.8329	0.13574	-0.019531	-0.049805	18.06	280.864	517.5971	-0.3374	0.16967	-0.46875	141.444	-443.08	1730.661	NaN	NaN	NaN
2.046	-95.145	39.9672	361.9964	-0.032812	0.37393	-0.15302	-11.489	40.6573	-10.4607	0.14111	-0.02832	-0.038574	7.845	197.985	443.2792	-0.30908	0.12109	-0.43701	110.029	-419.69	1806.933	NaN	NaN	NaN
2.048	-97.39	28.2184	351.1505	-0.028809	0.34472	-0.14121	1	23.9133	-4.159	0.15137	-0.044922	-0.025391	-47.751	217.195	392.67307	-0.27588	0.065918	-0.39502	77.586	-377.819	1885.0194	NaN	NaN	NaN
2.05	-89.742	47.5126	322.73	-0.027637	0.31621	-0.13965	-19.77	5.762	19.6266	0.1543	-0.055664	-0.014405	-58.222	153.987	364.5098	-0.25977	0.035645	-0.37891	-39.662	-288.774	1927.99	NaN	NaN	NaN
2.052	-87.924	31.2034	320.148	-0.030469	0.29248	-0.13252	-25.499	8.08655	30.8288	0.15479	-0.065918	-0.010254	-37.398	229.969	346.0493	-0.23047	-0.015137	-0.3418	-49.602	-210.796	1923.72	NaN	NaN	NaN
2.054	-78.966	34.3561	306.939	-0.030762	0.26953	-0.12207	-22.407	10.952	55.986	0.17188	-0.078613	0.0063477	1.017	181.6132	316.452	-0.20849	-0.052979	-0.31201	-91.894	-130.884	1890.7538	NaN	NaN	NaN
2.056	-58.37	45.7023	296.827	-0.033887	0.25127	-0.12061	-8.197	34.3094	34.0555	0.18164	-0.09082	0.023438	8.811	201.1915	309.505	-0.18848	-0.081055	-0.29199	-84.74	-92.271	1895.2251	NaN	NaN	NaN
2.058	-93.145	54.2091	292.4874	-0.032129	0.22939	-0.11348	-39.623	43.947	30.682	0.19824	-0.10498	0.034668	-22.523	127.617	280.35	-0.14893	-0.10742	-0.26953	-136.0308	-40.255	1869.901	NaN	NaN	NaN
2.06	-75.779	48.243	307.162	-0.037207	0.21182	-0.11348	-27.102	35.4708	36.4624	0.20923	-0.11743	0.038575	-51.257	171.254	256.963	-0.12305	-0.11475	-0.25684	-103.214	-5.003	1881.5725	NaN	NaN	NaN
2.062	-72.921	51.543	300.7477	-0.043457	0.19629	-0.11045	-43.62	52.541	4.833	0.22266	-0.12842	0.052734	-26.732	157.6266	247.336	-0.078613	-0.14844	-0.24219	-76.931	9.127	1853.179	NaN	NaN	NaN
2.064	-58.158	56.5059	299.517	-0.04834	0.18262	-0.11328	-55.941	54.92273	0.102300000000001	0.22412	-0.13916	0.04834	-59.021	195.803	228.535	-0.050293	-0.16601	-0.22656	-63.3049	6.549	1849.806	NaN	NaN	NaN
2.066	-67.873	60.8602	298.3556	-0.055176	0.1707	-0.1086	-6.215	44.0131	2.069	0.23877	-0.15186	0.063965	-59.244	127.923	218.787	-0.026367	-0.19043	-0.20801	-51.782	-30.29633	1853.618	NaN	NaN	NaN
2.068	-64.226	52.1522	286.3027	-0.06289	0.16426	-0.11445	-72.6774	44.172	17.808	0.229	-0.16553	0.052734	-75.622	142.864	195.218	-0.016602	-0.1958	-0.19775	-66.702	-35.597	1885.371	NaN	NaN	NaN
2.07	-55.678	53.12931	276.8946	-0.064062	0.15528	-0.11562	-79.0086	21.917	39.5625	0.22754	-0.1809	0.067871	-82.9444	102.472	148.30196	-0.01709	-0.20361	-0.20215	-99.032	-14.739	1894.809	NaN	NaN	NaN
2.072	-81.942	49.4707	271.5028	-0.065332	0.1501	-0.11767	-28.53	41.452	20.9803	0.22607	-0.19189	0.078613	-94.938	120.971	133.357	-0.022949	-0.21484	-0.19385	-161.552	-2.816	1862.5003	NaN	NaN	NaN
2.074	-73.146	47.7744	263.8468	-0.067871	0.14648	-0.12012	-66.864	46.1792	18.9223	0.21826	-0.20361	0.070801	-72.8972	58.123	126.7893	-0.034912	-0.20166	-0.19165	-179.647	-24.4252	1828.957	NaN	NaN	NaN
2.076	-64.669	37.64816	252.7883	-0.065332	0.14463	-0.12422	-78.5129	49.1936	11.4792	0.21143	-0.19922	0.072754	-101.725	61.864	118.5311	-0.050781	-0.19189	-0.19238	-214.147	-47.2516	1788.135	NaN	NaN	NaN
2.078	-68.444	49.8427	243.2137	-0.068066	0.14024	-0.12364	-50.962	47.68	24.2407	0.20557	-0.19922	0.059082	-71.994	57.22	72.1165	-0.070313	-0.17139	-0.18945	-187.164	-82.091	1809.223	NaN	NaN	NaN
2.08	-76.23	51.2734	241.1565	-0.067676	0.14024	-0.12754	-62.6351	25.959312	33.2985	0.20337	-0.19556	0.057617	-36.948	99.1806	41.848	-0.079102	-0.15283	-0.19678	-166.353	-73.492	1801.314	NaN	NaN	NaN
2.082	-80.126	56.5583	259.611	-0.073731	0.13554	-0.1332	-43.293	46.754	15.1343	0.2002	-0.18408	0.046387	-19.207	94.2907	40.522	-0.098145	-0.10303	-0.1958	-115.8815	-31.7027	1771.126	NaN	NaN	NaN
2.084	-81.964	52.3946	241.7241	-0.073242	0.13818	-0.13477	-50.1159	40.1756	40.9354	0.19482	-0.17236	0.036133	-52.235	81.255	66.536	-0.11182	-0.071045	-0.19946	-43.798	-3.8733	1671.9444	NaN	NaN	NaN
2.086	-70.663	64.5002	231.5705	-0.07207	0.13427	-0.13594	-48.921	23.341	46.4692	0.19092	-0.16504	0.030273	-56.021	67.0461	41.537	-0.12109	-0.040527	-0.20508	-22.887	42.496	1589.6435	NaN	NaN	NaN
2.088	-71.208	63.2332	220.366	-0.077051	0.13369	-0.13702	-35.852	35.3494	30.0319	0.1875	-0.15283	0.027832	-56.62	73.6305	20.1978	-0.12988	-0.003418	-0.1958	11.422	65.1782	1550.83	NaN	NaN	NaN
2.09	-93.31	66.203	242.042	-0.083301	0.12705	-0.13702	-29.25	33.4112	33.5176	0.18799	-0.13721	0.01416	-29.769	81.49	17.067	-0.12891	0.013672	-0.19141	-4.994	102.0843	1550.704	NaN	NaN	NaN
2.092	-67.638	66.97	241.522	-0.096387	0.12295	-0.13642	-30.285	56.375	1.2639	0.18994	-0.13623	0.015625	-49.112	57.065	50.38	-0.12305	0.039551	-0.18408	29.079	117.402	1512.761	NaN	NaN	NaN
2.094	-84.551	74.74	219.1914	-0.10205	0.11963	-0.12793	-30.355	54.933	33.88759	0.19141	-0.12793	0.0097656	-33.84	42.4617	40.92	-0.11597	0.040283	-0.17993	23.462	138.7797	1461.749	NaN	NaN	NaN
2.096	-82.158	69.331	236.6317	-0.10889	0.1208	-0.12608	-14.275	33.2595	49.041	0.19336	-0.11719	0.01001	-42.406	30.2871	11.8018	-0.10889	0.04248	-0.17334	10.017	149.3304	1395.624	NaN	NaN	NaN
2.098	-77.553	41.9582	253.0955	-0.11035	0.11572	-0.1293	-12.723	49.217	10.7901	0.19629	-0.11377	0.0053711	-23.152	64.39	-16.3489	-0.092285	0.044434	-0.15625	-42.9439	175.851	1355.6158	NaN	NaN	NaN
2.1	-69.805	39.0726	251.4606	-0.10566	0.11533	-0.13515	-51.8153	41.7664	20.2481	0.2002	-0.11035	0.0039063	-18.458	34.5967	-0.4442	-0.078613	0.040527	-0.15137	-32.029	195.141	1334.6135	NaN	NaN	NaN
2.102	-60.418	37.594	250.5307	-0.10019	0.1084	-0.14053	-2.058	35.2384	35.1906	0.20313	-0.11182	0.0039063	-13.54	37.83637	23.5128	-0.062988	0.020996	-0.14502	-39.694	202.859	1290.291	NaN	NaN	NaN
2.104	-75.538	58.04245	244.9479	-0.091797	0.098145	-0.15039	-22.766	36.2493	57.59075	0.20654	-0.11035	0.003418	-13.446	8.224	50.852	-0.045899	0.0075682	-0.12915	36.465	209.534	1247.523	NaN	NaN	NaN
2.106	-65.791	57.0736	253.5355	-0.079395	0.092969	-0.15899	-34.793	12.023	56.2	0.20191	-0.11353	0.0012207	4.97	57.3712	25.456	-0.02832	-0.0053711	-0.1167	55.628	186.874	1168.678	NaN	NaN	NaN
2.108	-65.586	54.6639	258.4366	-0.069629	0.07959	-0.16455	10.195	41.717	29.46	0.19678	-0.11914	0.0048828	-0.868000000000002	51.1249	39.665	-0.0024414	-0.023438	-0.10352	65.791	203.8473	1124.465	NaN	NaN	NaN
2.11	-39.843	56.76164	254.4434	-0.066113	0.074121	-0.16963	-35.13	37.3757	46.3234	0.18701	-0.12549	0.0029297	-28.966	69.9588	49.3953	0.01123	-0.03125	-0.092773	37.799	201.575	1110.8531	NaN	NaN	NaN
2.112	-70.348	54.4558	280.9939	-0.068262	0.068555	-0.17178	-25.657	23.8082	28.176	0.18359	-0.12256	0	-72.338	28.5897	65.6456	0.037109	-0.04248	-0.083496	-39.242	218.204	1112.456	NaN	NaN	NaN
2.114	-44.122	45.846	284.2799	-0.07666	0.064941	-0.17236	-26.345	29.7164	28.2596	0.16797	-0.12354	-0.00048828	-66.586	70.449	50.7739	0.053711	-0.054932	-0.074218	-15.817	214.164	1061.495	NaN	NaN	NaN
2.116	-51.865	56.283	294.144	-0.091601	0.066895	-0.16846	-52.282	11.421	32.621	0.15893	-0.12378	-0.0058594	-40.286	41.9179	59.932	0.075684	-0.062012	-0.064453	-7.723	217.789	988.786	NaN	NaN	NaN
2.118	-61.149	66.428	295.92	-0.10899	0.074219	-0.16777	-43.799	22.241	11.755	0.15332	-0.12451	-0.013184	-51.778	83.964	54.428	0.092773	-0.072754	-0.047363	-17.031	247.52	893.8524	NaN	NaN	NaN
2.12	-57.66	61.183	298.339	-0.125	0.087109	-0.17207	-49.045	18.213	44.548	0.146	-0.12012	-0.013184	-75.3481	10.5593	75.561	0.10352	-0.080078	-0.043457	-90.234	291.108	865.41	NaN	NaN	NaN
2.122	-60.734	56.1655	284.4246	-0.13965	0.1044	-0.17676	-55.296	0.457999999999998	50.1177	0.1377	-0.125	-0.016113	-91.5308	30.3956	34.0048	0.13721	-0.092285	-0.023926	-81.6219	336.507	827.5554	NaN	NaN	NaN
2.124	-50.633	61.7955	286.925	-0.14795	0.12158	-0.18945	-75.61357	37.2229	22.884	0.13574	-0.12549	-0.022461	-83.0018	-9.885	12.541	0.15405	-0.10107	-0.018554	-123.228	352.142	773.154	NaN	NaN	NaN
2.126	-77.935	52.3155	287.397	-0.15645	0.14277	-0.19287	-55.0159	34.1223	18.7531	0.12866	-0.12427	-0.028809	-52.951	41.0066	10.471	0.17578	-0.104	-0.012695	-79.806	333.153	701.1463	NaN	NaN	NaN
2.128	-54.254	51.2282	316.0367	-0.15801	0.1583	-0.19785	-50.652	43.336	5.1182	0.11914	-0.12891	-0.037598	-38.823	-9.073	44.19	0.22998	-0.12158	0.0087891	-58.506	273.534	629.634	NaN	NaN	NaN
2.13	-63.621	47.4155	321.5008	-0.15801	0.17119	-0.20215	-85.3011	49.742	12.8	0.10693	-0.12695	-0.046387	-42.297	35.8332	46.256	0.24756	-0.12793	0.014648	-57.8049	265.615	616.048	NaN	NaN	NaN
2.132	-69.012	62.39929	327.3939	-0.16143	0.18691	-0.2043	-50.979	21.834	25.8927	0.10498	-0.12891	-0.052734	-50.457	0.616999999999999	31.06206	0.26709	-0.13232	0.010742	-76.071	261.8598	584.203	NaN	NaN	NaN
2.134	-75.654	59.0642	332.6269	-0.16162	0.19482	-0.20459	-35.264	34.989	12.451	0.091797	-0.12988	-0.060059	-85.1443	53.258	5.7649	0.28443	-0.14526	0.011231	-78.548	281.60666	581.187	NaN	NaN	NaN
2.136	-86.274	70.581	349.9082	-0.16504	0.20283	-0.20752	-72.7498	34.199	16.313	0.086426	-0.13062	-0.06836	-55.5715	6.9656	49.4299	0.29736	-0.15723	0.01709	-84.30105	276.774	494.761	NaN	NaN	NaN
2.138	-58.97	72.2098	364.0558	-0.17334	0.21221	-0.20772	-25.946	27.0413	22.973	0.079102	-0.13623	-0.071777	-68.796	33.815	62.371	0.29199	-0.17236	0.017578	-63.691	245.2	434.291	NaN	NaN	NaN
2.14	-79.663	76.1045	358.6538	-0.18311	0.22315	-0.2128	-46.122	47.654	18.347	0.070801	-0.13184	-0.085449	-59.884	-4.5686	45.086	0.29639	-0.18018	0.018555	-21.043	234.38591	359.1889	NaN	NaN	NaN
2.142	-79.696	61.0992	368.6474	-0.19824	0.2332	-0.20889	-44.58	20.537	21.0298	0.070801	-0.13232	-0.092285	-47.77	56.269	-2.658	0.28027	-0.19043	0.021484	-63.141	215.8609	368.321	NaN	NaN	NaN
2.144	-94.811	50.56502	381.644	-0.21143	0.24658	-0.20361	-30.321	49.378	2.035	0.06543	-0.13037	-0.10791	-0.777000000000001	21.0718	-5.375	0.26269	-0.18774	0.020264	-17.998	213.084	371.406	NaN	NaN	NaN
2.146	-74.237	51.014	387.079	-0.22519	0.25703	-0.20752	-37.2281	47.722	13.9198	0.066894	-0.12524	-0.12329	-37.824	41.7481	6.649	0.25098	-0.18408	0.021484	-48.261	166.428	362.462	NaN	NaN	NaN
2.148	-88.636	56.6589	394.073	-0.24297	0.27246	-0.2082	-25.244	17.1449	35.316	0.062988	-0.12402	-0.13574	-27.702	3.862	-2.5956	0.23096	-0.16895	0.015137	-12.109	151.7507	307.797	NaN	NaN	NaN
2.15	-100.061	60.5015	406.9081	-0.25938	0.28848	-0.21406	-11.567	34.15	35.0795	0.0625	-0.11719	-0.16162	-20.919	49.747	-11.8964	0.22119	-0.15332	0.013184	-16.404	108.59018	221.5983	NaN	NaN	NaN
2.152	-77.483	59.941	419.1608	-0.27187	0.31074	-0.21436	-11.347	15.5679	29.0602	0.061035	-0.11865	-0.16846	-1.011	48.1727	-15.0658	0.21143	-0.1333	0.0053711	32.803	123.0065	194.4144	NaN	NaN	NaN
2.154	-91.927	67.5225	429.4124	-0.28711	0.33301	-0.21924	-25.292	50.115	4.566	0.054199	-0.10889	-0.19482	0.534999999999997	76.779	25.4759	0.20166	-0.10693	-0.0063477	-14.427	138.319	168.7771	NaN	NaN	NaN
2.156	-81.704	82.1665	437.965	-0.29941	0.35771	-0.22021	-11.064	59.926	34.78	0.044922	-0.10644	-0.2124	-8.978	51.654	49.01	0.2002	-0.095215	-0.010742	-13.134	156.941	170.869	NaN	NaN	NaN
2.158	-83.097	72.7974	460.62708	-0.31729	0.37901	-0.22842	-19.482	44.1064	37.2333	0.03418	-0.097168	-0.23584	-37.805	68.987	37.376	0.19727	-0.07959	-0.017578	20.842	143.6921	108.59	NaN	NaN	NaN
2.16	-65.963	70.0452	474.4538	-0.33173	0.40517	-0.23428	-24.249	67.25	23.5783	0.016602	-0.074707	-0.26025	-51.457	53.9799	22.4154	0.19092	-0.066162	-0.02124	-6.424	79.225	75.188	NaN	NaN	NaN
2.162	-72.201	67.5776	482.094	-0.34804	0.4332	-0.23691	-25.652	44.7374	32.562	0.012207	-0.061035	-0.2832	-53.118	67.637	41.3008	0.18604	-0.055176	-0.027344	15.754	80.394	56.136	NaN	NaN	NaN
2.164	-75.113	61.6918	487.0718	-0.35547	0.46338	-0.23828	-22.078	39.382	31.5164	-0.0087891	-0.035156	-0.3125	-43.677	45.1064	46.853	0.1709	-0.052734	-0.033203	-30.131	61.823	73.3084	NaN	NaN	NaN
2.166	-65.565	56.9637	515.2924	-0.37373	0.4874	-0.24073	-37.645	54.416	40.27019	-0.017334	-0.0087889	-0.3291	-45.418	42.5882	44.102	0.15332	-0.056641	-0.032715	-42.632	90.673	75.162	NaN	NaN	NaN
2.168	-71.074	52.05553	519.226	-0.38867	0.50937	-0.23887	-28.782	23.1288	38.584	-0.025391	0.012695	-0.35547	-37.66	44.931	32.7937	0.12793	-0.061035	-0.018066	-94.4282	84.912	36.253	NaN	NaN	NaN
2.17	-72.588	77.8108	540.14	-0.39961	0.52266	-0.2459	-39.024	56.142	21.298	-0.041504	0.02832	-0.37158	-44.984	46.6491	28.3826	0.10596	-0.064941	-0.033204	-48.359	86.799	9.809	NaN	NaN	NaN
2.172	-89.955	83.563	531.779	-0.40469	0.53477	-0.24179	-57.9462	48.69303	28.7347	-0.052246	0.033203	-0.39404	-43.738	38.2116	49.387	0.089355	-0.068359	-0.041016	-113.061	51.218	6.414	NaN	NaN	NaN
2.174	-71.383	85.5441	537.9347	-0.41113	0.5459	-0.24268	-31.913	15.6312	62.5514	-0.086914	0.032715	-0.42627	-63.677	17.5178	60.2484	0.074219	-0.072754	-0.049805	-67.018	37.222	29.1992	NaN	NaN	NaN
2.176	-66.241	85.9319	551.676	-0.42422	0.56211	-0.24629	-42.465	15.624	95.1596	-0.12793	0.021972	-0.43848	-73.857	37.6042	33.0823	0.067871	-0.069824	-0.05127	-111.2661	19.48	36.7798	NaN	NaN	NaN
2.178	-84.231	97.7922	555.272	-0.43242	0.57441	-0.24668	-79.209	-5.073	116.7511	-0.19922	0.013184	-0.47461	-62.756	35.4391	35.532	0.064941	-0.068848	-0.066895	-98.7033	25.643	51.53659	NaN	NaN	NaN
2.18	-73.084	87.2745	580.444	-0.44727	0.58926	-0.25137	-45.4884	34.6772	132.56	-0.33594	-9.541e-15	-0.55859	-49.4424	63.554	56.3168	0.063476	-0.064697	-0.077392	-68.674	57.5201	29.8192	NaN	NaN	NaN
2.182	-81.548	84.8615	594.3008	-0.4498	0.60088	-0.25606	-32.8175	42.1275	192.5288	-0.40869	-0.0053711	-0.59424	-73.892	31.45058	73.36446	0.066895	-0.056641	-0.093262	-65.749	52.1549	29.1236	NaN	NaN	NaN
2.184	-62.121	89.3462	593.4782	-0.45654	0.61084	-0.25537	-19.846	29.1038	252.5332	-0.57861	-0.039063	-0.66064	-90.7961	43.024	46.4388	0.07959	-0.050293	-0.11377	-62.8126	71.147	29.4433	NaN	NaN	NaN
2.186	-103.814	100.627	612.1223	-0.46982	0.6208	-0.25908	1.357	64.5743	383.178	-0.7522	-0.038818	-0.719	-79.529	17.5298	35.61569	0.085938	-0.044434	-0.12158	-88.905	45.491	43.932828	NaN	NaN	NaN
2.188	-82.716	100.198	630.239	-0.48115	0.63877	-0.25595	5.2554	56.041	573.28	-0.96045	-0.021484	-0.79443	-66.048	56.728	27.3	0.094238	-0.04248	-0.14502	-67.613	50.9774	36.2825	NaN	NaN	NaN
2.19	-96.12	98.219	639.853	-0.48935	0.65479	-0.25557	13.177	77.9834	729.585	-1.2905	0.020996	-0.88818	-42.828	21.3567	54.418	0.10547	-0.038818	-0.16553	-114.613	40.8018	49.4918	NaN	NaN	NaN
2.192	-88.911	108.6885	640.4779	-0.5	0.67871	-0.25332	17.8378	59.30249	906.042	-1.4897	0.083984	-0.97119	-32.076	35.823	39.0961	0.10693	-0.040039	-0.18359	-54.651	66.7404	33.8575	NaN	NaN	NaN
2.194	-103.487	92.8108	643.183	-0.50928	0.69775	-0.24951	53.994	5.33	1046.939	-1.9238	0.24219	-1.1309	-38.571	-15.00756	15.6951	0.10352	-0.043945	-0.20068	-79.73282	71.727	35.0668	NaN	NaN	NaN
2.196	-120.5012	82.786	657.578	-0.51182	0.71279	-0.2501	39.8056	31.392	1151.025	-2.2517	0.4563	-1.2449	-52.44	26.863	1.663	0.09375	-0.043457	-0.2168	-33.704	75.629	43.74752	NaN	NaN	NaN
2.198	-89.393	92.4668	662.005	-0.51465	0.72559	-0.24668	45.055	20.2611	1259.0899	-2.5684	0.72266	-1.3516	-19.959	-15.237	17.76001	0.072266	-0.041504	-0.23779	-41.562	52.644	35.753	NaN	NaN	NaN
2.2	-113.743	105.9691	663.398	-0.5127	0.73223	-0.25058	49.206	12.779	1261.9106	-2.8867	1.252	-1.498	-29.269	33.946	19.3176	0.053222	-0.031494	-0.2561	-35.204	39.612	61.649	NaN	NaN	NaN
2.202	-77.778	116.35718	678.5393	-0.51123	0.74365	-0.24737	35.153	11.917	1284.06	-2.9766	1.582	-1.5762	-16.494	6.123	22.8555	0.040527	-0.014648	-0.27197	-4.576	44.788	29.946237	NaN	NaN	NaN
2.204	-97.674	114.3587	709.9085	-0.51416	0.73682	-0.25928	80.048	-44.6534	1301.505	-3.0112	2.1489	-1.7886	-13.633	57.273	3.471	0.019531	0.01416	-0.29346	18.448	9.8472	40.3286	NaN	NaN	NaN
2.206	-81.877	122.941	712.508	-0.50478	0.7665	-0.24346	49.944	-34.648	1315.342	-2.7592	2.314	-1.9234	-28.936	17.4106	23.072	0.0058594	0.028809	-0.30859	14.9	22.1927	40.86765	NaN	NaN	NaN
2.208	-89.552	126.15	715.4416	-0.51475	0.75986	-0.26817	6.5034	-54.881	1338.619	-2.2183	2.2173	-1.9058	-38.847	65.229	39.8722	-0.010254	0.062988	-0.33008	-29.334	-10.0764	45.79037	NaN	NaN	NaN
2.21	-91.822	126.7415	728.8443	-0.51591	0.79033	-0.24942	8.782	-87.9322	1355.6999	-1.2168	1.7383	-1.6543	-27.163	13.6574	44.465	-0.024414	0.082519	-0.34692	25.007	7.458	27.4557	NaN	NaN	NaN
2.212	-80.145	127.1631	737.7595	-0.52803	0.7915	-0.26612	11.743	-71.0882	1371.4504	-0.79639	1.4458	-1.5308	-29.196	69.809	3.643	-0.041016	0.1084	-0.36426	-29.152	-14.59	12.5358	NaN	NaN	NaN
2.214	-101.511	127.4748	727.917	-0.53906	0.81641	-0.25684	26.358	-87.431	1359.871	-0.34912	0.95947	-1.4321	-26.176	21.447	12.229	-0.068359	0.12549	-0.38428	15.062	23.302	20.5481	NaN	NaN	NaN
2.216	-88.551	136.2707	720.221	-0.54932	0.83232	-0.2582	37.263	-60.0038	1351.55695	-0.26294	0.70947	-1.4312	-2.25299999999999	73.677	34.663	-0.078613	0.13037	-0.40332	-24.985	19.7037	38.988	NaN	NaN	NaN
2.218	-87.039	142.7706	713.937	-0.56983	0.84033	-0.27588	-8.231	-46.885	1390.9364	-0.26709	0.53467	-1.4272	-24.792	7.18	63.918	-0.12256	0.14355	-0.42432	-23.529	38.608	55.331	NaN	NaN	NaN
2.22	-80.711	145.4692	746.9598	-0.57529	0.87705	-0.26065	-58.256	-39.548	1440.7624	-0.3584	0.39697	-1.4199	-49.68	47.3981	92.395	-0.17212	0.14306	-0.4353	-59.418	43.129	42.07795	NaN	NaN	NaN
2.222	-71.384	146.6408	751.8549	-0.60879	0.87149	-0.28496	-76.862	9.57000000000001	1480.049	-0.41357	0.38232	-1.4253	-40.149	7.942	121.269	-0.24316	0.14111	-0.45117	-32.616	28.3383	23.747	NaN	NaN	NaN
2.224	-71.718	159.1318	756.841	-0.59912	0.9458	-0.26025	-102.2211	-10.127	1489.1921	-0.50732	0.44873	-1.4741	-26.335	58.2787	182.4839	-0.36377	0.12207	-0.46094	-53.044	23.9669	4.513	NaN	NaN	NaN
2.226	-64.674	160.2374	763.2628	-0.64941	0.90488	-0.31045	-99.745	-52.238	1452.955	-0.56983	0.52393	-1.5049	-23.6576	21.998	269.2089	-0.43701	0.11328	-0.48389	-67.7924	20.811	5.7394	NaN	NaN	NaN
2.228	-74.416	167.7916	754.4575	-0.64658	0.99111	-0.2751	-90.552	-132.3282	1455.361	-0.62793	0.59766	-1.5273	-17.685	69.692	365.264	-0.59131	0.087402	-0.52295	-85.295	64.25684	-2.979	NaN	NaN	NaN
2.23	-64.333	155.8112	769.2425	-0.70283	0.93955	-0.33681	-95.8434	-199.815	1467.762	-0.70068	0.65576	-1.5425	-2.4281	46.48965	511.935	-0.72315	0.066162	-0.5625	-101.492	68.2993	-7.213	NaN	NaN	NaN
2.232	-82.027	162.5542	756.6577	-0.69141	1.0403	-0.29199	-109.156	-190.336	1494.574	-0.74756	0.68213	-1.5601	-19.3736	98.3971	691.518	-0.88574	0.050781	-0.60938	-80.0985	74.3897	-7.059	NaN	NaN	NaN
2.234	-71.551	154.1011	773.615385	-0.75537	0.96143	-0.37354	-103.993	-206.627	1522.6603	-0.87305	0.75879	-1.6152	-30.4337	63.856	880.628	-1.1499	0.049805	-0.67725	-88.8795	45.3628	13.4076	NaN	NaN	NaN
2.236	-101.368	153.368	772.1593	-0.72441	1.0848	-0.30996	-30.368	-210.484	1509.693	-0.9785	0.82861	-1.6709	-37.984	71.777	1009.766	-1.3042	0.057617	-0.70654	-72.243	64.50754	14.6004	NaN	NaN	NaN
2.238	-92.058	159.6658	758.71761	-0.77607	1.0169	-0.3878	-51.5242	-215.385	1517.926	-1.0801	0.9082	-1.7344	-2.384	31.896	1143.309	-1.666	0.10938	-0.80469	-95.4546	58.472	39.4569	NaN	NaN	NaN
2.24	-100.875	165.1323	762.93088	-0.73545	1.131	-0.32959	-55.783	-227.385	1558.135	-1.1914	1.0215	-1.8203	33.6714	57.236	1296.175	-1.9351	0.20434	-0.86963	-67.9407	72.5715	58.9309	NaN	NaN	NaN
2.242	-91.535	176.0341	761.5729	-0.78399	1.0627	-0.41328	-20.628	-179.941	1587.804	-1.2266	1.0742	-1.8691	29.4089	41.2782	1450.493	-2.2104	0.36865	-0.87451	-121.556	45.231	44.9511	NaN	NaN	NaN
2.244	-91.086	181.0339	758.4529	-0.73584	1.1763	-0.3374	-41.1268	-151.971	1650.1489	-1.2734	1.1445	-1.9629	2.5344	45.5051	1533.154	-2.627	0.68262	-1.0195	-64.7491	31.8976	51.8103	NaN	NaN	NaN
2.246	-88.1	187.763	740.39538	-0.78603	1.095	-0.43447	2.7965	-107.438	1642.362	-1.2593	1.1587	-2.0288	26.2873	0.108999999999998	1501.171	-2.7983	0.89014	-1.1069	-67.303	50.508	16.272	NaN	NaN	NaN
2.248	-85.937	179.13628	745.6903	-0.7499	1.1704	-0.37949	5.4339	-89.308	1636.542	-1.2368	1.1489	-2.0581	48.404	-56.863	1465.267	-3.0913	1.3813	-1.3374	-44.702	49.489	39.2324	NaN	NaN	NaN
2.25	-97.879	184.07111	747.3995	-0.79834	1.0907	-0.46387	-5.6459	-98.834	1622.7653	-1.1841	1.1411	-2.1226	45.739	-109.637	1458.924	-3.1423	1.7063	-1.5388	-32.375	71.592	38.4445	NaN	NaN	NaN
2.252	-77.54	187.9855	758.6144	-0.77265	1.145	-0.4124	39.8057	-76.082	1594.153	-1.1707	1.1672	-2.1707	6.627	-150.002	1480.107	-2.916	1.9141	-1.6895	-44.632	39.0362	51.561	NaN	NaN	NaN
2.254	-83.963	189.8798	743.012	-0.82227	1.0469	-0.49414	28.3351	-73.164	1635.737	-1.2026	1.2271	-2.2417	8.92899999999999	-149.766	1457.075	-2.0835	1.8657	-1.6987	-33.622	41.6212	39.639	NaN	NaN	NaN
2.256	-95.332	188.629	753.6413	-0.79698	1.1073	-0.43936	60.943	-64.808	1621.17226	-1.2793	1.3359	-2.3203	-2.51300000000001	-177.981	1429.8158	-1.5737	1.7329	-1.6675	-12.124	6.2544	47.2207	NaN	NaN	NaN
2.258	-102.8054	190.1801	748.6341	-0.83154	1.0348	-0.49991	94.599	-49.089	1620.159	-1.3198	1.3872	-2.3433	-15.247	-148.16	1403.9891	-0.68018	1.3442	-1.5815	37.028	37.2928	56.1267	NaN	NaN	NaN
2.26	-98.249	196.25	718.4834	-0.81201	1.088	-0.45655	100.2	-61.656	1643.6687	-1.3789	1.4727	-2.3555	-8.618	-180.322	1414.437	-0.25048	1.021	-1.501	-25.217	25.88	57.165	NaN	NaN	NaN
2.262	-81.864	202.141	721.7995	-0.85078	1.0184	-0.51191	104.099	-71.764	1646.44143	-1.4026	1.469	-2.3425	-1.225	-137.853	1414.242	-0.016602	0.69531	-1.4961	1.184	52.423	41.9254	NaN	NaN	NaN
2.264	-106.139	206.823	705.027	-0.79395	1.1211	-0.43945	80.626	-86.695	1690.488	-1.394	1.4067	-2.312	-23.156	-142.688	1423.564	0.095215	0.42578	-1.5029	-33.85	34.876	12.186	NaN	NaN	NaN
2.266	-84.063	206.3759	700.9623	-0.8461	1.0219	-0.52539	96.953	-74.202	1680.276	-1.3457	1.2695	-2.2324	-47.007	-78.348	1429.888	0.10059	0.34961	-1.4663	-8.956	23.4536	34.0402	NaN	NaN	NaN
2.268	-81.107	200.1402	676.69	-0.77959	1.1126	-0.45987	73.821	-37.3432	1657.476	-1.3159	1.2036	-2.2046	-49.735	-102.86	1477.9585	0.016113	0.28662	-1.4141	-5.418	30.8129	48.18381	NaN	NaN	NaN
2.27	-68.026	202.64	671.787	-0.83233	1.0067	-0.554	60.005	-25.8729	1658.178	-1.252	1.0811	-2.1563	-75.595	-89.209	1471.2637	-0.12988	0.31958	-1.4275	8.873	1.841	63.937	NaN	NaN	NaN
2.272	-69.765	202.9494	678.59724	-0.75381	1.1029	-0.48857	47.7528	-20.685	1619.466	-1.2065	1.0376	-2.1411	-38.901	-186.376	1442.934	-0.29248	0.40088	-1.4644	-42.144	14.2869	31.8756	NaN	NaN	NaN
2.274	-66.586	208.1222	684.275	-0.80225	0.98486	-0.58154	23.3519	-12.094	1596.8803	-1.1543	1.0176	-2.127	-43.663	-236.632	1421.922	-0.49365	0.53369	-1.5063	-47.632	-6.7153	17.2081	NaN	NaN	NaN
2.276	-50.733	188.137	674.46	-0.71348	1.0824	-0.5127	50.026	-18.9693	1584.442	-1.0874	1.0181	-2.1011	-62.0021	-315.934	1473.098	-0.60107	0.59424	-1.5229	-35.385	8.6758	-5.4043	NaN	NaN	NaN
2.278	-76.429	199.225	670.562	-0.73633	0.98985	-0.57812	56.368	8.18535	1500.494	-1.0576	1.0225	-2.0859	-85.9933	-289.305	1526.76601	-0.81494	0.66553	-1.5483	-62.616	1.237	11.70328	NaN	NaN	NaN
2.28	-69.531	189.27	671.806	-0.65821	1.0641	-0.52227	-13.3053	10.632	1470.6979	-0.99951	1.0239	-2.0405	-69.716	-280.198	1535.9693	-0.98025	0.66772	-1.5652	-33.826	48.2088	9.4963	NaN	NaN	NaN
2.282	-78.859	189.947	678.904	-0.67334	0.96455	-0.58896	0.1859	27.486	1413.071	-0.9668	1.0162	-2.0049	-37.401	-266.309	1527.091	-1.1499	0.67627	-1.5913	-77.2905	32.8995	4.66	NaN	NaN	NaN
2.284	-62.105	182.404	675.241	-0.60107	1.0317	-0.53906	-11.7842	67.20502	1398.962	-0.94336	1.0039	-1.9629	-21.115	-283.696	1540.756	-1.3706	0.73682	-1.6558	-75.6343	64.865	14.05	NaN	NaN	NaN
2.286	-79.652	188.903	696.96	-0.6336	0.91094	-0.61797	-42.4112	57.744	1386.898	-0.93115	0.97314	-1.8979	-38.835	-256.29	1597.799	-1.4805	0.78906	-1.7109	-114.504	49.0386	8.172	NaN	NaN	NaN
2.288	-68.847	190.641	726	-0.58994	0.9458	-0.57998	-7.005	80.8143	1336.988	-0.93115	0.95947	-1.8628	-9.14	-217.144	1636.055813	-1.6504	0.94531	-1.8262	-73.3695	69.836	43.58	NaN	NaN	NaN
2.29	-41.314	186.896	757.94	-0.63799	0.85362	-0.6331	-43.374	86.8852	1348.937	-0.92725	0.93115	-1.7905	-9.5016	-140.827	1667.407	-1.7402	1.0625	-1.9151	-111.0216	75.467	18.2287	NaN	NaN	NaN
2.292	-75.199	201.2423	794.47	-0.64922	0.86855	-0.60156	-50.2628	97.694	1315.499	-0.92163	0.90844	-1.74	38.3424	-89.678	1655.669	-1.7949	1.1592	-2.0117	-68.216	56.863	33.1919	NaN	NaN	NaN
2.294	-79.679	211.898	855.54	-0.72559	0.80566	-0.64453	-85.72	132.255	1292.726	-0.91211	0.89063	-1.6934	-7.6868	-60.275	1648.6903	-1.7852	1.207	-2.1094	-78.6623	69.311	-4.262	NaN	NaN	NaN
2.296	-94.6126	224.53	916.1	-0.7709	0.81563	-0.61934	-78.7874	135.101	1266.113	-0.89209	0.85791	-1.6226	42.465	-61.192	1631.2146	-1.7612	1.2192	-2.1479	-97.229	44.8261	17.207	NaN	NaN	NaN
2.298	-87.9841	223.476	983.88	-0.84668	0.81777	-0.63828	-51.1634	120.456	1222.842	-0.87842	0.83838	-1.5854	35.3828	-52.136	1631.296	-1.73	1.2251	-2.2202	-58.8498	76.1526	18.662	NaN	NaN	NaN
2.3	-123.047	216.224	1034.73	-0.92129	0.79551	-0.65586	-30.337	126.3234	1204.081	-0.84521	0.80713	-1.5073	62.964	-29.397	1626.059	-1.7222	1.2661	-2.2729	-75.9751	49.281	28.375	NaN	NaN	NaN
2.302	-131.201	195.8182	1101.53	-0.98037	0.84072	-0.6497	-24.579	114.204	1181.7543	-0.81421	0.78296	-1.4587	46.2747	-35.388	1652.532	-1.7378	1.3052	-2.3022	-44.576	77.3687	40.916	NaN	NaN	NaN
2.304	-127.642	167.75	1175.97	-1.0742	0.77734	-0.69922	-29.438	150.272	1143.974	-0.7793	0.75586	-1.4043	48.209	-32.41481	1654.529	-1.7871	1.3896	-2.3359	-47.014	37.4177	48.898616	NaN	NaN	NaN
2.306	-127.683	138.763	1196.32	-1.118	0.86719	-0.66719	-28.462	155.778	1143.3421	-0.73096	0.7168	-1.3438	42.901	-63.7899	1689.7814	-1.8027	1.4444	-2.333	-17.387	55.868	59.456	NaN	NaN	NaN
2.308	-122.313	103.76	1226.15	-1.2261	0.81651	-0.72021	-0.980999999999995	163.6007	1110.935	-0.70654	0.70166	-1.312	89.143	-77.0748	1694.165	-1.8047	1.4668	-2.3164	-47	35.095	55.414	NaN	NaN	NaN
2.31	-142.124	57.49	1256.78	-1.2651	0.91572	-0.66709	7.428	191.7151	1065.402	-0.66699	0.66553	-1.2534	92.476	-112.527	1700.589	-1.7837	1.4087	-2.2866	1.5	41.859	82.03	NaN	NaN	NaN
2.312	-111.855	1.88	1273.11	-1.3717	0.89317	-0.71426	20.549	162.6286	1015.6517	-0.63721	0.6543	-1.2119	86.311	-103.9984	1713.607	-1.7544	1.3521	-2.2651	-2.209	6.3168	111.474	NaN	NaN	NaN
2.314	-110.307	-36.57	1244.64	-1.4019	0.99658	-0.65967	11.754	187.821	972.867	-0.61084	0.64014	-1.1655	56.866	-113.1715	1692.224	-1.6694	1.1763	-2.189	-13.598	-34.433	127.9061	NaN	NaN	NaN
2.316	-103.261	-70.2	1247.39	-1.4773	1.0042	-0.69659	-44.445	193.4	972.6022	-0.58398	0.61914	-1.1006	54.196	-48.061	1662.587	-1.5991	1.0327	-2.1254	-30.224	2.775713	123.312	NaN	NaN	NaN
2.318	-95.445	-92.73	1238.65	-1.4734	1.086	-0.65977	-35.101	180.35	949.523	-0.56885	0.61377	-1.0776	32.3286	-65.7179	1592.722	-1.5371	0.91602	-2.0781	26.864	7.8607	149.355	NaN	NaN	NaN
2.32	-77.202	-106.3	1220.28	-1.4715	1.1269	-0.6793	-55.051	227.141	906.3851	-0.53711	0.58984	-0.99414	37.328	-33.4206	1527.2525	-1.4546	0.82861	-2.0347	36.969	47.453	199.005	NaN	NaN	NaN
2.322	-87.38	-107.65	1179.88	-1.4102	1.1777	-0.66719	-46.98	178.5916	869.377	-0.50806	0.5686	-0.94702	30.87628	-72.488	1487.7351	-1.4199	0.80859	-2.0215	36.15582	27.524	321.191	NaN	NaN	NaN
2.324	-83.2741	-98.29	1148.33	-1.3125	1.2168	-0.66797	-14.09	179.665	814.9655	-0.4834	0.54883	-0.89258	31.2966	5.922	1436.9007	-1.3262	0.79688	-2.002	47.153	59.091	467.673	NaN	NaN	NaN
2.326	-74.8084	-87.436	1120.22	-1.1684	1.2187	-0.68818	-52.835	195.872	783.7318	-0.44336	0.52344	-0.81836	-6.632	14.661	1410.269	-1.2686	0.80175	-1.9844	8.7877	33.3662	661.653	NaN	NaN	NaN
2.328	-64.4526	-71.224	1068.1	-0.98908	1.2219	-0.67929	-43.164	197.0622	744.4857	-0.42822	0.5083	-0.78662	4.931	98.00272	1381.886	-1.2114	0.8042	-1.9644	22.99	44.2725	836.588	NaN	NaN	NaN
2.33	-86.4923	-42.83	1039.7	-0.83086	1.1277	-0.73203	-31.002	228.075	727.0615	-0.40283	0.48242	-0.72754	-37.039	61.7891	1366.6897	-1.1538	0.79346	-1.9116	17.7036	2.5075	997.786	NaN	NaN	NaN
2.332	-59.916	-21.35	1025.77	-0.64375	1.085	-0.7166	-33.818	181.894	696.435	-0.38086	0.45386	-0.66968	-34.58	108.282	1345.244	-1.1343	0.78369	-1.8882	65.727	20.2944	1177.3223	NaN	NaN	NaN
2.334	-34.386	-12.04	1024.29	-0.521	0.94189	-0.78564	-57.77	152.015	640.9755	-0.36377	0.42383	-0.6123	-29.245	87.163	1299.9334	-1.1016	0.76563	-1.8359	-6.94462	32.6313	1348.629	NaN	NaN	NaN
2.336	-10.066	-5.34999999999999	987.69	-0.36856	0.90352	-0.75743	-77.6867	170.354	623.1339	-0.33984	0.38477	-0.5459	-34.857	168.338	1248.917	-1.0608	0.75952	-1.7908	12.737	36.9314	1466.886	NaN	NaN	NaN
2.338	-9.65599999999999	-26.61	954.983	-0.28008	0.76055	-0.80723	-55.204	146.5607	608.334	-0.33154	0.36865	-0.51221	-86.1761	129.084	1239.061	-1.021	0.75342	-1.7456	2.658	30.588	1526.8096	NaN	NaN	NaN
2.34	18.019	-54.519	942.832	-0.17344	0.75039	-0.78066	-97.5317	208.579	575.709	-0.30859	0.33984	-0.45508	-106.764	176.963	1213.332	-0.96631	0.73486	-1.6851	33.0233	-17.857	1584.714	NaN	NaN	NaN
2.342	44.707	-80.035	940.349	-0.11348	0.64795	-0.80957	-102.393	180.543	544.8284	-0.29126	0.31714	-0.3999	-106.675	111.9324	1188.74216	-0.93896	0.73096	-1.6538	13.2471	-22.7007	1603.086	NaN	NaN	NaN
2.344	35.245	-107.167	918.719	-0.04248	0.65625	-0.79736	-83.8444	150.026	498.50379	-0.27197	0.30859	-0.36719	-75.484	173.146	1142.9288	-0.896	0.71826	-1.5796	-16.1226	-72.8514	1631.137	NaN	NaN	NaN
2.346	26.597	-136.753	908.183	-0.0081054	0.59863	-0.83457	-121.06	169.873	451.584	-0.23389	0.28955	-0.30908	-35.45	114.569	1103.7495	-0.87573	0.71167	-1.5222	-42.694	-59.357	1617.259	NaN	NaN	NaN
2.348	27.133	-174.284	915.689	0.043067	0.61132	-0.83496	-67.973	98.755	443.243	-0.21729	0.27393	-0.28027	-32.569	184.62	1076.8637	-0.85352	0.69727	-1.4648	-67.762	-130.069	1610.802	NaN	NaN	NaN
2.35	43.323	-190.1751	917.683	0.046973	0.5836	-0.87168	-55.652	145.4689	409.983	-0.18018	0.25293	-0.23145	-36.112	165.45	1083.979	-0.8208	0.68213	-1.3823	-7.086	-102.437	1585.419	NaN	NaN	NaN
2.352	34.088	-196.9853	913.372	0.067969	0.59483	-0.86621	-66.7341	138.911	399.9528	-0.14038	0.21582	-0.18628	-39.722	261.6007	1056.636	-0.80469	0.66797	-1.3418	-22.6	-128.315	1533.271	NaN	NaN	NaN
2.354	24.254	-194.45768	910.513	0.032227	0.58594	-0.92188	-41.037	118.8451	364.221	-0.1123	0.1958	-0.1543	-7.06	203.583	1012.8463	-0.7583	0.63525	-1.2642	-3.176	-77.62164	1521.549	NaN	NaN	NaN
2.356	30.391	-175.9146	927.042	0.0083006	0.60928	-0.91612	-32.815	167.9848	333.355	-0.079102	0.16943	-0.12256	-12.438	243.6443	966.9286	-0.72681	0.61255	-1.199	-70.833	-60.071	1567.3457	NaN	NaN	NaN
2.358	42.579	-158.3677	919.115	-0.06416	0.61806	-0.97217	-29.108	114.066	314.5643	-0.057617	0.14355	-0.091797	-47.315	171.8143	927.292	-0.6875	0.58057	-1.1367	-87.306	-28.21	1593.293	NaN	NaN	NaN
2.36	46.072	-127.669	898.012	-0.11611	0.66026	-0.96905	-21.944	140.0369	294.703	-0.039551	0.13721	-0.075684	-74.386	252.948	875.8195	-0.64258	0.54102	-1.0566	-116.2408	-40.85	1593.5596	NaN	NaN	NaN
2.362	62.128	-111.051	900.95	-0.20732	0.69072	-1.0148	-21.484	148.2665	296.2807	-0.0092773	0.10523	-0.036133	-65.802	231.601	839.3403	-0.61719	0.51758	-1.0156	-45.714	-55.104	1554.3258	NaN	NaN	NaN
2.364	66.677	-90.515	923.45	-0.28809	0.73535	-1.0176	-31.452	102.6042	285.39	0.028809	0.092285	-0.0087891	-62.011	292.335	794.55059	-0.57568	0.48389	-0.92529	-51.1652	-98.091	1540.452	NaN	NaN	NaN
2.366	69.521	-72.909	919.747	-0.37334	0.79053	-1.0446	-30.188	143.957	251.026	0.053711	0.082031	0.0048828	-70.129	191.439	766.66	-0.5437	0.4563	-0.86206	-46.47	-142.4319	1584.583	NaN	NaN	NaN
2.368	44.279	-52.955	908.023	-0.45391	0.83125	-1.067	7.072	75.0843	247.5889	0.069824	0.078613	0.0073242	-67.837	210.753	704.4228	-0.51123	0.43115	-0.80615	-73.8779	-162.6662	1584.634	NaN	NaN	NaN
2.37	58.854	-50.872	919.505	-0.50625	0.91718	-1.0748	-34.745	81.894	219.9007	0.10986	0.056641	0.038086	-32.484	165.318	656.5015	-0.45801	0.39453	-0.72266	-64.69	-214.904	1586.0732	NaN	NaN	NaN
2.372	50.633	-43.913	929.441	-0.5832	0.93975	-1.131	-19.485	116.068	202.1009	0.14746	0.046387	0.05957	-21.505	254.1	630.415	-0.43994	0.38135	-0.67822	-10.517	-203.997	1565.6891	NaN	NaN	NaN
2.374	48.041	-51.381	925.425	-0.59521	1.0513	-1.1108	10.024	80.4649	192.5895	0.16504	0.044922	0.060547	-12.191	200.1987	618.6772	-0.40234	0.34766	-0.60742	1.882	-255.082	1587.3562	NaN	NaN	NaN
2.376	17.285	-73.693	927.857	-0.67461	1.0264	-1.1869	-10.828	140.895	138.945	0.18896	0.03125	0.067383	-63.621	221.4476	573.0739	-0.36962	0.32739	-0.55395	6.197	-254.962	1637.73592	NaN	NaN	NaN
2.378	25.898	-99.447	938.82	-0.66211	1.1449	-1.1457	-14.237	85.764	151.212	0.20947	0.029785	0.076172	-58.804	151.868	507.932	-0.33545	0.30176	-0.49854	-36.14	-267.554	1670.4997	NaN	NaN	NaN
2.38	22.695	-120.052	960.771	-0.74219	1.082	-1.2375	-18.959	81.2726	125.05	0.23438	0.022949	0.099609	-50.813	193.0127	455.7657	-0.29102	0.27588	-0.41992	14.147	-241.417	1695.862	NaN	NaN	NaN
2.382	41.017	-125.2479	964.728	-0.71718	1.1996	-1.161	-41.288	123.87313	117.6086	0.24072	0.020508	0.10279	-77.3163	135.792	446.8733	-0.27197	0.26758	-0.38428	-39.341	-205.603	1672.411	NaN	NaN	NaN
2.384	51.489	-119.369	952.669	-0.81396	1.0786	-1.2593	-19	62.873	117.2893	0.2334	0.016602	0.10352	-89.949	162.9141	432.5512	-0.22803	0.23584	-0.31055	7.23785	-149.917	1662.405	NaN	NaN	NaN
2.386	67.205	-112.177	952.324	-0.77119	1.2163	-1.1421	-39.87	113.019	89.639	0.229	0.016602	0.11426	-104.3741	124.42	395.9173	-0.19507	0.20972	-0.26099	2.3996	-63.371	1605.471	NaN	NaN	NaN
2.388	65.918	-87.094	924.729	-0.86778	1.0836	-1.2153	-101.132	96.389	98.0795	0.23193	0.0078125	0.12939	-95.2304	181.958	347.859	-0.16406	0.18652	-0.21729	0.462999999999999	-12.991	1563.606	NaN	NaN	NaN
2.39	54.257	-71.279	898.889	-0.83066	1.1988	-1.0906	-83.96863	90.365	88.0791	0.21436	0.012695	0.12207	-73.0018	134.3009	307.244	-0.13037	0.15723	-0.17383	8.4314	16.094	1562.225	NaN	NaN	NaN
2.392	36.368	-57.075	875.401	-0.91817	1.0771	-1.1506	-52.7812	134.891	71.085	0.21093	0.00708	0.13306	-66.041	140.687	286.007	-0.11377	0.14111	-0.1377	41.984	-4.222	1576.056	NaN	NaN	NaN
2.394	44.95	-58.004	884.035	-0.88037	1.1743	-1.021	-66.1696	59.1472	77.9317	0.21045	0.0087891	0.13965	-79.409	93.157	247.966	-0.083496	0.10107	-0.089844	77.445	11.5208	1595.721	NaN	NaN	NaN
2.396	41.677	-46.017	866.805	-0.94424	1.0769	-1.0778	-86.6087	69.446	50.546	0.21045	0.01416	0.13379	-72.389	150.937	227.055	-0.064697	0.073974	-0.056396	70.522	7.419	1577.9801	NaN	NaN	NaN
2.398	27.983	-34.67	843.1	-0.91162	1.1134	-1.0011	-78.3338	49.785	29.586	0.20825	0.016845	0.13525	-47.027	160.0349	214.529	-0.038086	0.047852	-0.024902	73.662	36.665	1574.277	NaN	NaN	NaN
2.4	16.063	-26.112	825.629	-0.91904	1.0732	-1.014	-75.215	28.237	13.688	0.21729	0.020508	0.13574	-42.364	176.91166	209.477	0.0053711	0.0087891	0.017578	48.999	22.717	1574.52575	NaN	NaN	NaN
2.402	23.884	-19.293	815.584	-0.89629	1.0455	-0.99042	-68.7162	87.1451	18.652	0.2583	0.013672	0.15576	-50.996	133.23107	198.1996	0.023438	-0.0024414	0.038574	78.734	40.608	1555.3005	NaN	NaN	NaN
2.404	28.958	-21.466	801.64	-0.85547	1.0557	-0.96094	-59.564	28.521	51.554	0.271	0.01123	0.15723	-58.654	141.3155	182.6776	0.063477	-0.03418	0.075195	38.8112	25.228	1525.5649	NaN	NaN	NaN
2.406	22.652	-11.017	770.836	-0.85166	0.97824	-0.97002	-60.306	43.6163	40.3765	0.2666	0.02002	0.13232	-49.672	138.2909	145.9383	0.088135	-0.045655	0.09546	57.662	27.016	1506.167	NaN	NaN	NaN
2.408	16.677	-24.167	766.376	-0.79317	1.0086	-0.91387	-53.7136	69.79	50.2496	0.27563	0.0083009	0.13404	-37.413	168.34	145.95	0.10986	-0.056152	0.11328	-5.395	4.1874	1516.0567	NaN	NaN	NaN
2.41	27.907	-31.356	767.602	-0.80722	0.91563	-0.94355	-32.258	28.33858	56.7775	0.27539	-0.0024414	0.14258	-36.385	142.191	149.3858	0.12793	-0.061035	0.13086	11.8831	21.04	1538.007	NaN	NaN	NaN
2.412	36.621	-38.452	762.005	-0.74912	0.95909	-0.86885	-47.053	73.857	55.2634	0.2749	-0.02002	0.15771	-44.194	118.452	132.9366	0.13721	-0.05957	0.13721	-0.651	62.172	1477.852	NaN	NaN	NaN
2.414	10.752	-49.533	739.038	-0.77441	0.86621	-0.91602	-56.168	18.59514	64.581	0.26709	-0.024902	0.15283	-37.813	97.974	115.8689	0.14453	-0.044434	0.15039	71.26	55.167	1450.167	NaN	NaN	NaN
2.416	5.535	-59.205	726.435	-0.71465	0.9039	-0.83965	-16.24	22.646	39.623	0.23975	-0.029297	0.13672	-21.07	87.0384	109.6629	0.16113	-0.044434	0.15967	55.3658	115.9572	1373.952	NaN	NaN	NaN
2.418	2.009	-43.667	730.853	-0.71679	0.85431	-0.85819	-12.347	58.429	6.828	0.21826	-0.024902	0.13183	-22.053	81.06516	92.6268	0.1792	-0.036133	0.1875	7.351	119.5856	1351.098	NaN	NaN	NaN
2.42	4.747	-26.619	716.894	-0.67422	0.8578	-0.80547	1.496	-10.43748	15.7426	0.20166	-0.01416	0.11816	-14.292	61.323	85.60982	0.17578	-0.029297	0.18994	-13.025	189.429	1345.048	NaN	NaN	NaN
2.422	-13.549	-17.996	700.601	-0.65058	0.84649	-0.80429	-0.724000000000004	44.507	17.309	0.18408	0.00097656	0.10791	-41.341	75.0503	69.6647	0.17188	-0.023926	0.19385	-51.4279	195.272	1301.4888	NaN	NaN	NaN
2.424	0.0210000000000008	-7.079	690.389	-0.62305	0.80664	-0.79102	-12.82	14.638	39.1694	0.17725	0.010254	0.10254	-32.478	83.7434	58.432	0.18115	-0.0053711	0.21143	-12.834	235.06	1234.0434	NaN	NaN	NaN
2.426	1.691	16.437	673.837	-0.57687	0.84227	-0.75148	4.025	14.517	29.633	0.16406	0.029785	0.09668	-28.012	93.41	49.702	0.16577	0.0048828	0.21118	-46.7336	216.707	1137.189	NaN	NaN	NaN
2.428	-9.15600000000001	21.044	645.78	-0.56905	0.78604	-0.75889	3.269	58.02369	27.614	0.16285	0.044434	0.09253	-19.149	51.3223	61.1789	0.15967	0.0083008	0.2168	-25.834	215.5848	1110.653	NaN	NaN	NaN
2.43	-26.911	21.043	627.805	-0.51789	0.83718	-0.6929	-7.398	1.182	38.2618	0.15967	0.060547	0.09082	-72.947	40.816	36.57341	0.15771	0.023438	0.23193	-102.581	209.921	1058.762	NaN	NaN	NaN
2.432	-7.009	19.933	607.669	-0.53067	0.76777	-0.71368	-15.334	36.2373	24.3008	0.15918	0.070313	0.084961	-83.303	25.1715	53.5748	0.14648	0.027832	0.23535	-90.9193	195.7678	1056.1104	NaN	NaN	NaN
2.434	-8.51400000000001	25.064	598.935	-0.48242	0.8252	-0.64063	-25.153	34.2126	32.6729	0.1582	0.075195	0.087402	-68.908	70.986	43.5915	0.14648	0.033691	0.23828	-64.0479	217.191	1002.0033	NaN	NaN	NaN
2.436	8.98700000000001	25.708	570.565	-0.49949	0.75265	-0.66277	-35.964	17.7955	34.028	0.14893	0.086426	0.095215	-61.962	34.803	61.0473	0.1438	0.033936	0.24268	-51.3233	187.1758	960.1694	NaN	NaN	NaN
2.438	-10.777	23.175	563.391	-0.46684	0.78192	-0.60339	-47.2365	75.495	13.182	0.14843	0.084228	0.10181	-55.748	31.0694	35.3064	0.1582	0.039063	0.24756	-44.259	216.4041	933.2993	NaN	NaN	NaN
2.44	1.544	21.729	563.044	-0.46205	0.74303	-0.60559	-51.7881	3.4201	35.3122	0.1416	0.084473	0.11035	-71.368	-22.9553	33.2367	0.19824	0.037109	0.25049	-57.948	191.998	870.714	NaN	NaN	NaN
2.442	1.587	32.9307	560.133	-0.43988	0.73936	-0.57155	-72.552	23.001	26.674	0.13965	0.07666	0.11914	-59.991	22.397	-8.1426	0.22607	0.041504	0.2478	-98.75	236.306	849.423	NaN	NaN	NaN
2.444	-5.235	26.93	538.652	-0.41162	0.74268	-0.55811	-64.418	39.4388	14.313	0.14258	0.071289	0.12012	-44.1413	2.692	7.472	0.2666	0.040527	0.25	-117.1703	214.485	847.6156	NaN	NaN	NaN
2.446	-4.51600000000001	18.049	532.25	-0.40562	0.7058	-0.55634	-45.477	2.642	13.808	0.14453	0.057617	0.12451	-65.635	38.9986	0.157	0.30469	0.030762	0.25146	-67.181	218.257	802.754	NaN	NaN	NaN
2.448	7.036	5.078	536.555	-0.36063	0.72612	-0.52039	-60.83	62.8555	2.314	0.15014	0.048096	0.12475	-50.48	-4.523	36.2051	0.32471	0.025879	0.24902	-64.4561	192.4999	750.009	NaN	NaN	NaN
2.45	-2.373	2.33	526.588	-0.35308	0.68473	-0.52719	-77.7011	15.93	23.5383	0.15479	0.041016	0.125	-57.991	29.094	18.6458	0.34717	0.0029297	0.24658	-59.154	214.9988	677.829	NaN	NaN	NaN
2.452	1.386	6.899	497.929	-0.31134	0.69307	-0.48996	-59.573	28.9214	10.966	0.15967	0.039551	0.11914	-37.991	13.1531	40.387	0.35986	-0.013428	0.24439	-102.2053	238.479	629.611	NaN	NaN	NaN
2.454	-8.646	1.433	498.651	-0.28467	0.68994	-0.47607	-64.5898	61.1808	-0.0680000000000014	0.1626	0.037598	0.11523	-57.691	50.702	24.5025	0.36182	-0.037598	0.23975	-76.869	241.9495	598.213	NaN	NaN	NaN
2.456	14.804	17.512	485.063	-0.27059	0.65327	-0.47344	-69.5222	12.2085	43.717	0.17139	0.036621	0.11133	-59.067	15.2512	56.406	0.34912	-0.067383	0.23486	-74.855	274.674	521.372	NaN	NaN	NaN
2.458	9.015	22.993	471.428	-0.23597	0.66782	-0.4385	-59.681	70.371	41.4451	0.17383	0.035888	0.10815	-57.049	61.118	33.54299	0.3374	-0.076172	0.23047	-39.017	255.5292	496.881	NaN	NaN	NaN
2.46	-3.78	24.875	457.771	-0.24157	0.60899	-0.46223	-70.4698	37.372	40.8037	0.17383	0.041992	0.098633	-54.799	40.992	19.993	0.30566	-0.096191	0.21387	-19.962	255.9807	459.213	NaN	NaN	NaN
2.462	9.61999999999999	19.5637	464.084	-0.19183	0.63976	-0.40753	-77.132	37.969	23.0139	0.17285	0.048828	0.080078	-26.242	83.288	-0.771999999999998	0.27637	-0.098389	0.20068	-40.045	224.0062	463.862	NaN	NaN	NaN
2.464	-4.137	30.9775	471	-0.19971	0.59229	-0.43506	-24.373	70.446	3.851	0.17578	0.056152	0.071289	-7.001	17.657	34.8279	0.24561	-0.091309	0.19043	-36.298	262.662	446.5055	NaN	NaN	NaN
2.466	-8.72	32.5331	444.464	-0.1613	0.60565	-0.39236	-26.949	9.5724	27.9924	0.18408	0.077148	0.052246	-35.545	33.423	0.568700000000001	0.22656	-0.06543	0.17188	-61.9155	248.632	410.839	NaN	NaN	NaN
2.468	-21.63	31.8054	423.831	-0.15158	0.60856	-0.3828	-35.971	46.438	23.7696	0.18652	0.08667	0.031738	-32.867	12.13	20.1334	0.21924	-0.053223	0.16455	-14.675	265.77	369.6241	NaN	NaN	NaN
2.47	-12.912	35.8096	415.382	-0.14508	0.56697	-0.38488	-14.577	38.45	15.125	0.18799	0.099121	0.019043	0.295999999999999	67.9017	1.7624	0.20605	-0.015625	0.14697	-58.2642	208.239	341.4008	NaN	NaN	NaN
2.472	-13.828	42.2046	427.706	-0.11074	0.60799	-0.34013	-3.128	23.3789	20.1372	0.1875	0.12695	-0.0039063	-9.962	49.727	24.0545	0.20483	0.010742	0.13086	-44.919	173.5653	312.3483	NaN	NaN	NaN
2.474	-8.672	49.6879	403.112	-0.12598	0.521	-0.38623	-18.443	74.61	27.4979	0.19043	0.13867	-0.015625	-25.578	70.1071	46.6818	0.20313	0.040527	0.12207	-67.824	163.7052	300.2312	NaN	NaN	NaN
2.476	-18.819	37.4223	407.137	-0.087409	0.57347	-0.31727	-4.559	16.8584	54.64	0.19141	0.17188	-0.037598	-46.437	31.3754	38.7213	0.19922	0.070313	0.10986	-42.453	131.0414	279.2234	NaN	NaN	NaN
2.478	-16.847	34.0343	404.155	-0.062641	0.57953	-0.29696	-0.566000000000003	58.91	43.1864	0.19092	0.20044	-0.055664	-45.522	75.23811	22.592	0.19434	0.078125	0.10596	-44.505	141.2737	232.0164	NaN	NaN	NaN
2.48	-24.058	33.8833	400.434	-0.084814	0.51037	-0.32834	-1.202	52.4	32.8813	0.19141	0.22754	-0.07373	-48.452	49.158	55.538	0.18408	0.090332	0.10156	-42.009	102.815	207.6617	NaN	NaN	NaN
2.482	-22.039	29.735	400.13	-0.041911	0.55462	-0.26428	-11.714	17.5093	36.5784	0.19727	0.25635	-0.10205	-52.616	62.991	44.9742	0.17139	0.099608	0.104	-56.709	135.9161	167.5936	NaN	NaN	NaN
2.484	-19.466	25.361	395.035	-0.016602	0.57861	-0.23486	-23.585	67.479	32.9388	0.20557	0.26416	-0.11719	-63.515	38.4422	61.3131	0.16211	0.098145	0.10254	-72.8085	104.27224	164.4002	NaN	NaN	NaN
2.486	-2.143	23.059	391.937	-0.068857	0.43923	-0.31713	-32.4	10.1985	43.983	0.21533	0.2832	-0.12354	-46.629	51.763	26.59	0.15088	0.10742	0.1001	-60.052	117.5556	162.97716	NaN	NaN	NaN
2.488	-6.173	34.612	382.28	0.0009859	0.55068	-0.20165	-19.488	42.198	22.76192	0.22681	0.32984	-0.15845	-45.7133	41.466	23.936	0.15088	0.10303	0.098633	-57.853	89.809	160.619	NaN	NaN	NaN
2.49	-16.341	31.683	375.284	-0.05294	0.4279	-0.30118	-18.432	59.0753	19.421	0.22119	0.36035	-0.1958	-52.371	32.126	39.4763	0.14453	0.10303	0.087402	-39.42	97.5573	119.75111	NaN	NaN	NaN
2.492	-26.847	39.163	375.487	-0.015115	0.47529	-0.21213	-55.789	2.414	38.5261	0.21826	0.41943	-0.24707	-66.315	8.7879	43.1416	0.14575	0.10156	0.083008	-79.7317	92.5128	78.0314	NaN	NaN	NaN
2.494	1.16499999999999	33.9038	374.704	-0.010254	0.47852	-0.2207	-43.687	61.363	38.635	0.21191	0.44189	-0.26172	-71.819	34.644	25.285	0.14063	0.099121	0.074219	-70.729	97.7173	47.258	NaN	NaN	NaN
2.496	-20.756	41.568	367.109	-0.046577	0.39401	-0.24747	-46.366	14.836	46.321	0.20361	0.44873	-0.25195	-58.7742	41.2628	26.57	0.146	0.10498	0.057129	-72.9854	87.5444	30.502	NaN	NaN	NaN
2.498	-3.121	41.0826	360.443	0.016756	0.49897	-0.15059	-63.974	28.8003	28.6531	0.19531	0.48267	-0.2727	-35.471	53.6133	28.0634	0.146	0.10742	0.045898	-66.182	57.89145	41.9597	NaN	NaN	NaN
2.5	-8.74299999999999	41.9755	374.437	-0.066057	0.33053	-0.27315	-52.5034	55.7699	32.5572	0.18262	0.50977	-0.29932	-70.0479	32.7945	58.22	0.15332	0.12646	0.030273	-72.291	60.711	23.43766	NaN	NaN	NaN
2.502	-3.497	44.31282	371.558	-0.0037982	0.44897	-0.15212	-55.148	-14.3245	51.283	0.16357	0.55518	-0.3418	-59.865	25.0826	57.992	0.15454	0.14038	0.015625	-42.582	40.9375	41.4367	NaN	NaN	NaN
2.504	-5.654	42.9336	365.595	-0.055664	0.34082	-0.24658	-83.8109	42.676	25.5504	0.16162	0.55762	-0.35498	-79.201	22.0055	43.614	0.15625	0.16455	-0.0039063	-61.21366	69.056	38.7333	NaN	NaN	NaN
2.506	-1.23700000000001	40.7483	353.528	-0.050167	0.35458	-0.19879	-64.7105	34.7548	17.7573	0.146	0.56152	-0.36572	-63.2846	28.8008	43.493	0.16162	0.1875	-0.03125	-68.322	35.4336	41.3907	NaN	NaN	NaN
2.508	-8.379	41.1471	368.992	-0.021978	0.40317	-0.16139	-78.2324	7.6982	64.2397	0.12134	0.57471	-0.39722	-56.1948	12.5296	34.932	0.16357	0.19971	-0.04541	-45.917	42.0168	28.5128	NaN	NaN	NaN
2.51	0.706999999999994	51.8765	359.758	-0.09566	0.26457	-0.25729	-68.2378	59.968	90.854	0.069824	0.58838	-0.4624	-32.712	8.727	48.7625	0.15967	0.22998	-0.071777	-42.881	24.44	19.4966	NaN	NaN	NaN
2.512	-12.333	62.531	355.251	-0.021515	0.40622	-0.13027	-68.944	2.519	149.53915	-0.01123	0.57031	-0.57324	-24.578	12.0768	14.136	0.16064	0.23926	-0.085205	-10.327	50.5338	6.367	NaN	NaN	NaN
2.514	-14.336	56.827	360.741	-0.11621	0.2085	-0.28369	-57.019	60.6363	162.333	-0.064941	0.56299	-0.62061	-19.456	11.312	1.6342	0.15527	0.25488	-0.099609	-36.906	42.2341824	29.4061	NaN	NaN	NaN
2.516	-25.694	45.968	378.696	-0.05008	0.36753	-0.14986	-71.107	64.0693	264.614	-0.22363	0.521	-0.71143	-32.524	24.18	16.1481	0.14844	0.27783	-0.12842	-37.856	46.871	47.1025	NaN	NaN	NaN
2.518	-25.334	49.578	385.783	-0.097242	0.23873	-0.23125	-81.185	38.899	443.034	-0.38183	0.49829	-0.77514	-17.649	11.515	32.047	0.14453	0.28564	-0.13428	-55.052	47.449	36.518	NaN	NaN	NaN
2.52	-16.332	52.0689	369.148	-0.08407	0.31576	-0.16365	-94.696	110.9044	598.675	-0.57617	0.49805	-0.84766	-24.541	33.7594	10.3999	0.13379	0.30713	-0.16504	-18.633	52.838	28.5205	NaN	NaN	NaN
2.522	-28.545	47.8727	363.579	-0.10943	0.21825	-0.21006	-104.92	49.5584	783.186	-0.91992	0.57031	-0.95117	-10.655	38.5765	28.5993	0.12476	0.32666	-0.18287	-9.92	90.995	19.024	NaN	NaN	NaN
2.524	-23.209	57.15	371.552	-0.064941	0.33838	-0.095215	-56.755	67.011	907.852	-1.1245	0.62939	-1.0229	-36.923	64.776	19.4366	0.11621	0.33594	-0.19629	-31.643	55.455	41.6911	NaN	NaN	NaN
2.526	-25.653	53.511	381.557	-0.12068	0.19398	-0.199	-62.033	71.273	1076.153	-1.5488	0.75391	-1.1309	-26.235	46.7929	55.36	0.094238	0.36963	-0.22217	-49.894	85.267	34.489	NaN	NaN	NaN
2.528	-31.135	66.335	366.454	-0.040284	0.37452	-0.050849	-103.755	23.0055	1246.7146	-1.8296	0.92725	-1.1899	-52.119	61.609	21.9878	0.087891	0.37891	-0.23047	-60.016	54.358	38.14	NaN	NaN	NaN
2.53	-27.573	57.3732	375.678	-0.13125	0.1867	-0.2051	-108.019	81.338	1318.057	-2.021	1.1675	-1.2397	-48.869	37.2451	-7.991	0.070801	0.40625	-0.25195	-31.962	67.811	14.521	NaN	NaN	NaN
2.532	-18.26	53.2644	380.284	-0.045616	0.36864	-0.074032	-95.631	19.323	1353.3691	-2.1167	1.5259	-1.3296	-27.075	63.3474	-6.244	0.062256	0.43286	-0.26758	-29.671	41.4784	57.548	NaN	NaN	NaN
2.534	-33.624	58.635	391.581	-0.14893	0.17773	-0.23145	-102.204	-9.371	1346.715	-2.0742	1.6738	-1.3779	-28.603	48.49697	34.2292	0.054199	0.46338	-0.29004	-29.37	48.52	40.898	NaN	NaN	NaN
2.536	-42.435	62.935	381.025	-0.054202	0.35029	-0.095514	-81.76	1.7714	1337.385	-1.791	1.8496	-1.4277	-34.701	67.3018	20.657	0.04248	0.50439	-0.31152	-63.479	37.63	37.2783	NaN	NaN	NaN
2.538	-29.57	67.692	382.761	-0.12705	0.23936	-0.18418	-61.899	-72.588	1356.657	-1.4182	1.8411	-1.3875	-42.906	42.5886	24.789	0.040039	0.52734	-0.31934	-46.199	41.098	34.9221	NaN	NaN	NaN
2.54	-11.849	61.894	396.396	-0.094243	0.30926	-0.13419	-100.46462	-24.765	1330.607	-1.0171	1.7485	-1.3003	-62.634	53.3926	-1.7224	0.041504	0.57031	-0.33203	-76.7843	30.6617	39.2807	NaN	NaN	NaN
2.542	-34.717	48.495	406.784	-0.13759	0.28819	-0.14843	-100.3772	-47.786	1340.532	-0.63428	1.5181	-1.1685	-59.6212	28.8676	46.32	0.040039	0.5962	-0.34131	-59.72	-3.9503	62.969	NaN	NaN	NaN
2.544	-26.636	43.528	402.593	-0.17041	0.26563	-0.17236	-61.035	-98.629	1335.276	-0.5415	1.394	-1.1226	-47.339	47.8341	62.42475	0.042969	0.61816	-0.36182	-64.34468	-1.057	52.835	NaN	NaN	NaN
2.546	-16.124	47.7253	404.804	-0.17988	0.30371	-0.14541	-12.5674	-93.579	1306.4988	-0.53711	1.1621	-1.0508	-50.23	8.0331	103.887	0.043945	0.62744	-0.38477	-69.474	-5.089	41.76294	NaN	NaN	NaN
2.548	-7.976	54.7912	409.975	-0.22441	0.27598	-0.17519	-2.593	-160.333	1306.7703	-0.6438	1.04	-1.0391	-67.999	43.143	113.234	0.03125	0.63086	-0.40039	-62.9769	25.7623	14.445	NaN	NaN	NaN
2.55	-30.776	57.758	419.415	-0.21816	0.31543	-0.15683	-40.712	-125.332	1320.338	-0.78809	0.94922	-1.0342	-73.8273	31.53	176.881	-0.012207	0.62549	-0.43408	-58.038	4.7385	41.8592	NaN	NaN	NaN
2.552	-10.659	55.19	410.558	-0.24297	0.31035	-0.17764	-69.6886	-101.548	1351.703	-1.0034	0.89893	-1.0454	-87.071	52.496	249.1375	-0.081055	0.60498	-0.47022	-76.33606	24.2163	31.2909	NaN	NaN	NaN
2.554	-6.91799999999999	51.381	430.311	-0.24463	0.3291	-0.18164	-95.86977	-139.21	1400.739	-1.1499	0.91553	-1.0967	-106.956	18.6038	354.161	-0.16895	0.56738	-0.5166	-58.361	14.779	39.454	NaN	NaN	NaN
2.556	8.01300000000001	56.969	429.768	-0.2498	0.34239	-0.18887	-71.181398	-110.05	1402.3977	-1.2729	0.97705	-1.1714	-112.017	37.065	469.236	-0.32617	0.51758	-0.58057	-21.149	35.2225	24.8075	NaN	NaN	NaN
2.558	-15.57	53.237	434.905	-0.26192	0.35195	-0.19726	-29.8173	-204.444	1385.159	-1.375	1.0977	-1.2715	-107.307	4.516	677.934	-0.43115	0.48975	-0.62061	-72.3963	26.4268	20.4003	NaN	NaN	NaN
2.56	-23.296	53.514	437.116	-0.267	0.35937	-0.20547	-26.099	-249.381	1392.18	-1.4102	1.1602	-1.3145	-85.581	27.842	888.922	-0.68408	0.45166	-0.71436	-53.13	41.0514	20.22525	NaN	NaN	NaN
2.562	-6.92599999999999	50.18	448.534	-0.27891	0.36231	-0.21641	-54.5472	-252.6543	1450.274	-1.4624	1.2603	-1.3979	-98.906	11.3483	1114.245	-0.9358	0.44018	-0.78735	-58.3801	54.3083	-6.3432	NaN	NaN	NaN
2.564	-1.44399999999999	67.771	452.304	-0.2959	0.36572	-0.22705	-50.985	-327.09	1493.155	-1.4978	1.3064	-1.4489	-88.922	19.25	1268.797	-1.2163	0.45557	-0.86279	-41.348	60.3737	-18.627	NaN	NaN	NaN
2.566	-11.443	75.82	434.675	-0.30898	0.37129	-0.22822	-5.967	-288.595	1484.174	-1.5229	1.3384	-1.4917	-124.51	-0.866000000000003	1403.412	-1.6172	0.5332	-0.94336	-36.887	75.868	-12.772	NaN	NaN	NaN
2.568	-19.955	73.524	446.169	-0.32032	0.3708	-0.23584	79.0451	-310.472	1472.7469	-1.5371	1.3486	-1.5176	-137.531	16.4442	1539.984	-1.8203	0.61621	-0.95508	-17.199	45.787	31.381	NaN	NaN	NaN
2.57	-5.94	73.979	461.842	-0.32852	0.37861	-0.24131	79.343	-331.113	1511.856	-1.5444	1.3423	-1.5288	-152.391	11.968	1618.234	-2.2632	0.86572	-1.021	-61.7018	57.505	35.31121	NaN	NaN	NaN
2.572	-16.659	74.156	479.673	-0.33809	0.379	-0.25088	67.9439	-280.376	1590.767	-1.5649	1.3325	-1.5171	-98.039	11.277	1613.957	-2.5161	1.1206	-1.1182	-29.985	38.6773	27.991	NaN	NaN	NaN
2.574	-36.6	71.629	470.028	-0.34082	0.39111	-0.25488	40.579	-296.454	1677.584	-1.5952	1.3276	-1.5122	-99.396	-48.729	1547.155	-2.6816	1.3994	-1.2324	-4.687	64.451	26.7231	NaN	NaN	NaN
2.576	-20.876	65.093	484.169	-0.34033	0.39736	-0.26104	-4.86	-210.3443	1692.143	-1.6465	1.3359	-1.5078	-106.4184	-100.433	1503.77	-2.646	1.731	-1.3862	-29.071	42.4586	37.663	NaN	NaN	NaN
2.578	-10.666	60.194	498.217	-0.34482	0.39814	-0.27031	-14.634	-157.2266	1698.325	-1.7617	1.3887	-1.5391	-89.923	-157.329	1462.823	-2.4878	1.8521	-1.4312	-39.41	67.7087	26.352	NaN	NaN	NaN
2.58	-25.344	62.911	495.307	-0.3374	0.40401	-0.27266	-42.087	-163.738	1696.054	-1.8218	1.4224	-1.5562	-44.60079	-163.676	1453.23	-1.8862	1.9497	-1.4116	-39.162	43.76874	26.8383	NaN	NaN	NaN
2.582	-33.986	64.082	484.694	-0.3126	0.4332	-0.25967	-28.753	-88.306	1695.943	-1.9395	1.5156	-1.5996	-33.769	-157.31	1403.617	-1.2261	1.8501	-1.3335	-38.614	49.2022	15.161	NaN	NaN	NaN
2.584	-22.708	79.866	482.161	-0.31152	0.45654	-0.27051	-32.372	-110.415	1718.256	-2.0132	1.5845	-1.6314	7.678	-191.437	1356.887	-0.9624	1.7368	-1.2769	-36.952	48.0823	35.0584	NaN	NaN	NaN
2.586	-8.42500000000001	84.038	498.964	-0.32354	0.42158	-0.3165	-37.547	-73.683	1727.045	-2.0601	1.6411	-1.6567	24.133	-221.26	1350.391	-0.65283	1.4458	-1.1401	-28.242	39.456	64.387	NaN	NaN	NaN
2.588	-27.676	85.696	518.354	-0.31611	0.42978	-0.3208	-28.4508	-52.531	1754.0698	-2.0459	1.6934	-1.6738	-18.674	-248.6469	1412.0439	-0.62353	1.233	-1.0562	-61.856	62.975	69.395	NaN	NaN	NaN
2.59	-37.918	74.422	519.164	-0.32197	0.42822	-0.31885	-30.8652	-101.22	1765.5204	-2.0107	1.7012	-1.6797	-55.594	-207.064	1473.81773	-0.72119	1.0747	-0.99268	-38.31	49.181	44.092	NaN	NaN	NaN
2.592	-14.667	81.336	524.804	-0.3248	0.43613	-0.3207	-36.8523	-56.407	1761.46	-1.896	1.6841	-1.6909	-54.614	-203.63	1539.90547	-1.0503	0.96924	-0.9292	-60.0111	62.25	53.721	NaN	NaN	NaN
2.594	-0.408000000000001	86.38	519.966	-0.3374	0.44971	-0.32129	-50.631	-95.105	1781.178	-1.7937	1.6545	-1.6873	-69.707	-158.2	1527.1182	-1.2593	0.96045	-0.91553	-63.804	26.3924	47.861	NaN	NaN	NaN
2.596	-34.222	89.972	530.427	-0.37676	0.40674	-0.36465	-59.561	-101.916	1793.9353	-1.6855	1.6309	-1.6777	-48.441	-199.08	1520.4574	-1.6636	1.0103	-0.96436	-57.337	30.516	44.98521	NaN	NaN	NaN
2.598	-22.012	96.008	528.075	-0.35937	0.44785	-0.30566	-84.493	-66.724	1807.573	-1.5522	1.6001	-1.6597	-23.92	-193.773	1513.013	-1.8716	1.1016	-1.045	-50.866	8.81	63.4479	NaN	NaN	NaN
2.6	-3.11499999999999	99.385	533.563	-0.38593	0.42676	-0.33496	-101.799	-106.99	1819.307	-1.502	1.5938	-1.6514	-39.7653	-271.584	1541.152	-1.9897	1.2056	-1.1323	-76.264	29.2851	20.508	NaN	NaN	NaN
2.602	7.36500000000001	110.836	523.346	-0.404	0.4003	-0.34522	-124.943	-48.3555	1787.255	-1.418	1.5723	-1.6172	-60.135	-296.114	1560.99	-2.0093	1.3188	-1.2339	-70.2657	6.122	33.2338	NaN	NaN	NaN
2.604	-12.369	102.855	528.998	-0.37061	0.46338	-0.28174	-141.771	-49.96586235	1773.206	-1.3799	1.5615	-1.5869	1.96099999999999	-382.17	1620.651	-1.9844	1.3555	-1.2842	-49.836	7.3396	41.3666	NaN	NaN	NaN
2.606	-5.771	106.021	537.281	-0.42744	0.38134	-0.36358	-127.97085	-51.655	1748.07541	-1.353	1.5464	-1.5522	60.847	-375.719	1639.486	-1.9199	1.377	-1.3555	-77.6459	-7.12288	47.7436	NaN	NaN	NaN
2.608	3.74799999999999	107.382	553.577	-0.40127	0.42041	-0.30928	-106.7157	15.1679	1683.684	-1.3394	1.5356	-1.5034	103.918	-365.536	1687.345	-1.8764	1.3491	-1.3853	-38.675	-21.12294	69.6762	NaN	NaN	NaN
2.61	4.50299999999999	115.118	555.625	-0.41104	0.38643	-0.35068	-65.888	-23.7555	1651.097	-1.3359	1.5313	-1.4805	84.2707	-299.995	1733.541	-1.8477	1.2998	-1.3867	-53.6759	-6.9821	109.5373	NaN	NaN	NaN
2.612	-4.053	116.205	555.335	-0.421	0.36318	-0.35459	-54.252	29.272	1604.128	-1.3262	1.5137	-1.4385	8.472	-299.459	1791.663	-1.8594	1.2539	-1.3691	-46.86	-10.8943	138.0548	NaN	NaN	NaN
2.614	-7.47000000000001	105.506	558.824	-0.40186	0.39111	-0.34131	-67.3504	35.2031	1589.399	-1.315	1.4946	-1.4097	-73.073	-256.6842	1859.453	-1.8843	1.2407	-1.3647	-67.86868	20.3627	159.7156	NaN	NaN	NaN
2.616	-3.16199999999999	108.423	563.301	-0.44932	0.31591	-0.38545	-39.954	12.2814	1595.4604	-1.2983	1.4712	-1.3921	-69.0141	-209.347	1902.107	-1.9644	1.2524	-1.3784	-56.192	15.278	174.862	NaN	NaN	NaN
2.618	-4.753	128.088	567.428	-0.4458	0.35517	-0.36162	-13.23	68.775	1548.212	-1.2651	1.4419	-1.355	-72.653	-116.322	1875.037	-2.0385	1.2837	-1.4057	-79.077	50.748	286.529	NaN	NaN	NaN
2.62	-6.05	144.19	563.419	-0.49971	0.28681	-0.41162	0.195	36.502	1510.16	-1.251	1.416	-1.3477	-77.7746	-56.452	1858.161	-2.1172	1.3359	-1.4473	-87.764	73.3368	473.155	NaN	NaN	NaN
2.622	-5.146	141.457	583.208	-0.50674	0.33311	-0.38545	9.367	73.258	1468.003	-1.2183	1.3774	-1.3149	-73.519	-26.301	1828.268	-2.1978	1.436	-1.5151	-81.034	119.342	635.013	NaN	NaN	NaN
2.624	8.56399999999999	138.54	583.423	-0.56152	0.27539	-0.43555	-18.353	94.706	1460.151	-1.2006	1.3452	-1.2885	-89.2093	-45.57	1832.483	-2.2261	1.4888	-1.5503	-20.709	73.326	773.149	NaN	NaN	NaN
2.626	-1.41399999999999	146.23	585.505	-0.56777	0.35108	-0.40547	-31.435	55.248	1471.2149	-1.189	1.3091	-1.2651	-62.303	-71.59	1820.5658	-2.2383	1.6016	-1.6211	-52.772	95.344	938.795	NaN	NaN	NaN
2.628	-26.964	143.265	588.573	-0.61758	0.3248	-0.44824	-21.148	115.471	1452.3667	-1.1636	1.2661	-1.23	-38.744	-90.971	1846.534	-2.1853	1.6809	-1.6589	-67.183	117.084	1125.424	NaN	NaN	NaN
2.63	-14.426	145.651	603.036	-0.61914	0.39903	-0.42363	10.089	69.415	1435.5927	-1.1514	1.252	-1.2148	-48.192	-105.884	1872.9479	-2.103	1.7388	-1.6851	-63.566	94.302	1266.026	NaN	NaN	NaN
2.632	-5.79400000000001	126.536	607.453	-0.66103	0.38858	-0.46084	26.012	68.781	1379.18	-1.1089	1.2095	-1.1841	-56.217	-116.364	1895.0763	-1.9609	1.7793	-1.6934	-104.44	104.103	1376.0303	NaN	NaN	NaN
2.634	-19.614	143.833	588.014	-0.66553	0.46338	-0.42822	7.172	92.226	1348.4194	-1.0772	1.1822	-1.1572	-87.166	-113.694	1884.6047	-1.8867	1.7734	-1.6816	-131.059	70.862	1398.511	NaN	NaN	NaN
2.636	-25.373	146.128	586.77	-0.71631	0.45264	-0.46895	6.65	85.799	1330.697	-1.0366	1.1499	-1.1304	-100.97	-100.4838	1834.204	-1.7593	1.7251	-1.6304	-107.097	16.392	1410.806	NaN	NaN	NaN
2.638	-13.385	163.582	610.541	-0.71435	0.51221	-0.43897	7.719	167.657	1286.0671	-0.98633	1.123	-1.0957	-137.0033	-112.37	1810.316	-1.686	1.6548	-1.5732	-90.645	-66.1003	1378.723	NaN	NaN	NaN
2.64	-16.028	158.855	608.55	-0.76123	0.49659	-0.48349	17.281	148.267	1271.652	-0.96777	1.1074	-1.0801	-173.403	-102.258	1793.779	-1.6309	1.5752	-1.5137	-147.903	-81.289	1356.267	NaN	NaN	NaN
2.642	-30.771	157.902	614.672	-0.76299	0.55244	-0.44795	16.899	145.423	1240.145	-0.92139	1.0728	-1.0464	-156.068	-102.092	1770.181	-1.5776	1.4692	-1.4253	-111.6541	-105.881	1370.459	NaN	NaN	NaN
2.644	-4.568	145.328	612.586	-0.81396	0.52393	-0.49268	14.56975	192.925	1187.6606	-0.88769	1.0498	-1.0141	-135.419	-62.724	1720.7324	-1.5542	1.4185	-1.3823	-80.395	-121.331	1342.48	NaN	NaN	NaN
2.646	-18.354	147.173	626.782	-0.79453	0.58653	-0.43877	-6.443	161.077	1163.683	-0.85938	1.0254	-0.98438	-75.665	-52.17232	1683.7	-1.5093	1.3579	-1.3276	-69.98047	-199.605	1329.2537	NaN	NaN	NaN
2.648	-7.137	158.163	627.77	-0.82813	0.55078	-0.47812	-43.906	241.66	1106.474	-0.81006	0.9917	-0.94287	-59.24	-18.6301	1624.217	-1.4648	1.3262	-1.295	-57.028	-228.311	1295.32	NaN	NaN	NaN
2.65	-16.812	160.931	623.823	-0.80118	0.61758	-0.42422	-67.3624	208.813	1083.1847	-0.78857	0.96729	-0.92529	-42.131	-36.742	1584.6668	-1.4199	1.3047	-1.2646	-44.885	-279.004	1313.5347	NaN	NaN	NaN
2.652	-2.373	165.645	616.395	-0.82217	0.57549	-0.454	-61.1103	177.884	1050.353	-0.74023	0.91992	-0.88086	-46.308	30.889	1532.8238	-1.3516	1.2813	-1.2383	-55.41	-244.783	1386.5165	NaN	NaN	NaN
2.654	-7.46299999999999	168.096	617.527	-0.77881	0.64307	-0.3999	-56.9327	201.413	972.634	-0.69849	0.87915	-0.84399	-31.941	48.875	1501.305	-1.3188	1.2661	-1.2241	-119.1109	-200.067	1429.755	NaN	NaN	NaN
2.656	-8.15799999999999	180.818	614.941	-0.79648	0.58496	-0.44121	-65.5495	136.76	957.8205	-0.65332	0.83984	-0.80664	-0.279000000000003	115.155	1482.346	-1.2612	1.2329	-1.1929	-84.718	-184.69	1430.7008	NaN	NaN	NaN
2.658	-9.853	182.589	608.599	-0.74209	0.63721	-0.39717	-48.80313	203.9771	904.075	-0.59912	0.78467	-0.76123	-27.263	99.75	1456.824	-1.2343	1.1982	-1.1704	-117.985	-205.83	1426.0105	NaN	NaN	NaN
2.66	-3.684	171.657	619.331	-0.75967	0.57822	-0.4417	-64.179	188.899	895.4316	-0.56836	0.75879	-0.73633	-9.646	147.139	1431.02	-1.2183	1.1597	-1.146	-93.234	-269.706	1431.657	NaN	NaN	NaN
2.662	4.83199999999999	174.765	623.599	-0.70244	0.61728	-0.39854	-60.1854	179.334	828.644	-0.51025	0.71143	-0.68701	-36.622	104.735	1416.736	-1.2246	1.1035	-1.1152	-104.5016	-292.989	1465.889	NaN	NaN	NaN
2.664	-10.396	183.945	623.087	-0.73047	0.54492	-0.46289	-17.419	227.571	757.535	-0.47046	0.67675	-0.65845	-66.606	147.068	1382.825	-1.231	1.0786	-1.0972	-113.2234	-365.942	1532.0276	NaN	NaN	NaN
2.666	3.428	181.218	600.389	-0.66914	0.59903	-0.40625	-18.578	157.587	745.2081	-0.42773	0.64258	-0.62988	-60.954	123.479	1365.021	-1.2437	1.0278	-1.0737	-91.44742	-342.979	1525.9311	NaN	NaN	NaN
2.668	0.442	171.347	611.172	-0.68613	0.53994	-0.45254	-12.003	188.321	701.459	-0.37891	0.60156	-0.58301	-43.786	193.647	1334.9535	-1.2341	0.99534	-1.0466	-18.167	-386.078	1535.8509	NaN	NaN	NaN
2.67	0.790999999999997	173.671	609.767	-0.6498	0.5958	-0.40215	-20.723	186.63	685.5027	-0.34912	0.56689	-0.54932	10.042	185.913	1284.939	-1.2114	0.96533	-1.0249	2.245	-359.274	1529.245	NaN	NaN	NaN
2.672	-11.964	181.69	606.46	-0.66836	0.56406	-0.43184	-17.725	167.9253	657.942	-0.30225	0.50586	-0.50391	23.559	232.62	1231.04	-1.1519	0.94189	-0.99951	45.399	-339.25	1583.919	NaN	NaN	NaN
2.674	-25.877	183.845	599.225	-0.6416	0.62793	-0.39844	-17.227	241.298	582.387	-0.27295	0.46948	-0.47631	5.504	179.43	1229.281	-1.1128	0.92627	-0.98682	36.558	-275.413	1670.248	NaN	NaN	NaN
2.676	-5.692	181.369	597.032	-0.65361	0.62832	-0.40947	-25.166	167.7	557.4465	-0.2373	0.42773	-0.44531	-23.398	198.696	1210.406	-1.0288	0.89893	-0.95947	-20.782	-264.609	1754.924	NaN	NaN	NaN
2.678	-18.746	160.494	601.092	-0.64492	0.675	-0.39961	-30.324	194.855	489.423	-0.19043	0.37793	-0.40283	-22.447	164.973	1185.313	-0.97094	0.87085	-0.93433	-66.989	-195.4852	1780.099	NaN	NaN	NaN
2.68	-21.67	152.316	615.299	-0.64492	0.70469	-0.39883	-21.455	187.361	440.687	-0.17188	0.35645	-0.3916	-14.061	228.809	1126.09	-0.91602	0.83691	-0.90625	-82.1617	-149.99	1827.017	NaN	NaN	NaN
2.682	-33.866	131.387	614.74	-0.64785	0.72129	-0.40566	17.399	139.2982	444.831	-0.12207	0.29639	-0.34131	-20.166	207.8436	1080.142	-0.85596	0.79541	-0.86475	-69.115	-88.601	1832.107	NaN	NaN	NaN
2.684	-29.091	125.747	627.47	-0.64648	0.76563	-0.39258	17.095	205.0019	386.918	-0.083985	0.25293	-0.3164	-43.702	247.876	1015.93914	-0.83154	0.76611	-0.84717	-116.6374	-30.155	1789.965	NaN	NaN	NaN
2.686	-35.483	123.589	654.02	-0.6584	0.76035	-0.4127	1.21400000000001	127.709	393.1838	-0.04834	0.20996	-0.28906	-64.565	219.914	977.596	-0.78906	0.72168	-0.80664	-92.376	-16.42	1784.702	NaN	NaN	NaN
2.688	-73.39	134.764	672.33	-0.66651	0.81015	-0.42041	11.332	157.21963	338.969	-0.01123	0.17334	-0.27539	-78.937	264.823	894.958	-0.76074	0.68603	-0.77197	-114.9374	-4.54299999999999	1742.016	NaN	NaN	NaN
2.69	-51.716	130.026	712.99	-0.68682	0.79531	-0.42509	-5.11799999999999	179.429	318.3221	0.010254	0.14648	-0.2627	-71.077	231.53	866.2454	-0.72998	0.66064	-0.72998	-89.642	-55.57	1765.029	NaN	NaN	NaN
2.692	-51.921	134.295	759.62	-0.71758	0.82402	-0.45898	-14.444	139.1984	314.287	0.057617	0.088867	-0.21875	-57.6939	240.4525	821.449	-0.70117	0.60986	-0.71045	-92.1687	-50.308	1811.159	NaN	NaN	NaN
2.694	-18.223	144.6931	813.17	-0.75146	0.82471	-0.4624	3.266	205.361	281.9154	0.088624	0.054931	-0.19604	-62.3185	191.715	796.028	-0.67773	0.58398	-0.69336	-80.92	-81.272	1837.427	NaN	NaN	NaN
2.696	-44.113	162.205	889.88	-0.78574	0.83691	-0.4874	-36.098	141.45	290.544	0.10938	0.037109	-0.19824	-34.083	249.682	713.107	-0.62598	0.5332	-0.6582	-70.083	-59.676	1860.513544	NaN	NaN	NaN
2.698	-25.87	167.642	961.49	-0.83935	0.86299	-0.50225	-60.589	151.114	246.9414	0.13525	0.0043945	-0.18115	-22.24	229.5028	689.1641	-0.58814	0.50953	-0.62817	-85.081	-53.325	1850.089	NaN	NaN	NaN
2.7	-13.178	165.239	1047.6	-0.86475	0.87041	-0.51123	-72.8228	157.292	225.356	0.14697	-0.00048828	-0.17969	-30.323	255.59	622.48	-0.54834	0.48047	-0.60107	-116.926	-17.143	1827.286	NaN	NaN	NaN
2.702	-11.364	163.708	1122.25	-0.92823	0.88037	-0.57295	-57.654	79.686	239.244	0.18213	-0.028809	-0.14502	-37.1493	188.792	595.529	-0.48535	0.43604	-0.56494	-156.365	-18.3825	1833.345	NaN	NaN	NaN
2.704	-17.718	137.837	1207.09	-0.93701	0.92041	-0.56006	-65.8185	139.777	182.1676	0.18994	-0.041016	-0.1377	-31.193	208.087	536.784	-0.45508	0.41602	-0.54492	-162.9256	-17.1067	1832.784	NaN	NaN	NaN
2.706	-1.004	103.318	1285.65	-1.0031	0.89316	-0.64883	-85.84369	88.0422	168.465	0.19141	-0.043457	-0.14355	-20.188	180.0024	493.099	-0.39893	0.37354	-0.51123	-183.975	-8.528	1816.933	NaN	NaN	NaN
2.708	11.984	75.037	1360.32	-1.0346	0.95352	-0.65508	-75.126	113.5305	132.8915	0.20557	-0.058594	-0.13135	-7.883	211.7585	440.216	-0.35962	0.33374	-0.49097	-136.903	-41.804	1802.97	NaN	NaN	NaN
2.71	-38.749	35.68	1402.78	-1.0967	0.92265	-0.72187	-80.5263	146.653	100.669	0.19384	-0.052735	-0.13574	-9.97300000000001	180.059	428.902	-0.32031	0.29883	-0.46875	-115.704	-21.756	1717.92086	NaN	NaN	NaN
2.712	-41.653	-28.5	1425.4	-1.1536	0.97647	-0.75537	-70.428	64.421	132.943	0.19727	-0.05127	-0.12354	-30.291	201.1521	363.316	-0.271	0.25146	-0.43701	-87.717	-40.199	1634.645	NaN	NaN	NaN
2.714	-40.72	-94.165	1427.59	-1.2188	0.97168	-0.77832	-72.505	115.50587	87.7845	0.18848	-0.038086	-0.10938	-32.739	164.1379	335.7331	-0.24463	0.22607	-0.42383	-73.522	26.602	1583.344	NaN	NaN	NaN
2.716	-32.094	-147.73	1407.41	-1.2836	1.0115	-0.81582	-70.407	69.824	83.1297	0.18652	-0.035645	-0.10791	-21.515	191.0295	290.475	-0.20508	0.18311	-0.39258	-90.847	34.836	1571.6585	NaN	NaN	NaN
2.718	-46.223	-185.626	1391.68	-1.3536	1.0567	-0.81738	-74.989	67.22764	67.4411	0.16211	-0.02002	-0.11084	-16.424	161.309	303.0306	-0.17602	0.14526	-0.36767	-74.912	75.2559	1559.4385	NaN	NaN	NaN
2.72	-49.305	-223.337	1336.01	-1.3891	1.1148	-0.80684	-83.7625	120.367	48.733	0.15796	-0.011474	-0.11426	16.102	199.0418	280.1504	-0.14893	0.10986	-0.34863	-5.235	72.082	1527.9624	NaN	NaN	NaN
2.722	-27.406	-243.733	1297.39	-1.4412	1.194	-0.81729	-95.9381	41.578	64.471	0.14893	0.00048828	-0.10059	-5.206	178.085	261.4121	-0.1167	0.069336	-0.31787	4.233	126.0458	1463.534	NaN	NaN	NaN
2.724	-34.136	-258.309	1266.67	-1.439	1.2876	-0.76904	-66.918	89.528	41.393	0.13672	0.0083008	-0.097656	-14.888	214.525	205.541	-0.10303	0.049316	-0.30322	-14.503	155.5832	1445.703	NaN	NaN	NaN
2.726	-38.406	-239.452	1210.36	-1.436	1.3378	-0.77256	-61.023	44.0366	37.2506	0.13477	0.010254	-0.10156	-46.045	167.2758	183.445	-0.086914	0.020996	-0.2832	-15.257	180.622	1422.148	NaN	NaN	NaN
2.728	-48.805	-218.696	1161.14	-1.3895	1.4243	-0.72998	-32.825	13.074	30.4438	0.13184	0.014648	-0.104	-28.332	164.938	198.1707	-0.06543	0.00097656	-0.26563	-65.2084	203.796	1392.4793	NaN	NaN	NaN
2.73	-56.661	-200.387	1141.878	-1.3177	1.4399	-0.69092	-12.117	50.8773	9.569	0.12939	0.014893	-0.097655	-52.597	128.955	190.081	-0.055664	-0.0097656	-0.25537	-41.549	192.569	1362.2289	NaN	NaN	NaN
2.732	-57.585	-172.385	1109.411	-1.2371	1.4338	-0.65175	-20.736	-20.9753	45.8239	0.14063	0.0078125	-0.086426	-36.465	159.4	160.9946	-0.040527	-0.024414	-0.24365	-17.526	226.858	1320.7288	NaN	NaN	NaN
2.734	-99.6705	-140.175	1089.108	-1.1606	1.4087	-0.5708	1.877	35.9305	11.692	0.14746	0.0063477	-0.083008	-53.059	138.236	149.1847	-0.029785	-0.026611	-0.23096	16.965	187.052	1299.6896	NaN	NaN	NaN
2.736	-102.8152	-126.068	1078.108	-1.1094	1.317	-0.49473	16.836	31.509	13.97879	0.14941	0.003418	-0.083008	-56.249	137.152	135.221	-0.016113	-0.035156	-0.22119	-25.472	235.662	1251.211978	NaN	NaN	NaN
2.738	-101.876	-137.309	1063.27	-1.0918	1.2364	-0.41543	22.583	-0.895	34.982	0.1582	-0.0039063	-0.081543	-106.043	81.83	134.447	-0.012207	-0.033203	-0.21436	-12.629	229.273	1197.8696	NaN	NaN	NaN
2.74	-129.864	-155.43	1057.96	-1.0996	1.141	-0.33496	-3.821	50.234	9.474	0.16943	-0.0075685	-0.07373	-110.6241	86.047	125.49	-0.0024414	-0.027832	-0.20215	-34.736	249.034	1169.45	NaN	NaN	NaN
2.742	-128.0348	-177.299	1045.0376	-1.1186	1.0475	-0.26465	-14.861	-4.56501	72.461	0.17725	-0.020508	-0.069824	-93.0958	59.9879	98.2691	0.0048828	-0.02832	-0.19482	-6.189	247.603	1119.3247	NaN	NaN	NaN
2.744	-126.039	-214.478	1023.9204	-1.1655	0.95361	-0.23535	-23.584	58.202	50.5577	0.19385	-0.02832	-0.061523	-45.741	74.748	90.4228	0.016602	-0.019043	-0.18774	8.678	284.423	1077.9675	NaN	NaN	NaN
2.746	-123.999	-262.788	1035.1165	-1.1887	0.89785	-0.17324	-7.54	54.215	46.9185	0.20605	-0.035645	-0.052246	-54.398	39.9097	67.858	0.019531	-0.0087891	-0.18115	-15.329	304.0122	1062.36	NaN	NaN	NaN
2.748	-129.009	-312.748	1052.2853	-1.2398	0.8001	-0.17373	-20.77	-1.014	46.0852	0.21094	-0.055664	-0.043457	-82.575	49.815	45.1367	0.021973	0.0043945	-0.1748	-25.999	319.709	1028.71	NaN	NaN	NaN
2.75	-144.697	-329.365	1055.4695	-1.2738	0.77393	-0.15772	-27.611	44.8808	-0.216999999999999	0.20361	-0.060059	-0.045898	-97.059	36.2254	33.0025	0.026855	0.0073242	-0.16895	-58.6504	340.498	993.848	NaN	NaN	NaN
2.752	-137.985	-340.984	1058.6262	-1.3184	0.75069	-0.15683	-64.924	-2.6847	15.1903	0.19531	-0.069824	-0.038574	-63.384	46.746	45.975	0.022461	0.017578	-0.1626	-81.0507	325.391	942.226	NaN	NaN	NaN
2.754	-138.461	-328.471	1074.835	-1.3379	0.76953	-0.14355	-32.944	43.688	1.171	0.20166	-0.088379	-0.019043	-67.689	10.971	35.549	0.024902	0.014404	-0.15259	-90.847	347.377	883.113	NaN	NaN	NaN
2.756	-165.26	-311.479	1097.2456	-1.3951	0.80761	-0.20567	-36.872	66.456	6.8918	0.19629	-0.092773	-0.017578	-41.438	13.6253	47.98	0.026367	0.015137	-0.14795	-59.41	313.05	845.2971	NaN	NaN	NaN
2.758	-180.6265	-284.96	1101.9047	-1.4042	0.91142	-0.20107	-73.9298	14.165	29.974	0.18213	-0.092773	-0.026855	-56.9529	1.125	22.076	0.033203	0.0063477	-0.13232	-75.3727	317.393	783.391	NaN	NaN	NaN
2.76	-171.584	-260.0632	1122.878	-1.4425	0.9708	-0.2503	-52.954	65.4194	6.033	0.19117	-0.092041	-0.022705	-37.863	35.37953	18.724	0.033203	0.0058594	-0.12793	-58.423	275.8913	719.06	NaN	NaN	NaN
2.762	-172.049	-220.472	1144.684	-1.4423	1.0909	-0.24404	-55.672	11.76	31.778	0.20361	-0.087402	-0.012695	-48.501	22.8254	13.274	0.038574	0.0024414	-0.11084	-91.563	256.63252	665.15	NaN	NaN	NaN
2.764	-201.7251	-185.033	1135.458	-1.4805	1.1133	-0.30176	-63.317	34.1451	27.1502	0.20654	-0.083984	-0.011719	-28.152	26.661	14.4465	0.041504	-0.0021972	-0.10498	-58.5656	229.02	628.809	NaN	NaN	NaN
2.766	-180.773	-145.465	1125.3141	-1.4889	1.2107	-0.31709	-60.8611	53.7439	24.8577	0.21582	-0.083008	-0.0068359	-25.612	6.146	-21.759	0.055664	-0.014648	-0.088867	-48.016	226.934	570.8064	NaN	NaN	NaN
2.768	-157.139	-116.79	1120.463	-1.5304	1.2677	-0.36035	-88.77811	8.7147	46.8951	0.23877	-0.077637	0.00048828	6.471	30.833	-17.7546	0.0625	-0.020508	-0.083984	-21.35	235.15	542.908	NaN	NaN	NaN
2.77	-139.917	-108.9	1118.541	-1.5214	1.3673	-0.36309	-79.91913	76.243	-2.494	0.23877	-0.066162	0.0024414	18.789	34.2377	-9.9205	0.078125	-0.02832	-0.075195	-42.451	214.4487	496.7672	NaN	NaN	NaN
2.772	-143.594	-104.783	1097.464	-1.5394	1.4079	-0.43281	-72.8631	23.3933	9.45	0.24268	-0.062988	-0.00048828	1.576	26.7178	40.7996	0.095215	-0.040039	-0.061523	-34.091	199.878	457.332	NaN	NaN	NaN
2.774	-130.271	-121.4624	1093.093	-1.4805	1.5039	-0.43408	-51.482	30.4655	29.28349	0.23877	-0.053711	-0.012695	-20.362	16.2948	38.254	0.11328	-0.044434	-0.049072	-28.508	194.6961	416.057	NaN	NaN	NaN
2.776	-151.964	-145.9237	1100.0359	-1.4617	1.4969	-0.5209	-55.904	50.441	16.4513	0.2373	-0.052246	-0.010254	-44.081	30.75781	36.589	0.12988	-0.052246	-0.040039	-31.973	211.1472	370.682	NaN	NaN	NaN
2.778	-139.733	-155.21759	1108.674	-1.3738	1.5734	-0.52207	-60.689	3.355	36.4168	0.23096	-0.049316	-0.013672	-30.027	71.803	-3.974	0.14209	-0.057617	-0.033691	-7.708	192.6376	335.5178	NaN	NaN	NaN
2.78	-149.68	-180.9359	1113.686	-1.3281	1.5434	-0.58027	-25.676	64.992	-0.221	0.22681	-0.039551	-0.013184	-17.743	84.306	17.51	0.15039	-0.05957	-0.027832	-39.852	194.373	301.7197	NaN	NaN	NaN
2.782	-139.163	-174.2241	1086.025	-1.2296	1.5888	-0.56396	-35.952	40.4671	7.401	0.21924	-0.031738	-0.0092773	-24.369	71.36	28.004	0.17773	-0.067383	-0.020508	-25.727	163.481	255.5053	NaN	NaN	NaN
2.784	-149.053	-199.767	1085.693	-1.1826	1.5449	-0.57422	-21.348	29.5229	41.8265	0.21436	-0.02002	-0.0068359	-60.058	55.106	40.3097	0.19361	-0.071778	-0.018066	-27.873	177.749	223.492	NaN	NaN	NaN
2.786	-167.648	-189.6708	1067.658	-1.0924	1.5412	-0.53457	0.786999999999999	72.73	8.7429	0.20605	-0.019043	-0.0063477	-54.183	54.766	28.2412	0.21826	-0.078613	-0.0092773	10.699	173.5731	206.499	NaN	NaN	NaN
2.788	-179.6876	-178.339	1034.197	-1.0571	1.5054	-0.5168	-9.692	31.713	26.1057	0.19824	-0.0073242	-0.003418	-57.8009	42.8047	54.876	0.2417	-0.083008	-0.0024414	-20.665	161.7544	184.9921	NaN	NaN	NaN
2.79	-143.582	-161.91	996.7994	-0.99179	1.4707	-0.48437	-2.17899999999999	83.818	29.367447	0.1958	-0.0036621	-0.0061035	-46.346	31.718	38.913	0.24902	-0.083496	-0.003418	-22.837	175.146	161.931326	NaN	NaN	NaN
2.792	-123.79	-146.767	961.89177	-0.94785	1.4447	-0.45566	-0.971	53.813	41.7381	0.18848	-0.0029297	-0.0078125	-63.741	25.2302	67.6774	0.26709	-0.095215	0.00097656	-28.098	157.2635	128.767	NaN	NaN	NaN
2.794	-139.399	-125.037	932.9665	-0.90674	1.3911	-0.45801	-20.023	19.0531	74.893	0.18018	-0.0014648	-0.0014648	-50.692	54.34	20.26	0.27588	-0.09863	-0.00024414	-19.707	163.8365	103.695	NaN	NaN	NaN
2.796	-134.278	-94.5874	911.83555	-0.83066	1.3966	-0.38926	-3.605	56.503	36.456	0.1709	-0.003418	-0.0053711	-61.96	68.243	26.86	0.28467	-0.10938	1.0408e-13	-26.902	144.172	95.027	NaN	NaN	NaN
2.798	-119.032	-69.241	887.3251	-0.80352	1.3191	-0.4126	-13.325	-0.506499999999999	46.132	0.15869	-0.01416	-0.003418	-68.2975	82.4261	34.0042	0.27979	-0.11475	0.0024414	-42.427	160.571	116.096	NaN	NaN	NaN
2.8	-115.5	-62.006	856.269	-0.71836	1.3441	-0.3419	-10.226	40.0156	21.0771	0.14575	-0.020507	-0.0051269	-104.386	46.094	54.1383	0.27686	-0.11914	0.0019531	-59.619	142.774	112.165	NaN	NaN	NaN
2.802	-128.362	-37.633	833.007	-0.69609	1.2647	-0.35625	-35.75	22.9681	15.833	0.1333	-0.027344	-0.0083008	-89.5124	34.4347	40.7636	0.26807	-0.12744	0.0029297	-100.463	143.964	105.445	NaN	NaN	NaN
2.804	-137.957	-38.649	816.687	-0.63428	1.271	-0.29883	-45.105	2.112	44.384	0.11768	-0.036621	-0.012207	-84.4554	25.1714	57.3861	0.25659	-0.1294	0.0024414	-88.4541	105.39	102.204	NaN	NaN	NaN
2.806	-131.871	-46.677	798.316	-0.62637	1.2061	-0.31709	-18.24	62.3296	15.7729	0.11328	-0.039551	-0.016602	-62.585	47.453	53.6679	0.24463	-0.12793	-0.00097656	-128.207	75.467	81.8834	NaN	NaN	NaN
2.808	-127.264	-54.478	760.789	-0.56406	1.2226	-0.25157	-34.994	2.952	57.408	0.104	-0.045898	-0.023438	-61.4535	22.4849	80.434	0.22998	-0.1167	-0.0083008	-63.124	62.6077	84.961	NaN	NaN	NaN
2.81	-139.5015	-54.011	745.104	-0.57773	1.1222	-0.29961	-37.635	33.2145	55.469	0.10083	-0.045655	-0.027832	-43.417	21.8567	46.697	0.21533	-0.10596	-0.012207	-90.1472	61.0212	59.3283	NaN	NaN	NaN
2.812	-144.9322	-61.088	727.528	-0.50967	1.1532	-0.22617	-57.924	34.5507	33.5955	0.093262	-0.047852	-0.033203	-85.5419	0.4975	29.0069	0.20459	-0.09668	-0.016113	-65.108	52.512	39.56138	NaN	NaN	NaN
2.814	-111.12	-69.2478	732.0971	-0.50977	1.0449	-0.26514	-80.6759	7.924	50.304	0.089355	-0.051758	-0.040039	-27.94	35.277	-9.9527	0.20679	-0.080811	-0.016846	-88.5236	12.6059	22.485	NaN	NaN	NaN
2.816	-104.352	-61.865	727.716	-0.45108	1.0625	-0.22178	-66.7525	70.68	13.829	0.085938	-0.054199	-0.041992	7.698	19.0028	24.246	0.20166	-0.071289	-0.022949	-72.919	-0.977	30.3292	NaN	NaN	NaN
2.818	-116.304	-43.347	693.17	-0.44638	0.99733	-0.23936	-69.1449	24.266	27.7518	0.083008	-0.058105	-0.045898	1.691	38.893	14.85	0.19727	-0.059082	-0.017578	-69.6221	-6.079	37.9596	NaN	NaN	NaN
2.82	-104.882	-67.519	691.585	-0.37998	1.0036	-0.1917	-70.354	24.7152	28.018	0.088378	-0.061523	-0.052735	-31.112	5.771288	25.104	0.20068	-0.054199	-0.019531	-37.172	20.41	62.846	NaN	NaN	NaN
2.822	-61.268	-62.489	669.47135	-0.37217	0.93857	-0.225	-70.5556	37.5413	-3.635	0.089355	-0.067871	-0.055664	-2.749	34.4	11.9145	0.19189	-0.05127	-0.02002	-22.585	27.1089	51.6483	NaN	NaN	NaN
2.824	-74.366	-38.243	663.9627	-0.32617	0.91992	-0.21289	-80.3947	5.397	18.9992	0.094238	-0.080078	-0.06543	-45.9934	19.0106	33.722	0.18896	-0.055664	-0.025635	-78.127	25.9576	39.0605	NaN	NaN	NaN
2.826	-111.419	-13.0564	649.723	-0.2957	0.88574	-0.20097	-50.938	69.407	1.067	0.098633	-0.080078	-0.071777	-26.582	34.1206	52.191	0.18262	-0.061035	-0.02832	-66.111	27.0056	36.9558	NaN	NaN	NaN
2.828	-95.356	-25.46	618.58	-0.2919	0.79804	-0.24218	-56.736	20.3506	35.6672	0.1001	-0.088379	-0.078125	-18.571	13.4455	52.75	0.1748	-0.069336	-0.029785	-66.9048	38.317	16.8126	NaN	NaN	NaN
2.83	-106.188	-34.991	592.3323	-0.229	0.81016	-0.19141	-68.279	26.1185	31.7388	0.10108	-0.094238	-0.09253	-3.073	42.5321	19.8839	0.16064	-0.075684	-0.031738	-0.925999999999995	32.3281	24.778	NaN	NaN	NaN
2.832	-104.931	-12.176	550.615	-0.23125	0.74893	-0.21279	-48.48	37.655	3.111	0.10205	-0.097168	-0.10547	-19.719	35.06	4.449	0.13721	-0.078125	-0.032227	-14.193	20.5103	17.9754	NaN	NaN	NaN
2.834	-136.359	11.11	537.5571	-0.21729	0.68018	-0.23486	-24.772	-19.3675	38.6084	0.098633	-0.099121	-0.12012	-23.561	52.245	15.462	0.12134	-0.086182	-0.036133	-18.821	15.1524	7.8245	NaN	NaN	NaN
2.836	-106.04	21.3744	535.303	-0.14629	0.72197	-0.16602	-13.658	49.6842	20.8726	0.095215	-0.094238	-0.1333	-46.374	17.894	22.16189	0.10107	-0.086426	-0.036133	-26.504	-1.4184	-1.554	NaN	NaN	NaN
2.838	-105.909	11.2921	506.1595	-0.15918	0.6458	-0.20986	-28.525	22.6051	33.5654	0.083008	-0.09082	-0.15381	-25.922	35.415	-9.2434	0.074707	-0.088379	-0.044922	-5.303	29.1939	-13.9048	NaN	NaN	NaN
2.84	-88.876	9.4927	464.703	-0.14004	0.59541	-0.22197	-31.575	28.4998	37.91369	0.076172	-0.084473	-0.17578	-39.413	14.035	-0.0399999999999991	0.063477	-0.091797	-0.052734	-6.402	31.7098	-0.3818	NaN	NaN	NaN
2.842	-112.807	-0.0640999999999998	446.865	-0.081347	0.62784	-0.16865	6.451	60.394	-8.34	0.064941	-0.076172	-0.19873	-32.232	48.70257	18.6558	0.04248	-0.088379	-0.065918	-8.451	54.3143	23.849	NaN	NaN	NaN
2.844	-76.575	-2.0426	450.8902	-0.09082	0.56934	-0.19385	-15.564	17.1845	23.5269	0.057617	-0.060059	-0.23047	-49.071	43.292	40.7661	0.038819	-0.08667	-0.071533	-12.809	51.971	7.7453	NaN	NaN	NaN
2.846	-59.508	5.2054	450.3051	-0.088964	0.51259	-0.22734	-9.041	65.614	17.6648	0.049316	-0.05127	-0.24072	-88.9969	80.218	59.274	0.03125	-0.079102	-0.086426	-30.244	55.102	11.467	NaN	NaN	NaN
2.848	-83.896	7.94135	428.7323	-0.048633	0.51767	-0.18271	-1.262	36.096	32.0208	0.041016	-0.03418	-0.27588	-100.4857	67.0357	23.5215	0.032715	-0.075195	-0.10645	-35.184	54.623	18.978	NaN	NaN	NaN
2.85	-115.094	-2.323032	417.0441	-0.031445	0.5169	-0.15771	-15.816	27.1747	38.908	0.031982	-0.025635	-0.30517	-71.9349	68.5866	30.2394	0.032715	-0.072754	-0.11523	-45.532	60.051	52.348911	NaN	NaN	NaN
2.852	-100.043	-16.7855	407.7762	-0.051856	0.45488	-0.20166	12.076	65.774	12.542	0.01123	-0.016113	-0.33643	-75.4938	44.6835	36.954	0.037598	-0.06543	-0.12939	-26.3	52.3302	62.677	NaN	NaN	NaN
2.854	-102.1845	2.5769	399.22	-0.037598	0.45166	-0.18311	-24.524	-3.40829	72.5769	-0.038574	-0.014648	-0.36963	-85.2948	55.175	52.658	0.032715	-0.068848	-0.14233	-71.0015	55.031	42.81	NaN	NaN	NaN
2.856	-117.60321	27.7444	381.6812	-0.02998	0.45596	-0.15352	-14.188	23.6169	78.921	-0.07666	-0.01123	-0.39063	-61.316	46.4317	20.918	0.023438	-0.077637	-0.15723	-44.426	62.1153	23.827	NaN	NaN	NaN
2.858	-103.457	21.785	368.6387	-0.038867	0.42295	-0.15684	-11.416	27.4096	99.7559	-0.16943	-0.015625	-0.42041	-55.609	60.75	36.35	0.0073242	-0.079102	-0.17236	-85.7094	52.415	1.852	NaN	NaN	NaN
2.86	-87.842	11.4854	344.104	-0.048633	0.396	-0.16699	-26.913	5.56965	147.3772	-0.27441	-0.037109	-0.45508	-79.9416	31.2008	21.4046	-0.0043945	-0.079102	-0.1792	-73.2535	70.0113	29.6439	NaN	NaN	NaN
2.862	-94.853	29.40955	336.036	-0.04873	0.39404	-0.15566	-22.6785	45.54	173.059	-0.34814	-0.036621	-0.4917	-66.3027	37.6616	44.802	-0.027344	-0.075195	-0.19824	-91.473	65.976	29.0303	NaN	NaN	NaN
2.864	-72.45	43.1645	320.5961	-0.056641	0.37939	-0.14209	-39.09134	-10.4831	268.38481	-0.53418	-0.038086	-0.58203	-46.288	18.638	32.5814	-0.044434	-0.06543	-0.21485	-71.5148	70.1227	39.8744	NaN	NaN	NaN
2.866	-65.414	33.4939	330.8633	-0.060156	0.36436	-0.14776	-24.1957	30.0069	371.253	-0.68872	-0.036621	-0.63965	-34.338	41.4603	29.822	-0.064453	-0.056641	-0.22754	-69.21	44.8427871	29.9258	NaN	NaN	NaN
2.868	-52.271	37.3511	330.589	-0.062597	0.35176	-0.1499	-4.412	52.4529	483.066	-0.89209	-0.012207	-0.71631	-28.859	53.1859	35.046	-0.09375	-0.043457	-0.24268	-81.296	32.8743	54.71815	NaN	NaN	NaN
2.87	-71.363	43.86091	315.1166	-0.066504	0.34394	-0.14561	-32.9406	48.708	672.289	-1.2134	0.038086	-0.82666	-41.389	55.642	88.469	-0.11011	-0.027832	-0.25586	-69.527	32.5236	48.287613	NaN	NaN	NaN
2.872	-74.841	68.106	305.7528	-0.076465	0.33242	-0.14336	-19.735	91.647491	805.911	-1.3887	0.074219	-0.87695	-39.873	38.007	61.327	-0.12744	-0.011719	-0.26953	-82.36734	43.366	66.249	NaN	NaN	NaN
2.874	-82.273	57.965	306.0132	-0.083008	0.32471	-0.14355	-64.884	43.305	955.605	-1.8159	0.22314	-1.0347	-38.124	20.6218	42.307	-0.1499	0.0097656	-0.29053	-33.999	57.5763	74.313	NaN	NaN	NaN
2.876	-74.064	64.639	306.6552	-0.086328	0.31777	-0.14444	-21.127	89.6546	1079.5774	-2.156	0.3877	-1.1863	-21.805	4.41229	20.15	-0.16113	0.018555	-0.29736	-76.6947	22.4551	54.347	NaN	NaN	NaN
2.878	-85.077	44.487	300.30202	-0.08955	0.30987	-0.14443	4.044	102.138	1199.527	-2.4897	0.61572	-1.3276	-15.546	8.3289	53.5468	-0.17383	0.042969	-0.32373	-50.548	10.063	30.8662	NaN	NaN	NaN
2.88	-117.0251	33.66	288.524	-0.094238	0.30361	-0.14756	-38.848	65.971	1342.838	-2.8315	1.1743	-1.437	4.238	22.83031	55.642	-0.17407	0.054443	-0.34082	-54.485	-8.5019	1.996	NaN	NaN	NaN
2.882	-79.729	30.4443	287.0964	-0.09541	0.30049	-0.15039	0.3998	90.442	1362.19	-2.9707	1.5176	-1.5117	-10.226	26.7386	40.2388	-0.17334	0.063965	-0.35889	-29.272	12.13	11.327	NaN	NaN	NaN
2.884	-69.809	29.6506	303.8876	-0.095703	0.29297	-0.15479	11.8799	5.402	1349.303	-3.1069	2.0786	-1.7827	-10.783	22.057	-7.7733	-0.1748	0.066895	-0.37939	-30.226	16.3686	30.272	NaN	NaN	NaN
2.886	-70.066	22.2265	288.997	-0.098731	0.29043	-0.15771	6.2017	-30.772	1316.45	-2.874	2.2403	-1.9327	-26.576	3.6207	7.009	-0.17676	0.069824	-0.38867	-6.853	22.4916	47.414	NaN	NaN	NaN
2.888	-81.266	18.226	282.196	-0.097559	0.28662	-0.15986	-5.1851	-36.5363	1296.584	-2.3223	2.1934	-1.9082	-6.211	9.079	38.1424	-0.18896	0.050781	-0.40869	-21.992	-5.795	12.7793	NaN	NaN	NaN
2.89	-54.934	25.506	274.9696	-0.095605	0.27959	-0.16103	-38.689	-103.852	1329.993	-1.3354	1.8188	-1.6606	-18.704	0.9443	90.2585	-0.21827	0.0354	-0.42676	-31.094	7.8615	22.715	NaN	NaN	NaN
2.892	-73.629	41.848	257.511	-0.093945	0.27823	-0.16377	-22.856	-62.7563	1311.743	-0.92383	1.5752	-1.5527	-3.82	27.4456	93.687	-0.25098	0.02002	-0.43555	-0.0410000000000039	20.6489	20.1289	NaN	NaN	NaN
2.894	-75.498	51.4023	265.5968	-0.093262	0.26953	-0.16895	6.149	-98.109	1310.1159	-0.43262	1.1006	-1.457	-53.6836	12.386	154.8086	-0.32617	0.0014648	-0.47266	-28.512	47.263	38.99	NaN	NaN	NaN
2.896	-68.735	44.0582	266.9056	-0.090722	0.26201	-0.17149	-9.803	-105.791	1334.0783	-0.26245	0.81225	-1.445	-23.1517	15.1031	221.768	-0.37402	-0.015625	-0.48682	6.579	64.124	30.552	NaN	NaN	NaN
2.898	-78.991	40.2235	255.6798	-0.089551	0.25967	-0.17491	11.028	-67.863	1318.126	-0.18652	0.5957	-1.4219	-37.841	-2.4217	324.1905	-0.49854	-0.052734	-0.53662	-24.362	51.87	-5.567	NaN	NaN	NaN
2.9	-80.32	50.109	253.7715	-0.087989	0.25107	-0.17842	-16.165	-133.472	1346.6149	-0.18213	0.42041	-1.3999	17.1751	46.15	470.197	-0.62574	-0.082764	-0.5896	-21.129	52.8083	-6.864	NaN	NaN	NaN
2.902	-112.3772	58.591	247.5736	-0.092187	0.24766	-0.18164	-48.054	-63.813	1328.5862	-0.19873	0.37744	-1.4019	-9.53339	48.4501	658.789	-0.77979	-0.11475	-0.64111	-43.985	29.9905	-7.435	NaN	NaN	NaN
2.904	-90.118	67.873	253.4997	-0.093262	0.24268	-0.18652	-45.669	-37.473	1346.3766	-0.24609	0.38867	-1.4434	1.842	78.3359	870.746	-1.0664	-0.1499	-0.71484	-29.272	45.0037	26.3299	NaN	NaN	NaN
2.906	-79.499	61.416	260.63263	-0.092969	0.23828	-0.18643	-63.692	-30.175	1382.721	-0.2666	0.43091	-1.4851	4.052	38.9649	1085.214	-1.2456	-0.15771	-0.75537	-58.3	53.721	16.2102	NaN	NaN	NaN
2.908	-88.311	69.181	254.2408	-0.096289	0.23183	-0.18662	-57.466	-1.973	1360.551	-0.29102	0.46875	-1.5117	47.6993	56.2526	1276.586	-1.6421	-0.14648	-0.84521	-44.281	79.359	36.45	NaN	NaN	NaN
2.91	-58.35	57.0133	246.6715	-0.097461	0.23027	-0.18857	-49.743	-141.984	1348.325	-0.33008	0.48047	-1.5176	9.7485	37.56	1459.525	-1.9753	-0.08252	-0.93775	-60.211	60.389	14.6632	NaN	NaN	NaN
2.912	-63.761	55.4025	242.392	-0.10547	0.22832	-0.19062	-47.779	-189.043	1344.461	-0.37451	0.47119	-1.5132	13.2595	55.798	1590.7571	-2.3242	0.104	-0.9375	-77.3488	56.8347	22.6256	NaN	NaN	NaN
2.914	-68.407	42.687	252.627	-0.10498	0.229	-0.19873	-38.5129	-225.83	1382.094	-0.51807	0.45996	-1.5308	21.6223	-3.674	1644.077	-2.939	0.43652	-1.021	-68.314	59.9987	33.7755	NaN	NaN	NaN
2.916	-74.801	46.6921	254.6957	-0.1126	0.22988	-0.20127	-66.9746	-259.587	1439.3515	-0.66211	0.49243	-1.5703	59.648	-3.402	1661.406	-3.2476	0.68799	-1.0874	-87.60096	65.9388	56.8928	NaN	NaN	NaN
2.918	-54.555	36.1867	256.471625	-0.11445	0.22851	-0.19942	-34.3743	-183.036	1408.472	-0.81787	0.56494	-1.6206	36.193	-51.881	1662.245	-3.8418	1.4355	-1.2949	-56.553	69.29667	58.7148	NaN	NaN	NaN
2.92	-58.189	30.2167	277.3106	-0.11992	0.2289	-0.20058	-27.085	-246.2	1426.62	-1.0293	0.70898	-1.7109	-10.33	-87.472	1653.621	-4	2.0576	-1.5655	-79.813	45.0079	55.264365	NaN	NaN	NaN
2.922	-72.886	40.039	286.2653	-0.12353	0.23017	-0.19688	-36.433	-224.185	1451.113	-1.125	0.79395	-1.7637	-79.197	-163.636	1640.688	-3.9897	2.5181	-1.8765	-65.555	46.8396	30.8307	NaN	NaN	NaN
2.924	-78.244	45.263	293.6734	-0.13086	0.22705	-0.19775	-8.982	-192.265	1498.619	-1.2827	0.96533	-1.8726	-83.973	-171.508	1633.68	-2.9683	2.6392	-2.0327	-96.5451	29.869	24.8092	NaN	NaN	NaN
2.926	-82.401	47.128	317.795	-0.13975	0.22197	-0.19619	-34.8397	-205.431	1593.716	-1.3748	1.0608	-1.9519	-38.708	-172.852	1569.954	-2.2104	2.479	-2.0034	-72.92	43.5997	47.837	NaN	NaN	NaN
2.928	-70.384	46.9201	296.3923	-0.14775	0.22441	-0.18945	-16.4337	-93.158	1583.657	-1.4297	1.123	-2.0176	9.748	-186.643	1557.982	-0.82617	1.875	-1.8633	-78.148	32.7662	53.168	NaN	NaN	NaN
2.93	-58.14	56.1887	272.246	-0.15283	0.22481	-0.19219	-1.794158	-94.05	1598.72	-1.4468	1.1567	-2.0776	18.207	-184.2381	1538.6275	-0.16748	1.3056	-1.7207	-41.0124	35.0936	55.689	NaN	NaN	NaN
2.932	-64.057	48.4759	270.115	-0.1582	0.22275	-0.19043	-11.9102	-67.16	1576.8161	-1.438	1.1567	-2.103	-12.838	-148.293	1593.659	0.20996	0.77832	-1.5898	-55.361	0.3161	60.022	NaN	NaN	NaN
2.934	-75.718	39.1119	284.418	-0.16602	0.22021	-0.19727	35.198	-36.632	1549.413	-1.4175	1.1509	-2.1421	-92.846	-68.38	1634.005	0.31055	0.34326	-1.5679	-55.262	-12.9987	97.683	NaN	NaN	NaN
2.936	-39.969	46.25578	292.2072	-0.17041	0.217	-0.20254	45.59898	-78.238	1584.77167	-1.4263	1.1753	-2.1899	-110.447	-17.76	1640.543	0.28516	0.26318	-1.5698	-25.254	-18.9511	120.029	NaN	NaN	NaN
2.938	-51.999	52.8409	286.52143	-0.17754	0.20869	-0.20762	30.5607	-16.706	1574.216	-1.4526	1.2095	-2.2397	-103.943	-35.05	1571.794	0.12402	0.23145	-1.5566	-12.461	-17.1265	184.65	NaN	NaN	NaN
2.94	-61.064	58.971	293.5407	-0.183	0.20517	-0.21816	32.864	-47.8161	1622.618	-1.4844	1.2832	-2.2773	-76.531	-106.074	1565.272	-0.053954	0.28345	-1.5644	18.044	-19.8535	205.1919	NaN	NaN	NaN
2.942	-61.213	48.5574	325.0573	-0.19346	0.19541	-0.21465	50.696	-49.3017	1634.1879	-1.498	1.3203	-2.2891	-73.36	-192.466	1559.265	-0.24023	0.37402	-1.605	-6.1418	-34.2344	261.351	NaN	NaN	NaN
2.944	-70.337	44.985	328.1631	-0.20996	0.18604	-0.2124	78.623	-8.7752	1622.195	-1.4932	1.3574	-2.3125	-103.377	-266.332	1605.979	-0.44531	0.51074	-1.668	55.77	-16.4034	364.392	NaN	NaN	NaN
2.946	-63.45	66.2427	333.8543688	-0.22637	0.16699	-0.21836	69.693	-79.643	1655.7589	-1.4517	1.3296	-2.2974	-109.765	-303.201	1596.7584	-0.51904	0.55713	-1.689	19.1572	-2.77912	512.069	NaN	NaN	NaN
2.948	-83.539	64.665	332.7768	-0.22852	0.19316	-0.20078	64.1648	-44.4438	1628.16827	-1.3926	1.2666	-2.2539	-121.898	-342.321	1593.18	-0.66162	0.56689	-1.7183	32.928	51.01	717.933	NaN	NaN	NaN
2.95	-74.3418	54.1662	337.19246	-0.25117	0.15683	-0.22422	72.177	-61.0884	1657.183	-1.3105	1.1504	-2.1855	-51.257	-352.403	1573.024	-0.79248	0.52539	-1.7476	-20.037	32.8646	869.139	NaN	NaN	NaN
2.952	-84.895	47.6122	350.1868	-0.24287	0.19345	-0.20439	16.66585	-68.333	1664.717	-1.2925	1.0923	-2.1499	-52.162	-330.51	1569.994	-0.93848	0.49902	-1.7793	31.328	54.1623	1010.996	NaN	NaN	NaN
2.954	-83.231	53.8795	341.1076	-0.25391	0.1665	-0.22852	51.0383	2.518	1629.661	-1.2529	0.97998	-2.0918	-3.96100000000001	-299.771	1599.645	-1.1465	0.55762	-1.8477	7.095	52.318	1150.78	NaN	NaN	NaN
2.956	-63.629	58.0376	354.499	-0.24922	0.19151	-0.22344	57.809	-51.5232	1621.426	-1.2263	0.92407	-2.0564	-34.5519	-270.237	1659.127	-1.2515	0.65088	-1.8931	28.1701	68.165	1325.3692	NaN	NaN	NaN
2.958	-61.975	55.0085	377.6681	-0.24365	0.18174	-0.23408	42.581	1.656154	1560.7924	-1.1929	0.87744	-2.0229	-25.4035	-242.926	1725.178	-1.4746	0.87891	-2.0137	49.97815	66.4749	1445.37	NaN	NaN	NaN
2.96	-62.301	63.8043	398.9479	-0.25303	0.19033	-0.23681	36.102	-2.32	1513.5622	-1.1284	0.8501	-2.0015	-24.8084	-158.9008	1722.849	-1.6198	1.0774	-2.111	11.0099	45.1566	1501.028	NaN	NaN	NaN
2.962	-89.197	75.4674	400.41597	-0.24863	0.18125	-0.24101	25.451	-14.351	1474.1707	-1.0894	0.84033	-1.9917	47.042	-81.108	1667.771	-1.7285	1.2559	-2.1758	36.615	3.398	1475.416	NaN	NaN	NaN
2.964	-54.601	67.344	413.8256	-0.27246	0.19238	-0.24121	22.1927	69.8978	1412.244	-1.0093	0.8501	-1.9644	23.1538	-19.447	1617.74	-1.812	1.3657	-2.269	12.753	-73.13	1431.114	NaN	NaN	NaN
2.966	-64.741	68.9616	430.4335	-0.26924	0.19082	-0.24277	-6.43	26.993	1420.27752	-0.9602	0.86157	-1.9446	26.562	-23.957	1588.154	-1.8105	1.373	-2.3008	11.2434	-102.161	1398.953	NaN	NaN	NaN
2.968	-88.823	78.826	427.76664	-0.3041	0.20772	-0.26094	-17.1914	64.5381	1398.0218	-0.92725	0.87549	-1.9194	26.721	-25.232	1626.875	-1.7183	1.3149	-2.3081	-73.6014	-107.661	1387.925	NaN	NaN	NaN
2.97	-89.44	76.961	437.7456	-0.30254	0.21123	-0.24531	-5.104	65.288	1380.30142	-0.89795	0.88428	-1.8784	74.362	-29.877	1657.0875	-1.6353	1.2637	-2.3067	-56.634	-94.056	1356.841	NaN	NaN	NaN
2.972	-94.376	74.575	448.2866	-0.34297	0.22617	-0.28301	-25.491	50.3477	1362.3427	-0.89893	0.88916	-1.8569	81.962	-31.8574	1642.68801	-1.6011	1.2749	-2.3198	-55.989	-138.893	1354.062	NaN	NaN	NaN
2.974	-77.603	64.9642	464.0422	-0.33789	0.25488	-0.25391	-26.695	135.655	1292.183	-0.90039	0.89063	-1.8105	93.773	-56.325	1655.1011	-1.6362	1.3481	-2.3647	-66.858	-122.796	1344.8385	NaN	NaN	NaN
2.976	-92.995	73.791	479.6883	-0.37695	0.23321	-0.30723	-80.8781	98.1271	1294.253	-0.89233	0.88501	-1.7683	84.483	-62.322	1640.197	-1.6655	1.397	-2.3667	-56.08	-174.2971	1336.1673	NaN	NaN	NaN
2.978	-70.039	61.4775	505.0758	-0.38291	0.279	-0.29424	-81.0923	130.096	1289.075	-0.88281	0.87305	-1.7285	96.802	-56.1279	1640.8341	-1.7402	1.4707	-2.3652	-41.171	-159.088	1401.536	NaN	NaN	NaN
2.98	-70.996	58.0531	506.760797	-0.4083	0.25478	-0.31143	-60.1741	128.149	1254.569	-0.86035	0.85156	-1.6621	117.512	-18.084	1627.6767	-1.7678	1.4699	-2.3259	-75.985	-133.219	1453.698	NaN	NaN	NaN
2.982	-50.864	70.311	523.773769	-0.42403	0.29355	-0.31894	-58.2419	72.1392	1255.0358	-0.84277	0.8418	-1.627	100.279	-39.9203	1653.714	-1.7573	1.3931	-2.2612	-94.145	-65.65	1488.708	NaN	NaN	NaN
2.984	-80.016	89.0161	524.9397	-0.44238	0.30322	-0.30713	-33.7421	122.1622	1206.932	-0.81104	0.8125	-1.5605	44.11891	-58.359	1655.7	-1.6855	1.1855	-2.168	-79.666	-88.56	1464.011	NaN	NaN	NaN
2.986	-87.655	79.0457	532.8977	-0.45908	0.30498	-0.31728	-37.6707	86.64	1202.1249	-0.78076	0.79346	-1.5117	24.013	-77.336	1642.376	-1.6172	1.0762	-2.1191	-59.7374	-121.607	1423.323	NaN	NaN	NaN
2.988	-74.113	71.1643	554.2344	-0.48848	0.33535	-0.32227	-23.843	127.839	1167.896	-0.75	0.76855	-1.459	37.6214	-49.034	1577.222	-1.4819	0.90283	-2.0249	-10.999	-218.9838	1401.238	NaN	NaN	NaN
2.99	-88.903	76.48288	574.9045	-0.49785	0.34668	-0.30156	-11.034	172.878	1117.537	-0.69922	0.74121	-1.3916	79.21	-0.0459999999999994	1511.27334	-1.3972	0.83325	-1.9832	-32.4776	-276.646	1460.3445	NaN	NaN	NaN
2.992	-94.742	89.4009	583.2466	-0.52793	0.35039	-0.32793	-29.521	136.375	1113.7172	-0.67969	0.72754	-1.3594	43.248	58.9071	1446.3202	-1.3354	0.78857	-1.9448	-40.243	-315.328	1534.618	NaN	NaN	NaN
2.994	-109.952	88.0098	593.48695	-0.54443	0.38965	-0.30859	-22.529	182.8919	1057.8579	-0.6333	0.69189	-1.2983	-4.234	64.07	1394.7309	-1.2847	0.76221	-1.8843	-44.9294	-339.824	1513.1642	NaN	NaN	NaN
2.996	-94.222	98.251	599.6372	-0.55508	0.38897	-0.30586	-14.591	147.59	1024.9937	-0.59936	0.67016	-1.2449	-43.311	80.931	1365.086	-1.2632	0.75439	-1.8472	24.083	-347.7	1514.875	NaN	NaN	NaN
2.998	-109.054	106.893	595.73342	-0.58154	0.39424	-0.33193	-40.651	185.592	986.099	-0.56738	0.64551	-1.1953	-63.859	66.172	1357.7967	-1.2319	0.72803	-1.7769	33.1345	-349.781	1510.546	NaN	NaN	NaN
3	-101.687	117.6	598.9527	-0.58311	0.43955	-0.30849	-34.969	236.947	941.878	-0.51953	0.62109	-1.1309	-61.9376	91.006	1332.7748	-1.2175	0.70776	-1.7234	65.9552	-295.28	1561.5879	NaN	NaN	NaN
3.002	-100.358	104.6946	611.011	-0.59394	0.41719	-0.31933	-61.049	196.459	937.72826	-0.49609	0.60059	-1.0938	-36.027	101.902	1300.4984	-1.1929	0.68262	-1.6753	41.69	-236.595	1615.9142	NaN	NaN	NaN
3.004	-83.873	98.4257	619.892	-0.60352	0.43457	-0.3291	-61.926	229.971	873.318	-0.45215	0.57617	-1.0254	-32.763	152.705	1213.873	-1.146	0.6543	-1.6108	18.5058	-165.4446	1646.917	NaN	NaN	NaN
3.006	-88.308	90.1447	642.956	-0.6164	0.44023	-0.32754	-51.857	185.0993	839.349	-0.42212	0.54419	-0.97046	-95.823	165.609	1152.949	-1.1152	0.63867	-1.5801	13.4058	-121.864	1643.7479	NaN	NaN	NaN
3.008	-108.519	98.5662	657.2957	-0.60049	0.45674	-0.30049	-32.395	191.7791	818.1698	-0.39014	0.52197	-0.90576	-89.16086	189.27	1105.419	-1.0444	0.61816	-1.5034	21.537	-60.537	1638.8048	NaN	NaN	NaN
3.01	-104.974	82.1829	684.0805	-0.63721	0.42784	-0.34463	-14.573	220.913	787.9393	-0.35547	0.49902	-0.8457	-87.6808	146.932	1112.54	-0.99852	0.61425	-1.4531	75.325	-38.479	1590.653	NaN	NaN	NaN
3.012	-109.499	90.96908	691.5915	-0.62618	0.49609	-0.29883	-69.111	177.29084	779.609	-0.32764	0.47486	-0.79126	-63.821	145.579	1119.139	-0.95898	0.61621	-1.4063	49.567	-14.301	1577.051	NaN	NaN	NaN
3.014	-109.875	97.8521	689.9844	-0.64502	0.4668	-0.30371	-33.535	219.581	701.2759	-0.30078	0.4502	-0.73633	-40.9577	119.354	1094.667	-0.9165	0.61377	-1.3257	50.7412	-14.673	1572.093	NaN	NaN	NaN
3.016	-135.858	104.101	699.3363	-0.65547	0.49531	-0.29697	-25.298	190.8919	662.666	-0.27197	0.43115	-0.67139	-20.166	145.115	1032.9463	-0.8938	0.60522	-1.2707	6.9674	-38.233	1584.679	NaN	NaN	NaN
3.018	-119.515	107.934	701.826	-0.68955	0.51231	-0.31934	-70.519	192.133	657.2145	-0.25977	0.41309	-0.64746	-70.9138	145.111	1004.8469	-0.86035	0.60059	-1.209	49.725	-17.5689	1605.7789	NaN	NaN	NaN
3.02	-104.194	103.5678	723.4432	-0.66729	0.54629	-0.27832	-49.879	202.4425	607.909	-0.24512	0.37256	-0.58594	-80.866	178.808	950.118	-0.81738	0.59375	-1.1426	42.61	-27.9307	1608.082	NaN	NaN	NaN
3.022	-123.055	107.1606	703.483	-0.69736	0.51436	-0.30752	-85.7791	146.398	632.334	-0.22851	0.33569	-0.52856	-60.726	166.329	926.512	-0.80225	0.58252	-1.1069	46.6	-7.3216	1628.808	NaN	NaN	NaN
3.024	-100.929	109.048	721.4245	-0.71777	0.51953	-0.34375	-95.0377	192.5754	580.284	-0.21582	0.31348	-0.48633	-30.438	181.341	870.6246	-0.76074	0.55469	-1.0391	19.50219	-35.6682	1602.166	NaN	NaN	NaN
3.026	-101.479	99.618	733.8988	-0.70459	0.57403	-0.29111	-76.4347	187.107	551.599	-0.20361	0.26953	-0.42676	-44.924	148.60933	837.4263	-0.72779	0.51977	-0.97632	16.4286	-19.4656	1645.344	NaN	NaN	NaN
3.028	-65.774	106.787	738.7357	-0.7206	0.52256	-0.31797	-76.6795	177.853	516.553	-0.1958	0.25439	-0.40283	-37.385	177.9546	799.25	-0.68945	0.48242	-0.91406	-10.5795	-21.8827	1624.719	NaN	NaN	NaN
3.03	-102.167	119.0854	748.5216	-0.70459	0.58389	-0.2832	-57.07	208.236	447.719	-0.18359	0.22949	-0.35791	-30.729	207.652	772.407	-0.63232	0.43018	-0.8208	-5.5262	-14.65321	1643.312	NaN	NaN	NaN
3.032	-106.214	129.364	746.327	-0.7543	0.55293	-0.33223	-75.808	160.1872	436.607	-0.16626	0.21875	-0.32544	-11.712	288.128	700.18435	-0.60889	0.39893	-0.77686	22.6979	-8.3599	1628.234	NaN	NaN	NaN
3.034	-96.844	126.609	760.132	-0.70703	0.66016	-0.23828	-60.887	181.461	403.997	-0.15234	0.20215	-0.29785	-13.545	281.55	660.2722	-0.54639	0.35303	-0.68311	-15.6232	-7.2787	1581.528	NaN	NaN	NaN
3.036	-106.713	133.775	756.5008	-0.78359	0.57774	-0.3209	-50.34	163.295	393.475	-0.12793	0.17529	-0.23633	-1.678	274.87	598.611	-0.50464	0.31518	-0.62183	33.3821	5.27312	1532.7888	NaN	NaN	NaN
3.038	-113.518	141.281	764.5823	-0.79716	0.58096	-0.33349	-42.3549	139.155	405.109	-0.10889	0.1543	-0.20801	-40.007	212.647	605.8313	-0.46729	0.28857	-0.56494	4.9986	29.98979	1456.513	NaN	NaN	NaN
3.04	-120.99	132.4267	745.447	-0.81045	0.64658	-0.29912	-23.946	161.0399	353.9687	-0.081055	0.13916	-0.16992	-27.693	242.4255	594.3097	-0.40674	0.25342	-0.49365	8.435	75.3341	1433.432	NaN	NaN	NaN
3.042	-85.594	130.9498	757.6354	-0.86807	0.58779	-0.36103	-60.285	134.176	340.24	-0.05835	0.11402	-0.13793	-25.991	225.071	566.1091	-0.37842	0.23926	-0.45459	-29.436	82.269	1395.656	NaN	NaN	NaN
3.044	-94.52	135.5847	742.614	-0.81006	0.71533	-0.25732	-43.072	183.74	319.6952	-0.052734	0.10547	-0.11719	-6.714	247.05355	502.27226	-0.33594	0.20313	-0.38086	-30.762	93.2556	1391.163	NaN	NaN	NaN
3.046	-92.278	140.4697	751.2161	-0.89375	0.66875	-0.33213	-25.378	179.763	288.143	-0.030273	0.068848	-0.075684	-65.835	178.949	457.683	-0.3125	0.17968	-0.33691	-31.114	77.84285	1338.5075	NaN	NaN	NaN
3.048	-89.686	130.5081	761.486	-0.9418	0.61836	-0.40517	-59.5027	125.117	306.395	-0.022949	0.058105	-0.0625	-79.575	172.4613	411.505	-0.28467	0.16406	-0.29443	-25.317	125.8028	1295.454	NaN	NaN	NaN
3.05	-86.6	139.9194	776.703	-0.87109	0.75664	-0.29814	-34.685	126.8246	283.9952	-0.019531	0.038086	-0.028809	-83.025	135.524	412.442	-0.25	0.14258	-0.23291	-36.447	130.648	1245.417	NaN	NaN	NaN
3.052	-84.621	149.4426	763.322	-0.93525	0.74697	-0.35518	-18.425	60.494	285.9737	-0.0065919	0.020752	0.0009765	-59.634	153.2648	396.2359	-0.23242	0.13281	-0.20313	-41.816	166.124	1224.524	NaN	NaN	NaN
3.054	-109.368	153.4849	778.5625	-1.0117	0.66211	-0.46191	-26.377	93.617	257.36209	-0.015625	0.030273	0.003418	-78.019	119.017	396.324	-0.19531	0.1084	-0.13867	-25.899	182.38	1191.2941	NaN	NaN	NaN
3.056	-93.238	142.7233	768.82	-0.96641	0.84375	-0.31836	0.458999999999996	104.4765	203.293	-0.00097656	0.017578	0.026855	-76.0457	138.98577	368.58	-0.16455	0.093261	-0.09424	-38.307	193.117	1163.6884	NaN	NaN	NaN
3.058	-103.107	145.53555	764.164	-0.99296	0.84648	-0.31719	-26.806	94.152	196.421	0.018066	0.023926	0.050293	-107.547	108.1347	309.2422	-0.13867	0.080566	-0.060547	-41.235	184.902	1093.976	NaN	NaN	NaN
3.06	-99.707	160.1076	746.7804	-1.027	0.77422	-0.43945	-13.659	137.81	146.6607	0.033691	0.032227	0.062012	-99.155	160.7409	237.223	-0.10986	0.053711	-0.020508	-47.631	155.006	1054.831	NaN	NaN	NaN
3.062	-115.373	151.523	741.5175	-0.99866	0.83613	-0.44199	-29.212	102.0668	155.0474	0.041504	0.031495	0.064941	-75.687	125.91939	236.876	-0.10205	0.041504	-0.0014648	-8.732	177.175	1033.4767	NaN	NaN	NaN
3.064	-120.789	162.917	745.9856	-0.98291	0.89502	-0.43604	-24.578	113.3132	143.55	0.0625	0.037109	0.072754	-50.059	158.3792	241.736	-0.089844	0.011719	0.040039	-55.134	174.171	997.2798	NaN	NaN	NaN
3.066	-98.086	160.8635	748.9785	-0.98243	0.90567	-0.47715	-23.168	106.1548	135.751	0.09668	0.042969	0.1001	-67.008	108.8351	241.939	-0.079834	-0.01294	0.063477	-37.623	211.808	955.053	NaN	NaN	NaN
3.068	-98.861	170.4324	739.5852	-0.96992	0.92812	-0.51933	-39.877	76.407	141.5633	0.11182	0.037109	0.11182	-65.477	146.1752	208.0805	-0.06543	-0.040039	0.098145	-81.0952	188.03	900.5628	NaN	NaN	NaN
3.07	-87.83	173.3981	756.8915	-0.95586	0.93828	-0.53496	-33.519	122.396	105.278	0.12061	0.04248	0.11035	-72.8628	88.3803	173.2308	-0.043945	-0.048828	0.12354	-76.005	206.761	856.7158	NaN	NaN	NaN
3.072	-109.219	173.8182	748.0326	-0.94902	0.93809	-0.54473	-57.275	112.387	80.949	0.13867	0.035889	0.12305	-49.044	123.859	156.503	-0.035156	-0.052734	0.13623	-74.395	233.4145	807.0775	NaN	NaN	NaN
3.074	-65.623	169.5447	736.915	-0.94336	0.94141	-0.56738	-73.57792	115.578	70.04594	0.14258	0.028809	0.12988	-60.227	84.988	131.249	-0.02002	-0.055176	0.1416	-66.314	278.783	792.2128	NaN	NaN	NaN
3.076	-96.987	172.7124	733.037	-0.93603	0.94834	-0.58487	-51.665	118.957	58.505	0.15381	0.02832	0.13672	-52.507	133.14	104.7099	0.00097655	-0.053223	0.14282	-79.399	316.594	724.027	NaN	NaN	NaN
3.078	-102.618	179.0634	726.5789	-0.92569	0.95283	-0.59951	-76.29494	67.6449	71.5217	0.15137	0.026855	0.13965	-19.328	81.023	79.944	0.028809	-0.04834	0.14307	-103.3064	301.008	694.381	NaN	NaN	NaN
3.08	-89.36	179.98	725.86313	-0.91279	0.95869	-0.61396	-37.726	86.964	46.839	0.1582	0.02002	0.14746	-20.208	97.0377	97.892	0.068848	-0.044434	0.1499	-96.275	287.319	650.916	NaN	NaN	NaN
3.082	-85.858	170.23	712.5446	-0.89658	0.96885	-0.61943	-38.59	46.6377	41.442	0.1687	0.01709	0.15943	-45.4848	23.429	111.0699	0.085938	-0.034668	0.14941	-116.166	259.998	607.3451	NaN	NaN	NaN
3.084	-117.148	180.039	710.459	-0.88281	0.9707	-0.61719	-83.625614	36.953	49.726	0.16602	0.016113	0.16016	-27.579	63.177	106.193	0.12012	-0.023926	0.15234	-58.383	277.097	607.035	NaN	NaN	NaN
3.086	-125.967	185.4716	705.0692	-0.87246	0.96973	-0.62168	-44.941	57.7929	19.338	0.16992	0.019043	0.16162	13.299	40.183	65.29	0.13306	-0.014649	0.15381	-90.84252	260.45	581.463	NaN	NaN	NaN
3.088	-78.151	185.01425	706.0854	-0.86425	0.96719	-0.61455	-54.652	39.2568	39.5076	0.17725	0.018066	0.17334	11.683	110.66894	53.854	0.13916	0.003418	0.14941	-83.3169	263.582	524.119	NaN	NaN	NaN
3.09	-99.787	188.2992	688.8525	-0.85645	0.95312	-0.60518	-39.741	76.841	40.393	0.17969	0.023926	0.1792	-1.774	60.5228	30.9676	0.16016	0.013672	0.15625	-114.608	220.719	455.7989	NaN	NaN	NaN
3.092	-92.701	187.74	692.287	-0.84854	0.94697	-0.59121	-42.405	63.258	45.992	0.18384	0.026856	0.17725	-20.612	89.375	38.7439	0.16602	0.015625	0.15918	-68.724	219.2939	409.854	NaN	NaN	NaN
3.094	-81.568	173.985	680.306	-0.83545	0.92236	-0.58838	-48.857	39.1445	74.162	0.19775	0.035645	0.16602	-15.755	44.7581	25.692	0.17432	0.025391	0.15918	-45.061	197.6742	383.778	NaN	NaN	NaN
3.096	-71.864	161.754	677.599	-0.80605	0.91426	-0.57832	-53.73	66.252	36.49102	0.22998	0.042969	0.18262	-25.862	91.005	23.368	0.1709	0.031983	0.1521	-44.651	178.871	399.754	NaN	NaN	NaN
3.098	-81.989	165.338	685.744	-0.78115	0.90049	-0.57842	-64.233	33.76269	46.10442	0.25244	0.037598	0.18994	-34.147	35.8796	22.36	0.1709	0.039063	0.15137	-62.653	158.30681	356.3646	NaN	NaN	NaN
3.1	-107.7385	168.163	707.067	-0.76904	0.87744	-0.58662	-30.564	44.8202	38.6455	0.28223	0.032715	0.18604	-66.444	73.178	29.094	0.1709	0.050293	0.15625	-76.5023	121.6617	337.408	NaN	NaN	NaN
3.102	-86.96	152.167	738.9	-0.75743	0.84746	-0.6	-14.834	32.1577	14.462	0.30249	0.018799	0.18262	-71.056	41.1076	4.747	0.17529	0.061035	0.16016	-38.99	127.9766	281.2391	NaN	NaN	NaN
3.104	-82.517	169.522	751.81	-0.75732	0.81689	-0.60693	-14.085	19.444	27.881	0.31494	0.0092773	0.17676	-66.581	105.118	15.437	0.2002	0.068848	0.16455	-66.4195	102.214	281.424	NaN	NaN	NaN
3.106	-82.884	191.9335	770.2	-0.76729	0.78389	-0.60889	-5.339	49.772	2.171	0.30518	-0.00097656	0.15723	-52.849	47.4887	20.5383	0.21924	0.072754	0.16577	-24.933	131.4012	254.133	NaN	NaN	NaN
3.108	-114.206	202.01	787.76	-0.79179	0.75742	-0.60664	-27.644	35.6669	21.2199	0.31885	-0.017578	0.15869	-74.8109	61.078	51.919	0.25146	0.081055	0.16699	-57.985	123.532667	215.3348	NaN	NaN	NaN
3.11	-107.891	212.32	830.58	-0.81992	0.73867	-0.60742	-12.369	43.2254	31.463	0.30957	-0.033203	0.15576	-61.231	15.026	41.1162	0.29932	0.081543	0.16748	-19.262	145.9977	163.476	NaN	NaN	NaN
3.112	-108.2477	226.684	872.08	-0.85772	0.72276	-0.61924	-10.515	43.593	37.8086	0.29443	-0.039795	0.13965	-72.5639	47.407	35.722	0.33154	0.084473	0.16504	-38.68	106.184	113.404	NaN	NaN	NaN
3.114	-130.942	243.868	911.9	-0.8999	0.71729	-0.62842	-33.165	18.213	61.339	0.27246	-0.04248	0.11914	-59.867	34.631	20.92	0.37207	0.072266	0.15918	-20.519	115.2586	125.048	NaN	NaN	NaN
3.116	-112.672	230.237	984.93	-0.94365	0.71865	-0.65889	-5.877	30.44065	31.1204	0.24854	-0.033691	0.10547	-67.339	55.2152	62.3552	0.39111	0.057618	0.15552	-27.287	97.28813	118.3468	NaN	NaN	NaN
3.118	-129.751	219.071	1056.3	-0.99248	0.72041	-0.67607	-14.428	13.6498	50.079	0.24023	-0.033203	0.098633	-80.879	21.5107	54.214	0.41455	0.036133	0.1626	-21.087	95.3003	93.9222	NaN	NaN	NaN
3.12	-131.993	211.186	1097.49	-1.0417	0.71729	-0.7042	-55.6813	22.656	52.1349	0.22217	-0.011719	0.088379	-90.99	34.789	54.9519	0.41309	0.0058594	0.16016	-33.122	114.15	57.65	NaN	NaN	NaN
3.122	-148.937	197.7844	1134.46	-1.099	0.71328	-0.72871	-48.608	39.108	10.061	0.20654	0.01123	0.075195	-68.1856	22.102	37.583	0.40625	-0.010742	0.15283	-71.82948	92.8299	49.893	NaN	NaN	NaN
3.124	-141.59	179.951	1178.72	-1.166	0.71289	-0.75586	-42.175	25.6611	20.3985	0.19873	0.033203	0.068359	-77.005	31.6575	63.457	0.38574	-0.041504	0.15186	-41.194	104.369	35.736	NaN	NaN	NaN
3.126	-135.797	146.33	1196.11	-1.2394	0.71338	-0.78623	-45.737	44.274	-2.6241	0.19238	0.063477	0.05957	-40.419	14.8032	72.371	0.36108	-0.058106	0.14892	-51.965	87.9709	42.489	NaN	NaN	NaN
3.128	-125.316	94.356	1206.66	-1.3128	0.73115	-0.80069	-44.716	15.500817	11.122	0.18945	0.075684	0.056641	-57.811	26.685	64.457	0.32813	-0.068359	0.13672	-26.695	112.456	43.88	NaN	NaN	NaN
3.13	-138.807	44.61	1214.99	-1.3769	0.75928	-0.81552	-53.879	16.528	40.7337	0.19336	0.097656	0.054199	-31.377	29.398	18.25818	0.28662	-0.0625	0.13525	-74.85462	82.871	48.6057	NaN	NaN	NaN
3.132	-146.58	6.81	1203.04	-1.4382	0.80361	-0.8167	-45.6	41.0685	17.2938	0.19189	0.11182	0.049072	-34.867	20.771	12.54	0.26611	-0.050781	0.12793	-61.7925	76.725	48.1904	NaN	NaN	NaN
3.134	-109.038	-21.24	1204.67	-1.4785	0.85352	-0.82422	-71.7577	25.147	42.0452	0.19727	0.12012	0.047852	5.345	23.824	15.9496	0.24658	-0.022461	0.11377	-82.221	42.861	41.1616	NaN	NaN	NaN
3.136	-117.925	-24.91	1195.08	-1.4942	0.92001	-0.8206	-53.184	42.2931	20.9044	0.20068	0.13232	0.047363	-12.545	8.1718	45.0124	0.23877	0.006592	0.098635	-48.433	59.8331	38.0673	NaN	NaN	NaN
3.138	-108.158	-37.8	1176.86	-1.4833	0.98328	-0.82021	-62.193	25.4268	19.051	0.20459	0.13428	0.052246	8.066	28.9991	21.0342	0.23535	0.038574	0.093262	-65.8439	65.259	38.7502	NaN	NaN	NaN
3.14	-104.851	-26.95	1151.25	-1.4384	1.0438	-0.81592	-67.919	27.0706	27.6589	0.21191	0.14551	0.057129	-12.105	37.887	10.8882	0.24268	0.070801	0.07373	-55.521	41.35	60.755	NaN	NaN	NaN
3.142	-68.7952	-18.72	1126.69	-1.3572	1.0916	-0.8002	-38.669	57.125	10.2866	0.22144	0.14697	0.056641	-19.363	55.717	6.8659	0.24707	0.083984	0.074219	-80.6759	48.0552	28.4961	NaN	NaN	NaN
3.144	-94.9393	5.56	1092.61	-1.2476	1.1138	-0.78857	-61.6743	34.3806	31.9045097	0.23193	0.14551	0.060059	-45.327	15.3048	21.4746	0.24512	0.11328	0.06543	-92.1642	23.6946	26.1508	NaN	NaN	NaN
3.146	-80.4645	23.5	1068.69	-1.1203	1.103	-0.77352	-44.7616	37.2752	24.3603	0.24707	0.14111	0.058105	-33.049	26.2661	16.70253	0.23926	0.12427	0.069092	-49.775	54.5716	11.475	NaN	NaN	NaN
3.148	-64.302	13.68	1045.75	-0.97907	1.0598	-0.75262	-47.965	21.083	21.282	0.24756	0.14111	0.051758	-36.951	7.5419	8.878	0.22412	0.1333	0.066895	-45.62	49.1867	52.2771	NaN	NaN	NaN
3.15	-62.71	27.07	993.93	-0.83804	0.98752	-0.73817	-52.958	19.807	23.3236	0.24951	0.14502	0.044922	-13.739	46.4005	21.853	0.20117	0.13135	0.069824	-37.964	70.027	67.176	NaN	NaN	NaN
3.152	-46.442	34.9	961.42	-0.6991	0.90286	-0.73183	-14.175	26.84116	2.422	0.25098	0.14917	0.041016	-35.056	21.652	41.1	0.18701	0.12695	0.070801	-73.5666	31.309	62.388	NaN	NaN	NaN
3.154	-26.818	26.93	934.48	-0.56885	0.81885	-0.73975	-26.753	25.2606	32.3807	0.24609	0.15625	0.032715	-32.855	47.552	8.4593	0.17188	0.12012	0.067871	-11.244	45.7383	44.558	NaN	NaN	NaN
3.156	-15.198	8.05	916.77	-0.45145	0.7385	-0.74325	-20.761	44.9293	20.2042	0.23975	0.16846	0.017578	-53.408	22.02	-17.17128	0.15527	0.11621	0.064453	-51.8164	16.9122	34.56943	NaN	NaN	NaN
3.158	9.7	-13.72	887.35	-0.34603	0.6705	-0.75779	-13.478	54.579	8.616	0.24121	0.17871	0.010254	-38.485	78.9153	-21.1771	0.14648	0.11719	0.067871	-12.122	24.4573	55.548	NaN	NaN	NaN
3.16	16.818	-32.09	864.68	-0.25036	0.61621	-0.76792	-26.425	50.5413	41.9959	0.23877	0.20215	-0.0043945	-52.41	43.3375	15.413	0.14209	0.11279	0.063477	-46.842	18.1497	36.7174	NaN	NaN	NaN
3.162	42.318	-56.377	860.55	-0.1682	0.56614	-0.78979	2.619	60.491	24.1354	0.23828	0.21949	-0.018799	-66.6813	91.944	43.2839	0.14038	0.11597	0.053467	-14.961	13.37	32.2032	NaN	NaN	NaN
3.164	43.435	-82.529	853.147	-0.10156	0.53418	-0.80273	-24.089	35.7438	32.3667	0.23926	0.23535	-0.028809	-78.7431	39.3114	40.304	0.13232	0.12451	0.054199	-40.368	18.82962	-14.755	NaN	NaN	NaN
3.166	46.053	-98.791	858.65	-0.048783	0.50895	-0.82011	-25.529	35.4204	37.219	0.23438	0.25391	-0.043457	-83.9324	79.885	13.936	0.12891	0.13965	0.037598	-23.406	1.932	8.014	NaN	NaN	NaN
3.168	32.082	-112.778	844.285	-0.0053617	0.49773	-0.83873	-29.946	51.459	0.032	0.23364	0.26026	-0.057373	-91.954	51.039	38.996	0.13086	0.14795	0.038086	-30.527	19.1409	25.7701	NaN	NaN	NaN
3.17	45.336	-126.05	844.364	0.012873	0.49658	-0.85487	-36.907	41.9721	36.20424	0.23486	0.29004	-0.069336	-84.397	80.661	53.6108	0.13037	0.16504	0.025879	-49.424	1.844	43.425	NaN	NaN	NaN
3.172	49.441	-119.276	819.826	0.016998	0.50523	-0.88155	-11.848	51.184	27.80374	0.22998	0.32568	-0.098145	-81.349	40.449	59.3331	0.13232	0.18311	0.019043	7.002	31.0478	46.992	NaN	NaN	NaN
3.174	42.078	-105.43	818.404	0.0058594	0.51514	-0.9126	-36.524	31.1479	20.4831	0.22314	0.34961	-0.11328	-64.503	75.542	46.6636	0.12939	0.20117	0.0063477	-55.2034	11.8674	27.1602	NaN	NaN	NaN
3.176	40.051	-91.023	819.71	-0.0085114	0.54347	-0.93605	-43.205	33.6267	22.8795	0.2251	0.38818	-0.13135	-53.1885	27.884	53.498	0.12207	0.21924	-0.01123	-14.224	46.8233	14.0329	NaN	NaN	NaN
3.178	62.539	-77.081	818.085	-0.043735	0.57391	-0.9716	-36.741	45.644	13.586	0.21655	0.40894	-0.14575	-62.3397	47.837	74.323	0.11865	0.22852	-0.030762	-57.838	34.0853	3.353	NaN	NaN	NaN
3.18	57.315	-70.316	805.079	-0.10224	0.60264	-1.0195	-61.7023	33.039	53.423	0.2085	0.42822	-0.16553	-23.141	-11.744	65.796	0.10498	0.24072	-0.054199	-40.841	64.1819	9.679	NaN	NaN	NaN
3.182	52.918	-51.576	807.579	-0.16967	0.63057	-1.0647	-40.152	39.5153	48.224	0.19287	0.43604	-0.20557	-45.401	24.9101	32.6096	0.09082	0.25806	-0.073975	-58.915	61.1657	-13.786	NaN	NaN	NaN
3.184	56.406	-58.992	831.059	-0.2417	0.68994	-1.0815	-50.425	38.4307	56.038	0.1875	0.45117	-0.22559	-33.486	1.16	12.58	0.077637	0.27051	-0.090332	-39.348	49.6978	13.5708	NaN	NaN	NaN
3.186	48.304	-49.625	831.3	-0.32417	0.74812	-1.1164	-50.9466	13.791	53.58487	0.1543	0.45361	-0.2583	-30.166	42.575	40.157	0.054688	0.3042	-0.11377	-79.26939	58.717	-3.283	NaN	NaN	NaN
3.188	62.35	-45.743	828.734	-0.4361	0.78143	-1.1704	-45.006	7.8812	52.458	0.11987	0.47241	-0.29663	-11.551	21.471645	64.7634	0.045898	0.31445	-0.12451	-82.1022	56.9691	5.3132	NaN	NaN	NaN
3.19	51.315	-34.472	837.656	-0.51612	0.85475	-1.1736	-75.89181	-6.3223	103.59319	0.083008	0.46924	-0.31787	-19.076	47.069	73.164	0.030762	0.34912	-0.146	-49.363	93.419	18.7565	NaN	NaN	NaN
3.192	41.158	-37.559	865.736	-0.58945	0.93948	-1.1851	-46.777	14.7566	85.4105	0.025391	0.47803	-0.37256	-33.674	8.1316	38.923	0.019531	0.37183	-0.15625	-78.910871	65.634	47.469	NaN	NaN	NaN
3.194	22.093	-49.587	873.158	-0.68066	0.94971	-1.2202	-72.612	32.927	120.1377	-0.0083008	0.49854	-0.41943	-39.548	28.2227	34.92	0.011719	0.40283	-0.17676	-58.759	67.636	41.6946	NaN	NaN	NaN
3.196	54.276	-63.942	887.371	-0.73252	1.0377	-1.2074	-85.309	19.3322	185.9547	-0.092773	0.52246	-0.51953	-10.133	5.9939	42.429	0.0014648	0.44531	-0.19727	-76.0962	36.9492	51.5353	NaN	NaN	NaN
3.198	47.635	-70.346	900.592	-0.78388	1.0613	-1.2055	-65.794	23.8327	236.793	-0.17871	0.53198	-0.59692	-14.188	47.723	32.5327	-0.0029297	0.45996	-0.20898	-44.691	67.5068	21.897	NaN	NaN	NaN
3.2	40.907	-84.651	901.619	-0.83348	1.0768	-1.2055	-92.1812	18.506	361.695	-0.28418	0.53857	-0.66357	-14.931	37.2935	5.442	-0.010742	0.50488	-0.22949	-56.365	58.433	33.754	NaN	NaN	NaN
3.202	29.484	-85.199	895.285	-0.84369	1.0991	-1.159	-69.095	36.836	504.8629	-0.46973	0.56787	-0.76807	-36.268	38.7866	-12.595	-0.014649	0.53663	-0.2395	-33.494	67.892	66.281	NaN	NaN	NaN
3.204	51.564	-75.184	875.169	-0.88232	1.0581	-1.1519	-52.875	50.1987	633.314	-0.58008	0.57422	-0.8125	1.451	3.229	-12.5221	-0.02002	0.56396	-0.24756	-83.97199	42.866	57.542	NaN	NaN	NaN
3.206	50.686	-74.942	865.856	-0.88149	1.061	-1.1079	-52.083	38.689	785.735	-0.85547	0.65234	-0.90234	-41.23	11.054	2.037	-0.020996	0.60107	-0.25146	-37.401	15.1459	45.729	NaN	NaN	NaN
3.208	44.523	-70.231	870.841	-0.88679	0.98314	-1.0792	-39.738	52.8832	872.841	-1.0916	0.74341	-0.98414	-41.117	16.253	-6.65702	-0.019043	0.62305	-0.25195	-51.9951	22.0818	31.5455	NaN	NaN	NaN
3.21	36.341	-53.992	853.387	-0.88787	0.95454	-1.0572	-76.437	51.947	979.333	-1.3223	0.86914	-1.063	-50.223	39.6125	14.7874	-0.01709	0.64893	-0.2583	-33.779	16.473	52.635	NaN	NaN	NaN
3.212	28.983	-24.757	829.477	-0.86337	0.87977	-1.0168	-71.259	56.287	1105.7294	-1.6104	1.1211	-1.1582	-42.144	48.5706	26.0959	-0.011474	0.66284	-0.27515	-33.861	29.8646	61.095	NaN	NaN	NaN
3.214	29.48	-7.401	831.975	-0.87061	0.83447	-1.019	-86.594	64.7329	1185.2501	-1.7104	1.2837	-1.1968	-78.9389	26.445	77.944	-0.0029297	0.67285	-0.30469	-37.214	12.108	62.4488	NaN	NaN	NaN
3.216	15.937	2.53	826.014	-0.82373	0.78895	-0.98148	-103.038	28.5812	1245.541	-1.7891	1.6094	-1.2891	-86.4078	30.7385	92.2859	0.0053711	0.66797	-0.34619	-22.144	42.6516	21.572	NaN	NaN	NaN
3.218	30.162	17.927	825.765	-0.81879	0.75585	-0.9918	-93.931	-14.195	1218.948	-1.7104	1.7608	-1.3433	-89.9061	30.2328	132.947	0	0.65625	-0.37988	-39.794	10.0686	18.45	NaN	NaN	NaN
3.22	30.004	8.81	801.633	-0.76678	0.73583	-0.9686	-118.92297	-70.289	1235.714	-1.5234	1.8555	-1.3672	-83.4645	72.0645	201.469	-0.050293	0.60986	-0.45508	5.853	36.27023	38.8256	NaN	NaN	NaN
3.222	27.019	-9.784	802.996	-0.74797	0.72978	-0.96483	-100.6475	-85.633	1233.505	-1.1387	1.8516	-1.332	-86.576	65.2948	377.787	-0.13842	0.55908	-0.52929	-46.715	3.291	42.709	NaN	NaN	NaN
3.224	29.217	-9.57700000000001	792.11	-0.70264	0.729	-0.9624	-63.853	-62.528	1231.74654	-0.94238	1.8047	-1.2969	-121.528	80.5943	536.925	-0.26074	0.50391	-0.60742	-20.71	23.95304	34.934	NaN	NaN	NaN
3.226	24.967	-19.837	779.764	-0.66752	0.7465	-0.94952	-87.5155	-78.06	1269.20595	-0.66406	1.6484	-1.2012	-128.165	57.8238	741.599	-0.49658	0.41846	-0.70459	-46.918	12.632	9.5171	NaN	NaN	NaN
3.228	21.721	-14.756	778.032	-0.63814	0.74029	-0.96623	-55.231	-83.943	1237.842	-0.59717	1.4975	-1.1523	-100.11	85.3123	961.267	-0.65332	0.39209	-0.74463	-27.626	4.58	8.5908	NaN	NaN	NaN
3.23	11.551	-29.959	770.274	-0.59047	0.76514	-0.93188	-47.689	-149.498	1249.182	-0.6084	1.3516	-1.1211	-115.85	49.8083	1212.575	-1.0176	0.37109	-0.82031	-49.911	22.4851	-9.0574	NaN	NaN	NaN
3.232	12.654	-26.799	747.854	-0.57609	0.74524	-0.95498	-53.573	-199.264	1279.9703	-0.73975	1.2114	-1.1108	-117.125	82.749	1433.42	-1.3179	0.39063	-0.88086	-38.313	27.544	2.1511	NaN	NaN	NaN
3.234	-1.146	-33.877	730.971	-0.54053	0.77783	-0.9043	-61.586	-195.927	1313.4396	-0.82373	1.1802	-1.1089	-154.106	66.868	1569.749	-1.6265	0.46338	-0.93896	-42.728	64.1358	-8.471	NaN	NaN	NaN
3.236	-14.629	-20.168	735.065	-0.54707	0.7494	-0.92324	-119.5346	-198.542	1375.94	-0.99414	1.1875	-1.1289	-141.138	105.243	1587.9596	-2.0039	0.6875	-0.95703	-54.5143	47.2941	17.741	NaN	NaN	NaN
3.238	-2.396	-12.066	739.92	-0.52549	0.78212	-0.87609	-95.688	-163.85	1350.1629	-1.0965	1.2366	-1.1648	-119.849	32.151	1586.755	-2.2007	0.84912	-1.0112	-57.4917	66.752	28.592	NaN	NaN	NaN
3.24	-11.526	4.49	713.5	-0.53915	0.75321	-0.89639	-115.2636	-171.642	1338.664	-1.1655	1.2954	-1.2183	-125.35	21.2847	1538.315	-2.4585	1.2563	-1.1245	-72.3884	32.1676	51.548	NaN	NaN	NaN
3.242	-6.065	13.444	687.239	-0.52413	0.77588	-0.84873	-91.84784	-212.324	1360.2982	-1.228	1.3696	-1.2954	-96.7532	-55.538	1481.698	-2.521	1.5689	-1.2339	-43.424	59.661	40.9681	NaN	NaN	NaN
3.244	-15.337	26.771	669.741	-0.5332	0.74805	-0.85938	-47.4773	-231.538	1381.428	-1.2539	1.3965	-1.3389	-67.46	-41.304	1484.945	-2.4312	1.8306	-1.3413	-70.637	29.634	67.3757	NaN	NaN	NaN
3.246	-4.869	31.627	669.416	-0.51201	0.76299	-0.80928	-81.58403	-275.12	1462.6008	-1.3027	1.4238	-1.418	-61.2237	-121.519	1469.959	-1.9722	2.0073	-1.3901	-77.745	48.209	91.53	NaN	NaN	NaN
3.248	-11.586	40.219	657.653	-0.50079	0.74659	-0.79796	-53.531	-266.081	1479.8325	-1.3423	1.435	-1.476	-84.6092	-114.935	1450.791	-1.646	2.0122	-1.3687	-85.1068	52.444	108.224	NaN	NaN	NaN
3.25	-8.08800000000001	43.82	618.718	-0.4836	0.7376	-0.75771	-13.708	-303.116	1492.9411	-1.3794	1.4438	-1.5288	7.384	-203.151	1400.9206	-1.0405	1.8853	-1.2886	-56.608	60.47	152.447	NaN	NaN	NaN
3.252	-5.044	44.694	614.929	-0.4667	0.72842	-0.73955	14.413	-306.453	1546.189	-1.4214	1.4585	-1.5767	34.511	-203.603	1339.9552	-0.77027	1.6858	-1.2068	-91.307	60.6934	224.035	NaN	NaN	NaN
3.254	-16.566	25.539	604.093	-0.4541	0.70605	-0.71484	59.68	-258.247	1555.55	-1.4355	1.4766	-1.5938	23.719	-207.154	1345.981	-0.66406	1.4453	-1.1172	-83.85	59.2522	439.258	NaN	NaN	NaN
3.256	-12.075	24.479	586.179	-0.42793	0.69922	-0.68457	17.819	-242.877	1624.3613	-1.4722	1.5103	-1.6187	-53.396	-143.338	1428.027	-0.77979	1.1665	-1.0366	-132.274	97.655	642.478	NaN	NaN	NaN
3.258	-6.742	20.627	558.838	-0.41328	0.66787	-0.65821	-3.672	-198.85477	1670.1482	-1.5086	1.5423	-1.6375	-77.007	-149.91	1497.53956	-0.91797	1.0635	-1.0146	-146.202	73.348	853.311	NaN	NaN	NaN
3.26	-16.289	13.498	543.738	-0.38164	0.66553	-0.62852	-51.154	-171.818	1701.39608	-1.5508	1.584	-1.6602	-97.388	-127.29	1529.50062	-1.2773	0.94922	-0.97266	-30.84	67.373	1028.855	NaN	NaN	NaN
3.262	-8.914	7.722	541.417	-0.36612	0.64189	-0.60889	-83.3209	-161.072	1761.148	-1.5996	1.6523	-1.6895	-26.156	-197.25	1478.968	-1.5469	0.92481	-0.97657	-86.598	16.536	1254.06536	NaN	NaN	NaN
3.264	-2.583	18.2853	536.798	-0.33496	0.63867	-0.57422	-39.536	-102.992	1734.5945	-1.6167	1.6899	-1.7104	-22.07	-240.917	1474.281	-1.7676	0.94727	-1.0254	-94.018	41.9796	1436.1572	NaN	NaN	NaN
3.266	7.22799999999999	28.2945	532.868	-0.31406	0.62129	-0.55156	-69.416	-130.993	1750.4697	-1.6523	1.7676	-1.7402	-66.4231	-293.567	1498.861	-1.916	1.0605	-1.1201	-109.6317	-71.807	1533.633	NaN	NaN	NaN
3.268	8.00700000000001	39.03694	534.456	-0.29014	0.60342	-0.52998	-80.01	-117.175	1740.06484	-1.6587	1.8139	-1.7593	-111.6923	-315.072	1545.4105	-1.9238	1.1309	-1.1836	-121.241	-107.992	1547.286	NaN	NaN	NaN
3.27	1.91	30.4396	526.742	-0.26475	0.59365	-0.50146	-59.126	-117.327	1742.30649	-1.6597	1.854	-1.771	-54.759	-334.695	1534.4961	-1.8862	1.2505	-1.2769	-137.268	-158.274	1522.843	NaN	NaN	NaN
3.272	7.021	40.5135	495.338	-0.24785	0.55557	-0.49101	-81.8629	-128.3974	1760.5382	-1.6577	1.8696	-1.769	-4.581	-348.423	1569.3003	-1.8281	1.3042	-1.3316	-3.934	-193.0024	1542.79	NaN	NaN	NaN
3.274	14.371	39.4342	480.452	-0.21924	0.57031	-0.44727	-31.959	-82.9	1742.7572	-1.6543	1.8652	-1.7598	67.253	-354.28	1573.264	-1.7866	1.3228	-1.3667	-49.0426	-180.84	1537.818	NaN	NaN	NaN
3.276	1.395	39.0709	471.846	-0.21358	0.52109	-0.45	-42.475	-129.979	1777.938	-1.6348	1.8359	-1.7305	50.387	-354.584	1640.577	-1.7539	1.2949	-1.3818	-96.433	-184.639	1532.043	NaN	NaN	NaN
3.278	9.214	44.0745	447.416	-0.18018	0.54317	-0.40468	-63.172	-127.933	1804.6992	-1.6169	1.7893	-1.6941	-13.768	-303.158	1681.497	-1.7554	1.2739	-1.3706	-65.44	-252.22	1465.031	NaN	NaN	NaN
3.28	-9.078	38.1545	430.225	-0.17666	0.47871	-0.41758	-69.014	-99.585	1791.7668	-1.5952	1.7329	-1.6636	-94.283	-224.588	1782.9516	-1.8203	1.2422	-1.3555	6.753	-395.01	1401.682	NaN	NaN	NaN
3.282	6.405	44.835	415.988	-0.14043	0.51797	-0.37383	-105.34825	-102.128	1805.247	-1.5562	1.6548	-1.6147	-110.485071	-121.326	1849.255	-1.8933	1.2488	-1.3445	53.626	-398.45	1349.048	NaN	NaN	NaN
3.284	2.63199999999999	42.565	434.643	-0.14063	0.44385	-0.39014	-104.53	-53.1548	1784.507	-1.5313	1.625	-1.5957	-106.7171	-100.347	1868.912	-1.9863	1.2793	-1.3457	104.822	-351.754	1430.535	NaN	NaN	NaN
3.286	-1.40600000000001	46.188	435.159	-0.11319	0.49024	-0.34502	-135.256	-68.756	1784.364	-1.4937	1.5864	-1.564	-98.9191	-36.976	1815.004	-2.1343	1.354	-1.3726	33.25473	-202.894	1446.248	NaN	NaN	NaN
3.288	1.20999999999999	47.9331	419.839	-0.10684	0.44277	-0.35098	-136.115	-54.677	1785.483	-1.4605	1.5815	-1.5523	-113.844	-18.48	1783.479	-2.207	1.3965	-1.3945	-53.987	-163.86	1442.3	NaN	NaN	NaN
3.29	-1.54700000000001	51.674	423.715	-0.086523	0.46738	-0.32676	-96.5233	-37.021	1725.8324	-1.4292	1.5864	-1.5405	-112.044	26.971	1756.509	-2.3379	1.498	-1.4336	-22.181	-134.61	1390.434	NaN	NaN	NaN
3.292	-6.523	42.778	398.77	-0.078027	0.42676	-0.32422	-111.352	-55.2086	1713.449	-1.3838	1.5947	-1.5273	-112.6484	9.948	1787.47	-2.4031	1.5911	-1.449	16.6086	-218.28	1428.777	NaN	NaN	NaN
3.294	-13.687	40.7285	388.18	-0.072266	0.43652	-0.30957	-74.864	-9.7669	1643.954	-1.3545	1.5938	-1.5254	-81.118	20.7223	1818.256	-2.4414	1.6621	-1.4922	35.43	-215.328	1538.949	NaN	NaN	NaN
3.296	3.395	48.6923	368.079	-0.065332	0.41201	-0.30059	-82.865	-19.4644	1606.543	-1.2983	1.5825	-1.5034	-66.28	-41.5143	1825.958	-2.4214	1.7212	-1.5483	-28.3586	-250.245	1572.164	NaN	NaN	NaN
3.298	-27.096	42.8272	386.604	-0.058203	0.41348	-0.27686	-78.764	-2.347	1591.95	-1.2576	1.5569	-1.4802	-30.878	-49.7879	1836.387	-2.3447	1.751	-1.5542	-17.947	-265.697	1585.342	NaN	NaN	NaN
3.3	-13.311	38.456356	380.786	-0.064843	0.37715	-0.29209	-44.582	37.05	1565.487	-1.2207	1.5254	-1.4531	-72.73	-90.58	1862.229	-2.2358	1.7603	-1.5444	-58.904	-343.265	1593.9119	NaN	NaN	NaN
3.302	-6.705	35.2274	375.182	-0.050683	0.38564	-0.26162	-53.042	7.5895	1580.9506	-1.1724	1.4692	-1.4116	-121.695	-29.6478	1864.505	-2.0366	1.7075	-1.519	54.3576	-339.514	1617.084	NaN	NaN	NaN
3.304	-20.068	51.265	365.104	-0.062012	0.3208	-0.2915	-47.565	38.0852	1509.8757	-1.1484	1.4395	-1.3984	-164.19	-26.163	1872.026	-1.9316	1.6602	-1.5	106.463	-344.075	1601.102	NaN	NaN	NaN
3.306	-14.955	52.053	380.124	-0.034472	0.39111	-0.22588	-39.859	48.195	1486.4635	-1.105	1.3813	-1.3589	-147.686	20.3451	1830.207	-1.7324	1.5547	-1.4453	141.271	-351.867	1661.971	NaN	NaN	NaN
3.308	-17.223	46.799	371.801	-0.060645	0.32558	-0.2625	-66.076	74.038	1468.5076	-1.0722	1.334	-1.333	-161.308	-36.017	1797.645	-1.6062	1.472	-1.3943	55.839	-342.624	1796.098	NaN	NaN	NaN
3.31	-11.47	57.704	349.952	-0.033301	0.37558	-0.2168	-33.131	100.773	1441.431	-1.0391	1.293	-1.3086	-125.095	-24.9455	1778.9889	-1.5137	1.4043	-1.3477	11.227	-327.773	1899.327	NaN	NaN	NaN
3.312	-9.346	59.413	334.432	-0.059668	0.30918	-0.24854	-44.031	70.613	1452.151	-0.99951	1.2446	-1.2749	-82.701	-68.566	1722.2043	-1.4473	1.3359	-1.2793	5.7306	-247.911	1916.091	NaN	NaN	NaN
3.314	-11.486	57.948	331.075	-0.036133	0.35742	-0.19629	-24.541	69.922	1422.3398	-0.97998	1.2212	-1.2593	-47.706	5.772	1662.6343	-1.4292	1.313	-1.2534	-13.3983	-179.653	1888.031	NaN	NaN	NaN
3.316	-9.60900000000001	48.859	345.453	-0.072559	0.2918	-0.24531	1.506	72.725	1382.853	-0.9585	1.1724	-1.2241	-64.341	14.694	1605.7106	-1.4214	1.2759	-1.2065	-13.439	-115.822	1855.07	NaN	NaN	NaN
3.318	-3.05099999999999	63.664	344.612	-0.061621	0.28711	-0.2333	-20.753	68.405	1370.6459	-0.94531	1.124	-1.1738	-79.113	58.65987	1563.50199	-1.4128	1.263	-1.1824	-79.9079	-99.342	1832.063	NaN	NaN	NaN
3.32	13.844	76.092	348.909	-0.071778	0.29531	-0.22237	-44.904	97.6763	1330.2411	-0.94434	1.0986	-1.1563	-43.845	21.9817	1542.6946	-1.3926	1.2617	-1.1602	-53.212	-31.9	1828.7344	NaN	NaN	NaN
3.322	-6.91	65.485	361.768	-0.0875	0.25264	-0.23994	-56.285	110.649	1318.3577	-0.93311	1.0552	-1.1167	-30.243	87.5058	1517.9967	-1.3511	1.2485	-1.1382	-37.482	1.503	1822.625	NaN	NaN	NaN
3.324	5.53600000000001	66.471	356.868	-0.053711	0.32764	-0.16504	-34.088	133.111	1283.009	-0.9126	1.0269	-1.0903	-25.149	94.4359	1471.0187	-1.3296	1.2427	-1.1274	16.4144	-9.108	1858.051	NaN	NaN	NaN
3.326	-2.452	59.649	365.753	-0.096094	0.2459	-0.23018	-16.515	159.5239	1222.1009	-0.88623	0.99854	-1.0601	-30.97	168.672	1420.049	-1.2832	1.2148	-1.1016	-30.155	-63.703	1865.526	NaN	NaN	NaN
3.328	9.26000000000001	67.564	351.635	-0.069043	0.31875	-0.1832	-36.954	162.96	1230.174	-0.84082	0.95703	-1.0234	-64.479	150.6648	1394.615	-1.2712	1.1897	-1.0852	-22.768	-104.753	1872.6892	NaN	NaN	NaN
3.33	-10.563	56.277	362.773	-0.12217	0.23164	-0.2457	-28.965	195.531	1189.555	-0.81445	0.93945	-0.99805	-110.3822	205.993	1374.462	-1.2612	1.1567	-1.0649	-24.965	-57.342	1824.781	NaN	NaN	NaN
3.332	-2.27800000000001	52.31	354.761	-0.10117	0.27197	-0.21035	-73.1746	211.921	1157.647	-0.76709	0.89502	-0.95654	-62.964	170.036	1356.686	-1.2539	1.1172	-1.0371	-27.397	-53.862	1823.7546	NaN	NaN	NaN
3.334	-8.38799999999999	45.337	342.747	-0.12988	0.2627	-0.23047	-72.098	227.188	1105.092	-0.73437	0.86279	-0.92822	-13.2	193.35	1325.921	-1.252	1.0996	-1.0215	-37.463	-19.627	1811.465	NaN	NaN	NaN
3.336	-12.117	58.058	360.926	-0.13252	0.23252	-0.24317	-40.439	222.087	1042.8551	-0.70264	0.82666	-0.896	1.25	159.62668	1297.2799	-1.2241	1.0698	-1.0015	-109.416	-65.291	1801.645	NaN	NaN	NaN
3.338	-11.274	56.642	382.952	-0.11601	0.30479	-0.19052	-60.9974	191.7191	1027.94	-0.66748	0.77783	-0.85303	-37.332	200.267	1272.348	-1.1892	1.0554	-0.98804	-96.087	-65.068	1802.437	NaN	NaN	NaN
3.34	2.254	63.07	386.33	-0.16406	0.22041	-0.24873	-43.547	184.7088	979.8485	-0.65332	0.75391	-0.83008	-38.7136	203.393	1221.648	-1.1411	1.0337	-0.96436	-102.508	-96.572	1765.284	NaN	NaN	NaN
3.342	-3.087	69.428	381.699	-0.1415	0.29257	-0.19746	-67.64969	200.6979	932.594	-0.61377	0.70557	-0.77979	-38.919	244.472	1177.6356	-1.0693	1	-0.93945	-45.545	-43.272	1737.991	NaN	NaN	NaN
3.344	-27.716	72.395	382.791	-0.19775	0.24902	-0.23877	-77.004	206.512	917.8769	-0.5874	0.66943	-0.75244	-15.017	216.475	1139.582	-1.0327	0.97705	-0.92529	-29.011	-21.8898	1655.632	NaN	NaN	NaN
3.346	-14.044	75.187	378.98	-0.21064	0.22627	-0.24365	-34.365	218.194	861.8605	-0.5542	0.63916	-0.72217	-22.437	210.142	1114.637	-0.96436	0.9292	-0.89014	10.628	15.1727	1583.346	NaN	NaN	NaN
3.348	-9.851	68.944	381.385	-0.19619	0.29033	-0.19405	-49.8266	205.136	826.3153	-0.51221	0.6001	-0.68018	-10.154	198.32	1079.183	-0.917	0.8916	-0.85864	-14.97	52.923	1541.453	NaN	NaN	NaN
3.35	-24.607	71.366	378.604	-0.25088	0.21299	-0.24873	-32.918	191.7226	767.5358	-0.49121	0.58008	-0.6582	-51.4646	277.098	1029.652	-0.87646	0.85303	-0.82373	-12.374	58.7587	1531.1691	NaN	NaN	NaN
3.352	-24.464	75.646	386.603	-0.21846	0.27549	-0.19795	-16.923	202.92	732.551	-0.44531	0.52588	-0.61133	-63.8461	301.817	991.1141	-0.83594	0.80078	-0.78516	-14.733	109.5586	1508.346	NaN	NaN	NaN
3.354	-16.897	67.929	393.228	-0.21875	0.29688	-0.19629	-34.376	198.146	738.8056	-0.41528	0.49047	-0.57812	-92.709	322.011	953.122	-0.82227	0.78125	-0.76758	45.2697	135.896	1437.193	NaN	NaN	NaN
3.356	-14.103	75.283	405.96	-0.23964	0.2625	-0.2459	-21.727	201.06	683.5652	-0.38428	0.46729	-0.5542	-47.845	290.97	908.97	-0.79004	0.73828	-0.73047	39.4118	221.422456	1347.073	NaN	NaN	NaN
3.358	-20.779	79.154	413.954	-0.21865	0.30166	-0.22802	-32.5324	197.20552	653.012	-0.34082	0.41406	-0.51367	-42.21	288.63	858.6444	-0.76196	0.70923	-0.70019	2.1995	240.646	1326.776	NaN	NaN	NaN
3.36	-31.625	65.971	422.431	-0.2292	0.2915	-0.24756	-2.636	183.9324	597.6439	-0.31689	0.39404	-0.49414	-15.996	287.274	800.231	-0.7207	0.68457	-0.66699	5.328	288.617	1322.208	NaN	NaN	NaN
3.362	-14.597	54.202	426.236	-0.22617	0.28984	-0.26074	-15.437	199.577	539.712	-0.27344	0.36328	-0.45752	-26.996	293.005	765.653	-0.68164	0.64844	-0.62695	-11.366	261.656	1321.4562	NaN	NaN	NaN
3.364	-8.295	63.55	417.911	-0.22607	0.30029	-0.25879	-14.523	185.2709	513.243	-0.24755	0.33228	-0.43139	-48.3005	299.779	727.236	-0.65234	0.625	-0.62988	30.094	271.349	1284.419	NaN	NaN	NaN
3.366	-0.706999999999994	67.86	412.371	-0.2414	0.28633	-0.26387	21.162	182.6262	460.399	-0.2124	0.30029	-0.40479	-55.8465	277.8896	672.544	-0.56543	0.57715	-0.60059	24.0904	228.484	1234.0773	NaN	NaN	NaN
3.368	0.222999999999999	60.695	440.439	-0.25703	0.28769	-0.26035	-29.539	188.545	434.971	-0.1665	0.26563	-0.35547	-29.874	244.36	627.267	-0.51123	0.54834	-0.56739	39.131	218.161	1212.4351	NaN	NaN	NaN
3.37	2.752	59.957	426.316	-0.27891	0.28848	-0.26699	2.849	162.918	418.5214	-0.14844	0.24512	-0.33984	-18.366	201.964	585.2825	-0.45313	0.51758	-0.53711	-18.5256	225.285	1172.4535	NaN	NaN	NaN
3.372	-12.308	74.487	433.544	-0.3002	0.29248	-0.26631	-25.317	165.7794	376.467	-0.1167	0.21533	-0.30615	-4.845	188.3781	559.379	-0.38379	0.45605	-0.49414	-5.487	218.825	1174.888	NaN	NaN	NaN
3.374	-8.179	72.485	450.279	-0.31641	0.2959	-0.26611	-24.414	159.055	370.1647	-0.086181	0.19922	-0.29712	-37.401	184.8131	538.4749	-0.35742	0.42676	-0.47656	20.756	229.858	1098.128	NaN	NaN	NaN
3.376	-12.396	66.598	476.174	-0.3291	0.3043	-0.27998	-9.928	167.829	341.8306	-0.049805	0.16992	-0.26514	-31.729	218.089	489.57	-0.30518	0.37354	-0.43896	26.119	159.989	1038.26	NaN	NaN	NaN
3.378	11.034	71.559	481.397	-0.34073	0.31572	-0.28965	-40.598	203.089	311.6075	-0.00097656	0.13086	-0.22607	-26.206	202.611	422.0163	-0.27514	0.3374	-0.40674	14.0713	190.202	952.729	NaN	NaN	NaN
3.38	3.339	68.967	471.903	-0.35127	0.31728	-0.29902	-56.796	193.226	307.8167	0.020996	0.11621	-0.21289	-21.594	196.841	359.707	-0.24121	0.29492	-0.37451	-22.913	186.69	936.328	NaN	NaN	NaN
3.382	-0.734000000000009	71.579	458.814	-0.35469	0.32871	-0.31231	-40.474	185.242	269.284	0.058105	0.065918	-0.18408	-28.856	135.1012	340.479	-0.20166	0.24512	-0.3418	-13.523	269.834	890.394	NaN	NaN	NaN
3.384	-1.58499999999999	75.913	483.865	-0.35986	0.33057	-0.32373	-72.8468	139.6176	277.8703	0.072021	0.053711	-0.18067	-16.321	174.623	313.353	-0.18018	0.21973	-0.32568	-25	285.368	833.799	NaN	NaN	NaN
3.386	0.495000000000005	81.448	469.699	-0.36523	0.34404	-0.3332	-65.35	114.8216	237.477	0.096191	0.020508	-0.15918	-20.596	170.1009	317.5027	-0.13916	0.16895	-0.29883	-22.057	304.077	759.26	NaN	NaN	NaN
3.388	8.884	74.776	486.19	-0.3711	0.34619	-0.34902	-61.293	140.436	223.5074	0.11035	-0.0019531	-0.15039	-24.045	192.1283	289.122	-0.10522	0.12476	-0.27881	-54.456	254.2008	692.4767	NaN	NaN	NaN
3.39	-9.128	68.944	505.917	-0.37617	0.35674	-0.35606	-37.967	116.682	206.5099	0.12061	-0.018555	-0.14746	-17.352	121.428	258.069	-0.082031	0.081543	-0.26465	-38.985	245.0205	651.5369	NaN	NaN	NaN
3.392	9.85700000000001	74.032	509.432	-0.37891	0.36738	-0.37402	-68.5839	135.333	169.4237	0.13232	-0.043945	-0.12891	-39.509	137.516	223.354	-0.052734	0.025391	-0.2373	-77.9171	264.6966	597.089	NaN	NaN	NaN
3.394	-7.57300000000001	74.329	534.813	-0.38867	0.37695	-0.38574	-94.7953	128.6252	160.6879	0.13965	-0.053711	-0.1294	-51.686	114.408	196.1591	-0.037598	0.0043945	-0.22949	-64.171	276.267	556.89	NaN	NaN	NaN
3.396	-6.69900000000001	80.142	528.091	-0.39531	0.39228	-0.39678	-49.883	100.7642	135.1691	0.14063	-0.055176	-0.13232	-47.068	190.872	159.929	-0.017578	-0.044434	-0.21191	-22.568	301.707	470.644	NaN	NaN	NaN
3.398	-16.112	86.608	540.455	-0.4039	0.40059	-0.4083	-54.189	126.33308	121.949	0.14648	-0.074219	-0.11621	-41.163	150.408	158.085	0.00097655	-0.06958	-0.20166	-28.4478	223.379	395.702	NaN	NaN	NaN
3.4	-16.229	86.958	528.353	-0.41485	0.41934	-0.42119	-57.6985	100.8372	137.1337	0.14014	-0.0625	-0.12451	-66.933	169.911	136.96	0.0073242	-0.10303	-0.19678	-22.66	207.3361	320.75	NaN	NaN	NaN
3.402	-6.035	90.125	531.432	-0.43095	0.42451	-0.43506	-41.986	122.514	104.649	0.13037	-0.060059	-0.12988	-80.0229	90.7081	131.1976	0.021973	-0.13184	-0.17773	-44.635	184.689	326.064	NaN	NaN	NaN
3.404	-16.866	87.85	539.573	-0.44092	0.43408	-0.44922	-70.7053	123.8897	95.537	0.12866	-0.045898	-0.12793	-71.313	135.27024	113.684	0.021484	-0.14648	-0.17236	-28.799	208.8668	323.193	NaN	NaN	NaN
3.406	-1.95	86.98	564.852	-0.44219	0.45059	-0.45352	-54.113	99.586	71.2213	0.12988	-0.028809	-0.12598	-59.0982	85.548	133.1388	0.025879	-0.16211	-0.16504	-20.057	214.036	325.1888	NaN	NaN	NaN
3.408	-7.087	81.927	564.596	-0.44033	0.47685	-0.45967	-53.351	114.874	50.4985	0.13135	-0.01709	-0.12207	-64.246	133.7029	118.7983	0.029053	-0.16773	-0.1521	-15.129	211.3697	249.073	NaN	NaN	NaN
3.41	1.066	102.522	564.995	-0.44541	0.47841	-0.47842	-41.039	78.38	74.894	0.12646	-0.00097656	-0.12695	-64.587	86.2535	118.145	0.021484	-0.16064	-0.15137	-24.459	186.8565	188.432	NaN	NaN	NaN
3.412	-5.541	110.154	555.562	-0.43584	0.50166	-0.48447	-11.073	76.418	43.5649	0.125	0.016113	-0.13037	-88.245	152.118	63.8006	0.017578	-0.146	-0.1543	-30.814	186.172	176.452	NaN	NaN	NaN
3.414	-7.965	107.46	580.68	-0.43555	0.51563	-0.49414	-29.802	67.6264	40.319	0.12989	0.027344	-0.12939	-72.929	79.707	35.898	0.01709	-0.13672	-0.15332	-40.942	207.494	188.78053	NaN	NaN	NaN
3.416	14.193	98.163	580.855	-0.43662	0.51592	-0.49287	-20.378	42.8725	33.997	0.13135	0.041504	-0.13232	-72.29	101.1247	41.575	0.015625	-0.10693	-0.1377	-28.605	189.049	189.393	NaN	NaN	NaN
3.418	-19.573	101.555	587.463	-0.43633	0.51504	-0.50117	-23.704	54.1963	32.691	0.13428	0.04248	-0.1333	-76.376	23.2396	51.246	0.019043	-0.077392	-0.14697	-26.149	182.745	128.504	NaN	NaN	NaN
3.42	0.704000000000008	104.264	598.473	-0.45157	0.49902	-0.51406	-21.365	6.727	42.9713	0.13965	0.044922	-0.12891	-73.133	76.272	56.732	0.011719	-0.050293	-0.15479	-29.103	120.992	113.0034	NaN	NaN	NaN
3.422	6.946	88.493	610.995	-0.44102	0.54063	-0.48457	-9.198	17.0521	16.5179	0.14551	0.046875	-0.12402	-42.5903	39.63	54.02	0.030273	-0.027832	-0.14746	-57.888	121.3413	88.257	NaN	NaN	NaN
3.424	8.488	105.086	606.455	-0.4624	0.51807	-0.51318	-16.915	34.7264	39.9273	0.15357	0.047363	-0.12744	-45.743	78.915	41.4785	0.035645	-0.020996	-0.14111	-48.592	101.9603	88.908	NaN	NaN	NaN
3.426	3.298	105.106	616.164	-0.4624	0.53154	-0.50576	-6.447	17.7856	41.596	0.15625	0.049316	-0.12939	-43.094	0.330000000000001	61.406	0.04834	-0.010254	-0.13867	-41.703	128.729	62.1112	NaN	NaN	NaN
3.428	2.137	99.662	614.158	-0.45635	0.54189	-0.496	-31.935	49.933	54.114	0.1709	0.046387	-0.12402	-75.712	50.831	43.518	0.060303	-0.0078127	-0.13012	-52.351	69.7946	34.6689	NaN	NaN	NaN
3.43	23.472	111.436	615.693	-0.47432	0.51299	-0.51475	-39.186	27.24547	67.025	0.18213	0.043457	-0.12012	-27.014	22.6334	28.4603	0.069824	-0.013184	-0.11816	-54.536	48.181	20.915	NaN	NaN	NaN
3.432	10.37	119.89	618.563	-0.45634	0.54082	-0.49239	-8.196	25.9804	40.40789	0.20117	0.039551	-0.1123	-6.306	84.878	20.42	0.078125	-0.028809	-0.104	-78.29088	34.561	56.0268	NaN	NaN	NaN
3.434	11.642	126.701	608.655	-0.45166	0.521	-0.50635	-38.302	33.341	28.068	0.21387	0.034668	-0.11084	12.918	33.35955	34.3038	0.072754	-0.031738	-0.10156	-74.9924	38.496	102.419	NaN	NaN	NaN
3.436	4.212	125.973	630.649	-0.45469	0.53106	-0.50391	-48.08	-7.968	30.3307	0.23242	0.026367	-0.10254	-24.877	32.206	46.9466	0.077637	-0.045898	-0.082031	-57.4108	38.358	93.954	NaN	NaN	NaN
3.438	21.195	133.753	631.242	-0.42959	0.54736	-0.4915	-49.83	35.13793	12.419	0.24121	0.021973	-0.104	-36.045	-29.24657	34.8117	0.081299	-0.053955	-0.07544	-53.76	2.4559	103.128	NaN	NaN	NaN
3.44	14.519	133.543	634.884	-0.44443	0.5208	-0.5165	-68.43	36.4326	15.6264	0.24707	0.0078125	-0.09668	-21.613	15.836	39.48452	0.088379	-0.061035	-0.067871	-83.8547	1.401	62.311	NaN	NaN	NaN
3.442	4.316	131.161	638.239	-0.4294	0.55586	-0.49609	-45.384	49.394	-2.0448	0.26465	-0.012695	-0.0625	-27.827	-1.525471	29.376	0.10059	-0.066895	-0.0625	-65.295	-24.145	42.356	NaN	NaN	NaN
3.444	-3.09	129.782	657.962	-0.42871	0.53613	-0.51074	-70.36738	56.372	13.1457	0.26269	-0.020997	-0.061035	-28.39	39.786	48.181	0.11548	-0.06836	-0.053711	-68.5058	17.534	24.464	NaN	NaN	NaN
3.446	7.24799999999999	152.615	645.76	-0.43877	0.54327	-0.52588	-55.98	9.7708	33.4769	0.25391	-0.035156	-0.056152	-29.847	23.1718	42.265	0.12891	-0.067871	-0.047363	-56.009	-4.155	32.6723	NaN	NaN	NaN
3.448	14.853	150.61	631.021	-0.42559	0.56523	-0.51348	-52.19	39.979	15.439	0.24414	-0.040527	-0.056152	-51.181	53.401	30.7907	0.14355	-0.069336	-0.041992	-27.557	4.579	17.06716	NaN	NaN	NaN
3.45	-12.139	157.485	630.723	-0.44941	0.53984	-0.54902	-77.5331	21.822	32.3716	0.24902	-0.04541	-0.046387	-36.122	22.6604	21.6737	0.14844	-0.071289	-0.036621	-54.0669	-22.8805	-5.969	NaN	NaN	NaN
3.452	4.53100000000001	165.101	642.941	-0.44697	0.57061	-0.54561	-41.221	27.10377	30.8487	0.26025	-0.058594	-0.025879	-32.708	25.792	27.60227	0.16553	-0.077637	-0.032227	-60.78	9.7235	-47.601	NaN	NaN	NaN
3.454	-0.649000000000001	154.718	634.529	-0.45117	0.58105	-0.55371	-55.2521	47.64607	31.455	0.26563	-0.066651	-0.017822	-51.309	-0.897000000000002	25.7296	0.18188	-0.085693	-0.024903	-70.3353	45.6891	-17.585	NaN	NaN	NaN
3.456	-0.711999999999989	147.587	635.846	-0.48653	0.58282	-0.57812	-44.45	6.88	23.015	0.2749	-0.070801	-0.012207	-49.726	17.856	28.126	0.19727	-0.087891	-0.019043	-46.045	62.311	34.5963	NaN	NaN	NaN
3.458	-8.29600000000001	139.203	662.15	-0.4917	0.62549	-0.56689	-50.518	41.595	-11.161	0.28027	-0.072266	-0.015137	-44.295	23.626	17.298	0.22705	-0.094727	-0.015137	-45.709	85.416	39.8876	NaN	NaN	NaN
3.46	-4.78700000000001	141.839	670.396	-0.51435	0.63642	-0.58877	-31.781	37.57773	3.754	0.28223	-0.075195	-0.012207	-67.4851	34.0859	12.975438	0.24414	-0.10059	-0.0068359	-23.934	76.516	14.8338	NaN	NaN	NaN
3.462	1.19399999999999	147.284	654.297	-0.53203	0.65341	-0.59512	-30.576	24.709	29.9718	0.29053	-0.087402	-0.0019531	-64.7818	38.2534	23.1836	0.26123	-0.104	-0.010254	-35.4282	98.15	-38.3073	NaN	NaN	NaN
3.464	-10.471	172.864	639.866	-0.53271	0.70947	-0.57373	-47.189	60.885	34.4832	0.2898	-0.0896	-0.0021972	-83.671	45.3815	15.9601	0.27588	-0.11669	-0.010498	-30.718	55.28435	-24.75	NaN	NaN	NaN
3.466	-1.545	174.399	633.801	-0.55635	0.70186	-0.59775	-26.958	15.5377	25.0474	0.28564	-0.10352	-0.0043945	-62.997	66.155	-3.6909	0.2876	-0.12402	-0.0083008	-38.201	63.345	4.261	NaN	NaN	NaN
3.468	-11.091	175.673	648.892	-0.56592	0.72119	-0.58936	-17.77	44.078	5.162	0.27295	-0.1123	0.0092773	-58.044	64.327	6.005	0.28613	-0.14063	-0.0019531	-23.557	31.7299	37.327	NaN	NaN	NaN
3.47	-2.985	171.339	639.637	-0.56006	0.76221	-0.57412	-24.142	39.5742	26.449	0.26855	-0.11475	0.0048828	-64.9804	65.25	32.962	0.29004	-0.146	0.0048828	-8.42	56.971	2.43261	NaN	NaN	NaN
3.472	-5.56	172.784	631.353	-0.58887	0.7458	-0.60479	-19.623	30.081	31.2255	0.24756	-0.11816	0.0078125	-74.791	32.802	47.187	0.27148	-0.15625	0.01416	-1.855	39.2168	17.6861	NaN	NaN	NaN
3.474	-5.348	164.273	654.721	-0.57617	0.78125	-0.56445	-3.992	88.864	21.1505	0.2207	-0.12109	0.011719	-54.006	38.633	31.2915	0.25244	-0.15943	0.010498	-26.752	53.3505	37.0771	NaN	NaN	NaN
3.476	-1.38799999999999	159.031	671.452	-0.58496	0.78379	-0.57793	-11.583	48.537	37.037	0.20801	-0.12012	0.010254	-46.331	30.868	22.36116	0.23633	-0.1626	0.0078125	-51.356	40.3183	70.49	NaN	NaN	NaN
3.478	3.521	169.946	641.601	-0.60195	0.7666	-0.58301	-31.759	61.105	24.4821	0.18555	-0.11328	0.010254	-58.0579	68.511	9.8956	0.21289	-0.15967	0.0039063	-45.236	55.682	77.255	NaN	NaN	NaN
3.48	4.902	181.023	625.435	-0.58477	0.80176	-0.54668	-35.254	44.3105	47.115	0.16992	-0.10571	2.6021e-15	-40.807	38.5882	37.74243	0.20605	-0.15576	0.0048828	-52.72	74.013	53.422	NaN	NaN	NaN
3.482	-0.631999999999991	185.289	623.466	-0.604	0.775	-0.5668	-13.003	4.1167	39.871	0.15576	-0.097168	-0.0039063	-30.25	83.091	35.994	0.19727	-0.14844	0.0019531	-35.284	51.7813	56.5843	NaN	NaN	NaN
3.484	12.333	184.677	633.907	-0.6084	0.78418	-0.54492	-25.892	49.602	27.9674	0.14307	-0.087891	-0.012695	-18.366	60.579	26.554	0.18994	-0.14209	-0.0034179	-63.06176	60.864	62.0052	NaN	NaN	NaN
3.486	-1.044	182.682	623.604	-0.59863	0.79073	-0.52383	-36.355	23.505	32.9573	0.13916	-0.082031	-0.02002	-29.721	80.289	18.64	0.18799	-0.13379	-0.0083008	-59.725	13.804822	72.378	NaN	NaN	NaN
3.488	-7.214	175.633	633.564	-0.61191	0.76855	-0.53711	-34.476	37.11	26.157	0.12598	-0.067383	-0.029785	-24.814	17.714	53.36169	0.18213	-0.12256	-0.018066	-76.31294	35.5201	51.051	NaN	NaN	NaN
3.49	-7.547	165.618	652.817	-0.58887	0.79746	-0.50313	-36.046	48.7928	35.77	0.11694	-0.055664	-0.039307	-36.487	42.142	52.5444	0.18262	-0.12744	-0.024414	-60.081	35.6315	60.53	NaN	NaN	NaN
3.492	1.64500000000001	155.0515	638.093	-0.60332	0.76816	-0.53291	-49.151	12.9787	41.435	0.11279	-0.049805	-0.047852	-44.088	22.1814	63.7612	0.18066	-0.12646	-0.021484	-61.80247	67.387	35.4303	NaN	NaN	NaN
3.494	-11.453	134.3217	647.3	-0.59277	0.79297	-0.49805	-51.757	54.228	27.93267	0.10156	-0.033691	-0.062988	-8.427	67.168	57.452	0.17456	-0.12329	-0.024414	-62.357	27.5526	30.403	NaN	NaN	NaN
3.496	-20.652	125.022	654.406	-0.60928	0.74844	-0.53125	-59.7364	16.9932	45.423	0.10107	-0.035156	-0.067871	-14.776	9.10188	69.02	0.16016	-0.12695	-0.025879	-65.558	29.88377	12.882	NaN	NaN	NaN
3.498	-10.391	121.384	654.11	-0.61406	0.7668	-0.51407	-55.235	30.35	47.9238	0.092285	-0.020508	-0.078613	-43.524	34.516	61.796	0.13525	-0.13428	-0.023926	-70.806	6.282	21.8245	NaN	NaN	NaN
3.5	-33.307	114.568	650.04	-0.64141	0.7293	-0.54414	-79.8621	56.6646	27.6501	0.087158	-0.012695	-0.09253	-41.498	-7.4545	42.783	0.12109	-0.13867	-0.026855	-53.426	-14.432	46.3686	NaN	NaN	NaN
3.502	-24.906	108.926	672.06	-0.64766	0.74453	-0.53145	-72.0541	5.681	42.3221	0.079102	-0.0053711	-0.10352	-34.256	42.1061	10.761	0.094238	-0.14404	-0.029785	-65.3888	-5.097	49.811	NaN	NaN	NaN
3.504	-38.736	104.142	705.7	-0.67725	0.76904	-0.53076	-54.898	51.3846	19.089	0.07373	0.0019531	-0.125	-17.011	8.2	35.3842	0.071533	-0.15088	-0.033936	-68.7729	-20.67585	20.7818	NaN	NaN	NaN
3.506	-14.266	115.37	755.53	-0.7084	0.72051	-0.57988	-55.238	22.822	36.0055	0.070313	0.0043945	-0.13623	-25.534	38.465	39.7758	0.053711	-0.15137	-0.037109	-63.4871	30.359	5.6493	NaN	NaN	NaN
3.508	-20.905	118.692	805.02	-0.68789	0.8122	-0.529	-44.602	29.51513	19.5277	0.066406	0.01709	-0.15869	-34.235	-8.5645	32.55397	0.039063	-0.1499	-0.046387	-36.968	14.8259	27.177	NaN	NaN	NaN
3.51	-28.308	135.589	858.69	-0.74414	0.79033	-0.58682	-58.3358	58.8829	22.236	0.074218	0.029541	-0.1792	-60.097	11.9555	20.796	0.037598	-0.15479	-0.054199	-35.75	35.0679	25.8598	NaN	NaN	NaN
3.512	-10.086	146.3501	936.84	-0.74717	0.80986	-0.60225	-51.422	17.2121	27.6751	0.074219	0.040527	-0.20605	-66.8801	0.141	23.0655	0.035156	-0.14453	-0.066895	-26.275	27.4829	9.9209	NaN	NaN	NaN
3.514	-13.942	162.777	1016.32	-0.75977	0.88281	-0.58789	-39.468	45.195	26.0297	0.079102	0.056152	-0.24072	-75.7834	44.4058	44.724	0.04126	-0.14599	-0.085938	-53.954	50.4808	-33.1166	NaN	NaN	NaN
3.516	-3.73099999999999	191.392	1068.81	-0.8459	0.81797	-0.69873	-30.011	24.094	40.138	0.081543	0.06543	-0.25391	-56.206	21.7778	63.501	0.04248	-0.14648	-0.097168	-25.402	42.5538	-27.185	NaN	NaN	NaN
3.518	-19.78	188.048	1146.78	-0.86601	0.84102	-0.70098	-29.484	-3.79788	44.051	0.083008	0.075684	-0.29248	-64.518	56.3304	12.824	0.060547	-0.15186	-0.12598	-20.804	65.971	-2.776	NaN	NaN	NaN
3.52	3.127	184.954	1201.84	-0.92734	0.88672	-0.70293	-39.964	41.6258	11.03	0.082519	0.086914	-0.31568	-61.708	27.1188	-13.054	0.067871	-0.15967	-0.13867	-19.837	66.277	38.3567	NaN	NaN	NaN
3.522	4.026	172.0843	1270.79	-1.0295	0.81563	-0.79004	-22.834	0.183	24.2704	0.080078	0.10059	-0.33936	-79.705	49.2583	-8.299	0.077637	-0.16846	-0.16357	-25.806	71.072	9.5872	NaN	NaN	NaN
3.524	-6.586	156.87	1318.99	-1.0728	0.83252	-0.80029	-10.916	45.107	15.255	0.073242	0.11377	-0.37793	-52.601	19.619	17.91944	0.072021	-0.1709	-0.18189	-41.59	78.485	10.51905	NaN	NaN	NaN
3.526	-1.067	100.352	1346.86	-1.1274	0.87871	-0.79043	-18.575	41.21411	22.0486	0.07373	0.12451	-0.3916	-58.437	37.56	8.379	0.058105	-0.17285	-0.19336	-38.053	65.234	27.1027	NaN	NaN	NaN
3.528	-19.912	30.282	1367.89	-1.2061	0.85947	-0.8372	-19.684	19.0862	24.78686	0.063965	0.14404	-0.4248	-43.019	25.224	-12.525	0.022461	-0.16455	-0.21729	-43.356	93.307	48.529	NaN	NaN	NaN
3.53	-8.876	-43.671	1350.19	-1.2405	0.87119	-0.85596	-19.012	52.394	6.867	0.05957	0.16015	-0.44629	-30.476	51.9987	-6.13	-0.0014648	-0.15527	-0.22803	-24.167	68.621	57.435	NaN	NaN	NaN
3.532	-34.367	-98.248	1314.41	-1.2421	0.95576	-0.81963	-18.029	11.1201	31.519	0.052734	0.18115	-0.46045	-45.5324	53.231	29.5751	-0.038574	-0.12549	-0.25146	-41.046	72.927	38.1064	NaN	NaN	NaN
3.534	-28.932	-126.152	1265.85	-1.271	1.0044	-0.82568	-15.069	43.477	31.8179	0.034668	0.19922	-0.48633	-61.705	69.128	41.56	-0.061036	-0.10254	-0.26807	-30.096	27.3196	25.316	NaN	NaN	NaN
3.536	-31.272	-149.99	1217.97	-1.3095	1.0058	-0.88213	-26.242	49.7793	38.8067	0.019531	0.20703	-0.49805	-52.939	74.417	20.0291	-0.078125	-0.072754	-0.28906	-48.067	30.4963	32.951	NaN	NaN	NaN
3.538	-26.662	-158.983	1159.47	-1.3059	1.0852	-0.86113	-29.542	14.8599	19.4647	-0.003418	0.21387	-0.51172	-42.22	71.759	17.152	-0.089355	-0.037109	-0.32275	-50.561	17.132	79.745	NaN	NaN	NaN
3.54	-32.787	-173.559	1131.8	-1.3125	1.173	-0.8248	-23.622	56.014	25.309	-0.052735	0.22217	-0.54297	-37.895	52.757	50.904	-0.098633	-0.020996	-0.34082	-74.9396	53.8961	75.588	NaN	NaN	NaN
3.542	-32.758	-168.865	1091.84	-1.3252	1.2225	-0.80586	-36.198	-3.9451	58.185	-0.10693	0.22754	-0.55615	-24.917	23.5032	87.575	-0.1123	-0.0019531	-0.37842	-52.298	33.2	88.782	NaN	NaN	NaN
3.544	-21.258	-166.727	1073.46	-1.3066	1.2695	-0.76953	-62.98	3.396	80.5823	-0.19727	0.22754	-0.57959	-28.674	11.2545	104.736	-0.12768	0.0048829	-0.40967	-58.4461	25.1016	67.963	NaN	NaN	NaN
3.546	-43.987	-158.076	1054.14	-1.2656	1.3278	-0.70186	-43.941	13.8103	102.313	-0.25488	0.2251	-0.60303	-21.903	-2.45802	105.236	-0.16064	0.010254	-0.44092	-64.5331	18.4336	41.9996	NaN	NaN	NaN
3.548	-54.793	-124.385	1029.3	-1.2223	1.3428	-0.63593	-11.187	-9.307	153.2628	-0.375	0.21191	-0.63867	13.648	14.7324	150.3841	-0.22754	0.0024414	-0.47803	-71.117	11.4081	45.7343	NaN	NaN	NaN
3.55	-61.479	-93.227	1023.65	-1.1812	1.3244	-0.57695	-15.722	38.5181	181.557	-0.4795	0.19751	-0.67505	0.204999999999998	-0.8055	230.0108	-0.28125	-0.0014648	-0.50586	-78.3502	57.7971	44.558508	NaN	NaN	NaN
3.552	-87.632	-83.971	1037.47	-1.1485	1.2795	-0.51269	-35.389	2.42174	276.0144	-0.59863	0.17773	-0.71289	1.142	41.255	310.946	-0.41553	-0.016602	-0.56543	-50.022	26.8348	27.9432	NaN	NaN	NaN
3.554	-88.576	-90.276	1006.738	-1.127	1.2148	-0.43555	1.903	23.6626	383.026	-0.81104	0.17529	-0.78271	31.3452	27.0189	421.262	-0.53906	-0.025879	-0.59961	-72.1378	23.1861	23.176	NaN	NaN	NaN
3.556	-89.9837	-125.618	993.313	-1.132	1.1502	-0.38408	1.5815	71.6471	543.087	-0.94873	0.17041	-0.82764	7.385	61.756	560.375	-0.69482	-0.036133	-0.64209	-55.258	-13.5121	12.567	NaN	NaN	NaN
3.558	-107.7522	-161.798	990.7031	-1.1479	1.0723	-0.34189	-38.0768	38.634	731.716	-1.2539	0.18066	-0.89355	-18.611	56.0137	775.6196	-0.95898	-0.040527	-0.71143	-58.3469	7.11556	-2.058	NaN	NaN	NaN
3.56	-122.67234	-208.7459	969.7309	-1.1815	1.002	-0.31494	13.416	70.349	829.983	-1.501	0.20239	-0.94336	-41.028	82.5577	929.1869	-1.1245	-0.032227	-0.75244	-32.807	28.1365	25.304	NaN	NaN	NaN
3.562	-121.394	-233.8049	973.8036	-1.2216	0.92569	-0.29932	10.47422	32.0997	979.4969	-1.7656	0.25098	-0.99805	-48.278	54.1392	1089.476	-1.478	0.015137	-0.84717	-61.061	57.4988	27.074	NaN	NaN	NaN
3.564	-109.409	-261.556	979.20959	-1.2715	0.85938	-0.30664	34.3366	47.933	1112.3284	-2.1035	0.39258	-1.0605	-40.948	87.034	1209.883	-1.7683	0.10425	-0.92504	-48.101	25.8588	33.1621	NaN	NaN	NaN
3.566	-119.789	-288.697	1011.9125	-1.3155	0.81358	-0.3294	32.8948	75.618	1216.784	-2.269	0.50635	-1.0991	-20.896	56.945	1360.2806	-2.0542	0.24268	-1.0015	-44.202	-11.6752	33.394	NaN	NaN	NaN
3.568	-110.314	-307.335	1059.18	-1.3551	0.80938	-0.35156	30.537	-11.078	1303.143	-2.5469	0.78125	-1.1895	15.0211	95.228	1467.358	-2.4043	0.57617	-1.0195	-38.466	-32.812	49.197	NaN	NaN	NaN
3.57	-115.7	-306.288	1070.952	-1.3848	0.83282	-0.37461	30.436	-13.046	1309.079	-2.7058	1.0359	-1.2712	8.62136	30.8953	1523.381	-2.6035	0.73535	-1.1025	1.264	-11.91622	93.502	NaN	NaN	NaN
3.572	-114.606	-278.196	1079.8823	-1.4026	0.87227	-0.39961	51.906	-74.2047	1324.546	-2.7827	1.2915	-1.3647	-33.936	16.6758	1468.529	-2.9038	1.2329	-1.2769	-3.467	25.0853	159.30425	NaN	NaN	NaN
3.574	-123.92	-250.464	1100.4172	-1.4155	0.93408	-0.41748	49.116	-115.196	1325.775	-2.6465	1.543	-1.4902	-21.1918	-104.224	1440.943	-3.0156	1.7192	-1.4428	1.273	5.544	209.3577	NaN	NaN	NaN
3.576	-138.707	-213.2745	1094.0848	-1.4364	1.0018	-0.44834	-2.883	-78.611	1318.49	-2.459	1.5977	-1.5449	-33.326	-127.175	1386.929	-2.9961	2.1387	-1.627	-31.7767	20.805131	256.705	NaN	NaN	NaN
3.578	-139.238	-176.049	1105.4372	-1.4514	1.0744	-0.47051	4.346	-116.181	1352.204	-1.8843	1.5513	-1.5991	-26.536	-174.818	1356.181	-2.4766	2.2852	-1.8008	3.754	29.2687	406.236	NaN	NaN	NaN
3.58	-132.662	-154.644	1102.618	-1.4702	1.1478	-0.5002	4.547	-97.268	1337.6948	-1.4006	1.4094	-1.572	-62.039	-151.044	1289.389	-1.9648	2.166	-1.7852	33.753	93.993	625.256	NaN	NaN	NaN
3.582	-139.3813	-161.429	1125.8446	-1.4762	1.2172	-0.52773	14.784	-119.313	1345.9526	-1.0176	1.2305	-1.5449	-79.691	-194.559	1233.5026	-0.83008	1.6875	-1.6367	11.134	91.606	859.34	NaN	NaN	NaN
3.584	-137.9414	-163.002	1137.2218	-1.4604	1.2896	-0.53662	31.574	-156.473	1349.256	-0.67334	0.95361	-1.5132	-114.6431	-142.265	1204.642	-0.053223	1.1372	-1.4253	-13.503	112.132	1036.931	NaN	NaN	NaN
3.586	-133.278	-161.746	1138.7444	-1.4163	1.3747	-0.53642	-7.317	-128.6247	1376.12261	-0.57617	0.82813	-1.5078	-82.4262	-141.797	1236.9011	0.11768	0.83252	-1.4233	1.616	85.084	1176.978	NaN	NaN	NaN
3.588	-120.588	-148.78761	1110.4741	-1.3655	1.4376	-0.56631	-21.804	-118.267	1445.567	-0.47119	0.62549	-1.5249	-62.694	-91.8634	1233.5549	0.24463	0.42676	-1.4238	-8.594	83.446	1353.591	NaN	NaN	NaN
3.59	-106.851	-134.4954	1089.887	-1.2843	1.5017	-0.6042	-83.891	-36.46	1455.4536	-0.43335	0.53002	-1.5447	-29.195	-82.538	1238.772	0.24756	0.25903	-1.4021	8.1887	72.816	1533.0598	NaN	NaN	NaN
3.592	-77.878	-142.7069	1093.424	-1.1941	1.5524	-0.64404	-86.0028	-1.59	1454.3829	-0.41162	0.45996	-1.5605	-19.076	-65.643	1247.828	0.19434	0.16602	-1.3594	24.671	48.836	1629.665	NaN	NaN	NaN
3.594	-83.424	-142.2345	1107.288	-1.1187	1.5864	-0.66943	-72.379	-78.019	1431.6475	-0.41602	0.40527	-1.5742	-23.052	-78.056	1272.994	0.033691	0.16309	-1.3652	34.352	19.952	1660.478	NaN	NaN	NaN
3.596	-92.245	-166.0519	1138.785	-1.075	1.5719	-0.68262	-94.7181	-123.532	1411.564	-0.43506	0.3833	-1.5776	-48.725	-67.719	1316.751	-0.053223	0.1958	-1.3882	20.9436	-83.982	1632.478	NaN	NaN	NaN
3.598	-99.191	-182.851	1126.896	-1.0443	1.5443	-0.66104	-75.0027	-219.626	1465.942	-0.51611	0.3584	-1.5718	-10.867	-103.262	1299.229	-0.2168	0.30811	-1.4175	-44.9243	-137.995	1607.805	NaN	NaN	NaN
3.6	-98.0293	-189.463	1121.909	-1.0275	1.4853	-0.62314	-96.0202	-256.644	1508.4708	-0.64209	0.35669	-1.5811	-24.952	-197.587	1296.883	-0.33447	0.39184	-1.435	-69.5063	-192.699	1607.301	NaN	NaN	NaN
3.602	-124.8146	-191.068	1092.722	-1.0215	1.4223	-0.56709	-110.35	-242.969	1521.73	-0.80664	0.39258	-1.5938	-5.142	-272.392	1330.018	-0.47656	0.46191	-1.459	-83.286	-160.912	1587.299	NaN	NaN	NaN
3.604	-118.952	-160.03113	1045.5549	-1.0176	1.3555	-0.52002	-71.9927	-276.773	1491.706	-1.0522	0.47998	-1.6226	-1.386	-313.17	1388.212	-0.72363	0.51172	-1.4883	-36.521	-185.392	1539.0488	NaN	NaN	NaN
3.606	-123.17	-145.779	1016.9533	-1.0018	1.3017	-0.47823	-42.751	-251.133	1462.446	-1.1929	0.55127	-1.6558	-5.50988	-276.423	1412.143	-0.86621	0.53271	-1.5078	-64.76	-176.849	1493.1243	NaN	NaN	NaN
3.608	-98.697	-116.296	976.48	-0.96885	1.2646	-0.42842	-47.931	-252.167	1520.152	-1.4331	0.71045	-1.7212	4.305	-292.244	1452.447	-1.1558	0.61816	-1.563	-51.283	-231.171	1461.8137	NaN	NaN	NaN
3.61	-113.261	-114.468	976.7878	-0.92939	1.2165	-0.39443	-35.369	-236.309	1578.417	-1.5806	0.83643	-1.7798	39.0998	-269.901	1461.7428	-1.3838	0.74463	-1.6221	-76.4214	-189.203	1476.5222	NaN	NaN	NaN
3.612	-96.751	-110.1444	952.4382	-0.87871	1.1901	-0.35322	-33.4824	-169.662	1631.1743	-1.7007	0.95361	-1.8394	57.275	-297.758	1520.171	-1.6128	0.90479	-1.7046	-89.674	-126.29	1546	NaN	NaN	NaN
3.614	-104.693	-105.583	917.866	-0.83008	1.168	-0.3125	-35.019	-147.8645	1667.836	-1.8008	1.0879	-1.9219	74.337	-217.8396	1582.676	-1.8608	1.1802	-1.8237	-107.828	-55.48	1584.326	NaN	NaN	NaN
3.616	-97.887	-75.504	875.425	-0.78682	1.1335	-0.3	-13.0843	-83.497	1657.1672	-1.8164	1.1318	-1.957	55.634	-170.032	1645.425	-1.9707	1.2871	-1.915	-119.1295	-46.12	1546.916	NaN	NaN	NaN
3.618	-88.912	-53.232	847.77	-0.75449	1.111	-0.28721	15.0666	-64.017	1626.4456	-1.8164	1.1641	-2.0254	61.085	-88.645	1663.185	-2.0522	1.4341	-2.0718	-87.051	-89.883	1446.184	NaN	NaN	NaN
3.62	-107.763	-47.147	842.7344	-0.73106	1.0922	-0.27041	14.916	-70.854	1603.174	-1.8132	1.1595	-2.0457	54.085	-119.876	1658.82	-1.9929	1.4426	-2.1355	-91.816	-151.301	1411.435	NaN	NaN	NaN
3.622	-93.815	-56.66	839.599711	-0.71289	1.0742	-0.2541	7.855	-30.601	1606.999	-1.7988	1.1445	-2.0547	23.5205	-58.581	1614.919	-1.873	1.4004	-2.1602	-49.694	-187.3742	1431.567	NaN	NaN	NaN
3.624	-113.122	-58.642	832.74356	-0.6958	1.0532	-0.23877	28.9793	-45.58	1639.4719	-1.8198	1.1079	-2.0581	60.005	-81.981	1582.488	-1.7148	1.3223	-2.1816	-68.785	-198.895	1510.9324	NaN	NaN	NaN
3.626	-114.0812	-61.651	807.81702	-0.68701	1.0288	-0.22763	71.916	-26.467	1629.934	-1.8531	1.0752	-2.0415	47.902	-26.172	1558.097	-1.6636	1.2974	-2.1948	-51.073	-260.082	1520.129	NaN	NaN	NaN
3.628	-107.8331	-69.694	798.6358	-0.67099	1.0052	-0.21348	62.038	-40.7762	1651.8592	-1.9004	1.0508	-2.0254	37.5229	-75.288	1612.149	-1.625	1.3047	-2.2344	-41.507	-269.229	1468.4431	NaN	NaN	NaN
3.63	-103.792	-77.12711	765.253	-0.64366	0.98291	-0.20645	89.847	-88.916	1654.9818	-1.9565	1.0073	-2.0142	28.50385	-54.197	1636.250142	-1.6355	1.3244	-2.2502	6.342	-305.902	1451.295	NaN	NaN	NaN
3.632	-104.309	-65.5948	716.313	-0.61045	0.95967	-0.20537	76.701	-73.033	1650.915	-1.9785	0.97266	-2.0098	43.596	-135.421	1644.367	-1.6499	1.3599	-2.2612	6.512	-263.137	1496.849	NaN	NaN	NaN
3.634	-100.08	-65.207	699.069	-0.57178	0.93604	-0.20459	62.7406	-95.824	1668.339	-1.9668	0.91211	-1.9824	61.717	-100.299	1642.133	-1.6577	1.395	-2.271	40.624	-227.079	1591.8342	NaN	NaN	NaN
3.636	-94.821	-58.2051	706.6435	-0.53056	0.91709	-0.20596	60.1202	-59.1387	1650.015	-1.9177	0.86352	-1.9714	50.543	-158.96	1657.767	-1.6377	1.3848	-2.2695	32.6472	-155.0057	1633.142	NaN	NaN	NaN
3.638	-74.289	-59.568	712.246	-0.48554	0.89141	-0.20557	34.177	-31.0397	1672.601	-1.8496	0.83203	-1.9648	41.9109	-88.4059	1687.142	-1.5542	1.2993	-2.2202	9.086	-116.346	1652.393	NaN	NaN	NaN
3.64	-66.803	-47.491	700.101	-0.45078	0.87774	-0.20752	39.1496	-51.286	1666.693	-1.7407	0.80615	-1.9478	40.0634	-91.4109	1688.405	-1.487	1.2077	-2.1814	25.597	-52.939	1578.04601	NaN	NaN	NaN
3.642	-65.769	-40.175	662.104	-0.41768	0.8585	-0.21416	34.7625	-9.029	1633.216	-1.6895	0.78906	-1.9375	33.96	-2.359	1642.156	-1.4351	1.104	-2.1323	25.01283	1.315	1543.79	NaN	NaN	NaN
3.644	-69.654	-7.09044	626.0943	-0.38574	0.83789	-0.2168	41.729	-22.3355	1605.218	-1.604	0.78174	-1.9038	30.2151	-55.61	1587.0357	-1.3809	0.9834	-2.084	53.3791	43.244	1538.498	NaN	NaN	NaN
3.646	-74.383	10.6249	589.6933	-0.35469	0.82168	-0.20869	45.419	1.46304	1544.183	-1.5581	0.78247	-1.8711	-5.58197	-19.767	1555.5679	-1.3535	0.92773	-2.0625	48.6915	61.7	1550.2544	NaN	NaN	NaN
3.648	-95.906	25.7681	567.3846	-0.3292	0.80049	-0.21143	20.5187	40.0937	1477.827	-1.5244	0.7793	-1.832	4.6391	-56.3969	1513.007	-1.2905	0.82861	-2.0269	80.3292	22.514	1568.4679	NaN	NaN	NaN
3.65	-91.154	17.992	567.4514	-0.30459	0.77041	-0.21729	10.1292	33.4108	1446.8871	-1.48	0.77002	-1.7749	-4.771	29.83	1486.2815	-1.2375	0.78638	-2.008	37.43237	20.4626	1562.3196	NaN	NaN	NaN
3.652	-87.874	-1.309	555.9423	-0.28096	0.74102	-0.23144	-18.6673	69.034	1435.349	-1.4604	0.7583	-1.7437	6.513	34.924	1445.719	-1.1836	0.75391	-2	84.112	-30.058	1560.15142	NaN	NaN	NaN
3.654	-76.117	-17.638	535.2343	-0.25879	0.71387	-0.23828	0.494400000000001	30.5496	1423.3728	-1.4277	0.73047	-1.6719	-11.649	94.522	1411.47	-1.1074	0.75195	-1.9863	84.721	-2.3565	1564.70929	NaN	NaN	NaN
3.656	-99.5848	-16.5228	517.7047	-0.2458	0.68955	-0.24346	22.5667	23.9081	1391.61318	-1.4001	0.69751	-1.6189	-9.243	61.666	1403.283	-1.0703	0.76172	-1.9707	82.81	-4.0616	1570.6635	NaN	NaN	NaN
3.658	-85.783	-13.7883	488.3565	-0.22773	0.66777	-0.24209	-8.6765	71.3241	1347.885	-1.3711	0.65625	-1.5684	-26.12	128.494	1394.61	-0.99902	0.7793	-1.9805	57.093	15.1023	1548.2062	NaN	NaN	NaN
3.66	-87.176	-1.5144	456.607	-0.21406	0.64863	-0.24092	-43.3659	46.6245	1336.217	-1.3296	0.59229	-1.5015	-16.26	133.403	1361.903	-0.94312	0.80689	-1.9548	54.965	-17.1707	1529.161	NaN	NaN	NaN
3.662	-71.092	20.4446	411.512	-0.21621	0.6334	-0.24414	-52.0006	102.545	1300.955	-1.3105	0.56445	-1.4707	-29.176	200.321	1345.762	-0.896	0.82861	-1.9312	13.075	-60.407	1505.896	NaN	NaN	NaN
3.664	-76.924	19.6827	414.2186	-0.20654	0.62256	-0.23877	-77.156	70.6986	1310.986	-1.2671	0.5249	-1.4155	-34.588	180.3	1323.453	-0.85889	0.85156	-1.8979	28.849	-67.169	1512.497	NaN	NaN	NaN
3.666	-54.53	5.6638	427.2725	-0.19326	0.59834	-0.2251	-59.094	48.5873	1293.1034	-1.2373	0.50098	-1.3711	-45.14	213.595	1301.72	-0.84521	0.8501	-1.8706	45.24	-70.414	1529.546	NaN	NaN	NaN
3.668	-76.465	-1.4091	425.442	-0.18818	0.57588	-0.22803	-31.8596	84.75442	1263.4556	-1.2046	0.479	-1.3296	-21.349	176.557	1276.05	-0.82813	0.84668	-1.8145	20.5546	-5.798	1479.858	NaN	NaN	NaN
3.67	-91.542	9.1612	416.9052	-0.18936	0.55556	-0.22803	-0.265000000000001	42.507	1244.308	-1.1719	0.46191	-1.2705	-24.595	194.528	1277.299	-0.83008	0.84399	-1.7683	38.7964	-2.806	1383.32	NaN	NaN	NaN
3.672	-92.624	24.3797	399.6694	-0.17178	0.52979	-0.22227	-9.3067	116.4938	1192.50824	-1.1479	0.44873	-1.2456	-41.024	144.047	1270.635	-0.83301	0.83203	-1.7188	2.0066	66.593	1300.128	NaN	NaN	NaN
3.674	-93.913	19.3661	391.7182	-0.15771	0.50977	-0.21191	-26.0979	124.135	1173.5843	-1.0879	0.42578	-1.1875	-52.229	157.795	1237.31	-0.83545	0.81201	-1.646	3.08	85.5497	1257.329	NaN	NaN	NaN
3.676	-93.927	34.817	366.102698	-0.15684	0.4834	-0.20752	-3.84	117.617	1145.5228	-1.0437	0.42139	-1.1555	-28.213	143.868	1193.089	-0.83838	0.8042	-1.6108	-18.633	127.6597	1253.782	NaN	NaN	NaN
3.678	-92.153	32.721	346.4649	-0.15772	0.45977	-0.20498	23.293	157.197	1081.426	-1.002	0.41602	-1.127	-44.123	185.082	1140.251	-0.8335	0.76611	-1.5327	-0.225000000000001	136.6027	1251.8392	NaN	NaN	NaN
3.68	-82.599	40.599	334.9201	-0.15732	0.43516	-0.19678	19.677	116.896	1060.036	-0.93359	0.41016	-1.0762	-31.218	190.054	1118.3266	-0.81787	0.73388	-1.4731	-42.286	159.636	1187.83	NaN	NaN	NaN
3.682	-71.53	38.3329	342.5158	-0.15713	0.40918	-0.18887	1.492	155.169	1011.2936	-0.90039	0.40137	-1.0508	-52.863	199.9853	1089.7232	-0.79053	0.69385	-1.4077	-4.048	167.476	1122.322	NaN	NaN	NaN
3.684	-73.733	45.152	331.036	-0.15869	0.38721	-0.18604	-14.388	180.619	982.9136	-0.83984	0.39551	-1.0059	-71.422	202.188	1035.489	-0.73975	0.63916	-1.3198	-37.046	197.704	1069.137	NaN	NaN	NaN
3.686	-72.404	38.023	312.784	-0.16348	0.36348	-0.18203	-16.276	173.018	964.9272	-0.7915	0.38843	-0.97314	-91.24672	213.811	973.847	-0.71631	0.60693	-1.2769	-66.652	213.239	1047.268	NaN	NaN	NaN
3.688	-72.654	36.826	312.095	-0.15635	0.34033	-0.18193	-31.635	239.168	894.724	-0.75244	0.3833	-0.93115	-78.4942	214.559	935.267	-0.66309	0.54834	-1.1792	-45.592	233.177	1038.807	NaN	NaN	NaN
3.69	-33.72	44.7986	324.073	-0.16416	0.31299	-0.1792	-42.776	147.9924	892.81358	-0.68652	0.37842	-0.88086	-70.836	224.079	923.219	-0.62891	0.50196	-1.1235	-29.5556	260.903	1006.22	NaN	NaN	NaN
3.692	-63.78	47.5367	306.6212	-0.16289	0.28965	-0.17627	-35.742	160.9558	847.1442	-0.65479	0.37646	-0.85107	-76.248	226.327	870.489	-0.59277	0.46191	-1.0566	0.170999999999999	222.069	968.499	NaN	NaN	NaN
3.694	-66.911	52.11	318.973	-0.15771	0.26611	-0.1709	-33.984	171.1823	812.8703	-0.60156	0.38184	-0.80078	-72.823	229.327	797.1219	-0.55469	0.41406	-0.96289	-37.3489	223.7389	954.034	NaN	NaN	NaN
3.696	-83.028	54.172	320.324	-0.14737	0.24472	-0.17168	-52.039	148.3055	791.679	-0.55737	0.37768	-0.75097	-79.265	234.5513	720.822	-0.53662	0.38867	-0.91748	-12.922	214.3341	942.526	NaN	NaN	NaN
3.698	-79.008	56.012	308.4861	-0.16055	0.23125	-0.17598	-30.297	232.498	742.1238	-0.521	0.37549	-0.70703	-59.863	219.057	687.961	-0.50439	0.35986	-0.83154	-69.035	233.08	926.253	NaN	NaN	NaN
3.7	-71.28	51.4043	302.3096	-0.15586	0.21641	-0.17637	-46.036	166.6052	704.1184	-0.47705	0.37061	-0.6499	-70.7375	214.0122	666.667	-0.47998	0.3352	-0.76733	-38.679	215.753	889.948	NaN	NaN	NaN
3.702	-81.509	44.1611	297.6608	-0.16064	0.20752	-0.18369	-23.872	161.207	646.806	-0.45459	0.35938	-0.61865	-47.785	189.453	642.0335	-0.44482	0.31885	-0.70459	-56.273	204.236	850.429	NaN	NaN	NaN
3.704	-61.364	27.7408	281.553	-0.14697	0.19824	-0.17969	-61.982	193.26	607.204	-0.4165	0.34814	-0.56006	-44.707	203.37408	582.652	-0.38623	0.28467	-0.61963	-50.566	194.839	800.309	NaN	NaN	NaN
3.706	-65.242	24.669	273.287	-0.15273	0.18359	-0.18535	-91.6845	138.416	620.7011	-0.3728	0.3313	-0.5	-64.478	173.926	528.5535	-0.36523	0.26758	-0.58008	-47.9449	216.811	755.477	NaN	NaN	NaN
3.708	-59.013	24.4925	259.4007	-0.15479	0.17246	-0.18623	-65.238	208.4126	592.8219	-0.33643	0.30908	-0.45068	-78.0906	179.0284	479.2984	-0.33203	0.23828	-0.50684	-55.86	259.464	699.8757	NaN	NaN	NaN
3.71	-78.262	36.2775	270.68	-0.14111	0.15801	-0.17842	-87.0428	170.708	575.198	-0.31299	0.29004	-0.40674	-92.5988	159.698	475.5561	-0.30274	0.21387	-0.45532	-83.8227	266.605	671.239	NaN	NaN	NaN
3.712	-54.941	45.7116	258.982	-0.15117	0.14922	-0.1915	-84.0243	178.638	528.758	-0.29834	0.2832	-0.38525	-77.431	194.432	445.8542	-0.27686	0.19092	-0.40039	-60.357	267.769	620.3444	NaN	NaN	NaN
3.714	-70.849	52.113	242.2697	-0.15527	0.13623	-0.19141	-76.053	216.936	452.473	-0.25391	0.25195	-0.32324	-50.547	184.6105	413.247	-0.24902	0.16455	-0.32959	-35.08	220.3847	575.0929	NaN	NaN	NaN
3.716	-87.626	55.591	257.705	-0.15703	0.12519	-0.1916	-72.092	145.65	446.645	-0.22949	0.2295	-0.27905	-25.367	209.172	384.29	-0.23584	0.14893	-0.2998	-54.684	219.7092	547.14	NaN	NaN	NaN
3.718	-81.887	56.4175	275.174	-0.15127	0.11533	-0.19112	-79.3874	194.37	400.474	-0.20996	0.21338	-0.25732	-46.329	179.3835	352.774	-0.20703	0.125	-0.23633	-36.747	198.962	526.069	NaN	NaN	NaN
3.72	-80.817	53.24	286.6857	-0.15635	0.10322	-0.1958	-79.4834	157.21001	394.503	-0.1748	0.18066	-0.19775	-60.141	203.959	312.607	-0.18652	0.10498	-0.19654	-49.0855	192.0058	522.59	NaN	NaN	NaN
3.722	-73.853	46.4728	271.25614	-0.16035	0.095802	-0.19766	-55.663	118.627	390.36311	-0.16748	0.16602	-0.17725	-32.918	180.5741	284.7409	-0.1626	0.086426	-0.15527	-67.9159	176.5362	453.02	NaN	NaN	NaN
3.724	-97.411	42.4965	252.078	-0.17188	0.092285	-0.20313	-35.515	167.5219	350.124	-0.13965	0.14502	-0.13525	-35.905	203.909	269.09389	-0.13379	0.059082	-0.11133	-67.56834	170.7133	374.824	NaN	NaN	NaN
3.726	-81.079	47.662	254.91073	-0.17979	0.08789	-0.20322	-36.01	100.207	337.0664	-0.11914	0.12988	-0.099366	-14.902	156.9	277.7918	-0.11914	0.049316	-0.088379	-25.365	162.159	328.501	NaN	NaN	NaN
3.728	-90.686	45.18	251.4914	-0.18389	0.091602	-0.20673	-17.979	151.22	307.3043	-0.09375	0.12842	-0.07373	-33.242	173.161	258.841	-0.10791	0.029785	-0.053711	-70.016	163.6479	282.887	NaN	NaN	NaN
3.73	-66.668	64.369	232.5828	-0.19482	0.089258	-0.21181	-27.685	166.089	297.682	-0.05957	0.11426	-0.030762	-37.771	152.1868	225.169	-0.1001	0.015625	-0.025879	-71.914	153.991	301.493	NaN	NaN	NaN
3.732	-69.946	50.42418	247.5631	-0.19453	0.090332	-0.21113	-12.795	126.56158	296.016	-0.039063	0.10938	-0.015137	-53.994	197.851	203.511	-0.091797	0.013184	-0.0092773	-56.201	117.7696	288.4333	NaN	NaN	NaN
3.734	-84.052	42.4904	272.4714	-0.19238	0.090332	-0.21094	-7.357	158.191	276.3647	-0.018555	0.099609	0.016113	-47.313	156.703	232.934	-0.077637	-0.0019531	0.022461	-60.19579	119.246	246.5116	NaN	NaN	NaN
3.736	-51.85	31.581	275.938	-0.19394	0.084668	-0.20781	-12.423	72.526	266.2344	-0.01001	0.090576	0.035645	-74.642	169.025	223.435	-0.067627	-0.0061035	0.040039	-24.004	120.2861	209.0624	NaN	NaN	NaN
3.738	-70.414	41.551	276.178	-0.1958	0.082324	-0.21495	-17.498	82.736	249.5749	-0.019531	0.085449	0.049316	-46.593	102.477	217.009	-0.048828	-0.0063477	0.054688	-45.8176	142.3099	189.41665	NaN	NaN	NaN
3.74	-68.357	43.609812	280.47942	-0.20166	0.07334	-0.21338	6.773	116.3494	226.2627	0.00097656	0.078125	0.080566	-40.574	118.694	166.3556	-0.03418	0.0058594	0.055176	-57.47	157.134	179.5072	NaN	NaN	NaN
3.742	-69.199	57.512	272.2478	-0.20996	0.07002	-0.21836	-14.639	90.335	198.657	0.0058594	0.073242	0.104	-32.307	70.467	183.088	-0.029785	0.016602	0.055664	-61.105	176.443	154.103	NaN	NaN	NaN
3.744	-57.637	60.028	272.012	-0.21533	0.064941	-0.21582	-6.444	145.239	151.4491	-0.0019531	0.086914	0.10547	-55.349	94.8252	164.803	0.0068359	0.032227	0.067383	-38.515	187.187	138.007	NaN	NaN	NaN
3.746	-67.548	54.612	287.711	-0.22314	0.066211	-0.21181	-22.984	102.219	146.0417	0.023194	0.089111	0.12012	-57.021	50.618	147.995	0.029053	0.042724	0.072021	-41.17	171.013	99.404	NaN	NaN	NaN
3.748	-85.461	37.29	295.889	-0.23134	0.064746	-0.21328	-38.058	83.2878	139.3619	0.039063	0.091309	0.13672	-52.524	86.882	69.686	0.047852	0.052734	0.074707	-7.308	144.7978	103.4199	NaN	NaN	NaN
3.75	-58.546	36.7008	300.21703	-0.24541	0.065918	-0.2125	-7.479	106.89342	126.456	0.068359	0.098145	0.14404	-14.363	51.6083	57.52	0.066895	0.062012	0.080078	-59.9548	137.336	91.30766	NaN	NaN	NaN
3.752	-72.258	35.054	295.1265	-0.25508	0.063379	-0.21856	-27.884	53.459	133.371383	0.083008	0.10107	0.14648	-34.832	83.3541	53.097	0.080078	0.062988	0.076172	-66.741	146.321	77.1198	NaN	NaN	NaN
3.754	-53.383	49.6279	280.268	-0.26123	0.066406	-0.21338	-32.574	92.453	99.8907	0.11572	0.09375	0.16357	-61.3001	47.3948	69.607	0.087891	0.073242	0.07959	-53.022	138.014	65.664	NaN	NaN	NaN
3.756	-64.052	49.8535	295.1885	-0.26846	0.066113	-0.21006	-58.201	95.3374	80.942	0.14795	0.092529	0.17065	-61.834	69.3873	38.797	0.093506	0.076904	0.089843	-31.236	126.247	72.4174	NaN	NaN	NaN
3.758	-66.543	56.3225	285.0412	-0.26884	0.070704	-0.20928	-71.9785	72.4479	75.0386	0.16992	0.081055	0.18799	-80.2227	26.086	37.329	0.092285	0.080078	0.096191	-62.286	81.296	72.7465	NaN	NaN	NaN
3.76	-69.296	52.935	286.6914	-0.27744	0.071094	-0.21084	-52.0578	114.063	51.9078	0.16553	0.080078	0.18115	-84.2185	36.6884	14.5749	0.089844	0.085449	0.10205	-43.24	82.9762	100.302	NaN	NaN	NaN
3.762	-70.557	51.2022	305.603	-0.28652	0.07666	-0.21113	-72.5353	68.49	57.32534	0.17725	0.079102	0.18408	-57.3447	-2.7369	39.759	0.092285	0.086426	0.10889	-48.084	76.2743	89.13571	NaN	NaN	NaN
3.764	-59.081	40.2133	339.361	-0.29834	0.075195	-0.20898	-75.1261	63.7132	59.9036	0.18994	0.070313	0.19775	-33.682	44.9883	11.017	0.088379	0.088867	0.11816	-68.929	67.5608	102.216	NaN	NaN	NaN
3.766	-74.204	49.8089	354.4186	-0.30801	0.080078	-0.20264	-55.786	51.7011	41.828	0.19238	0.067871	0.20118	-26.179	33.8066	-6.11	0.093262	0.085205	0.12574	-49.447	42.3115	88.091	NaN	NaN	NaN
3.768	-87.557	45.545539	346.6954	-0.32256	0.080957	-0.20098	-83.7167	4.007	33.26	0.19434	0.056641	0.20605	-48.505	53.748	-21.6028	0.1001	0.092285	0.13623	-69.26131	-0.261000000000001	63.115	NaN	NaN	NaN
3.77	-103.719	60.928	334.2301	-0.34483	0.089551	-0.19707	-71.966	44.483	18.466	0.18945	0.05957	0.19873	-51.741	9.076	11.57	0.11768	0.094727	0.15186	-20.179	18.563	50.943	NaN	NaN	NaN
3.772	-70.093	68.5897	340.8394	-0.36484	0.094727	-0.19014	-56.355	33.8405	12.858	0.18896	0.057129	0.19629	-35.649	13.733	-3.4275	0.12402	0.10303	0.15723	-50.766	-0.7804	38.331	NaN	NaN	NaN
3.774	-90.597	70.9851	335.3501	-0.38281	0.10107	-0.18262	-55.257	37.824	19.3042	0.19482	0.052734	0.21143	-12.829	-3.858	13.2211	0.15918	0.11084	0.16943	-59.272	-0.596	57.0654	NaN	NaN	NaN
3.776	-87.244	76.4675	340.2467	-0.40537	0.10791	-0.17734	-23.091	76.627	27.0427	0.19947	0.055176	0.21338	-9	37.66	13.9176	0.1936	0.10938	0.18188	-83.6313	-12.93478	45.3034	NaN	NaN	NaN
3.778	-84.135	61.3851	356.4694	-0.41699	0.11231	-0.17168	-65.0798	56.134	14.0526	0.20117	0.057617	0.2124	-24.981	32.196	34.0089	0.21973	0.10889	0.19092	-41.054	15.841	22.989	NaN	NaN	NaN
3.78	-80.811	59.078808	376.2031	-0.4291	0.11856	-0.17168	-42.834	44.692	35.058	0.22705	0.057617	0.22314	-48.202	59.6407	35.6517	0.26855	0.098145	0.20264	-40.442	24.4661	-0.648999999999997	NaN	NaN	NaN
3.782	-80.852	61.577	399.37204	-0.43799	0.12412	-0.16982	-27.647	50.067	51.7003	0.23877	0.059571	0.22265	-74.3454	55.11	15.7714	0.28467	0.084961	0.2041	-33.277	38.7538	12.018	NaN	NaN	NaN
3.784	-94.891	72.3585	395.84339	-0.44287	0.12549	-0.16846	-48.432	29.219	48.0548	0.24951	0.067871	0.2124	-63.32	76.9919	23.1951	0.31104	0.055664	0.21484	-61.733	30.374	22.646	NaN	NaN	NaN
3.786	-81.097	70.22928	411.5326	-0.45157	0.12979	-0.16367	0.622	51.8547	26.9379	0.26855	0.064941	0.21484	-45.638	66.974	40.748	0.32642	0.026611	0.22071	-71.845053	28.0175	20.05452	NaN	NaN	NaN
3.788	-84.258	69.6812	422.0512	-0.45927	0.13291	-0.16934	-10.479	36.209	16.294	0.28271	0.061523	0.21875	-14.889	70.3891	67.172	0.33301	-0.0073242	0.22119	-30.815	37.2831	-0.390899999999999	NaN	NaN	NaN
3.79	-76.944	85.016	420.61999	-0.46435	0.13759	-0.1709	-12.623	25.5563	21.35089	0.29004	0.050781	0.21289	-30.177	73.465	34.369	0.33057	-0.062988	0.22705	-44.0389	30.0327	-11.0308	NaN	NaN	NaN
3.792	-86.768	82.405	428.2801	-0.47754	0.14726	-0.16934	3.30099999999999	48.396	16.5069	0.29907	0.030762	0.21924	-30.37	78.445	24.764	0.3208	-0.083496	0.22559	-15.545	34.181	-1.145	NaN	NaN	NaN
3.794	-82.83	70.5823	440.8935	-0.48486	0.15771	-0.17139	-25.825	29.38505	19.414	0.29785	0.013672	0.21924	-56.3619	65.539	23.3729	0.28467	-0.13086	0.22412	-57.536	32.1535	3.743	NaN	NaN	NaN
3.796	-86.397	60.4706	449.6083	-0.49355	0.16055	-0.17031	11.836	38.0626	32.525	0.27588	-0.013672	0.21631	-47	35.0569	41.623	0.25512	-0.15406	0.22266	-31.407	58.2172	-10.891	NaN	NaN	NaN
3.798	-90.108	71.0386	453.8823	-0.50214	0.16992	-0.16445	-5.046	52.05	35.6618	0.2627	-0.021484	0.21191	-56.67	30.9142	46.49	0.22363	-0.16797	0.21924	-61.401	59.697	-24.08	NaN	NaN	NaN
3.8	-66.244	69.3948	471.3673	-0.51426	0.17618	-0.15977	-31.544	23.9283	48.7278	0.22314	-0.032227	0.20557	-22.661	34.9171	50.3102	0.19141	-0.1665	0.21094	-23.14	69.797	12.0247	NaN	NaN	NaN
3.802	-68.652	69.9307	495.1864	-0.5292	0.18018	-0.15605	2.482	37.101	48.739961	0.19751	-0.039307	0.20166	-59.029	61.177	39.648	0.18799	-0.16016	0.2124	-49.572	43.815	28.0616	NaN	NaN	NaN
3.804	-47.598	81.3305	506.4299	-0.53857	0.18311	-0.14893	-40.078	41.343	35.69573	0.16846	-0.034668	0.1958	-57.4255	42.6838	65.679	0.18359	-0.13135	0.20166	-41.115	45.7843	55.96	NaN	NaN	NaN
3.806	-73.333	89.2902	509.8051	-0.55742	0.18613	-0.14991	-45.8209	31.5351	36.669	0.13965	-0.028809	0.18799	-72.4907	32.9185	49.2163	0.17261	-0.10229	0.18995	-37.244	55.049	41.9256	NaN	NaN	NaN
3.808	-78.657	91.566	519.0304	-0.56357	0.19316	-0.14873	-45.02	48.573	29.0276	0.13232	-0.021973	0.18408	-68.371	10.5281	50.925	0.16748	-0.072754	0.18066	-65.6373	65.857	42.15612	NaN	NaN	NaN
3.81	-66.77	91.2	533.0027	-0.57451	0.19746	-0.14873	-76.615	41.77023	17.3683	0.1123	-0.010742	0.17334	-54.717	17.4635	33.8918	0.16504	-0.041016	0.17139	-39.653	78.298	48.5768	NaN	NaN	NaN
3.812	-88.814	96.512	542.51641	-0.5749	0.20967	-0.15069	-37.259	35.6114	22.13615	0.10767	0.00097655	0.17139	-38.984	7.626	48.4704	0.16113	-0.02832	0.16992	-47.29	65.774	51.1254	NaN	NaN	NaN
3.814	-85.39	91.0078	551.679	-0.57617	0.22266	-0.15479	-52.258	41.923	33.99659	0.10254	0.012695	0.16016	-43.536	27.4777	49.244	0.14697	-0.0014648	0.16357	-20.867	75.4888	52.656	NaN	NaN	NaN
3.816	-100.493	82.2205	568.6806	-0.57959	0.23975	-0.15625	-78.9728	12.866	27.912	0.10156	0.021484	0.16357	-32.576	10.77256	43.21	0.13476	0.0053711	0.16187	-56.408	52.331	33.1132	NaN	NaN	NaN
3.818	-58.212	81.1444	579.7461	-0.57432	0.2503	-0.16211	-57.222	32.6425	42.98	0.10449	0.029785	0.15625	-61.036	29.0236	10.2105	0.12354	0.016113	0.16406	-36.915	61.985	43.20493	NaN	NaN	NaN
3.82	-94.895	93.687	585.9789	-0.57471	0.26943	-0.16484	-75.8391	31.698	14.632	0.10986	0.037109	0.15527	-48.766	16.589	5.474	0.10449	0.027832	0.1626	-82.8424	35.077	46.0631	NaN	NaN	NaN
3.822	-86.036	103.34374	593.187394	-0.57607	0.28623	-0.16904	-73.073	7.971	25.1777	0.11524	0.042725	0.15455	-40.236	32.115	4.863	0.097656	0.032227	0.16016	-45.899	51.9572	53.32	NaN	NaN	NaN
3.824	-79.795	111.8098	608.18619	-0.57666	0.30127	-0.17529	-61.04	41.3714	37.496	0.12207	0.049805	0.1499	-25.185	26.7361	34.452	0.09082	0.041016	0.15527	-61	38.072	51.384	NaN	NaN	NaN
3.826	-80.338	110.0027	625.36317	-0.5833	0.32207	-0.17666	-78.1351	36.4871	23.2325	0.13281	0.060059	0.14746	-23.95	49.014	10.9267	0.087891	0.049316	0.14917	-48.733	23.333	73.905	NaN	NaN	NaN
3.828	-81.245	107.2122	626.3888	-0.59561	0.33691	-0.18203	-27.794	32.8817	39.9193	0.1377	0.0625	0.14355	-32.869	22.8687	24.6981	0.089844	0.055664	0.14355	-67.3204	-4.355	63.786	NaN	NaN	NaN
3.83	-94.441	93.8203	637.49	-0.6081	0.3498	-0.18008	-53.326	45.331	30.3804	0.14941	0.064941	0.13477	-48.306	35.202	18.3214	0.097168	0.064453	0.13379	-64.410652	-15.774	40.6227	NaN	NaN	NaN
3.832	-86.15	76.7426	680.2827	-0.62822	0.3667	-0.18144	-65.6657	18.868	24.0117	0.15063	0.070069	0.13281	-66.4454	3.5676	34.687	0.10059	0.067871	0.12695	-40.761	19.158	29.138	NaN	NaN	NaN
3.834	-102.349	81.3439	681.4494	-0.65088	0.37695	-0.18359	-14.797	27.9226	29.4174	0.15137	0.072754	0.13086	-42.702	31.6608	22.08	0.10791	0.083008	0.11475	-41.877	29.9951	11.547	NaN	NaN	NaN
3.836	-98.528	87.6925	690.6331	-0.67422	0.39297	-0.18555	-50.27	27.0686	19.1097	0.15967	0.07959	0.12549	-40.838	20.2481	27.187	0.1211	0.094727	0.10669	-15.681	35.8638	33.9431	NaN	NaN	NaN
3.838	-99.159	97.9724	670.9345	-0.69345	0.4082	-0.18906	-12.628	-1.264	29.279	0.15723	0.081543	0.12305	-24.246	60.592	-3.63	0.12109	0.10645	0.10498	-74.179	-5.72149	20.3929	NaN	NaN	NaN
3.84	-103.664	102.2962	686.0656	-0.7044	0.42891	-0.1836	-9.093	40.858	22.029	0.15576	0.090332	0.11865	-26.593	35.679	31.902	0.12256	0.1167	0.077148	-53.876	-7.6116	6.962	NaN	NaN	NaN
3.842	-84.666	111.686	703.7739	-0.721	0.4539	-0.18115	-39.718	28.791	6	0.15015	0.095459	0.10572	-32.917	51.61	21.6561	0.11914	0.12451	0.064453	-54.7556	4.9971	1.517	NaN	NaN	NaN
3.844	-89.808	119.0171	696.30752	-0.73047	0.47754	-0.18359	16.602	44.1829	20.0731	0.14648	0.10059	0.099121	-62.966	31.1186	14.9815	0.12158	0.13379	0.04248	-16.578	36.42	18.7221	NaN	NaN	NaN
3.846	-65.478	109.3894	723.40268	-0.74473	0.50449	-0.18604	-14.521	67.828	17.032	0.13281	0.1123	0.084473	-36.655	58.0004	16.43807	0.11328	0.14746	0.024658	-57.029	42.351	10.7029	NaN	NaN	NaN
3.848	-71.091	104.1606	735.1362	-0.7586	0.52696	-0.19043	-20.093	21.1323	20.0568	0.12549	0.12061	0.078613	-41.228	50.299	42.2025	0.11133	0.1543	0.0014648	-30.866	56.81014	19.3926	NaN	NaN	NaN
3.85	-65.934	102.4829	744.344725	-0.77501	0.55078	-0.18691	7.59	32.9683	42.985	0.10498	0.13965	0.056641	-24.316	74.236	47.9379	0.1001	0.17725	-0.025879	-58.998	55.017	-31.17	NaN	NaN	NaN
3.852	-74.564	107.1686	728.2709	-0.79824	0.57911	-0.18281	-36.587	40.92	29.8451	0.095457	0.15991	0.039063	-63.993	63.273	59.612	0.094727	0.18604	-0.041504	-53.1647	53.3629	-19.7462	NaN	NaN	NaN
3.854	-66.022	114.8611	736.2235	-0.81592	0.59814	-0.17822	-15.596	23.4276	27.98034	0.080566	0.17969	0.021484	-69.186	76.101	8.719	0.091309	0.20605	-0.074707	-16.452	62.07	17.5201	NaN	NaN	NaN
3.856	-71.07	129.15	744.8268	-0.84775	0.61992	-0.17568	-22.674	54.311	17.735	0.067383	0.21289	-0.0058594	-83.716	54.776	24.202	0.088379	0.23462	-0.09741	-30.138	62.454	38.0426	NaN	NaN	NaN
3.858	-80.767	138.062	739.4709	-0.8789	0.64179	-0.17236	-51.749	37.038	6.9873	0.060547	0.22949	-0.02002	-57.78	73.3527	28.608	0.085938	0.26318	-0.11914	-30.14	72.651	41.2062	NaN	NaN	NaN
3.86	-81.944	130.646	746.7685	-0.91014	0.66366	-0.17275	-28.784	36.8308	11.834	0.050293	0.26123	-0.047852	-59.6968	52.96	45.567	0.085449	0.30615	-0.15918	-52.3036	45.896	43.2539	NaN	NaN	NaN
3.862	-84.252	127.3414	762.1366	-0.94013	0.68466	-0.17305	-37.432	62.575	6.6	0.042724	0.28809	-0.066651	-20.443	65.321	35.317	0.086914	0.32813	-0.17432	-39.771	30.8496	43.9392	NaN	NaN	NaN
3.864	-48.419	133.0217	764.0489	-0.97168	0.71484	-0.17383	-46.774	35.9569	18.7786	0.037109	0.31055	-0.091309	-39.708	36.027	40.3228	0.089355	0.38525	-0.21436	-74.011	-1.4328	71.234	NaN	NaN	NaN
3.866	-76.833	135.9304	750.6934	-0.99417	0.73438	-0.17715	-48.465	52.289	31.3795	0.034668	0.34082	-0.12695	-66.761	36.8415	55.587	0.084473	0.41577	-0.22925	-17.639	29.552	130.0064	NaN	NaN	NaN
3.868	-66.226	140.6271	749.9669	-1.0179	0.75714	-0.18399	-81.4103	37.8898	35.926	0.027832	0.35254	-0.13965	-61.905	8.4318	70.751	0.074707	0.4585	-0.25244	-70.76	36.509	153.6808	NaN	NaN	NaN
3.87	-67.006	139.29591	748.8283	-1.0371	0.78177	-0.1922	-64.932	11.4573	49.095	0.032227	0.36377	-0.15967	-33.985	19.014	50.887	0.070801	0.50977	-0.28174	-63.584	37.154	231.0943	NaN	NaN	NaN
3.872	-53.643	151.1271	759.7746	-1.0518	0.8091	-0.19288	-63.0655	60.049	31.2778	0.027099	0.38745	-0.19776	-54.101	15.1108	44.1716	0.074219	0.5498	-0.30298	-99.957	-0.234000000000002	290.831	NaN	NaN	NaN
3.874	-66.727	143.92	773.7556	-1.0688	0.82666	-0.20459	-62.9262	29.508	27.259	0.013184	0.41357	-0.24512	-8.907	25.1102	36.587	0.083496	0.58398	-0.33398	-102.508	-15.26599	400.8072	NaN	NaN	NaN
3.876	-75.607	149.0242	777.8451	-1.0751	0.84597	-0.22049	-48.122	21.367	68.3007	-0.017578	0.44629	-0.29248	-40.485	-1.669	82.139	0.095215	0.62354	-0.37646	-82.597	20.8933	531.91	NaN	NaN	NaN
3.878	-80.201	148.55	805.031	-1.0776	0.86799	-0.22818	-97.3886	36.119	58.919	-0.030273	0.45654	-0.30811	-60.935	10.0548	116.1373	0.099121	0.64063	-0.40088	-60.416	43.9803	700.9702	NaN	NaN	NaN
3.88	-102.223	154.8124	789.8467	-1.0804	0.88869	-0.23874	-68.9347	-2.18278	72.5992	-0.081055	0.46289	-0.33887	-64.353	19.7236	132.0587	0.086914	0.65479	-0.45264	-60.828	64.227	878.204	NaN	NaN	NaN
3.882	-77.558	156.17395	763.3824	-1.0843	0.90793	-0.25005	-38.045	24.5457	118.5755	-0.13452	0.47388	-0.37549	-37.922	34.6345	210.6248	0.048095	0.64624	-0.49854	-103.416	41.3671	1041.692	NaN	NaN	NaN
3.884	-90.665	159.1446	758.153	-1.0903	0.93213	-0.26904	-85.538	-0.5523	158.5235	-0.19727	0.46729	-0.41357	-61.892	39.377	336.7074	-0.022949	0.62354	-0.56982	-53.349	51.32466	1175.7	NaN	NaN	NaN
3.886	-96.672	159.341	758.314485	-1.0817	0.94799	-0.27629	-63.074	-18.5542	229.3325	-0.30957	0.45166	-0.46436	-71.914	39.1101	504.589	-0.16357	0.56836	-0.66211	-96.0629	38.0767	1320.023	NaN	NaN	NaN
3.888	-76.548	165.137	764.2233	-1.065	0.95981	-0.29096	-53.573	40.248	319.341	-0.38477	0.4502	-0.49805	-76.747	63.79	689.536	-0.26367	0.54395	-0.70703	-67.145	57.863	1447.241	NaN	NaN	NaN
3.89	-83.623	180.298	753.1116	-1.0485	0.96154	-0.30334	-71.041	25.296	453.373	-0.59814	0.396	-0.56934	-66.476	71.144	876.64	-0.52539	0.49023	-0.80273	-135.373	10.502	1507.613	NaN	NaN	NaN
3.892	-82.415	171.6883	781.712	-1.0185	0.96015	-0.31622	-66.642	40.9794	646.309	-0.823	0.36792	-0.6294	-70.788	72.7753	1058.303	-0.78394	0.48242	-0.86645	-126.721	-24.997	1505.941	NaN	NaN	NaN
3.894	-95.616	178.9855	782.303	-0.98828	0.94922	-0.33203	-84.357	33.7331	812.782	-1.0913	0.33057	-0.69385	-89.554	36.159	1283.89	-1.0752	0.49414	-0.93164	-150.973	-112.751	1420.661	NaN	NaN	NaN
3.896	-60.355	177.18306	784.6903	-0.95793	0.94111	-0.3485	-47.475	-11.8547	946.633	-1.4512	0.33496	-0.73828	-124.369	54.133	1409.571	-1.502	0.58203	-1.0078	-119.95127	-166.065	1373.92	NaN	NaN	NaN
3.898	-94.715	179.9329	764.8271	-0.93505	0.92469	-0.36472	-41.803	26.4505	1077.993	-1.6074	0.34375	-0.74609	-123.479	51.758	1496.1137	-1.7207	0.65723	-1.0352	-92.78597	-219.786	1317.811	NaN	NaN	NaN
3.9	-83.053	182.6876	762.20924	-0.91459	0.9047	-0.37768	-112.6439	10.305	1232.958	-1.9648	0.42383	-0.78613	-108.49	34.534	1492.3925	-2.1094	0.92773	-0.99219	-69.5845	-225.91	1297.121	NaN	NaN	NaN
3.902	-85.702	185.871	758.8728	-0.89833	0.8925	-0.38934	-105.132	-18.898	1375.1202	-2.1697	0.55054	-0.86303	-117.7956	-23.416	1481.539	-2.3838	1.2002	-1.0474	-58.422	-227.463	1268.543	NaN	NaN	NaN
3.904	-87.858	191.97	734.705	-0.89746	0.875	-0.39063	-112.466	-34.52	1416.7801	-2.3125	0.66211	-0.92578	-112.8956	-47.0216	1433.095	-2.5327	1.5103	-1.1333	-105.7748	-246.813	1244.62	NaN	NaN	NaN
3.906	-87.6	191.2627	722.8906	-0.8976	0.8685	-0.39884	-121.151	-139.1914	1418.088	-2.3965	0.88672	-1.0098	-103.972	-82.079	1418.367	-2.4468	1.8521	-1.2788	-65.303	-274.042	1265.023	NaN	NaN	NaN
3.908	-100.942	189.7818	720.9072	-0.90265	0.86523	-0.39936	-92.978	-185.939	1383.339	-2.3901	1.0181	-1.0464	-124.522	-88.0945	1374.7272	-2.2573	1.9751	-1.3354	-74.496	-302.244	1303.145	NaN	NaN	NaN
3.91	-69.162	184.8175	731.3218	-0.90149	0.86634	-0.40232	-111.3464	-186.988	1373.05	-2.2925	1.2954	-1.105	-106.7625	-133.417	1403.653	-1.6187	2.0298	-1.3442	-57.888	-260.868	1391.306	NaN	NaN	NaN
3.912	-89.018	201.8638	724.044	-0.90357	0.87037	-0.40974	-99.6666	-199.529	1362.345	-2.1099	1.436	-1.1358	-29.671	-145.094	1373.36	-1.1216	1.8994	-1.2968	-135.409	-220.51	1426.239	NaN	NaN	NaN
3.914	-76.116	208.9348	709.1151	-0.90381	0.87354	-0.40381	-94.9564	-146.52	1337.6831	-1.8667	1.4946	-1.1421	-4.579	-185.37	1362.695	-0.74658	1.7017	-1.231	-139.747	-167.67	1457.3867	NaN	NaN	NaN
3.916	-64.689	210.352	700.3691	-0.89579	0.87305	-0.41211	-88.717	-196.791	1325.245	-1.5332	1.4473	-1.0957	3.381	-174.153	1337.99	-0.56006	1.3813	-1.1206	-170.742	-194.74	1414.461	NaN	NaN	NaN
3.918	-52.246	213.731	701.6324	-0.89326	0.87303	-0.41338	-15.963	-259.448	1316.779	-1.4194	1.3853	-1.0679	-36.3159	-177.621	1426.895	-0.58301	1.2305	-1.084	-117.324	-246.839	1438.242	NaN	NaN	NaN
3.92	-85.919	205.9441	690.6235	-0.88504	0.87145	-0.41566	-43.898	-276.007	1304.42	-1.3516	1.248	-1.0234	-94.0346	-150.75	1513.035	-0.81348	1.0137	-1.0488	-98.814	-322.39	1488.962	NaN	NaN	NaN
3.922	-94.364	198.62062	686.413	-0.88559	0.86661	-0.41404	-68.1686	-296.917	1356.5555	-1.4372	1.1506	-1.0047	-94.7734	-131.24	1566.79	-1.0659	0.93799	-1.0454	-93.61	-343.25	1543.78	NaN	NaN	NaN
3.924	-80.372	183.2618	705.914	-0.88623	0.85889	-0.41699	-57.347	-197.403	1413.245	-1.5859	1.0596	-0.98633	-26.218	-151.16	1521.4355	-1.3369	0.9082	-1.0684	-88.888	-383.827	1580.6343	NaN	NaN	NaN
3.926	-100.234	187.867	706.59	-0.88879	0.84934	-0.4209	-110.1877	-140.19	1411.0116	-1.8218	0.95947	-0.97607	-10.217	-192.643	1487.419	-1.6479	0.96729	-1.1577	-66.136	-365.63	1617.293	NaN	NaN	NaN
3.928	-101.5367	186.321	716.747	-0.89487	0.82963	-0.42512	-62.7222	-176.38	1399.506	-1.9355	0.9082	-0.98828	-38.539	-236.476	1506.723	-1.7593	1.0278	-1.2163	-22.441	-343.306	1672.7152	NaN	NaN	NaN
3.93	-109.9274	196.4764	721.756	-0.9022	0.80502	-0.4403	-50.077	-223.62	1393.391	-2.1206	0.81494	-1.019	-51.8058	-272.86	1578.658	-1.894	1.1763	-1.3374	-31.04	-288.2	1742.0134	NaN	NaN	NaN
3.932	-94.6614	211.89	733.96	-0.91683	0.77089	-0.45272	-64.447	-319.904	1434.237	-2.252	0.77734	-1.0684	-39.074	-319.082	1628.885	-1.9458	1.2837	-1.4224	-17.234	-257.919	1792.386	NaN	NaN	NaN
3.934	-73.194	231.052	744.74	-0.94531	0.73242	-0.45898	-27.527	-352.409	1505.819	-2.2983	0.77783	-1.0923	27.557	-350.894	1653.864	-1.9707	1.3711	-1.4961	-105.0033	-242.343	1835.51	NaN	NaN	NaN
3.936	-85.549	233.037	751.27	-0.98139	0.69912	-0.45925	-61.1254	-363.618	1541.3356	-2.353	0.80322	-1.1455	102.1204	-389.009	1675.854	-1.9722	1.4438	-1.5601	-119.312	-199.5869	1895.462	NaN	NaN	NaN
3.938	-79.427	236.101	796.78	-1.0202	0.66993	-0.4644	-33.554	-414.049	1551.039	-2.3828	0.83887	-1.1856	103.609	-356.186	1695.7852	-1.9624	1.4595	-1.5757	-157.376	-120.015	1898.982	NaN	NaN	NaN
3.94	-77.36	234.691	859.92	-1.0686	0.65201	-0.47454	50.65	-406.249	1544.0977	-2.4063	0.88867	-1.2227	36.957	-321.838	1736.7432	-1.9473	1.459	-1.584	-104.334	-57.83	1895.771	NaN	NaN	NaN
3.942	-79.4302	234.65	911.45	-1.1151	0.63925	-0.4836	67.102	-416.455	1577.554	-2.4331	0.94385	-1.2476	-13.299	-226.194	1797.5948	-1.9499	1.4495	-1.572	-103.77	-53.862	1844.38831	NaN	NaN	NaN
3.944	-130.921	229.538	958.75	-1.1577	0.63232	-0.49365	92.4592	-408.596	1668.932	-2.4448	0.96533	-1.2632	-39.669	-196.944	1832.069	-1.9668	1.4355	-1.5605	-85.984	-78.153	1804.1558	NaN	NaN	NaN
3.946	-116.289	222.778	999.21	-1.1934	0.62589	-0.51218	50.462	-342.39	1747.7705	-2.48	1.02	-1.2769	-54.4043	-140.475	1850.169	-2.0313	1.4355	-1.5625	-105.672	-131.26	1782.56	NaN	NaN	NaN
3.948	-121.668	213.912	1047.75	-1.2328	0.61174	-0.54157	-29.148	-312.422	1825.863	-2.5164	1.0666	-1.2947	-69.115	-147.557	1851.7175	-2.0737	1.4458	-1.5649	-102.3141	-136.936	1793.588	NaN	NaN	NaN
3.95	-148.709	210.744	1086.98	-1.2672	0.59922	-0.57204	-17.686	-230.839	1838.913	-2.5581	1.1235	-1.3179	-70.514	-65.367	1813.712	-2.166	1.5078	-1.5996	-54.566	-123.88	1827.0021	NaN	NaN	NaN
3.952	-158.451	182.583	1110.22	-1.321	0.58682	-0.61063	-68.4492	-175.786	1808.2771	-2.6016	1.1953	-1.3535	-68.632	-61.422	1802.107	-2.2195	1.5774	-1.6375	-59.344	-109.236	1840.5435	NaN	NaN	NaN
3.954	-138.666	138.09	1155.46	-1.3765	0.5708	-0.64404	-50.744	-167.244	1812.0854	-2.6152	1.2363	-1.375	-98.5783	-8.637	1774.53927	-2.2397	1.6528	-1.6655	-54.942	-92.99	1833.3863	NaN	NaN	NaN
3.956	-122.365	87.948	1201.19	-1.4332	0.55605	-0.66212	-12.954	-113.035	1806.0459	-2.6147	1.3169	-1.4067	-92.2184	-52.0025	1803.548	-2.2148	1.75	-1.6914	-111.9286	-83.384	1794.1	NaN	NaN	NaN
3.958	-140.756	53.652	1214.86	-1.5016	0.55371	-0.67578	-74.983	-125.436	1813.1125	-2.6032	1.3777	-1.4275	-79.58	-38.597	1793.316	-2.1758	1.7832	-1.6895	-108.781	-57.318	1772.318	NaN	NaN	NaN
3.96	-112.462	-4.18000000000001	1238.76	-1.561	0.56778	-0.67812	-54.2254	-110.046	1823.9353	-2.582	1.4492	-1.4395	-60.4759	-98.81	1819.007	-2.064	1.811	-1.6743	-165.297	-30.71478	1774.509	NaN	NaN	NaN
3.962	-96.5717	-22.82	1226.43	-1.6055	0.60841	-0.67481	-57.575	-108.956	1817.649	-2.5449	1.4863	-1.4785	-72.886	-51.338	1837.992	-1.9766	1.7754	-1.6465	-124.4272	2.178	1780.013	NaN	NaN	NaN
3.964	-106.8352	-38.141	1233.22	-1.623	0.66602	-0.66406	-54.065	-174.351	1846.957	-2.5151	1.4927	-1.4722	-84.19	-58.891	1845.7253	-1.8901	1.7095	-1.5874	-115.298	-4.96	1753.701	NaN	NaN	NaN
3.966	-133.467	-43.274	1222.92	-1.6156	0.7332	-0.67227	-14.806	-176.962	1844.381	-2.437	1.4829	-1.4253	-118.812	18.699	1813.292	-1.8081	1.5806	-1.5073	-72.8831	10.998	1682.1317	NaN	NaN	NaN
3.968	-103.6226	-55.953	1209.55	-1.5633	0.81054	-0.67207	-47.365	-169.837	1826.713	-2.3701	1.4394	-1.3789	-138.538	-11.0618	1783.064	-1.7749	1.5142	-1.4702	-57.893	0.369	1587.433	NaN	NaN	NaN
3.97	-106.6964	-71.544	1200.45	-1.4774	0.87851	-0.67363	-59.767	-155.458	1848.444	-2.3027	1.3848	-1.3281	-161.724	14.36221	1755.321	-1.7207	1.416	-1.4121	-61.03	48.9854	1541.778	NaN	NaN	NaN
3.972	-106.5952	-66.124	1163.19	-1.3587	0.93056	-0.68174	-75.515	-126.02739	1870.905	-2.207	1.3184	-1.2793	-149.145	-41.417	1770.058	-1.6731	1.3835	-1.3924	-51.249	92.7266	1504.511	NaN	NaN	NaN
3.974	-121.3316	-66.667	1134.32	-1.2163	0.95361	-0.68701	-151.115	-161.557	1888.12	-2.1636	1.2954	-1.2554	-93.915	8.638	1750.0645	-1.6211	1.3652	-1.3809	-59.198	119.7156	1504.717	NaN	NaN	NaN
3.976	-99.677	-59.282	1096.56	-1.0674	0.94961	-0.70332	-103.955	-168.3793	1879.197	-2.0933	1.2427	-1.2163	-72.885	13.9557	1696.5445	-1.5332	1.3555	-1.3691	-21.581	144.729	1494.208	NaN	NaN	NaN
3.978	-84.928	-36.589	1072.94	-0.92988	0.91523	-0.71904	-94.2447	-142.8875	1834.453	-2.0572	1.2173	-1.185	-53.002	92.7569	1589.182	-1.4858	1.3511	-1.3608	-55.0093	130.243	1464.947	NaN	NaN	NaN
3.98	-64.919	-16.292	1038.82	-0.79472	0.85273	-0.74326	-84.75	-113.901	1775.9895	-2.0308	1.1958	-1.1616	-56.512	54.3697	1543.982	-1.3984	1.3418	-1.3438	-37.157	156.151	1439.858	NaN	NaN	NaN
3.982	-58.461	-5.723	998.05	-0.68438	0.78496	-0.7586	-41.071	-64.13859	1699.107	-2.0156	1.1895	-1.1426	-34.821	101.97031	1522.32	-1.3423	1.3364	-1.3222	-48.984	168.144	1407.2535	NaN	NaN	NaN
3.984	-47.28	-17.297	999	-0.58154	0.70557	-0.76904	-77.173	-42.1483	1630.138	-2.0059	1.1934	-1.1406	-18.24	95.514	1552.3754	-1.2969	1.3164	-1.3008	-51.713	210.832	1408.936	NaN	NaN	NaN
3.986	-26.375	-15.277	982.78	-0.50195	0.63564	-0.77842	-54.342	-50.021	1630.3387	-1.978	1.2036	-1.1206	32.095	170.956	1514.823	-1.2539	1.2734	-1.2773	-81.67498	211.469	1388.437	NaN	NaN	NaN
3.988	-23.699	-31.995	983.6	-0.43623	0.57275	-0.78447	-15.153	-31.6354	1632.7416	-1.9336	1.1982	-1.1132	41.897	150.9	1487.978	-1.23	1.2524	-1.2632	-49.617	206.214	1341.4277	NaN	NaN	NaN
3.99	-30.391	-53.913	946.75	-0.39326	0.53369	-0.79619	-19.532	-47.232	1609.968	-1.877	1.1943	-1.1006	-8.536	180.963	1441.6736	-1.2197	1.1875	-1.2227	-28.972	183.592	1283.876	NaN	NaN	NaN
3.992	-27.309	-83.862	926.43	-0.36514	0.50967	-0.80654	17.052	-11.8725	1562.4816	-1.793	1.1641	-1.0742	-49.3277	150.23	1428.027	-1.2193	1.143	-1.1899	-17.852	182.78	1256.7272	NaN	NaN	NaN
3.994	-20.626	-100.168	897.74	-0.34326	0.50732	-0.82031	-36.645	39.5642	1473.424	-1.7461	1.1484	-1.0625	-34.933	194.736	1380.9975	-1.2202	1.1001	-1.1597	1.344	196.493	1221.186	NaN	NaN	NaN
3.996	-28.653	-111.4	879.77	-0.32539	0.51563	-0.82949	-58.961	43.0448	1438.341	-1.6597	1.104	-1.0229	-16.72	187.888	1345.6808	-1.209	1.043	-1.1191	-25.985	194.131	1195.786	NaN	NaN	NaN
[truncated: 28,002 more rows]
