# Supplementary material for: Reliability and Validity of Running Cadence and Stance Time Derived from Instrumented Wireless Earbuds
Source: Sensors (Basel). 2021 Nov 30;21(23):7995. doi: 10.3390/s21237995 (PMC8659722; doi:10.3390/s21237995)
Supplement: Supplementary file 1 [file sensors-21-07995-s001.zip › Data_P13_HeadMovements.csv]

time	up_force_plate_1	up_force_plate_2	up_force_plate_3	up_earbuds_1	up_earbuds_2	up_earbuds_3	down_force_plate_1	down_force_plate_2	down_force_plate_3	down_earbuds_1	down_earbuds_2	down_earbuds_3	shake_force_plate_1	shake_force_plate_2	shake_force_plate_3	shake_earbuds_1	shake_earbuds_2	shake_earbuds_3	nod_force_plate_1	nod_force_plate_2	nod_force_plate_3	nod_earbuds_1	nod_earbuds_2	nod_earbuds_3	bird_L_force_plate_1	bird_L_force_plate_2	bird_L_force_plate_3	bird_L_earbuds_1	bird_L_earbuds_2	bird_L_earbuds_3	bird_R_force_plate_1	bird_R_force_plate_2	bird_R_force_plate_3	bird_R_earbuds_1	bird_R_earbuds_2	bird_R_earbuds_3	check_watch_force_plate_1	check_watch_force_plate_2	check_watch_force_plate_3	check_watch_earbuds_1	check_watch_earbuds_2	check_watch_earbuds_3
0	-55.848	2.311	19.8735	0.0053711	-0.095947	-0.10962	-58.338	119.34	380.7367	-0.20527	0.13389	-0.14228	78.49	-21.528	1597.464	-1.9194	1.4839	-0.58643	-50.3008	160.936	1196.8666	-1.1987	0.75439	-0.30957	-32.882	-17.868	85.463	-0.17725	0.22461	0.074219	-65.36	171.0094	1000.595	-0.95386	0.6106	-0.1709	65.223	1.198	1548.015	-1.7629	0.94649	-0.62597
0.002	-72.04138	38.4274	37.7092	0.0048828	-0.09375	-0.11768	-12.586	101.824	364.0777	-0.17236	0.11426	-0.13994	56.784	-56.746	1599.1341	-1.8667	1.3794	-0.56689	-7.822	158.27593	1165.9594	-1.1812	0.73682	-0.30029	-67.92434	-17.922	102.1851	-0.2018	0.2473	0.064406	-49.942	201.0836	973.7305	-0.92578	0.58789	-0.16797	60.476	49.168	1529.6231	-1.7398	0.92734	-0.62324
0.004	-78.424	80.91	18.821	0.003418	-0.091309	-0.12695	-48.4295	152.6496	312.229	-0.14258	0.094238	-0.14063	101.975	-28.45	1620.956	-1.8374	1.3179	-0.5503	43.656	175.216	1137.5581	-1.1421	0.69971	-0.2793	-27.398	-69.48954	168.461	-0.22906	0.26717	0.056332	-87.512	185.5605	951.114	-0.88086	0.55273	-0.16797	12.4437	89.644	1502.4818	-1.7098	0.91875	-0.61836
0.006	-101.051	11.7892	38.5669	0.0019531	-0.087402	-0.13574	-85.218	139.2172	291.3139	-0.11553	0.073535	-0.13808	89.772	7.902	1598.908	-1.8145	1.2734	-0.53955	10.139	149.2784	1111.5452	-1.1091	0.67554	-0.26245	-107.769	-34.556	200.506	-0.26409	0.28447	0.047331	-95.119	183.3938	951.238	-0.85693	0.54053	-0.16797	2.812	72.69	1517.178	-1.6758	0.92188	-0.61523
0.008	-89.388	67.024	39.2161	-0.0014648	-0.084961	-0.14355	-46.91269	136.742	266.6458	-0.090722	0.055371	-0.13379	93.329	-49.1765	1600.634	-1.7886	1.2329	-0.52881	75.2372	155.483	1075.8941	-1.0762	0.65137	-0.24951	-126.3983	-64.4198	252.872	-0.31278	0.29413	0.03253	-76.133	226.571	916.96931	-0.80566	0.50977	-0.16797	-49.8206	122.197	1482.5906	-1.6336	0.93438	-0.61094
0.01	-88.216	24.4181	14.782	-0.0043946	-0.080566	-0.14844	-117.49	116.9415	237.2515	-0.068457	0.039356	-0.13223	160.69	-24.9932	1611.27	-1.7734	1.2266	-0.52344	39.982	172.154	1019.5276	-1.0234	0.61426	-0.2334	-91.822	-32.6177	377.253	-0.36865	0.31201	0.01123	-52.4155	213.076	889.6973	-0.76758	0.48999	-0.16651	-60.488	103.8183	1457.923	-1.5972	0.95274	-0.59297
0.012	-77.566	-15.4016	25.1138	-0.0078125	-0.075684	-0.15137	-91.486	68.372	240.2282	-0.047754	0.021485	-0.13213	132.77	-45.165	1586.6665	-1.7456	1.2153	-0.52051	36.593	157.5884	980.663	-0.99414	0.59961	-0.22266	-144.4717	58.5209	518.794	-0.43465	0.32311	-0.015601	-3.3788	217.795	857.9711	-0.72461	0.46387	-0.16748	-62.893	106.802	1458.323	-1.5566	0.97461	-0.58516
0.014	-45.6026	44.3463	16.182	-0.019531	-0.067383	-0.15527	-81.04	86.1932	207.785	-0.033691	0.0063477	-0.12939	103.971	-76.329	1598.223	-1.7185	1.217	-0.51879	77.3215	162.788	964.538	-0.93457	0.56494	-0.2041	-123.527	31.329	683.556	-0.51051	0.33966	-0.039508	-12.8012	193.746	814.9413	-0.66211	0.43164	-0.17188	-83.456	145.862	1412.1283	-1.5252	0.99393	-0.56953
0.016	-73.945	-3.0875	17.9994	-0.026367	-0.05957	-0.1582	-106.277	94.857	186.4755	-0.017773	-0.0081054	-0.12431	111.89	-12.9585	1573.697	-1.6836	1.2168	-0.51416	11.148	169.1356	909.6035	-0.87256	0.52295	-0.18701	-131.5053	20.0724	758.25	-0.60522	0.36543	-0.062252	-7.443	150.832	786.228	-0.63232	0.4165	-0.16797	-77.305	102.6881	1406.508	-1.5015	1.0083	-0.55225
0.018	-46.885	30.9108	30.0091	-0.043457	-0.041504	-0.17041	-44.7108	78.842	164.1643	-0.0060547	-0.025781	-0.13018	65.584	-23.3806	1532.4891	-1.6401	1.2192	-0.50928	7.452	147.071	892.1569	-0.84326	0.51123	-0.16699	-122.167	-28.5541	822.245	-0.71656	0.40119	-0.076115	76.889	177.951332	751.943	-0.57324	0.38184	-0.16406	-104.4	123.3041	1384.2642	-1.4761	1.0143	-0.53213
0.02	-29.002	56.527	24.50554	-0.058838	-0.027588	-0.18311	-75.8926	121.3263	115.601	0.0037109	-0.035547	-0.12744	62.901	33.1583	1529.1919	-1.6172	1.2148	-0.50391	22.209	175.4697	878.623	-0.7749	0.46826	-0.15918	-101.8285	-114.285	935.4359	-0.86865	0.44971	-0.089355	57.178	181.3206	718.348	-0.52662	0.354	-0.16651	-101.597	110.732	1343.684	-1.4487	1.0161	-0.51621
0.022	-5.014	-17.5428	72.679	-0.078125	-0.010742	-0.19043	-64.1863	84.892	109.6819	0.0098632	-0.045215	-0.12334	71.801	104.614	1503.863	-1.5762	1.2041	-0.48828	-49.826	171.21193	867.6946	-0.72656	0.43896	-0.14502	-113.471	-68.643	1010.913	-1.0504	0.5224	-0.10556	66.542	152.671	703.146	-0.48145	0.3252	-0.16016	-91.578	58.011	1345.06693	-1.4206	1.0153	-0.49551
0.024	19.451	13.8449	97.252	-0.11182	0.010742	-0.19775	-9.526	80.3989	101.779	0.015625	-0.056641	-0.12012	27.0161	80.041	1512.53225	-1.545	1.1894	-0.47656	-29.866	169.212	852.98	-0.6709	0.40723	-0.13574	-89.2067	-79.921	1062.453	-1.2555	0.61129	-0.1111	100.348	157.6052	654.34264	-0.42383	0.28857	-0.16162	-94.139	98.486	1314.7689	-1.3904	1.0061	-0.47695
0.026	8.803	-27.329	91.411	-0.1333	0.026855	-0.19971	-24.1373	100.684	100.81105	0.018164	-0.064453	-0.11944	14.29479	129.085	1513.8444	-1.5215	1.168	-0.46094	-57.582	193.672	809.689	-0.60352	0.36963	-0.11621	-55.264	-88.471	1029.188	-1.4726	0.71804	-0.10359	52.5969	150.1079	619.5097	-0.39795	0.2749	-0.15723	-81.821	88.446	1302.89512	-1.353	0.98682	-0.46631
0.028	29.996	-46.1005	116.4736	-0.20117	0.046875	-0.21338	29.2247	45.9171	104.325	0.022363	-0.072754	-0.11953	-43.497	125.537	1476.0457	-1.4956	1.1372	-0.43701	-83.3963	166.2794	769.464	-0.56543	0.34912	-0.11328	-63.635	-89.5339	987.772	-1.6905	0.8347	-0.096778	86.508	171.718	594.9082	-0.34131	0.23975	-0.16113	-44.583	106.812	1305.1174	-1.3165	0.9749	-0.44522
0.03	61.3276	27.7196	126.704	-0.26221	0.065674	-0.22754	44.0619	62.883	78.68	0.02627	-0.077441	-0.11485	-65.708	103.8136	1464.579	-1.48	1.1235	-0.42139	-61.728	160.936	738.286	-0.49756	0.30762	-0.096191	17.369	-148.035	997.6327	-1.8828	0.95898	-0.104	88.642	179.165	557.732	-0.30273	0.21435	-0.15625	-54.4475	159.2392	1273.8463	-1.2832	0.94922	-0.43379
0.032	41.9606	-23.167	207.2053	-0.33496	0.093262	-0.23975	14.813	69.4433	54.0051	0.023828	-0.084082	-0.11142	-33.96143	151.645	1415.8654	-1.4434	1.0957	-0.40332	-137.297	168.768	682.247	-0.44556	0.27686	-0.083984	53.2347	-104.1055	1025.7327	-2.037	1.0871	-0.11413	52.92	151.833	529.389	-0.26855	0.18799	-0.15771	-15.683	130.1537	1252.3993	-1.2473	0.92578	-0.41816
0.034	48.2501	-4.412	302.9047	-0.45654	0.12646	-0.26123	52.1363	46.9671	60.306	0.022461	-0.086426	-0.11182	-75.946	117.5172	1382.634	-1.4065	1.0713	-0.38745	-122.631	139.996	649.0893	-0.39746	0.24707	-0.067383	77.153	-108.939	1030.5443	-2.1443	1.2066	-0.11944	86.169	150.585	485.048	-0.21924	0.15479	-0.15674	5.31	165.666	1243.14	-1.2155	0.90215	-0.40098
0.036	64.631	30.583	375.753	-0.53271	0.15039	-0.27051	40.054	90.224	29.772	0.017382	-0.091113	-0.10996	-63.0921	116.4742	1367.19263	-1.3691	1.0508	-0.37354	-118.04	160.601	611.1	-0.3418	0.2168	-0.040527	105.151	-190.029	1047.827	-2.1959	1.3127	-0.12128	65.122	140.3982	437.367	-0.19629	0.14063	-0.1543	-8.232	176.3938	1202.413	-1.1807	0.87695	-0.38672
0.038	85.45	-14.2088	490.691	-0.70361	0.21338	-0.29346	38.53	69.691	31.35456	0.012402	-0.091211	-0.10723	-69.053	118.9781	1324.334	-1.3101	1.0229	-0.35303	-137.56	142.179	566.8733	-0.31445	0.19922	-0.029785	73.294	-172.563	1005.381	-2.183	1.3911	-0.11549	49.6978	124.314	414.7209	-0.15771	0.10889	-0.1543	52.246	138.0472	1193.219	-1.1582	0.85703	-0.37305
0.04	92.7	55.1956	619.085	-0.85572	0.27319	-0.30347	100.707	64.989	45.779	0.0057616	-0.09082	-0.10176	-107.855	76.303	1320.3629	-1.2773	1.0039	-0.33594	-110.218	117.238	540.3182	-0.25977	0.16748	-0.012695	97.473	-169.429	995.56	-2.1226	1.4341	-0.11084	66.182	131.512	385.2904	-0.12988	0.083741	-0.15332	49.79	197.864	1133.542	-1.1324	0.83398	-0.35537
0.042	58.494	43.135	741.4269	-1.0244	0.34717	-0.30957	55.504	80.394	24.8582	-0.00078124	-0.091211	-0.10567	-90.602	97.875	1305.8099	-1.2031	0.95801	-0.32227	-121.342	173.544	469.118	-0.22583	0.14014	-0.0004883	158.911	-75.697	983.968	-2.0171	1.4259	-0.11207	13.834	121.188	352.7171	-0.10059	0.060547	-0.15527	45.1378	156.2923	1092.801	-1.1148	0.81329	-0.33896
0.044	36.9385	11.0023	860.215	-1.2754	0.48145	-0.29785	60.2432	36.7493	52.139	-0.0048828	-0.091309	-0.099609	-137.443	97.07	1274.6189	-1.1462	0.92261	-0.30615	-135.576	176.024	443.965	-0.18994	0.11816	0.010742	83.217	17.11	980.854	-1.885	1.3815	-0.1111	3.05	119.944	311.3056	-0.070313	0.032227	-0.1543	69.8196	152.5148	1077.5478	-1.0919	0.79366	-0.32471
0.046	36.4472	47.732	922.066	-1.4082	0.5625	-0.28711	29.542	49.282	32.6221	-0.012793	-0.090527	-0.093945	-111.7718	92.245	1252.263	-1.0913	0.87939	-0.28857	-96.5216	180.205	438.976	-0.1416	0.08252	0.022949	69.2179	-24.31	1005.7774	-1.7439	1.305	-0.10013	-31.9402	135.411	280.295	-0.056641	0.019531	-0.15625	48.957	184.3952	1026.483	-1.0723	0.76855	-0.30908
0.048	-14.37	-35.503	995.286	-1.687	0.74707	-0.24756	-11.279	60.3668	24.3384	-0.01914	-0.091211	-0.086621	-60.011	142.115	1203.1204	-1.021	0.82666	-0.26807	-129.087	208.01	424.491	-0.11768	0.068848	0.030762	19.964	-50.211	982.624	-1.6171	1.2085	-0.084768	-53.831	115.77026	262.289	-0.032227	-0.0092773	-0.15869	36.759	139.872	1016.1292	-1.0496	0.74531	-0.29648
0.05	-55.732	-51.96	1102.228	-1.9028	0.91162	-0.219	34.129	28.557	38.002	-0.027344	-0.090039	-0.076465	-93.1405	137.2813	1167.939809	-0.9917	0.80225	-0.26367	-81.9977	155.913	413.3613	-0.078613	0.043457	0.038086	-33.696	-136.557	982.271	-1.5176	1.1191	-0.056152	-20.807	108.8796	245.381	-0.020508	-0.023193	-0.15357	19.74	177.497	998.9454	-1.0219	0.7211	-0.28125
0.052	-95.876	-32.617	1152.556	-2.1089	1.0796	-0.20654	-21.027	67.727	25.962	-0.036133	-0.087695	-0.067871	-36.013	149.0362	1169.539	-0.94189	0.75537	-0.2417	-38.602	173.8408	377.5227	-0.050782	0.025147	0.050048	27.779	-217.66	1025.284	-1.4517	1.0646	-0.028426	-70.266	107.8536	215.776	-0.011719	-0.041016	-0.15186	12.742	184.689	972.5407	-0.99414	0.69102	-0.26914
0.054	-126.15	-101.928	1177.375	-2.3296	1.3364	-0.20605	-45.5235	42.975	35.7689	-0.040039	-0.091309	-0.05957	-11.288	188.843	1133.6305	-0.90381	0.72265	-0.22778	-52.137	184.8381	342.7252	-0.033203	0.0029297	0.058105	44.028	-230.922	1037.8666	-1.3981	1.0261	-0.0060293	-66.855	94.314	199.83917	-0.0029297	-0.056641	-0.15234	-11.214	160.9212	952.6102	-0.96387	0.66309	-0.25645
0.056	-161.1216	-90.915	1166.08	-2.396	1.4614	-0.20068	-30.905	19.7549	45.7299	-0.044922	-0.093848	-0.050488	-14.01	178.3344	1110.7096	-0.87939	0.69775	-0.21143	21.735	147.787	332.131	-0.010254	-0.017578	0.0625	29.208	-271.407	1036.829	-1.3532	1.0007	-0.0017502	-53.759	103.2129	186.9943	0.003418	-0.069336	-0.15332	-22.929	223.735	915.1561	-0.9292	0.63135	-0.24121
0.058	-208.4591	-145.172	1136.395	-2.4448	1.7075	-0.18457	-92.529	55.9461	36.2287	-0.051074	-0.094433	-0.046191	50.786	197.93	1095.3133	-0.84131	0.66357	-0.19189	19.439	189.219	286.71219	-0.0063477	-0.024414	0.067871	39.394	-259.3394	1020.41533	-1.2926	0.98112	0.0044008	-100.031	94.1089	175.5681	0.0078125	-0.083496	-0.15137	-43.736	187.7743	885.30937	-0.89199	0.60351	-0.22656
0.06	-229.3209	-192.042	1150.051	-2.3999	1.8218	-0.1975	-66.6995	10.698	52.996	-0.053027	-0.097559	-0.042285	27.637	199.009	1036.4677	-0.82178	0.64697	-0.18359	24.257	154.993	259.4973	-0.00097656	-0.036621	0.080078	-17.2693	-246.507	1040.555	-1.2222	0.96826	0.011719	-66.0194	90.5355	159.3532	0.0073242	-0.093262	-0.15259	-64.535	188.219	885.561	-0.85069	0.56435	-0.21025
0.062	-195.242	-123.588	1111.81483	-2.2944	1.8462	-0.23389	-91.683	23.381	32.2638	-0.051074	-0.10185	-0.036035	51.757	159.766	981.9672	-0.78857	0.61182	-0.16357	90.823	117.7	260.7248	-0.00073245	-0.043701	0.088379	2.869	-295.4	1119.915	-1.1528	0.96445	0.017867	-60.8168	102.53222	125.76	0.010742	-0.096191	-0.14795	-82.9022	221.6207	830.6967	-0.80928	0.53623	-0.20557
0.064	-167.5597	-130.332	1064.733	-2.0542	1.7153	-0.32275	-119.297	21.748	39.813	-0.047363	-0.10742	-0.033203	53.105	168.606	938.0072	-0.74951	0.58838	-0.14966	45.2434	128.9373	239.502	-0.0058594	-0.04248	0.09082	-21.484	-271.275	1185.664	-1.0883	0.96095	0.027542	-61.4342	86.641	96.856	0.0097656	-0.10352	-0.14795	-82.8453	174.045	806.109	-0.76524	0.50078	-0.18838
0.066	-183.019	-107.26236	1081.703	-1.9019	1.5903	-0.37012	-83.7767	-11.3944	49.229	-0.041504	-0.11084	-0.024317	0.564	154.1332	898.1734	-0.7168	0.57324	-0.12744	65.6226	64.239	258.056	-0.015137	-0.040527	0.099121	-90.835	-247.317	1250.229	-1.0329	0.95313	0.023637	-14.672	80.138	89.143	0.0039063	-0.104	-0.14453	-91.5766	208.70133	763.6795	-0.72217	0.46729	-0.17432
0.068	-175.368	-52.626	1090.3756	-1.582	1.2695	-0.44824	-107.93	45.531	31.2937	-0.038086	-0.11036	-0.034179	34.131	135.973	876.2061	-0.66455	0.53564	-0.11084	74.1213	102.3222	233.2369	-0.022949	-0.040527	0.10205	-86.4908	-230.032	1298.291	-0.98137	0.94561	0.021779	-60.375	69.994	81.565	0.0039063	-0.10791	-0.14209	-129.405	209.5685	695.639	-0.67705	0.43349	-0.16084
0.07	-158.092	-61.545	1081.4143	-1.3823	1.0356	-0.48584	-86.788	26.7366	49.221	-0.028321	-0.11738	-0.031836	10.941	152.4803	865.9763	-0.63672	0.51855	-0.099609	38.757	134.4534	201.526	-0.03125	-0.029785	0.11719	-143.926	-150.236	1276.2051	-0.94287	0.92432	0.01123	-24.461	74.067	86.9109	0.0024414	-0.10352	-0.14184	-134.848	171.63	675.3186	-0.63398	0.39717	-0.1502
0.072	-147.156	-4.563	1069.8122	-1.2305	0.8457	-0.50098	-58.5887	7.1746	47.0618	-0.023243	-0.12061	-0.038672	-27.099	146.602	831.732	-0.57959	0.48486	-0.083008	70.107	108.707	186.89	-0.03711	-0.011475	0.11939	-174.998	-131.47	1274.1029	-0.9081	0.89267	-0.0044961	21.2958	86.016	84.4613	0.0019531	-0.10547	-0.13867	-158.429	225.4191	625.15	-0.59258	0.36436	-0.13613
0.074	-160.602	-19.146	1049.939	-1.1108	0.68604	-0.49951	-124.791	41.5491	16.937	-0.01709	-0.12549	-0.039063	13.758	157.0164	817.3768	-0.53711	0.46021	-0.069092	18.401	151.811	143.12227	-0.042969	0.0039063	0.12695	-116.769	-123.641	1287.5873	-0.88554	0.85409	-0.038484	10.096	87.255	70.5975	0.0039063	-0.098633	-0.1377	-156.577	188.298	581.818	-0.54854	0.33594	-0.12334
0.076	-159.891	-87.739	1059.0586	-1.0811	0.64258	-0.51025	-63.0221	-4.157	41.2311	-0.0064454	-0.12666	-0.040723	-12.89	190.19	778.7398	-0.49316	0.43359	-0.058105	8.816	113.01858	139.892	-0.052734	0.027344	0.13037	-99.9829	-107.572	1299.981	-0.87148	0.82284	-0.066609	66.774	74.661	66.9424	0.00097656	-0.09375	-0.13379	-132.639	197.53303	583.5943	-0.49951	0.30469	-0.10791
0.078	-135.7364	-87.451	1045.316	-1.0332	0.61035	-0.51465	-24.136	3.4181	32.5744	-0.0023438	-0.13213	-0.046289	-42.635	171.3328	741.883	-0.43066	0.39258	-0.04248	22.124	84.4846	148.911	-0.056641	0.036133	0.13477	-57.7514	-138.691	1362.5463	-0.87207	0.78769	-0.1084	53.453	80.777	34.097	0	-0.084473	-0.13379	-130.506	246.403	544.727	-0.46006	0.2791	-0.092285
0.08	-102.17332	-165.935	1016.658	-0.99488	0.61011	-0.51026	-54.2029	20.2285	31.659	0.003125	-0.13252	-0.047461	-24.406	185.408	702.11	-0.39551	0.37646	-0.035156	-38.898	129.239	121.1112	-0.059082	0.056641	0.13965	-71.917	-102.354	1400.711	-0.88672	0.76172	-0.1416	12.001	80.386	32.8378	-0.001709	-0.082275	-0.12695	-100.848	204.9562	538.18042	-0.42285	0.24824	-0.076856
0.082	-26.842	-225.621	1078.296	-0.94873	0.61963	-0.49756	12.448	-15.5143	51.381	0.0030274	-0.13242	-0.054687	-74.7689	175.4699	638.388	-0.32715	0.33203	-0.022461	-38.3624	79.8295	131.051	-0.064453	0.070069	0.14185	-88.964	-100.5205	1410.456	-0.92988	0.7541	-0.14844	80.636	64.531	48.3163	-0.0029297	-0.075195	-0.12354	-61.5655	261.998	512.1662	-0.38691	0.22402	-0.063184
0.084	-27.409	-216.337	1116.736	-0.89111	0.61377	-0.48779	-6.949	39.296	4.1799	0.0014648	-0.13623	-0.054199	-60.119	146.925	615.543	-0.27539	0.30322	-0.014404	-40.981	98.919	101.103	-0.063965	0.083008	0.14746	-5.109	-130.346	1439.235	-0.99805	0.76093	-0.14795	63.1432	50.129	37.2078	-0.0058594	-0.067871	-0.11475	-59.991	255.863	478.9863	-0.35381	0.19678	-0.05332
0.086	-31.2202	-283.867	1136.6845	-0.85938	0.60693	-0.48438	6.992	12.38404	17.3117	0.00029295	-0.1375	-0.058496	-81.3318	170.383	564.386	-0.22559	0.27344	-0.0014648	-103.665	98.52186	76.8415	-0.061523	0.088379	0.14453	-0.985999999999997	-123.124	1433.246	-1.0797	0.77539	-0.15811	59.2491	25.6518	36.1022	-0.0083008	-0.064453	-0.11084	-45.466	195.3447	470.3965	-0.32666	0.17188	-0.034668
0.088	29.37	-254.484	1177.047	-0.80615	0.57275	-0.49756	63.7289	-7.385	17.3507	0.0012696	-0.1417	-0.062988	-123.363	165.605	515.8475	-0.16992	0.23438	0.012695	-88.4671	47.8448	63.468	-0.057129	0.088379	0.14551	-17.045	-162.668	1457.677	-1.1652	0.80664	-0.16777	70.8657	21.3242	38.79344	-0.0063477	-0.060059	-0.10303	-1.161	230.913	443.7104	-0.30303	0.15029	-0.017481
0.09	41.6097	-231.727	1210.207	-0.77564	0.54419	-0.49756	10.732	27.2385	12.534	0.0047851	-0.14834	-0.077832	-97.8093	170.42	475.307	-0.14014	0.21582	0.0083008	-115.565	82.473	32.743	-0.047852	0.087402	0.14209	21.665	-164.635	1502.283	-1.2612	0.83838	-0.18066	28.374	42.1806	24.0713	-0.0046387	-0.051269	-0.098878	-7.016	161.8646	411.6142	-0.28838	0.12705	-0.0025391
0.092	63.3173	-261.922	1283.376	-0.75391	0.51172	-0.49609	67.9849	-25.409	33.94442	0.012207	-0.14697	-0.073047	-132.379	200.361	421.3	-0.096191	0.18066	0.020996	-97.455	42.423	35.0912	-0.037841	0.085937	0.1372	-19.796	-134.5877	1510.845	-1.3747	0.87373	-0.22246	42.1949	38.349	49.183	0.00097656	-0.045898	-0.090332	18.712	156.85147	401.3813	-0.27432	0.11142	0.0033203
0.094	82.0026	-215.357	1331.063	-0.76416	0.47803	-0.48389	65.7798	-2.63733	11.496	0.018555	-0.1499	-0.084961	-123.2	176.1049	413.336	-0.068848	0.15357	0.027588	-69.3804	11.0295	54.6535	-0.024902	0.077637	0.13525	15.117	-154.844	1573.65	-1.493	0.91836	-0.24883	4.376	37.3347	45.665	0.0073242	-0.042969	-0.083496	39.6382	173.115	363.9321	-0.26035	0.093262	0.013281
0.096	49.3206	-213.7581	1342.997	-0.79102	0.4751	-0.46582	35.4474	17.4242	16.82102	0.027539	-0.14629	-0.095508	-121.14	182.3	375.045	-0.047363	0.12988	0.038574	-140.087	54.4777	42.093	-0.0087891	0.068848	0.13135	54.5973	-116.661	1596.886	-1.6418	0.9836	-0.25273	-39.0053	27.7305	40.1552	0.0087891	-0.038086	-0.079102	36.187	124.1697	356.772	-0.24951	0.07959	0.024902
0.098	51.5943	-202.3646	1367.401	-0.89063	0.50586	-0.42969	51.8394	-21.1603	32.8526	0.042285	-0.14737	-0.10674	-123.149	185.12	339.714	-0.016113	0.10498	0.04248	-81.8385	-16.875	52.6188	-0.0068359	0.05957	0.12646	35.987	-121.284	1573.149	-1.8315	1.0873	-0.23555	4.821	2.86785	45.5534	0.016113	-0.035156	-0.065918	38.172	169.811	330.006	-0.24199	0.071094	0.033789
0.1	49.51061	-134.979	1382.4353	-1.0242	0.57544	-0.40966	20.063	31.2798	4.2744	0.051269	-0.15205	-0.11221	-67.7959	159.8761	324.054	-0.0078125	0.086914	0.042969	-85.804	15.896	47.85	0.0029297	0.049316	0.11865	63.1173	-134.04009	1554.3025	-2.0508	1.2324	-0.20459	-52.8755	10.1226	16.068	0.011963	-0.032715	-0.065674	57.3202	154.305	291.5326	-0.23526	0.063476	0.043554
0.102	25.466	-162.4953	1396.8537	-1.1772	0.67139	-0.39209	7.601	15.1074	3.6487	0.065039	-0.15655	-0.12031	-91.173	185.401	305.654	0.0092773	0.069336	0.050293	-108.624	32.895	30.26469	0.012207	0.036621	0.10937	29.482	-93.6487	1503.06	-2.2678	1.3983	-0.16601	-62.333	6.8357	43.166	0.0073242	-0.031738	-0.061523	47.002	112.5722	282.029	-0.22705	0.058789	0.053321
0.104	27.867	-135.803	1430.2734	-1.3867	0.84961	-0.35938	24.443	10.2034	1.566	0.07373	-0.16113	-0.12891	-76.7102	172.52	294.7142	0.019287	0.052001	0.05835	-55.4588	-3.2194	44.7158	0.018066	0.027832	0.10205	15.405	-101.332	1518.396	-2.4054	1.577	-0.081741	-46.543	8.0435	48.448	-0.00048828	-0.029785	-0.056641	38.118	161.79	263.2179	-0.22441	0.056445	0.059571
0.106	25.807	-136.51	1425.837	-1.4897	0.95361	-0.34619	-32.55	49.821	-6.717	0.076856	-0.16338	-0.13545	4.551	155.5561	297.7744	0.017578	0.040039	0.059082	-60.1963	51.697	16.8024	0.030762	0.0058594	0.098633	64.4592	-93.7409	1532.341	-2.5116	1.7075	-0.0063476	-92.78	29.6966	23.8713	-0.0024414	-0.028809	-0.053223	44.278	120.358	244.058	-0.22363	0.055176	0.066895
0.108	8.411	-169.02	1438.5261	-1.6836	1.1816	-0.33203	-27.461	-7.1589	33.318	0.080957	-0.16416	-0.1457	-11.032	181.532	257.3052	0.020508	0.026367	0.066406	-36.7885	20.0782	17.2716	0.03418	-0.0058594	0.09375	9.212	-72.735	1523.348	-2.832	1.8516	-0.12666	-45.8521	10.81	30.004	-0.003418	-0.023926	-0.046387	24.241	135.1213	229.386	-0.21933	0.065527	0.076465
0.11	-41.82	-134.088	1464.9109	-1.8005	1.3401	-0.34717	-41.502	19.4023	7.565	0.081738	-0.16963	-0.15234	18.166	140.6649	234.311	0.016113	0.020508	0.070313	25.065	-6.3629	27.6064	0.04541	-0.025391	0.086426	-8.512	-87.891	1517.8561	-2.9272	2.0337	-0.16943	-67.207	16.1093	15.36	-0.00708	-0.026856	-0.044921	23.464	158.77	190.09285	-0.21289	0.062109	0.077344
0.112	-69.062	-144.692	1487.0159	-1.8887	1.4746	-0.37354	-69.6805	38.833	8.2213	0.074414	-0.16406	-0.16093	34.991	126.676	223.9984	0.015137	0.012207	0.072266	3.005	33.2125	9.7639	0.056885	-0.04419	0.080078	-26.799	-40.3547	1493.364	-2.8921	2.0724	-0.11445	-99.94	11.901	36.042	-0.012695	-0.026367	-0.038574	-6.07	97.3528	182.99	-0.21289	0.06914	0.085156
0.114	-47.542	-175.082	1518.723	-1.9492	1.5762	-0.43164	-42.0862	11.3032	19.1614	0.073242	-0.16064	-0.1626	3.97	125.564758	188.8405	0.01416	0.01123	0.072754	35.346	-33.773	20.7196	0.065918	-0.061523	0.077637	-75.568	-14.655	1505.265	-2.8137	2.0496	-0.073438	-51.989	-4.8249	43.10055	-0.0097656	-0.023438	-0.03418	-25.642	145.025	169.292	-0.20733	0.078027	0.095605
0.116	-71.3507	-150.359	1516.358	-1.9551	1.6016	-0.4541	-100.905	66.123	-11.7916	0.063282	-0.15069	-0.16992	40.707	77.5195	172.1068	0.0063477	0.01123	0.083008	69.41094	4.7936	6.66	0.076172	-0.08252	0.085449	-67.587	-8.307	1553.1728	-2.6734	1.9914	-0.052735	-106.306	11.8578	16.417	-0.011719	-0.026855	-0.03418	-48.261	134.941	150.6065	-0.2002	0.082031	0.10059
0.118	-91.997	-207.618	1542.6456	-1.9492	1.5938	-0.49219	-112.58	51.625	26.501	0.056742	-0.14415	-0.16396	48.9723	96.648	151.4338	0.0029297	0.017578	0.096191	30.4341	32.245	-1.1533	0.081055	-0.09082	0.081055	-104.1444	16.447	1563.4873	-2.4888	1.8983	-0.035352	-86.879	-2.781	16.6331	-0.0087891	-0.030273	-0.030273	-70.15074	89.258	125.0889	-0.19179	0.085352	0.10225
0.12	-105.566	-191.56	1584.246	-1.9578	1.5559	-0.50513	-80.69327	32.63	25.1033	0.04346	-0.13008	-0.16514	41.5592	82.7528	139.252	-0.0014648	0.020752	0.09839	74.5635	-11.698	27.241	0.091797	-0.10547	0.081543	-110.5179	-23.007	1555.0103	-2.3105	1.7754	-0.026855	-46.52628	-11.42548	15.0066	-0.0031738	-0.033203	-0.03003	-75.4358	111.809	89.959	-0.18018	0.086329	0.10517
0.122	-114.982	-156.421	1590.963	-1.9917	1.5151	-0.51611	-121.228	59.3189	11.055	0.039356	-0.11329	-0.16904	80.8383	76.725	154.447	-0.0043945	0.024902	0.10156	43.395	48.134	7.4501	0.097903	-0.11719	0.081299	-120.771	-61.4405	1546.115	-2.1585	1.6446	-0.021191	-90.338	8.756	12.2791	0.0024414	-0.035645	-0.031738	-120.95	21.832	68.666	-0.16924	0.086719	0.10909
0.124	-94.126	-177.379	1595.207	-2.1089	1.5044	-0.53564	-73.7107	-1.95	45.4458	0.027344	-0.092773	-0.16797	31.372	131.479	133.6054	-0.0043945	0.029785	0.10791	56.7812	24.7417	8.51015	0.10254	-0.12354	0.084473	-176.737	-61.556	1534.4334	-2.0355	1.5184	0.0082031	-14.711	-10.4053	23.3141	0.016113	-0.041504	-0.035645	-105.037	22.676	77.3011	-0.15244	0.08789	0.11221
0.126	-71.789	-126.922	1599.224	-2.1929	1.5317	-0.54834	-77.5373	13.6913	18.583	0.018843	-0.070596	-0.17061	38.322	115.508	104.263	-0.0014648	0.028809	0.10889	80.7026	3.741	11.6122	0.10449	-0.13477	0.095703	-146.079	-92.551	1542.769	-1.9465	1.409	0.041406	-5.623	11.9045	10.4094	0.031982	-0.041748	-0.03955	-95.739	49.611	58.215	-0.13184	0.086426	0.11963
0.128	-67.65	-137.695	1553.4372	-2.3887	1.6445	-0.57617	-92.77	38.94	-2.056	0.008389	-0.048415	-0.16963	37.929	122.052	97.5482	-0.0043945	0.032227	0.10889	22.954	50.8652	2.0134	0.1084	-0.13867	0.097168	-110.6002	-39.4521	1515.9567	-1.8869	1.3092	0.06709	-25.229	11.1327	16.7466	0.050293	-0.044922	-0.040527	-106.397	3.695	55.862	-0.11114	0.079005	0.12119
0.13	-36.7619	-160.549	1542.863	-2.503	1.7603	-0.57764	-38.659	11.55027	11.815	-0.0052913	-0.023412	-0.16728	-13.469	118.305	70.2378	-0.0021973	0.03418	0.11133	29.949	-7.8947	49.836	0.12158	-0.14844	0.10645	-136.662	-24.486	1494.9208	-1.8457	1.2334	0.066406	35.509	-7.9584	21.3385	0.071777	-0.047852	-0.04834	-92.2172	59.1833	63.6023	-0.087503	0.074417	0.12119
0.132	-42.9972	-92.363	1521.353	-2.4375	1.8535	-0.48047	-62.0262	74.954	18.88883	-0.023548	-0.0036006	-0.16719	32.479	47.3935	65.5908	0.0014648	0.037598	0.10986	8.368	19.5987	36.6369	0.1272	-0.15528	0.11255	-121.87	-51.7635	1518.3959	-1.814	1.1782	0.063867	32.656	23.9472	-27.10939	0.08252	-0.045898	-0.050781	-104.634	43.320345	28.413	-0.069147	0.065432	0.12549
0.134	-43.309	-112.022	1516.728	-2.5503	1.8364	-0.56006	-44.0858	43.183	58.577	-0.044434	0.016113	-0.17383	-8.04	58.686	48.5137	0.00097656	0.038574	0.11426	-29.642	37.9408	20.684	0.13281	-0.16162	0.12012	-109.0995	-27.2814	1501.504	-1.7698	1.131	0.059375	59.5254	14.4433	-5.2447	0.10059	-0.053711	-0.051758	-89.0702	22.924	25.3987	-0.04649	0.053714	0.12295
0.136	27.679	-73.252	1546.511	-2.6326	1.9573	-0.73706	5.002	-20.571	94.221	-0.067738	0.034244	-0.17869	-44.8957	38.4455	45.1675	0.0014648	0.037598	0.11328	-2.339	-14.0272	27.024	0.14111	-0.17139	0.12939	-119.456	-22.5933	1494.206	-1.7249	1.0884	0.05625	74.9829	16.3028	5.155	0.11109	-0.057618	-0.053467	-49.7714	74.002	15.6726	-0.026367	0.041992	0.12158
0.138	31.606	-40.038	1531.936	-2.4663	2.02	-0.74561	-26.269	17.91302	102.5197	-0.089935	0.054124	-0.1828	-20.919	12.1087	64.953	0.0019531	0.041016	0.1084	-64.1423	40.077	-5.59261	0.14014	-0.17139	0.13232	-78.528	20.8913	1486.361	-1.6845	1.047	0.048047	31.1182	31.966	8.2048	0.12061	-0.065918	-0.056152	-63.7732	14.7202	9.6794	-0.007611	0.032712	0.11738
0.14	38.9418	-63.422	1550.2354	-2.1968	1.8696	-0.63037	22.804	-17.9056	145.2236	-0.12233	0.081804	-0.18594	-80.657	43.6169	43.5823	0.0053711	0.037598	0.10864	-77.8484	35.5849	8.2908	0.14014	-0.18018	0.13818	-115.9046	79.07	1445.4569	-1.6479	1.0142	0.039551	52.96952	8.9272	22.509	0.13037	-0.077148	-0.055664	-33.703	14.8958	19.2383	0.014757	0.019714	0.1168
0.142	81.254	2.295	1567.1612	-2.0977	1.7637	-0.59863	31.797	23.2221	201.462	-0.16559	0.1068	-0.18597	-86.5342	-5.686	37.7367	0.013672	0.03125	0.10742	-62.201	25.1405	5.99	0.13256	-0.17652	0.14599	-92.7398	65.615	1423.344	-1.6104	0.98262	0.030176	49.2899	31.1	-1.7812	0.12695	-0.082031	-0.058105	-0.306999999999999	34.225	25.388	0.028826	0.0052573	0.11249
0.144	81.682	4.55	1555.2571	-1.9429	1.606	-0.60205	5.767	44.119	270.258	-0.21631	0.13184	-0.18848	-86.0927	-5.0055	18.944	0.023438	0.02002	0.104	-105.033	69.8108	-26.9798	0.12598	-0.18213	0.1499	-72.527	80.737	1405.335	-1.5761	0.95459	0.020215	1.225	31.882	-0.268599999999999	0.1333	-0.089355	-0.061523	-13.612	-9.8626	6.766	0.043762	-0.0032353	0.10634
0.146	76.586	-24.181	1584.739	-1.8423	1.5122	-0.60693	59.9715	11.3186	356.613	-0.28237	0.15357	-0.20078	-122.234	9.324	14.205	0.030273	0.0078125	0.10059	-64.9787	9.1	19.4915	0.10889	-0.17725	0.15234	-88.274	77.941	1364.3687	-1.5468	0.9253	0.010449	32.953	17.9424	29.957	0.1333	-0.093995	-0.064941	13.592	47.309	4.4397	0.0625	-0.016602	0.098633
0.148	73	14.8152	1589.18338	-1.7695	1.416	-0.60742	60.129	78.304	455.667	-0.35515	0.18055	-0.20686	-64.5543	-47.479	39.366	0.046387	0.003418	0.095703	-83.596	22.2366	30.06958	0.096191	-0.17139	0.15283	-10.096	53.6025	1385.541	-1.5129	0.90234	0.0082031	-15.293	39.294	5.5314	0.13135	-0.089355	-0.062988	54.745	31.619	-1.9469	0.078284	-0.030261	0.093369
0.15	97.029	-58.333	1569.3742	-1.7085	1.3013	-0.57764	80.466	57.9875	626.933	-0.44978	0.21391	-0.21505	-88.271	-14.48055	9.54036	0.055908	-0.0061035	0.093017	-123.14	44.9826	21.5492	0.069824	-0.16309	0.15674	4.26000000000001	91.321	1361.457	-1.4844	0.88086	0.0019531	16.492	20.3757	4.606	0.12207	-0.089844	-0.065918	28.783	14.359	5.2289	0.098094	-0.044586	0.088404
0.152	110.73	-53.657	1554.005	-1.6968	1.2563	-0.55371	77.073	32.442	788.8999	-0.5655	0.25611	-0.21244	-90.633	-6.199	3.1083	0.063965	-0.015625	0.092773	-73.3549	6.6168	33.1783	0.049316	-0.15234	0.15845	-11.695	85.8792	1323.96016	-1.4445	0.85361	-0.0026367	3.825	13.1327	1.797	0.11865	-0.084961	-0.063965	58.3328	69.919	6.85549	0.11603	-0.059406	0.083698
0.154	105.825	-24.4017	1556.004	-1.6895	1.1875	-0.52734	5.88	58.286	914.0092	-0.70996	0.29834	-0.21289	-42.9299	-11.3568	7.5485	0.079102	-0.021973	0.095215	-107.82	74.959	23.8814	0.027344	-0.13818	0.15869	12.749	77.6638	1314.08	-1.4062	0.82891	-0.0076171	-67.276	33.9551	3.54	0.1167	-0.075684	-0.073242	60.287	15.7566	-6.39074	0.13498	-0.076791	0.082417
0.156	85.116	-54.889	1575.332	-1.6855	1.1626	-0.52392	11.898	-23.873	1041.687	-0.89082	0.36718	-0.20587	-77.894	41.4211	-4.582	0.087402	-0.030273	0.091797	-92.898	48.41	35.8119	-0.0029297	-0.11328	0.15381	1.836	90.1337	1268.944	-1.3684	0.80586	-0.013477	-19.843	14.6732	37.7993	0.10987	-0.066163	-0.076416	50.0988	8.4135	33.176	0.15674	-0.092773	0.080566
0.158	64.805	2.78918	1557.984	-1.6719	1.1406	-0.52441	-25.432	-24.997	1112.605	-1.0959	0.45138	-0.18903	-43.223	19.8151	17.8789	0.10059	-0.041016	0.091797	-46.647	3.6899	44.9779	-0.022705	-0.096681	0.15161	21.161	53.828	1265.5455	-1.3235	0.78272	-0.01836	-44.868	52.569	30.2164	0.10596	-0.052734	-0.080566	53.9768	23.654	28.3586	0.17694	-0.10478	0.07584
0.16	37.557	20.72996	1519.7931	-1.6406	1.1191	-0.51367	-80.206	-30.246	1187.323	-1.3345	0.55218	-0.16032	-8.792	38.625	2.176	0.11353	-0.047852	0.092041	-69.6016	47.4917	10.101	-0.040527	-0.080078	0.14355	2.495	68.8506	1282.84	-1.2866	0.76318	-0.025391	-93.238	68.7623	15.04425	0.098633	-0.037598	-0.088379	33.307	-14.3919	30.9112	0.196	-0.12105	0.074112
0.162	22.7985	5.0521	1527.4502	-1.6191	1.1133	-0.50879	-88.464	-75.921	1235.214	-1.6086	0.67102	-0.13228	-30.367	64.567	0.652899999999999	0.12207	-0.053711	0.096191	-28.226	-12.672	17.975	-0.055176	-0.05127	0.1333	-68.305	95.38653	1268.944	-1.2475	0.74571	-0.026269	-46.6389	36.3627	27.17	0.09668	-0.02832	-0.093262	33.549	59.31	34.8977	0.20985	-0.1398	0.076547
0.164	12.765	68.164	1527.37678	-1.582	1.0977	-0.49805	-163.284	-54.2154	1210.744	-1.9067	0.81689	-0.10645	17.613	7.1058	16.263	0.13818	-0.063477	0.087402	-12.344	7.91701	40.1312	-0.06543	-0.036133	0.13232	-44.19	91.731	1265.407	-1.2176	0.72696	-0.025879	-89.039	46.626	24.3316	0.094238	-0.011719	-0.096191	13.923	64.773	15.0561	0.22145	-0.15374	0.079557
0.166	0.402000000000001	57.8851	1506.4082	-1.5545	1.094	-0.48413	-217.644	-124.721	1239.585	-2.219	0.9754	-0.081784	-0.997	22.3423	11.3075	0.14355	-0.074219	0.097168	-8.505	35.0853	43.747	-0.076172	-0.011719	0.11523	-57.3912	146.26	1231.5739	-1.1926	0.71289	-0.029004	-86.71	23.094	45.653	0.085938	-0.0043945	-0.10669	-11.895	49.743	35.059	0.23486	-0.16553	0.082031
0.168	-19.113	108.995	1502.523	-1.5249	1.0884	-0.47119	-233.64308	-182.784	1242.649	-2.5076	1.1747	-0.075812	10.823	14.447964	-15.3793	0.1626	-0.080078	0.093262	53.485	-15.272	36.965	-0.085693	0.0061034	0.11059	-77.5574	139.203	1197.2744	-1.1735	0.70459	-0.027637	-70.2971	20.40899	30.7145	0.080566	0.0014648	-0.11279	-9.827	78.688	30.688	0.23958	-0.1726	0.085066
0.17	-67.08	165.293	1460.264	-1.5054	1.0718	-0.44873	-285.57	-141.784	1198.5	-2.7091	1.4173	-0.070288	62.69799	-4.7048	-0.62104	0.16943	-0.092041	0.097168	40.8558	50.374	11.609	-0.089844	0.024902	0.104	-39.666	125.7321	1197.404	-1.1523	0.69238	-0.029297	-108.961	31.9312	21.673	0.068359	0.017578	-0.11572	-54.1701	25.061	22.277	0.23858	-0.17682	0.091388
0.172	-75.599	116.806	1476.6262	-1.4937	1.0669	-0.43457	-218.332	-181.546	1165.475	-2.7879	1.6626	-0.063674	25.255	44.425	-12.912	0.17969	-0.099121	0.094727	40.6676	26.505	36.5968	-0.10156	0.051758	0.090332	-67.228	168.7605	1142.4078	-1.1351	0.68721	-0.025781	-63.2793	4.3356	28.8002	0.060547	0.028809	-0.11621	-48.7673	18.45391	34.268	0.23869	-0.18037	0.095908
0.174	-58.704	144.629	1455.7036	-1.4761	1.0474	-0.41553	-202.381	-142.446	1073.5544	-2.7612	1.813	-0.092285	64.5273	5.294	12.3269	0.18896	-0.11426	0.098145	63.4755	1.194	66.983	-0.10498	0.058105	0.08252	-74.3219	137.957	1116.9139	-1.1168	0.6834	-0.027149	-63.4361	36.013	12.906	0.050781	0.038086	-0.12793	-73.494	30.44193	23.478	0.23666	-0.17645	0.10496
0.176	-92.887	114.3038	1420.314	-1.4519	1.0295	-0.40063	-231.873	-98.098	1047.1496	-2.6116	1.8152	-0.17204	63.6544	8.8736	27.78066	0.18799	-0.12158	0.09668	37.564	64.816	47.0248	-0.11133	0.08252	0.072266	-80.6904	163.4054	1097.717	-1.0945	0.66973	-0.029883	-63.9363	43.2832	22.4343	0.037842	0.050782	-0.1272	-118.7	-12.6	16.412	0.2251	-0.17285	0.11035
0.178	-82.9578	73.047	1423.0063	-1.4292	1.0161	-0.38232	-172.872	-61.228	1055.802	-2.3661	1.6867	-0.25953	35.6983	39.4938	8.9179	0.19678	-0.13721	0.09375	61.404	1.8132	41.77	-0.12256	0.095947	0.066407	-101.416	186.7747	1075.552	-1.0702	0.66143	-0.029395	7.399	28.258	34.915	0.026855	0.057129	-0.13525	-81.058	38.324	32.172	0.21305	-0.16366	0.11478
0.18	-83.115	119.89112	1366.546	-1.3906	0.98047	-0.36719	-192.2	19.893	1025.375	-2.0549	1.4777	-0.32224	81.601	-7.85914	35.833	0.20459	-0.14624	0.094726	54.3706	21.7743	28.5455	-0.13037	0.11279	0.059082	-53.6419	153.187	1065.1678	-1.0449	0.64941	-0.035156	-23.705	47.345	31.8742	0.00097656	0.063477	-0.15479	-83.262	43.0289	5.707	0.19662	-0.151	0.12128
0.182	-118.503	67.777	1356.0723	-1.3711	0.96289	-0.35938	-202.762	-6.206	1011.473	-1.7491	1.2219	-0.36373	34.292	44.578	22.5364	0.20898	-0.15576	0.091309	20.183	23.61201	14.8546	-0.13672	0.13574	0.04541	-95.3747	191.366	1011.224	-1.0179	0.63633	-0.033106	6.161	-4.3937	78.694	-0.0083008	0.07666	-0.16455	-107.908	23.849	32.742	0.17871	-0.13207	0.12831
0.184	-98.5469	85.516	1355.169	-1.3257	0.92725	-0.35107	-163.468	-25.661	1013.9412	-1.4922	0.97852	-0.40527	5.913	42.1436	19.9367	0.20801	-0.16113	0.091797	37.541	-38.584	45.519	-0.14307	0.14697	0.040039	-135.787	167.3391	982.05	-0.98935	0.62823	-0.040332	36.736	-47.4427	100.169	-0.039063	0.091797	-0.16797	-80.5445	59.915	53.429	0.15593	-0.11007	0.13883
0.186	-83.986	116.1179	1314.549	-1.2888	0.89966	-0.33789	-194.354	-12.045	976.77	-1.3111	0.80878	-0.43459	22.435	9.71496	20.01836	0.20654	-0.15918	0.089844	-19.5	28.692	3.4229	-0.15283	0.16455	0.029297	-109.455	145.1453	987.1712	-0.95303	0.61924	-0.04541	-12.37	-29.0562	99.634	-0.080078	0.11084	-0.17456	-110.702	13.68337	41.518	0.12744	-0.086426	0.14111
0.188	-53.8607	68.857	1290.0812	-1.2495	0.86768	-0.32178	-160.171	-97.37	999.133	-1.1919	0.70763	-0.45409	-42.2982	62.127	3.579	0.20313	-0.15674	0.097168	-9.799	1.3957	8.2438	-0.16162	0.18091	0.014648	-115.543	196.8561	968.4272	-0.91738	0.60762	-0.052148	50.569	-26.8132	134.1946	-0.13721	0.12793	-0.18262	-89.2416	8.7616	59.18	0.099177	-0.064359	0.14355
0.19	-35.26	124.4742	1280.0804	-1.2012	0.82715	-0.31055	-100.853	-112.535	991.588	-1.1257	0.67037	-0.48111	-42.284883	23.165	22.554	0.198	-0.1499	0.095945	-10.801	-32.92823	48.3112	-0.17627	0.19482	0	-82.2244	158.3897	959.468	-0.88086	0.59082	-0.05957	56.2009	36.3055	189.667	-0.24121	0.15674	-0.19531	-51.2055	23.8478	40.9729	0.075833	-0.039891	0.14515
0.192	-50.4513	130.566131	1261.6516	-1.1792	0.81104	-0.3042	-92.1221	-167.026	1001.019	-1.0791	0.65939	-0.50658	-31.935	30.138	33.3232	0.18799	-0.13525	0.10303	-50.624	5.1602	58.53	-0.20557	0.22607	-0.017578	-33.496	184.722	936.5506	-0.83291	0.57646	-0.06377	42.4379	46.937	289.6979	-0.3042	0.17871	-0.20215	-74.6555	-29.97903	40.34565	0.0514	-0.013187	0.14222
0.194	-20.497	131.65078	1239.833	-1.1323	0.77393	-0.28711	-4.977	-260.111	1035.077	-1.0249	0.66064	-0.51367	-66.6109	69.045	9.223	0.16553	-0.11133	0.10596	-50.124	-66.453	87.3	-0.23047	0.24414	-0.026367	-38.4703	193.6075	883.7175	-0.78829	0.56308	-0.070703	75.483	30.619	401.041	-0.4585	0.23242	-0.21338	-29.626	-0.196999999999999	44.541	0.032288	0.01291	0.14385
0.196	19.186	183.861	1183.631	-1.104	0.74952	-0.27222	8.515	-272.182	1044.727	-0.96981	0.66378	-0.50987	-60.4117	20.6407	5.162	0.15625	-0.097168	0.10986	-62.668	-12.696	103.906	-0.29248	0.2627	-0.061523	-4.734	131.7346	880.0803	-0.74414	0.54472	-0.077344	56.515	68.249	488.438	-0.61084	0.29078	-0.21729	-5.492	-5.3151	11.699	0.012695	0.041016	0.14453
0.198	8.158	132.6584	1147.202	-1.0781	0.72852	-0.26221	18.025	-298.216	1089.057	-0.91095	0.66451	-0.5128	-81.645	61.005	-10.086	0.12646	-0.07666	0.11719	-96.821	30.975	140.3741	-0.35718	0.27807	-0.096924	15.664	190.114	852.503	-0.69629	0.52812	-0.077539	95.935	25.102	634.196	-0.77734	0.35791	-0.22021	-24.025	-5.0619	10.8303	-0.0020987	0.062554	0.14767
0.2	31.389	159.071	1138.761	-1.0391	0.69922	-0.24805	89.224	-283.887	1172.326	-0.84973	0.65397	-0.51476	-94.022	33.4572	11.2847	0.10668	-0.052978	0.11816	-87.57038	-33.3486	241.0604	-0.43164	0.2998	-0.13232	1.251	166.2033	791.363	-0.6499	0.50684	-0.092285	88.994	25.7774	819.824	-1.0464	0.479	-0.21973	33.9511	55.182	17.5431	-0.019525	0.085754	0.14459
0.202	39.92	183.424	1081.577	-1.0151	0.68994	-0.23584	81.0522	-236.362	1226.953	-0.79582	0.63766	-0.52285	-44.448	-9.8244	39.343	0.089844	-0.029297	0.11475	-148.621	28.014	329.563	-0.56689	0.33838	-0.1792	37.746	120.37	773.887	-0.60049	0.47959	-0.093652	21.9139	40.837	958.037	-1.1968	0.55908	-0.21045	32.546	16.9056	26.825	-0.032847	0.11007	0.1422
0.204	26.183	150.6236	1043.9	-0.979	0.66064	-0.22412	118.189	-255.507	1301.508	-0.74805	0.61719	-0.52148	-106.985	40.75584	25.98258	0.063477	-0.0019531	0.11719	-152.337	14.815	439.107	-0.64746	0.36719	-0.20508	16.722	170.371	710.363	-0.55039	0.44942	-0.10029	31.396	-3.973	1044.5087	-1.5269	0.74072	-0.19922	30.732	11.5185	39.945	-0.04746	0.13422	0.13783
0.206	38.559	198.893	1005.268	-0.94288	0.64111	-0.2146	123.349	-220.5903	1324.63	-0.71721	0.59494	-0.51622	-68.831	3.851	39.895	0.052246	0.012207	0.11768	-100.473	3.427	600.024	-0.82617	0.42383	-0.24023	26.95	109.49	666.711	-0.4957	0.4166	-0.10732	1.094	4.29499999999999	1109.7801	-1.8003	0.88526	-0.18945	55.071	17.2246	25.99318	-0.05957	0.16113	0.13623
0.208	9.60299999999999	155.683	988.9917	-0.9043	0.62109	-0.20752	74.966	-207.2253	1341.987	-0.70624	0.57697	-0.50217	-56.1101	19.3735	43.0849	0.03418	0.037109	0.11768	-137.737	64.5318	733.171	-0.99317	0.48193	-0.25146	40.509	158.3022	649.7351	-0.44932	0.37802	-0.11513	-78.103	-44.21	1190.453	-2.0781	1.041	-0.17432	33.562	-23.473	22.2849	-0.076041	0.19099	0.12868
0.21	-6.131	128.074	972.423	-0.85693	0.59326	-0.18506	87.79	-190.5376	1364.24	-0.72809	0.56602	-0.48966	-94.463	47.5389	44.9137	0.023193	0.057618	0.11792	-119.4324	-21.5383	855.931	-1.1812	0.54785	-0.25537	18.39	217.274	605.9518	-0.40283	0.33691	-0.12256	-75.674	-78.495	1279.709	-2.4194	1.2739	-0.14111	59.4439	8.3969	52.2091	-0.086776	0.21512	0.12665
0.212	2.95	175.421	920.179	-0.83008	0.57813	-0.17822	53.095	-120.882	1371.2356	-0.77897	0.56181	-0.47217	-39.191	-20.4718	52.261	0.010254	0.074707	0.11523	-102.3117	-23.224	919.616	-1.4702	0.67236	-0.24268	41.503	180.829	623.614	-0.35967	0.29844	-0.13291	-156.181	-78.7013	1290.432	-2.562	1.4087	-0.11572	41.3456	18.5145	20.007	-0.098467	0.23856	0.12353
0.214	-30.582	140.6366	906.7495	-0.77783	0.54346	-0.15869	38.386	-112.266	1395.9259	-0.854	0.58057	-0.44873	-43.571	13.71873	18.976	-0.0068359	0.104	0.11719	-78.084	-19.535	1004.268	-1.623	0.74219	-0.23486	28.842	224.441	586.5078	-0.31885	0.2583	-0.14209	-186.5788	-155.583	1275.875	-2.7813	1.6709	-0.085449	31.458	-2.7812	12.4797	-0.10676	0.25911	0.12246
0.216	-38.207	178.772	909.705	-0.74219	0.52246	-0.14282	74.975	-98.186	1395.025	-0.9718	0.62423	-0.41689	-11.675	-0.18	8.3013	-0.012695	0.11719	0.11719	-47.2918	-88.367	1117.168	-1.9238	0.89063	-0.20654	9.157	181.445	549.2157	-0.28057	0.22002	-0.14951	-195.796	-203.784	1258.723	-2.8786	1.8303	-0.12305	44.5159	44.203	2.61	-0.11133	0.28271	0.1167
0.218	-59.324	190.871	883.791	-0.70215	0.49561	-0.13037	5.768	-68.351	1402.226	-1.1207	0.69661	-0.39169	15.137	-35.0379	30.063269	-0.032227	0.14795	0.11133	-44.7248	-53.997	1172.591	-2.1299	1.0098	-0.16748	27.111	154.032	516.353	-0.2501	0.18438	-0.15821	-237.26	-228.38	1222.348	-2.8862	1.9165	-0.18262	-7.775	7.5779	-15.704	-0.11952	0.29443	0.1089
0.22	-78.3119	164.673	840.112	-0.65771	0.46436	-0.11182	-19.335	-105.478	1463.781	-1.2753	0.78567	-0.36513	-9.431	35.993	19.6816	-0.044189	0.16577	0.1084	2.2651	-115.1999	1180.891	-2.3159	1.1411	-0.13721	19.906	202.852	473.529	-0.21729	0.15039	-0.16553	-204.625	-254.59	1206.914	-2.6758	1.8359	-0.29492	-20.043	-10.1207	49.2306	-0.12431	0.30458	0.092791
0.222	-55.387	213.521	801.5816	-0.63672	0.45166	-0.10596	-31.56	-93.231	1509.18	-1.4282	0.87823	-0.354	48.3242	3.64174	31.826	-0.060547	0.18359	0.10498	71.687	-148.128	1184.616	-2.4766	1.3203	-0.12695	-2.426	130.573	451.0653	-0.19551	0.12276	-0.16894	-173.616	-168.589	1133.378	-2.4863	1.7266	-0.34766	3.89400000000001	-19.4119	43.704	-0.13446	0.3124	0.079112
0.224	-112.522	192.817	765.1978	-0.58203	0.41943	-0.083008	-97.349	-93.568	1545.921	-1.5659	0.979	-0.36084	58.401	30.2194	26.819	-0.077148	0.21338	0.099121	66.627	-95.805	1184.759	-2.5054	1.4048	-0.12354	-40.015	150.994	415.6411	-0.17207	0.10098	-0.17168	-174.592	-111.258	1121.447	-2.0093	1.4517	-0.42285	-59.829	-67.5983	63.926	-0.14843	0.31934	0.058699
0.226	-118.83056	168.262	736.3016	-0.5398	0.39819	-0.069825	-77.5636	-126.939	1572.865	-1.6817	1.0819	-0.38203	16.354	52.905	15.5529	-0.086914	0.22363	0.099121	128.311	-170.553	1209.263	-2.4277	1.5234	-0.12451	-71.8523	164.7196	371.69	-0.15411	0.081054	-0.18066	-154.847	-30.719	1122.808	-1.6819	1.2424	-0.46119	-41.203	-41.7751	106.5902	-0.16309	0.32324	0.04541
0.228	-104.7498	210.9184	677.819	-0.50439	0.37354	-0.055176	-140.218	-106.1	1564.2135	-1.7788	1.1783	-0.42471	53.1727	-18.6449	39.653	-0.098633	0.24756	0.095215	150.093	-181.872	1183.535	-2.2651	1.5352	-0.12256	-58.5984	105.866	359.2593	-0.13603	0.066797	-0.18262	-185.137	33.135	1090.066	-1.4214	1.0698	-0.49561	-54.2243	-43.4725	121.204	-0.18741	0.32637	0.024995
0.23	-147.262	174.827	634.9625	-0.45117	0.33984	-0.038574	-168.611	-139.103	1596.828	-1.8651	1.2528	-0.46924	44.5507	28.831	30.2961	-0.09912	0.2627	0.092041	135.909	-180.059	1145.632	-2.0464	1.4868	-0.12402	-78.0346	170.63	351.4157	-0.12402	0.055664	-0.18848	-143.616	-29.229	1090.1052	-1.2148	0.9209	-0.51953	-117.414	-60.2863	181.415	-0.22472	0.33311	0.0058514
0.232	-141.657	192.976	610.0414	-0.42236	0.32275	-0.033691	-115.975	-155.864	1630.973	-1.9478	1.3217	-0.49541	28.502	12.6786	23.8657	-0.10352	0.27344	0.088867	212.66	-207.816	1135.926	-1.7104	1.3286	-0.11475	-81.7556	142.84552	329.896	-0.1081	0.040918	-0.18887	-131.5495	-46.435	1053.43	-1.1597	0.88623	-0.52393	-117.2349	5.245	248.382	-0.27511	0.33662	-0.025008
0.234	-142.134	185.5577	571.187	-0.3667	0.2876	-0.015625	-182.329	-125.096	1633.031	-2.0405	1.3931	-0.50146	68.588	-14.3298	21.648	-0.10596	0.28467	0.083008	174.311	-95.522	1105.5308	-1.562	1.229	-0.10889	-70.7534	116.04878	325.911	-0.092188	0.030371	-0.19326	-160.753	-70.662	1054.695	-1.105	0.86572	-0.54639	-152.806	21.7489	346.39	-0.33799	0.34707	-0.061039
0.236	-156.11	166.043	557.3044	-0.32934	0.25952	-0.0090332	-167.36	-153.111	1656.133	-2.1704	1.4741	-0.50224	10.798	33.021	-8.6395	-0.10596	0.28516	0.071289	137.16	-35.468	1102.92835	-1.3198	1.0161	-0.086426	-109.376	166.5858	265.643	-0.072657	0.022949	-0.19482	-118.7388	-133.774	1083.448	-1.0478	0.84668	-0.56348	-112.8954	56.4152	533.712	-0.4165	0.37158	-0.098633
0.238	-109.9544	240.879	516.731	-0.29395	0.23438	0.0019531	-100.943	-125.5067	1624.227	-2.314	1.5543	-0.50234	13.486	-29.621	-2.4858	-0.10693	0.2915	0.041992	156.807	-27.15	1085.731	-1.2165	0.88989	-0.052002	-93.742	75.836	251.2763	-0.058594	0.014746	-0.1958	-70.3779	-133.374	1053.22	-0.96094	0.81445	-0.56641	-106.66067	69.938	693.229	-0.51415	0.39355	-0.13545
0.24	-107.1589	242.043	480.526	-0.25195	0.2041	0.011719	-112.007	-119.388	1589.1456	-2.4636	1.6469	-0.50429	11.863	-16.235	27.787	-0.11524	0.30249	0.03833	77.333	-15.092	1056.2145	-1.1597	0.78467	-0.0073242	-75.1663	105.0108	244.8428	-0.04248	0.0024414	-0.19629	-72.7009	-186.5546	1050.777	-0.81543	0.74219	-0.57617	-147.19	-2.3458	803.135	-0.63427	0.42949	-0.16631
0.242	-82.9162	225.235	476.464	-0.23047	0.18555	0.016602	-69.8694	-126.312	1590.10184	-2.5303	1.7387	-0.47265	-32.311	-9.68313	35.047	-0.12988	0.31055	0.023926	48.106	-97.014	1068.6364	-1.1538	0.71729	0.030762	-69.90064	133.8609	214.3926	-0.027344	-0.0022461	-0.20117	12.9748	-225.8256	1097.263	-0.73828	0.70508	-0.5791	-77.7172	-14.11766	884.983	-0.78817	0.48339	-0.18194
0.244	-44.657	230.446	443.102	-0.19434	0.15576	0.023926	-69.6613	-74.111	1568.518	-2.6113	1.793	-0.47266	-23.232	-70.979	87.488	-0.17041	0.3291	0.0073242	41.054	-145.337	1063.092	-1.1543	0.70508	0.038574	-51.918	96.155	199.576	-0.017285	-0.0083008	-0.20508	9.969	-253.986	1128.485	-0.58594	0.61719	-0.5957	-61.0818	-35.626	969.9548	-0.97929	0.55371	-0.19785
0.246	-72.1286	172.47583	410.4642	-0.17382	0.1372	0.026612	-48.844	-82.712	1579.7289	-2.8273	1.8899	-0.61523	-26.593	-33.085	107.0378	-0.19678	0.33936	-0.0024414	32.7363	-167.9504	1072.125	-1.1304	0.70361	0.058105	-56.4287	163.383	161.353	-0.0051758	-0.025488	-0.20703	40.9725	-309.611	1196.519	-0.48657	0.55371	-0.59766	-65.043	-43.152	1087.944	-1.1914	0.6416	-0.20215
0.248	-17.913	182.1524	407.872	-0.15283	0.12061	0.034668	18.96056	-58.067	1587.948	-2.8464	2.0044	-0.67373	-60.8617	-52.3322	128.4757	-0.26172	0.3584	-0.039551	46.3946	-224.4372	1081.7178	-1.0922	0.72022	0.07959	-68.873	126.954	126.001	0.0042969	-0.038281	-0.20957	111.775	-299.658	1259.7288	-0.41309	0.50195	-0.59863	-54.572	5.506	1140.397	-1.4272	0.75128	-0.18682
0.25	-9.401	174.6663	386.2174	-0.13086	0.09668	0.039063	7.3819	-4.7052	1569.732	-2.7405	2.0102	-0.63545	-87.9853	-78.11	178.202	-0.32495	0.38062	-0.077393	42.7019	-194.768	1057.606	-1.0469	0.7373	0.099609	-26.177	100.552	148.3634	0.011719	-0.04834	-0.20947	84.471	-292.925	1301.637	-0.37646	0.44775	-0.57373	-43.4361	-45.502	1116.359	-1.6682	0.8625	-0.15703
0.252	8.03599999999999	148.845	376.009	-0.12305	0.086914	0.041992	61.7154	-14.0257	1571.481	-2.6003	1.9704	-0.60713	-128.274	2.6821	243.282	-0.39209	0.41064	-0.11865	23.1505	-242.0812	1081.597	-0.99023	0.76367	0.11084	-16.336	129.288	137.7912	0.018555	-0.061133	-0.20644	114.076	-293.372	1365.782	-0.38477	0.42773	-0.57227	32.812	-99.5628	1116.943	-1.9056	0.97422	-0.11407
0.254	25.421	181.933	336.1519	-0.10742	0.072754	0.04834	90.753	27.908	1574.314	-2.4258	1.9023	-0.60352	-121.886048	-11.8528	370.672	-0.51953	0.4707	-0.1748	18.5806	-297.206	1129.083	-0.96875	0.77246	0.10742	23.988	35.297	116.9925	0.019141	-0.074023	-0.20527	134.634	-231.8146	1382.652	-0.44824	0.40723	-0.5625	93.5244	-114.336	1151.445	-2.129	1.094	-0.076855
0.256	13.293	150.924	290.335	-0.10181	0.062988	0.056397	63.3583	51.2794	1579.8537	-2.2424	1.8014	-0.59629	-122.055	38.6991	551.697	-0.64599	0.53394	-0.20336	-56.055	-291.492	1165.432	-0.95898	0.77734	0.069336	23.818	59.1943	106.5563	0.01875	-0.082226	-0.20723	80.45	-216.6104	1382.89	-0.53711	0.42432	-0.54785	91.492	-181.994	1202.257	-2.3179	1.2212	-0.044922
0.258	41.632	135.6771	274.6674	-0.09375	0.054199	0.053223	106.122	26.484	1606.725	-2.089	1.6727	-0.58818	-153.452	72.88	692.112	-0.79443	0.60986	-0.22803	-99.214	-351.68	1238.8911	-0.95776	0.78833	0.019776	11.595	73.585	81.839	0.015722	-0.090234	-0.19736	98.734	-180.9332	1394.085	-0.65869	0.4668	-0.51855	123.332	-199.349	1227.239	-2.4158	1.3577	-0.016309
0.26	65.4991	142.546	255.572	-0.087402	0.043457	0.066406	93.636	17.344	1598.6315	-1.9733	1.5415	-0.57881	-124.619	-21.1321	816.389	-1.0366	0.73535	-0.25537	-100.2944	-326.594	1280.09	-0.9668	0.79395	-0.033203	30.736	35.54125	90.3423	0.0024414	-0.098145	-0.19336	64.436	-137.198	1392.8144	-0.87939	0.57275	-0.48779	137.62	-208.407	1147.68	-2.4139	1.4693	0.0034179
0.262	20.509	117.4601	241.959	-0.084473	0.04248	0.071289	99.456	-28.70049	1603.2638	-1.8996	1.4344	-0.56133	-125.7732	-10.926	890.956	-1.1733	0.81006	-0.25928	-149.2	-248.377	1302.37	-0.9873	0.80273	-0.10254	37.836	112.489	78.7357	-0.0060547	-0.096094	-0.18769	54.409	-163.055	1417.0501	-1.0015	0.63818	-0.46436	148.616	-238.95	1127.582	-2.3046	1.538	0.018653
0.264	45.927	115.7633	236.57	-0.086914	0.039551	0.08252	148.945	-42.137	1606.3286	-1.8413	1.354	-0.54248	-109.5292	-55.543	976.8077	-1.459	0.97656	-0.24463	-120.952	-241.447	1298.652	-0.99854	0.80908	-0.12256	56.8237	79.874	66.977	-0.020215	-0.098047	-0.18086	96.444	-138.468	1435.8659	-1.2583	0.77588	-0.42871	201.647	-140.98	1127.119	-2.1124	1.5478	0.016407
0.266	36.165	126.033	212.7624	-0.088135	0.043213	0.087891	96.254	-8.677	1584.6791	-1.8027	1.2882	-0.51856	-67.593	-83.806	1081.649	-1.6772	1.1137	-0.21924	-144.49	-169.918	1245.013	-1.0405	0.81104	-0.14844	53.8367	32.4945	81.234	-0.034668	-0.093359	-0.17383	38.08535	-140.347	1445.951	-1.4995	0.92041	-0.4248	157.211	-63.355	1077.47578	-1.8706	1.4907	0.0083008
0.268	-1.537	108.7891	205.153	-0.089355	0.046387	0.09082	76.7656	-24.611	1572.562	-1.771	1.2407	-0.49815	-103.5068	-16.252	1116.561	-1.8887	1.2568	-0.18896	-136.45	-150.373	1267.684	-1.0804	0.81519	-0.15577	24.026	60.6113	62.0126	-0.052051	-0.085742	-0.16162	32.6585	-171.121	1460.3823	-1.6133	1.0039	-0.4375	158.351	-21.148	1071.5376	-1.6178	1.3658	-0.0054688
0.27	25.781	132.736	188.789	-0.090332	0.054199	0.10449	64.885	13.314	1545.43783	-1.7522	1.2048	-0.47315	-58.46259	-82.995	1109.152	-2.1343	1.4517	-0.15039	-68.7011	-149.856	1319.797	-1.1172	0.82227	-0.1543	23.656	-19.71	59.0162	-0.07373	-0.072266	-0.15381	16.84191	-138.939	1482.8943	-1.8184	1.168	-0.49707	151.035	8.24199999999999	1064.912	-1.3931	1.2012	-0.022168
0.272	-12.41	125.536	158.733	-0.088379	0.05957	0.10645	11.089	38.6643	1531.7574	-1.7397	1.1841	-0.45117	-12.69878	-114.2349	1122.84	-2.2363	1.5469	-0.1416	-63.1943	-118.729	1360.181	-1.1479	0.82324	-0.146	12.835	15.5534	50.1465	-0.094534	-0.058496	-0.14463	-52.346	-149.7873	1504.8948	-1.9492	1.2861	-0.54785	30.998	-84.431	1065.8618	-1.2071	1.0317	-0.031152
0.274	-45.559	126.054	139.059	-0.085449	0.063477	0.11621	25.803	32.0273	1550.497	-1.7222	1.1724	-0.42822	19.459	-112.601	1160.921	-2.3789	1.7188	-0.1499	-30.9977	-159.5834	1408.4253	-1.1675	0.82861	-0.14844	-3.347	31.1126	18.2921261	-0.11308	-0.04209	-0.13594	-29.1001	-160.638	1555.518	-2.0762	1.3906	-0.57373	38.167	-157.1835	1115.766	-1.0723	0.89492	-0.033789
0.276	-39.627	128.36	111.828	-0.082031	0.068359	0.11865	-0.858000000000001	85.911	1544.1302	-1.7077	1.1614	-0.41309	96.2564	-175.639	1217.662	-2.3911	1.8218	-0.15332	4.112	-153.4964	1404.787	-1.2046	0.82861	-0.15771	-15.622	-23.2301	27.03617	-0.13066	-0.024121	-0.12266	-52.409	-153.811	1567.564	-2.2378	1.5239	-0.59424	58.1402	-186.838	1071.9525	-0.98047	0.79199	-0.029785
0.278	-83.227	79.2256	97.769	-0.074219	0.07373	0.12158	-59.966	95.8625	1519.825	-1.6882	1.1505	-0.39629	102.203	-149.448	1216.469	-2.3125	1.8691	-0.15039	1.781	-141.923	1404.2398	-1.2359	0.83204	-0.18091	-24.775	51.752	24.493	-0.14307	-0.006543	-0.11211	-87.671	-185.767	1604.528	-2.3281	1.584	-0.59961	39.867	-249.743	1063.784	-0.91602	0.73789	-0.040332
0.28	-64.115	52.191	94.3906	-0.062012	0.080078	0.12354	-60.93	119.27	1496.1587	-1.6597	1.1337	-0.38301	105.394	-197.945	1187.142	-2.0874	1.8345	-0.14111	41.855	-166.006	1438.461	-1.2813	0.84375	-0.19531	-53.0516	29.2307	17.432	-0.15576	0.012207	-0.10303	-65.555	-167.525	1619.258	-2.5	1.6953	-0.61523	55.6972	-203.867	1060.1296	-0.86748	0.71885	-0.053418
0.282	-71.3328	37.615	74.3449	-0.050049	0.082519	0.12891	-135.352	186.918	1436.721	-1.6304	1.1129	-0.37305	141.512	-229.253	1180.88	-1.937	1.7935	-0.13135	16.032	-117.9585	1436.318	-1.4063	0.89844	-0.1958	-58.8448	18.9388	42.795	-0.16338	0.032031	-0.09375	-89.596	-170.86	1614.629	-2.6052	1.7522	-0.62671	24.7672	-233.258	1031.733	-0.82178	0.72315	-0.048339
0.284	-119.136	4.58	74.2611	-0.037109	0.075684	0.12256	-132.316	161.8159	1413.658193	-1.6016	1.0879	-0.36328	112.304	-135.739	1164.6324	-1.6328	1.707	-0.10059	-10.826	-149.4639	1464.987	-1.4897	0.94385	-0.19531	-78.8961	64.034	46.507	-0.17266	0.049414	-0.086231	-48.837	-182.837	1617.872	-2.668	1.7773	-0.64355	-1.118	-269.386	1082.888	-0.76875	0.74141	-0.042481
0.286	-80.1943	27.498	55.7537	-0.017578	0.077637	0.12109	-110.756	175.674	1414.6954	-1.5699	1.0605	-0.34766	141.776	-89.677	1155.341	-1.4566	1.6362	-0.066162	61.5891	-180.7047	1507.78	-1.6973	1.0625	-0.19482	-88.1693	-15.147	44.478	-0.17773	0.068164	-0.075293	-22.0505	-137.9851	1579.1832	-2.6694	1.7524	-0.68311	-19.6798	-278.177	1113.758	-0.72803	0.77197	-0.038086
0.288	-113.622	31.3723	42.3556	-0.0097656	0.074219	0.11621	-148.943	171.86	1389.9986	-1.5386	1.0322	-0.33975	164.567	-32.22	1161.5079	-1.3374	1.5649	-0.029297	34.317	-156.036	1531.402	-1.8784	1.1772	-0.18701	-70.9071	10.458	13.7158	-0.18145	0.080078	-0.066601	-31.1791	-154.83	1572.3913	-2.6484	1.7344	-0.69531	-57.789	-364.61	1180.387	-0.70576	0.80694	-0.050098
0.29	-102.152	33.7641	45.911	0.0083008	0.0625	0.11377	-106.887	116.7664	1380.5986	-1.5089	1.0024	-0.32959	80.871	-40.4	1167.679	-1.2573	1.481	0.024902	62.8674	-191.7125	1574.967	-2.0664	1.3057	-0.17383	-78.565	15.6962	-14.373	-0.18408	0.085938	-0.05957	16.5125	-134.744	1574.301	-2.5952	1.7446	-0.71436	-71.710343	-364.08	1253.326	-0.70947	0.83408	-0.075097
0.292	-80.5804	39.5821	18.177	0.018311	0.054931	0.11231	-140.337	132.1903	1350.82	-1.4782	0.97099	-0.31807	56.456	-114.792	1191.995	-1.2275	1.4336	0.049805	104.36	-165.212	1551.098	-2.3086	1.4805	-0.14893	-80.9155	-44.617	8.7405	-0.1835	0.091797	-0.056934	-1.229	-82.933	1548.194	-2.5778	1.7708	-0.7395	-106.995	-282.989	1244.783	-0.73526	0.86728	-0.12119
0.294	-94.7923	28.73	9.512	0.030273	0.046875	0.10986	-168.552	120.152	1313.491	-1.4448	0.94238	-0.3042	34.552	-143.596	1176.8332	-1.1582	1.3457	0.067383	44.465	-125.9344	1523.7869	-2.416	1.5762	-0.12646	-95.1682	28.38165	24.8956	-0.17959	0.090332	-0.052051	11.279	-66.42	1541.383	-2.5522	1.7935	-0.73975	-134.668	-248.951	1257.235	-0.7667	0.89658	-0.17275
0.296	-43.794	31.246	22.022	0.039063	0.028809	0.11328	-120.1868	116.495	1311.1354	-1.4014	0.91523	-0.29531	26.1187	-218.437	1170.2311	-1.0681	1.2688	0.074707	53.66	-137.211	1504.21724	-2.5757	1.7388	-0.10156	-85.091	18.0422	22.8211	-0.16748	0.086426	-0.050488	83.975	-15.972	1558.842	-2.4785	1.7949	-0.70996	-114.126	-158.365	1232.1172	-0.82031	0.93652	-0.22754
0.298	-45.4084	20.6007	7.834	0.038086	0.021484	0.11279	-150.935	171.6066	1249.636	-1.3577	0.88799	-0.28437	96.435	-268.716	1177.638	-0.95117	1.1914	0.080078	22.719	-87.369	1484.943	-2.6343	1.8521	-0.071777	-68.8473	-0.478999999999999	28.5226	-0.15723	0.077344	-0.045606	69.391	5.044	1546.253	-2.4219	1.7852	-0.6875	-112.552	-148.925	1215.414	-0.87686	0.97295	-0.27764
0.3	-61.8726	5.644	28.1875	0.045898	0.0048828	0.11182	-111.2173	140.197	1249.7552	-1.314	0.85987	-0.27266	75.681	-256.941	1171.372	-0.78271	1.0825	0.10107	5.544	-60.737	1491.4171	-2.6284	1.8813	-0.060059	-66.1646	64.851	9.019	-0.14307	0.063477	-0.048828	107.342	-9.465	1563.443	-2.2734	1.6992	-0.66016	-68.1	-171.382	1276.3694	-0.94053	1.0095	-0.3208
0.302	19.043	29.9002	34.106	0.052491	-0.0078127	0.10888	-59.819	158.69	1274.779	-1.2679	0.82861	-0.26523	71.331	-295.847	1185.7469	-0.70264	1.02	0.10547	3.816	-50.0876	1499.1487	-2.457	1.877	0.0024414	-50.4889	3.26479	17.794	-0.13252	0.046289	-0.049316	122.865	20.331	1573.001	-2.1533	1.6089	-0.65186	-41.9219	-129.91	1312.218	-1.0108	1.0454	-0.35752
0.304	13.014	40.094	-1.84768	0.057617	-0.020508	0.11035	-60.6102	184.895	1239.154	-1.2246	0.79688	-0.25195	66.373	-292.133	1213.187	-0.58447	0.90088	0.099609	-51.101	0.388000000000002	1496.903	-2.4448	1.8091	-0.049073	-20.375	28.8586	23.4559	-0.12256	0.024023	-0.051269	93.439	14.127	1567.2837	-2.0425	1.5044	-0.646	-58.7544	-150.0885	1337.29	-1.0753	1.0806	-0.38144
0.306	10.718	28.4383	14.94424	0.072754	-0.033203	0.10254	-20.464	154.1129	1237.352	-1.1779	0.75967	-0.24346	3.2691	-301.572	1255.461	-0.54199	0.81494	0.066162	-82.55108	-18.412	1504.636	-2.4351	1.7778	-0.12891	1.216	40.8961	7.7881	-0.11319	0.0013672	-0.049317	157.966	9.659	1588.6832	-1.9219	1.3809	-0.62695	-24.474	-144.2085	1367.051	-1.1245	1.1089	-0.38525
0.308	46.965	41.4152	4.49329	0.078613	-0.045898	0.10156	-1.227	204.625	1202.496	-1.1323	0.72705	-0.23174	-23.7748	-343.21	1325.3393	-0.52051	0.7373	0.013184	-92.7779	-8.037	1502.228	-2.2358	1.6968	-0.092285	-3.748	-18.604	-2.24676	-0.10029	-0.020508	-0.051758	137.759	26.3566	1578.5434	-1.877	1.3301	-0.61914	0.946999999999999	-120.4669	1341.782	-1.1551	1.1246	-0.40078
0.31	12.299	33.233	-10.1084	0.098145	-0.054688	0.10596	15.688	204.72	1140.2254	-1.098	0.69424	-0.22392	-57.987	-315.163	1349.082	-0.53223	0.6582	-0.066406	-132.502	14.444	1503.137	-2.1455	1.6113	-0.047852	-13.378	44.065	7.41005	-0.088379	-0.041504	-0.054688	124.382	-12.4079	1578.0151	-1.8164	1.2539	-0.60547	7.687	-178.779	1366.737	-1.1843	1.1309	-0.40684
0.312	73.12526	21.1333	11.311	0.11157	-0.062988	0.10132	72.662	177.629	1105.4448	-1.0703	0.66308	-0.21328	-107.2076	-266.581	1348.697	-0.55029	0.6333	-0.10059	-145.237	-23.483	1532.13723	-2.0249	1.481	-0.026367	2.082	24.1502	11.5781	-0.075195	-0.061133	-0.054004	177.518	-18.4484	1572.966	-1.7884	1.218	-0.59644	39.053	-136.497	1396.962	-1.2106	1.1328	-0.42012
0.314	66.993	8.9704	0.965	0.125	-0.077637	0.10352	45.262	227.575	1042.987	-1.0444	0.63525	-0.19971	-115.854	-220.6299	1347.09	-0.6123	0.61426	-0.14648	-161.458	-11.054	1517.874	-1.9556	1.399	-0.040039	36.077	23.6084	29.9272	-0.066504	-0.076269	-0.057324	120.225	-31.1355	1559.238	-1.7632	1.1919	-0.58643	22.1983	-129.418	1400.148	-1.2391	1.1301	-0.43457
0.316	23.444	-10.584	17.3772	0.14893	-0.092285	0.10352	47.987	168.165	1030.90948	-1.0159	0.61631	-0.1877	-133.141	-166.348	1341.0842	-0.67359	0.62232	-0.16821	-173.418	-38.7395	1513.514	-1.8921	1.3247	-0.058594	46.785	96.059	14.2908	-0.050488	-0.083692	-0.06084	97.981	-43.0826	1569.785	-1.7363	1.1641	-0.57715	24.1234	-167.583	1471.215	-1.2842	1.1328	-0.44629
0.318	72.50569	5.7033	24.5432	0.15332	-0.10596	0.10156	72.489	189.036	1034.398	-0.99141	0.59834	-0.17109	-98.224	-191.349	1351.3879	-0.74609	0.65234	-0.18604	-153.905	-53.007	1524.7903	-1.8198	1.2427	-0.055176	27.808	31.482	15.44401	-0.036426	-0.092285	-0.065625	103.714	2.955	1553.893	-1.7227	1.1563	-0.57422	80.904	-135.185	1516.54	-1.3547	1.1512	-0.44687
0.32	15.669	31.9876	17.3969	0.17188	-0.12402	0.097168	10.613	199.643	983.586	-0.96601	0.57998	-0.15664	-56.16345	-184.843	1390.5496	-0.85889	0.72119	-0.20068	-175.911	-25.041	1512.8268	-1.7925	1.2075	-0.061523	24.166	42.63	32.1436	-0.01709	-0.10254	-0.072754	60.919	15.984	1517.9071	-1.6875	1.1445	-0.5708	62.721	-194.278	1519.807	-1.459	1.198	-0.43008
0.322	19.947	44.9471	32.6989	0.18164	-0.13867	0.098878	21.765	138.167	961.774	-0.93662	0.56318	-0.14043	-85.394	-170.737	1388.669	-0.92285	0.76074	-0.21387	-116.694	-57.315	1520.548	-1.7612	1.1567	-0.057129	14.143	36.0453	27.2507	0.0068358	-0.11465	-0.075586	76.548	48.3178	1516.8765	-1.6511	1.1331	-0.55932	95.986	-194.128	1508.921	-1.5961	1.2672	-0.40235
0.324	34.904	62.545	35.549	0.18848	-0.1582	0.10059	3.128	192.8776	915.626	-0.8999	0.54639	-0.13037	-67.624	-177.7023	1413.478	-1.041	0.85352	-0.25781	-122.6984	-57.797927	1525.701	-1.7478	1.135	-0.066407	8.663	-24.91	29.886	0.035058	-0.12324	-0.089648	22.1631	108.098	1509.991	-1.6152	1.1172	-0.55566	122.302	-140.2362	1461.8629	-1.7578	1.366	-0.36445
0.326	-17.288	56.921	33.889	0.19531	-0.1709	0.10303	-31.725	189.622	897.1428	-0.86162	0.52373	-0.11602	-41.57	-151.4103	1409.697	-1.133	0.93823	-0.2832	-157.101	-23.32	1502.6933	-1.7285	1.125	-0.072266	14.986	36.347	27.3544	0.060058	-0.13653	-0.085351	12.7813	124.528	1505.2418	-1.5615	1.0938	-0.5459	66.5532	-163.584	1464.2773	-1.9292	1.4849	-0.32617
0.328	4.253	52.125	26.5768	0.19727	-0.17969	0.10156	-16.86	165.3231	896.4985	-0.81445	0.49931	-0.10625	-66.787	-167.503	1403.024	-1.2363	1.0449	-0.30566	-92.5653	-41.781	1512.061	-1.7104	1.1294	-0.076172	-3.927	12.2462	16.9013	0.083887	-0.14834	-0.092187	18.4177	150.021	1499.1192	-1.5327	1.0767	-0.5415	58.7175	-93.2327	1477.407	-2.0893	1.6033	-0.28926
0.33	-23.867	43.488	12.19	0.19727	-0.18896	0.10352	-61.18	222.916	861.592	-0.76758	0.47275	-0.092969	-17.514	-197.936	1434.272	-1.4019	1.2368	-0.31787	-88.309	3.018	1474.2509	-1.7012	1.1328	-0.077148	-12.158	10.79549	41.7416	0.099609	-0.16504	-0.098633	-41.757	164.972	1450.8011	-1.4858	1.0493	-0.52295	20.041	-66.8256	1464.279	-2.2176	1.7117	-0.24864
0.332	-75.546	27.099	23.5654	0.19385	-0.19385	0.10229	-85.6247	161.7102	835.8	-0.71982	0.44736	-0.079785	-19.581	-188.665	1447.985	-1.4995	1.3511	-0.31689	-117.9648	31.4243	1454.209	-1.6831	1.1401	-0.063965	-18.405	80.125	25.326	0.11328	-0.17588	-0.10273	-51.594	133.8806	1442.349	-1.4595	1.0263	-0.50781	25.549	-76.936	1474.844	-2.2906	1.8011	-0.19356
0.334	-52.131	21.4607	34.0587	0.1875	-0.19385	0.104	-91.972	166.234	814.507	-0.67041	0.41748	-0.065918	-38.7362	-228.329	1469.28	-1.7168	1.6055	-0.31738	-56.412	44.6433	1446.6039	-1.6606	1.1421	-0.062988	-48.4923	30.64768	25.1192	0.11953	-0.18623	-0.10273	-34.75	149.699	1423.2398	-1.4331	1.0063	-0.49463	13.155	-26.3219	1476.93	-2.2885	1.8353	-0.12588
0.336	-96.273	22.7424	16.5637	0.17773	-0.18848	0.10547	-126.685	192.8725	736.3518	-0.61904	0.38506	-0.053809	-6.695	-218.505	1503.7276	-1.8999	1.791	-0.32324	-57.255	87.879	1402.903	-1.6348	1.1426	-0.060059	-57.9288	41.22648	62.997	0.12032	-0.19795	-0.11172	-67.328	135.341	1372.2932	-1.3984	0.9707	-0.4707	-51.163	-57.3873	1470.471	-2.4375	1.8379	-0.20117
0.338	-89.048	14.946	20.9834	0.17529	-0.18164	0.10303	-119.4627	137.747	697.3197	-0.57159	0.35742	-0.041016	-37.568	-184.9584	1519.5357	-2.0796	1.9517	-0.34229	-52.958	72.642	1376.166	-1.5977	1.1309	-0.051758	-45.0639	44.22943	49.3317	0.11358	-0.19903	-0.11621	-41.991	96.459	1363.2373	-1.3745	0.95752	-0.46094	-66.646	-30.146	1482.812	-2.529	1.8706	-0.26846
0.34	-71.772	28.086	13.997	0.16016	-0.16748	0.10254	-126.2177	191.863	651.099	-0.52119	0.32969	-0.027734	6.00700000000001	-180.6891	1539.913	-2.2671	2.0962	-0.35352	-15.764	81.047	1378.82	-1.5757	1.1187	-0.045898	-84.877	-21.5842	45.3679	0.10742	-0.2041	-0.12451	-64.18	105.9921	1317.372	-1.3281	0.92676	-0.4375	-88.146	25.523	1461.55	-2.5015	1.8559	-0.22862
0.342	-117.579	27.4841	24.2007	0.14624	-0.1565	0.10766	-151.197	168.494	596.521	-0.46905	0.29502	-0.019726	49.477	-126.711	1523.904	-2.3164	2.1445	-0.34961	-15.304	92.374	1359.7411	-1.5386	1.1021	-0.037598	-78.7571	40.7011	27.9031	0.097557	-0.20225	-0.12363	-99.308	72.452	1312.33594	-1.2868	0.906	-0.4165	-101.868	-10.214	1488.3347	-2.4464	1.7782	-0.15986
0.344	-83.1752	25.9287	56.772	0.12988	-0.14014	0.10742	-142.417	127.212	590.504	-0.4165	0.2666	-0.012695	10.883	-109.724	1487.3676	-2.3433	2.1938	-0.34473	30.755	50.2032	1355.236	-1.5075	1.0774	-0.035401	-96.157	22.4133	9.737	0.087012	-0.1999	-0.13008	-47.9108	82.389	1306.6712	-1.2515	0.8833	-0.40381	-114.2407	-10.287	1520.71269	-2.3855	1.6883	-0.14384
0.346	-77.4197	29.8052	39.76	0.11084	-0.12207	0.10938	-160.799	203.3932	520.448	-0.3708	0.23604	-0.0022461	36.182	-119.9983	1509.7086	-2.3127	2.2083	-0.33227	39.587	77.66	1320.3933	-1.4702	1.061	-0.030762	-96.3127	3.3912	40.8	0.079199	-0.19209	-0.13359	-74.431	114.2556	1261.7279	-1.1968	0.85498	-0.37646	-158.534	-43.0506	1513.0557	-2.2905	1.5952	-0.14648
0.348	-82.904	12.14	34.9185	0.099121	-0.11133	0.1123	-131.636	157.1556353	508.229	-0.32334	0.20782	0.0043945	23.315	-100.4764	1496.1682	-2.2476	2.2075	-0.31885	10.568	58.855	1289.9315	-1.4214	1.0337	-0.027344	-70.54051	57.78	34.869	0.063575	-0.18125	-0.13955	-29.6385	88.207	1259.546	-1.1719	0.83789	-0.36523	-144.843	-97.777	1517.811	-2.1732	1.4996	-0.15293
0.35	-38.052	4.4759	41.7355	0.072754	-0.089844	0.1167	-120.0836	206.656	502.898	-0.27608	0.18164	0.0083007	-3.973	-103.624	1505.546	-2.1558	2.2036	-0.29102	20.903	16.603	1290.8569	-1.3984	1.0215	-0.026855	-73.826	-3.7238	31.1432	0.056152	-0.1748	-0.1499	14.821	121.4811	1232.5168	-1.1226	0.80225	-0.34277	-117.983	-47.1937	1504.8127	-2.0523	1.4008	-0.15967
0.352	-66.5976	3.152	39.7392	0.04956	-0.069824	0.11719	-141.136	241.877	445.582	-0.23887	0.1538	0.012012	-11.426	-79.443	1503.287	-2.1206	2.1938	-0.271	2.052	53.9178	1247.6648	-1.3472	0.98877	-0.030762	-64.6775	11.5553	40.9016	0.045508	-0.16084	-0.15176	-34.3882	136.5313	1178.3763	-1.0806	0.76513	-0.32153	-144.247	-76.6834	1490.05	-1.9442	1.3121	-0.16123
0.354	-26.666	2.4099	51.361	0.029785	-0.057617	0.11475	-93.7828	178.4425	435.601	-0.19727	0.13428	0.013184	-60.562	-50.295	1459.809	-2.0737	2.1802	-0.24414	-25.147	40.188	1236.1018	-1.3049	0.96655	-0.03247	-61.238	20.7131	28.913	0.034472	-0.14619	-0.16026	19.841	138.8248	1166.661	-1.0449	0.73242	-0.30273	-124.4387	-82.269	1507.666	-1.8584	1.2385	-0.16894
0.356	15.201	20.7445	37.6703	0.0087891	-0.034668	0.10938	-76.94731	223.598	406.555	-0.16582	0.11172	0.022071	-60.388	-53.227	1464.777	-2.0319	2.1662	-0.21899	-47.266	58.539	1233.60879	-1.2632	0.94092	-0.030762	-59.2785	-47.348	69.9932	0.027832	-0.12822	-0.1665	36.499	187.609	1143.75	-0.99609	0.68555	-0.27197	-98.8386	-51.626	1468.0633	-1.7861	1.1895	-0.17578
0.358	-15.464	17.2189	6.499	0.0019531	-0.020508	0.10107	-62.3252	179.969	388.7552	-0.13623	0.091309	0.028516	-72.26	0.0789999999999935	1476.326	-1.9766	2.125	-0.19824	-78.5563	91.851	1196.0302	-1.2124	0.90381	-0.036621	-20.324	-9.2033	75.9384	0.0082033	-0.11914	-0.17129	31.143	170.2469	1105.269	-0.9707	0.66357	-0.26074	-102.3106	-86.531	1459.6201	-1.7197	1.1506	-0.19111
0.36	28.474	-0.4666	32.2371	-0.01123	0.00097656	0.10889	-6.393	121.667	389.598	-0.11357	0.07295	0.033594	-118.235	22.451	1504.217	-1.8633	2.0156	-0.18799	-74.9506	56.68009	1168.1708	-1.1885	0.87891	-0.032715	-32.233	-36.7136	68.0055	-0.0087891	-0.10498	-0.17285	79.6046	155.933	1076.391	-0.93164	0.61523	-0.23389	-63.1714	-32.1114	1475.7478	-1.6676	1.1297	-0.2084
0.362	17.717	11.2751	19.3975	-0.017578	0.013672	0.10888	5.622	182.6468	336.8136	-0.097365	0.058496	0.037989	-80.6787	-19.635	1546.691	-1.8008	1.9492	-0.18457	-92.5166	101.5794	1141.8446	-1.1387	0.83301	-0.036133	2.347	-55.567362	109.047	-0.036133	-0.083594	-0.175	57.1892	190.969	998.761	-0.90039	0.58447	-0.21777	-70.6632	7.276	1460.6737	-1.6255	1.1173	-0.21426
0.364	10.612	7.5029	4.4082	-0.024902	0.029297	0.10498	39.232	134.3853	314.2497	-0.088867	0.046875	0.041504	-118.584	-25.994	1528.4739	-1.668	1.8086	-0.16406	-101.244	123.473	1121.0215	-1.1011	0.79736	-0.038818	21.468	28.1032	159.594	-0.070703	-0.066504	-0.17666	60.0704	159.5672	974.683	-0.86865	0.55518	-0.2002	-68.8013	7.6872	1460.572	-1.5899	1.107	-0.22051
0.366	80.3183	9.37916	18.0614	-0.03125	0.045898	0.10205	70.4863	171.911	305.16603	-0.087402	0.036133	0.051269	-187.991	-83.995	1508.28845	-1.5789	1.7121	-0.17041	-60.329	114.538	1111.278	-1.0684	0.76563	-0.047363	18.006	-2.314	246.4412	-0.11992	-0.05166	-0.18096	63.8103	181.396	949.309	-0.82275	0.51367	-0.17529	-19.88	87.309	1431.3329	-1.564	1.0981	-0.22217
0.368	30.2774	12.734	10.505	-0.036133	0.058594	0.095215	59.1079	184.711	275.2655	-0.085449	0.02793	0.059375	-146.8495	-97.067	1497.5925	-1.5034	1.6294	-0.16357	-93.175	181.8343	1046.861	-1.0273	0.71875	-0.037598	35.257	47.352	320.975	-0.18076	-0.032812	-0.18487	11.577	160.4833	903.7508	-0.80078	0.49902	-0.16406	-50.216	59.121	1386.2096	-1.5435	1.0886	-0.22451
0.37	26.366	4.885	45.83	-0.04541	0.083984	0.090332	59.27	104.803	269.4367	-0.08584	0.024023	0.065625	-147.3012	-52.815202	1473.3029	-1.4243	1.5259	-0.15918	-93.386	157.86	1012.196	-1.0049	0.70117	-0.040527	47.365	85.863	393.686	-0.24854	-0.0092773	-0.18652	35.692	121.735	901.118	-0.74951	0.4624	-0.1377	-3.093	56.391	1387.1	-1.5254	1.0828	-0.2166
0.372	61.7257	12.19336	27.57824	-0.050782	0.10181	0.082032	64.891332	145.951	256.19532	-0.086621	0.02334	0.074219	-123.73657	-53.047	1484.291	-1.3926	1.4824	-0.15674	-64.166	174.9283	1004.857	-0.97266	0.66016	-0.038574	74.841	35.7064	510.083	-0.34258	0.020508	-0.1793	5.094	172.4395	874.9113	-0.71582	0.43432	-0.12182	29.838	80.802	1349.2968	-1.5133	1.0684	-0.20918
0.374	25.039	12.9352	16.8712	-0.055176	0.12109	0.069824	57.2161	117.457	228.59031	-0.09082	0.023926	0.08252	-120.005	-15.272	1485.845	-1.3516	1.4141	-0.1543	-91.69	215.474	960.273	-0.94117	0.63305	-0.035644	88.632	73.773	652.051	-0.45547	0.062109	-0.16778	-15.988	159.8634	852.0871	-0.68555	0.40234	-0.097168	0.849000000000004	38.0812	1313.8584	-1.5005	1.0593	-0.19951
0.376	31.466	1.7252	29.3494	-0.060547	0.14014	0.049316	60.136	91.8038	223.231	-0.094629	0.021484	0.087988	-136.688	-11.804	1448.4716	-1.3332	1.3752	-0.14917	-93.631	154.4751	956.4374	-0.90576	0.60889	-0.032715	49.664	42.165	755.2585	-0.60039	0.1043	-0.15254	5.162	162.7068	854.0268	-0.63672	0.36914	-0.070313	44.042	71.5319	1308.628	-1.4805	1.0488	-0.18945
0.378	17.435	15.2554	34.665	-0.066895	0.14941	0.038086	36.747	173.301	177.1881	-0.098145	0.024707	0.09336	-85.05267	-28.494	1470.5211	-1.3198	1.3403	-0.14551	-116.031	186.835	933.498	-0.86865	0.57275	-0.03125	42.4794	3.173	862.812	-0.77949	0.16094	-0.13545	-62.1688	220.058	807.4643	-0.61475	0.35205	-0.055664	48.89	57.6896	1278.991	-1.4631	1.0314	-0.18007
0.38	-5.628	-13.0565	29.492	-0.076172	0.17529	0.019043	42.157	117.3433	162.067	-0.096973	0.029785	0.09883	-112.543795	19.3867	1450.3853	-1.3086	1.3027	-0.14648	-116.511	172.8915	897.062	-0.84863	0.55371	-0.03418	10.652	47.1833	947.4476	-0.98291	0.22803	-0.1167	-47.562	166.917	764.735	-0.56885	0.32275	-0.030273	27.258	9.792	1280.9622	-1.4403	1.0173	-0.17266
0.382	2.383	-51.2805	37.555	-0.091553	0.19141	0.01123	6.447	144.625	167.057	-0.10107	0.030664	0.10254	-111.7887	25.744	1423.943	-1.2988	1.2852	-0.14795	-79.0415	137.5235	908.7828	-0.7998	0.51953	-0.034668	-45.631	-12.934	1021.564	-1.2148	0.31104	-0.095411	-40.458	188.3638	720.7385	-0.53809	0.29663	-0.01416	48.865	34.1143	1256.3185	-1.4118	0.99813	-0.16875
0.384	-48.7611	-41.8138	44.504	-0.11279	0.20313	-0.01709	-16.437	162.981	136.814	-0.098633	0.033203	0.10742	-70.304	40.0888	1405.5946	-1.2651	1.2505	-0.14453	-76.3324	201.141	874.5267	-0.76196	0.49487	-0.032714	-60.5	13.766	1072.688	-1.4671	0.41533	-0.070507	-94.8599	191.397	667.2065	-0.50195	0.27051	0.00097656	7.009	21.5584	1228.4467	-1.3744	0.97832	-0.16123
0.386	-58.5618	-51.177	95.07603	-0.15918	0.22021	-0.040527	-32.421	87.0591	143.707	-0.092383	0.037305	0.11621	-96.5269	72.112	1360.791	-1.2419	1.2287	-0.14258	-34.471	156.914	858.411	-0.72705	0.46777	-0.033691	-63.346	12.4629	1072.9054	-1.73	0.53877	-0.043945	-80.0869	147.634	651.17598	-0.45752	0.24316	0.020996	-3.421	57.7452	1235.957	-1.3398	0.95508	-0.15625
0.388	-45.289	-28.7305	147.115	-0.18604	0.23193	-0.053711	-55.1976	138.403	115.2171	-0.089062	0.041797	0.11787	-68.4728	53.124	1373.039	-1.2183	1.2036	-0.14355	22.381	171.7156	853.146	-0.67139	0.43311	-0.038086	-126.924	-94.982	1087.741	-1.9843	0.68486	-0.029687	-92.3346	217.1363	603.96	-0.43457	0.22559	0.027832	-38.1356	105.061	1206.5096	-1.2998	0.92852	-0.15195
0.39	-122.72	-19.705	200.301	-0.26709	0.25586	-0.095215	-80.60501	96.1784	102.707	-0.080469	0.049219	0.11826	-48.506	70.04	1365.165	-1.1895	1.1797	-0.13867	33.6314	201.08	799.2207	-0.64404	0.40869	-0.043457	-173.768	-102.571	1123.68	-2.2183	0.84814	-0.015625	-122.491	188.779	568.207	-0.38965	0.19775	0.046387	-70.47478	68.9659	1177.2677	-1.2546	0.90225	-0.14952
0.392	-110.5245	-14.2979	280.623	-0.33838	0.27246	-0.12354	-95.3757	47.2382	88.5959	-0.069433	0.046387	0.11436	-22.466	68.2624	1316.541	-1.1772	1.1587	-0.13232	61.9031	146.6529	783.256	-0.57861	0.37549	-0.050781	-195.9293	-132.667	1119.392	-2.4048	1.0265	-0.027637	-101.577	173.1657	553.3113	-0.35474	0.1748	0.061524	-55.1313	102.3562	1157.68	-1.2159	0.86748	-0.14795
0.394	-119.1753	28.486	393.479	-0.42969	0.30078	-0.15283	-117.241	81.3281	53.087	-0.05957	0.047852	0.11963	23.006	56.1064	1306.6045	-1.1367	1.1289	-0.12891	78.8369	197.5827	754.828	-0.53613	0.34008	-0.05835	-188.116	-143.292	1107.643	-2.5335	1.2196	-0.044726	-144.867	218.395	498.834	-0.32373	0.15527	0.075684	-42.313	120.3889	1126.198	-1.1761	0.84141	-0.14688
0.396	-130.965	51.158	532.444	-0.57764	0.35986	-0.17285	-101.207	1.82100000000001	56.105	-0.055469	0.046093	0.12119	6.112	102.562	1259.051	-1.1045	1.084	-0.12695	63.6854	182.297	698.21801	-0.48682	0.30713	-0.060059	-163.712	-56.29	1042.219	-2.571	1.4243	-0.045898	-122.904	170.3626	479.11	-0.28223	0.12158	0.083008	-62.68658	120.003	1134.466	-1.1387	0.80859	-0.14453
0.398	-96.9512	49.5091	658.737	-0.67041	0.39209	-0.17822	-101.573	24.335	62.6069	-0.045703	0.044043	0.1248	18.257	67.698	1231.755	-1.082	1.0645	-0.12598	63.62289	140.221	674.7587	-0.43164	0.26758	-0.067383	-172.836	-79.303	981.5594	-2.5411	1.6274	-0.021582	-81.1143	224.467	449.053	-0.26855	0.10889	0.088867	-42.385	181.2001	1107.4458	-1.1007	0.78369	-0.14199
0.4	-134.963	28.5629	717.414	-0.88232	0.49072	-0.19531	-121.056	58.2549	51.5529	-0.03789	0.03623	0.12363	73.097	41.363	1238.5557	-1.041	1.0273	-0.12744	46.3953	200.0208	620.4262	-0.4043	0.24561	-0.073242	-161.735	-30.806	997.4339	-2.4746	1.7695	-0.023438	-85.619	240.926	404.344	-0.23975	0.077637	0.09375	-88.47	181.572	1066.8856	-1.0738	0.75938	-0.13887
0.402	-108.1819	-24.2391	826.03	-1.0635	0.58056	-0.19995	-97.751	-5.152	67.487	-0.031738	0.032324	0.1249	16.447	70.616	1198.1904	-1.0076	0.9944	-0.12671	42.6535	159.6757	600.3382	-0.3501	0.20459	-0.075684	-161.363	27.168	975.931	-2.3521	1.7761	-0.099318	-28.476	176.346	405.822	-0.21411	0.060546	0.10058	-66.3436	179.431	1040.54229	-1.048	0.73359	-0.13379
0.404	-59.612	-44.159	943.8065	-1.252	0.68164	-0.19775	-112.631	58.8362	50.0669	-0.026367	0.025391	0.12549	18.553	47.092	1205.411	-0.97412	0.95947	-0.12549	42.5646	196.952	593.212	-0.31396	0.16919	-0.078125	-164.22	-6.536	989.2565	-2.1656	1.6703	-0.20293	-33.0211	220.679	385.983	-0.19434	0.042969	0.10449	-58.59	196.987	1008.68	-1.0291	0.71387	-0.13203
0.406	-71.0514	-27.73	1017.688	-1.5137	0.83594	-0.19727	-100.58	26.2603	36.3445	-0.026563	0.017871	0.13164	16.147	100.9728	1183.786	-0.92773	0.91406	-0.12109	39.0151	256.252	537.0684	-0.28516	0.14111	-0.081055	-146.514	11.001	981.5012	-1.8937	1.4782	-0.27949	-18.3423	168.206	370.36784	-0.16455	0.024414	0.10547	-116.37	153.0563	984.788	-1.0039	0.69434	-0.12695
0.408	-20.3135	-43.273	1069.779	-1.6401	0.92432	-0.18311	-77.4955	-16.3586	35.2049	-0.02627	0.010156	0.13154	-47.047	146.335	1127.8906	-0.91016	0.89063	-0.11963	34.78	188.761	523.8791	-0.23975	0.10547	-0.084961	-154.065	-32.381	947.077	-1.6075	1.2288	-0.31572	34.539	146.0426	377.374	-0.15039	0.0061035	0.11011	-64.998	163.28	973.798	-0.98975	0.6709	-0.12031
0.41	-7.4591	-56.955	1030.336	-1.8633	1.0977	-0.17773	-59.4132	36.2588	15.23	-0.02627	0.0046875	0.13271	-23.341	128.609	1110.4987	-0.87109	0.84961	-0.11914	19.436	215.572	493.328	-0.22266	0.08252	-0.089844	-149.68	-86.899	961.2797	-1.3691	0.98438	-0.3501	8.013	197.444	347.86	-0.1333	-0.0068359	0.11133	-106.612	165.5113	942.139	-0.97304	0.65586	-0.11553
0.412	10.911	-89.623	1042.699	-2.0008	1.2195	-0.16968	-42.95729	-22.4228	19.3314	-0.022852	0.0016602	0.13584	-18.928	181.818	1060.331	-0.83398	0.81787	-0.11596	3.484	170.1247	462.238	-0.1875	0.055664	-0.094727	-111.0925	-54.296	962.197	-1.1941	0.77763	-0.37725	32.425	129.0701	332.808	-0.11816	-0.020508	0.11279	-100.018	147.038	947.83242	-0.94453	0.63359	-0.1124
0.414	91.1295	-101.118	1073.474	-2.1094	1.3438	-0.17773	-18.547	7.6481	36.5702	-0.025391	-0.0073242	0.14111	-17.533	155.0064	1029.9057	-0.8042	0.78955	-0.11719	2.268	118.686	453.36656	-0.16089	0.036865	-0.095215	-91.9043	-119.381	962.05	-1.0789	0.63574	-0.40996	50.609	158.583	286.1595	-0.11377	-0.024902	0.11621	-30.438	179.551	948.2275	-0.91534	0.61963	-0.10752
0.416	74.1154	-90.6543	1051.312	-2.1602	1.4844	-0.18799	7.844	37.6247	12.8745	-0.023145	-0.012012	0.13691	3.204	139.2778	1031.4234	-0.76611	0.75342	-0.10791	1.058	170.594	410.7373	-0.14063	0.017578	-0.10254	-51.182	-156.0735	1002.048	-1.0051	0.55957	-0.44981	39.5352	153.14	242.287	-0.10645	-0.029785	0.11475	-33.3332	183.7694	937.344	-0.88428	0.59912	-0.10742
0.418	97.661	-115.0575	1068	-2.1152	1.5449	-0.19018	27.115	-24.0237	19.3792	-0.018653	-0.018457	0.13535	-35.2805	189.8084	993.276	-0.75	0.73535	-0.10889	-43.4542	97.609	391.869	-0.11523	-0.0043945	-0.10205	-27.6972	-186.824	1036.9392	-0.95176	0.50976	-0.48125	71.2391	74.1498	237.9383	-0.10327	-0.029541	0.12207	31.66374	176.4931	924.866	-0.84873	0.58174	-0.10312
0.42	160.887	-113.346	1048.275	-2.0132	1.5669	-0.18896	50.225	52.596	5.5265	-0.010449	-0.023926	0.1334	-54.0615	142.706	985.912	-0.7124	0.70166	-0.10303	-63.2392	128.6503	362.693	-0.10205	-0.01416	-0.11084	-12.74	-280.587	1066.386	-0.91211	0.48047	-0.50293	41.3847	130.863	224.290333	-0.097168	-0.030762	0.12256	44.5093	199.561	884.643	-0.81553	0.56514	-0.098047
0.422	118.396	-105.7913	1019.548	-1.8022	1.5103	-0.17139	55.9219	23.8832	3.0931	0.0010742	-0.038867	0.13467	-34.638	182.9369	954.671	-0.68237	0.67138	-0.10303	-68.356	167.3752	303.0459	-0.077637	-0.029785	-0.11475	40.735	-262.769	1111.1	-0.87959	0.4585	-0.5208	59.0646	93.3008	222.646	-0.09375	-0.023438	0.12744	23.871	177.3178	849.288	-0.77373	0.54756	-0.1
0.424	134.381	-73.852	1031.666	-1.6968	1.4497	-0.16895	60.8391	-14.4676	19.7661	0.015625	-0.04834	0.12793	-71.888	201.16483	910.025	-0.6543	0.64941	-0.10059	-69.143	109.7008	289.128	-0.059326	-0.042968	-0.11865	58.9386	-239.272	1165.722	-0.85107	0.42998	-0.54424	62.7015	102.595	224.565	-0.087891	-0.018066	0.12305	79.035	173.9761	821.1281	-0.73994	0.5251	-0.09844
0.426	135.483	-18.58	1000.92	-1.4912	1.332	-0.15869	57.3189	42.28	16.033	0.035742	-0.061328	0.12578	-61.6629	154.848	899.7581	-0.61182	0.61377	-0.096191	-84.546	165.3563	275.2456	-0.041016	-0.049316	-0.11816	71.023	-242.285	1232.06	-0.81709	0.40264	-0.56182	9.08	168.032	186.2667	-0.084961	-0.0083008	0.13574	76.208	165.756	777.3974	-0.69727	0.50586	-0.094727
0.428	82.408	-27.5	1021.8653	-1.3823	1.2642	-0.12867	66.5245	-27.168	8.4726	0.053222	-0.074219	0.12383	-87.309	210.392	845.738	-0.59326	0.6001	-0.091309	-92.831	110.2567	254.23	-0.020508	-0.062012	-0.12939	95.48	-151.966	1253.4	-0.78184	0.37617	-0.5791	30.008	101.646	174.305	-0.081299	-0.003418	0.13721	61.0611	126.888	736.4024	-0.66543	0.48906	-0.094043
0.43	51.3636	-50.884	1035.902	-1.3159	1.2114	-0.097168	65.2585	-12.7502	9.4802	0.070019	-0.089453	0.11836	-88.293	170.2274	830.1069	-0.5459	0.56152	-0.088867	-82.492	63.436	252.00801	-0.0092773	-0.067383	-0.12939	67.981	-164.563	1271.921	-0.74805	0.34375	-0.58789	21.949	125.656	155.468	-0.080566	0.0087891	0.14063	96.649	147.2904	709.77621	-0.62812	0.46894	-0.094531
0.432	-34.709	-86.553	987.974	-1.293	1.1777	-0.03418	49.14	29.686	5.4094	0.088672	-0.10683	0.11211	-52.5483	170.3504	855.235	-0.51245	0.53149	-0.09082	-77.188	123.8023	222.5829	0.0092773	-0.078613	-0.13721	59.58365	-151.6143	1317.368	-0.72236	0.31064	-0.58057	-19.185	138.668	104.9099	-0.071777	0.018555	0.14258	32.8901	174.305	682.0331	-0.58907	0.44746	-0.094531
0.434	-30.664	-153.581	1008.474	-1.292	1.1719	-0.010742	32.899	-7.6926	21.1914	0.11133	-0.12256	0.10352	-54.538	222.084	822.6987	-0.47754	0.50293	-0.087402	-51.8963	74.472	194.5622	0.019532	-0.085205	-0.13916	51.7863	-121.71	1339.854	-0.7207	0.28037	-0.57129	-19.572	70.6118	110.5873	-0.070801	0.027344	0.14014	70.546	197.161	663.175	-0.55508	0.42676	-0.089648
0.436	18.674	-172.587	1000.845	-1.2729	1.1626	-0.0053711	4.8	74.294	30.478	0.12764	-0.13692	0.10127	-15.198	148.912	802.7661	-0.42773	0.46289	-0.092773	-34.826	113.31637	170.642	0.029785	-0.093262	-0.13818	23.649	-165.77157	1350.27213	-0.74844	0.26826	-0.55254	-36.5378	120.07	82.853	-0.062988	0.032715	0.13525	67.249	219.967	633.569	-0.51367	0.4043	-0.09375
0.438	-1.212	-213.3735	1018.2094	-1.2305	1.1602	-0.0034179	-3.941	54.18	15.71	0.15029	-0.15156	0.099121	9.735	181.40237	764.3962	-0.40186	0.44385	-0.090332	-22.164	151.451	118.6635	0.038574	-0.10254	-0.14355	30.358	-123.692	1378.319	-0.81387	0.26455	-0.53066	-75.093	45.398	89.4121	-0.056396	0.040528	0.13183	26.176	184.807	609.8017	-0.475	0.38174	-0.095703
0.44	12.568	-260.36	1072.102	-1.168	1.1621	0.003418	-26.643	11.8047	29.548	0.16982	-0.16328	0.098731	1.335	201.23433	721.17415	-0.35352	0.40088	-0.09082	-13.929	81.7788	96.8474	0.043701	-0.10767	-0.13989	6.866	-94.53	1355.77	-0.90234	0.28125	-0.49414	-79.669317	15.398	92.1338	-0.047852	0.04248	0.12988	63.9432	153.1052	585.9711	-0.43281	0.35996	-0.09502
0.442	14.777	-285.028	1070.7022	-1.0703	1.168	0.0063477	-48.8171	55.15	16.622	0.18457	-0.17891	0.092969	34.8233	168.3272	717.847	-0.32569	0.37158	-0.088867	8.635	132.312	95.634	0.044922	-0.10693	-0.14795	-0.407	-126.824	1403.933	-1.0413	0.34472	-0.4499	-90.6474	67.9596	52.9227	-0.034668	0.047852	0.12939	12.959	141.065	542.851	-0.39023	0.33379	-0.09541
0.444	-58.526	-332.259	1103.983	-1.0254	1.1641	0.014648	-62.506	-6.6222	6.146	0.19971	-0.1792	0.089844	42.953	228.219	671.605	-0.29883	0.34131	-0.088867	17.8206	85.4469	97.0438	0.041992	-0.10986	-0.13672	-40.6843	-77.021	1433.65	-1.2078	0.43516	-0.4045	-86.464	-6.797	58.439	-0.03418	0.049805	0.12598	28.289	124.536	525.9012	-0.34736	0.30976	-0.096484
0.446	-51.28642	-319.827	1156.167	-0.95459	1.1489	0.038086	-84.9092	17.7161	6.839	0.2126	-0.18652	0.090918	42.897	166.5517	616.677	-0.26904	0.3042	-0.084961	30.544	33.1325	107.9288	0.035156	-0.10791	-0.13574	-67.3899	-113.2339	1462.471	-1.3903	0.55117	-0.36504	-93.235	28.5557	44.9224	-0.023926	0.046387	0.125	30.8231	128.583	494.698	-0.31152	0.28613	-0.094727
0.448	-82.9243	-293.878	1203.7907	-0.92773	1.1255	0.050781	-92.311	68.855	-21.6023	0.22148	-0.18848	0.089844	51.3818	143.25626	595.511	-0.25342	0.2876	-0.08252	42.4455	82.007	78.5886	0.023438	-0.10547	-0.13086	-58.455	-132.234	1526.748	-1.5718	0.69443	-0.33007	-120.89	32.235	27.1409	-0.017578	0.041016	0.125	-37.2312	135.694	453.7388	-0.27344	0.26435	-0.098145
0.45	-109.1083	-271.016	1257.005	-0.91162	1.0903	0.043945	-92.847	20.7782	7.2452	0.22617	-0.19199	0.087109	9.538	174.045	541.834	-0.23145	0.25146	-0.07666	52.0093	22.9074	59.2211	0.013428	-0.096191	-0.12231	-97.095	-100.073	1529.204	-1.7402	0.84375	-0.30371	-82.0722	-28.1763	27.6484	-0.0087891	0.037109	0.125	-31.2686	121.475	429.157	-0.23701	0.24033	-0.098536
0.452	-99.592	-205.036	1252.6123	-0.91943	1.0415	0.0053711	-84.4842	74.84	15.8263	0.22442	-0.18838	0.084668	37.9841	122.793	536.787	-0.21729	0.23072	-0.072998	54.9449	66.071	61.3223	-0.0048828	-0.091797	-0.12012	-118.919	-158.361	1537.366	-1.8778	0.99288	-0.3124	-69.8829	42.033	-0.104000000000003	0.0073242	0.022461	0.12988	-46.9062	143.984	385.6351	-0.20185	0.21377	-0.096192
0.454	-165.48	-185.1114	1261.8694	-0.93457	1.0166	-0.019043	-102.698	51.9859	2.8888	0.22217	-0.18555	0.084473	42.3628	179.498	529.9809	-0.19678	0.21045	-0.071777	63.7128	96.826	47.273	-0.024902	-0.07666	-0.10596	-113.001	-135.248	1570.033	-1.9734	1.1227	-0.32978	-71.758	3.632	9.7605	0.015625	0.012695	0.12842	-97.295	149.8021	370.7598	-0.16895	0.1915	-0.099707
0.456	-145.304	-181.448	1307.4632	-0.95947	0.98779	-0.081055	-99.507	20.5798	36.526	0.21074	-0.17363	0.084277	28.187	180.218	486.8154	-0.17627	0.18262	-0.070313	50.528	28.6373	54.839	-0.037598	-0.071289	-0.10254	-141.412	-121.788	1547.1682	-2.0324	1.2223	-0.36182	-44.782	-0.710000000000001	20.7648	0.036621	-0.0029297	0.12988	-70.871	124.2839	350.6283	-0.13867	0.16797	-0.10059
0.458	-102.954	-134.633	1320.44213	-0.98169	0.96704	-0.11279	-104.138	71.857	42.27287	0.19629	-0.15986	0.088476	56.8648	121.948	475.65	-0.16113	0.17285	-0.065918	63.5392	76.542	58.462	-0.065918	-0.054199	-0.089355	-108.558	-154.978	1560.104	-2.0573	1.2716	-0.40478	-31.269	61.1438	5.203	0.055176	-0.017334	0.12719	-91.835	129.3273	317.497	-0.11289	0.14385	-0.10411
0.46	-87.527	-151.185	1341.61412	-1.0078	0.95215	-0.12891	-114.946	13.2933	42.52854	0.17871	-0.14424	0.086914	45.7873	182.824	420.8281	-0.14258	0.15088	-0.064941	44.04792	36.5889	35.2513	-0.079345	-0.043457	-0.077149	-79.695	-89.992	1552.4967	-2.0776	1.2837	-0.43896	-11.377	12.2917	10.5738	0.074219	-0.035645	0.12988	-94.139	94.19	297.1032	-0.091406	0.12393	-0.10996
0.462	-9.343	-134.34	1367.765	-1.0645	0.9375	-0.16406	-78.7318	22.4087	49.5189	0.15527	-0.12129	0.086719	36.726	129.499	379.0131	-0.12231	0.1333	-0.063721	34.221	10.495	36.48115	-0.096191	-0.026367	-0.0625	-102.05	-93.595	1528.313	-2.1193	1.2748	-0.44434	1.368	56.041	10.6593	0.10498	-0.059082	0.12256	-32.3687	93.7533	275.39	-0.067188	0.10362	-0.1084
0.464	-24.342	-130.508	1375.819	-1.0918	0.94141	-0.17529	-53.3241	45.8916	18.1433	0.1333	-0.10156	0.088379	41.5221	129.4414	363.0922	-0.1084	0.12061	-0.070801	20.471	68.7904	20.02	-0.11426	-0.020508	-0.05127	-72.119	-73.422	1542.8799	-2.1897	1.2536	-0.43594	4.531	61.356	7.2219	0.11719	-0.068848	0.12305	-85.499	120.00948	227.391	-0.042871	0.081347	-0.11397
0.466	-19.951	-161.553	1397.285	-1.1479	0.95557	-0.20654	-53.98436	-13.7467	29.9735	0.11191	-0.072461	0.083691	-4.456	153.8544	330.12662	-0.089844	0.10449	-0.066406	8.735	20.291	1.556	-0.11768	-0.0092773	-0.046387	-54.0354	-12.4313	1527.823	-2.2901	1.2485	-0.42774	26.943	-21.514	21.6269	0.14551	-0.09668	0.11572	-39.981	123.2541	218.64968	-0.015137	0.061035	-0.11475
0.468	13.825	-130.485	1439.5967	-1.1963	0.96582	-0.23169	-30.84	37.6788	34.89279	0.086719	-0.047363	0.087793	-19.935	60.351	314.9074	-0.08252	0.095215	-0.064941	-9.635	51.3	19.5493	-0.12451	0.0053711	-0.033691	-24.5324	-47.462	1528.564	-2.4218	1.2771	-0.41728	28.399	43.356	-18.864	0.16773	-0.11328	0.11645	-21.774	157.161	178	0.0041993	0.039551	-0.11651
0.47	-8.26	-138.958	1455.414	-1.2534	0.98486	-0.2627	-4.367	20.4953	35.666	0.068359	-0.022363	0.088184	-30.273	107.039	292.9917	-0.072754	0.081055	-0.069824	-32.0522	67.006	15.1306	-0.12964	0.01123	-0.024658	14.623	-21.3367	1551.6668	-2.5737	1.356	-0.41846	37.9977	14.8892	-24.94301	0.18262	-0.1333	0.11426	-55.6446	153.146	157.8727	0.024902	0.019824	-0.12051
0.472	13.934	-155.394	1505.656	-1.3496	1.0303	-0.30957	19.741	8.1284	46.916	0.046778	0.0067381	0.087598	-40.4639	110.144	251.667	-0.070557	0.067627	-0.069824	-64.0768	10.56828	29.034	-0.12695	0.02002	-0.01416	42.218	15.73079	1522.536	-2.6806	1.4812	-0.38994	67.7895	1.47521	7.3398	0.20313	-0.15479	0.10986	14.006	111.141	158.13619	0.04834	-9.776e-05	-0.12715
0.474	37.998	-131.9131	1524.618	-1.4077	1.0649	-0.33154	38.4132	61.671	33.5592	0.027344	0.034668	0.091309	-35.3143	70.261	258.7185	-0.067383	0.057129	-0.076172	-76.38436	61.625	31.8715	-0.12549	0.03125	-0.0024414	49.538	-14.012	1539.426	-2.7664	1.5988	-0.37383	45.3639	46.297	3.455	0.21631	-0.16699	0.11328	-23.1609	107.668	130.843	0.071094	-0.021289	-0.13008
0.476	4.251	-170.1446	1532.929	-1.5625	1.1543	-0.35938	61.23933	5.914	43.6336	0.0052736	0.058984	0.089063	-52.18522	149.562	233.5347	-0.063477	0.050293	-0.074219	-69.419301	43.4082	23.7443	-0.12646	0.031738	0	58.541	61.335	1565.19	-2.943	1.7176	-0.46524	71.2917	-16.6549	29.5813	0.23047	-0.18994	0.11523	5.46	67.22	141.605181	0.09375	-0.044922	-0.13379
0.478	43.893	-155.933	1579.986	-1.7156	1.2532	-0.36157	52.408	10.2159	62.616	-0.0098634	0.084961	0.087695	-79.273	96.409	189.6078	-0.066895	0.04248	-0.076172	-93.498	23.494	37.5326	-0.11475	0.03418	0.010742	62.456	60.231	1580.387478	-2.9612	1.8434	-0.52451	61.75181	37.146	23.373	0.23852	-0.19995	0.11694	60.1364	60.0757	129.31276	0.11289	-0.066015	-0.13545
0.48	62.609	-131.209	1550.18	-1.8887	1.375	-0.36328	70.33544	37.407	30.6538	-0.031348	0.10918	0.088477	-52.9689	90.487	159.6983	-0.059082	0.041016	-0.08252	-87.168	68.8427	30.395	-0.10815	0.03418	0.012452	78.044	34.5685	1600.124	-2.8359	1.8848	-0.51855	21.3423	61.367	20.7281	0.24072	-0.21338	0.12305	32.5306	83.784	102.69788	0.13174	-0.083691	-0.13701
0.482	40.359	-155.1007	1567.704	-2.1504	1.5762	-0.3623	53.2472	-9.00313	42.32	-0.047949	0.13408	0.089062	-52.2257	106.049	136.765	-0.049805	0.035645	-0.087402	-90.514	-7.214	11.612	-0.091309	0.028809	0.01416	97.134	62.364	1581.6906	-2.6427	1.8296	-0.49267	37.102	2.7186	52.589	0.24707	-0.22119	0.12402	70.6844	71.2588	94.7943	0.14659	-0.10205	-0.14365
0.484	46.9447	-106.2226	1560.9157	-2.2793	1.6855	-0.36377	60.8802	36.896	47.494	-0.067383	0.15869	0.088379	-70.2583	27.802	152.836	-0.04248	0.031738	-0.096191	-95.383	0.113999999999997	35.0601	-0.072266	0.012207	0.020508	103.991	-10.744	1589.715	-2.4195	1.72	-0.4749	3.973	72.81	35.2106	0.25	-0.22656	0.12598	57.8303	97.327	76.5575	0.15996	-0.12617	-0.14072
0.486	29.662	-104.1598	1518.907	-2.5	1.9063	-0.35449	44.9821	20.0575	32.386	-0.089453	0.17998	0.083887	-36.708	84.537	147.636	-0.023438	0.030762	-0.097656	-80.456	29.672	30.0213	-0.062012	0.0029297	0.020996	128.332	-2.0157	1607.814	-2.2151	1.5649	-0.4706	-12.883	42.2828	11.9339	0.24609	-0.22705	0.12793	35.0836	99.832	68.5444	0.16992	-0.14258	-0.14258
0.488	49.814	-97.561	1522.175	-2.5981	2.0425	-0.32349	7.326	-20.7845	39.498	-0.10928	0.19834	0.07959	-33.57885	91.819	109.632	-0.013184	0.025879	-0.099609	-88.967	-7.06479	41.374	-0.044922	-0.013184	0.020508	112.865	9.7542	1583.5683	-2.0631	1.4119	-0.47363	-11.083	10.09269	18.9374	0.23876	-0.22778	0.13379	99.784	60.7502	85.999	0.1709	-0.15742	-0.14082
0.49	29.981	-31.4948	1510.376	-2.4604	2.1548	-0.18652	10.43	18.9909	57.265367	-0.12959	0.2167	0.07373	-27.0894	53.565	100.3244	0.0078125	0.026855	-0.10645	-58.3369	51.783	47.707	-0.032715	-0.028564	0.014648	88.545	-29.9588	1588.733	-1.959	1.2793	-0.46777	-46.6313	69.107	9.569	0.22852	-0.2251	0.13477	50.0926	85.893	63.26722	0.17393	-0.16826	-0.13828
0.492	-60.743	-48.9308	1541.051	-2.6543	2.1328	-0.30713	-3.357	-58.812	54.301	-0.14971	0.23291	0.052246	-40.8957	123.438	77.38	0.019776	0.01416	-0.10474	-45.977	34.847	21.3969	-0.018555	-0.047363	0.022461	71.646	40.291	1560.5129	-1.8963	1.1617	-0.4502	-64.9239	2.7404	30.50384	0.21289	-0.21289	0.13916	46.3771	61.985	63.237	0.17198	-0.18076	-0.13867
0.494	-34.077	-23.8532	1558.9593	-2.7085	2.1782	-0.39795	-29.038	-74.6173	97.7323	-0.16602	0.24658	0.035645	-18.9463	70.34934	70.932	0.035645	0.012695	-0.10254	-53.1019	2.7218	36.6713	-0.0039063	-0.066895	0.0087891	49.8253	46.513	1529.666	-1.8645	1.0711	-0.42969	-69.5869	45.979	23.351	0.20166	-0.20508	0.14502	61.144	43.8879	57.996	0.16279	-0.18643	-0.13067
0.496	-93.2305	-2.473	1525.587	-2.5132	2.1958	-0.37305	-32.956	-40.3173	85.22	-0.18506	0.2583	0.020996	21.047	72.777	55.8111	0.04541	0.0024414	-0.099121	-25.109	52.233	36.778	0.0024414	-0.079102	0.0029297	38.8064	68.736	1551.123	-1.8508	1.0043	-0.40859	-89.808	70.273	2.784	0.17578	-0.18359	0.15137	-18.201	68.0793	27.63	0.15186	-0.18604	-0.12891
0.498	-138.62	-37.114	1550.728	-2.3347	2.0715	-0.28515	-68.3406	-87.956	111.78	-0.2082	0.27324	0.0099607	27.455	106.204	32.1176	0.05127	0.0024414	-0.10205	-4.899	-13.1858	38.3791	0.01709	-0.096191	-0.0029297	-0.940000000000001	154.328	1563.66	-1.8547	0.96055	-0.39697	-78.072	-5.84031	33.1773	0.15723	-0.16821	0.15381	1.029	53.5693	36.7586	0.12979	-0.18721	-0.12129
0.5	-99.0458	0.376000000000005	1569.329	-2.1909	1.9399	-0.23779	-79.232	-47.783	182.785	-0.23789	0.28653	-0.0072266	32.4779	14.5113	46.0232	0.059082	-0.0063477	-0.098633	14.007	6.6018	51.268	0.030518	-0.11084	-0.010498	-17.511	133.166	1565.985	-1.8511	0.93604	-0.39063	-86.8524	45.328	30.7942	0.13086	-0.14258	0.15674	-14.944	66.692	25.1417	0.10752	-0.18359	-0.1128
0.502	-138.6195	-7.699	1564.573	-2.0254	1.791	-0.23633	-139.3491	-59.6571	239.665	-0.28017	0.28975	-0.029785	30.859	43.1067	49.267	0.061524	-0.010498	-0.091552	19.629	32.99	26.6316	0.039063	-0.12109	-0.016113	-31.3712	154.507	1554.453	-1.8354	0.92559	-0.37969	-95.86	1.412	25.9594	0.1001	-0.10352	0.15674	-59.6814	67.827	37.3246	0.081347	-0.17695	-0.099902
0.504	-163.37	-21.541	1575.8219	-1.9468	1.7251	-0.22998	-130.9992	-60.368	346.504	-0.33643	0.29004	-0.066406	33.0025	46.3186	31.759	0.05957	-0.021484	-0.082031	24.482	-1.5202	6.477	0.046875	-0.13574	-0.025391	-66.104	165.758	1481.5469	-1.8008	0.91758	-0.37852	-83.0105	-7.7726	29.3004	0.080078	-0.084961	0.15918	-35.563	34.62	60.5426	0.049903	-0.16563	-0.091113
0.506	-161.83	-10.918	1550.959	-1.8101	1.6021	-0.21777	-94.981	36.7482	478.965	-0.40996	0.29375	-0.10537	42.0499	25.1451	40.7344	0.050293	-0.021484	-0.065918	47.049	50.957	12.9781	0.054688	-0.13818	-0.033203	-95.544	110.6599	1468.6697	-1.7511	0.91953	-0.375	-78.738	61.3383	21.8123	0.04834	-0.038086	0.15479	-75.3354	48.177	51.4684	0.019531	-0.15039	-0.081543
0.508	-170.401	-65.559	1557.0186	-1.7458	1.5061	-0.19214	-153.078	21.909	620.985	-0.49375	0.30498	-0.13711	42.987	100.088	28.4562	0.04541	-0.019531	-0.058105	57.8264	25.4243	15.1079	0.05957	-0.14453	-0.044922	-86.749	150.0982	1450.989	-1.6939	0.9206	-0.37119	-66.4859	-15.4953	48.733	0.023682	-0.0061034	0.15552	-89.014	15.361	64.799	-0.0054686	-0.13379	-0.06709
0.51	-110.9051	-70.133	1577.676	-1.6968	1.4263	-0.17139	-156.956	6.056	768.095	-0.59961	0.32881	-0.16094	20.162	37.138	26.5468	0.029297	-0.022461	-0.04248	47.9146	-10.5923	30.6131	0.068848	-0.14746	-0.050537	-98.823	138.8712	1407.416	-1.6284	0.91162	-0.36572	-67.4112	8.054	52.844	0.0019531	0.029785	0.15186	-55.1834	4.022	47.9935	-0.029687	-0.11914	-0.056348
0.512	-126.2427	-56.5204	1554.365	-1.6421	1.353	-0.16553	-132.932	-0.9719	833.484	-0.74141	0.37451	-0.17734	32.626	39.363	34.572	0.016602	-0.020019	-0.028564	58.697	29.228	29.5337	0.07666	-0.14795	-0.055176	-106.159	113.584	1413.8978	-1.5644	0.9002	-0.35976	-34.909	26.89779	27.8964	-0.023926	0.068848	0.15283	-120.913	13.113	26.8877	-0.047656	-0.10312	-0.047754
0.514	-144.297	-72.205	1544.849	-1.6177	1.3286	-0.16504	-121.6174	-89.9633	906.349	-0.90576	0.42822	-0.19824	27.874	73.973	-7.9719	0.0043945	-0.018555	-0.0083008	30.2271	-21.5783	30.2219	0.082031	-0.14697	-0.065918	-98.053	144.03658	1391.5563	-1.5074	0.88789	-0.35078	-7.307	-37.239	36.222	-0.035156	0.086426	0.15332	-85.2053	-15.557	24.9359	-0.061425	-0.083984	-0.040527
0.516	-101.0458	-20.48823	1530.9281	-1.564	1.2837	-0.1626	-94.382	-51	1002.02	-1.0974	0.49053	-0.21211	7.626	-6.956	7.8363	-0.012695	-0.013672	0.0024414	32.651	-10.7615	46.304	0.086426	-0.14551	-0.07373	-129.041	71.249	1374.6486	-1.4602	0.86953	-0.34102	-13.433	34.063	32.1979	-0.056641	0.12256	0.14844	-87.5669	0.3744	28.244	-0.068359	-0.073242	-0.035645
0.518	-143.162	0.5824	1496.553	-1.5293	1.25	-0.16407	-89.02	-27.827	1051.855	-1.2968	0.57168	-0.22998	7.624	32.9267	34.5042	-0.015137	-0.0097656	0.01416	21.834	18.7621	15.5189	0.081055	-0.13574	-0.074219	-95.215	104.281	1350.3598	-1.4216	0.84854	-0.33116	7.094	-6.6386	30.0795	-0.071533	0.15088	0.14844	-98.78	25.4698	27.3528	-0.075391	-0.062305	-0.029395
0.52	-106.4274	7.87608	1509.125	-1.4995	1.2192	-0.16113	-76.099	-61.323	1070.847	-1.4999	0.67402	-0.23467	-14.011	31.56171	29.245	-0.023438	-0.0073242	0.029785	-25.041	-11.6808	3.8068	0.081055	-0.13208	-0.084229	-107.659	128.329	1291.0585	-1.3906	0.8252	-0.32324	29.924	-20.3405	24.5023	-0.085449	0.17627	0.1416	-59.3267	-11.27128	51.807	-0.075782	-0.05459	-0.026074
0.522	-56.658	64.346	1502.64	-1.4658	1.1787	-0.15137	-29.531	-56.113	1042.103	-1.6947	0.78613	-0.23574	-28.453	-0.323	40.2375	-0.019043	-0.0041504	0.034912	-8.883	30.811	7.0233	0.075684	-0.12109	-0.092285	-95.5348	99.434	1285.2887	-1.3526	0.79531	-0.31367	29.366	41.441	-6.6822	-0.12012	0.20605	0.13867	-84.556	22.528089	35.799	-0.074218	-0.047168	-0.021387
0.524	-89.992	56.98	1490.079	-1.4526	1.1626	-0.146	21.046	-128.935	1035.5	-1.8823	0.90674	-0.23486	-25.979	72.338	25.1538	-0.013672	-0.0063477	0.04248	-38.0042	18.7523	-8.0787	0.071289	-0.104	-0.10303	-50.666	166.9963	1239.7677	-1.3175	0.77373	-0.30615	33.795	-15.2808	8.2208	-0.13867	0.21973	0.13281	-48.51627	0.553000000000001	44.0321	-0.074316	-0.039746	-0.019043
0.526	-50.372	77.079	1462.5486	-1.4316	1.125	-0.13721	82.1521	-136.597	1068.818	-2.0577	1.0376	-0.24326	-56.59	28.481	28.3347	-0.0053711	-0.0087891	0.044434	-51.5447	-14.54118	32.6371	0.067383	-0.099609	-0.11035	-50.581	156.627	1197.191	-1.2788	0.74522	-0.29795	62.7409	23.227	32.476	-0.17139	0.24561	0.11523	-17.658	-3.6327	46.40826	-0.075684	-0.035156	-0.020996
0.528	-72.594	94.777	1420.013	-1.418	1.0928	-0.12964	114.253	-83.863	1066.118	-2.1999	1.1735	-0.24571	-62.4922	33.631	46.906	-0.0014648	-0.015137	0.04834	-42.112	33.1689	26.7946	0.066406	-0.076172	-0.11865	-16.507	160.9647	1191.5858	-1.2417	0.7251	-0.29131	40.5744	41.073	40.3595	-0.19604	0.26758	0.097899	-55.82295	29.9436	3.122	-0.076758	-0.029004	-0.018946
0.53	-46.53	64.9005	1391.765	-1.3999	1.061	-0.125	121.589	-127.917	1059.709	-2.2714	1.3177	-0.23399	-60.9249	59.464	30.2447	0.0058594	-0.03125	0.046387	-65.6923	-5.0541	7.69	0.065186	-0.067382	-0.12793	16.968	221.634	1161.2594	-1.1987	0.69971	-0.27881	57.4702	-46.1707	73.559	-0.22412	0.2876	0.09082	16.011	-3.3235	23.0322	-0.07705	-0.023633	-0.015625
0.532	34.192	79.7198	1359.881	-1.3745	1.0259	-0.12158	126.15	-87.871	1029.009	-2.27	1.4288	-0.21699	-74.2834	-19.9677	15.2113	0.015381	-0.043946	0.044678	-70.4827	28.9561	9.9027	0.064941	-0.058105	-0.13525	21.021	198.418	1163.82	-1.1525	0.67725	-0.26768	35.4713	-13.699	76.433987	-0.271	0.31982	0.071289	29.881	24.3302	-0.077	-0.079394	-0.019726	-0.015625
0.534	-2.2	57.35696	1328.033	-1.3613	1.0059	-0.10596	128.653	-60.819	978.2701	-2.209	1.5039	-0.20166	-64.4586	12.29	25.8007	0.014648	-0.055176	0.043457	-68.9454	65.428	-0.979000000000001	0.061035	-0.044434	-0.14258	33.658	240.726	1113.69	-1.1096	0.65166	-0.25615	17.4	-68.3724	86.4667	-0.29834	0.33008	0.063477	6.173	35.786	-1.6097	-0.074414	-0.022363	-0.016504
0.536	23.837	28.719	1344.4145	-1.3379	0.98047	-0.10889	173.321	-55.955	988.6569	-2.08	1.5185	-0.19736	-71.007	0.33	27.325	0.020996	-0.071777	0.039063	-107.226	14.4919	3.17204	0.060547	-0.037598	-0.14307	22.496	242.015	1053.526	-1.0656	0.62939	-0.246	26.939	-93.034	107.149	-0.36328	0.35547	0.036621	61.2611	4.7473	22.4183	-0.067383	-0.020508	-0.016602
0.538	40.421	74.297	1341.702	-1.3135	0.9624	-0.10596	198.309	32.181	988.0411	-1.9172	1.4812	-0.18535	-68.6297	-45.898	53.703	0.025879	-0.081299	0.031494	-100.541	45.9727	22.5405	0.059082	-0.019531	-0.14941	18.925	187.071	1025.7659	-1.0238	0.59795	-0.23506	-21.789	-35.135	128.977	-0.41626	0.3711	0.0070802	23.158	35.107	3.28	-0.061328	-0.026856	-0.02041
0.54	-1.075	67.651	1303.931	-1.2905	0.95361	-0.10791	115.859	6.21000000000001	1010.206	-1.7469	1.4	-0.17246	-50.97	50.2823	40.7938	0.031738	-0.090332	0.027832	-84.521	31.4212	11.94585	0.053711	-0.0056153	-0.15576	45.412	200.608	987.683	-0.98438	0.57227	-0.2207	-62.065	-94.86	173.453	-0.47607	0.38867	-0.034668	39.587	-2.865	13.709	-0.049902	-0.034765	-0.026953
0.542	22.261	71.008	1305.296	-1.2593	0.92822	-0.10938	47.5231	-17.416	1033.59	-1.5893	1.3106	-0.14463	-54.0772	21.4928	27.6305	0.038086	-0.098633	0.013184	-86.93	-3.595	29.244	0.053223	-0.0014648	-0.16113	30.417	172.0967	949.579	-0.9458	0.55147	-0.2082	-66.239	-27.0524	266.392	-0.56885	0.41748	-0.082031	72.713	-11.76968	26.4984	-0.032715	-0.042578	-0.035547
0.544	-11.567	107.1588	1259.2964	-1.2378	0.91846	-0.11328	2.521	-35.732	985.092	-1.4707	1.2363	-0.10352	-38.652	23.503	37.273	0.041992	-0.10254	0.0087891	-55.2636	30.91987	21.582	0.033691	0.0087891	-0.16943	30.248	163.935	933.81739	-0.9125	0.52598	-0.19854	-70.679	32.25168	407.004	-0.62256	0.43604	-0.104	6.873	16.69251	14.4111	-0.016992	-0.04873	-0.041015
0.546	-65.141	89.787	1221.707	-1.1929	0.896	-0.11621	8.915	-156.3923	974.0014	-1.3889	1.1912	-0.048828	-27.733	55.741	23.0401	0.052246	-0.10205	-0.0019531	-76.3837	2.807	9.037	0.027832	0.0087891	-0.17236	12.228	217.5025	907.309	-0.8793	0.50722	-0.18877	-97.921	-13.606	581.07	-0.75781	0.48633	-0.13428	57.5513	-12.917	27.458	0	-0.056641	-0.050781
0.548	-36.846	119.0473	1206.2356	-1.1609	0.8772	-0.11402	42.645	-196.8055	986.7372	-1.3316	1.1493	0.0075194	-17.906	-32.577	30.089	0.056641	-0.10278	-0.012696	-43.229	11.6465	53.292	-0.0024414	0.016602	-0.18262	-26.365	188.7	901.1333	-0.84726	0.48633	-0.17695	-113.931	45.8233	691.788	-0.93164	0.54492	-0.16846	33.831	13.0812	-0.4434	0.015918	-0.068555	-0.056934
0.55	-94.161	140.826	1179.17791	-1.1245	0.85205	-0.11035	59.7103	-212.9137	982.8635	-1.2863	1.1134	0.041113	-1.854	7.45659	10.02064	0.062988	-0.104	-0.020996	-10.973	18.4806	53.129	-0.039307	0.031739	-0.18774	-3.852	222.418	888.78	-0.81055	0.4668	-0.16406	-122.889	-5.6655	757.491	-1.0298	0.58447	-0.17529	-31.713	33.7916	-8.2861	0.027637	-0.075196	-0.065918
0.552	-67.8931	129.9331	1181.834	-1.0781	0.8125	-0.10791	55.5771	-249.647	1008.2044	-1.232	1.0801	0.057129	-4.489	1.1263	7.4356	0.067383	-0.1084	-0.038574	-7.239	-6.3874	104.6214	-0.091309	0.043945	-0.1958	-42.587	233.932	843.202	-0.77578	0.44219	-0.15547	-121.263	-50.436	839.7904	-1.2461	0.67383	-0.19238	18.369	7.9734	8.537	0.041309	-0.084961	-0.074512
0.554	-38.408	173.9436	1154.5842	-1.0425	0.78222	-0.10498	30.142	-217.354	1033.737	-1.1538	1.0513	0.069336	6.883	-42.423	25.5219	0.072266	-0.10498	-0.039551	18.787	71.653	165.633	-0.18945	0.061035	-0.20557	-67.053	208.9195	822.375	-0.73808	0.41836	-0.14824	-117.681	-0.890999999999998	916.198	-1.4148	0.75122	-0.19849	-14.895	44.38	-0.812000000000001	0.046582	-0.095801	-0.080078
0.556	-90.0902	171.056	1095.471	-1.0034	0.75049	-0.10449	-18.645	-293.067	1077.805	-1.0592	1.0238	0.078321	20.931	35.2852	20.3674	0.071777	-0.10986	-0.062012	28.351	75.887	224.1618	-0.24365	0.07666	-0.20752	-53.356	240.0488	779.02	-0.69941	0.39882	-0.13653	-151.752	-47.549	984.296	-1.5879	0.83301	-0.20264	-46.0535	27.399	13.15	0.045898	-0.10156	-0.083984
0.558	-65.3555	175.017	1060.222	-0.95508	0.70313	-0.10254	-43.4701	-336.069	1147.69764	-0.9582	0.98985	0.087695	27.559	3.8413	1.88303	0.076416	-0.10303	-0.07251	31.907	71.6643	338.5426	-0.39355	0.11377	-0.21094	-95.5201	208.7146	725.2037	-0.65791	0.37744	-0.1251	-144.023	-9.232	984.723	-1.7925	0.95166	-0.20166	-42.413	14.7109	20.7215	0.037695	-0.10391	-0.091699
0.56	-67.7182	224.336	1030.794	-0.92529	0.67822	-0.104	-59.5826	-295.832	1180.099	-0.87109	0.95898	0.094726	38.414	17.2112	9.66402	0.075684	-0.10449	-0.083008	63.456	135.315	429.587	-0.52368	0.14673	-0.20678	-115.708	201.935	685.688	-0.61523	0.35254	-0.1084	-102.474	-26.159	938.2761	-1.8809	1.0117	-0.2002	-81.183	48.706	13.199	0.023437	-0.10537	-0.096485
0.562	-92.185	196.3078	1010.922	-0.87305	0.62891	-0.10645	-114.066	-275.368	1203.674	-0.79883	0.91602	0.10781	48.7627	50.839	10.1471	0.070801	-0.096191	-0.099121	74.64	97.8944	518.552	-0.68164	0.19141	-0.20264	-100.498	231.1483	643.804	-0.57471	0.33154	-0.09883	-48.8477	-124.166	964.83101	-2.0156	1.127	-0.19629	-49.197	24.4936	28.322	0.0089843	-0.10381	-0.092969
0.564	-64.242	214.934	989.8338	-0.82739	0.59888	-0.10937	-142.421	-174.4022	1235.128	-0.7417	0.87744	0.1123	23.37	-31.454	21.032	0.070801	-0.091309	-0.11279	93.221	94.694	670.585	-0.91846	0.28418	-0.19678	-125.845	200.449	604.166	-0.53496	0.31142	-0.08584	-25.939	-70.402	999.282	-2.0674	1.2143	-0.19995	-75.1193	60.581	11.03874	-0.0035156	-0.098047	-0.096971
0.566	-95.437	208.116	960.737	-0.78467	0.55908	-0.11572	-169.716	-109.307	1234.83884	-0.71299	0.82686	0.10185	29.457	10.3451	18.4553	0.064941	-0.085449	-0.12158	89.831	96.934	784.255	-1.0557	0.3457	-0.19385	-116.473	226.5276802	577.419	-0.49395	0.28642	-0.074121	-0.139000000000003	-110.492	1019.1603	-2.0776	1.2866	-0.19824	-113.554	76.6804	4.933	-0.012695	-0.089844	-0.10254
0.568	-89.66	164.2773	957.0869	-0.73633	0.51758	-0.11865	-161.97	-138.742	1237.893	-0.69267	0.78135	0.094434	17.7895	15.6927	-18.0585	0.061768	-0.077148	-0.13256	33.2472	28.0672	898.17265	-1.3477	0.47656	-0.1709	-137.637	226.05	534.721	-0.4583	0.26855	-0.061426	40.544	-150.377	1026.65	-2.0015	1.3501	-0.19678	-74.53	30.1074	33.7818	-0.020508	-0.080566	-0.1086
0.57	-90.43	184.1751	935.39007	-0.70459	0.49756	-0.12207	-93.224	-115.307	1238.775	-0.69385	0.73916	0.078809	14.124	-25.248	0.3181	0.058594	-0.066406	-0.14453	19.214	34.479	989.1692	-1.583	0.59033	-0.15942	-145.375	213.394	504.685	-0.42432	0.24854	-0.049316	43.5564	-120.562	1014.302	-1.9395	1.3672	-0.19727	-100.637	57.792	12.724	-0.022851	-0.068067	-0.10938
0.572	-108.131	197.973	908.43	-0.65479	0.45605	-0.12158	-54.48	-156.428	1270.706	-0.71123	0.70322	0.056152	17.949	40.5343	19.5247	0.056152	-0.05957	-0.16064	-20.54	-6.929	1058.026	-1.8159	0.71533	-0.1499	-103.9941	243.526	482.461	-0.38809	0.22725	-0.036426	59.942	-148.463	1028.517	-1.7852	1.3613	-0.19092	-91.508	16.621	32.7158	-0.022461	-0.052051	-0.11406
0.574	-21.588	207.0462	909.702	-0.62036	0.42896	-0.12525	-23.6454	-173.0539	1338.999	-0.73584	0.68213	0.029297	-28.102	7.215	0.392099999999999	0.057129	-0.052734	-0.16602	-47.486	-49.215	1123.528	-2.1167	0.89893	-0.13086	-123.52	203.6629	441.538	-0.35967	0.2125	-0.031836	89.196	-48.803	1034.0628	-1.6724	1.3501	-0.17627	-52.955	-5.3549	38.4829	-0.020703	-0.040722	-0.12256
0.576	-4.509	242.479	868.1795	-0.5874	0.40283	-0.12842	-24.7	-128.096	1348.076	-0.76397	0.66298	-0.0021485	-20.363	26.8626	8.7285	0.058105	-0.037598	-0.18164	-50.679	-27.754	1160.006	-2.3101	1.0385	-0.11182	-88.3354	177.412	425.27123	-0.32998	0.19062	-0.01582	92.361	50.963	1021.676	-1.5757	1.3325	-0.15967	-80.4413	32.7087	25.8398	-0.025391	-0.029297	-0.13037
0.578	-2.058	209.55829	831.4284	-0.54297	0.37012	-0.13281	15.9718	-177.265	1355.485	-0.79697	0.65752	-0.027441	-20.838	75.326	-4.3094	0.062256	-0.026123	-0.18848	-140.828	-99.687	1153.663	-2.4644	1.188	-0.095215	-79.1016	199.23159	407.5193	-0.30254	0.17539	-0.0011719	103.863	-1.08999999999999	1032.8435	-1.4883	1.3008	-0.12402	-24.43	-0.298	44.276	-0.018359	-0.021484	-0.13682
0.58	68.571	172.6958	797.8798	-0.51904	0.3501	-0.13574	43.0762	-173.002	1392.46	-0.83838	0.66299	-0.042676	-60.1669	6.2346	17.5917	0.067383	-0.014648	-0.19287	-176.379	-147.674	1173.31	-2.5781	1.4102	-0.066406	-73.7317	170.692	390.4984	-0.28125	0.15332	0.0058594	62.224	-14.01	1042.77607	-1.4629	1.2852	-0.10547	-34.121	33.59	21.4362	-0.022168	-0.0099609	-0.1416
0.582	51.6623	191.276	754.8244	-0.47705	0.3252	-0.13135	41.114	-162.656	1390.327	-0.88233	0.67627	-0.071582	-50.8587	45.3577	34.3766	0.07373	-0.0019531	-0.20508	-195.799	-142.271	1162.425	-2.5957	1.5215	-0.053711	-5.833	184.194	385.724	-0.25947	0.13701	0.017481	14.392	-113.3	1035.8909	-1.4253	1.2329	-0.068848	-50.402	53.8189	17.3983	-0.025293	0.0017578	-0.15019
0.584	65.615	169.7883	736.344	-0.44312	0.29809	-0.13843	30.1279	-208.743	1440.477	-0.93945	0.69336	-0.10352	-47.65289	28.827798	-3.082	0.07666	0.0053711	-0.20557	-231.33588	-156.371	1137.402	-2.5386	1.6646	-0.068848	3.664	175.132	341.4298	-0.24649	0.11953	0.024024	44.412	-197.464	1040.008	-1.3823	1.1968	-0.056396	21.777	20.8814	60.062	-0.03291	0.0085937	-0.14961
0.586	81.884	196.807	698.791	-0.41016	0.27734	-0.1377	33.7011	-155.5305	1457.4075	-1.0015	0.71865	-0.14599	-74.656	-9.278	0.597	0.077148	0.016602	-0.20947	-181.027	-97.149	1083.335	-2.4118	1.6506	-0.12061	16.59	138.7739	325.386	-0.23047	0.10351	0.029101	71.213	-196.8468	1042.5868	-1.3247	1.1577	-0.046875	-5.034	35.815	76.74932	-0.038574	0.020508	-0.15625
0.588	34.6592	193.817	643.7202	-0.36572	0.25049	-0.13965	53.832	-164.56409	1467.9081	-1.0759	0.74463	-0.18711	-55.8016	56.1482	4.059	0.075684	0.023438	-0.21729	-163.6858	-67.925	1004.5345	-2.209	1.5469	-0.19141	50.5565	143.843	290.2493	-0.21455	0.088183	0.038965	76.8934	-259.818	1068.808	-1.2271	1.1099	-0.053711	15.215	-30.4192	107.29	-0.052832	0.028808	-0.15674
0.59	73.1841	162.248	632.5124	-0.34473	0.23633	-0.13965	92.508	-184.366	1511.942	-1.1837	0.78916	-0.22265	-84.391	16.2482	18.724	0.069824	0.032715	-0.23096	-183.157	-58.0579	1003.9168	-1.8452	1.3013	-0.26611	23.161	109.8094	264.475	-0.20215	0.074219	0.043457	87.1756	-253.956	1077.448	-1.1689	1.0869	-0.055664	38.574	-35.924	128.754	-0.070215	0.040528	-0.15371
0.592	48.35251	206.83	586.296	-0.30273	0.21826	-0.14014	115.636	-143.283	1490.788	-1.3322	0.86856	-0.2457	-65.2673	30.5662	36.5272	0.058594	0.047852	-0.24414	-160.268	13.152	999.659	-1.6616	1.147	-0.28711	47.321	99.1539	252.7357	-0.19258	0.061621	0.053613	63.555	-226.1658	1072.65	-1.0547	1.0488	-0.048828	8.267	17.1309	135.5678	-0.10303	0.054981	-0.14863
0.594	32.947249	199.5784	543.548	-0.27002	0.19604	-0.13574	114.248	-185.8051	1475.979	-1.5112	0.98486	-0.26465	-50.8081	64.411	54.039	0.052246	0.057617	-0.24316	-180.214	-7.791	982.8074	-1.3652	0.87402	-0.32568	55.3946	109.43	236.377	-0.18174	0.049023	0.061816	68.044	-289.809	1122.917	-0.98413	1.0193	-0.039795	53.91683	3.4786	212.1936	-0.15244	0.067676	-0.14443
0.596	81.53	187.47	539.307	-0.24316	0.17871	-0.13818	130.402	-143.5601	1456.939	-1.7243	1.1409	-0.27861	-54.3467	-29.51818	56.6146	0.016113	0.090332	-0.24609	-177.127	-31.048	1000.982	-1.2175	0.72144	-0.34009	16.543	81.1462	214.0215	-0.17471	0.040039	0.068457	10.725	-265.128	1196.666	-0.92773	0.98828	-0.033691	58.096	33.8733	281.521	-0.22461	0.079102	-0.14404
0.598	11.152	212.148	494.5163	-0.20654	0.14941	-0.13477	109.414	-85.719	1425.527	-1.9527	1.3281	-0.29092	-34.078	-16.0606	98.1114	-0.029785	0.11157	-0.24536	-149.61	-18.521	949.418	-1.127	0.61523	-0.34619	45.903	101.4771	193.882	-0.17256	0.031738	0.076074	-44.52	-283.658	1245.066	-0.87305	0.94336	-0.032227	30.2664	57.7932	355.883	-0.31602	0.099514	-0.13926
0.6	17.353	143.6647	474.3502	-0.1875	0.1377	-0.13135	79.42	-92.5701	1456.14255	-2.1836	1.5347	-0.2999	-21.16	-23.638	103.361	-0.086914	0.13184	-0.25439	-167.565	-92.109	924.925	-1.0776	0.5708	-0.37354	26.875	118.425	161.4028	-0.16309	0.022949	0.088867	-77.067	-280.671	1275.82	-0.8457	0.91406	-0.043457	85.399	11.794	494.23	-0.42773	0.129	-0.13184
0.602	36.298	136.212	444.3317	-0.15332	0.11914	-0.125	76.628	-19.177	1447.0955	-2.3752	1.7498	-0.30156	-23.005	-34.4331	144.03545	-0.18408	0.16943	-0.26416	-142.5383	-86.342	925.269	-1.0566	0.55664	-0.3877	-0.481999999999999	109.6558	152.4976	-0.16035	0.017188	0.094434	-144.575	-184.3659	1290.889	-0.79785	0.84375	-0.063477	77.025	62.5059	605.543	-0.56875	0.16728	-0.13262
0.604	6.767	139.177	400.4519	-0.13623	0.1045	-0.12574	40.94	-28.8166	1431.304	-2.4839	1.9419	-0.2666	8.291	35.714	212.246	-0.24072	0.1958	-0.26611	-109.526	-103.195	928.46	-0.99609	0.54541	-0.40186	15.302	125.554	147.1329	-0.15537	0.009375	0.10235	-167.375	-183.352	1287.685	-0.76489	0.79224	-0.08545	36.856	26.875	766.0407	-0.73486	0.21514	-0.12842
0.606	5.234	90.908	397.932	-0.12061	0.092773	-0.12109	-11.021	-43.655	1445.12	-2.4013	2.0299	-0.15273	18.57545	13.3765	301.046	-0.38086	0.26611	-0.27246	-48.05	-198.4207	1005.402	-0.93408	0.53858	-0.3999	-23.426	97.966	120.8741	-0.14795	0.0050781	0.10938	-132.347	-157.552	1284.95793	-0.7334	0.74463	-0.10498	45.8349	4.76545	883.6505	-0.92773	0.2832	-0.1084
0.608	-42.33556	136.5299	338.486917	-0.10498	0.074219	-0.11475	-42.0858	4.047	1428.007	-2.6305	2.0746	-0.33398	35.4292	39.8643	418.962	-0.5127	0.33399	-0.27173	-11.469	-209.155	1041.76251	-0.8667	0.52783	-0.40088	-29.631	81.1397	112.8949	-0.1459	-0.0010742	0.1168	-130.894	-110.946	1290.079	-0.70996	0.67773	-0.12891	-24.199	10.1977	947.886	-1.1631	0.37227	-0.077734
0.61	-86.99	130.201	290.5604	-0.10303	0.067871	-0.11084	-50.2142	-20.703	1473.072	-2.6262	2.1851	-0.40821	66.772	114.858	534.673	-0.66992	0.41504	-0.26709	-16.9243	-277.138	1045.2941	-0.77832	0.49805	-0.41113	-28.295	83.156	87.155	-0.13672	-0.0092773	0.12646	-94.643	-152.939	1324.568	-0.71533	0.65186	-0.14014	-54.141	-67.5536	1053.81	-1.441	0.48691	-0.05957
0.612	-58.1889	116.2924	268.601	-0.095703	0.053711	-0.10498	-77.4362	6.66	1510.84117	-2.4704	2.1819	-0.34893	63.956	68.0365	658.907	-0.92578	0.54932	-0.24805	44.6169	-300.475	1107.5885	-0.74512	0.47949	-0.41504	-87.8874	45.3351	90.5166	-0.12929	-0.010254	0.1291	-86.964	-122.717	1358.737	-0.74756	0.61963	-0.15186	-81.635	-53.723	1111.185	-1.7621	0.6248	-0.043164
0.614	-88.344	155.6487	234.11	-0.094726	0.050293	-0.10303	-96.622	30.531	1497.304	-2.312	2.0747	-0.29199	70.827	82.422	802.479	-1.0723	0.62793	-0.24023	98.473	-245.567	1143.039	-0.67285	0.43701	-0.42725	-76.811	57.767	71.3554	-0.11845	-0.014648	0.13164	-104.522	-138.304	1360.346	-0.80176	0.61328	-0.14697	-144.407	-45.846	1167.366	-2.0997	0.7792	-0.03916
0.616	-78.161	74.119	245.3088	-0.09375	0.04834	-0.09668	-120.962	-38.753	1508.248	-2.1722	1.9732	-0.27803	73.991	35.6645	900.939	-1.4023	0.80371	-0.2041	79.623732	-258.888	1199.738	-0.64038	0.41626	-0.43261	-86.2276	62.2435	38.511	-0.1044	-0.017773	0.1336	-73.4542	-187.131	1392.077	-0.87256	0.62158	-0.13916	-149.983	-90.755	1201.878	-2.4238	0.9502	-0.041504
0.618	-61.01499	91.2445	224.65835	-0.099609	0.041504	-0.092285	-130.94	-31.4733	1507.453	-2.0335	1.8657	-0.29434	32.901	-47.729	1005.899	-1.6687	0.96118	-0.16479	109.099	-200.5974	1244.552	-0.63672	0.39795	-0.43457	-121.552	40.537	29.2692	-0.092383	-0.023144	0.13535	-64.225	-164.654	1413.2728	-0.99414	0.65625	-0.14941	-242.399	-77.093	1169.4501	-2.701	1.1365	-0.054297
0.62	-96.174	110.8542	183.2095	-0.098145	0.035156	-0.089355	-140.411	-43.0481	1499.3222	-1.8925	1.7676	-0.31035	37.201	-12.373	1094.912	-1.9414	1.125	-0.11914	108.522	-160.4552	1251.304	-0.68799	0.39404	-0.42432	-98.278	33.8155	38.059	-0.077637	-0.028809	0.14063	-65.38463	-208.337	1432.969	-1.0684	0.68555	-0.16016	-244.3863	-155.766	1188.079	-2.8956	1.3228	-0.077734
0.622	-60.4981	73.022	184.504	-0.096191	0.029297	-0.083496	-123.122	-43.658	1506.254	-1.7651	1.6661	-0.31553	4.686	-47.192	1131.679	-2.3008	1.3711	-0.063477	79.581	-177.5383	1308.4	-0.73682	0.40283	-0.4165	-118.509	4.204	29.342	-0.067871	-0.032226	0.14092	-58.6244	-193.257	1453.289	-1.2188	0.74219	-0.2041	-230.679	-167.55	1181.358	-2.9534	1.49	-0.1125
0.624	-68.9743	132.4287	148.6282	-0.095459	0.025146	-0.088135	-110.296	13.891	1491.9875	-1.666	1.5625	-0.30664	-43.62	-70.454	1189.766	-2.4727	1.4941	-0.04834	87.787	-111.323	1337.3097	-0.88281	0.45117	-0.39551	-112.949	6.864	44.7712	-0.063379	-0.046192	0.13399	-92.885	-138.852	1475.539	-1.3409	0.81591	-0.23413	-249.936	-129.509	1144.1196	-2.8639	1.6229	-0.11523
0.626	-50.8356	111.6574	112.4757	-0.095215	0.019531	-0.089355	-134	-36.242	1477.0554	-1.5857	1.4795	-0.29805	-79.368	-72.9188	1173.187	-2.7749	1.7798	-0.05127	55.989	-119.431	1349.4771	-1.0347	0.51856	-0.37842	-85.02	39.8583	28.3012	-0.055566	-0.046972	0.14141	-44.4897	-171.639	1501.7	-1.4766	0.90625	-0.23633	-199.9798	-152.906	1126.4661	-2.6636	1.7095	-0.10693
0.628	2.774	82.8726	100.327	-0.091309	0.0087891	-0.089844	-113.082	-22.8524	1497.9495	-1.5165	1.4115	-0.29854	-131.353	-163.658	1176.765	-2.9106	1.9731	-0.084717	57.676	-113.83	1380.4899	-1.1992	0.60742	-0.36426	-108.529	28.7368	16.5892	-0.050196	-0.053125	0.14795	6.845	-128.465	1525.441	-1.7026	1.0825	-0.23438	-198.971	-96.9464	1103.844	-2.4023	1.7031	-0.14512
0.63	-40.9768	131.393	59.313	-0.091309	0.00048828	-0.089844	-99.158	8.988	1470.6965	-1.4555	1.3615	-0.30049	-119.875	-167.855	1205.774	-2.9253	2.1079	-0.12939	53.825	-52.928	1364.741	-1.4233	0.76221	-0.32861	-53.633	44.3171	26.19681	-0.046875	-0.061035	0.15039	31.074	-107.225	1514.727	-1.832	1.1836	-0.23145	-225.257	-44.982	1092.7121	-2.0954	1.6013	-0.21709
0.632	-9.539	56.389	88.1522	-0.085449	-0.010742	-0.10059	-70.4448	4.1801	1466.33	-1.4011	1.3259	-0.29727	-149.096	-176.136	1179.719	-2.7026	2.1216	-0.22021	-7.711	-85.506	1380.456	-1.5288	0.84131	-0.32471	-51.951	52.69	-1.306	-0.042383	-0.067774	0.14991	66.31	-133.721	1517.3582	-2.1172	1.4121	-0.22461	-175.709	-29.267	1102.4442	-1.7454	1.4138	-0.29873
0.634	5.485	64.7039	90.1454	-0.081299	-0.017822	-0.093018	-42.18	98.271	1462.01	-1.355	1.2974	-0.2915	-159.761	-205.461	1155.889	-2.4941	2.0605	-0.27979	-35.39	-56.06	1449.9313	-1.7046	1.0298	-0.34521	-53.1065	46.9742	3.0171	-0.037793	-0.074609	0.15312	70.0318	-107.217	1505.289	-2.3221	1.5784	-0.22436	-193.206	32.536	1077.6741	-1.4044	1.1769	-0.38135
0.636	1.042	84.5117	60.8689	-0.079102	-0.021484	-0.095703	-59.0572	110.932	1445.6338	-1.3295	1.2681	-0.28106	-140.0594	-145.395	1116.1308	-1.9858	1.8442	-0.37842	-48.7838	-36.975	1468.7963	-1.8037	1.165	-0.38135	16.365	44.384	24.9957	-0.02998	-0.077344	0.15352	76.026	-117.6868	1481.465	-2.5039	1.7461	-0.2207	-194.754	-28.93	1058.3592	-1.1304	0.95752	-0.44287
0.638	51.7682	26.1378	49.189	-0.07666	-0.035156	-0.088867	-33.292	93.279	1461.9792	-1.3159	1.2415	-0.26474	-163.503	-103.3766	1069.407	-1.6121	1.6438	-0.43383	-68.6811	-87.6036	1523.173	-1.877	1.2676	-0.42627	-20.185	31.382	11.3747	-0.019141	-0.085938	0.15019	68.904	-103.0093	1477.7158	-2.6758	1.9453	-0.20752	-155.7476	-64.159	1041.648	-0.9458	0.78701	-0.47197
0.64	38.1723	79.78	27.997	-0.077637	-0.037109	-0.086914	11.694	125.875	1415.3795	-1.314	1.2169	-0.2542	-143.435	-59.693	1087.5574	-1.3179	1.4478	-0.4751	-88.0842	-62.7175	1563.749	-1.9331	1.3403	-0.48975	6.823	28.5817	21.555	-0.0092773	-0.088867	0.14551	39.973	-49.77814	1466.7589	-2.73	2.0161	-0.20557	-194.002	-93.426	1032.536	-0.82109	0.68672	-0.49257
0.642	41.9444	57.107	40.4749	-0.077148	-0.043457	-0.083496	13.088	52.959	1381.833	-1.3216	1.1917	-0.24053	-135.386	1.67	1089.1182	-1.0723	1.2266	-0.51074	-131.544	-97.907	1569.301	-1.9546	1.3579	-0.4917	39.856	35.207	12.731	0.0056641	-0.093067	0.14287	56.898	-71.022	1460.4	-2.6616	2.0962	-0.14453	-109.682	-170.9149	1065.008	-0.7332	0.64023	-0.50937
0.644	58.7552	36.597	59.3016	-0.083252	-0.047851	-0.075928	34.32	53.341	1378.663	-1.3276	1.1675	-0.2251	-170.305	-38.597	1067.25602	-0.99365	1.1353	-0.51904	-147.656	-144.461	1599.904	-2.0327	1.3755	-0.49854	2.758	24.3952	16.2972	0.02041	-0.099316	0.13916	24.316	-19.1641	1460.094	-2.5925	2.0715	-0.10986	-45.289	-191.574	1082.065	-0.66064	0.62412	-0.52637
0.646	22.17	99.896	28.3264	-0.086426	-0.047363	-0.070801	46.826	73.0118	1327.6404	-1.339	1.1434	-0.2081	-168.781	-64.245	1058.8646	-0.89844	0.99219	-0.55664	-147.898	-101.175	1584.695	-2.1148	1.3843	-0.50146	63.9646	31.1566	38.438	0.03291	-0.10557	0.13526	-36.647	23.5268	1445.555	-2.7339	2.0747	-0.26123	-64.4235	-222.541	1086.878	-0.58057	0.61768	-0.5249
0.648	48.98487	23.771	40.8926	-0.092773	-0.049805	-0.061035	32.413	36.459	1325.6729	-1.3387	1.1156	-0.19297	-178.665	-82.841	1016.615	-0.82397	0.90551	-0.58594	-174.327	-130.674	1590.375	-2.2124	1.4048	-0.50928	50.6593	30.438	17.5137	0.043945	-0.11191	0.13555	-32.452	-6.809	1491.645	-2.6206	2.1216	-0.29102	-2.687	-260.284	1120.4172	-0.50762	0.61035	-0.50996
0.65	65.86649	31.051	48.6088	-0.092285	-0.051758	-0.056641	68.4876	85.9023	1307.344	-1.3367	1.0879	-0.18008	-162.48	-179.1562	1040.408	-0.72656	0.82031	-0.60352	-127.828	-92.5207	1598.124	-2.3408	1.4395	-0.52734	29.267	21.8578	23.6247	0.052246	-0.12109	0.12402	-51.499	14.529	1537.50146	-2.5229	2.0708	-0.23389	5.287	-218.932	1153.914	-0.45147	0.5915	-0.49463
0.652	7.977	60.2102	5.385	-0.097168	-0.048828	-0.043945	66.5231	48.0285	1287.7148	-1.3312	1.0647	-0.16914	-98.1393	-192.472	1086.797	-0.57813	0.71875	-0.59375	-104.144	-52.6778	1562.03	-2.4043	1.459	-0.54102	70.49851	22.1142	36.8703	0.058496	-0.12666	0.12363	-90.6758	-16.955	1542.9676	-2.3887	1.9375	-0.15234	34.42	-219.472	1205.0609	-0.40771	0.55245	-0.48994
0.654	23.504	16.9053	17.2956	-0.097901	-0.041015	-0.033447	46.641	16.127	1286.285	-1.3223	1.043	-0.15723	-124.915	-242.2057	1076.019	-0.50244	0.67041	-0.5874	-118.911	-85.511	1550.521	-2.5137	1.542	-0.57031	11.59	24.6434	39.7973	0.068164	-0.12978	0.12109	-117.7681	-43.552	1535.1024	-2.2927	1.8636	-0.15259	58.95	-208.302	1270.2703	-0.37724	0.49541	-0.48506
0.656	10.174	80.656	10.1597	-0.097168	-0.030762	-0.03418	25.978	72.5289	1256.8338	-1.314	1.0271	-0.15537	-90.0563	-298.238	1081.728	-0.36279	0.58105	-0.57324	-79.322	-21.5147	1564.195	-2.573	1.6184	-0.59205	33.961	24.333	51.672	0.071679	-0.13681	0.11953	-149.538	-16.313	1490.404	-2.1797	1.7891	-0.16113	33.722	-201.9774	1302.811	-0.35352	0.43262	-0.47412
0.658	-43.1283	39.733	35.7	-0.095703	-0.031738	-0.01709	-34.192	53.0892	1231.1532	-1.2995	1.0021	-0.14658	-48.5563	-251.23	1112.995	-0.28515	0.52002	-0.56103	-77.203	-24.5285	1563.8416	-2.5991	1.686	-0.60986	36.53	24.6332	37.4585	0.077539	-0.13916	0.11582	-147.507	-54.417	1507.703	-2.0112	1.6724	-0.17432	54.872	-231.379	1324.779	-0.36407	0.36758	-0.44707
0.66	-34.028	-0.116	59.243	-0.096191	-0.028809	-0.0083008	-33.566	107.2482	1218.3757	-1.2812	0.98291	-0.14151	-21.191	-294.32	1182.971	-0.229	0.47412	-0.55029	-15.152	-21.842	1591.687	-2.5483	1.7446	-0.61084	-22.89	26.04406	25.75833	0.086426	-0.14258	0.11426	-156.587	-32.1847	1533.079	-1.9292	1.6099	-0.16943	38.154	-181.68	1337.983	-0.40899	0.32705	-0.41836
0.662	-61.3099	48.009	27.6288	-0.087402	-0.024902	-0.00097656	-39.2207	142.387	1180.004	-1.26	0.96699	-0.13867	26.057	-281.821	1265.702	-0.20166	0.43066	-0.51855	24.21946	47.72	1570.0247	-2.4956	1.7446	-0.60498	-15.54	45.305	58.82	0.091504	-0.13769	0.11426	-174.043	-12.965	1514.843	-1.791	1.4766	-0.15967	2.883	-149.344	1351.701	-0.51055	0.31767	-0.38906
0.664	-45.8953	0	23.1518	-0.073731	-0.026367	0.010498	-38.583	100.53	1169.1039	-1.2397	0.95166	-0.14014	47.369	-239.783	1292.85	-0.2124	0.41309	-0.50293	18.51873	26.0784	1556.736	-2.334	1.7012	-0.59473	-47.0653	57.451	24.4417	0.098633	-0.13643	0.11064	-153.213	-61.62797	1497.154	-1.6899	1.3979	-0.15845	30.947	-133.35	1392.991	-0.66699	0.3458	-0.36211
0.666	-56.424	28.978978	34.664	-0.063477	-0.030273	0.016602	-40.9789	146.6595	1139.4452	-1.2175	0.93135	-0.13115	63.8862	-262.591	1334.176	-0.28467	0.4043	-0.46729	69.914	40.9499	1583.766	-2.1982	1.6221	-0.59326	-63.83702	46.467	34.4712	0.10293	-0.13487	0.10635	-147.641	-23.4323	1479.849	-1.6035	1.3301	-0.15869	7.886	-90.233	1393.9045	-0.86182	0.42041	-0.33643
0.668	-102.781	55.4296	37.4277	-0.039551	-0.038574	0.021973	-74.171	136.865	1105.636	-1.1883	0.91386	-0.13008	63.5072	-206.239	1382.06	-0.3982	0.42212	-0.43872	65.234	63.816	1573.9764	-2.0684	1.5117	-0.58545	-35.883	30.718	25.286	0.11347	-0.129	0.10693	-161.89	-30.6743	1459.9006	-1.4951	1.2598	-0.17432	-5.114	-128.344	1408.215	-1.0789	0.52891	-0.30625
0.67	-57.58615	-9.144	48.684	-0.030273	-0.04541	0.023438	-92.376	141.766	1099.8895	-1.1621	0.8916	-0.12773	48.5837	-176.26	1385.7866	-0.54395	0.46875	-0.42285	64.91097	6.99847	1605.3557	-1.9414	1.377	-0.56445	-97.657	12.1642	1.783	0.11719	-0.12354	0.10254	-140.92396	-6.7868	1462.701	-1.4448	1.2319	-0.1792	14.45	-133.983	1438.3595	-1.2987	0.64892	-0.26758
0.672	-82.129	31.3266	24.6328	-0.0029297	-0.069336	0.025391	-69.0082	203.366	1056.201	-1.1319	0.86465	-0.12354	60.4291	-173.244	1416.59	-0.78467	0.57861	-0.40674	91.929	34.653	1611.1124	-1.896	1.3169	-0.55615	-103.516	-0.0489999999999995	39.6518	0.1247	-0.11621	0.098047	-163.498	73.141	1435.3289	-1.3672	1.1797	-0.19238	-77.5366	-132.032	1440.036	-1.5167	0.78877	-0.24805
0.674	-105.276	-5.2455	35.236	0.010254	-0.088623	0.026367	-70.7495	172.7607	1026.708	-1.105	0.82861	-0.11865	58.107	-103.693	1433.4164	-0.97315	0.69141	-0.396	106.793	7.33143	1585.24	-1.8477	1.2236	-0.54199	-81.8541	1.251	29.883	0.13242	-0.10538	0.092675	-145.698	49.7	1421.5069	-1.3189	1.1431	-0.18311	-68.163	-163.883	1470.499	-1.7174	0.95372	-0.25058
0.676	-59.5005	-24.61115	65.176	0.026367	-0.10547	0.019043	-35.1424	183.2018	990.458	-1.0708	0.79092	-0.11738	72.2582	-137.141	1422.88	-1.1563	0.81641	-0.38477	111.72	-24.7676	1589.9145	-1.8162	1.1765	-0.52808	-126.037	2.637	30.5458	0.13672	-0.096391	0.086431	-133.1715	74.153	1417.69947	-1.2754	1.1113	-0.17529	-54.518	-144.459	1476.032	-1.8921	1.1372	-0.27393
0.678	-81.0985	51.838	36.401	0.046875	-0.13281	0.019531	-57.954	176.452	955.317	-1.039	0.75439	-0.1125	46.014	-129.419	1453.593	-1.3672	1	-0.39063	134.66	30.717	1583.8797	-1.7969	1.1348	-0.51172	-89.3206	5.517	49.464	0.13789	-0.084961	0.083498	-118.748	89.172	1392.0914	-1.23	1.0708	-0.18018	-115.521	-145.761	1494.515	-2.0283	1.3073	-0.3041
0.68	-56.0419	-3.2581	28.1806	0.054199	-0.14844	0.016113	-115.578	136.697	960.031	-1.003	0.72002	-0.10977	18.235	-119.493	1465.882	-1.4707	1.0938	-0.41016	114.614	-4.0059	1577.22	-1.7656	1.1035	-0.49219	-99.807	22.3145	21.1967	0.14063	-0.077148	0.078125	-69.103	38.441	1392.451	-1.2148	1.0508	-0.17383	-88.327	-170.672	1529.476	-2.1219	1.4531	-0.33359
0.682	-42.762	19.3971	9.553	0.068848	-0.17285	0.0063477	-81.02	184.3402	971.591	-0.96758	0.68438	-0.10488	-1.443	-167.953	1501.3948	-1.645	1.2739	-0.47998	88.141	8.341	1563.788	-1.7534	1.0903	-0.48389	-85.4849	18.9404	33.9787	0.13818	-0.062495	0.075194	-40.27	84.851	1349.457	-1.1797	1.0137	-0.16895	-118.004	-138.235	1535.3677	-2.1825	1.566	-0.3457
0.684	-57.5739	29.3372	11.438	0.078613	-0.18921	0.0024414	-63.149	185.2228	956.2248	-0.93506	0.65576	-0.10303	-1.13200000000001	-157.3791	1560.546	-1.7691	1.4004	-0.53199	68.47	54.216	1531.7645	-1.7246	1.0762	-0.46777	-37.084	20.4953	37.93658	0.1369	-0.048618	0.069431	0.0530000000000044	67.753	1306.3117	-1.1484	0.98633	-0.16016	-144.346	-150.304	1586.785	-2.2324	1.6461	-0.37226
0.686	2.084	-35.914	53.584	0.089844	-0.20166	-0.0039063	-49.3929	192.1634	949.012	-0.90205	0.62647	-0.099609	-39.4374	-160.742	1560.307	-1.8979	1.5181	-0.56787	39.6612	35.517	1540.976	-1.6961	1.0657	-0.45923	-76.987	15.4643	13.677	0.12831	-0.030643	0.069046	22.116	43.834	1281.923	-1.1284	0.97314	-0.15869	-99.669	-131.291	1605.576	-2.2656	1.6895	-0.40625
0.688	-0.422000000000001	34.782	30.2468	0.098633	-0.21338	-0.015137	-21.91225	224.754	894.6034	-0.86797	0.59746	-0.095996	-49.085	-203.294	1594.229	-2.082	1.6738	-0.60156	58.0245	116.2485	1543.304	-1.666	1.0527	-0.44238	-34.763	-9.6201	27.36237	0.11464	-0.018738	0.06533	23.349	68.0863	1252.192	-1.1045	0.94629	-0.15381	-119.498	-109.3612	1582.036	-2.2891	1.7015	-0.43174
0.69	15.283	15.4938	14.8259	0.10498	-0.22168	-0.021973	-3.171	181.4061	865.89447	-0.82735	0.57402	-0.097168	-72.0517	-135.154	1607.501	-2.1738	1.7441	-0.61133	6.187	139.079	1486.6708	-1.623	1.0313	-0.42529	7.692	-12.8138	21.63	0.10059	0	0.060059	45.046	4.84	1266.8953	-1.084	0.93359	-0.15112	-89.213	-125.7468	1535.8546	-2.2859	1.6931	-0.45264
0.692	30.13	-8.995	26.727	0.11963	-0.2207	-0.031738	32.7765	213.3346	857.119	-0.78838	0.55049	-0.091113	-101.571	-157.253	1603.026	-2.3413	1.8735	-0.6499	-31.95	133.751	1489.342	-1.6035	1.0176	-0.42676	-29.245	-3.6252	8.0762	0.083623	0.018726	0.065912	37.747	46.3842	1261.266	-1.0659	0.92041	-0.14502	-59.5426	-100.2676	1507.726	-2.2534	1.6396	-0.47217
0.694	2.883	49.896	2.1332	0.12109	-0.22363	-0.048828	61.128	234.4455	805.0304	-0.74609	0.5293	-0.09082	-87.783	-151.651	1654.038	-2.4219	1.9443	-0.6836	-50.423	194.112	1436.8865	-1.5625	0.99609	-0.40039	12.399	7.7727	20.5047	0.064136	0.036152	0.063953	29.024	83.0824	1237.7006	-1.0469	0.90234	-0.1416	-61.365	-93.79	1514.487	-2.2096	1.5748	-0.50127
0.696	44.283	-30.338	17.0109	0.12695	-0.22559	-0.055176	70.887	196.9996	778.36	-0.70283	0.4999	-0.092187	-118.814	-120.8473	1655.738	-2.4551	1.9766	-0.71777	-102.547	136.151	1413.1901	-1.5391	0.979	-0.38623	15.891	39.0333	3.5147	0.041886	0.056477	0.065918	18.947	56.7271	1225.821	-1.0366	0.89111	-0.13721	-14.578	-103.451	1538.536	-2.1694	1.5337	-0.52686
0.698	54.1783	-1.66096	3.6234	0.13184	-0.21533	-0.065918	117.305	213.8494	735.7234	-0.66045	0.47725	-0.093652	-109.842	-185.958	1651.176	-2.3823	1.9282	-0.76318	-98.377	137.4352	1407.448	-1.519	0.95947	-0.37646	4.576	43.35	20.4867	0.019491	0.076315	0.066009	-7.05099999999999	121.009	1168.2286	-1.019	0.86963	-0.12842	-11.745	-54.086	1543.157	-2.1641	1.5453	-0.55215
0.7	35.7483	24.83977	-5.7326	0.13599	-0.2102	-0.077149	90.145	182.695	710.668	-0.61787	0.45225	-0.090528	-65.474	-152.571	1635.9709	-2.3125	1.875	-0.78516	-107.665	156.528	1361.0686	-1.4839	0.93311	-0.35986	53.2543	49.69	26.9769	0.0053711	0.091797	0.069336	1.482	104.2785	1106.3618	-0.99489	0.84594	-0.12256	-4.7065	-54.331	1542.094	-2.1992	1.5945	-0.58242
0.702	68.1674	-28.379	32.1734	0.1333	-0.20166	-0.085449	80.172	195.83	701.9434	-0.57285	0.42207	-0.090039	-77.093	-125.839	1595.301	-2.1543	1.7891	-0.80078	-125.264	98.448	1366.16668	-1.4604	0.91846	-0.34961	31.8946	35.3	8.2994	-0.013147	0.11551	0.071921	25.094	115.8677	1101.1406	-0.97461	0.81934	-0.11523	48.3253	-30.1849	1556.23	-2.2414	1.6524	-0.58867
0.704	16.366	36.627	16.1233	0.12891	-0.19141	-0.10449	105.641	251.825	676.454	-0.53271	0.39111	-0.089844	-77.711	-136.031	1603.4345	-2.0994	1.7864	-0.80445	-91.665	135.9676	1315.912	-1.4214	0.89307	-0.33057	42.6147	1.3986	23.7159	-0.03051	0.13375	0.070373	-18.976	180.33099	1085.1485	-0.94336	0.77539	-0.10742	39.9579	16.142	1542.315	-2.241	1.6894	-0.56016
0.706	10.654	12.8413	5.6875	0.12646	-0.18994	-0.11572	55.487	227.551	649.431	-0.49551	0.35976	-0.080957	-30.3772	-56.2138	1615.7373	-2.1094	1.832	-0.82227	-135.302	119.04	1279.351	-1.3838	0.87256	-0.32153	62.0439	-8.2584	22.485	-0.046076	0.1541	0.066835	-13.578	128.905	1074.3618	-0.9209	0.75586	-0.10254	62.99374	11.27	1556.876	-2.2129	1.6816	-0.55469
0.708	17.123	-3.0544	11.5542	0.12061	-0.17627	-0.12451	65.553	227.65	628.868	-0.45498	0.32783	-0.079199	-22.356	-63.7617	1595.827	-2.1484	1.918	-0.80078	-131.733	106.644	1270.755	-1.3457	0.8457	-0.31445	6.92	6.5857	15.7162	-0.059471	0.17138	0.065668	-10.868	161.874	1043.541	-0.87988	0.70508	-0.094727	83.082	33.978	1543.6786	-2.1648	1.647	-0.59209
0.71	-17.022	55.245	-14.9718	0.11279	-0.16797	-0.13404	39.45509	202.606	576.887	-0.41865	0.29502	-0.076465	0.543900000000001	-58.2255	1603.008	-2.1421	1.9517	-0.76904	-81.9065	162.692	1249.589	-1.2905	0.81885	-0.29834	51.7986	10.98678	27.936	-0.072266	0.18799	0.063965	-50.17718	174.2561	985.172	-0.84522	0.6626	-0.08667	54.979	20.3845	1530.524	-2.0827	1.5782	-0.60772
0.712	-4.563	-15.25659	17.5057	0.10791	-0.15869	-0.146	23.357	177.4306	548.184	-0.38769	0.25976	-0.074609	51.221	-13.832	1593.255	-1.9819	1.9458	-0.63623	-112.649	135.891	1239.199	-1.2617	0.80176	-0.28662	21.359	36.097	-8.6339	-0.083624	0.19949	0.065727	-65.406	157.3174	991.2349	-0.81006	0.62158	-0.08252	88.683	-24.0553	1543.381	-1.9843	1.4923	-0.59209
0.714	-26.549	15.5986	17.8895	0.09375	-0.14844	-0.1582	43.025	187.64956	539.5944	-0.35547	0.22754	-0.068848	55.215	-81.38131	1621.8477	-2.0552	1.8941	-0.74365	-83.7531	159.03	1238.86	-1.1987	0.76025	-0.26904	-35.743	32.7757	9.1312	-0.092996	0.21078	0.065665	-56.7381	228.788	941.86	-0.76123	0.56885	-0.082031	67.707	-3.4835	1545.221	-1.9008	1.4077	-0.56709
0.716	-44.95134	54.2902	-7.901	0.088379	-0.14014	-0.16016	8.351	158.367	507.235	-0.3248	0.20039	-0.069824	66.998	-61.781	1645.3228	-2.0039	1.8809	-0.80371	-51.391	198.9029	1192.80733	-1.1367	0.71387	-0.24805	-10.712	23.979	44.284	-0.10628	0.21701	0.062578	-85.199	196.869	910.999	-0.74023	0.53906	-0.08252	68.2745	-21.3542	1555.2409	-1.8433	1.3286	-0.56689
0.718	-44.4344	6.66	9.4092	0.072754	-0.12646	-0.16943	-7.33	138.993	504.199	-0.29551	0.16865	-0.068359	52.313	-38.3781	1622.7459	-1.8198	1.7583	-0.69775	-58.911	185.1523	1163.6519	-1.1011	0.69385	-0.23877	-37.327	15.2985	56.085	-0.12055	0.2202	0.049044	-112.388	185.036	889.841	-0.69531	0.48633	-0.076172	106.603	-0.989599999999999	1549.725	-1.7912	1.2678	-0.57618
0.72	-72.3635	65.726	7.722	0.060547	-0.11158	-0.17993	-21.9693	153.1995	445.6966	-0.26621	0.14131	-0.063282	82.725	-77.4234	1628.646	-1.7534	1.6743	-0.66162	-4.534	234.921	1136.4383	-1.0425	0.64893	-0.21973	-50.4327	-25.7069	83.9227	-0.13379	0.22461	0.035156	-121.627	205.418	857.003	-0.66552	0.45361	-0.070068	28.86	40.862	1509.1904	-1.7421	1.2214	-0.57588
0.722	-83.2415	43.3387	12.6328	0.050781	-0.09668	-0.18701	-77.741	137.154	409.40522	-0.24141	0.11767	-0.05957	114.143	-19.878	1609.0178	-1.6904	1.5586	-0.6377	9.057	233.868	1105.2089	-1	0.61817	-0.20313	-61.3665	-38.0652	83.817	-0.14474	0.23199	0.017287	-99.997	135.903	878.2712	-0.63867	0.42188	-0.06543	40.4776	30.1769	1493.314	-1.6984	1.1901	-0.57353
0.724	-66.8944	21.35514	21.45556	0.035156	-0.080078	-0.19287	-59.9965	153.9916	399.9476	-0.21777	0.091309	-0.058594	124.252	-48.6465	1604.6713	-1.6501	1.5158	-0.63599	0.198999999999998	217.791	1100.532	-0.96484	0.58398	-0.18604	-103.385	-28.6754	113.079	-0.16862	0.23738	0.0053975	-85.956	181.156	877.088	-0.60449	0.38428	-0.064453	47.2941	63.449	1488.0107	-1.6526	1.1662	-0.56426
0.726	-100.513	84.2	11.244	0.026855	-0.066895	-0.19824	-57.9429	161.085	367.8346	-0.19629	0.070117	-0.054199	134.539	-47.655	1622.384	-1.6128	1.4868	-0.63281	45.179	248.502	1044.454	-0.90625	0.5459	-0.16455	-78.7799	-35.66827	202.604	-0.20821	0.24615	-0.010226	-75.3344	191.2885	832.1942	-0.58594	0.36768	-0.062012	-24.2866	77.639	1456.04367	-1.6035	1.1543	-0.55664
0.728	-83.449	-0.177999999999999	36.3599	0.011719	-0.053711	-0.20361	-93.985	132.396	344.156	-0.17471	0.045606	-0.056348	118.005	0.7325	1571.897	-1.5854	1.4653	-0.61621	33.301	215.131	1003.25	-0.88281	0.52734	-0.15381	-128.963	-10.858	273.733	-0.2638	0.2493	-0.043191	-54.2927	158.705	805.6421	-0.5542	0.33643	-0.061523	-13.135	56.4353	1465.1122	-1.5536	1.1476	-0.55283
0.73	-56.3765	15.3638	55.614	0.0024414	-0.037353	-0.21021	-46.6461	138.851774	304.58536	-0.15557	0.029199	-0.054004	112.923	-43.645	1570.96066	-1.5762	1.4531	-0.6084	58.58	221.656	981.7287	-0.83203	0.4873	-0.12891	-168.42	12.6731	396.876	-0.33691	0.25195	-0.071777	-8.989	223.168	766.5826	-0.52758	0.31274	-0.05835	-37.563	102.203	1453.9734	-1.5014	1.1341	-0.54482
0.732	-89.502	41.2386	17.7766	-0.0068359	-0.023926	-0.21777	-96.221	112.9202	270.056	-0.1415	0.01084	-0.05166	97.981	-4.6135	1565.5074	-1.5698	1.4478	-0.59326	53.212	223.342	957.7898	-0.79663	0.45874	-0.10986	-92.866	44.33	565.756	-0.42355	0.27025	-0.10282	11.8252	182.1398	725.9741	-0.50342	0.28955	-0.060547	-78.074	106.0452	1421.6996	-1.4546	1.1165	-0.53779
0.734	-56.3329	-16.2982	7.7566	-0.025391	-0.0058594	-0.23438	-80.6	89.617	268.7855	-0.12695	-0.0078125	-0.051758	77.548	24.0797	1528.21433	-1.5539	1.4446	-0.58667	28.751	180.0399	933.574	-0.76367	0.43555	-0.097168	-138.914	64.405	698.27	-0.52737	0.29039	-0.13734	18.7894	171.8855	700.004	-0.46582	0.26514	-0.0625	-71.199	114.2396	1423.02	-1.4189	1.0909	-0.51894
0.736	-55.329	60.87	6.668	-0.03418	0.00097656	-0.23926	-31.372	116.3052	251.0848	-0.11543	-0.024805	-0.046485	81.947	13.31834	1524.341	-1.5254	1.4395	-0.58008	41.087	191.4381	913.0195	-0.7124	0.39697	-0.072754	-121.5435	3.9677	842.534	-0.65661	0.32065	-0.15014	26.5859	186.10094	652.9032	-0.44531	0.25146	-0.067383	-113.871	158.818	1380.7053	-1.3906	1.0645	-0.50391
0.738	-27.722	20.2109	69.714	-0.066406	0.033691	-0.23633	-77.293	105.899	198.7139	-0.10459	-0.039258	-0.046094	48.803	104.794	1506.0199	-1.4746	1.4141	-0.57861	-10.442	180.7241	880.612	-0.69238	0.37598	-0.0625	-76.07914	-30.906	933.277	-0.81492	0.36435	-0.16466	13.837	122.693	623.2733	-0.40723	0.22021	-0.066406	-95.086	123.42792	1385.79	-1.3838	1.0377	-0.4832
0.74	-0.951000000000001	-37.7945	100.984	-0.10474	0.057373	-0.23169	-28.278	114.2155	169.02167	-0.1003	-0.05332	-0.041406	-0.862	105.913	1503.813	-1.4487	1.3989	-0.56006	-1.75	181.488	886.869	-0.64893	0.33838	-0.04248	-74.622	-66.997	1018.761	-1.0059	0.4248	-0.17139	28.532	174.7887	601.11126	-0.38038	0.20361	-0.071777	-77.33443	128.213	1368.986	-1.3835	1.0072	-0.46123
0.742	-16.832	3.033	102.9903	-0.15527	0.079102	-0.22656	-46.56135	106.8713	130.465	-0.094824	-0.063184	-0.041699	-10.2019	104.246	1500.77	-1.394	1.3618	-0.54395	-7.301	220.321	852.204	-0.61303	0.30419	-0.022461	21.3684	-85.376	1158.721	-1.2308	0.49859	-0.17375	55.5757	200.169	553.9242	-0.3501	0.18311	-0.069824	-132.111	130.336	1308.577	-1.3835	0.98525	-0.44482
0.744	26.9243	-52.5644	130.267	-0.24268	0.11084	-0.23633	-46.4292	74.149	141.8624	-0.091309	-0.082031	-0.044434	-44.673	147.122	1453.05132	-1.367	1.3225	-0.52661	-76.5242	212.8815	783.774	-0.58154	0.27881	-0.01123	-0.369	-58.982	1195.816	-1.4708	0.59298	-0.16983	61.83091	191.688	544.624	-0.31445	0.16162	-0.078125	-118.099	97.443	1300.8624	-1.3782	0.96397	-0.42627
0.746	47.495	-34.49	184.9989	-0.29053	0.12402	-0.24561	13.253	83.3102	159.3131	-0.089453	-0.096679	-0.038574	-58.339	82.6456	1421.7978	-1.3413	1.2876	-0.51416	-53.871	222.5571	755.1664	-0.5332	0.23779	0.0097656	0.887999999999998	-82.811	1207.803	-1.7169	0.70115	-0.16829	84.818	224.315	508.51	-0.29688	0.14795	-0.081543	-103.959	138.579	1272.904	-1.3667	0.94971	-0.40576
0.748	13.0362	-3.442	239.6385	-0.39893	0.16162	-0.26025	22.4968	68.55028	134.86961	-0.085644	-0.10351	-0.037109	-50.7157	93.47499	1409.1585	-1.3008	1.2402	-0.49121	-83.7883	214.8458	711.6337	-0.5127	0.22314	0.016602	114.269	-96.162	1208.802	-1.9535	0.82393	-0.17134	63.72	168.5	463.7481	-0.26514	0.12451	-0.081055	-118.366	137.999	1253.3076	-1.3485	0.93555	-0.38614
0.75	35.254	-26.354	341.6076	-0.49878	0.19653	-0.27564	49.4299	51.138	124.4329	-0.084082	-0.11445	-0.035156	-78.146	91.8098	1354.101	-1.2813	1.2227	-0.48047	-120.799	182.845	684.512	-0.47412	0.18848	0.029297	115.30505	-94.522	1213.195	-2.1587	0.95166	-0.17773	57.898	167.879	453.81	-0.24316	0.11035	-0.084961	-60.086	128.733	1258.5495	-1.321	0.91983	-0.37138
0.752	67.599	67.719	434.899	-0.61865	0.2417	-0.28271	72.32	57.331	89.815	-0.07998	-0.12256	-0.035742	-109.859	52.379	1350.9858	-1.2441	1.1816	-0.46143	-82.6817	190.202	665.199	-0.44653	0.16773	0.041993	161.153	-137.135	1241.752	-2.3171	1.0882	-0.17979	71.578	181.174	395.147	-0.21826	0.098145	-0.083496	-79.2419	172.556	1214.8188	-1.2878	0.90303	-0.35771
0.754	80.488	72.0036	580.894	-0.82031	0.3125	-0.2876	37.6579	54.0172	65.331	-0.07959	-0.12842	-0.036133	-85.05	113.067	1313.781	-1.2156	1.1575	-0.44703	-137.259	196.0372	602.44339	-0.42725	0.14648	0.053223	193.109	-148.936	1201.709	-2.3997	1.229	-0.17808	53.8243	109.804	383.3614	-0.19385	0.080078	-0.089355	-39.002	146.1959	1200.3072	-1.25	0.88281	-0.34394
0.756	90.656	32.818	743.602	-0.94482	0.36475	-0.29199	58.8283	70.552	69.5395	-0.071972	-0.13272	-0.033594	-115.552	86.775	1286.9182	-1.189	1.1382	-0.4292	-155.73	182.686	575.2034	-0.40234	0.12598	0.066895	175.791	-179.29	1164.67	-2.3912	1.341	-0.16126	60.8616	131.422	362.6605	-0.18652	0.070801	-0.087402	-15.486	174.547	1191.416	-1.2075	0.85791	-0.3291
0.758	72.382	68.995	837.998	-1.229	0.47998	-0.29053	74.5186	86.021	45.6429	-0.065039	-0.13447	-0.035058	-118.823	101.63	1286.9527	-1.144	1.1011	-0.40576	-114.221	206.555	520.66	-0.39404	0.11621	0.07666	201.115	-196.771	1136.533	-2.3094	1.4245	-0.12837	11.347	104.095	320.0036	-0.1665	0.062012	-0.086426	-50.338	201.743	1145.3593	-1.1613	0.82305	-0.31562
0.76	79.844	-14.963	961.852	-1.4715	0.60083	-0.2727	55.49948	56.581	48.2345	-0.054883	-0.13291	-0.034278	-100.5954	163.7866	1253.1942	-1.1167	1.0786	-0.39844	-151.451	206.523	458.262	-0.37988	0.10352	0.086914	177.345	-124.626	1093.4598	-2.1816	1.4551	-0.10498	-11.315	82.955	306.0815	-0.1499	0.052979	-0.089111	17.484	156.46945	1134.737	-1.1172	0.78496	-0.29941
0.762	54.968	-21.971	1084.694	-1.7261	0.73779	-0.25537	85.173	55.077	49.045	-0.048144	-0.13662	-0.037305	-101.7273	134.812	1237.62775	-1.0601	1.0317	-0.38232	-117.375	216.3112	426.063	-0.37402	0.095459	0.096436	146.019	-73.001	1103.039	-2.0185	1.4149	-0.10264	-12.4662	142.394	275.073	-0.1333	0.041504	-0.089844	6.01300000000001	180.858	1085.715	-1.0762	0.74551	-0.2916
0.764	-15.574	-12.697	1150.08	-2.0776	0.95361	-0.23828	22.953	45.1579	21.789	-0.036621	-0.13477	-0.041504	-50.334	192.562	1198.9186	-1.0134	0.99342	-0.3684	-101.855	208.515	413.776	-0.37109	0.097168	0.098633	161.682	-12.04	1093.4249	-1.8372	1.3267	-0.092504	-50.226	93.2174	252.629	-0.11768	0.032715	-0.086914	-1.39899999999999	151.695	1040.026	-1.0382	0.71162	-0.2751
0.766	-18.941	-88.085	1207.279	-2.2383	1.0723	-0.22852	15.101	40.457	22.6151	-0.026758	-0.13408	-0.041113	-62.032	200.97	1161.1526	-0.96094	0.94922	-0.3457	-120.516	176.359	423.9301	-0.36328	0.095215	0.095703	79.413	-4.5	1076.339	-1.6696	1.2209	-0.062825	-58.0718	93.2341	247.563	-0.10889	0.02832	-0.09082	44.293	130.3199	1036.0691	-1.0039	0.6748	-0.25684
0.768	-65.579	-54.073	1176.731	-2.5273	1.3457	-0.21143	19.541	68.7323	22.07914	-0.019726	-0.13086	-0.038574	-34.972	162.528	1143.0879	-0.89697	0.89209	-0.3252	-76.7758	177.4722	403.2716	-0.36377	0.094238	0.10645	16.3231	-80.344	1089.9147	-1.5336	1.132	-0.013402	-63.4044	105.6765	207.0924	-0.091797	0.020996	-0.091309	16.857	184.128	1001.3599	-0.96797	0.64824	-0.24531
0.77	-136.7763	-101.627	1154.99	-2.688	1.5806	-0.21655	-43.862	65.348	21.5166	-0.020118	-0.12422	-0.031543	0.682000000000002	200.853	1136.4686	-0.86572	0.85986	-0.31201	-74.63033	174.4841	364.1169	-0.34961	0.10156	0.1084	13.693	-110.018	1089.844	-1.4448	1.063	0.035645	-70.2377	47.369	182.897	-0.073974	0.0092774	-0.096925	17.946	145.288	978.3	-0.93808	0.62012	-0.2336
0.772	-136.145	-152.894	1181.771	-2.791	1.8184	-0.23926	-5.851	67.175	32.4957	-0.025	-0.11778	-0.024511	-5.903	179.586	1094.6696	-0.80322	0.79736	-0.28857	-25.554	170.734	342.547	-0.34155	0.1045	0.11377	1.516	-186.3149	1070.524	-1.3975	1.0264	0.057915	-66.5429	88.307	162.27	-0.05957	0.0024414	-0.10547	6.15	156.474	942.191	-0.90136	0.60137	-0.2207
0.774	-160.671	-135.707	1137.7926	-2.7925	2.0278	-0.29541	-39.8543	60.281	12	-0.033691	-0.11084	-0.015625	26.976	174.603	1064.5729	-0.76538	0.75611	-0.27319	18.859	186.809	319.676	-0.32813	0.10938	0.11279	31.861	-259.597	1072.524	-1.3514	1.0118	0.083401	-75.3	72.651	139.246	-0.042969	-0.0097656	-0.104	-47.383	182.9848	880.009	-0.86709	0.57822	-0.21015
0.776	-160.96	-200.39	1121.982	-2.7124	2.0571	-0.33496	-75.5112	42.32	25.3761	-0.048438	-0.10195	-0.0096681	30.571	201.058	1026.4861	-0.72656	0.71094	-0.2583	6.048	170.5696	286.5335	-0.3125	0.125	0.11377	8.577	-279.806	1046.2356	-1.2987	1.0114	0.099418	-73.547	64.378	147.036	-0.029297	-0.016113	-0.10889	-25.424	135.338	880.30788	-0.82861	0.55908	-0.19775
0.778	-141.8204	-172.497	1063.63	-2.4297	1.9805	-0.41309	-45.376	48.077	56.9591	-0.064844	-0.091797	0.0012695	17.606	156.259	994.785	-0.67529	0.65967	-0.23779	48.431	144.6336	270.7192	-0.30469	0.13086	0.11279	-34.722	-328.55	1068.5388	-1.2289	1.0047	0.11524	-40.4323	111.1053	110.1096	-0.015625	-0.025879	-0.11182	-23.717	197.1911	864.7193	-0.79053	0.5374	-0.18769
0.78	-144.056	-129.536	994.3914	-2.1338	1.8115	-0.47046	-109.845	44.6522	49.4489	-0.080079	-0.082422	0.0059571	33.123	181.643	963.674	-0.65039	0.63184	-0.22656	48.7516	132.821	233.392	-0.28271	0.14307	0.11035	-12.464	-323.763	1120.075	-1.1421	0.98975	0.13428	-68.585	71.89504	74.967	-0.0051269	-0.032227	-0.1145	-89.4985	194.2386	820.38356	-0.7456	0.52002	-0.17061
0.782	-140.581	-113.436	1024.81	-1.8164	1.5996	-0.52148	-108.817	37.183	41.59	-0.091699	-0.07168	0.014453	32.968	154.9388	906.61009	-0.60547	0.58496	-0.20801	52.1742	113.6697	215.8188	-0.26343	0.14551	0.11158	-82.241	-299.263	1142.473	-1.0488	0.97187	0.15703	-61.6463	83.323	51.6237	0.0019531	-0.039551	-0.1167	-63.053	177.2953	814.128	-0.70303	0.504	-0.1581
0.784	-137.922	-8.345	1010.1477	-1.4604	1.3257	-0.56494	-66.0148	27.9197	12.004	-0.1001	-0.058105	0.021484	23.792	113.327	885.16	-0.56812	0.55127	-0.19092	77.4211	116.3605	217.1515	-0.24902	0.15137	0.10938	-119.442	-329.536	1222.627	-0.96163	0.94072	0.1708	-35.452	97.671	46.669	0.0068359	-0.044922	-0.11865	-79.073	231.939	762.0997	-0.66299	0.47647	-0.15196
0.786	-151.185	-6.867	1002.209	-1.3257	1.2134	-0.56982	-109.788	15.947	0.976000000000001	-0.10293	-0.042773	0.027148	30.532	150.655	877.203	-0.53711	0.51563	-0.16797	43.3121	138.427	164.1428	-0.21924	0.15723	0.10938	-125.507	-274.04	1263.9174	-0.89366	0.89464	0.15518	-46.202	50.7271	49.7488	0.0063477	-0.046875	-0.11816	-105.1105	162.2977	735.639	-0.62305	0.45703	-0.13428
0.788	-109.012	-43.211	1006.457	-1.1543	1.0645	-0.57031	-84.639	14.3207	47.022	-0.10176	-0.029297	0.030469	-3.151	139.527	860.288	-0.48389	0.47119	-0.14014	49.327	144.438	152.462	-0.20703	0.16016	0.10791	-184.922	-252.399	1246.2038	-0.84931	0.83545	0.10684	-1.977	71.4305	49.114	0.0087891	-0.052246	-0.11914	-107.62754	183.55	695.4531	-0.57813	0.4334	-0.1166
0.79	-146.2	-42.218	983.057	-1.0778	0.99828	-0.57788	-75.5149	25.9982	50.8214	-0.094726	-0.019922	0.029688	-6.234	173.878	831.584	-0.45996	0.44922	-0.13574	72.775	148.941	137.24194	-0.17383	0.16162	0.10547	-166.939	-220.837	1284.2011	-0.82568	0.77197	0.044922	13.016	34.7535	36.143	0.0007324	-0.050293	-0.12061	-126.208	215.6805	640.762	-0.53428	0.4081	-0.10781
0.792	-129.125	-120.769	1012.359	-1.002	0.94629	-0.58984	-98.542	23.424	43.87	-0.085058	-0.012598	0.034668	-5.899	219.876	777.303	-0.41797	0.39209	-0.11035	-0.140000000000001	143.741	124.147	-0.15796	0.15844	0.0979	-154.418	-146.529	1295.1446	-0.8123	0.71914	-0.023439	4.887	18.924	50.0801	-0.0043945	-0.044434	-0.11621	-125.239	156.731	629.83	-0.49404	0.38037	-0.090235
0.794	-80.746	-158.919	1033.559	-0.86914	0.87891	-0.59277	-59.6377	16.3763	46.8514	-0.072754	-0.0043945	0.031738	-69.48	181.151	747.601	-0.37964	0.35742	-0.1001	40.901	131.0246	138.798	-0.13379	0.16064	0.09668	-163.007	-148.822	1314.4756	-0.82412	0.67705	-0.084961	41.6521	78.397	38.7546	-0.01416	-0.039063	-0.11035	-158.503	197.7756	595.179	-0.45342	0.35185	-0.075781
0.796	-95.3152	-177.304	1015.11	-0.78564	0.84131	-0.5918	-88.899	25.9089	29.1135	-0.0542	-0.0041016	0.02959	-54.901	199.391	693.359	-0.34863	0.32227	-0.087891	34.907	132.058	113.2994	-0.10645	0.15283	0.085449	-58.44229	-113.551	1346.454	-0.85108	0.64463	-0.13301	46.2378	53.598	25.5027	-0.022461	-0.03125	-0.10791	-157.632	168.68	553.962	-0.41455	0.32373	-0.05957
0.798	-47.349	-262.393	1038.011	-0.62012	0.76172	-0.57227	-44.895	23.492	58.4744	-0.038867	-0.00048828	0.031152	-72.68	178.958	635.9316	-0.30371	0.27832	-0.069336	-48.876	112.3625	88.03	-0.09375	0.15625	0.083496	-52.9648	-99.44	1350.914	-0.90342	0.63232	-0.17148	63.1329	58.818	14.11208	-0.030273	-0.022461	-0.10107	-124.191	148.669	537.1019	-0.37959	0.29932	-0.043945
0.8	-25.952	-289.843	1060.341	-0.50757	0.69946	-0.55957	39.869	40.451	51.3009	-0.030274	-0.00087889	0.031543	-94.8986	163.336	594.56446	-0.28809	0.26025	-0.062988	-12.675	102.354	95.8222	-0.069336	0.14746	0.082031	-37.2447	-132.3198	1400.751	-0.96631	0.64111	-0.20361	64.4203	50.742	-9.3041	-0.038086	-0.012207	-0.092529	-133.412	232.544	491.709	-0.34619	0.27071	-0.02168
0.802	0.338000000000001	-321.296	1115.646	-0.40576	0.6333	-0.54004	-10.224	46.838	18.871	-0.023047	0.00058588	0.029981	-84.1646	163.037	554.535	-0.24805	0.21436	-0.049316	-56.4042	90.144	69.4	-0.055909	0.1438	0.080079	8.546	-110.1644	1410.521	-1.0436	0.65928	-0.25537	38.984	-6.899357	8.6154	-0.044922	-0.00097656	-0.084473	-97.8687	192.8385	487.07727	-0.32041	0.24961	-0.0052734
0.804	61.1323	-326.936	1197.853	-0.31885	0.54297	-0.52002	23.931	25.4037	37.862	-0.016602	0.0014648	0.033203	-146.916	129.157	516.235	-0.22973	0.1875	-0.035644	-78.37	67.067	64.969	-0.043945	0.1377	0.080566	-15.33	-148.18	1409.231	-1.1285	0.69668	-0.29453	61.8111	19.9621	23.9124	-0.04834	0.0048828	-0.072754	-86.424	212.062	478.37773	-0.29941	0.22256	0.011621
0.806	54.018	-257.214	1260.1608	-0.29346	0.5083	-0.51025	18.7492	22.1556	12.4617	-0.0086911	-0.0019531	0.030762	-118.628	142.441	479.694	-0.21338	0.16406	-0.025879	-59.7053	46.50527	55.1769	-0.030762	0.12744	0.083496	20.218	-164.433	1458.469	-1.2207	0.74434	-0.3293	49.9068	18.9912	17.49	-0.052734	0.0087891	-0.069336	-82.4134	223.852	433.2973	-0.27832	0.20166	0.024902
0.808	71.3131	-243.375	1327.672	-0.29297	0.44531	-0.47852	25.751	0.719600000000001	25.6266	-0.0035155	-0.00048828	0.024512	-118.333	180.4452	429.459	-0.20459	0.13574	-0.0087891	-134.581	35.101	44.9767	-0.024902	0.11963	0.084473	31.0766	-150.9737	1472.947	-1.3181	0.80264	-0.3583	27.063	29.704	29.0449	-0.050293	0.016602	-0.052734	-32.691	147.718	428.5338	-0.26299	0.18242	0.043848
0.81	92.328	-205.165	1357.164	-0.3374	0.40845	-0.45313	70.9733	2.62576	44.0991	0.0019537	-0.0032231	0.022949	-144.965	173.7717	409.577	-0.20361	0.12109	0	-96.827	17.183	57.3473	-0.020508	0.10938	0.077637	28.195	-187.113	1497.974	-1.4233	0.86865	-0.3833	14.853	71.8	32.6513	-0.043213	0.014892	-0.051025	-19.328	193.9276	398.4737	-0.25029	0.16338	0.057715
0.812	54.17583	-157.037	1350.94	-0.42334	0.39014	-0.43848	33.126	-8.0437	29.0948	0.01377	-0.0040041	0.014257	-100.935	203.91	400.6343	-0.20117	0.099121	0.022461	-111.363	34.4212	42.196	-0.0095216	0.10327	0.081543	52.14015	-178.1929	1524.5	-1.5557	0.95469	-0.39326	-22.602	46.283	19.62098	-0.035645	0.016113	-0.042969	-16.227	162.269	371.6956	-0.23896	0.14424	0.070215
0.814	58.242	-160.471	1378.266	-0.60059	0.40625	-0.43164	53.952	-13.0894	36.2206	0.022949	-0.0087891	0.010742	-102.515	186.892	365.8934	-0.20703	0.077148	0.024414	-111.93	27.861	27.052	-0.003418	0.095215	0.081055	46.3698	-154.003	1550.899	-1.7094	1.0613	-0.40136	-21.917	60.8	16.8621	-0.025879	0.0073242	-0.038086	14.701	156.283	354.8836	-0.23057	0.12802	0.083301
0.816	63.6796	-120.889	1397.0137	-0.70264	0.43408	-0.42676	66.1097	-7.5159	27.2611	0.033885	-0.012402	-0.0034171	-107.837	166.348	345.4778	-0.20703	0.074219	0.033691	-90.194	20.246	34.948	0.012207	0.07666	0.075195	74.1268	-161.8155	1588.009	-1.8824	1.1922	-0.39277	-9.159	64.237	15.5262	-0.020508	0.0019531	-0.033203	-6.383	233.013	293.034	-0.22021	0.11572	0.094727
0.818	31.893	-123.688	1417.4509	-0.92822	0.52197	-0.41553	-15.383	10.1994	15.8794	0.046481	-0.014256	-0.010642	-48.1911	170.203	316.714	-0.21387	0.066406	0.040527	-103.595	30.9841	46.39	0.021973	0.073242	0.07666	99.62	-108.987	1580.617	-2.0609	1.331	-0.38525	-63.873	19.2944	37.003	-0.0063477	-0.010742	-0.026855	12.217	154.111	274.705	-0.21016	0.10449	0.11065
0.82	42.595	-144.853	1460.3279	-1.1031	0.6145	-0.39062	18.293	-4.4743	42.484	0.058982	-0.020897	-0.023921	-54.4591	137.646	290.2	-0.21631	0.065918	0.047363	-84.241	27.301	48.388	0.043945	0.0625	0.081055	45.599	-103.854	1538.036	-2.2241	1.4751	-0.36963	-46.9446	32.0847	56.1021	3.4694e-15	-0.017334	-0.029785	48.513	159.304	279.2689	-0.21035	0.095019	0.12031
0.822	-10.811	-95.855	1445.286	-1.2676	0.7207	-0.37109	17.058	0.775400000000001	16.0971	0.062988	-0.021679	-0.034764	-21.673	138.325	284.4813	-0.21533	0.064453	0.053223	-54.7346	30.793	41.0962	0.05957	0.049072	0.081299	64.957	-117.22216	1553.8342	-2.3112	1.6056	-0.3168	-58.281	15.897	23.1	0.0024414	-0.029297	-0.019531	29.202	161.55	261.272	-0.20567	0.087207	0.12969
0.824	1.289	-127.891	1438.044	-1.4746	0.87891	-0.39063	-31.23	1.309	12.7584	0.066406	-0.022949	-0.041016	3.01300000000001	162.931	257.249	-0.22021	0.069336	0.05957	-69.8383	42.733	21.6398	0.073242	0.038574	0.087891	72.8274	-77.646	1530.9243	-2.3547	1.6898	-0.25468	-83.821	9.758	33.9876	0.0058594	-0.047852	-0.01709	46.7	85.691	256.488	-0.20537	0.087597	0.14004
0.826	17.896	-140.45	1485.3585	-1.5664	0.96875	-0.41895	-0.716999999999999	-6.24294	25.098	0.064255	-0.027342	-0.049321	-7.281	154.048	232.7511	-0.2168	0.079102	0.070801	-9.585	23.5566	29.022	0.097656	0.020508	0.092285	7.413	-88.307	1515.0293	-2.5418	1.7574	-0.33789	-59.54643	30.178	38.5065	0.0075684	-0.062744	-0.014893	36.63	140.803	244.8294	-0.21045	0.080078	0.14404
0.828	-70.2028	-135.448	1535.93	-1.7261	1.145	-0.49707	-67.8767	9.4272	-14.46	0.057613	-0.028805	-0.060649	57.4838	158.507	225.0109	-0.2085	0.092285	0.081543	-2.484	32.651	18.965	0.10303	0.011719	0.098145	11.016	-54.703	1527.2133	-2.5885	1.8529	-0.37911	-96.335	11.635	43.58	0.01123	-0.074219	-0.013184	13.771	129.9999	229.1144	-0.20615	0.079492	0.14316
0.83	-78.459	-195.371	1591.553	-1.8259	1.2639	-0.56396	-64.08276	17.1504	21.4881	0.049009	-0.025289	-0.065337	48.2934	138.609	196.6031	-0.20752	0.098876	0.083007	-7.575	13.5047	13.164	0.12402	-0.0029297	0.10059	-58.694	-17.0619	1503.573	-2.521	1.8794	-0.34326	-95.557	26.5588	48.866	0.012207	-0.088379	-0.0087891	15.374	113.2563	225.412	-0.20313	0.079784	0.14951
0.832	-65.705	-180.912	1604.544	-1.9272	1.3735	-0.61768	-28.309	29.653	21.7943	0.038371	-0.023138	-0.076471	20.284	117.396	176.129	-0.19824	0.1084	0.087402	58.9365	-7.62798	29.336	0.13672	-0.013916	0.10254	-109.1846	-41.7595	1511.35	-2.454	1.8503	-0.30166	-74.218	31.905	33.222	0.015137	-0.088379	-0.0068359	13.99	170.664	182.0786	-0.19454	0.080958	0.15654
0.834	-124.55	-193.58	1623.61	-2.0659	1.4985	-0.65381	-94.751	49.112	-1.0252	0.024902	-0.019043	-0.087891	54.024	113.8779	160.828	-0.18457	0.12549	0.09668	19.618	2.3736	21.343	0.14795	-0.026367	0.10645	-94.4789	0.175000000000004	1526.527	-2.3672	1.816	-0.28125	-113.613	-16.4819	40.1513	0.018555	-0.10059	-0.01123	-18.325	94.1171	157.032	-0.18819	0.080956	0.15186
0.836	-104.244	-199.847	1651.199	-2.1902	1.5891	-0.66455	-60.1256	34.041	12.7826	0.01525	-0.010374	-0.093446	43.656	108.7745	137.063	-0.17773	0.12305	0.09668	50.701	-7.336	42.853	0.16602	-0.043945	0.11719	-139.432	-16.352	1527.8	-2.2761	1.7648	-0.26485	-55.6673	-9.0713	53.441	0.023438	-0.10718	-0.014405	-29.719	109.7992	149.4249	-0.17871	0.080566	0.15381
0.838	-118.137	-157.205	1634.032	-2.3242	1.6738	-0.67285	-69.2941	38.207	-6.517	0.0045022	0.001928	-0.10836	49.859	111.2858	138.4783	-0.15576	0.13086	0.097656	83.193	0.407	43.009	0.17725	-0.055176	0.12061	-131.2172	-52.351	1573.306	-2.1847	1.7017	-0.25498	-45.4305	-12.204	30.1137	0.030273	-0.11523	-0.016602	-56.6433	121.8464	133.8714	-0.16699	0.076364	0.15596
0.84	-105.613	-159.519	1617.355	-2.4805	1.7715	-0.68945	-125.997	26.892	6.1298	-0.0021073	0.013609	-0.11735	66.4513	126.656	130.3418	-0.13623	0.12842	0.093994	44.7488	17.4725	8.2248	0.18945	-0.070801	0.13037	-143.596	-41.477	1554.317	-2.1069	1.6411	-0.24707	-47.197	-11.483	19.3368	0.041992	-0.12354	-0.023438	-76.2802	34.987	133.438	-0.15595	0.07627	0.16026
0.842	-72.363	-132.3253	1611.8966	-2.5332	1.8105	-0.70508	-86.2596	11.4423	28.5823	-0.0062575	0.027138	-0.12007	32.53	118.005	125.441	-0.11572	0.12646	0.098145	75.3182	-2.1872	19.7101	0.19971	-0.079102	0.12988	-198.087	-76.322	1535.333	-2.0432	1.5604	-0.23349	11.431	29.9876	16.116	0.050781	-0.12695	-0.028809	-79.3229	81.4934	89.6912	-0.14344	0.071571	0.16182
0.844	-88.648	-111.1679	1594.1338	-2.5449	1.8398	-0.7168	-110.099	11.516	14.1218	-0.0058594	0.041016	-0.13574	52.0877	126.683	116.87	-0.089844	0.11768	0.094727	49.146	5.7771	29.4962	0.21045	-0.087402	0.13672	-150.5	-68.286	1546.5786	-1.9905	1.4774	-0.21709	-15.246	22.0506	8.6015	0.067871	-0.14014	-0.039063	-95.94	38.276	74.6604	-0.12939	0.06631	0.16611
0.846	-22.8174	-144.433	1612.8654	-2.4519	1.8264	-0.65991	-77.4113	-2.306	20.9831	-0.010766	0.056092	-0.14379	-0.112000000000002	125.827	81.0912	-0.081055	0.11377	0.097656	22.901	2.25	26.259	0.2168	-0.09668	0.14941	-136.023	-37.977	1513.663	-1.9464	1.406	-0.21123	9.366	28.4727	33.501	0.081299	-0.14942	-0.04541	-103.256	1.97	88.1942	-0.12256	0.066895	0.1665
0.848	-14.663	-102.5388	1606.0345	-2.6323	1.8599	-0.81006	-47.4408	-7.76005	35.907	-0.011278	0.066072	-0.1564	-32.772	101.589	85.246	-0.061035	0.10059	0.094238	61.1581	-4.8656	41.4426	0.21924	-0.096191	0.15576	-126.108	-72.6922	1521.632	-1.9055	1.35	-0.20927	53.5839	29.448	13.7325	0.09375	-0.1543	-0.050781	-120.568	78.8188	60.705	-0.10734	0.053419	0.16163
0.85	-24.07074	-76.836	1585.845	-2.6523	2.002	-0.87158	-85.682	-2.279	43.975	-0.014794	0.076409	-0.16814	-16.502	69.005	68.0682	-0.046875	0.095215	0.097412	-0.0489999999999995	18.0638	7.32	0.21631	-0.10254	0.16016	-94.197	-34.9972	1526.7588	-1.8613	1.2969	-0.21289	28.121	-2.98772	12.3347	0.10693	-0.16162	-0.063965	-100.601	24.024	61.5919	-0.098074	0.044066	0.16016
0.852	30.644	-74.353	1576.652	-2.6089	2.0317	-0.84131	-30.788	-8.113	102.68604	-0.020521	0.08946	-0.17839	-58.305	42.397	59.064	-0.039063	0.086426	0.099121	-24.053	12.3535	9.5981	0.21558	-0.10718	0.1648	-135.218	-32.1089	1524.0809	-1.8082	1.2598	-0.21113	47.883	7.2536	24.912	0.11523	-0.16748	-0.069824	-101.108	71.434	40.0925	-0.085613	0.034715	0.15899
0.854	10.202525	-32.722	1562.185	-2.502	2.0195	-0.76953	1.645	20.409	99.884	-0.037598	0.10547	-0.18115	-49.8363	9.022	62.5657	-0.034668	0.07666	0.10156	2.115	26.3526	16.44	0.21143	-0.11182	0.16846	-95.7734	-27.8886	1525.225	-1.7629	1.2223	-0.20811	38.58694	-6.6253	11.83	0.12354	-0.16699	-0.08252	-104.525	79.343	24.494	-0.073382	0.023835	0.15743
0.856	36.1951	-33.398	1583.2016	-2.3747	1.9768	-0.75024	4.098	14.3929	150.1107	-0.072049	0.12103	-0.17496	-67.2408	9.372	29.478	-0.035156	0.071289	0.10889	-60.8289	61.175	-15.6888	0.20117	-0.11133	0.17822	-84.2889	23.4968	1504.1335	-1.7223	1.1925	-0.20693	21.713	-17.4816	26.144	0.12842	-0.15893	-0.090088	-68.5975	-7.4274	29.178	-0.064453	0.016602	0.15088
0.858	60.186	-28.337	1590.6699	-2.2246	1.9023	-0.74414	49.3984	-6.268	259.20981	-0.12077	0.12956	-0.18026	-119.626	16.643	44.3258	-0.033691	0.062012	0.11084	-37.4753	36.318	-3.7417	0.18921	-0.11109	0.18115	-102.95394	15.1274	1485.057	-1.6903	1.1643	-0.20283	63.1488	6.44961	15.5638	0.12842	-0.15625	-0.095703	-67.0199	45.8695	24.361	-0.054473	0.003585	0.14966
0.86	59.302	0.363	1598.98705	-1.9897	1.7134	-0.71826	23.8796	19.49146	306.128	-0.18877	0.14553	-0.18616	-64.7875	37.8078	51.058	-0.030518	0.058593	0.11133	-70.052	29.1028	1.4716	0.17676	-0.11084	0.18311	-51.668	56.374	1470.3433	-1.6694	1.1323	-0.19678	32.0123	-3.24086	-8.3561	0.125	-0.14844	-0.11035	-63.1352	1.606	13.253	-0.042231	-0.0043347	0.14802
0.862	100.006	-39.615	1619.271	-1.8833	1.6079	-0.69678	60.884	43.7779	429.713	-0.26966	0.1708	-0.1935	-108.095	49.739	25.4051	-0.022949	0.052246	0.11328	-119.39	14.204	10.431	0.15527	-0.10303	0.18066	-66.227	99.527	1413.228	-1.652	1.1175	-0.19013	19.957	-2.7845	11.5127	0.12012	-0.14209	-0.11328	-28.879	-21.087	34.2192	-0.031303	-0.013507	0.14186
0.864	113.436	-33.416	1619.58651	-1.7339	1.4067	-0.65381	102.08	83.179	540.713	-0.37402	0.2002	-0.19678	-93.349	28.4794	26.5421	-0.01416	0.038086	0.11328	-73.9929	-2.323	23.2163	0.14697	-0.10303	0.18213	-34.877	78.332	1402.436	-1.6409	1.0958	-0.18115	36.533	20.945	-1.6913	0.11035	-0.12891	-0.12549	-30.399	52.4324	30.48957	-0.023616	-0.020349	0.13871
0.866	95.403	-45.67	1602.5236	-1.6611	1.2823	-0.62891	54.342	94.109	641.246	-0.50635	0.24243	-0.18795	-56.1429569	12.225	32.0211	-0.0092773	0.033203	0.11328	-117.797	32.835	-7.455	0.125	-0.087402	0.17871	32.399	100.649	1410.7071	-1.6343	1.0798	-0.17217	-8.099	12.7244	-5.5512	0.10132	-0.11621	-0.13086	-2.303	-5.27916	27.227	-0.0083008	-0.027832	0.13379
0.868	135.148	-75.823	1594.9319	-1.6152	1.1992	-0.60938	85.246	61.258	805.48243	-0.6784	0.29984	-0.16958	-109.448	8.049	27.2231	0.012695	0.012207	0.11084	-106.477	19.093	3.4943	0.11524	-0.073975	0.1753	23.073	65.873	1391.897	-1.6251	1.0624	-0.16953	12.396	24.5433	9.5488	0.089844	-0.104	-0.13867	26.758	27.072	16.69409	0.0026518	-0.031441	0.13453
0.87	112.381	-30.785	1573.0842	-1.5952	1.1245	-0.60107	72.03	68.092	898.8691	-0.89441	0.37016	-0.15096	-71.5668	-1.817	39.2069	0.036133	-0.0046387	0.10815	-88.8525	23.1612	3.2004	0.10205	-0.054199	0.16846	65.5139	43.539	1380.845	-1.6172	1.0469	-0.16504	-17.518	20.6474	4.9189	0.075684	-0.07666	-0.1416	23.246	41.541	-19.19693	0.017376	-0.039884	0.12555
0.872	73.996	-45.742	1582.029	-1.5918	1.1074	-0.5957	13.876	40.9384	976.871	-1.1349	0.47202	-0.12584	-35.3031	16.4537	16.367	0.060547	-0.020996	0.10547	-120.233	45.9493	8.942819	0.085449	-0.028809	0.1665	74.6635	74.3375	1352.7101	-1.5923	1.0335	-0.16572	-46.7318	-2.509	28.1406	0.064941	-0.066895	-0.13965	38.757	-25.5575	3.2484	0.036282	-0.046104	0.12425
0.874	96.823	-20.77032	1570.027	-1.5874	1.0786	-0.5835	36.678	3.371	1077.238	-1.3862	0.59814	-0.097656	-65.4308	22.9665	6.01934	0.087891	-0.049316	0.097168	-55.628	21.77924	34.145	0.083984	-0.015137	0.16211	28.687	54.66	1322.806	-1.5676	1.0213	-0.16386	-45.7134	36.88307	16.647	0.049316	-0.041992	-0.15234	51.0845	35.948	13.1675	0.052978	-0.054162	0.12045
0.876	60.393	40.1907	1519.7025	-1.5771	1.0674	-0.56738	-44.513	-6.881	1113.789	-1.6393	0.73918	-0.061881	-0.695999999999998	12.4299	14.3853	0.1084	-0.064941	0.091797	-54.4216	37.883	28.2508	0.066406	0.013184	0.15381	64.887	67.495	1317.108	-1.5356	1.0057	-0.16348	-88.361	42.8792	-17.5535	0.040039	-0.025879	-0.15551	46.2435	-1.28	15.8904	0.074707	-0.062012	0.12012
0.878	33.169	25.199	1513.6175	-1.5605	1.0664	-0.55518	-78.535	-43.58	1151.296	-1.874	0.89377	-0.031541	-11.134	15.6567	3.761	0.13916	-0.097656	0.092773	-68.1986	31.5746	31.1056	0.057373	0.040284	0.14306	16.442	96.3708	1285.41506	-1.4956	0.99268	-0.16553	-69.3888	56.9652	7.1607	0.029297	-0.0073242	-0.1543	47.0888	-27.416	24.4552	0.10171	-0.072673	0.11619
0.88	28.50971	70.659	1511.2251	-1.5244	1.0664	-0.55127	-82.878	-73.115	1131.257	-2.092	1.0642	-0.010856	-2.594	6.4352	18.3358	0.15991	-0.11695	0.089844	0.529999999999994	-1.682	47.6441	0.04834	0.0625	0.13281	-7.438	87.173	1260.0171	-1.4512	0.97852	-0.16992	-70.19729	65.945	-0.181000000000001	0.013672	0.012695	-0.15283	41.189	50.117	14.7872	0.13135	-0.088432	0.11364
0.882	-41.9615	96.5014	1487.907	-1.502	1.0586	-0.53906	-189.6349	-108.722	1112.162	-2.2711	1.2527	0.00031757	59.1382	0.6437	28.82	0.18066	-0.14014	0.088867	-41.36	35.7102	13.073	0.040527	0.09375	0.12256	7.102	110.119	1255.8038	-1.4098	0.95821	-0.17578	-112.428	37.1396	12.6887	0.0087891	0.026367	-0.15283	38.387	3.89023	12.2458	0.16054	-0.1047	0.11477
0.884	-36.3	90.659	1494.82	-1.4526	1.0532	-0.52686	-182.628	-131.115	1148.162	-2.4165	1.4536	-0.0078125	20.2159	-1.35229	14.7095	0.20313	-0.16748	0.086426	4.715	38.5891	14.5319	0.033691	0.11084	0.11523	-70.8769	116.496	1233.8022	-1.3678	0.93994	-0.17764	-57.8207	33.498	15.9039	-0.0078125	0.050293	-0.1543	28.97	66.597	16.5114	0.18616	-0.12272	0.11307
0.886	-65.646	145.464	1471.4629	-1.4136	1.0361	-0.51611	-187.139	-92.472	1113.57	-2.4869	1.623	-0.039546	49.4633	-24.3643	35.615	0.21533	-0.17822	0.088379	44.191	41.31	28.0955	0.022949	0.13281	0.10498	-79.4506	107.8008	1222.9749	-1.3249	0.91807	-0.17959	-87.696	15.9541	-0.0590000000000011	-0.031739	0.067627	-0.16455	22.745	110.078	9.7721	0.20947	-0.13867	0.11133
0.888	-54.073	125.152	1445.546	-1.377	1.0137	-0.50391	-201.3606	-107.632	1052.609	-2.4672	1.7248	-0.088757	86.333	2.0891	4.246	0.22803	-0.1958	0.087402	10.413	60.158	21.05356	0.0036621	0.15039	0.086426	-68.607	151.888	1196.1118	-1.2872	0.88662	-0.18037	-81.812	-2.97	26.4699	-0.052734	0.082031	-0.17334	-6.804	32.399	18.807	0.22549	-0.1454	0.10563
0.89	-39.48378	107.895	1429.379	-1.3438	0.98828	-0.48047	-162.3631	-96.533	1018.85886	-2.3516	1.7196	-0.15079	46.346	5.6658	3.8761	0.23608	-0.2063	0.091553	57.3674	21.473	59.152	-0.016602	0.17334	0.069336	-99.168	151.876	1149.60503	-1.251	0.85547	-0.18359	-36.609	10.1865	62.8005	-0.07666	0.10938	-0.18457	-27.957	66.502	30.34829	0.23984	-0.15598	0.10547
0.892	-113.969	127.4807	1380.623	-1.3315	0.97314	-0.47119	-190.235	-55.298	1002.757	-2.139	1.6202	-0.21523	63.6317	20.4517	15.5753	0.24072	-0.21484	0.09082	56.4325	28.1201	72.22353	-0.044922	0.20166	0.049805	-73.65146	150.198	1143.3503	-1.212	0.82197	-0.18301	-74.04723	-5.6431	67.974	-0.09668	0.12402	-0.18408	-28.299	16.5199	21.5075	0.2462	-0.15899	0.10292
0.894	-98.535	82.027	1360.108	-1.3027	0.93555	-0.44824	-202.723	-56.473	1053.763	-1.8647	1.4536	-0.27295	40.0594	41.384	16.0041	0.23975	-0.2207	0.097168	37.5991	-11.7645	76.6005	-0.061035	0.21875	0.044434	-101.2667	168.6191	1103.277	-1.1741	0.79268	-0.18349	-36.554	3.67923	102.995	-0.15527	0.15479	-0.19043	-44.85	-21.9033	25.8328	0.25223	-0.15792	0.104
0.896	-100.4202	105.69	1330.489	-1.2778	0.91309	-0.42895	-155.694	-9.512	1039.3331	-1.5788	1.2458	-0.32808	30.514	19.4568	30.091	0.23779	-0.21924	0.10449	66.3695	-60.4666	124.9962	-0.11572	0.24805	0.030273	-108.706	160.989	1082.173	-1.1347	0.76025	-0.18076	9.154	48.36	139.822	-0.21753	0.18042	-0.19947	-76.3039	47.6427	7.1097	0.25098	-0.16162	0.10791
0.898	-127.15	111.385	1315.8998	-1.2554	0.88721	-0.41162	-192.42	-22.803	976.504	-1.3289	1.0469	-0.37812	49.7614	12.4351	19.90142	0.2334	-0.22021	0.10986	57.3767	-36.209	130.3287	-0.16797	0.26416	0.0048826	-71.4545	191.789	1077.306	-1.0954	0.73076	-0.17861	-23.807	52.362	222.9111	-0.29199	0.21484	-0.20654	-92.249	2.569	11.6194	0.24236	-0.15907	0.10092
0.9	-97.4807	71.007	1316.67	-1.2124	0.85596	-0.38623	-162.336	-89.639	985.294	-1.146	0.88351	-0.41317	-6.57	20.1863	0.8451	0.22583	-0.21534	0.11401	36.659	-45.9854	177.7676	-0.22998	0.27979	-0.030762	-84.805	220.331	1028.18	-1.0586	0.70508	-0.18018	27.4377	65.869	339.82895	-0.41357	0.27295	-0.22412	-86.5958	39.8325	30.9157	0.23068	-0.15019	0.10449
0.902	-94.7493	140.16232	1278.3764	-1.1929	0.84229	-0.37988	-162.357	-101.127	968.047	-1.0329	0.76567	-0.43957	7.115	18.72267	9.59	0.21582	-0.20996	0.11719	19.693	-33.798	234.418	-0.32129	0.30273	-0.070801	-77.137	177.148	1019.8174	-1.0258	0.67852	-0.17949	31.7156	82.889	416.218	-0.48584	0.30176	-0.22656	-93.157	66.5086	11.03	0.21259	-0.1424	0.10716
0.904	-70.9256	127.0858	1245.6031	-1.1499	0.8208	-0.36084	-171.343	-145.4053	985.298	-0.96631	0.69092	-0.46631	-2.665	30.328	-3.145	0.20264	-0.20117	0.12744	-44.811	-5.598	297.939	-0.37549	0.31738	-0.092285	-100.978	174.6378	995.581	-0.98594	0.65313	-0.17735	41.785	68.31354	530.202	-0.66748	0.37256	-0.22119	-87.638	6.487	34.1064	0.19195	-0.13322	0.10392
0.906	-56.2214	142.028	1246.3944	-1.1118	0.79834	-0.34521	-76.455	-174.9889	1011.82	-0.91342	0.6476	-0.49753	-87.248	34.9298	-4.5544	0.19336	-0.19531	0.13135	-15.34	-14.4265	450.183	-0.50586	0.35742	-0.12061	-138.476	156.539	970.4894	-0.95078	0.63554	-0.17148	130.209	73.793	661.699	-0.84497	0.44214	-0.21997	-99.557	60.1517	41.5547	0.16602	-0.11963	0.11084
0.908	-56.77076	202.231	1210.54908	-1.0747	0.77197	-0.32861	-92.125	-210.266	1008.816	-0.85857	0.60658	-0.51863	-37.8187	27.3223	-5.065	0.17139	-0.17578	0.14404	-44.533	41.4653	588.844	-0.62622	0.39087	-0.12574	-54.9222	150.835	968.921	-0.91348	0.61856	-0.16767	57.805	50.205	798.609	-1.0493	0.52783	-0.21631	-83.656	23.9772	40.8307	0.13585	-0.10114	0.11109
0.91	-13.531	154.5651	1196.8291	-1.0229	0.73096	-0.30713	-49.837	-284.17	1033.616	-0.79254	0.57922	-0.5331	-70.064	35.9487	-17.4477	0.1499	-0.15747	0.15308	-69.3707	38.938	705.441	-0.76904	0.43262	-0.13721	-41.1344	200.3664	952.276	-0.87695	0.59863	-0.16211	46.6855	62.955	926.8986	-1.3706	0.66455	-0.20557	-94.2012	-11.1089	60.552	0.10349	-0.077557	0.11468
0.912	3.15	188.196	1146.3278	-0.99365	0.71045	-0.29443	14.7064	-306.481	1062.274	-0.72337	0.56182	-0.53799	-87.615	26.683	17.04707	0.13086	-0.14014	0.15332	-23.439	-3.3922	792.468	-0.99121	0.51563	-0.14014	-8.728	194.8838	948.987	-0.83994	0.58056	-0.15879	72.9436	60.3546	1006.2004	-1.5425	0.74463	-0.19629	-73.0342	52.772	38.1899	0.069901	-0.052931	0.11659
0.914	-13.306	179.158	1090.449	-0.94287	0.66748	-0.27002	2.087	-312.925	1096.526	-0.65576	0.55225	-0.54443	-62.3871	30.6639	22.0866	0.104	-0.10889	0.1626	-55.699	0.121000000000002	855.555	-1.1055	0.56836	-0.1416	35.9389	193.054	921.273	-0.80586	0.55625	-0.15351	-15.443	5.175	1093.7739	-1.9097	0.9126	-0.17041	-63.2201	-9.7751	29.7558	0.037452	-0.024954	0.1168
0.916	26.508	134.3592	1089.4767	-0.90235	0.63526	-0.25684	80.679	-302.783	1182.8286	-0.5994	0.55547	-0.53467	-107.967	40.9269	0.702999999999999	0.089355	-0.10059	0.16699	-53.848	-27.058	965.687	-1.3496	0.67969	-0.13623	19.4806	214.382	865.3548	-0.76485	0.53516	-0.14922	-35.355	-39.436	1200.013	-2.1726	1.0574	-0.14746	-23.295	17.6619	40.307	0.0048828	0.0024414	0.11865
0.918	20.317	196.32	1036.1649	-0.86523	0.59961	-0.23682	108.827	-235.7885	1228.279	-0.56591	0.55674	-0.52861	-85.799	27.923	17.7828	0.063965	-0.070313	0.16992	-58.378	-12.748	1022.519	-1.5163	0.77563	-0.1167	87.343	174.5661	844.4193	-0.73018	0.50947	-0.14599	-66.359	-79.966	1228.075	-2.4194	1.2251	-0.11963	-14.027	54.409	27.15044	-0.023125	0.027712	0.11934
0.92	27.919	163.247	990.478	-0.82422	0.55664	-0.21875	79.9611	-216.212	1244.31	-0.55459	0.56963	-0.5165	-80.8636	29.957	22.6217	0.048584	-0.05249	0.17774	-113.747	-0.462	1004.014	-1.6772	0.86279	-0.098633	117.216	181.8977	802.8342	-0.69287	0.48682	-0.14209	-120.733	-146.468	1250.508	-2.7007	1.4868	-0.089355	-18.057	-6.2277	31.3887	-0.049392	0.050461	0.11397
0.922	27.688	159.582	976.45	-0.80078	0.5332	-0.20117	116.75	-175.393	1292.984	-0.5667	0.58389	-0.50615	-106.009	27.4871	27.128	0.031738	-0.029297	0.17969	-42.568	-63.157	970.253	-1.8457	0.98047	-0.071777	71.948	175.696	751.66419	-0.65537	0.45635	-0.14385	-155.738	-168.507	1264.643	-2.8062	1.6157	-0.095215	17.315	58.312	32.09302	-0.069319	0.076247	0.10928
0.924	-2.46	178.8259	929.6844	-0.76318	0.49463	-0.18018	99.53	-128.893	1296.544	-0.6001	0.60791	-0.48828	-27.555	9.0347	44.4723	0.012695	-0.0048828	0.18066	-23.746	-59.717	951.4806	-1.9121	1.0371	-0.053223	117.99	135.075	728.9945	-0.61533	0.42607	-0.14141	-225.06	-200.707	1268.805	-2.8867	1.8281	-0.11963	13.347	15.1092	22.331	-0.083983	0.099796	0.1084
0.926	9.218	103.462	917.4358	-0.73608	0.4646	-0.16309	77.0267	-167.089	1339.4004	-0.65126	0.6333	-0.46612	-50.70502	40.97	15.516	0.0043945	0.010254	0.18213	-25.443	-74.273	983.1035	-2.0015	1.1274	-0.039551	103.619	188.468	680.072	-0.5794	0.40264	-0.14218	-219.498	-207.557	1271.199	-2.8083	1.8806	-0.16407	32.664	-26.648	40.5873	-0.098145	0.12012	0.104
0.928	0.524000000000001	155.137	885.1262	-0.70459	0.43799	-0.15088	90.676	-149.686	1356.8875	-0.73036	0.65556	-0.44678	-61.964	32.3421	14.4004	-0.012695	0.035156	0.17676	28.356	-108.404	988.424	-2.0156	1.1792	-0.032471	62.316	175.22	671.298	-0.54102	0.37461	-0.13936	-199.55	-164.62	1184.913	-2.6167	1.8403	-0.22949	51.3537	21.1653	38.94715	-0.10957	0.13585	0.10195
0.93	-30.308	179.7124	835.2799	-0.66553	0.41064	-0.13037	33.934	-146.054	1343.8816	-0.82216	0.67979	-0.43076	-5.042	27.7189	33.709	-0.023193	0.051758	0.17822	24.9651	-93.907	928.4325	-1.9902	1.209	-0.029785	100.371	187.199	670.858	-0.50488	0.34424	-0.1377	-230.6158	-155.349	1110.9871	-2.1987	1.6548	-0.31104	47.5098	-29.953	42.519	-0.12774	0.15967	0.10205
0.932	-31.389	153.09912	830.092	-0.64014	0.396	-0.12842	43.84	-150.008	1367.163	-0.92802	0.7083	-0.41162	-30.739	27.4076	18.6868	-0.038086	0.069824	0.17578	43.534	-152.673	923.156	-1.8979	1.2017	-0.037598	67.023	228.632	612.3343	-0.46963	0.31885	-0.13916	-195.2416	-138.239	1111.6904	-1.9663	1.5298	-0.34424	41.6842	4.70607	51.014	-0.14376	0.16944	0.09619
0.934	-40.251	225.764	785.1114	-0.59521	0.3623	-0.10693	40.677	-105.177	1379.173	-1.0469	0.75391	-0.39648	11.708	5.1688	23.2819	-0.054199	0.097656	0.17139	76.797	-117.245	916.862	-1.8335	1.1802	-0.039063	72.641	172.6356	592.1995	-0.43926	0.29736	-0.1419	-247.879	-85.042	1085.754	-1.5645	1.2666	-0.3999	33.6291	25.8822	57.4868	-0.16855	0.18848	0.08486
0.936	-77.679	182.6584	759.5	-0.55615	0.34252	-0.094726	-39.042	-121.051	1432.855	-1.1706	0.8126	-0.36807	44.6281	16.1266	38.301	-0.05957	0.1084	0.16797	29.493	-9.742	891.25775	-1.6855	1.1152	-0.042969	55.3581	183.8	556.683	-0.40449	0.27431	-0.13916	-261.946	-85.142	1104.081	-1.3572	1.1033	-0.42773	31.702	-63.8036	79.276	-0.19385	0.2041	0.066406
0.938	-73.532	173.8503	745.634	-0.51416	0.31787	-0.080078	-16.294	-131.923	1509.474	-1.3081	0.89698	-0.33818	15.614	30.0713	38.432	-0.07373	0.13916	0.16211	91.141	17.286	894.53356	-1.57	1.0681	-0.029541	6.682	165.143	527.803	-0.37197	0.25049	-0.13486	-207.349	-42.843	1089.49167	-1.2202	0.97021	-0.44189	32.827	-22.703	101.3932	-0.22256	0.22392	0.054786
0.94	-84.4789	199.2151	676.479	-0.46436	0.29541	-0.062988	-72.8924	-130.16212	1520.6154	-1.4546	0.98643	-0.32686	61.1781	21.8627	64.784	-0.082764	0.15161	0.15234	79.954	53.354	883.688	-1.4648	1.041	-0.015137	37.09804	106.537	512.1043	-0.3418	0.22412	-0.12793	-238.019	-66.558	1035.153	-1.1328	0.87305	-0.47363	32.089	-42.001	84.789	-0.25879	0.24033	0.042579
0.942	-99.0809	133.867	646.886	-0.43945	0.2793	-0.060547	-113.632	-174.006	1564.816	-1.5987	1.081	-0.34414	47.0437	46.727	39.77	-0.091797	0.16602	0.14746	2.801	-0.782000000000011	898.3293	-1.3608	1.0327	0.02002	-13.855	151.073	442.8837	-0.31573	0.20156	-0.12617	-215.924	-109.437	1038.611	-1.0957	0.8457	-0.5	-7.759	-72.0029	140.311	-0.30019	0.26026	0.028516
0.944	-122.33	188.261	593.07	-0.38477	0.25293	-0.047852	-111.698	-147.113	1579.654	-1.7397	1.1646	-0.39014	53.2836	25.6693	26.5427	-0.091797	0.1875	0.1377	34.746	-75.845	908.7456	-1.3203	1.0371	0.03125	-48.2054	120.944	402.6594	-0.28652	0.17891	-0.11797	-199.736	-101.26	1003.524	-1.0034	0.78662	-0.52783	-36.39	-18.575	195.819	-0.35244	0.27197	0.007618
0.946	-127.549	175.637	521.024	-0.34986	0.23267	-0.041504	-164.646	-149.392	1586.656	-1.8589	1.2294	-0.454	74.7711	11.0015	34.5072	-0.091797	0.1958	0.12793	24.931	-108.474	883.895	-1.2598	1.0586	0.041992	-51.2334	125.9935	388.3333	-0.26465	0.15273	-0.1125	-199.683	-146.931	991.013	-0.91699	0.73779	-0.53028	-75.157	-67.076	278.158	-0.41016	0.2793	-0.027832
0.948	-105.7327	133.204	494.459	-0.31543	0.20752	-0.031738	-148.327	-147.435	1621.792	-1.9659	1.2982	-0.49638	19.758	18.169	27.44384	-0.08252	0.20703	0.098633	54.841	-183.5101	904.8406	-1.2127	1.0764	0.032227	-106.692	189.298	362.266	-0.24443	0.12539	-0.1166	-133.56304	-192.046	1040.095	-0.81934	0.68457	-0.52637	-72.344	-10.2505	405.482	-0.48252	0.29824	-0.060157
0.95	-132.839	196.1319	456.395	-0.27441	0.18799	-0.023438	-151.456	-106.0237	1609.286	-2.0831	1.3779	-0.52061	48.48166	-27.437	57.8872	-0.08081	0.21583	0.086182	88.1771	-205.694	913.193	-1.1538	1.0981	0.025391	-62.4812	158.4446	352.6561	-0.22168	0.10205	-0.10742	-89.9321	-225.761	1072.067	-0.70898	0.62305	-0.52734	-75.723	67.2924	533.526	-0.57003	0.31748	-0.091796
0.952	-126.891	155.0157	440.225	-0.25439	0.17334	-0.01416	-170.339	-124.798	1605.6862	-2.2079	1.4671	-0.52949	36.3311	-57.47	49.267	-0.075195	0.21875	0.072754	31.272	-217.6009	901.3207	-1.0718	1.1206	0.018066	-63.2673	179.943	317.279	-0.20273	0.071777	-0.10361	-78.7988	-328.582	1106.491	-0.65381	0.58838	-0.52686	-103.9585	14.4054	679.387	-0.67198	0.34639	-0.11094
0.954	-112.0335	180.9168	445.85671	-0.23389	0.15234	-0.003418	-126.713	-105.643	1610.2759	-2.3413	1.561	-0.54053	-22.896	-60.245	79.5711	-0.089844	0.229	0.04834	57.966	-255.94	951.094	-1.0425	1.1255	0.018555	-102.383	163.8111	293.678	-0.18369	0.047949	-0.10547	-7.735	-323.826	1140.674	-0.56396	0.53564	-0.52588	-85.5648	57.822	792.49	-0.81221	0.38428	-0.12402
0.956	-104.587	228.293	410.3068	-0.21875	0.13452	-0.0012207	-128.665	-61.3908	1585.64	-2.4485	1.6477	-0.55098	11.333	-54.6861	115.6663	-0.11499	0.23389	0.020752	39.0826	-238.637	982.586	-0.99609	1.1328	0.016113	-57.68	84.446	279.012	-0.17041	0.026075	-0.10078	24.358	-300.94	1157.294	-0.52124	0.51489	-0.50806	-88.608	18.5373	852.3	-0.98633	0.43213	-0.13672
0.958	-83.7913	166.1371	393.1332	-0.21387	0.12109	0.0078125	-108.709	-76.375	1605.1546	-2.4831	1.7271	-0.52285	-18.146	12.8009	130.041	-0.1499	0.24072	-0.0097656	-3.023	-263.24	1069.115	-0.98266	1.1291	0.019531	-96.319	136.9159	236.89	-0.15772	0.0016602	-0.096779	27.432	-287.335	1243.2388	-0.50586	0.50586	-0.48633	-50.862	-26.834	957.51	-1.1875	0.48399	-0.1417
0.96	-37.128	206.822	363.3788	-0.20654	0.10986	0.016113	-40.193	-30.9784	1611.7233	-2.5741	1.7563	-0.55528	-47.846	-4.40816	198.5561	-0.21484	0.26318	-0.05127	-2.841	-269.769	1150.3713	-0.98779	1.1216	0.031738	-98.37	114.587	210.8523	-0.14551	-0.016113	-0.092285	85.9165	-209.6682	1281.135	-0.54102	0.50781	-0.44922	-56.549	21.59	1029.733	-1.403	0.55791	-0.14854
0.962	-16.242	180.09725	313.5871	-0.20703	0.10645	0.017578	-42.5216	-23.8886	1591.644	-2.759	1.8355	-0.69688	-71.79	-0.491999999999999	296.099	-0.25391	0.2793	-0.065918	-84.937	-207.393	1165.2272	-1.0239	1.1196	0.038574	-45.916	117.3999	215.5283	-0.13916	-0.037402	-0.088867	75.781	-202.8287	1306.435	-0.58887	0.51465	-0.43018	-91.748	-57.781	1053.33	-1.6331	0.63799	-0.14697
0.964	4.58799999999999	134.269	301.9592	-0.20215	0.10742	0.027832	4.694	-30.2022	1604.988	-2.769	1.9263	-0.72803	-115.7695	36.27992	394.182	-0.3584	0.31055	-0.10547	-112.438	-181.5259	1224.549	-1.0474	1.1138	0.037109	-64.0565	164.43	180.9763	-0.13076	-0.054102	-0.084375	98.278	-189.597	1353.847	-0.72412	0.55713	-0.40967	-48.4142	-64.9646	1033.418	-1.8475	0.72773	-0.13808
0.966	9.515	189.826	262.353	-0.20044	0.10254	0.029786	32.1491	1.894	1610.528	-2.686	1.9168	-0.69805	-75.705	28.653	565.99	-0.46801	0.34375	-0.11426	-113.46	-123.632	1224.966	-1.0854	1.1001	0.028809	-26.756	107.4995	174.2871	-0.12334	-0.071289	-0.08125	101.331	-151.05	1364.8482	-0.90186	0.61279	-0.40186	7.1368	-41.075	1003.969	-2.0464	0.82471	-0.11963
0.968	16.691	137.3847	244.432	-0.2002	0.10547	0.033203	8.2693	-18.145	1628.9701	-2.5735	1.8786	-0.67949	-75.9937	27.165	669.955	-0.59717	0.38672	-0.12646	-162.6	-104.696	1216.9881	-1.1055	1.0986	0.010498	-1.715	141.825	149.5836	-0.11065	-0.08457	-0.074219	66.144	-184.447	1413.8361	-0.99805	0.64844	-0.39697	26.74	-91.249	1031.651	-2.2028	0.93115	-0.10576
0.97	31.377	140.482	257.4577	-0.19678	0.10596	0.043457	80.226	-20.529	1659.57	-2.4316	1.8156	-0.68457	-141.459	-4.437	746.121	-0.8125	0.46289	-0.13379	-82.723	-122.927	1253.126802	-1.1201	1.0879	-0.0029297	-12.2488	127.2779	133.472	-0.10156	-0.099121	-0.072266	89.0667	-139.889	1420.5513	-1.187	0.73877	-0.38037	55.08	-50.707	1040.662	-2.3027	1.0368	-0.089746
0.972	33.907	177.141	219.9206	-0.19287	0.10596	0.046875	77.338	0.734000000000002	1643.9192	-2.2622	1.7249	-0.69502	-82.3503	-29.8405	826.568	-0.93164	0.50977	-0.13281	-66.598	-84.538	1275.246	-1.1333	1.0708	-0.01709	48.9562	52.1783	161.1469	-0.094141	-0.11279	-0.069629	42.452	-116.049	1406.049	-1.3296	0.81103	-0.34619	65.6624	-77.298	1030.4937	-2.3135	1.1399	-0.072168
0.974	38.198	109.7994	217.843	-0.19043	0.10889	0.05127	63.7227	-46.3764	1637.5472	-2.1055	1.6113	-0.7041	-93.706	4.651	897.893	-1.1948	0.62744	-0.11719	-79.09	-75.775	1320.464	-1.1426	1.0684	-0.027344	52.42242	85.34	123.0854	-0.076367	-0.12295	-0.065723	13.303	-119.826	1423.048	-1.4668	0.90625	-0.32764	90.56	-122.457	1018.607	-2.2341	1.2214	-0.055273
0.976	58.4139	152.084	179.8037	-0.18506	0.10791	0.060059	121.899	-18.583	1617.9142	-1.9785	1.491	-0.70332	-95.733	5.562	979.351	-1.4013	0.72168	-0.10303	-20.83033	-85.38697	1371.059	-1.1641	1.0488	-0.046875	66.078	38.2111	97.3298	-0.070508	-0.13858	-0.062598	-0.748999999999995	-76.936	1439.446	-1.6357	1.041	-0.34131	121.649	-63.2309	1012.283	-2.0723	1.2578	-0.037598
0.978	46.8462	139.151	162.2405	-0.18018	0.10645	0.064941	103.676	-18.6009	1604.313	-1.8827	1.3839	-0.69326	-52.993	-13.816	1006.64	-1.6064	0.83008	-0.079102	-63.6114	-98.5648	1383.916	-1.1822	1.0361	-0.055908	83.525	42.446	88.2887	-0.054297	-0.1499	-0.060449	-58.725	-102.973	1476.175	-1.7012	1.0977	-0.36768	101.232	-53.668	996.7757	-1.8556	1.2526	-0.037305
0.98	32.889	103.927	180.001	-0.17236	0.11377	0.07373	120.708	-26.0125	1627.761	-1.8174	1.3023	-0.68115	-63.759	-49.9372	975.243	-1.853	0.98682	-0.047363	-61.08189	-150.149	1431.8472	-1.1992	1.0176	-0.063965	49.0695	105.158	89.5526	-0.039063	-0.15918	-0.05957	-51.707	-114.564	1548.692	-1.8125	1.1895	-0.44873	121.491	10.434	998.979	-1.6156	1.2032	-0.044141
0.982	39.396	164.986	153.6814	-0.16235	0.11377	0.078613	104.479	2.4755	1615.637	-1.7712	1.2454	-0.66807	28.091	-121.135	995.721	-1.959	1.0615	-0.03125	-16.676	-146.587	1478.057	-1.2324	0.99219	-0.055664	71.5896	71.479	100.551	-0.029004	-0.17032	-0.059668	-87.2343	-94.728	1559.7539	-1.8745	1.2422	-0.49463	127.068	72.657	987.2782	-1.3914	1.1164	-0.050781
0.984	37.272	107.5833	129.9672	-0.15186	0.11182	0.083984	73.75	-26.8279	1596.528	-1.7378	1.2036	-0.65771	80.2976	-114.936	1005.6685	-2.1309	1.2109	-0.010742	-57.554	-133.768	1492.291	-1.2437	0.97705	-0.058594	74.992	104.975	85.8377	-0.017578	-0.17636	-0.057422	-131.264	-160.374	1588.15	-1.9507	1.2896	-0.52783	78.178	9.709	987.219	-1.2007	1.0212	-0.054785
0.986	21.663	107.2672	133.6251	-0.13721	0.11572	0.088867	91.726	2.266	1585.217	-1.7156	1.1799	-0.64512	39.85	-132.141	1018.942	-2.1892	1.3186	-0.015137	-43.9076	-153.516	1556.894	-1.293	0.94336	-0.084961	55.45953	105.0831	57.3667	-0.009375	-0.18184	-0.053907	-131.72	-146.318	1615.628	-2.0776	1.354	-0.55566	48.977	-8.729	989.4651	-1.0586	0.92188	-0.058105
0.988	-10.591	136.014	103.31916	-0.12842	0.11182	0.093262	54.3998	62.92792	1553.8293	-1.6949	1.1626	-0.63193	94.297	-153.056	1019.829	-2.2007	1.4067	-0.018066	-0.352	-112.043	1571.6	-1.3652	0.93946	-0.11914	52.6885	30.0733	70.2561	-0.0014649	-0.18496	-0.051758	-172.575	-161.775	1607.816	-2.1563	1.3906	-0.5625	40.921	-84.679	961.308	-0.95742	0.85664	-0.050098
0.99	-35.676	81.0201	115.492	-0.10889	0.11035	0.098145	17.88	65.4818	1560.288	-1.6745	1.1493	-0.62412	112.444	-136.247	1003.115	-2.1021	1.4673	-0.041992	7.016	-129.5495	1592.641	-1.4487	0.95361	-0.15625	12.184	67.2842	49.02	0.0078125	-0.18799	-0.049805	-158.696	-183.331	1636.479	-2.3066	1.4727	-0.57227	75.7026	-183.028	971.5634	-0.88828	0.81504	-0.048047
0.992	-41.3737	111.682	101.74	-0.096192	0.10864	0.10059	18.495	122.091	1545.6486	-1.6413	1.1493	-0.61201	121.981	-122.6667	994.87	-2.0078	1.4688	-0.044434	74.861	-138.3179	1609.104	-1.6206	0.99268	-0.20654	4.967	25.6996	42.1802	0.010644	-0.1836	-0.041308	-145.76	-105.9236513	1633.537	-2.4099	1.5393	-0.59008	57.652	-180.498	983.1105	-0.84609	0.79824	-0.051953
0.994	-63.9444	68.5085	66.0238	-0.082031	0.10645	0.10352	-74.343	138.844	1498.691	-1.6069	1.1431	-0.60303	170.311	-71.777	973.60582	-1.7656	1.4336	-0.041504	91.207	-106.675	1582.28	-1.73	1.0356	-0.2334	0.692999999999998	8.03001	44.6306	0.009375	-0.17666	-0.034571	-182.32	-111.8791	1629.667	-2.5093	1.604	-0.61182	59.7034	-238.422	989.6176	-0.81103	0.80225	-0.058106
0.996	-81.7003	-0.423	69.065	-0.060059	0.10059	0.10547	-69.705	124.472	1499.1538	-1.5651	1.1325	-0.59004	129.992	0.039999999999992	950.16	-1.5837	1.3908	-0.031738	77.834	-136.5162	1584.628	-1.9785	1.1621	-0.27344	-41.497	60.818	30.21259	0.0058594	-0.17353	-0.023633	-162.247	-102.9703	1625.6192	-2.6011	1.6997	-0.63428	58.1796	-258.942	1028.1554	-0.77832	0.8125	-0.064453
0.998	-92.897	33.4439	40.46	-0.053711	0.099121	0.10645	-72.981	146.363	1488.4984	-1.5301	1.1211	-0.57774	137.973	-19.507	958.613	-1.4316	1.3418	-0.018066	109.464	-109.5783	1563.8008	-2.2358	1.3403	-0.28076	-48.7459	7.2092	47.7709	0.00029296	-0.16748	-0.0089846	-123.438	-63.43502	1583.589	-2.623	1.7383	-0.65039	19.1614	-233.629	1034.063	-0.76348	0.84668	-0.05459
1	-110.397	-10.256	28.68	-0.037598	0.084473	0.11182	-134.552	113.392	1463.5628	-1.4957	1.1125	-0.56367	122.736	-50.158	956.4431	-1.3008	1.2871	-0.0048828	77.57	-73.295	1539.9954	-2.3608	1.4341	-0.27686	-62.7682	44.587	50.2479	-0.010254	-0.1665	0.0039063	-136.294	-112.559	1571.193	-2.6016	1.7871	-0.66309	-22.74532	-299.386	1078.105	-0.76758	0.87969	-0.051367
1.002	-75.99486	20.699	44.397	-0.031738	0.072265	0.11499	-103.728	102.5304	1446.0545	-1.4688	1.0957	-0.54903	27.1641	-110.967	948.9735	-1.2617	1.2617	0.003418	92.947	-83.896	1560.404	-2.5879	1.623	-0.25195	-103.495	50.8035	34.8482	-0.022461	-0.16016	0.0099608	-66.107418	-59.119	1577.578	-2.5147	1.7891	-0.65137	-28.112	-255.095	1143.2532	-0.8043	0.91328	-0.039648
1.004	-91.188	56.862	30.052	-0.017578	0.060547	0.11963	-133.093	134.2193	1394.319	-1.4453	1.0762	-0.5332	84.534	-169.6741	963.4553	-1.2285	1.2207	0.025391	79.7045	-52.1038	1533.0546	-2.697	1.7561	-0.22778	-73.7585	-14.127	47.7119	-0.030567	-0.1501	0.021778	-37.409	-44.9008	1580.99	-2.4082	1.7773	-0.65039	-90.94	-219.511	1182.393	-0.86806	0.94717	-0.047558
1.006	-113.49	1.811	48.29	-0.0083008	0.038574	0.11182	-152.773	93.923	1365.935	-1.4227	1.0531	-0.51836	111.393	-174.683	955.014	-1.2127	1.1995	0.032227	26.48	-49.554	1515.654	-2.7529	1.8643	-0.20898	-104.467	34.169	36.1599	-0.03877	-0.14346	0.031934	-12.968	-47.5974	1596.4256	-2.23	1.7173	-0.64795	-129.413	-219.736	1237.254	-0.95117	0.9707	-0.079102
1.008	-59.7302	47.453	55.476	-0.0053711	0.02832	0.12012	-97.265	108.268	1341.987	-1.4015	1.0314	-0.50185	71.531	-205.0441	974.78	-1.1948	1.1782	0.030762	16.145	-21.7983	1543.817	-2.6777	1.9551	-0.17334	-112.493	-19.619	23.4935	-0.050586	-0.13672	0.03877	35.5521	23.718	1593.2105	-2.1519	1.6685	-0.64795	-140.665	-135.7	1245.116	-1.0284	0.99151	-0.10752
1.01	-51.03896	30.9587	21.157154	0.012207	0.0073242	0.1167	-150.062	127.019	1319.24	-1.3768	1.0067	-0.48428	99.695	-191.581	1007.5303	-1.1323	1.1392	0.027344	-25.328	32.673	1539.926	-2.5366	1.9673	-0.12988	-76.0614	-46.402	20.4655	-0.056152	-0.13037	0.045898	33.3315	-18.764	1597.0318	-2.0703	1.5605	-0.68359	-149.514	-144.396	1209.85	-1.1015	1.0116	-0.14737
1.012	-77.7961	-5.9976	23.119	0.030274	-0.0083007	0.11353	-115.0237	121.899	1299.9534	-1.3427	0.97998	-0.46806	64.198	-183.35	995.545	-1.0898	1.1211	0.020508	-39.443	9.686	1599.2733	-2.5034	1.9106	-0.22607	-125.335	13.802	-1.893	-0.0625	-0.12158	0.055664	84.984	-24.0905	1613.822	-1.998	1.4863	-0.66235	-107.723	-128.383	1227.81	-1.1589	1.026	-0.17744
1.014	-46.1464	41.053	19.845	0.045898	-0.025879	0.10938	-80.6781	159.9171	1286.331	-1.3047	0.95508	-0.45508	44.549	-254.007	1046.814	-0.98584	1.0747	0.016113	-24.703	18.698	1605.1237	-2.3875	1.9095	-0.29175	-90.8038	-19.5777	35.794	-0.069532	-0.11865	0.061328	89.83	-3.112	1614.2025	-1.9297	1.4063	-0.63281	-99.602	-85.417	1254.493	-1.2075	1.0323	-0.20517
1.016	-33.905	-10.6726	11.487	0.074707	-0.05127	0.1001	-109.162	174.9849	1257.4964	-1.2665	0.92822	-0.43232	-6.353	-272.342	1079.45	-0.91675	1.0389	0.010498	-99.984	3.174	1572.531	-2.1836	1.834	-0.23828	-81.56518	33.591	35.171	-0.075391	-0.11201	0.06875	68.04584	-64.728	1600.6545	-1.8789	1.3223	-0.60742	-90.222	-146.142	1305.602	-1.2378	1.0376	-0.22412
1.018	-12.093	-2.423	9.537	0.092773	-0.068848	0.099121	-71.7224	173.2619	1249.468	-1.2264	0.90283	-0.41055	-60.6696	-315.802	1134.50252	-0.86133	1	0.0073242	-98.4661	-34.001	1587.2377	-1.9688	1.6406	-0.16211	-92.587	51.6973	24.438	-0.083984	-0.10742	0.072656	102.957	-38.9596	1582.1822	-1.8613	1.293	-0.59961	-63.657	-121.9309	1335.667	-1.2528	1.03	-0.2417
1.02	17.271	15.795	1.61	0.12988	-0.099121	0.09375	-53.777	215.1	1208.7023	-1.1827	0.87002	-0.38985	-34.689	-291.799	1216.032	-0.80664	0.95703	-0.0058594	-89.367	-12.9605	1580.7818	-1.8999	1.5708	-0.16113	-43.0765	-2.2062	28.6338	-0.083496	-0.10205	0.078613	117.962	-50.8249	1564.072	-1.8242	1.2559	-0.58447	-72.3693	-133.487	1333.94	-1.2636	1.0136	-0.26631
1.022	25.859	-32.0667	8.95496	0.15796	-0.12134	0.08374	-25.781	201.292	1176.5014	-1.1426	0.83789	-0.37442	-79.194	-197.8963	1212.529	-0.78857	0.93994	-0.012207	-140.27	-31.316	1589.7201	-1.7988	1.4512	-0.16699	-35.232	54.286	2.943	-0.089356	-0.10059	0.077734	112.196	-76.714	1579.933	-1.8025	1.2376	-0.57007	-30.439	-200.063	1367.1668	-1.2585	0.99054	-0.29873
1.024	33.219	19.0036	38.617	0.18604	-0.14209	0.083496	15.516	216.762	1181.553	-1.0991	0.80713	-0.35303	-140.683	-172.831	1227.925	-0.77881	0.90674	-0.024414	-96.912	-42.473	1593.04	-1.7263	1.3865	-0.1582	-26.365	15.9868	10.755	-0.091699	-0.09834	0.075293	125.42	-25.437	1560.2	-1.7847	1.2251	-0.56104	-20.823	-160.351	1388.924	-1.2502	0.96113	-0.31651
1.026	44.6762	29.6049	18.0403	0.22314	-0.17236	0.078125	-24.869	227.07	1135.15401	-1.0619	0.775	-0.33633	-93.816	-132.421	1236.67	-0.78174	0.87744	-0.041016	-114.575	-14.191	1549.4412	-1.6733	1.3149	-0.14795	25.762	-10.4278	16.91342	-0.091699	-0.096778	0.084668	86.346	-32.0784	1524.7931	-1.7578	1.2168	-0.54688	-9.5048	-178.999	1408.17	-1.2461	0.93164	-0.34082
1.028	49.152	-2.704	20.9965	0.23877	-0.18799	0.074707	33.137	198.994	1100.0463	-1.0262	0.74141	-0.31993	-112.605	-122	1214.366	-0.79199	0.85156	-0.060547	-129.78	-29.196	1543.8897	-1.6401	1.2349	-0.13232	5.452	37.535	-13.8782	-0.087793	-0.097168	0.082812	76.955	8.336	1526.9807	-1.7437	1.2192	-0.54248	-4.757	-165.54	1415.616	-1.2582	0.90176	-0.36015
1.03	61.4322	30.773	-0.40553	0.26172	-0.21143	0.07959	55.504	220.129	1050.006	-0.99258	0.7125	-0.30157	-77.751	-156.34	1281.4045	-0.82373	0.81689	-0.087402	-104.6543	13.9598	1538.8743	-1.6187	1.2046	-0.12109	29.962	-18.0046	5.3312	-0.078125	-0.096191	0.080566	57.9934	80.115	1526.783663	-1.7075	1.2075	-0.5376	10.3973	-111.292	1442.628	-1.2902	0.88955	-0.37598
1.032	47.9128	-21.839	10.5426	0.28003	-0.23047	0.070557	33.518	215.8403	1023.307	-0.96397	0.67979	-0.2832	-40.4529	-143.529	1318.607	-0.84668	0.80469	-0.09668	-160.581	60.465	1521.6323	-1.5898	1.1602	-0.11621	39.476	32.9553	7.6025	-0.067383	-0.1002	0.075781	-0.917999999999999	57.9231	1524.585	-1.6736	1.1936	-0.53003	38.4793	-162.6005	1477.207	-1.3456	0.90517	-0.3709
1.034	39.012	-2.163	25.0947	0.29541	-0.24414	0.068359	78.488	173.8634	1022.1818	-0.93164	0.65332	-0.26465	-81.601	-180.929	1354.546	-0.89746	0.79492	-0.11035	-129.7279	74.023	1523.973	-1.5708	1.1342	-0.12183	44.6031	54.068	11.8053	-0.054883	-0.098828	0.071387	21.469	93.59	1499.08	-1.6362	1.1743	-0.52295	75.428	-128.712	1501.156	-1.4363	0.94775	-0.36377
1.036	42.6327	47.8213	9.114	0.31055	-0.25732	0.068359	20.309	197.66	982.9239	-0.90508	0.62402	-0.24433	-15.279	-192.349	1360.8003	-0.94703	0.79761	-0.12304	-99.2991	126.045	1511.2242	-1.5488	1.1113	-0.12598	83.04	2.8448	35.255	-0.038086	-0.099219	0.065527	-38.9944	115.376	1451.229	-1.5781	1.1484	-0.50195	94.821	-94.764	1485.874	-1.5542	1.019	-0.34326
1.038	27.411	10.4878	9.88	0.31543	-0.25781	0.067383	9.503	167.0927	952.966	-0.875	0.59629	-0.23487	-1.138	-174.524	1336.307	-1	0.80664	-0.13916	-100.506	120.479	1487.4043	-1.5293	1.0811	-0.12695	45.6258	61.689	11.0421	-0.020605	-0.10234	0.057617	-103.351	101.4316	1426.092	-1.5601	1.1323	-0.49658	104.886	-129.052	1488.766	-1.7024	1.1129	-0.32422
1.04	10.39	57.775	15.1523	0.32813	-0.25781	0.067383	21.691	173.3473	939.717	-0.84531	0.57597	-0.21026	-22.8967	-194.613	1373.072	-1.0894	0.83057	-0.18604	-53.825	112.42	1487.6915	-1.5176	1.0645	-0.11719	31.236	19.8734	16.2792	-0.0048828	-0.1001	0.05127	-81.331	151.562	1419.107	-1.5132	1.0913	-0.479	101.372	-66.794	1463.05	-1.8519	1.2212	-0.30127
1.042	-13.621	52.459	8.233	0.32666	-0.25586	0.066894	-28.675	200.1237	904.568	-0.81015	0.55117	-0.19414	27.7815	-146.742	1411.942	-1.1362	0.84814	-0.21826	-51.726	144.493	1438.0105	-1.502	1.0449	-0.12109	31.789	-8.28083	30.2361	0.010156	-0.10518	0.04414	-143.106	142.436	1381.843	-1.477	1.061	-0.4585	84.418	-83.3688	1416.039	-1.9956	1.3353	-0.28096
1.044	-29.166	16.5321	24.7753	0.32422	-0.25	0.070313	-24.27	180.421	892.265	-0.77734	0.5249	-0.17676	-2.807	-129.4346	1423.713	-1.2524	0.89893	-0.2793	-14.484	122.3323	1417.931	-1.4783	1.0257	-0.12402	5.37	43.3944	8.0829	0.020898	-0.10693	0.033594	-141.383	129.0888	1381.5419	-1.4395	1.0293	-0.44434	74.3927	-78.3115	1419.7412	-2.1212	1.4464	-0.26025
1.046	-15.037	61.011	7.1635	0.31445	-0.24365	0.074707	-42.594	210.6394	847.567	-0.7375	0.5002	-0.16055	19.4054	-155.4526	1452.054	-1.3755	0.9624	-0.30224	34.78	135.886	1406.5998	-1.4531	1.0098	-0.12793	5.046	-10.6608	15.4675	0.029101	-0.10889	0.024219	-124.059	129.865	1349.975	-1.3813	0.98877	-0.42725	49.438	-14.5524	1428.3211	-2.2266	1.543	-0.24805
1.048	-53.2172	4.2193	-2.0377	0.30615	-0.23438	0.080566	-97.8036	220.511	774.9235	-0.69844	0.4706	-0.1457	83.671	-132.471	1489.477	-1.5234	1.043	-0.31348	9.075	121.701	1366.102	-1.4219	0.98047	-0.125	-25.051	32.44	12.6329	0.03125	-0.10469	0.014258	-167.116	66.929	1336.2104	-1.353	0.96533	-0.41748	20.396	-55.7853	1430.1455	-2.301	1.6259	-0.23027
1.05	-81.8632	12.2733	15.8169	0.2915	-0.21973	0.074707	-78.7354	176.833	767.972	-0.65898	0.4456	-0.13086	63.986	-171.928	1513.374	-1.7852	1.1953	-0.31055	31.003	81.0981	1367.0019	-1.4019	0.97119	-0.125	-25.734	63.893	5.9739	0.034668	-0.10938	0.0019531	-133.762	90.989	1323.486	-1.293	0.92969	-0.41211	-5.577	-21.647	1465.147	-2.3409	1.6802	-0.2086
1.052	-92.496	43.0635	5.753	0.27124	-0.20923	0.077881	-105.63895	221.6083	725.5962	-0.61543	0.41719	-0.11524	117.969	-176.5769	1512.525	-1.9331	1.2886	-0.3125	45.448	87.7287	1366.1601	-1.3589	0.95361	-0.12891	-10.945	19.718	32.36462	0.030859	-0.10146	-0.0042969	-155.821	124.3286	1268.447	-1.2437	0.8999	-0.39795	-64.7156	18.16	1454.89	-2.3327	1.7032	-0.18594
1.054	-84.2905	8.876	1.804	0.25146	-0.19287	0.08252	-153.314	184.492	683.299	-0.57031	0.38867	-0.097656	95.588	-125.2269	1480.2612	-2.2339	1.5024	-0.30176	19	87.0941	1341.7533	-1.3315	0.94238	-0.12793	-65.56718	82.09	39.1317	0.032031	-0.097559	-0.0094726	-150.555	113.062	1246.604	-1.1934	0.86328	-0.38574	-59.2543	-27.697	1491.2763	-2.3571	1.6897	-0.19199
1.056	-62.52863	57.6253	16.852	0.2207	-0.1665	0.092773	-127.3181	161.7643	638.1935	-0.52822	0.36094	-0.08418	64.102	-122.472	1447.115	-2.4373	1.6702	-0.29443	28.153	88.5451	1328.67	-1.3003	0.93213	-0.12549	-85.782	43.9281	34.00932	0.030469	-0.089355	-0.016114	-83.989	151.5157	1227.666	-1.1279	0.82031	-0.37109	-53.844	19.064	1506.9239	-2.3979	1.6802	-0.23486
1.058	-98.041	46.4929	12.2618	0.2002	-0.15332	0.091797	-161.783	183.4766	579.484	-0.48086	0.32774	-0.070605	112.691	-77.71474	1451.0374	-2.5991	1.8286	-0.28467	9.252	119.648	1290.3265	-1.252	0.91211	-0.13232	-59.4117	15.3146	36.7172	0.029004	-0.085938	-0.025391	-115.6263	142.498	1213.968	-1.103	0.79932	-0.35938	-128.737	-15.401	1491.68624	-2.3644	1.6516	-0.22608
1.06	-105.475	23.4735	38.96	0.16309	-0.12305	0.094238	-147.556	140.645	551.918	-0.4336	0.30156	-0.061231	60.0403	-52.6828	1452.29808	-2.709	1.9922	-0.26074	-12.405	108.97276	1247.1481	-1.2305	0.90234	-0.13281	-106.638	62.9183	24.778	0.026855	-0.07666	-0.035156	-75.001	146.745	1210.234	-1.0508	0.75488	-0.33984	-142.706	-48.863	1509.0149	-2.2938	1.5875	-0.19453
1.062	-55.7316	64.846	51.4457	0.13086	-0.10156	0.093018	-144.379	170.92908	515.969	-0.38925	0.27012	-0.052149	24.108	-66.748	1476.481	-2.7148	2.0449	-0.24316	22.909	125.0391	1236.29638	-1.1738	0.88379	-0.13574	-104.257	7.699	27.19705	0.026855	-0.071484	-0.047265	-44.7	196.361	1176.98	-1.0223	0.71997	-0.32129	-137.176	-11.689	1498.5768	-2.211	1.5156	-0.16289
1.064	-76.797	20.7056	34.522	0.10303	-0.073242	0.09375	-157.969	205.0093	474.976	-0.33936	0.24463	-0.035156	51.521	-38.5725	1474.118	-2.5601	2.0288	-0.13477	-32.842	154.89725	1197.9329	-1.1296	0.8645	-0.13965	-101.5329	26.8921	38.8915	0.029395	-0.0625	-0.053418	-53.581	187.205	1167.08	-0.99805	0.69434	-0.30078	-146.147	-35.979	1504.307	-2.1247	1.446	-0.15078
1.066	-75.0775	17.8984	50.167	0.070801	-0.037109	0.099121	-117.409	153.1894	458.08	-0.30137	0.21494	-0.027832	-17.166	-52.9576	1471.071	-2.7105	2.0767	-0.33106	-0.207000000000001	139.376	1204.324	-1.0879	0.84375	-0.13574	-118.532	41.81994	35.2673	0.03252	-0.052735	-0.064746	24.799	198.237	1156.249	-0.96729	0.65967	-0.27588	-114.602	14.162	1511.281	-2.0308	1.3833	-0.14307
1.068	-31.252	36.784	35.8289	0.053711	-0.01709	0.098145	-117.536	195.578	433.876	-0.25859	0.1872	-0.021191	-60.4913	-47.696	1502.971	-2.6401	2.1479	-0.3877	12.089	169.7641	1181.6382	-1.0259	0.81104	-0.14404	-83.1872	-12.62233	44.934	0.0375	-0.041601	-0.071289	-5.468	206.916	1085.4631	-0.95313	0.64453	-0.26172	-136.99	31.246	1490.2768	-1.9415	1.3292	-0.13486
1.07	-46.1504	-10.3836	17.0798	0.024902	0.018066	0.094238	-114.087	161.8568	416.0301	-0.21797	0.16533	-0.0098633	-69.2324	-14.204	1495.555	-2.4292	2.0806	-0.28174	-61.2656	188.237	1120.008	-0.99365	0.79346	-0.14502	-79.9828	54.228	26.6263	0.039063	-0.03418	-0.080566	13.702	168.513	1035.7013	-0.92578	0.62109	-0.24756	-143.192	-11.437	1496.05	-1.8671	1.2802	-0.13389
1.072	-9.847	42.269	17.023	0.0012207	0.04126	0.094482	-54.329	142.6186	397.8346	-0.18262	0.13965	-0.00048826	-97.2113	-33.422	1497.438	-2.3379	2.0059	-0.22705	-40.758	176.7412	1095.1912	-0.93066	0.75391	-0.14258	-68.7032	15.2938	36.78812	0.050293	-0.023828	-0.095411	63.176	170.509	993.441	-0.9038	0.60205	-0.22753	-156.789	50.046	1475.2585	-1.7984	1.2364	-0.13154
1.074	5.182	32.011	17.373	-0.022949	0.071289	0.091309	-41.522	181.0333	348.01523	-0.15088	0.11621	0.0097656	-96.5349	-16.657	1505.6492	-2.2012	1.8945	-0.17969	-45.982	217.969	1057.935	-0.88452	0.71704	-0.14233	-42.721	-3.8288	41.5818	0.057715	-0.019531	-0.10205	11.001	157.7536	972.3387	-0.875	0.57813	-0.20605	-142.564	41.307	1453.5608	-1.7324	1.2066	-0.11523
1.076	-6.792	8.3379	49.756	-0.051758	0.10986	0.088379	-7.36	120.105	339.9382	-0.12705	0.090041	0.02207	-157.592	-19.40173	1511.385	-2.0906	1.8206	-0.17212	-81.497	203.8139	1023.1377	-0.8374	0.68018	-0.14746	-28.656	50.2074	21.874	0.065137	-0.012109	-0.1126	17.905	147.218	978.816	-0.82617	0.54395	-0.18115	-122.4919	35.915	1455.735	-1.6792	1.1782	-0.11865
1.078	36.8979	49.349	55.166	-0.070313	0.12793	0.087402	5.36799999999999	140.0343	316.5989	-0.11221	0.066406	0.030567	-151.177	-39.9463	1529.1383	-1.9878	1.7349	-0.16699	-60.9684	189.382	1001.5389	-0.77539	0.63184	-0.1499	-13.405	-18.9255	53.6935	0.067188	-0.0045899	-0.12442	34.436	173.43	945.6545	-0.79883	0.52246	-0.17236	-124.0945	89.291	1450.2583	-1.6343	1.144	-0.12823
1.08	49.622	-2.4745	23.6692	-0.10254	0.17285	0.082031	3.293	146.2753	269.907	-0.096972	0.046875	0.039551	-88.9	-3.997	1530.9225	-1.8711	1.5996	-0.1416	-116.661	209.799	947.196	-0.74561	0.61377	-0.14893	9.258	-8.6136	73.0553	0.069824	-0.0024414	-0.14111	-5.248	150.843	894.5876	-0.74658	0.48193	-0.14697	-95.9584	59.067	1439.7274	-1.5909	1.12	-0.12422
1.082	44.226	10.1153	48.186	-0.12354	0.20728	0.076904	71.7157	103.4109	264.06	-0.087207	0.028125	0.04834	-142.824	-1.893	1512.9196	-1.8276	1.5298	-0.11768	-103.602	162.7453	945.5558	-0.6875	0.56738	-0.15381	-10.976	-11.335	83.9105	0.058204	0.0046875	-0.14814	20.332	151.3912	889.047	-0.69654	0.45215	-0.1316	-72.742	90.269	1417.621	-1.553	1.0821	-0.12109
1.084	47.4238	35.486	39.147	-0.14502	0.24414	0.075684	51.329	168.014	227.437	-0.081055	0.0083008	0.057617	-113.5855	-23.087	1538.1087	-1.7632	1.4048	-0.085449	-80.998	186.847	949.9317	-0.64599	0.53637	-0.15601	19.682	-58.4121	119.057	0.037402	0.018164	-0.1458	-24.199	179.284	866.891	-0.65039	0.4209	-0.12012	-42.729	105.9036	1386.3199	-1.5143	1.0513	-0.11201
1.086	40.046	-8.2189	51.703	-0.17578	0.29199	0.078613	47.2847	140.054	208.92725	-0.077734	-0.0067383	0.065918	-112.2907	-6.084	1519.1664	-1.7271	1.336	-0.072754	-93.733	198.087	903.40891	-0.60693	0.50732	-0.15967	49.58	16.675	131.3806	-0.00048832	0.041992	-0.14072	-58.978	162.622	830.814	-0.58252	0.37744	-0.097656	7.617	48.854	1372.451	-1.4922	1.0176	-0.10596
1.088	62.2718	24.6485	39.3628	-0.18945	0.31006	0.078613	79.382	122.827	211.3509	-0.080273	-0.017871	0.08252	-142.025	-10.2663	1499.8193	-1.6987	1.2759	-0.071777	-36.7432	168.571	891.305	-0.55371	0.47314	-0.16211	40.8341	-18.392	178.531	-0.060547	0.063184	-0.13496	-45.429	185.7348	779.892	-0.55322	0.34619	-0.088379	20.424	91.4119	1358.944	-1.4648	0.98437	-0.10459
1.09	39.4447	6.0273	12.312	-0.21582	0.34424	0.074219	21.268	175.997	170.4218	-0.083789	-0.024121	0.087598	-89.56016	24.7108	1511.204	-1.6602	1.2109	-0.064453	-34.5626	221.0654	847.5579	-0.52637	0.45215	-0.16602	66.4892	-33.9976	277.8227	-0.1416	0.084473	-0.14355	-115.55	190.9413	737.242	-0.49268	0.30566	-0.071777	18.279	72.9529	1325.719	-1.4394	0.9583	-0.09971
1.092	17.285	-14.0822	24.4058	-0.2373	0.36377	0.07251	71.3485	112.145	177.001	-0.093457	-0.033301	0.10459	-129.237	69.154	1496.0177	-1.6489	1.1802	-0.063965	-22.3904	195.561	817.617	-0.47998	0.41064	-0.16699	53.553	34.926	327.287	-0.2331	0.11387	-0.14873	-112.2373	148.494	718.6563	-0.44629	0.27099	-0.058105	35.026	46.1946	1305.5743	-1.403	0.92979	-0.098535
1.094	21.377	15.6636	22.912	-0.25244	0.37744	0.072266	61.16728	120.649	161.3536	-0.10596	-0.033691	0.1123	-77.306	68.148	1520.492	-1.623	1.1309	-0.054199	25.331	170.245	797.656	-0.44262	0.38867	-0.17505	82.302	-7.333	442.422	-0.33711	0.14414	-0.14902	-107.8194	170.449	679.2536	-0.40381	0.23584	-0.04248	30.725	76.27185	1280.78	-1.3754	0.89805	-0.093555
1.096	-21.703	-15.8752	4.3579	-0.271	0.38916	0.054199	26.169	143.5426	136.12991	-0.12188	-0.033105	0.12617	-33.298	90.47	1509.2446	-1.5942	1.0845	-0.052246	9.443	213.8257	723.7197	-0.40576	0.36182	-0.17285	95.664	41.2693	568.306	-0.46797	0.18398	-0.14512	-159.566	173.711	620.1624	-0.35449	0.19092	-0.026855	16.642	28.937	1262.3814	-1.3413	0.87549	-0.09375
1.098	-17.788	3.9131	16.3152	-0.27734	0.39453	0.035156	41.66	96.8018	145.8964	-0.13223	-0.031348	0.13223	-76.8803	71.227	1455.9347	-1.5815	1.0649	-0.053711	54.1611	168.475	674.8756	-0.36768	0.32666	-0.17188	58.49	54.321	688.349	-0.61602	0.24004	-0.146	-132.96	156.049	590.7473	-0.32861	0.17041	-0.026367	42.196	83.654	1247.491806	-1.31	0.84551	-0.093848
1.1	-16.451	2.022	39.9763	-0.29346	0.4082	0.015137	-16.413	155.471	111.779	-0.14316	-0.024317	0.14238	-3.015	35.6943	1443.658	-1.5483	1.0259	-0.050293	50.0364	192.5016	640.895	-0.35205	0.31104	-0.17383	63.661	7.2099	824.64765	-0.79102	0.30615	-0.12793	-179.595	181.9233	545.022	-0.28516	0.13477	-0.0078125	14.865	135.1697	1201.666	-1.2733	0.82002	-0.088379
1.102	-71.3118	-62.874	61.6381	-0.30444	0.41187	-0.0061035	-45.3412	122.9273	87.2448	-0.14844	-0.017578	0.15049	18.358	60.13	1418.053	-1.5263	0.99023	-0.048828	18.7699	219.1147	591.526	-0.32373	0.26367	-0.16992	36.346919	49.4837	931.9363	-0.99932	0.39522	-0.13223	-178.861	147.952	518.268	-0.25757	0.11499	0.0075686	-19.46	119.313	1195.2704	-1.2495	0.79775	-0.083692
1.104	-57.8114	-27.3639	102.5024	-0.32275	0.41455	-0.03125	-25.078	86.5769	88.3017	-0.15576	-0.0097656	0.15527	1.541	47.376	1399.536	-1.5034	0.96436	-0.049316	57.5357	194.354	584.1112	-0.29956	0.23852	-0.17627	-2.811	-3.256	1021.3446	-1.2351	0.49892	-0.12901	-129.608	150.9784	487.936	-0.23438	0.093262	0.019531	-8.913	181.552	1186.39607	-1.2227	0.77383	-0.087011
1.106	-55.0142	-5.1866	106.545	-0.37207	0.41553	-0.08252	-75.19593	117.467	67.8818	-0.15683	0.0039063	0.15694	66.131	78.9368	1396.259	-1.4761	0.93115	-0.04834	53.4739	256.064	548.0795	-0.2749	0.20654	-0.17334	-45.011	-55.238	1130.907	-1.482	0.61846	-0.12509	-157.61	180.3212	429.632	-0.20508	0.069824	0.033203	-32.686	156.689	1154.08	-1.1914	0.75977	-0.078125
1.108	-100.773	-3.5407	187.848	-0.39941	0.41992	-0.1123	-92.0059	30.137	67.4265	-0.15264	0.0089844	0.16299	53.7965	94.69	1372.6142	-1.4565	0.9165	-0.044434	50.046	222.64	513.528	-0.24756	0.1709	-0.16846	-76.557	-33.735	1178.255	-1.7414	0.75899	-0.11446	-113.92	156.335	432.374	-0.19409	0.053467	0.042725	-23.592	140.0781	1133.963	-1.165	0.7336	-0.079395
1.11	-99.4849	27.2462	309.325	-0.48096	0.43457	-0.17529	-110.138	45.84987	72.6074	-0.1499	0.013672	0.16963	50.1586	49.342	1352.2191	-1.4268	0.88867	-0.047852	74.55	208.273	491.697	-0.2373	0.15283	-0.16895	-95.419	-116.793	1191.674	-1.9976	0.92334	-0.097168	-108.3633	187.649	401.428	-0.18066	0.036133	0.05127	-27.105	178.9855	1101.551	-1.1396	0.71533	-0.078907
1.112	-165.207	-8.8562	377.452	-0.59326	0.45947	-0.22803	-139.89	59.381	51.238	-0.14307	0.018652	0.16963	76.00643	62.9623	1357.6283	-1.3989	0.87695	-0.047607	57.9246	243.962	427.409	-0.21387	0.11816	-0.16992	-147.75	-106.023	1196.786	-2.2306	1.0979	-0.079297	-134.532	187.5333	388.2565	-0.16309	0.020508	0.058105	-66.48584	129.614	1072.967	-1.1145	0.69112	-0.079297
1.114	-134.0076	-2.013	523.234	-0.67139	0.47705	-0.25098	-101.442	-2.922	69.9768	-0.13818	0.029297	0.17822	10.523	83.225	1332.3369	-1.3789	0.86426	-0.04541	78.0783	191.8231	397.353	-0.19897	0.1023	-0.17041	-216.077	-116.757	1196.197	-2.4364	1.2879	-0.071387	-57.007	166.6557	376.335	-0.15771	0.012695	0.063477	-74.0789	165.638	1057.495	-1.0902	0.67344	-0.081152
1.116	-93.274	14.4106	649.184	-0.85938	0.53125	-0.2666	-116.687	62.0287	50.7052	-0.13252	0.029102	0.18525	24.783	95.6516	1316.992	-1.3428	0.85156	-0.034668	42.2216	210.6056	369.669	-0.18945	0.080566	-0.16602	-188.137	-183.997	1201.512	-2.6035	1.4894	-0.076855	-44.984	187.3722	337.1267	-0.15479	-0.0024414	0.07373	-74.9845	196.0165	1006.703	-1.062	0.65088	-0.081543
1.118	-156.0227	-44.2139	809.244	-1.0395	0.59131	-0.28833	-115.725	39.713	34.6503	-0.1248	0.029102	0.19062	5.651	141.607	1275.8955	-1.3257	0.84814	-0.036133	10.71	198.5967	341.5972	-0.18164	0.058105	-0.15576	-185.795	-134.111	1176.086	-2.7034	1.6786	-0.09707	-36.196	136.981	317.605	-0.15283	-0.0058594	0.081298	-79.2941	177.857	984.02	-1.0274	0.62959	-0.07998
1.12	-144.6884	-25.697	952.8879	-1.2324	0.66016	-0.29883	-78.4621	33.9525	39.139	-0.12012	0.028711	0.19531	-36.03	115.534	1239.0501	-1.2949	0.84375	-0.03418	30.274	124.054	348.111	-0.18164	0.047852	-0.14746	-197.019	-160.494	1134.1675	-2.7163	1.8208	-0.12646	34.768	127.0843	301.10732	-0.1582	-0.003418	0.097168	-50.4073	232.388	960.4702	-1.0035	0.60391	-0.080664
1.122	-101.24	-21.571	997.135	-1.4976	0.77588	-0.2915	-112.418	89.971	28.684	-0.10664	0.023731	0.19834	3.084	107.5084	1234.9219	-1.2683	0.83569	-0.026367	-31.1065	181.699	303.8574	-0.1792	0.03125	-0.13965	-163.477	-176.242	1119.6162	-2.6234	1.8636	-0.16914	9.729	160.0408	244.14	-0.15723	-0.0043945	0.1001	-111.701	195.395	951.431	-0.97305	0.58281	-0.081836
1.124	-73.8331	-43.256	1087.899	-1.6318	0.83594	-0.28516	-71.19536	17.6577	45.684	-0.095215	0.015137	0.20068	-32.187	138.5575	1202.5321	-1.2393	0.83008	-0.025391	-44.715	153.4886	274.0331	-0.17872	0.02539	-0.13672	-182.213	-93.5	1129.858	-2.4343	1.8118	-0.22959	43.803	119.0508	232.6967	-0.16553	0.0014648	0.10449	-122.326	184.26	953.056	-0.93848	0.56211	-0.082031
1.126	-3.0588	-19.056	1175.4368	-1.877	0.96484	-0.27637	-66.8573	27.374	53.421	-0.080469	0.003418	0.20118	-49.03832	131.959	1195.792	-1.2046	0.81396	-0.023926	-36.153	138.62	274.656	-0.18408	0.019043	-0.12939	-141.407	-79.747	1130.5481	-2.2042	1.6739	-0.31358	63.578	155.515	212.588	-0.17432	0.016113	0.11523	-94.041	227.393	916.1283	-0.90283	0.54346	-0.083496
1.128	9.416	-89.2	1222.71	-2.0375	1.0635	-0.27222	-41.4775	28.3727	29.0443	-0.062988	-0.0083986	0.19951	-26.462	145.0077	1175.071	-1.1812	0.80908	-0.024902	-69.6788	186.734	237.0567	-0.18408	0.0078125	-0.12305	-153.662	-5.73399999999999	1126.8445	-1.9518	1.5048	-0.39971	40.274	151.834	197.3716	-0.18115	0.029053	0.12232	-79.4136	182.719	908.9389	-0.86455	0.51963	-0.089453
1.13	82.032	-104.484	1256.959	-2.1636	1.1646	-0.27539	0.872	-38.448	43.0457	-0.049317	-0.024414	0.1999	-66.0585	155.166	1131.288	-1.1343	0.7876	-0.029297	-74.5993	112.017	207.6284	-0.18506	0.0078125	-0.11914	-173.168	24.369	1092.0691	-1.666	1.3125	-0.43164	98.5142	117.358	214.9947	-0.18262	0.044922	0.12744	-37.881	212.735	894.565	-0.81768	0.496	-0.087012
1.132	125.701	-77.99	1259.079	-2.248	1.2959	-0.27734	-13.303	18.1778	39.277	-0.029199	-0.04707	0.19424	-60.0197	141.659	1100.0504	-1.096	0.7688	-0.029541	-75.295	121.433	182.664	-0.17969	0.0019531	-0.11426	-134.586	-53.276	1067.6761	-1.4506	1.1349	-0.4252	44.9507	163.164	169.4761	-0.18701	0.064941	0.13428	-49.7819	218.7692	847.6814	-0.77549	0.47725	-0.094824
1.134	99.613	-133.032	1287.787	-2.2515	1.3599	-0.27686	5.33599999999999	4.4647	34.0123	-0.011719	-0.064941	0.18701	-52.0876	197.06	1053.526	-1.0581	0.74854	-0.027344	-78.99	116.974	145.916	-0.16626	-0.0012207	-0.1106	-115.9803	-61.783	1061.073	-1.3177	1.0083	-0.42607	34.062	134.885	151.7224	-0.18213	0.072754	0.13428	-30.605	208.1213	827.094	-0.73047	0.45332	-0.093262
1.136	140.404	-163.286	1327.865	-2.1875	1.4453	-0.27734	49.988	-8.1641	35.921	0.0079103	-0.082617	0.18262	-94.834	187.2235	1031.333	-1.0029	0.72168	-0.024414	-66.874	65.087	160.8769	-0.15381	-0.0029297	-0.10791	-102.3893	-136.82	1087.9	-1.227	0.93486	-0.45811	66.1925	120.202	162.633	-0.17676	0.093262	0.13965	30.9977	261.535	788.3095	-0.68896	0.43213	-0.092773
1.138	169.745	-184.223	1255.76	-2.0847	1.469	-0.27124	48.2232	55.446	10.8263	0.027929	-0.10146	0.17725	-64.6978	162.5481	1037.4232	-0.97607	0.70264	-0.035156	-69.0645	145.3353	147.0386	-0.1333	-0.012695	-0.10352	-48.221	-194.5842	1109.1119	-1.1255	0.8707	-0.49668	2.863	141.102	144.089	-0.17065	0.10547	0.14234	34.7909	231.867	744.3745	-0.64209	0.40576	-0.09707
1.14	210.229	-215.569	1219.43359	-1.959	1.4766	-0.25879	71.9729	-30.5663	34.321	0.045117	-0.1249	0.17881	-120.636	188.842	1013.3243	-0.91943	0.66846	-0.030273	-58.9775	114.9669	124.972	-0.12207	-0.017578	-0.098635	-30.658	-202.586	1094.44	-1.0073	0.80322	-0.51514	33.877	84.2521	136.946	-0.16113	0.11865	0.14307	45.5954	213.621	729.721	-0.60313	0.38144	-0.10185
1.142	233.269	-154.025	1234.223	-1.7773	1.4648	-0.2168	64.4922	-15.9787	44.4275	0.065723	-0.14463	0.1665	-88.777	184.421	1006.3927	-0.88256	0.64331	-0.030029	-32.68	101.655	100.9216	-0.104	-0.021484	-0.099609	0.625999999999999	-279.979	1098.098	-0.87188	0.7293	-0.51816	5.581	110.224	97.005	-0.14453	0.13086	0.14844	64.425	215.745	669.7759	-0.55859	0.35215	-0.10185
1.144	179.708	-124.05	1243.983	-1.7051	1.4531	-0.19336	36.914	0.4001	23.77819	0.085449	-0.16748	0.16113	-21.934	211.1354	1002.72	-0.84131	0.61572	-0.029785	-78.457	143.79	58.371	-0.092773	-0.043457	-0.097656	16.575	-282.389	1143.568	-0.7335	0.66084	-0.51377	-42.079	113.778	82.898206	-0.13965	0.13281	0.14795	34.268	164.263	652.9272	-0.52031	0.32793	-0.10146
1.146	128.277	-89.564	1249.6641	-1.5952	1.4243	-0.15723	80.6165	-42.286	39.74	0.10196	-0.18398	0.16055	-50.555	232.3769	953.7809	-0.78906	0.58545	-0.033203	-46.0675	55.98131	62.1872	-0.085938	-0.049805	-0.095703	25.3	-261.256	1208.096	-0.60537	0.59756	-0.50947	-27.787	64.5407	98.137	-0.12646	0.13184	0.14355	47.18	189.0996	655.4371	-0.47949	0.30664	-0.1084
1.148	116.6	-79.115	1208.7994	-1.5361	1.4014	-0.13793	48.2693	33.9634	23.9676	0.12286	-0.20019	0.1581	19.304	185.587	926.1214	-0.75781	0.56641	-0.033203	-18.313	64.673	73.356	-0.07666	-0.068848	-0.093262	100.215	-272.666	1283.511	-0.49209	0.5372	-0.5208	-89.811	92.423	73.3673	-0.11646	0.12598	0.14941	50.9007	211.287	614.4808	-0.44356	0.2836	-0.11387
1.15	58.631	-148.575	1180.0635	-1.4785	1.3789	-0.12793	27.685	6.173	16.4522	0.14004	-0.2127	0.16045	16.8177	224.548	875.3812	-0.70313	0.53418	-0.033203	-27.3286	54.8394	62.471	-0.070557	-0.076661	-0.08789	90.522	-206.721	1332.499	-0.40186	0.47314	-0.51709	-105.418	36.897	66.6458	-0.10596	0.11865	0.14551	51.435	201.765	597.799	-0.41055	0.2627	-0.11494
1.152	86.09	-154.37	1208.481	-1.3979	1.3579	-0.12158	21.826	-5.1616	11.8592	0.15869	-0.22549	0.16006	10.4327	213.1173	826.244	-0.65918	0.51123	-0.027588	33.573	-17.549	70.6714	-0.070801	-0.089355	-0.083008	66.628	-202.307	1359.378	-0.34258	0.42422	-0.51778	-83.3624	2.747	69.8258	-0.094727	0.10205	0.14258	97.75	249.614	550.712	-0.37539	0.24512	-0.11768
1.154	99.56	-141.815	1211.13	-1.3491	1.3481	-0.11719	-13.463	62.042	-18.8605	0.17139	-0.23438	0.15918	87.977	183.0731	837.83078	-0.62061	0.49121	-0.030273	9.567	52.507	51.9872	-0.075684	-0.099609	-0.069336	92.746	-217.955	1369.339	-0.31953	0.37783	-0.50264	-144.21	43.01	51.016	-0.090332	0.097168	0.14453	36.6537	231.104	498.853	-0.34394	0.22559	-0.12432
1.156	98.958	-191.017	1226.296	-1.2461	1.3281	-0.11084	-14.454	10.5219	5.50785	0.18691	-0.24668	0.15371	47.352	215.74232	799.097	-0.56055	0.45898	-0.035645	34.705	18.4625	45.102	-0.07373	-0.099609	-0.064453	47.295	-187.208	1353.265	-0.3418	0.3419	-0.48467	-104.59	1.47	76.586	-0.082031	0.077637	0.14307	42.043	216.436	486.42308	-0.31934	0.21045	-0.125
1.158	123.47	-190.098	1227.6874	-1.1658	1.3122	-0.089356	-39.264	42.761	18.83877	0.19922	-0.24922	0.14961	62.4302	172.484	777.7975	-0.53027	0.44141	-0.032715	54.112	15.4933	47.454	-0.083008	-0.10498	-0.053711	39.1464	-209.252	1374.304	-0.40673	0.3125	-0.47022	-112.285	40.4101	40.8079	-0.073486	0.064697	0.13965	49.8916	207.4429	462.6233	-0.29102	0.1916	-0.12793
1.16	89.528	-258.518	1183.04	-1.0913	1.2935	-0.065918	-69.6322	44.8877	11.0062	0.21563	-0.25195	0.14531	86.63	190.212	765.2433	-0.47607	0.41064	-0.040527	20.188	65.051	19.1303	-0.086426	-0.10474	-0.042969	64.948	-190.0604	1397.1477	-0.51172	0.30371	-0.45313	-126.434	57.8516	15.2462	-0.05957	0.050781	0.13965	-2.271	144.538	427.318	-0.26553	0.18076	-0.1251
1.162	52.368	-327.915	1225.102	-1.0107	1.2578	-0.06543	-75.8889	-26.179	2.488	0.22305	-0.25234	0.14551	46.683	239.26	701.8527	-0.43579	0.3855	-0.041015	52.0996	-24.585	29.489	-0.088867	-0.098145	-0.034668	30.835	-163.863	1410.071	-0.64951	0.32627	-0.43467	-61.87587	17.65611	34.6173	-0.041504	0.029785	0.13525	14.03	142.096	408.236	-0.24053	0.16553	-0.12705
1.164	28.487	-307.336	1260.271	-0.98438	1.2402	-0.068848	-99.526	28.8957	-6.187	0.22607	-0.24902	0.14746	79.622	210.323	689.247	-0.39502	0.35889	-0.044434	72.9797	-6.2347	38.9017	-0.087891	-0.093262	-0.021484	31.34778	-177.153	1410.139	-0.8082	0.37529	-0.41543	-85.236	54.6334	17.374	-0.029297	0.017578	0.13379	-30.8827	141.806	358.573	-0.22227	0.14737	-0.12558
1.166	-40.748	-324.852	1294.302	-0.93701	1.1899	-0.081543	-107.731	9.388	-2.318	0.2252	-0.24395	0.14639	106.195	246.93	662.9424	-0.34326	0.31885	-0.052246	39.7137	7.6508	14.042	-0.088867	-0.09375	-0.019043	20.3615	-137.513	1414.927	-0.97812	0.45616	-0.38301	-67.3706	12.858	42.1266	-0.00048828	-0.0024414	0.13525	-57.6268	138.9809	349.9251	-0.20068	0.13574	-0.12256
1.168	-71.4524	-303.234	1353.455	-0.91968	1.1487	-0.08667	-101.587	0.146000000000001	12.3375	0.21445	-0.23321	0.1417	50.456	220.017	614.1821	-0.31982	0.2998	-0.057129	45.7811	-38.786	13.838	-0.08252	-0.077637	-0.0068359	-13.7383	-153.801	1440.055	-1.1435	0.55518	-0.35459	-23.291	-5.04286	37.7217	0.018311	-0.021728	0.13062	-40.678	190.482	310.0412	-0.17822	0.12412	-0.12744
1.17	-96.247	-235.8056	1368.202	-0.92334	1.106	-0.094727	-115.768	74.79	-6.7056	0.20234	-0.21328	0.14482	59.18	178.371	602.5363	-0.27686	0.26807	-0.05957	23.389	42.856	-8.346	-0.075928	-0.074463	0.0048828	-7.456	-201.1867	1477.422	-1.3047	0.66602	-0.34375	-51.864	26.9671	9.0826	0.04541	-0.038086	0.12793	-77.736	166.949	272.188	-0.16358	0.1125	-0.12324
1.172	-122.736	-261.4416	1398.241	-0.95508	1.0576	-0.10449	-105.72	22.355	3.9637	0.18701	-0.1918	0.14395	40.3778	225.494	556.988	-0.24316	0.23706	-0.060547	-19.147	16.5039	0.1778	-0.069336	-0.070313	0.0068359	-51.412	-182.2285	1502.5462	-1.4449	0.77032	-0.36016	0.902000000000001	-36.628	37.147	0.073242	-0.066895	0.12646	-70.1387	151.342	258.94286	-0.1456	0.10078	-0.11895
1.174	-103.863	-210.484	1411.50996	-0.98633	1.0391	-0.10645	-105.203	42.95	16.5964	0.17041	-0.16309	0.1499	55.76	174.91	538.2753	-0.21533	0.21191	-0.062988	-12.034	17.3035	15.72143	-0.054199	-0.066406	0.01709	-79.649	-219.435	1525.5979	-1.5698	0.88174	-0.39775	5.174	-3.4625	25.4597	0.085449	-0.079102	0.12793	-73.686	135.1379	236.628	-0.12949	0.091016	-0.11807
1.176	-109.099	-196.936	1374	-1.0483	1.0122	-0.11768	-98.403	49.003	19.6777	0.14219	-0.13105	0.14648	45.31682	179.6113	523.955	-0.17969	0.17822	-0.056152	-28.75	68.393	9.2892	-0.052246	-0.064453	0.021484	-58.3433	-201.802	1558.028	-1.6952	0.98526	-0.45049	7.865	21.1552	-3.4432	0.11475	-0.10352	0.12305	-106.506	74.612	241.4574	-0.11621	0.07959	-0.1167
1.178	-70.7053	-210.224	1420.802	-1.1044	1.0049	-0.12329	-56.039	-18.073	40.823	0.11455	-0.099515	0.14561	-24.7416	206.4305	461.14	-0.16797	0.1582	-0.053711	-36.735	0.1977	20.8945	-0.036133	-0.062988	0.025391	-101.565	-161.293	1579.599	-1.8224	1.089	-0.49062	69.6546	-13.965	10.4096	0.13257	-0.1211	0.12573	-87.142	81.405	233.0514	-0.10274	0.068652	-0.121
1.18	-25.032	-146.613	1443.167	-1.1406	0.99023	-0.1377	-76.387	53.8148	30.5653	0.090723	-0.064746	0.14405	0.332999999999998	153.8159	439.592	-0.14746	0.1333	-0.048828	-47.0865	37.753	26.71	-0.030518	-0.065918	0.031494	-67.024	-178.846	1601.991	-1.9639	1.2012	-0.50684	51.1842	38.543	11.5375	0.14648	-0.13184	0.13135	-77.96	94.416	177.2757	-0.089844	0.053613	-0.12412
1.182	-29.56686	-187.43397	1450.878	-1.1831	0.95557	-0.18311	-40.3651	28.0996	19.6341	0.063574	-0.028711	0.14375	-23.0931	198.415	401.419	-0.13403	0.11499	-0.044434	-69.411	41.5241	22.5602	-0.022949	-0.066895	0.03418	-75.638	-128.0914	1572.674	-2.1442	1.3235	-0.51573	59.3927	-8.841759	29.9593	0.16211	-0.15674	0.13281	-68.7783	84.536	143.437143	-0.075	0.041894	-0.11748
1.184	24.8233	-198.425	1487.1157	-1.2109	0.94531	-0.2207	-4.565	11.0157	33.97009	0.040039	0.0048828	0.14697	-60.735	165.2545	387.6404	-0.12207	0.094238	-0.042969	-65.5068	-26.7389	17.4385	-0.01123	-0.066895	0.041504	-71.298	-131.463	1549.519	-2.3449	1.4574	-0.52149	102.086	-27.3983	45.3287	0.17188	-0.16699	0.13379	-38.096	118.1679	120.9508	-0.064453	0.028613	-0.12285
1.186	26.2644	-159.768	1452.8745	-1.2729	0.92236	-0.29834	-21.465	79.969	14.5	0.01582	0.039453	0.14414	-54.3019	119.2989	373.7485	-0.10791	0.07666	-0.041016	-95.56	44.536	-9.868	-0.0024414	-0.067871	0.041016	-22.4155	-146.2708	1545.3449	-2.5496	1.598	-0.52852	54.7923	6.286	-0.947899999999999	0.18555	-0.18408	0.13672	-83.204	99.1556	92.7	-0.053711	0.01416	-0.12451
1.188	27.783	-209.387	1494.726	-1.3455	0.93384	-0.34131	19.424	28.739	14.8267	-0.0064452	0.069727	0.14121	-94.404	159.96376	321.224	-0.10303	0.069336	-0.042969	-73.5894	10.179	-7.938	0.0029297	-0.066895	0.037109	-47.062	-111.63485	1548.852	-2.7081	1.7251	-0.53701	89.6558	-37.9632	10.3106	0.19043	-0.19385	0.14087	-56.5746	87.76841	110.56881	-0.035938	0.0023438	-0.12431
1.19	43.127	-151.613	1528.793	-1.4604	0.97119	-0.36475	39.597	58.384	31.02	-0.023242	0.1002	0.13926	-73.761	111.222	319.1866	-0.085938	0.053711	-0.044434	-79.8732	-8.1528	20.8076	0.012939	-0.069336	0.038086	-8.81	-144.918	1561.5746	-2.7559	1.8086	-0.52002	63.53087	18.7594	11.4254	0.1958	-0.20264	0.14355	15.293	90.617	96.77	-0.025977	-0.010644	-0.12861
1.192	-6.835	-154.065	1522.3224	-1.6895	1.082	-0.36914	31.456	71.739	37.1606	-0.040918	0.12441	0.13545	-70.704	111.6963	301.032	-0.073975	0.045655	-0.047607	-106.041	58.855	27.01	0.021484	-0.064941	0.037109	47.4891	-123.496	1550.1063	-2.8258	1.7992	-0.57266	18.616	56.5	-2.4757	0.19629	-0.21045	0.14746	-0.823	35.059	95.779	-0.013086	-0.020019	-0.12705
1.194	25.358	-185.518	1547.6802	-1.8315	1.1665	-0.36426	54.0968	4.42333	53.908	-0.058594	0.15283	0.13623	-95.266	153.5219	250.3907	-0.062012	0.036133	-0.05127	-60.6312	-1.2601	37.487	0.032715	-0.07373	0.030762	12.9497	-75.858	1533.892	-2.8905	1.8032	-0.68526	41.826	22.5287	13.1536	0.19531	-0.20898	0.14795	41.12851	38.7345	83.3282632	-0.0055664	-0.03418	-0.12334
1.196	73.118	-156.259	1548.832	-2.1494	1.3906	-0.34424	50.328	51.083	59.408	-0.079981	0.17226	0.13067	-48.6963	90.555	232.924	-0.041016	0.020508	-0.048828	-73.951	34.282	24.3082	0.041016	-0.074707	0.025879	44.5463	-64.028	1539.745	-2.8034	1.8067	-0.71611	-6.793	69.743	-23.8475	0.18555	-0.20361	0.15332	30.0974	46.22	39.007	0.0043945	-0.041504	-0.12354
1.198	71.215	-202.902	1577.0688	-2.3836	1.5842	-0.32056	58.2266	13.0786	56.824	-0.097168	0.19619	0.11875	-33.7231	145.636	185.494	-0.029785	0.017578	-0.05127	-80.901	46.3623	10.743	0.050781	-0.073242	0.017578	66.482	-0.587	1540.296	-2.687	1.7567	-0.6874	-24.188	32.371	12.2797	0.18042	-0.19727	0.14966	9.459	50.319	27.9913	0.0012695	-0.056738	-0.12149
1.2	75.067	-182.782	1596.937	-2.5854	1.7778	-0.28955	78.06776	-10.72	59.757	-0.11241	0.21299	0.11055	-67.336	112.5875	149.408	-0.0068359	0.0043945	-0.054199	-39.579	-18.9751	37.511	0.0625	-0.068115	0.0085447	53.312	31.931	1547.2188	-2.582	1.7227	-0.6748	-27.316	5.5845	24.959	0.17578	-0.18555	0.1499	55.712	77.93	27.8676	0.0041992	-0.061426	-0.11826
1.202	87.323	-98.75	1555.7718	-2.7227	1.9746	-0.22363	28.932	47.342	31.4979	-0.12139	0.23564	0.10108	-10.722	50.962	165.7647	0.0061035	-0.013428	-0.057373	-34.456	56.7126	20.258	0.077637	-0.06543	-0.003418	78.816	16.533	1595.666	-2.4791	1.694	-0.66172	-83.8166	48.93359	-8.721	0.16553	-0.17188	0.14795	36.198	56.121	23.7195	0.0014648	-0.068847	-0.11475
1.204	61.9252	-110.194	1536.4454	-2.5508	2.0664	-0.07666	36.9887	-11.015	53.441	-0.13232	0.25049	0.083008	-20.037	101.9248	133.05	0.018555	-0.023926	-0.055176	-20.004	37.2774	-5.705	0.090332	-0.061035	-0.019531	82.718	26.045	1600.449	-2.3725	1.6547	-0.64717	-52.6299	3.989	10.8365	0.15576	-0.16309	0.14941	49.614	55.8601	39.328	9.7656e-05	-0.074316	-0.11025
1.206	45.408	-63.7099	1552.72536	-2.7495	2.0435	-0.20654	20.969	-16.283	71.2318	-0.14219	0.26387	0.069043	11.054	42.529	136.6305	0.029785	-0.050781	-0.053711	15.484	24.581	14.3083	0.097656	-0.056152	-0.027344	115.34	-35.257	1585.5967	-2.2636	1.5981	-0.62881	-87.2117	33.225	-5.759	0.1377	-0.14014	0.14844	67.2549	55.673	19.484	0.00048828	-0.079102	-0.11475
1.208	52.358	-62.306	1555.083	-2.7691	2.1157	-0.3269	-28.034	-20.0157	80.8358	-0.14531	0.27774	0.05498	52.6924	59.2868	129.6034	0.035156	-0.055664	-0.053223	-4.381	92.812	5.880053	0.1123	-0.053711	-0.044434	123.332	-53.2541	1584.9533	-2.1511	1.5	-0.61621	-118.703	46.9887	5.32435	0.12329	-0.12719	0.14526	22.497	28.0453	14.654	-0.0090821	-0.079199	-0.093164
1.21	26.559	-114.765	1552.871	-2.605	2.1216	-0.30225	-16.421	-83.366	114.108	-0.15274	0.29023	0.044824	5.1683	102.932	80.333	0.036621	-0.078613	-0.051758	21.908	21.5047	17.25602	0.11865	-0.053467	-0.056885	89.647	-26.888	1551.237	-2.0474	1.3931	-0.59521	-72.7552	2.9255	21.0942	0.11035	-0.10596	0.13867	29.795	38.23534	37.54731	-0.017481	-0.07705	-0.082812
1.212	16.254	-55.1385	1524.451	-2.3633	1.9395	-0.18945	-37.669	-44.2708	129.6038	-0.16865	0.30185	0.030274	59.5285	38.7931	86.8876	0.044434	-0.093017	-0.054443	50.4391	53.884	36.2576	0.12598	-0.050781	-0.070313	106.372	-45.546	1553.9295	-1.9554	1.297	-0.58545	-119.621	72.7072	-9.4281	0.088867	-0.081543	0.13232	15.909	36.292	25.36892	-0.024512	-0.073535	-0.073828
1.214	-59.2756	-77.5303	1504.435	-2.2695	1.8574	-0.17041	-64.512	-99.3087	167.3771	-0.19922	0.30859	0.011719	49.9015	99.15	41.3681	0.041992	-0.10889	-0.049316	41.6815	58.356	31.03597	0.12598	-0.047363	-0.092773	92.858	-3.3657	1556.2105	-1.8851	1.2169	-0.57412	-115.526	40.74	19.8318	0.07666	-0.065918	0.12451	-12.152	29.7307	20.3582	-0.036524	-0.073437	-0.061133
1.216	-65.8118	-63.921	1530.474	-2.0879	1.707	-0.18164	-113.1731	-133.2768	208.0353	-0.23457	0.32207	-0.0019531	18.124	73.017	22.614	0.045898	-0.12988	-0.050781	41.3523	-21.7484	58.26	0.12305	-0.043945	-0.10156	46.527	7.2322	1542.627	-1.8331	1.1626	-0.5628	-81.3407	16.216	50.5982	0.057617	-0.041992	0.11865	0.756	47.329	16.3495	-0.044434	-0.072266	-0.054199
1.218	-74.7303	3.323	1505.653	-1.9675	1.6028	-0.19604	-127.6153	-61.656	236.576	-0.28164	0.33086	-0.020996	98.98	11.5549	51.584	0.04834	-0.1377	-0.051758	31.332	33.1219	53.05042	0.12402	-0.038574	-0.11084	65.003	-12.8019	1553.494	-1.797	1.1237	-0.55244	-110.971	50.6984	31.917	0.045898	-0.02124	0.11963	-58.939	32.7155	14.4495	-0.052246	-0.06748	-0.043164
1.22	-119.9072	-39.408	1500.492	-1.8535	1.5107	-0.20508	-97.70129	-84.202	367.14	-0.33633	0.3418	-0.04248	83.201	60.5405	32.676	0.050781	-0.14746	-0.04541	37.358	-2.6469	31.8986	0.11841	-0.030273	-0.12012	34.3332	39.993	1522.4378	-1.7671	1.0894	-0.54102	-42.213	-14.365	42.0409	0.032227	-0.00097656	0.11621	-51.786	39.229	41.763	-0.056933	-0.064453	-0.032129
1.222	-107.3563	-9.069	1519.154	-1.7402	1.3809	-0.2002	-109.7794	-10.6681	507.368	-0.40684	0.35498	-0.069727	53.4465	3.498	36.07	0.050782	-0.15503	-0.039063	31.243	-6.2487	17.2693	0.11279	-0.025391	-0.13037	19.5045	34.8289	1520.213	-1.7428	1.0798	-0.52334	-49.7649	27.815	12.648	0.018066	0.027344	0.11475	-42.661	52.362	35.4529	-0.059668	-0.065625	-0.023145
1.224	-135.739	-28.173	1511.9737	-1.6948	1.3247	-0.20215	-166.411	33.24	633.855	-0.48438	0.38184	-0.091309	51.2892	26.7373	33.042	0.046875	-0.15771	-0.03418	24.11	54.249	9.7202	0.10498	-0.01123	-0.14355	18.6073	62.549	1518.163	-1.7164	1.0672	-0.51923	-47.4218	37.81	15.2915	0.0087891	0.039063	0.11133	-86.6097	39.827	15.8085	-0.060547	-0.064355	-0.015918
1.226	-155.471	-71.313	1544.834	-1.627	1.248	-0.20313	-127.632	-33.3852	745.508	-0.58594	0.41836	-0.10674	30.0731	89.179	7.284	0.033691	-0.1582	-0.02002	9.852	-8.4629	31.4908	0.096191	-0.0073242	-0.14551	-46.844	88.221	1469.053	-1.682	1.0625	-0.50361	5.981	11.8655	44.702	-0.0058594	0.063477	0.10449	-38.0179	33.341	35.41051	-0.05127	-0.064453	-0.012695
1.228	-129.941	-2.936	1517.291	-1.5722	1.2012	-0.21387	-94.1627	-11.1647	837.651	-0.70849	0.45772	-0.11045	31.737	19.8325	33.002	0.025391	-0.15234	-0.010742	-7.111	24.708	38.5475	0.084473	0.0039063	-0.15771	-19.85807	63.6894	1441.043183	-1.6415	1.053	-0.49404	-5.537	80.678	25.8439	-0.019531	0.084961	0.098633	-76.447	19.8692	24.873	-0.042676	-0.076074	-0.0079102
1.23	-120.751	-35.501	1493.12417	-1.521	1.1704	-0.229	-96.945	-57.625	940.126	-0.86787	0.5085	-0.10928	0.122	80.01	13.3106	0.00048828	-0.14893	0.00097656	-8.501	32.7458	34.8832	0.078125	0.012695	-0.1604	-46.3014	103.879	1425.7144	-1.5938	1.041	-0.4873	14.207	47.639	23.2834	-0.035156	0.10156	0.097168	-112.834	0.867000000000001	53.389	-0.031348	-0.081055	-0.010449
1.232	-92.6332	-29.696	1487.9622	-1.4604	1.1382	-0.229	-76.789	-104.838	1060.572	-1.0588	0.57832	-0.10615	-29.6351	53.094	-7.314	-0.018066	-0.14258	0.018066	-35.9383	-30.6706	54.789	0.073242	0.015137	-0.16504	-58.126	130.3867	1420.213	-1.539	1.0244	-0.46797	59.6775	18.0191	47.9707	-0.054688	0.12842	0.085938	-69.60804	29.67348	62.042	-0.018848	-0.087695	-0.008496
1.234	-109.7962	10.194	1458.662	-1.4336	1.123	-0.23438	-88.362	-53.807	1087.645	-1.2729	0.6626	-0.099121	-20.694	-13.457	17.2606	-0.031738	-0.13818	0.023926	-49.086	34.6827	53.6694	0.062988	0.024902	-0.17334	-38.8971	107.8166	1418.194	-1.4847	1.0016	-0.45772	43.609	42.6504	38.0101	-0.0625	0.13965	0.07666	-110.861	30.9854	30.2819	-0.0019532	-0.097169	-0.013672
1.236	-133.916	-38.884	1476.7186	-1.3945	1.1074	-0.23389	-68.40019	-110.528	1077.746	-1.4984	0.75869	-0.088379	-76.12	46.1521	20.2763	-0.054199	-0.12793	0.034668	-57.572	20.8831	40.4561	0.062012	0.029785	-0.17529	-83.013	139.553	1371.5985	-1.4366	0.96845	-0.4378	71.5077	-22.2959	52.686	-0.080078	0.16016	0.062012	-93.6743	33.8991	48.929	0.0073242	-0.10791	-0.015625
1.238	-76.3388	19.5016	1471.909	-1.3792	1.095	-0.23169	-26.54844	-95.054	1040.161	-1.7292	0.86494	-0.07998	-55.4932	-16.055	31.173	-0.063232	-0.12182	0.043213	-53.695	15.5386	17.6326	0.057129	0.040527	-0.17676	-75.266	87.017	1348.1263	-1.3916	0.93887	-0.41953	64.9487	15.1351	67.93	-0.089356	0.18018	0.050293	-59.9122	34.157	33.25936	0.016113	-0.12051	-0.020996
1.24	-83.854	37.4433	1457.652	-1.3691	1.0879	-0.2251	21.05	-95.141	1023.5727	-1.9511	0.97353	-0.069434	-66.237	19.443	27.7788	-0.06543	-0.12158	0.055664	-94.942	77.104	-13.253	0.049805	0.045898	-0.17993	-56.9061	66.415	1332.922	-1.355	0.90869	-0.40332	58.863	-9.1784	54.938	-0.10059	0.19922	0.04248	-94.007	20.1765	13.839	0.022364	-0.13272	-0.023047
1.242	-92.4033	11.688	1458.252	-1.3647	1.0747	-0.21826	78.172	-150.804	1048.2593	-2.1306	1.0956	-0.075195	-86.799	74.1523	-3.618	-0.065918	-0.11377	0.063965	-91.912	-2.8659	15.6708	0.049805	0.051758	-0.1748	-74.891	85.645	1272.003	-1.3276	0.87861	-0.38457	84.6144	-85.7661	91.256	-0.13086	0.2168	0.032227	-39.905	19.859	41.399	0.028613	-0.13818	-0.029297
1.244	-40.955	52.859	1402.6259	-1.3608	1.0669	-0.2124	116.849	-106.545	1050.26338	-2.2573	1.2153	-0.074707	-65.5625	3.0935	16.616	-0.063477	-0.1167	0.069336	-86.689	7.6109	32.7961	0.040527	0.052734	-0.18457	-60.3345	46.56	1268.1579	-1.2945	0.84805	-0.36602	19.49	-17.408	96.2427	-0.14746	0.229	0.023926	0.886000000000003	12.54812	40.42	0.031543	-0.14883	-0.033301
1.246	-51.303	24.9581	1335.25	-1.3452	1.0493	-0.20361	110.048	-145.65	1026.4429	-2.293	1.314	-0.068555	-86.993	60.822	26.664	-0.05127	-0.11475	0.077637	-101.544	11.395	23.8369	0.038086	0.059082	-0.18311	-50.31	96.9023	1248.0419	-1.2617	0.82773	-0.35156	43.9241	-49.0465	113.52	-0.19678	0.24414	-0.003418	-23.273	-8.699	46.36	0.030273	-0.15723	-0.040039
1.248	-19.069	38.7046	1311.83564	-1.321	1.0354	-0.19555	99.35	-180.154	1028.813	-2.2582	1.3883	-0.059668	-92.043	47.65	22.5798	-0.041259	-0.1211	0.077636	-71.83868	-54.005	23.0718	0.024414	0.064453	-0.18799	-38.9537	112.2444	1211.7485	-1.2318	0.80196	-0.33076	33.96	-52.671	158.4518	-0.26025	0.26172	-0.038086	15.107	1.07569	43.564	0.033691	-0.15527	-0.044043
1.25	10.614	83.5868	1303.3401	-1.2905	1.0278	-0.19141	102.258	-94.944	993.322	-2.1645	1.4196	-0.053809	-54.321951	-4.9537	37.159	-0.036621	-0.125	0.075684	-64.3515	19.6737	25.38	0.019287	0.071778	-0.19409	-0.210999999999999	96.8598	1222.4471	-1.2031	0.78418	-0.31885	-47.243	-13.8285	197.052	-0.2998	0.2749	-0.053223	5.913	19.586	3.797	0.03418	-0.15322	-0.051856
1.252	28.601	39.171	1314.466	-1.2549	1.0098	-0.18506	162.411	-61.898	961.983	-2.0208	1.4077	-0.050977	-96.472	52.1447	21.39399	-0.028809	-0.13721	0.078613	-58.9638	-16.9615	39.964	0.0073242	0.083496	-0.18799	-0.134	161.639	1182.4338	-1.179	0.7665	-0.29991	-46.294	-71.343	295.355	-0.39209	0.2998	-0.084961	24.531	28.7622	28.813	0.031836	-0.15361	-0.057324
1.254	79.586	65.1176	1309.278	-1.218	1.0012	-0.18628	154.776	0.630000000000024	950.7035	-1.8535	1.3516	-0.044922	-70.486	-10.138	31.7558	-0.024414	-0.14209	0.079102	-35.132	-50.2751	71.3934	-0.041016	0.10645	-0.18457	1.231	115.7353	1151.5552	-1.1532	0.75664	-0.28174	-49.61	-10.9353	393.33	-0.48047	0.32519	-0.10376	53.239	28.1401	22.2857	0.031543	-0.14961	-0.063867
1.256	65.4105	74.4488	1269.4295	-1.1851	0.99072	-0.18311	71.744	41.05	940.081	-1.6909	1.2638	-0.046094	-41.285	11.8288	38.3951	-0.01709	-0.15137	0.071777	-32.58	1.956	75.346	-0.07373	0.11865	-0.18066	43.365	124.05016	1126.527	-1.1281	0.73945	-0.26143	-66.42	28.848	514.128	-0.5957	0.3623	-0.11768	21.949	14.9016	26.937	0.030273	-0.14746	-0.080566
1.258	46.351	48.917	1265.904	-1.1396	0.96094	-0.17871	17.173	-42.466	974.956	-1.5453	1.1691	-0.043945	-49.6749	62.3012	13.87	-0.014892	-0.1626	0.066894	-11.056	-58.4707	95.343	-0.16406	0.13867	-0.19336	7.90499999999999	161.6495	1057.2724	-1.098	0.72031	-0.2416	-67.644	-11.326	645.805	-0.77881	0.41943	-0.13623	52.04987	-2.6341	34.4476	0.028516	-0.13994	-0.085449
1.26	77.6804	105.762	1228.4449	-1.1221	0.94727	-0.17383	-28.236	-91.58	978.065	-1.4168	1.0813	-0.033008	2.431	5.34736	31.885	-0.0078125	-0.16992	0.064941	24.013	-18.172	184.2535	-0.24365	0.1604	-0.19898	31.676	113.2235	1029.8748	-1.0581	0.69775	-0.22412	-108.552	39.0524	700.325	-0.88818	0.45654	-0.15527	41.1008	-10.6745	13.188	0.031836	-0.13321	-0.095508
1.262	18.448	85.5449	1188.073	-1.0762	0.92383	-0.16992	-36.953	-178.7036	967.892	-1.3271	1.0268	-0.018066	-1.299	58.238	34.1546	-0.0048828	-0.17627	0.0625	7.4165	9.15	283.628	-0.34229	0.18848	-0.20752	34.392	156.178	993.2102	-1.0189	0.66992	-0.20801	-99.803	-18.5878	787.0179	-1.1167	0.55225	-0.17725	10.291	-25.9078	25.9891	0.03457	-0.12344	-0.10801
1.264	-18.124	82.31632	1155.2806	-1.0522	0.90332	-0.16553	7.217	-263.695	987.9188	-1.2573	0.98877	-0.0019531	8.787	35.002	23.3381	0.0024414	-0.18457	0.052734	30.5606	-19.6027	376.394	-0.51611	0.23438	-0.19873	22.591	147.2138	944.924	-0.97422	0.63242	-0.19375	-69.6321	-11.845	882.141	-1.2891	0.63037	-0.1875	39.611	-4.5836	40.752	0.033301	-0.11738	-0.11992
1.266	-21.1642	109.818	1117.995	-1.0254	0.87695	-0.16211	3.614	-237.4606	967.12715	-1.1953	0.98633	0.00625	45.835	-9.4592	37.5765	0.013184	-0.18994	0.045898	82.776	76.438	492.445	-0.62061	0.26416	-0.18994	14.317	122.1895	945.1271	-0.93242	0.59727	-0.17813	-114.02	28.864	936.823	-1.4688	0.71582	-0.1958	-3.424	11.66701	-0.5749	0.030273	-0.10693	-0.13477
1.268	-38.3712	59.8087	1105.3172	-0.9917	0.83936	-0.15381	-8.137	-259.9192	981.3217	-1.1312	0.9918	0.0094727	33.799	40.796	14.2682	0.016358	-0.19483	0.034912	99.941	45.3689	618.085	-0.89111	0.3584	-0.1792	-15.208	186.137	898.855	-0.89785	0.5586	-0.1625	-87.799	-60.728	968.681	-1.6812	0.84424	-0.19971	7.289	15.2571	6.6215	0.028222	-0.092676	-0.14394
1.27	3.044	88.64764	1091.1176	-0.97314	0.81494	-0.15088	-26.6341	-268.0151	1023.591	-1.0532	0.98867	0.013769	57.9374	-34.102	26.088	0.027832	-0.19385	0.027832	87.381	22.3363	778.698	-1.135	0.44971	-0.17944	-19.227	155.5507	886.9033	-0.86035	0.52246	-0.14746	-62.911	-83.1392	949.581	-1.7769	0.90869	-0.19287	3.979	22.7735	1.19	0.024121	-0.082227	-0.15097
1.272	-19.353	110.6171	1061.3186	-0.9292	0.77686	-0.14502	-75.992	-269.424	1062.856	-0.97237	0.98662	0.010547	57.6737	-10.79	43.681	0.036621	-0.19336	0.01123	90.045	63.989	914.985	-1.4058	0.55322	-0.17139	-21.929	168.965	861.6235	-0.82764	0.48643	-0.12764	-59.6096	-100.774	935.1539	-1.9243	1.0415	-0.18164	-57.1045	21.6714	4.4543	0.015137	-0.06582	-0.15684
1.274	-40.6734	105.105	1040.96214	-0.89258	0.74073	-0.1455	-71.503	-334.128	1160.058	-0.89014	0.979	0.0083008	45.556	31.7506	26.81225	0.04248	-0.19727	0.0058594	72.713	-20.423	1033.0912	-1.792	0.7085	-0.14404	-46.329	200.439	813.7262	-0.79589	0.45742	-0.11289	14.818	-147.552	963.3169	-2.0027	1.138	-0.17114	-8.076	16.925	38.756	0.0043945	-0.05293	-0.16397
1.276	-7.194	167.0715	1000.495	-0.85742	0.70898	-0.14355	-81.4958	-291.191	1229.713	-0.81641	0.9668	-0.0041992	43.1972	-24.4446	27.919	0.046875	-0.19629	-0.0029297	28.673	-10.568	1139.724	-2.0778	0.84253	-0.12182	-55.667	143.40846	807.092	-0.76856	0.43008	-0.10195	13.716	-88.0239	971.6761	-2.0298	1.23	-0.16016	-49.7697	19.58978	3.087	-0.0058594	-0.038574	-0.16846
1.278	-41.5667	149.765	951.494	-0.80615	0.6665	-0.1377	-124.564	-252.049	1259.11	-0.74883	0.9416	-0.018945	40.9547	39.546	28.4407	0.051025	-0.19336	-0.011719	15.226	-13.183	1224.22	-2.3379	0.99805	-0.098145	-65.7959	183.986	793.148	-0.73516	0.40547	-0.084765	64.388	-133.396	979.54	-1.9839	1.3052	-0.14941	-85.2333	12.91	14.977	-0.019433	-0.019531	-0.17285
1.28	-51.532	152.136	956.1533	-0.7793	0.64648	-0.1377	-128.752	-208.4895	1288.877	-0.69883	0.9041	-0.042383	24.285	18.7795	23.5773	0.058105	-0.18799	-0.025391	-30.801	-102.6595	1286.631	-2.6074	1.248	-0.075684	-83.6915	173.0626	741.2072	-0.70654	0.38623	-0.071777	97.822	-137.965	971.38	-1.9272	1.3228	-0.14697	-46.584	22.3195	16.732	-0.030371	0.00019524	-0.18076
1.282	-43.4402	186.838	919.8382	-0.73291	0.60107	-0.13037	-171.151	-117.781	1277.602	-0.66211	0.86114	-0.075098	28.058	-15.3081	25.5857	0.060059	-0.17969	-0.034668	-61.053	-77.136	1290.429	-2.707	1.3945	-0.062988	-99.5154	139.9588	726.9266	-0.66963	0.3627	-0.056152	94.726	-84.723	962.68256	-1.7637	1.2969	-0.13721	-102.212	31.29262	-1.997	-0.042871	0.015429	-0.18076
1.284	-67.386	159.8495	875.0057	-0.69531	0.57324	-0.12939	-155.99	-118.346	1282.622	-0.6377	0.82617	-0.10498	11.177	40.452	5.825	0.05957	-0.18018	-0.041504	-112.042	-144.373	1280.156	-2.8452	1.7212	-0.064453	-115.275	204.0867	686.22586	-0.63086	0.33789	-0.041797	148.22	-86.843	989.6447	-1.6272	1.2449	-0.14136	-100.3352	25.3364	33.226	-0.049511	0.037598	-0.18858
1.286	-59.344	182.2314	852.535	-0.65381	0.5415	-0.12744	-91.44	-133.918	1319.4619	-0.629	0.79688	-0.1332	-24.632	-28.223	0.3404	0.062012	-0.17627	-0.048828	-173.867	-201.94	1293.178	-2.8435	1.9192	-0.090332	-117.254	146.039	644.3981	-0.59414	0.31523	-0.03125	154.604	-22.399	985.951	-1.4937	1.1899	-0.13721	-64.431	20.2447	54.00781	-0.061523	0.059082	-0.20605
1.288	-98.945	186.75	815.102	-0.61133	0.50195	-0.12012	-92.703	-140.95	1337.054	-0.6418	0.77891	-0.16181	-18.637	-11.577	25.7599	0.05957	-0.16845	-0.057129	-187.568	-176.441	1274.337	-2.75	2.0195	-0.13574	-103.2564	159.677	610.54	-0.55263	0.2961	-0.02168	121.216	-13.085	981.6487	-1.3706	1.1216	-0.11279	-103.136	-12.0098	46.8348	-0.070899	0.086914	-0.2127
1.29	-90.417	172.7455	815.5789	-0.58838	0.48633	-0.11914	-53.3768	-205.4161	1391.155	-0.68633	0.75547	-0.19189	-52.3668	26.8152	14.927	0.055664	-0.1626	-0.064453	-181.984	-218.902	1204.549	-2.478	1.9634	-0.24854	-137.654	185.5279	541.222	-0.50928	0.27295	-0.0078125	112.442	-73.562	977.742	-1.3374	1.0981	-0.09668	-64.46489	-41.0513	76.1659	-0.07959	0.10693	-0.21904
1.292	-17.357	204.921	794.1053	-0.54248	0.44775	-0.12061	-24.921	-187.6052	1422.87	-0.75469	0.75723	-0.20244	-32.7947	-21.6406	25.34	0.046875	-0.14795	-0.071289	-170.574	-176.068	1127.378	-2.2827	1.8638	-0.2998	-122.957	137.73	535.1504	-0.46074	0.25723	-0.0041015	78.16	-50.556	940.7254	-1.3145	1.0586	-0.060059	-59.0611	-27.397	65.53	-0.098338	0.13116	-0.21826
1.294	-31.8627	185.63	759.3683	-0.50635	0.42652	-0.11866	-29.083	-178.298	1428.364	-0.84521	0.77588	-0.20313	-67.5775	50.3804	4.708	0.040527	-0.14111	-0.076172	-190.198	-111.6303	1070.261	-1.8315	1.5767	-0.38135	-100.6118	201.221	514.2771	-0.41474	0.2333	0.0020508	78.985	-116.264	954.644	-1.3161	1.0452	-0.033691	-76.4204	-34.6984	116.234	-0.12832	0.15088	-0.21777
1.296	31.5048	174.537	755.645	-0.47217	0.39893	-0.11865	24.44	-205.838	1448.397	-0.94863	0.80567	-0.1957	-90.472	38.9837	-10.4796	0.031738	-0.12744	-0.085938	-173.574	-101.608	1101.983	-1.5435	1.3648	-0.40405	-105.568	182.6301	491.076	-0.37178	0.21416	0.012598	120.586	-164.461	975.6525	-1.3149	1.0396	-0.021973	-32.04	-33.4892	195.106	-0.16895	0.17188	-0.22754
1.298	54.557	185.394	725.732	-0.42676	0.3623	-0.11572	13.771	-171.182	1437.445	-1.0508	0.85039	-0.18877	-79.5259	-10.6775	13.568	0.02417	-0.10937	-0.09375	-191.702	-7.37	1127.219	-1.3394	1.1958	-0.41992	-85.6367	164.7231	476.7622	-0.33037	0.19531	0.020215	86.913	-170.093	985.3019	-1.2734	1.0254	-0.021973	-38.5818	-18.5181	241.069	-0.22207	0.19326	-0.23799
1.3	23.3399	162.9733	690.0431	-0.40137	0.34277	-0.11719	9.234	-202.289	1475.094	-1.1566	0.90078	-0.18447	-93.485	56.1997	11.2601	0.016113	-0.09668	-0.10059	-216.269	-9.836	1111.136	-1.1929	1.0308	-0.43506	-63.62	208.496	438.354	-0.29346	0.17725	0.022949	125.495	-242.59335	995.9902	-1.2383	1.0254	-0.021484	-3.155	-0.0169999999999995	364.853	-0.27705	0.2125	-0.25254
1.302	70.3909	179.16105	655.9352	-0.36084	0.31104	-0.11963	37.473	-204.521	1535.115	-1.2747	0.95869	-0.19463	-68.8201	-17.89121	5.6635	0.0043945	-0.075195	-0.11035	-184.655	-76.395	1098.953	-1.1509	0.98096	-0.45166	-65.9131	160.19308	411.975	-0.25528	0.16475	0.03916	127.147	-248.34059	1002.633	-1.1426	1.0059	-0.027832	29.0425	69.172	493.855	-0.34112	0.2461	-0.27402
1.304	51.4634	173.78759	622.9644	-0.32617	0.2832	-0.12232	32.6664	-171.0004	1578.85	-1.3926	1.0156	-0.22314	-75.634	-13.0786	6.3692	-0.00097656	-0.06543	-0.11328	-183.705	-76.637	1073.325	-1.0757	0.90088	-0.49658	-28.839	185.0075	402.2432	-0.22295	0.1501	0.046973	55.148	-258.958	1039.947	-1.0642	0.99048	-0.041504	-25.292	104.682	646.565	-0.4166	0.28779	-0.28242
1.306	43.4426	145.569	614.178	-0.29492	0.25537	-0.12256	68.393	-206.4506	1599.331	-1.5087	1.0796	-0.24502	-78.996	32.39763	-5.7073	-0.0073242	-0.045898	-0.12305	-186.486	-143.248	1076.392	-0.98659	0.83911	-0.51343	-7.902	201.024	349.466	-0.19248	0.14033	0.050879	59.9297	-307.429	1106.819	-0.98193	0.96338	-0.046387	21.041	69.893	775.788	-0.51465	0.34473	-0.28613
1.308	75.234	154.2321	584.1351	-0.25488	0.21924	-0.125	85.771	-187.1706	1586.851	-1.6453	1.157	-0.24961	-52.063	-15.9813	7.9218	-0.01416	-0.035889	-0.13208	-154.892	-162.427	1083.267	-0.88623	0.77197	-0.521	-1.517	123.2444	320.35777	-0.167	0.12715	0.058496	-6.248	-257.012	1154.8424	-0.89648	0.91992	-0.047852	33.382	32.1888	858.204	-0.63565	0.40752	-0.27783
1.31	52.002	169.174	524.5027	-0.23145	0.20459	-0.12256	53.57495	-172.1406	1525.9648	-1.8148	1.2601	-0.23633	-48.429	64.355	15.2782	-0.020996	-0.017578	-0.14014	-126.0878	-186.791	1085.019	-0.74561	0.68799	-0.50049	10.874	157.583	320.5808	-0.14404	0.11377	0.064941	-74.585	-251.597	1197.107	-0.8584	0.89063	-0.052734	17.663	-22.849	980.5512	-0.78555	0.48867	-0.26172
1.312	64.999	174.102	515.414	-0.19824	0.17383	-0.13281	82.03076	-183.7498	1523.4384	-2.0093	1.3891	-0.21982	-52.80649	54.3866	22.2144	-0.046875	0.0078125	-0.15332	-72.8575	-309.717	1108.499	-0.68604	0.64502	-0.49365	21.506	133.721	292.2225	-0.12061	0.10743	0.068945	-84.342	-206.0275	1236.873	-0.7998	0.83398	-0.061035	50.127	-39.705	1121.581	-0.97422	0.58242	-0.23985
1.314	63.778	199.748	483.0563	-0.16919	0.14575	-0.13086	47.88	-110.005	1498.343	-2.2124	1.5396	-0.19482	-6.27800000000001	-21.8577	67.5185	-0.0625	0.018555	-0.14697	-33.2958	-352.513	1155.176	-0.5874	0.55908	-0.48779	38.516	96.74119	296.826	-0.10108	0.10156	0.069531	-149.512	-147.007	1240.4828	-0.77905	0.79175	-0.075684	-26.119	-22.433	1180.491	-1.2012	0.68535	-0.20987
1.316	32.7879	185.03	446.8766	-0.14697	0.12305	-0.13232	29.991	-106.535	1505.4887	-2.3992	1.6974	-0.1707	-5.338	8.9373	71.672	-0.11377	0.054688	-0.15088	-27.1553	-404.906	1202.65	-0.53101	0.50659	-0.47705	38.7955	148.24	266.9401	-0.081934	0.090234	0.071484	-136.714	-162.973	1258.70254	-0.7627	0.74805	-0.099609	-41.316	-29.563	1195.275	-1.4507	0.80518	-0.18457
1.318	61.06	161.9288	409.88	-0.11865	0.095703	-0.13672	30.963	-96.2992	1522.024	-2.4363	1.8441	-0.068164	21.286	-54.00864	89.7111	-0.17016	0.076416	-0.15991	49.851	-414.657	1283.7859	-0.4917	0.46826	-0.46143	15.222	83.7884	249.168	-0.061816	0.086816	0.074023	-72.188	-131.32	1249.067	-0.75586	0.70117	-0.13721	-50.955	-50.059	1167.723	-1.7194	0.92588	-0.15615
1.32	42.4026	143.27257	365.15	-0.10303	0.085449	-0.14258	-38.404	-71.948	1492.396	-2.6738	1.9207	-0.10371	47.4079	-19.243	136.1267	-0.229	0.10107	-0.16895	55.842	-318.388	1322.834	-0.47803	0.44189	-0.42139	38.781	95.4588	245.1458	-0.04834	0.084961	0.076172	-97.094	-128.953	1271.176	-0.7627	0.67285	-0.16309	-147.2621	-104.861	1129.163	-1.989	1.0492	-0.13662
1.322	18.941	127.199	364.4742	-0.080078	0.060547	-0.14404	-51.799	-103.972	1507.201	-2.8906	2.0789	-0.20371	27.8163	34.86356	196.174	-0.33008	0.14502	-0.18066	83.632	-290.2823	1347.67	-0.49658	0.43701	-0.40967	20.357	118.0198	197.778	-0.029394	0.080273	0.074316	-56.107	-169.9251	1336.79	-0.79639	0.64502	-0.17871	-121.664	-159.495	1143.29	-2.2348	1.1676	-0.13115
1.324	44.2566	136.8567	361.2297	-0.066406	0.045655	-0.14869	-77.0225	-70.7897	1511.701	-2.9058	2.186	-0.19238	69.77	-15.3293	309.084	-0.38818	0.17334	-0.18115	96.656	-252.674	1372.059	-0.56787	0.43652	-0.39502	7.655	63.045	184.5838	-0.010938	0.077441	0.082813	-64.992	-138.6549	1351.725	-0.84619	0.64014	-0.18823	-131.943	-158.563	1111.716	-2.4097	1.2883	-0.11611
1.326	-30.9639	154.4111	316.3255	-0.052734	0.033203	-0.15137	-113.5612	-42.137	1506.253	-2.8428	2.1588	-0.12754	64.308	56.635	389.713	-0.5332	0.23828	-0.18506	113.639	-202.208	1376.0566	-0.65234	0.45361	-0.39404	7.845	121.174	157.372	0.003125	0.074707	0.080469	-76.648	-172.657	1391.188	-0.91992	0.65039	-0.1875	-143.81	-162.061	1105.292	-2.5044	1.4204	-0.11182
1.328	-32.3338	145.384	266.2429	-0.038574	0.01709	-0.15527	-88.021	-54.404	1555.058	-2.7293	2.1101	-0.097365	89.712	69.4541	492.298	-0.66382	0.30152	-0.18457	134.33	-237.4355	1406.8097	-0.75098	0.49072	-0.39844	-10.735	89.723	142.6853	0.012305	0.075293	0.073047	8.84	-183.016	1413.6498	-1.0288	0.6958	-0.17725	-103.135	-132.557	1071.974	-2.5059	1.5269	-0.11387
1.33	-52.3295	141.925	238.8665	-0.03418	0.019043	-0.14941	-136.256	-5.776	1538.695	-2.5684	2.0273	-0.083692	110.91	37.1119	642.818	-0.81787	0.37354	-0.18018	112.33	-207.404	1422.5867	-0.91602	0.57324	-0.39355	-33.818	75.021	148.122	0.023926	0.075195	0.075195	-42.056	-163.047	1435.912	-1.0933	0.72949	-0.17432	-169.43	-80.528	997.517	-2.4287	1.5906	-0.13535
1.332	-88.049	113.5287	228.3554	-0.023438	0.0053711	-0.16406	-164.311	-42.686	1535.797	-2.389	1.9208	-0.079981	90.503	96.753	788.452	-1.0581	0.48779	-0.17188	102.242	-191.555	1424.4615	-1.0015	0.63037	-0.38232	-35.465	132.21	124.0151	0.033887	0.072852	0.070605	-28.456	-198.924	1463.447	-1.2437	0.8042	-0.17139	-130.666	-69.5753	980.263	-2.2745	1.5801	-0.17636
1.334	-43.05	82.694	248.4142	-0.018311	-0.00024415	-0.15918	-138.794	-64.8084	1542.8686	-2.2246	1.8066	-0.084961	66.056	31.247	908.3265	-1.1934	0.55273	-0.16113	96.557	-198.224	1428.7707	-1.1875	0.74414	-0.37695	-70.917762	66.3486	114.6367	0.042773	0.069531	0.071191	-14.3915	-177.386	1460.389	-1.3555	0.86475	-0.19654	-115.884	-9.871	971.612	-2.0579	1.4898	-0.23359
1.336	-97.156	84.9596	212.6925	-0.013184	-0.0043945	-0.16309	-161.182	-46.344	1529.89399	-2.0886	1.6958	-0.073731	59.184	-4.199	995.842	-1.498	0.70313	-0.13135	68.926	-137.662	1406.503	-1.3269	0.83228	-0.39502	-71.2001	66.92	94.0355	0.047461	0.071484	0.07041	-9.97055	-174.01	1480.59	-1.4741	0.93311	-0.21777	-177.102	4.979	969.546	-1.8066	1.3379	-0.2959
1.338	-88.272	73.76	188.74843	-0.0087891	-0.011719	-0.16846	-144.366	-80.258	1562.53	-1.9827	1.5993	-0.059864	6.2	10.747	1050.715	-1.7427	0.83447	-0.1145	38.6726	-156.131	1401.129	-1.4668	0.93555	-0.42822	-74.05238	76.4706	57.427	0.054297	0.068164	0.070703	58.725	-195.6737	1521.416	-1.6543	1.0488	-0.23145	-169.201	-15.654	987.314	-1.5637	1.1659	-0.34209
1.34	-34.9027	70.6661	167.184	-0.00097656	-0.013184	-0.16895	-120.1781	-41.176	1555.3627	-1.9062	1.5071	-0.047364	-33.002	-61.159	1141.341	-1.9941	0.97852	-0.085449	35.141	-171.967	1474.354	-1.6504	1.0781	-0.49805	-105.874	14.6	52.63	0.061035	0.070801	0.069824	70.96	-153.605	1536.085	-1.7573	1.1235	-0.23389	-164.145	-29.404	937.467	-1.3652	1.0243	-0.37393
1.342	-69.285	84.448	134.195	0.0048828	-0.019043	-0.17334	-142.634	-23.7301	1513.99	-1.8374	1.4408	-0.053223	-48.542	-23.25	1196.614	-2.3101	1.1958	-0.054199	-16.5949	-147.749	1514.4732	-1.7476	1.1392	-0.52979	-88.2095	64.6466	39.205	0.05918	0.067187	0.070605	110.405	-159.6754	1541.087	-2.0015	1.2974	-0.22998	-154.253	-135.735	927.924	-1.2241	0.92002	-0.39306
1.344	-37.58	66.136	123.088	0.0095214	-0.022217	-0.17407	-109.22588	-55.254	1518.72932	-1.7769	1.3872	-0.061523	-105.315	-43.175	1186.754	-2.4531	1.3125	-0.037109	-55.828	-220.728	1568.646	-1.9526	1.27	-0.55713	-103.322	42.0507	29.792	0.057031	0.067187	0.063281	150.434	-128.699	1513.1247	-2.1919	1.44	-0.21875	-88.613	-218.8336	936.034	-1.1243	0.86592	-0.42256
1.346	-25.844	77.0095	102.86829	0.01123	-0.023926	-0.17041	-121.1197	1.7538	1509.93912	-1.7162	1.3369	-0.066016	-144.915	-122.974	1180.404	-2.7026	1.5415	-0.029297	-62.1365	-217.287	1596.192	-2.1238	1.3801	-0.56031	-101.108	16.404	51.4589	0.055859	0.065235	0.062109	117.477	-84.298	1483.241	-2.3784	1.5981	-0.20605	-90.054	-245.001	938.122	-1.0327	0.84814	-0.45654
1.348	-49.85	75.166	96.998	0.014648	-0.027832	-0.17285	-98.8676	13.9299	1513.919	-1.6589	1.2915	-0.070899	-198.8652	-109.95	1168.733	-2.8061	1.685	-0.060791	-101.249	-230.395	1586.6154	-2.2983	1.5005	-0.56006	-75.8768	69.4995	31.113	0.051953	0.064648	0.064355	132.224	-105.152	1481.7265	-2.5879	1.8105	-0.18408	-66.7318	-286.404	983.443	-0.9375	0.83125	-0.48086
1.35	-6.544	46.011	119.774	0.0097656	-0.031738	-0.16943	-65.335	30.4755	1505.9	-1.6089	1.2478	-0.076758	-195.1204	-180.921	1139.283	-2.8164	1.7656	-0.10742	-93.418	-258.696	1606.251	-2.5151	1.6724	-0.56299	-86.457	19.0713	28.7647	0.04834	0.061035	0.061035	130.756	-83.6291	1494.3615	-2.6738	1.9023	-0.17773	-12.029	-270.82	1023.876	-0.83232	0.82002	-0.48896
1.352	-20.3775	70.3955	82.511	0.0058594	-0.040527	-0.16553	-67.272	85.599	1472.389	-1.577	1.2096	-0.075684	-177.236	-188.098	1117.458	-2.6323	1.7134	-0.18408	-107.12	-177.352	1599.542	-2.5938	1.748	-0.57422	-80.50853	34.3746	40.9777	0.045703	0.052149	0.061426	77.9364	-70.507	1470.246	-2.7715	2.0566	-0.16602	-38.8203	-289.6	1064.173	-0.73037	0.80713	-0.49404
1.354	8.097	60.97	63.843	-0.0036621	-0.043457	-0.16187	-32.541	61.275	1480.0015	-1.5508	1.1758	-0.076172	-194.192	-125.438	1072.1402	-2.4683	1.6392	-0.22998	-116.058	-154.601	1602.514	-2.6812	1.8599	-0.60596	-50.8995	42.7962	20.306	0.045605	0.045606	0.059277	85.514	-88.599	1477.955	-2.7419	2.1116	-0.13354	38.311	-302.825	1138.9067	-0.64121	0.7832	-0.49297
1.356	57.1984	65.821	38.624	-0.0083008	-0.049316	-0.15576	-22.62	81.236	1470.126	-1.5229	1.1478	-0.07666	-152.293	-134.0537	1067.6649	-2.0542	1.4185	-0.30957	-93.892	-131.575	1621.7018	-2.6765	1.883	-0.62549	-40.664	-16.2472	19.92595	0.043262	0.036622	0.056934	35.508	-38.087	1472.639	-2.5737	2.1118	-0.038574	82.742	-265.524	1174.3283	-0.57031	0.74609	-0.49023
1.358	3.17	84.277	10.501	-0.024902	-0.054688	-0.14746	-4.989	71.419	1436.96	-1.4985	1.1207	-0.076074	-154.223	-37.109	1070.2253	-1.7507	1.241	-0.35767	-111.664	-80.5475	1593.123	-2.6309	1.877	-0.63477	-6.614	46.8712	10.7205	0.046777	0.024708	0.05791	-25.742	-42.99	1505.252	-2.7222	2.0688	-0.22168	67.0047	-279.111	1246.321	-0.52871	0.68906	-0.49316
1.36	30.995	50.736	38.4715	-0.02832	-0.055664	-0.14307	12.524	29.3526	1411.24	-1.4687	1.0918	-0.072559	-152.13	-7.387	1057.5288	-1.5015	1.0825	-0.40674	-90.13	-116.759	1588.3295	-2.5039	1.8398	-0.60791	-0.641000000000002	21.4734	-4.1763	0.04834	0.01123	0.060059	-2.463	-23.893	1538.6352	-2.6973	2.0879	-0.26416	100.927	-234.9918	1305.432	-0.50342	0.62949	-0.5002
1.362	55.8644	59.888	28.9063	-0.040527	-0.061523	-0.12988	7.626	74.23	1359.3071	-1.4302	1.0605	-0.072266	-144.525	-33.364	1051.9236	-1.2832	0.92383	-0.46045	-58.646	-78.965	1584.553	-2.5566	1.8223	-0.6875	-3.353	-2.81945	20.3914	0.052246	-0.0034184	0.058106	-59.4487	16.596	1521.471	-2.4648	2.0176	-0.16992	50.0942	-169.198	1303.446	-0.49366	0.5752	-0.50371
1.364	21.9245	60.336	35.498	-0.047852	-0.059082	-0.11938	15.327	45.6724	1337.23	-1.3901	1.0347	-0.066895	-149.618	-23.082	1012.965	-1.2163	0.86572	-0.48389	-36.4674	-40.4504	1559.998	-2.5449	1.873	-0.75488	19.918	62.449	19.5749	0.059766	-0.02002	0.055957	-80.602	-27.768	1532.012	-2.3374	1.8969	-0.10156	61.9685	-157.103	1326	-0.50928	0.52959	-0.51298
1.366	86.737	23.68789	57.559	-0.052246	-0.060059	-0.1084	41.573	35.6909	1340.014	-1.3518	1.0033	-0.069141	-139.045	-101.649	1000.527	-1.1328	0.79199	-0.5332	-12.217	-33.699	1572.458	-2.4492	1.8589	-0.6958	17.899	17.5563	20.8238	0.067579	-0.036036	0.057129	-95.965	-47.0713	1545.8485	-2.2437	1.8032	-0.090332	120.772	-101.417	1311.84	-0.5498	0.48438	-0.52832
1.368	55.6393	44.5036	35.647	-0.05957	-0.06543	-0.091309	26.023	71.4736	1316.004	-1.3128	0.97666	-0.070801	-124.6005	-157.5	1012.119	-1.0657	0.74731	-0.56006	0.9524	34.273	1576.272	-2.3633	1.8145	-0.63232	39.391	38.567	25.5707	0.077442	-0.05547	0.057617	-164.456	-59.159	1543.8959	-2.1113	1.6895	-0.10938	88.1625	-125.032	1336.137	-0.61162	0.47666	-0.53076
1.37	35.869	34.181	22.731	-0.059082	-0.070313	-0.083008	20.422	30.183	1326.468	-1.2788	0.95596	-0.070411	-112.853	-168.005	1020.671	-0.98633	0.69727	-0.56641	32.9384	27.735	1588.998	-2.2383	1.7344	-0.60938	37.302	54.552	15.88945	0.087891	-0.074219	0.058594	-121.868	-80.091	1549.595	-2.0313	1.6348	-0.10938	99.3222	-142.058	1371.732	-0.70264	0.49414	-0.51572
1.372	42.1309	44.1159	3.728	-0.064941	-0.075195	-0.059082	-24.25	56.5665	1306.771	-1.2481	0.93418	-0.073437	-31.76	-254.874	1031.232	-0.86475	0.62939	-0.56396	56.977	0.158000000000001	1634.0207	-2.1558	1.6743	-0.60303	28.046	-3.84068	10.06782	0.10088	-0.087597	0.063476	-123.098	-32.023	1518.4125	-1.8843	1.5122	-0.10449	62.0518	-92.218	1370.434	-0.83662	0.54844	-0.49189
1.374	-27.694	62.975	-7.158	-0.064209	-0.077393	-0.04834	-76.69885	79.15696	1272.2576	-1.2202	0.91455	-0.071777	11.156	-258.094	1044.757	-0.77368	0.57739	-0.56519	60.266	20.7958	1637.8116	-2	1.5215	-0.59619	46.541	46.19	21.7051	0.10908	-0.099118	0.061327	-130.721	-34.348	1501.5404	-1.8022	1.4253	-0.096677	20.6157	-119.765	1397.7146	-0.99512	0.63067	-0.4666
1.376	4.644	23.3928	29.46	-0.068848	-0.082031	-0.035645	-58.43	61.0831	1265.728	-1.192	0.89765	-0.072852	-5.473	-282.16	1068.298	-0.68652	0.52588	-0.56689	76.0445	-33.8877	1659.176	-1.9023	1.4131	-0.58544	21.694	29.9555	9.2673	0.11533	-0.1085	0.064843	-96.453	-8.532	1499.471	-1.7266	1.3516	-0.091797	28.224	-124.398	1445.705	-1.1694	0.7251	-0.43896
1.378	0.940000000000005	17.2096	23.9669	-0.078125	-0.089355	-0.018555	-69.319	133.568	1221.32221	-1.1681	0.87822	-0.073145	51.2257	-307.039	1133.672	-0.5835	0.46143	-0.56787	87.055	-9.5716	1660.064	-1.8315	1.3188	-0.56787	5.123	20.9306	30.358	0.12452	-0.11758	0.067871	-142.395	47.366	1479.245	-1.6362	1.27	-0.10303	-24.223	-139.1608	1467.078	-1.3428	0.81465	-0.4291
1.38	-40.981	27.4795	17.7211	-0.081055	-0.087402	-0.01416	-84.5032	102.8566	1197.9985	-1.1384	0.85478	-0.074317	80.527	-243.803	1184.834	-0.54053	0.43457	-0.56592	88.284	4.74223	1622.2668	-1.7729	1.2261	-0.54932	17.481	78.765	43.8281	0.13135	-0.12598	0.074707	-124.962	44.277	1500.4123	-1.5938	1.2402	-0.1084	-45.022	-173.625	1503.574	-1.5002	0.90723	-0.4291
1.382	-29.888	12.9864	34.5196	-0.083008	-0.098145	0.0014648	-86.4321	82.865	1183.9805	-1.1147	0.82949	-0.070801	97.661	-241.738	1239.8707	-0.4873	0.38965	-0.55859	136.135	-47.76	1636.85	-1.7515	1.1968	-0.53857	-6.736	37.908	33.105	0.13565	-0.1291	0.082133	-115.116	75.337	1519.666	-1.5254	1.1855	-0.12207	-39.744	-125.249	1516.058	-1.635	1.0029	-0.45684
1.384	-71.2782	57.217	31.3407	-0.084717	-0.10401	0.0073243	-117.741	117.4	1138.093	-1.0864	0.80615	-0.066895	122.124	-246.2149	1291.029	-0.47583	0.37915	-0.53589	129.343	-11.1769	1618.369	-1.7319	1.1567	-0.51709	-26.508	50.573	51.005	0.13496	-0.13232	0.085161	-142.978	88.241	1510.966	-1.4688	1.1348	-0.125	-108.618	-126.058	1523.94	-1.7348	1.1047	-0.49336
1.386	-77.1627	50.6659	46.5876	-0.07666	-0.11182	0.011719	-110.63	82.603	1116.77	-1.0666	0.77402	-0.069141	88.833	-205.7003	1304.687	-0.49756	0.37842	-0.50732	101.291	-36.2594	1605.104	-1.7214	1.1394	-0.50122	-26.965	64.828	30.9169	0.13888	-0.12802	0.093763	-92.3036	57.962	1495.569	-1.4487	1.1157	-0.12354	-124.266	-137.732	1582.733	-1.8223	1.2031	-0.53223
1.388	-57.439	45.5738	44.9086	-0.075195	-0.12109	0.015137	-81.4069	136.102	1094.286	-1.0399	0.74532	-0.065234	97.737	-219.324	1318.726	-0.57861	0.40088	-0.48193	92.267	-23.9454	1609.243	-1.7129	1.127	-0.48828	-54.02597	-2.7892	34.8371	0.1421	-0.13105	0.10147	-86.3566	94.026	1434.115	-1.4116	1.0786	-0.11475	-123.894	-116.4798	1580.148	-1.9042	1.2899	-0.55322
1.39	-98.165	55.5489	8.41	-0.069824	-0.13135	0.015625	-86.173	161.67145	1040.738	-1.0156	0.71953	-0.0625	107.516	-150.908	1330.8303	-0.64795	0.42822	-0.47021	56.813	50.06974	1564.9172	-1.6968	1.1187	-0.46143	-43.369	25.2822	35.3359	0.14502	-0.13281	0.10107	-49.343	101.4987	1402.5985	-1.3881	1.0532	-0.10937	-138.989	-153.436	1582.428	-1.9914	1.3656	-0.56367
1.392	-62.4533	4.6109	19.5935	-0.057617	-0.13916	0.012207	-75.1194	120.6624	1036.0858	-0.99843	0.69922	-0.056055	46.4349	-108.296	1345.399	-0.83154	0.51611	-0.43701	43.8057	41.2539	1570.34	-1.6792	1.1196	-0.45068	-80.1287	-1.543	11.117	0.15029	-0.13506	0.10848	15.418	85.3435	1411.559	-1.3706	1.0337	-0.099121	-98.25	-141.047	1564.3823	-2.0887	1.4355	-0.55703
1.394	-72.6278	18.7428	23.609	-0.040039	-0.15234	0.0083008	-92.144	177.456	968.11	-0.98193	0.67725	-0.049805	69.20883	-135.252	1364.3845	-1.0046	0.61645	-0.40845	32.179	97.304	1569.544	-1.6382	1.1099	-0.43701	-111.4529	-14.431	20.505	0.15488	-0.14295	0.11092	14.712	101.7804	1376.8276	-1.3535	1.0059	-0.097656	-105.505	-113.144	1509.236	-2.1944	1.5016	-0.56172
1.396	-110.776	34.6769	17.9226	-0.033691	-0.15576	0.0078125	-111.962	134.02	939.626	-0.95733	0.65557	-0.049024	69.5715	-107.158	1375.258	-1.1855	0.73438	-0.37402	-8.329	113.538	1523.3515	-1.5971	1.0962	-0.43018	-69.6281	42.9117	13.853	0.15759	-0.14765	0.11599	57.0529	57.025	1383.738	-1.3394	0.99658	-0.094727	-107.088	-122.15	1502.918	-2.3003	1.563	-0.5708
1.398	-49.4947	13.7085	43.749	-0.015137	-0.16943	-0.0019531	-93.755	136.668	963.8572	-0.92881	0.64092	-0.046094	36.891	-136.115	1377.419	-1.4336	0.91406	-0.33936	-20.5216	85.858	1500.6375	-1.5566	1.0762	-0.4209	-92.724	20.9009	23.8195	0.15593	-0.1571	0.11874	74.0913	49.5979	1375.004	-1.3125	0.97461	-0.087891	-68.558	-40.521	1504.133	-2.3951	1.6306	-0.58809
1.4	-83.126	46.068	31.89032	-0.0058593	-0.17993	-0.0078125	-78.539	192.6546	935.6677	-0.89756	0.6253	-0.048438	15.404	-161.661	1416.8162	-1.5503	1.0103	-0.33936	-64.6759	138.086	1471.0046	-1.5034	1.0562	-0.40381	-90.739	48.0401	51.9	0.1543	-0.16016	0.12451	52.4864	43.77	1351.3054	-1.2906	0.96045	-0.08667	-62.949	-40.182	1520.242	-2.4722	1.6938	-0.60469
1.402	-56.55766	7.081	54.467	0.0039063	-0.18848	-0.016602	-30.08	155.708	922.3234	-0.86504	0.60625	-0.050196	-18.8304	-131.384	1443.423	-1.7573	1.1997	-0.37988	-107.696	108.03864	1444.3507	-1.4785	1.0449	-0.39648	-87.271	61.783	37.37093	0.14643	-0.16309	0.12356	81.0895	14.368	1345.718	-1.2749	0.94678	-0.085938	-18.5423	-49.573	1556.8179	-2.5172	1.7363	-0.60899
1.404	-11.551	2.7165	59.5942	0.018066	-0.19775	-0.022461	-10.906	204.262	890.6431	-0.82959	0.59033	-0.052246	-37.453	-173.02	1477.91	-1.877	1.3008	-0.43946	-118.208	95.5549	1436.9967	-1.437	1.0181	-0.38525	-84.793	4.9094	48.633	0.1362	-0.15646	0.12609	64.012	74.0431	1302.542	-1.2378	0.93018	-0.087891	30.5288	-13.34	1562.9126	-2.5128	1.7546	-0.6169
1.406	-39.7639	36.753	34.3793	0.019531	-0.2085	-0.030762	-9.445	207.113	846.463	-0.7834	0.56777	-0.051856	-66.7337	-152.866	1506.968	-1.9683	1.3735	-0.49561	-124.799	119.8608	1391.772	-1.4028	1.0005	-0.37256	-53.929	31.72308	51.8897	0.12442	-0.15642	0.1325	22.264	93.24249	1252.52509	-1.2207	0.91992	-0.087891	11.0207	-27.126	1559.979	-2.4668	1.7402	-0.625
1.408	18.583	13.6036	43.956	0.037598	-0.2168	-0.043457	43.7398	163.928	840.756	-0.73838	0.55342	-0.054102	-96.927	-139.265	1510.6334	-2.0698	1.4321	-0.53662	-115.287	56.121	1373.4805	-1.3657	0.9751	-0.35986	-58.1485	-9.78206	27.4074	0.10507	-0.14586	0.13497	57.3204	94.855	1236.6652	-1.1953	0.89844	-0.085938	67.938	6.927	1573.353	-2.3698	1.7067	-0.61904
1.41	7.53	25.6694	30.3266	0.050782	-0.2229	-0.055664	61.329	221.102	778.3815	-0.69502	0.52451	-0.053711	-69.211	-180.963	1541.196	-2.1226	1.4595	-0.54443	-117.744	72.402	1347.94	-1.3237	0.9458	-0.34912	-44.91	-21.2458	29.1096	0.085449	-0.13525	0.13721	10.523	140.04	1213.6864	-1.1724	0.8794	-0.086426	47.825	23.359	1556.8319	-2.2448	1.6423	-0.6124
1.412	-4.41	8.5729	10.5398	0.062012	-0.22656	-0.067871	68.222	154.80266	730.9567	-0.6458	0.50537	-0.052735	-98.289	-138.8526	1575.214	-2.2695	1.5098	-0.54688	-138.252	86.99	1308.942	-1.2988	0.93164	-0.34375	-5.594	24.4555	11.917	0.06592	-0.1206	0.14114	2.376	112.7488	1216.5	-1.1519	0.85596	-0.075684	44.821	-23.114	1574.343	-2.1167	1.5517	-0.61553
1.414	66.0122	-43.136	23.5768	0.082031	-0.23242	-0.088379	77.882	148.961105	709.4519	-0.59717	0.47705	-0.053711	-126.555	-129.9075	1599.175	-2.3875	1.5599	-0.54272	-138.087	64.011	1299.7784	-1.2495	0.90283	-0.32471	-9.617	2.2128	4.039	0.041391	-0.097715	0.14323	15.721	135.6081	1212.192	-1.1211	0.82617	-0.077148	105.629	-26.09	1583.048	-2.0018	1.4557	-0.61582
1.416	31.925	-0.1841	6.623	0.086914	-0.23193	-0.095215	51.9492	184.287	669.278	-0.55254	0.45137	-0.060254	-77.853	-137.2918	1583.578	-2.4937	1.6001	-0.55127	-141.893	133.13	1255.926	-1.207	0.875	-0.30859	0.362000000000002	15.284	40.311	0.019318	-0.077679	0.14007	-8.286	171.6047	1142.5837	-1.1055	0.80273	-0.076172	100.262	-61.715	1569.8221	-1.9209	1.3809	-0.61523
1.418	42.5766	-13.5635	30.58	0.10107	-0.22852	-0.11035	63.41519	141.12286	657.408	-0.50117	0.425	-0.06123	-72.538	-106.0516	1552.815	-2.5952	1.6313	-0.57861	-115.959	101.094	1226.8051	-1.1851	0.86182	-0.30371	16.118	39.35	33.8494	-0.0007513	-0.05187	0.139	-2.942	118.43	1114.09557	-1.0684	0.7627	-0.069336	150.94	-60.612	1573.83851	-1.8625	1.318	-0.61367
1.42	60.0574	0.6668	42.688	0.11011	-0.21997	-0.12427	76.4006	196.53	625.8782	-0.4586	0.39844	-0.062012	-58.288	-146.744	1542.154	-2.6289	1.6426	-0.60547	-93.452	102.571	1216.8914	-1.1323	0.82178	-0.28076	5.848	-6.235	28.991	-0.019531	-0.025391	0.1377	-50.6331	161.4495	1062.938	-1.0334	0.73022	-0.064697	141.192	-10.8966	1567.12697	-1.8288	1.2743	-0.60654
1.422	1.813	46.92	18.9057	0.11426	-0.21191	-0.13086	55.6427	203.897	585.6845	-0.41787	0.3708	-0.059961	-38.415	-121.215	1535.501	-2.6519	1.6782	-0.63232	-75.261	155.5775	1182.529	-1.0957	0.7959	-0.26416	43.042	21.8601	41.8922	-0.037165	0.0039188	0.13068	-65.50499	142.755	1032.247	-1	0.70117	-0.062012	98.845	-30.1348	1560.376	-1.8049	1.2403	-0.59912
1.424	38.934	14.9498	16.1225	0.11523	-0.19922	-0.1416	38.0265	173.118	588.172	-0.37109	0.33984	-0.060547	-38.2141	-82.397	1531.279	-2.6336	1.6946	-0.65259	-50.119	137.2434	1155.2713	-1.0562	0.77002	-0.25244	30.309	-4.38968	17.3865	-0.051939	0.036497	0.12739	-52.089	132.61	1019.619	-0.95459	0.65869	-0.062988	140.196	-16.7029	1548.991	-1.79	1.216	-0.58613
1.426	34.107	26.133	-7.214	0.1084	-0.18848	-0.14893	30.1823	235.53	554.0963	-0.33135	0.30273	-0.061621	21.8103	-74.974	1545.4929	-2.5737	1.6997	-0.66016	-28.437	201.506	1137.01	-1.0093	0.72998	-0.23682	7.121	-22.1863	27.5832	-0.06769	0.07072	0.11953	-73.744	187.8261	980.47	-0.93164	0.63477	-0.064941	123.233	10.04294	1510.114	-1.7759	1.1958	-0.57275
1.428	-6.567	16.49783	6.0067	0.095215	-0.16992	-0.15625	7.224	188.744	509.4731	-0.28799	0.27168	-0.064941	26.319	-12.313	1561.1269	-2.4238	1.6582	-0.64502	-22.35	210.603	1092.258	-0.99365	0.71045	-0.22705	55.9991	29.4071	14.3338	-0.080708	0.10773	0.11127	-95.554	132.1205	977.8693	-0.88232	0.59619	-0.062988	70.438	-8.6697	1507.582	-1.7637	1.1838	-0.56407
1.43	28.823	-15.6162	25.9556	0.085449	-0.15332	-0.15698	15.514	182.641	496.3044	-0.2501	0.24043	-0.069238	56.103	-17.503	1567.878	-2.3379	1.6191	-0.6416	-3.76900000000001	170.109	1064.580067	-0.94287	0.67041	-0.20166	14.462	10.633	-2.6137	-0.095703	0.14453	0.10107	-98.093	153.2978	978.6376	-0.84937	0.5691	-0.063477	95.039	49.607	1517.192	-1.743	1.1762	-0.55625
1.432	-30.426	12.993	16.1149	0.072266	-0.13672	-0.16357	-1.239	190.8973	447.09369	-0.21309	0.20322	-0.066406	106.519	-46.694	1583.24129	-2.168	1.5117	-0.625	31.343	214.361	1011.045	-0.91577	0.64331	-0.18774	25.839	30.7307	27.6779	-0.10614	0.17379	0.092416	-126.086	194.2798	923.6528	-0.81592	0.54248	-0.058105	4.1959	79.969	1498.658	-1.7164	1.159	-0.54024
1.434	-47.320863	-1.081	14.9202	0.052734	-0.10693	-0.16748	-47.8841	115.424	426.5141	-0.17529	0.17334	-0.068848	80.766	2.469	1587.917	-2.0652	1.4172	-0.61694	38.822	167.91	962.747	-0.88525	0.61768	-0.17383	31.704	54.322	21.4617	-0.12024	0.19962	0.083942	-80.288	154.179	912.8693	-0.76758	0.50781	-0.057617	-28.3334	89.402	1473.2599	-1.6839	1.1414	-0.52841
1.436	-17.666	1.4046	16.40077	0.050293	-0.094727	-0.17334	-51.0725	165.0597	389.0294	-0.14209	0.13867	-0.070215	106.088	-28.032	1605.7704	-1.9839	1.3228	-0.6001	37.036	169.635	956.8272	-0.83789	0.58203	-0.15186	-30.713	1.2533	50.1387	-0.13656	0.21834	0.069858	-68.6917	212.394873	870.8874	-0.74561	0.49072	-0.057617	-30.20859	124.032	1437.2773	-1.6523	1.1279	-0.51563
1.438	-67.6276	35.3664	-6.0304	0.03418	-0.072754	-0.17969	-69.696	167.4145	342.974	-0.11621	0.11474	-0.070508	122.967	-31.932	1611.3957	-1.9219	1.2129	-0.58887	17.851	203.961	913.749	-0.81055	0.56543	-0.14307	-11.47	-2.486	60.684	-0.15368	0.24047	0.052032	-49.784	180.004	836.9196	-0.69336	0.4541	-0.062012	-75.021	75.0521	1391.3295	-1.6189	1.1119	-0.50215
1.44	-47.272	4.657	11.7982	0.027344	-0.054444	-0.18481	-85.445	144.0943	346.0741	-0.089259	0.083106	-0.072461	100.489	-16.187	1600.4953	-1.9023	1.1719	-0.57031	7.207	151.3892	893.4739	-0.75	0.5332	-0.11816	-52.1599	-45.8257	56.325	-0.16992	0.26074	0.032715	7.67	150.921	820.55	-0.64868	0.42895	-0.062989	-40.9998	72.3291	1373.2153	-1.5854	1.0956	-0.48467
1.442	-66.1404	36.9343	-3.145	0.023438	-0.037598	-0.18896	-76.1043	186.469	331.0413	-0.070605	0.06084	-0.074121	144.328	-68.963	1610.386	-1.9004	1.1172	-0.54932	25.692	177.8883	876.016	-0.70166	0.50196	-0.11182	-57.166	-66.128	83.065	-0.19475	0.27781	0.016628	4.2404	222.8861	750.092	-0.60596	0.39697	-0.063965	-80.729	97.704	1332.597	-1.5553	1.0804	-0.47061
1.444	-89.308	46.0372	1.542	0.016113	-0.012207	-0.18848	-77.213	122.45035	302.069	-0.056152	0.041016	-0.070801	152.63	-34.9158	1595.18945	-1.908	1.094	-0.53101	0.295000000000002	175.3895	832.91	-0.65137	0.4668	-0.098145	-48.9116	-26.0431	118.392	-0.22612	0.29471	0.002335	52.18	194.993	743.739	-0.54541	0.35889	-0.069824	-105.422	60.332	1333.3129	-1.5261	1.063	-0.45371
1.446	-68.6778	3.388	18.5366	0.016113	-0.0078125	-0.18994	-86.967	103.137	272.408	-0.040332	0.013965	-0.071875	134.209	-48.327	1575.751	-1.9155	1.0786	-0.52051	-15.015	147.4536	841.583	-0.57422	0.42285	-0.083984	-124.499	-54.8755	162.293	-0.26369	0.3128	-0.019522	83.619	212.8852	730.6839	-0.51367	0.33545	-0.071289	-76.659	74.579	1315.424	-1.4937	1.0396	-0.43359
1.448	-102.187	25.5766	9.1915	0.0058594	0.0043945	-0.19385	-104.923	113.9885	240.363	-0.027344	-0.002832	-0.072168	114.905	-64.311	1580.27	-1.9277	1.0801	-0.50879	-34.066	216.903	793.762	-0.5376	0.40088	-0.072754	-134.5049	-37.2349	255.364	-0.31253	0.32559	-0.050759	54.109	227.072	667.0916	-0.4624	0.2915	-0.075195	-136.693	67.795	1266.095	-1.4562	1.0196	-0.42198
1.45	-69.1916	10.5222	12.668	-0.0036621	0.015869	-0.19605	-88.195	57.595	243.1853	-0.015234	-0.018067	-0.072949	58.771	-3.211	1548.9535	-1.9292	1.0894	-0.50488	-57.818	200.630943	756.8438	-0.45801	0.35205	-0.058594	-101.597	31.239	350.388	-0.36914	0.34473	-0.083008	66.1891	171.387	645.3818	-0.41992	0.25683	-0.085205	-94.21	71.269	1255.6694	-1.4176	0.99414	-0.40449
1.452	-40.657	22.0463	20.8727	-0.020996	0.024902	-0.19824	-74.0622	115.3563	228.5224	-0.0091798	-0.035449	-0.072852	52.357	-27.9219	1524.0272	-1.9097	1.104	-0.49707	-64.283	198.2435	729.677	-0.40039	0.32032	-0.04541	-138.0155	45.5242	509.37	-0.44124	0.36862	-0.11848	51.746	234.693	605.513	-0.3877	0.22705	-0.09082	-82.319	130.043	1236.596	-1.3699	0.96602	-0.38808
1.454	-77.476	71.179	1.089	-0.04834	0.037109	-0.21436	-59.698	109.986	168.59	-0.0014648	-0.045898	-0.069824	73.211	5.26819	1523.6658	-1.8804	1.1109	-0.49096	-74.9671	211.4747	675.3246	-0.3457	0.2793	-0.034668	-129.0145	66.75852	662.537	-0.52338	0.4026	-0.15135	76.602	201.797	581.8433	-0.33496	0.18848	-0.098145	-114.826	153.3707	1227.3175	-1.3285	0.94102	-0.37227
1.456	-51.3187	38.2682	45.1759	-0.061035	0.046875	-0.20801	-40.471	69.463	154.80423	0.0066406	-0.055176	-0.072559	23.8826	47.3144	1496.9266	-1.8394	1.1099	-0.48291	-113.4184	139.91	644.0394	-0.2749	0.23438	-0.024902	-130.3749	26.2501	734.468	-0.63387	0.4428	-0.17558	83.037	174.69	587.548	-0.31836	0.16846	-0.093262	-81.4591	176.162	1235.6153	-1.2715	0.90234	-0.35938
1.458	-34.69	33.52	59.666	-0.09375	0.067383	-0.20459	-21.723	103.3178	144.5786	0.016211	-0.064942	-0.071582	16.0324	21.2953	1502.561	-1.7749	1.1001	-0.47119	-116.8073	182.3323	597.9066	-0.24023	0.21289	-0.01416	-123.2955	-50.93	822.604	-0.75833	0.49647	-0.19623	77.861	229.87	532.025	-0.2832	0.14209	-0.098145	-86.0135	197.301	1198.1266	-1.2257	0.86885	-0.3457
1.46	-39.765	4.6914	59.194	-0.13184	0.082764	-0.20654	-24.137	43.38	138.059	0.025976	-0.073145	-0.068067	-35.177	109.754	1464.5682	-1.7417	1.0884	-0.46436	-153.084	182.7235	559.48	-0.17725	0.17041	-0.003418	-80.8288	-48.951	891.6183	-0.90527	0.55469	-0.21973	70.485	171.003	489.541	-0.25879	0.1206	-0.10156	-61.7102	171.318	1171.4	-1.1706	0.83017	-0.3294
1.462	39.012	-33.6843	102.426	-0.17822	0.1001	-0.21045	17.033	57.7132	141.468	0.031836	-0.07959	-0.073438	-56.219	126.107	1429.50578	-1.6777	1.0586	-0.44873	-162.769	164.34519	538.0491	-0.13867	0.14209	0.0063478	-95.462	-67.669	959.951	-1.0702	0.62416	-0.23613	93.185	199.498	480.552	-0.23926	0.10205	-0.099609	12.81	182.24	1165.5341	-1.1222	0.79736	-0.31612
1.464	17.767	23.885	122.641	-0.25146	0.12793	-0.22314	52.8889	88.087	106.869	0.038574	-0.09082	-0.070313	-57.622	103.4775	1426.763	-1.6406	1.0293	-0.4292	-134.916	209.085	491.628	-0.104	0.12158	0.012695	-80.3716	-38.299	1031.033	-1.2447	0.70332	-0.23986	74.466	212.6574	442.707	-0.21875	0.083984	-0.10352	-11.347	188.367	1120.2936	-1.0769	0.76738	-0.3
1.466	22.6325	20.5024	219.68542	-0.29541	0.14453	-0.22705	54.1777	11.814	87.1165	0.048242	-0.097656	-0.072656	-75.475	117.1379	1404.7947	-1.6045	0.99609	-0.41406	-148.147	152.2502	445.872	-0.067383	0.081543	0.026855	-35.2987	-4.538	1011.531	-1.4271	0.79904	-0.23126	47.86	135.048	440.095	-0.20459	0.079102	-0.10596	22.175	175.6901	1100.24	-1.0405	0.73877	-0.28369
1.468	72.703	27.4748	319.032	-0.40039	0.19336	-0.23682	58.9426	41.962	62.037	0.053125	-0.10567	-0.072657	-58.2757	59.611	1370.3627	-1.5645	0.96094	-0.39453	-133.132	160.7684	430.097	-0.056641	0.07373	0.031738	-27.743	-67.1296	999.204	-1.6072	0.8985	-0.22178	29.1529	189.3372	397.199	-0.18652	0.066895	-0.10889	58.598	208.693	1086.428	-1.0102	0.71436	-0.26972
1.47	23.8342	97.46	396.083	-0.50097	0.23071	-0.23804	36.9014	37.8204	33.802	0.059375	-0.1127	-0.076172	-80.839	68.03	1341.427	-1.543	0.94727	-0.38525	-123.041	190.8719	387.372	-0.033203	0.049316	0.044922	33.662	-71.287	1045.769	-1.7827	0.99463	-0.21191	-0.692	152.0491	343.6698	-0.17114	0.062988	-0.10425	22.553	201.406	1038.4169	-0.98574	0.69199	-0.25293
1.472	101.831	53.7572	535.179	-0.62061	0.27051	-0.23975	35.911	25.7276	38.652	0.064941	-0.11719	-0.078711	-90.353	101.294	1317.762	-1.5039	0.92578	-0.36719	-89.257	143.375	391.2985	-0.019043	0.034668	0.053711	61.8178	-91.5063	1063.908	-1.9355	1.0966	-0.21114	-9.833	131.8247	351.934	-0.15576	0.060547	-0.10791	70.2089	172.6481	1030.235	-0.96543	0.66543	-0.2377
1.474	107.485	63.881	667.257	-0.81982	0.34277	-0.22705	76.8739	82.175	36.8821	0.065918	-0.11963	-0.080566	-92.654	65.033	1316.485	-1.4714	0.91089	-0.35547	-89.2859	171.1108	371.777	-0.01123	0.021484	0.05957	97.61	-134.15855	1083.349	-2.048	1.2032	-0.19814	-61.914	182.349	317.0032	-0.13916	0.053711	-0.11328	36.836	180.102	992.677	-0.94668	0.6498	-0.22031
1.476	53.455	74.4881	791.356	-0.94287	0.39014	-0.22412	37.44	29.6729	35.4616	0.065528	-0.12607	-0.079101	-99.117	124.7087	1286.216	-1.439	0.89502	-0.34326	-90.3996	138.2518	337.61	-0.0083008	0.003418	0.072754	119.211	-119.655	1056.965	-2.114	1.2919	-0.19111	-58.7925	124.7221	300.219	-0.13184	0.045898	-0.11572	16.598	156.143	971.359	-0.93164	0.62988	-0.20508
1.478	85.009	21.9886	889.0516	-1.2222	0.49658	-0.20459	32.61	39.4051	39.044	0.061035	-0.13096	-0.073437	-76.4606	134.756	1255.738	-1.3906	0.87891	-0.33203	-38.314	110.883	330.333	-0.0039063	0.0019531	0.076172	89.377	-150.724	1018.172	-2.1094	1.3539	-0.18672	-66.0181	153.032	280.5785	-0.11621	0.037598	-0.11572	46.202	172.1641	963.802	-0.90703	0.61055	-0.19219
1.48	32.598	27.057	946.974	-1.4581	0.594	-0.19214	50.5708	52.872	32.9853	0.053613	-0.13252	-0.064844	-45.79	124.9708	1260.9545	-1.3594	0.86816	-0.32324	15.213	150.1164	290.377	-0.0068359	-0.0039063	0.091309	107.325	-101.521	1024.84	-2.062	1.3833	-0.18896	-73.829	155.182	238.125	-0.1023	0.026855	-0.11963	6.11	206.3339	936.96	-0.88193	0.59131	-0.17744
1.482	4.854	-22.191	1038.278	-1.7007	0.69971	-0.1792	-2.402	0.563899999999999	23.42635	0.039258	-0.13399	-0.061523	-21.938	185.971	1235.9054	-1.3003	0.83252	-0.31006	-1.619	101.4433	272.6443	-0.017334	-0.0012207	0.10034	135.085	-1.10000000000001	989.946	-1.9584	1.3709	-0.18154	-79.246	81.4991	228.10394	-0.088867	0.02002	-0.12646	1.025	187.6436	936.068	-0.84951	0.56748	-0.16104
1.484	-15.236	-37.967	1091.964	-2.0176	0.85352	-0.16064	-8.747	44.1703	17.73367	0.025879	-0.12842	-0.057129	-17.687	145.8231	1227.167	-1.2478	0.80298	-0.30078	26.951	117.4839	245.2692	-0.020996	0.00097656	0.10547	95.153	14.376	989.925	-1.8211	1.3309	-0.15859	-78.126	131.76	197.3445	-0.071777	0.0048828	-0.13428	16.887	200.997	906.946	-0.82275	0.53759	-0.14238
1.486	-71.286	-22.9488	1123.175	-2.1655	0.93896	-0.1543	-25.237	32.766	5.922	0.010742	-0.12363	-0.05039	5.778	180.613	1213.759	-1.2012	0.77441	-0.28857	44.4825	135.294	217.281	-0.033203	0.0029297	0.11426	74.444	-4.11200000000001	1034.093	-1.6961	1.2777	-0.12344	-78.263	100.0613	157.9319	-0.061035	-1.1102e-13	-0.13379	-47.352	204.508	862.344	-0.78613	0.5127	-0.12988
1.488	-72.239	-87.403	1126.185	-2.418	1.1328	-0.1333	-42.789	4.2908	13.7345	-0.0040039	-0.11992	-0.050293	14.466	210.865	1152.4713	-1.146	0.73291	-0.27393	38.337	73.70776	203.4102	-0.039063	0.0053711	0.12061	9.596	-53.629	1018.0482	-1.5972	1.2137	-0.094827	-76.939	75.046	148.7921	-0.038574	-0.013184	-0.13672	-45.88	185.2162	828.069	-0.74805	0.48389	-0.1125
1.49	-142.018	-96.973	1116.741	-2.5557	1.3135	-0.12402	-42.848	46.15	1.19	-0.013379	-0.11406	-0.043262	54.0558	164.9912	1135.4647	-1.1182	0.70996	-0.26855	78.8175	102.628	170.2509	-0.052246	0.010254	0.12305	-26.443	-150.6439	1018.4657	-1.5308	1.1548	-0.067383	-75.39	114.3707	120.3	-0.021728	-0.021241	-0.1438	-71.415	223.053	768.88049	-0.71162	0.45576	-0.10147
1.492	-191.0264	-113.166	1128.725	-2.6426	1.5098	-0.13184	-68.666	1.9719	-1.78	-0.020508	-0.10948	-0.039355	58.8476	218.336	1092.85	-1.0703	0.66406	-0.25439	57.7935	74.437	155.2244	-0.058106	0.018555	0.12452	31.542	-169.30539	1000.334	-1.4806	1.1024	-0.03623	-69.683	37.455	126.8555	-0.0073242	-0.032227	-0.14502	-113.493	186.772	732.4204	-0.67217	0.43506	-0.088184
1.494	-154.102	-164.102	1107.657	-2.6284	1.6958	-0.1582	-82.683	21.0277	19.1112	-0.026855	-0.10645	-0.035645	48.367	192.66	1062.3413	-1.0364	0.63696	-0.24488	52.703	68.1712	151.965	-0.063965	0.023926	0.12598	24.964	-224.1523	986.5234	-1.4344	1.0554	-0.006738	-55.7252	83.886	132.0928	0.012207	-0.043945	-0.15576	-93.0888	164.329	700.2173	-0.63632	0.4084	-0.075293
1.496	-148.771	-112.892	1030.673	-2.5659	1.7329	-0.19092	-75.329	51.124	18.84869	-0.039746	-0.095605	-0.030176	63.1726	175.761	1064.494	-1.0039	0.60938	-0.2334	71.9196	130.209	128.1234	-0.069336	0.032715	0.13428	23.032	-236.3512	1032.605	-1.3765	1.0149	-0.0012695	-26.71696	96.7377	94.7937	0.015137	-0.04834	-0.14844	-133.31	173.092	646.605	-0.59473	0.38623	-0.062012
1.498	-134.4516	-122.007	999.8266	-2.332	1.6641	-0.28125	-108.179	6.938	17.6418	-0.0417	-0.091504	-0.025976	39.5426	216.359	1020.7698	-0.9585	0.5708	-0.2207	37.012	89.5155	110.1014	-0.072754	0.035156	0.13965	39.5436	-207.685	1028.523	-1.2975	0.98242	-0.0030273	-2.777	33.707	107.495	0.025391	-0.060059	-0.15088	-135.113	122.924	631.319	-0.55313	0.36172	-0.052246
1.5	-111.24	-80.141	1003.26245	-2.0769	1.5295	-0.33936	-101.865	54.3266	15.6059	-0.046387	-0.090332	-0.020898	21.808	147.7913	977.8426	-0.93604	0.55615	-0.21338	23.215	99.2744	106.0259	-0.077148	0.044922	0.14111	-15.03329	-260.697	1046.309	-1.2051	0.95117	-0.0014648	15.785	84.549	86.1734	0.033692	-0.070801	-0.14453	-137.889	164.7408	604.027	-0.51094	0.3373	-0.037598
1.502	-158.495	-7.492	1000.396	-1.8164	1.3623	-0.375	-87.392	33.5644	13.705	-0.055567	-0.081543	-0.016699	27.842	151.55508	974.89	-0.88623	0.52197	-0.19775	28.756	98.455	78.8337	-0.079101	0.051758	0.14453	-22.5359	-274.102	1122.46	-1.102	0.92607	-0.00058592	22.3497	36.4356	43.8543	0.033203	-0.075684	-0.14404	-174.447	191.87192	558.183	-0.47149	0.31348	-0.030957
1.504	-110.616	-25.09	1009.3506	-1.5254	1.1328	-0.40869	-93.0094	11.8676	36.8224	-0.059082	-0.07666	-0.017578	18.137	178.78465	926.7656	-0.84595	0.49975	-0.18579	-20.613	53.107	68.4506	-0.080566	0.054688	0.14648	-43.6637	-280.307	1172.42	-1.0085	0.90205	0.0019531	59.0388	17.7073	43.3085	0.040527	-0.080566	-0.13574	-103.4731	169.003	548.0489	-0.42861	0.29424	-0.021387
1.506	-119.655	-30.669	976.386	-1.4194	1.0317	-0.42334	-73.7614	65.542	38.348	-0.061621	-0.070411	-0.012695	-11.157	160.446	920.564	-0.80322	0.479	-0.17334	-10.29	89.6342	56.4619	-0.077637	0.060059	0.146	-96.6101	-310.742	1207.844	-0.92764	0.87666	0.0019531	57.1045	61.227	29.4402	0.039551	-0.084961	-0.13525	-137.137	222.974	491.901	-0.38867	0.27539	-0.021973
1.508	-164.136	-69.846	978.2205	-1.2578	0.88867	-0.42676	-89.666	31.0762	11.4601	-0.064842	-0.067092	-0.0085941	-16.244	227.908	895.584	-0.75195	0.44727	-0.1582	-30.704	63.861	32.695	-0.073242	0.062988	0.14941	-91.7847	-221.547	1214.418	-0.86425	0.84687	-0.003125	68.4634	-13.74882	46.4	0.027832	-0.09082	-0.12305	-115.489	180.99075	471.8598	-0.35342	0.25312	-0.0090821
1.51	-101.2377	-119.256	997.9634	-1.1933	0.83057	-0.43604	-51.7248	58.841	24.3651	-0.069142	-0.061231	-0.0085933	-58.94857	202.3361	865.163	-0.7207	0.42871	-0.15137	-93.139	25.6395	29.96334	-0.066406	0.056641	0.1499	-138.067	-178.968	1194.7661	-0.82031	0.81152	-0.01416	64.1975	16.4328	47.3275	0.020996	-0.088379	-0.11475	-53.797	150.4813	468.628	-0.31943	0.23643	-0.0023438
1.512	-115.3063	-106.876	958.623	-1.1304	0.80127	-0.45166	-32.5513	74.078	31.0798	-0.068068	-0.061035	-0.0050797	-65.639	181.0355	856.722	-0.66211	0.396	-0.13721	-86.877	40.96872	24.9148	-0.060547	0.04956	0.15039	-138.837	-164.126	1241.4852	-0.77871	0.77207	-0.031543	52.3488	36.9806	-0.102	0.0073242	-0.082031	-0.10742	-93.8033	178.305	430.1072	-0.28858	0.21924	0.0042967
1.514	-90.86	-161.497	977.672	-1.0313	0.76367	-0.46582	-39.4533	16.30513	35.0483	-0.066895	-0.061035	-0.0043945	-55.613	219.7292	787.953	-0.60303	0.36182	-0.12207	-100.958	-9.141	20.407	-0.056641	0.041992	0.1499	-105.58	-106.33	1241.243	-0.7415	0.72745	-0.053027	64.563	6.376	-13.1841	-0.011719	-0.079102	-0.089355	-45.4918	126.695	419.5282	-0.26133	0.19912	0.010547
1.516	-7.153	-205.98	1023.604	-0.97461	0.75	-0.46338	22.167	40.187	52.486	-0.063182	-0.062697	-0.0073259	-91.30007	160.376	736.628	-0.57422	0.33984	-0.11328	-92.213	7.144	34.4456	-0.053223	0.030762	0.13867	-106.36	-150.327	1275.709	-0.71143	0.67705	-0.071777	52.9504	74.618	-0.557	-0.019531	-0.074219	-0.087402	-10.647	161.2561	393.0636	-0.23682	0.18408	0.016113
1.518	-34.828	-243.573	1025.284	-0.85107	0.71143	-0.45752	17.893	20.6127	29.80344	-0.060825	-0.067288	-0.010746	-100.8502	191.6353	694.7928	-0.51318	0.30957	-0.098633	-98.823	34.606	22.441	-0.047852	0.031738	0.13721	-44.6842	-134.067	1337.426	-0.69815	0.63408	-0.085937	47.0161	36.642	5.6359	-0.039063	-0.0625	-0.068848	-31.992	167.6054	354.6673	-0.21767	0.17519	0.022852
1.52	5.1543	-319.206	1086.327	-0.7666	0.67383	-0.4585	2.543	6.3692	33.67	-0.049114	-0.070414	-0.015044	-131.51	192.632	641.204	-0.46948	0.28344	-0.087402	-131.317	24.161	13.078	-0.04541	0.020508	0.13525	-41.6564	-105.254	1330.14	-0.70703	0.5957	-0.094727	24.687	10.2779	25.0073	-0.04834	-0.052734	-0.061035	32.485	119.787	347.675769	-0.20127	0.1708	0.030274
1.522	67.5287	-291.186	1149.049	-0.69092	0.63232	-0.46484	37.168	43.098	43.2672	-0.036614	-0.07393	-0.020023	-145.859	134.656	617.157	-0.43066	0.25586	-0.077148	-98.025	62.7658	11.811	-0.036621	0.010254	0.1311	-48.9848	-141.769	1359.081	-0.75274	0.57481	-0.10489	2.901	60.24	7.7804	-0.061035	-0.044434	-0.049316	35.617	174.946	304.1633	-0.1876	0.16416	0.035743
1.524	51.089	-269.496	1199.2499	-0.61523	0.57568	-0.46729	30.36	10.1337	27.4492	-0.024414	-0.075684	-0.027832	-151.541	195.985	572.462	-0.37598	0.22461	-0.063477	-95.032	52.523	0.172000000000001	-0.033203	-0.00097656	0.12939	16.17	-96.4606	1374.3939	-0.82812	0.56963	-0.10029	-19.975	1.3618	11.40011	-0.066895	-0.033691	-0.033691	30.485	146.86	280.8096	-0.17871	0.15673	0.046778
1.526	114.357	-236.0833	1270.803	-0.58936	0.55176	-0.4624	49.391	27.45707	36.7306	-0.0075396	-0.078994	-0.034072	-129.75	170.4746	550.724	-0.34912	0.21191	-0.057617	-81.1829	37.1299	6.83914	-0.021973	-0.013672	0.12549	3.439	-116.6918	1384.927	-0.9293	0.60127	-0.10693	-31.508	33.563	43.81	-0.066651	-0.025879	-0.028564	79.1537	119.41	276.66	-0.17236	0.15186	0.057617
1.528	121.63	-176.058	1260.05	-0.56738	0.5166	-0.44336	66.4114	37.473	31.2758	0.009024	-0.085449	-0.042443	-115.1731	177.7783	535.2345	-0.30859	0.18164	-0.041992	-68.0318	59.4952	16.0324	-0.015137	-0.022461	0.12207	25.599	-150.134	1444.584	-1.0482	0.65098	-0.1	-53.224	58.643	5.6928	-0.064453	-0.019043	-0.022461	47.486	144.272	245.2366	-0.16758	0.14629	0.065624
1.53	79.942	-189.9546	1296.9346	-0.58618	0.50391	-0.42456	28.749	-22.9641	47.08	0.030465	-0.090486	-0.053377	-125.167	241.32	496	-0.28149	0.16455	-0.032471	-87.7854	8.4581	17.6965	0.0039063	-0.039063	0.11865	38.2055	-110.6784	1467.914	-1.1572	0.70508	-0.10156	-60.0656	21.3722	2.8246	-0.058105	-0.019531	-0.016602	55.1942	94.915	243.9441	-0.1667	0.14483	0.074999
1.532	114.322	-166.3204	1330.6352	-0.62988	0.50098	-0.41406	19.207	22.59221	62.272	0.045233	-0.099468	-0.063439	-99.3556	198.283	457.699	-0.25488	0.14648	-0.021484	-27.249	34.9125	44.8719	0.020019	-0.053955	0.11646	10.475	-150.3627	1500.532	-1.2535	0.74961	-0.12129	-61.0558	71.1092	-10.501	-0.055176	-0.019531	-0.014648	66.119	145.445	226.0566	-0.16474	0.14209	0.081247
1.534	61.0144	-147.597	1348.429	-0.73975	0.51025	-0.41064	9.576	16.377	48.956	0.068359	-0.11279	-0.071777	-84.8043	216.033	423.021	-0.23193	0.12402	-0.012207	3.088	55.108	36.6208	0.037598	-0.068848	0.11572	48.5459	-128.1181	1538.939	-1.3566	0.79541	-0.15303	-74.541	16.067	-5.854	-0.046875	-0.025391	-0.0092773	45.776	168.105	188.933	-0.1626	0.13252	0.094529
1.536	65.385	-143.709	1409.5294	-0.84522	0.54395	-0.39404	-0.329999999999998	5.10987	34.051	0.081423	-0.11713	-0.083507	-41.7119	186.6892	402.3871	-0.21777	0.11621	-0.0048828	-20.476	20.5518	33.426	0.057129	-0.088379	0.10938	50.83243	-103.099	1519.466	-1.4519	0.84541	-0.19405	-86.743	-15.8895	32.2887	-0.037597	-0.026368	-0.008545	57.1472	114.114	196.118	-0.15674	0.13037	0.10547
1.538	64.5489	-99.007	1419.058	-0.97021	0.59521	-0.37598	23.594	33.046	26.4054	0.095343	-0.12638	-0.098762	-24.395	111.515	397.0998	-0.2002	0.099121	0.01416	45.4485	50.206	33.2058	0.069336	-0.098633	0.10938	47.883	-133.8688	1527.712	-1.5576	0.90586	-0.23545	-81.102	42.8557	22.7644	-0.031738	-0.038086	-0.0043945	2.328	171.011	149.3554	-0.15019	0.12646	0.11182
1.54	45.754	-90.122	1416.384	-1.165	0.69922	-0.34033	-21.776	-5.4049	22.6103	0.11053	-0.13315	-0.10791	10.282	159.57	374.7068	-0.18261	0.0896	0.020508	40.096	36.828	18.352	0.093262	-0.11182	0.10498	62.1977	-97.244	1528.507	-1.6909	0.97705	-0.25781	-96.022	0.667000000000002	23.2915	-0.025391	-0.052734	-0.0058594	-12.343	134.021	137.368	-0.13495	0.12138	0.12061
1.542	51.0431	-100.096	1447.899	-1.2627	0.75684	-0.32813	-24.609	5.6823	21.4765	0.1163	-0.14088	-0.12061	20.184	144.043	330.86	-0.17139	0.07959	0.031738	35.46	16.3855	28.8757	0.11304	-0.12818	0.10156	36.725	-104.2419	1497.7613	-1.8647	1.074	-0.28184	-86.8987	43.7535	37.95	-0.025391	-0.056152	-0.0029297	7.779	103.2068	137.92955	-0.11854	0.1163	0.12257
1.544	-13.272	-77.675	1460.761	-1.4468	0.8833	-0.33203	-33.739	21.6901	6.745	0.11768	-0.14404	-0.12744	15.391	154.9308	318.9911	-0.15723	0.076172	0.046875	66.01089	27.2598	46.694	0.1333	-0.14111	0.10059	30.801	-104.543	1500.5148	-2.0571	1.1889	-0.29239	-85.996	60.771	32.06041	-0.02002	-0.07373	-0.0039063	-45.227	130.7575	106.761	-0.10193	0.10566	0.12363
1.546	-48.1506	-110.0399	1521.387	-1.5699	0.98926	-0.35303	-77.946	-15.7684	29.0353	0.11721	-0.14347	-0.143	42.5033	191.971	284.6681	-0.14795	0.068359	0.054199	46.032	-13.12884	47.328	0.15771	-0.15625	0.1001	38.144	-39.1821	1506.0959	-2.2668	1.3346	-0.30175	-95.637	15.0367	33.2698	-0.017823	-0.088379	-0.0065918	-55.0587	57.07	115.6195	-0.083496	0.097168	0.12549
1.548	-15.507	-101.2272	1560.475	-1.687	1.0728	-0.38623	-63.6787	11.538	46.456	0.11173	-0.14678	-0.15165	25.853	120.0693	266.024	-0.13477	0.066406	0.066406	75.48778	-5.016	60.405	0.1709	-0.1626	0.097168	7.663	-54.164	1495.4525	-2.4734	1.4915	-0.29971	-54.5351	76.941	24.1249	-0.016113	-0.098145	-0.003418	-79.2642	79.7008	92.46568	-0.060965	0.087123	0.12656
1.55	-95.435	-104.07	1565.2873	-1.8281	1.1563	-0.43457	-93.877	1.864	14.8987	0.10063	-0.14204	-0.16016	51.3906	146.894	237.1518	-0.12207	0.065429	0.071778	85.927	9.11249	40.7206	0.20117	-0.18115	0.098145	-26.105	-21.3961	1497.8882	-2.5684	1.6406	-0.2373	-43.21444	37.1591	25.5852	-0.010254	-0.11084	-0.0014648	-121.266	99.1562	69.3775	-0.044998	0.072861	0.12853
1.552	-93.068	-133.943	1610.192	-1.9014	1.1934	-0.45215	-93.309	-7.818	24.8874	0.083731	-0.1311	-0.16632	71.301	142.056	192.294	-0.10791	0.058594	0.075684	31.8248	-0.528	34.6383	0.22583	-0.18774	0.096435	-39.442	27.934	1479.69	-2.6226	1.7251	-0.17207	-19.484	14.412	35.5495	-0.0048828	-0.1167	-0.0048828	-91.2306	51.7271	84.595	-0.019642	0.061603	0.13005
1.554	-56.7626	-119.255	1613.6454	-2.0801	1.2676	-0.44824	-81.168	35.5983	11.007	0.0625	-0.10986	-0.17627	47.6194	93.7996	213.6371	-0.088379	0.061035	0.084961	48.1344	46.086	45.57	0.24219	-0.19727	0.097168	-83.623	-4.143	1507.634	-2.91	1.8431	-0.30732	-4.032	48.733	16.817	0.0043945	-0.12451	-0.0097656	-130.751	105.752	55.2065	-0.0037757	0.052849	0.13213
1.556	-111.811	-111.095	1628.479	-2.2563	1.3403	-0.44532	-117.48	3.9589	11.80422	0.040768	-0.082371	-0.1882	41.02	156.466	190.91349	-0.079102	0.05957	0.091309	13.084	45.77	29.9264	0.26465	-0.2085	0.09375	-68.134	36.283	1538.9086	-2.9425	2.0122	-0.34287	13.059	-6.7616	7.5134	0.012695	-0.13355	-0.014404	-117.879	71.3248	46.6061	0.01709	0.040527	0.13574
1.558	-92.383	-111.2247	1651.703	-2.4546	1.4302	-0.44287	-96.6154	1.001	42.984	0.017678	-0.053451	-0.19244	38.51	133.88709	155.6001	-0.0625	0.057129	0.099121	-19.623	23.5602	34.4458	0.27344	-0.21094	0.094483	-103.714	19.679	1550.5435	-2.8679	2.0599	-0.29502	43.883	22.106	23.2016	0.024902	-0.13428	-0.018066	-89.4396	42.98267	56.69	0.024926	0.028273	0.13976
1.56	-86.348	-80.83	1644.331	-2.7202	1.5708	-0.44775	-58.7473	10.5592	12.554	-0.0082215	-0.019639	-0.20025	38.07	146.1031	140.528	-0.047119	0.05542	0.10474	10.492	44.106	23.8422	0.2793	-0.21729	0.096191	-136.419	-25.163	1569.935	-2.7612	2.0435	-0.24414	46.6414	39.028	18.19365	0.040527	-0.14014	-0.026855	-134.632	85.1243	31.137	0.034976	0.015197	0.13936
1.562	-87.968	-107.8159	1627.851	-2.8354	1.6431	-0.46533	-71.9162	-18.27749	-14.9115	-0.029223	0.016045	-0.20053	37.497	191.515	118.1349	-0.029297	0.052246	0.10596	-48.1647	-3.074	13.6876	0.27881	-0.21582	0.095703	-143.191	-1.9376	1554.329	-2.6123	1.9865	-0.22246	42.2299	-6.0492	57.292	0.045898	-0.14307	-0.030273	-98.012	4.248	54.3311	0.042368	0.0076349	0.14395
1.564	-21.5994	-87.4446	1636.86634	-2.9976	1.7954	-0.50146	-25.225	11.3567	5.098	-0.045898	0.050293	-0.21289	-4.434	135.51	118.8819	-0.0063477	0.045898	0.10889	-71.3797	-9.57132	33.1858	0.27539	-0.21143	0.098633	-181.079	-51.5825	1530.225	-2.4378	1.9036	-0.21612	44.25269	45.549	58.446	0.059082	-0.15137	-0.039063	-74.1826	29.4129	55.7045	0.046842	-0.0020452	0.14866
1.566	-53.605	-53.595	1594.311	-2.9885	1.8742	-0.49463	-26.199	26.708	-10.599	-0.063683	0.070876	-0.21843	-12.314	153.228	116.832	0.0014648	0.045898	0.10938	-76.756	7.8753	22.151	0.25977	-0.20313	0.09668	-138.682	-40.602	1536.8581	-2.2593	1.8087	-0.21572	63.6419	5.81338	30.9595	0.066895	-0.15405	-0.045899	-77.574	52.6985	41.567	0.046387	-0.011719	0.15674
1.568	-3.1766	-66.442	1607.912	-2.7964	1.895	-0.39795	-65.0276	27.04168	3.58065	-0.077742	0.09094	-0.22078	-52.088	132.236	91.2202	0.021973	0.038086	0.11182	-97.025	-13.457	1.712	0.24195	-0.18652	0.10254	-101.7543	-13.371	1522.7055	-2.0968	1.6982	-0.20996	45.6428	-23.8346	42.837	0.07373	-0.15527	-0.054199	-22.72	0.1472	52.335	0.053201	-0.016941	0.15867
1.57	45.308	-18.6477	1594.747	-2.9448	1.9126	-0.67334	7.95	56.452	38.5648	-0.089086	0.10429	-0.22344	-77.216	59.622	75.7114	0.037598	0.032959	0.1167	-81.689	19.287	14.41164	0.22119	-0.16895	0.098633	-116.9744	-59.1161	1530.787	-1.9644	1.5806	-0.19189	47.956	23.23947	20.8134	0.074219	-0.16162	-0.060547	-23.69	66.788	31.92905	0.049931	-0.021185	0.16547
1.572	12.9415	0.3938	1584.651	-2.8628	1.9673	-0.74561	1.273	-4.044	42.3251	-0.10736	0.12101	-0.22659	-76.8536	59.12	70.522	0.054199	0.026367	0.12256	-102.319	9.6079	0.818999999999999	0.17871	-0.13281	0.10645	-87.7107	-21.9236	1537.197	-1.8603	1.4643	-0.17451	34.789	-34.143	18.5354	0.077637	-0.16602	-0.074219	-18.522	14.9938	36.434	0.053902	-0.024888	0.16955
1.574	83.895	-1.009	1633.79373	-2.519	1.9282	-0.67822	5.67	-31.8171	87.4838	-0.12793	0.13818	-0.22852	-93.021	13.13	59.885	0.066895	0.015625	0.12891	-131.587	2.72	18.35	0.15723	-0.11768	0.10986	-115.524	-25.0734	1518.4058	-1.7781	1.3664	-0.17119	23.561	-1.613	31.6748	0.077637	-0.16211	-0.082031	18.144	-16.7795	48.5328	0.061176	-0.035447	0.17286
1.576	104.737	13.486	1625.1571	-2.2976	1.7961	-0.61181	44.7302	-9.665	99.162	-0.14994	0.15985	-0.22455	-111.902	33.645	48.432	0.073242	0.0087891	0.13184	-66.8741	29.5826	20.5601	0.11182	-0.078125	0.10889	-98.894	-33.358	1521.321	-1.7078	1.2977	-0.19072	-12.246	22.263	12.8124	0.075439	-0.16211	-0.088623	24.667	27.44015	23.8019	0.065918	-0.04248	0.16797
1.578	90.394	-16.931	1658.216	-2.127	1.6523	-0.5918	33.692	-6.2	115.268	-0.19006	0.18215	-0.22174	-72.8859	85.0038	41.86	0.079102	-0.0014648	0.13818	-102.172	8.8626	14.05495	0.075683	-0.045166	0.11279	-59.891	48.835	1488.30083	-1.6357	1.2457	-0.20254	-1.303	-23.0208	14.2707	0.069824	-0.15625	-0.099121	54.5101	-49.976	28.0324	0.07451	-0.052049	0.17533
1.58	126.754	5.573	1675.205	-1.937	1.4829	-0.58008	69.663	37.375	201.957	-0.24631	0.20551	-0.2163	-117.65	38.16322	38.8465	0.088135	-0.016113	0.14258	-85.32	9.91	35.272	0.039551	-0.013184	0.11523	-93.669	56.084	1455.518	-1.5757	1.1997	-0.21045	6.283	26.137	38.769	0.062012	-0.14941	-0.1084	61.27639	-8.6405	32.1231	0.08162	-0.067126	0.1765
1.582	102.136	16.477	1636.0426	-1.855	1.4087	-0.57764	45.383	42.502	269.692	-0.30717	0.22521	-0.22184	-95.914	51.4759	47.249	0.093262	-0.030273	0.14258	-56.7392	0.6255	23.931	-0.0019531	0.027832	0.11377	-60.814	100.093	1457.01129	-1.5183	1.1554	-0.2124	-36.069	17.2193	17.65809	0.061035	-0.14453	-0.11182	41.2068	7.5847	21.5665	0.094186	-0.076479	0.17817
1.584	141.935	-3.2299	1632.4323	-1.7544	1.2778	-0.56494	28.1868	32.5218	375.792	-0.38672	0.26074	-0.22461	-78.553	38.0885	29.6874	0.096191	-0.047852	0.14648	-88.244	-23.4088	16.5214	-0.021484	0.050781	0.11328	-44.942	138.666	1435.9455	-1.4742	1.1199	-0.21914	-58.3356	9.733	15.5952	0.053711	-0.13184	-0.12451	70.9945	-24.7465	44.683	0.10356	-0.093794	0.18037
1.586	169.13	9.8431	1626.068	-1.7168	1.1973	-0.53956	86.193	81.732	509.929	-0.48217	0.293	-0.2237	-72.6638	-0.225000000000001	35.5839	0.1001	-0.04834	0.146	-16.152	13.0551	5.7894	-0.048828	0.084961	0.1084	-59.93	78.734	1425.283	-1.4399	1.0855	-0.22422	-49.2978	51.6772	4.995	0.049805	-0.12329	-0.12842	53.6543	56.028	21.906	0.11621	-0.10254	0.18994
1.588	121.104	-7.823	1615.3392	-1.6992	1.1367	-0.51172	66.478	73.351	628.095	-0.60087	0.34513	-0.22138	-45.5597	41.6491	38.4509	0.10449	-0.072266	0.15186	-16.524	30.499	0.643899999999999	-0.06543	0.11572	0.10913	-1.432	90.499	1398.571	-1.4113	1.0552	-0.22871	-87.571	-14.336	-3.2469	0.046875	-0.11084	-0.13281	51.9443	24.7445	24.7742	0.12701	-0.11737	0.18915
1.59	155.499	-36.8917	1632.796	-1.6973	1.0918	-0.49414	45.5128	82.804	791.88156	-0.75631	0.40608	-0.20803	-44.7455	9.74	40.9275	0.11426	-0.085694	0.14698	-30.129	31.4969	7.1424	-0.077637	0.13916	0.10352	-1.949	76.8814	1358.94266	-1.3906	1.0254	-0.22559	-92.046	0.698	32.789	0.039551	-0.091797	-0.13965	48.7476	-0.273	39.2427	0.13409	-0.12992	0.19456
1.592	101.063	-3.7161	1591.715	-1.6997	1.0825	-0.48584	14.384	77.113	896.74	-0.95096	0.48236	-0.19159	-46.6977	11.0255	41.0484	0.12305	-0.10303	0.14307	35.878	58.774	4.74814	-0.094727	0.17041	0.093262	13.845	48.588	1344.7839	-1.3742	0.99806	-0.21885	-76.304	18.4582	-7.3367	0.033691	-0.080566	-0.13965	-12.399	46.167	17.03	0.14444	-0.14316	0.19459
1.594	70.548	9.496	1584.932	-1.6934	1.0723	-0.47754	-47.6907	13.89	983.9998	-1.1851	0.57275	-0.17822	-4.714	54.608	20.6112	0.1416	-0.12744	0.13916	20.182	37.968	-1.119	-0.10254	0.18799	0.094238	35.859	94.6123	1311.961	-1.3589	0.97393	-0.21435	-103.478	-21.4034	2.34679	0.021484	-0.056641	-0.146	31.741	-16.9977	19.306	0.15086	-0.15718	0.20117
1.596	102.4	48.68728	1584.808	-1.6804	1.0716	-0.46948	-36.726	-5.71	1084.987	-1.4533	0.68573	-0.16329	-0.0689999999999991	10.7262	10.5233	0.1499	-0.14014	0.1377	49.36	32.2658	21.6444	-0.12109	0.20801	0.086426	-4.10799999999999	52.208	1294.725	-1.3433	0.94893	-0.20655	-97.619	39.3384	8.1091	0.0090334	-0.034424	-0.14868	5.174	11.0562	2.769	0.16162	-0.16699	0.20068
1.598	56.921	95.192	1545.8036	-1.6641	1.0703	-0.46387	-78.529	-33.208	1126.385	-1.7466	0.82016	-0.14961	31.972	32.759	13.9167	0.16846	-0.16162	0.13525	57.5731	34.164	27.0923	-0.13379	0.22241	0.08667	16.231	63.791	1302.881	-1.3257	0.92705	-0.19111	-85.775	16.37935	-0.9508	-0.0014648	-0.017578	-0.15234	-53.87306	17.9544	-8.71353	0.16731	-0.17789	0.20369
1.6	23.773	97.5207	1534.2022	-1.6289	1.0723	-0.44824	-145.27	-64.5859	1194.141	-2.0466	0.97485	-0.14687	41.9109	21.3192	23.9999	0.17944	-0.17651	0.1289	43.668	4.336	35.973	-0.14697	0.23438	0.08252	3.467	101.637	1283.895	-1.311	0.91455	-0.18848	-84.0207	-1.372	12.9478	-0.020508	0.0024414	-0.16162	-40.357	-29.011	0.45943	0.17549	-0.18506	0.20697
1.602	19.238	139.848	1521.111	-1.6074	1.0703	-0.44092	-158.025	-60.9474	1221.961	-2.3325	1.1435	-0.15605	40.926	-15.5115	27.418	0.19189	-0.18994	0.12695	69.077	17.8336	51.53	-0.16113	0.25244	0.07666	-43.804	73.3407	1279.889	-1.2955	0.89746	-0.18242	-24.369	48.6733	-10.428	-0.032715	0.0058594	-0.16895	-72.008	56.473	-19.5971	0.18023	-0.19154	0.20898
1.604	-37.998	148.3632	1490.1261	-1.5703	1.0566	-0.43359	-237.744	-113.495	1200.548	-2.5796	1.3169	-0.16748	73.0729	0.9915	26.6128	0.20459	-0.2124	0.12598	46.24588	23.6728	5.0425	-0.1665	0.25879	0.068359	-43.677	118.852	1261.1798	-1.2784	0.88291	-0.17197	-32.4688	-1.519	3.272	-0.062012	0.02832	-0.17578	-79.63	40.3032	-7.8143	0.18045	-0.19685	0.21433
1.606	-35.315	134.3518	1488.565	-1.5439	1.043	-0.4165	-246.6759	-154.979	1200.83	-2.7468	1.4951	-0.18174	60.4617	-33.212	14.9089	0.20557	-0.21826	0.12939	33.944	21.6641	14.035	-0.16846	0.27148	0.0625	-84.59479	128.887	1209.481	-1.2616	0.86689	-0.15986	-24.239	-6.8538	63.0371	-0.087891	0.046875	-0.18335	-76.5005	15.5957	18.8396	0.18604	-0.19727	0.2124
1.608	-55.125	162.597	1445.2392	-1.5244	1.0254	-0.4043	-238.8009	-160.086	1187.13	-2.8262	1.6645	-0.1916	54.8689	-33.199	45.565	0.2124	-0.23193	0.12939	51.0422	55.776	18.82568	-0.17016	0.27784	0.057617	-80.392	107.651	1178.8192	-1.2481	0.85303	-0.14873	-13.589	-2.039	70.571	-0.12256	0.063477	-0.18506	-113.622	60.25999	14.2263	0.18429	-0.19697	0.21035
1.61	-90.53	131.7693	1429.9404	-1.5	1.0049	-0.39355	-244.8798	-202.81	1154.974	-2.7887	1.7895	-0.18496	70.8251	23.3254	29.9755	0.21045	-0.23877	0.13379	-2.468	44.971	1.201	-0.16406	0.28418	0.051758	-53.862	162.8294	1144.4398	-1.23	0.83447	-0.14111	-9.941	-11.3702	95.2449	-0.18213	0.088867	-0.19824	-98.547	-17.015	21.0292	0.18486	-0.18923	0.2139
1.612	-29.734	118.60477	1401.706	-1.4839	1.0005	-0.37842	-190.639	-184.016	1116.816	-2.6582	1.8137	-0.19844	31.578	8.6305	16.4527	0.21191	-0.24463	0.13916	18.419	32.2392	28.3945	-0.16699	0.28809	0.037109	-78.714	154.211	1134.243	-1.2121	0.81445	-0.13311	24.195	82.145	139.81553	-0.2251	0.10449	-0.20654	-98.9686	18.643	13.192	0.17897	-0.18652	0.21659
1.614	-96.773	126.944	1340.889	-1.4507	0.97314	-0.36475	-204.655	-116.06521	1068.24	-2.4277	1.7305	-0.24609	38.7636	48.423	22.0576	0.2002	-0.25342	0.13721	-14.548	29.6917	18.583	-0.15967	0.28223	0.025391	-65.39852	186.931	1123.6194	-1.1892	0.79502	-0.12588	33.9438	76.956	224.196	-0.31689	0.13867	-0.22363	-122.924	41.4837	-3.453	0.17322	-0.17586	0.21896
1.616	-91.752	99.872	1350.87	-1.4209	0.95752	-0.34937	-203.373	-78.175	1090.951	-2.1115	1.5319	-0.30048	37.4648	40.017	8.4151	0.19531	-0.25098	0.1416	-67.17988	5.533	44.8172	-0.15918	0.28271	0.0024414	-69.1183	232.286	1080.989	-1.1653	0.77041	-0.1208	41.264	50.017	345.742	-0.4065	0.17774	-0.22901	-84.1788	-8.1955	27.2379	0.16162	-0.1665	0.21826
1.618	-81.866	133.996	1325.729	-1.3809	0.94141	-0.33301	-146.772	-15.002	1111.7155	-1.7858	1.2766	-0.34414	-17.83	-12.8033	16.8617	0.18555	-0.2417	0.14307	-20.118	1.849	90.5286	-0.16846	0.29273	-0.014893	-94.997	214.155	1057.2622	-1.1402	0.74101	-0.11563	77.423	102.573	428.379	-0.51465	0.22461	-0.23633	-73.4692	73.743	15.1001	0.14318	-0.15314	0.22246
1.62	-103.743	163.271	1283.788	-1.3335	0.92139	-0.32373	-166.523	-30.051	1081.054	-1.4995	1.0161	-0.375	-19.787	14.94169	21.25	0.17675	-0.23364	0.14599	-72.7644	-16.2545	78.8575	-0.18066	0.30273	-0.027344	-53.2753	236.708	1046.953	-1.1094	0.70898	-0.10986	100.112	55.48863	521.933	-0.69727	0.30078	-0.24463	-62.5069	41.5831	-0.0909	0.12688	-0.1343	0.22911
1.622	-35.5338	158.2976	1279.2899	-1.3101	0.90869	-0.31494	-169.764	-86.106	1071.717	-1.2851	0.80362	-0.38584	-38.149	-8.55409	-12.60503	0.16748	-0.22363	0.14648	-110.193	-21.0021	87.8923	-0.22217	0.31885	-0.054199	-88.7343	218.6408	1002.541	-1.0754	0.67949	-0.1	107.342	73.4845	704.078	-0.80859	0.35254	-0.24609	-38.499	16.384	16.6572	0.10618	-0.11554	0.23065
1.624	-43.0952	189.74	1262.3122	-1.2559	0.88672	-0.29736	-132.3686	-90.659	1064.732	-1.1401	0.65479	-0.40674	-53.018369	-6.315	3.0029	0.15234	-0.20752	0.14307	-67.995	8.716	111.826	-0.25781	0.32617	-0.069824	-123.379	180.495	973.307	-1.0463	0.64473	-0.093652	79.468	70.81	852.493	-1.0562	0.46533	-0.23779	-52.0388	61.646	24.8314	0.078039	-0.092687	0.22823
1.626	-35.7458	191.9204	1232.8638	-1.2224	0.86987	-0.28149	-139.001	-161.207	1068.519	-1.0391	0.57949	-0.4417	-49.7176	42.079	0.0799999999999983	0.14258	-0.19336	0.14307	-135.545	3.689	166.254	-0.33936	0.35303	-0.10791	-94.0106	197.48996	950.085	-1.0143	0.61348	-0.091308	40.7659	15.8998	967.994	-1.2785	0.56176	-0.22046	-14.676	-1.946	37.648	0.055664	-0.072754	0.22754
1.628	34.548	194.383	1225.4194	-1.1875	0.84375	-0.26953	-90.936	-182.13	1096.9928	-0.94131	0.54463	-0.46202	-106.934	11.4859	-19.39621	0.13037	-0.17871	0.14697	-143.625	-22.4828	276.607	-0.41968	0.38794	-0.14209	-113.516	178.201	951.69939	-0.97969	0.57383	-0.087988	24.227	35.302	1041.9283	-1.5244	0.66406	-0.19922	1.588	29.6442	40.6709	0.030562	-0.048042	0.22715
1.63	7.341	241.025	1178.1601	-1.1445	0.79883	-0.24414	-60.509	-215.233	1075.618	-0.84326	0.53213	-0.46474	-85.859	44.7822	-11.1584	0.11938	-0.16528	0.14649	-141.5414	-20.9953	369.585	-0.52637	0.42627	-0.1709	-52.5829	204.1315	968.451	-0.94629	0.54297	-0.087891	-18.65	9.507	1099.564	-1.8706	0.81104	-0.17529	14.268	59.502	27.5241	0.0069246	-0.026069	0.2252
1.632	15.901	204.4586	1176.885	-1.1255	0.77979	-0.23926	-25.117	-310.779	1086.847	-0.75205	0.53135	-0.46065	-67.2	53.2248	-11.007	0.10352	-0.15039	0.14746	-170.945	-28.229	483.12	-0.68701	0.48584	-0.20898	-4.732	236.077	935.601	-0.91055	0.51347	-0.080957	-60.695	-14.512	1191.463	-2.0483	0.88916	-0.16357	56.1121	14.4948	39.2647	-0.015726	-0.0030209	0.22324
1.634	50.367	234.544	1140.9383	-1.0894	0.73682	-0.21631	18.936	-305.245	1127.762	-0.6792	0.52197	-0.46436	-116.547	9.978	1.92026	0.088379	-0.12598	0.14648	-107.151	-15.2417	646.376	-0.78271	0.52588	-0.21436	-19.966	207.521	909.996	-0.86933	0.49043	-0.078711	-86.178	-16.103	1238.465	-2.3706	1.0728	-0.13477	33.758	70.61	33.8332	-0.034085	0.017776	0.21504
1.636	50.99995	259.293	1057.323	-1.0625	0.70605	-0.20532	18.652	-310.932	1169.555	-0.62324	0.50469	-0.47744	-88.406	29.2912	29.1319	0.077637	-0.11572	0.14502	-142.7073	-7.7017	783.78	-1.0293	0.61914	-0.21973	22.591	204.908	881.611	-0.83262	0.46309	-0.074414	-166.0541	-101.105	1211.628	-2.5623	1.2478	-0.11304	42.59	35.51	38.843	-0.042969	0.042969	0.21387
1.638	89.791	228.29	1048.58	-1.0356	0.67822	-0.18701	44.687	-318.898	1269.0736	-0.57686	0.48115	-0.49521	-84.776	7.9061	15.8178	0.056641	-0.096191	0.14648	-165.6287	-35.359	896.354	-1.2447	0.70655	-0.23535	12.866	189.8293	844.3495	-0.78945	0.43867	-0.066504	-185.478	-148.676	1214.721	-2.7124	1.4517	-0.093262	68.6805	14.0113	61.242	-0.058788	0.06455	0.20293
1.64	61.87128	250.167	1037.1168	-0.99512	0.64258	-0.1665	76.3765	-265.927	1327.869	-0.55107	0.44912	-0.50303	-70.728	15.178	19.4575	0.048095	-0.079346	0.14697	-96.758	-35.38	993.509	-1.478	0.80225	-0.25146	35.705	167.69	799.516	-0.75	0.41211	-0.063477	-185.9883	-155.633	1206.622	-2.793	1.6914	-0.09668	44.73254	70.007	35.5906	-0.068847	0.087401	0.19551
1.642	31.733	209.359	1001.5432	-0.97021	0.62744	-0.15479	60.363	-274.698	1341.469	-0.54668	0.41924	-0.51201	-41.7868	47.601	14.9116	0.033691	-0.062988	0.14258	-97.857	-61.485	1079.0921	-1.7871	0.95898	-0.26367	73.164	180.226	749.66767	-0.70303	0.38799	-0.063769	-211.48427	-187.277	1183.676	-2.7695	1.7598	-0.11084	35.575	-13.5124	61.076	-0.080957	0.10576	0.18301
1.644	65.9556	172.4865	990.402	-0.93066	0.5957	-0.13184	82.308	-242.7895	1358.053	-0.56641	0.38867	-0.51563	-63.488	7.4254	18.5187	0.016602	-0.040039	0.14209	-47.615	-74.677	1184.55	-1.937	1.0347	-0.26416	40.7912	162.66	692.3117	-0.65586	0.36387	-0.062988	-166.131	-121.994	1146.829	-2.5894	1.7524	-0.16797	53.097	-24.60275	84.8729	-0.096484	0.12588	0.16299
1.646	-6.909	208.33602	948.938	-0.88892	0.56787	-0.11865	69.3426	-196.594	1344.9925	-0.61445	0.37793	-0.50469	-28.996	37.203	21.1362	0.010254	-0.024414	0.14258	-21.547	-70.441	1237.384	-2.2129	1.209	-0.26367	50.48337	162.403	678.5434	-0.61016	0.33691	-0.070019	-167.134	-100.1027	1093.4963	-2.3442	1.625	-0.21265	6.859	-32.3337	54.66	-0.10742	0.15186	0.14844
1.648	21.887	171.011	941.982	-0.85449	0.53906	-0.10645	21.913	-194.7691	1357.2752	-0.70459	0.39112	-0.48623	0.873999999999999	50.725	4.573	-0.0083008	0.0053711	0.13232	0.49	-138.919	1264.269	-2.3828	1.3516	-0.25733	49.1978	206.202	647.5335	-0.5625	0.3083	-0.072363	-157.899	-83.614	1107.6804	-2.0464	1.4321	-0.24854	9.456	-78.766	85.8739	-0.11953	0.17598	0.13096
1.65	32.424	199.2792	929.331	-0.79297	0.50098	-0.094238	49.292	-131.505	1389.031	-0.84795	0.45127	-0.4585	-8.049	20.0151	11.9495	-0.018799	0.026611	0.1294	92.83	-190.276	1281.578	-2.5078	1.498	-0.23828	17.393	232.831	625.143	-0.51904	0.27881	-0.076172	-165.362	-20.234	1126.5293	-1.6934	1.1465	-0.27832	0.0109999999999992	-2.544	102.3015	-0.13702	0.20117	0.10918
1.652	-25.302	243.617	867.556	-0.76563	0.48389	-0.083984	10.655	-127.344	1393.035	-1.0279	0.54971	-0.44024	38.913	40.402	18.4517	-0.032715	0.047852	0.12402	125.5395	-212.791	1282.686	-2.5664	1.6699	-0.19775	59.6224	239.016	627.964	-0.47901	0.25186	-0.074707	-195.354	-48.689	1093.3347	-1.5503	1.02	-0.29053	-37.6408	-42.0974	163.952	-0.16084	0.23203	0.092774
1.654	-33.007	210.2648	845.846	-0.70313	0.44141	-0.075195	-8.55	-154.635	1421.96	-1.2241	0.67041	-0.41748	31.023	19.2354	18.8457	-0.045898	0.083496	0.11621	150.908	-248.86	1305.374	-2.5464	1.729	-0.17627	28.337	226.158	575.91722	-0.43789	0.22461	-0.074316	-169.07	-70.616	1077.3592	-1.375	0.82617	-0.30322	-64.951	-70.4796	239.6638	-0.19492	0.25928	0.067578
1.656	-48.122	242.95	806.9188	-0.65844	0.40698	-0.062255	-7.172	-120.734	1403.341	-1.4146	0.8166	-0.38418	25.736	23.89	39.571	-0.060058	0.11255	0.11182	187.193	-238.855	1316.803	-2.4199	1.7559	-0.15527	13.199	185.961	548.1462	-0.40156	0.19805	-0.073535	-143.411	-75.537	1042.535	-1.313	0.74854	-0.31518	-104.23879	-7.146	274.852	-0.24072	0.28613	0.032227
1.658	-73.9113	203.493	771.646	-0.61328	0.375	-0.050781	-46.235	-151.227	1405.5951	-1.5945	0.98907	-0.36406	70.9922	46.277	32.3715	-0.068848	0.14258	0.10645	149.865	-243.132	1286.9497	-2.2461	1.6914	-0.15649	43.7961	171.002	489.783	-0.37012	0.16894	-0.078125	-166.057	-153.277	1044.542	-1.2813	0.72266	-0.33643	-75.631	-48.935	403.836	-0.29785	0.31719	-0.012109
1.66	-71.95	165.421	745.48	-0.54736	0.33594	-0.038086	-44.821	-130.179	1472.207	-1.7511	1.1707	-0.36367	39.1698	26.827	24.7045	-0.081543	0.18115	0.098145	191.617	-234.3121	1278.092	-2.0332	1.584	-0.14746	-27.5092	154.737	435.949	-0.33789	0.14648	-0.079102	-118.5425	-149.923	1069.342	-1.2266	0.70898	-0.36816	-90.4291	6.074	555.393	-0.37568	0.35205	-0.056543
1.662	-94.7828	211.37	664.5526	-0.51758	0.31445	-0.03418	-58.3498	-99.469	1479.832	-1.8754	1.3386	-0.3836	81.265	43.738	69.083	-0.091797	0.19141	0.098633	213.493	-173.816	1262.3866	-1.7515	1.4263	-0.10156	-11.988	128.822	431.9661	-0.30713	0.12705	-0.07793	-45.603	-177.4671	1060.402	-1.1836	0.69727	-0.37305	-122.868	27.808	687.973	-0.46592	0.4001	-0.096385
1.664	-121.464	159.496	627.315	-0.45801	0.27588	-0.021973	-89.313	-155.445	1517.5439	-1.9512	1.459	-0.41309	47.86	40.715	38.749	-0.10889	0.22314	0.088867	173.683	-126.446	1244.913	-1.646	1.3481	-0.084961	-25.659	146.354	395.9789	-0.27959	0.10625	-0.076367	-19.268	-257.738	1100.6619	-1.0874	0.68408	-0.37549	-96.635	-43.604	782.206	-0.58076	0.4624	-0.12783
1.666	-105.747	185.7147	600.46	-0.4148	0.24878	-0.011963	-75.787	-148.054	1542.6087	-1.9738	1.5199	-0.4461	22.02	13.1834	26.6131	-0.125	0.23389	0.078857	202.424	-87.358	1280.5068	-1.5029	1.25	-0.046387	-87.776	136.896	369.1662	-0.25224	0.085937	-0.072852	16.467	-245.055	1124.668	-0.99023	0.65234	-0.39209	-82.048	-8.137	822.981	-0.72852	0.53271	-0.15576
1.668	-130.494	215.5883	535.387	-0.37891	0.22217	-0.003418	-109.376	-158.641	1536.589	-1.9636	1.534	-0.47148	62.5772	31.034	21.0493	-0.13916	0.25	0.065918	123.415	-70.979	1246.945	-1.4331	1.2139	-0.020996	-47.1845	138.782	352.194834	-0.23193	0.06914	-0.07666	30.4106	-308.365	1151.761	-0.94385	0.62549	-0.40576	-63.314	-44.94	947.729	-0.9084	0.61094	-0.1833
1.67	-117.812	171.1591	517.6046	-0.32666	0.18701	0.012207	-112.28	-187.753	1591.07	-1.9586	1.525	-0.475	5.215	2.8093	1.6166	-0.1626	0.26172	0.059082	51.624	-140.533	1243.264	-1.3735	1.1978	-0.0014648	-71.6169	161.5039	317.383	-0.20947	0.054688	-0.07373	65.2878	-312.643	1237.7089	-0.86816	0.56641	-0.43652	-68.86	-71.48	1077.566	-1.1046	0.70284	-0.19746
1.672	-115.368	242.774	474.992	-0.29688	0.16358	0.025391	-75.813	-126.017	1590.944	-1.9783	1.5041	-0.47471	-16.948	-13.1597	32.819	-0.16943	0.26807	0.047363	76.208	-172.939	1233.737	-1.2817	1.188	0.010254	-90.575	132.58	322.175	-0.18984	0.041797	-0.073535	111.489	-256.332	1261.621	-0.81885	0.53028	-0.43945	-87.191	-21.971	1111.003	-1.3226	0.79815	-0.19668
1.674	-106.212	220.9793	440.231	-0.26709	0.13867	0.039063	-93.187	-134.7364	1571.555	-2.0249	1.4751	-0.47217	2.475	2.80391	32.9819	-0.19385	0.27686	0.02832	69.035	-213.6841	1193.008	-1.2202	1.1704	0.019043	-60.4065	125.6333	284.901	-0.17607	0.029199	-0.077539	115.481	-268.22	1315.831	-0.79248	0.49951	-0.44189	-38.1149	-118.082	1086.795	-1.5558	0.90088	-0.18476
1.676	-55.902	196.2477	442.582	-0.23633	0.10938	0.051758	-49.816	-117.8345	1577.604	-2.0955	1.4541	-0.47422	-47.3128	-3.689	6.7841	-0.2107	0.29273	0.010254	91.168	-256.6612	1220.714	-1.0815	1.1099	0.044922	-105.832	120.37	234.89	-0.15928	0.01748	-0.077539	133.33	-215.3554	1356.636	-0.79443	0.46436	-0.43652	7.192	-137.02	1092.99	-1.791	1.0029	-0.17139
1.678	-73.4207	243.755	392.676	-0.22314	0.09375	0.057617	-19.5117	-83.793	1532.569	-2.1874	1.4708	-0.48506	-39.9836	2.8424	74.0767	-0.22803	0.30957	-0.0024414	114.519	-212.375	1223.385	-0.97658	1.0459	0.074951	-63.2654	89.97	221.15497	-0.15098	0.0037109	-0.077246	108.278	-173.592	1364.58	-0.81836	0.46094	-0.42334	62.691	-148.285	1118.1487	-2.0071	1.1098	-0.14971
1.68	-15.092	159.154	374.1043	-0.20215	0.058594	0.07373	-9.232	-117.509	1549.3997	-2.3046	1.5442	-0.49678	-52.8912	-16.516	77.2682	-0.26221	0.34668	-0.022461	52.325	-260.3877	1234.656	-0.88525	0.97119	0.099121	-64.8647	124.079	183.066	-0.14258	-0.0053711	-0.076172	94.177	-178.2654	1388.0573	-0.91016	0.50391	-0.38086	118.4206	-220.686	1162.976	-2.2071	1.2215	-0.15176
1.682	26.623	162.6046	375.3746	-0.18554	0.043457	0.081543	22.86523	-66.493	1565.2462	-2.4312	1.6372	-0.50987	-114.565	-48.971	91.7836	-0.28467	0.36768	-0.032715	33.9576	-305.791	1275.718	-0.81055	0.85547	0.10791	-82.287	136.979	184.3511	-0.13486	-0.0091796	-0.072852	94.155	-119.815	1398.732	-1.0378	0.57544	-0.35522	114.256	-168.509	1125.3711	-2.3559	1.3336	-0.1623
1.684	-7.436	180.3854	331.38193	-0.17822	0.024902	0.085938	2.7953	-47.096	1535.404	-2.5205	1.7188	-0.51123	-46.652	-1.1799	128.4351	-0.34912	0.39111	-0.057129	-4.8155	-289.192	1295.657	-0.78271	0.79346	0.10205	-16.846	130.925	173.6836	-0.13047	-0.014356	-0.07002	72.9029	-143.809	1413.2914	-1.1938	0.67041	-0.33936	115.862	-203.334	1091.463	-2.4233	1.4368	-0.17041
1.686	40.8515	122.7588	324.446	-0.16846	-0.00048828	0.095703	57.951	-47.817	1536.762	-2.538	1.7605	-0.49228	-79.134	-8.574	148.214	-0.41236	0.41773	-0.080078	-61.2217	-346.557	1344.970463	-0.75635	0.67334	0.061035	-37.9523	151.376	126.921	-0.12578	-0.021777	-0.067286	82.8072	-145.471	1448.6998	-1.3965	0.83398	-0.31641	162.687	-210.6738	1096.692	-2.4063	1.5049	-0.17285
1.688	23.675	179.821	294.0804	-0.16162	-0.0058594	0.10156	81.965	20.103	1544.462	-2.4694	1.7579	-0.471	-158.038	-40.7603	238.119	-0.4834	0.44678	-0.10986	-51.87	-287.892	1384.97	-0.76441	0.59253	0.01294	-39.4335	111.4339	114.076	-0.12217	-0.027734	-0.068946	81.375	-103.337	1432.864	-1.4907	0.92139	-0.31494	169.451	-119.341	1085.838	-2.3023	1.5121	-0.15557
1.69	42.0078	160.4338	255.4725	-0.15723	-0.025391	0.10938	71.548	7.078	1559.6459	-2.3272	1.6923	-0.46709	-123.8591	-23.07486	356.753	-0.59961	0.48828	-0.15918	-110.503	-225.6558	1370.164	-0.77881	0.52832	-0.043457	-3.167	95.5808	108.864	-0.11768	-0.029785	-0.069336	22.3254	-127.794	1427.757	-1.6499	1.1118	-0.32959	199.637	-108.446	1085.363	-2.1432	1.4806	-0.14199
1.692	66.6332	133.5626	258.2614	-0.15478	-0.032959	0.11866	127.046	12.239	1601.421	-2.1598	1.5719	-0.47148	-131.06574	-2.863	466.867	-0.66895	0.51172	-0.17627	-123.27	-216.486	1421.276	-0.81592	0.48389	-0.07666	-8.728	95.795	84.8702	-0.10713	-0.03291	-0.069043	-8.104	-89.062	1469.977	-1.7426	1.2407	-0.36376	216.77	-43.44	1071.0462	-1.9554	1.4153	-0.12051
1.694	51.1926	172.922	212.615	-0.15576	-0.038574	0.12354	102.019	45.814	1571.8783	-2.0034	1.4399	-0.46436	-95.098	42.315	647.729	-0.83936	0.56299	-0.2041	-97.528	-163.173	1412.8994	-0.8418	0.4707	-0.098633	58.5676	55.3157	94.8806	-0.09541	-0.040527	-0.070996	-27.40768	-78.35	1495.076	-1.812	1.3452	-0.40088	122.769	-38.99	1064.738	-1.7756	1.3494	-0.085059
1.696	55.2992	96.369	188.3612	-0.15674	-0.035156	0.13379	77.765	-17.435	1578.157	-1.897	1.3175	-0.46054	-101.4475	36.3596	768.776	-0.99584	0.61255	-0.22021	-91.283	-200.478	1382.718	-0.92188	0.46582	-0.1543	37.0344	82.249	59.6667	-0.080176	-0.040527	-0.077637	-60.5637	-133.221	1541.934	-1.8882	1.4263	-0.43506	75.471	-122.196	1086.3816	-1.6382	1.2954	-0.04248
1.698	73.9642	111.4462	198.7659	-0.15869	-0.038086	0.1333	115.587	-22.6777	1608.7973	-1.8335	1.2192	-0.45713	-116.8318	-36.0114	869.453	-1.1733	0.68018	-0.2334	-55.362	-210.1576	1409.089	-1.0234	0.51074	-0.19336	22.616	78.3992	61.02501	-0.067579	-0.050977	-0.079492	-64.678	-100.217	1568.098	-1.9272	1.4536	-0.44482	58.628	-121.989	1064.5811	-1.5642	1.2615	-0.0064454
1.7	42.16986	151.916	161.61756	-0.16064	-0.038086	0.14014	121.748	-46.495	1571.6925	-1.8057	1.1485	-0.44541	-55.362	-43.944	950.989	-1.4365	0.78906	-0.23828	-59.139	-170.89	1414.749	-1.0854	0.5415	-0.21729	78.748	70.365	87.8588	-0.056152	-0.054199	-0.077637	-108.212	-124.011	1559.6705	-2.0483	1.5024	-0.45654	81.701	-175.5922	1057.3952	-1.5175	1.2462	0.030859
1.702	55.6452	101.2714	163.556	-0.1521	-0.032471	0.13818	96.449	-81.733	1591.109	-1.7993	1.0948	-0.43311	-46.092	-53.572	1029.4332	-1.5737	0.85205	-0.23633	-39.264	-194.101	1452.492	-1.2422	0.62891	-0.27246	29.279	100.208	70.79926	-0.04336	-0.064746	-0.080664	-108.577	-145.212	1613.403	-2.1697	1.5442	-0.4646	128.405	-216.051	1060.1537	-1.4835	1.2458	0.05
1.704	40.266	188.815	145.7902	-0.146	-0.029297	0.14209	118.654	-26.6537	1568.0495	-1.7988	1.0566	-0.4209	-36.5625	-55.662	1121.838	-1.8394	0.98096	-0.21436	2.547	-137.741	1452.84	-1.3886	0.72852	-0.30176	28.111	72.58191	88.285	-0.034082	-0.071289	-0.07793	-99.311	-86.3887	1618.712	-2.3047	1.5938	-0.48047	96.242	-188.888	1075.8066	-1.4258	1.2386	0.047461
1.706	14.944	171.154	122.7632	-0.13818	-0.027832	0.13525	54.16	-60.342	1557.247	-1.8006	1.035	-0.41621	5.198	-52.733	1160.621	-2.0156	1.084	-0.18896	-1.558	-152.35033	1445.9924	-1.5527	0.85938	-0.31934	67.42381	48.882	71.2748	-0.029004	-0.080664	-0.074414	-111.217	-113.9468	1614.319	-2.4897	1.6841	-0.5249	64.56	-251.5	1132.9084	-1.3379	1.2344	0.054199
1.708	-6.218	134.748	111.986	-0.12988	-0.021484	0.13135	28.444	-40.603	1549.387	-1.7956	1.0173	-0.41386	-4.9866	-108.189	1150.687	-2.1699	1.1973	-0.1626	28.9377	-193.219	1498.637	-1.812	1.0942	-0.32568	-5.906	49.8862	34.0441	-0.029297	-0.088379	-0.07002	-73.891	-86.564	1604.0683	-2.562	1.729	-0.54736	30.561	-267.532	1161.951	-1.2363	1.2166	0.054785
1.71	-42.1424	184.631	85.98	-0.11328	-0.020996	0.12109	25.7135	15.7182	1522.065	-1.7835	1.006	-0.41934	59.775	-123.251	1169.945	-2.3027	1.3672	-0.14063	33.052	-161.941	1506.315	-1.959	1.2324	-0.32129	36.271	13.8363	38.4259	-0.032227	-0.095703	-0.070313	-53.134	-60.83082	1546.072	-2.6563	1.8379	-0.5918	-28.952	-299.04	1185.187	-1.1394	1.1986	0.053515
1.712	-48.12714	87.72264	95.6247	-0.093993	-0.017578	0.11596	-14.131	-2.993	1519.118	-1.7528	0.99482	-0.42686	129.1133	-105.22	1168.1403	-2.3281	1.4492	-0.12402	-11.163	-191.517	1531.192	-2.2788	1.5103	-0.30469	9.157	34.937	15.258	-0.032129	-0.095899	-0.064453	-54.693	-102.82	1585.197	-2.6171	1.8838	-0.58618	-28.94016	-351.36	1255.9149	-1.0573	1.1704	0.05625
1.714	-64.7353	74.930805	90.14487	-0.074219	-0.019531	0.1084	7.007	57.5986	1515.7742	-1.7129	0.97852	-0.42773	106.2588	-152.945	1202.827	-2.2656	1.5684	-0.11084	10.809	-173.6133	1581.358	-2.5079	1.6978	-0.29443	-33.825	44.8861	22.6755	-0.039844	-0.097461	-0.057422	-18.9558	-36.6234	1592.3922	-2.4258	1.8828	-0.51953	-75.9066	-299.854	1291.956	-0.98928	1.1392	0.044726
1.716	-110.606	59.245	65.848	-0.051758	-0.015625	0.10645	-50.454	83.621	1469.905	-1.6759	0.96279	-0.43271	147.582	-154.864	1198.755	-2.1502	1.6038	-0.10034	33.82	-134.723	1589.732	-2.6938	1.8833	-0.28271	1.212	29.8632	44.5805	-0.048047	-0.094726	-0.048047	0.1422	-45.4766	1582.4725	-2.4824	1.8672	-0.7041	-112.857	-246.059	1324.839	-0.94238	1.1113	0.036621
1.718	-96.79	-16.409	61.2992	-0.035156	-0.015137	0.10205	-66.8933	79.25426	1455.4266	-1.6461	0.95	-0.42754	137.132	-183.008	1130.7729	-1.9937	1.5981	-0.089355	42.25	-173.92	1589.432	-2.6675	2.0728	-0.18408	-63.1414	61.231	37.778	-0.058984	-0.091993	-0.039941	43.149	-54.2585	1599.894	-2.4058	1.8911	-0.7583	-111.317	-193.591	1338.734	-0.90879	1.0834	0.014746
1.72	-102.886	58.5376	43.103	-0.018066	-0.020508	0.10449	-66.068	142.678	1423.268	-1.6227	0.94219	-0.42363	136.55	-203.371506	1160.335	-1.7632	1.5259	-0.093262	93.4587	-128.36	1580.47	-2.5737	2.0981	-0.12256	-74.9475	34.7833	58.083	-0.069336	-0.08252	-0.031738	65.88	-2.224	1578.654	-2.1128	1.8188	-0.68701	-144.112	-124.262	1337.304	-0.87725	1.0575	-0.010254
1.722	-93.092	34.635	43.5453	-0.00024415	-0.023438	0.10229	-100.364	120.514	1406.5041	-1.6101	0.93916	-0.40869	156.304	-110.141	1167.113	-1.6489	1.4771	-0.088379	52.4688	-115.715	1548.6926	-2.7866	2.1372	-0.36426	-49.708	37.071	60.1998	-0.077735	-0.074316	-0.026172	79.195	-32.2107	1586.351	-1.9478	1.6749	-0.6294	-106.133	-156.288	1380.36968	-0.84951	1.0329	-0.043457
1.724	-87.5188	19.0648	59.3647	0.010254	-0.026367	0.10254	-89.682	121.1925	1409.339	-1.6035	0.93359	-0.39502	109.814	-49.526	1149.57	-1.4707	1.3691	-0.055664	24.55	-142.793	1556.2212	-2.6443	2.1946	-0.4143	-103.23	55.5367	33.9383	-0.08291	-0.065527	-0.017383	100.336	13.312	1605.9009	-1.8413	1.5552	-0.61084	-56.816	-173.807	1421.4623	-0.83516	1.0097	-0.081152
1.726	-102.791	86.144	31.743	0.026855	-0.038086	0.095703	-96.825	128.182	1369.017	-1.6031	0.9291	-0.38906	111.036	-40.518	1184.332	-1.3948	1.2981	-0.025635	24.554	-109.858	1560.9189	-2.4277	2.1387	-0.3457	-77.316	9.9261	43.878	-0.090332	-0.063183	-0.0060546	111.193	57.384	1590.5398	-1.7393	1.4355	-0.59766	-80.221	-164.8642	1444.036	-0.83105	0.99414	-0.12207
1.728	-65.57	10.3133	38.22775	0.039551	-0.041016	0.096191	-118.076	74.728	1346.875	-1.5918	0.93437	-0.37529	57.582	-33.686	1142.499	-1.3398	1.2422	-0.00048828	-24.84	-131.691	1528.814	-2.1929	1.9653	-0.24756	-78.6126	12.1652	12.724	-0.09082	-0.058985	-0.00097658	131.847	12.7821	1614.87	-1.6968	1.3813	-0.58643	-46.68836	-183.8386	1476.025	-0.84521	0.97666	-0.16768
1.73	-67.2703	11.1441	57.6924	0.054688	-0.055176	0.090332	-91.087	100.049	1327.385	-1.573	0.93203	-0.36631	-19.04237	-105.842	1155.32993	-1.2847	1.2036	0.019531	-5.807	-129.307	1529.941	-2.1211	1.8984	-0.23975	-111.277	5.469	16.75	-0.089844	-0.053711	0.0073242	158.523	36.2813	1619.091	-1.646	1.2837	-0.55811	-26.37	-138.9556	1470.471	-0.87793	0.97793	-0.19834
1.732	-81.277	37.011	42.7183	0.070312	-0.061035	0.087891	-98.127	102.408	1287.106	-1.5478	0.929	-0.36084	24.06	-138.4251	1176.3581	-1.252	1.1895	0.021484	-1.52500000000001	-74.282	1486.399	-2.002	1.8066	-0.24707	-72.3053	-22.0793	38.578	-0.086914	-0.051074	0.013183	141.267	-5.8837	1586.282	-1.6342	1.2261	-0.52294	-5.4304	-142.043	1472.2105	-0.92832	0.98535	-0.23116
1.734	-26.972	-28.5071	45.32	0.086914	-0.07373	0.083984	-91.18	89.074	1281.65273	-1.5112	0.92236	-0.35107	32.712	-190.7587	1148.502	-1.1675	1.1606	0.03418	-73.628	-90.424	1474.584	-1.9187	1.7561	-0.2478	-91.502	22.0477	35.16859	-0.081934	-0.046387	0.022071	153.385	-38.011	1595.319	-1.6323	1.186	-0.48975	37.416	-165.881	1496.185	-0.98505	1.0016	-0.25635
1.736	-14.784	36.2034	30.5531	0.10449	-0.09082	0.074707	-36.022	133.3961	1257.424	-1.4682	0.9083	-0.35225	28.674	-259.342	1179.634	-1.0898	1.1401	0.053223	-77.3909	-16.769	1490.878	-1.8413	1.6958	-0.24463	-76.7574	-6.995	53.922	-0.070996	-0.050293	0.025195	178.281	8.5536	1584.9537	-1.6328	1.1563	-0.4585	18.23784	-131.752	1514.256	-1.0469	1.0176	-0.26758
1.738	-15.383	14.8272	18.2363	0.11963	-0.096191	0.075684	-51.9284	106.0825	1225.244	-1.4137	0.8916	-0.34219	53.1876	-235.142	1192.5285	-1.0127	1.0996	0.065918	-91.712	-0.354999999999997	1492.698	-1.7363	1.5762	-0.21729	-37.163	6.03475	54.3479	-0.062793	-0.053808	0.028711	120.376	-28.6292	1576.026	-1.6304	1.1509	-0.44385	35.4099	-170.531	1541.284	-1.1056	1.008	-0.30957
1.74	18.534	-11.9493	28.221	0.14014	-0.11475	0.071289	-13.135	118.7747	1224.5841	-1.3601	0.86543	-0.33437	25.8282	-256.112	1183.247	-0.92773	1.0371	0.070801	-107.639	-35.337	1512.92978	-1.689	1.5093	-0.18896	-73.364	30.6322	15.1647	-0.051758	-0.058105	0.033691	102.166	3.955	1556.338	-1.6133	1.1445	-0.42871	56.137	-172.7538	1582.6374	-1.1742	0.99854	-0.36514
1.742	16.76	71.078	10.8402	0.15699	-0.12305	0.070313	1.606	164.498	1208.042	-1.3009	0.83193	-0.32959	16.0739	-266.545	1252.666	-0.89844	0.99023	0.05957	-91.4053	-21.458	1505.1615	-1.6167	1.4067	-0.18115	-4.493	-2.96172	31.9832	-0.039161	-0.067383	0.039063	98.638	40.2349	1504.5022	-1.5959	1.1433	-0.41089	56.792	-162.4512	1613.378	-1.2644	1.0051	-0.40772
1.744	49.9328	-6.8743	15.1514	0.17041	-0.13037	0.070313	-14.441	149.0433	1176.778	-1.2456	0.80322	-0.31885	-21.3186	-247.798	1291.743	-0.86279	0.91162	0.01123	-143.011	-77.462	1474.337	-1.5739	1.3528	-0.19336	-9.983	20.0636	9.0302	-0.02998	-0.076758	0.041015	69.672	23.875	1508.3456	-1.5698	1.1411	-0.40039	109.935	-202.4989	1634.391	-1.3907	1.0327	-0.44151
1.746	61.33236	9.2294	24.8911	0.18506	-0.14404	0.065918	44.749	191.442	1143.518	-1.1931	0.76748	-0.31279	-83.7849	-291.719	1326.422	-0.85717	0.85083	-0.036377	-112.6593	-76.193	1484.5609	-1.5405	1.3052	-0.20215	-33.006	19.7446	11.70009	-0.016308	-0.094727	0.039453	57.825	90.607	1509.78473	-1.5352	1.1191	-0.37695	152.101	-156.041	1581.925	-1.5625	1.085	-0.47168
1.748	42.0292	10.3306	18.27383	0.18848	-0.15039	0.066406	19.394	197.563	1080.133	-1.1432	0.73525	-0.30205	-66.558	-239.221	1381.859	-0.85547	0.80078	-0.083984	-113.354	-17.3709	1452.7124	-1.5073	1.2466	-0.20068	30.466	-11.168388	35.6498	-0.0093748	-0.10391	0.043945	-1.49279	74.126	1487.7406	-1.519	1.1079	-0.36816	113.036	-152.432	1561.6011	-1.7808	1.1786	-0.49365
1.75	50.329	-65.479	33.5836	0.19336	-0.15771	0.069336	22.456	187.529	1054.77828	-1.1011	0.70635	-0.29267	-95.65	-172.027	1377.9	-0.88672	0.74609	-0.12695	-136.93	-29.956	1445.363	-1.5029	1.2207	-0.19482	6.938	32.151	-6.952	0.0043945	-0.11426	0.04248	-22.1456	78.1968	1479.411	-1.4902	1.0801	-0.34766	128.623	-150.7596	1568.4286	-2.0336	1.3125	-0.50078
1.752	64.3747	11.5104	24.0128	0.19385	-0.1626	0.070313	62.189	221.635	1034.3594	-1.0607	0.67832	-0.27969	-129.454	-197.228	1404.975	-0.91162	0.729	-0.13623	-77.6964	2.84	1457.1433	-1.4961	1.1855	-0.19189	23.023	21.7455	19.3193	0.015136	-0.12403	0.041113	-45.686	125.101	1411.6175	-1.4775	1.0498	-0.3374	91.231	-86.305	1553.461	-2.2875	1.4719	-0.48594
1.754	59.8205	2.1681	27.959	0.19189	-0.16162	0.077148	13.205	206.475	1002.4993	-1.0249	0.65186	-0.26514	-78.513	-157.688	1393.457	-0.97217	0.6958	-0.14307	-102.08	0.7778	1418.991	-1.493	1.1638	-0.18652	49.0657	23.8479	21.2186	0.028808	-0.13389	0.03916	-92.224	80.159	1381.0827	-1.4604	1.021	-0.32373	77.613	-108.685	1535.0459	-2.5207	1.6535	-0.45625
1.756	40.792	-19.2986	35.631	0.19043	-0.1709	0.08252	16.707	199.127	984.015	-0.98654	0.62793	-0.25469	-71.223	-173.355	1382.982	-1.033	0.70264	-0.14502	-86.1053	-21.4288	1429.8952	-1.4902	1.1465	-0.18701	10.342	40.347	14.0067	0.041308	-0.13818	0.031347	-71.814	99.681	1369.3233	-1.4312	0.979	-0.30615	86.1534	-103.439	1524.3492	-2.6616	1.8267	-0.38428
1.758	7.075	57.455	17.9841	0.18701	-0.16699	0.083008	6.711	201.299	965.1526	-0.95039	0.60273	-0.24238	-42.5094	-178.334	1429.726	-1.1035	0.72852	-0.14697	-61.933	38.276	1417.423	-1.4746	1.1201	-0.17969	47.8509	2.18764	23.9061	0.057715	-0.14687	0.022949	-65.985	133.7683	1330.924	-1.4238	0.95898	-0.30078	12.385	-91.203	1508.756	-2.6698	1.9431	-0.28642
1.76	19.852	-4.2036	9.2545	0.17773	-0.16162	0.089844	-30.786	172.75319	922.189	-0.91523	0.58008	-0.23184	-22.769	-109.401	1441.972	-1.1914	0.75977	-0.17188	-85.165	41.613	1395.644	-1.4629	1.1074	-0.1748	32.909	9.7752	-2.3423	0.072266	-0.16113	0.015137	-85.105	105.749	1306.847	-1.3784	0.92432	-0.28271	-1.44	-119.633	1517.247	-2.923	2.0466	-0.41123
1.762	-0.704999999999998	23.096	2.0752	0.16797	-0.1538	0.093994	-13.249	189.0605	916.5483	-0.87754	0.55762	-0.2165	-38.398	-143.1118	1461.998	-1.2437	0.7876	-0.18311	-35.838	61.97	1371.549	-1.4258	1.0723	-0.1665	-11.93	12.2528	-0.98596	0.094824	-0.17109	0.0077147	-73.574	141.92	1273.858	-1.3469	0.89965	-0.26953	-39.459	-55.556	1490.228	-2.9288	2.1891	-0.45537
1.764	-33.2144	58.501	-1.714	0.15723	-0.14551	0.097656	-32.361	199.131	890.4578	-0.84131	0.53271	-0.20801	7.98399999999999	-129.2101	1464.1104	-1.3652	0.87695	-0.20801	-43.376	95.18	1341.67108	-1.4009	1.0522	-0.16285	37.918	-12.7915	28.2591	0.11407	-0.18213	-0.0035156	-106.859	112.124	1249.113	-1.3081	0.87744	-0.26367	-61.3555	-17.963	1511.7513	-2.7917	2.2056	-0.3833
1.766	-38.192	-21.44	13.011	0.13477	-0.13086	0.10547	-67.4517	190.2481	884.297	-0.80147	0.5044	-0.19063	27.086	-166.772	1458.021	-1.4853	0.97117	-0.22632	-44.042	71.8101	1318.8884	-1.3765	1.0278	-0.14502	-4.278	38.7974	2.713	0.12695	-0.18955	-0.016016	-107.956	95.353	1267.7349	-1.2646	0.85156	-0.24951	-62.8302	-17.675	1536.06311	-2.6499	2.1509	-0.32129
1.768	-67.2836	41.1945	-0.345000000000001	0.12451	-0.12695	0.10596	-60.506	200.251	867.825	-0.76192	0.48086	-0.17881	10.604	-238.83	1503.836	-1.625	1.0879	-0.22998	30.814	105.0301	1332.8644	-1.3418	0.99414	-0.14014	-17.07	25.8064	3.451	0.14297	-0.19893	-0.030274	-72.648	157.9947	1214.3128	-1.2402	0.83203	-0.24219	-122.493	-4.602	1528.136	-2.4725	2.0717	-0.29072
1.77	-73.3424	25.2986	-17.5871	0.099121	-0.10596	0.10938	-128.88	180.5023	813.116	-0.7209	0.45469	-0.16162	21.01472	-205.906	1502.799	-1.8672	1.2891	-0.21436	41.848	130.99	1300.0506	-1.3218	0.97705	-0.13623	-7.818	26.174	14.6342	0.15723	-0.20898	-0.041504	-84.436	142.5618	1181.759	-1.1929	0.8042	-0.22119	-132.086	-54.06	1523.908	-2.2831	1.9619	-0.26474
1.772	-86.985	1.7688	-6.4905	0.078125	-0.090332	0.11157	-88.939	159.801	780.821	-0.67842	0.4294	-0.14756	-25.4849	-215.522	1497.1551	-2.0059	1.3984	-0.21289	39.322	113.82547	1279.396	-1.2866	0.94482	-0.12744	-71.0871	48.2191	16.3822	0.16152	-0.22012	-0.059473	-48.0248	172.5567	1181.4903	-1.1582	0.77491	-0.21387	-139.102	-54.43	1522.677	-2.1023	1.8443	-0.2503
1.774	-112.181	80.217	-0.215999999999999	0.055176	-0.078125	0.11572	-91.1997	170.975	736.8434	-0.63623	0.40479	-0.13184	-13.628	-210.34	1534.9349	-2.2881	1.6035	-0.20703	65.34933	150.736	1274.9657	-1.2585	0.92407	-0.11865	-30.89	10.891	42.598	0.1664	-0.22529	-0.068555	-32.4275	201.909	1135.44	-1.1226	0.74902	-0.19775	-137.932	-19.311	1501.8281	-1.9558	1.7285	-0.23223
1.776	-86.785	21.154	12.10927	0.032715	-0.052246	0.11816	-141.332	156.788	691.947	-0.59297	0.379	-0.11846	13.088	-138.658	1519.7643	-2.4624	1.7515	-0.1936	52.0855	114.949	1237.5364	-1.2329	0.90869	-0.11475	-68.69815	38.2825	10.6176	0.16563	-0.22607	-0.083008	-30.23	175.727	1125.96969	-1.0869	0.70703	-0.18311	-126.572	-46.9231	1501.132	-1.8276	1.6177	-0.19971
1.778	-91.3019	44.6709	16.482	0.013672	-0.039063	0.11914	-114.0497	153.527	655.2619	-0.55146	0.35713	-0.099123	8.53	-172.478	1539.651	-2.5815	1.8892	-0.18311	68.1664	89.48663	1230.9684	-1.1968	0.8833	-0.11182	-87.851	41.1702	14.3468	0.15772	-0.22285	-0.09746	45.9766	224.243	1105.59988	-1.0659	0.68701	-0.17822	-149.759	-4.764	1481.7919	-1.7276	1.5052	-0.1748
1.78	-106.326	72.7327	-2.453	-0.013672	-0.019531	0.1167	-144.671	148.642	606.679	-0.51084	0.33018	-0.087793	52.983	-131.522	1542.356	-2.6206	2.0337	-0.16211	48.9439	92.7	1214.0329	-1.1831	0.87354	-0.11084	-64.7491	26.5865	40.0128	0.14844	-0.21533	-0.10986	26.745	209.938	1078.9873	-1.0293	0.64258	-0.15771	-150.406	-11.088	1468.5792	-1.6534	1.4138	-0.16074
1.782	-81.902	-16.5514	22.99458	-0.032227	-0.0014648	0.11865	-141.085	139.743	584.9694	-0.46748	0.30459	-0.068261	19.743	-112.586	1490.057	-2.5933	2.0747	-0.14941	-6.197	73.698	1203.703	-1.1523	0.85693	-0.10742	-100.036	69.258	11.786	0.1378	-0.21113	-0.11924	54.975	194.794	1077.434	-0.99318	0.61084	-0.15186	-110.668	-31.049	1463.9511	-1.5847	1.3357	-0.1623
1.784	-69.5368	50.2566	39.835	-0.047363	0.0083008	0.11328	-114.15	158.7736	553.3952	-0.43115	0.27783	-0.054688	-2.771	-153.124	1502.8302	-2.312	2.0591	-0.035645	10.778	106.7328	1165.6376	-1.125	0.83936	-0.10424	-93.711	44.5314	18.2079	0.12285	-0.20068	-0.13193	77.5969	217.287	1021.799	-0.95898	0.57813	-0.13867	-120.945	26.0393	1460.3848	-1.522	1.2773	-0.16113
1.786	-53.0596	16.5098	27.021	-0.062012	0.02832	0.1167	-122.781	175.4675	515.2785	-0.39492	0.25108	-0.040527	23.057	-91.369	1522.173	-2.4241	2.0149	-0.18164	-34.0963	142.756	1110.821	-1.0977	0.81641	-0.1001	-64.67202	37.002	21.2574	0.11035	-0.18662	-0.1456	48.467	180.657	970.7572	-0.90479	0.54346	-0.12207	-112.675	25.779833	1464.199	-1.4668	1.2246	-0.16406
1.788	-25.988	-1.7724	27.0629	-0.067383	0.037109	0.1084	-77.577	173.6639	489.7989	-0.36182	0.22461	-0.026465	-39.217	-88.141	1495.5691	-2.4194	2.0532	-0.28027	-26.4905	131.529	1109.6733	-1.0571	0.78369	-0.094238	-100.811	47.8457	24.78	0.094824	-0.17021	-0.15684	75.42996	194.836	958.5612	-0.87891	0.52051	-0.11768	-48.064	58.187	1466.857	-1.4224	1.1859	-0.1666
1.79	-29.6468	66.184	20.5606	-0.083496	0.053711	0.104	-60.513	196.937	451.492	-0.32939	0.20078	-0.019434	-41.103	-94.817	1489.8851	-2.2397	2.0181	-0.22119	18.4576	157.302	1099.6909	-1.0347	0.76221	-0.096191	-60.7443	7.217	54.522	0.079102	-0.15234	-0.1665	51.975	194.4181	926.7152	-0.81738	0.48877	-0.10156	-51.836	120.469	1396.296	-1.3862	1.154	-0.16348
1.792	-10.992	3.27317	28.9282	-0.093261	0.064697	0.094971	-84.1057	170.8845	414.761	-0.30274	0.17656	-0.0064452	-56.626	-29.576	1444.125	-2.1504	1.9277	-0.15307	6.082	147.79814	1079.55	-0.98779	0.7251	-0.095215	-54.685	26.2859	39.8	0.062793	-0.12969	-0.18135	21.967	161.353	903.545	-0.77197	0.45996	-0.090576	-24.442	79.133	1383.93887	-1.3585	1.1255	-0.17012
1.794	8.573	31.827	43.093	-0.10156	0.078613	0.087891	-5.23099999999999	136.454	401.8523	-0.27832	0.15039	0.0014648	-109.2077	-55.915	1457.199	-2.083	1.8574	-0.13086	-11.44	146.7348	1060.546	-0.95556	0.69922	-0.095215	-63.3825	10.664	48.5263	0.046875	-0.10937	-0.19707	11.119	213.9558	884.0016	-0.72852	0.43945	-0.081543	-1.226	94.708	1370.752	-1.3307	1.1057	-0.16982
1.796	23.853	64.609	23.5116	-0.11133	0.10205	0.088867	-10.154	136.028	364.117	-0.25986	0.1293	0.015625	-85.7214	-11.879	1515.7092	-1.9795	1.7734	-0.14307	-26.5715	168.713	1029.0722	-0.92188	0.66797	-0.094238	-17.458	-43.3802	83.8389	0.02461	-0.0875	-0.2041	-15.867	219.931	845.87877	-0.66699	0.39893	-0.065918	-4.209	77.62137	1340.62	-1.3105	1.0859	-0.1665
1.798	43.2365	0.2824	24.5706	-0.1167	0.1084	0.086426	-3.562	115.816	352.458	-0.24043	0.11426	0.028614	-103.07	11.725	1510.4301	-1.9194	1.7231	-0.14697	-69.139	150.101	990.46126	-0.88281	0.63184	-0.093262	-44.47	-2.605	106.1921	-0.0015623	-0.061719	-0.21367	-20.028	225.657	853.833	-0.63867	0.37842	-0.058594	60.147	56.212	1325.378	-1.288	1.0624	-0.16719
1.8	28.496	63.227	52.1717	-0.13086	0.12695	0.077148	54.538	128.885	346.2053	-0.22754	0.099414	0.03291	-135.722	-59.374	1518.38081	-1.8003	1.604	-0.1499	-34.1075	153.986	960.4509	-0.86035	0.61133	-0.091797	-12.403	-16.6292	125.8274	-0.03418	-0.030762	-0.2168	-26.215	239.349	831.987	-0.5835	0.34277	-0.04248	45.884	123.748	1285.8898	-1.2607	1.0341	-0.16601
1.802	57.2881	37.149	47.111	-0.14209	0.1377	0.070068	17.974	147.03	300.204	-0.21123	0.084863	0.03916	-115.9719	-49.8728	1517.432	-1.7185	1.5061	-0.13721	-57.5132	175.4105	893.501	-0.81787	0.58984	-0.088379	44.9202	-14.066	169.641	-0.081641	-0.0048829	-0.22032	-74.061	198.3337	788.844	-0.54395	0.3125	-0.03125	56.42313	92.12836	1282.435	-1.2275	1.0079	-0.15821
1.804	50.8757	11.70018	42.377	-0.14844	0.15186	0.050293	54.803	122.1519	283.9831	-0.19531	0.074707	0.046875	-152.143	-94.915	1488.403	-1.6558	1.4165	-0.12744	-55.545	155.3	863.515	-0.78686	0.56616	-0.083008	2.278	24.0264	242.042	-0.1374	0.020996	-0.23076	-61.331	199.04344	755.98	-0.50781	0.28906	-0.018066	102.3294	85.322	1268.8752	-1.1866	0.97529	-0.15401
1.806	61.6033	63.234	39.9909	-0.1626	0.15625	0.037109	63.20791	126.73	253.632	-0.18516	0.060352	0.054981	-127.4204	-87.442	1464.9539	-1.5835	1.3315	-0.12842	-33.172	174.847	847.8	-0.75049	0.54834	-0.084473	26.8332	-18.1151	344.581	-0.20186	0.049121	-0.24561	-114.182	192.4757	709.9186	-0.46484	0.25586	-0.0043945	82.61698	102.8584	1215.0667	-1.1484	0.93164	-0.14648
1.808	47.108	-21.3921	95.289	-0.16797	0.17041	0.035645	17.196	101.072	232.6455	-0.17227	0.054883	0.062012	-86.031	10.598	1453.9163	-1.5542	1.2954	-0.14014	-83.188	189.331	824.121	-0.70117	0.51855	-0.083008	60.147	34.52	428.802	-0.28145	0.085644	-0.25537	-143.257	159.085	681.1611	-0.43067	0.23218	0.0068359	54.37	61.077	1206.745	-1.1126	0.9001	-0.14228
1.81	20.102	-45.0584	102.8677	-0.18994	0.19238	0.023438	61.6167	73.245	230.819173	-0.16055	0.046289	0.067871	-99.9508	-6.267	1472.524	-1.5098	1.2363	-0.1499	-22.438	169.156	817.969	-0.67676	0.50586	-0.08252	83.617	41.4126	532.231	-0.37305	0.12891	-0.27441	-88.761	185.072	633.0481	-0.40186	0.20996	0.015625	22.041	112.595	1192.7314	-1.0711	0.8623	-0.13877
1.812	16.37	-26.892	93.159	-0.23291	0.20459	0.0039063	24.554	109.5625	197.672	-0.1541	0.034278	0.075879	-77.5555	12.915	1481.2525	-1.4802	1.2014	-0.14966	-5.493	173.122	795.238	-0.6167	0.4751	-0.07959	99.438	13.01318	677.084	-0.48057	0.17754	-0.27783	-147.892	182.135	571.563	-0.36182	0.18311	0.028809	-13.751	100.7315	1159.7643	-1.0356	0.83223	-0.13799
1.814	8.041	-96.3505	109.9936	-0.25391	0.21338	-0.0048828	12.635	96.25419	186.0118	-0.14307	0.030762	0.087891	-79.9579	26.5195	1464.8923	-1.4565	1.1743	-0.146	-18.0362	151.97645	754.319	-0.56934	0.44336	-0.080566	45.1954	54.408	795.786	-0.61094	0.2334	-0.27441	-148.95	177.351	542.362	-0.34229	0.17236	0.032227	-8.434	68.95727	1152.428	-1.0011	0.80127	-0.13213
1.816	-19.635	-39.483	158.2128	-0.32031	0.22363	-0.040039	32.432	117.489	165.309799	-0.13399	0.023437	0.085352	-89.8801	-9.20119	1468.147	-1.4297	1.1514	-0.146	53.7062	144.7389	730.7607	-0.51758	0.41602	-0.076172	37.998	18.8538	922.8461	-0.77109	0.30215	-0.26387	-113.508	188.0113	510.111	-0.30615	0.14844	0.045898	-30.848	140.3517	1108.2386	-0.96777	0.77539	-0.12939
1.818	-65.4682	-77.9088	229.3829	-0.38623	0.23804	-0.064697	-10.321	142.171	149.9524	-0.12314	0.017481	0.086524	-53.771	57.55	1429.2108	-1.4102	1.1387	-0.1416	44.328	175.4413	688.087	-0.45068	0.36963	-0.08252	33.435	9.001	1006.661	-0.97127	0.38691	-0.24473	-175.994	163.5204	489.254	-0.28101	0.12646	0.049805	-19.491	103.362	1091.1455	-0.93809	0.75293	-0.12256
1.82	-73.718	-86.241	320.1974	-0.45947	0.26025	-0.091797	-11.813	121.675	146.214	-0.11534	0.017871	0.094727	-85.008	70.997	1403.6961	-1.3711	1.1133	-0.13428	34.0268	159.056	663.6441	-0.4165	0.34814	-0.08252	-54.383	17.917	1080.262	-1.1934	0.49121	-0.21777	-133.675	180.4838	489.9404	-0.25684	0.10742	0.05127	-16.179	118.772	1065.8837	-0.90908	0.72998	-0.12109
1.822	-85.211	8.2193	423.981	-0.58789	0.30273	-0.1123	-47.847	146.876	132.4736	-0.10576	0.018164	0.10059	-89.975	67.873	1394.364	-1.3415	1.092	-0.12671	74.714	154.0026	637.9494	-0.34619	0.29736	-0.084961	-50.507	-40.813	1169.478	-1.4491	0.61689	-0.18428	-107.9462	189.3109	437.8559	-0.23486	0.083008	0.057129	-65.236	172.7187	996.26	-0.87236	0.70811	-0.12422
1.824	-108.78005	-14.4824	584.566	-0.66162	0.32764	-0.12061	-91.564	136.1416	113.4476	-0.095703	0.020996	0.10498	-58.096	112.279	1356.157	-1.3159	1.0669	-0.12207	33.14018	147.802	590.2026	-0.29541	0.25634	-0.09253	-88.563	-47.9281	1177.329	-1.7277	0.74659	-0.15381	-89.30926	164.767	405.7727	-0.22803	0.072266	0.058105	-67.7863	133.035	984.7474	-0.83282	0.675	-0.12715
1.826	-130.7859	1.514	729.199	-0.83643	0.3833	-0.13037	-44.031	95.47722	110.221	-0.086328	0.021192	0.10312	-45.496	57.744	1343.83469	-1.2754	1.0371	-0.11523	66.981	107.165	551.481	-0.24414	0.21094	-0.097168	-161.802	-95.178	1193.854	-2.0069	0.89307	-0.13076	-69.5497	174.454	386.946	-0.21143	0.053223	0.05957	-55.5393	180.4623	952.482	-0.79102	0.64063	-0.12793
1.828	-121.1226	6.0542	799.82	-0.99192	0.42602	-0.13892	-99.509	108.9758	73.865	-0.074707	0.018555	0.10313	-14.134	62.7087	1348.393	-1.2554	1.0259	-0.11377	58.8158	150.581	502.0923	-0.18604	0.15137	-0.10352	-160.117	-178.371	1219.833	-2.28	1.045	-0.11709	-70.2145	166.088	350.4188	-0.20556	0.041504	0.060303	-70.256	157.262	915.5652	-0.74356	0.60761	-0.13408
1.83	-100.0272	-71.9916	854.744	-1.1592	0.48242	-0.14893	-113.889	66.402	61.6875	-0.059082	0.02168	0.10117	-6.55	84.4123	1318.1446	-1.2197	0.98828	-0.11084	27.88245	154.698	470.8304	-0.15918	0.12109	-0.10449	-243.1994	-164.337	1196.704	-2.5156	1.2148	-0.11035	-29.299	159.87	333.2676	-0.20264	0.033203	0.064453	-55.5838	121.339	898.8051	-0.69922	0.57305	-0.13408
1.832	-109.467	-31.046	934.7869	-1.3965	0.57617	-0.14844	-84.9875	54.27328	67.5345	-0.045801	0.019336	0.098145	-4.627	61.778	1310.656	-1.1882	0.95923	-0.10864	71.945	161.452	468.9942	-0.11133	0.069336	-0.10742	-222.334	-171.588	1209.684	-2.6751	1.4081	-0.093457	41.517	177.636	312.0508	-0.20166	0.02832	0.070801	-89.329	168.4985	845.969	-0.66015	0.53242	-0.13525
1.834	-123.907	-24.299	1008.383	-1.5156	0.62598	-0.14648	-147.428	77.8158	52.7517	-0.033203	0.01709	0.098633	45.807	109.12873	1272.8572	-1.1528	0.93506	-0.10303	56.222	183.845	435.86117	-0.076172	0.021973	-0.10547	-179.461	-134.969	1141.905	-2.7609	1.6016	-0.07832	10.656	148.514	262.4747	-0.20068	0.026855	0.072754	-114.125	131.949	826.782	-0.61806	0.49697	-0.13789
1.836	-116.234	-36.308	1036.739	-1.7319	0.73486	-0.13818	-98.5642	57.2783	70.135	-0.019824	0.017188	0.088868	-4.484	74.397	1226.711	-1.1172	0.9043	-0.10205	41.8747	144.511	403.4058	-0.060059	0.00048828	-0.10547	-238.982	-84.64832	1068.524	-2.7686	1.7298	-0.091602	48.492	129.4158	248.491	-0.2002	0.028809	0.078613	-91.26	171.8366	826.9841	-0.58594	0.46191	-0.13965
1.838	-71.293	-16.162	996.91	-1.8611	0.8186	-0.12695	-97.653	89.637	54.8892	-0.0038086	0.010254	0.085156	7.617	34.594	1228.464	-1.1089	0.88721	-0.09375	58.565	134.758	374.743	-0.036133	-0.035645	-0.10156	-201.809	-100.4363	1090.197	-2.6537	1.7607	-0.12451	58.6008	125.642	207.684	-0.19556	0.027832	0.076905	-68.187	213.929	782.7244	-0.55235	0.43281	-0.13887
1.84	-52.781	-116.207	951.8114	-1.9683	0.90479	-0.11182	-101.359	76.0792	53.1643	0.0075196	0.01377	0.083204	17.961	74.321	1221.675	-1.0781	0.8584	-0.090332	-1.269	163.9033	329.545	-0.022461	-0.060059	-0.11036	-197.472	-43.81	1061.997	-2.4946	1.6724	-0.21826	31.395	122.4219	194.9445	-0.19336	0.032227	0.07666	-43.90198	150.0454	767.128	-0.51982	0.40342	-0.1375
1.842	-2.819	-123.156	995.9349	-2.0527	1.0244	-0.10059	-61.5898	38.7878	65.89196	0.019824	0.00625	0.07627	-42.4947	81.298	1204.809	-1.0613	0.83374	-0.093018	23.628	143.5268	317.106	-0.0063477	-0.07959	-0.11133	-224.279	-51.465	1056.074	-2.3265	1.5427	-0.36358	85.193	126.745	199.6062	-0.18311	0.036621	0.077148	-20.386	186.709	727.2879	-0.49365	0.37647	-0.13789
1.844	34.091	-96.391	1006.5123	-2.0659	1.0767	-0.093262	-80.6043	66.015	43.111	0.024902	-0.00048828	0.07373	-43.1761	123.9666	1185.8579	-1.0352	0.80664	-0.088867	-3.685	188.29	273.113	0.0029297	-0.093262	-0.11816	-187.581	-77.823	1054.0859	-2.0215	1.3838	-0.39687	48.4876	115.1206	192.0845	-0.17627	0.040039	0.077148	-3.239	158.2789	675.6513	-0.46201	0.35117	-0.13711
1.846	31.665	-141.539	991.178	-2.0137	1.1621	-0.080078	-46.2552	29.123	41.7078	0.029004	-0.0095703	0.071289	-46.26113	148.786	1144.2836	-1.0063	0.77002	-0.086914	-44.565	169.7479	247.2732	0.0078125	-0.10254	-0.11865	-202.71	-47.262	1010.832	-1.709	1.165	-0.34766	53.509	113.44	180.082	-0.16553	0.049805	0.086426	45.5317	127.906	678.7297	-0.42725	0.33447	-0.13477
1.848	53.7741	-109.783	970.313	-1.9294	1.1946	-0.057373	3.354	19.9149	51.573	0.030566	-0.018262	0.070606	-59.4306	119.3606	1111.3902	-0.99219	0.75195	-0.085938	-12.4525	114.4167	237.0496	0.019531	-0.10889	-0.11963	-180.591	-77.918	1018.205	-1.5084	1.0002	-0.32832	59.4213	135.741	140.712	-0.15552	0.054688	0.078125	64.333	195.7349	636.52519	-0.39502	0.30869	-0.13692
1.85	65.274	-98.039	938.2623	-1.8223	1.1934	-0.038574	-36.4464	43.4239	49.014	0.031738	-0.028418	0.065918	5.785	146.059	1069.7563	-0.96045	0.72314	-0.088379	-69.475	119.7795	209.275	0.021485	-0.11426	-0.12524	-123.9971	-88.149	1020.608	-1.3887	0.89258	-0.33594	10.351	135.1194	114.8155	-0.14551	0.0625	0.075195	61.704	131.38	602.7651	-0.3586	0.28623	-0.1377
1.852	86.2925	-77.825	944.452223	-1.668	1.1445	-0.024902	12.35	8.396	55.522	0.034277	-0.038184	0.065821	-35.665	138.1266	1048.5197	-0.9331	0.69775	-0.089599	-67.858	97.701	208.956	0.021484	-0.11426	-0.12842	-152.719	-98.353	1024.016	-1.3228	0.84365	-0.36104	32.605	136.1785	115.3929	-0.1333	0.070313	0.078125	80.888	138.1016	571.7499	-0.33008	0.26084	-0.13731
1.854	85.499	36.529	958.122	-1.5913	1.106	-0.030273	46.392	29.226	35.9285	0.041504	-0.046875	0.05957	-49.4268	133.791	1038.3027	-0.90576	0.67529	-0.085449	-50.8729	108.1632	213.7115	0.025879	-0.10645	-0.13623	-77.1588	-178.45941	1060.13	-1.2604	0.81064	-0.39717	-16.551	130.243	90.6237	-0.12695	0.073242	0.081543	71.784	173.598	511.642	-0.29414	0.23926	-0.1458
1.856	60.3828	10.87	966.75891	-1.4531	1.0449	-0.019043	16.087	29.2004	24.9741	0.04541	-0.059961	0.059766	-20.418	157.5731	1008.502	-0.875	0.64941	-0.08252	-84.208	145.359	192.1545	0.023926	-0.10498	-0.13818	-19.231	-216.691	1064.093	-1.1843	0.76885	-0.41475	-48.048	97.4867	73.9388	-0.12256	0.078613	0.084473	51.8442	136.319	501.6074	-0.26172	0.21582	-0.13867
1.858	17.955	-20.24	1006.652	-1.365	1.01	-0.0085449	70.1161	1.5609	35.246	0.052051	-0.072656	0.057324	-77.55	129.117	960.153	-0.86133	0.63867	-0.083008	-54.4114	92.0093	167.756	0.016602	-0.093262	-0.14209	-47.9744	-270.954	1093.254	-1.0987	0.72998	-0.41787	-22.046	80.942	77.543	-0.11743	0.07959	0.088623	56.4338	212.164	479.873	-0.23105	0.18965	-0.1457
1.86	7.835	-60.279	965.6197	-1.3037	0.98242	0.0078125	43.5324	28.212	21.3635	0.06416	-0.084375	0.056543	-23.385	153.311	936.853	-0.82764	0.61182	-0.083496	-63.2357	108.298	147.653	0.0083007	-0.092529	-0.14453	15.058	-298.843	1152.42	-1.0015	0.69092	-0.42236	-101.377	77.7996	65.603	-0.11328	0.080078	0.086426	64.879	190.841	431.5592	-0.20088	0.16533	-0.1459
1.862	11.161	-187.27	957.3423	-1.2534	0.95752	0.01416	62.0806	-6.6049	31.0738	0.072266	-0.098046	0.055371	-25.138	179.1341	911.475	-0.79932	0.59839	-0.081055	-76.027	92.1185	130.3243	-0.0019531	-0.085449	-0.14307	56.642	-261.841	1198.503	-0.90615	0.64697	-0.43857	-84.5149	67.2562	77.116	-0.1084	0.07666	0.093262	68.0401	151.898	411.1641	-0.17393	0.14111	-0.14668
1.864	40.688	-200.215	971.302	-1.2261	0.94971	0.0058594	62.9798	-22.007808	32.0006	0.081055	-0.10791	0.053223	-74.6602	162.104	889.283	-0.77295	0.57861	-0.091309	-21.924	57.934	148.21	-0.012695	-0.080078	-0.14063	74.0935	-246.091	1241.238	-0.81553	0.60186	-0.46045	-80.911	70.922	46.4229	-0.10693	0.076172	0.092285	38.5585	190.187	365.718	-0.14551	0.11699	-0.15254
1.866	64.27	-214.4084	961.7983	-1.1621	0.94238	-0.0058594	13.298	6.54923	30.4165	0.093653	-0.11748	0.052832	-31.5698	177.504	876.856	-0.73584	0.56104	-0.095215	-43.0717	104.5985	124.0444	-0.020508	-0.078125	-0.14404	98.923	-191.112	1280.081	-0.73428	0.56201	-0.47412	-144.03	79.21291	12.55	-0.104	0.072266	0.091797	38.6751	130.053	349.733	-0.12256	0.096191	-0.15381
1.868	51.039	-244.3218	988.2119	-1.1015	0.93799	-0.010498	35.05	-25.1572	43.838	0.10391	-0.12744	0.056152	-75.367	188.759	851.1046	-0.71436	0.55127	-0.10156	-37.0354	74.224	102.454	-0.029297	-0.072754	-0.14453	52.3365	-153.058	1289.661	-0.68164	0.52402	-0.47949	-70.7207	72.3475	20.003	-0.098633	0.072022	0.096193	54.7586	151.1295	355.0248	-0.10146	0.074512	-0.15361
1.87	24.617	-203.8841	1015.541	-1.0371	0.94141	-0.010742	26.412	19.1999	34.1115	0.11445	-0.13643	0.058886	-33.4186	168.3542	851.271	-0.66943	0.53076	-0.10645	9.793	53.0326	96.5179	-0.030762	-0.068359	-0.14379	85.27	-164.6076	1329.094	-0.6499	0.50342	-0.46729	-77.923	59.246	26.236	-0.092285	0.06543	0.091797	5.092	185.744	303.1294	-0.086524	0.055566	-0.15244
1.872	-24.2142	-263.381	1069.619	-0.9707	0.94531	-0.0073242	-12.1	38.65258	24.466	0.12061	-0.14492	0.059961	12.831	179.364	814.95535	-0.63745	0.51441	-0.11059	-11.538	78.2037	71.752	-0.032227	-0.070313	-0.1416	83.112968	-124.065	1335.3785	-0.66211	0.49775	-0.4459	-114.544	36.772	43.4665	-0.081055	0.056641	0.089844	-27.279	133.8967	287.317	-0.069336	0.033691	-0.15362
1.874	-27.165	-277.775	1157.075	-0.94141	0.94141	-0.0073242	3.496	12.3058	28.9725	0.12305	-0.15479	0.06543	-15.119	162.6189	778.4166	-0.60742	0.50293	-0.10889	21.623	39.91434	73.4646	-0.032227	-0.070313	-0.13281	38.672	-139.806	1362.4342	-0.71123	0.51259	-0.42959	-65.8632	24.4345	65.6491	-0.071777	0.053711	0.093262	-45.56098	172.408	259.2756	-0.059082	0.01748	-0.1499
1.876	-57.4889	-249.693	1181.3158	-0.90039	0.93555	-0.015625	-50.0008	37.98	15.146	0.13135	-0.16162	0.069824	27.345	168.7384	746.8832	-0.55811	0.47461	-0.11475	46.84358	76.156	53.3757	-0.030273	-0.070313	-0.13037	88.7848	-150.01	1381.4349	-0.79521	0.54346	-0.41983	-99.703	30.1732	37.86397	-0.053223	0.04248	0.085938	-51.741	146.827	228.346	-0.052246	0.0019531	-0.14795
1.878	-102.6249	-267.376	1220.525	-0.87817	0.91919	-0.040528	-53.6081	6.579	11.1719	0.13633	-0.16553	0.071582	32.1457	195.602	712.4697	-0.53662	0.46729	-0.11865	15.646	63.611	54.4498	-0.029785	-0.070801	-0.12109	45.54	-127.887	1371.497	-0.90606	0.59161	-0.41621	-87.775	28.95	44.62	-0.0354	0.033203	0.080322	-68.5278	107.362	237.15486	-0.041895	-0.010156	-0.14922
1.88	-144.483	-174.817	1268.588	-0.86523	0.89355	-0.062988	-17.746	-11.73711	15.435	0.13672	-0.16982	0.076269	22.1612	195.387	681.3809	-0.49902	0.4375	-0.12598	41.0584	21.366	73.532	-0.028564	-0.076172	-0.11059	-6.061	-130.071	1395.8347	-1.0249	0.65088	-0.40869	-48.7467	35.7795	27.62684	-0.01416	0.019531	0.068359	-71.844	143.1544	209.613	-0.040039	-0.023438	-0.13838
1.882	-190.439	-123.749	1238.38112	-0.8667	0.87061	-0.11328	-110.255	6.094	-12.9889	0.13711	-0.1709	0.081348	79.07	183.5993	645.8066	-0.46338	0.41651	-0.12841	16.629	51.141	44.048	-0.023926	-0.074219	-0.099121	-11.234	-107.606	1427.76061	-1.1474	0.72119	-0.40557	-65.5181	33.4905	12.7318	0.013184	-0.00097656	0.068359	-105.554	80.083	212.271	-0.037305	-0.033594	-0.14619
1.884	-153.343	-133.603	1242.6162	-0.86865	0.86377	-0.13916	-95.274	-34.8068	10.9859	0.13184	-0.17334	0.086426	37.28538	183.19737	586.6558	-0.43164	0.39648	-0.13232	37.438	7.7338	47.5556	-0.029785	-0.082031	-0.087891	-71.464	-95.881	1465.614	-1.2761	0.79736	-0.38819	-7.418	15.6354	28.7208	0.030762	-0.015137	0.069336	-106.91	88.6688	208.9312	-0.036816	-0.043652	-0.14756
1.886	-141.51	-82.384	1258.024	-0.89697	0.85742	-0.18701	-85.4987	15.09708	4.23	0.12715	-0.17295	0.092285	30.519	154.957	573.3777	-0.38574	0.36523	-0.12744	68.25767	1.5394	39.7577	-0.034668	-0.083008	-0.07959	-65.3331	-135.0043	1506.703	-1.3933	0.88174	-0.37647	9.467	22.2947	32.3003	0.049805	-0.033203	0.067383	-88.379	106.5276	164.6196	-0.032715	-0.052246	-0.14697
1.888	-93.972	-115.751	1310.397	-0.94678	0.86572	-0.19824	-128.809	33.0161	-9.2431	0.12129	-0.17334	0.085547	32.301	173.191	552.603	-0.36035	0.34814	-0.13086	-0.0250000000000021	27.4831	30.6305	-0.044922	-0.07373	-0.065918	-67.5267	-134.3659	1492.6063	-1.4991	0.9626	-0.38232	9.536	0.4352	43.802	0.067383	-0.049316	0.063721	-95.32	52.0621	157.9434	-0.035547	-0.061621	-0.14912
1.89	-63.9424	-122.524	1378.753	-1.0176	0.88086	-0.19336	-71.506	13.8575	12.8324	0.11074	-0.171	0.091797	-3.898	202.273	524.8122	-0.3252	0.31934	-0.13477	35.182	-12.904	34.0214	-0.058106	-0.071778	-0.058349	-142.006	-172.441	1515.2912	-1.5854	1.0356	-0.40576	62.5099	-17.19625	47.243	0.080566	-0.064453	0.064453	-71.1783	114.1706	148.2067	-0.036425	-0.072949	-0.14609
1.892	-83.274	-93.9487	1380.103	-1.1465	0.91602	-0.17773	-113.495	54.694	-4.8483	0.09746	-0.16709	0.089941	42.6229	193.677	537.957	-0.29639	0.2959	-0.1333	9.725	22.1279	1.308	-0.066895	-0.063477	-0.052246	-95.057	-191.966	1546.198	-1.6496	1.0684	-0.45547	44.805	5.2409	28.2994	0.10254	-0.083496	0.067871	-64.6489	89.717	114.5814	-0.033691	-0.074512	-0.14883
1.894	-81.856	-153.43	1390.09	-1.2124	0.94287	-0.16357	-96.799	29.1158	9.2642	0.081055	-0.16064	0.087891	23.3975	207.685	480.675	-0.26855	0.26953	-0.13623	-20.804	22.09103	5.7236	-0.075432	-0.053847	-0.045919	-120.62	-162.488	1536.326	-1.7026	1.0841	-0.50498	78.747	12.1245	22.8564	0.10986	-0.09668	0.064941	-59.6225	45.98	111.26058	-0.035644	-0.079785	-0.15264
1.896	-57.169	-162.971	1428.692	-1.353	1.0083	-0.13428	-62.3855	12.0594	23.69	0.067578	-0.14795	0.083594	8.508	179.534	451.4481	-0.23145	0.23877	-0.13916	22.563	-24.6011	40.6429	-0.080202	-0.048588	-0.041446	-153.003	-177.663	1554.113	-1.7812	1.0915	-0.52686	98.129	18.9455	26.6238	0.125	-0.11182	0.078613	-46.1486	86.952	87.961	-0.039551	-0.081543	-0.15332
1.898	-31.04	-181.255	1451.603	-1.4548	1.0506	-0.13062	-83.9012	39.013425	8.127	0.055566	-0.13477	0.083301	45.10472	180.418	421.037	-0.21484	0.22754	-0.14453	-42.352	25.6023	18.8762	-0.080574	-0.045395	-0.039297	-84.432	-141.958	1550.745	-1.8994	1.1006	-0.5334	41.417	16.6554	33.793	0.13453	-0.12598	0.082276	-34.4906	24.3	92.4894	-0.040527	-0.082129	-0.15244
1.9	-43.782	-211.765	1480.348	-1.5547	1.0879	-0.14502	-11.702	4.371	24.89295	0.038379	-0.11211	0.084082	-22.5756	201.476	356.199	-0.17969	0.19336	-0.14404	-37.265	3.526	25.8989	-0.083393	-0.03914	-0.035645	-98.455	-96.6843	1511.403	-2.0503	1.1333	-0.53174	80.6436	-4.4113	34.391	0.146	-0.13477	0.086914	15.816	47.5778	100.998	-0.046484	-0.084277	-0.15234
1.902	-31.769	-143.1226	1508.547	-1.6777	1.1465	-0.16602	-11.418	31.221	14.3839	0.019141	-0.090527	0.083301	-13.368	154.604	345.5188	-0.15332	0.17188	-0.14697	-36.9296	4.8873	26.7012	-0.08252	-0.035645	-0.035645	-92.969	-99.562	1509.157	-2.233	1.2026	-0.53476	49.6393	10.81415	7.1955	0.15137	-0.1499	0.090332	41.60484	76.748	69.70815	-0.053125	-0.087402	-0.14765
1.904	-12.114	-139.5248	1522.17664	-1.7383	1.1758	-0.16699	-26.493	43.5161	12.4451	-0.0024414	-0.067871	0.081055	2.309	141.8566	327.6253	-0.12988	0.14893	-0.1499	-102.703	43.3374	14.3007	-0.075785	-0.030152	-0.032082	-63.8932	-56.5973	1508.136	-2.4139	1.2997	-0.53857	28.055	2.035	25.744	0.16016	-0.15137	0.092773	51.1561	21.896	51.8289	-0.055176	-0.092578	-0.14678
1.906	23.182	-148.11	1572.035	-1.8862	1.2642	-0.14893	17.431	19.5785	12.55456	-0.025781	-0.041016	0.080078	-63.0949	121.917	294.9546	-0.094238	0.125	-0.15039	-67.85444	-9.75524	37.303	-0.069028	-0.027999	-0.02913	-71.484	-58.7003	1512.521	-2.5624	1.4247	-0.55108	47.501	-4.6831	50.805	0.16455	-0.16162	0.099121	32.983	74.67	42.2628	-0.062012	-0.10059	-0.1416
1.908	39.4088	-114.816	1572.844	-2.0232	1.344	-0.14209	4.204	65.85	7.3509	-0.046679	-0.017969	0.080859	-17.174	94.982	300.9678	-0.080078	0.11084	-0.15137	-55.911	25.9417	-1.2715	-0.062039	-0.022346	-0.021455	12.7113	-69.8779	1509.5826	-2.6238	1.5492	-0.54531	-31.425	14.24151	15.7344	0.16773	-0.16602	0.10474	23.355	33.712	35.1783	-0.068066	-0.097949	-0.12929
1.91	69.19245	-166.3335	1548.257	-2.1655	1.438	-0.13232	21.362	51.162	24.173	-0.06582	0.0078121	0.078125	-35.95685	136.6564	276.865	-0.043457	0.085938	-0.15967	-95.032	30.124	-24.8669	-0.052007	-0.028178	-0.021555	15.2989	-32.451	1486.667	-2.6523	1.6289	-0.56934	-14.249	-1.1337	18.4035	0.17188	-0.16895	0.10889	46.66	-10.1142	53.5243	-0.080274	-0.10274	-0.1206
1.912	82.09027	-147.2297	1531.8547	-2.3413	1.5854	-0.1123	53.6	29.544	41.935	-0.083594	0.030371	0.069922	-56.992	139.5865	248.6592	-0.019775	0.067138	-0.15674	-61.563478	-13.1798	-2.162	-0.037598	-0.035645	-0.012207	26.134	-51.5104	1498.038	-2.6676	1.6848	-0.67304	-14.5731	3.65	-1.381	0.16992	-0.17432	0.11035	70.5906	44.6225	39.0761	-0.088867	-0.099218	-0.11084
1.914	42.98	-124.151	1490.968	-2.4219	1.6504	-0.10059	22.142	60.645	12.364	-0.096191	0.049805	0.069336	-8.895	135.607	229.52203	0.003418	0.049316	-0.15771	-94.794	40.2617	3.806	-0.029455	-0.054939	-0.017294	89.854	-35.637	1497.894	-2.5539	1.7102	-0.73184	-85.097	10.94865	0.21211	0.16992	-0.17334	0.11035	65.3685	-17.30514	25.4255	-0.09961	-0.10244	-0.10195
1.916	50	-142.113	1503.5717	-2.5405	1.7778	-0.076172	56.80962	13.6835	39.9868	-0.10303	0.076172	0.067969	-77.42	133.612	196.9626	0.036621	0.024902	-0.16748	-78.5141	11.658	29.34707	-0.021605	-0.066996	-0.014126	47.3124	-4.276	1502.208	-2.3371	1.6551	-0.7291	-53.415	-15.5226	26.593	0.16602	-0.17188	0.11523	53.2607	6.8737	23.8825	-0.10742	-0.1001	-0.088379
1.918	63.219	-55.299	1474.3701	-2.4931	1.837	-0.003418	42.962	41.582	41.5929	-0.11113	0.097852	0.065137	-64.7298	74.5904	187.4891	0.049316	0.016602	-0.16895	-34.574	11.1701	30.3312	-0.016181	-0.081407	-0.02086	80.035	-11.324	1530.377	-2.1022	1.5464	-0.71123	-83.4912	14.9213	-16.9683	0.16211	-0.16993	0.11938	43.3456	43.053	4.258	-0.11709	-0.10586	-0.075
1.92	35.015	-56.069	1446.039	-2.5137	1.8184	-0.00048828	21.024	45.997	39.754	-0.11543	0.12285	0.067481	-9.592	63.1115	170.7944	0.077148	-0.013184	-0.17529	-60.6395	55.187	9.719796	-0.014457	-0.095867	-0.014102	101.156	5.735	1545.745	-1.9023	1.4102	-0.7041	-101.318	19.294	-32.15677	0.15137	-0.16602	0.11523	12.807	-4.04957	8.3187	-0.12773	-0.10713	-0.065137
1.922	4.346	-46.227	1480.863	-2.6675	1.8501	-0.16553	57.34	16.5957	60.847	-0.12549	0.1416	0.068066	-50.2666	68.503	155.0411	0.10181	-0.03125	-0.17285	-28.362	4.0912	27.1872	-0.0073242	-0.10791	-0.015137	92.904	-21.591	1540.488	-1.7655	1.2766	-0.71279	-47.68	18.732	-15.2862	0.14355	-0.15625	0.12305	15.851	54.465	14.5644	-0.13203	-0.1087	-0.054981
1.924	-50.426	11.2883	1486.822	-2.6245	1.8755	-0.16992	6.786	59.314	25.7463	-0.13672	0.16309	0.065918	-2.311	38.947	160.149	0.12109	-0.050781	-0.17725	-31.084	39.776	13.3974	-0.0019773	-0.11555	-0.018652	147.362	-48.8143	1534.3417	-1.6766	1.1578	-0.71406	-102.774	42.8457	-3.884	0.13037	-0.15381	0.12354	-16.975	10.0759	15.2353	-0.13535	-0.11192	-0.045118
1.926	-66.334	-8.682	1510.008	-2.4492	1.7773	-0.077148	-4.937	32.0837	27.247	-0.14707	0.17539	0.070117	-0.875	78.1897	122.0967	0.12695	-0.074219	-0.17578	-21.973	54.7396	6.3094	0.0050802	-0.12598	-0.026235	120.504	-24.6733	1521.378	-1.634	1.0566	-0.70898	-83.829	18.462	25.552	0.1123	-0.14355	0.12695	-29.529	-23.7104	32.84798	-0.13818	-0.10889	-0.038574
1.928	-61.507	20.862	1552.664	-2.3357	1.6863	-0.048584	-2.049	10.3492	42.823	-0.1585	0.18486	0.07373	-15.228	68.861	102.0174	0.1333	-0.087402	-0.17578	25.341	10.6824	20.6373	0.011459	-0.12707	-0.028311	105.356	-47.7942	1520.9144	-1.6279	0.9752	-0.6916	-63.3027	33.624	12.8289	0.10107	-0.12745	0.12622	-21.39	42.335	18.469	-0.1376	-0.11357	-0.03125
1.93	-103.8195	27.126	1543.2865	-2.2188	1.6055	-0.054199	-55.504	38.5363	37.5395	-0.17334	0.19424	0.072949	15.577	54.9779	85.1905	0.13525	-0.10254	-0.16602	-1.328	44.537	7.512	0.022634	-0.1347	-0.035822	105.475	-27.2821	1505.5272	-1.645	0.90674	-0.66162	-122.327	46.8337	3.8574	0.087402	-0.11328	0.12402	-75.006	10.9304	3.215	-0.1333	-0.11182	-0.025098
1.932	-133.336	-43.648	1552.4607	-2.0508	1.4805	-0.056152	-32.86	-25.32762	81.2099	-0.18437	0.19883	0.06709	9.574	86.883	53.69	0.12695	-0.12305	-0.16504	46.4724	5.331	30.1304	0.032227	-0.13623	-0.045898	32.9111	21.891	1473.717812	-1.6774	0.86954	-0.63281	-57.83423	13.3168	25.7583	0.075195	-0.088379	0.125	-71.3577	45.7701	15.7857	-0.12901	-0.11494	-0.024316
1.934	-138.321	-24.3694	1531.604	-1.9727	1.4189	-0.0625	-48.3811	-37.2777	79.216	-0.20313	0.20898	0.058105	29.584	33.8728	68.467	0.12402	-0.12988	-0.15674	23.804	4.88505	32.906	0.040894	-0.14017	-0.052313	49.6645	32.2291	1492.883	-1.7082	0.84726	-0.60586	-75.1411	30.686	4.895	0.067383	-0.079102	0.12402	-77.826	60.7104	-6.5994	-0.12226	-0.11679	-0.022168
1.936	-160.264	-45.6982	1492.938	-1.8438	1.2949	-0.0625	-111.166	-32.527	106.321	-0.2291	0.22256	0.045215	38.95	34.696	66.9775	0.098633	-0.14063	-0.13916	6.474	68.815	8.4016	0.051014	-0.14343	-0.062266	67.6667	97.09	1507.4755	-1.7363	0.84024	-0.58321	-64.4039	32.832	-6.8012	0.052246	-0.053223	0.12256	-107.947	-0.136000000000003	-7.27287	-0.11621	-0.12109	-0.021484
1.938	-142.493	-38.006	1516.461	-1.7773	1.2109	-0.060791	-70.2092	-39.8129	143.6007	-0.25439	0.22471	0.037988	0.959999999999999	37.0315	34.23	0.083252	-0.14136	-0.14062	55.5147	24.7137	30.175	0.062295	-0.14886	-0.070504	-20.1133	124.444	1500.016	-1.758	0.85605	-0.56309	-1.886	16.7752	-0.178000000000001	0.046142	-0.031982	0.12183	-88.2962	40.788969	14.8745	-0.10635	-0.12021	-0.019824
1.94	-124.307	30.418	1519.8319	-1.7241	1.1431	-0.070313	-99.4948	19.2285	202.811	-0.29307	0.23916	0.019629	42.432	0.0589999999999993	63.9533	0.064941	-0.14014	-0.1333	24.261	57.377	22.07	0.067491	-0.15195	-0.078613	-16.0267	121.25	1489.807	-1.7656	0.87695	-0.53418	-27.712	29.26859	-5.047	0.036133	-0.0087891	0.12207	-93.696	20.9091	12.2	-0.099023	-0.12344	-0.016407
1.942	-137.987	-15.329	1523.627	-1.6655	1.0767	-0.080566	-138.58	-9.466	269.6207	-0.34473	0.24434	-0.00029308	13.847	41.3565	47.0115	0.04248	-0.13428	-0.11914	-3.234	48.69	20.2046	0.069824	-0.15625	-0.086426	-54.2362	155.647	1439.903	-1.7634	0.91338	-0.51338	29.649	7.6863	29.8177	0.018555	0.010742	0.12012	-103.709	5.225	35.6537	-0.095118	-0.12227	-0.017578
1.944	-150.389	-2.0229	1520.5732	-1.6362	1.0532	-0.088867	-123.34613	-19.3255	379.761	-0.4043	0.25342	-0.024902	9.26	32.595	30.101	0.033691	-0.1333	-0.11328	38.1817	-0.1105	37.4016	0.067795	-0.15128	-0.093056	-100.033	117.084	1409.5992	-1.7564	0.95274	-0.49278	63.5846	40.04	22.1854	0.0017089	0.032471	0.11915	-91.479	52.812	28.2942	-0.084472	-0.12802	-0.016992
1.946	-132.946	23.0414	1486.1675	-1.5996	1.0078	-0.10938	-117.5601	31.975	484.067	-0.4793	0.26855	-0.053125	48.325	29.265	26.097	0.015137	-0.12646	-0.10693	0.783999999999999	52.411	22.579	0.058163	-0.14825	-0.096847	-64.9126	101.88	1415.1288	-1.7424	0.99179	-0.46894	42.7475	73.094	16.7485	-0.016602	0.044434	0.10059	-89.008	15.397	12.5994	-0.075684	-0.12549	-0.01709
1.948	-124.8324	-4.0234	1489.033	-1.569	0.98266	-0.11866	-97.7916	2.255	661.171	-0.56601	0.29394	-0.081933	-26.225	71.671	-11.9016	-0.0026855	-0.11768	-0.095459	-20.95	13.455	46.7091	0.04834	-0.14202	-0.10273	-132.188	119.603068	1387.3179	-1.7155	1.0173	-0.45967	87.208	48.1	58.771	-0.04248	0.068359	0.095215	-73.9478	38.6035	27.9859	-0.074121	-0.13027	-0.016602
1.95	-122.865	79.174	1475.4	-1.543	0.96094	-0.12402	-94.0776	19.1502	791.379	-0.67539	0.31465	-0.10928	16.996	21.3112	-6.40813	-0.01416	-0.11084	-0.091797	0.912999999999997	3.805	53.1793	0.032434	-0.13009	-0.1125	-98.837	87.789	1380.8253	-1.6816	1.0352	-0.43408	47.6831	31.494	96.308	-0.054199	0.080566	0.092773	-60.1199	64.222	11.202	-0.067773	-0.13125	-0.02041
1.952	-115.7944	97.286	1451.5593	-1.5073	0.94189	-0.13086	-83.0206	1.8209	867.021	-0.80634	0.35166	-0.1288	8.629	7.9453	5.288	-0.022461	-0.10156	-0.07959	-52.995	44.55507	26.7003	0.016602	-0.11279	-0.11084	-82.229	115.6999	1367.801	-1.6523	1.0445	-0.41221	29.746	-24.711	91.2864	-0.092773	0.10498	0.083984	-46.849	14.6627	28.5011	-0.065039	-0.1293	-0.023535
1.954	-99.8917	108.738	1450.5933	-1.4888	0.93213	-0.13184	-19.606	-68.649	961.371	-0.96484	0.40576	-0.14307	-32.738	5.951	-2.3528	-0.022949	-0.096191	-0.07666	-23.55	-2.9351	27.6034	0.0027277	-0.096377	-0.1169	-142.244	111.8385	1333.3003	-1.6194	1.0384	-0.39209	87.1475	-53.585	105.455852	-0.12915	0.12353	0.074951	-1.82	54.607	60.588	-0.058594	-0.13349	-0.027148
1.956	-66.158	165.655	1406.078	-1.4629	0.91016	-0.13281	-42.8578	-41.347	1041.7798	-1.1534	0.47315	-0.14248	4.189	-18.375	22.26975	-0.027344	-0.089355	-0.071777	-38.678	41.206	22.0215	-0.014267	-0.075761	-0.12276	-109.549	81.713	1326.658	-1.5773	1.0243	-0.36904	43.1901	-21.923	103.5859	-0.1709	0.14355	0.066406	5.693	36.933	28.8264	-0.043457	-0.13184	-0.020508
1.958	-36.286	102.318	1391.5111	-1.4229	0.9043	-0.13281	-25.8376	-76.697	1126.388	-1.3632	0.56552	-0.14502	-44.7957	33.808	10.216	-0.032715	-0.088623	-0.069092	-75.799	33.2947	32.0702	-0.028721	-0.051549	-0.12901	-113.765	116.425	1283.8449	-1.5371	0.99651	-0.35508	24.208	-57.7828	174.292	-0.23438	0.1665	0.041016	10.575	13.8139	34.743	-0.033496	-0.14004	-0.019434
1.96	3.097	104.623	1405.896	-1.4092	0.89648	-0.13525	15.006	-107.434	1176.347	-1.5847	0.67295	-0.14736	-69.5509	39.1397	14.6127	-0.027832	-0.080566	-0.06543	-43.083	-19.6095	56.153	-0.041507	-0.030559	-0.1377	-113.279	102.003	1247.704	-1.48	0.96924	-0.33838	-12.425	-61.916	219.0107	-0.27344	0.18311	0.029297	38.1004	46.23	17.624	-0.028614	-0.13916	-0.017969
1.962	13.238	122.252	1363.431	-1.3755	0.87939	-0.12793	35.23	-104.1205	1147.334	-1.8015	0.78604	-0.14785	-28.099	35.049	34.0013	-0.022949	-0.084961	-0.064453	-82.054	31.9744	23.4137	-0.050293	-0.0083008	-0.14014	-60.002	107.45	1235.308	-1.4252	0.9377	-0.32441	-89.7397	-43.2465	249.77	-0.35449	0.21631	0.0029297	37.923	-3.0602	14.843	-0.02627	-0.13487	-0.024609
1.964	32.683	82.1501	1345.1524	-1.3474	0.87232	-0.13183	103.935	-166.133	1148.967	-1.9917	0.89111	-0.13135	-78.7902	80.034	0.9573	-0.024902	-0.084961	-0.05957	-99.861	0.221	19.9366	-0.053906	0.0083954	-0.14492	-77.5616	158.0943	1210.153	-1.3715	0.91211	-0.31074	4.439	-22.2861	395.233	-0.43823	0.25318	-0.0014649	58.34	28.79642	42.204	-0.019043	-0.14111	-0.03291
1.966	17.236	116.766	1318.501	-1.3218	0.8667	-0.1333	126.3467	-137.471	1134.067	-2.1394	0.98671	-0.10137	-36.7406	33.3772	0.3892	-0.029785	-0.079102	-0.054199	-74.0082	-9.7107	38.507	-0.060448	0.022067	-0.15097	-19.032	138.3652	1206.092	-1.32	0.87851	-0.29473	-38.753	27.3334	548.334	-0.53467	0.28613	-0.0053711	54.9266	51.21	30.4066	-0.0087891	-0.13916	-0.040039
1.968	6.508	66.1674	1300.61681	-1.293	0.84961	-0.12939	98.4341	-151.095	1116.9991	-2.2429	1.0684	-0.073535	-32.8689	32.638	9.318	-0.037598	-0.07959	-0.049316	-74.1902	43.7552	43.8845	-0.064746	0.041207	-0.15176	-0.605000000000004	179.391	1183.383	-1.2759	0.84619	-0.28037	-85.1897	19.813	722.3162	-0.70068	0.34033	-0.022949	39.442	7.3192	31.691	-0.0018555	-0.14131	-0.045117
1.97	39.663	45.278	1296.794	-1.271	0.84229	-0.13135	183.084	-179.925	1089.06	-2.2757	1.1449	-0.055176	-98.635	20.411	0.157	-0.044922	-0.071289	-0.044434	-48.771	-7.7218	38.41	-0.068066	0.049218	-0.1539	-17.66	197.736	1145.034	-1.2324	0.80859	-0.26855	-40.788	-6.27802	800.561	-0.80029	0.37744	-0.028809	49.6398	40.938	59.181	0.0030274	-0.14112	-0.051269
1.972	16.264	100.3561	1250.1525	-1.2437	0.82568	-0.13037	170.775	-154.362	1036.381	-2.2335	1.204	-0.04541	-40.123	-19.3513	37.0331	-0.059082	-0.063965	-0.042969	-53.8901	27.9313	34.681	-0.072754	0.057129	-0.16309	39.393	169.975	1131.107	-1.186	0.77764	-0.25147	-39.8135	-2.015	814.992	-1	0.44922	-0.033203	14.85	11.59125	38.6167	0.0022461	-0.14541	-0.056738
1.974	-27.482	82.2913	1240.7734	-1.2263	0.81177	-0.12964	151.619	-151.2289	1031.982	-2.1167	1.2271	-0.039063	-51.6855	30.9283	13.991	-0.063965	-0.060547	-0.044922	-48.7162	10.3481	56.6081	-0.078223	0.066309	-0.175	34.423	220.064	1092.2588	-1.144	0.74658	-0.23877	-64.161	-32.8188	916.142	-1.1612	0.51514	-0.038086	14.17	-3.4033	39.404	0.00078126	-0.14336	-0.061426
1.976	-16.945	134.029	1250.9868	-1.2051	0.79395	-0.12988	174.843	-73.382	1016.221	-1.9387	1.1875	-0.0375	-50.77443	30.952	19.073	-0.071777	-0.052734	-0.044922	-28.648	-71.8359	101.4887	-0.090724	0.078125	-0.18018	26.132	182.256	1040.0107	-1.1031	0.7126	-0.21963	-72.004	-17.108	1010.609	-1.3335	0.59424	-0.041016	21.234	28.403	39.3936	-0.0083008	-0.1377	-0.069824
1.978	-25.059	159.616	1209.3861	-1.1758	0.7666	-0.12988	129.747	17.867	1003.597	-1.7452	1.1183	-0.038867	6.237	25.0464	40.619	-0.071045	-0.042968	-0.043701	-51.318	-6.0722	90.976	-0.11104	0.092579	-0.17861	80.379	156.175	1030.1949	-1.0685	0.68418	-0.20742	-110.534	-14.786	1034.538	-1.5605	0.70703	-0.04541	-15.972	-7.2291	18.7899	-0.014063	-0.12646	-0.07539
1.98	-47.63	109.556	1176.801	-1.1504	0.75684	-0.12354	119.83	-4.06	1008.0098	-1.5573	1.0272	-0.041602	-43.2443	73.542	16.8072	-0.062988	-0.037598	-0.041504	2.614	-21.1181	134.799	-0.14258	0.10948	-0.18789	30.339	173.916	985.879	-1.0347	0.65869	-0.19531	-58.0552	-66.0153	1001.246	-1.6616	0.77002	-0.050293	-38.192	-3.0974	38.1123	-0.025195	-0.12119	-0.082031
1.982	-20.153	156.1065	1137.566	-1.1172	0.72852	-0.125	42.755	-7.92999999999999	997.147	-1.3972	0.93086	-0.036133	-14.696	44.674	32.4636	-0.049316	-0.033691	-0.050293	31.424	2.391	223.041	-0.18701	0.12598	-0.20068	33.113	114.978	969.3291	-1.0006	0.63261	-0.17988	-53.8	-85.427	964.2202	-1.8413	0.91455	-0.040527	-17.632	13.078	16.6505	-0.03457	-0.10557	-0.095703
1.984	-39.214	131.297	1106.0022	-1.0815	0.70654	-0.12646	-25.5978	-47.259	984.559	-1.2769	0.84424	-0.022461	8.635	42.519	23.8503	-0.032715	-0.038086	-0.052246	6.7429	55.459	321.745	-0.24853	0.14346	-0.21504	24.478	142.45733	959.169	-0.96787	0.60713	-0.16924	-40.311	-121.476	965.0451	-1.9575	1.0268	-0.028809	-59.5653	-5.4938	21.2264	-0.041504	-0.09248	-0.10693
1.986	-66.396	134.696	1089.7937	-1.0522	0.68994	-0.12646	10.038	-134.49	971.491	-1.2039	0.79258	0.0059572	-11.165	36.6448	27.13672	-0.0024414	-0.039063	-0.056641	65.955	4.4921	443.17	-0.31992	0.16523	-0.23174	-4.892	173.31817	910.6569	-0.93702	0.58369	-0.15362	51.612	-147.6249	1010.3552	-2.0391	1.1367	-0.019531	-40.515	38.8441	41.1863	-0.044922	-0.075195	-0.11816
1.988	-71.7055	210.5918	1042.125	-1.0112	0.65869	-0.125	13.774	-157.944	967.939	-1.1644	0.78096	0.038867	28.538	-28.751	46.8775	0.016113	-0.048828	-0.060547	98.22	65.396	546.908	-0.41328	0.20352	-0.2376	4.847	146.032	912.271	-0.90381	0.56446	-0.13984	13.009	-124.665	960.8648	-2.0933	1.2681	-0.0078125	-59.983	22.1644	17.564	-0.044531	-0.06211	-0.12402
1.99	-61.9206	173.0159	1019.527	-0.99219	0.64648	-0.12695	-4.282	-212.772	1014.54652	-1.1433	0.78409	0.056836	3.221	-1.20511	33.416	0.037109	-0.061523	-0.071289	68.119	89.304	689.71	-0.5335	0.24658	-0.24511	-26.726	204.88	877.832	-0.8667	0.5415	-0.12793	41.967	-171.732	940.6795	-2.0894	1.314	-0.0043945	-110.656	3.849	27.488	-0.039551	-0.045996	-0.13164
1.992	-47.4795	198.9654	993.01	-0.94043	0.61914	-0.12695	6.791	-250.503	1052.0017	-1.1159	0.79326	0.083106	16.123	11.1516	14.2785	0.057617	-0.067871	-0.075684	80.135	34.2	861.1796	-0.68506	0.29932	-0.24854	-67.567	179.941	832.842	-0.83086	0.52227	-0.11582	80.899	-131.9046	937.0999	-2.0151	1.3481	0.0043945	-88.62	29.1682	25.4281	-0.033692	-0.035449	-0.13672
1.994	-82.323	194.3447	946.368	-0.90087	0.59619	-0.12964	-18.519359	-263.651	1055.436	-1.0815	0.80078	0.11084	37.04825	21.6911	27.603	0.068848	-0.075684	-0.082031	32.885	52.275	949.6403	-0.86904	0.35791	-0.2333	-34.888	156.054	808.707	-0.78906	0.49785	-0.10361	58.355	-73.759	941.7687	-1.9187	1.3362	0.0031738	-114.272	-15.8098	12.3191	-0.029395	-0.020117	-0.14258
1.996	-117.894	153.4402	938.8917	-0.86084	0.57275	-0.13037	-37.483	-316.291	1085.714	-1.0403	0.80723	0.1292	6.383	69.31	21.2983	0.07373	-0.084473	-0.07959	30.799	-26.383	1033.0637	-1.0836	0.43535	-0.2211	-80.5553	209.6728	756.24732	-0.74336	0.47871	-0.090722	146.74	-26.961	967.311	-1.8008	1.3047	0.01416	-101.6091	-11.7891	37.6534	-0.023926	-0.01123	-0.14697
1.998	-111.744	209.349	902.559	-0.79639	0.5415	-0.13672	-40.7016	-322.334	1148.042	-1.0047	0.81133	0.14151	20.59	14.1757	32.656	0.075195	-0.09668	-0.083496	13.332	-44.269	1106.662	-1.3324	0.53496	-0.18359	-105.445	160.428	730.26	-0.69619	0.45186	-0.075489	125.979	21.96	941.5874	-1.6382	1.2466	0.028809	-79.5822	8.5662	11.67	-0.021582	-0.0048828	-0.15283
2	-103.478	184.3141	896.1357	-0.7666	0.52344	-0.13867	-97.493	-294.682	1202.1456	-0.97773	0.80235	0.14189	25.362	11.08889	20.7571	0.06543	-0.10059	-0.084961	-31.934	-13.542	1170.885	-1.6218	0.6501	-0.14053	-113.2268	195.1361659	699.39715	-0.64697	0.42871	-0.065918	45.1973	-23.255	938.5473	-1.5742	1.2227	0.04248	-89.929	-17.6145	30.253	-0.022168	0.0041993	-0.15879
2.002	-73.3413	181.35	883.703	-0.70068	0.48926	-0.14111	-64.64128	-254.461	1261.228	-0.96318	0.78232	0.11611	-5.554	25.5023	2.514	0.054688	-0.097168	-0.087891	-52.194	-90.515	1233.281	-1.9395	0.77539	-0.10449	-141.455	205.2187	623.191	-0.59844	0.39961	-0.051855	50.4983	-91.834	944.0514	-1.4746	1.1758	0.064453	-50.5681	2.2896	59.993	-0.02334	0.0077149	-0.16855
2.004	-32.931	202.28276	844.4438	-0.64965	0.45874	-0.14844	-87.224	-156.675	1270.433	-0.96387	0.75977	0.074707	20.157	-34.198	42.8875	0.050781	-0.098633	-0.085938	-89.843	-95.857	1237.429	-2.2582	0.92187	-0.087012	-134.927	143.596	621.6816	-0.54795	0.37412	-0.0375	15.552	-146.6761	902.654	-1.4231	1.1497	0.083008	-68.20716	-18.05	55.031	-0.033008	0.025391	-0.16943
2.006	-36.376	158.495	825.8568	-0.60352	0.42578	-0.14209	-131.216	-163.553	1296.049	-0.9624	0.73701	0.025	-26.977	6.5014	38.8442	0.029785	-0.089355	-0.088379	-164.538	-122.205	1220.285	-2.5266	1.0786	-0.061719	-158.203	211.749	560.082	-0.49443	0.35029	-0.022266	58.426	-237.096	924.671	-1.3833	1.1333	0.095215	-35.516	-30.3227	103.4861	-0.057617	0.03418	-0.16455
2.008	-9.319	190.002	793.2098	-0.54004	0.38379	-0.15723	-89.653	-163.681	1315.2011	-0.97217	0.71885	-0.019531	-24.979	-2.6613	29.293	0.020508	-0.077636	-0.083985	-162.413	-187.745	1229.566	-2.7375	1.2637	-0.025781	-149.498	184.6651	512.022	-0.44492	0.32246	-0.0065429	121.0065	-229.0699	923.7135	-1.3335	1.1235	0.10107	18.294	2.21	176.1827	-0.091407	0.051367	-0.16689
2.01	19.7647	210.169	733.022	-0.50635	0.35596	-0.15967	-86.179	-133.998	1303.7871	-0.9917	0.70791	-0.056641	8.831	-7.5006	19.4977	0.013184	-0.068359	-0.091309	-189.837	-135.975	1199.064	-2.8649	1.4832	0.0028321	-109.4	173.8031	512.419	-0.39648	0.29639	0.0092773	74.5481	-232.5125	916.9004	-1.3027	1.123	0.09668	-8.718	-22.352	237.7883	-0.14209	0.065137	-0.17275
2.012	41.1566	184.515	703.6675	-0.44824	0.30957	-0.15967	-27.6592	-148.525	1366.9252	-1.0275	0.70781	-0.090234	-74.993	45.875	-4.0722	0.0024414	-0.049316	-0.092773	-163.495	-148.016	1160.885	-2.9116	1.7114	0.01416	-139.089	236.481	462.59	-0.35332	0.26709	0.022949	87.352	-257.4695	952.125	-1.2202	1.1099	0.093262	21.9262	-5.224	338.293	-0.20341	0.07998	-0.17862
2.014	73.4902	220.69595	656.5333	-0.41284	0.27344	-0.16528	11.518	-108.066	1391.83	-1.0796	0.71338	-0.1167	-40.466	1.838	31.052	0.0019531	-0.040527	-0.091797	-145.4466	-112.5073	1115.8514	-2.8457	1.8508	-0.009961	-103.156	176.5391	462.9432	-0.30966	0.23926	0.036133	45.0325	-250.206	971.782	-1.1426	1.1001	0.08789	84.752	39.793	421.052	-0.27871	0.10117	-0.17871
2.016	30.8662	176.4708	611.21	-0.37842	0.23926	-0.1665	-15.821	-99.225	1397.545	-1.1369	0.73242	-0.13945	-36.407	15.9268	26.7513	-0.0039063	-0.023926	-0.091797	-188.406	-33.084	1094.53	-2.6761	1.8712	-0.082911	-66.0544	197.706	448.194	-0.27802	0.21661	0.048242	-8.789	-269.292	1039.094	-1.0703	1.0811	0.081055	75.018	33.1082	547.336	-0.37207	0.13672	-0.17676
2.018	35.845	174.4348	594.0552	-0.33936	0.19678	-0.17285	55.4626	-119.9063	1421.74	-1.1953	0.75508	-0.15235	-78.9213	33.507	3.4102	-0.0058594	-0.016602	-0.093506	-165.436	-33.185	1105.8834	-2.385	1.7669	-0.15908	-75.39555	204.418	412.0106	-0.24179	0.19268	0.06123	23.189	-250.303	1133.6679	-0.98242	1.0586	0.078125	96.607	67.397	727.091	-0.49785	0.17968	-0.17403
2.02	54.4855	225.589	555.9051	-0.31885	0.17578	-0.17285	57.738	-100.5652	1424.8282	-1.2508	0.78008	-0.14883	-15.716	-22.5991	11.07725	-0.010742	-0.0097656	-0.10156	-172.969	23.904	1098.1604	-2.0287	1.5646	-0.22851	-21.254	143.267	421.404	-0.2085	0.17578	0.069824	-51.4786	-219.007	1175.506	-0.94141	1.0352	0.064453	67.579	45.424	796.886	-0.65429	0.23584	-0.17685
2.022	30.1576	206.754	544.905	-0.28613	0.14111	-0.17529	42.436	-145.707	1474.551	-1.3179	0.81885	-0.13838	-48.7118	8.2606	4.288	-0.0078125	-0.0063477	-0.10205	-219.981	14.069	1077.06128	-1.6895	1.3262	-0.26953	-24.82	205.563	386.2749	-0.18486	0.16221	0.08164	-86.1266	-207.1132	1241.409	-0.87793	0.99805	0.057129	43.522	-0.675999999999998	900.95	-0.83828	0.30381	-0.17647
2.024	53.3021	245.007	527.877	-0.26367	0.11303	-0.18042	117.728	-171.335	1518.845	-1.3984	0.86914	-0.13281	-64.6527	-14.6502	16.27481	-0.01416	-0.003418	-0.10693	-170.706	-57.865	1058.53075	-1.4256	1.1184	-0.29492	4.21	175.3321	342.67839	-0.15859	0.15449	0.085645	-117.839	-136.536	1219.055	-0.84424	0.96972	0.043457	42.958	5.336	987.723	-1.04	0.38769	-0.16992
2.026	48.1678	240.99	467.98	-0.23584	0.093262	-0.18359	43.1231	-168.145	1533.786	-1.4866	0.93154	-0.1375	-20.854	-11.2242	23.2539	-0.0092773	-0.00097656	-0.1123	-185.705	-39.09	1040.355	-1.2353	0.9582	-0.30284	48.1975	137.3072	332.51213	-0.13906	0.14394	0.092676	-168.351	-98.668	1176.212	-0.82275	0.94385	0.023438	-19.906	-24.428	1045.649	-1.2715	0.49023	-0.14648
2.028	39.1189	199.381	426.428	-0.20557	0.060547	-0.17432	56.9645	-191.641	1558.948	-1.5753	1.0071	-0.14199	-72.214	65.205	-9.7508	-0.0065918	-0.0039063	-0.1167	-155.616	-106.375	1057.546	-1.1162	0.85391	-0.3083	18.392	177.459	299.3949	-0.12002	0.13916	0.096876	-111.922	-97.235	1205.963	-0.81006	0.90869	-0.0087891	-28.1	-26.84	1133.858	-1.5295	0.61465	-0.12227
2.03	57.6886	223.471	404.506	-0.18896	0.057129	-0.17188	99.088	-170.743	1566.609	-1.6722	1.0853	-0.1459	-50.6811	19.699222	18.1796	-0.00048828	-0.0063477	-0.12207	-95.6506	-148.539	1085.604	-1.035	0.80332	-0.33125	53.525	104.1451	304.1554	-0.10449	0.1377	0.10254	-68.373	-86.759	1232.713	-0.8125	0.89258	-0.019531	-43.653	-24.543	1110.154	-1.807	0.77461	-0.095703
2.032	23.479	173.8268	369.161	-0.15576	0.027344	-0.17822	70.914	-164.5598	1556.156	-1.7945	1.1695	-0.14736	-32.401	19.3898	27.62285	0	-0.014648	-0.12988	-93.523	-195.412	1105.115	-0.9624	0.78174	-0.36084	67.0869	137.596	288.3656	-0.087304	0.13604	0.1085	-89.357	-119.938	1284.82	-0.83789	0.8623	-0.058594	-145.589	-95.102	1106.685	-2.0762	0.95703	-0.077344
2.034	6.602	173.374	356.93	-0.13598	0.011475	-0.17798	91.509	-165.334	1566.265	-1.9297	1.252	-0.14404	-37.4736	34.4904	-13.7592	-0.0039063	-0.01416	-0.1377	-64.0833	-278.782	1119.6839	-0.87607	0.7585	-0.38662	42.7337	166.715	255.9278	-0.077344	0.13691	0.11787	-61.468	-136.4584	1336.687	-0.8728	0.84888	-0.071777	-174.005	-104.797	1151.295	-2.3234	1.1566	-0.066894
2.036	7.29	180.855	321.4768	-0.11523	-0.0068359	-0.1748	63.4942	-130.6071	1524.0033	-2.0724	1.3394	-0.13633	14.788	-28.402	27.256	-0.0063477	-0.016602	-0.14404	-49.875	-279.449	1142.274	-0.77676	0.74062	-0.40293	62.7051	104.7353	251.671	-0.070312	0.13965	0.1253	-86.096	-143.4535	1336.673	-0.91992	0.84375	-0.082031	-178.492	-116.918	1141.16	-2.5269	1.3755	-0.069824
2.038	-57.0492	134.61111	301.8704	-0.097168	-0.02832	-0.17822	39.9084	-124.564	1499.268	-2.2219	1.4203	-0.13135	4.68	5.6326	37.612	-0.030518	-0.011475	-0.15698	-34.911	-275.594	1202.261	-0.6705	0.71094	-0.42168	45.905	162.667	226.6597	-0.060352	0.14248	0.13105	-63.218	-194.143	1386.02	-0.98779	0.8501	-0.094238	-178.617	-124.376	1126.114	-2.657	1.6126	-0.063184
2.04	-57.4778	148.6836	305.8317	-0.088379	-0.039063	-0.17432	44.14256	-98.759	1494.665	-2.3648	1.5063	-0.11338	-19.573	-17.5472	85.9673	-0.060547	-0.00048828	-0.16211	66.769	-280.372	1281.442	-0.57315	0.67061	-0.4415	44.77	143.0087	193.09001	-0.061523	0.1499	0.14258	-9.486	-186.051	1424.368	-1.021	0.85596	-0.094727	-148.4806	-79.506	1088.043	-2.6995	1.8208	-0.049023
2.042	-37.035	157.157	269.1864	-0.079102	-0.062012	-0.17383	3.313	-58.0127	1490.0697	-2.4975	1.597	-0.10176	18.194	-13.6034	126.7459	-0.1377	0.013672	-0.17334	59.123	-211.777	1324.621	-0.49023	0.63281	-0.4541	40.832	115.4845	181.2498	-0.05791	0.1542	0.14707	-93.596	-178.492	1410.826	-1.0918	0.86523	-0.1084	-162.438	-83.509	1052.124	-2.6351	1.9321	-0.047851
2.044	-70.741	141.8291	243.6956	-0.075928	-0.075683	-0.1687	-9.624	-86.801	1495.5757	-2.6069	1.6802	-0.091309	22.719	72.01	158.26	-0.18506	0.021973	-0.17871	51.4301	-223.669	1347.05	-0.42803	0.58769	-0.45635	0.140000000000001	170.209	156.2879	-0.056446	0.15752	0.15469	-63.9796	-172.766	1448.87	-1.1621	0.87891	-0.13477	-174.585	-50.085	1088.413	-2.4616	1.9114	-0.097851
2.046	-47.1438	155.1993	218.4194	-0.074707	-0.091309	-0.16797	-30.99	-59.7994	1464.714	-2.6757	1.7321	-0.085058	50.6441	43.054	273.3395	-0.30078	0.053711	-0.18457	103.014	-207.5378	1368.921	-0.39834	0.54229	-0.45371	-17.306	79.6521	183.008	-0.052539	0.16573	0.1582	-27.618	-128.922	1467.9224	-1.2378	0.90869	-0.15479	-176.024	1.84099999999999	1055.4845	-2.3652	1.8047	-0.29395
2.048	-97.73	105.5258	201.5257	-0.072266	-0.1084	-0.16504	-106.949	-31.361	1458.591	-2.7065	1.763	-0.078613	33.0431	65.003	380.801	-0.40747	0.089114	-0.18335	61.597	-182.04369	1380.5511	-0.41357	0.51651	-0.43418	-32.992	110.134	159.5202	-0.050586	0.18233	0.1626	-33.9106	-148.5675	1515.641	-1.3843	0.96533	-0.19141	-206.334	-46.489	1031.1199	-2.0174	1.658	-0.35625
2.05	-90.573	89.594	199.027	-0.070313	-0.11865	-0.16357	-95.326	-25.717	1498.777	-2.6843	1.7603	-0.070801	61.614	90.685	460.698	-0.52881	0.13232	-0.18408	58.8651	-185.393	1413.601	-0.47705	0.50937	-0.40371	-58.1078	134.808	121.0579	-0.037109	0.18457	0.16699	44.06625	-138.834	1571.722	-1.478	1.0083	-0.20068	-173.272	-68.095	1037.0471	-1.6089	1.3973	-0.30976
2.052	-53.025	108.975	161.8993	-0.070313	-0.12842	-0.1709	-100.374	23.594	1496.691	-2.613	1.7284	-0.070117	123.542	36.3605	590.674	-0.71826	0.20166	-0.18652	80.22	-127.581	1412.9087	-0.59912	0.54004	-0.36621	-60.103	59.8118	114.9428	-0.025683	0.19033	0.16865	68.7826	-126.238	1528.349	-1.7212	1.1313	-0.19531	-189.825	-85.132	1002.459	-1.3234	1.1501	-0.29844
2.054	-76.807	84.829	142.875	-0.067139	-0.13721	-0.16797	-145.297	3.605	1491.893	-2.5137	1.6758	-0.066406	72.432	74.167	709.45	-0.82568	0.25	-0.18604	78.092	-104.01	1399.288	-0.78369	0.61065	-0.34453	-97.259	102.5437	88.9767	-0.01875	0.19395	0.16953	80.8313	-152.465	1510.708	-1.9414	1.2539	-0.18701	-185.106	-128.0063	1011.117	-1.1496	0.99511	-0.33945
2.056	-32.08	98.2566	126.388	-0.064453	-0.14111	-0.16064	-105.0346	-21.778	1502.432	-2.3932	1.61	-0.071485	49.841	29.7107	841.0988	-1.0625	0.36719	-0.17236	88.358	-124.312	1410.154	-0.99132	0.70381	-0.32637	-131.005	39.826	73.1813	-0.0019534	0.19903	0.16992	101.81	-116.72	1491.744	-2.1772	1.397	-0.17871	-112.456	-115.787	1013.703	-1.0259	0.90674	-0.37061
2.058	-51.0141	95.4251	97.9679	-0.056152	-0.14697	-0.16211	-143.871	-34.2981	1472.501	-2.2661	1.5316	-0.07334	39.96588	-26.624	940.5593	-1.2583	0.48218	-0.15918	22.8537	-93.476	1422.019	-1.1901	0.81513	-0.30527	-96.4383	0.960000000000001	76.96	0.012597	0.19297	0.16875	60.7048	-107.6865	1469.4549	-2.4609	1.6016	-0.17627	-96.607	-187.5174	1018.599	-0.94385	0.85947	-0.42432
2.06	-62.9527	74.696	78.3205	-0.056152	-0.14355	-0.15869	-128.46	-82.187	1486.4063	-2.1457	1.4567	-0.070996	-23.968	13.395	1004.37195	-1.4707	0.59766	-0.14111	-3.863	-109.433	1461.69708	-1.3857	0.93389	-0.29209	-129.536	60.115	44.326	0.022949	0.18896	0.16895	94.6888	-95.7239	1498.658	-2.5801	1.7031	-0.16602	-64.739	-250.269	1070.42992	-0.8752	0.81875	-0.46719
2.062	7.458	97.4534	66.801	-0.051758	-0.14063	-0.1582	-89.6815	-54.297	1498.601	-2.0409	1.3872	-0.075293	-0.686	-22.14	1083.47	-1.7769	0.77588	-0.11865	14.429	-120.59	1502.355	-1.5547	1.0566	-0.29297	-100.65	-20.829	67.8058	0.038477	0.17949	0.17158	86.458	-55.1452	1470.0137	-2.7378	1.8774	-0.14502	-23.5929	-265.136	1094.253	-0.80723	0.76875	-0.48828
2.064	0.255000000000003	51.306	59.273	-0.056397	-0.13867	-0.15527	-130.777	-40.5821	1487.627	-1.9507	1.3208	-0.071777	-52.267	-10.06	1130.399	-1.9199	0.86719	-0.11328	-43.4258	-123.7973	1536.8	-1.7001	1.1652	-0.32764	-102.3776	26.4749	67.05851	0.04668	0.16768	0.17187	9.153	-78.727	1465.92	-2.7351	1.9582	-0.11621	-20.834	-311.867	1149.491	-0.73604	0.71592	-0.49561
2.066	17.893	26.4781	75.882	-0.0625	-0.13281	-0.15039	-54.339	-47.5625	1498.767	-1.8673	1.2749	-0.07373	-133.614	-11.4456	1151.22	-2.189	1.0542	-0.089844	-47.1779	-161.19	1556.284	-1.8058	1.2492	-0.37656	-109.211	63.0704	25.87	0.055274	0.15127	0.17149	13.571	-63.5195	1485.876	-2.5815	1.9868	-0.021973	60.1829	-287.63	1220.615	-0.66553	0.65576	-0.50391
2.068	36.0591	25.0976	62.259	-0.06543	-0.12842	-0.14014	-49.897	-2.066	1478.2232	-1.7952	1.2313	-0.069726	-102.125	-104.04	1146.323	-2.3466	1.2051	-0.070557	-64.7528	-146.286	1560.419	-1.8844	1.2972	-0.4168	-67.8324	25.0397	29.6783	0.065137	0.13682	0.17305	-19.044	-38.499	1467.897	-2.7319	1.9692	-0.22412	100.7893	-243.3488	1239.7079	-0.59697	0.58877	-0.51006
2.07	3.582	15.9838	40.2405	-0.068848	-0.12207	-0.14111	-74.5788	1.932	1457.2966	-1.7385	1.1911	-0.06582	-183.991	-113.922	1129.485	-2.4644	1.3677	-0.04541	-95.909	-133.663	1541.0662	-1.9496	1.3345	-0.43164	-69.7683	80.48	16.213	0.065918	0.11523	0.17383	-49.067	-42.974	1503.97	-2.6875	1.998	-0.27344	90.393	-243.8555	1270.757	-0.52764	0.52588	-0.5085
2.072	31.575	35.5356	57.6	-0.083984	-0.11475	-0.1333	-16.85	37.258	1474.7993	-1.6926	1.1518	-0.061133	-217.7065	-152.215	1122.138	-2.5347	1.5806	-0.035156	-68.616	-143.907	1567.06	-2.0288	1.3677	-0.42969	-66.3652	25.9895	30.7529	0.071583	0.098246	0.1709	-41.89	-18.374	1530.437	-2.4512	1.9297	-0.19629	129.855	-172.19	1301.713	-0.4753	0.47197	-0.49052
2.074	37.147	27.769	40.7541	-0.092285	-0.10669	-0.12305	-40.352	91.357	1445.2283	-1.6577	1.1235	-0.057617	-152.376	-151.393	1105.554	-2.5115	1.6672	-0.064941	-98.535	-98.977	1586.275	-2.1389	1.4162	-0.42929	-28.369	-21.598	41.572	0.07744	0.079496	0.1668	-112.3359	-44.275	1525.44626	-2.3133	1.801	-0.13012	115.885	-168.073	1314.2517	-0.44141	0.44815	-0.44707
2.076	24.604	-3.452	27.188	-0.10156	-0.088867	-0.11572	-10.746	77.647	1433.225	-1.6327	1.0895	-0.053906	-162.958	-74.449	1053.5906	-2.4019	1.6548	-0.1167	-93.797	-110.277	1582.146	-2.2551	1.4726	-0.4293	-12.738	44.4867	13.2565	0.081737	0.06231	0.17187	-113.9889	-82.543	1543.717	-2.2148	1.6973	-0.12061	98.373	-185.9095	1364.8815	-0.44678	0.43604	-0.40283
2.078	78.4555	13.9222	6.712	-0.11523	-0.070801	-0.10645	-1.569	104.902	1423.2501	-1.6069	1.0608	-0.045214	-148.86	-94.016	1027.55	-2.1226	1.4849	-0.21289	-53.646	-106.217	1560.2133	-2.3656	1.5325	-0.43906	5.676	-26.108	8.0373	0.081932	0.049319	0.16846	-129.771	-49.699	1501.517	-2.0776	1.5825	-0.12939	100.426	-156.236	1403.8261	-0.48994	0.44423	-0.3665
2.08	45.22356	-5.7733	-11.143	-0.11572	-0.061523	-0.104	-27.921	99.175	1383.9381	-1.5776	1.0331	-0.041699	-120.2754	-35.545	1022.2199	-1.9453	1.3613	-0.25684	-80.117	-73.9024	1523.753	-2.4489	1.5745	-0.46963	1.985	15.9689	23.2839	0.087402	0.029785	0.17236	-140.381	-53.3533	1487.371	-2.0073	1.5298	-0.12891	82.306	-190.2051	1411.1839	-0.57969	0.48067	-0.34199
2.082	35.184	-6.369	9.2487	-0.11816	-0.043457	-0.09375	32.876	67.387	1369.402	-1.5539	1.0062	-0.037207	-158.145	-18.084	1010.58	-1.6011	1.1235	-0.31689	-67.141	-85.413	1533.2323	-2.5	1.6035	-0.50195	15.075	43.96	12.5483	0.090919	0.016595	0.17041	-98.8456	-30.22	1506.74636	-1.8823	1.4204	-0.12207	105.9464	-168.694	1430.0596	-0.71016	0.53496	-0.32519
2.084	44.5703	12.0612	23.25583	-0.11768	-0.031005	-0.085449	31.763	102.008	1344.689	-1.5288	0.98096	-0.031738	-124.798	-59.559	1026.9186	-1.3886	0.97169	-0.35645	-8.22	-35.4996	1519.732	-2.5196	1.6327	-0.53496	59.372	-11.5281	17.25572	0.09727	-0.0021666	0.1707	-162.971	-15.385	1488.1314	-1.7905	1.3149	-0.11035	76.683	-116.46	1391.803	-0.86406	0.60508	-0.32617
2.086	-5.713	6.4742	-0.0266999999999999	-0.11328	-0.014648	-0.084473	18.523	103.8947	1329.216	-1.4993	0.95517	-0.027539	-130.425	-46.66	997.77	-1.2261	0.8501	-0.37354	-32.453	12.1811	1506.394	-2.4999	1.656	-0.56055	67.2704	56.921	3.2835	0.10157	-0.020134	0.16601	-155.891	-34.525	1497.6148	-1.7539	1.2676	-0.104	14.394	-127.215	1412.613	-1.0278	0.69189	-0.32568
2.088	13.277	35.495	11.9235	-0.096191	0.0024414	-0.078613	76.9688	97.2894	1347.9537	-1.4652	0.93056	-0.023535	-171.142	-108.753	985.128	-1.104	0.76611	-0.37061	13.4019	20.5734	1503.926	-2.437	1.6579	-0.57657	52.5049	11.434	17.0009	0.10576	-0.035366	0.16542	-111.746	0.586600000000001	1479.809	-1.6758	1.1953	-0.1001	12.511	-77.228	1476.0022	-1.1893	0.78594	-0.32246
2.09	-20.309	43.584	0.314	-0.080566	0.0092773	-0.084961	36.9355	106.6571	1298.866	-1.4355	0.904	-0.020801	-113.0931	-158.776	987.032	-1.0747	0.75537	-0.36865	35.521	57.796	1504.445	-2.3251	1.6378	-0.56924	61.6799	-25.0224	40.496	0.11621	-0.050781	0.15723	-153.65	16.9146	1459.2682	-1.6264	1.1499	-0.1062	-48.68016	-99.588	1484.33833	-1.3383	0.88906	-0.31523
2.092	-59.5472	31.771	13.4429	-0.056152	0.017578	-0.080566	32.494	45.088	1285.5251	-1.4082	0.88066	-0.011719	-125.82	-147.651	976.942	-1.0366	0.76611	-0.38281	27.5438	31.208	1531.862	-2.186	1.6001	-0.55713	55.1843	42.185	15.8837	0.12402	-0.072437	0.15644	-140.541	40.267	1476.164	-1.5718	1.106	-0.11377	-82.0674	-142.335	1548.946	-1.4774	0.99059	-0.33086
2.094	-35.011	54.557	21.4149	-0.025391	0.018555	-0.07959	13.177	61.235	1279.887	-1.3784	0.86084	-0.0048828	-85.5785	-221.238	1015.665	-1.0002	0.77172	-0.38159	88.958	28.82	1579.646	-2.1259	1.5304	-0.5958	52.573	-21.4681	16.8551	0.12945	-0.087435	0.15333	-128.6463	110.603	1458.0323	-1.5234	1.0605	-0.11279	-86.1802	-119.585	1553.4433	-1.5886	1.0677	-0.36377
2.096	-76.838	37.242	-2.64	-0.013672	0.02002	-0.077148	-37.536	69.765	1250.066	-1.3519	0.83916	0.00058594	-24.453	-237.759	1052.0635	-0.94141	0.76758	-0.37451	57.6125	62.921	1582.108	-2.0191	1.4673	-0.58897	11.174	29.2778	14.9297	0.14233	-0.10231	0.14866	-150.706	108.81	1427.681	-1.501	1.0352	-0.11133	-143.097	-155.167	1571.537	-1.6807	1.1211	-0.41602
2.098	-71.613	18.34	0.286999999999999	0.010254	0.013184	-0.080078	-40.382	60.789	1238.248	-1.3255	0.81709	0.0017578	-35.0118	-253.929	1055.755	-0.85156	0.73438	-0.375	88.425	40.36	1560.863	-1.9085	1.3559	-0.54013	3.564	62.311	13.3859	0.14979	-0.11645	0.14688	-94.4573	110.246	1424.219	-1.4727	0.99219	-0.10352	-118.447	-127.321	1597.899	-1.7589	1.14	-0.46475
2.1	-61.5925	14.036	-0.375	0.023438	0.0048828	-0.076171	-75.756	118.048	1199.6903	-1.2985	0.79248	0.0056641	16.194	-297.874	1109.1871	-0.80029	0.7085	-0.37744	131.332	38.2545	1556.60481	-1.8514	1.2494	-0.51074	-3.68	26.3406	31.3615	0.15771	-0.13135	0.14844	-80.803	100.518	1392.74	-1.4609	0.96387	-0.099123	-127.837	-74.2775	1559.048	-1.8391	1.1492	-0.50782
2.102	-106.165	-3.563	6.628	0.031738	-0.0053711	-0.078613	-84.493	107.5766	1171.9485	-1.2731	0.76914	0.010449	39.0861	-277.247	1151.666	-0.71289	0.64355	-0.37988	109.131	42.549	1549.008	-1.8242	1.1836	-0.51465	-38.569	93.513	22.5029	0.15877	-0.14197	0.14445	-48.764	55.526	1407.866	-1.4468	0.94092	-0.09082	-134.322	-118.241	1570.834	-1.9468	1.1742	-0.5375
2.104	-65.8751	36.519	21.78977	0.040527	-0.019043	-0.075195	-26.033	97.36864	1175.5446	-1.2456	0.74561	0.0097656	50.947	-293.817	1216.957	-0.6648	0.58374	-0.37939	136.968	17.431	1549.5718	-1.8012	1.1395	-0.51318	-47.14598	65.307	12.1334	0.16352	-0.15184	0.14577	28.821	82.2045	1394.552	-1.437	0.91162	-0.084961	-83.057	-68.6704	1567.1078	-2.0884	1.2187	-0.55908
2.106	-73.6943	47.4	27.77817	0.041016	-0.020996	-0.072754	-77.2006	145.58459	1153.3583	-1.2223	0.71719	0.0093749	90.16855	-265.066	1263.343	-0.63135	0.53369	-0.38037	121.365	28.705	1541.7495	-1.7855	1.1102	-0.50235	-63.3409	17.4743	27.9931	0.16202	-0.15527	0.14481	-20.033	86.12	1328.7689	-1.4277	0.90234	-0.081055	-120.125	-78.9091	1553.216	-2.2446	1.2915	-0.58154
2.108	-102.074	38.9969	29.773	0.043945	-0.025879	-0.076172	-78.799	126.386	1123.7148	-1.1995	0.68877	0.0052734	53.9515	-189.6648	1262.77355	-0.64404	0.49268	-0.37549	85.904	16.606	1520.536	-1.7809	1.0899	-0.48984	-88.522	59.0481	5.451	0.15934	-0.16028	0.14685	3.732	75.225	1320.317	-1.4175	0.88135	-0.071289	-102.347	-93.775	1589.6804	-2.394	1.3809	-0.60908
2.11	-38.597	40.934	46.903	0.037598	-0.031006	-0.075928	-59.6528	152.2156	1080.966	-1.171	0.66807	0.002539	68.335	-189.18238	1325.844	-0.67822	0.49658	-0.36865	70.342	8.711	1524.763	-1.7714	1.0786	-0.4749	-83.9986	-25.6324	6.569	0.15869	-0.15918	0.14893	42.771	94.7	1312.166	-1.4004	0.87475	-0.071533	-70.067	-26.5315	1587.866	-2.5284	1.4798	-0.62451
2.112	-82.035	28.707	19.44	0.032715	-0.029785	-0.074219	-110.957	171.6327	1017.702	-1.1446	0.64112	-0.0034179	66.028	-155.833	1363.334	-0.79883	0.53613	-0.33838	66.769	72.9031	1496.78	-1.7695	1.084	-0.4707	-101.6362	18.378	20.4968	0.14946	-0.15166	0.14789	31.787	87.0348	1298.0347	-1.3828	0.86914	-0.070313	-65.246	-40.954	1564.132	-2.6362	1.5845	-0.63232
2.114	-49.38035	28.1521	25.7755	0.033203	-0.025879	-0.080078	-61.79685	126.922	1005.502	-1.1133	0.62109	0	25.613	-129.171	1371.4222	-0.94043	0.60352	-0.33374	74.995	72.858	1487.119	-1.7467	1.0938	-0.46904	-117.769	53.224	6.692	0.14182	-0.14609	0.15071	45.826	103.382	1298.799	-1.3467	0.86523	-0.07373	-25.8691	-14.2358	1563.455	-2.6894	1.6957	-0.63105
2.116	-7.311	40.655	13.314	0.029297	-0.02002	-0.080078	-53.296	160.1867	987.405	-1.0837	0.60302	-0.0001953	66.8761	-149.616	1387.76114	-1.0933	0.69336	-0.31592	46.6581	126.269	1491.479	-1.7121	1.0953	-0.46465	-108.23	5.509	39.9467	0.13291	-0.13702	0.14971	-8.579	138.432	1277.2344	-1.3281	0.86328	-0.07666	8.0106	34.011	1540.06	-2.7539	1.7852	-0.66113
2.118	-43.1864	20.3912	33.9155	0.032227	-0.012207	-0.087891	-79.438	142.35	959.5611	-1.0523	0.58457	-0.0039063	40.026	-132.192	1401.105	-1.3047	0.82129	-0.29688	-31.1662	156.129	1451.0165	-1.6672	1.091	-0.46426	-105.422	73.308	45.93055	0.12035	-0.12501	0.15252	-6.841	124.651	1259.3284	-1.2925	0.84814	-0.074707	28.169	2.1055	1585.697	-2.7981	1.8667	-0.73525
2.12	-3.26900000000001	33.6487	33.4446	0.034424	-0.0031739	-0.093018	-36.4878	117.811	966.4632	-1.016	0.5584	-0.00625	11.459	-150.037	1426.435	-1.396	0.89404	-0.2915	-13.6749	119.1226	1437.5171	-1.6136	1.069	-0.4583	-98.813	39.0726	31.8752	0.10156	-0.1167	0.1499	23.166	138.991	1239.7294	-1.2613	0.83838	-0.078614	75.643	51.459	1616.152	-2.7246	1.9102	-0.75429
2.122	16.157	40.58	11.694	0.043457	-0.003418	-0.09668	-71.524	187.648	923.1448	-0.9751	0.53467	-0.0083984	25.163	-158.937	1444.6394	-1.5664	1.0469	-0.29688	-59.768	157.593	1394.3302	-1.5566	1.043	-0.45117	-74.46383	13.30781	50.2	0.083304	-0.1069	0.15271	-23.937	166.748	1189.121	-1.2349	0.81689	-0.075195	92.223	48.962	1614.978	-2.5726	1.8824	-0.71641
2.124	-6.518	40.792	19.961	0.057129	0.0024414	-0.10742	-30.73799	152.3265	935.494	-0.93652	0.51367	-0.010742	-52.5437	-116.155	1453.266	-1.6714	1.1568	-0.32031	-111.924	140.129	1370.7841	-1.5097	1.0143	-0.44052	-80.556	64.894	44.24683	0.057229	-0.09159	0.14705	-0.798999999999999	159.2067	1178.202	-1.1953	0.78809	-0.079102	111.164	5.17228	1634.375	-2.3961	1.807	-0.67285
2.126	62.55045	55.447	46.071	0.062012	0.0058594	-0.11279	16.147	194.411	922.0031	-0.89746	0.49043	-0.0083985	-51.3632	-139.278	1502.9212	-1.7559	1.2441	-0.34668	-35.806	122.2176	1377.3148	-1.4659	0.98252	-0.4293	-55.2132	-27.574	45.9805	0.031921	-0.076918	0.14759	8.558	173.7973	1158.354	-1.1753	0.7749	-0.074707	164.247	54.001	1598.076	-2.2202	1.6978	-0.6499
2.128	38.7426	33.9098	38.573	0.078613	0.0078125	-0.12207	12.072	206.797	854.1992	-0.85723	0.46514	-0.012891	-29.923	-125.511	1539.173	-1.8555	1.3379	-0.37109	-92.2945	145.0233	1325.965	-1.4284	0.95205	-0.42188	-36.24	3.9191	35.4586	0.0096236	-0.065306	0.14357	-66.3935	163.551	1126.1318	-1.1367	0.74023	-0.076172	148.463	11.3821	1579.119	-2.0733	1.5654	-0.63965
2.13	44.3568	9.7082	42.211	0.087647	0.0083007	-0.12036	60.296	138.5775	842.9641	-0.81152	0.43974	-0.014063	-107.519	-118.332	1555.105	-1.9058	1.3716	-0.37061	-96.188	95.84	1293.476	-1.3993	0.92227	-0.40664	-26.421	21.6949	22.2415	-0.0097656	-0.044922	0.13672	-44.1955	147.044	1128.6739	-1.1064	0.7129	-0.072754	149.074	23.7077	1612.362	-1.9534	1.424	-0.63349
2.132	66.4848	13.7747	31.643	0.09082	0.0058594	-0.13037	54.314	182.995	807.72467	-0.76709	0.41416	-0.018457	-110.079	-138.119	1590.961	-2.0332	1.4395	-0.37012	-98.332	111.7681	1283.674	-1.3711	0.89648	-0.39697	5.327	-13.9091	29.2175	-0.030837	-0.0294	0.13083	-66.5866	172.0261	1081.8693	-1.0737	0.68604	-0.074707	150.355	69.476	1595.514	-1.8671	1.3008	-0.61123
2.134	8.643	-11.4968	31.2978	0.093262	0.0087891	-0.1416	68.777	159.543	780.9551	-0.72803	0.3916	-0.024414	-104.779	-100.8315	1598.3151	-2.1511	1.49	-0.37867	-138.594	127.201	1253.667	-1.3402	0.88066	-0.3874	21.303	59.836	42.629	-0.047123	-0.012165	0.12903	-62.7955	147.983	1055.876	-1.0249	0.64307	-0.075195	111.683	-4.5466	1598.12	-1.811	1.1993	-0.5835
2.136	42.1142	-2.0347	63.297	0.092773	0.0087891	-0.14551	91.903	150.774	752.557	-0.68262	0.36758	-0.021289	-117.32	-114.1239	1621.291	-2.2832	1.543	-0.38477	-104.376	99.314	1256.347	-1.3094	0.86133	-0.3836	29.01	41.309	35.2594	-0.061788	0.0019195	0.12695	-72.30685	157.5979	1029.0226	-0.99756	0.62744	-0.074219	131.573	40.0183	1572.817	-1.7773	1.123	-0.5625
2.138	22.937	5.9297	32.7913	0.092285	0.0039063	-0.15234	79.588	218.0838	692.2776	-0.64287	0.34092	-0.030761	-78.894	-121.33	1635.836	-2.4473	1.6035	-0.42188	-98.188	141.1808	1230.0817	-1.2746	0.84922	-0.37617	36.486	24.4236	49.577	-0.07541	0.020297	0.12315	-144.393	178.6763	969.545	-0.95166	0.58447	-0.071289	89.17	22.741	1555.88	-1.7536	1.0833	-0.54229
2.14	-6.02200000000001	7.0911	21.1005	0.083496	0.0014648	-0.15625	92.711	172.53	669.62139	-0.60342	0.32568	-0.031543	-86.047	-74.8251	1613.20567	-2.5215	1.6348	-0.44727	-98.8647	138.559	1185.22	-1.2412	0.83301	-0.36514	45.5301	68.698	35.5474	-0.087891	0.037598	0.11572	-109.387	148.1272	974.6932012	-0.91455	0.55713	-0.071045	97.648	24.72	1547.218	-1.7256	1.0528	-0.52441
2.142	24.438	21.6057	31.536	0.071289	0.0014648	-0.16162	80.46	196.674	635.209	-0.56133	0.30058	-0.039844	-81.065	-84.129	1592.178	-2.644	1.7173	-0.49072	-47.509	135.525	1162.476	-1.2051	0.80859	-0.36279	50.7233	-26.239	39.089	-0.10202	0.058489	0.10728	-93.994	182.4776	954.2391	-0.87939	0.53174	-0.073242	71.911	103.7283	1508.3417	-1.708	1.0414	-0.51309
2.144	-36.706	11.49892	28.463	0.058594	0.0024414	-0.16211	32.98977	236.608	606.079	-0.51953	0.27148	-0.04541	-33.7775	-53.5523	1592.321	-2.6875	1.7724	-0.5166	-44.64	196.6119	1114.459	-1.1675	0.79287	-0.34746	54.996	-15.6025	55.16	-0.11373	0.079096	0.097721	-112.542	181.969	937.296	-0.83154	0.49658	-0.071777	6.9575	95.8336	1479.5368	-1.6859	1.0414	-0.50527
2.146	-22.889	-3.86	51.752	0.052246	0.0029297	-0.1626	51.5715	197.038	607.5701	-0.47695	0.24922	-0.052246	-71.974	-22.3342	1598.537	-2.6934	1.8125	-0.54492	-41.044	155.691	1101.482	-1.1265	0.77022	-0.33877	47.228	-14.344	53.7801	-0.12159	0.095086	0.0801	-37.6029	151.251	948.869	-0.80859	0.48242	-0.081055	-2.877	115.0131	1473.1271	-1.6543	1.0488	-0.5
2.148	-27.851	-1.064	26.9213	0.033203	0.010742	-0.16455	48.555	243.414	588.2259	-0.43193	0.22119	-0.061816	-8.9266	-52.037	1624.8037	-2.623	1.8145	-0.56543	-1.445	184.883	1110.287	-1.0952	0.74365	-0.33057	40.268	-72.6514	58.28739	-0.12916	0.11414	0.059153	-61.7554	195.6278	892.4797	-0.76465	0.4502	-0.075195	-29.948	129.141	1437.4585	-1.6194	1.0563	-0.49365
2.15	-84.142	-1.723	10.8571	0.021728	0.0097656	-0.16382	14.3577	206.053	558.2023	-0.38818	0.19385	-0.068457	43.164	-30.67	1615.117	-2.5605	1.7988	-0.5708	-1.722	209.813	1045.536846	-1.0604	0.71582	-0.32227	11.813	-13.977	71.347	-0.14209	0.13037	0.042969	-41.7213	176.869	842.0706	-0.73193	0.42481	-0.076904	-87.003	74.999	1414.476	-1.5836	1.0629	-0.48613
2.152	-37.999	3.489	26.071	0.0068359	0.015137	-0.16309	14.107	172.295	540.9331	-0.34873	0.16875	-0.069727	22.1102	-42.3294	1608.411	-2.3882	1.7397	-0.58105	29.109	169.051	1011.485	-1.0322	0.68945	-0.31836	26.582	-34.152	82.4922	-0.15095	0.15067	0.029415	23.257	184.04544	801.9396	-0.69727	0.40332	-0.076172	-83.16	109.1028	1397.958	-1.5461	1.0566	-0.47168
2.154	-65.5517	22.175	9.026	-0.019531	0.016113	-0.15869	-6.426	224.8	470.121	-0.31543	0.13916	-0.069824	68.279	-32.7318	1632.5009	-2.2646	1.6665	-0.58594	39.204	229.331	958.341	-1.0024	0.66211	-0.30762	-3.651	-56.314	129.507	-0.16887	0.16524	0.012176	-12.023	210.05893	743.567	-0.64844	0.37305	-0.079102	-96.384	118.6258	1352.6577	-1.5114	1.0472	-0.45361
2.156	-111.351	18.0672	13.8335	-0.026855	0.022461	-0.1665	-17.1262	163.3914	450.8724	-0.28428	0.11621	-0.075781	43.589	14.542	1640.5722	-2.1533	1.5781	-0.59277	38.357	212.506	937.2342	-0.97149	0.63985	-0.29766	-38.94	-17.769	165.7047	-0.19932	0.18314	0.00043797	23.073	152.527	725.6792	-0.62305	0.35449	-0.080566	-114.871	102.773	1326.778	-1.4766	1.0293	-0.4375
2.158	-53.128	27.872	19.9119	-0.049805	0.027832	-0.16113	-33.712	188.386	457.3551	-0.25566	0.091699	-0.07539	64.309	5.6964	1659.941	-2.0391	1.4648	-0.58789	44.144	182.5343	919.49779	-0.94102	0.61914	-0.28672	-81.0867	-97.401	209.298	-0.23865	0.1967	-0.018592	32.1002	162.2106	695.0648	-0.56445	0.31934	-0.078125	-103.902	146.6135	1282.306	-1.4421	1.0118	-0.42627
2.16	-102.922	18.7878	6.14735	-0.0625	0.035889	-0.16357	-94.438	197.7757	410.8462	-0.23262	0.070215	-0.077344	99.668	31.1357	1658.14	-1.9961	1.4121	-0.58203	1.798	217.645	853.043	-0.90479	0.59785	-0.27568	-94.1768	-44.099	299.23	-0.28955	0.21045	-0.038574	-4.012	157.7285	646.155	-0.52075	0.29468	-0.07959	-155.435	111.763	1248.89	-1.4073	0.98135	-0.41162
2.162	-86.101	0.375999999999998	22.475	-0.080078	0.040039	-0.17285	-73.1779	129.896	398.9016	-0.20889	0.050488	-0.07334	90.69	34.608	1647.9479	-1.9312	1.3442	-0.56299	15.463	154.746	841.8249	-0.86865	0.57666	-0.26758	-92.6018	7.2205	414.548	-0.35317	0.22771	-0.063849	49.1889	142.4357	657.3771	-0.47461	0.2666	-0.085938	-99.946	111.067	1256.079	-1.362	0.94854	-0.39443
2.164	-39.0901	1.203	4.615	-0.095215	0.043457	-0.18457	-56.0886	185.5698	353.8463	-0.18945	0.026855	-0.07666	127.297	-15.5261	1660.539	-1.903	1.3069	-0.54443	18.114	181.368	849.163	-0.82588	0.55762	-0.25557	-105.6444	-5.584	552.855	-0.43262	0.25398	-0.08739	39.648	212.565	621.59363	-0.41699	0.23486	-0.082031	-78.1331	154.9463	1215.185	-1.3143	0.91719	-0.38223
2.166	-87.8638	-17.077	-13.0957	-0.10156	0.046387	-0.19092	-95.723	161.1413	328.1646	-0.167	0.0085937	-0.075098	113.073	0.125	1644.066	-1.8706	1.2798	-0.52588	-13.078	230.24	811.264	-0.78154	0.53623	-0.24609	-127.1991	62.2274	669.125	-0.52833	0.28483	-0.10301	54.4986	189.494	592.662	-0.38477	0.2168	-0.08252	-129.834	127.748	1203.42111	-1.2671	0.88135	-0.36572
2.168	-23.932	-13.5112	41.22	-0.11523	0.053711	-0.19238	-70.7791	136.42876	333.679	-0.14688	-0.0081055	-0.075098	89.993	-4.3613	1625.906	-1.8389	1.248	-0.50635	-9.41	201.1715	801.611	-0.73349	0.51397	-0.23711	-127.04	20.0647	714.362	-0.64896	0.3285	-0.11513	73.7423	191.763	538.7821	-0.33447	0.17773	-0.085938	-63.5119	176.3386	1182.3281	-1.2128	0.84854	-0.35362
2.17	-22.677	-11.6415	41.385	-0.1438	0.069335	-0.1941	-83.979	183.204	304.1866	-0.13008	-0.020996	-0.069629	118.603	-22.0541	1627.306	-1.8203	1.2441	-0.49658	-36.933	256.432	764.52	-0.6836	0.48125	-0.2249	-99.439	-32.847	815.94	-0.79346	0.37549	-0.13184	53.2637	212.93	472.173	-0.29785	0.14892	-0.081299	-40.5	186.633	1140.895	-1.1667	0.81924	-0.34014
2.172	-44.5957	-27.1619	81.1197	-0.18018	0.080566	-0.1958	-65.171	113.7891	293.294	-0.11641	-0.037109	-0.069629	68.519	16.8433	1577.0075	-1.7822	1.2285	-0.47266	-67.2135	216.8131	721.142	-0.62939	0.45459	-0.21631	-92.946	14.94	932.008	-0.95639	0.4423	-0.14561	67.744	157.3508	456.862	-0.26416	0.11719	-0.083984	-41.672	179.0516	1131.5078	-1.1226	0.78916	-0.32256
2.174	21.054	-0.962	120.5909	-0.25732	0.088867	-0.20068	-52.6751	128.7298	272.1025	-0.10059	-0.051758	-0.067871	49.782	14.446	1574.7846	-1.7547	1.221	-0.46167	-56.836	172.133	724.124	-0.57822	0.42529	-0.20195	-108.274	-35.972	984.889	-1.1328	0.51965	-0.14736	60.816	189.2018	451.0433	-0.21631	0.078613	-0.087402	13.78	214.115	1100.8046	-1.082	0.76289	-0.30518
2.176	11.401	29.49637	163.948	-0.30566	0.09668	-0.20508	-76.999	147.9765	238.1137	-0.091406	-0.057226	-0.065723	56.6014	53.786	1584.2547	-1.7188	1.209	-0.44971	-87.2351	229.6962	663.1602	-0.52793	0.39453	-0.18848	-69.637	-36.94	999.096	-1.3245	0.59972	-0.14267	50.6581	189.022	419.7501	-0.19092	0.057129	-0.083496	18.591	184.7036	1072.6902	-1.0503	0.73877	-0.29004
2.178	41.4595	43.243	290.5538	-0.4375	0.11475	-0.19922	-13.304	86.132	222.77	-0.082324	-0.064453	-0.06543	16.2156	107.556	1560.1204	-1.6772	1.189	-0.43701	-106.288	165.835	618.2216	-0.47754	0.3625	-0.17754	-39.243	-68.9044	940.4455	-1.5237	0.69865	-0.13427	42.3476	139.083	400.1212	-0.15186	0.023438	-0.083008	48.6112	191.287	1038.9102	-1.0105	0.70537	-0.27051
2.18	50.566	55.521	383.264	-0.56763	0.13819	-0.18628	-8.391	153.399	178.7429	-0.078418	-0.070703	-0.063477	17.8176	99.4479	1562.026	-1.6504	1.1768	-0.42578	-99.0332	179.8827	612.5841	-0.43154	0.3335	-0.16201	-15.326	-148.107	953.0288	-1.7148	0.80664	-0.12256	-27.689	187.949	352.042	-0.12549	-0.0029296	-0.084473	53.2317	226.896	982.079	-0.97344	0.67578	-0.25488
2.182	41.495	61.5996	468.7	-0.72168	0.16895	-0.17773	-21.316	113.3934	155.1207	-0.070215	-0.077343	-0.063184	-21.6542	134.563	1525.4021	-1.6191	1.1484	-0.4043	-151.366	204.3096	545.564	-0.39014	0.30273	-0.15283	10.264	-85.09083	987.1415	-1.8912	0.9205	-0.11162	-43.3142	156.3217	336.95975	-0.099121	-0.026367	-0.086914	52.03	213.106	967.44585	-0.9375	0.64453	-0.23301
2.184	123.088	57.5667	608.566	-0.98193	0.22314	-0.16406	6.037	69.0343	168.7472	-0.063965	-0.085938	-0.062988	-61.426	116.6708	1485.2042	-1.5994	1.1262	-0.39038	-131.829	147.435	530.525	-0.34814	0.27168	-0.13877	50.0925	-89.116	997.9661	-2.0374	1.0428	-0.10986	-20.008	167.131	330.40939	-0.069824	-0.053223	-0.086914	86.3092	230.088	971.725	-0.90048	0.61494	-0.21084
2.186	88.286	76.599	745.829	-1.1318	0.25537	-0.16455	17.916	103.221	134.6718	-0.06377	-0.089941	-0.065137	-30.2346	88.335	1473.9352	-1.5815	1.1001	-0.37939	-114.991	225.657	484.978	-0.30938	0.24131	-0.12422	78.767	-120.229	1000.665	-2.1339	1.162	-0.11143	-64.269	212.215	270.3871	-0.057129	-0.064453	-0.091309	56.057	215.683	928.2307	-0.86719	0.58105	-0.19629
2.188	50.564	73.073	917.0331	-1.4585	0.33838	-0.16016	56.5823	23.476	132.424	-0.05586	-0.09502	-0.06709	-67.181	130.9226	1423.031	-1.5625	1.0684	-0.35742	-138.058	203.5452	467.59	-0.2711	0.21865	-0.11016	83.88	-96.833	989.27	-2.1733	1.2607	-0.11513	-61.609	132.642	261.6417	-0.033691	-0.085938	-0.091309	38.386	182.971	902.261	-0.82509	0.55127	-0.17432
2.19	92.18	61.887	1049.5333	-1.7229	0.42651	-0.15162	60.3989	50.14347	116.1549	-0.049219	-0.10166	-0.068653	-93.68	107.802	1414.5101	-1.5488	1.0508	-0.34619	-118.597	188.5097	469.1968	-0.23887	0.19219	-0.095019	103.621	-130.708	994.679	-2.1445	1.3301	-0.12207	-72.7856	127.858	248.801	-0.021728	-0.10205	-0.087402	52.08	206.8933	871.1816	-0.78984	0.51934	-0.15459
2.192	-3.23	45.821	1100.8081	-1.9839	0.53174	-0.146	40.014	76.4507	85.3928	-0.045606	-0.11142	-0.072461	-44.5539	119.8708	1410.72019	-1.5132	1.0151	-0.32959	-103.7947	238.979	423.253	-0.20703	0.16992	-0.085938	142.011	-52.2	994.0179	-2.0473	1.3387	-0.12529	-105.972	113.7925	226.03	-0.01123	-0.11426	-0.094238	6.94	214.19322	852.949	-0.75078	0.4873	-0.13466
[truncated: 11,903 more rows]
