# Supplementary material for: Reliability and Validity of Running Cadence and Stance Time Derived from Instrumented Wireless Earbuds
Source: Sensors (Basel). 2021 Nov 30;21(23):7995. doi: 10.3390/s21237995 (PMC8659722; doi:10.3390/s21237995)
Supplement: Supplementary file 1 [file sensors-21-07995-s001.zip › Data_P13_speeds_1.csv]

time	S7kmh_force_plate_1	S7kmh_force_plate_2	S7kmh_force_plate_3	S7kmh_earbuds_1	S7kmh_earbuds_2	S7kmh_earbuds_3	S10kmh_force_plate_1	S10kmh_force_plate_2	S10kmh_force_plate_3	S10kmh_earbuds_1	S10kmh_earbuds_2	S10kmh_earbuds_3	S13kmh_force_plate_1	S13kmh_force_plate_2	S13kmh_force_plate_3	S13kmh_earbuds_1	S13kmh_earbuds_2	S13kmh_earbuds_3	max_force_plate_1	max_force_plate_2	max_force_plate_3	max_earbuds_1	max_earbuds_2	max_earbuds_3
0	-43.5094	104.97	219.2443	-0.061035	0.23389	-0.019043	89.97	-141.6645	1651.562	-1.502	2.4297	-0.95313	-54.7265	-165.488	1913.0529	-2.8594	2.459	-1.0176	NaN	NaN	NaN	NaN	NaN	NaN
0.002	-24.114	105.116	202.2639	-0.037598	0.22168	-0.01709	66.9638	-115.523	1593.928	-1.3921	2.4028	-0.94824	-69.142	-153.261	1937.025	-2.625	2.2715	-1.0234	NaN	NaN	NaN	NaN	NaN	NaN
0.004	-41.3851	100.027	191.09818	-0.023438	0.21851	-0.01001	79.267	-137.016	1619.913	-1.3091	2.3501	-0.95606	-63.345	-104.11	1894.203	-2.5054	2.1626	-1.0229	NaN	NaN	NaN	NaN	NaN	NaN
0.006	-40.8878	84.523	173.816	-0.013184	0.2085	-0.015625	58.3814	-70.414	1614.143	-1.2417	2.2974	-0.95068	-68.9	-60.323	1855.7532	-2.3516	2.0684	-1.0098	NaN	NaN	NaN	NaN	NaN	NaN
0.008	-23.566	91.1006	176.8957	0.0063477	0.19873	-0.012207	64.9688	-75.252	1616.524	-1.1992	2.2402	-0.94922	-45.794	-7.471	1821.165	-2.3354	2.1069	-1.0015	NaN	NaN	NaN	NaN	NaN	NaN
0.01	-32.5214	93.6208	147.6833	0.014648	0.18994	0.0019531	114.554	-65.1085	1636.5155	-1.189	2.2114	-0.94678	-69.446	23.6897	1802.156	-2.3823	2.1802	-0.99951	NaN	NaN	NaN	NaN	NaN	NaN
0.012	-45.7139	93.0071	141.62333	0.029785	0.17578	0.0039063	76.76453	-20.264	1617.955	-1.1851	2.1509	-0.94092	-21.194	56.9163	1784.979	-2.3926	2.2637	-0.92188	NaN	NaN	NaN	NaN	NaN	NaN
0.014	-25.105	71.5914	134.3483	0.040527	0.15918	0.0065918	82.7036	-28.229	1616.3101	-1.1726	2.1037	-0.93921	-4.431	60.989	1791.817	-2.3379	2.2695	-0.88281	NaN	NaN	NaN	NaN	NaN	NaN
0.016	-13.497	78.0503	135.8979	0.047363	0.14453	0.0053711	110.057	13.613	1629.3862	-1.1553	2.0469	-0.93359	23.0629	81.672	1785.12452	-2.1563	2.1699	-0.85254	NaN	NaN	NaN	NaN	NaN	NaN
0.018	-20.6506	93.1646	124.85777	0.05957	0.12598	0.010254	80.639	34.383	1616.4475	-1.1113	1.9707	-0.92676	11.22672	63.307	1803.766	-2.0178	2.0325	-0.85621	NaN	NaN	NaN	NaN	NaN	NaN
0.02	5.506	86.3032	117.82683	0.064453	0.11963	0.015137	99.158	-28.3798	1636.808	-1.0705	1.9241	-0.91772	22.4607	80.678	1781.802	-1.9077	1.8892	-0.86377	NaN	NaN	NaN	NaN	NaN	NaN
0.022	11.115	75.3743	93.7792	0.079102	0.095215	0.011719	116.679	-21.0464	1637.1749	-1.0313	1.877	-0.91211	25.1279	63.2633	1770.765	-1.8184	1.75	-0.875	NaN	NaN	NaN	NaN	NaN	NaN
0.024	4.531	72.0665	86.7541	0.085205	0.078613	0.01709	117.754	-63.104	1628.0676	-0.98633	1.8438	-0.90723	80.212	97.746	1740.606	-1.7813	1.6953	-0.875	NaN	NaN	NaN	NaN	NaN	NaN
0.026	21.3738	63.2196	74.2819	0.094238	0.062012	0.021973	117.901	-72.755	1655.8384	-0.97217	1.8345	-0.90771	69.48372	58.672	1744.9407	-1.7378	1.6353	-0.87646	NaN	NaN	NaN	NaN	NaN	NaN
0.028	27.681	61.4018	65.7431	0.10449	0.039551	0.021484	122.595	-15.36317	1643.453	-0.95654	1.8188	-0.90186	72.132	80.8302	1732.349	-1.7251	1.6265	-0.86865	NaN	NaN	NaN	NaN	NaN	NaN
0.03	35.5552	65.4085	64.6097	0.11426	0.025879	0.021973	120.995	-26.444	1612.38	-0.95411	1.8023	-0.8877	57.492	29.343	1726.689	-1.7227	1.6309	-0.86328	NaN	NaN	NaN	NaN	NaN	NaN
0.032	33.8903	62.0119	58.6697	0.12793	0.0014648	0.027344	116.666	-11.3481	1596.631	-0.95068	1.7954	-0.87842	59.124	43.643	1677.515	-1.7339	1.6509	-0.84131	NaN	NaN	NaN	NaN	NaN	NaN
0.034	41.9921	58.3505	61.18345	0.13281	-0.015381	0.032471	94.554	13.86795	1549.6855	-0.95068	1.7622	-0.86279	81.3706	12.698	1676.349	-1.7407	1.6626	-0.82178	NaN	NaN	NaN	NaN	NaN	NaN
0.036	30.8043	38.1475	56.4195	0.13623	-0.032227	0.03125	98.171	-18.5125	1577.406	-0.94336	1.749	-0.85156	71.0164	81.396	1632.4	-1.7344	1.6602	-0.80273	NaN	NaN	NaN	NaN	NaN	NaN
0.038	32.7051	28.1355	50.7629	0.15381	-0.047363	0.036621	84.467	49.859	1566.736	-0.92529	1.7036	-0.8335	63.003	80.136	1596.313	-1.6973	1.6426	-0.78027	NaN	NaN	NaN	NaN	NaN	NaN
0.04	37.7523	44.293	37.4605	0.15918	-0.059082	0.036133	53.3181	58.3638	1548.8116	-0.89966	1.6667	-0.81323	15.356	174.6581	1543.198	-1.6655	1.6226	-0.76514	NaN	NaN	NaN	NaN	NaN	NaN
0.042	11.594	43.665	41.8182	0.16797	-0.080078	0.033691	73.744	76.6391	1528.0177	-0.87109	1.627	-0.80176	-52.207	166.418	1511.994	-1.605	1.5649	-0.73193	NaN	NaN	NaN	NaN	NaN	NaN
0.044	11.242	42.671	37.6099	0.17993	-0.09668	0.037109	56.88597	120.213	1463.964	-0.83691	1.5723	-0.78027	-84.7193	231.697	1470.878	-1.5603	1.511	-0.70093	NaN	NaN	NaN	NaN	NaN	NaN
0.046	-4.138	30.405	41.1265	0.18896	-0.11133	0.036133	40.7513	82.7639	1440.0404	-0.81641	1.541	-0.77344	-85.0173	187.353	1425.7119	-1.5112	1.4556	-0.67139	NaN	NaN	NaN	NaN	NaN	NaN
0.048	9.1224	19.1102	26.6803	0.20313	-0.125	0.038086	48.834	110.697	1421.1705	-0.78857	1.4868	-0.75342	-80.068	231.419	1372.0667	-1.4487	1.3774	-0.63037	NaN	NaN	NaN	NaN	NaN	NaN
0.05	-10.9704	15.6659	39.9921	0.21094	-0.13721	0.039063	29.6926	121.488	1391.4442	-0.77051	1.4462	-0.73657	-123.0453	169.4276	1324.461	-1.4121	1.3379	-0.60156	NaN	NaN	NaN	NaN	NaN	NaN
0.052	-34.6999	5.825	33.4726	0.21777	-0.14844	0.041992	43.627	80.6744	1395.773	-0.75342	1.4048	-0.71826	-141.7487	212.865	1257.544	-1.3354	1.2817	-0.5708	NaN	NaN	NaN	NaN	NaN	NaN
0.054	-13.213	11.082	16.3462	0.22119	-0.1582	0.043701	21.45375	116.6298	1380.5376	-0.73389	1.3589	-0.69189	-170.5	171.03	1212.784	-1.2779	1.2393	-0.54224	NaN	NaN	NaN	NaN	NaN	NaN
0.056	-15.2417	27.3322	3.9413	0.22559	-0.16602	0.043945	9.3157	91.546	1336.544	-0.72021	1.3325	-0.6792	-171.094	238.138	1175.2471	-1.2183	1.1958	-0.50049	NaN	NaN	NaN	NaN	NaN	NaN
0.058	-20.3467	16.0893	8.88848	0.2251	-0.16699	0.052734	30.1955	67.333	1338.755	-0.70996	1.2832	-0.65137	-139.165	193.13	1139.8956	-1.1348	1.127	-0.45117	NaN	NaN	NaN	NaN	NaN	NaN
0.06	-39.0763	1.7963	8.310608	0.22607	-0.16064	0.054199	3.3379	126.0134	1279.5522	-0.69361	1.2502	-0.63061	-135.101	253.2685	1104.896	-1.082	1.0811	-0.42188	NaN	NaN	NaN	NaN	NaN	NaN
0.062	-15.9366	-0.81207	16.2265	0.22266	-0.15576	0.060547	-1.5543	110.4268	1250.29742	-0.68457	1.2168	-0.60742	-145.6381	207.78	1065.846	-0.9707	0.9873	-0.37354	NaN	NaN	NaN	NaN	NaN	NaN
0.064	-22.6017	21.1347	18.8464	0.21484	-0.14795	0.061768	18.205	149.566	1257.5473	-0.66602	1.1699	-0.57715	-160	268.2159	1010.673	-0.88428	0.91113	-0.34106	NaN	NaN	NaN	NaN	NaN	NaN
0.066	-44.3665	14.5058	23.0382	0.20605	-0.13916	0.065918	24.3735	172.181	1199.4126	-0.65381	1.1401	-0.56396	-138.9762	220.819	971.159	-0.80615	0.83252	-0.30811	NaN	NaN	NaN	NaN	NaN	NaN
0.068	-24.9295	13.1074	22.3047	0.18896	-0.11865	0.068359	24.5767	124.429	1197.868	-0.63428	1.0845	-0.52881	-151.788	259.7885	938.378	-0.70313	0.73047	-0.26465	NaN	NaN	NaN	NaN	NaN	NaN
0.07	-3.794	11.6791	19.0004	0.17261	-0.1001	0.074707	34.98	167.9375	1174.7868	-0.61475	1.0402	-0.50415	-120.83972	193.459	879.295	-0.65869	0.68408	-0.24951	NaN	NaN	NaN	NaN	NaN	NaN
0.072	-2.621	14.7353	13.9077	0.1582	-0.08252	0.081055	16.6975	128.208	1134.2197	-0.59131	1.001	-0.47803	-87.816	252.235	838.884	-0.57666	0.58008	-0.2085	NaN	NaN	NaN	NaN	NaN	NaN
0.074	-1.444	10.0248	4.9449	0.13232	-0.058594	0.086914	22.076	133.438	1121.128	-0.56201	0.93799	-0.44775	-53.372	222.298	787.594	-0.51635	0.52417	-0.18677	NaN	NaN	NaN	NaN	NaN	NaN
0.076	16.3344	-2.2708	6.6057	0.12354	-0.039551	0.090332	22.536	189.9819	1051.4053	-0.54688	0.91211	-0.43115	-42.445	303.432	748.422	-0.46143	0.45947	-0.1665	NaN	NaN	NaN	NaN	NaN	NaN
0.078	20.52105	5.3983	16.4048	0.10156	-0.013672	0.098633	-0.351999999999997	155.2506	1028.8605	-0.51709	0.85596	-0.39795	-15.354	246.356	676.8058	-0.38623	0.38867	-0.13672	NaN	NaN	NaN	NaN	NaN	NaN
0.08	38.93841	14.1185	24.323	0.093018	0.0070799	0.096679	37.6102	198.625	997.81684	-0.49365	0.81103	-0.37353	-33.538	285.576	623.0854	-0.34717	0.35547	-0.11865	NaN	NaN	NaN	NaN	NaN	NaN
0.082	27.8839	5.6179	18.6243	0.083008	0.03125	0.09668	11.1832	191.242	941.319	-0.46973	0.76953	-0.34766	-6.719	220.3925	565.4837	-0.27539	0.29639	-0.092773	NaN	NaN	NaN	NaN	NaN	NaN
0.084	37.20412	5.57951	30.7042	0.068359	0.0625	0.096191	6.947	152.7902	935.2181	-0.43896	0.71631	-0.31006	12.534	244.358	530.573	-0.22901	0.25073	-0.068115	NaN	NaN	NaN	NaN	NaN	NaN
0.086	47.0237	6.89569	25.512	0.063477	0.070313	0.10596	4.241	197.0448	914.4706	-0.42188	0.68555	-0.29688	37.31	186.5721	508.6095	-0.18164	0.20996	-0.046387	NaN	NaN	NaN	NaN	NaN	NaN
0.088	25.2971	5.5865317	18.2863	0.049805	0.10059	0.099121	-9.658	181.7077	890.349	-0.38232	0.62842	-0.26855	8.68	219.488	480.683	-0.12646	0.1665	-0.024414	NaN	NaN	NaN	NaN	NaN	NaN
0.09	15.9484	-4.6144	15.1358	0.039063	0.11889	0.09253	2.947	178.87684	881.633	-0.34692	0.58129	-0.24756	2.543	170.663	443.76	-0.10645	0.14648	-0.010742	NaN	NaN	NaN	NaN	NaN	NaN
0.092	28.5464	3.23878	10.692	0.03125	0.13867	0.088867	-12.655	211.44	830.305	-0.31445	0.53662	-0.22705	-20.381	217.437	405.96	-0.059082	0.11377	0.01416	NaN	NaN	NaN	NaN	NaN	NaN
0.094	40.4601	12.22474	14.8822	0.024414	0.15771	0.074219	-15.813	163.1975	799.448	-0.2583	0.47754	-0.20459	-16.294	179.573	368.054	-0.032715	0.094725	0.029052	NaN	NaN	NaN	NaN	NaN	NaN
0.096	18.0524	-11.9199	40.6684	0.016113	0.16895	0.06543	-11.416	185.6833	752.624	-0.23779	0.45166	-0.18896	-21.21	197.912	354.952	-0.010254	0.07373	0.045898	NaN	NaN	NaN	NaN	NaN	NaN
0.098	14.328	-34.1582	55.4708	0.010742	0.18408	0.048828	-17.9437	188.4853	684.2328	-0.19434	0.40625	-0.17627	1.574	143.219	297.576	0.0068359	0.051758	0.065918	NaN	NaN	NaN	NaN	NaN	NaN
0.1	20.0796	-38.87089	62.02271	-0.0043945	0.19531	0.043946	-28.197	151.348	669.918	-0.17212	0.38111	-0.1543	-20.792	152.6044	248.42545	0.010254	0.040527	0.074707	NaN	NaN	NaN	NaN	NaN	NaN
0.102	-1.257	-34.2032	81.5657	-0.02832	0.19922	0.03125	-51.7858	181.2996	646.3243	-0.15381	0.36084	-0.13623	-24.2957	96.403	190.50059	0.01123	0.03418	0.087402	NaN	NaN	NaN	NaN	NaN	NaN
0.104	-11.5207	-46.3187	92.8934	-0.063477	0.21143	0.0068359	-39.626	134.553	595.572	-0.14697	0.34961	-0.11084	-72.4035	89.813	168.89514	0.0039062	0.031494	0.097901	NaN	NaN	NaN	NaN	NaN	NaN
0.106	-44.399	-77.6352	145.6304	-0.094238	0.21533	-0.0097656	-32.327	131.102	574.4832	-0.15039	0.34961	-0.097656	-80.16454	67.058	122.148	-0.013184	0.029785	0.10059	NaN	NaN	NaN	NaN	NaN	NaN
0.108	-46.302	-73.7261	190.34	-0.14697	0.23682	-0.039551	-30.8974	171.0601	524.92034	-0.1582	0.33545	-0.07666	-83.5936	101.4	103.4025	-0.043945	0.03125	0.11328	NaN	NaN	NaN	NaN	NaN	NaN
0.11	-78.2272	-46.5308	247.546	-0.20068	0.25757	-0.0625	-45.449	144.3701	510.71	-0.15552	0.33618	-0.060302	-49.504	115.5125	63.0247	-0.062012	0.035156	0.11523	NaN	NaN	NaN	NaN	NaN	NaN
0.112	-95.132	-21.6854	346.439	-0.26416	0.2876	-0.084473	-25.326	194.939	472.0656	-0.16064	0.33447	-0.047852	-75.083	130.625	62.975	-0.10938	0.047363	0.12842	NaN	NaN	NaN	NaN	NaN	NaN
0.114	-108.386	-35.447	454.74	-0.37695	0.33984	-0.12207	-42.509	199.424	408.402	-0.1626	0.33398	-0.045898	-99.877	106.363	50.47	-0.14258	0.058838	0.13867	NaN	NaN	NaN	NaN	NaN	NaN
0.116	-123.781	-50.432	548.7708	-0.44434	0.37402	-0.14111	-4.734	158.4506	394.6762	-0.16553	0.33008	-0.029785	-114.477	89.888	49.9075	-0.17529	0.066406	0.14307	NaN	NaN	NaN	NaN	NaN	NaN
0.118	-135.943	-45.85094	599.4548	-0.60107	0.4585	-0.18994	13.216	173.20124	356.107	-0.16309	0.31982	-0.014648	-75.573	75.3642	6.1725	-0.21729	0.081055	0.15674	NaN	NaN	NaN	NaN	NaN	NaN
0.12	-103.223	-54.198	637.9792	-0.73462	0.5354	-0.21045	-11.1652	129.538	339.65638	-0.15966	0.3125	-0.0058594	-64.0921	46.118	12.558	-0.23438	0.089844	0.16406	NaN	NaN	NaN	NaN	NaN	NaN
0.122	-37.809	-48.006	696.0866	-0.87695	0.62695	-0.21826	13.909	126.231	326.3678	-0.15771	0.3042	0.0019531	-46.8316	34.2613	0.388	-0.26172	0.10596	0.16943	NaN	NaN	NaN	NaN	NaN	NaN
0.124	-60.548	-30.579	726.118	-1.0845	0.75244	-0.22217	13.417	146.3624	273.789	-0.15771	0.30029	0.0058594	-34.45	12.303	-0.971	-0.28149	0.11401	0.17309	NaN	NaN	NaN	NaN	NaN	NaN
0.126	-39.074	-29.08	737.793	-1.1953	0.81836	-0.21973	5.0651	116.0902	273.088	-0.16016	0.29639	0.010742	-6.799	36.30484	-36.82	-0.2998	0.12598	0.17676	NaN	NaN	NaN	NaN	NaN	NaN
0.128	15.5	-40.8776	747.985	-1.4043	0.95508	-0.21289	11.9382	138.719	259.916	-0.15479	0.28906	0.019043	7.126	14.767	-7.6255	-0.32959	0.14258	0.17627	NaN	NaN	NaN	NaN	NaN	NaN
0.13	33.707	-54.7628	786.9008	-1.5464	1.0659	-0.20069	30.062237	135.2	214.2429	-0.15064	0.29273	0.024903	18.217	48.5485	12.9423	-0.34033	0.15283	0.1792	NaN	NaN	NaN	NaN	NaN	NaN
0.132	39.519	-37.045	825.009	-1.6655	1.1743	-0.18555	24.192	102.77451	204.78277	-0.14697	0.29248	0.030762	34.4353	5.233	37.3385	-0.37207	0.17285	0.17822	NaN	NaN	NaN	NaN	NaN	NaN
0.134	33.517	-38.726	844.644	-1.7749	1.3013	-0.17529	31.2156	121.9373	188.2296	-0.13135	0.29346	0.030762	51.712	30.087	7.7016	-0.39209	0.18237	0.17456	NaN	NaN	NaN	NaN	NaN	NaN
0.136	73.382	-51.235	844.7543	-1.8145	1.3535	-0.17969	27.7988	81.1328	173.6609	-0.11914	0.28613	0.034668	49.042	6.36409	29.351	-0.4126	0.19238	0.17334	NaN	NaN	NaN	NaN	NaN	NaN
0.138	72.533	-54.8486	851.623	-1.8374	1.4321	-0.18408	28.485	78.67	161.375	-0.097168	0.28467	0.041504	51.9052	43.201	33.8696	-0.43555	0.20605	0.17236	NaN	NaN	NaN	NaN	NaN	NaN
0.14	80.498	-44.157	861.174	-1.794	1.4497	-0.19238	36.0355	111.6862	118.9674	-0.07959	0.27954	0.044434	44.0258	1.13032	66.774	-0.44727	0.21484	0.1748	NaN	NaN	NaN	NaN	NaN	NaN
0.142	76.622	-24.395	877.2997	-1.7104	1.4399	-0.20459	7.718	80.116	111.219	-0.061523	0.26953	0.043457	36.152	47.568	37.8145	-0.46094	0.22461	0.17627	NaN	NaN	NaN	NaN	NaN	NaN
0.144	96.203	-7.145	895.3292	-1.5327	1.3813	-0.21387	41.0213	107.6247	94.004	-0.039063	0.25049	0.042969	34.2627	9.7716	30.7919	-0.45849	0.23438	0.17651	NaN	NaN	NaN	NaN	NaN	NaN
0.146	88.189	-9.057	894.6274	-1.4429	1.3462	-0.21436	4.5695	112.692	63.4501	-0.025391	0.24219	0.046387	39.2944	77.983	15.4806	-0.45361	0.24316	0.18066	NaN	NaN	NaN	NaN	NaN	NaN
0.148	34.096	-39.731	879.4012	-1.2715	1.2852	-0.21289	-2.733	77.5363	63.5637	-0.0053711	0.21777	0.049316	40.2366	25.87117	32.75	-0.44336	0.25	0.19824	NaN	NaN	NaN	NaN	NaN	NaN
0.15	41.218	-74.208	886.1124	-1.1753	1.2515	-0.20215	11.5698	87.319	45.9495	0.008301	0.19702	0.052246	19.755	64.464	12.533	-0.42529	0.24512	0.18994	NaN	NaN	NaN	NaN	NaN	NaN
0.152	60.357	-106.1813	888.3217	-1.105	1.2212	-0.17139	-6.8773	36.0014	42.481	0.020508	0.17578	0.056152	22.147	-6.4967	8.5301	-0.39453	0.23535	0.20361	NaN	NaN	NaN	NaN	NaN	NaN
0.154	73.207	-126.6175	906.949	-1.0508	1.1816	-0.14063	-6.318	28.2254	46.175	0.032715	0.14893	0.05957	8.761	25.7033	-9.3268	-0.36352	0.21997	0.20899	NaN	NaN	NaN	NaN	NaN	NaN
0.156	64.156	-132.3163	892.464	-1.0254	1.1602	-0.12988	-20.3133	47.273	0.428000000000001	0.046386	0.12402	0.063476	-24.4569	-41.445	20.0566	-0.32129	0.2002	0.21143	NaN	NaN	NaN	NaN	NaN	NaN
0.158	52.163	-134.09	887.2064	-0.96338	1.1235	-0.12256	-7.747	12.9486	1.0778	0.059082	0.097656	0.06543	-41.974	6.8254	27.6865	-0.25732	0.16016	0.22461	NaN	NaN	NaN	NaN	NaN	NaN
0.16	59.72	-131.09661	903.484	-0.89673	1.0911	-0.12231	-41.983	33.5849	13.3093	0.081543	0.06543	0.066895	-36.4421	-27.1816	33.36	-0.22461	0.13477	0.23096	NaN	NaN	NaN	NaN	NaN	NaN
0.162	14.631	-142.974	928.489	-0.82373	1.0503	-0.13037	-18.3019	31.2343	11.1976	0.091309	0.051758	0.068848	-61.697	38.6813	22.529	-0.14697	0.074707	0.23779	NaN	NaN	NaN	NaN	NaN	NaN
0.164	-8.075	-166.719	952.2451	-0.729	0.99658	-0.14502	-3.1007	5.552	16.2044	0.10938	0.021973	0.076172	-78.797	-20.57479	21.9887	-0.070801	0.0097656	0.24707	NaN	NaN	NaN	NaN	NaN	NaN
0.166	-44.543	-170.915	987	-0.68896	0.96143	-0.1499	7.3862	28.0489	8.602	0.12451	-0.006592	0.081543	-85.1218	14.6624	10.2154	-0.030273	-0.019043	0.24316	NaN	NaN	NaN	NaN	NaN	NaN
0.168	-47.1613	-142.6558	1008.724	-0.62842	0.9126	-0.15723	-12.2108	5.422	-0.968	0.14453	-0.032227	0.087402	-81.97	-46.221	15.1553	0.049805	-0.092285	0.24463	NaN	NaN	NaN	NaN	NaN	NaN
0.17	-85.862	-115.516	1014.025	-0.60962	0.88501	-0.16015	-3.728	-9.2179	6.4232	0.1665	-0.063965	0.093262	-68.5904	8.8397	-0.1729	0.1123	-0.14819	0.23804	NaN	NaN	NaN	NaN	NaN	NaN
0.172	-95.207	-109.61	998.402	-0.60742	0.86523	-0.16504	20.0892	16.93289	-5.8164	0.18311	-0.078125	0.094238	-28.0171	-21.1338	-16.9009	0.17627	-0.19922	0.23145	NaN	NaN	NaN	NaN	NaN	NaN
0.174	-66.776	-125.03	1010.762	-0.61719	0.85449	-0.16406	-23.4278	-13.6123	8.7639	0.20508	-0.11279	0.104	-46.522	30.94214	-23.0346	0.25244	-0.26953	0.23096	NaN	NaN	NaN	NaN	NaN	NaN
0.176	-52.6821	-132.164	1050.956	-0.62842	0.85205	-0.1626	33.0006	10.3069	28.1388	0.22315	-0.13623	0.10938	-38.4377	-20.6856	-13.2051	0.2876	-0.30762	0.22168	NaN	NaN	NaN	NaN	NaN	NaN
0.178	-46.682	-146.738	1078.7269	-0.64111	0.84131	-0.15723	16.49773	8.04068	17.05662	0.24219	-0.15869	0.11475	-48.608	36.5764	-16.4531	0.34961	-0.36768	0.21143	NaN	NaN	NaN	NaN	NaN	NaN
0.18	-75.84	-165.6423	1112.886	-0.65406	0.82349	-0.15113	16.856	-11.1749	26.3068	0.25879	-0.18506	0.11426	-29.0899	13.712	-11.0201	0.38916	-0.39869	0.20264	NaN	NaN	NaN	NaN	NaN	NaN
0.182	-54.6699	-161.56	1132.371	-0.65137	0.79102	-0.14941	34.8548	25.8699	18.8592	0.27002	-0.19922	0.10938	-1.634	65.3552	-2.3102	0.41943	-0.42822	0.19775	NaN	NaN	NaN	NaN	NaN	NaN
0.184	-31.743	-147.558	1146.67	-0.63672	0.73926	-0.15186	2.3612	8.0928	-9.0135	0.29053	-0.21387	0.11182	15.90234	36.275	20.0165	0.4458	-0.4585	0.19385	NaN	NaN	NaN	NaN	NaN	NaN
0.186	-26.449	-146.956	1148.705	-0.62842	0.71387	-0.16406	36.9949	2.2378	12.1726	0.29908	-0.21851	0.11597	13.478	45.127	21.1071	0.45215	-0.46973	0.18994	NaN	NaN	NaN	NaN	NaN	NaN
0.188	-29.568	-167.633	1170.839	-0.62891	0.66602	-0.17725	47.2224	7.55235	1.001	0.30322	-0.21924	0.11914	21.24	19.0019	-0.1845	0.44971	-0.47656	0.18945	NaN	NaN	NaN	NaN	NaN	NaN
0.19	-27.629	-174.014	1189.6069	-0.646	0.6438	-0.19262	24.401	-25.9	6.9917	0.30469	-0.21826	0.12842	40.069	44.585	-1.956	0.43188	-0.4707	0.18848	NaN	NaN	NaN	NaN	NaN	NaN
0.192	-9.475	-156.27254	1236.6555	-0.68115	0.62744	-0.20752	38.0856	3.5024	19.9562	0.30273	-0.20947	0.1377	49.5058	16.0956	-0.0659000000000001	0.41016	-0.46484	0.18604	NaN	NaN	NaN	NaN	NaN	NaN
0.194	-10.892	-145.663	1281.675	-0.76172	0.6377	-0.23096	39.9456	4.803	18.2725	0.29395	-0.21191	0.13965	50.9724	18.1438	26.4258	0.36914	-0.43555	0.18945	NaN	NaN	NaN	NaN	NaN	NaN
0.196	22.829	-136.733	1310.445	-0.80859	0.65918	-0.23438	9.931	-8.4032	29.6894	0.28955	-0.20069	0.14331	63.486	10.69694	25.2762	0.34668	-0.42334	0.18701	NaN	NaN	NaN	NaN	NaN	NaN
0.198	43.8369	-131.376	1325.705	-0.94531	0.72461	-0.24023	29.05843	18.9424	31.434	0.28467	-0.19336	0.1499	38.0377	25.6016	14.668	0.29443	-0.38672	0.18555	NaN	NaN	NaN	NaN	NaN	NaN
0.2	46.7594	-124.75	1300.6438	-1.0651	0.79565	-0.24463	13.1361	-5.6469	4.3819	0.27881	-0.18115	0.15527	46.3672	32.169	12.4323	0.25977	-0.34766	0.19409	NaN	NaN	NaN	NaN	NaN	NaN
0.202	28.624	-107.9015	1285.783	-1.1953	0.87598	-0.24805	0.872000000000002	-17.7996	3.8144	0.27002	-0.17383	0.16357	43.893	22.2495	39.5059	0.22705	-0.31592	0.19287	NaN	NaN	NaN	NaN	NaN	NaN
0.204	27.629	-92.20125	1303.8081	-1.3789	0.99805	-0.24951	4.0153	-4.8223	-12.8651	0.25635	-0.15674	0.16602	10.268	22.5405	26.4619	0.19189	-0.2793	0.18994	NaN	NaN	NaN	NaN	NaN	NaN
0.206	56.8357	-87.4821	1326.176	-1.5232	1.0979	-0.26538	-22.2799	-38.883	-12.56639	0.24512	-0.13769	0.17188	-1.637	22.7453	20.88589	0.17627	-0.26172	0.18896	NaN	NaN	NaN	NaN	NaN	NaN
0.208	30.071	-91.237	1339.593	-1.6719	1.2109	-0.29004	-5.039	-14.3597	-4.5556	0.23438	-0.11768	0.17773	-1.121	35.4599	17.2969	0.15723	-0.23828	0.18164	NaN	NaN	NaN	NaN	NaN	NaN
0.21	21.709	-100.79	1338.2197	-1.8647	1.3833	-0.31494	-23.4007	0.87312	-26.935	0.21924	-0.085938	0.17773	-30.482	30.213	37.6478	0.14453	-0.22632	0.17431	NaN	NaN	NaN	NaN	NaN	NaN
0.212	2.612	-110.852	1333.894	-1.9512	1.4609	-0.32813	-20.1515	-3.9901	-13.59341	0.20654	-0.067871	0.17383	-37.438	34.3174	48.378	0.14014	-0.21582	0.17285	NaN	NaN	NaN	NaN	NaN	NaN
0.214	5.445	-78.1279	1350.233	-2.0996	1.6133	-0.35156	4.945	31.0946	-3.7949	0.18701	-0.033691	0.18457	-44.563	10.4527	19.6814	0.13379	-0.20117	0.16992	NaN	NaN	NaN	NaN	NaN	NaN
0.216	-16.098	-63.694	1374.9243	-2.1772	1.7036	-0.36621	-15.5724	5.13911	-7.5487	0.17285	-0.015381	0.18847	-60.4413	33.541	-14.261	0.1333	-0.2002	0.16846	NaN	NaN	NaN	NaN	NaN	NaN
0.218	-43.705	-52.866	1398.297	-2.2104	1.7778	-0.37451	-7.289	13.9039	10.328	0.15332	0.0029297	0.17725	-63.847	4.3793	2.52	0.11572	-0.18848	0.16064	NaN	NaN	NaN	NaN	NaN	NaN
0.22	-75.4677	-71.025	1412.184	-2.1934	1.8496	-0.38672	-5.621	32.474	-9.7036	0.12695	0.028809	0.18457	-62.3843	15.0669	10.3467	0.092772	-0.17749	0.15674	NaN	NaN	NaN	NaN	NaN	NaN
0.222	-75.3932	-83.9058	1409.4248	-2.1558	1.8677	-0.38916	-21.7666	-7.0044	-7.3525	0.11377	0.04248	0.18213	-66.6315	-25.6548	34.9929	0.069336	-0.16162	0.15283	NaN	NaN	NaN	NaN	NaN	NaN
0.224	-77.1663	-101.797	1403.1089	-2.0542	1.8599	-0.37695	2.833	4.617	1.5298	0.097656	0.063477	0.17627	-62.1717	11.0482	10.5087	0.040039	-0.13232	0.14111	NaN	NaN	NaN	NaN	NaN	NaN
0.226	-86.7467	-103.744	1405.6906	-2.0352	1.8584	-0.40332	11.6183	2.8893	-20.778	0.091064	0.081543	0.1726	-60.453	-21.49446	10.9293	0.023438	-0.12354	0.14355	NaN	NaN	NaN	NaN	NaN	NaN
0.228	-97.0908	-85.135	1400.4914	-1.9922	1.8613	-0.41406	-13.476	-11.7507	-14.3925	0.083008	0.095215	0.16211	-60.3168	9.1625	-0.380400000000001	0.00097656	-0.09375	0.1333	NaN	NaN	NaN	NaN	NaN	NaN
0.23	-82.25294	-64.562	1404.5202	-1.9077	1.8267	-0.37695	18.23	21.9093	5.4507	0.076172	0.10791	0.15625	-47.6489	-43.824	28.4313	-0.0087891	-0.067382	0.12524	NaN	NaN	NaN	NaN	NaN	NaN
0.232	-71.2236	-46.165	1395.97	-1.8784	1.8071	-0.35352	15.6071	4.5536	-3.7909	0.07959	0.11328	0.15527	-44.971	8.0551	-2.93519	-0.016113	-0.049805	0.12012	NaN	NaN	NaN	NaN	NaN	NaN
0.234	-89.564	-60.2613	1412.9834	-1.8003	1.77	-0.3374	24.2704	4.6874	19.4778	0.082031	0.11572	0.14502	1.552	-14.3547	14.3119	-0.022461	-0.023926	0.10693	NaN	NaN	NaN	NaN	NaN	NaN
0.236	-65.3599	-56.6175	1426.9662	-1.7295	1.7154	-0.32789	20.9246	25.1176	11.5441	0.083252	0.1211	0.1355	12.009	29.776	-3.4973	-0.021973	-0.013184	0.10449	NaN	NaN	NaN	NaN	NaN	NaN
0.238	-45.39	-34.375	1445.883	-1.6597	1.6548	-0.31494	10.9741	4.8892	-7.4127	0.084961	0.11963	0.1333	14.922	-13.8655	16.918	-0.026855	0.0029297	0.094727	NaN	NaN	NaN	NaN	NaN	NaN
0.24	-73.8058	-10.984	1439.8317	-1.5659	1.5688	-0.29834	53.2944	13.9842	31.116	0.088867	0.11279	0.11963	6.952	37.9151	-11.6868	-0.03247	0.010498	0.085205	NaN	NaN	NaN	NaN	NaN	NaN
0.242	-82.099	-4.057	1437.3789	-1.521	1.5337	-0.29297	37.1074	19.8083	11.59439	0.090332	0.11279	0.11963	29.3201	12.8009	-2.105	-0.03418	0.020508	0.077148	NaN	NaN	NaN	NaN	NaN	NaN
0.244	-73.4208	-10.3664	1424.2831	-1.4565	1.4751	-0.29346	1.693	1.5883	11.1166	0.085938	0.11572	0.10938	26.403	72.952	-6.4556	-0.043945	0.032715	0.063965	NaN	NaN	NaN	NaN	NaN	NaN
0.246	-28.861	-2.7157	1412.7657	-1.4224	1.4321	-0.29492	35.8854	37.549	18.7583	0.081055	0.11596	0.10328	51.317	18.6355	16.1207	-0.049316	0.040527	0.060547	NaN	NaN	NaN	NaN	NaN	NaN
0.248	-18.751	0.0712000000000002	1407.403	-1.4038	1.4028	-0.28955	32.6099	15.2313	4.11682205	0.077148	0.1167	0.096191	32.913	48.999	6.1616	-0.065918	0.049805	0.05127	NaN	NaN	NaN	NaN	NaN	NaN
0.25	-16.147	5.2807	1394.256	-1.3979	1.3716	-0.28369	15.961	5.3378	17.9981	0.070313	0.1167	0.091797	48.1411	3.4668	-2.2243	-0.081055	0.059571	0.042236	NaN	NaN	NaN	NaN	NaN	NaN
0.252	5.581	12.9319	1392.2041	-1.3999	1.3579	-0.27979	23.6726	18.9223	0.23499	0.068848	0.11768	0.087891	33.123	41.8102	-29.3281	-0.09668	0.071289	0.032227	NaN	NaN	NaN	NaN	NaN	NaN
0.254	13.482	10.8698	1385.8528	-1.416	1.3379	-0.27637	-3.752	-2.5655	-5.1989	0.062012	0.11865	0.0625	42.736	5.9565	13.7323	-0.12207	0.086914	0.025391	NaN	NaN	NaN	NaN	NaN	NaN
0.256	13.866	-4.698	1369.0731	-1.4221	1.3225	-0.26929	-1.307	8.6249	9.0958	0.059326	0.12964	0.032471	36.628	49.1978	9.1081	-0.12939	0.094727	0.018555	NaN	NaN	NaN	NaN	NaN	NaN
0.258	17.663	-9.5745	1370.0503	-1.4312	1.3013	-0.26221	9.699	7.6418	17.096	0.056152	0.14502	0.0078125	16.043	14.357	14.6372	-0.15137	0.1123	0.01416	NaN	NaN	NaN	NaN	NaN	NaN
0.26	35.788	-2.8399	1365.848	-1.437	1.2778	-0.25537	-9.8956	-18.8282	47.36944	0.035645	0.18311	-0.016113	3.313	62.399	11.968	-0.16797	0.12842	0.011719	NaN	NaN	NaN	NaN	NaN	NaN
0.262	-2.684	27.2387	1350.2937	-1.4292	1.2603	-0.25928	12.9649	-38.7507	78.8879	0.0092773	0.20117	-0.035156	-1.176	16.0785	11.9448	-0.18262	0.14258	0.013184	NaN	NaN	NaN	NaN	NaN	NaN
0.264	-34.112	49.878	1333.0291	-1.4116	1.229	-0.24756	-32.1655	-41.702238	90.7735	-0.05957	0.26221	-0.078613	-31.384	42.6094	34.354	-0.20215	0.16309	0.0083008	NaN	NaN	NaN	NaN	NaN	NaN
0.266	-41.63	54.992	1318.643	-1.3867	1.209	-0.24195	-0.124000000000001	-23.2132	142.1022	-0.11865	0.31567	-0.13427	-39.4843	3.9009	48.217	-0.21143	0.17139	0.0068359	NaN	NaN	NaN	NaN	NaN	NaN
0.268	-21.985	52.515	1316.754	-1.3613	1.1895	-0.2373	-2.452	1.73	170.904	-0.19385	0.38525	-0.19385	-60.2355	25.1964	16.0095	-0.22754	0.1875	0.012695	NaN	NaN	NaN	NaN	NaN	NaN
0.27	-35.218	50.2391	1294.1507	-1.3198	1.1577	-0.23193	-74.206	-17.3197	225.3422	-0.31689	0.50293	-0.26758	-37.1463	0.7103	42.972	-0.24366	0.20288	0.01416	NaN	NaN	NaN	NaN	NaN	NaN
0.272	-55.767	39.95343	1262.216	-1.3027	1.1445	-0.22559	-34.403	11.6421	330.953	-0.39014	0.57666	-0.30273	-59.1227	-3.72372	102.961	-0.26074	0.21338	0.01709	NaN	NaN	NaN	NaN	NaN	NaN
0.274	-47.098	47.1379	1251.675	-1.2612	1.1118	-0.21631	-23.69	38.4751	429.132	-0.56982	0.73291	-0.36426	-69.6154	-7.0265	160.502	-0.28467	0.23096	0.022461	NaN	NaN	NaN	NaN	NaN	NaN
0.276	-50.856	51.8201	1232.83	-1.2337	1.0843	-0.22046	-48.59	34.123	593.224	-0.73633	0.86572	-0.40601	-70.299	55.5951	249.6353	-0.30322	0.23242	0.010254	NaN	NaN	NaN	NaN	NaN	NaN
0.278	-40.8428	68.8825	1218.0314	-1.2026	1.063	-0.2085	-26.633	25.4375	711.03	-0.91602	1.0098	-0.43115	-75.2946	57.272	352.1288	-0.32715	0.24854	-0.0092773	NaN	NaN	NaN	NaN	NaN	NaN
0.28	-58.23491	68.0505	1206.5921	-1.1758	1.0332	-0.20313	-70.75	-5.6442	773.01961	-1.1675	1.2056	-0.41553	-136.9816	46.851	524.491	-0.35205	0.27124	-0.033691	NaN	NaN	NaN	NaN	NaN	NaN
0.282	-64.9312	54.091	1193.1758	-1.1641	1.0127	-0.19922	-45.298	-29.753	847.261	-1.2905	1.3013	-0.39209	-113.9669	12.139	706.189	-0.38281	0.29785	-0.063965	NaN	NaN	NaN	NaN	NaN	NaN
0.284	-57.3559	62.258	1192.7513	-1.1382	0.98291	-0.20068	-21.996	-5.363	904.5972	-1.521	1.4731	-0.32471	-90.629	-30.3978	886.721	-0.44629	0.34082	-0.11035	NaN	NaN	NaN	NaN	NaN	NaN
0.286	-72.49	76.7872	1183.8933	-1.116	0.95972	-0.18408	-47.7666	-3.518	933.615	-1.6513	1.5976	-0.29053	-127.651	-67.194	1028.489	-0.4873	0.36475	-0.13916	NaN	NaN	NaN	NaN	NaN	NaN
0.288	-82.486	78.9891	1175.105	-1.1016	0.93164	-0.18555	-12.8231	-16.959	952.677	-1.73	1.7075	-0.27197	-136.004	-93.915	1169.4519	-0.59326	0.42627	-0.20264	NaN	NaN	NaN	NaN	NaN	NaN
0.29	-52.0534	94.07	1148.696	-1.0786	0.89307	-0.17822	37.0506	-57.3694	919.7014	-1.7104	1.8306	-0.27295	-110.531	-94.03	1248.196	-0.70166	0.4812	-0.24439	NaN	NaN	NaN	NaN	NaN	NaN
0.292	-34.66542	101.685	1114.3269	-1.0645	0.87891	-0.17773	37.373	-108.093	927.502	-1.5983	1.8733	-0.27392	-81.331	-71.928	1316.813	-0.83789	0.5459	-0.28906	NaN	NaN	NaN	NaN	NaN	NaN
0.294	-50.887	106.147	1078.2825	-1.0405	0.84424	-0.17285	100.614	-116.232	959.237	-1.4199	1.8594	-0.27148	-40.3313	-68.05	1337.74	-1.0718	0.65869	-0.3335	NaN	NaN	NaN	NaN	NaN	NaN
0.296	-17.3487	110.3303	1073.45365	-1.0212	0.82056	-0.16577	73.812	-119.042	932.774	-1.0933	1.7466	-0.26416	34.1524	-129.314	1390.193	-1.2762	0.76783	-0.34986	NaN	NaN	NaN	NaN	NaN	NaN
0.298	24.6324	115.0801	1045.6035	-1.002	0.79688	-0.16113	76.219	-127.708	935.432	-0.9209	1.6719	-0.26074	118.8478	-156.028	1406.228	-1.4917	0.89502	-0.34326	NaN	NaN	NaN	NaN	NaN	NaN
0.3	31.16142	128.289	1027.5191	-0.97217	0.771	-0.15234	98.218	-103.982	887.207	-0.63867	1.5254	-0.25684	177.9531	-250.77	1433.379	-1.7969	1.0703	-0.29883	NaN	NaN	NaN	NaN	NaN	NaN
0.302	42.4984	120.498	1002.649	-0.95654	0.75439	-0.15332	34.4303	-123.46636	844.7587	-0.50708	1.4514	-0.23779	165.027	-231.42	1423.193	-1.9507	1.1665	-0.25732	NaN	NaN	NaN	NaN	NaN	NaN
0.304	43.8465	113.3977	990.6302	-0.92578	0.72363	-0.14648	75.223	-92.084	873.1692	-0.44287	1.4004	-0.20898	140.9075	-249.42	1447.086	-2.2456	1.3677	-0.18359	NaN	NaN	NaN	NaN	NaN	NaN
0.306	55.3788	126.2113	959.65389	-0.896	0.70069	-0.14184	51.5946	-53.798	879.618	-0.46045	1.3638	-0.14697	141.204	-194.286	1389.9474	-2.4255	1.5179	-0.14843	NaN	NaN	NaN	NaN	NaN	NaN
0.308	51.172	137.528	951.497	-0.86719	0.67578	-0.13965	12.415	-79.089	902.608	-0.49561	1.3638	-0.13135	177.877	-213.472	1393.786	-2.5503	1.6665	-0.12256	NaN	NaN	NaN	NaN	NaN	NaN
0.31	56.725	140.132	934.165	-0.82959	0.64697	-0.1377	46.186	-74.802	903.5777	-0.54443	1.3696	-0.12842	191.971	-151.947	1348.68	-2.562	1.8071	-0.070801	NaN	NaN	NaN	NaN	NaN	NaN
0.312	47.599	132.178	911.603	-0.81738	0.63086	-0.12793	-10.803	-93.68	868.008	-0.5415	1.3784	-0.13257	220.482	-164.888	1371.496	-2.4961	1.834	-0.039063	NaN	NaN	NaN	NaN	NaN	NaN
0.314	56.524	141.219	894.9142	-0.7793	0.59766	-0.12305	13.3944	-141.5144	904.608	-0.51172	1.3828	-0.13965	187.1192	-63.19	1398.247	-2.25	1.7891	0.022949	NaN	NaN	NaN	NaN	NaN	NaN
0.316	35.9867	134.067	860.2221	-0.75391	0.57227	-0.1189	31.7105	-156.459	904.819	-0.44336	1.3711	-0.15332	153.189	-105.791	1418.078	-2.001	1.6982	0.057861	NaN	NaN	NaN	NaN	NaN	NaN
0.318	35.4872	127.38655	830.2075	-0.72803	0.55127	-0.11377	4.314	-215.0695	920.6056	-0.41602	1.3594	-0.16113	99.8572	-135.992	1395.89797	-1.7534	1.5942	0.076172	NaN	NaN	NaN	NaN	NaN	NaN
0.32	51.0714	127.547	807.0814	-0.69287	0.51709	-0.11133	33.687	-227.6976	979.414	-0.36572	1.3125	-0.18359	136.634	-216.004	1381.109	-1.4868	1.4692	0.11133	NaN	NaN	NaN	NaN	NaN	NaN
0.322	37.2152	131.601	787.058	-0.67871	0.50195	-0.10645	56.14	-211.5825	1004.2987	-0.33984	1.2747	-0.20093	125.68	-221.628	1357.979	-1.3926	1.4238	0.11377	NaN	NaN	NaN	NaN	NaN	NaN
0.324	27.0538	126.912	759.382	-0.63818	0.47412	-0.10059	6.86126	-241.707	1039.572	-0.32617	1.2324	-0.21533	172.309	-231.093	1392.8	-1.2495	1.3267	0.1167	NaN	NaN	NaN	NaN	NaN	NaN
0.326	6.173	116.079	744.9355	-0.61377	0.45362	-0.099121	20.7674	-243.031	1098.873	-0.31787	1.1743	-0.22607	159.143	-204.5875	1465.883	-1.1562	1.2529	0.11108	NaN	NaN	NaN	NaN	NaN	NaN
0.328	2.4442	132.4422	731.185	-0.5835	0.43213	-0.10059	1.009	-242.29	1127.2452	-0.32275	1.1367	-0.23828	157.579	-220.8806	1510.54945	-1.0723	1.1914	0.086914	NaN	NaN	NaN	NaN	NaN	NaN
0.33	-15.0187	153.83338	708.086	-0.54248	0.40088	-0.096191	-32.752	-252.061	1185.899	-0.32422	1.061	-0.26514	111.699	-221.8838	1553.1095	-0.95752	1.1011	0.05127	NaN	NaN	NaN	NaN	NaN	NaN
0.332	-23.8156	152.6463	691.125	-0.52295	0.38428	-0.097656	-28.4873	-183.5557	1204.658	-0.32422	1.0058	-0.29419	86.0378	-296.984	1570.6314	-0.90186	1.0562	0.037109	NaN	NaN	NaN	NaN	NaN	NaN
0.334	-40.22126	145.8914	651.1666	-0.48047	0.35449	-0.097168	-68.313	-172.66	1215.205	-0.33252	0.95654	-0.3208	43.899016	-324.532	1578.62224	-0.79541	0.96729	-0.0024414	NaN	NaN	NaN	NaN	NaN	NaN
0.336	-65.326	145.8204	599.222	-0.44996	0.32739	-0.10156	-45.244	-159.665	1256.94	-0.36182	0.93018	-0.35303	-12.638	-305.213	1614.948	-0.73828	0.90136	-0.046631	NaN	NaN	NaN	NaN	NaN	NaN
0.338	-47.604	137.3531	581.9598	-0.42188	0.30176	-0.09668	-21.6076	-133.957	1250.461	-0.38965	0.9375	-0.37012	-58.8738	-233.246	1624.205	-0.70361	0.84912	-0.10303	NaN	NaN	NaN	NaN	NaN	NaN
0.34	-51.614	134.7609	566.4484	-0.38525	0.26953	-0.097656	-16.1114	-164.322	1294.09369	-0.46045	1.0044	-0.37646	-59.742	-184.277	1624.0821	-0.7041	0.8125	-0.1792	NaN	NaN	NaN	NaN	NaN	NaN
0.342	-46.2063	134.9196	543.5336	-0.35669	0.25415	-0.097412	18.24945	-134.9225	1333.533	-0.53418	1.0883	-0.3728	-44.0949	-162.997	1637.384	-0.71826	0.81689	-0.20801	NaN	NaN	NaN	NaN	NaN	NaN
0.344	-33.5357	141.463	492.1307	-0.33252	0.23486	-0.096191	-6.51336	-114.559	1333.324	-0.62988	1.1934	-0.35352	6.823	-177.924	1646.031	-0.79492	0.8418	-0.24023	NaN	NaN	NaN	NaN	NaN	NaN
0.346	-13.372	144.8105	468.4013	-0.30273	0.21143	-0.09668	4.957	-140.721	1383.2184	-0.76025	1.3306	-0.34082	9.28283	-157.2907	1669.834	-0.86914	0.8706	-0.27099	NaN	NaN	NaN	NaN	NaN	NaN
0.348	-16.993	130.4	470.4691	-0.28857	0.19873	-0.099609	33.0073	-103.2565	1393.159	-0.82031	1.4023	-0.34473	24.5679	-100.207	1685.373	-0.96094	0.91797	-0.30615	NaN	NaN	NaN	NaN	NaN	NaN
0.35	-1.575	134.3213	447.7011	-0.26416	0.18311	-0.10107	3.433	-136.38	1416.646	-0.94824	1.5293	-0.3667	-11.658	-73.5249	1715.8022	-1.1313	1.0044	-0.36475	NaN	NaN	NaN	NaN	NaN	NaN
0.352	31.8517	136.8233	424.3347	-0.23804	0.17236	-0.099364	32.36478	-148.07	1456.555	-1.042	1.645	-0.39282	-27.3301	-47.284	1726.103	-1.2305	1.0586	-0.39941	NaN	NaN	NaN	NaN	NaN	NaN
0.354	25.218	137.18699	376.75979	-0.21875	0.15625	-0.098145	13.4	-119.2999	1444.6138	-1.1387	1.7617	-0.4248	-7.676	-95.4996	1747.099	-1.459	1.2012	-0.44336	NaN	NaN	NaN	NaN	NaN	NaN
0.356	18.6374	112.4072	367.1269	-0.19336	0.14307	-0.096191	-11.5115	-161.529	1506.989	-1.271	1.9146	-0.46045	-0.464	-108.289	1744.658	-1.6814	1.3723	-0.46167	NaN	NaN	NaN	NaN	NaN	NaN
0.358	14.028	96.0077	349.79077	-0.17578	0.13574	-0.095703	31.5638	-132.8084	1574.458	-1.3281	1.9863	-0.48047	-18.663	-151.412	1792.995	-1.9473	1.5762	-0.479	NaN	NaN	NaN	NaN	NaN	NaN
0.36	34.8332	99.2418	325.1181	-0.14941	0.11523	-0.094727	19.748	-115.082	1566.295	-1.4219	2.127	-0.49902	-26.0222	-114.552	1812.411	-2.3608	1.8755	-0.49365	NaN	NaN	NaN	NaN	NaN	NaN
0.362	29.594	114.24	312.5177	-0.13257	0.10303	-0.095703	16.265	-135.5686	1576.448	-1.4761	2.2183	-0.51807	-63.3985	-98.0445	1822.179	-2.5703	2.0078	-0.49512	NaN	NaN	NaN	NaN	NaN	NaN
0.364	53.254	107.58	290.2067	-0.11523	0.091309	-0.088867	43.5739	-79.29	1544.446	-1.5117	2.3047	-0.5376	-33.044	-44.558	1792.3032	-2.9336	2.2539	-0.46094	NaN	NaN	NaN	NaN	NaN	NaN
0.366	49.162	92.2996	259.4584	-0.10059	0.07666	-0.084473	6.4261	-95.332	1526.653	-1.5405	2.3911	-0.53857	13.419	-85.674	1782.5643	-3.1324	2.4292	-0.42431	NaN	NaN	NaN	NaN	NaN	NaN
0.368	52.41	93.1517	235.1228	-0.09375	0.06543	-0.084473	25.7183	-73.219	1554.6269	-1.5566	2.4141	-0.54297	52.6833	-69.069	1774.6599	-3.2378	2.5728	-0.38574	NaN	NaN	NaN	NaN	NaN	NaN
0.37	57.22	82.3063	216.4599	-0.081543	0.05127	-0.079102	25.83	-22.298	1545.69739	-1.5815	2.4497	-0.51514	85.441	-110.925	1790.003	-3.1909	2.647	-0.3335	NaN	NaN	NaN	NaN	NaN	NaN
0.372	46.663	81.1541	192.5808	-0.074219	0.041504	-0.076172	-18.389	-63.253	1553.0883	-1.5955	2.468	-0.48315	41.385	-27.0419	1746.714	-3.0972	2.6411	-0.29736	NaN	NaN	NaN	NaN	NaN	NaN
0.374	46.9366	82.2531	181.00443	-0.06543	0.034668	-0.071289	-6.145	-20.2003	1567.6695	-1.5952	2.4771	-0.44678	6.037	-2.592	1740.253	-2.7769	2.5103	-0.15283	NaN	NaN	NaN	NaN	NaN	NaN
0.376	35.0382	81.93872	157.08854	-0.052246	0.020996	-0.068848	-17.789	9.3741	1534.875	-1.5713	2.4648	-0.41992	-5.047	74.448	1711.4521	-2.8521	2.5307	-0.38965	NaN	NaN	NaN	NaN	NaN	NaN
0.378	17.1518	72.1531	165.1902	-0.047852	0.018555	-0.064453	-46.519	2.741	1567.7254	-1.5449	2.4473	-0.40625	17.227	36.546	1696.161	-2.7285	2.5273	-0.44727	NaN	NaN	NaN	NaN	NaN	NaN
0.38	-4.988	66.3127	165.2597	-0.036133	0.0097656	-0.0625	-26.899	62.5375	1574.2906	-1.4585	2.3833	-0.38525	17.518	87.574	1669.204	-2.4893	2.4551	-0.30615	NaN	NaN	NaN	NaN	NaN	NaN
0.382	-17.1591	79.907	153.6102	-0.028565	0.0070801	-0.059326	-60.2246	43.3954	1566.481	-1.3862	2.3052	-0.37402	4.938	61.375	1657.233	-2.4063	2.3711	-0.24854	NaN	NaN	NaN	NaN	NaN	NaN
0.384	-17.7227	81.761	132.1655	-0.01709	0.0043945	-0.057129	-85.975	12.9721	1596.90622	-1.3081	2.2114	-0.36768	-14.54	132.563	1659.755	-2.2573	2.2173	-0.18262	NaN	NaN	NaN	NaN	NaN	NaN
0.386	-47.36	61.448	109.5923	-0.0043945	0.0078125	-0.052734	-60.9287	16.7376	1576.816	-1.2144	2.0786	-0.37354	-79.584	73.203	1678.384	-2.1402	2.1118	-0.19067	NaN	NaN	NaN	NaN	NaN	NaN
0.388	-41.3134	49.971	98.944	0	0.0087891	-0.043457	-75.7015	-38.6436	1586.1479	-1.1772	2.0161	-0.37939	-79.18	97.581	1665.3126	-2.0313	1.9785	-0.19873	NaN	NaN	NaN	NaN	NaN	NaN
0.39	-35.658	52.3867	71.459	0.0063477	0.0087891	-0.042969	-37.328	-6.433	1596.691	-1.125	1.9004	-0.38379	-73.7839	23.6466	1660.0711	-1.9214	1.7876	-0.20068	NaN	NaN	NaN	NaN	NaN	NaN
0.392	-26.3023	33.211	85.4653	0.010742	0.0097656	-0.030762	-57.6427	7.932	1571.1	-1.0986	1.8359	-0.39697	-44.756	68.08	1600.437	-1.8638	1.6997	-0.18652	NaN	NaN	NaN	NaN	NaN	NaN
0.394	-24.1641	34.927	74.39	0.01709	0.0087891	-0.021484	-66.4083	-6.835	1596.239	-1.084	1.7871	-0.40332	-23.262	48.858	1577.081	-1.7705	1.5488	-0.1665	NaN	NaN	NaN	NaN	NaN	NaN
0.396	-34.3745	33.114	68.50911	0.014648	0.012695	-0.016113	-34.926	55.5799	1580.783	-1.0762	1.7363	-0.41113	-63.8632	142.7192	1566.6718	-1.726	1.4746	-0.17334	NaN	NaN	NaN	NaN	NaN	NaN
0.398	-20.3947	43.327	64.6635	0.016602	0.012695	-0.012695	-77.467	41.4528	1543.5436	-1.0776	1.7134	-0.41162	-65.622	127.637	1587.664	-1.6914	1.4238	-0.1958	NaN	NaN	NaN	NaN	NaN	NaN
0.4	-24.1199	49.32128	52.9707	0.0087891	0.0097656	-0.00097656	-37.232	53.302	1543.91	-1.0874	1.688	-0.41113	-65.564	175.32	1549.285	-1.6631	1.375	-0.21191	NaN	NaN	NaN	NaN	NaN	NaN
0.402	-7.021	49.209	65.795	0.011719	0.0058594	0.0070801	-49.448	111.916	1509.1445	-1.0937	1.6719	-0.40699	-5.5329	113.138	1551.447	-1.6504	1.3555	-0.21582	NaN	NaN	NaN	NaN	NaN	NaN
0.404	0.145999999999999	56.044	54.552	0.0073242	0.003418	0.0087891	-65.2492	84.5657	1508.6032	-1.0938	1.6641	-0.40332	-15.07	151.657	1504.8258	-1.6265	1.3267	-0.20557	NaN	NaN	NaN	NaN	NaN	NaN
0.406	18.231	38.222	45.2077	0.0014648	-0.0024414	0.018555	-29.837	126.231	1491.5633	-1.082	1.6484	-0.39746	-2.714	132.9698	1476.22	-1.6084	1.3037	-0.20191	NaN	NaN	NaN	NaN	NaN	NaN
0.408	-11.1321	25.849	38.0306	-0.0039063	-0.0063477	0.025391	-41.4726	126.99	1463.04066	-1.0742	1.6348	-0.396	-6.445	222.952	1418.22304	-1.5762	1.2813	-0.19531	NaN	NaN	NaN	NaN	NaN	NaN
0.41	1.299	23.4055	27.8144	-0.0053711	-0.01709	0.032715	-24.275	103.5783	1474.48	-1.0547	1.6055	-0.39453	-29.797	217.894	1380.228	-1.5264	1.25	-0.19141	NaN	NaN	NaN	NaN	NaN	NaN
0.412	24.71557	25.5989	34.5112	-0.013916	-0.023925	0.034668	21.371	154.889	1446.96	-1.0317	1.5806	-0.39502	-25.0108	249.297	1346.8683	-1.498	1.2344	-0.18457	NaN	NaN	NaN	NaN	NaN	NaN
0.414	39.2001	28.965	41.5281	-0.018555	-0.02832	0.038574	-12.396	145.462	1419.6189	-1.0195	1.5586	-0.38867	13.8335	171.34	1329.328	-1.4351	1.1978	-0.17041	NaN	NaN	NaN	NaN	NaN	NaN
0.416	35.2293	18.24732	26.4251	-0.02002	-0.024414	0.036621	7.104	142.42955	1410.095	-1.0054	1.522	-0.37549	40.03	190.065	1271.342	-1.3904	1.1682	-0.16162	NaN	NaN	NaN	NaN	NaN	NaN
0.418	70.723	16.9833	16.5586	-0.017578	-0.024902	0.039551	35.8594	156.237	1384.946	-1.0015	1.5024	-0.38037	56.097	188.78	1205.4496	-1.3359	1.1328	-0.14941	NaN	NaN	NaN	NaN	NaN	NaN
0.42	76.178	19.2338	20.1824	-0.016602	-0.025391	0.033203	-4.212	95.049	1382.5366	-0.98193	1.4751	-0.36426	58.566	261.795	1166.318	-1.2554	1.0903	-0.14111	NaN	NaN	NaN	NaN	NaN	NaN
0.422	35.45038	18.386	25.407	-0.011719	-0.020996	0.031006	28.132	112.314	1375.271	-0.96216	1.4453	-0.36255	74.865	241.2738	1152.1255	-1.2144	1.0708	-0.14307	NaN	NaN	NaN	NaN	NaN	NaN
0.424	37.2724	10.3672	33.528	-0.0043945	-0.022461	0.023926	3.383	120.058	1350.5185	-0.93311	1.4126	-0.35303	88.586	258.752	1125.007	-1.1289	1.0293	-0.12939	NaN	NaN	NaN	NaN	NaN	NaN
0.426	33.3545	5.5155	31.5186	0.0068359	-0.015137	0.017578	-31.0161	114.924	1329.552	-0.89014	1.3638	-0.35107	91.977	218.001	1075.238	-1.0396	0.98291	-0.12256	NaN	NaN	NaN	NaN	NaN	NaN
0.428	27.2305	11.5522	20.67949	0.01416	-0.018555	0.013184	7.2074	159.879	1298.563	-0.85473	1.3252	-0.35034	99.614	254.234	1019.64388	-0.99805	0.95898	-0.11914	NaN	NaN	NaN	NaN	NaN	NaN
0.43	15.483	5.3638	24.90086	0.026367	-0.015137	0.0058594	-16.4337	169.4463	1251.0793	-0.81689	1.2876	-0.34619	94.586	257.4473	983.2841	-0.90381	0.89502	-0.11523	NaN	NaN	NaN	NaN	NaN	NaN
0.432	-14.76	9.0613	31.3465	0.036132	-0.013428	-0.003418	7.617	178.9012	1245.523	-0.76709	1.2329	-0.34033	49.519	309.653	930.7269	-0.83325	0.83716	-0.11036	NaN	NaN	NaN	NaN	NaN	NaN
0.434	1.506	17.3069	33.47	0.047852	-0.010742	-0.013672	25.3628	206.284	1214.447	-0.74121	1.2051	-0.3418	30.934	311.404	891.8685	-0.76172	0.77539	-0.10449	NaN	NaN	NaN	NaN	NaN	NaN
0.436	-10.187	25.02	14.5958	0.054688	-0.0087891	-0.019043	4.7542	178.735	1188.27745	-0.69727	1.1572	-0.33057	43.855	303.4861	823.988	-0.67432	0.69531	-0.11035	NaN	NaN	NaN	NaN	NaN	NaN
0.438	-26.2334	7.49095	3.718	0.058594	-0.0048828	-0.023438	15.5834	195.9528	1167.5432	-0.66333	1.1203	-0.33252	61.646	243.9759	792.813	-0.63477	0.6543	-0.1084	NaN	NaN	NaN	NaN	NaN	NaN
0.44	-32.1678	0.9977	3.88605	0.060547	-0.0029297	-0.032227	9.78528	205.6002	1120.77	-0.63037	1.085	-0.32715	76.277	238.36	759.3485	-0.56396	0.58057	-0.10693	NaN	NaN	NaN	NaN	NaN	NaN
0.442	-8.495	-4.32	14.4476	0.063965	-0.0019531	-0.03833	17.9353	198.867	1097.1636	-0.59961	1.0439	-0.30908	56.123	244.5565	726.714	-0.52344	0.53442	-0.10816	NaN	NaN	NaN	NaN	NaN	NaN
0.444	-16.599	0.574000000000002	1.407	0.066406	0.00048828	-0.050781	13.51732	225.597	1062.9261	-0.57764	1.0181	-0.30615	28.6606	302.6045	656.3202	-0.4834	0.48242	-0.11133	NaN	NaN	NaN	NaN	NaN	NaN
0.446	-58.1171	1.741	10.511311	0.075195	0.0039063	-0.064453	-18.4784	223.677	1019.265	-0.54053	0.97119	-0.29932	1.731	320.806	570.902	-0.42676	0.41943	-0.11523	NaN	NaN	NaN	NaN	NaN	NaN
0.448	-22.35612	2.4609	21.8333	0.076172	0.0048828	-0.068848	10.4699	208.7008	1000.9062	-0.50561	0.93042	-0.28881	6.6176	314.5728	524.118	-0.39893	0.38867	-0.11523	NaN	NaN	NaN	NaN	NaN	NaN
0.45	-27.3919	5.5319	23.6746	0.088867	0.012695	-0.083496	14.9256	238.434	970.2632	-0.46826	0.88721	-0.28662	10.1359	266.4734	495.07	-0.33301	0.33594	-0.12305	NaN	NaN	NaN	NaN	NaN	NaN
0.452	-45.73854	8.0954	12.7149	0.10083	0.016846	-0.092041	-16.0582	221.663295	949.3056	-0.41895	0.81836	-0.27637	6.5238	246.655	476.4801	-0.28515	0.29834	-0.12744	NaN	NaN	NaN	NaN	NaN	NaN
0.454	-49.8467	-0.17368	11.00746	0.11084	0.023926	-0.1001	47.941	215.25314	947.219	-0.38867	0.78613	-0.27441	-17.2561	247.827	434.3316	-0.23633	0.25439	-0.12793	NaN	NaN	NaN	NaN	NaN	NaN
0.456	0.933999999999997	8.9594	18.8282	0.11816	0.02832	-0.11328	24.672	222.1797	898.2518	-0.33447	0.71826	-0.26611	-12.0279	260.968	408.721	-0.17236	0.19971	-0.1377	NaN	NaN	NaN	NaN	NaN	NaN
0.458	-9.816	8.3807	14.1649	0.12061	0.035645	-0.11768	29.438	194.663	867.614	-0.28858	0.66797	-0.25879	-35.587	245.846	370.8875	-0.13965	0.16748	-0.14502	NaN	NaN	NaN	NaN	NaN	NaN
0.46	-13.2	-0.0891000000000002	0.3074	0.125	0.04541	-0.11621	68.018	216.8097	822.767	-0.25	0.61719	-0.25586	-13.5142	233.688	345.307	-0.083008	0.11328	-0.15186	NaN	NaN	NaN	NaN	NaN	NaN
0.462	7.579	-0.9863	2.7891	0.12452	0.047363	-0.12182	48.531	217.694	769.6946	-0.19482	0.55713	-0.25244	-2.091	194.784	272.537	-0.045898	0.076172	-0.15576	NaN	NaN	NaN	NaN	NaN	NaN
0.464	50.392	11.0422	12.5748	0.12842	0.046875	-0.13281	57.592	208.07	751.1	-0.17676	0.53125	-0.24707	38.0544	166.4342	228.1512	-0.015625	0.041504	-0.1626	NaN	NaN	NaN	NaN	NaN	NaN
0.466	51.857	11.917	22.0263	0.125	0.049805	-0.14307	65.42	230.2794	682.8635	-0.13721	0.4751	-0.23047	21.481156	140.7522	186.861	0.010254	-6.0716e-14	-0.16113	NaN	NaN	NaN	NaN	NaN	NaN
0.468	9.808	2.2044	1.55662	0.12305	0.049805	-0.14502	29.071	207.663	639.2108	-0.1167	0.43554	-0.2207	11.0387	117.162	186.8201	0.017578	-0.01709	-0.16455	NaN	NaN	NaN	NaN	NaN	NaN
0.47	46.6755	1.7549	2.1824	0.12695	0.053711	-0.15918	67.693	205.0484	618.64656	-0.097656	0.39893	-0.2085	-8.017	95.288	141.5601	0.022949	-0.050781	-0.16406	NaN	NaN	NaN	NaN	NaN	NaN
0.472	70.397	22.7709	22.0798	0.12744	0.05542	-0.16528	44.592	236.394	585.8599	-0.083496	0.35791	-0.19189	20.0632	81.918	116.7743	0.0073241	-0.061279	-0.16724	NaN	NaN	NaN	NaN	NaN	NaN
0.474	36.7575	11.4542	14.889	0.1333	0.059082	-0.17676	35.869	221.246	555.293	-0.074707	0.33887	-0.19043	38.0827	68.33	61.80614	-0.015625	-0.077148	-0.1626	NaN	NaN	NaN	NaN	NaN	NaN
0.476	3.611	-1.0116	-6.443	0.14014	0.067871	-0.18799	81.499	223.142	508.31957	-0.062988	0.30029	-0.1748	39.724	57.308	86.134	-0.038086	-0.088379	-0.16064	NaN	NaN	NaN	NaN	NaN	NaN
0.478	57.95	0.411899999999999	5.4282	0.13819	0.075195	-0.19824	22.9717	219.638	462.2203	-0.058105	0.27124	-0.16065	47.5457	73.53	76.962	-0.056152	-0.091309	-0.1626	NaN	NaN	NaN	NaN	NaN	NaN
0.48	60.935	0.1262	44.5433	0.14307	0.08252	-0.20947	29.54	188.73271	434.89605	-0.056152	0.24951	-0.15479	29.523	77.553	73.919	-0.080566	-0.085449	-0.16455	NaN	NaN	NaN	NaN	NaN	NaN
0.482	0.555999999999999	-14.97164	53.753	0.13379	0.09082	-0.23486	56.246	214.765	396.251	-0.049805	0.21484	-0.14941	29.035	79.979	18.3624	-0.10254	-0.077148	-0.16821	NaN	NaN	NaN	NaN	NaN	NaN
0.484	1.114	-26.4704	85.1787	0.12891	0.099121	-0.24268	17.2684	202.6167	352.2638	-0.04541	0.19922	-0.14453	45.8832	41.856	25.39	-0.11279	-0.074219	-0.17236	NaN	NaN	NaN	NaN	NaN	NaN
0.486	49.0921	1.0842	147.4337	0.096191	0.12207	-0.25732	51.853	163.9977	333.123	-0.043457	0.1748	-0.14014	29.371	2.219	-8.172	-0.13477	-0.063477	-0.17822	NaN	NaN	NaN	NaN	NaN	NaN
0.488	24.0986	37.987	177.599	0.043946	0.14404	-0.26587	6.40253	161.9031	291.3926	-0.045899	0.15942	-0.13599	35.22	-11.5705	-3.123	-0.13379	-0.059082	-0.18359	NaN	NaN	NaN	NaN	NaN	NaN
0.49	9.9734	37.8486	249.72	-0.032227	0.17432	-0.27637	-2.0091	125.349	275.5623	-0.049805	0.1416	-0.13721	17.201	5.191	-52.683	-0.13818	-0.055664	-0.19287	NaN	NaN	NaN	NaN	NaN	NaN
0.492	20.569	14.9145	333.835	-0.15918	0.22314	-0.30078	41.225	145.8567	260.773	-0.062012	0.12891	-0.13037	-0.118600000000001	15.254	-18.31257	-0.14185	-0.056397	-0.20313	NaN	NaN	NaN	NaN	NaN	NaN
0.494	76.7553	23.941279	442.382	-0.23975	0.24854	-0.31152	-5.17003	164.1059	231.22	-0.066406	0.12842	-0.12891	-24.23	17.337	-16.587	-0.14893	-0.060547	-0.20898	NaN	NaN	NaN	NaN	NaN	NaN
0.496	70.696	51.4525	573.606	-0.43262	0.31543	-0.31787	8.52263	109.059	209.363	-0.079102	0.12012	-0.11963	-15.834	1.217	28.2701	-0.16699	-0.061523	-0.21973	NaN	NaN	NaN	NaN	NaN	NaN
0.498	25.795	26.28407	689.63334	-0.61254	0.38818	-0.32715	-1.4554	110.367	186.1925	-0.082031	0.11475	-0.12037	-25.337	21.435	-18.3918	-0.1792	-0.064941	-0.22266	NaN	NaN	NaN	NaN	NaN	NaN
0.5	-3.8951	15.4226	784.33782	-0.82178	0.48193	-0.34326	-19.8344	95.393	149.11592	-0.083008	0.10938	-0.12109	-13.965	30.0145	-13.1414	-0.21045	-0.067383	-0.2207	NaN	NaN	NaN	NaN	NaN	NaN
0.502	5.08	6.009	869.5825	-1.1445	0.63672	-0.35059	26.5396	71.607	152.324	-0.072754	0.10254	-0.12256	-3.411	42.7412	5.47	-0.24487	-0.062256	-0.21387	NaN	NaN	NaN	NaN	NaN	NaN
0.504	-37.057	-29.148	920.8077	-1.3242	0.73047	-0.34961	17.0728	101.0909	122.5724	-0.063477	0.096191	-0.12451	-59.491	32.117	55.2238	-0.27979	-0.052246	-0.21289	NaN	NaN	NaN	NaN	NaN	NaN
0.506	-77.717	-42.066	978.1197	-1.6851	0.90967	-0.33838	4.18353	73.618	104.544	-0.041504	0.086426	-0.1333	-51.745	54.4966	22.128	-0.34229	-0.036621	-0.20703	NaN	NaN	NaN	NaN	NaN	NaN
0.508	-66.62	-27.049	1064.798	-1.9431	1.051	-0.3313	40.352	78.9965	85.7194	-0.01416	0.083008	-0.13916	-51.763	46.929	14.064	-0.36572	-0.021973	-0.20068	NaN	NaN	NaN	NaN	NaN	NaN
0.51	-55.641	-20.73591	1112.005	-2.166	1.2148	-0.32031	8.8031	93.9748	51.41	0.011719	0.073242	-0.14111	-40.522	46.2054	0.2218	-0.41699	0.01416	-0.19385	NaN	NaN	NaN	NaN	NaN	NaN
0.512	-90.539	-54.074	1106.677	-2.3784	1.4771	-0.28271	34.134	47.79	51.7422	0.032227	0.060059	-0.14307	-60.8783	29.384	41.5719	-0.44312	0.039551	-0.18066	NaN	NaN	NaN	NaN	NaN	NaN
0.514	-91.048	-104.65	1107.7778	-2.4512	1.6211	-0.2627	44.31	60.687	53.7317	0.039551	0.054688	-0.14404	-48.834	52.5799	19.59	-0.45703	0.067383	-0.16699	NaN	NaN	NaN	NaN	NaN	NaN
0.516	-58.741	-123.984	1119.679	-2.5293	1.8965	-0.23779	19.2101	29.5252	44.6955	0.048828	0.035645	-0.15039	-59.983	31.463	13.5031	-0.4624	0.094727	-0.13818	NaN	NaN	NaN	NaN	NaN	NaN
0.518	-23.982	-100.132	1138.751	-2.4907	2.0249	-0.2295	53.133	-3.4021	49.269	0.05249	0.023193	-0.14892	-34.953	33.1576	-14.9648	-0.45605	0.10596	-0.12695	NaN	NaN	NaN	NaN	NaN	NaN
0.52	-7.85	-61.2379	1133.105	-2.3193	2.0332	-0.19141	10.6571	35.64	11.1209	0.053223	0.014648	-0.14453	-34.5811	-11.9524	37.5707	-0.43018	0.125	-0.10742	NaN	NaN	NaN	NaN	NaN	NaN
0.522	-54.529	-51.826	1102.693	-2.2773	1.9395	-0.41992	20.3094	-1.1146	7.49565	0.048828	0.0097656	-0.14746	-11.529	-7.6447	33.4436	-0.40112	0.13135	-0.094238	NaN	NaN	NaN	NaN	NaN	NaN
0.524	-52.621	-38.7	1057.9534	-2.1499	1.8735	-0.51416	50.861	2.7204	17.71732	0.045898	0.0087891	-0.14307	3.727	4.0525	33.9912	-0.36035	0.13037	-0.070313	NaN	NaN	NaN	NaN	NaN	NaN
0.526	-58.241	-32.904	1036.094	-1.7437	1.6001	-0.51611	5.808	21.376	-3.74829	0.041016	0.0078125	-0.13525	28.473	36.707	17.6297	-0.29688	0.11768	-0.061523	NaN	NaN	NaN	NaN	NaN	NaN
0.528	-68.291	-34.451	1043.9462	-1.4859	1.3423	-0.45752	35.8763	-12.9998	12.9443	0.036133	0.012695	-0.1289	-10.9707	21.965	40.839	-0.25781	0.11035	-0.054688	NaN	NaN	NaN	NaN	NaN	NaN
0.53	-70.238	-53.498	1053.6907	-1.2866	1.1353	-0.43896	43.891	4.0709	0.0620000000000012	0.039551	0.013672	-0.12207	6.582	30.861	52.959	-0.17969	0.083496	-0.047852	NaN	NaN	NaN	NaN	NaN	NaN
0.532	-84.4922	-82.851	1053.59	-1.0854	0.9624	-0.46143	5.9669	-14.7147	1.33341	0.047363	0.016602	-0.11279	16.934	3.724	50.994	-0.12182	0.062989	-0.039551	NaN	NaN	NaN	NaN	NaN	NaN
0.534	-74.7809	-99.85	1025.8516	-1.0093	0.89893	-0.48193	35.01267	-39.506	22.287	0.05127	0.01416	-0.10547	37.644	6.8968	9.6869	-0.068848	0.038574	-0.033691	NaN	NaN	NaN	NaN	NaN	NaN
0.536	-75.228	-122.2942	1021.22	-0.86475	0.82275	-0.51025	11.577	8.8618	-2.948	0.062012	0.0083008	-0.095703	38.1379	-19.5748	5.2738	-0.0087891	0.01123	-0.023926	NaN	NaN	NaN	NaN	NaN	NaN
0.538	-39.773	-144.41503	1031.7793	-0.76563	0.77002	-0.50098	5.1279	-0.157999999999999	-12.293	0.066163	0.0061035	-0.088379	41.2491	-19.7663	10.3263	0.017578	-0.0048828	-0.018555	NaN	NaN	NaN	NaN	NaN	NaN
0.54	-22.474	-167.9444	1060.4082	-0.66211	0.70898	-0.49219	28.3048	0.6113	-4.6168	0.073242	0.0083008	-0.07373	8.144	-34.3195	5.8031	0.071289	-0.032715	-0.020508	NaN	NaN	NaN	NaN	NaN	NaN
0.542	-19.2942	-183.205	1077.9495	-0.54883	0.64355	-0.47852	-37.3658	29.422	-10.5262	0.083984	-0.0053711	-0.058594	28.16	10.032	-21.1553	0.10938	-0.060302	-0.017334	NaN	NaN	NaN	NaN	NaN	NaN
0.544	8.947	-198.499	1096.1057	-0.49268	0.61572	-0.47754	-6.518	-9.1573	3.4694	0.08252	-0.0048828	-0.050293	10.334	12.1857	-31.748	0.14844	-0.083008	-0.01709	NaN	NaN	NaN	NaN	NaN	NaN
0.546	-19.4809	-215.17	1143.3319	-0.41309	0.54639	-0.47559	5.805	18.2666	14.4927	0.082031	-0.0087891	-0.032227	11.01	24.6382	-6.2638	0.2002	-0.10791	-0.021973	NaN	NaN	NaN	NaN	NaN	NaN
0.548	21.1646	-214.325	1157.373	-0.37134	0.49951	-0.46192	-35.852	17.5756	-7.5434	0.086915	-0.01001	-0.020508	8.469	7.5133	19.1185	0.22266	-0.12646	-0.015625	NaN	NaN	NaN	NaN	NaN	NaN
0.55	24.3775	-215.268	1151.2905	-0.34668	0.46045	-0.45068	2.7676	-15.4928	-2.6458	0.088867	-0.01123	-0.0068359	-1.191	27.6918	17.3686	0.26074	-0.15576	-0.021484	NaN	NaN	NaN	NaN	NaN	NaN
0.552	52.14	-200.348	1131.7274	-0.33984	0.41943	-0.42529	-22.2359	22.805	-29.768	0.094238	-0.030762	0.0024414	-29.2514	20.4947	-2.3531	0.28101	-0.17041	-0.024903	NaN	NaN	NaN	NaN	NaN	NaN
0.554	-3.64287	-193.2	1151.6185	-0.35107	0.40088	-0.42529	-24.5273	2.565	-5.1657	0.098145	-0.038574	0.0078125	-27.0891	30.9887	-2.0685	0.29297	-0.1875	-0.031738	NaN	NaN	NaN	NaN	NaN	NaN
0.556	2.4362	-174.627	1172.5519	-0.3916	0.37305	-0.44336	15.834	9.4175	10.8019	0.11035	-0.050781	0.01123	-53.0692	7.072	-6.34	0.29688	-0.20703	-0.035156	NaN	NaN	NaN	NaN	NaN	NaN
0.558	55.178	-157.084	1202.1656	-0.43774	0.36646	-0.47046	-16.7806	32.41319	-1.861252	0.11841	-0.062012	0.016846	-36.443	17.433	11.599	0.2937	-0.21436	-0.040527	NaN	NaN	NaN	NaN	NaN	NaN
0.56	54.017	-149.659	1245.1991	-0.50391	0.38281	-0.47949	-5.7418	-16.1603	17.3761	0.12598	-0.07373	0.020996	-22.476	11.142	-23.8219	0.28809	-0.22363	-0.041992	NaN	NaN	NaN	NaN	NaN	NaN
0.562	74.529	-163.289	1283.8	-0.62646	0.43506	-0.48975	7.9978	14.6321	6.9364	0.13818	-0.084961	0.016602	-45.7589	24.0398	0.289	0.27783	-0.22412	-0.04541	NaN	NaN	NaN	NaN	NaN	NaN
0.564	82.19	-158.258	1274.713	-0.70068	0.479	-0.48584	-15.5015	26.7639	-1.9115	0.1438	-0.088135	0.015869	-57.411	23.2565	7.542	0.27002	-0.22412	-0.048828	NaN	NaN	NaN	NaN	NaN	NaN
0.566	89.472	-135.778	1275.828	-0.87891	0.60156	-0.4624	25.6919	7.10882	16.4929	0.14893	-0.092285	0.012695	-55.01	36.7165	39.269	0.24805	-0.22314	-0.042969	NaN	NaN	NaN	NaN	NaN	NaN
0.568	56.702	-126.982	1286.5515	-1.0278	0.70581	-0.45484	14.185	38.278	4.3729	0.14697	-0.099121	0.0092773	-50.152	42.0525	10.1715	0.2395	-0.21948	-0.045166	NaN	NaN	NaN	NaN	NaN	NaN
0.57	56.481	-140.0553	1322.008	-1.1704	0.82373	-0.4585	16.1475	-12.8393	3.178	0.14551	-0.09668	0.0058594	-46.7207	38.5519	-1.639	0.22949	-0.20947	-0.047363	NaN	NaN	NaN	NaN	NaN	NaN
0.572	83.518	-160.419	1340.204	-1.3296	1.0103	-0.48779	50.6191	-19.4648	12.5888	0.13965	-0.10205	-0.0039063	-13.316	24.3274	-8.469	0.21289	-0.19092	-0.04541	NaN	NaN	NaN	NaN	NaN	NaN
0.574	82.376	-174.703	1372.495	-1.4053	1.1074	-0.50391	-16.09766	27.8474	-15.8231	0.13598	-0.096436	-0.0092775	-27.3432	19.7944	41.566	0.20654	-0.18213	-0.047852	NaN	NaN	NaN	NaN	NaN	NaN
0.576	61.994	-184.465	1378.8653	-1.5337	1.2778	-0.53857	52.399	1.4978	17.2528	0.13086	-0.09375	-0.013672	-24.52	30.33045	33.6965	0.19531	-0.16016	-0.050293	NaN	NaN	NaN	NaN	NaN	NaN
0.578	27.41849	-174.938	1384.3611	-1.613	1.3733	-0.56616	52.4779	28.079	25.0609	0.12793	-0.086914	-0.02002	-14.759	53.154	32.2564	0.18432	-0.14404	-0.053711	NaN	NaN	NaN	NaN	NaN	NaN
0.58	68.416	-159.658	1404.127	-1.6851	1.4517	-0.58936	-4.033	33.58794	0.205100000000001	0.12598	-0.077637	-0.023926	-4.358	57.655	11.68	0.17285	-0.125	-0.053223	NaN	NaN	NaN	NaN	NaN	NaN
0.582	61.791	-134.4659	1407.79	-1.7813	1.5215	-0.59131	43.1551	-9.10061	23.264	0.12305	-0.066406	-0.028809	15.323	41.97	33.532	0.16748	-0.11621	-0.052734	NaN	NaN	NaN	NaN	NaN	NaN
0.584	41.7985	-136.393	1403.1412	-1.8262	1.5508	-0.59668	14.3837	22.171	-2.0756	0.12744	-0.055664	-0.039063	13.422	25.5962	16.2118	0.15869	-0.11035	-0.055664	NaN	NaN	NaN	NaN	NaN	NaN
0.586	50.764	-142.0113	1407.705	-1.9272	1.604	-0.6001	24.6769	-14.93957	10.8555	0.13428	-0.046875	-0.047852	16.175	8.383	30.5453	0.1582	-0.10352	-0.057617	NaN	NaN	NaN	NaN	NaN	NaN
0.588	48.7255	-129.22694	1399.932	-2.0076	1.632	-0.61255	18.464	-21.64851	33.19	0.14941	-0.037109	-0.058105	31.088	6.5522	4.2816	0.14355	-0.099855	-0.06958	NaN	NaN	NaN	NaN	NaN	NaN
0.59	60.092	-114.758	1407.2717	-2.0762	1.6777	-0.62939	-14.0323	14.85587	7.9882	0.15723	-0.034668	-0.067383	25.1398	-10.8171	41.9756	0.12939	-0.087891	-0.076172	NaN	NaN	NaN	NaN	NaN	NaN
0.592	28.1938	-101.89	1403.7833	-2.1323	1.729	-0.65283	16.938	-20.4525	5.7024	0.17725	-0.026855	-0.084961	25.184	-12.6827	22.2646	0.11084	-0.067871	-0.089355	NaN	NaN	NaN	NaN	NaN	NaN
0.594	43.0467	-94.724	1392.79338	-2.1348	1.7402	-0.66309	32.29037	2.5381	5.5052	0.19238	-0.027344	-0.095945	10.232	-19.2093	26.2429	0.10498	-0.054688	-0.090332	NaN	NaN	NaN	NaN	NaN	NaN
0.596	34.5468	-69.5158	1388.484	-2.0757	1.7407	-0.66162	-23.685137	13.557	1.76187	0.20752	-0.022949	-0.104	47.878	13.5566	-13.5919	0.083496	-0.01709	-0.10254	NaN	NaN	NaN	NaN	NaN	NaN
0.598	50.139	-45.558	1383.13	-1.993	1.7093	-0.65942	6.223	-21.2805	25.3563	0.22266	-0.021973	-0.11377	10.125	5.882	10.6456	0.066406	0.00708	-0.10181	NaN	NaN	NaN	NaN	NaN	NaN
0.6	58.705	-61.1	1411.755	-1.9077	1.6626	-0.66895	-9.96	29.049	20.366	0.23047	-0.020508	-0.12256	8.714	16.4444	26.8328	0.048828	0.022461	-0.10059	NaN	NaN	NaN	NaN	NaN	NaN
0.602	80.495	-67.597	1444.6377	-1.7852	1.5801	-0.67969	-9.7322	-9.1437	5.22136	0.23584	-0.020508	-0.13379	-18.3914	-3.77	43.3738	0.034668	0.043945	-0.10156	NaN	NaN	NaN	NaN	NaN	NaN
0.604	70.704	-70.643	1446.6124	-1.728	1.5396	-0.6792	9.142	-27.3753	7.94101	0.23462	-0.016113	-0.14332	-13.914	12.701	2.893	0.027344	0.052246	-0.10498	NaN	NaN	NaN	NaN	NaN	NaN
0.606	50.1466	-76.4858	1430.3411	-1.646	1.4575	-0.67139	-42.8584	5.953	-1.6385	0.23828	-0.0014648	-0.1543	-19.5282	-10.1667	-5.478	-0.0024414	0.075195	-0.10498	NaN	NaN	NaN	NaN	NaN	NaN
0.608	56.751	-100.313	1429.9201	-1.6065	1.4141	-0.66651	-5.311	-33.001	7.8038	0.22998	0.014648	-0.16016	-8.268	4.929	-6.5288	-0.021729	0.089111	-0.10767	NaN	NaN	NaN	NaN	NaN	NaN
0.61	71.051	-93.741	1425.2388	-1.5835	1.3716	-0.67627	2.884	7.5718	-11.2955	0.22412	0.024902	-0.16064	-33.046	-6.9968	14.4972	-0.036621	0.10059	-0.10791	NaN	NaN	NaN	NaN	NaN	NaN
0.612	93.261	-59.9932	1431.742	-1.5762	1.3252	-0.6582	-25.526	25.7058	-17.1243	0.20654	0.055176	-0.16504	-21.308	33.418	-15.4094	-0.057617	0.10791	-0.11084	NaN	NaN	NaN	NaN	NaN	NaN
0.614	83.567	-43.74391	1417.46	-1.5723	1.2969	-0.64697	14.4625	-22.562	6.0478	0.1958	0.080322	-0.16553	-41.02377	22.6063	-20.5581	-0.063965	0.11377	-0.11768	NaN	NaN	NaN	NaN	NaN	NaN
0.616	81.235	-39.9926	1429.313	-1.5703	1.2754	-0.64014	-16.207	17.3048	-12.8431	0.17969	0.10693	-0.17529	-50.8861	46.8288	10.3789	-0.069336	0.11914	-0.12939	NaN	NaN	NaN	NaN	NaN	NaN
0.618	79.108	-37.8193	1416.4729	-1.5522	1.2534	-0.63232	25.4879	-11.7868	-1.8681	0.16309	0.14355	-0.18115	-43.2932	-36.69145	75.8056	-0.072754	0.12231	-0.1355	NaN	NaN	NaN	NaN	NaN	NaN
0.62	73.146	-32.03	1414.687	-1.541	1.2441	-0.62793	31.5107	-19.5298524	-5.7483	0.14746	0.15674	-0.18799	-41.306	-28.208	118.42878	-0.070313	0.12158	-0.14404	NaN	NaN	NaN	NaN	NaN	NaN
0.622	96.739	-19.8752	1405.805	-1.521	1.2407	-0.61816	-9.4512	26.8524	-18.9932	0.12305	0.18262	-0.21533	-58.2421	-10.6278	175.314	-0.067871	0.12305	-0.1709	NaN	NaN	NaN	NaN	NaN	NaN
0.624	76.774	5.205	1395.5691	-1.5066	1.2371	-0.61303	24.3483	-25.134	9.4933	0.099366	0.2146	-0.23023	-9.29	75.0653	234.9	-0.063965	0.11865	-0.17285	NaN	NaN	NaN	NaN	NaN	NaN
0.626	82.102	33.6041	1403.2669	-1.4946	1.2388	-0.60498	17.6465	11.6069	8.616	0.056152	0.25488	-0.24414	-41.31429	59.24765	409.423	-0.066895	0.11768	-0.20117	NaN	NaN	NaN	NaN	NaN	NaN
0.628	48.228	45.2754	1374.2189	-1.4839	1.2368	-0.59033	21.7212	2.5588	30.4463	-0.034668	0.32324	-0.26709	-32.133	109.1067	595.397	-0.096681	0.12573	-0.21216	NaN	NaN	NaN	NaN	NaN	NaN
0.63	28.40016	36.7236	1361.352	-1.4761	1.2329	-0.58008	58.2	-80.6344	81.046	-0.093262	0.34961	-0.28613	-4.604	87.8267	766.891	-0.14941	0.13623	-0.22607	NaN	NaN	NaN	NaN	NaN	NaN
0.632	27.1838	23.9213	1362.555	-1.4683	1.2231	-0.5542	25.3873	-15.702	113.5416	-0.22607	0.4292	-0.33105	74.945	90.469	970.013	-0.2583	0.16016	-0.25342	NaN	NaN	NaN	NaN	NaN	NaN
0.634	36.006	30.4451	1346.498	-1.4605	1.2168	-0.54444	23.028	-14.026	160.3247	-0.34277	0.51538	-0.3689	47.6	-4.971	1204.314	-0.33008	0.18311	-0.26221	NaN	NaN	NaN	NaN	NaN	NaN
0.636	37.175	27.5122	1332.284506	-1.4517	1.2017	-0.52783	72.771	1.709	260.7786	-0.47998	0.62549	-0.40771	30.9768	-19.797	1415.405	-0.5249	0.22803	-0.29248	NaN	NaN	NaN	NaN	NaN	NaN
0.638	-13.35908	24.8594	1313.0576	-1.439	1.1851	-0.51123	13.3168	46.601	355.938	-0.71094	0.81055	-0.46094	14.904	-68.031	1533.135	-0.70533	0.27466	-0.31958	NaN	NaN	NaN	NaN	NaN	NaN
0.64	5.981	4.123	1282.3439	-1.4272	1.1646	-0.49951	31.261	17.112	523.418	-0.84912	0.92041	-0.47998	-34.274	-22.608	1570.776	-0.91162	0.33887	-0.34082	NaN	NaN	NaN	NaN	NaN	NaN
0.642	13.7291	7.65	1251.2692	-1.3965	1.1289	-0.47949	71.457	41.94	681.128	-1.1772	1.1382	-0.48096	-48.226	-63.434	1583.081	-1.2383	0.46289	-0.35498	NaN	NaN	NaN	NaN	NaN	NaN
0.644	16.0349	15.618	1255.044	-1.3689	1.0979	-0.47388	54.342	40.7574	818.124	-1.4639	1.3062	-0.46338	-56.213	-79.489	1588.854	-1.418	0.55078	-0.36426	NaN	NaN	NaN	NaN	NaN	NaN
0.646	-16.6516	18.766	1262.853	-1.3398	1.0645	-0.46387	89.328	-2.5429	1008.6031	-1.7656	1.4824	-0.42773	-86.686	-162.675	1554.913	-1.8125	0.7959	-0.35742	NaN	NaN	NaN	NaN	NaN	NaN
0.648	-21.07302	36.2956	1244.2777	-1.2983	1.0171	-0.45166	37.8381	32.402	1126.2136	-2.1777	1.752	-0.36914	-127.321	-174.576	1517.137	-2.1191	1.0058	-0.33545	NaN	NaN	NaN	NaN	NaN	NaN
0.65	-8.179	50.6177	1212.1772	-1.2788	0.99072	-0.44287	3.7952	-23.562	1238.282	-2.3691	1.9023	-0.34277	-102.051	-242.16	1452.069	-2.4155	1.2329	-0.28369	NaN	NaN	NaN	NaN	NaN	NaN
0.652	-15.5986	68.533	1195.8795	-1.2456	0.94678	-0.42529	0.134999999999998	-45.763	1299.966	-2.6641	2.2051	-0.32666	-115.321	-284.27	1425.765	-2.7969	1.5742	-0.18701	NaN	NaN	NaN	NaN	NaN	NaN
0.654	-1.363	63.1136	1180.327	-1.2183	0.91455	-0.41333	-62.272	-17.775	1308.558	-2.7351	2.4056	-0.36206	-97.13	-282.383	1352.915	-2.9629	1.7539	-0.15332	NaN	NaN	NaN	NaN	NaN	NaN
0.656	-14.5897	71.3275	1152.0514	-1.1934	0.88477	-0.40234	-72.186	-103.132	1349.876	-2.6636	2.5415	-0.42334	-86.942	-229.8478	1295.207	-3.209	2.0859	-0.17139	NaN	NaN	NaN	NaN	NaN	NaN
0.658	4.6206	79.256	1116.9119	-1.1602	0.85547	-0.39551	-105.033	-115.234	1354.11	-2.269	2.5513	-0.53369	-60.179	-160.26	1209.621	-3.2158	2.2177	-0.23632	NaN	NaN	NaN	NaN	NaN	NaN
0.66	-10.3333	83.531	1079.05	-1.1465	0.84375	-0.38574	-148.348	-142.741	1351.941	-1.9683	2.4673	-0.59521	-106.702	-104.23	1243.764	-3.0586	2.2031	-0.30957	NaN	NaN	NaN	NaN	NaN	NaN
0.662	8.9539	79.342	1063.7536	-1.1138	0.81104	-0.36816	-110.583	-216.4	1329.916	-1.2944	2.1548	-0.71338	-151.536	-99.203	1243.096	-2.6016	1.9063	-0.39258	NaN	NaN	NaN	NaN	NaN	NaN
0.664	21.41	85.9226	1051.3651	-1.0918	0.79004	-0.36035	-119.4515	-204.203	1263.508	-0.82349	1.8704	-0.78735	-175.57	-145.82	1267.663	-2.3237	1.6899	-0.42871	NaN	NaN	NaN	NaN	NaN	NaN
0.666	40.9268	79.069	1041.495	-1.064	0.76514	-0.34912	-108.803	-240.555	1228.731	-0.42773	1.5981	-0.83154	-154.966	-189.748	1233.094	-1.7983	1.2798	-0.49072	NaN	NaN	NaN	NaN	NaN	NaN
0.668	15.311	68.691	1018.4679	-1.0269	0.73389	-0.33154	-58.141	-189.7276	1188.989	-0.11963	1.2715	-0.82422	-144.393	-218.095	1228.656	-1.5281	1.0525	-0.52808	NaN	NaN	NaN	NaN	NaN	NaN
0.67	-8.8427	75.2531	993.6734	-1.0137	0.71826	-0.32471	-121.1801	-88.493	1148.9717	-0.060059	1.1509	-0.81494	-143.514	-251.6832	1242.813	-1.3672	0.9082	-0.55957	NaN	NaN	NaN	NaN	NaN	NaN
0.672	24.3807	98.84	981.7737	-0.9707	0.68555	-0.30859	-104.2881	-75.605	1162.5359	-0.058105	0.9917	-0.83154	-150.181	-283.584	1297.022	-1.2637	0.81445	-0.57422	NaN	NaN	NaN	NaN	NaN	NaN
0.674	37.7956	100.715	988.433	-0.94629	0.65845	-0.29663	-103.892	-49.112	1138.2634	-0.061035	0.91479	-0.84546	-94.559	-311.06	1303.285	-1.2168	0.79688	-0.58594	NaN	NaN	NaN	NaN	NaN	NaN
0.676	18.211	85.996	968.221	-0.91797	0.63086	-0.28516	-132.076	-116.854	1125.861	-0.04248	0.85352	-0.84961	-52.342	-362.853	1341.251	-1.0723	0.7334	-0.62891	NaN	NaN	NaN	NaN	NaN	NaN
0.678	2.589	81.2659	932.762	-0.87842	0.59619	-0.27295	-78.8472	-182.096	1139.5726	4.4235e-14	0.78564	-0.82764	10.364	-396.09	1394.824	-0.92188	0.67041	-0.64892	NaN	NaN	NaN	NaN	NaN	NaN
0.68	4.276	81.8668	894.0683	-0.86279	0.57861	-0.2666	-107.483	-162.952	1127.027	0.024902	0.74902	-0.81641	1.081	-411.21	1480.612	-0.75928	0.6001	-0.66357	NaN	NaN	NaN	NaN	NaN	NaN
0.682	-5.488	77.077	874.517	-0.81738	0.54297	-0.25488	-94.35	-223.64	1141.32	0.063965	0.69482	-0.80029	14.411	-362.669	1531.3591	-0.59863	0.51953	-0.66016	NaN	NaN	NaN	NaN	NaN	NaN
0.684	-23.0621	90.959	856.917	-0.78687	0.51734	-0.24854	-21.991	-247.174	1151.341	0.072509	0.6604	-0.79151	11.21	-318.959	1582.1	-0.54785	0.49854	-0.65283	NaN	NaN	NaN	NaN	NaN	NaN
0.686	-2.765	106.535	835.187	-0.75928	0.49561	-0.24219	-33.56203	-274.645	1149.424	0.069336	0.64355	-0.78906	8.607	-277.948	1597.457	-0.52588	0.49023	-0.62598	NaN	NaN	NaN	NaN	NaN	NaN
0.688	-7.8	119.116	777.7293	-0.72168	0.46484	-0.22461	-16.41295	-347.505	1210.9558	0.0083008	0.66064	-0.79248	30.2494	-267.741	1606.88	-0.60791	0.53369	-0.59277	NaN	NaN	NaN	NaN	NaN	NaN
0.69	-11.685	94.748	770.4943	-0.70264	0.45068	-0.21582	50.335	-338.66	1216.675	-0.055664	0.68799	-0.7876	49.47	-225.884	1624.658	-0.6875	0.57813	-0.58252	NaN	NaN	NaN	NaN	NaN	NaN
0.692	-44.26358	100.317	763.0714	-0.6665	0.42725	-0.19873	25.4872	-352.08	1295.434	-0.24219	0.77539	-0.7832	65.007	-171.537	1611.7519	-0.88232	0.69385	-0.57178	NaN	NaN	NaN	NaN	NaN	NaN
0.694	-26.649	119.9533	743.6272	-0.63403	0.40942	-0.18726	58.473	-355.966	1386.417	-0.427	0.90064	-0.79053	76.922	-92.868	1643.643	-1.051	0.81225	-0.57959	NaN	NaN	NaN	NaN	NaN	NaN
0.696	-11.371	137.5068	718.3128	-0.60742	0.39063	-0.17773	58.2891	-291.877	1403.382	-0.62109	1.0605	-0.79492	86.757	-61.076	1669.901	-1.2266	0.94434	-0.59961	NaN	NaN	NaN	NaN	NaN	NaN
0.698	-22.6205	125.792	686.888	-0.56836	0.37158	-0.16553	38.7411	-304.205	1407.764	-0.85547	1.3223	-0.78516	68.753	-42.617	1721.796	-1.4453	1.1348	-0.64258	NaN	NaN	NaN	NaN	NaN	NaN
0.7	-41.9817	118.051	662.507	-0.54834	0.35986	-0.16016	110.051	-254.4856	1415.517	-1.0027	1.5305	-0.76538	91.292	-71.537	1718.219	-1.5425	1.2427	-0.67432	NaN	NaN	NaN	NaN	NaN	NaN
0.702	-29.2648	119.576	627.174	-0.50928	0.33643	-0.1416	38.547	-219.793	1414.3025	-1.1245	1.7329	-0.7583	78.904	-110.3065	1732.6101	-1.7241	1.4692	-0.74365	NaN	NaN	NaN	NaN	NaN	NaN
0.704	-27.9529	125.0571	607.0517	-0.48438	0.32202	-0.13135	59.868	-238.081	1461.9317	-1.2466	1.9634	-0.78662	43.5996	-136.208	1752.7698	-1.8757	1.6214	-0.78931	NaN	NaN	NaN	NaN	NaN	NaN
0.706	-32.3546	131.08846	591.0442	-0.45654	0.30225	-0.11914	93.607	-176.187	1464.672	-1.2886	2.0415	-0.81104	11.6289	-127.8876	1845.669	-2.0464	1.7622	-0.80908	NaN	NaN	NaN	NaN	NaN	NaN
0.708	-18.3168	125.5413	578.046	-0.42529	0.27588	-0.10889	62.165	-167.497	1448.842	-1.334	2.1074	-0.88281	-1.8008	-114.7762	1882.408	-2.3086	1.9258	-0.81641	NaN	NaN	NaN	NaN	NaN	NaN
0.71	-12.901	116.7776	550.5188	-0.41016	0.26611	-0.10449	102.789	-199.827	1494.903	-1.3442	2.1021	-0.94287	0.0301999999999998	-110.1437	1891.877	-2.4375	2	-0.81738	NaN	NaN	NaN	NaN	NaN	NaN
0.712	6.559	102.67	539.593	-0.36768	0.2417	-0.092285	58.199	-196.127	1479.816	-1.3354	2.0923	-0.99854	-2.8667	-147.104	1876.4884	-2.6797	2.1348	-0.81445	NaN	NaN	NaN	NaN	NaN	NaN
0.714	14.9433	102.44	522.3098	-0.34668	0.22876	-0.08374	18.5878	-227.4614	1500.7111	-1.314	2.1001	-1.0386	-7.57339	-154.089	1926.735	-2.7979	2.2012	-0.82495	NaN	NaN	NaN	NaN	NaN	NaN
0.716	27.2276	107.2706	514.6017	-0.3208	0.21533	-0.072754	59.748	-208.32858	1541.719	-1.3027	2.1094	-1.0391	-30.75	-155.24	1910.951	-2.8398	2.2285	-0.82813	NaN	NaN	NaN	NaN	NaN	NaN
0.718	39.2802	123.4638	471.4284	-0.28125	0.19141	-0.063477	22.2665	-187.7095	1556.0458	-1.3066	2.1348	-1.0488	-31.974	-95.849	1876.023	-2.7632	2.1763	-0.83057	NaN	NaN	NaN	NaN	NaN	NaN
0.72	13.955	126.03	448.5064	-0.26367	0.18115	-0.060547	7.645	-206.527	1611.824	-1.3531	2.1938	-1.0513	-31.782	-54.677	1826.4089	-2.689	2.1392	-0.83154	NaN	NaN	NaN	NaN	NaN	NaN
0.722	14.727	118.309	439.5075	-0.22754	0.16309	-0.050781	11.8568	-186.1595	1637.014	-1.4429	2.2856	-1.0562	-26.3518	-40.2908	1812.33	-2.5605	2.0996	-0.8291	NaN	NaN	NaN	NaN	NaN	NaN
0.724	38.7674	118.277	416.4818	-0.19263	0.15064	-0.040772	-11.6045	-186.764	1629.449	-1.5957	2.4004	-1.0781	5.9717	-41.6424	1806.65802	-2.4914	2.1214	-0.82593	NaN	NaN	NaN	NaN	NaN	NaN
0.726	35.1785	117.396	401.8917	-0.1626	0.1377	-0.035645	-2.9054	-186.294	1664.297	-1.6479	2.4321	-1.0815	-19.9446	-27.4331	1796.5873	-2.4473	2.1523	-0.81641	NaN	NaN	NaN	NaN	NaN	NaN
0.728	21.3662	117.391418	380.7749	-0.12695	0.11914	-0.026367	7.349	-135.0501	1656.602	-1.6655	2.438	-1.064	-0.793000000000003	30.538	1754.7463	-2.375	2.1738	-0.76758	NaN	NaN	NaN	NaN	NaN	NaN
0.73	3.123	107.9055	365.896	-0.10986	0.11621	-0.020508	-3.384	-148.145	1640.83	-1.5964	2.3913	-1.0554	-13.8749	80.009	1742.349	-2.3105	2.1563	-0.73633	NaN	NaN	NaN	NaN	NaN	NaN
0.732	22.1649	110.2799	333.3658	-0.074219	0.097168	-0.015137	55.3481	-124.7795	1630.4108	-1.498	2.3184	-1.0566	11.495	105.913	1728.608	-2.1499	2.0571	-0.70557	NaN	NaN	NaN	NaN	NaN	NaN
0.734	17.4093	107.8819	303.509	-0.048584	0.090332	-0.004883	52.5977	-100.3772	1585.822	-1.373	2.1914	-1.0469	28.1152	96.548	1728.035	-2.0366	1.9312	-0.70312	NaN	NaN	NaN	NaN	NaN	NaN
0.736	20.493	100.0837	298.0714	-0.027832	0.084473	0.0053711	39.81125	-101.485	1611.879	-1.3379	2.1328	-1.042	61.6674	71.121	1691.81	-1.9448	1.7974	-0.70068	NaN	NaN	NaN	NaN	NaN	NaN
0.738	32.2547	98.8079	275.24514	-0.0014648	0.07666	0.0063477	61.374	-64.258	1619.275	-1.3047	2.0332	-1.0254	68.892	42.1279	1698.125	-1.8711	1.6387	-0.69922	NaN	NaN	NaN	NaN	NaN	NaN
0.74	18.278	103.3375	257.748	0.01123	0.075195	0.010742	33.1518	-43.0709	1601.441	-1.3169	1.976	-1.0156	44.825	41.107	1689.1861	-1.8438	1.5742	-0.69629	NaN	NaN	NaN	NaN	NaN	NaN
0.742	-3.6292	109.999	253.6796	0.030273	0.06543	0.016602	64.993	-33.1774	1629.561	-1.3296	1.9263	-1.0112	8.1429	48.276	1716.033	-1.8008	1.4824	-0.70313	NaN	NaN	NaN	NaN	NaN	NaN
0.744	-24.93399	98.8385	255.222	0.040283	0.060547	0.02417	63.551	-0.603999999999999	1625.8254	-1.3486	1.873	-1	25.6663	102.586	1697.92	-1.7751	1.4553	-0.70459	NaN	NaN	NaN	NaN	NaN	NaN
0.746	-17.42	95.7914	244.1161	0.054199	0.056152	0.029785	49.2829	-10.344	1645.0489	-1.3457	1.8535	-0.99023	59.4524	109.056	1663.569	-1.7573	1.4556	-0.70166	NaN	NaN	NaN	NaN	NaN	NaN
0.748	-6.957	90.4475	203.3241	0.064453	0.042969	0.035645	112.9	-3.43300000000001	1646.782	-1.3203	1.8145	-0.96484	100.911	132.464	1611.8039	-1.73	1.4614	-0.69873	NaN	NaN	NaN	NaN	NaN	NaN
0.75	-37.4121	86.5568	185.6964	0.076172	0.03711	0.038818	63.186	0.0289999999999999	1600.0931	-1.2922	1.7863	-0.94555	84.3078	104.551	1620.6098	-1.7163	1.4712	-0.69092	NaN	NaN	NaN	NaN	NaN	NaN
0.752	-29.20004	89.5012	167.5122	0.081055	0.030273	0.041504	82.003	-29.3981	1597.7939	-1.2515	1.7563	-0.92725	39.772	134.371	1579.413	-1.6895	1.4824	-0.67383	NaN	NaN	NaN	NaN	NaN	NaN
0.754	-29.0611	91.362	158.00755	0.095215	0.025879	0.039063	117.861	-26.0479	1610.9594	-1.1948	1.7329	-0.90479	21.651	161.1468	1559.716	-1.6631	1.4756	-0.66602	NaN	NaN	NaN	NaN	NaN	NaN
0.756	-24.2686	97.6984	133.0796	0.095703	0.026855	0.041504	90.363	-32.4774	1614.8122	-1.1738	1.7129	-0.89258	-6.984	223.641	1514.291	-1.6226	1.4595	-0.65234	NaN	NaN	NaN	NaN	NaN	NaN
0.758	-24.848	72.6012	131.4372	0.10254	0.018066	0.043945	131.266	-37.5379	1626.786	-1.1382	1.6919	-0.87256	-53.0356	210.472	1505.864	-1.5605	1.4277	-0.63086	NaN	NaN	NaN	NaN	NaN	NaN
0.76	-2.843	71.3327	138.0836	0.11133	0.014649	0.049072	117.374	-9.6718	1607.994	-1.1252	1.6672	-0.8479	-44.813	242.356	1481.7715	-1.5249	1.4106	-0.62061	NaN	NaN	NaN	NaN	NaN	NaN
0.762	7.201	76.6061	147.1872	0.10986	0.014648	0.039551	73.29	-5.077	1563.391	-1.1182	1.6484	-0.82422	-60.808	229.052	1416.7361	-1.4595	1.3608	-0.60107	NaN	NaN	NaN	NaN	NaN	NaN
0.764	-10.594	81.8793	123.3754	0.1084	0.013672	0.039063	92.612	13.927	1563.003	-1.1187	1.6177	-0.78174	-94.3992	295.99	1336.611	-1.4006	1.3167	-0.57739	NaN	NaN	NaN	NaN	NaN	NaN
0.766	-7.273	75.5575	110.375	0.10645	0.017578	0.036621	36.9278	69.515	1523.0484	-1.1172	1.5996	-0.76953	-113.275	276.674	1315.3921	-1.3354	1.2739	-0.55713	NaN	NaN	NaN	NaN	NaN	NaN
0.768	0.564	73.218	115.427	0.10303	0.017578	0.035156	34.941	68.3512	1497.6334	-1.1191	1.5723	-0.72949	-107.5962	288.293	1285.38978	-1.2461	1.2119	-0.52539	NaN	NaN	NaN	NaN	NaN	NaN
0.77	-2.989	67.751	99.096	0.092774	0.022461	0.036621	67.441	85.776	1495.211	-1.1062	1.5451	-0.70776	-119.3955	211.5373	1251.394	-1.2041	1.1875	-0.50977	NaN	NaN	NaN	NaN	NaN	NaN
0.772	2.062	54.934	69.2552	0.089355	0.022461	0.034668	6.7302	91.2804	1447.45	-1.0845	1.5063	-0.68311	-91.689	230.761	1183.795	-1.1309	1.1348	-0.46826	NaN	NaN	NaN	NaN	NaN	NaN
0.774	9.143	48.9679	82.1222	0.079102	0.023926	0.038574	6.9676	82.1293	1463.436	-1.0317	1.4419	-0.64893	-97.075	182.15	1147.515	-1.0683	1.084	-0.43652	NaN	NaN	NaN	NaN	NaN	NaN
0.776	-1.218	54.6006	86.92403	0.069824	0.023438	0.03418	21.3153	121.1507	1424.358	-1.002	1.4063	-0.6377	-120.7663	227.714	1124.99189	-1.0039	1.0313	-0.40234	NaN	NaN	NaN	NaN	NaN	NaN
0.778	22.4468	55.6541	75.9883	0.0625	0.02832	0.030273	-26.2234	116.1736	1378.286	-0.9375	1.334	-0.61523	-147.25	204.6942	1098.148	-0.90283	0.94385	-0.36328	NaN	NaN	NaN	NaN	NaN	NaN
0.78	19.2703	54.9214	73.5296	0.058594	0.026367	0.031006	-8.721	101.8963	1360.438	-0.88306	1.2747	-0.59644	-166.225	268.177	1032.266	-0.85205	0.89697	-0.33789	NaN	NaN	NaN	NaN	NaN	NaN
0.782	30.6656	38.292	67.243	0.056641	0.024902	0.033691	-44.8114	117.6565	1311.3188	-0.83398	1.2158	-0.57813	-128.48	234.157	983.189	-0.76025	0.80225	-0.30273	NaN	NaN	NaN	NaN	NaN	NaN
0.784	35.8983	32.6725	52.6942	0.052246	0.023926	0.030762	-34.18134	87.624	1279.859	-0.77686	1.147	-0.55225	-89.065	249.983	925.0879	-0.6997	0.73242	-0.27759	NaN	NaN	NaN	NaN	NaN	NaN
0.786	13.528	28.98358	45.5471	0.049316	0.029785	0.036133	-15.128	102.346	1267.079	-0.75	1.1152	-0.54004	-79.512	182.4546	885.4514	-0.646	0.67432	-0.24951	NaN	NaN	NaN	NaN	NaN	NaN
0.788	15.5532	34.197	32.815	0.049316	0.025391	0.031738	-79.617	120.571	1240.627	-0.71436	1.061	-0.51855	-78.51	241.4233	820.7462	-0.58008	0.60059	-0.22119	NaN	NaN	NaN	NaN	NaN	NaN
0.79	5.804	35.943	37.036	0.054443	0.027587	0.036865	-40.9598	102.859	1236.5463	-0.68603	1.0209	-0.49511	-65.665	201.052	756.4145	-0.54883	0.56543	-0.21045	NaN	NaN	NaN	NaN	NaN	NaN
0.792	8.4551	29.9311	41.7223	0.058105	0.027344	0.037598	-25.6957	149.2973	1203.77224	-0.65967	0.98682	-0.47266	-63.998	267.4862	691.0619	-0.49365	0.50537	-0.17822	NaN	NaN	NaN	NaN	NaN	NaN
0.794	-5.235	21.1823	18.193	0.063477	0.021973	0.044434	-22.3644	160.137	1148.8749	-0.62842	0.93994	-0.45068	-29.576	207.3002	646.2554	-0.45069	0.47021	-0.15845	NaN	NaN	NaN	NaN	NaN	NaN
0.796	-14.827	13.317	28.203	0.062988	0.019043	0.046875	2.399	160.772	1145.353	-0.61328	0.91602	-0.42969	1.21000000000001	272.858	625.581	-0.4043	0.42969	-0.13232	NaN	NaN	NaN	NaN	NaN	NaN
0.798	-6.687	11.4289	36.81795	0.068848	0.0097656	0.053711	-24.5106	203.297	1109.343	-0.58154	0.87549	-0.39941	20.615	228.619	573.63216	-0.34766	0.38232	-0.11035	NaN	NaN	NaN	NaN	NaN	NaN
0.8	-11.699	22.5491	34.8929	0.072021	0.0061035	0.052002	17.137	158.2776	1071.22	-0.55737	0.84082	-0.36938	-10.596	292.418	498.463	-0.31787	0.36377	-0.093262	NaN	NaN	NaN	NaN	NaN	NaN
0.802	-1.8038	24.9012	3.34286	0.075195	0.0024414	0.052734	10.827	162.1066	1040.4122	-0.52832	0.80859	-0.35205	-10.967	230.8775	476.106	-0.25781	0.31689	-0.072266	NaN	NaN	NaN	NaN	NaN	NaN
0.804	-11.582	8.3347	10.4352	0.083984	-0.0053711	0.057129	-20.0473	168.471	983.571	-0.48877	0.76221	-0.31885	-31.953	256.8272	454.49404	-0.21631	0.28858	-0.054199	NaN	NaN	NaN	NaN	NaN	NaN
0.806	-10.692	-3.3053	13.7372	0.084961	-0.0068359	0.058105	44.7379	125.51	959.77	-0.47314	0.73682	-0.30322	-30.443	175.59	416.8434	-0.16699	0.26318	-0.035645	NaN	NaN	NaN	NaN	NaN	NaN
0.808	-6.991	-6.69166	1.62395	0.086914	-0.01123	0.060059	22.563	171.0828	927.181	-0.43115	0.68164	-0.27734	-4.636	232.6482	399.0236	-0.11523	0.22412	-0.0078125	NaN	NaN	NaN	NaN	NaN	NaN
0.81	-16.204	4.6686	-2.4167	0.091553	-0.0087891	0.066407	-7.971	179.2236	875.14112	-0.40014	0.63843	-0.24878	9.345	175.5751	332.2019	-0.094727	0.20313	0.0048828	NaN	NaN	NaN	NaN	NaN	NaN
0.812	-12.6038	7.4076	11.9684	0.090332	-0.013184	0.062988	35.59	179.793	860.407	-0.36963	0.59766	-0.22803	-13.708	225.423	309.5274	-0.060547	0.1626	0.032227	NaN	NaN	NaN	NaN	NaN	NaN
0.814	-16.483	9.57963	28.9926	0.088379	-0.0078125	0.060547	5.684	212.765	823.2455	-0.3252	0.54883	-0.20605	-20.379	169.8893	286.905	-0.039551	0.12817	0.047364	NaN	NaN	NaN	NaN	NaN	NaN
0.816	-13.6252	0.9891	23.1374	0.085938	-0.0073242	0.062012	-1.796	169.1775	799.174	-0.30225	0.52979	-0.18213	-35.524	217.914	241.341	-0.027344	0.10059	0.060547	NaN	NaN	NaN	NaN	NaN	NaN
0.818	-14.01	1.1045	3.5991	0.077148	0.0014648	0.066895	15.617	188.927	794.386	-0.25928	0.47754	-0.14404	-25.238	167.174	175.786	-0.018555	0.064941	0.072754	NaN	NaN	NaN	NaN	NaN	NaN
0.82	6.408	-3.0043	8.2345	0.070313	0.00708	0.068847	-20.475	217.953	746.8369	-0.22729	0.44555	-0.12451	-38.121	177.852	168.741	-0.023682	0.040283	0.076172	NaN	NaN	NaN	NaN	NaN	NaN
0.822	6.165	1.92285	17.5579	0.061035	0.01123	0.071289	7.149	175.6159	711.7828	-0.19385	0.4126	-0.10156	-64.7933	109.067	139.598	-0.032715	0.02002	0.078125	NaN	NaN	NaN	NaN	NaN	NaN
0.824	12.173	12.8022	9.2776	0.053711	0.022949	0.068359	-5.893	202.8025	675.8086	-0.15625	0.37891	-0.080566	-89.468	148.6283	139.666	-0.053223	-0.0014648	0.083008	NaN	NaN	NaN	NaN	NaN	NaN
0.826	12.259	20.4922	2.7805	0.047852	0.031738	0.066895	-35.3631	169.607	602.6392	-0.12891	0.36035	-0.068359	-77.9927	128.8382	101.2492	-0.067383	-0.0078125	0.085938	NaN	NaN	NaN	NaN	NaN	NaN
0.828	33.3885	17.10303	9.3382	0.036621	0.047852	0.06543	-5.411	134.92	600.665	-0.095703	0.33203	-0.043457	-97.347	177.611	81.2076	-0.10938	-0.019043	0.09375	NaN	NaN	NaN	NaN	NaN	NaN
0.83	38.5718	3.4497	21.02483	0.033448	0.058838	0.065185	-32.6408	177.6577	549.1879	-0.080566	0.31274	-0.022705	-86.597	113.396	86.281	-0.14063	-0.011963	0.10059	NaN	NaN	NaN	NaN	NaN	NaN
0.832	11.015	6.902	0.88517	0.027832	0.073242	0.059082	-45.7261	136.957	506.8681	-0.071289	0.29541	-0.0014648	-78.0622	116.913	79.4654	-0.1709	-0.0043945	0.11084	NaN	NaN	NaN	NaN	NaN	NaN
0.834	31.83849	14.5928	14.9486	0.019531	0.085938	0.059082	-39.4286	157.2142	485.3155	-0.066406	0.27832	0.022461	-35.798	56.191	47.2086	-0.2168	0.012695	0.12842	NaN	NaN	NaN	NaN	NaN	NaN
0.836	13.746	19.1057	11.6735	0.014648	0.091797	0.052734	-63.906	162.6304	436.2538	-0.077881	0.26319	0.043457	-37.5482	70.232	25.045	-0.23828	0.021484	0.13721	NaN	NaN	NaN	NaN	NaN	NaN
0.838	13.3664	8.81308	39.0854	0.0039063	0.10742	0.041992	-39.8543	112.723	410.84131	-0.086426	0.25635	0.055176	-21.2146	8.838	18.167	-0.28125	0.041992	0.13916	NaN	NaN	NaN	NaN	NaN	NaN
0.84	14.443	-21.5206	36.48646	-0.007324	0.1167	0.025635	-39.4697	165.5642	372.377	-0.10303	0.23975	0.077637	-40.058	-1.159	38.3965	-0.31372	0.059082	0.14673	NaN	NaN	NaN	NaN	NaN	NaN
0.842	15.329	-51.8671	52.2084	-0.023438	0.12891	0.01416	-35.5108	145.152	356.13936	-0.11328	0.23193	0.083496	-14.662	-27.4554	5.28	-0.33789	0.078613	0.14941	NaN	NaN	NaN	NaN	NaN	NaN
0.844	7.807	-50.9793	69.611	-0.053223	0.14893	0.003418	-8.2866	135.4039	334.4157	-0.11572	0.22363	0.095215	-3.059	-10.5397	4.7753	-0.36621	0.092773	0.15771	NaN	NaN	NaN	NaN	NaN	NaN
0.846	7.188	-31.6573	93.9273	-0.072266	0.15527	-0.011719	-26.2924	188.291	300.2891	-0.1189	0.21875	0.10571	19.8775	-1.91499	7.347	-0.38135	0.10303	0.15625	NaN	NaN	NaN	NaN	NaN	NaN
0.848	-5.841	-18.696	132.897	-0.12305	0.18066	-0.035645	-7.6724	135.6219	265.9872	-0.12207	0.20605	0.11621	10.983	-1.6259	56.472	-0.40527	0.11865	0.14893	NaN	NaN	NaN	NaN	NaN	NaN
0.85	-47.584	-14.0255	215.483	-0.16943	0.20556	-0.057373	24.7689	130.6926	242.1126	-0.12012	0.20166	0.12842	24.943	-0.828000000000001	57.115	-0.42285	0.12451	0.15942	NaN	NaN	NaN	NaN	NaN	NaN
0.852	-60.232	-21.1498	267.758	-0.22607	0.23096	-0.078613	-8.3856	129.717	204.4593	-0.11914	0.19531	0.13037	25.528	-5.7967	32.6216	-0.44385	0.13867	0.15771	NaN	NaN	NaN	NaN	NaN	NaN
0.854	-78.786	-41.9452	348.227	-0.31836	0.27637	-0.10889	30.34809	75.287	213.67	-0.11475	0.18896	0.14453	44.8788	-5.5836	1.1075	-0.47217	0.14795	0.15771	NaN	NaN	NaN	NaN	NaN	NaN
0.856	-84.093	-44.8046	466.868	-0.37305	0.30127	-0.12646	26.9563	138.866	189.9658	-0.1189	0.18116	0.15601	49.6065	-23.8416	33.6008	-0.48877	0.15674	0.16113	NaN	NaN	NaN	NaN	NaN	NaN
0.858	-115.96	-53.3617	565.49039	-0.51758	0.35742	-0.16211	32.192	118.0674	145.416	-0.11865	0.18066	0.16553	61.0014	-5.11129	17.0622	-0.51074	0.17139	0.16602	NaN	NaN	NaN	NaN	NaN	NaN
0.86	-115.458	-43.789	608.6459	-0.64868	0.42578	-0.18237	67.597	92.477	144.53938	-0.12549	0.16943	0.17822	40.723	9.4562	7.0096	-0.52149	0.17871	0.16871	NaN	NaN	NaN	NaN	NaN	NaN
0.862	-77.5701	-57.462	628.4696	-0.79053	0.5083	-0.19971	16.024	126.179	115.4678	-0.12988	0.16602	0.18115	35.67	58.733	-41.51782	-0.52783	0.18408	0.17969	NaN	NaN	NaN	NaN	NaN	NaN
0.864	-51.4747	-71.246	668.62394	-1.0229	0.62549	-0.20459	42.5337	70.015	110.0018	-0.12793	0.15381	0.18359	13.983	22.1876	-33.3709	-0.53027	0.1875	0.19189	NaN	NaN	NaN	NaN	NaN	NaN
0.866	-27.0148	-72.027	752.7738	-1.146	0.69092	-0.20166	67.01	88.9327	112.89	-0.12524	0.14257	0.19238	3.909	50.392	-21.3892	-0.52148	0.18945	0.1958	NaN	NaN	NaN	NaN	NaN	NaN
0.868	-12.708	-60.4573	795.2155	-1.3999	0.82178	-0.18506	30.9979	110.5546	80.0859	-0.12354	0.13721	0.19385	-7.741	6.0534	5.1082	-0.50342	0.18652	0.21191	NaN	NaN	NaN	NaN	NaN	NaN
0.87	30.063	-49.348	813.4677	-1.5759	0.92944	-0.17163	43.76	41.6869	95.682	-0.11914	0.12158	0.19678	3.115	38.55468	-17.532814	-0.47266	0.17944	0.22095	NaN	NaN	NaN	NaN	NaN	NaN
0.872	30.314	-19.914	873.3034	-1.7397	1.0435	-0.15918	41.6109	86.36	73.43	-0.1167	0.11182	0.19775	-12.117	4.171	-0.991	-0.43506	0.16309	0.23438	NaN	NaN	NaN	NaN	NaN	NaN
0.874	40.7027	-48.2172	933.85	-1.9121	1.207	-0.1416	18.1265	59.6084	39.5767	-0.11865	0.097168	0.19385	-45.0794	38.2132	-5.232	-0.37402	0.13672	0.24609	NaN	NaN	NaN	NaN	NaN	NaN
0.876	42.363	-92.731	960.914	-1.978	1.2896	-0.13525	27.0483	52.36279	30.39537	-0.11377	0.087403	0.20044	-64.1097	-3.186	19.455	-0.33447	0.11572	0.24609	NaN	NaN	NaN	NaN	NaN	NaN
0.878	65.737	-108.396	976.518	-2.0542	1.4517	-0.12549	12.2422	87.47	1.174	-0.10596	0.07373	0.19922	-44.475	55.3514	14.6611	-0.25049	0.066895	0.25	NaN	NaN	NaN	NaN	NaN	NaN
0.88	110.713	-73.093	1012.514	-2.063	1.5449	-0.13452	-19.2237	13.5599	17.88621	-0.095215	0.063477	0.20117	-61.198	15.0792	4.3221	-0.18018	0.02417	0.25562	NaN	NaN	NaN	NaN	NaN	NaN
0.882	128.244	-33.555	1054.877	-2.0288	1.5981	-0.14697	-3.008	30.5429	30.486	-0.09082	0.054688	0.20361	-56.6198	60.913	0.5383	-0.1084	-0.02002	0.25391	NaN	NaN	NaN	NaN	NaN	NaN
0.884	107.41	0.325000000000003	1064.993	-1.9199	1.5957	-0.16748	-30.3807	31.8801	-0.948399999999999	-0.069336	0.037109	0.2085	-57.277	5.5392	30.3778	-0.0048828	-0.072754	0.25	NaN	NaN	NaN	NaN	NaN	NaN
0.886	73.545	-15.617	1011.331	-1.7986	1.5471	-0.17749	-24.50827	-34.527	18.0046	-0.049072	0.020507	0.20923	-78.952225	50.3446	22.1154	0.044922	-0.10596	0.25195	NaN	NaN	NaN	NaN	NaN	NaN
0.888	97.882	-65.448	995.201	-1.666	1.4785	-0.18848	-39.5868	21.41254	13.5016	-0.027344	0	0.21338	-55.381	-0.334999999999997	1.61	0.15186	-0.1709	0.24072	NaN	NaN	NaN	NaN	NaN	NaN
0.89	106.068	-118.325	1030.9025	-1.4897	1.356	-0.18994	-48.2675	8.7312	-12.5414	0.0058594	-0.024902	0.21436	-37.475	43.6229	-4.694	0.21411	-0.21534	0.23291	NaN	NaN	NaN	NaN	NaN	NaN
0.892	86.798	-126.853	1067.226	-1.4097	1.2925	-0.18311	-8.368	12.62739	-6.5281	0.024902	-0.040039	0.20898	-45.8123	-6.9216	14.055	0.27637	-0.26221	0.22363	NaN	NaN	NaN	NaN	NaN	NaN
0.894	131.539	-106.9022	1066.741	-1.2715	1.1709	-0.146	-45.926	63.114	-27.619	0.062012	-0.075195	0.20947	-33.51	57.847	43.3544	0.35693	-0.31299	0.20996	NaN	NaN	NaN	NaN	NaN	NaN
0.896	136.236	-113.997	1056.218	-1.2002	1.103	-0.13086	-3.54	-4.894	0.5453	0.090088	-0.10376	0.2107	14.664	33.663	38.9205	0.3877	-0.33594	0.20313	NaN	NaN	NaN	NaN	NaN	NaN
0.898	132.647	-106.716	1038.106	-1.1387	1.0469	-0.12109	-6.676	5.9036	20.07005	0.11768	-0.12939	0.21338	-13.414	90.053	34.468	0.43945	-0.36865	0.1958	NaN	NaN	NaN	NaN	NaN	NaN
0.9	106.122	-125.76481	1052.551	-1.0625	1.0039	-0.10352	-18.98225	25.262	5.20009	0.15576	-0.15918	0.21045	11.3695	23.36471	27.1395	0.46875	-0.38281	0.18408	NaN	NaN	NaN	NaN	NaN	NaN
0.902	104.245	-140.195	1077.11	-1.0229	0.99072	-0.097168	8.22666	-20.1529	11.1651	0.17334	-0.17773	0.20898	14.85	21.9989	46.444	0.48828	-0.39258	0.18359	NaN	NaN	NaN	NaN	NaN	NaN
0.904	69.627	-159.425	1100.8331	-0.95459	0.96338	-0.084473	-10.5442	30.249	19.8415	0.21191	-0.21338	0.21045	10.264	-34.591	29.471	0.49463	-0.38818	0.18018	NaN	NaN	NaN	NaN	NaN	NaN
0.906	22.5474	-165.747	1136.267	-0.91578	0.94507	-0.072754	3.6577	10.8262	16.74312	0.23438	-0.23291	0.21119	32.8	14.776	20.1733	0.48877	-0.38818	0.17871	NaN	NaN	NaN	NaN	NaN	NaN
0.908	-12.3769	-153.9999	1134.073	-0.88867	0.92773	-0.059082	38.31554	-4.4529	31.83	0.25537	-0.25098	0.20898	67.165	-22.9835	29.7727	0.47314	-0.37061	0.17383	NaN	NaN	NaN	NaN	NaN	NaN
0.91	-39.089	-142.793	1137.447	-0.8667	0.91064	-0.029785	20.8057	42.729	-7.7783	0.28369	-0.26563	0.20703	32.045	-3.9445	39.5246	0.44849	-0.35327	0.17505	NaN	NaN	NaN	NaN	NaN	NaN
0.912	-4.4635	-157.5336	1120.3239	-0.86768	0.90869	-0.012695	36.553	-20.95	-9.51805	0.29199	-0.27246	0.20703	29.71795	-37.704	25.0729	0.42139	-0.32764	0.17432	NaN	NaN	NaN	NaN	NaN	NaN
0.914	-26.254	-169.6729	1118.344	-0.87744	0.89893	0.0078125	62.602	-0.17028	26.2037	0.31299	-0.27686	0.20752	39.955	0.8274	8.789	0.38525	-0.30127	0.17627	NaN	NaN	NaN	NaN	NaN	NaN
0.916	-41.657	-169.9132	1116.956	-0.88379	0.88575	0.0039063	15.3726	7.9885	6.9059	0.31665	-0.28296	0.21192	39.7449	-13.5826	-6.598	0.36133	-0.28467	0.17822	NaN	NaN	NaN	NaN	NaN	NaN
0.918	-44.224	-164.3374	1152.302	-0.88037	0.86572	-0.010742	69.939	-36.358	13.0518	0.31787	-0.28711	0.21094	17.07	8.8144	12.7422	0.31934	-0.25928	0.17676	NaN	NaN	NaN	NaN	NaN	NaN
0.92	-26.9596	-168.3587	1216.2302	-0.85645	0.81641	-0.044434	58.381	9.3908	13.6367	0.3125	-0.28711	0.21143	19.444	0.4066	26.5893	0.28906	-0.24366	0.17847	NaN	NaN	NaN	NaN	NaN	NaN
0.922	-35.2335	-163.604	1234.3327	-0.83789	0.79102	-0.069336	28.1014	-10.3144	18.2715	0.31006	-0.28613	0.2124	4.376	16.1568	5.1571	0.26758	-0.22803	0.17383	NaN	NaN	NaN	NaN	NaN	NaN
0.924	-28.961	-179.244	1216.8601	-0.80469	0.74414	-0.10254	61.126	-13.54694	32.2347	0.30078	-0.28027	0.20605	-3.883	4.797	-40.216	0.24316	-0.21045	0.17139	NaN	NaN	NaN	NaN	NaN	NaN
0.926	-24.257	-174.546	1224.8002	-0.78882	0.72388	-0.12231	10.3774	38.114	3.0837	0.28516	-0.27221	0.208	-31.535	11.49	-14.783	0.23828	-0.20117	0.17334	NaN	NaN	NaN	NaN	NaN	NaN
0.928	-50.285	-175.578	1245.734	-0.79346	0.71143	-0.14746	21.9579	-7.79432	6.3531	0.26758	-0.25879	0.20508	-39.0834	17.9337	-9.72717	0.22852	-0.19824	0.16504	NaN	NaN	NaN	NaN	NaN	NaN
0.93	-74.474	-146.7103	1269.291	-0.82715	0.70801	-0.18311	9.346	3.15844	4.67232	0.23633	-0.24414	0.20752	-50.228	43.79473	-1.156	0.2185	-0.19703	0.15992	NaN	NaN	NaN	NaN	NaN	NaN
0.932	-63.0319	-142.958	1287.4912	-0.86084	0.72119	-0.19678	-0.379	13.7179	-2.512	0.21777	-0.23535	0.20557	-23.072	66.552	-23.5393	0.20459	-0.19189	0.15381	NaN	NaN	NaN	NaN	NaN	NaN
0.934	-27.151	-150.748	1312.611	-0.93555	0.75879	-0.21875	4.436	-52.914	-0.2362	0.18408	-0.21338	0.20459	-73.8195	45.5816	-27.4237	0.18262	-0.17236	0.15186	NaN	NaN	NaN	NaN	NaN	NaN
0.936	19.51	-152.281	1322.2839	-1.0132	0.79834	-0.23291	-24.7347	1.3307	-7.8375	0.1582	-0.19507	0.20972	-41.1399	24.3576	-13.0951	0.16602	-0.16064	0.146	NaN	NaN	NaN	NaN	NaN	NaN
0.938	20.287	-147.454	1332.9519	-1.1045	0.8418	-0.25195	-11.65839	-7.08382	-15.4039	0.12598	-0.17725	0.20703	-75.29507	-11.8292	16.0824	0.12793	-0.13525	0.14209	NaN	NaN	NaN	NaN	NaN	NaN
0.94	22.7944	-138.44	1319.275	-1.25	0.92578	-0.271	-23.1484	-29.2279	5.8686	0.094238	-0.14746	0.20654	-57.9552	21.731	-8.2432	0.10156	-0.11353	0.13403	NaN	NaN	NaN	NaN	NaN	NaN
0.942	18.655	-115.4668	1321.6163	-1.3223	0.97559	-0.27637	-29.5881	50.522	-10.6672	0.07959	-0.13379	0.20361	-38.5101	18.281	16.587	0.08252	-0.091797	0.13428	NaN	NaN	NaN	NaN	NaN	NaN
0.944	38.3729	-111.1105	1354.653	-1.4883	1.1055	-0.27148	-28.4184	1.2895	-11.3995	0.059082	-0.10596	0.20313	-31.017	52.0287	17.34	0.058105	-0.064453	0.12744	NaN	NaN	NaN	NaN	NaN	NaN
0.946	34.572	-116.828	1360.952	-1.6108	1.2192	-0.26343	-11.92	3.39076	-10.2879	0.045166	-0.089843	0.19726	-49.8894	17.9722	52.9153	0.053223	-0.050293	0.12744	NaN	NaN	NaN	NaN	NaN	NaN
0.948	52.351	-126.478	1351.418	-1.7363	1.334	-0.25586	-43.792	34.9832	-13.6747	0.03418	-0.073242	0.1958	-42.5844	58.24	15.421	0.036621	-0.023438	0.12256	NaN	NaN	NaN	NaN	NaN	NaN
0.95	36.324	-127.0342	1354.2498	-1.8633	1.4727	-0.23584	-22.2502	-40.92	5.0481	0.023926	-0.04834	0.18945	-2.748	20.4698	9.8719	0.023926	0.0063477	0.10645	NaN	NaN	NaN	NaN	NaN	NaN
0.952	-3.584	-99.5044	1346.063	-1.9136	1.522	-0.23486	-12.3233	15.529888	3.4836	0.0097656	-0.035645	0.18994	-11.787	47.689	3.61793	0.017578	0.015625	0.10547	NaN	NaN	NaN	NaN	NaN	NaN
0.954	-9.657	-79.364	1353.6257	-1.9717	1.5918	-0.24609	-12.0611	6.0356	-8.4813	-0.0014648	0.00048828	0.18164	8.056	-3.564	57.74	-0.00097656	0.032227	0.092773	NaN	NaN	NaN	NaN	NaN	NaN
0.956	-17.519	-86.005	1354.0687	-1.9668	1.6133	-0.25049	9.112	-32.2403	5.8103	-0.0095214	0.015625	0.17993	3.21	44.8975	38.48	-0.018799	0.039307	0.085205	NaN	NaN	NaN	NaN	NaN	NaN
0.958	-16.456	-101.393	1372.81333	-1.939	1.6216	-0.26123	-6.1517	46.442	-12.3974	-0.018066	0.037598	0.17041	26.1916	0.92894	37.4395	-0.037109	0.045898	0.07959	NaN	NaN	NaN	NaN	NaN	NaN
0.96	-20.14	-108.901	1373.1394	-1.8945	1.5938	-0.26074	21.1166	-7.0746	-7.1767	-0.026855	0.05957	0.16406	36.9725	58.802	13.299	-0.062988	0.055176	0.062012	NaN	NaN	NaN	NaN	NaN	NaN
0.962	-34.352	-100.45431	1347.606	-1.875	1.5801	-0.25732	22.9875	19.8334	-9.8722	-0.033203	0.075684	0.16016	34.5432	-3.81373	52.2583	-0.076172	0.061035	0.060059	NaN	NaN	NaN	NaN	NaN	NaN
0.964	-64.496	-85.8131	1350.5437	-1.853	1.5591	-0.25732	10.9924	50.498	-5.784	-0.038086	0.104	0.14795	26.916	43.604	34.2796	-0.10352	0.076172	0.050781	NaN	NaN	NaN	NaN	NaN	NaN
0.966	-75.04371	-72.792	1378.502	-1.8579	1.5513	-0.25	36.3438	-25.2352	12.4415	-0.041748	0.11572	0.14331	30.3305	-0.959000000000001	11.2226	-0.12525	0.095459	0.041748	NaN	NaN	NaN	NaN	NaN	NaN
0.968	-77.544	-65.289	1381.8041	-1.8535	1.543	-0.23877	51.14	24.64	6.5771	-0.047363	0.13281	0.1416	40.936	52.462	4.40436	-0.14014	0.10889	0.038086	NaN	NaN	NaN	NaN	NaN	NaN
0.97	-86.6814	-73.699	1355.008	-1.8354	1.5337	-0.22168	49.612	14.11686	12.3781	-0.051758	0.14404	0.12939	36.4819	-22.0936	17.4478	-0.16846	0.13184	0.028809	NaN	NaN	NaN	NaN	NaN	NaN
0.972	-69.888	-83.331	1352.847	-1.8184	1.5215	-0.21289	41.2054	-6.7409	16.0617	-0.050781	0.15063	0.12134	7.291	-1.8018	21.73	-0.18457	0.13965	0.033691	NaN	NaN	NaN	NaN	NaN	NaN
0.974	-60.984	-73.20489	1367.9247	-1.7617	1.4883	-0.19873	34.13482	59.322	18.0411	-0.054199	0.1582	0.11377	-4.457	-58.515	29.005	-0.20996	0.16406	0.017578	NaN	NaN	NaN	NaN	NaN	NaN
0.976	-73.9426	-41.785	1363.1803	-1.7037	1.4517	-0.1919	47.8917	-5.94998	10.086	-0.060547	0.16406	0.10547	-4.16	-7.4075	-10.3817	-0.22632	0.18164	0.014404	NaN	NaN	NaN	NaN	NaN	NaN
0.978	-87.034	-24.088	1353.135	-1.6406	1.4082	-0.18799	45.4116	11.0457	18.9396	-0.0625	0.16553	0.099121	10.406	-31.8009	23.322	-0.24316	0.20215	0.0087891	NaN	NaN	NaN	NaN	NaN	NaN
0.98	-86.074	-25.762	1353.6015	-1.5684	1.3496	-0.18994	10.6101	41.802	-11.9012	-0.067383	0.17383	0.089844	-30.96	7.4414	85.826	-0.25928	0.22705	0.0097656	NaN	NaN	NaN	NaN	NaN	NaN
0.982	-73.945	-29.6495	1349.0451	-1.5366	1.3169	-0.18896	19.9757	-27.7325	1.7492	-0.072754	0.18115	0.077148	-28.148	-62.138	116.57492	-0.26221	0.23633	0.0058594	NaN	NaN	NaN	NaN	NaN	NaN
0.984	-52.6521	-40.1269	1356.8721	-1.4897	1.2612	-0.19629	17.6235	20.4351	8.0057	-0.078125	0.19238	0.063477	-33.065	4.8598	132.335	-0.28223	0.24902	-0.0092773	NaN	NaN	NaN	NaN	NaN	NaN
0.986	-27.679	-40.175	1346.3439	-1.4644	1.231	-0.18775	3.1957	0.0190000000000001	-11.35153	-0.09375	0.21191	0.037598	-22.8693	-5.66136	182.766	-0.29468	0.25831	-0.029296	NaN	NaN	NaN	NaN	NaN	NaN
0.988	-24.607	-23.993	1336.7316	-1.4473	1.2051	-0.18506	-7.443	-26.9047	16.3775	-0.10742	0.22363	0.024414	-88.8616	24.16467	328.056	-0.31055	0.271	-0.054688	NaN	NaN	NaN	NaN	NaN	NaN
0.99	-12.129	3.4884	1330.75	-1.4272	1.1763	-0.18604	-24.7248	33.8814	27.053	-0.1416	0.23975	0.0083008	-115.0069	-6.8543	530.616	-0.34619	0.29248	-0.083496	NaN	NaN	NaN	NaN	NaN	NaN
0.992	8.284	10.17826	1312.3547	-1.4155	1.1646	-0.18115	-5.451	-55.357	55.53576	-0.17846	0.25781	-0.015381	-123.294	50.5958	721.162	-0.37549	0.30566	-0.10498	NaN	NaN	NaN	NaN	NaN	NaN
0.994	11.714	7.1412	1294.9047	-1.4023	1.1445	-0.17871	-23.351	-51.31407	104.902	-0.22754	0.27344	-0.039551	-73.834	12.791	898.216	-0.45752	0.33447	-0.15527	NaN	NaN	NaN	NaN	NaN	NaN
0.996	18.667	-6.145	1317.8938	-1.3833	1.1319	-0.177	-13.515	-9.621	114.363	-0.31396	0.30811	-0.091309	-110.863	10.46232	1092.112	-0.55102	0.36743	-0.20092	NaN	NaN	NaN	NaN	NaN	NaN
0.998	39.466	12.5438	1307.886	-1.3696	1.1216	-0.17334	-29.5474	-60.242	154.3319	-0.36279	0.33203	-0.11084	-115.0203	-72.718	1237.894	-0.66064	0.40674	-0.24902	NaN	NaN	NaN	NaN	NaN	NaN
1	34.418	15.2792	1287.549	-1.3452	1.0981	-0.17285	-49.6945	-19.7282	224.2671	-0.48633	0.39502	-0.16895	-109.069	-49.601	1324.76516	-0.85889	0.49463	-0.31592	NaN	NaN	NaN	NaN	NaN	NaN
1.002	8.594	28.4516	1263.093	-1.332	1.082	-0.17236	-70.8869	-37.9214	298.54	-0.60425	0.44849	-0.20947	-81.8328	-20.311	1378.484	-0.97803	0.55713	-0.34326	NaN	NaN	NaN	NaN	NaN	NaN
1.004	18.803	43.481	1253	-1.3022	1.061	-0.16943	-68.977	-46.201	420.843	-0.75049	0.51416	-0.24756	-47.479	-10.741	1397.36	-1.2515	0.70361	-0.38623	NaN	NaN	NaN	NaN	NaN	NaN
1.006	24.265	43.237	1227.2493	-1.2813	1.0323	-0.16748	-46.124	39.77	584.237	-0.98242	0.61816	-0.29248	2.901	-88.622	1416.966	-1.4771	0.83008	-0.39991	NaN	NaN	NaN	NaN	NaN	NaN
1.008	43.0324	42.1677	1204.5677	-1.2617	1.0059	-0.16748	-64.895	-22.6086	735.279	-1.105	0.67822	-0.31104	62.966	-142.411	1450.329	-1.7124	0.96729	-0.39258	NaN	NaN	NaN	NaN	NaN	NaN
1.01	11.651	38.6618	1201.25567	-1.2358	0.97119	-0.15576	-65.811	-49.5852	859.8246	-1.3809	0.79785	-0.33057	120.093	-161.607	1416.997	-2.0151	1.1704	-0.3374	NaN	NaN	NaN	NaN	NaN	NaN
1.012	9.733	50.2948	1195.0578	-1.228	0.95361	-0.15967	-50.645	-37.701	936.935	-1.583	0.91065	-0.32984	130.294	-185.916	1403.31	-2.1636	1.2788	-0.30762	NaN	NaN	NaN	NaN	NaN	NaN
1.014	6.005	63.646	1194.826	-1.2144	0.93018	-0.15576	-36.974	-96.192	1030.451	-1.7793	1.0293	-0.32031	144.5717	-183.99	1373.686	-2.4214	1.4888	-0.23975	NaN	NaN	NaN	NaN	NaN	NaN
1.016	-10.702	59.2484	1145.12648	-1.1973	0.91163	-0.15161	-46.7604	-24.43	1097.649	-2.0073	1.1919	-0.29443	152.343	-224.836	1349.501	-2.5535	1.6389	-0.19604	NaN	NaN	NaN	NaN	NaN	NaN
1.018	-24.488	62.9159	1128.818	-1.1851	0.89893	-0.14893	3.282	-32.862	1118.063	-2.1011	1.2778	-0.28076	173.713	-180.004	1291.8936	-2.6128	1.7837	-0.1543	NaN	NaN	NaN	NaN	NaN	NaN
1.02	-18.951	67.8714	1120.8364	-1.1587	0.8833	-0.14893	28.3277	-115.0314	1120.346	-2.2378	1.4341	-0.25244	183.682	-168.476	1271.695	-2.5586	1.9023	-0.079102	NaN	NaN	NaN	NaN	NaN	NaN
1.022	-11.6195	81.9041	1096.5533	-1.1392	0.87159	-0.1416	48.066	-114.367	1115.4177	-2.2827	1.5415	-0.23438	168.592	-114.14	1278.49	-2.4707	1.918	-0.038574	NaN	NaN	NaN	NaN	NaN	NaN
1.024	-61.74	87.4271	1060.146	-1.1172	0.85938	-0.14258	94.752	-195.594	1138.291	-2.2793	1.6191	-0.22168	142.0727	-150.85	1343.7348	-2.2163	1.8384	0.019531	NaN	NaN	NaN	NaN	NaN	NaN
1.026	-48.598	85.6016	1059.4552	-1.0815	0.83447	-0.13672	104.7435	-184.421	1159.093	-2.1499	1.645	-0.23291	109.654	-148.34	1355.455	-1.9912	1.7714	0.051026	NaN	NaN	NaN	NaN	NaN	NaN
1.028	-41.0126	75.858	1047.6227	-1.0654	0.82422	-0.13672	108.036	-157.945	1150.931	-2.0332	1.6406	-0.22803	84.3542	-220.203	1343.4994	-1.7769	1.7075	0.081543	NaN	NaN	NaN	NaN	NaN	NaN
1.03	-45.0993	93.121	1018.2185	-1.0327	0.80322	-0.13574	95.709	-228.962	1127.56	-1.752	1.6035	-0.20313	97.679	-187.619	1288.438	-1.5698	1.6196	0.11621	NaN	NaN	NaN	NaN	NaN	NaN
1.032	-34.8415	93.661	981.8569	-1.0032	0.78394	-0.13623	83.305	-190.452	1112.4144	-1.5522	1.5718	-0.16723	130.782	-267.586	1293.1963	-1.4844	1.5801	0.13721	NaN	NaN	NaN	NaN	NaN	NaN
1.034	-11.053	106.7175	969.152	-0.97656	0.76563	-0.13525	77.418	-163.239	1096.748	-1.3965	1.5508	-0.1377	113.022	-271.427	1305.0612	-1.3374	1.4614	0.17725	NaN	NaN	NaN	NaN	NaN	NaN
1.036	9.7319	112.5392	941.823	-0.94092	0.73486	-0.12939	104.911	-153.922	1128.8774	-1.2651	1.5181	-0.10352	126.857	-346.649	1342.108	-1.2217	1.356	0.1687	NaN	NaN	NaN	NaN	NaN	NaN
1.038	-16.8751	112.2716	938.7127	-0.92627	0.72705	-0.12891	71.46	-83.03	1138.6308	-1.2285	1.5	-0.090332	122.109	-335.8	1358.054	-1.0933	1.2524	0.12793	NaN	NaN	NaN	NaN	NaN	NaN
1.04	7.417	98.5091	918.412	-0.89014	0.70557	-0.12598	38.7322	-122.614	1125.8348	-1.1616	1.4634	-0.071289	119.801	-388.83	1415.361	-0.89746	1.1191	0.053711	NaN	NaN	NaN	NaN	NaN	NaN
1.042	16.846	91.992	897.6946	-0.86206	0.68628	-0.12842	41.7278	-135.832	1123.2933	-1.1011	1.4057	-0.080566	78.979	-394.53	1480.055	-0.79883	1.0547	0.017578	NaN	NaN	NaN	NaN	NaN	NaN
1.044	31.6965	107.6932	868.5891	-0.83203	0.66797	-0.12793	32.697	-132.084	1092.146	-1.0308	1.3384	-0.091797	7.017	-419.56	1528.632	-0.62598	0.92773	-0.069336	NaN	NaN	NaN	NaN	NaN	NaN
1.046	30.242	115.0004	834.9108	-0.79492	0.64941	-0.125	25.0143	-224.88	1134.7596	-0.90381	1.2427	-0.092285	-72.113	-311.405	1528.215	-0.53882	0.8518	-0.14526	NaN	NaN	NaN	NaN	NaN	NaN
1.048	35.9484	119.451	814.1157348	-0.77344	0.63379	-0.12061	50.9988	-241.0894	1168.396	-0.83936	1.2017	-0.090332	-94.81	-258.660402	1528.573	-0.49316	0.78516	-0.20557	NaN	NaN	NaN	NaN	NaN	NaN
1.05	48.319	127.606	801.4281	-0.73584	0.60791	-0.12061	63.7019	-261.4047	1173.71	-0.73584	1.1196	-0.11084	-127.238	-174.627	1540.1895	-0.49463	0.74268	-0.29736	NaN	NaN	NaN	NaN	NaN	NaN
1.052	49.39	123.123	770.07	-0.70288	0.58789	-0.12256	64.86	-296.519	1214.3628	-0.68823	1.0588	-0.1377	-112.623	-204.372	1559.415	-0.51953	0.74805	-0.33008	NaN	NaN	NaN	NaN	NaN	NaN
1.054	67.433	105.2048	738.1787	-0.66846	0.56689	-0.11865	55.892	-257.448	1243.223	-0.65771	1.0083	-0.18018	-71.525	-177.227	1579.524	-0.61133	0.78711	-0.36914	NaN	NaN	NaN	NaN	NaN	NaN
1.056	55.467	94.2805	720.2743	-0.62695	0.53906	-0.11377	41.231	-289.61	1268.997	-0.65479	0.95068	-0.25146	-24.31	-175.453	1591.392	-0.70826	0.844	-0.3772	NaN	NaN	NaN	NaN	NaN	NaN
1.058	77.061	102.569	704.5008	-0.60498	0.52197	-0.11621	12.658	-322.508	1321.3033	-0.66797	0.92969	-0.27979	-26.8678	-116.5456	1623.324	-0.81055	0.90234	-0.37695	NaN	NaN	NaN	NaN	NaN	NaN
1.06	64.915	115.246	677.1642	-0.56055	0.48926	-0.12109	-32.864	-267.489	1365.614	-0.71875	0.89258	-0.31543	-11.7	-114.981	1642.926	-0.97461	0.99414	-0.38965	NaN	NaN	NaN	NaN	NaN	NaN
1.062	56.352	113.5399	642.8537	-0.52295	0.46436	-0.11694	-57.8567	-264.836	1394.179	-0.7832	0.88135	-0.32642	-40.702	-80.82144	1676.6651	-1.0679	1.0474	-0.40771	NaN	NaN	NaN	NaN	NaN	NaN
1.064	38.0086	106.4812	620.22652	-0.48389	0.44092	-0.11963	-64.48	-226.312	1426.122	-0.87256	0.88525	-0.33105	-18.64	-75.5422	1659.54	-1.2729	1.1509	-0.46729	NaN	NaN	NaN	NaN	NaN	NaN
1.066	31.6225	117.5002	593.8544	-0.43799	0.4126	-0.11426	-60.1	-185.431	1420.4492	-1.0151	0.92432	-0.35693	10.008	-73.9074	1705.0648	-1.4412	1.2649	-0.50269	NaN	NaN	NaN	NaN	NaN	NaN
1.068	12.2554	132.37	565.9524	-0.41699	0.39941	-0.11621	-46.347	-216.353	1443.349	-1.0874	0.93994	-0.37549	-14.7953	-97.577	1751.8818	-1.6411	1.4087	-0.5249	NaN	NaN	NaN	NaN	NaN	NaN
1.07	-5.1844	146.923	535.0824	-0.37256	0.36621	-0.11279	-1.0345	-169.719	1452.742	-1.2236	0.97852	-0.40527	-67.246	-136.158	1821.183	-1.9526	1.6753	-0.55029	NaN	NaN	NaN	NaN	NaN	NaN
1.072	11.8051	143.579	519.667	-0.34229	0.34668	-0.11279	16.5584	-168.0299	1457.468	-1.3303	1.0218	-0.42749	-70.7138	-141.5728	1832.161	-2.1235	1.8306	-0.56006	NaN	NaN	NaN	NaN	NaN	NaN
1.074	-18.9623	127.8704	500.1855	-0.31494	0.32275	-0.11035	9.182	-186.01	1499.587	-1.4492	1.0781	-0.44141	-36.733	-119.787	1844.366	-2.4688	2.1699	-0.57227	NaN	NaN	NaN	NaN	NaN	NaN
1.076	-28.8249	116.812	463.194	-0.27686	0.29932	-0.11475	-0.794	-141.8913	1510.532	-1.6348	1.1816	-0.46729	17.162	-82.71	1841.589	-2.7039	2.4026	-0.56128	NaN	NaN	NaN	NaN	NaN	NaN
1.078	-23.4839	100.434	427.204	-0.26318	0.28809	-0.11133	29.3339	-193.461	1528.166	-1.7397	1.2505	-0.47021	48.815	-80.93	1860.965	-2.8887	2.5791	-0.52734	NaN	NaN	NaN	NaN	NaN	NaN
1.08	-22.21132	109.69	432.3889	-0.23486	0.26221	-0.11084	25.0012	-198.129	1568.506	-1.9604	1.4106	-0.47217	69.626	-65.078	1827.359	-2.98	2.6724	-0.46729	NaN	NaN	NaN	NaN	NaN	NaN
1.082	-19.1895	114.386	404.63062	-0.21753	0.24903	-0.11036	6.7266	-182.515	1559.452	-2.1287	1.5374	-0.45581	59.141	-59.15285	1788.3913	-2.9218	2.6455	-0.43652	NaN	NaN	NaN	NaN	NaN	NaN
1.084	-37.1743	128.803	372.3192	-0.19629	0.23535	-0.1084	-15.6115	-221.603	1583.984	-2.2983	1.6685	-0.43896	47.978	4.1197	1778.054	-2.8066	2.5781	-0.40967	NaN	NaN	NaN	NaN	NaN	NaN
1.086	-22.987	114.907	359.9315	-0.1748	0.21729	-0.10449	-6.6868	-170.432	1577.1237	-2.4761	1.8267	-0.41162	35.3426	-0.871999999999996	1763.5658	-2.6113	2.4805	-0.40576	NaN	NaN	NaN	NaN	NaN	NaN
1.088	-32.9101	109.824	338.6014	-0.16357	0.20703	-0.10498	-1.446	-165.829	1596.5946	-2.5405	1.897	-0.39209	29.138	45.382	1736.072	-2.5234	2.4375	-0.41211	NaN	NaN	NaN	NaN	NaN	NaN
1.09	-21.3013	103.3005	327.9593	-0.13916	0.18457	-0.10059	28.001	-197.816	1654.659	-2.627	2.0039	-0.35742	18.297	26.635	1705.248	-2.3647	2.354	-0.39697	NaN	NaN	NaN	NaN	NaN	NaN
1.092	-28.87482	91.2705	309.2897	-0.12232	0.17212	-0.10327	24.368	-154.289	1639.471	-2.6394	2.0676	-0.33179	-8.348	72.264	1676.17	-2.2627	2.3037	-0.37768	NaN	NaN	NaN	NaN	NaN	NaN
1.094	-3.054	79.0518	296.8811	-0.10596	0.1582	-0.099609	33.668	-188.814	1617.907	-2.5854	2.106	-0.29492	-12.167	37.745	1725.76159	-2.1641	2.2344	-0.35303	NaN	NaN	NaN	NaN	NaN	NaN
1.096	10.0467	80.2907	274.9575	-0.078613	0.14307	-0.1001	48.9266	-167.76	1608.3466	-2.4063	2.0488	-0.21387	-50.8127	88.751	1768.401	-2.0508	2.1113	-0.34082	NaN	NaN	NaN	NaN	NaN	NaN
1.098	15.3432	77.37984	239.0912	-0.068359	0.13428	-0.10059	8.5296	-116.49	1560.406	-2.4878	2.0337	-0.29004	-98.262	43.2207	1758.131	-2.0078	2.0371	-0.34375	NaN	NaN	NaN	NaN	NaN	NaN
1.1	35.9882	81.1718	221.97636	-0.041016	0.11572	-0.10254	23.357	-128.216	1580.918	-2.4292	2.0903	-0.3916	-104.905	77.841	1684.1633	-1.9219	1.9063	-0.34766	NaN	NaN	NaN	NaN	NaN	NaN
1.102	54.2044	81.8922	208.9163	-0.016846	0.10108	-0.10376	0.221000000000004	-71.733	1580.8719	-2.2847	1.9946	-0.30737	-77.6489	12.90884	1636.947	-1.8569	1.8287	-0.35718	NaN	NaN	NaN	NaN	NaN	NaN
1.104	51.937	81.6096	198.3986	0.003418	0.082031	-0.10352	-31.915	-71.041	1541.29	-2.1792	1.9009	-0.23633	-101.3165	50.091	1611.147	-1.7866	1.7642	-0.37061	NaN	NaN	NaN	NaN	NaN	NaN
1.106	44.075	82.778	190.055	0.026367	0.068848	-0.10156	-23.533	-99.31609	1572.765	-2.0562	1.812	-0.22021	-94.4427	-11.274	1634.9104	-1.7051	1.6895	-0.37891	NaN	NaN	NaN	NaN	NaN	NaN
1.108	55.945	63.154	176.49675	0.041992	0.057617	-0.10791	-40.274	-25.057	1546.409	-1.955	1.7334	-0.23462	-67.7629	60.081	1624.368	-1.6792	1.6626	-0.3833	NaN	NaN	NaN	NaN	NaN	NaN
1.11	55.16	60.0449	171.73941	0.061523	0.038086	-0.10938	-41.6023	-39.953	1569.4046	-1.8589	1.6587	-0.24463	-45.242	30.661	1600.596	-1.6479	1.6274	-0.38916	NaN	NaN	NaN	NaN	NaN	NaN
1.112	57.86	63.0556	155.0766	0.073975	0.028809	-0.1062	-57.6131	-21.533	1603.8181	-1.7632	1.563	-0.24756	-62.149	130.153	1584.688	-1.6287	1.6087	-0.38916	NaN	NaN	NaN	NaN	NaN	NaN
1.114	48.794	66.836	139.1058	0.085938	0.015137	-0.10596	-54.2221	-3.466	1562.504	-1.73	1.5181	-0.23828	-37.6669	104.175	1572.9131	-1.6167	1.5864	-0.3833	NaN	NaN	NaN	NaN	NaN	NaN
1.116	42.6807	66.906	124.536	0.098633	0.0029297	-0.1001	-69.578	-80.047	1570.174	-1.6772	1.4438	-0.24756	-35.53	221.834	1511.799	-1.5874	1.5552	-0.36816	NaN	NaN	NaN	NaN	NaN	NaN
1.118	30.90617	58.356	124.2909	0.10547	-0.0043945	-0.10254	-68.7519	-57.791	1583.2485	-1.6492	1.4085	-0.25684	-13.517	199.161	1477.571	-1.5659	1.5396	-0.36475	NaN	NaN	NaN	NaN	NaN	NaN
1.12	22.88916	65.433	99.6179	0.11475	-0.012695	-0.097656	-40.574	-44.8642	1563.875	-1.627	1.3809	-0.26367	-58.2873	269.369	1446.3265	-1.5093	1.4927	-0.35205	NaN	NaN	NaN	NaN	NaN	NaN
1.122	15.32002	58.7197	100.0325	0.11718	-0.015137	-0.093018	-44.929	-51.9968	1571.202	-1.6055	1.3516	-0.26953	-35.6693	194.963	1434.1827	-1.4617	1.4514	-0.33496	NaN	NaN	NaN	NaN	NaN	NaN
1.124	28.639	45.2735	99.0853	0.11719	-0.020996	-0.089355	-50.3744	21.534	1542.6085	-1.5938	1.334	-0.27148	-32.2683	257.127	1390.48	-1.4199	1.4102	-0.31641	NaN	NaN	NaN	NaN	NaN	NaN
1.126	11.9331	34.24	99.0946	0.11572	-0.025391	-0.080566	-58.317	-12.5881	1529.2499	-1.5776	1.3013	-0.27002	18.4318	208.5379	1348.845	-1.3691	1.3496	-0.30371	NaN	NaN	NaN	NaN	NaN	NaN
1.128	-18.8046	40.179	82.5628	0.1123	-0.02832	-0.078125	-33.097	-5.7004	1551.729	-1.5525	1.2795	-0.26904	43.7769	289.486	1298.443	-1.3403	1.3247	-0.29443	NaN	NaN	NaN	NaN	NaN	NaN
1.13	-17.2374	35.7103	71.7752	0.11377	-0.02832	-0.071289	-38.086	42.11	1501.6585	-1.5269	1.2583	-0.27051	102.804	233.84073	1279.9114	-1.2793	1.2773	-0.27979	NaN	NaN	NaN	NaN	NaN	NaN
1.132	-8.079	35.7183	70.5915	0.10913	-0.029297	-0.066651	-34.545	26.009	1501.127	-1.5044	1.2349	-0.26514	84.059	298.793	1245.9908	-1.2329	1.2456	-0.27295	NaN	NaN	NaN	NaN	NaN	NaN
1.134	-29.3791	34.3026	73.5077	0.10645	-0.034668	-0.050781	-28.582	92.191	1493.0959	-1.4878	1.2134	-0.26514	83.091	243.9402	1224.3157	-1.1821	1.2114	-0.2666	NaN	NaN	NaN	NaN	NaN	NaN
1.136	-26.4481	50.337	62.1543	0.097168	-0.032227	-0.04834	-54.734	100.383	1456.2302	-1.4609	1.1855	-0.26123	85.71	298.42	1187.13776	-1.105	1.1646	-0.25537	NaN	NaN	NaN	NaN	NaN	NaN
1.138	-39.6793	41.1891	48.5985	0.090332	-0.039063	-0.044434	-27.17	80.5425	1457.596	-1.4438	1.1656	-0.25708	120.27	226.2966	1180.4713	-1.063	1.1333	-0.25391	NaN	NaN	NaN	NaN	NaN	NaN
1.14	-29.7434	34.63013	48.2919	0.083984	-0.041016	-0.029785	-2.733	138.511	1415.7114	-1.4238	1.1426	-0.25781	89.759	292.591	1131.60252	-0.96094	1.0518	-0.24561	NaN	NaN	NaN	NaN	NaN	NaN
1.142	-34.0989	35.7072	46.7119	0.078125	-0.046387	-0.027344	23.654	108.57593	1404.41	-1.3867	1.1104	-0.26025	80.123	264.692	1093.6895	-0.88574	0.98535	-0.23706	NaN	NaN	NaN	NaN	NaN	NaN
1.144	-2.407	34.6426	39.823	0.076172	-0.04834	-0.023926	44.0228	114.2746	1420.71	-1.3691	1.0977	-0.25488	45.983	326.184	1033.323	-0.81836	0.91504	-0.22852	NaN	NaN	NaN	NaN	NaN	NaN
1.146	-3.671	22.6797	37.7342	0.073242	-0.053223	-0.018555	23.152835	137.7144	1362.6566	-1.3257	1.0649	-0.25635	37.3211	272.231	982.4993	-0.74756	0.82471	-0.21436	NaN	NaN	NaN	NaN	NaN	NaN
1.148	-2.75	20.9228	33.3847	0.068848	-0.050293	-0.014648	26.0535	86.35	1358.34943	-1.2922	1.0402	-0.25463	28.2839	298.814	953.701	-0.71338	0.78076	-0.21338	NaN	NaN	NaN	NaN	NaN	NaN
1.15	9.5272	24.4966	16.1148	0.070313	-0.053223	-0.013672	37.5458	118.9623	1331.05485	-1.2578	1.0195	-0.25391	57.109	232.0711	940.008	-0.65723	0.70117	-0.20361	NaN	NaN	NaN	NaN	NaN	NaN
1.152	-5.52	28.1995	17.5642	0.067139	-0.053711	-0.016602	45.0945	90.096	1294.942	-1.2163	0.99365	-0.25439	48.149	261.3114	862.854	-0.62109	0.64746	-0.20019	NaN	NaN	NaN	NaN	NaN	NaN
1.154	32.7011	23.3952	29.47396	0.064941	-0.05127	-0.018066	23.791	81.346	1295.89	-1.1973	0.98047	-0.25049	54.97	233.4047	796.5211	-0.58203	0.59521	-0.19434	NaN	NaN	NaN	NaN	NaN	NaN
1.156	33.2427	17.9072	30.6308	0.064941	-0.046387	-0.018555	-3.2442	151.026	1261.1362	-1.1494	0.94922	-0.24609	26.9993	285.08974	722.11	-0.52539	0.53223	-0.19092	NaN	NaN	NaN	NaN	NaN	NaN
1.158	34.641	23.9306	31.3359	0.062988	-0.047852	-0.029297	-9.264	138.114	1226.6078	-1.1209	0.92994	-0.24389	11.1182	256.3349	689.314	-0.49121	0.49902	-0.18945	NaN	NaN	NaN	NaN	NaN	NaN
1.16	38.9817	14.5097	19.7301	0.05957	-0.03418	-0.02832	32.746	158.035	1220.1124	-1.0894	0.90576	-0.24072	-9.136	291.9032	641.5851	-0.42285	0.43066	-0.18164	NaN	NaN	NaN	NaN	NaN	NaN
1.162	31.3703	13.5508	23.8213	0.059082	-0.018066	-0.036133	16.1814	166.6755	1180.382	-1.0454	0.87939	-0.24512	-9.597	233.1731	590.7264	-0.36499	0.37671	-0.17969	NaN	NaN	NaN	NaN	NaN	NaN
1.164	40.3321	6.3176	37.627	0.061035	-0.01123	-0.039551	23.6106	127.592	1173.255	-1.0264	0.86133	-0.23633	-14.1826	246.049	533.2048	-0.30615	0.31885	-0.18164	NaN	NaN	NaN	NaN	NaN	NaN
1.166	36.3021	7.0034	15.4848	0.061523	0.003418	-0.049805	45.908	179.541	1123.1531	-0.9834	0.82031	-0.22852	-12.2824	204.664	529.291	-0.22559	0.24902	-0.17871	NaN	NaN	NaN	NaN	NaN	NaN
1.168	43.5175	10.6451	2.2677	0.061767	0.012939	-0.055908	23.416	164.26	1047.005	-0.95312	0.79248	-0.22363	-43.5497	238.58722	500.02	-0.19434	0.21289	-0.17773	NaN	NaN	NaN	NaN	NaN	NaN
1.17	32.4507	6.5879	3.251	0.0625	0.023438	-0.0625	6.5561	165.555	1041.0594	-0.92188	0.75977	-0.22363	-37.129	223.069	431.949	-0.12158	0.14258	-0.17236	NaN	NaN	NaN	NaN	NaN	NaN
1.172	29.809	3.5022	13.0851	0.063477	0.027344	-0.060059	28.205	216.1996	1002.7583	-0.87695	0.71973	-0.21924	8.719	226.5613	349.06455	-0.078614	0.089356	-0.1687	NaN	NaN	NaN	NaN	NaN	NaN
1.174	18.628	18.4363	13.85642	0.062012	0.033691	-0.063965	30.544	176.458	971.9943	-0.854	0.69385	-0.21826	16.82292	160.3659	295.959	-0.041504	0.049316	-0.17139	NaN	NaN	NaN	NaN	NaN	NaN
1.176	-0.507999999999999	13.0387	10.812	0.055176	0.037598	-0.070313	12.89769	189.455	943.4224	-0.80615	0.65283	-0.21777	24.1361	145.081	285.965	0.0048828	-0.020996	-0.1709	NaN	NaN	NaN	NaN	NaN	NaN
1.178	17.7439	7.33329	10.4486	0.049805	0.036377	-0.074218	-1.6069	196.181	902.501	-0.76709	0.61523	-0.21509	32.821	137.659	267.9003	0.020508	-0.046387	-0.17188	NaN	NaN	NaN	NaN	NaN	NaN
1.18	-4.105	6.60105	11.693	0.043945	0.036621	-0.082031	12.9891	159.0085	899.3723	-0.72656	0.58105	-0.21777	54.239	155.781	222.04291	0.046875	-0.097168	-0.16992	NaN	NaN	NaN	NaN	NaN	NaN
1.182	-13.461	10.216	21.4024	0.03418	0.040527	-0.090332	33.202	205.667	885.337	-0.65625	0.53711	-0.21631	45.956	141.0705	151.5328	0.059814	-0.12915	-0.16699	NaN	NaN	NaN	NaN	NaN	NaN
1.184	-32.948517	17.4793	7.6704	0.034668	0.037109	-0.091797	19.82952	193.4454	822.8072	-0.62354	0.51514	-0.21826	23.375	126.682	125.4984	0.066895	-0.15527	-0.16602	NaN	NaN	NaN	NaN	NaN	NaN
1.186	-15.349	9.1798	22.5073	0.029297	0.038086	-0.097168	40.358	165.1724	795.656	-0.55713	0.46631	-0.21484	18.147	117.3673	97.5969	0.059082	-0.18408	-0.1582	NaN	NaN	NaN	NaN	NaN	NaN
1.188	-37.6882	10.565	9.9405	0.02832	0.037354	-0.10229	53.359	179.0965	743.6926	-0.50122	0.43237	-0.21191	48.652	131.180087	84.405	0.049805	-0.18848	-0.16211	NaN	NaN	NaN	NaN	NaN	NaN
1.19	-40.5292	15.29292	3.9385	0.031738	0.044922	-0.10498	34.91	137.922	708.7084	-0.45313	0.39746	-0.20801	69.22	146.14	67.322	0.0092773	-0.19629	-0.15527	NaN	NaN	NaN	NaN	NaN	NaN
1.192	-35.43605	1.9456	-0.725999999999999	0.038086	0.049805	-0.11865	73.956	172.507	684.782	-0.38721	0.35205	-0.21045	65.216	134.575	95.17838	-0.023438	-0.19409	-0.15356	NaN	NaN	NaN	NaN	NaN	NaN
1.194	-23.6563	-0.8747	11.276935	0.04248	0.049805	-0.12012	82.248	195.3387	621.6051	-0.35645	0.32666	-0.21045	38.3845	110.092	68.5508	-0.063477	-0.18701	-0.15332	NaN	NaN	NaN	NaN	NaN	NaN
1.196	-9.868	15.79695	22.3553	0.04834	0.051758	-0.12891	65.52	151.21	590.475	-0.29883	0.28516	-0.20361	50.33	97.358	67.4638	-0.12012	-0.16309	-0.14404	NaN	NaN	NaN	NaN	NaN	NaN
1.198	-29.70738	17.7779	12.7852	0.053711	0.056884	-0.13037	65.648	166.4178	542.3773	-0.25195	0.25708	-0.19897	41.8728	92.728	8.54799999999999	-0.14893	-0.14404	-0.15479	NaN	NaN	NaN	NaN	NaN	NaN
1.2	-17.541	10.674	5.4916	0.058594	0.059082	-0.13281	44.759	146.2613	489.2517	-0.2124	0.229	-0.19141	53.4447	60.144	12.944	-0.20166	-0.10352	-0.1543	NaN	NaN	NaN	NaN	NaN	NaN
1.202	-3.151	7.59046	13.9317	0.061523	0.054199	-0.13721	48.673	158.4213	476.109	-0.16553	0.19385	-0.19238	12.661	28.8237	34.0659	-0.23975	-0.075927	-0.15039	NaN	NaN	NaN	NaN	NaN	NaN
1.204	4.307	7.9965	27.359	0.064941	0.055664	-0.14209	60.686	201.309	431.4567	-0.13916	0.17236	-0.18994	4.288	-0.2861	42.639	-0.27002	-0.048828	-0.15137	NaN	NaN	NaN	NaN	NaN	NaN
1.206	13.004	8.5132	8.9177	0.067871	0.048828	-0.14844	50.109	155.271	411.4726	-0.096191	0.13184	-0.19434	-34.8794	7.83602	4.34075	-0.29785	-0.013672	-0.15527	NaN	NaN	NaN	NaN	NaN	NaN
1.208	13.8134	9.50046	20.0598876	0.072754	0.045898	-0.15479	39.072	168.525	372.5742	-0.069336	0.104	-0.18726	-19.9192	2.2893	20.5183	-0.31055	-0.0039063	-0.16016	NaN	NaN	NaN	NaN	NaN	NaN
1.21	21.995	5.6833	48.0529	0.077148	0.044922	-0.16357	34.269	169.25	307.494	-0.040039	0.077148	-0.18604	-59.5768	-1.36824	15.2471	-0.32275	0.024414	-0.17041	NaN	NaN	NaN	NaN	NaN	NaN
1.212	15.9416	-14.362	80.6547	0.078613	0.039551	-0.19336	41.813	131.5336	277.232	-0.010742	0.04248	-0.18311	-45.6024	-2.96386	59.4961	-0.33105	0.047852	-0.1748	NaN	NaN	NaN	NaN	NaN	NaN
1.214	21.172	-40.245	103.8939	0.074707	0.039063	-0.19824	59.11	150.8842	263.5019	0.0053711	0.023926	-0.18359	-36.706	41.91	26.8471	-0.33691	0.056152	-0.17529	NaN	NaN	NaN	NaN	NaN	NaN
1.216	34.8205	-23.674	135.05124	0.048828	0.049805	-0.21143	36.215	106.057	243.9716	0.037598	-0.003418	-0.18359	-35.9212	27.139	41.1284	-0.35889	0.075195	-0.18115	NaN	NaN	NaN	NaN	NaN	NaN
1.218	70.153	-12.661	192.5832	0.0058595	0.060546	-0.2168	2.9517	76.115	235.491	0.054932	-0.021973	-0.1809	-50.65495	20.301	33.33	-0.39306	0.095948	-0.17895	NaN	NaN	NaN	NaN	NaN	NaN
1.22	74.483	-17.137	257.326	-0.053223	0.078125	-0.23291	25.9554	107.8308	186.92248	0.067383	-0.041504	-0.1792	-69.108	-29.191	65.674	-0.42188	0.11914	-0.1748	NaN	NaN	NaN	NaN	NaN	NaN
1.222	84.267	-26.543	325.301	-0.16602	0.1001	-0.25781	-8.4732	74.5907	173.2673	0.085449	-0.068359	-0.17822	-66.878	-9.7014	27.41663	-0.47461	0.1499	-0.16504	NaN	NaN	NaN	NaN	NaN	NaN
1.224	115.4023	-9.5623	437.759	-0.23145	0.11865	-0.27344	8.7259	90.0259	176.938	0.09082	-0.077637	-0.17676	-45.4613	0.617999999999999	11.78628	-0.49658	0.16553	-0.16406	NaN	NaN	NaN	NaN	NaN	NaN
1.226	115.0895	8.8894	549.9177	-0.38818	0.15967	-0.29688	-6.28894	95.748	140.0985	0.10547	-0.095215	-0.17627	-26.04	33.1924	-24.801	-0.53516	0.19824	-0.1499	NaN	NaN	NaN	NaN	NaN	NaN
1.228	48.369	1.6865	668.524	-0.54101	0.21093	-0.31323	-28.2576	60.8283	124.87516	0.11279	-0.10644	-0.1687	-44.1764	2.2331	-0.443000000000001	-0.55615	0.22778	-0.13819	NaN	NaN	NaN	NaN	NaN	NaN
1.23	6.764	-13.3432	748.827	-0.71875	0.2749	-0.33105	11.3175	67.46037	110.8304	0.12012	-0.11816	-0.16895	-60.586	10.509	-10.4096	-0.56445	0.25293	-0.12012	NaN	NaN	NaN	NaN	NaN	NaN
1.232	8.589	-42.6443	813.416	-0.99756	0.39697	-0.35059	-24.451	22.864	100.0544	0.12354	-0.12646	-0.16797	-5.762	-8.82324	-15.1357	-0.54932	0.27734	-0.092285	NaN	NaN	NaN	NaN	NaN	NaN
1.234	-62.53	-39.325	886.0744	-1.1567	0.47314	-0.34717	6.7318	13.461	101.933	0.12451	-0.13281	-0.16846	0.0169999999999995	-2.674	-27.9584	-0.53467	0.28613	-0.082031	NaN	NaN	NaN	NaN	NaN	NaN
1.236	-98.036	-4.589	989.12	-1.5205	0.64746	-0.34961	26.7876	60.7844	73.156	0.12207	-0.13574	-0.1626	23.846	-24.6818	5.8414	-0.48535	0.29346	-0.066895	NaN	NaN	NaN	NaN	NaN	NaN
1.238	-101.349	24.5008	1065.636	-1.8003	0.79199	-0.35205	-3.3866	39.2378	32.0122	0.11719	-0.13183	-0.16064	13.653	9.8387	6.33374	-0.43628	0.28637	-0.053222	NaN	NaN	NaN	NaN	NaN	NaN
1.24	-117.039	-2.6953	1121.025	-2.082	0.93652	-0.35059	6.2069	59.8761	27.805	0.11084	-0.13184	-0.15771	12.558	9.8603	23.5218	-0.37744	0.27148	-0.045898	NaN	NaN	NaN	NaN	NaN	NaN
1.242	-158.9956	-51.155	1112.189	-2.4048	1.1313	-0.34082	23.0224	52.553	15.902	0.085938	-0.12402	-0.15283	30.86	44.8695	-22.535	-0.28955	0.23779	-0.037109	NaN	NaN	NaN	NaN	NaN	NaN
1.244	-170.94	-100.14	1117.21193	-2.5386	1.2427	-0.32861	1.052	10.9803	24.9283	0.072509	-0.12133	-0.14722	43.072	27.1239	11.1955	-0.24365	0.2168	-0.034668	NaN	NaN	NaN	NaN	NaN	NaN
1.246	-127.2742	-111.874	1186.71	-2.7339	1.5278	-0.28271	39.046	26.0564	26.6042	0.051758	-0.11182	-0.1416	40.144	33.24	6.2375	-0.1499	0.17627	-0.023438	NaN	NaN	NaN	NaN	NaN	NaN
1.248	-131.356	-74.656	1213.277	-2.8073	1.7834	-0.22192	24.476	-5.2974	16.2906	0.025391	-0.09668	-0.13379	25.3988	17.141	5.806	-0.096435	0.13818	-0.0097657	NaN	NaN	NaN	NaN	NaN	NaN
1.25	-146.5959	-34.8481	1185.825	-2.7988	1.9883	-0.17773	5.089	-16.3251	15.22472	0.0078125	-0.09082	-0.12842	59.296	50.1863	-14.332	-0.046387	0.104	-0.0083008	NaN	NaN	NaN	NaN	NaN	NaN
1.252	-162.91	-23.229	1120.266	-2.6323	2.0317	-0.18408	33.28363	3.5142	13.91067	-0.024902	-0.073242	-0.11914	27.1629	42.106	-12.795	0.028809	0.060547	-0.003418	NaN	NaN	NaN	NaN	NaN	NaN
1.254	-155.297	-40.325	1087.678	-2.6426	2.0313	-0.35938	13.114	-20.0159	1.9176	-0.044922	-0.058594	-0.11182	18.063	31.41874	-5.1634	0.0625	0.034668	-0.0039063	NaN	NaN	NaN	NaN	NaN	NaN
1.256	-160.9643	-52.784	1109.183	-2.3374	1.9341	-0.59131	29.0651	-0.09642	13.5295	-0.062988	-0.046387	-0.10205	-7.762	3.1992	17.6172	0.14111	-0.02002	-0.0039063	NaN	NaN	NaN	NaN	NaN	NaN
1.258	-151.56043	-57.388	1127.5191	-1.9637	1.7005	-0.55005	54.705	7.5921	-14.9906	-0.085449	-0.025879	-0.092285	-16.652	24.7033	-5.6841	0.19458	-0.063965	-0.0053711	NaN	NaN	NaN	NaN	NaN	NaN
1.26	-118.969	-67.449	1139.267	-1.646	1.4321	-0.48389	22.09279	-27.4732	3.6072	-0.092285	-0.01709	-0.089844	-13.4131	44.794	17.333	0.24805	-0.10303	-0.0073242	NaN	NaN	NaN	NaN	NaN	NaN
1.262	-121.45	-62.734	1127.255	-1.3706	1.1567	-0.45508	24.462	-0.9134	2.9555	-0.10205	-0.0039063	-0.081055	4.684	77.607	47.3288	0.30225	-0.15869	-0.0097656	NaN	NaN	NaN	NaN	NaN	NaN
1.264	-115.616	-76.952	1087.2806	-1.2671	1.0571	-0.46045	10.8271	-18.1838	-23.8181	-0.10962	-0.00097657	-0.064941	-48.2121	57.099	46.1015	0.3208	-0.18066	-0.010254	NaN	NaN	NaN	NaN	NaN	NaN
1.266	-96.027	-96.742	1061.1	-1.1089	0.93408	-0.48486	30.4777	-16.8428	-1.98348	-0.11133	0.0068359	-0.058594	-47.952	53.3651	40.4675	0.35205	-0.21875	-0.0092773	NaN	NaN	NaN	NaN	NaN	NaN
1.268	-39.8567	-112.716	1068.627	-1.0054	0.87158	-0.49658	32.0076	11.152	-9.11478	-0.10791	0.014648	-0.039551	-34.7108	22.662	5.086	0.36035	-0.23902	-0.011231	NaN	NaN	NaN	NaN	NaN	NaN
1.27	-2.913	-141.1952	1115.8977	-0.90332	0.8125	-0.49512	-12.60539	-15.2809	-7.487	-0.10693	0.014648	-0.039063	-48.3108	6.191	2.968	0.35742	-0.25342	-0.016602	NaN	NaN	NaN	NaN	NaN	NaN
1.272	16.2291	-156.7367	1135.6985	-0.75586	0.73047	-0.47852	-8.959	9.74993	6.0578	-0.098633	0.010254	-0.026367	-66.211	-14.0101	41.2281	0.34863	-0.26318	-0.0097656	NaN	NaN	NaN	NaN	NaN	NaN
1.274	41.4427	-198.292	1137.51	-0.68604	0.68359	-0.46777	-10.929	32.0094	-11.8188	-0.085938	0.011963	-0.021485	-50.487	-14.86	60.617	0.34473	-0.26318	-0.01123	NaN	NaN	NaN	NaN	NaN	NaN
1.276	32.3873	-221.224	1132.257	-0.55469	0.5957	-0.45215	-23.76356	11.9686	-3.945	-0.069336	0.0097656	-0.01416	-50.3681	-2.4793	40.953	0.3252	-0.26514	-0.01123	NaN	NaN	NaN	NaN	NaN	NaN
1.278	81.617	-210.544	1145.3811	-0.47461	0.51758	-0.43555	11.7261	31.283	9.3723	-0.043945	0.003418	-0.0097656	-44.88815	19.4185	25.3771	0.30835	-0.2605	-0.0061035	NaN	NaN	NaN	NaN	NaN	NaN
1.28	94.531	-195.813	1155.393	-0.41211	0.44238	-0.42188	-33.830436	6.6054	-18.0421	-0.030762	0.00097656	-0.0097656	-53.0285	1.0377	4.3913	0.29102	-0.25244	-0.012695	NaN	NaN	NaN	NaN	NaN	NaN
1.282	95.162	-174.3603	1145.815	-0.37109	0.35352	-0.41162	-28.81725	-4.254	-19.2622	-0.0058594	-0.011719	-0.0078125	-53.0969	0.0492000000000008	31.4996	0.27246	-0.24268	-0.012207	NaN	NaN	NaN	NaN	NaN	NaN
1.284	62.308	-172.4513	1167.3669	-0.3667	0.30908	-0.41455	20.3948	15.48311	-5.937	0.013428	-0.020508	-0.0036621	-23.917	5.21919	13.62855	0.26025	-0.24121	-0.0092773	NaN	NaN	NaN	NaN	NaN	NaN
1.286	80.833	-158.176	1209.1059	-0.39014	0.25781	-0.42334	-26.4493	-9.9969	-6.30327	0.029297	-0.030762	-0.0019531	0.541999999999998	12.3707	13.1219	0.24219	-0.23535	-0.0083008	NaN	NaN	NaN	NaN	NaN	NaN
1.288	100.246	-156.892	1248.4695	-0.42846	0.24658	-0.42945	-2.674	2.827	29.011	0.049316	-0.04834	-0.0053711	3.481	3.906	3.598	0.23536	-0.22509	-0.0073242	NaN	NaN	NaN	NaN	NaN	NaN
1.29	67.534	-159.796	1261.9052	-0.49219	0.26172	-0.42383	2.432	22.4075	10.1002	0.067871	-0.05127	-0.0058594	20.04	-17.0293	30.950578	0.22852	-0.21973	-0.0068359	NaN	NaN	NaN	NaN	NaN	NaN
1.292	75.606	-155.948	1271.9438	-0.61816	0.31348	-0.4082	-21.565	-0.631600000000001	-3.685	0.083496	-0.071289	-0.0024414	-12.174	-15.5364	-10.105	0.22461	-0.22217	-0.0043945	NaN	NaN	NaN	NaN	NaN	NaN
1.294	76.127	-140.425	1266.268	-0.69971	0.35303	-0.40088	16.474	31.342	12.1449	0.097657	-0.08252	-0.0026855	1.633	9.737	-7.003	0.21973	-0.2207	-0.0053711	NaN	NaN	NaN	NaN	NaN	NaN
1.296	53.092	-127.203	1256.726	-0.88818	0.46338	-0.38818	3.1571	19.3535	13.2294	0.11621	-0.097656	-0.0043945	50.21	46.6512	-36.799	0.2168	-0.21826	-0.016113	NaN	NaN	NaN	NaN	NaN	NaN
1.298	12.2612	-122.584	1271.5162	-1.0879	0.58301	-0.39307	-13.496	6.5279	13.5309	0.12793	-0.1123	-0.0053711	50.537	38.4869	17.37525	0.2085	-0.21631	-0.024902	NaN	NaN	NaN	NaN	NaN	NaN
1.3	33.106	-135.8102	1323.032	-1.187	0.64697	-0.39746	53.061	17.4733	-1.145	0.13867	-0.11523	-0.012695	38.392	13.9502	6.2888	0.19873	-0.20557	-0.028809	NaN	NaN	NaN	NaN	NaN	NaN
1.302	42.969	-143.589	1364.773	-1.3828	0.78223	-0.41211	22.1175	-12.3318	-4.207	0.146	-0.12549	-0.015625	26.51752	-4.9129	-8.1309	0.17236	-0.17969	-0.045898	NaN	NaN	NaN	NaN	NaN	NaN
1.304	-19.1682	-145.357	1369.541	-1.5156	0.90332	-0.43091	13.0339	13.1539	10.4017	0.15552	-0.13696	-0.015869	12.706	2.307	-35.463	0.16406	-0.16455	-0.052734	NaN	NaN	NaN	NaN	NaN	NaN
1.306	-30.242	-150.465	1339.977	-1.6382	1.0415	-0.43896	37.6661	30.164	11.75246	0.15576	-0.14404	-0.018066	18.3041	-8.2469	2.4154	0.14502	-0.13525	-0.056641	NaN	NaN	NaN	NaN	NaN	NaN
1.308	-8.7046	-143.312	1341.394	-1.793	1.2461	-0.44189	25.92419	16.286	10.2198	0.15039	-0.15527	-0.01709	17.185	-0.436500000000001	2.209	0.13696	-0.1184	-0.061035	NaN	NaN	NaN	NaN	NaN	NaN
1.31	13.821	-118.2576	1368.8977	-1.8687	1.3345	-0.44287	50.419	41.41	13.75	0.1499	-0.15869	-0.016113	0.954999999999998	20.9394	23.9889	0.12451	-0.09375	-0.062988	NaN	NaN	NaN	NaN	NaN	NaN
1.312	-6.3556	-112.18	1389.829	-2.0054	1.5103	-0.43506	22.9726	1.9579	0.2512	0.14551	-0.16309	-0.02002	2.364	50.9223	-25.8962	0.11084	-0.06543	-0.070801	NaN	NaN	NaN	NaN	NaN	NaN
1.314	-22.4627	-116.1682	1382.1247	-2.0935	1.6091	-0.43432	23.7768	-6.95118	32.057	0.14307	-0.1648	-0.022705	14.4222	58.481	10.524	0.10107	-0.057129	-0.071777	NaN	NaN	NaN	NaN	NaN	NaN
1.316	3.821	-118.5972	1380.8914	-2.1543	1.6699	-0.44727	42.8762	11.2331	25.2549	0.13574	-0.16406	-0.023438	-25.708	58.272	21.04	0.083008	-0.033203	-0.079102	NaN	NaN	NaN	NaN	NaN	NaN
1.318	20.0137	-97.2843	1376.8666	-2.1934	1.6816	-0.47754	5.634	-15.39831	-2.7784	0.13281	-0.15918	-0.023926	-53.393	35.8886	35.691	0.061767	-0.016113	-0.087403	NaN	NaN	NaN	NaN	NaN	NaN
1.32	24.9405	-86.1603	1380.11407	-2.1914	1.667	-0.49219	27.916	-9.5895	18.3226	0.13184	-0.15186	-0.025391	-45.522	45.8271	-3.067	0.039063	0.0039063	-0.09375	NaN	NaN	NaN	NaN	NaN	NaN
1.322	19.0953	-74.1773	1376.6291	-2.1694	1.6372	-0.51904	4.562	-14.4399	9.0242	0.12207	-0.14648	-0.023926	-37.058	40.053	8.79	0.018066	0.029297	-0.093262	NaN	NaN	NaN	NaN	NaN	NaN
1.324	62.796	-63.4952	1375.3506	-2.134	1.6185	-0.53711	-31.6952	-19.4536	16.8037	0.11622	-0.14184	-0.027099	-37.148	36.8242	18.3273	0.0073242	0.040039	-0.091797	NaN	NaN	NaN	NaN	NaN	NaN
1.326	56.381	-58.2265	1362.362	-2.0952	1.5942	-0.54395	25.6398	4.8427	13.8882	0.1123	-0.13379	-0.025879	-55.377	21.5343	51.204	-0.0073242	0.067871	-0.104	NaN	NaN	NaN	NaN	NaN	NaN
1.328	62.499	-73.249	1377.4444	-2.0054	1.564	-0.52881	6.8358	0.556500000000001	-6.3643	0.104	-0.12061	-0.038086	-69.84783	26.2176	18.17353	-0.015625	0.082276	-0.10327	NaN	NaN	NaN	NaN	NaN	NaN
1.33	67.777	-72.291	1387.1602	-1.959	1.5391	-0.52539	-18.6695	0.0208000000000004	9.667	0.098633	-0.11572	-0.038086	-53.051	27.1961	23.0102	-0.020996	0.098145	-0.10205	NaN	NaN	NaN	NaN	NaN	NaN
1.332	114.563	-57.301	1411.145	-1.875	1.4902	-0.5293	5.769	9.2481	15.3887	0.092285	-0.11182	-0.041992	-32.5374	36.4259	4.248	-0.031738	0.1167	-0.10693	NaN	NaN	NaN	NaN	NaN	NaN
1.334	114.531	-46.891	1411.6011	-1.8084	1.4436	-0.53491	-29.2936	-9.8712	1.1073	0.085937	-0.1001	-0.044922	-37.51386	9.36	37.0592	-0.030762	0.12891	-0.10791	NaN	NaN	NaN	NaN	NaN	NaN
1.336	63.244	-56.4963	1396.9353	-1.75	1.4092	-0.52734	2.322	-6.517	2.5937	0.077148	-0.092773	-0.053223	-33.961	23.4399	44.3865	-0.036621	0.14307	-0.10791	NaN	NaN	NaN	NaN	NaN	NaN
1.338	66.346	-60.3215	1409.61399	-1.6904	1.3496	-0.5166	1.9643	2.26495	0.00320000000000054	0.07373	-0.078613	-0.049805	-1.934	-16.302	83.38782	-0.03833	0.15723	-0.11548	NaN	NaN	NaN	NaN	NaN	NaN
1.34	106.572	-41.9623	1403.8	-1.6694	1.3228	-0.5166	-42.331	-15.0429	9.0475	0.069336	-0.075195	-0.057617	-23.319	-23.87	114.0555	-0.035156	0.16211	-0.12012	NaN	NaN	NaN	NaN	NaN	NaN
1.342	107.71	-25.5963	1412.022	-1.6436	1.2676	-0.50439	14.6957	11.19548	7.87649	0.061523	-0.05957	-0.067871	-28.87767	-15.1456	197.4935	-0.037109	0.16406	-0.13818	NaN	NaN	NaN	NaN	NaN	NaN
1.344	44.822	-20.72298	1394.472	-1.6316	1.2415	-0.49609	-13.9705	5.4517	-17.4382	0.060059	-0.049073	-0.068115	14.569	44.0845	269.796	-0.043212	0.17041	-0.15893	NaN	NaN	NaN	NaN	NaN	NaN
1.346	51.013	-28.3192	1388.1947	-1.6206	1.2153	-0.48486	-20.8191	-2.26922	-10.5077	0.053711	-0.036621	-0.069336	41.6655	45.863	393.5861	-0.057617	0.18652	-0.18213	NaN	NaN	NaN	NaN	NaN	NaN
1.348	74.161	-12.3671	1389.087	-1.603	1.1919	-0.47217	28.3637	-3.8092	-5.0941	0.045898	-0.022461	-0.072754	50.1318	77.955	541.357	-0.10986	0.21338	-0.19873	NaN	NaN	NaN	NaN	NaN	NaN
1.35	28.015	8.2287	1384.3773	-1.5879	1.1836	-0.46875	-15.7973	-22.7396	-14.25078	0.043457	-0.019531	-0.076172	47.503	72.199	725.178	-0.15088	0.22705	-0.20898	NaN	NaN	NaN	NaN	NaN	NaN
1.352	3.222	10.2203	1394.856	-1.5562	1.1704	-0.46045	35.9529	-16.3948	0.7031	0.03125	-0.010742	-0.077637	105.825	29.1602	925.658	-0.28613	0.26709	-0.22998	NaN	NaN	NaN	NaN	NaN	NaN
1.354	9.7679	20.399	1409.728	-1.532	1.1663	-0.45337	35.2468	6.0564	-14.0906	0.025634	-0.0061035	-0.082032	95.216	-50.4516	1127.649	-0.41553	0.30982	-0.25562	NaN	NaN	NaN	NaN	NaN	NaN
1.356	2.6939	31.623	1396.941	-1.5098	1.1602	-0.44629	2.11561	-0.9681	-3.0165	0.012695	-0.00097656	-0.088867	98.516	-66.192	1311.2742	-0.56738	0.37695	-0.27393	NaN	NaN	NaN	NaN	NaN	NaN
1.358	-49.209	46.118	1366.7445	-1.4839	1.1528	-0.43701	37.9614	10.6777	10.8654	0.00097656	0.0063477	-0.1001	84.592	-97.761	1440.3933	-0.81348	0.49219	-0.31836	NaN	NaN	NaN	NaN	NaN	NaN
1.36	-54.681	47.284	1342.4716	-1.4702	1.1411	-0.43604	30.1097	14.0371	-9.64887	-0.0058594	0.012207	-0.10986	54.431	-81.341	1544.233	-0.95508	0.57617	-0.33398	NaN	NaN	NaN	NaN	NaN	NaN
1.362	-36.6516	32.5861	1344.2892	-1.439	1.1157	-0.41357	23.3211	15.92633	1.801	-0.035645	0.026367	-0.12402	-10.384	-102.73	1579.797	-1.2891	0.78174	-0.36426	NaN	NaN	NaN	NaN	NaN	NaN
1.364	-46.68092	45.7423	1339	-1.4207	1.1018	-0.40503	47.679	11.043	21.8635	-0.079834	0.047852	-0.1128	-65.346	-115.19652	1585.103	-1.5869	0.97267	-0.36963	NaN	NaN	NaN	NaN	NaN	NaN
1.366	-64.522	35.456	1319.3591	-1.4038	1.0825	-0.39648	-3.765	-25.6092	69.9684	-0.14014	0.062988	-0.12939	-103.361	-166.805	1539.869	-1.9023	1.1738	-0.35254	NaN	NaN	NaN	NaN	NaN	NaN
1.368	-83.232	21.964	1308.2701	-1.3887	1.0586	-0.37842	16.8724	-24.2915	118.4599	-0.24609	0.095703	-0.14893	-118.076	-220.7	1532.598	-2.3354	1.4849	-0.26709	NaN	NaN	NaN	NaN	NaN	NaN
1.37	-37.8527	23.321	1307.0206	-1.3828	1.0459	-0.37549	38.7327	24.672	138.362	-0.30908	0.12158	-0.16211	-133.735	-288.7	1481.212	-2.5405	1.6489	-0.2251	NaN	NaN	NaN	NaN	NaN	NaN
1.372	-55.1753	46.429	1283.706	-1.3667	1.0083	-0.36475	11.2598	33.40097	225.709	-0.46631	0.17676	-0.18262	-145.521	-321.15	1433.521	-2.918	1.9941	-0.12988	NaN	NaN	NaN	NaN	NaN	NaN
1.374	-29.025	63.433	1251.789	-1.3526	0.97998	-0.35572	53.78	48.958	378.268	-0.60913	0.23829	-0.20069	-134.537	-294.455	1314.9375	-3.1111	2.2249	-0.12622	NaN	NaN	NaN	NaN	NaN	NaN
1.376	-21.554	62.2312	1236.8596	-1.3359	0.95117	-0.3457	-2.26906	69.08	499.023	-0.77588	0.31494	-0.21826	-155.2146	-260.018	1269.4132	-3.1851	2.4067	-0.18213	NaN	NaN	NaN	NaN	NaN	NaN
1.378	-2.116	66.01539	1231.7595	-1.3081	0.91064	-0.34229	64.806	47.2044	656.489	-1.0308	0.45508	-0.23926	-145.9124	-190.131	1231.5525	-2.9604	2.4595	-0.33936	NaN	NaN	NaN	NaN	NaN	NaN
1.38	-8.115	64.2467	1206.79191	-1.2974	0.89307	-0.33691	128.143	34.28	798.854	-1.2547	0.58667	-0.24683	-168.636	-125.611	1254.731	-2.7085	2.3794	-0.42383	NaN	NaN	NaN	NaN	NaN	NaN
1.382	-7.06	65.9174	1179.0062	-1.2769	0.86182	-0.33105	55.869	-1.162	971.108	-1.5039	0.73535	-0.24707	-176.719	-72.11	1228.287	-2.0347	2.0474	-0.56104	NaN	NaN	NaN	NaN	NaN	NaN
1.384	15.532	81.2071	1179.058	-1.2481	0.84864	-0.31616	52.54793	-30.806	1128.189	-1.8667	0.94385	-0.21826	-184.222	-80.8	1243.087	-1.5525	1.7542	-0.62525	NaN	NaN	NaN	NaN	NaN	NaN
1.386	25.6121	104.25	1158.407	-1.2241	0.82471	-0.31348	-2.7718	-35.731	1156.9908	-2.0503	1.0571	-0.19434	-169.411	-101.1	1240.257	-1.1582	1.4961	-0.68066	NaN	NaN	NaN	NaN	NaN	NaN
1.388	16.615	110.299	1124.876	-1.1899	0.79736	-0.30615	-37.119	-51.32	1206.227	-2.4219	1.3242	-0.12793	-182.315	-142.348	1282.82	-0.87061	1.2573	-0.74365	NaN	NaN	NaN	NaN	NaN	NaN
1.39	-3.113	109.939	1074.563	-1.1772	0.78369	-0.30029	-21.419	-59.954	1255.103	-2.6951	1.5686	-0.082519	-165.4612	-188.764	1273.247	-0.79492	1.168	-0.75391	NaN	NaN	NaN	NaN	NaN	NaN
1.392	33.64	113.9711	1072.9145	-1.1377	0.76367	-0.28564	-79.173	-73.4805	1286.173	-2.9487	1.8247	-0.057129	-144.121	-256.871	1282.213	-0.67432	1.0181	-0.78076	NaN	NaN	NaN	NaN	NaN	NaN
1.394	64.3328	114.1834	1064.096	-1.114	0.74829	-0.27613	-93.729	-127.574	1313.309	-3.1616	2.0981	-0.061035	-86.3422	-304.9874	1313.362	-0.55688	0.90307	-0.80835	NaN	NaN	NaN	NaN	NaN	NaN
1.396	31.8167	103.568	1038.1206	-1.0908	0.73242	-0.26953	-49.455	-154.909	1294.123	-3.1953	2.1738	-0.07959	-23.4375	-376.591	1392.2523	-0.4082	0.77344	-0.81836	NaN	NaN	NaN	NaN	NaN	NaN
1.398	-3	97.755	1021.47495	-1.0503	0.69971	-0.2583	-105.79878	-202.523	1280.384	-3.064	2.1548	-0.17285	16.966	-432.592	1418.693	-0.21973	0.61182	-0.80908	NaN	NaN	NaN	NaN	NaN	NaN
1.4	21.439	115.1366	999.9691	-1.0327	0.68408	-0.25293	-75.042	-236.517	1277.676	-2.7937	2.0217	-0.2771	34.415	-448.97	1453.9721	-0.14453	0.54346	-0.79834	NaN	NaN	NaN	NaN	NaN	NaN
1.402	25.215	116.7908	999.1949	-0.9917	0.65479	-0.2417	-23.461	-194.905	1213.293	-2.4351	1.8267	-0.37842	61.118	-439.399	1493.4421	-0.067383	0.44385	-0.76611	NaN	NaN	NaN	NaN	NaN	NaN
1.404	-46.051	124.377	974.899	-0.96265	0.63111	-0.23486	-52.259	-168.65	1158.402	-1.9253	1.5483	-0.46436	68.985	-412.272	1539.869	-0.087159	0.42212	-0.7312	NaN	NaN	NaN	NaN	NaN	NaN
1.406	-35.165	123.656	955.372	-0.93457	0.60547	-0.22412	-17.814	-107.151	1152.384	-1.7207	1.4219	-0.49609	68.3348	-383.531	1592.822	-0.16309	0.44434	-0.68945	NaN	NaN	NaN	NaN	NaN	NaN
1.408	-7.976	127.157	943.2118	-0.89404	0.57666	-0.21143	-91.837	-55.626	1116.378	-1.4067	1.2056	-0.53564	92.809	-316.3943	1610.195	-0.37061	0.53369	-0.64404	NaN	NaN	NaN	NaN	NaN	NaN
1.41	-78.257	125.0977	913.2186	-0.87256	0.55908	-0.20459	-110.55	-100.559	1132.0544	-1.2429	1.0803	-0.55786	126.513	-272.927	1624.328	-0.50244	0.61182	-0.63525	NaN	NaN	NaN	NaN	NaN	NaN
1.412	-98.416	122.5603	882.2306	-0.8335	0.52783	-0.19678	-55.074	-119.346	1126.935	-1.1011	0.97656	-0.58154	123.561	-231.051	1628.026	-0.79297	0.79883	-0.61816	NaN	NaN	NaN	NaN	NaN	NaN
1.414	-47.0267	130.991	838.282	-0.80469	0.50171	-0.19385	-103.4968	-174.63	1142.0342	-0.90771	0.82666	-0.62549	116.471	-198.73	1646.922	-0.999	0.93262	-0.63232	NaN	NaN	NaN	NaN	NaN	NaN
1.416	-43.182	137.816	824.7285	-0.77295	0.48584	-0.18945	-98.6474	-233.7833	1178.9986	-0.79932	0.75342	-0.64111	103.08	-142.851	1628.0058	-1.1758	1.0527	-0.64844	NaN	NaN	NaN	NaN	NaN	NaN
1.418	-89.735	131.364	791.4924	-0.73535	0.45605	-0.17773	-65.9913	-233.381	1144.107	-0.59326	0.60791	-0.64014	113.979	-107.403	1624.257	-1.3511	1.1997	-0.67627	NaN	NaN	NaN	NaN	NaN	NaN
1.42	-86.6052	124.3859	775.2463	-0.71777	0.44629	-0.17334	-58.8382	-276.5428	1162.915	-0.45386	0.51855	-0.63403	119.545	-96.157	1628.358	-1.4258	1.2656	-0.69141	NaN	NaN	NaN	NaN	NaN	NaN
1.422	-41.141	147.6416	764.0221	-0.68066	0.41797	-0.16553	-5.6773	-286.079	1213.4113	-0.3418	0.44922	-0.62207	90.881	-147.616	1667.237	-1.5562	1.3853	-0.75244	NaN	NaN	NaN	NaN	NaN	NaN
1.424	-47.5192	160.3933	756.417	-0.64819	0.40015	-0.15967	-4.4287	-295.633	1200.803	-0.25684	0.39014	-0.58984	47.8601	-170.5271	1691.177	-1.6726	1.4866	-0.79761	NaN	NaN	NaN	NaN	NaN	NaN
1.426	-69.951	156.8023	714.5905	-0.62451	0.38477	-0.15088	3.30997	-361.196	1269.716	-0.24512	0.36963	-0.57764	37.793	-198.867	1767.378	-1.8086	1.6035	-0.83594	NaN	NaN	NaN	NaN	NaN	NaN
1.428	-46.0842	142.6374	689.7798	-0.59131	0.36279	-0.14307	32.2535	-341.324	1340.603	-0.27734	0.34229	-0.57568	-12.498	-166.061	1778.679	-2.0503	1.8208	-0.88232	NaN	NaN	NaN	NaN	NaN	NaN
1.43	-29.1823	152.862	673.468	-0.57227	0.35059	-0.13623	0.951999999999998	-347.238	1385.03248	-0.34912	0.34619	-0.57666	-28.3664	-165.734	1821.984	-2.189	1.936	-0.89795	NaN	NaN	NaN	NaN	NaN	NaN
1.432	-44.72411	160.611	649.2502	-0.54053	0.3335	-0.12891	29.524	-335.598	1461.918	-0.44092	0.37109	-0.57813	-38.7096	-139.034	1833.361	-2.4434	2.168	-0.92773	NaN	NaN	NaN	NaN	NaN	NaN
1.434	-36.85	142.3773	622.87669	-0.50342	0.31787	-0.11816	57.604	-257.9263	1422.554	-0.62305	0.4668	-0.56641	-38.775	-152.618	1861.55	-2.583	2.3115	-0.94433	NaN	NaN	NaN	NaN	NaN	NaN
1.436	16.811	140.994	606.6239	-0.48291	0.30615	-0.11914	19.1658	-256.45	1437.54	-0.73438	0.53027	-0.55469	-37.1098	-114.194	1881.173	-2.6465	2.4082	-0.95508	NaN	NaN	NaN	NaN	NaN	NaN
1.438	40.668	143.4004	590.8282	-0.45166	0.2876	-0.10791	50.239	-223.485	1478.925	-0.97266	0.67773	-0.53906	-45.5192	-104.978	1898.114	-2.5781	2.4023	-0.96289	NaN	NaN	NaN	NaN	NaN	NaN
1.44	22.835	142.3377	555.1381	-0.42847	0.27417	-0.10132	23.2873	-188.588	1443.014	-1.1474	0.78564	-0.54541	-55.428	-52.663	1854.896	-2.4941	2.3438	-0.96875	NaN	NaN	NaN	NaN	NaN	NaN
1.442	34.155	133.88782	533.4487	-0.40674	0.26221	-0.096191	51.063	-209.045	1487.253	-1.3101	0.89307	-0.56299	-53.023	-36.695	1822.058	-2.3237	2.2212	-0.95947	NaN	NaN	NaN	NaN	NaN	NaN
1.444	53.8553	146.71	537.595	-0.37549	0.24805	-0.089355	86.226	-168.14	1516.052	-1.5078	1.0381	-0.61572	-39.6747	18.842	1772.861	-2.2647	2.2261	-0.95069	NaN	NaN	NaN	NaN	NaN	NaN
1.446	69.946	153.5251	540.408	-0.3623	0.23633	-0.080566	40.8586	-203.549	1516.996	-1.6147	1.1177	-0.65186	-48.117	35.251	1763.09	-2.2637	2.2754	-0.9541	NaN	NaN	NaN	NaN	NaN	NaN
1.448	38.9845	136.3496	505.53	-0.33594	0.22656	-0.073242	57.076	-225.4216	1566.3762	-1.8242	1.3164	-0.70215	11.2629	72.884	1781.547	-2.3047	2.3438	-0.92578	NaN	NaN	NaN	NaN	NaN	NaN
1.45	29.40302	128.136	469.8921	-0.31568	0.21363	-0.065674	60.86	-188.181	1551.3611	-2.0115	1.4739	-0.719	23.003	62.246	1793.87929	-2.2969	2.3613	-0.89258	NaN	NaN	NaN	NaN	NaN	NaN
1.452	42.9632	132.472	468.2989	-0.29492	0.20654	-0.05957	28.998	-229.314	1588.319	-2.2183	1.6323	-0.73193	9.593	93.815	1746.926	-2.1909	2.3286	-0.84131	NaN	NaN	NaN	NaN	NaN	NaN
1.454	30.00351	150.915	438.626	-0.26758	0.19678	-0.048828	60.624	-199.8637	1640.895	-2.4863	1.8262	-0.73145	36.7726	105.506	1735.579	-2.061	2.2183	-0.84912	NaN	NaN	NaN	NaN	NaN	NaN
1.456	-10.361	155.102	406.11596	-0.25488	0.19238	-0.04248	19.8058	-169.16542	1659.622	-2.6094	1.9141	-0.73438	39.489	138.292	1711.077	-1.9253	2.0825	-0.8667	NaN	NaN	NaN	NaN	NaN	NaN
1.458	2.116	143.229	395.32	-0.22021	0.19043	-0.029785	-9.4948	-198.714	1695.373	-2.7808	2.0474	-0.74365	67.179	121.348	1747.628	-1.7832	1.9121	-0.89258	NaN	NaN	NaN	NaN	NaN	NaN
1.46	7.385	124.3814	385.2515	-0.20093	0.18823	-0.031739	31.104	-166.8774	1708.191	-2.8208	2.0845	-0.75611	90.3824	110.158	1759.44385	-1.7236	1.8438	-0.90625	NaN	NaN	NaN	NaN	NaN	NaN
1.462	-8.686	103.14	367.4466	-0.18359	0.18213	-0.020996	19.2839	-185.012	1698.337	-2.7813	2.082	-0.75293	95.483	65.298	1771.268	-1.6367	1.7539	-0.91992	NaN	NaN	NaN	NaN	NaN	NaN
1.464	-45.5327	99.36	345.7562	-0.15869	0.18359	-0.016602	25.9707	-205.533	1724.807	-2.6948	2.0298	-0.75342	88.228	74.3224	1750.964	-1.5879	1.7222	-0.91602	NaN	NaN	NaN	NaN	NaN	NaN
1.466	-14.376	120.4105	340.957	-0.14453	0.18164	-0.015137	64.238	-131.4072	1687.4414	-2.7031	2.043	-0.79883	82.617	34.0076	1747.031	-1.5532	1.7153	-0.91357	NaN	NaN	NaN	NaN	NaN	NaN
1.468	-19.8958	126.9419	313.4854	-0.11621	0.17236	-0.0043945	32.587	-144.129	1653.6401	-2.6499	2.0981	-0.84521	102.823	42.584	1710.715	-1.5273	1.7266	-0.90625	NaN	NaN	NaN	NaN	NaN	NaN
1.47	-56.7949	124.6676	283.353	-0.10156	0.17066	-6.9389e-15	32.1485	-114.9928	1697.8601	-2.5762	2.0928	-0.81104	109.871	34.613	1672.59	-1.5132	1.7349	-0.90186	NaN	NaN	NaN	NaN	NaN	NaN
1.472	-77.662	114.7573	258.8955	-0.086426	0.16309	0.0058594	26.0955	-65.066	1672.216	-2.4956	2.0806	-0.76123	90.0252	72.231	1602.906	-1.4805	1.7168	-0.88281	NaN	NaN	NaN	NaN	NaN	NaN
1.474	-36.8971	98.5244	265.1221	-0.068359	0.15869	0.013184	30.383	-96.31	1700.141	-2.3354	2.0278	-0.72021	45.3779	83.042	1587.6561	-1.4253	1.686	-0.86768	NaN	NaN	NaN	NaN	NaN	NaN
1.476	-41.62285	108.7228	264.1605	-0.056641	0.15186	0.01416	69.982	-34.034	1688.0329	-2.2402	1.9785	-0.7168	26.867	129.633	1548.187	-1.3862	1.6646	-0.86475	NaN	NaN	NaN	NaN	NaN	NaN
1.478	-74.89	109.5614	234.197	-0.039551	0.14648	0.017578	44.4518	-46.67	1668.507	-2.0581	1.8325	-0.70459	-20.7604	143.367	1526.852	-1.3042	1.604	-0.84717	NaN	NaN	NaN	NaN	NaN	NaN
1.48	-45.02905	108.917	220.282	-0.028809	0.13599	0.019776	35.0348	-52.394	1709.7072	-1.947	1.7229	-0.69238	-26.435	209.182	1475.818	-1.2495	1.5562	-0.82764	NaN	NaN	NaN	NaN	NaN	NaN
1.482	-18.115	108.7336	209.4855	-0.016113	0.13379	0.019531	59.1	-0.896000000000001	1674.052	-1.8569	1.6216	-0.67529	-48.353	214.735	1445.7908	-1.2041	1.5137	-0.80469	NaN	NaN	NaN	NaN	NaN	NaN
1.484	-29.0822	106.2515	196.4418	-0.0024414	0.11621	0.030273	36.918	-44.3753	1670.0627	-1.7754	1.498	-0.66016	-52.487	247.775	1384.5017	-1.168	1.459	-0.76953	NaN	NaN	NaN	NaN	NaN	NaN
1.486	-14.356	100.5647	171.75943	0.0014648	0.11719	0.033691	89.336	-35.9378	1709.01	-1.75	1.4453	-0.65332	-105.6624	224.086	1346.9288	-1.1523	1.4395	-0.75586	NaN	NaN	NaN	NaN	NaN	NaN
1.488	13.884	75.289	162.97047	0.0092773	0.10938	0.034668	85.631	-40.376	1679.8178	-1.7207	1.375	-0.64453	-131.9059	246.741	1280.332	-1.1162	1.4004	-0.7168	NaN	NaN	NaN	NaN	NaN	NaN
1.49	35.7353	78.163	158.47671	0.016113	0.10791	0.036865	76.311	-87.561	1704.87	-1.7087	1.3469	-0.63257	-134.14	222.8867	1259.364	-1.0884	1.3746	-0.6875	NaN	NaN	NaN	NaN	NaN	NaN
1.492	27.23931	81.2171	149.9728	0.020996	0.099609	0.038086	108.672	-23.502	1707.706	-1.7031	1.3262	-0.62598	-114.085	228.323	1213	-1.0557	1.3457	-0.65918	NaN	NaN	NaN	NaN	NaN	NaN
1.494	22.5386	76.5199	123.7854	0.025391	0.098145	0.043457	65.009	-21.9025	1667.5604	-1.707	1.3135	-0.60938	-112.701	188.6774	1195.221	-0.99951	1.2954	-0.60889	NaN	NaN	NaN	NaN	NaN	NaN
1.496	24.525	71.2595	119.1531	0.023926	0.09375	0.04834	107.33	-19.0792	1674.546	-1.7007	1.3091	-0.59912	-121.01174	228.618	1153.421	-0.97021	1.2642	-0.59326	NaN	NaN	NaN	NaN	NaN	NaN
1.498	44.1336	70.876	125.3296	0.028809	0.087402	0.044922	89.491	8.9725	1618.04429	-1.6968	1.2954	-0.57861	-138.512	210.5955	1099.935	-0.88818	1.1831	-0.55127	NaN	NaN	NaN	NaN	NaN	NaN
1.5	53.967	75.507	120.799	0.026611	0.083984	0.047607	42.237	-18.5229	1590.6254	-1.6865	1.2881	-0.56299	-142.402	254.376	1048.739	-0.82397	1.1135	-0.52124	NaN	NaN	NaN	NaN	NaN	NaN
1.502	21.576	73.781	125.1921	0.025391	0.083496	0.052246	75.265	31.3202	1606.2581	-1.6753	1.2778	-0.55029	-164.032	227.1588	1041.486	-0.75537	1.0356	-0.49365	NaN	NaN	NaN	NaN	NaN	NaN
1.504	30.5073	61.6099	108.4009	0.018555	0.081543	0.049316	56.216	74.665	1578.7614	-1.6616	1.2642	-0.53271	-131.4767	255.212	991.414	-0.68066	0.93164	-0.4502	NaN	NaN	NaN	NaN	NaN	NaN
1.506	37.0163	59.50715	89.6881	0.024902	0.079102	0.054199	31.3024	57.23744	1571.967	-1.6558	1.2524	-0.52197	-116.2189	235.7085	954.472	-0.64404	0.88135	-0.42725	NaN	NaN	NaN	NaN	NaN	NaN
1.508	40.0609	63.6157	77.522	0.021973	0.077148	0.05957	46.147	112.366	1552.982	-1.6245	1.2222	-0.50488	-69.015	298.3575	898.762	-0.59131	0.7876	-0.39355	NaN	NaN	NaN	NaN	NaN	NaN
1.51	1.8	56.1492	58.8275	0.019776	0.071778	0.056152	10.47991	104.5744	1494.6208	-1.5945	1.1936	-0.49585	-51.283	286.801	866.306	-0.55737	0.72143	-0.36548	NaN	NaN	NaN	NaN	NaN	NaN
1.512	7.666	51.3335	47.7399	0.023438	0.066406	0.056641	14.6535	98.1182	1472.3147	-1.5566	1.1641	-0.48633	-37.396	335.215	838.0053	-0.51953	0.66309	-0.33545	NaN	NaN	NaN	NaN	NaN	NaN
1.514	5.4731	51.3626	47.0596	0.024902	0.064941	0.060547	36.4868	131.614	1422.821	-1.5034	1.1235	-0.47021	-36.121	293.682	766.33272	-0.4707	0.5918	-0.30176	NaN	NaN	NaN	NaN	NaN	NaN
1.516	-20.184	52.51216	51.773	0.033691	0.063965	0.061523	-36.53589	96.2273	1406.78549	-1.4634	1.0943	-0.45971	-27.858	304.052	708.945019	-0.44385	0.55957	-0.28223	NaN	NaN	NaN	NaN	NaN	NaN
1.518	-43.59655	45.6793	63.992	0.039551	0.057617	0.068848	-7.677	105.5746	1410.6959	-1.4199	1.0664	-0.44434	4.846	234.981	661.4013	-0.39258	0.49609	-0.25098	NaN	NaN	NaN	NaN	NaN	NaN
1.52	-17.642	30.51121	59.2275	0.046631	0.055908	0.072021	-9.3176	116.0217	1353.845	-1.3589	1.0073	-0.42676	7.879	249.163	644.191	-0.34107	0.44385	-0.22632	NaN	NaN	NaN	NaN	NaN	NaN
1.522	-23.5056	38.33988	51.5633	0.053711	0.046387	0.076172	-55.29	87.457	1346.8205	-1.3223	0.97461	-0.41992	-9.088	206.941	599.5551	-0.29297	0.39063	-0.2085	NaN	NaN	NaN	NaN	NaN	NaN
1.524	-57.177	43.3392	23.58	0.064941	0.040527	0.081543	-24.269	130.5282	1326.4503	-1.25	0.91797	-0.39648	-12.073	248.739	542.3787	-0.22754	0.32813	-0.17383	NaN	NaN	NaN	NaN	NaN	NaN
1.526	-74.437	27.9137	6.038	0.069336	0.037598	0.083008	-61.8337	142.1182	1290.5701	-1.1984	0.87475	-0.38208	-18.724	202.9279	487.6347	-0.19189	0.29736	-0.1582	NaN	NaN	NaN	NaN	NaN	NaN
1.528	-31.5601	19.1486	8.2071	0.07959	0.025391	0.086426	-36.68732	161.4939	1258.111	-1.1484	0.83789	-0.36816	-24.332	231.2553	458.946	-0.12842	0.23389	-0.12891	NaN	NaN	NaN	NaN	NaN	NaN
1.53	-37.3133	26.096	29.8479	0.088623	0.018799	0.090576	-27.75151	200.005	1223.5795	-1.0918	0.79102	-0.34326	-13.619	184.2247	439.42	-0.086426	0.18799	-0.11011	NaN	NaN	NaN	NaN	NaN	NaN
1.532	-41.1845	26.2747	17.1776	0.096191	0.012695	0.09668	-44.8472	174.781	1188.3454	-1.0635	0.76953	-0.3291	-5.98099999999999	232.428	428.021	-0.043945	0.14258	-0.091797	NaN	NaN	NaN	NaN	NaN	NaN
1.534	-38.4389	9.9499	17.2719	0.10498	0.0068359	0.10303	2.712	160.9429	1182.266	-1.0156	0.73047	-0.31055	15.437	187.652	385.778	0.00097656	0.09668	-0.06543	NaN	NaN	NaN	NaN	NaN	NaN
1.536	-6.3235	15.2038	21.0565	0.10254	0.0029297	0.10498	-6.672	177.6668	1126.128	-0.98535	0.69678	-0.29077	-24.1993	201.863	327.95	0.019531	0.07666	-0.053711	NaN	NaN	NaN	NaN	NaN	NaN
1.538	-0.442999999999998	34.7412	10.5833	0.10938	-0.00048828	0.10791	-23.885	168.027	1100.1884	-0.95068	0.6626	-0.27197	-58.604	120.912	282.06	0.039551	0.038574	-0.023926	NaN	NaN	NaN	NaN	NaN	NaN
1.54	-3.984	32.6965	17.6028	0.11084	-0.008789	0.11401	-0.208000000000006	196.6004	1065.909	-0.89844	0.62305	-0.24805	-90.9788	140.433	225.794	0.050782	0.013916	-0.011475	NaN	NaN	NaN	NaN	NaN	NaN
1.542	5.791	11.8376	20.0094	0.11572	-0.0087891	0.11572	-24.75	199.003	1016.4266	-0.86719	0.60254	-0.2373	-76.929	107.852	152.8447	0.047852	-0.0024414	0.0043945	NaN	NaN	NaN	NaN	NaN	NaN
1.544	26.9946	2.7313	13.51387	0.11768	-0.019531	0.11768	-15.505	180.117	993.604	-0.80566	0.56445	-0.2124	-75.4026	164.238	137.912	0.030273	-0.0058594	0.021484	NaN	NaN	NaN	NaN	NaN	NaN
1.546	40.3911	8.0487	5.935457	0.11816	-0.02002	0.12061	8.527	208.06	961.3253	-0.75488	0.52734	-0.20019	-91.8524	121.232	108.595	0.0078125	-0.0083008	0.032715	NaN	NaN	NaN	NaN	NaN	NaN
1.548	27.9564	-0.867000000000001	14.7986	0.11768	-0.032715	0.11523	-25.2377	188.287	915.59	-0.70068	0.49365	-0.18213	-97.257	148.9878	111.923	-0.037598	0.0043945	0.04541	NaN	NaN	NaN	NaN	NaN	NaN
1.55	30.205	3.321	8.5277	0.12158	-0.03418	0.1128	14.832	181.6377	886.247	-0.63135	0.44238	-0.15479	-96.304	113.03	57.963	-0.08618	0.018555	0.061523	NaN	NaN	NaN	NaN	NaN	NaN
1.552	52.8797	17.6659	23.7396	0.12207	-0.03418	0.11133	-10.507	207.6695	846.6262	-0.59766	0.41553	-0.14502	-92.116	125.157	42.163	-0.13428	0.039063	0.071289	NaN	NaN	NaN	NaN	NaN	NaN
1.554	65.39	22.6164	19.1677	0.12451	-0.034668	0.10645	-60.731	190.687	816.217	-0.52783	0.36133	-0.11914	-62.2722	75.115	19.745	-0.20752	0.067871	0.091309	NaN	NaN	NaN	NaN	NaN	NaN
1.556	29.6742	5.5641	6.9985	0.12646	-0.036621	0.1084	21.163	212.8301	795.746	-0.47754	0.31934	-0.095457	-51.572	88.902	65.7887	-0.23779	0.080078	0.093262	NaN	NaN	NaN	NaN	NaN	NaN
1.558	53.8616	3.72272	12.9216431	0.12012	-0.02832	0.1001	-14.844	200.5682	749.4081	-0.42871	0.27588	-0.080078	-46.254	61.41237	21.0715	-0.30225	0.11182	0.10547	NaN	NaN	NaN	NaN	NaN	NaN
1.56	54.157	12.5851	18.6827	0.11597	-0.027588	0.096191	-7.117	172.8615	722.238	-0.36768	0.21924	-0.066895	-38.021	82.758	14.164	-0.34472	0.14038	0.1106	NaN	NaN	NaN	NaN	NaN	NaN
1.562	36.5701	15.9975	23.8545	0.11133	-0.019043	0.09375	2.942	192.75	676.163	-0.33643	0.19824	-0.058594	-14.535	50.9964	-8.2187	-0.38232	0.16846	0.1167	NaN	NaN	NaN	NaN	NaN	NaN
1.564	12.1562	11.1993	14.5713	0.10254	-0.0087891	0.087402	-66.6502	180.9432	609.718	-0.27441	0.14404	-0.050293	-15.737	47.113	28.7441	-0.42578	0.19873	0.12061	NaN	NaN	NaN	NaN	NaN	NaN
1.566	9.356	10.78731	13.3952	0.097656	-0.0048828	0.086426	-18.428	169.641	577.6134	-0.23194	0.11206	-0.032715	8.912	30.3745	18.2821	-0.44189	0.21289	0.12549	NaN	NaN	NaN	NaN	NaN	NaN
1.568	13.9996	20.3718	20.3099	0.081543	0.01123	0.081055	-43.982	184.8217	534.788	-0.19141	0.083496	-0.02832	29.914	37.476	13.694	-0.48633	0.24512	0.12646	NaN	NaN	NaN	NaN	NaN	NaN
1.57	-16.216	15.1273	18.9115	0.064453	0.024414	0.07373	-71.4968	125.541	495.173	-0.14502	0.05127	-0.01123	42.8308	21.7439	-7.63	-0.51611	0.26123	0.12036	NaN	NaN	NaN	NaN	NaN	NaN
1.572	-27.28294	7.68505	33.1467	0.057617	0.037598	0.067871	-7.802	139.552	464.944	-0.12451	0.038086	-0.015137	59.821	1.909	37.52623	-0.54883	0.28906	0.12061	NaN	NaN	NaN	NaN	NaN	NaN
1.574	-28.28666	-17.92174	55.5626	0.044922	0.058105	0.05127	-52.2123	159.5573	418.623	-0.087891	0.0097656	-0.0024414	46.584	-11.7473	32.3213	-0.57666	0.31836	0.11768	NaN	NaN	NaN	NaN	NaN	NaN
1.576	-32.8574	-31.95457	51.271	0.032471	0.073974	0.041504	-48.7915	152.9743	403.394	-0.06958	-0.0046385	0.0043945	36.401	-3.4571	48.554	-0.59131	0.33691	0.11084	NaN	NaN	NaN	NaN	NaN	NaN
1.578	-32.5745	-43.50884	54.1135	0.013184	0.087402	0.033203	-24.428	188.049	369.142	-0.056641	-0.021484	0.012695	80.5703	34.12	15.8897	-0.60547	0.3667	0.10889	NaN	NaN	NaN	NaN	NaN	NaN
1.58	-33.5676	-50.1379	68.79344	-0.019043	0.1084	0.02002	-59.107	172.719	317.217	-0.044434	-0.043945	0.012695	60.8031	44.476	50.0023	-0.61133	0.37842	0.11231	NaN	NaN	NaN	NaN	NaN	NaN
1.582	-19.8804	-55.82284	112.9147	-0.041504	0.11523	0.016113	2.801	142.9042	283.54732	-0.041992	-0.047852	0.022949	43.2132	69.99	43.00908	-0.60107	0.38428	0.11133	NaN	NaN	NaN	NaN	NaN	NaN
1.584	-64.9099	-51.9665	167.2627	-0.091309	0.13965	-0.018555	-19.7664	149.9774	246.994	-0.038086	-0.056152	0.025879	31.495	52.327	47.9619	-0.57813	0.37891	0.12207	NaN	NaN	NaN	NaN	NaN	NaN
1.586	-88.9768	-45.1959	215.4784	-0.14233	0.1543	-0.051269	-30.6704	110.903	242.668	-0.037597	-0.057373	0.032959	28.045	69.138	20.1868	-0.55713	0.37061	0.13086	NaN	NaN	NaN	NaN	NaN	NaN
1.588	-67.9533	-34.297	323.285	-0.20068	0.17822	-0.087402	25.5312	124.975	242.5268	-0.040527	-0.062988	0.050781	-11.073	5.7094	24.646	-0.50537	0.34277	0.14697	NaN	NaN	NaN	NaN	NaN	NaN
1.59	-47.952	-5.7072	435.724	-0.29785	0.21875	-0.14063	-25.684	136.5947	197.8893	-0.051758	-0.055664	0.048828	-11.006	-3.76	9.052	-0.46241	0.31421	0.15503	NaN	NaN	NaN	NaN	NaN	NaN
1.592	-64.799	-8.4458	535.351	-0.35742	0.24512	-0.16162	17.9304	121.1486	161.401	-0.053711	-0.050781	0.048828	-36.834	-40.3741	35.268	-0.40771	0.27979	0.16357	NaN	NaN	NaN	NaN	NaN	NaN
1.594	-73.221	-25.7506	600.465	-0.49854	0.30713	-0.19775	25.8665	138.252	137.7055	-0.0625	-0.041992	0.05957	-34.208	12.2066	4.84872	-0.31543	0.22266	0.16699	NaN	NaN	NaN	NaN	NaN	NaN
1.596	-32.44	-52.108	668.196	-0.63086	0.36377	-0.22656	-10.131	115.561	129.0453	-0.071045	-0.034668	0.067138	-44.4696	-11.449	0.696000000000002	-0.27148	0.19482	0.17578	NaN	NaN	NaN	NaN	NaN	NaN
1.598	-12.649	-48.608	740.2794	-0.7749	0.43896	-0.24609	64.326	88.5233	133.118	-0.082031	-0.025879	0.067383	-61.8082	13.062	14.17756	-0.18359	0.13428	0.17676	NaN	NaN	NaN	NaN	NaN	NaN
1.6	18.926	-24.432	815.619	-0.99219	0.56348	-0.25342	9.6772	100.609	111.739	-0.088379	-0.022461	0.073242	-76.6547	-47.8885	13.3686	-0.11548	0.090331	0.17603	NaN	NaN	NaN	NaN	NaN	NaN
1.602	16.6545	-24.691	859.697	-1.1113	0.62695	-0.2583	23.851	66.646	104.462	-0.095215	-0.024414	0.077148	-71.9515	0.487000000000002	-5.4843	-0.052734	0.041016	0.17236	NaN	NaN	NaN	NaN	NaN	NaN
1.604	62.455	-47.2985	873.486	-1.3613	0.77734	-0.25977	61.552	52.687	100.31655	-0.10352	-0.014648	0.085938	-64.162	-28.0752	4.3009	0.046875	-0.038086	0.1748	NaN	NaN	NaN	NaN	NaN	NaN
1.606	81.2765	-61.222	896.975	-1.5337	0.89648	-0.25196	19.748	78.2301	60.7234	-0.10767	-0.010254	0.091064	-56.4416	26.1673	2.81687	0.12232	-0.10254	0.1748	NaN	NaN	NaN	NaN	NaN	NaN
1.608	77.9024	-78.733	927.3	-1.6929	1.02	-0.23584	36.5768	66.5268	40.2377	-0.10547	-0.003418	0.095703	-43.7168	-29.117	33.094	0.19482	-0.16357	0.1792	NaN	NaN	NaN	NaN	NaN	NaN
1.61	78.2822	-94.466	974.38	-1.8765	1.1938	-0.21436	39.6979	90.71	25.5487	-0.11035	0.011719	0.094727	-83.0414	17.42482	-5.842	0.28662	-0.24658	0.17969	NaN	NaN	NaN	NaN	NaN	NaN
1.612	101.687	-98.55	1013.029	-1.9531	1.2773	-0.20068	2.7174	88.491	20.2975	-0.1084	0.016602	0.10254	-81.437	-19.68699	-33.5358	0.32422	-0.28076	0.18359	NaN	NaN	NaN	NaN	NaN	NaN
1.614	120.65	-99.643	1013.925	-2.0679	1.4282	-0.18311	31.72336	32.5229	52.653	-0.11377	0.030762	0.1001	-29.38	62.7603	-22.3215	0.38672	-0.34766	0.18262	NaN	NaN	NaN	NaN	NaN	NaN
1.616	112.603	-112.7722	995.447	-2.1052	1.5061	-0.19018	10.0264	30.724	28.8622	-0.11426	0.035889	0.099853	-13.289	23.2509	6.093	0.42359	-0.38452	0.18433	NaN	NaN	NaN	NaN	NaN	NaN
1.618	113.146	-99.161	1018.1234	-2.0952	1.5454	-0.21045	-21.1834	2.287	12.1882	-0.11768	0.04248	0.099609	3.927	78.94	11.08	0.45508	-0.42188	0.18311	NaN	NaN	NaN	NaN	NaN	NaN
1.62	112.764	-53.841	1023.15402	-1.9863	1.5098	-0.23779	34.932	0.138800000000001	30.6505	-0.11328	0.043457	0.10059	16.982	21.6166	-9.0278	0.46924	-0.44678	0.17627	NaN	NaN	NaN	NaN	NaN	NaN
1.622	97.439	-17.507	1029.7678	-1.9023	1.4648	-0.25244	-40.027	36.5394	5.8275	-0.10596	0.038574	0.10254	20.156	60.3	-22.5581	0.4751	-0.4585	0.17285	NaN	NaN	NaN	NaN	NaN	NaN
1.624	85.395	-22.398	1022.2589	-1.7065	1.3677	-0.26025	-22.6484	5.497	-4.6882	-0.09375	0.037109	0.10059	32.1494	-6.551	-17.3947	0.45947	-0.44873	0.17285	NaN	NaN	NaN	NaN	NaN	NaN
1.626	32.555	-58.787	1014.194	-1.573	1.3025	-0.26221	7.616	23.0834	-14.7955	-0.080078	0.029785	0.09668	44.219	35.5432	17.68411	0.44116	-0.44605	0.17896	NaN	NaN	NaN	NaN	NaN	NaN
1.628	54.146	-99.0355	1007.117	-1.4697	1.2539	-0.24512	-43.279	28.2436	-24.20604	-0.061035	0.019531	0.094727	54.3077	0.0813000000000001	26.63681	0.41357	-0.42969	0.18311	NaN	NaN	NaN	NaN	NaN	NaN
1.63	73.48	-125.5888	1008.7912	-1.375	1.2158	-0.19287	5.837	-27.456	8.887	-0.03125	0.0097656	0.091797	51.3753	63.09	17.1666	0.35986	-0.38818	0.19434	NaN	NaN	NaN	NaN	NaN	NaN
1.632	57.021	-129.3066	1017.2188	-1.3398	1.209	-0.17529	-15.1912	6.6535	14.6935	-0.012207	0.0058594	0.088867	69.076	30.051	13.503	0.32813	-0.3667	0.19727	NaN	NaN	NaN	NaN	NaN	NaN
1.634	48.477	-138.016	1021.9004	-1.2964	1.1938	-0.15381	-26.1295	0.104000000000003	14.1996	0.020508	-0.011719	0.094238	33.028	68.837	42.06	0.26465	-0.31396	0.20752	NaN	NaN	NaN	NaN	NaN	NaN
1.636	60.865	-157.3773	1021.341	-1.2403	1.187	-0.14063	6.6667	-3.9809	15.50628	0.040284	-0.022461	0.091308	38.6693	13.4719	43.975	0.21851	-0.27637	0.21192	NaN	NaN	NaN	NaN	NaN	NaN
1.638	54.722	-180.43	1016.449	-1.1685	1.1685	-0.13428	-20.0826	40.1187	4.387	0.064941	-0.031738	0.087891	16.535	41.523	26.5658	0.18311	-0.24072	0.21191	NaN	NaN	NaN	NaN	NaN	NaN
1.64	23.8357	-200.53	1040.525	-1.064	1.1216	-0.13232	3.211	-5.7048	27.6794	0.095703	-0.05127	0.088867	30.498	9.1646	16.23778	0.15039	-0.1958	0.21484	NaN	NaN	NaN	NaN	NaN	NaN
1.642	21.3517	-216.907	1081.0532	-1.0112	1.0884	-0.12598	15.304	19.8142	22.4677	0.11279	-0.057129	0.090332	11.592	35.6643	38.221	0.13672	-0.17822	0.21582	NaN	NaN	NaN	NaN	NaN	NaN
1.644	3.758	-197.879	1088.353	-0.9248	1.0273	-0.11426	-10.1593	30.486	-2.473	0.14453	-0.084961	0.085449	-1.385	-1.659	38.041	0.12549	-0.14746	0.21436	NaN	NaN	NaN	NaN	NaN	NaN
1.646	-24.46843	-172.662	1101.461	-0.87671	0.9856	-0.10205	29.519	-21.2683	10.2497	0.16992	-0.10034	0.08545	-49.8426	24.2301	35.547	0.12745	-0.13525	0.20728	NaN	NaN	NaN	NaN	NaN	NaN
1.648	-47.987	-163.904	1103.6418	-0.85156	0.94727	-0.09082	4.4537	14.3205	1.872	0.19629	-0.11816	0.085938	-36.5077	6.7717	-0.755000000000001	0.12988	-0.1167	0.20459	NaN	NaN	NaN	NaN	NaN	NaN
1.65	-25.164	-174.608	1106.052	-0.83154	0.91455	-0.070313	1.288	-20.5021	9.00272	0.22754	-0.13525	0.088867	-50.3955	36.8394	4.626	0.12939	-0.094727	0.1958	NaN	NaN	NaN	NaN	NaN	NaN
1.652	-6.12023	-169.212	1130.812	-0.82373	0.89502	-0.064941	66.916	-37.219	11.4656	0.24633	-0.15405	0.092529	-43.61	12.8772	19.3132	0.12061	-0.080566	0.19629	NaN	NaN	NaN	NaN	NaN	NaN
1.654	-3.017	-157.413	1156.1716	-0.80859	0.85352	-0.050293	19.3801	4.3896	-8.173	0.26074	-0.1709	0.092285	-76.2178	18.6946	19.767	0.093262	-0.05127	0.19141	NaN	NaN	NaN	NaN	NaN	NaN
1.656	-6.128	-153.893	1181.183	-0.78272	0.81494	-0.050781	40.9171	-26.589	23.4959	0.27539	-0.1875	0.095703	-52.1419	10.437	9.6225	0.0708	-0.027099	0.18531	NaN	NaN	NaN	NaN	NaN	NaN
1.658	-5.401	-155.582	1194.101	-0.75781	0.76953	-0.067383	45.497	7.43	29.574	0.27783	-0.18945	0.10498	-66.4495	10.0822	21.57849	0.05127	0.0019531	0.18555	NaN	NaN	NaN	NaN	NaN	NaN
1.66	7.855	-137.93509	1202.869	-0.73779	0.70752	-0.092285	9.5823	22.2027	15.6999	0.28369	-0.20068	0.11279	-69.363	-13.8654	21.145	0.031738	0.035645	0.17676	NaN	NaN	NaN	NaN	NaN	NaN
1.662	22.04	-149.773	1231.9113	-0.73193	0.68115	-0.11035	49.736	-13.1415	9.0752	0.2749	-0.20508	0.11841	-79.79	-29.423	47.0633	0.030762	0.055664	0.17236	NaN	NaN	NaN	NaN	NaN	NaN
1.664	16.957	-172.258	1254.25	-0.74219	0.63086	-0.15332	3.9447	19.116	-0.404000000000001	0.2666	-0.21094	0.12451	-69.0946	-15.8403	0.974	0.024414	0.083984	0.16455	NaN	NaN	NaN	NaN	NaN	NaN
1.666	15.3605	-168.05	1284.954	-0.77539	0.6084	-0.19067	12.6403	-10.9985	12.61	0.25928	-0.20898	0.12793	-48.25	-12.9632	-2.9703	0.026368	0.10156	0.15576	NaN	NaN	NaN	NaN	NaN	NaN
1.668	-3.979	-147.6248	1311.916	-0.81836	0.60352	-0.2168	41.7387	-39.644	19.4849	0.25146	-0.20752	0.1333	3.7	22.8548	0.468	0.036621	0.1123	0.14648	NaN	NaN	NaN	NaN	NaN	NaN
1.67	-0.9507	-143.19	1324.6903	-0.91162	0.62256	-0.24463	-13.6681	5.877	-26.641	0.23389	-0.19482	0.13965	-6.701	-18.4104	17.427	0.049316	0.11816	0.125	NaN	NaN	NaN	NaN	NaN	NaN
1.672	8.1418	-158.993	1363.1723	-0.96826	0.64697	-0.25537	14.0877	-23.718	-22.06476	0.21777	-0.18774	0.14331	-11.592	-2.269	-6.9101	0.054688	0.12744	0.11523	NaN	NaN	NaN	NaN	NaN	NaN
1.674	41.2836	-155.665	1372.599	-1.1147	0.71143	-0.27979	9.737	3.172	-1.3462	0.19775	-0.17578	0.146	6.722	-16.766	-25.3632	0.058594	0.13135	0.10107	NaN	NaN	NaN	NaN	NaN	NaN
1.676	45.1482	-158.863	1379.07	-1.2341	0.76928	-0.30053	-22.9082	27.4045	-10.8541	0.17822	-0.15967	0.14795	27.378	23.154	-24.0791	0.056397	0.12744	0.095215	NaN	NaN	NaN	NaN	NaN	NaN
1.678	32.60646	-144.4332	1390.596	-1.3589	0.82666	-0.32617	22.6291	-8.9608	-13.8896	0.16699	-0.14941	0.14893	42.8552	8.9691	21.1547	0.050781	0.12891	0.082031	NaN	NaN	NaN	NaN	NaN	NaN
1.68	6.457	-142.5381	1391.3953	-1.5405	0.92822	-0.35107	-13.923	30.987	-36.072	0.14404	-0.13037	0.15137	55.29598	57.136	16.6545	0.035645	0.13965	0.074707	NaN	NaN	NaN	NaN	NaN	NaN
1.682	12.828	-118.478	1388.7674	-1.6396	0.99414	-0.3584	-32.924	2.624	-7.1222	0.13232	-0.11377	0.15234	25.986	32.848	7.3672	0.028809	0.14844	0.071777	NaN	NaN	NaN	NaN	NaN	NaN
1.684	22.5762	-115.632	1386.461	-1.8594	1.1484	-0.3374	4.5607	-30.647	37.489	0.11816	-0.098145	0.14551	19.463	82.427	-25.0283	0.0029297	0.16553	0.057129	NaN	NaN	NaN	NaN	NaN	NaN
1.686	17.079	-124.933	1382.938	-2.0114	1.2947	-0.34863	-32.99873	31.8931	0.2488	0.097656	-0.077637	0.14307	44.1085	22.5575	-6.605	-0.0058593	0.17896	0.051025	NaN	NaN	NaN	NaN	NaN	NaN
1.688	-0.608999999999998	-114.9187	1378.2419	-2.1401	1.4497	-0.3667	-0.4603	-0.3016	-13.0898	0.087891	-0.065918	0.14355	32.112	53.283	7.407	-0.01709	0.19287	0.045898	NaN	NaN	NaN	NaN	NaN	NaN
1.69	-14.322	-102.7353	1384.94	-2.2534	1.6489	-0.39063	8.1282	15.4266	-12.1701	0.062012	-0.044922	0.13672	41.7776	9.6744	8.663	-0.029785	0.2207	0.044434	NaN	NaN	NaN	NaN	NaN	NaN
1.692	-19.3688	-88.928	1375.241	-2.293	1.7168	-0.39551	-46.297	36.665	-9.7509	0.042969	-0.026855	0.1355	41.975	64.645	-18.386	-0.032715	0.22852	0.041016	NaN	NaN	NaN	NaN	NaN	NaN
1.694	-36.4782	-86.338	1394.0183	-2.3105	1.8027	-0.40039	24.9916	-16.5886	20.7529	0.026855	-0.0083008	0.13428	25.8079	6.3539	11.074	-0.039551	0.23535	0.043945	NaN	NaN	NaN	NaN	NaN	NaN
1.696	-22.075	-91.574	1414.8458	-2.282	1.8118	-0.39599	-3.893	30.977	-12.2918	-0.00097656	0.022461	0.13037	-8.035	46.649	22.085	-0.037109	0.24292	0.038086	NaN	NaN	NaN	NaN	NaN	NaN
1.698	-16.511	-98.3024	1420.7836	-2.2363	1.8008	-0.39453	3.4364	9.1403	-1.1812	-0.0097656	0.043945	0.12988	-6.658	-8.4589	50.326	-0.035156	0.2417	0.038086	NaN	NaN	NaN	NaN	NaN	NaN
1.7	-38.82	-108.1179	1415.88023	-2.1577	1.7583	-0.38721	37.4733	-22.089	16.5017	-0.03418	0.075195	0.12256	-29.442	34.242	73.491	-0.035645	0.24121	0.026855	NaN	NaN	NaN	NaN	NaN	NaN
1.702	-62.1984	-114.873	1420.3786	-2.1162	1.7324	-0.38428	-6.066	26.16	4.82174	-0.051026	0.10034	0.11865	-19.638	-20.3912	114.953	-0.041992	0.23779	0.025391	NaN	NaN	NaN	NaN	NaN	NaN
1.704	-43.6872	-106.448	1424.844	-2.0503	1.6997	-0.36279	36.7912	4.7249	1.537	-0.067871	0.12207	0.11279	-53.8838	49.832	185.77	-0.043457	0.23389	0.011719	NaN	NaN	NaN	NaN	NaN	NaN
1.706	-22.587	-81.738	1429.352	-1.9902	1.666	-0.33594	33.8142	25.644	4.0319	-0.092285	0.14893	0.10645	-45.2578	25.175	260.619	-0.054199	0.23486	-0.0092774	NaN	NaN	NaN	NaN	NaN	NaN
1.708	-30.181	-83.669	1430.407	-1.9604	1.6528	-0.31689	-2.478	48.6867	18.651	-0.10107	0.16357	0.10449	-88.5282	72.974	350.13	-0.069824	0.24658	-0.040527	NaN	NaN	NaN	NaN	NaN	NaN
1.71	-27.352	-95.225	1405.2302	-1.8848	1.6055	-0.30518	38.4792	-6.97475	33.184	-0.11816	0.19092	0.097168	-107.7613	13.44	504.941	-0.10547	0.27539	-0.074219	NaN	NaN	NaN	NaN	NaN	NaN
1.712	-20.993	-96.28	1393.519	-1.8172	1.5589	-0.29371	31.11683	22.6365	10.95852	-0.12598	0.21094	0.091553	-111.6992	76.908	703.196	-0.13818	0.29639	-0.09375	NaN	NaN	NaN	NaN	NaN	NaN
1.714	-18.338	-73.9571	1410.4153	-1.7402	1.5117	-0.28906	27.4699	19.9936	7.0548	-0.13818	0.22803	0.085938	-80.5303	22.402	923.438	-0.22607	0.33496	-0.146	NaN	NaN	NaN	NaN	NaN	NaN
1.716	-31.6201	-45.9514	1413.609	-1.6484	1.4434	-0.28027	43.8368	-16.51064	18.8203	-0.14844	0.24756	0.083008	-106.77	34.591	1123.041	-0.31934	0.36524	-0.18799	NaN	NaN	NaN	NaN	NaN	NaN
1.718	-36.539	-38.007	1408.866	-1.605	1.4126	-0.27979	-9.2405	22.277	1.74461	-0.15576	0.25244	0.081055	-73.212	-67.053	1247.7916	-0.42725	0.4126	-0.2373	NaN	NaN	NaN	NaN	NaN	NaN
1.72	-28.09	-22.307	1406.0655	-1.5366	1.3599	-0.27441	31.35433	-19.79862	8.9315	-0.16943	0.26416	0.076172	-53.961	-82.851	1329.5631	-0.62402	0.5	-0.30078	NaN	NaN	NaN	NaN	NaN	NaN
1.722	-12.587	-14.599	1406.4627	-1.5066	1.3255	-0.26587	20.7302	-4.9713	-5.89	-0.17749	0.26831	0.068604	-51.5263	-122.169	1409.276	-0.74512	0.56543	-0.3374	NaN	NaN	NaN	NaN	NaN	NaN
1.724	-19.729	-13.806	1386.1533	-1.4824	1.3047	-0.26074	-13.60719	24.3109	-4.0866	-0.18555	0.26953	0.062012	-85.683	-88.798	1452.722	-1.0229	0.7251	-0.38623	NaN	NaN	NaN	NaN	NaN	NaN
1.726	-24.832	-20.3366	1386.613	-1.4604	1.2817	-0.25049	33.26921	-23.196	34.589	-0.19629	0.2793	0.044434	-28.0308	-126.1769	1448.455	-1.2629	0.86401	-0.40357	NaN	NaN	NaN	NaN	NaN	NaN
1.728	-7.402	-11.3302	1368.012	-1.4526	1.2661	-0.24512	-4.044	16.8805	13.8653	-0.20166	0.28223	0.033203	27.0103	-143.58	1439.546	-1.5254	1.0117	-0.40137	NaN	NaN	NaN	NaN	NaN	NaN
1.73	-3.215	-2.70555	1348.56901	-1.4312	1.2495	-0.23486	-13.8518	2.0648	23.8143	-0.22412	0.30127	0.01123	129.3723	-202.207	1394.378	-1.8711	1.2324	-0.34766	NaN	NaN	NaN	NaN	NaN	NaN
1.732	-16.233	-12.545	1338.9904	-1.4119	1.2298	-0.2229	20.7033	-51.554	66.3809	-0.24829	0.31983	-0.0036621	151.2774	-269.33	1417.043	-2.0405	1.3501	-0.29736	NaN	NaN	NaN	NaN	NaN	NaN
1.734	-6.155	-26.5212	1322.5128	-1.394	1.2134	-0.22461	-45.4071	-27.4662	70.6412	-0.28613	0.33398	-0.020508	176.0348	-317.05	1365.269	-2.3315	1.5923	-0.18701	NaN	NaN	NaN	NaN	NaN	NaN
1.736	2.604	-19.7034	1306.2185	-1.3633	1.1797	-0.21338	-8.516	-62.433	120.89837	-0.3584	0.36816	-0.040527	158.146	-305.29	1306.366	-2.4812	1.76	-0.12452	NaN	NaN	NaN	NaN	NaN	NaN
1.738	-6.439	-6.378	1285.7067	-1.3516	1.1641	-0.20654	8.782	-18.4833	157.2064	-0.40137	0.375	-0.061523	184.5	-231.773	1222.739	-2.5483	1.9087	-0.088379	NaN	NaN	NaN	NaN	NaN	NaN
1.74	-40.0494	1.4504	1291.805	-1.3203	1.1309	-0.20313	-57.81026	16.685	210.849	-0.52344	0.41602	-0.092285	179.716	-199.148	1219.653	-2.4414	2.041	-0.051758	NaN	NaN	NaN	NaN	NaN	NaN
1.742	-35.5414	3.8126	1284.9948	-1.2979	1.1021	-0.19385	-37.935	-23.8489	321.421	-0.63696	0.45288	-0.11596	193.667	-128.648	1187.198	-2.2134	2.0522	-0.0073242	NaN	NaN	NaN	NaN	NaN	NaN
1.744	-11.331	9.4195	1258.9615	-1.2759	1.0718	-0.18896	-62.074	46.346	428.98	-0.76904	0.49561	-0.13086	174.45	-127.33	1224.64	-1.9077	1.9829	0.03125	NaN	NaN	NaN	NaN	NaN	NaN
1.746	-10.861	8.5658	1233.3494	-1.2461	1.041	-0.18262	-48.517	49.4211	592.416	-0.98193	0.56885	-0.15283	155.324	-89.67	1226.834	-1.4663	1.811	0.077148	NaN	NaN	NaN	NaN	NaN	NaN
1.748	-31.439	16.354	1211.4746	-1.229	1.022	-0.17822	-12.435	-1.34465	752.0827	-1.0996	0.61719	-0.1626	104.082	-134.193	1279.5859	-1.2754	1.7188	0.093262	NaN	NaN	NaN	NaN	NaN	NaN
1.75	-46.314	41.2263	1191.3154	-1.2007	0.98877	-0.17432	-48.961	-2.894	856.785	-1.3418	0.72168	-0.18457	83.73775	-119.871	1287.2153	-1.002	1.5508	0.10742	NaN	NaN	NaN	NaN	NaN	NaN
1.752	-18.6098	72.023	1174.3827	-1.1804	0.96802	-0.16529	-16.719	-77.4217	927.8783	-1.5212	0.80933	-0.19507	74.642	-183.754	1261	-0.90869	1.4419	0.1311	NaN	NaN	NaN	NaN	NaN	NaN
1.754	-41.38685	64.6243	1151.2913	-1.166	0.94629	-0.16113	-21.993	-69.837	1001.3458	-1.689	0.90283	-0.2085	110.067	-206.656	1231.714	-0.86328	1.3359	0.15479	NaN	NaN	NaN	NaN	NaN	NaN
1.756	-35.7236	48.7793	1140.6224	-1.1387	0.91797	-0.15723	-24.7031	-30.094	1042.027	-1.8672	1.0205	-0.21973	125.706	-298.968	1278.945	-0.83447	1.2036	0.15039	NaN	NaN	NaN	NaN	NaN	NaN
1.758	-2.503	42.63	1102.5603	-1.1289	0.90234	-0.14893	17.8251	-75.334	1070.103	-1.9351	1.0825	-0.21973	90.92	-314.433	1337.605	-0.81592	1.144	0.12451	NaN	NaN	NaN	NaN	NaN	NaN
1.76	15.1888	58.81	1092.7839	-1.1108	0.87939	-0.14307	13.3996	-46.058	1050.683	-2.0112	1.188	-0.21729	67.054	-359.081	1402.43881	-0.73828	1.041	0.047363	NaN	NaN	NaN	NaN	NaN	NaN
1.762	-10.0413	59.518	1075.202	-1.0948	0.86084	-0.13745	66.843	-100.334	1060.499	-2.0166	1.2632	-0.21435	31.9347	-330.217	1425.245	-0.64868	0.96997	-0.006592	NaN	NaN	NaN	NaN	NaN	NaN
1.764	-33.2008	67.1584	1079.7519	-1.0776	0.84033	-0.12744	93.766	-156.311	1065.074	-1.9819	1.3052	-0.2041	-2.2324	-383.512	1456.781	-0.56641	0.89648	-0.070313	NaN	NaN	NaN	NaN	NaN	NaN
1.766	3.5366	79.2205	1059.9797	-1.0547	0.8125	-0.12012	83.424	-129.196	1066.859	-1.8633	1.3242	-0.20996	-46.65	-350.228	1516.0807	-0.49219	0.81348	-0.15186	NaN	NaN	NaN	NaN	NaN	NaN
1.768	22.7914	77.3271	1044.511	-1.041	0.80078	-0.11426	106.39	-171.929	1069.451	-1.7788	1.313	-0.2085	-88.6682	-354.843	1555.404	-0.47363	0.79883	-0.18945	NaN	NaN	NaN	NaN	NaN	NaN
1.77	14.137	85.523	1025.8351	-1.0098	0.76123	-0.10352	118.988	-149.119	1020.534	-1.6113	1.2871	-0.1875	-128.7717	-244.701	1567.183	-0.49902	0.80762	-0.22852	NaN	NaN	NaN	NaN	NaN	NaN
1.772	-10.0678	80.7178	1008.38787	-0.98096	0.73096	-0.098633	110.417	-113.6444	972.6127	-1.5066	1.2757	-0.15503	-136.861	-225.327	1529.204	-0.58594	0.86768	-0.23779	NaN	NaN	NaN	NaN	NaN	NaN
1.774	25.4382	90.6306	987.819	-0.95508	0.69727	-0.097656	139.647	-99.406	978.9999	-1.4395	1.2715	-0.11719	-114.188	-166.995	1547.6741	-0.71631	0.94775	-0.22754	NaN	NaN	NaN	NaN	NaN	NaN
1.776	35.585	102.7948	957.611	-0.91748	0.65479	-0.094727	106.533	-13.09	976.932	-1.3979	1.2856	-0.061523	-76.776	-192.703	1574.895	-0.90576	1.0669	-0.21826	NaN	NaN	NaN	NaN	NaN	NaN
1.778	14.1095	102.5247	921.1453	-0.8999	0.63525	-0.092773	78.4	-22.141	1000.9366	-1.3823	1.2993	-0.032715	-27.5094	-140.705	1630.556	-1	1.125	-0.21631	NaN	NaN	NaN	NaN	NaN	NaN
1.78	32.767	82.641	911.2187	-0.86523	0.59375	-0.095703	114.371	-78.945	1020.835	-1.3477	1.3086	0.015625	20.388	-144.60108	1626.008	-1.1826	1.2441	-0.25293	NaN	NaN	NaN	NaN	NaN	NaN
1.782	59.373	84.0123	891.6888	-0.8396	0.56958	-0.089844	28.739	-102.137	1002.304	-1.2846	1.2944	0.038575	-25.235	-103.666	1648.641	-1.3076	1.335	-0.29297	NaN	NaN	NaN	NaN	NaN	NaN
1.784	54.573	96.2326	877.2287	-0.81543	0.54688	-0.087891	53.7288	-180.6895	1024.6086	-1.1973	1.2598	0.045898	-18.382	-137.968	1668.522	-1.4253	1.438	-0.33154	NaN	NaN	NaN	NaN	NaN	NaN
1.786	16.305	117.58	870.3059	-0.78564	0.51709	-0.083496	86.597	-199.587	1028.12	-1.0483	1.1968	0.043945	-31.1364	-117.4393	1704.089	-1.6011	1.6079	-0.36816	NaN	NaN	NaN	NaN	NaN	NaN
1.788	59.741	128.028	837.9324	-0.77246	0.50098	-0.081543	94.871	-208.3397	1059.4774	-0.93823	1.136	0.048339	1.8891	-154.356	1722.828	-1.7085	1.7056	-0.38428	NaN	NaN	NaN	NaN	NaN	NaN
1.79	47.451	134.304	812.181	-0.7417	0.47705	-0.078125	123.419	-247.142	1108.432	-0.84912	1.0718	0.040527	-7.463	-151.911	1755.292	-1.9507	1.9009	-0.39893	NaN	NaN	NaN	NaN	NaN	NaN
1.792	24.20376	115.394	782.4697	-0.71411	0.45874	-0.074463	83.862	-245.5086	1119.0874	-0.771	0.98682	0.011719	5.558	-191.718	1783.2745	-2.154	2.0422	-0.39698	NaN	NaN	NaN	NaN	NaN	NaN
1.794	5.1501	98.845	760.0711	-0.68555	0.44141	-0.077148	78.0131	-276.485	1147.234	-0.74707	0.94531	-0.0048828	1.032	-173.915	1827.197	-2.3555	2.168	-0.39648	NaN	NaN	NaN	NaN	NaN	NaN
1.796	17.1928	101.7366	726.7172	-0.64258	0.4082	-0.07666	90.486	-300.799	1206.398	-0.73584	0.87744	-0.055176	15.376	-148.337	1819.819	-2.5742	2.3262	-0.36719	NaN	NaN	NaN	NaN	NaN	NaN
1.798	33.663	119.6205	715.0213	-0.62305	0.39355	-0.077148	51.118	-274.798	1280.595	-0.75537	0.83447	-0.10571	31.201	-94.8862	1818.206	-2.6558	2.395	-0.34521	NaN	NaN	NaN	NaN	NaN	NaN
1.8	8.9451	117.3502	686.9486	-0.57764	0.36084	-0.079102	33.673	-283.007	1315.296	-0.78271	0.79736	-0.15576	64.9441	-74.7188	1792.305	-2.7417	2.4829	-0.30127	NaN	NaN	NaN	NaN	NaN	NaN
1.802	2.4859	109.3612	669.3785	-0.54468	0.33814	-0.083496	26.511	-225.6803	1341.361	-0.83154	0.78174	-0.20508	88.365	-76.78873	1791.5395	-2.7475	2.5024	-0.26709	NaN	NaN	NaN	NaN	NaN	NaN
1.804	10.7129	111.2165	633.8593	-0.5166	0.31494	-0.07666	-51.3621	-174.491	1322.584	-0.86279	0.77979	-0.22314	80.752	-63.271	1765.1988	-2.6367	2.4629	-0.15088	NaN	NaN	NaN	NaN	NaN	NaN
1.806	26.3254	131.9467	616.72815	-0.47363	0.28711	-0.08252	-20.7647	-183.035	1346.7116	-0.92188	0.79102	-0.26563	42.9288	-32.1544	1739.1434	-2.7422	2.5703	-0.27539	NaN	NaN	NaN	NaN	NaN	NaN
1.808	-1.1782	137.7735	601.7375	-0.45605	0.27197	-0.081543	5.965	-146.229	1360.453	-0.95972	0.81763	-0.28394	52.0992	34.245	1699.155	-2.7437	2.6157	-0.33008	NaN	NaN	NaN	NaN	NaN	NaN
1.81	7.4558	135.5415	582.1298	-0.41846	0.24561	-0.083496	-3.84842	-142.328	1390.8826	-1.0239	0.8501	-0.30322	2.055	58.073	1687.754	-2.6304	2.6216	-0.32764	NaN	NaN	NaN	NaN	NaN	NaN
1.812	21.7266	119.9562	556.9912	-0.39283	0.22437	-0.07959	43.676	-145.508	1431.149	-1.1465	0.92969	-0.33008	-29.877	103.682	1670.758	-2.5076	2.5452	-0.27661	NaN	NaN	NaN	NaN	NaN	NaN
1.814	-4.0266	111.1727	531.9678	-0.36914	0.21436	-0.082031	34.097	-117.858	1434.422	-1.2192	0.9751	-0.35303	-46.046	102.969	1690.944	-2.373	2.4277	-0.24219	NaN	NaN	NaN	NaN	NaN	NaN
1.816	-20.7479	89.44929	507.4102	-0.33838	0.19189	-0.08252	33.6998	-159.015	1447.049	-1.3735	1.0825	-0.38184	-18.382	136.804	1693.806	-2.1836	2.2188	-0.2417	NaN	NaN	NaN	NaN	NaN	NaN
1.818	-13.2737	94.94106	491.3522	-0.31738	0.18457	-0.085938	36.246	-157.987	1482.0167	-1.5337	1.1962	-0.39209	-58.837	97.258	1697.338	-2.0894	2.106	-0.24365	NaN	NaN	NaN	NaN	NaN	NaN
1.82	13.513	112.70689	465.121	-0.28809	0.16895	-0.084961	27.9215	-163.175	1497.391	-1.7168	1.3223	-0.39258	-102.069	120.09	1699.8375	-1.9414	1.8789	-0.23438	NaN	NaN	NaN	NaN	NaN	NaN
1.822	0.9133	127.091	432.9297	-0.2605	0.15723	-0.085205	54.335	-194.32	1531.239	-1.9897	1.5132	-0.37988	-103.684	58.714	1688.111	-1.8611	1.7591	-0.21875	NaN	NaN	NaN	NaN	NaN	NaN
1.824	7.7678	113.369	403.0115	-0.23291	0.14795	-0.086914	27.1584	-160.2859	1536.702	-2.1265	1.604	-0.37451	-103.854	87.027	1637.7707	-1.7969	1.6719	-0.20898	NaN	NaN	NaN	NaN	NaN	NaN
1.826	7.1622	99.1151	382.0276	-0.19775	0.13721	-0.088867	-6.2475	-175.3326	1566.5609	-2.3516	1.7773	-0.36133	-91.7183	41.689	1618.743	-1.7344	1.6016	-0.21436	NaN	NaN	NaN	NaN	NaN	NaN
1.828	30.16729	90.883	354.301474	-0.18115	0.13037	-0.089844	48.593	-185.738	1592.964	-2.4727	1.8975	-0.35351	-78.638	86.65	1601.6222	-1.7129	1.5742	-0.21143	NaN	NaN	NaN	NaN	NaN	NaN
1.83	37.4667	88.7882	350.795	-0.15088	0.12451	-0.09082	53.756	-173.7047	1575.396	-2.5503	1.9985	-0.34521	-62.97267	58.435	1632.448	-1.6836	1.5527	-0.21436	NaN	NaN	NaN	NaN	NaN	NaN
1.832	21.0821	83.119	326.262	-0.12842	0.11402	-0.084961	46.861	-195.305	1582.333	-2.5796	2.0845	-0.32568	-65.837	141.362	1601.654	-1.6785	1.553	-0.22266	NaN	NaN	NaN	NaN	NaN	NaN
1.834	39.115	82.5939	304.7233	-0.1084	0.10693	-0.085938	71.628	-156.584	1562.7746	-2.5718	2.1138	-0.31494	-74.489	104.609	1589.831	-1.6675	1.5474	-0.22217	NaN	NaN	NaN	NaN	NaN	NaN
1.836	30.5066	88.0071	286.63685	-0.085938	0.097656	-0.083008	27.8038	-118.938	1533.096	-2.5171	2.1392	-0.28027	-65.5498	141.992	1546.1244	-1.6343	1.522	-0.2124	NaN	NaN	NaN	NaN	NaN	NaN
1.838	30.34006	78.114	268.7484	-0.073242	0.088867	-0.083984	48.623	-104.435	1536.3073	-2.407	2.1204	-0.24658	-24.679	84.303	1531.304	-1.6069	1.5024	-0.20361	NaN	NaN	NaN	NaN	NaN	NaN
1.84	13.572	78.6908	258.6615	-0.047852	0.08252	-0.082031	40.493	-42.0417	1548.8164	-2.4058	2.0825	-0.26514	-19.69	169.953	1478.161	-1.5347	1.4468	-0.19434	NaN	NaN	NaN	NaN	NaN	NaN
1.842	39.1813	92.404	224.6527	-0.02002	0.07373	-0.07959	25.9434	-31.96764	1532.4863	-2.3672	2.0762	-0.30957	1.542	156.022	1444.709	-1.4751	1.3989	-0.18652	NaN	NaN	NaN	NaN	NaN	NaN
1.844	25.4842	83.957	201.0713	-0.0097656	0.067383	-0.072754	34.9138	-39.5517	1549.5406	-2.3047	2.0352	-0.28906	15.902	245.784	1380.1642	-1.4155	1.3501	-0.18115	NaN	NaN	NaN	NaN	NaN	NaN
1.846	3.282	66.103	182.67438	0.0078125	0.059082	-0.072266	-11.965	-9.337	1520.155	-2.1792	1.9165	-0.21826	27.509	173.8805	1340.093	-1.3442	1.2778	-0.16895	NaN	NaN	NaN	NaN	NaN	NaN
1.848	5.537	48.5169	171.9202	0.023682	0.048584	-0.067139	-20.8956	-5.972	1538.04	-2.0908	1.8438	-0.19971	39.826	226.2149	1291.649	-1.3081	1.2485	-0.17139	NaN	NaN	NaN	NaN	NaN	NaN
1.85	20.2091	46.552	160.9574	0.041016	0.040039	-0.064941	-15.35	12.099	1560.214	-2.0078	1.7676	-0.19434	108.952	176.164	1254.0225	-1.2402	1.1875	-0.16748	NaN	NaN	NaN	NaN	NaN	NaN
1.852	30.382	54.033	145.9501	0.057617	0.025879	-0.066895	-37.9693	17.535	1560.6661	-1.8926	1.666	-0.18311	132.912	248.2031	1213.297	-1.1894	1.1504	-0.16846	NaN	NaN	NaN	NaN	NaN	NaN
1.854	4.649	52.647	139.60215	0.066406	0.015625	-0.067383	-23.859	-37.3538	1568.4329	-1.8413	1.6138	-0.17969	142.922	194.944	1193.9275	-1.1343	1.1138	-0.17041	NaN	NaN	NaN	NaN	NaN	NaN
1.856	1.837	60.8344	135.08598	0.077637	0.0092773	-0.05957	-30.3298	-35.2931	1585.5123	-1.7734	1.5215	-0.16455	108.481	240.3329	1159.977	-1.0566	1.0674	-0.16797	NaN	NaN	NaN	NaN	NaN	NaN
1.858	10.453	63.0254	111.6296	0.085449	-0.0024414	-0.060791	-53.732	-49.174	1573.3118	-1.7378	1.4604	-0.15747	105.64	171.318	1131.972	-1.0195	1.0391	-0.16406	NaN	NaN	NaN	NaN	NaN	NaN
1.86	4.607	65.928	110.1555	0.088379	-0.0058594	-0.057617	-24.4329	-46.1596	1590.86	-1.7065	1.4028	-0.15381	81.344	230.7369	1061.4885	-0.93555	0.9668	-0.15967	NaN	NaN	NaN	NaN	NaN	NaN
1.862	2.354	54.345	108.6684	0.080078	-0.017578	-0.048828	-24.4847	3.876	1593.248	-1.6772	1.3423	-0.14502	99.892	190.029	1022.5662	-0.86597	0.9104	-0.15381	NaN	NaN	NaN	NaN	NaN	NaN
1.864	-2.5235	41.6249	97.18047	0.081055	-0.020508	-0.04248	-45.4781	-10.251	1565.084	-1.6621	1.3145	-0.15332	55.546	266.397	994.508	-0.80127	0.8501	-0.15625	NaN	NaN	NaN	NaN	NaN	NaN
1.866	6.309	37.61838	84.4062	0.072754	-0.024414	-0.035156	0.873000000000001	3.718	1555.5642	-1.6348	1.2598	-0.14795	45.252	240.1492	949.9728	-0.72754	0.77344	-0.15332	NaN	NaN	NaN	NaN	NaN	NaN
1.868	-39.0157	30.7641	81.4847	0.063721	-0.024414	-0.033203	-40.4594	22.138	1511.0492	-1.6189	1.2254	-0.14746	26.1474	316.838	883.735	-0.69434	0.729	-0.15283	NaN	NaN	NaN	NaN	NaN	NaN
1.87	-12.4481	26.5296	87.1326	0.050293	-0.022949	-0.027832	-25.458	21.3516	1510.91	-1.6016	1.1875	-0.14258	57.3536	253.108	827.313	-0.63574	0.65088	-0.14258	NaN	NaN	NaN	NaN	NaN	NaN
1.872	-1.972	33.5219	78.67564	0.03418	-0.018555	-0.019531	-10.675	85.046	1513.435	-1.5752	1.1465	-0.1416	28.207	269.38	797.9062	-0.58594	0.5835	-0.14893	NaN	NaN	NaN	NaN	NaN	NaN
1.874	5.007	41.3908	62.192835	0.025391	-0.018555	-0.015137	-38.91216	115.002	1477.254	-1.562	1.1333	-0.146	55.831	215.144	784.782	-0.55615	0.55518	-0.15039	NaN	NaN	NaN	NaN	NaN	NaN
1.876	9.174	36.1595	53.6399	0.0058594	-0.02002	-0.0078125	-10.079	114.839	1478.354	-1.5352	1.1016	-0.146	42.743	291.8834	728.9731	-0.50342	0.50391	-0.14453	NaN	NaN	NaN	NaN	NaN	NaN
1.878	12.1454	32.4057	35.7266	0.0012207	-0.016846	-0.00024415	-39.3084	128.913	1442.5843	-1.5088	1.082	-0.15161	40.607	294.7043	655.282	-0.46777	0.46875	-0.14551	NaN	NaN	NaN	NaN	NaN	NaN
1.88	26.4305	34.3967	58.9668	-0.0073242	-0.01709	0.0029297	0.0700000000000003	90.6664	1391.5906	-1.48	1.061	-0.15137	10.2916	346.723	595.695	-0.43115	0.43408	-0.14746	NaN	NaN	NaN	NaN	NaN	NaN
1.882	6.578	42.6089	52.5374	-0.016113	-0.014648	0.0083008	20.876	87.5185	1396.8966	-1.4351	1.0317	-0.15479	-16.0715	276.865	580.861	-0.36914	0.38672	-0.15137	NaN	NaN	NaN	NaN	NaN	NaN
1.884	36.5922	23.9071	51.0464	-0.022461	-0.020508	0.014648	-4.153	119.4179	1366.6878	-1.4102	1.0137	-0.1543	-58.181	282.509	557.9105	-0.33252	0.35938	-0.15137	NaN	NaN	NaN	NaN	NaN	NaN
1.886	19.721	14.90902	48.87101	-0.030762	-0.015625	0.020996	25.51636	84.436	1357.8741	-1.3628	0.9751	-0.1582	-35.102	234.038	503.2594	-0.26807	0.30566	-0.15869	NaN	NaN	NaN	NaN	NaN	NaN
1.888	5.066	33.3221	32.3282	-0.030274	-0.01709	0.023682	41.4548	94.57182	1349.51	-1.323	0.94946	-0.15601	-43.531	258.422	458.312	-0.21435	0.26245	-0.15967	NaN	NaN	NaN	NaN	NaN	NaN
1.89	14.9317	44.6465	31.828199	-0.028809	-0.019531	0.024414	31.9259	75.427	1322.9464	-1.2891	0.92578	-0.15527	-22.0546	214.396	438.2814	-0.16211	0.22119	-0.16455	NaN	NaN	NaN	NaN	NaN	NaN
1.892	10.5016	38.1882	32.8098	-0.026855	-0.026855	0.027344	44.3396	51.816	1338.585	-1.2461	0.88281	-0.14941	-28.45	209.386	411.192	-0.10156	0.1543	-0.17236	NaN	NaN	NaN	NaN	NaN	NaN
1.894	6.902	33.154	23.2956	-0.026855	-0.03418	0.026367	30.0775511	102.5525	1316.89	-1.2246	0.86719	-0.15039	-1.0887	180.2177	359.099	-0.072754	0.12158	-0.17529	NaN	NaN	NaN	NaN	NaN	NaN
1.896	4.26	32.4077	6.4175	-0.016602	-0.03418	0.019531	15.4666	95.532	1280.89	-1.1855	0.83398	-0.15039	24.8278	170.869	299.5629	-0.012207	0.061523	-0.18066	NaN	NaN	NaN	NaN	NaN	NaN
1.898	25.4708	19.4411	13.62992	-0.0063477	-0.042724	0.020264	19.802	115.4921	1257.788	-1.1599	0.81372	-0.15087	50.365	142.789	270.0982	0.01831	0.016846	-0.18848	NaN	NaN	NaN	NaN	NaN	NaN
1.9	12.879	7.3709	34.447246	-0.00048828	-0.048828	0.012695	4.71671	147.2832	1192.8	-1.1348	0.79102	-0.14453	69.367	135.336	254.1129	0.046387	-0.024902	-0.18994	NaN	NaN	NaN	NaN	NaN	NaN
1.902	11.937	9.9669	30.7719	0.012695	-0.056152	0.0053711	47.453	120.507	1163.7029	-1.0996	0.7666	-0.1377	62.761	124.4152	207.5038	0.064453	-0.073242	-0.19287	NaN	NaN	NaN	NaN	NaN	NaN
1.904	5.496	17.1567	17.8842	0.019531	-0.059082	0.00048828	57.588	157.4029	1143.6527	-1.084	0.75391	-0.13135	66.1272	130.6533	155.6087	0.06543	-0.094238	-0.19629	NaN	NaN	NaN	NaN	NaN	NaN
1.906	12.668	14.176	23.856	0.03418	-0.063477	0.0043945	6.1293	168.739	1105.654	-1.043	0.72852	-0.12402	45.209	100.87	125.7785	0.058594	-0.12549	-0.19922	NaN	NaN	NaN	NaN	NaN	NaN
1.908	-9.858	13.1256	22.6026	0.041992	-0.074219	-0.010254	38.709	158.98	1108.0161	-1.0137	0.71094	-0.11841	29.651	71.1265	114.028	0.042969	-0.1438	-0.19507	NaN	NaN	NaN	NaN	NaN	NaN
1.91	-19.2512	12.824	17.015742	0.049805	-0.075195	-0.02002	21.757	211.484	1066.925	-0.97998	0.69189	-0.11475	22.6929	63.438	98.28	0.022949	-0.15332	-0.19727	NaN	NaN	NaN	NaN	NaN	NaN
1.912	-7.657	13.8412	1.33941	0.055664	-0.083008	-0.023438	20.6528	184.1534	1027.7982	-0.93896	0.66553	-0.10303	66.261	74.3175	77.099	-0.016602	-0.1626	-0.20166	NaN	NaN	NaN	NaN	NaN	NaN
1.914	-13.625	17.5503	15.2345	0.0625	-0.087402	-0.030273	47.824	189.227	1015.1849	-0.91748	0.6499	-0.10156	82.632	94.349	22.388	-0.034668	-0.15967	-0.20068	NaN	NaN	NaN	NaN	NaN	NaN
1.916	-15.8194	15.3689	25.9213	0.064941	-0.087891	-0.039551	17.5773	197.31	975.555	-0.87109	0.61426	-0.092773	35.1393	66.4276	41.604	-0.07373	-0.14502	-0.20361	NaN	NaN	NaN	NaN	NaN	NaN
1.918	-28.49009	2.97035	3.7557	0.063965	-0.087891	-0.049072	9.73748	151.6141	938.2041	-0.82934	0.5935	-0.091796	36.932	37.9168	13.725	-0.10059	-0.13232	-0.20166	NaN	NaN	NaN	NaN	NaN	NaN
1.92	1.53	7.03771	11.2593	0.065918	-0.088867	-0.057129	17.8233	187.781	935.9949	-0.7959	0.5625	-0.088379	39.217	3.689	6.5926	-0.12402	-0.11572	-0.20605	NaN	NaN	NaN	NaN	NaN	NaN
1.922	-0.0210000000000008	4.15656	21.8708	0.0625	-0.085938	-0.072754	7.359	192.3026	895.8665	-0.73584	0.52588	-0.083496	37.1362	15.836	-34.185	-0.16406	-0.088379	-0.21045	NaN	NaN	NaN	NaN	NaN	NaN
1.924	-6.525	6.9247	32.917	0.05957	-0.083008	-0.077637	39.6383	153.1674	908.789	-0.68847	0.49511	-0.078857	22.1571	-4.63	-9.2479	-0.17773	-0.080078	-0.21484	NaN	NaN	NaN	NaN	NaN	NaN
1.926	3.516	12.5955	14.4131	0.066895	-0.083984	-0.089355	44.188	205.3095	864.209	-0.64648	0.46436	-0.076172	-0.404	14.9496	2.9882	-0.20508	-0.058594	-0.22266	NaN	NaN	NaN	NaN	NaN	NaN
1.928	4.704	24.9319	0.49174	0.06665	-0.076661	-0.10059	47.035	162.669	801.43	-0.5874	0.42236	-0.075684	-39.6366	5.14	31.0882	-0.22168	-0.041748	-0.22436	NaN	NaN	NaN	NaN	NaN	NaN
1.93	8.403	10.8652	11.6432	0.067383	-0.073242	-0.10938	68.136	176.0534	784.774	-0.55518	0.40088	-0.078125	-65.2133	49.434	-9.714	-0.23926	-0.03125	-0.23535	NaN	NaN	NaN	NaN	NaN	NaN
1.932	-14.5958	0.9454	13.1981	0.071289	-0.05957	-0.12305	43.0725	202.6537	719.778	-0.50049	0.36475	-0.072266	-57.48556	23.236	-9.941846	-0.25928	-0.016113	-0.23389	NaN	NaN	NaN	NaN	NaN	NaN
1.934	8.436	3.055	19.0387	0.073242	-0.055664	-0.12891	69.111	153.419	702.285	-0.45386	0.33374	-0.070801	-68.1419	30.22765	-14.25108	-0.27197	-0.0078125	-0.2334	NaN	NaN	NaN	NaN	NaN	NaN
1.936	14.393	20.1637	17.3299	0.073242	-0.049805	-0.13379	88.321	200.1791	665.2141	-0.40576	0.30225	-0.065918	-65.2343	-4.049	27.1549	-0.29834	-0.0019531	-0.23096	NaN	NaN	NaN	NaN	NaN	NaN
1.938	4.559	3.5601	23.6615	0.071045	-0.046631	-0.14111	68.661	194.3964	604.479	-0.35254	0.27539	-0.070313	-58.794	49.759	13.299	-0.33081	0.0080566	-0.23194	NaN	NaN	NaN	NaN	NaN	NaN
1.94	9.255	-3.3728	22.2999	0.069824	-0.038574	-0.14844	80.98	170.785	585.3565	-0.3208	0.25439	-0.066895	-42.0445	31.4562	9.856	-0.37012	0.020508	-0.22754	NaN	NaN	NaN	NaN	NaN	NaN
1.942	16.808	-2.615	14.5644	0.062012	-0.02832	-0.15576	60.903	238.693	538.8939	-0.271	0.22217	-0.064941	-59.0062	67.564	-9.138	-0.41895	0.044434	-0.22266	NaN	NaN	NaN	NaN	NaN	NaN
1.944	32.2466	4.52733	19.4807	0.065918	-0.020996	-0.1582	49.75	214.598	514.305	-0.23779	0.19311	-0.064454	-43.649	16.8271	35.3239	-0.44873	0.060059	-0.22363	NaN	NaN	NaN	NaN	NaN	NaN
1.946	22.5399	9.1699	7.0281	0.064453	-0.0073242	-0.16406	57.736	230.244	484.345	-0.19922	0.16602	-0.067383	-56.434	54.6095	15.2559	-0.48926	0.09082	-0.21631	NaN	NaN	NaN	NaN	NaN	NaN
1.948	10.283	7.7497	3.80636	0.061279	-0.0056152	-0.16894	34.2787	222.368	430.4884	-0.16113	0.13623	-0.070801	-36.9025	38.8129	21.24757	-0.51367	0.12109	-0.20727	NaN	NaN	NaN	NaN	NaN	NaN
1.95	14.1454	7.0427	-5.8569	0.05957	0.0024414	-0.17236	79.179	136.352	411.1901	-0.14014	0.11914	-0.066406	-30.701	84.014	-2.508	-0.52441	0.15723	-0.2002	NaN	NaN	NaN	NaN	NaN	NaN
1.952	13.681	6.5189	17.1546	0.050781	0.0029297	-0.18018	51.917	163.6103	360.17	-0.10156	0.089844	-0.069824	-26.9003	23.3465	33.8506	-0.52246	0.19434	-0.18115	NaN	NaN	NaN	NaN	NaN	NaN
1.954	15.6733	-5.5935	56.622	0.04541	0.0073242	-0.18555	41.831	156.427	321.597	-0.079346	0.073486	-0.07251	-28.338	39.8	29.5459	-0.51318	0.2124	-0.17725	NaN	NaN	NaN	NaN	NaN	NaN
1.956	10.244	-21.9271	68.8609	0.030762	0.010742	-0.21143	53.32	115.62	326.0309	-0.061035	0.054688	-0.075195	5.0237	-10.3293	30.868	-0.47998	0.24121	-0.15674	NaN	NaN	NaN	NaN	NaN	NaN
1.958	-3.577	-16.2884	111.596	0.01709	0.022217	-0.21387	40.52	163.3667	285.42224	-0.036133	0.035645	-0.080078	10.83	29.356	9.7957	-0.4436	0.24902	-0.14282	NaN	NaN	NaN	NaN	NaN	NaN
1.96	-0.995000000000001	29.1801	148.874	-0.011719	0.031738	-0.2207	23.2659	114.338	255.237	-0.027832	0.02832	-0.083496	19.3241	-10.937	53.871	-0.39697	0.25635	-0.12891	NaN	NaN	NaN	NaN	NaN	NaN
1.962	21.4783	38.0924	214.2795	-0.069824	0.055176	-0.24072	31.8359	111.7472	256.085	-0.01416	0.0078125	-0.088379	47.039	15.8967	67.93	-0.32666	0.24268	-0.1167	NaN	NaN	NaN	NaN	NaN	NaN
1.964	32.8952	22.8219	260.234	-0.10596	0.068848	-0.24561	18.7181	137.74	216.65967	-0.0090329	-0.0012207	-0.099121	38.383	-4.819	48.68	-0.28369	0.23486	-0.10889	NaN	NaN	NaN	NaN	NaN	NaN
1.966	55.6678	8.901	350.151	-0.20605	0.10693	-0.27246	20.9801	79.1137	216.1	-0.0019531	-0.015137	-0.10205	42.494	24.8696	0.835800000000001	-0.19824	0.1958	-0.097656	NaN	NaN	NaN	NaN	NaN	NaN
1.968	82.6872	15.7623	466.801	-0.30102	0.13696	-0.28637	14.0112	110.197	193.174	0.0029297	-0.025879	-0.10986	62.098	-5.11293	10.2654	-0.13331	0.1626	-0.090088	NaN	NaN	NaN	NaN	NaN	NaN
1.97	78.494	13.47169	606.3193	-0.41699	0.1748	-0.30273	-20.3541	81.318	149.362486	0.0048828	-0.030273	-0.11621	43.354	-11.805	17.4447	-0.070801	0.12549	-0.075684	NaN	NaN	NaN	NaN	NaN	NaN
1.972	34.7015	18.5448	698.63244	-0.61523	0.25	-0.32617	15.7594	29.281	137.8636	0.011719	-0.033691	-0.12305	31.1218	-45.402	28.6647	-0.0048828	0.074219	-0.065918	NaN	NaN	NaN	NaN	NaN	NaN
1.974	32.3368	-0.214399999999999	762.5216	-0.73193	0.30127	-0.33936	14.8979	93.5467	115.915	0.020752	-0.039551	-0.12671	25.608	-9.152	-9.329	0.029785	0.053711	-0.06543	NaN	NaN	NaN	NaN	NaN	NaN
1.976	8.93	-52.1863	829.5965	-0.9917	0.43115	-0.3623	15.2961	52.376	89.42268	0.025391	-0.040039	-0.12891	7.1816	-5.8769	-7.6077	0.090332	0.0063477	-0.054199	NaN	NaN	NaN	NaN	NaN	NaN
1.978	-38.166	-72.3711	886.3913	-1.2891	0.57813	-0.36719	35.522	76.3691	78.6223	0.03125	-0.03418	-0.12744	-1.608	24.1872	-1.6509	0.1289	-0.025635	-0.053223	NaN	NaN	NaN	NaN	NaN	NaN
1.98	-42.795	-50.2437	956.0437	-1.4414	0.66309	-0.3584	3.2102	107.789	59.2625	0.029297	-0.033691	-0.13281	-35.1278	9.076	37.6042	0.17139	-0.058594	-0.041992	NaN	NaN	NaN	NaN	NaN	NaN
1.982	-61.559	-6.3815	1006.475	-1.7524	0.83252	-0.33887	9.47806	26.8088	51.1744	0.028809	-0.027344	-0.13867	-28.874	30.1357	4.626	0.22266	-0.10059	-0.036621	NaN	NaN	NaN	NaN	NaN	NaN
1.984	-76.519	-8.3545	1054.229	-1.9783	0.96361	-0.31641	29.621	54.5885	53.00482	0.022217	-0.022217	-0.13623	-33.475	12.87001	-24.168	0.24658	-0.12158	-0.03418	NaN	NaN	NaN	NaN	NaN	NaN
1.986	-86.64	-52.592	1059.013	-2.1831	1.1177	-0.28857	38.145	31.4537	40.0674	0.020508	-0.02002	-0.13672	-37.093	31.249	-25.7511	0.27783	-0.16406	-0.02832	NaN	NaN	NaN	NaN	NaN	NaN
1.988	-68.8405	-82.479	1038.926	-2.4194	1.3599	-0.24951	23.8801	-16.51303	46.906	0.01416	-0.01416	-0.13184	-43.7435	7.043	5.766	0.29151	-0.19043	-0.023682	NaN	NaN	NaN	NaN	NaN	NaN
1.99	-52.743	-109.818	1067.42	-2.521	1.5063	-0.23242	22.4163	39.4144	29.3897	0.011719	-0.021484	-0.13135	-50.7188	3.465	-13.5692	0.29688	-0.21338	-0.015625	NaN	NaN	NaN	NaN	NaN	NaN
1.992	-47.731	-72.05	1080.089	-2.6577	1.7798	-0.22705	29.0585	-4.9476	2.2386	0.0068359	-0.013184	-0.12549	-64.5592	6.835	-12.10794	0.28955	-0.24121	-0.016113	NaN	NaN	NaN	NaN	NaN	NaN
1.994	-33.115	-30.966	1068.344	-2.6597	1.9028	-0.25781	21.552	7.9484	1.7813	-0.00073241	-0.012451	-0.12304	-49.199	8.134	-17.4279	0.28076	-0.24658	-0.016113	NaN	NaN	NaN	NaN	NaN	NaN
1.996	-72.3059	-1.395	1018.3431	-2.5718	1.936	-0.29834	28.0606	43.699	-18.3645	-0.003418	-0.0078125	-0.11426	-46.373	15.2151	-7.5762	0.25781	-0.2627	-0.0048828	NaN	NaN	NaN	NaN	NaN	NaN
1.998	-79.396	-15.418	990.808	-2.3242	1.8574	-0.36035	44.3417	-38.3245	-0.334000000000001	-0.0087891	0.00048828	-0.10693	-44.937	32.75849	33.43	0.24341	-0.26319	-0.0070801	NaN	NaN	NaN	NaN	NaN	NaN
2	-86.639	-51.541	1001.989	-2.1719	1.7891	-0.39355	38.5163	3.5268	3.6476	-0.011719	0.0048828	-0.10059	-68.164	55.953	19.4698	0.22656	-0.2627	-0.0068359	NaN	NaN	NaN	NaN	NaN	NaN
2.002	-103.2601	-68.4483	1017.205	-1.8579	1.6196	-0.44873	30.877	-4.8613	-12.833	-0.0097656	0.015625	-0.087402	-56.2182	59.787	9.862	0.19922	-0.2583	-0.0063477	NaN	NaN	NaN	NaN	NaN	NaN
2.004	-102.6142	-68.9312	1019.133	-1.6414	1.4739	-0.45337	11.1445	-39.395	13.5791	-0.0046387	0.030273	-0.073731	-38.9243	51.81	2.521	0.18335	-0.24633	0.0031738	NaN	NaN	NaN	NaN	NaN	NaN
2.006	-113.557	-68.4431	1019.76	-1.4536	1.3306	-0.42822	1.511	36.4553	-13.7127	0.00097656	0.040039	-0.066895	-16.909	9.818	18.055	0.16748	-0.2373	0.0053711	NaN	NaN	NaN	NaN	NaN	NaN
2.008	-94.97	-89.225	993.9987	-1.2842	1.1621	-0.42383	14.7287	-5.28995	-9.0845	0.017578	0.053223	-0.048828	-25.018	31.4197	2.359	0.14648	-0.2207	0.0048828	NaN	NaN	NaN	NaN	NaN	NaN
2.01	-99.937	-119.0423	973.311	-1.2188	1.0996	-0.4375	30.411	22.0046	-14.73656	0.021484	0.057617	-0.044922	20.665	32.8503	22.0833	0.13672	-0.21045	0.0087891	NaN	NaN	NaN	NaN	NaN	NaN
2.012	-37.4981	-149.3546	976.518	-1.0703	0.98145	-0.47656	-3.269	61.536	-36.106	0.039063	0.058594	-0.031738	22.391	64.535	1.7073	0.12549	-0.2002	0.0083008	NaN	NaN	NaN	NaN	NaN	NaN
2.014	-15.484	-173.359	1033.3919397	-0.94825	0.88916	-0.49707	-2.703	-4.2913	0.3285	0.052979	0.05249	-0.025879	30.9466	40.274	47.017	0.1228	-0.19409	0.0051269	NaN	NaN	NaN	NaN	NaN	NaN
2.016	8.7617	-173.332	1063.7378	-0.82275	0.7876	-0.50537	-13.7416	39.089	11.3862	0.06543	0.04248	-0.013184	25.765	50.597	35.9102	0.12061	-0.19189	0	NaN	NaN	NaN	NaN	NaN	NaN
2.018	6.5425	-184.255	1091.4067	-0.67676	0.64551	-0.50244	-14.56936	17.2121	8.4518	0.081543	0.024414	-0.0087891	36.8186	19.5849	36.024	0.11377	-0.19336	-0.003418	NaN	NaN	NaN	NaN	NaN	NaN
2.02	7.47	-188.241	1089.8711	-0.62061	0.58789	-0.50146	-0.335000000000001	-36.401	11.8307	0.090332	0.016113	-0.0048828	38.103	34.907	12.3989	0.11719	-0.19336	-0.0039063	NaN	NaN	NaN	NaN	NaN	NaN
2.022	36.393092	-191.635	1104.0987	-0.54346	0.48975	-0.48486	-19.1698	26.6484	-7.8193	0.10547	-0.0068359	-0.0078125	51.087	-8.74525	38.0926	0.12109	-0.19189	-0.017578	NaN	NaN	NaN	NaN	NaN	NaN
2.024	44.1028	-180.3889	1107.345	-0.51392	0.4419	-0.46924	-17.7495	-2.6657	-16.1984	0.12036	-0.02246	-0.001709	18.02	-5.685	39.1188	0.12109	-0.18799	-0.02002	NaN	NaN	NaN	NaN	NaN	NaN
2.026	46.7825	-158.5674	1099.256	-0.49805	0.41016	-0.44824	3.222	8.3777	6.19365	0.1333	-0.036621	-0.0029297	12.83	-24.59882	46.561	0.12109	-0.18359	-0.030273	NaN	NaN	NaN	NaN	NaN	NaN
2.028	17.4319	-144.138	1115.5235	-0.49658	0.39111	-0.42725	-15.2786	58.915	8.4042	0.15186	-0.055664	0	7.433	5.1854	-0.4262	0.11621	-0.16895	-0.029297	NaN	NaN	NaN	NaN	NaN	NaN
2.03	30.821	-129.102	1155.14356	-0.49756	0.38184	-0.42383	-11.71888	-14.3204	7.395	0.15771	-0.0625	-0.0024414	25.0354	-9.4857	16.3509	0.11865	-0.16113	-0.038574	NaN	NaN	NaN	NaN	NaN	NaN
2.032	55.106	-134.979	1183.861	-0.49951	0.37939	-0.41943	3.021	22.2762	20.1235	0.17236	-0.07666	-0.0078125	7.498	9.05	18.0373	0.11523	-0.1377	-0.045898	NaN	NaN	NaN	NaN	NaN	NaN
2.034	79.111	-129.609	1210.4143	-0.51342	0.36694	-0.42554	4.056	17.2323	5.0813	0.17554	-0.090576	-0.012939	-19.4777	-12.285	55.401	0.1145	-0.12378	-0.048584	NaN	NaN	NaN	NaN	NaN	NaN
2.036	96.713	-133.175	1236.19807	-0.53271	0.3667	-0.43311	3.224	-32.334	29.398	0.18213	-0.096191	-0.023438	-22.363	26.134961	16.0766	0.11035	-0.11035	-0.052734	NaN	NaN	NaN	NaN	NaN	NaN
2.038	86.145	-120.815	1247.749	-0.5752	0.37109	-0.43164	23.1758	40.513	18.6646	0.18164	-0.1123	-0.024902	-10.8098	-7.7406	-6.2967	0.10449	-0.094238	-0.055176	NaN	NaN	NaN	NaN	NaN	NaN
2.04	80.818	-100.022	1268.221	-0.61719	0.37988	-0.42871	10.7524	0.4622	17.11499	0.17969	-0.11768	-0.026367	-34.545	9.206	-5.9102	0.10205	-0.086914	-0.051758	NaN	NaN	NaN	NaN	NaN	NaN
2.042	55.557	-105.322	1277.268	-0.72656	0.4209	-0.42188	3.297	6.1351	9.0683	0.17822	-0.13037	-0.032715	-50.4564	-25.8265	18.1596	0.088867	-0.078125	-0.060059	NaN	NaN	NaN	NaN	NaN	NaN
2.044	62.187	-134.688	1331.311	-0.84326	0.47656	-0.41504	24.0429	48.177	-4.911	0.17261	-0.13672	-0.034179	-50.983	12.151	-19.482	0.069092	-0.070556	-0.052247	NaN	NaN	NaN	NaN	NaN	NaN
2.046	58.089	-175.937	1367.374	-0.97656	0.5415	-0.41113	36.3329	-25.287	-3.1574	0.16846	-0.13818	-0.040039	-47.1309	3.724	-9.0837	0.055664	-0.0625	-0.060547	NaN	NaN	NaN	NaN	NaN	NaN
2.048	32.063	-176.677	1360.379	-1.1616	0.65283	-0.42529	22.6025	23.6413	0.5532	0.16357	-0.13525	-0.039551	-60.8961	41.1194	-29.79	0.024414	-0.042969	-0.056641	NaN	NaN	NaN	NaN	NaN	NaN
2.05	10.9782	-166.106	1353.4593	-1.2544	0.72314	-0.44238	30.843359	14.2232	5.7104	0.1626	-0.13232	-0.045898	-59.298	10.1539	10.1553	0.0092773	-0.039551	-0.059082	NaN	NaN	NaN	NaN	NaN	NaN
2.052	6.183	-153.502	1353.2257	-1.4409	0.89307	-0.4834	39.6969	-41.469	27.518	0.15576	-0.12646	-0.046387	-68.4902	36.2291	-2.159	-0.020996	-0.018066	-0.0625	NaN	NaN	NaN	NaN	NaN	NaN
2.054	11.9931	-125.8644	1366.368	-1.585	1.0274	-0.50341	31.954987	14.48953	21.5822	0.14893	-0.11694	-0.047607	-63.8109	11.3866	-13.242	-0.041504	-0.0078124	-0.067383	NaN	NaN	NaN	NaN	NaN	NaN
2.056	-2.0583	-118.5114	1380.928	-1.73	1.1646	-0.51465	28.9903	-30.9384	11.4861	0.14697	-0.10547	-0.046387	-23.619	31.925	-8.279	-0.053223	0.0073242	-0.070801	NaN	NaN	NaN	NaN	NaN	NaN
2.058	43.784	-122.6362	1396.7677	-1.9316	1.3398	-0.51465	12.558	-19.9499	24.1296	0.14063	-0.094727	-0.049316	-8.454	-35.255	67.812	-0.075195	0.024902	-0.080566	NaN	NaN	NaN	NaN	NaN	NaN
2.06	36.842	-127.962	1400.043	-2.0273	1.418	-0.50781	13.0255	33.481	-0.288200000000001	0.13574	-0.084961	-0.04834	-44.283	-14.0028	119.646	-0.083496	0.033691	-0.083496	NaN	NaN	NaN	NaN	NaN	NaN
2.062	29.576	-108.332	1399.7358	-2.187	1.5513	-0.50537	21.1555	-26.094	7.6153	0.12695	-0.066895	-0.052734	-10.384	27.029	194.703	-0.09082	0.04834	-0.099609	NaN	NaN	NaN	NaN	NaN	NaN
2.064	23.9845	-87.318	1390.2495	-2.2661	1.6177	-0.5166	-2.568	13.3515	1.4291	0.11475	-0.053711	-0.049805	25.402	103.7314	250.087	-0.10425	0.05127	-0.11694	NaN	NaN	NaN	NaN	NaN	NaN
2.066	22.5266	-66.574	1382.7047	-2.3145	1.6523	-0.52441	-7.3542	-4.453306	-4.6794	0.10986	-0.041992	-0.049316	29.14092	74.621	404.628	-0.1167	0.062012	-0.13037	NaN	NaN	NaN	NaN	NaN	NaN
2.068	35.7549	-63.6075	1401.0193	-2.3081	1.6509	-0.54297	-7.001	-44.896	15.8845	0.094727	-0.032227	-0.043945	29.4055	90.313	592.508	-0.16309	0.080566	-0.14453	NaN	NaN	NaN	NaN	NaN	NaN
2.07	21.6815	-56.019	1392.768	-2.2773	1.6348	-0.54688	10.3847	26.1799	4.8269	0.080078	-0.016602	-0.049073	16.9083	93.927	792.419	-0.20947	0.09375	-0.14746	NaN	NaN	NaN	NaN	NaN	NaN
2.072	63.669	-54.227	1395.102	-2.1948	1.5884	-0.5542	1.4457	-18.5522	-2.95369	0.069336	-0.0097656	-0.044434	96.071	96.24	982.968	-0.32275	0.11377	-0.17676	NaN	NaN	NaN	NaN	NaN	NaN
2.074	60.898	-61.937	1415.82553	-2.126	1.5503	-0.55688	-15.8548	-11.730666	6.8238	0.046875	-0.0053711	-0.045898	83.974	23.049	1207.361	-0.44336	0.14185	-0.198	NaN	NaN	NaN	NaN	NaN	NaN
2.076	51.45785	-58.84	1438.813	-2.0586	1.5176	-0.55273	-21.8236	42.632	-10.1866	0.045898	0.00048828	-0.044922	58.3784	-27.187	1404.3141	-0.58887	0.18652	-0.21289	NaN	NaN	NaN	NaN	NaN	NaN
2.078	64.729	-57.38539	1453.0483	-1.9663	1.4712	-0.54443	-15.954	-23.0303	-5.3056	0.032715	0.0029297	-0.042969	3.895	-87.732	1536.415	-0.85107	0.27686	-0.24316	NaN	NaN	NaN	NaN	NaN	NaN
2.08	84.74	-68.59	1427.7437	-1.9336	1.4473	-0.54443	10.675	22.7796	1.24882	0.021728	0.0068359	-0.041992	7.315	-61.017	1598.526	-1.0098	0.33691	-0.25684	NaN	NaN	NaN	NaN	NaN	NaN
2.082	123.736	-85.977	1421.3394	-1.8589	1.3872	-0.53271	-15.2986	6.2548	-15.4067	0.013672	0.014648	-0.049316	-45.078	-73.811	1610.638	-1.3584	0.48926	-0.28613	NaN	NaN	NaN	NaN	NaN	NaN
2.084	110.321	-77.764	1438.223	-1.8101	1.3516	-0.52344	-7.6818	-36.958	0.176	0.0097656	0.019043	-0.04541	-78.009	-107.499	1632.106	-1.6492	0.62622	-0.29736	NaN	NaN	NaN	NaN	NaN	NaN
2.086	123.103	-50.688	1450.251	-1.7671	1.311	-0.51709	7.5161	27.7989	-10.9653	0.0043945	0.023438	-0.057129	-113.402	-205.682	1630.51	-1.9644	0.77588	-0.28711	NaN	NaN	NaN	NaN	NaN	NaN
2.088	104.144	-25.589	1465.954	-1.7202	1.2622	-0.50342	0.6447	-13.8395	-17.8594	-0.0024414	0.021484	-0.0625	-171.528	-263.27	1570.86	-2.394	1.0122	-0.24365	NaN	NaN	NaN	NaN	NaN	NaN
2.09	87.029	-17.4765	1467.062	-1.7104	1.2427	-0.49756	5.913	-6.8665	-4.921	-0.014404	0.03003	-0.080567	-172.757	-304.5	1465.461	-2.6133	1.1504	-0.20361	NaN	NaN	NaN	NaN	NaN	NaN
2.092	81.022	-20.7925	1445.9268	-1.689	1.2085	-0.48486	3.503	39.789	8.4362	-0.038086	0.047363	-0.087891	-144.255	-340.56	1396.109	-3.0483	1.4888	-0.094238	NaN	NaN	NaN	NaN	NaN	NaN
2.094	102.23	-13.9587	1426.0179	-1.6812	1.19	-0.47437	14.947	-24.425	43.2052	-0.085449	0.064453	-0.10254	-182.814	-309.84	1316.147	-3.332	1.7968	-0.033204	NaN	NaN	NaN	NaN	NaN	NaN
2.096	96.594	1.6306	1404.906	-1.6733	1.1763	-0.46631	33.191	-9.137	61.4117	-0.12549	0.072266	-0.11182	-161.359	-261.47	1267.581	-3.5269	2.0942	-0.029297	NaN	NaN	NaN	NaN	NaN	NaN
2.098	53.744	28.893	1407.16327	-1.6577	1.1646	-0.45801	24.67834	-14.708	88.332	-0.22363	0.10059	-0.13818	-125.295	-160.825	1167.483	-3.4707	2.293	-0.11963	NaN	NaN	NaN	NaN	NaN	NaN
2.1	51.207	33.543	1410.5474	-1.6465	1.1602	-0.45215	17.7432	-31.4234	143.597	-0.31934	0.12426	-0.15429	-133.379	-119.873	1198.63	-3.293	2.2734	-0.1958	NaN	NaN	NaN	NaN	NaN	NaN
2.102	27.24678	23.028	1392.9036	-1.625	1.1563	-0.44531	44.875	51.728	220.4886	-0.44385	0.15674	-0.16748	-184.961	-94.03	1199.934	-2.6504	2.0195	-0.39648	NaN	NaN	NaN	NaN	NaN	NaN
2.104	39.4214	14.2332	1385.565	-1.6094	1.1553	-0.43824	32.823	24.5241	317.019	-0.65186	0.22021	-0.18506	-209.05	-153.05	1243.70189	-2.0713	1.686	-0.50586	NaN	NaN	NaN	NaN	NaN	NaN
2.106	40.974	13.6831	1379.3635	-1.5952	1.1499	-0.42969	9.8849038	48.7347	450.315	-0.77734	0.26611	-0.18994	-185.688	-151.76	1204.601	-1.5527	1.3203	-0.58398	NaN	NaN	NaN	NaN	NaN	NaN
2.108	41.817	20.0587	1368.2698	-1.5737	1.1392	-0.40186	82.562	89.364	585.189	-1.0698	0.38232	-0.20361	-162.432	-170.008	1189.684	-1.0938	0.94141	-0.6416	NaN	NaN	NaN	NaN	NaN	NaN
2.11	14.3545	44.3709	1347.805	-1.5659	1.1294	-0.4043	87.449	14.56706	754.902	-1.314	0.48902	-0.21387	-143.6509	-197.135	1193.266	-0.95117	0.82031	-0.66016	NaN	NaN	NaN	NaN	NaN	NaN
2.112	-12.6723	45.58132	1328.1932	-1.5425	1.1177	-0.39453	90.252	58.116	931.9912	-1.5781	0.61133	-0.21484	-128.644	-304.9345	1231.628	-0.80176	0.64941	-0.67871	NaN	NaN	NaN	NaN	NaN	NaN
2.114	-9.949	15.3101	1324.7943	-1.5117	1.0957	-0.38477	63.23	51.289	1029.4124	-1.9355	0.79102	-0.22119	-106.8679	-358.168	1236.332	-0.75098	0.60352	-0.69922	NaN	NaN	NaN	NaN	NaN	NaN
2.116	-15.3874	9.78	1303.8846	-1.4956	1.0806	-0.37451	-9.057	-22.815	1126.248	-2.1055	0.88867	-0.22266	-21.639	-400.439	1294.132	-0.68945	0.5625	-0.7168	NaN	NaN	NaN	NaN	NaN	NaN
2.118	16.3781	15.07	1288.7313	-1.4526	1.0435	-0.37158	-31.812	-8.66	1212.815	-2.3979	1.1177	-0.20264	2.831	-415.939	1332.099	-0.5874	0.50635	-0.7085	NaN	NaN	NaN	NaN	NaN	NaN
2.12	-13.7238	44.4374	1259.7629	-1.4246	1.0139	-0.36792	-65.767	-58.94	1253.296	-2.5808	1.3264	-0.15943	66.477	-446.644	1427.922	-0.53467	0.47754	-0.68115	NaN	NaN	NaN	NaN	NaN	NaN
2.122	-9.8975	61.4357	1244.7967	-1.3882	0.98486	-0.36035	-84.161	-75.0867	1308.425	-2.7417	1.5728	-0.1123	59.829	-431.914	1501.328	-0.44971	0.43066	-0.63672	NaN	NaN	NaN	NaN	NaN	NaN
2.124	-0.888999999999999	84.7949	1221.05	-1.3462	0.9458	-0.35303	-118.384	-62.687	1299.541	-2.8687	1.8716	-0.077148	57.43035	-409.428	1556.002	-0.42139	0.41651	-0.60498	NaN	NaN	NaN	NaN	NaN	NaN
2.126	24.482	97.3916	1191.7906	-1.3218	0.92529	-0.35303	-161.7436	-162.143	1309.217	-2.8804	1.9751	-0.07666	73.7733	-353.589	1559.1	-0.44092	0.42236	-0.58154	NaN	NaN	NaN	NaN	NaN	NaN
2.128	23.03157	68.8085	1193.473	-1.2788	0.88721	-0.34863	-167.4869	-167.624	1304.501	-2.769	2.0317	-0.14941	74.102	-290.1123	1563.45	-0.5498	0.47412	-0.54102	NaN	NaN	NaN	NaN	NaN	NaN
2.13	14.8204	75.6346	1173.9218	-1.2476	0.85913	-0.33814	-147.8816	-191.05	1222.58	-2.5534	1.9456	-0.24487	73.86	-225.924	1614.606	-0.64404	0.51807	-0.53271	NaN	NaN	NaN	NaN	NaN	NaN
2.132	40.5508	88.691	1164.6684	-1.2188	0.82813	-0.33691	-144.222	-223.921	1181.1	-2.2554	1.7993	-0.33057	77.046	-180.175	1610.0693	-0.88428	0.64307	-0.53271	NaN	NaN	NaN	NaN	NaN	NaN
2.134	55.544	110.706	1134.018	-1.1831	0.80518	-0.32129	-123.651	-156.09	1169.03	-1.8203	1.5537	-0.4043	107.019	-139.059	1613.72	-1.1445	0.81055	-0.54102	NaN	NaN	NaN	NaN	NaN	NaN
2.136	43.334	107.761	1122.2923	-1.1616	0.78564	-0.31396	-119.618	-132.106	1139.3913	-1.625	1.4258	-0.42578	124.326	-113.8	1616.482	-1.27	0.89893	-0.54443	NaN	NaN	NaN	NaN	NaN	NaN
2.138	38.518629	95.59	1111.99731	-1.1323	0.76123	-0.30615	-158.523	-97.462	1127.4021	-1.312	1.1899	-0.45752	90.0157	-112.343	1657.4948	-1.5034	1.1157	-0.54541	NaN	NaN	NaN	NaN	NaN	NaN
2.14	58.083	90.57278	1073.2886	-1.1028	0.73706	-0.29834	-163.263	-50.786	1109.114	-1.1521	1.0539	-0.47046	77.902	-112.476	1683.1659	-1.6636	1.313	-0.56299	NaN	NaN	NaN	NaN	NaN	NaN
2.142	44.0175	89.5106	1054.963	-1.0757	0.71436	-0.28613	-153.413	-124.905	1087.8796	-1.0342	0.94727	-0.49609	54.7312	-131.397	1685.261	-1.8164	1.5039	-0.60938	NaN	NaN	NaN	NaN	NaN	NaN
2.144	19.9694	101.465	1062.591	-1.0444	0.68408	-0.27246	-133.066	-141.807	1100.4233	-0.91162	0.83838	-0.53662	26.7338	-103.771	1725.641	-1.9834	1.7012	-0.67969	NaN	NaN	NaN	NaN	NaN	NaN
2.146	44.7437	110.719	1050.812	-1.0347	0.67041	-0.2627	-162.35	-145.746	1065.408	-0.84717	0.7876	-0.55518	20.4618	-124.1994	1807.7701	-2.0605	1.7617	-0.71484	NaN	NaN	NaN	NaN	NaN	NaN
2.148	50.064	114.551	1024.3471	-1.0039	0.64258	-0.24756	-130.6131	-208.78	1053.22	-0.69922	0.68359	-0.56445	-1.249	-145.85727	1854.934	-2.2324	1.8594	-0.77148	NaN	NaN	NaN	NaN	NaN	NaN
2.15	42.0787	106.266	1005.246	-0.98267	0.61987	-0.23706	-84.706	-221.433	1085.341	-0.58936	0.60107	-0.5625	-30.6825	-191.732	1879.383	-2.366	1.9192	-0.8103	NaN	NaN	NaN	NaN	NaN	NaN
2.152	16.8118	90.39	979.6537	-0.95947	0.60205	-0.22021	-59.07	-269.0306	1106.333	-0.49268	0.51416	-0.55811	-65.614	-181.917	1865.654	-2.5093	1.981	-0.84229	NaN	NaN	NaN	NaN	NaN	NaN
2.154	29.522	89.387	973.454	-0.9292	0.56689	-0.20654	-30.0974	-325.118	1158.0825	-0.38965	0.41992	-0.55762	-72.574	-189.478	1906.309	-2.6914	2.0664	-0.85742	NaN	NaN	NaN	NaN	NaN	NaN
2.156	-7.1309	105.2392	931.832	-0.91211	0.55371	-0.20264	-17.266	-323.514	1180.982	-0.35303	0.37744	-0.56201	-67.478	-171.041	1936.864	-2.7632	2.1138	-0.85986	NaN	NaN	NaN	NaN	NaN	NaN
2.158	-15.3743	123.2236	918.17	-0.87891	0.52344	-0.18848	20.489	-345.288	1222.03	-0.31396	0.31396	-0.56494	-78.423	-166.589	1947.561	-2.8379	2.1602	-0.86133	NaN	NaN	NaN	NaN	NaN	NaN
2.16	-7.722	132.95	882.271	-0.8562	0.49951	-0.17505	3.524	-312.034	1292.7704	-0.33545	0.29321	-0.56128	-61.183	-112.257	1870.12	-2.8271	2.1513	-0.85889	NaN	NaN	NaN	NaN	NaN	NaN
2.162	-17.1426	123.7539	848.28248	-0.83008	0.47559	-0.16357	23.924	-257.0052	1326.0607	-0.39404	0.29248	-0.55811	-15.0938	-100.5	1811.961	-2.6172	2.0918	-0.64844	NaN	NaN	NaN	NaN	NaN	NaN
2.164	-43.5898	124.2964	830.9132	-0.79248	0.44189	-0.1543	50.058	-265.2746	1349.774	-0.55029	0.35254	-0.53174	-52.757	-48.851	1771.572	-2.8022	2.1411	-0.88135	NaN	NaN	NaN	NaN	NaN	NaN
2.166	-48.7901	127.244	791.0827	-0.77344	0.4209	-0.14648	53.6519	-237.443	1374.486	-0.66992	0.41357	-0.51611	-69.146	-21.011	1778.902	-2.8394	2.2153	-0.97705	NaN	NaN	NaN	NaN	NaN	NaN
2.168	-32.4324	131.43	786.0311	-0.73438	0.38965	-0.13477	34.293	-231.656	1377.618	-0.94873	0.58057	-0.479	-36.13	52.982	1745.771	-2.7539	2.3105	-0.97559	NaN	NaN	NaN	NaN	NaN	NaN
2.17	-29.1808	153.0938	760.4247	-0.7085	0.36231	-0.12427	9.929	-242.393	1422.123	-1.1675	0.72315	-0.4663	47.1101	63.1621	1729.607	-2.6102	2.2718	-0.87329	NaN	NaN	NaN	NaN	NaN	NaN
2.172	-24.5339	140.4999	731.89803	-0.68359	0.33594	-0.11328	36.7374	-177.774	1433.61	-1.3647	0.87939	-0.46143	32.3835	102.884	1713.951	-2.4468	2.1782	-0.79053	NaN	NaN	NaN	NaN	NaN	NaN
2.174	-10.681	133.3875	714.0154	-0.65527	0.30469	-0.092773	52.875	-159.4	1414.524	-1.5879	1.1123	-0.47021	30.462	85.299	1755.444	-2.2026	2.0063	-0.76904	NaN	NaN	NaN	NaN	NaN	NaN
2.176	-22.3874	130.2122	685.7221	-0.64014	0.2915	-0.083496	49.922	-148.817	1446.028	-1.6816	1.2168	-0.49023	33.4416	135.521	1747.5892	-2.0938	1.8926	-0.77246	NaN	NaN	NaN	NaN	NaN	NaN
2.178	-10.639	138.8771	667.1917	-0.61279	0.26221	-0.066895	7.092	-136.636	1467.743	-1.8413	1.3892	-0.53369	38.3007	137.875	1732.6277	-1.9253	1.6392	-0.74365	NaN	NaN	NaN	NaN	NaN	NaN
2.18	2.29	148.89038	655.1502	-0.59107	0.24121	-0.052979	18.921	-203.7713	1477.8263	-1.929	1.4778	-0.5647	64.0394	165.796	1708.892	-1.8674	1.4944	-0.71655	NaN	NaN	NaN	NaN	NaN	NaN
2.182	7.223	132.96325	657.562	-0.5708	0.21582	-0.045898	-27.652	-183.0632	1529.117	-2.0039	1.5566	-0.58203	65.535	106.207	1729.984	-1.8374	1.4028	-0.7124	NaN	NaN	NaN	NaN	NaN	NaN
2.184	11.0252	117.1585	627.7402	-0.53271	0.19189	-0.030762	-48.519	-181.074	1544.586	-2.105	1.6392	-0.58545	104.011	105.5223	1721.0649	-1.8276	1.3481	-0.7124	NaN	NaN	NaN	NaN	NaN	NaN
2.186	28.9526	109.97596	580.0432	-0.51465	0.17676	-0.022461	-23.3295	-209.261	1583.817	-2.1621	1.668	-0.58301	105.818	68.582	1700.4562	-1.8242	1.3477	-0.71484	NaN	NaN	NaN	NaN	NaN	NaN
2.188	40.7229	115.575132	558.0897	-0.47559	0.14697	-0.012207	-42.1289	-156.048	1579.5595	-2.2515	1.7056	-0.59912	72.645	87.802	1666.9201	-1.8262	1.3555	-0.70117	NaN	NaN	NaN	NaN	NaN	NaN
2.19	34.7335	122.1232	534.5916	-0.44678	0.12623	-0.0063477	-71.68	-162.212	1587.264	-2.2851	1.7031	-0.62207	81.246	59.235	1670.455	-1.8247	1.376	-0.68897	NaN	NaN	NaN	NaN	NaN	NaN
2.192	45.0565	129.9025	510.316	-0.41748	0.10889	0.0014648	-61.355	-152.4225	1626.682	-2.3027	1.6836	-0.64453	49.1243	88.651	1656.15	-1.8237	1.397	-0.67334	NaN	NaN	NaN	NaN	NaN	NaN
2.194	52.436	121.34656	495.256	-0.37891	0.089355	0.0048828	-60.097	-113.2602	1623.075	-2.3008	1.6699	-0.68164	46.25336	125.821	1630.58	-1.7871	1.4004	-0.6543	NaN	NaN	NaN	NaN	NaN	NaN
2.196	55.523	104.433	481.462	-0.35986	0.068359	0.010742	-36.35219	-155.225	1614.188	-2.3008	1.6797	-0.68555	17.16	216.2918	1573.9996	-1.7559	1.4043	-0.64941	NaN	NaN	NaN	NaN	NaN	NaN
2.198	45.009	109.346	462.4714	-0.3252	0.05127	0.018555	-23.4666	-123.5985	1627.852	-2.2651	1.6899	-0.65674	-12.452	244.222	1548.547	-1.6772	1.3784	-0.63037	NaN	NaN	NaN	NaN	NaN	NaN
2.2	66.837	123.216	448.162	-0.30445	0.042725	0.024658	-32.598	-109.807	1572.943	-2.3457	1.7441	-0.72656	-56.526	288.575	1508.0111	-1.6111	1.3372	-0.61011	NaN	NaN	NaN	NaN	NaN	NaN
2.202	52.185	142.4278	413.5114	-0.28076	0.038574	0.02832	-5.887	-116.534	1579.021	-2.3379	1.7734	-0.74023	-113.585	265.873	1489.222	-1.5464	1.2935	-0.58398	NaN	NaN	NaN	NaN	NaN	NaN
2.204	38.6973	140.745	400.179	-0.25195	0.032715	0.033691	9.9284	-45.6931	1565.056	-2.269	1.8032	-0.7124	-117.872	282.192	1424.6792	-1.4824	1.2324	-0.55469	NaN	NaN	NaN	NaN	NaN	NaN
2.206	32.0639	132.915	372.1246	-0.23633	0.027832	0.036133	10.7227	-67.267	1565.188	-2.2109	1.7812	-0.6914	-105.098	241.902	1392.261	-1.4551	1.207	-0.5376	NaN	NaN	NaN	NaN	NaN	NaN
2.208	9.1957	124.72	344.0221	-0.2168	0.027344	0.038086	58.955	-49.2097	1601.79558	-2.1519	1.7485	-0.6748	-116.2105	243.5929	1330.187	-1.4102	1.1504	-0.50977	NaN	NaN	NaN	NaN	NaN	NaN
2.21	12.2782	111.7819	327.865471	-0.19239	0.022949	0.04248	40.9629	-0.277000000000001	1587.137	-2.0737	1.6958	-0.66357	-139.183	197.1283	1330.719	-1.373	1.1162	-0.48535	NaN	NaN	NaN	NaN	NaN	NaN
2.212	-0.571099999999999	108.9406	307.4261	-0.17725	0.026367	0.043457	46.149	-39.017	1606.983	-2.041	1.6563	-0.6582	-141.2148	225.251	1233.8181	-1.334	1.0918	-0.46484	NaN	NaN	NaN	NaN	NaN	NaN
2.214	-3.4483	110.1901	295.04084	-0.15332	0.025391	0.044434	70.416	-3.753	1612.3146	-1.9746	1.582	-0.65137	-133.608	212.9711	1174.394	-1.2808	1.0649	-0.43555	NaN	NaN	NaN	NaN	NaN	NaN
2.216	-18.4366	114.848	266.875	-0.14307	0.030273	0.040039	71.59	6.006	1583.076	-1.9317	1.5293	-0.63867	-144.529	243.093	1119.09	-1.2539	1.0498	-0.41797	NaN	NaN	NaN	NaN	NaN	NaN
2.218	-26.93981	108.325	247.785	-0.12646	0.037598	0.041016	89.44	-43.6506	1569.6262	-1.8931	1.481	-0.62646	-144.43	198.516	1121.2419	-1.1909	1.02	-0.37793	NaN	NaN	NaN	NaN	NaN	NaN
2.22	-4.736	103.614	238.0509	-0.11279	0.042725	0.041992	89.873	-19.7838	1571.885	-1.8369	1.4219	-0.60742	-115.632	218.719	1102.665	-1.1313	0.98535	-0.35156	NaN	NaN	NaN	NaN	NaN	NaN
2.222	-13.8933	102.8503	237.3761	-0.10059	0.046875	0.043457	73.084	-67.552	1582.5591	-1.8003	1.397	-0.60596	-108.2701	202.222	1051.897	-1.0596	0.93555	-0.32813	NaN	NaN	NaN	NaN	NaN	NaN
2.224	-15.2715	110.8404	218.8292	-0.090332	0.055664	0.041016	115.119	-55.534	1617.507	-1.73	1.3442	-0.59912	-111.30079	221.232	981.166	-0.9541	0.86133	-0.29785	NaN	NaN	NaN	NaN	NaN	NaN
2.226	-20.536	98.0665	209.8315	-0.087891	0.054688	0.039063	109.697	-0.708	1582.926	-1.6755	1.3059	-0.58716	-110.346	193.1175	942.469	-0.90186	0.82373	-0.28369	NaN	NaN	NaN	NaN	NaN	NaN
2.228	-21.5875	93.2878	213.6893	-0.07373	0.066895	0.040527	57.68	-17.5639	1547.105	-1.627	1.2734	-0.57617	-83.955	228.235	906.022	-0.80615	0.73877	-0.25635	NaN	NaN	NaN	NaN	NaN	NaN
2.23	-28.8436	91.8604	184.3932	-0.070068	0.071777	0.035401	70.965	30.2955	1513.4485	-1.5698	1.231	-0.55566	-61.551	237.546	839.294	-0.73316	0.67554	-0.23462	NaN	NaN	NaN	NaN	NaN	NaN
2.232	-18.063	87.79693	164.5904	-0.062988	0.071777	0.035156	33.9	57.667	1482.272	-1.5542	1.2173	-0.54541	-4.212	281.811	742.7833	-0.67334	0.61182	-0.21436	NaN	NaN	NaN	NaN	NaN	NaN
2.234	10.936	81.865	156.1675	-0.055176	0.084961	0.03418	31.0498	40.5168	1511.351	-1.5229	1.1899	-0.52295	3.496	241.717	689.041	-0.58594	0.53076	-0.18359	NaN	NaN	NaN	NaN	NaN	NaN
2.236	-0.468999999999999	87.8125	148.1369	-0.046387	0.083496	0.035156	-7.9998	97.37	1505.604	-1.5085	1.1692	-0.50757	-16.982	259.2436	636.883	-0.54883	0.49316	-0.17188	NaN	NaN	NaN	NaN	NaN	NaN
2.238	1.8295	90.413	128.4101	-0.039551	0.087891	0.034668	1.8725	69.8279	1460.2027	-1.4839	1.1509	-0.49951	8.418	226.3988	596.629	-0.4707	0.42725	-0.1499	NaN	NaN	NaN	NaN	NaN	NaN
2.24	15.5644	79.722	112.5879	-0.038574	0.092285	0.031006	-2.011	84.46553	1458.737	-1.4565	1.1255	-0.47998	23.136	262.682	545.042	-0.4104	0.38233	-0.13306	NaN	NaN	NaN	NaN	NaN	NaN
2.242	31.314	71.0267	116.939	-0.032715	0.094727	0.03125	-74.218	137.125	1399.4638	-1.4292	1.1079	-0.47314	11.188	225.71	506.241	-0.34766	0.33594	-0.12207	NaN	NaN	NaN	NaN	NaN	NaN
2.244	42.1102	67.64788	121.724	-0.031738	0.095215	0.032227	-58.4692	106.4298	1372.57019	-1.3711	1.0664	-0.45996	23.759	234.901	486.8738	-0.27539	0.28857	-0.091309	NaN	NaN	NaN	NaN	NaN	NaN
2.246	43.0566	68.335	103.7594	-0.028809	0.097168	0.030762	-40.628	131.3252	1354.4527	-1.3203	1.0249	-0.44629	4.828	217.43	465.907	-0.24463	0.25977	-0.080078	NaN	NaN	NaN	NaN	NaN	NaN
2.248	22.8539	69.5683	91.111	-0.020996	0.095215	0.034668	-70.906	108.388	1316.7885	-1.269	0.98682	-0.43896	-18.324	278.845	441.255	-0.17383	0.2168	-0.055176	NaN	NaN	NaN	NaN	NaN	NaN
2.25	44.0374	72.4531	90.822	-0.013184	0.091309	0.032715	-76.912	56.467	1333.5996	-1.2046	0.93213	-0.42529	-16.879	270.828	385.9952	-0.13159	0.1875	-0.037353	NaN	NaN	NaN	NaN	NaN	NaN
2.252	44.468	70.43	106.736	-0.010742	0.084473	0.03418	-76.51	106.902	1288.094	-1.1777	0.90234	-0.41797	-61.0282	272.565	367.99	-0.094727	0.16162	-0.016602	NaN	NaN	NaN	NaN	NaN	NaN
2.254	28.7958	67.415	85.412	-0.00097656	0.076172	0.036621	-119.48	98.965	1242.1715	-1.1289	0.84961	-0.39453	-42.075	191.651	325.0495	-0.055664	0.13672	-0.00097656	NaN	NaN	NaN	NaN	NaN	NaN
2.256	19.236	68.844	60.6913	0.005371	0.068116	0.039795	-86.557504	150.3668	1231.03509	-1.1045	0.81396	-0.37964	-42.8356	192.9257	289.235	-0.040039	0.12109	0.0058594	NaN	NaN	NaN	NaN	NaN	NaN
2.258	34.9375	63.873	62.8847	0.018066	0.060547	0.049805	-68.8765	188.729	1190.354	-1.084	0.78223	-0.3623	-19.408	146.659	231.713	-0.012695	0.093262	0.029297	NaN	NaN	NaN	NaN	NaN	NaN
2.26	16.4591	47.106	61.0526	0.032227	0.044434	0.046875	-70.9585	139.6269	1173.8157	-1.062	0.74072	-0.34277	-53.6289	167.663	224.5708	-0.0026855	0.076416	0.036133	NaN	NaN	NaN	NaN	NaN	NaN
2.262	-10.906	40.795	43.8166	0.043457	0.03125	0.044434	-23.426	175.691	1162.7074	-1.0449	0.72266	-0.3418	-63.279	115.797	190.8758	0.00097656	0.057129	0.044922	NaN	NaN	NaN	NaN	NaN	NaN
2.264	9.367	30.5355	57.4179	0.064941	0.013184	0.050781	-34.9289	172.561	1114.7462	-1.0151	0.68457	-0.31592	-97.517	154.2188	172.531	-0.0029297	0.044922	0.055176	NaN	NaN	NaN	NaN	NaN	NaN
2.266	5.8737	15.706	51.7989	0.07666	0.001709	0.057617	-9.702	161.22	1130.381	-0.98072	0.65943	-0.30029	-89.9349	130.1313	112.8154	-0.0092776	0.035156	0.061035	NaN	NaN	NaN	NaN	NaN	NaN
2.268	-19.5624	19.334	33.83476	0.089355	-0.016113	0.05957	-2.851	209.532	1077.025	-0.94482	0.63525	-0.28027	-73.889	180.548	108.024	-0.022949	0.025391	0.068848	NaN	NaN	NaN	NaN	NaN	NaN
2.27	-22.6199	34.1199	26.8839	0.10303	-0.038574	0.064453	-7.063	170.73456	1012.8759	-0.89209	0.59619	-0.25635	-83.0058	126.491	90.967	-0.052734	0.01709	0.08252	NaN	NaN	NaN	NaN	NaN	NaN
2.272	-23.8508	32.4363	24.7865	0.11084	-0.042969	0.066895	28.327	170.2916	977.305	-0.86133	0.5752	-0.24805	-85.7941	124.167	99.3916	-0.065918	0.012695	0.081055	NaN	NaN	NaN	NaN	NaN	NaN
2.274	-11.905	42.487	37.663	0.12549	-0.063965	0.071289	26.979	167.0906	937.532	-0.80371	0.53516	-0.23047	-77.2147	73.048	73.036	-0.091797	0.0073242	0.094727	NaN	NaN	NaN	NaN	NaN	NaN
2.276	-16.57	31.034	27.9082	0.12866	-0.081299	0.079101	1.48	130.015	941.305	-0.75537	0.49633	-0.21557	-95.57	78.3998	63.05827	-0.11499	0.0051269	0.10498	NaN	NaN	NaN	NaN	NaN	NaN
2.278	-42.7755	10.0966426	20.099	0.1333	-0.088379	0.079102	22.365	174.053	924.572	-0.70313	0.46484	-0.19873	-41.1635	16.247	22.53109	-0.13916	0.0039063	0.1123	NaN	NaN	NaN	NaN	NaN	NaN
2.28	-23.68308	4.9941	20.2147	0.13379	-0.097168	0.086426	4.724	173.983	871.547	-0.63037	0.40967	-0.17773	-10.279	16.32515	54.801	-0.16504	0.01123	0.11719	NaN	NaN	NaN	NaN	NaN	NaN
2.282	-20.5684	-1.9396	41.9726	0.12744	-0.09668	0.09082	-3.816	159.3567	840.505	-0.59326	0.38428	-0.17041	19.746	-17.0282	29.3616	-0.17871	0.01123	0.12256	NaN	NaN	NaN	NaN	NaN	NaN
2.284	-22.7477	16.6194	18.5451	0.12207	-0.10156	0.085938	-11.281	191.781	793.9517	-0.52393	0.33643	-0.15723	8.724	14.4794	24.8384	-0.20361	0.012207	0.125	NaN	NaN	NaN	NaN	NaN	NaN
2.286	-18.737	17.49151	8.7548	0.1084	-0.098633	0.094238	-5.915	172.1438	769.0055	-0.47095	0.30151	-0.14087	42.6058	-0.2049	-21.2267	-0.22216	0.014893	0.12695	NaN	NaN	NaN	NaN	NaN	NaN
2.288	11.115	12.1369	15.5482	0.098145	-0.09375	0.096191	0.690999999999995	193.41	764.463	-0.41748	0.27002	-0.12549	26.1264	-15.5841	5.8837	-0.24805	0.018555	0.13232	NaN	NaN	NaN	NaN	NaN	NaN
2.29	2.153	10.2283	11.3178	0.077637	-0.081543	0.099609	-16.37	204.7831	711.6594	-0.35352	0.22803	-0.11328	44.382	-52.734	-6.5241	-0.2793	0.021973	0.13623	NaN	NaN	NaN	NaN	NaN	NaN
2.292	-4.459	5.13828	5.15085	0.070313	-0.074219	0.10547	-57.1157	155.426	683.765	-0.32666	0.20898	-0.104	69.5614	-42.186	31.117	-0.3042	0.025391	0.13477	NaN	NaN	NaN	NaN	NaN	NaN
2.294	14.3276	-2.5427	9.639678	0.050781	-0.055664	0.11133	-46.5841	174.8065	633.341	-0.28174	0.17627	-0.084961	76.4592	-24.5404	-0.0696000000000003	-0.34473	0.036133	0.1333	NaN	NaN	NaN	NaN	NaN	NaN
2.296	32.2056	-5.8052	24.762	0.035889	-0.040039	0.11181	-72.468454	165.1038	566.466	-0.25903	0.1521	-0.071289	50.722	8.5899	22.00558	-0.38282	0.049805	0.13965	NaN	NaN	NaN	NaN	NaN	NaN
2.298	32.6345	1.2757	38.6891	0.023926	-0.030273	0.11328	-73.525	146.468	539.6559	-0.23633	0.13184	-0.059082	56.4513	9.2331	8.3016	-0.41406	0.064453	0.15332	NaN	NaN	NaN	NaN	NaN	NaN
2.3	24.7553	3.1794	18.52946	0.0092773	-0.013184	0.11914	-64.7443	170.38469	494.225	-0.21143	0.11279	-0.040039	5.769	38.447	29.4938	-0.46436	0.084473	0.15674	NaN	NaN	NaN	NaN	NaN	NaN
2.302	23.4143	2.72184	9.54467	0.003418	-0.0058594	0.11816	-100.96	127.952	471.2194	-0.20557	0.10205	-0.033691	20.37	59.629	-17.383	-0.48193	0.09375	0.16309	NaN	NaN	NaN	NaN	NaN	NaN
2.304	38.0552	3.06943	13.9606	-0.00048828	0.0078125	0.11914	-84.914	126.893	445.6119	-0.19482	0.082031	-0.016113	29.1079	69.446	-17.0357	-0.51709	0.12061	0.17041	NaN	NaN	NaN	NaN	NaN	NaN
2.306	40.7606	10.482	28.0532	-0.0048828	0.015869	0.11817	-85.652	139.475	403.075	-0.19312	0.069824	-0.0095216	29.666	56.523	-36.474	-0.53638	0.13208	0.17896	NaN	NaN	NaN	NaN	NaN	NaN
2.308	25.6711	17.9374	12.2499	-0.011719	0.024414	0.11279	-71.9605	120.319	380.8733	-0.19287	0.062988	0.00048828	-8.845	26.539	-17.162	-0.54004	0.14063	0.18896	NaN	NaN	NaN	NaN	NaN	NaN
2.31	21.01813	13.1313	5.999	-0.014648	0.030762	0.11035	-31.48	166.843	342.7975	-0.20068	0.059082	0.012207	-11.49	31.0153	-40.27	-0.53027	0.15186	0.20166	NaN	NaN	NaN	NaN	NaN	NaN
2.312	24.7606	1.9825	12.7175	-0.018555	0.035645	0.104	-61.9462	161.425	296.069	-0.20654	0.056152	0.027344	-38.02971	21.1962	-10.763	-0.51611	0.15674	0.20996	NaN	NaN	NaN	NaN	NaN	NaN
2.314	11.168	-2.0161	-0.096388	-0.029297	0.050293	0.09375	-33.089	136.3394	290.4731	-0.21924	0.054199	0.043945	-36.6583	38.457	-11.5304	-0.47266	0.14111	0.2207	NaN	NaN	NaN	NaN	NaN	NaN
2.316	4.949	-5.8219	15.0986	-0.035156	0.060303	0.080566	-5.073	146.3084	252.943	-0.23413	0.056397	0.053711	-62.82	6.1386	33.8519	-0.42945	0.12354	0.22852	NaN	NaN	NaN	NaN	NaN	NaN
2.318	9.969	-27.5273	50.4494	-0.043945	0.071289	0.064941	-17.2166	86.598	246.8009	-0.24512	0.056152	0.064941	-78.1607	37.66093	33.4995	-0.37207	0.095703	0.23682	NaN	NaN	NaN	NaN	NaN	NaN
2.32	-3.478	-38.4585	55.7209	-0.057129	0.098633	0.052734	16.147	82.218	249.176	-0.25537	0.068848	0.080566	-90.713	33.5414	19.1562	-0.28711	0.041016	0.23975	NaN	NaN	NaN	NaN	NaN	NaN
2.322	-25.8614	-31.958	79.3597	-0.070313	0.10986	0.043945	16.9553	109.6992	198.7213	-0.25537	0.073242	0.084961	-54.8221	66.542	15.9597	-0.23877	0.01123	0.24707	NaN	NaN	NaN	NaN	NaN	NaN
2.324	-26.566	-17.473	118.5188	-0.10303	0.13281	0.021484	6.176	87.131	168.9723	-0.25879	0.085938	0.10303	-95.945	11.8976	33.6276	-0.1499	-0.053711	0.25146	NaN	NaN	NaN	NaN	NaN	NaN
2.326	-43.021	-14.749	184.1707	-0.13891	0.15405	0.001709	62.9602	135.058	122.132	-0.2561	0.092774	0.11231	-88.227	34.708	37.4494	-0.085695	-0.099612	0.25415	NaN	NaN	NaN	NaN	NaN	NaN
2.328	-97.51617	-9.6267	247.932	-0.18311	0.18164	-0.01416	27.0626	120.335	95.259	-0.25195	0.10449	0.12256	-50.0833	-2.9636	42.633	-0.021973	-0.14404	0.2583	NaN	NaN	NaN	NaN	NaN	NaN
2.33	-94.671	-20.3367	274.045	-0.2583	0.22363	-0.044434	23.4099	91.25	126.809	-0.23633	0.10547	0.12939	-32.83587	37.901	10.639	0.052246	-0.19873	0.24463	NaN	NaN	NaN	NaN	NaN	NaN
2.332	-125.521	-50.931	358.878	-0.30469	0.24414	-0.055176	84.161	99.543	119.2207	-0.22412	0.10693	0.13135	-28.82121	-0.32	31.5823	0.087891	-0.22607	0.24219	NaN	NaN	NaN	NaN	NaN	NaN
2.334	-110.478	-57.774	483.4258	-0.41357	0.28955	-0.088867	58.661	50.0072	111.4854	-0.20752	0.10645	0.13867	-14.389	36.405	57.435	0.15625	-0.26904	0.23291	NaN	NaN	NaN	NaN	NaN	NaN
2.336	-127.075	-56.4043	570.3137	-0.51514	0.32739	-0.10791	55.953	66.679	101.0898	-0.19336	0.104	0.1416	-27.421	4.08612	35.8945	0.2041	-0.30152	0.22119	NaN	NaN	NaN	NaN	NaN	NaN
2.338	-129.155	-47.488	611.1502	-0.63086	0.37109	-0.12695	41.4456	87.8269	71.5877	-0.19141	0.10107	0.14404	-4.878	50.193	10.34246	0.24561	-0.33301	0.21631	NaN	NaN	NaN	NaN	NaN	NaN
2.34	-103.9947	-60.258	612.2523	-0.81689	0.44189	-0.13818	22.839	71.9411	60.376	-0.18555	0.09668	0.14502	30.6178	3.71651	12.9394	0.29297	-0.35547	0.20215	NaN	NaN	NaN	NaN	NaN	NaN
2.342	-65.4202	-74.715	670.492261	-0.92773	0.48828	-0.14111	31.251	111.742	33.8677	-0.17895	0.091797	0.14477	42.3409	18.8391	29.713	0.31348	-0.36621	0.19678	NaN	NaN	NaN	NaN	NaN	NaN
2.344	-33.206	-45.992	728.5752	-1.1602	0.5957	-0.14648	6.231	81.041	14.3922	-0.17627	0.083008	0.14258	46.1572	-23.31201	29.5665	0.33838	-0.38184	0.19092	NaN	NaN	NaN	NaN	NaN	NaN
2.346	-6.065	-40.8641	778.136	-1.3413	0.67138	-0.1499	-23.7333	36.3838	23.1453	-0.17285	0.074707	0.14111	46.914	13.4305	26.1811	0.34424	-0.37232	0.18628	NaN	NaN	NaN	NaN	NaN	NaN
2.348	40.629	-41.166	819.5859	-1.5098	0.75684	-0.1543	-1.107	41.725	29.5376	-0.16748	0.067383	0.14111	50.054	-27.836	8.1602	0.3457	-0.36719	0.18506	NaN	NaN	NaN	NaN	NaN	NaN
2.35	41.592	-40.97996	863.3534	-1.7012	0.875	-0.16895	-26.4721	5.7238	37.2986	-0.1543	0.060547	0.13721	52.9972	-1.3031	19.644	0.32764	-0.34521	0.18457	NaN	NaN	NaN	NaN	NaN	NaN
2.352	27.763	-28.472	897.6631	-1.7769	0.9458	-0.17627	-35.3605	12.52	28.922	-0.14526	0.054443	0.13819	50.82842	-50.727	22.3833	0.31641	-0.33008	0.18457	NaN	NaN	NaN	NaN	NaN	NaN
2.354	44.799	-45.2613	914.25118	-1.873	1.0996	-0.18262	-38.5379	13.9871	6.789	-0.12793	0.047363	0.14014	25.385	9.6612	11.8502	0.28223	-0.29443	0.18457	NaN	NaN	NaN	NaN	NaN	NaN
2.356	56.3537	-72.317	953.0241	-1.9057	1.2182	-0.17994	-61.811	-11.872	20.007	-0.1001	0.029785	0.13574	63.0729	-3.271	-5.2083	0.25245	-0.26465	0.18946	NaN	NaN	NaN	NaN	NaN	NaN
2.358	97.418	-62.398	994.8	-1.9194	1.3306	-0.17334	-29.5331	29.1606	9.7792	-0.083008	0.019531	0.13281	38.8646	25.4394	-5.0942	0.22168	-0.23389	0.18848	NaN	NaN	NaN	NaN	NaN	NaN
2.36	99.876	-51.946	1028.025	-1.8848	1.4414	-0.18408	-54.143	29.154	-10.9932	-0.041992	0.0019531	0.13232	0.937999999999999	-21.834	-6.0648	0.18994	-0.19336	0.18896	NaN	NaN	NaN	NaN	NaN	NaN
2.362	77.361	-38.741	1025.572	-1.8584	1.4688	-0.18896	-32.6664	23.0826	-0.188000000000001	-0.0083008	-0.017334	0.13062	-25.662	9.6	-17.8162	0.17725	-0.17432	0.19141	NaN	NaN	NaN	NaN	NaN	NaN
2.364	58.7342	-58.729	1026.4037	-1.7729	1.4634	-0.21484	-23.3227	31.875	3.2059	0.024414	-0.03125	0.12793	8.155	5.301	-31.7347	0.15674	-0.1416	0.19092	NaN	NaN	NaN	NaN	NaN	NaN
2.366	86.804	-84.721	1022.3022	-1.7004	1.4163	-0.24097	-60.156	-5.782	8.722	0.06543	-0.055664	0.12598	-25.339	42.9448	-6.929	0.15014	-0.12378	0.19507	NaN	NaN	NaN	NaN	NaN	NaN
2.368	81.229	-115.2159	1025.4588	-1.6191	1.3613	-0.25586	-11.663	-5.775	17.4921	0.084961	-0.06543	0.13037	-25.943	26.1056	-4.66939	0.14844	-0.098633	0.20215	NaN	NaN	NaN	NaN	NaN	NaN
2.37	47.165	-140.141	1025.1819	-1.4883	1.2813	-0.23779	8.3432	9.1065	7.097	0.12451	-0.09082	0.1333	-79.0896	48.56	8.2919	0.146	-0.095703	0.20264	NaN	NaN	NaN	NaN	NaN	NaN
2.372	72.794	-137.976	1033.593	-1.4277	1.2451	-0.21484	-4.518	-16.2008	25.534	0.1499	-0.11231	0.13672	-86.4148	48.1961	-25.336	0.14355	-0.094727	0.19531	NaN	NaN	NaN	NaN	NaN	NaN
2.374	86.348	-135.6168	1045.362	-1.3042	1.1743	-0.17676	47.9239	10.54021	40.35	0.17041	-0.13037	0.13477	-79.7094	73.861	-28.40187	0.13916	-0.095703	0.19873	NaN	NaN	NaN	NaN	NaN	NaN
2.376	78.747	-104.229	1040.4219	-1.2212	1.1255	-0.16138	20.734	22.9167	19.0802	0.19336	-0.15527	0.13281	-53.147	56.94771	-16.6228	0.13232	-0.099365	0.19384	NaN	NaN	NaN	NaN	NaN	NaN
2.378	56.978	-107.2536	1050.0102	-1.1401	1.0864	-0.14795	32.78	11.0241	1.531	0.21191	-0.16748	0.13721	-96.732	41.631	28.611	0.12305	-0.10156	0.18945	NaN	NaN	NaN	NaN	NaN	NaN
2.38	64.316	-127.894	1063.4642	-1.0522	1.0415	-0.14307	76.993	13.7753	-7.73429	0.23438	-0.18115	0.13281	-75.1563	34.609	24.4525	0.099121	-0.10156	0.18115	NaN	NaN	NaN	NaN	NaN	NaN
2.382	12.005	-142.183	1078.777331	-1.0112	1.0259	-0.14795	37.9184	-25.0881	-1.32349	0.24878	-0.19751	0.13257	-53.8845	35.3418	36.583	0.089355	-0.10059	0.17578	NaN	NaN	NaN	NaN	NaN	NaN
2.384	-39.355	-154.645	1090.8329	-0.94775	0.98486	-0.12891	60.509	-28.4334	22.564	0.26416	-0.20361	0.13232	-24.041	20.164	9.29647	0.071289	-0.09375	0.17139	NaN	NaN	NaN	NaN	NaN	NaN
2.386	-69.635	-152.7236	1112.115	-0.91016	0.94727	-0.1084	92.743	-13.0481	10.12	0.27734	-0.20703	0.11914	-44.5076	-0.68502	52.409	0.057373	-0.087402	0.16577	NaN	NaN	NaN	NaN	NaN	NaN
2.388	-68.209	-148.362	1109.024	-0.90527	0.92969	-0.092773	31.036	-38.051	21.1712	0.2832	-0.20215	0.12842	-28.942	5.84328	42.128	0.052246	-0.080566	0.15869	NaN	NaN	NaN	NaN	NaN	NaN
2.39	-59.801	-141.847	1095.9417	-0.90234	0.89648	-0.064941	56.999	-15.0851	18.9025	0.28906	-0.19922	0.12793	-25.377	5.4295	34.0756	0.044434	-0.070801	0.14941	NaN	NaN	NaN	NaN	NaN	NaN
2.392	-63.681	-159.046	1087.139	-0.90625	0.86963	-0.040772	37.1842	7.328	1.376	0.28833	-0.18823	0.13305	43.71896	46.678	1.774	0.034668	-0.065918	0.14648	NaN	NaN	NaN	NaN	NaN	NaN
2.394	-84.651	-171.7464	1096.113	-0.90967	0.84619	-0.029785	36.2192	18.2629	2.514	0.28027	-0.17871	0.13672	27.7117	16.9304	42.9176	0.021973	-0.056152	0.1333	NaN	NaN	NaN	NaN	NaN	NaN
2.396	-71.067	-175.278	1147.8599	-0.89209	0.79736	-0.025879	51.511	46.662	-8.9867	0.27002	-0.1665	0.14697	9.099	35.118	38.809	0.012695	-0.050293	0.125	NaN	NaN	NaN	NaN	NaN	NaN
2.398	-47.3054	-159.291	1177.5997	-0.87646	0.76807	-0.030762	-2.1918	6.432	-8.337	0.26025	-0.1626	0.15039	20.277	10.2684	56.997	0.00097656	-0.042969	0.12207	NaN	NaN	NaN	NaN	NaN	NaN
2.4	-43.1006	-160.751	1198.57389	-0.83887	0.70117	-0.054688	-5.079	-21.3066	11.6793	0.24023	-0.14844	0.15869	52.0808	43.472	15.7613	-0.015137	-0.041016	0.10889	NaN	NaN	NaN	NaN	NaN	NaN
2.402	-44.047	-183.507	1223.584	-0.81494	0.65039	-0.074951	-14.0042	-23.0873	-4.5057	0.21436	-0.13575	0.15649	44.5677	3.989	34.616	-0.031739	-0.030762	0.10327	NaN	NaN	NaN	NaN	NaN	NaN
2.404	-22.356	-179.288	1225.933	-0.79834	0.60596	-0.096191	-36.98671	-33.3426	-1.0433	0.18848	-0.125	0.15967	52.9229	26.8744	41.0979	-0.048828	-0.025391	0.099121	NaN	NaN	NaN	NaN	NaN	NaN
2.406	-36.27	-161.107	1234.107	-0.81592	0.56201	-0.12988	-14.5374	-8.6221	-12.4999	0.15332	-0.11426	0.16943	49.0215	-27.2913	44.844	-0.071289	-0.0063477	0.085449	NaN	NaN	NaN	NaN	NaN	NaN
2.408	-48.698	-141.02162	1244.4796	-0.83789	0.55273	-0.14453	-52.504	9.08802	-30.49	0.13184	-0.10498	0.16797	32.019	19.818	-6.6482	-0.078125	0	0.081055	NaN	NaN	NaN	NaN	NaN	NaN
2.41	-49.7326	-152.706	1291.936	-0.91016	0.55664	-0.17041	-38.5061	18.194	-16.2158	0.10107	-0.09082	0.16943	38.5831	-26.1087	-14.4108	-0.098145	0.019531	0.070313	NaN	NaN	NaN	NaN	NaN	NaN
2.412	-45.508	-147.268	1308.643	-0.98877	0.57592	-0.1853	-17.6952	32.573	-17.8578	0.07788	-0.078369	0.16381	22.19	-0.345000000000001	-12.9227	-0.11621	0.033692	0.066894	NaN	NaN	NaN	NaN	NaN	NaN
2.414	-10.113	-146.089	1295.888	-1.0776	0.61084	-0.19434	-52.741	12.9062	-19.6224	0.058594	-0.068848	0.16162	-13.145	-47.152	22.968	-0.12598	0.047852	0.064941	NaN	NaN	NaN	NaN	NaN	NaN
2.416	15.074	-142.352	1296.8417	-1.2207	0.67773	-0.20459	-32.0765	-0.979999999999999	15.3309	0.040039	-0.053711	0.16064	24.979	21.4695	-5.01022	-0.14355	0.062988	0.05957	NaN	NaN	NaN	NaN	NaN	NaN
2.418	27.426	-141.351	1294.7017	-1.2949	0.70898	-0.2124	-30.04048	-1.5986	8.865	0.029297	-0.045898	0.15723	5.329	-12.1581	10.111	-0.15332	0.071289	0.058594	NaN	NaN	NaN	NaN	NaN	NaN
2.42	6.623	-130.9621	1305.0304	-1.4453	0.79102	-0.23975	-42.342	-11.0914	8.98583	0.014648	-0.027832	0.15186	-28.5726	-8.6069	45.997	-0.17432	0.089355	0.05127	NaN	NaN	NaN	NaN	NaN	NaN
2.422	24.908	-103.45	1299.0397	-1.5644	0.87646	-0.25024	16.2974	10.0367	1.330761	0.0051269	-0.010498	0.14697	-67.802	-89.294	110.8913	-0.1914	0.10059	0.03833	NaN	NaN	NaN	NaN	NaN	NaN
2.424	30.343	-115.75	1308.3473	-1.6855	0.9707	-0.24805	-14.8176	26.1665	-19.5858	-0.003418	-0.00097656	0.14404	-92.876	-4.2806	159.0359	-0.20459	0.11279	0.024414	NaN	NaN	NaN	NaN	NaN	NaN
2.426	35.984	-135.054	1328.039	-1.8433	1.104	-0.2373	-14.0501	13.8721	5.941	-0.012207	0.01416	0.13184	-41.0236	2.349	206.679	-0.23096	0.1333	-0.003418	NaN	NaN	NaN	NaN	NaN	NaN
2.428	20.804	-132.322	1344.184	-1.9194	1.1763	-0.23242	48.277	26.117	3.4276	-0.019531	0.021484	0.13232	-70.3508	70.836	318.028	-0.24658	0.14697	-0.021484	NaN	NaN	NaN	NaN	NaN	NaN
2.43	-5.18	-125.1357	1324.6167	-2.0391	1.3066	-0.22852	-0.232999999999999	13.012	-10.2026	-0.024902	0.031738	0.12695	-119.172	12.947	521.852	-0.29492	0.1792	-0.05127	NaN	NaN	NaN	NaN	NaN	NaN
2.432	-19.119	-96.315	1322.7815	-2.0889	1.3838	-0.23096	43.8011	15.78621	17.9051	-0.03418	0.041748	0.11963	-136.837	78.4949	723.81	-0.34473	0.20874	-0.083496	NaN	NaN	NaN	NaN	NaN	NaN
2.434	-49.137	-94.915	1332.77792	-2.1016	1.4414	-0.23828	69.16	16.4619	11.8389	-0.035645	0.053223	0.11377	-76.215	15.696	910.516	-0.41064	0.23975	-0.12695	NaN	NaN	NaN	NaN	NaN	NaN
2.436	-78.597	-87.02	1322.8584	-2.0679	1.4829	-0.23535	39.2055	-5.0115	14.1447	-0.047363	0.062988	0.099609	-98.412	32.2005	1093.249	-0.52783	0.29199	-0.19434	NaN	NaN	NaN	NaN	NaN	NaN
2.438	-83.3114	-99.502	1323.8699	-2.0288	1.4868	-0.22119	77.124	11.06378	29.963	-0.046875	0.071777	0.10303	-107.8802	-89.279	1242.882	-0.59961	0.32813	-0.23096	NaN	NaN	NaN	NaN	NaN	NaN
2.44	-74.1451	-119.9437	1324.8673	-1.9761	1.4692	-0.23633	50.571	26.4509	9.5161	-0.056152	0.083008	0.094727	-85.6644	-57.817	1367.061	-0.76709	0.40381	-0.30029	NaN	NaN	NaN	NaN	NaN	NaN
2.442	-78.9175	-111.47	1316.50286	-1.9741	1.4683	-0.27929	42.921	11.9385	21.7344	-0.067627	0.086914	0.085449	-69.2388	-61.032	1426.973	-0.92823	0.4917	-0.33399	NaN	NaN	NaN	NaN	NaN	NaN
2.444	-105.15851	-96.635	1315.008	-1.9551	1.4648	-0.29297	70.915	13.5591	28.296	-0.074707	0.087402	0.069824	-42.4885	-9.79900000000001	1424.791	-1.127	0.58789	-0.36328	NaN	NaN	NaN	NaN	NaN	NaN
2.446	-75.318	-71.674	1316.2299	-1.9038	1.4419	-0.26074	29.7219	13.7023	11.1741	-0.089355	0.10059	0.050293	7.351	-83.949	1435.977	-1.4409	0.74463	-0.37402	NaN	NaN	NaN	NaN	NaN	NaN
2.448	-92.6787	-67.252	1314.7042	-1.8887	1.4277	-0.24707	30.2913	8.555	25.584	-0.10156	0.10547	0.046875	63.389	-111.689	1496.628	-1.6069	0.8374	-0.37451	NaN	NaN	NaN	NaN	NaN	NaN
2.45	-93.06441	-70.163	1327.2554	-1.8433	1.4028	-0.23779	29.8758	-16.0047	39.762	-0.12695	0.12207	0.035156	157.7797	-200.235	1481.101	-1.9526	1.0317	-0.32129	NaN	NaN	NaN	NaN	NaN	NaN
2.452	-78.3212	-52.1823	1326.0138	-1.8008	1.3789	-0.22339	-4.316	-67.37	63.7859	-0.16285	0.12915	0.020752	152.426	-248.65	1464.283	-2.2115	1.1831	-0.25317	NaN	NaN	NaN	NaN	NaN	NaN
2.454	-86.42774	-40.728	1339.7732	-1.752	1.3457	-0.21338	10.541	-70.308	110.2537	-0.20947	0.14307	-0.0039063	197.323	-321.56	1412.808	-2.4644	1.3286	-0.17725	NaN	NaN	NaN	NaN	NaN	NaN
2.456	-94.425	-41.007	1347.51173	-1.6851	1.2915	-0.19922	-2.377	-35.9061	124.35941	-0.29004	0.16553	-0.042969	195.556	-330.219	1408.047	-2.7417	1.5435	-0.104	NaN	NaN	NaN	NaN	NaN	NaN
2.458	-112.7349	-35.384	1336.53908	-1.6528	1.2622	-0.19434	-39.4956	-34.4901	189.5984	-0.32568	0.18799	-0.062012	208.764	-292.9238	1361.763	-2.8418	1.6523	-0.085938	NaN	NaN	NaN	NaN	NaN	NaN
2.46	-101.8185	-37.887	1314.85137	-1.5991	1.2095	-0.19238	-55.5219	-12.426	288.247	-0.43262	0.22461	-0.096191	194.243	-214.658	1307.4409	-2.8862	1.8501	-0.021973	NaN	NaN	NaN	NaN	NaN	NaN
2.462	-87.6915	-39.316	1293.6178	-1.5594	1.1731	-0.19141	-87.6533	25.3751	381.524	-0.53589	0.25635	-0.10034	207.606	-138.14	1248.196	-2.7631	1.9068	0.050049	NaN	NaN	NaN	NaN	NaN	NaN
2.464	-60.566	-40.1579	1301.0954	-1.5273	1.1367	-0.18555	-48.936	46.657	544.548	-0.66602	0.29053	-0.11328	177.913	-134.68	1304.88	-2.5562	1.8813	0.12109	NaN	NaN	NaN	NaN	NaN	NaN
2.466	-47.666	-29.707	1289.8467	-1.4922	1.0957	-0.18652	-83.034	58.4405	681.08	-0.87891	0.35938	-0.1416	134.84	-134.355	1332.96222	-2.1973	1.7539	0.18799	NaN	NaN	NaN	NaN	NaN	NaN
2.468	-24.133	-15.7229	1274.3421	-1.4766	1.084	-0.18457	-61.5916	-3.896	796.632	-0.99023	0.40918	-0.16016	97.641	-190.391	1374.471	-2.0195	1.6816	0.21387	NaN	NaN	NaN	NaN	NaN	NaN
2.47	-9.243	-15.4752	1279.9168	-1.4404	1.0488	-0.18604	-1.272	-42.988	877.9655	-1.228	0.52393	-0.18311	101.68	-198.717	1337.091	-1.7246	1.5371	0.23877	NaN	NaN	NaN	NaN	NaN	NaN
2.472	16.272	-9.45906	1271.7482	-1.4146	1.0308	-0.17993	-49.382	-30.163	937.1245	-1.4624	0.65283	-0.19385	108.863	-264.087	1323.0956	-1.5701	1.4485	0.24585	NaN	NaN	NaN	NaN	NaN	NaN
2.474	6.653	-6.4903	1271.6936	-1.3906	1.0137	-0.18018	-54.799	-11.606	1008.029	-1.5781	0.71387	-0.20117	135.367	-301.421	1337.08	-1.4473	1.3594	0.25146	NaN	NaN	NaN	NaN	NaN	NaN
2.476	7.488	-5.687	1251.9807	-1.3594	0.99219	-0.16992	-6.824	5.595	1024.324	-1.7676	0.84766	-0.19238	117.301	-348.7556	1382.16727	-1.2925	1.2271	0.24951	NaN	NaN	NaN	NaN	NaN	NaN
2.478	-21.723	0.141999999999999	1229.9249	-1.3418	0.98047	-0.17188	-14.72	-33.698	990.306	-1.8779	0.94727	-0.17188	104.832	-345.795	1416.868	-1.2183	1.1606	0.22803	NaN	NaN	NaN	NaN	NaN	NaN
2.48	-24.571	24.0949	1221.882	-1.3159	0.95752	-0.17188	85.2764	-111.093	979.848	-1.9585	1.0513	-0.14453	97.207	-380.439	1424.238	-1.0488	1.0352	0.16846	NaN	NaN	NaN	NaN	NaN	NaN
2.482	-25.209	39.6933	1213.65	-1.2976	0.93531	-0.17041	104.597	-137.393	973.8149	-2.0215	1.1836	-0.10352	25.4612	-402.14	1459.305	-0.92163	0.94262	0.11694	NaN	NaN	NaN	NaN	NaN	NaN
2.484	-41.943	42.379	1182.1385	-1.2788	0.91846	-0.1665	79.235	-147.466	1007.962	-2.0269	1.2446	-0.085449	-63.66	-439.66	1514.2637	-0.80811	0.83838	0.05957	NaN	NaN	NaN	NaN	NaN	NaN
2.486	-19.28	29.857	1159.9952	-1.2573	0.88623	-0.16699	175.803	-128.381	995.57	-1.9839	1.3169	-0.058594	-103.7688	-353.233	1548.985	-0.69727	0.7041	-0.051758	NaN	NaN	NaN	NaN	NaN	NaN
2.488	-25.917	27.5803	1151.6119	-1.2476	0.87354	-0.1626	125.249	-119.155	934.6841	-1.9019	1.3267	-0.058105	-102.652	-302.115	1544.502	-0.66797	0.6543	-0.10156	NaN	NaN	NaN	NaN	NaN	NaN
2.49	-31.168	38.6504	1140.6779	-1.229	0.84814	-0.15771	88.488	-143.864	916.541	-1.7891	1.2988	-0.057129	-122.451	-219.486	1534.707	-0.65283	0.58838	-0.18799	NaN	NaN	NaN	NaN	NaN	NaN
2.492	-36.993	42.068	1124.3867	-1.2144	0.82569	-0.15747	153.69	-94.804	891.2743	-1.6172	1.2402	-0.055176	-126.049	-238.455	1559.935	-0.68848	0.58594	-0.22998	NaN	NaN	NaN	NaN	NaN	NaN
2.494	-30.161	53.055	1111.6298	-1.1929	0.80908	-0.1543	147.3	-55.678	885.806	-1.541	1.2129	-0.045898	-73.481	-198.634	1567.295	-0.75	0.60254	-0.26074	NaN	NaN	NaN	NaN	NaN	NaN
2.496	-36.841	52.6002	1100.129	-1.1733	0.77881	-0.15234	135.894	-43.259	934.246	-1.4219	1.1738	-0.029297	-58.985	-167.261	1550.888	-0.85938	0.66016	-0.26416	NaN	NaN	NaN	NaN	NaN	NaN
2.498	-50.041	54.4725	1082.8783	-1.1641	0.76758	-0.15039	82.489	-37.27	946.07	-1.3645	1.1726	-0.010254	-36.77475	-77.73	1592.278	-0.9165	0.70166	-0.27783	NaN	NaN	NaN	NaN	NaN	NaN
2.5	-56.62	57.2896	1065.015	-1.1479	0.74658	-0.14209	37.1693	-88.221	935.208	-1.3101	1.1772	0.0039063	-20.017	-90.326	1618.944	-1.0342	0.79492	-0.30371	NaN	NaN	NaN	NaN	NaN	NaN
2.502	-82.359	61.1128	1080.995	-1.1316	0.73169	-0.13794	64.497	-125.686	911.601	-1.2402	1.1855	0.01416	-39.171	-90.075	1632.164	-1.1364	0.86401	-0.34741	NaN	NaN	NaN	NaN	NaN	NaN
2.504	-78.0661	76.3701	1053.89	-1.1206	0.71729	-0.13232	54.065	-174.774	881.41	-1.1992	1.1855	0.01416	-20.903	-132.5642	1611.077	-1.2441	0.9375	-0.40039	NaN	NaN	NaN	NaN	NaN	NaN
2.506	-77.413	77.501	1038.143	-1.1055	0.69434	-0.13672	24.511	-256.088	923.398	-1.1069	1.186	0.012695	-49.927	-111.4298	1647.6738	-1.4043	1.0645	-0.44922	NaN	NaN	NaN	NaN	NaN	NaN
2.508	-78.446	80.872	999.96461	-1.0957	0.68457	-0.12695	57.477	-251.4235	970.452	-1.0332	1.1763	0.017334	-25.019	-144.191	1698.016	-1.5054	1.147	-0.46582	NaN	NaN	NaN	NaN	NaN	NaN
2.51	-60.1052	83.0879	990.4594	-1.0898	0.67383	-0.11719	15.004	-249.9719	970.6864	-0.96289	1.1641	0.0073242	-45.1633	-148.28646	1778.418	-1.7617	1.3438	-0.46436	NaN	NaN	NaN	NaN	NaN	NaN
2.512	-26.1673	90.2696	964.0186	-1.0781	0.65918	-0.11328	1.871	-276.81	1009.996	-0.87451	1.1333	0.010254	-48.346	-163.482	1799.895	-2.0093	1.5181	-0.45776	NaN	NaN	NaN	NaN	NaN	NaN
2.514	-16.065	83.5837	945.4734	-1.0698	0.64697	-0.1123	-17.0975	-265.577	1071.936	-0.83984	1.1074	0.018066	2.93400000000001	-127.949	1815.8883	-2.2832	1.6992	-0.43945	NaN	NaN	NaN	NaN	NaN	NaN
2.516	-13.7	79.212	925.015	-1.0444	0.6333	-0.10645	-64.3297	-313.531	1145.6081	-0.78516	1.0488	-0.0024414	89.2322	-116.638	1806.9908	-2.6875	1.9434	-0.41211	NaN	NaN	NaN	NaN	NaN	NaN
2.518	25.056	86.201	932.4118	-1.0308	0.62354	-0.104	-29.634	-281.963	1197.795	-0.76855	1.0073	-0.036377	80.6953	-65.717	1842.912	-2.8789	2.0645	-0.40332	NaN	NaN	NaN	NaN	NaN	NaN
2.52	21.142	90.367	910.991	-1.0034	0.60205	-0.10547	-67.295	-210.658	1210.594	-0.76514	0.96924	-0.074219	65.5452	-56.852	1826.974	-3.125	2.2559	-0.3418	NaN	NaN	NaN	NaN	NaN	NaN
2.522	14.824	99.49597	882.331	-0.9668	0.58203	-0.1001	-126.402	-195.7559	1261.01	-0.78564	0.93994	-0.12549	59.5594	-32.479	1792.712	-3.0605	2.2724	-0.19775	NaN	NaN	NaN	NaN	NaN	NaN
2.524	18.833	99.564	873.006	-0.94775	0.57275	-0.10059	-90.729	-144.661	1294.171	-0.80566	0.93652	-0.14063	62.4576	-43.4962	1740.5858	-3.2012	2.3418	-0.30176	NaN	NaN	NaN	NaN	NaN	NaN
2.526	40.6975	115.856	847.912	-0.90234	0.54883	-0.1001	-99.032	-140.837	1277.6733	-0.88232	0.93994	-0.17627	26.107	-49.852	1730.6088	-3.127	2.4414	-0.44922	NaN	NaN	NaN	NaN	NaN	NaN
2.528	20.6078	118.752	838.5636	-0.87476	0.53052	-0.097656	-43.687	-163.409	1336.78	-0.96386	0.96045	-0.19092	36.045	-48.8827	1740.014	-2.9243	2.4214	-0.41284	NaN	NaN	NaN	NaN	NaN	NaN
2.53	4.201	109.962	815.6108	-0.84766	0.50586	-0.10205	-3.56653	-135.323	1359.048	-1.0562	0.99951	-0.20752	17.835	-15.3595	1715.9152	-2.7437	2.3306	-0.3374	NaN	NaN	NaN	NaN	NaN	NaN
2.532	35.1495	95.8778	785.537	-0.81396	0.479	-0.099609	-7.059	-194.0651	1407.302	-1.1826	1.0566	-0.22461	-9.04	39.222	1672.0586	-2.5762	2.1738	-0.25781	NaN	NaN	NaN	NaN	NaN	NaN
2.534	46.2962	90.536	757.2789	-0.79688	0.46094	-0.09668	16.886862	-191.448	1439.404	-1.2437	1.0972	-0.23535	-69.773	68.1038	1670.02	-2.5098	2.1191	-0.24268	NaN	NaN	NaN	NaN	NaN	NaN
2.536	39.9621	98.727	732.3332	-0.76953	0.43359	-0.095703	1.9221	-164.096	1437.5644	-1.3691	1.1758	-0.24707	-73.552	94.683	1692.769	-2.3789	2.0352	-0.23535	NaN	NaN	NaN	NaN	NaN	NaN
2.538	28.5232	98.923	698.0924	-0.74292	0.41382	-0.094483	26.5088	-195.363	1480.779	-1.4668	1.2334	-0.26221	-87.2468	59.449	1675.538	-2.2871	1.9424	-0.23974	NaN	NaN	NaN	NaN	NaN	NaN
2.54	47.5716	105.447	703.4598	-0.7207	0.39355	-0.094238	92.718	-154.726	1514.185	-1.5698	1.2993	-0.28076	-58.396	65.0311	1636.203	-2.1973	1.8125	-0.22461	NaN	NaN	NaN	NaN	NaN	NaN
2.542	29.07091	125.3111	682.6001	-0.69141	0.37109	-0.088867	42.334	-141.806	1525.705	-1.7227	1.3867	-0.29785	-98.3705	26.445	1633.269	-2.1211	1.6426	-0.19336	NaN	NaN	NaN	NaN	NaN	NaN
2.544	9.806	118.67089	663.8291	-0.68311	0.36523	-0.087402	46.203	-151.25	1588.565	-1.8042	1.436	-0.29834	-112.448	50.216	1618.586	-2.084	1.5781	-0.17725	NaN	NaN	NaN	NaN	NaN	NaN
2.546	-14.644	114.3876	655.4401	-0.65186	0.34033	-0.084961	98.303	-111.375	1613.629	-2.0034	1.5552	-0.28223	-111.772	29.582	1620.238	-2.0254	1.4785	-0.17285	NaN	NaN	NaN	NaN	NaN	NaN
2.548	-21.1578	115.6971	635.5296	-0.62671	0.32569	-0.083741	82.207	-156.029	1648.229	-2.1667	1.6536	-0.26684	-104.632	77.208	1578.727	-1.9805	1.4243	-0.18018	NaN	NaN	NaN	NaN	NaN	NaN
2.55	-31.327	122.587	604.7142	-0.59766	0.31055	-0.081055	112.444	-154.248	1680.62	-2.3145	1.7637	-0.24561	-96.019	66.247	1556.6029	-1.9492	1.3691	-0.18262	NaN	NaN	NaN	NaN	NaN	NaN
2.552	-57.667	121.443	564.064	-0.55811	0.2876	-0.07959	104.386	-123.7658	1613.8819	-2.3882	1.8794	-0.14795	-51.6092	129.908	1541.058	-1.9214	1.3188	-0.18506	NaN	NaN	NaN	NaN	NaN	NaN
2.554	-54.357	116.6951	535.096	-0.53662	0.27539	-0.075684	89.587	-134.309	1573.751	-2.5781	1.9375	-0.21289	-48.2079	101.0502	1538.342	-1.9058	1.3013	-0.18213	NaN	NaN	NaN	NaN	NaN	NaN
2.556	-40.1231	109.44497	523.1559	-0.49805	0.25	-0.072754	92.794	-78.2731	1560.587	-2.7476	2.1079	-0.28564	-74.9183	165.265	1497.687	-1.8882	1.2681	-0.18311	NaN	NaN	NaN	NaN	NaN	NaN
2.558	-32.65825	111.1212	490.6632	-0.46631	0.23194	-0.077393	52.9988	-57.2161	1567.177	-2.7507	2.1448	-0.26635	-46.9498	154.612	1462.663	-1.8664	1.2482	-0.1792	NaN	NaN	NaN	NaN	NaN	NaN
2.56	-35.7603	93.989	492.44418	-0.43701	0.21484	-0.079102	43.228	-84.45	1597.011	-2.7261	2.1353	-0.22754	-20.0663	221.874	1419.8216	-1.8262	1.2285	-0.17676	NaN	NaN	NaN	NaN	NaN	NaN
2.562	-29.6914	105.243	472.616	-0.40381	0.18945	-0.083984	35.3598	-43.0844	1597.3495	-2.6304	2.0962	-0.19336	-8.7364	173.908	1414.052	-1.7495	1.188	-0.16357	NaN	NaN	NaN	NaN	NaN	NaN
2.564	-3.842	107.988	455.25929	-0.38525	0.18018	-0.078613	-26.909	-72.132	1563.825	-2.5601	2.0649	-0.18213	7.8569	253.54	1391.219	-1.709	1.1719	-0.15674	NaN	NaN	NaN	NaN	NaN	NaN
2.566	-18.7646	122.706	430.3139	-0.34912	0.15723	-0.084961	-33.752	-38.4685	1596.889	-2.4023	1.9668	-0.17236	55.971	217.327	1331.6937	-1.6343	1.1343	-0.14893	NaN	NaN	NaN	NaN	NaN	NaN
2.568	-10.213	119.94477	401.1511	-0.32666	0.14234	-0.086425	-48.6838	21.288	1575.811	-2.292	1.8828	-0.17041	87.98	310.156	1273.406	-1.5849	1.1064	-0.14087	NaN	NaN	NaN	NaN	NaN	NaN
2.57	-0.67	104.2113	396.8088	-0.30518	0.12842	-0.092285	-92.959	9.477	1593.6696	-2.189	1.7896	-0.15186	96.208	267.324	1252.9268	-1.5254	1.082	-0.13672	NaN	NaN	NaN	NaN	NaN	NaN
2.572	16.6336	98.8	383.4922	-0.27002	0.11523	-0.088867	-77.4028	38.9578	1611.9087	-2.0796	1.6704	-0.11914	104.152	309.493	1253.2449	-1.4497	1.0493	-0.12354	NaN	NaN	NaN	NaN	NaN	NaN
2.574	-0.923	109.891	346.6365	-0.25586	0.1084	-0.091797	-113.602	7.75803	1599.466	-2.0356	1.6138	-0.10742	123.728	220.4222	1237.5802	-1.4116	1.0327	-0.125	NaN	NaN	NaN	NaN	NaN	NaN
2.576	7.591	110.862	322.5776	-0.22754	0.096191	-0.095703	-99.78	-35.458	1622.6714	-1.9668	1.5195	-0.10547	124.086	265.288	1177.2287	-1.3418	1.002	-0.11865	NaN	NaN	NaN	NaN	NaN	NaN
2.578	47.335	106.682	315.95753	-0.20606	0.089111	-0.093505	-85.149	5.232	1613.56868	-1.9126	1.4643	-0.11084	114.069	179.5223	1149.4708	-1.2891	0.97364	-0.1128	NaN	NaN	NaN	NaN	NaN	NaN
2.58	44.7449	96.8627	297.5916	-0.18262	0.087891	-0.099121	-127.455	-4.374	1602.8277	-1.8594	1.4102	-0.11523	101.568	246.455	1127.27	-1.2319	0.93799	-0.10986	NaN	NaN	NaN	NaN	NaN	NaN
2.582	47.702	98.49284	268.3886	-0.15918	0.078613	-0.095703	-71.99821	16.868	1585.0603	-1.7847	1.3501	-0.1167	77.748	203.518	1093.255	-1.1465	0.87305	-0.10791	NaN	NaN	NaN	NaN	NaN	NaN
2.584	70.068	81.3726	245.4381	-0.14404	0.07373	-0.09375	-99.649	38.06	1558.412	-1.7573	1.3208	-0.12891	33.699	293.179	1013.054	-1.1035	0.83008	-0.10449	NaN	NaN	NaN	NaN	NaN	NaN
2.586	80.814	75.6488	247.6465	-0.12256	0.069824	-0.09082	-116.627	-5.561	1562.2818	-1.6973	1.2598	-0.13574	54.264	219.3968	959.1295	-1.0059	0.75586	-0.10449	NaN	NaN	NaN	NaN	NaN	NaN
2.588	59.088	78.60756	228.1754	-0.10425	0.064209	-0.088135	-57.091	35.8817	1587.27	-1.6646	1.2271	-0.13477	50.718	264.4639	919.697	-0.93652	0.69043	-0.10693	NaN	NaN	NaN	NaN	NaN	NaN
2.59	37.2996	84.11	210.70407	-0.089355	0.059082	-0.083984	-56.9173	78.031	1565.453	-1.6348	1.1953	-0.13867	65.748	191.833	922.94	-0.87012	0.62695	-0.11182	NaN	NaN	NaN	NaN	NaN	NaN
2.592	38.4976	78.265	211.235	-0.063965	0.047852	-0.083496	-25.895	103.901	1553.687	-1.5938	1.1582	-0.13965	41.8572	276.4523	852.182	-0.79297	0.5459	-0.10107	NaN	NaN	NaN	NaN	NaN	NaN
2.594	32.0705	81.823	208.2858	-0.051758	0.041992	-0.084473	2.006	166.721	1541.30663	-1.5698	1.1353	-0.14355	67.282	231.036	802.754	-0.75195	0.50684	-0.10742	NaN	NaN	NaN	NaN	NaN	NaN
2.596	16.8207	82.313	194.1039	-0.032715	0.025879	-0.077637	-19.985	140.569	1504.9944	-1.5298	1.106	-0.14209	23.5378	287.2892	744.8429	-0.68018	0.43311	-0.10596	NaN	NaN	NaN	NaN	NaN	NaN
2.598	6.8568	74.534	179.9884	-0.018311	0.016602	-0.074707	32.144	116.037	1481.54	-1.4958	1.073	-0.14624	23.3734	196.322	702.738	-0.62695	0.38379	-0.1018	NaN	NaN	NaN	NaN	NaN	NaN
2.6	0.264000000000001	61.64	170.5596	-0.0053711	0.00097656	-0.07373	35.338	127.684	1445.526	-1.4604	1.0513	-0.15088	-8.0329	251.008	640.755	-0.5752	0.33789	-0.10498	NaN	NaN	NaN	NaN	NaN	NaN
2.602	-10.5029	63.3531	159.06818	0.01123	-0.01123	-0.07373	26.818	92.9088	1455.589	-1.4224	1.0161	-0.15625	1.1852	202.0432	576.8231	-0.50537	0.28564	-0.10303	NaN	NaN	NaN	NaN	NaN	NaN
2.604	-9.945	59.8057	141.3255	0.018555	-0.019043	-0.069336	76.313	121.0642	1449.671	-1.4019	0.99854	-0.15479	-42.7305	260.917	511.008	-0.46777	0.25977	-0.10547	NaN	NaN	NaN	NaN	NaN	NaN
2.606	-9.568	47.6888	125.4272	0.029785	-0.033203	-0.06543	57.185	138.1014	1398.21	-1.375	0.97266	-0.16016	-56.113	187.8213	476.425	-0.39453	0.20605	-0.10742	NaN	NaN	NaN	NaN	NaN	NaN
2.608	-9.1737	44.716	122.9535	0.038086	-0.041015	-0.061768	57.3072	121.58	1362.3912	-1.3491	0.94775	-0.16016	-75.428	224.595	422.772	-0.33398	0.16553	-0.11133	NaN	NaN	NaN	NaN	NaN	NaN
2.61	-6.2903	35.147	119.7505	0.04248	-0.046387	-0.060547	87.697	150.10877	1345.765	-1.3354	0.93799	-0.15723	-2.3194	181.29	377.3393	-0.27783	0.12598	-0.11182	NaN	NaN	NaN	NaN	NaN	NaN
2.612	-45.484	37.854	111.54838	0.044922	-0.04834	-0.05957	25.472	138.738	1342.4226	-1.3027	0.91406	-0.16162	6.6063	238.282	342.1331	-0.20117	0.068359	-0.11719	NaN	NaN	NaN	NaN	NaN	NaN
2.614	-28.10615	47.24	114.1848	0.045898	-0.050781	-0.061035	44.6644	149.0045	1348.547	-1.2827	0.90186	-0.15918	30.8991	181.759	320.3204	-0.16309	0.044434	-0.1167	NaN	NaN	NaN	NaN	NaN	NaN
2.616	-30.4286	54.2929	115.0875	0.044434	-0.048828	-0.049805	12.2189	182.742	1306.217	-1.2578	0.88477	-0.15479	43.5939	202.087	317.2112	-0.085938	-0.01416	-0.12207	NaN	NaN	NaN	NaN	NaN	NaN
2.618	-10.5134	54.998	104.743	0.042969	-0.045655	-0.050293	-15.6318	154.6032	1271.244	-1.2241	0.86572	-0.15674	53.571	160.533	265.841	-0.03711	-0.058594	-0.125	NaN	NaN	NaN	NaN	NaN	NaN
2.62	-36.3304	48.565	88.4194	0.036133	-0.046875	-0.044434	26.0018	157.3369	1251.897	-1.2026	0.85205	-0.15576	37.858	191.37869	195.874	0.0073242	-0.10205	-0.12451	NaN	NaN	NaN	NaN	NaN	NaN
2.622	-8.63	50.317	74.7301	0.03418	-0.040527	-0.035156	-32.3116	173.3845	1208.7817	-1.167	0.83203	-0.1582	66.43	162.447	152.626	0.058105	-0.15332	-0.12695	NaN	NaN	NaN	NaN	NaN	NaN
2.624	1.676	35.655	78.3478	0.035645	-0.037109	-0.03125	-31.5575	164.348	1180.387	-1.1294	0.81763	-0.15967	42.1508	170.948	144.437	0.075684	-0.1792	-0.12939	NaN	NaN	NaN	NaN	NaN	NaN
2.626	-13.441	46.9915	82.639	0.030273	-0.033691	-0.030273	-6.8344	200.7632	1151.935	-1.0913	0.79932	-0.16113	46.752	137.404	117.411	0.096191	-0.22217	-0.12842	NaN	NaN	NaN	NaN	NaN	NaN
2.628	17.69	39.7219	77.387	0.034424	-0.031494	-0.026367	-40.187	201.8645	1097.566	-1.0386	0.77686	-0.16504	26.5034	140.598	96.522	0.099612	-0.25049	-0.13428	NaN	NaN	NaN	NaN	NaN	NaN
2.63	32.77101	26.4076	66.221	0.037598	-0.040039	-0.029297	-29.503	184.5288	1088.7624	-1.0078	0.76172	-0.16406	37.917	110.549	80.883	0.10205	-0.27197	-0.13525	NaN	NaN	NaN	NaN	NaN	NaN
2.632	49.333	25.129	58.6899	0.041992	-0.037598	-0.018066	-11.0302	206.089	1056.9705	-0.95264	0.73096	-0.16699	63.845	113.597	84.6253	0.086426	-0.28662	-0.14551	NaN	NaN	NaN	NaN	NaN	NaN
2.634	34.9864	33.0305	43.3159	0.04541	-0.040527	-0.02002	-38.1171	184.104	1005.8586	-0.90454	0.70679	-0.17554	86.23	86.418	81.067	0.073242	-0.29248	-0.14355	NaN	NaN	NaN	NaN	NaN	NaN
2.636	35.8407	32.31016	43.1522	0.054688	-0.053711	-0.019531	-29.151	186.5533	976.4819	-0.85938	0.67969	-0.17285	50.8689	82.983	67.868	0.041504	-0.28467	-0.15234	NaN	NaN	NaN	NaN	NaN	NaN
2.638	50.7262	20.7022	40.116	0.05664	-0.0625	-0.022461	-64.643	207.124	930.1315	-0.79248	0.63818	-0.17822	47.1251	72.268	23.798	0.011963	-0.27343	-0.15259	NaN	NaN	NaN	NaN	NaN	NaN
2.64	43.1842	26.2277	35.768	0.057617	-0.074707	-0.023438	-35.729	196.821	930.228	-0.75977	0.61914	-0.17725	55.7382	57.1697	29.63	-0.019531	-0.25488	-0.15674	NaN	NaN	NaN	NaN	NaN	NaN
2.642	29.6067	23.8404	39.415	0.059082	-0.087891	-0.020508	13.9999	237.3327	897.7392	-0.68945	0.57617	-0.18164	29.6654	35.493	27.6301	-0.05957	-0.22217	-0.16992	NaN	NaN	NaN	NaN	NaN	NaN
2.644	32.6901	5.279	33.4645	0.057129	-0.09082	-0.021484	-1.3043	238.5821	853.8916	-0.63843	0.54419	-0.18017	-8.687	20.962	54.858	-0.080078	-0.1958	-0.16016	NaN	NaN	NaN	NaN	NaN	NaN
2.646	30.3703	5.54472	42.3679	0.055664	-0.10205	-0.02832	57.875	218.5525	824.711	-0.58398	0.50879	-0.17725	-14.281	29.067	54.452	-0.11914	-0.16016	-0.17822	NaN	NaN	NaN	NaN	NaN	NaN
2.648	0.328000000000001	23.75528	28.6332	0.05249	-0.10449	-0.026123	54.464	226.427	777.8171	-0.521	0.46729	-0.17676	-66.0102	23.0492	50.4565	-0.15088	-0.13086	-0.18652	NaN	NaN	NaN	NaN	NaN	NaN
2.65	17.5993	34.0719	19.1403	0.052734	-0.11084	-0.029297	51.813	188.3688	729.9677	-0.49023	0.44336	-0.17188	-54.8776	14.07	26.983	-0.1792	-0.094238	-0.18896	NaN	NaN	NaN	NaN	NaN	NaN
2.652	6.642	21.81549	17.42418	0.053711	-0.10693	-0.033203	108.675	187.2889	686.913	-0.43018	0.3999	-0.16699	-54.7093	-26.8792	44.969	-0.21191	-0.057129	-0.19873	NaN	NaN	NaN	NaN	NaN	NaN
2.654	-3.059	15.4876	13.7184	0.050781	-0.1123	-0.035156	72.376	193.3572	639.9795	-0.38281	0.36914	-0.16748	-64.6343	-5.06	17.5455	-0.23047	-0.044434	-0.20361	NaN	NaN	NaN	NaN	NaN	NaN
2.656	-5.262	10.032	7.3624	0.047363	-0.11865	-0.042969	92.378	139.878	611.9288	-0.33936	0.3374	-0.16309	-55.23337	-37.8895	10.3921	-0.26563	-0.015137	-0.1958	NaN	NaN	NaN	NaN	NaN	NaN
2.658	-5.801	8.9327	7.0751	0.043945	-0.11865	-0.044434	104.696	162.1088	583.594931	-0.27588	0.29541	-0.15527	-68.485	-2.325	5.3393	-0.30859	0.0087891	-0.18604	NaN	NaN	NaN	NaN	NaN	NaN
2.66	-18.7038	-5.7187	18.0679	0.043945	-0.11133	-0.047852	65.598	196.483	511.4705	-0.24951	0.27588	-0.15186	-49.6459	-47.4741	39.5225	-0.33203	0.018555	-0.18262	NaN	NaN	NaN	NaN	NaN	NaN
2.662	-40.0965	3.2441	19.56066	0.041016	-0.11133	-0.049316	92.118	195.2971	488.2499	-0.19141	0.23047	-0.14258	-59.3933	6.023	1.966	-0.38623	0.051758	-0.17334	NaN	NaN	NaN	NaN	NaN	NaN
2.664	-21.3442	6.8092	15.5631	0.039307	-0.10742	-0.051025	94.52	230.292	449.006	-0.15039	0.20459	-0.13575	-32.869	-6.468	19.8714	-0.43213	0.072998	-0.16236	NaN	NaN	NaN	NaN	NaN	NaN
2.666	-45.14517	5.5813	9.42924	0.038574	-0.1001	-0.056152	46.153	193.611	418.71	-0.11475	0.17041	-0.13037	-40.946	61.7394	-12.5141	-0.47656	0.093262	-0.14844	NaN	NaN	NaN	NaN	NaN	NaN
2.668	-33.7317	4.48458	6.7757	0.034668	-0.092773	-0.060059	89.902	163.517	396.1137	-0.07373	0.12646	-0.12256	-24.872	12.5396	7.9538	-0.52344	0.125	-0.12402	NaN	NaN	NaN	NaN	NaN	NaN
2.67	-27.8021	-1.53178	12.58417	0.029785	-0.088867	-0.062988	53.133	188.727	335.524	-0.057617	0.1123	-0.12305	-49.3648	24.9444	1.651	-0.54443	0.15186	-0.11182	NaN	NaN	NaN	NaN	NaN	NaN
2.672	-32.3666	10.9237	5.7933	0.031738	-0.07373	-0.074219	44.105	142.494	314.4045	-0.031738	0.068359	-0.11719	-44.5649	-27.22612	-4.2619	-0.56299	0.17871	-0.092285	NaN	NaN	NaN	NaN	NaN	NaN
2.674	-6.2913	7.4145	8.8891	0.027588	-0.068115	-0.071289	53.765	143.6037	305.3954	-0.01416	0.043213	-0.10864	-9.78	22.3509	-39.255	-0.55932	0.19434	-0.074951	NaN	NaN	NaN	NaN	NaN	NaN
2.676	-17.8758	2.5314	5.337	0.024414	-0.055664	-0.078613	-2.1549	142.4501	262.511	-0.010742	0.017578	-0.10498	33.4635	-13.6123	-12.616	-0.54492	0.20898	-0.058594	NaN	NaN	NaN	NaN	NaN	NaN
2.678	1.378	7.5918	7.7637	0.020996	-0.043945	-0.083008	-3.3251	120.6863	230.0317	-0.010742	-0.018066	-0.10059	13.91	33.729	-25.98952	-0.50293	0.22021	-0.038086	NaN	NaN	NaN	NaN	NaN	NaN
2.68	20.012	10.1783	21.86968	0.017578	-0.037109	-0.093262	-9.5513	160.477	190.241	-0.010742	-0.027832	-0.098633	14.053	8.184	-7.073	-0.47852	0.21875	-0.027832	NaN	NaN	NaN	NaN	NaN	NaN
2.682	28.0014	-8.1948	50.2189	0.01416	-0.029785	-0.095215	-52.655	142.5717	173.283	-0.023926	-0.047852	-0.094727	40.073	71.516	-21.0549	-0.41016	0.20703	-0.016113	NaN	NaN	NaN	NaN	NaN	NaN
2.684	8.319	-32.1296	59.246	0.0075682	-0.020508	-0.10547	-34.483	104.9829	184.296	-0.032715	-0.063477	-0.093262	60.457	27.3204	7.1098	-0.34888	0.19433	-0.010498	NaN	NaN	NaN	NaN	NaN	NaN
2.686	25.7657	-26.831	84.9016	-0.0078125	-0.015137	-0.11182	-61.238	117.262168	156.4042	-0.04541	-0.065918	-0.088867	62.2665	57.286	27.086	-0.2832	0.17432	-0.0058594	NaN	NaN	NaN	NaN	NaN	NaN
2.688	49.339	-9.509	113.1508	-0.047363	0.0024414	-0.11963	-52.341	49.336	150.211	-0.055664	-0.07373	-0.09082	63.921	3.3584	33.3045	-0.19287	0.13037	-0.0068359	NaN	NaN	NaN	NaN	NaN	NaN
2.69	23.2524	-8.769	159.2075	-0.073242	0.0043945	-0.12109	-31.811	50.721	148.852	-0.062988	-0.076172	-0.088867	23.388	42.998	-4.4718	-0.14893	0.10645	-0.0058594	NaN	NaN	NaN	NaN	NaN	NaN
2.692	46.324	-6.954	224.576	-0.14307	0.021973	-0.13721	-36.8416	78.944	116.9781	-0.071289	-0.083496	-0.083984	12.959	21.92	-6.637	-0.067383	0.058594	-0.0029297	NaN	NaN	NaN	NaN	NaN	NaN
2.694	94.703	-7.9713	259.654	-0.20874	0.035156	-0.1477	8.064	54.652	113.986	-0.073487	-0.077637	-0.081055	17.315	67.767	-2.433	-0.015625	0.025146	-0.0021973	NaN	NaN	NaN	NaN	NaN	NaN
2.696	125.584	0.78252	353.82	-0.28809	0.051758	-0.1582	1.3015	117.711	66.2638	-0.074707	-0.082031	-0.081055	-0.789	35.052	43.9952	0.033691	-0.0029297	-0.0058594	NaN	NaN	NaN	NaN	NaN	NaN
2.698	112.137	13.6465	482.513	-0.41992	0.082031	-0.17188	-18.8592	94.7488	43.0739	-0.080078	-0.071289	-0.075195	-7.757	65.434	41.1462	0.10059	-0.04541	-0.018066	NaN	NaN	NaN	NaN	NaN	NaN
2.7	110.669	8.5465	590.7889	-0.50244	0.10449	-0.17432	32.363	33.3731	57.7596	-0.081055	-0.071289	-0.074219	-13.2894	31.187768	36.65637	0.13867	-0.065918	-0.020508	NaN	NaN	NaN	NaN	NaN	NaN
2.702	76.643	-7.1206	648.7653	-0.69629	0.16016	-0.18848	6.496438	34.25	46.161	-0.092285	-0.065918	-0.064453	-25.789	57.757	33.8001	0.2085	-0.1084	-0.02832	NaN	NaN	NaN	NaN	NaN	NaN
2.704	37.3882	-17.922	701.4227	-0.86279	0.22241	-0.19482	28.6045	-20.9867	47.1199	-0.10254	-0.066407	-0.061767	-17.8336	5.984	40.916	0.25684	-0.13916	-0.031983	NaN	NaN	NaN	NaN	NaN	NaN
2.706	18.139	-36.359	773.109	-1.0542	0.30029	-0.19482	75.157	2.28157	42.4615	-0.11475	-0.066895	-0.056641	-66.4281	21.423	43.859	0.30273	-0.16797	-0.04248	NaN	NaN	NaN	NaN	NaN	NaN
2.708	-36.242	-5.99299999999999	837.578	-1.3379	0.42188	-0.19775	31.5952	21.5021	11.85899	-0.13477	-0.061523	-0.049805	-51.3249	-6.982	25.641	0.354	-0.20947	-0.042969	NaN	NaN	NaN	NaN	NaN	NaN
2.71	-52.576	28.44227	887.101	-1.4893	0.49414	-0.19775	57.13	-9.3617	8.1406	-0.14307	-0.054199	-0.046387	-45.475	0.481000000000002	2.179	0.37354	-0.22363	-0.045898	NaN	NaN	NaN	NaN	NaN	NaN
2.712	-103.727	20.1273	916.466	-1.7813	0.64258	-0.19775	57.805	34.8321	-8.3129	-0.16895	-0.041504	-0.036133	-39.6449	-22.3784	33.7358	0.38721	-0.25537	-0.051758	NaN	NaN	NaN	NaN	NaN	NaN
2.714	-131.4373	-25.035	942.4355	-1.9809	0.76806	-0.20654	46.7479	26.1702	-15.5043	-0.17505	-0.030517	-0.031006	-72.5649	-4.203	44.026	0.38842	-0.27441	-0.051758	NaN	NaN	NaN	NaN	NaN	NaN
2.716	-127.4402	-65.978	960.9136	-2.1523	0.90039	-0.2124	110.443	-16.5632	21.7094	-0.18555	-0.014648	-0.024414	-68.9574	11.841	37.429	0.38477	-0.28613	-0.052246	NaN	NaN	NaN	NaN	NaN	NaN
2.718	-101.5757	-68.2748	975.568	-2.3081	1.0903	-0.22803	66.655	21.7563	25.4551	-0.18652	0.0029297	-0.01709	-40.376	37.8976	38.394	0.36523	-0.2915	-0.059082	NaN	NaN	NaN	NaN	NaN	NaN
2.72	-84.76	-52.632	986.283	-2.3472	1.186	-0.23486	58.141	-28.0124	25.573	-0.18213	0.016113	-0.01123	-57.283	9.341	13.672	0.35547	-0.29492	-0.046875	NaN	NaN	NaN	NaN	NaN	NaN
2.722	-91.9263	-24.711	993.132	-2.3452	1.3735	-0.21826	69.987	-20.9535	5.3311	-0.15771	0.033691	-0.0043945	-54.19	-18.01409	26.685	0.33301	-0.28662	-0.054688	NaN	NaN	NaN	NaN	NaN	NaN
2.724	-88.392	13.217	997.715	-2.284	1.4973	-0.18335	7.0545	-2.9259	-25.9039	-0.14136	0.040283	-0.00097657	-31.224	-42.15745	26.794	0.31372	-0.28003	-0.053222	NaN	NaN	NaN	NaN	NaN	NaN
2.726	-124.686	20.744	962.837	-2.2085	1.5806	-0.16162	35.1459	-38.011	-12.1818	-0.11182	0.044922	0.0058594	-15.089	-26.1016	-11.4557	0.29297	-0.2666	-0.058105	NaN	NaN	NaN	NaN	NaN	NaN
2.728	-132.433	-17.618	961.791	-2.062	1.5728	-0.19678	8.931	15.1442	-9.8644	-0.075684	0.046875	0.012695	21.23	2.656	-29.176	0.28076	-0.25195	-0.055176	NaN	NaN	NaN	NaN	NaN	NaN
2.73	-121.0228	-46.6058	975.235	-1.9604	1.5259	-0.229	-17.6196	20.4151	-15.2178	-0.062012	0.041992	0.015625	25.1707	-3.183	-25.236	0.27441	-0.24951	-0.053223	NaN	NaN	NaN	NaN	NaN	NaN
2.732	-112.4375	-52.4527	993.785	-1.7061	1.3535	-0.27783	-11.3778	-17.8674	-12.0086	-0.022949	0.036133	0.019531	9.835	23.091689	-30.317	0.26514	-0.23291	-0.056641	NaN	NaN	NaN	NaN	NaN	NaN
2.734	-116.36	-48.305	985.91	-1.5261	1.1897	-0.29809	-43.0641	26.2847	-12.9888	0.0029297	0.023925	0.022705	33.381	26.167	-0.827999999999999	0.25635	-0.22217	-0.054199	NaN	NaN	NaN	NaN	NaN	NaN
2.736	-126.02	-67.654	956.6638	-1.3579	1.019	-0.3042	-36.574	-19.678	10.0198	0.027832	0.0058594	0.029785	69.95	46.1781	-15.181	0.24951	-0.21582	-0.056641	NaN	NaN	NaN	NaN	NaN	NaN
2.738	-83.007	-98.1334	939.2894	-1.1777	0.80664	-0.30566	-27.6946	-2.029	14.0672	0.052246	-0.010742	0.036133	54.7914	15.4084	10.9216	0.24561	-0.20703	-0.061035	NaN	NaN	NaN	NaN	NaN	NaN
2.74	-24.4663	-120.854	953.7781	-1.1064	0.72656	-0.31201	-56.109	36.7643	-16.4816	0.064941	-0.024902	0.039551	30.541	21.571	20.071	0.24365	-0.20361	-0.0625	NaN	NaN	NaN	NaN	NaN	NaN
2.742	15.7419	-129.5	970.6323	-0.98242	0.60156	-0.33203	-43.5866	-4.7547	0.1287	0.093262	-0.055664	0.036621	5.253	-3.2963	14.5856	0.23926	-0.19385	-0.077148	NaN	NaN	NaN	NaN	NaN	NaN
2.744	13.1929	-152.938	1002.3921	-0.90698	0.54688	-0.34546	-54.089	40.721	-0.56503	0.12012	-0.079102	0.042969	7.607	40.648	-39.1313	0.23364	-0.18579	-0.077637	NaN	NaN	NaN	NaN	NaN	NaN
2.746	51.481	-158.544	1030.6035	-0.84326	0.5083	-0.35596	-49.481	26.7656	-1.149	0.13086	-0.09082	0.043945	38.6832	31.6651	-23.2273	0.21826	-0.17041	-0.082031	NaN	NaN	NaN	NaN	NaN	NaN
2.748	68.253	-162.756	1043.988	-0.77734	0.47168	-0.36133	-22.905	-10.524856	15.1166	0.15674	-0.11816	0.045898	14.659	51.025	-15.0267	0.19385	-0.14795	-0.09082	NaN	NaN	NaN	NaN	NaN	NaN
2.75	69.085	-149.6954	1038.485	-0.75195	0.44922	-0.36426	-55.623	38.944	-18.3667	0.17969	-0.13013	0.041992	-6.423	25.86554	35.7126	0.17822	-0.13477	-0.09668	NaN	NaN	NaN	NaN	NaN	NaN
2.752	99.604	-155.2262	1041.244	-0.72266	0.41943	-0.36475	-10.1004	-11.9508	-10.7631	0.19287	-0.14404	0.039551	3.984	57.0214	-7.693	0.15283	-0.104	-0.10205	NaN	NaN	NaN	NaN	NaN	NaN
2.754	99.124	-141.5036	1055.5759	-0.71265	0.40552	-0.36084	11.3153	-5.5851	9.041	0.2168	-0.15723	0.036133	3.537	25.9589	11.692	0.13575	-0.07251	-0.10376	NaN	NaN	NaN	NaN	NaN	NaN
2.756	76.764	-130.57	1071.989	-0.70752	0.39111	-0.36768	-14.3793	30.7245	3.93186	0.22266	-0.16504	0.036133	-28.727	50.973	24.3618	0.11914	-0.044434	-0.10547	NaN	NaN	NaN	NaN	NaN	NaN
2.758	34.89	-115.74	1101.3176	-0.72021	0.37646	-0.3667	42.7979	-15.6799	15.1101	0.23926	-0.17676	0.033203	-15.822	12.2866	59.206	0.091309	-0.0083008	-0.10449	NaN	NaN	NaN	NaN	NaN	NaN
2.76	74.562	-114.164	1140.577	-0.72998	0.37061	-0.36963	40.52109	25.3371	1.5587	0.24268	-0.18335	0.033203	-51.941	45.196	26.638	0.078613	0.010254	-0.10645	NaN	NaN	NaN	NaN	NaN	NaN
2.762	101.835	-126.112	1177.742	-0.7627	0.36621	-0.37793	47.336	24.6611	-1.928	0.24658	-0.19531	0.028809	-40.5564	31.1996	9.7654	0.039551	0.035156	-0.10596	NaN	NaN	NaN	NaN	NaN	NaN
2.764	86.091	-126.014	1169.775425	-0.79663	0.37451	-0.3733	60.709	-8.0865	15.2392	0.24365	-0.19873	0.02002	-67.972487	56.606	-0.702	0.0085449	0.055908	-0.10669	NaN	NaN	NaN	NaN	NaN	NaN
2.766	65.662	-133.2511	1175.81	-0.8457	0.39063	-0.37695	53.277	55.663	-4.09322	0.24365	-0.20264	0.014648	-75.814	16.0241	50.1837	-0.024414	0.068848	-0.10889	NaN	NaN	NaN	NaN	NaN	NaN
2.768	55.974	-137.846	1186.567	-0.92236	0.4458	-0.36377	70.417	8.3275	18.2682	0.23486	-0.20947	0.0097656	-76.2749	38.857	53.342	-0.057617	0.088867	-0.11328	NaN	NaN	NaN	NaN	NaN	NaN
2.77	52.263	-130.0395	1235.5509	-0.97412	0.48096	-0.3623	89.417	0.86106	19.4271	0.23193	-0.21167	0.0043945	-48.847	13.3096	46.1546	-0.077148	0.09375	-0.11475	NaN	NaN	NaN	NaN	NaN	NaN
2.772	14.415	-126.41	1265.819	-1.0918	0.5625	-0.35254	37.1657	19.4877	5.2212	0.22754	-0.21338	-0.00097656	-37.167	31.5567	21.3832	-0.10693	0.10889	-0.11816	NaN	NaN	NaN	NaN	NaN	NaN
2.774	9.9618	-150.163	1293.814	-1.1933	0.63867	-0.34668	64.979	-33.124	21.9991	0.22559	-0.20264	-0.01416	-28.396	-24.7283	41.639	-0.12598	0.12256	-0.11719	NaN	NaN	NaN	NaN	NaN	NaN
2.776	-8.5787	-155.91	1301.4704	-1.2964	0.72705	-0.34326	40.6119	21.77481	-3.261	0.22314	-0.2002	-0.018066	-43.878	-19.5183	78.03	-0.13623	0.13281	-0.11816	NaN	NaN	NaN	NaN	NaN	NaN
2.778	-25.8641	-135.271	1320.213	-1.4336	0.85742	-0.35596	23.1419	21.0171	-4.1042	0.22949	-0.19043	-0.03125	-31.73	-64.649	121.018	-0.1543	0.14795	-0.12646	NaN	NaN	NaN	NaN	NaN	NaN
2.78	-37.302	-112.1333	1319.3876	-1.4937	0.91455	-0.37256	47.3345	-18.7917	24.5989	0.23267	-0.1814	-0.044433	-7.891	6.14	137.396	-0.15869	0.15186	-0.12988	NaN	NaN	NaN	NaN	NaN	NaN
2.782	-45.463	-94.482	1321.769	-1.5918	1.0254	-0.39307	0.25	18.347	-1.9845	0.23145	-0.17041	-0.057617	32.7989	26.57006	239.5869	-0.1543	0.15527	-0.14453	NaN	NaN	NaN	NaN	NaN	NaN
2.784	-18.8644	-99.8453	1341.477	-1.646	1.0742	-0.42138	-13.4892	-32.5873	12.3393	0.22803	-0.16064	-0.070801	2.323	54.483	341.143	-0.15992	0.15845	-0.15796	NaN	NaN	NaN	NaN	NaN	NaN
2.786	-26.888	-121.612	1340.2834	-1.6855	1.1074	-0.4502	3.139	-25.3253	15.3677	0.2251	-0.1543	-0.077148	18.5571	55.8613	504.269	-0.16406	0.16602	-0.16748	NaN	NaN	NaN	NaN	NaN	NaN
2.788	6.2226	-132.823	1330.9095	-1.75	1.1367	-0.46875	-33.8802	20.457	13.0581	0.21631	-0.15039	-0.092773	35.875	107.8376	640.219	-0.2124	0.18945	-0.17432	NaN	NaN	NaN	NaN	NaN	NaN
2.79	7.0674	-123.465	1328.824	-1.7871	1.1504	-0.4707	-25.6976	-19.3587	20.4023	0.2019	-0.14697	-0.10743	62.253	86.167	834.525	-0.27661	0.2019	-0.18994	NaN	NaN	NaN	NaN	NaN	NaN
2.792	33.491	-79.035	1343.7886	-1.8926	1.1904	-0.47559	-42.3828	28.96	15.3422	0.19434	-0.13721	-0.11377	61.0718	45.246	1037.502	-0.36475	0.22119	-0.21338	NaN	NaN	NaN	NaN	NaN	NaN
2.794	47.198	-69.254	1348.1184	-2.0195	1.252	-0.47705	-49.381	10.5377	1.1668	0.17383	-0.11719	-0.125	50.011	-39.363	1239.34	-0.52295	0.25391	-0.23584	NaN	NaN	NaN	NaN	NaN	NaN
2.796	32.3229	-64.4027	1336.0014	-2.0781	1.2852	-0.47852	-32.0243	-39.874	6.61161	0.16113	-0.10986	-0.12988	36.175	-54.23	1342.3791	-0.63135	0.27197	-0.24805	NaN	NaN	NaN	NaN	NaN	NaN
2.798	45.8507	-67.07	1330.65	-2.1729	1.3555	-0.47852	-62.032	14.636321	-5.5939	0.13916	-0.07959	-0.13525	29.8857	-44.369	1409.294	-0.88623	0.34375	-0.27734	NaN	NaN	NaN	NaN	NaN	NaN
2.8	75.882	-67.4	1363.91851	-2.2048	1.3997	-0.48925	-48.124	-33.023	3.9696	0.11914	-0.057129	-0.13916	-17.101	-41.839	1476.249	-1.1214	0.43238	-0.29663	NaN	NaN	NaN	NaN	NaN	NaN
2.802	106.638	-56.729	1386.812	-2.1851	1.4165	-0.4917	-30.0465	-17.6918	3.0502	0.097168	-0.03125	-0.14648	-71.668	-68.287	1488.975	-1.3784	0.54541	-0.30566	NaN	NaN	NaN	NaN	NaN	NaN
2.804	72.153	-52.635	1399.9548	-2.103	1.3911	-0.5083	-32.1821	26.7273	-35.4147	0.067383	-0.00097656	-0.15039	-106.711	-111.522	1471.644	-1.7637	0.73828	-0.30469	NaN	NaN	NaN	NaN	NaN	NaN
2.806	101.785	-45.589	1387.175	-2.0386	1.3618	-0.51514	1.278	-36.002	-12.22818	0.04834	0.01416	-0.14844	-113.536	-140.63	1404.186	-1.9683	0.84912	-0.29199	NaN	NaN	NaN	NaN	NaN	NaN
2.808	114.383	-48.1666	1380.357	-1.9155	1.2856	-0.51904	-3.5234	14.6228	-14.944	0.017578	0.039063	-0.16016	-149.353	-209.323	1363.238	-2.3745	1.0786	-0.2373	NaN	NaN	NaN	NaN	NaN	NaN
2.81	118.669	-64.962	1380.643	-1.8357	1.2171	-0.52856	4.653	11.85952	-2.1156	-0.0083006	0.058593	-0.17285	-172.703	-232.33	1348.283	-2.6667	1.2747	-0.19263	NaN	NaN	NaN	NaN	NaN	NaN
2.812	129.916	-60.178	1397.886	-1.7793	1.1543	-0.52734	34.1595	-17.583086	9.211	-0.027832	0.082031	-0.17822	-176.037	-245.31	1289.732	-2.9351	1.4985	-0.15576	NaN	NaN	NaN	NaN	NaN	NaN
2.814	134.001	-54.1351	1413.575	-1.7378	1.0903	-0.51709	23.2424	40.904	12.679	-0.067383	0.12109	-0.17285	-157.846	-174.587	1159.9829	-3.1772	1.8091	-0.15381	NaN	NaN	NaN	NaN	NaN	NaN
2.816	142.28	-20.423	1421.424	-1.7319	1.063	-0.51514	60.923	-36.97685	56.981	-0.098633	0.14063	-0.17627	-132.021	-137.354	1131.738	-3.209	1.9355	-0.19824	NaN	NaN	NaN	NaN	NaN	NaN
2.818	78.332	-11.337	1401.7383	-1.7402	1.0352	-0.50781	55.242	-74.6656	75.7055	-0.16992	0.17773	-0.18652	-142.043	-48.024	1109.453	-3.0151	2.0249	-0.31152	NaN	NaN	NaN	NaN	NaN	NaN
2.82	84.976	-14.976	1403.7453	-1.7566	1.0193	-0.4978	28.6874	-31.109	74.534	-0.24195	0.19849	-0.19165	-153.438	-67.964	1160.568	-2.6618	1.9006	-0.37012	NaN	NaN	NaN	NaN	NaN	NaN
2.822	77.436	-28.813	1416.6008	-1.769	1.0142	-0.48486	99.9	-73.0279	126.8805	-0.3208	0.22656	-0.20313	-147.307	-44.47	1145.614	-2.2202	1.6665	-0.43115	NaN	NaN	NaN	NaN	NaN	NaN
2.824	65.78	-17.3546	1414.68	-1.7852	1.0098	-0.47559	73.975	-10.129	179.872	-0.46338	0.27783	-0.21289	-165.037	-110.17	1156.201	-1.6582	1.2598	-0.49805	NaN	NaN	NaN	NaN	NaN	NaN
2.826	31.346	-9.0586	1408.189	-1.7832	1.0098	-0.4707	23.2081	-10.56	291.442	-0.55225	0.30908	-0.21631	-172.814	-112.218	1158.956	-1.4258	1.0801	-0.52246	NaN	NaN	NaN	NaN	NaN	NaN
2.828	7.1389	25.4342	1399.7948	-1.7788	1.0142	-0.46045	87.824	2.19	431.395	-0.77002	0.37939	-0.22119	-146.698	-201.51	1204.3301	-1.1172	0.80273	-0.57227	NaN	NaN	NaN	NaN	NaN	NaN
2.83	-2.7004	31.0875	1390.7404	-1.7664	1.0134	-0.45068	69.636	105.695	564.944	-0.98169	0.44849	-0.21899	-147.4537	-213.897	1211.722	-1.011	0.67309	-0.59302	NaN	NaN	NaN	NaN	NaN	NaN
2.832	-22.064	37.716	1367.1114	-1.7515	1.0142	-0.45459	63.658	62.738	769.54	-1.2222	0.53369	-0.21191	-107.7382	-286.7729	1267.3981	-0.96045	0.59424	-0.60205	NaN	NaN	NaN	NaN	NaN	NaN
2.834	5.5602	13.0573	1351.253	-1.728	1.0063	-0.43408	60.147	14.3226	946.13	-1.5894	0.6792	-0.20166	-52.276	-316.034	1295.761	-0.8999	0.5415	-0.61816	NaN	NaN	NaN	NaN	NaN	NaN
2.836	-3.47821	2.62	1336.9962	-1.7109	1.0039	-0.43066	14.7374	18.5664	1070.6953	-1.7871	0.76172	-0.18359	-11.583	-412.644	1349.1725	-0.8457	0.51074	-0.62158	NaN	NaN	NaN	NaN	NaN	NaN
2.838	-4.6867	4.333	1348.8487	-1.6792	0.99561	-0.41553	13.1214	-52.675	1209.67	-2.1694	0.95752	-0.16162	14.714	-424.197	1399.7788	-0.72217	0.45361	-0.61865	NaN	NaN	NaN	NaN	NaN	NaN
2.84	-27.7	8.585	1329.8452	-1.6647	0.98451	-0.40565	-10.204	1.07600000000001	1295.062	-2.4268	1.1416	-0.13818	53.7818	-429.618	1472.942	-0.63989	0.41431	-0.61499	NaN	NaN	NaN	NaN	NaN	NaN
2.842	-21.6396	10.1929	1312.8134	-1.651	0.97842	-0.40375	-62.8097	0.808	1350.348	-2.6597	1.354	-0.099121	60.892	-370.346	1503.9	-0.5752	0.3833	-0.61084	NaN	NaN	NaN	NaN	NaN	NaN
2.844	-10.3248	24.4224	1296.0098	-1.6378	0.97173	-0.39959	-100.0085	-67.401	1363.821	-2.8984	1.6621	-0.059082	46.2051	-366.918	1569.895	-0.56738	0.37256	-0.58203	NaN	NaN	NaN	NaN	NaN	NaN
2.846	-1.2188	37.2163	1279.405	-1.624	0.96474	-0.39482	-138.062	-72.85	1322.425	-2.9785	1.793	-0.063477	51.694	-333.92	1601.287	-0.60498	0.38525	-0.57031	NaN	NaN	NaN	NaN	NaN	NaN
2.848	7.5911	51.1419	1262.159	-1.6089	0.95752	-0.39014	-165.688	-186.875	1321.468	-2.998	1.9453	-0.12598	49.44	-323.2239	1592.295	-0.75195	0.4375	-0.55176	NaN	NaN	NaN	NaN	NaN	NaN
2.85	-20.8609	42.7966	1247.1056	-1.595	0.94709	-0.38275	-182.5406	-240.86	1328.728	-2.846	1.9241	-0.20874	63.4129	-256.441	1553.1317	-0.91309	0.51758	-0.54542	NaN	NaN	NaN	NaN	NaN	NaN
2.852	14.4574	53.4574	1242.658	-1.5751	0.9305	-0.3761	-169.6857	-216.549	1304.821	-2.6011	1.8306	-0.30908	68.17	-208.157	1546.6435	-1.1016	0.62305	-0.54492	NaN	NaN	NaN	NaN	NaN	NaN
2.854	41.635	57.9428	1223.2439	-1.5473	0.90799	-0.3667	-118.35	-277.64	1233.743	-2.1675	1.5845	-0.44092	69.748	-142.198	1589.671	-1.3608	0.78564	-0.54346	NaN	NaN	NaN	NaN	NaN	NaN
2.856	61.519	59.879	1211.553	-1.5131	0.87513	-0.35712	-105.6145	-203.969	1143.329	-1.9302	1.4399	-0.48584	61.222	-120.435	1593.952	-1.4844	0.88281	-0.54883	NaN	NaN	NaN	NaN	NaN	NaN
2.858	56.746	50.8613	1196.4143	-1.4858	0.84033	-0.34033	-96.72	-107.253	1099.0949	-1.5039	1.1563	-0.52881	74.1905	-105.03	1584.67	-1.6973	1.1074	-0.57031	NaN	NaN	NaN	NaN	NaN	NaN
2.86	71.286	65.8427	1156.5239	-1.4618	0.81887	-0.3252	-64.2825	-55.169	1108.02804	-1.2666	0.96778	-0.54004	48.5504	-114.046	1613.924	-1.8286	1.2837	-0.60694	NaN	NaN	NaN	NaN	NaN	NaN
2.862	92.984	80.07	1153.7589	-1.4464	0.79453	-0.32734	-98.032	33.413	1102.7169	-1.1011	0.83838	-0.56104	24.091	-135.1148	1703.7237	-1.937	1.4497	-0.6499	NaN	NaN	NaN	NaN	NaN	NaN
2.864	64.796	100.117	1138.0645	-1.4282	0.77838	-0.31793	-71.506	-27.29	1098.1019	-0.95703	0.73535	-0.60791	-7.883	-110.6985	1766.571	-2.0645	1.6074	-0.70215	NaN	NaN	NaN	NaN	NaN	NaN
2.866	75.132	83.552	1150.941	-1.4139	0.76071	-0.30994	-69.176	-86.257	1092.1015	-0.90088	0.69385	-0.63232	-37.2958	-107.23	1792.608	-2.1226	1.6567	-0.71436	NaN	NaN	NaN	NaN	NaN	NaN
2.868	74.819	68.8898	1137.362	-1.3945	0.74805	-0.29932	-65.191	-131.634	1072.54	-0.77734	0.62695	-0.65332	-66.492	-89.58704	1777.2068	-2.2598	1.7227	-0.74414	NaN	NaN	NaN	NaN	NaN	NaN
2.87	48.7866	61.8986	1105.715	-1.3704	0.73345	-0.29675	3.347	-212.426	1087.84	-0.68848	0.57813	-0.64453	-69.107	-129.452	1795.6337	-2.3708	1.7669	-0.7649	NaN	NaN	NaN	NaN	NaN	NaN
2.872	31.5001	71.9831	1070.2491	-1.3416	0.71734	-0.28521	28.1222	-220.028	1080.687	-0.61328	0.53418	-0.62988	-72.34	-141.602	1814.8738	-2.4961	1.8145	-0.7793	NaN	NaN	NaN	NaN	NaN	NaN
2.874	15.5141	93.646	1050.5363	-1.311	0.69803	-0.28212	16.7772	-261.4756	1090.916	-0.53857	0.46777	-0.63086	-69.275	-153.125	1878.82	-2.6421	1.8794	-0.79248	NaN	NaN	NaN	NaN	NaN	NaN
2.876	35.5432	103.9653	1052.889	-1.2746	0.68337	-0.27452	78.508	-327.315	1107.707	-0.51514	0.43799	-0.6333	-85.087	-95.117	1876.821	-2.6953	1.9004	-0.79492	NaN	NaN	NaN	NaN	NaN	NaN
2.878	11.11	101.49006	1022.707	-1.2402	0.66406	-0.26855	87.466	-332.529	1138.549	-0.49316	0.38916	-0.63916	-59.907	-79.324	1835.5647	-2.7734	1.9219	-0.80762	NaN	NaN	NaN	NaN	NaN	NaN
2.88	9.666	81.77	1013.1199	-1.2023	0.64366	-0.2582	114.955	-390.99	1232.146	-0.53662	0.38623	-0.63818	-70.232	-10.0672	1814.6013	-2.8247	1.9663	-0.80957	NaN	NaN	NaN	NaN	NaN	NaN
2.882	-11.7466	74.978	983.69127	-1.169	0.62324	-0.25054	161.157	-376.118	1337.0265	-0.58838	0.40576	-0.63135	-43.77	-1.434	1813.5572	-2.875	2.0527	-0.81641	NaN	NaN	NaN	NaN	NaN	NaN
2.884	-21.6335	82.103	975.1831	-1.1311	0.60477	-0.24822	125.596	-344.014	1391.328	-0.76953	0.50879	-0.5918	-33.096	71.993	1786.4601	-2.8945	2.1797	-0.81104	NaN	NaN	NaN	NaN	NaN	NaN
2.886	-26.9686	109.581	957.556	-1.1012	0.57755	-0.23954	128.679	-341.231	1406.102	-0.9617	0.6294	-0.57592	-5.413	70.5312	1770.807	-2.8633	2.2285	-0.79395	NaN	NaN	NaN	NaN	NaN	NaN
2.888	-48.803	112.433	922.409	-1.0645	0.55469	-0.22754	125.139	-269.0416	1402.694	-1.1758	0.77148	-0.54541	-12.451	138.694	1766.844	-2.6973	2.2402	-0.72559	NaN	NaN	NaN	NaN	NaN	NaN
2.89	-67.535	108.8944	886.8845	-1.0292	0.53228	-0.22052	76.445	-223.5684	1405.476	-1.4585	0.98096	-0.5249	-0.1726	116.621	1788.414	-2.5122	2.1879	-0.6626	NaN	NaN	NaN	NaN	NaN	NaN
2.892	-60.075	108.8753	853.766	-0.99291	0.50829	-0.21358	130.95	-198.134	1401.321	-1.5879	1.1016	-0.51855	12.66	152.977	1778.159	-2.5073	2.1782	-0.80029	NaN	NaN	NaN	NaN	NaN	NaN
2.894	-71.037	108.038001	839.3417	-0.9538	0.48715	-0.20618	106.632	-149.858	1417.063	-1.8164	1.3633	-0.54883	52.46	116.712	1764.308	-2.312	2.022	-0.80127	NaN	NaN	NaN	NaN	NaN	NaN
2.896	-81.538	117.6915	830.4232	-0.91692	0.4634	-0.2003	93.553	-160.152	1456.004	-1.96	1.5342	-0.58838	54.8626	141.749	1749.043	-2.2051	1.8848	-0.72656	NaN	NaN	NaN	NaN	NaN	NaN
2.898	-52.4376	123.5168	811.70659	-0.87695	0.44238	-0.19385	108.409	-143.318	1466.119	-2.0757	1.6743	-0.61865	70.113	76.476	1782.0135	-2.105	1.6333	-0.63379	NaN	NaN	NaN	NaN	NaN	NaN
2.9	-34.2036	136.7342	770.0017	-0.84124	0.41954	-0.18633	55.1394	-141.724	1463.664	-2.209	1.8145	-0.65332	61.0316	110.65	1766.901	-2.0586	1.5371	-0.64551	NaN	NaN	NaN	NaN	NaN	NaN
2.902	-35.7815	127.734	743.2829	-0.80691	0.40043	-0.17793	30.4655	-185.7233	1471.074	-2.2612	1.8638	-0.6665	65.976	63.6	1748.342	-1.998	1.4648	-0.66406	NaN	NaN	NaN	NaN	NaN	NaN
2.904	-16.791	119.4612	735.2203	-0.77218	0.3782	-0.17132	27.985	-179.148	1497.5783	-2.3452	1.9419	-0.68213	71.736	104.716	1715.412	-1.9038	1.4048	-0.67334	NaN	NaN	NaN	NaN	NaN	NaN
2.906	5.673	120.7247	718.87051	-0.74151	0.36	-0.15883	-9.32529	-181.3457	1541.874	-2.3289	1.9583	-0.66016	101.04	33.703	1706.085	-1.8672	1.375	-0.66455	NaN	NaN	NaN	NaN	NaN	NaN
2.908	30.0098	130.06219	700.001	-0.71045	0.34082	-0.15234	2.0654	-182.7273	1580.335	-2.3867	1.9551	-0.71875	74.551986284	60.269	1667.055	-1.8047	1.3398	-0.6333	NaN	NaN	NaN	NaN	NaN	NaN
2.91	7.7374	127.906	676.121	-0.68229	0.32347	-0.14393	-18.8446	-142.6547	1596.2363	-2.4175	1.9868	-0.84131	83.216	41.8	1662.321	-1.7693	1.3274	-0.61792	NaN	NaN	NaN	NaN	NaN	NaN
2.912	15.6364	121.025	652.8616	-0.65137	0.30771	-0.12566	-28.512	-187.279	1642.825	-2.3901	1.9946	-0.8667	20.089	143.833	1605.704	-1.7344	1.3184	-0.60742	NaN	NaN	NaN	NaN	NaN	NaN
2.914	34.14916	114.5216	625.773	-0.62388	0.29127	-0.1225	5.915	-195.138	1679.301	-2.3223	1.998	-0.85742	7.522	156.0142	1599.678	-1.6753	1.3013	-0.59033	NaN	NaN	NaN	NaN	NaN	NaN
2.916	57.6808	124.9225	619.031	-0.59571	0.27719	-0.10737	-23.6294	-181.974	1677.364	-2.2729	1.9878	-0.83789	-4.682	223.839	1555.51	-1.646	1.2817	-0.58447	NaN	NaN	NaN	NaN	NaN	NaN
2.918	45.80017	124.0196	579.6017	-0.56836	0.26074	-0.097656	25.79	-184.112	1661.677	-2.209	1.9805	-0.82617	-54.6599	202.52	1538.283	-1.5815	1.2466	-0.55029	NaN	NaN	NaN	NaN	NaN	NaN
2.92	38.6894	119.9585	558.2112	-0.54369	0.2538	-0.082775	59.58106	-149.414	1609.7349	-2.0972	1.9634	-0.81787	-81.335	258.871	1450.46572	-1.5347	1.2017	-0.51904	NaN	NaN	NaN	NaN	NaN	NaN
2.922	63.804	118.6304	537.2305	-0.51658	0.24063	-0.072294	29.883	-149.211	1588.8111	-2.0269	1.9458	-0.81396	-89.068	219.527	1389.718	-1.5176	1.1816	-0.50293	NaN	NaN	NaN	NaN	NaN	NaN
2.924	30.9777	125.059	518.3164	-0.48613	0.22959	-0.062103	71.4203	-131.543	1601.27385	-1.9121	1.8691	-0.79688	-122.5908	265.2364	1306.645	-1.4824	1.1338	-0.47412	NaN	NaN	NaN	NaN	NaN	NaN
2.926	32.1134	117.5403	503.071	-0.45797	0.21975	-0.05049	64.202	-90.756	1591.701	-1.865	1.7923	-0.77221	-136.344	232.4	1303.709	-1.4539	1.0974	-0.44971	NaN	NaN	NaN	NaN	NaN	NaN
2.928	50.854	119.1583	479.21082	-0.42627	0.2085	-0.04248	78.414	-66.297	1590.688	-1.834	1.7129	-0.74316	-146.7143	271.985	1257.21	-1.4194	1.0649	-0.42627	NaN	NaN	NaN	NaN	NaN	NaN
2.93	54.78041	124.9791	457.3136	-0.39472	0.19916	-0.02879	129.639	-20.461	1588.381	-1.8105	1.6094	-0.70117	-113.687	229.514	1204.95	-1.3652	1.0176	-0.39844	NaN	NaN	NaN	NaN	NaN	NaN
2.932	-3.438	142.4579	439.4184	-0.36299	0.18652	-0.020584	101.06	10.914	1598.382	-1.8081	1.5669	-0.68994	-123.11099	267.227	1152.035	-1.3315	0.99463	-0.38086	NaN	NaN	NaN	NaN	NaN	NaN
2.934	-8.989	130.026	421.4614	-0.33312	0.17897	-0.011902	118.522	28.568	1601.6519	-1.7891	1.4609	-0.6582	-120.438	239.2348	1176.1284	-1.2578	0.94531	-0.34912	NaN	NaN	NaN	NaN	NaN	NaN
2.936	-8.5	124.082	396.3238	-0.3033	0.16614	-0.0012486	134.461	47.566	1601.7798	-1.779	1.4084	-0.64575	-130.383	301.768	1163.241	-1.1906	0.89526	-0.32788	NaN	NaN	NaN	NaN	NaN	NaN
2.938	-18.02352	126.618	382.8732	-0.27734	0.16113	0.003418	115.991	28.048	1607.83774	-1.7612	1.3677	-0.63867	-132.191	289.374	1104.55922	-1.1167	0.84814	-0.2998	NaN	NaN	NaN	NaN	NaN	NaN
2.94	-35.92332	121.473	363.375	-0.2548	0.15803	0.0094558	146.684	-21.9779	1628.996	-1.7339	1.3228	-0.62744	-127.3963	314.8311	1039.902	-1.019	0.771	-0.27393	NaN	NaN	NaN	NaN	NaN	NaN
2.942	-47.1151	119.4922	340.4126	-0.2293	0.15603	0.017026	138.324	-34.7603	1633.4274	-1.7148	1.3008	-0.62207	-123.774	249.331	1019.876	-0.97656	0.73047	-0.26172	NaN	NaN	NaN	NaN	NaN	NaN
2.944	-46.4101	119.7407	322.297	-0.20818	0.15259	0.022318	119.046	-57.836	1632.034	-1.6597	1.27	-0.60498	-81.008	255.511	975.3337	-0.88623	0.65674	-0.22412	NaN	NaN	NaN	NaN	NaN	NaN
2.946	-51.46	128.3112	295.9123	-0.19164	0.14835	0.026814	159.484	-49.9422	1634.923	-1.6333	1.2549	-0.5962	-61.252	241.658	927.2885	-0.82568	0.60791	-0.20996	NaN	NaN	NaN	NaN	NaN	NaN
2.948	-52.124	112.0946	281.1892	-0.17383	0.14746	0.033203	95.162	-37.3886	1602.671	-1.6074	1.25	-0.57813	-43.033	306.994	841.4112	-0.76855	0.56152	-0.18896	NaN	NaN	NaN	NaN	NaN	NaN
2.95	-38.23006	90.943	280.0882	-0.15167	0.14738	0.037347	83.213	-58.2944	1586.978	-1.5898	1.2344	-0.56201	-41.882	285.446	815.0599	-0.69775	0.5083	-0.16357	NaN	NaN	NaN	NaN	NaN	NaN
2.952	-22.6301	93.693	253.5932	-0.13612	0.14574	0.040264	88.059	-19.7933	1575.047	-1.5854	1.231	-0.55127	-29.161	287.353	790.181	-0.6582	0.47852	-0.14893	NaN	NaN	NaN	NaN	NaN	NaN
2.954	-23.2651	108.8443	237.5313	-0.12151	0.14376	0.047804	47.87951	11.918	1540.571	-1.584	1.2129	-0.5293	-12.48	241.618	735.749	-0.57959	0.43066	-0.12598	NaN	NaN	NaN	NaN	NaN	NaN
2.956	-37.9547	104.902	234.2825	-0.10177	0.13791	0.05227	75.298	19.687	1557.933	-1.5769	1.1975	-0.51245	22.36	258.8408	664.9556	-0.51953	0.39063	-0.10327	NaN	NaN	NaN	NaN	NaN	NaN
2.958	-5.796	93.566	232.1463	-0.085938	0.13867	0.048828	19.2563	75.407	1528.1548	-1.5679	1.1782	-0.49902	42.734	235.343	632.1656	-0.45557	0.34961	-0.078125	NaN	NaN	NaN	NaN	NaN	NaN
2.96	3.936	91.323	213.475	-0.069196	0.12977	0.057605	-18.1187	111.251	1501.708317	-1.5425	1.145	-0.48389	8.978	244.7316	589.75124	-0.37256	0.29834	-0.054688	NaN	NaN	NaN	NaN	NaN	NaN
2.962	11.883	90.5547	198.885	-0.051005	0.12734	0.058695	16.0846	144.895	1473.219408	-1.5273	1.127	-0.46875	-11.981	230.252	557.7308	-0.3291	0.26904	-0.043945	NaN	NaN	NaN	NaN	NaN	NaN
2.964	11.682	78.0368	185.5421	-0.033831	0.1242	0.059475	-10.7539	167.202	1418.782	-1.4766	1.0781	-0.45996	-8.423	261.831	497.674	-0.24365	0.20801	-0.016602	NaN	NaN	NaN	NaN	NaN	NaN
2.966	18.723	69.2207	171.6379	-0.013742	0.11825	0.05898	-13.9803	123.801	1407.217	-1.4288	1.0298	-0.44874	-23.745	231.703	453.381	-0.18408	0.17138	-0.0058594	NaN	NaN	NaN	NaN	NaN	NaN
2.968	38.0743	77.5577	148.9308	0.0024414	0.11377	0.061523	-12.56341	113.256	1384.7288	-1.377	0.98633	-0.43848	-19.19	221.699	442.552	-0.12988	0.12695	0.01123	NaN	NaN	NaN	NaN	NaN	NaN
2.97	47.6469	84.394	140.8	0.020395	0.10529	0.059471	-27.144	99.801	1340.79	-1.2983	0.92041	-0.42334	-27.559	162.953	421.067	-0.062012	0.076172	0.024902	NaN	NaN	NaN	NaN	NaN	NaN
2.972	60.8656	74.2569	133.487	0.032218	0.099325	0.059663	-5.15123	69.777	1315.159	-1.2632	0.88428	-0.42139	-61.2845	181.3823	357.731	-0.027344	0.04834	0.029785	NaN	NaN	NaN	NaN	NaN	NaN
2.974	50.7596	59.5008	118.475	0.044712	0.093072	0.063182	-33.972	87.127	1290.157	-1.1968	0.82471	-0.40576	-37.8	149.0069	277.0204	0.02002	0.0014648	0.038574	NaN	NaN	NaN	NaN	NaN	NaN
2.976	63.434	59.99442	122.6449	0.054393	0.082816	0.064063	-33.737	71.116	1270.8627	-1.153	0.79028	-0.40063	-40.478	147.394	234.058	0.046875	-0.036377	0.042724	NaN	NaN	NaN	NaN	NaN	NaN
2.978	38.2209	64.4466	112.451	0.060059	0.074707	0.065918	4.321	81.679	1270.824	-1.1167	0.76221	-0.39209	-58.962	94.372	182.624	0.068848	-0.068359	0.049805	NaN	NaN	NaN	NaN	NaN	NaN
2.98	42.7951	63.3564	127.914	0.06211	0.063279	0.065919	-18.149	128.2239	1226.808	-1.0747	0.73486	-0.37744	-31.32	106.946	157.23	0.077148	-0.1001	0.049316	NaN	NaN	NaN	NaN	NaN	NaN
2.982	37.4942	70.8395	107.896	0.062208	0.057419	0.065626	20.2855	103.5206	1218.759	-1.0566	0.72852	-0.37109	-67.4042	109.018	95.572	0.071289	-0.11572	0.050781	NaN	NaN	NaN	NaN	NaN	NaN
2.984	19.0078	65.1287	88.766	0.060252	0.047654	0.067969	49.476	151.536	1207.692	-1.0249	0.70947	-0.35596	-95.073	154.591	97.623	0.048828	-0.14111	0.048828	NaN	NaN	NaN	NaN	NaN	NaN
2.986	-7.725	54.5327	74.4301	0.0583	0.039843	0.071582	40.001	174.44	1149.624	-0.99855	0.70166	-0.3291	-100.156	147.593	87.529	0.01709	-0.15283	0.051026	NaN	NaN	NaN	NaN	NaN	NaN
2.988	-13.668	39.037	63.51499	0.055176	0.035156	0.069336	66.523	166.313	1115.5012	-0.97803	0.68994	-0.31396	-103.445	149.203	112.43	-0.025391	-0.15625	0.054199	NaN	NaN	NaN	NaN	NaN	NaN
2.99	-17.977	40.88032	61.7018	0.050196	0.029981	0.072071	63.046	202.619	1071.965	-0.94092	0.67725	-0.29102	-106.3712	121.843	50.6768	-0.10303	-0.14795	0.063477	NaN	NaN	NaN	NaN	NaN	NaN
2.992	-25.21433	48.1045	56.29	0.04873	0.027442	0.07373	57.0831	173.5995	1046.5838	-0.92871	0.66504	-0.28174	-80.758	118.27	21.226	-0.14014	-0.1333	0.069336	NaN	NaN	NaN	NaN	NaN	NaN
2.994	-38.5151	34.213	63.4454	0.049512	0.022755	0.073731	90.388	169.3717	1040.662	-0.8877	0.63477	-0.25879	-42.401	83.338	-5.057	-0.22266	-0.1084	0.078125	NaN	NaN	NaN	NaN	NaN	NaN
2.996	-40.1583	23.39	42.3462	0.052148	0.018262	0.072949	47.6576	208.075	968.5764	-0.85401	0.61767	-0.24317	-68.6	79.9139	14.461	-0.28003	-0.088623	0.099366	NaN	NaN	NaN	NaN	NaN	NaN
2.998	-38.1599	20.455	39.2994	0.053711	0.015137	0.073242	33.7556	185.9001	945.1592	-0.81152	0.59473	-0.22754	-10.596	56.2877	1.935	-0.33105	-0.065918	0.11182	NaN	NaN	NaN	NaN	NaN	NaN
3	-35.6462	28.698	25.4925	0.055762	0.0083007	0.073144	56.976	214.433	923.572	-0.75537	0.55908	-0.2041	15.645	60.1633	6.325	-0.38916	-0.027832	0.12207	NaN	NaN	NaN	NaN	NaN	NaN
3.002	-35.7244	22.2718	29.4952	0.061328	0.0024414	0.069727	-0.526	201.767	877.461	-0.72852	0.53906	-0.19189	22.454	36.2025	-31.903	-0.41602	-0.0068359	0.12256	NaN	NaN	NaN	NaN	NaN	NaN
3.004	-42.9998	30.6063	25.2512	0.068359	-0.0010743	0.070117	22.7585	161.9698	875.495	-0.66309	0.50586	-0.17236	34.8326	28.853	25.404	-0.45313	0.03125	0.12646	NaN	NaN	NaN	NaN	NaN	NaN
3.006	-36.8786	30.3931	18.0323	0.074023	-0.0081055	0.066309	12.196	209.233	861.5582	-0.61084	0.47754	-0.15649	34.985	18.862	37.6837	-0.47144	0.04834	0.12988	NaN	NaN	NaN	NaN	NaN	NaN
3.008	-33.1552	17.0603	21.09338	0.078613	-0.01123	0.06543	0	184.874	838.12	-0.56396	0.45068	-0.14111	50.2201	34.319	58.699	-0.48486	0.066406	0.13574	NaN	NaN	NaN	NaN	NaN	NaN
3.01	-29.1731	10.4116	33.624	0.090918	-0.019922	0.067969	-11.479	173.56836	855.454	-0.49756	0.41797	-0.12451	45.175	24.4327	25.22	-0.50635	0.093262	0.13818	NaN	NaN	NaN	NaN	NaN	NaN
3.012	-25.4443	11.8965	25.7033	0.095508	-0.026465	0.064063	-54.114	211.0122	786.161	-0.46826	0.39355	-0.11621	49.018	10.6504	60.183	-0.52002	0.10693	0.13818	NaN	NaN	NaN	NaN	NaN	NaN
3.014	11.8722	34.6296	15.87135	0.10019	-0.031153	0.061328	-30.5928	162.549	740.605	-0.41602	0.35547	-0.091797	33.872	-1.8418	37.0679	-0.54395	0.12939	0.13965	NaN	NaN	NaN	NaN	NaN	NaN
3.016	10.8	22.9358	19.6949	0.10137	-0.031641	0.063184	0.684000000000001	187.8641	694.159	-0.36719	0.32031	-0.072266	44.38385	14.751	73.392	-0.56079	0.1377	0.13721	NaN	NaN	NaN	NaN	NaN	NaN
3.018	23.001	4.59185	5.0502	0.10254	-0.029785	0.064453	-42.0713	170.596	628.557	-0.34619	0.30566	-0.06543	55.2511	45.363	31.2035	-0.57227	0.14453	0.14307	NaN	NaN	NaN	NaN	NaN	NaN
3.02	44.0502	-2.57969	10.5805	0.10078	-0.028906	0.06543	-53.4371	124.693	626.8817	-0.30762	0.27246	-0.047852	17.5942	49.5553	45.904	-0.58154	0.15625	0.14844	NaN	NaN	NaN	NaN	NaN	NaN
3.022	55.6024	-4.4474	5.8579	0.094434	-0.026563	0.066211	-64.709	175.645	579.6087	-0.28492	0.25416	-0.033203	41.586	35.511	39.8457	-0.57568	0.15723	0.15137	NaN	NaN	NaN	NaN	NaN	NaN
3.024	57.029	-4.51682	8.6345	0.090918	-0.025	0.067774	-78.034	150.531	530.7961	-0.26318	0.23633	-0.012207	8.095	-1.746	49.153	-0.55811	0.16064	0.16992	NaN	NaN	NaN	NaN	NaN	NaN
3.026	51.9191	-3.1824	21.2577	0.085644	-0.015234	0.069922	-39.512	154.055	513.1772	-0.25586	0.2124	0.010742	-12.967	-5.545	-19.2374	-0.5376	0.16455	0.17944	NaN	NaN	NaN	NaN	NaN	NaN
3.028	46.352	13.8103	10.3062	0.076172	-0.0048828	0.068848	-47.028	191.379	453.411	-0.25049	0.20459	0.02002	3.845	-2.4841	2.207	-0.50977	0.16602	0.18848	NaN	NaN	NaN	NaN	NaN	NaN
3.03	49.5699	17.0322	21.7929	0.071289	0.0020508	0.06875	-33.828	153.661	438.3313	-0.24756	0.18555	0.037598	-1.031	10.518	-6.043904	-0.45117	0.15723	0.19824	NaN	NaN	NaN	NaN	NaN	NaN
3.032	43.7037	8.0728	25.6171	0.063672	0.0074218	0.072168	12.567	194.828	399.648	-0.24585	0.17114	0.052002	-59.7667	-11.8863	29.557	-0.42432	0.15381	0.20361	NaN	NaN	NaN	NaN	NaN	NaN
3.034	31.00416	3.8192	22.461	0.057422	0.016797	0.082715	-3.9809	195.565	357.624	-0.23584	0.1582	0.058594	-63.126	0.341000000000001	-5.9406	-0.35205	0.14111	0.20459	NaN	NaN	NaN	NaN	NaN	NaN
3.036	24.9484	5.9842	6.1753	0.051953	0.022949	0.076465	33.6038	128.7737	357.2221	-0.23389	0.1333	0.071777	-83.062	-15.5549	3.3961	-0.29346	0.12866	0.20337	NaN	NaN	NaN	NaN	NaN	NaN
3.038	25.0986	17.331	2.3568	0.044434	0.028809	0.07666	24.9226	150.9086	335.6642	-0.22754	0.12305	0.080566	-73.3742	-11.369	-5.0266	-0.23242	0.10645	0.20654	NaN	NaN	NaN	NaN	NaN	NaN
3.04	7.478	13.8954	11.9216	0.037402	0.036621	0.075586	49.66	98.061	301.7612	-0.21533	0.10693	0.089844	-78.91	-31.731	49.013	-0.15088	0.069336	0.20459	NaN	NaN	NaN	NaN	NaN	NaN
3.042	17.4815	20.9964	6.6828	0.030371	0.042676	0.073828	62.819	94.785	286.2522	-0.20947	0.093018	0.094971	-68.24032	-9.229	22.7127	-0.11426	0.046387	0.20361	NaN	NaN	NaN	NaN	NaN	NaN
3.044	3.925	13.7981	0.1174	0.022949	0.050879	0.075	48.937	152.234	234.1689	-0.20898	0.08252	0.098633	-80.498	-9.2647	-11.6787	-0.037598	0.0053711	0.19971	NaN	NaN	NaN	NaN	NaN	NaN
3.046	-23.116	17.87277	10.5534	0.016699	0.058399	0.074414	65.961	94.01	230.555	-0.20117	0.070313	0.10742	-51.9602	19.244	-49.416	0.022949	-0.031494	0.1897	NaN	NaN	NaN	NaN	NaN	NaN
3.048	-32.1658	-5.99439	49.0217	0.0097656	0.062988	0.070801	57.5141	123.482	217.044	-0.19385	0.062988	0.10498	-43.21242	-7.016	-31.5613	0.085449	-0.069824	0.17188	NaN	NaN	NaN	NaN	NaN	NaN
3.05	-41.6093	-35.757	65.513	0.00068364	0.071289	0.068359	56.122	102.4065	151.142	-0.19385	0.052734	0.11084	-30.097	18.051	-29.674	0.17822	-0.12598	0.15674	NaN	NaN	NaN	NaN	NaN	NaN
3.052	-49.8264	-32.53954	80.20674	-0.009961	0.080078	0.060839	91.61	35.608	155.1321	-0.18775	0.048584	0.1189	-20.349	15.4113	-10.5845	0.24585	-0.16138	0.13989	NaN	NaN	NaN	NaN	NaN	NaN
3.054	-47.1274	-24.7908	69.642	-0.024414	0.090625	0.05498	72.273	94.1376	140.8518	-0.18164	0.046875	0.12256	14.209	67.2002	-4.196	0.30713	-0.19482	0.12793	NaN	NaN	NaN	NaN	NaN	NaN
3.056	-56.9458	-18.0625	126.4763	-0.045313	0.10547	0.048828	53.578	64.5268	141.7108	-0.16553	0.04541	0.12842	-1.922	43.094	-1.683	0.375	-0.229	0.12354	NaN	NaN	NaN	NaN	NaN	NaN
3.058	-89.2855	-7.7697	185.956	-0.072266	0.11621	0.039063	51.5537	87.6587	137.024	-0.1499	0.045898	0.13135	13.883	67.89	26.959	0.4082	-0.24414	0.12256	NaN	NaN	NaN	NaN	NaN	NaN
3.06	-92.135	13.1902	245.625	-0.11182	0.12764	0.029102	16.0727	151.221	67.7867	-0.13135	0.040039	0.13477	-2.264	29.7828	25.6831	0.4458	-0.26611	0.11377	NaN	NaN	NaN	NaN	NaN	NaN
3.062	-67.905	17.2973	342.003	-0.16396	0.13525	0.013672	9.5152	93.035	63.433	-0.11524	0.040771	0.13159	30.529	77.92	-9.3474	0.46264	-0.27539	0.10694	NaN	NaN	NaN	NaN	NaN	NaN
3.064	-48.785	10.3387	449.5259	-0.21943	0.14541	-0.0027343	12.502	109.856	53.738	-0.096191	0.039063	0.13379	34.7894	46.011	-9.471	0.47266	-0.28174	0.10352	NaN	NaN	NaN	NaN	NaN	NaN
3.066	-75.608	-1.4373	546.7368	-0.28711	0.1583	-0.02334	-38.93841	89.576	31.8279	-0.07959	0.040527	0.13379	60.896	56.182	20.586	0.47461	-0.27783	0.10156	NaN	NaN	NaN	NaN	NaN	NaN
3.068	-66.155	-5.7182	606.1927	-0.37354	0.17041	-0.040527	-14.013	34.7285	37.0718	-0.074219	0.036133	0.13721	37.7618	6.7307	26.4144	0.47119	-0.27441	0.095215	NaN	NaN	NaN	NaN	NaN	NaN
3.07	-40.486	-7.876	647.146	-0.48213	0.19082	-0.048926	-19.79611	76.7405	25.663	-0.061523	0.02832	0.14258	56.40059	37.726	39.3364	0.45313	-0.26074	0.10254	NaN	NaN	NaN	NaN	NaN	NaN
3.072	-16.872	-3.402	688.2433	-0.61386	0.22227	-0.066895	-56.417	6.253	21.051	-0.054687	0.01831	0.14795	45.8708	3.7986	17.9778	0.42505	-0.2539	0.10376	NaN	NaN	NaN	NaN	NaN	NaN
3.074	12.7121	0.0760000000000005	728.35	-0.76738	0.27031	-0.089941	-53.1871	-23.3216	35.7467	-0.048828	0.0083008	0.14746	56.5913	31.3764	35.832	0.39795	-0.23975	0.10693	NaN	NaN	NaN	NaN	NaN	NaN
3.076	18.1299	-16.971	779.044	-0.9332	0.3375	-0.10459	-52.3335	33.7252	2.6713	-0.037109	-0.0019531	0.15137	20.454	-8.808	61.494	0.3584	-0.21484	0.10547	NaN	NaN	NaN	NaN	NaN	NaN
3.078	53.6356	-28.571	811.4223	-1.105	0.42139	-0.11523	-34.7604	-3.9932	-13.44704	-0.028809	-0.0087891	0.15576	-3.89	25.1994	51.557	0.33838	-0.20361	0.10498	NaN	NaN	NaN	NaN	NaN	NaN
3.08	86.3027	-42.306	852.546	-1.2856	0.50889	-0.12334	-32.4538	44.053	2.3863	-0.0092773	-0.026367	0.15674	-6.246	17.6606	25.2468	0.28955	-0.18213	0.10693	NaN	NaN	NaN	NaN	NaN	NaN
3.082	77.775681	-35.2166	875.832	-1.4573	0.60674	-0.12715	-56.666	46.525	0.8916	0.0090334	-0.040772	0.15722	-3.163	47.264	37.30125	0.26098	-0.1582	0.1145	NaN	NaN	NaN	NaN	NaN	NaN
3.084	76.028	-35.6795	903.301	-1.6241	0.71182	-0.13691	-43.603	-23.912	20.5769	0.02832	-0.056152	0.15625	-33.983	-7.8141	26.197	0.22949	-0.13477	0.11816	NaN	NaN	NaN	NaN	NaN	NaN
3.086	101.994	-48.149	919.162	-1.759	0.80782	-0.14541	3.43	26.914	1.7507	0.055664	-0.067871	0.15869	-59.4516	17.6861	34.8857	0.1958	-0.10449	0.11377	NaN	NaN	NaN	NaN	NaN	NaN
3.088	118.353	-75.099	924.229	-1.8613	0.91211	-0.15234	7.5743	-12.544	2.1684	0.069824	-0.084961	0.15869	-66.4098	-4.3115	4.2822	0.18018	-0.09082	0.11523	NaN	NaN	NaN	NaN	NaN	NaN
3.09	94.187	-70.8078	918.26	-1.9116	1.0114	-0.14991	5.299	-20.1137	23.3964	0.099609	-0.10205	0.16309	-50.3977	39.252	-8.686	0.15234	-0.062012	0.1123	NaN	NaN	NaN	NaN	NaN	NaN
3.092	77.788	-45.758	936.427	-1.9211	1.107	-0.14785	17.481	51.521	3.2646	0.11475	-0.11718	0.16479	-30.569	9.0085	7.30967	0.12719	-0.041992	0.1123	NaN	NaN	NaN	NaN	NaN	NaN
3.094	72.94	-26.908	963.122	-1.8879	1.1871	-0.14433	33.5559	13.83981	14.2115	0.13672	-0.12988	0.16162	-80.742	3.0925	41.0399	0.10059	-0.020508	0.11572	NaN	NaN	NaN	NaN	NaN	NaN
3.096	59.447	-33.234	950.7688	-1.8157	1.2339	-0.14404	46.698	59.955	3.877	0.16162	-0.14404	0.16162	-88.005	-33.3391	19.9233	0.06543	0.0092773	0.11475	NaN	NaN	NaN	NaN	NaN	NaN
3.098	50.942	-51.569	929.46406	-1.7188	1.2344	-0.146	61.652	44.448	0.707000000000001	0.1748	-0.14795	0.16113	-67.9109	-9.6322	-12.8297	0.043945	0.027832	0.11182	NaN	NaN	NaN	NaN	NaN	NaN
3.1	23.5655	-76.71	925.2547	-1.6152	1.1837	-0.14834	67.664	-38.6709	30.1114	0.19678	-0.16211	0.15723	-28.731	-10.646	-19.777	0.016602	0.060059	0.10742	NaN	NaN	NaN	NaN	NaN	NaN
3.102	41.9	-91.0103	923.928	-1.514	1.1044	-0.14892	44.6535	26.6429	0.630000000000001	0.21216	-0.16407	0.16064	-50.66331	-3.421	22.2961	0.0029297	0.079101	0.10816	NaN	NaN	NaN	NaN	NaN	NaN
3.104	44.2772	-100.9365	934.6897	-1.4284	1.0149	-0.14502	66.757	-18.78535	-4.295	0.22803	-0.16992	0.16895	-24.438	-13.113	11.4736	-0.0092773	0.09668	0.10303	NaN	NaN	NaN	NaN	NaN	NaN
3.106	29.2338	-100.3864	935.774	-1.3606	0.93056	-0.13204	61.642	-32.788	18.887	0.24463	-0.17578	0.16602	-24.849	-4.7073	6.5214	-0.019043	0.11523	0.09668	NaN	NaN	NaN	NaN	NaN	NaN
3.108	24.677	-112.8519	936.66	-1.3066	0.86914	-0.095215	36.8009	12.0702	18.4652	0.24658	-0.18262	0.1709	-1.499	-6.443	-32.917	-0.021973	0.12158	0.09375	NaN	NaN	NaN	NaN	NaN	NaN
3.11	50.356	-131.542	956.783	-1.2728	0.82725	-0.069922	58.599	-47.982	24.0458	0.25244	-0.18555	0.1792	1.552	-14.2358	-8.2928	-0.031738	0.13037	0.086914	NaN	NaN	NaN	NaN	NaN	NaN
3.112	21.4952	-159.549	967.949	-1.2449	0.80938	-0.044531	54.4062	-6.532976	22.94583	0.25635	-0.19239	0.17895	7.611	8.7836	12.253	-0.041259	0.13306	0.084473	NaN	NaN	NaN	NaN	NaN	NaN
3.114	-7.295	-177.518	993.046	-1.2109	0.80899	-0.020313	26.1024	25.375	12.4027	0.26025	-0.19336	0.17725	6.615	39.771	12.7185	-0.054688	0.13281	0.083496	NaN	NaN	NaN	NaN	NaN	NaN
3.116	-10.731	-171.578	1018.922	-1.1729	0.8208	-0.000293	12.5561	-19.5202	37.6835	0.25146	-0.18896	0.18262	49.216	73.691	-25.2494	-0.070313	0.13721	0.070801	NaN	NaN	NaN	NaN	NaN	NaN
3.118	-30.9119	-158.2231	1034.568	-1.1387	0.83398	0.0097656	7.3191	34.377	21.5493	0.24707	-0.19238	0.18066	40.2024	52.429	4.239	-0.079102	0.14258	0.061523	NaN	NaN	NaN	NaN	NaN	NaN
3.12	-59.214	-142.308	1022.223	-1.1083	0.84365	0.017871	-24.9606	-22.926	-7.0131	0.23779	-0.18701	0.18555	15.022	47.7898	-8.3785	-0.094238	0.14063	0.059082	NaN	NaN	NaN	NaN	NaN	NaN
3.122	-49.3942	-158.627	1039.4294	-1.0816	0.85039	0.028027	-22.606	-45.246	-0.333	0.22363	-0.18286	0.1897	27.856	30.215	5.733	-0.1084	0.14404	0.051513	NaN	NaN	NaN	NaN	NaN	NaN
3.124	-35.5402	-166.729	1055.948	-1.0605	0.84961	0.03584	-30.9852	5.8661	-19.761	0.2124	-0.17334	0.19189	60.7371	62.4279	-11.9325	-0.12695	0.13965	0.046875	NaN	NaN	NaN	NaN	NaN	NaN
3.126	-15.6966	-159.613	1086.0278	-1.037	0.84678	0.042676	-45.637	-42.223	-13.6445	0.19482	-0.16455	0.18652	53.7473	44.228	-1.807	-0.13916	0.14795	0.042969	NaN	NaN	NaN	NaN	NaN	NaN
3.128	-16.6873	-142.7743	1099.581	-1.0171	0.83545	0.046387	-31.3831	18.0063	-4.2517	0.1875	-0.16211	0.18896	35.4219	56.463	28.7905	-0.1499	0.15527	0.035156	NaN	NaN	NaN	NaN	NaN	NaN
3.13	-6.099	-134.324	1120.314	-0.99533	0.81523	0.042774	-47.773	45.675	-29.974	0.16455	-0.13867	0.18506	-1.225	-18.201	93.6738	-0.16113	0.17041	0.021973	NaN	NaN	NaN	NaN	NaN	NaN
3.132	-1.991	-146.025	1147.1496	-0.9626	0.78604	0.028906	-48.8636	-9.7137	-2.517	0.15137	-0.12427	0.18042	-8.553	-26.4906	82.3898	-0.17408	0.18115	0.010986	NaN	NaN	NaN	NaN	NaN	NaN
3.134	17.951	-140.824	1152.7876	-0.92978	0.74385	0.0035156	-42.9486	38.9484	-5.2127	0.1377	-0.10498	0.17578	-5.20999999999999	-20.262	151.037	-0.17822	0.18799	0.00048828	NaN	NaN	NaN	NaN	NaN	NaN
3.136	18.009	-152.817	1170.429	-0.89649	0.69882	-0.024414	-32.4545	-17.62625	-6.033	0.12012	-0.082031	0.16553	21.627	43.799	236.2819	-0.19092	0.19971	-0.03125	NaN	NaN	NaN	NaN	NaN	NaN
3.138	9.012	-140.7336	1174.924	-0.86719	0.65625	-0.050293	-23.551	-25.6481	-5.08872	0.11475	-0.070801	0.17236	-59.9726	-2.73	349.822	-0.19531	0.20459	-0.046387	NaN	NaN	NaN	NaN	NaN	NaN
3.14	6.189	-143.165	1223.173	-0.84805	0.62012	-0.075195	-12.6101	26.7279	1.5036	0.104	-0.051758	0.16016	-106.5071	20.4227	494.934	-0.22217	0.21826	-0.082031	NaN	NaN	NaN	NaN	NaN	NaN
3.142	-26.36	-138.416	1252.8277	-0.84677	0.5958	-0.093847	-2.0166	-32.202	4.58605	0.088135	-0.0354	0.16235	-84.703	1.48484	657.233	-0.2666	0.23584	-0.11499	NaN	NaN	NaN	NaN	NaN	NaN
3.144	-12.092	-148.138	1272.5205	-0.86279	0.579	-0.10986	9.5003	0.8899	1.3872	0.078613	-0.016113	0.15625	-76.284	44.9237	879.118	-0.33105	0.24902	-0.15625	NaN	NaN	NaN	NaN	NaN	NaN
3.146	-4.595	-152.536	1268.80782	-0.89434	0.58106	-0.12988	28.1054	22.8882	-18.3468	0.0625	0.010742	0.14893	-86.5755	-17.3064	1136.833	-0.44824	0.27832	-0.22803	NaN	NaN	NaN	NaN	NaN	NaN
3.148	8.478	-145.2916	1274.1292	-0.93896	0.59131	-0.14111	21.3002	-23.529	-9.99	0.054688	0.025391	0.14746	-107.6657	-33.116	1303.59489	-0.51221	0.30273	-0.26221	NaN	NaN	NaN	NaN	NaN	NaN
3.15	-1.751	-137.0799	1276.7708	-1.0008	0.61094	-0.15547	33.3774	33.533	-0.788	0.038574	0.052246	0.14404	-96.918	-91.692	1379.4762	-0.68506	0.36084	-0.33057	NaN	NaN	NaN	NaN	NaN	NaN
3.152	-9.454	-128.222	1278.8684	-1.0706	0.63642	-0.17002	57.924	6.58061	-1.7807	0.02002	0.07666	0.13672	-43.751	-34.613	1463.756	-0.85718	0.43726	-0.375	NaN	NaN	NaN	NaN	NaN	NaN
3.154	-16.565	-113.855	1297.8025	-1.1562	0.66807	-0.1876	54.2841	-7.8549	10.9777	0.01123	0.089844	0.13379	-52.1759	-79.135	1523.616	-1.0679	0.53955	-0.41943	NaN	NaN	NaN	NaN	NaN	NaN
3.156	8.74	-107.879	1315.13	-1.2474	0.71123	-0.20635	61.905	47.641	-9.4167	0	0.11279	0.12842	-80.606	-100.009	1568.425	-1.4058	0.70557	-0.46582	NaN	NaN	NaN	NaN	NaN	NaN
3.158	11.345	-104.155	1321.267	-1.3472	0.76416	-0.22266	61.147	-3.0062	8.7299	-0.009033	0.12573	0.12061	-28.896	-189.282	1508.52	-1.5854	0.80908	-0.47314	NaN	NaN	NaN	NaN	NaN	NaN
3.16	-21.668	-121.202	1321.6661	-1.4556	0.83262	-0.23204	68.782	40.609	13.1269	-0.020508	0.14111	0.11719	71.102	-207.749	1449.503	-1.937	1.0181	-0.43896	NaN	NaN	NaN	NaN	NaN	NaN
3.162	-57.084	-94.48203	1313.3234	-1.5715	0.92031	-0.2209	52.306	65.225	4.6887	-0.03125	0.15186	0.11084	119.684	-280.14	1407.781	-2.1968	1.1826	-0.38623	NaN	NaN	NaN	NaN	NaN	NaN
3.164	-50.377	-64.999	1310.998	-1.6922	1.0152	-0.21465	27.1842	2.7757	12.3246	-0.035156	0.1543	0.10693	125.648	-336.13	1425.681	-2.4409	1.3403	-0.31885	NaN	NaN	NaN	NaN	NaN	NaN
3.166	-70.7924	-54.93	1313.3779	-1.8048	1.1214	-0.21152	32.4878	48.029	21.3571	-0.040527	0.16602	0.10205	152.148	-357.89	1352.417	-2.7124	1.5669	-0.26025	NaN	NaN	NaN	NaN	NaN	NaN
3.168	-83.5666	-74.617	1312.1482	-1.8984	1.2227	-0.20996	21.3929	1.82953	6.4468	-0.042969	0.17749	0.097412	175.967	-309.262	1282.957	-2.8062	1.6743	-0.24023	NaN	NaN	NaN	NaN	NaN	NaN
3.17	-76.17012	-88.829	1327.4864	-1.9623	1.3086	-0.21093	33.7991	-26.529	17.31	-0.044434	0.18457	0.097168	184.986	-228.278	1212.333	-2.8452	1.8696	-0.19336	NaN	NaN	NaN	NaN	NaN	NaN
3.172	-63.4341	-88.0838	1337.8841	-1.9897	1.3801	-0.2205	-4.7214	25.40153	-5.3715	-0.04834	0.19434	0.085938	154.999	-141.877	1227.554	-2.7137	1.925	-0.11865	NaN	NaN	NaN	NaN	NaN	NaN
3.174	-99.3306	-90.626	1333.624	-1.9866	1.4286	-0.22558	-23.8684	-32.913	-6.7752	-0.055176	0.19775	0.078125	168.304	-93.62	1199.33	-2.5034	1.8755	-0.04248	NaN	NaN	NaN	NaN	NaN	NaN
3.176	-89.52445	-78.978	1326.788	-1.9507	1.4618	-0.22149	-19.493	2.266	8.9205	-0.065918	0.2002	0.058105	164.037	-97.8	1209.314	-2.1401	1.7056	0.037598	NaN	NaN	NaN	NaN	NaN	NaN
3.178	-64.955	-65.873	1348.4501	-1.9351	1.4731	-0.229	-29.173	17.2072	1.91	-0.076661	0.20874	0.043457	107.547	-132.387	1229.549	-1.9585	1.6157	0.064941	NaN	NaN	NaN	NaN	NaN	NaN
3.18	-35.907	-57.034	1366.318	-1.9575	1.4899	-0.26397	-26.401	-30.5109	49.34	-0.10156	0.21484	0.03125	61.292	-174.913	1281.477	-1.6641	1.4688	0.104	NaN	NaN	NaN	NaN	NaN	NaN
3.182	-54.029	-67.5552	1359.6224	-1.9694	1.4997	-0.27881	-16.5067	-11.882	77.899	-0.15332	0.22705	0.0078125	72.17	-201.406	1261.24107	-1.4668	1.3652	0.16162	NaN	NaN	NaN	NaN	NaN	NaN
3.184	-66.0047	-67.0665	1348.65817	-1.9628	1.4907	-0.26826	-58.024	-61.4172	90.42294	-0.18506	0.23193	-0.013184	82.937	-234.296	1265.8202	-1.3984	1.3203	0.19629	NaN	NaN	NaN	NaN	NaN	NaN
3.186	-53.8635	-49.095	1383.281	-1.9659	1.4794	-0.25049	-45.324	-51.6807	122.5571	-0.26025	0.24463	-0.057617	114.9759	-246.668	1242.104	-1.2759	1.2251	0.25781	NaN	NaN	NaN	NaN	NaN	NaN
3.188	-61.465	-33.654	1380.4272	-1.9546	1.4751	-0.24561	-24.8148	16.7085	156.6129	-0.33715	0.26294	-0.091309	102.533	-289.308	1276.626	-1.1826	1.1612	0.2483	NaN	NaN	NaN	NaN	NaN	NaN
3.19	-80.0572	-44.2237	1361.5239	-1.9267	1.4587	-0.23906	-78.397	-44.9901	220.8476	-0.4209	0.28223	-0.12939	87.914	-355.006	1318.621	-1.0713	1.082	0.22119	NaN	NaN	NaN	NaN	NaN	NaN
3.192	-84.17	-40.4268	1332.2289	-1.8836	1.4371	-0.22812	-89.7197	-17.544	328.355	-0.57617	0.33008	-0.16797	22.77	-427.696	1376.499	-0.89258	0.95801	0.18018	NaN	NaN	NaN	NaN	NaN	NaN
3.194	-46.574	-21.3506	1331.07039	-1.8242	1.4043	-0.21875	-37.143	19.1692	445.501	-0.66992	0.35889	-0.18555	-11.542	-431.7	1424.431	-0.80859	0.89453	0.14307	NaN	NaN	NaN	NaN	NaN	NaN
3.196	-45.229	-13.645	1341.50855	-1.7655	1.3633	-0.21231	-47.563	-7.835	623.294	-0.89063	0.4375	-0.21338	-63.789	-417.222	1471.8552	-0.66406	0.75195	0.048828	NaN	NaN	NaN	NaN	NaN	NaN
3.198	-52.788	-15.7779	1314.029	-1.7065	1.3208	-0.20947	-39.562	24.4598	767.784	-1.0779	0.52759	-0.24317	-99.34768	-333.31	1516.706	-0.59106	0.66479	-0.025147	NaN	NaN	NaN	NaN	NaN	NaN
3.2	-20.416	-8.8196	1320.925	-1.6505	1.2833	-0.20683	-36.332	-41.5966	867.336	-1.2773	0.63672	-0.26318	-171.126	-258.744	1574.368	-0.55859	0.59961	-0.097656	NaN	NaN	NaN	NaN	NaN	NaN
3.202	5.51	2.98709	1330.296	-1.601	1.2497	-0.20303	-33.747	-81.282	947.492	-1.5444	0.79736	-0.27197	-199.533	-197.361	1550.368	-0.58301	0.56348	-0.18506	NaN	NaN	NaN	NaN	NaN	NaN
3.204	-18.351	-14.542	1314.7119	-1.5558	1.2169	-0.19522	-6.858	-41.153	1026.347	-1.6753	0.88721	-0.271	-175.824	-188.375	1510.24	-0.62109	0.57031	-0.22656	NaN	NaN	NaN	NaN	NaN	NaN
3.206	-54.506	-28.999	1287.6387	-1.5141	1.1847	-0.18603	0.257000000000005	-78.071	1079.113	-1.9199	1.0625	-0.25879	-127.629	-139.588	1532.7061	-0.71826	0.61182	-0.27881	NaN	NaN	NaN	NaN	NaN	NaN
3.208	-41.632	-17.8943	1287.067	-1.4761	1.1509	-0.18896	-6.922	-59.064	1112.445	-2.0693	1.1894	-0.23169	-94.694	-139.372	1573.7061	-0.80103	0.67408	-0.29639	NaN	NaN	NaN	NaN	NaN	NaN
3.21	-38.232	14.6303	1285.386	-1.445	1.13	-0.17109	40.222	-85.9271	1075.538	-2.1909	1.311	-0.21191	-68.7654	-130.416	1596.107	-0.90039	0.75195	-0.31348	NaN	NaN	NaN	NaN	NaN	NaN
3.212	-71.7769	27.0896	1266.081	-1.4141	1.0969	-0.16562	91.8133	-167.21	1076.158	-2.2832	1.4688	-0.1875	-63.356	-163.588	1576.851	-1.0796	0.89697	-0.3501	NaN	NaN	NaN	NaN	NaN	NaN
3.214	-90.6941	21.356	1240.384	-1.391	1.0699	-0.16016	102.471	-149.498	1086.139	-2.291	1.5332	-0.18945	-76.306	-187.2722	1570.784	-1.1772	0.97119	-0.36865	NaN	NaN	NaN	NaN	NaN	NaN
3.216	-52.2	26.149	1226.825	-1.3728	1.0421	-0.15185	93.208	-189.863	1065.944	-2.2168	1.6035	-0.20313	-38.308	-235.55	1592.1638	-1.3965	1.1445	-0.39893	NaN	NaN	NaN	NaN	NaN	NaN
3.218	-52.394	16.7121	1212.7025	-1.3594	1.0205	-0.15186	94.183	-209.82	1060.811	-2.0867	1.6003	-0.21533	-46.1949	-218.685	1662.819	-1.5874	1.3047	-0.41699	NaN	NaN	NaN	NaN	NaN	NaN
3.22	-79.579	15.543	1187.2736	-1.3471	0.99473	-0.14277	105.259	-149.585	1032.721	-1.9253	1.5718	-0.20996	-72.205021	-208.536	1663.77	-1.7983	1.4868	-0.43115	NaN	NaN	NaN	NaN	NaN	NaN
3.222	-58.804	32.026	1171.58244	-1.342	0.97265	-0.13428	84.13	-162.885	1007.612	-1.7207	1.5146	-0.18164	-87.7181	-162.454	1676.903	-2.1128	1.7368	-0.44482	NaN	NaN	NaN	NaN	NaN	NaN
3.224	-42.94	47.128	1194.433	-1.3408	0.94804	-0.13076	78.117	-106.27	1024.2957	-1.6387	1.4902	-0.16016	-67.756	-196.058	1684.5168	-2.2651	1.8618	-0.45508	NaN	NaN	NaN	NaN	NaN	NaN
3.226	-53.952	54.2835	1164.4396	-1.3424	0.92871	-0.12266	75.606	-54.157	1022.262	-1.5229	1.4478	-0.11377	-26.094	-196.5119	1742.095	-2.5449	2.0801	-0.46289	NaN	NaN	NaN	NaN	NaN	NaN
3.228	-77.2831	49.3126	1127.91417	-1.3433	0.91064	-0.1167	44.986	-84.918	1030.7905	-1.46	1.4141	-0.074219	35.118	-198.017	1756.963	-2.6755	2.2219	-0.44922	NaN	NaN	NaN	NaN	NaN	NaN
3.23	-52.2322	66.64725	1124.7757	-1.3375	0.8875	-0.11621	17.4221	-71.196	1048.11137	-1.3989	1.3755	-0.028809	83.947	-154.262	1741.782	-2.7266	2.332	-0.4209	NaN	NaN	NaN	NaN	NaN	NaN
3.232	-39.999	75.0649	1137.471	-1.3263	0.86699	-0.11084	-23.6738	-115.239	1036.203	-1.2964	1.3071	-0.00097656	62.648	-128.387	1681.0492	-2.4883	2.3535	-0.23633	NaN	NaN	NaN	NaN	NaN	NaN
3.234	-72.49687	77.071	1111.3353	-1.3103	0.84707	-0.096388	-10.6305	-181.867	1043.0746	-1.2295	1.2598	-0.00048828	49.5887	-84.1673	1673.5964	-2.5015	2.3188	-0.29541	NaN	NaN	NaN	NaN	NaN	NaN
3.236	-88.29	62.06084	1074.6464	-1.2903	0.82491	-0.099513	10.68	-190.857	1045.494	-1.0659	1.1743	0.015625	33.84	-52.56	1635.8876	-2.5176	2.3125	-0.47656	NaN	NaN	NaN	NaN	NaN	NaN
3.238	-42.3586	63.78173	1060.202	-1.2656	0.7998	-0.1001	36.9777	-272.5787	1063.9811	-0.94995	1.0998	0.028809	42.715	2.15932	1627.4978	-2.3945	2.2744	-0.4414	NaN	NaN	NaN	NaN	NaN	NaN
3.24	-9.083	67.1058	1071.342	-1.2408	0.77656	-0.097949	24.2377	-287.043	1133.175	-0.83789	1.0234	0.032715	50.605	26.371	1592.904	-2.3042	2.2192	-0.3335	NaN	NaN	NaN	NaN	NaN	NaN
3.242	-40.673	75.3924	1037.5662	-1.2077	0.75244	-0.10264	30.919	-257.417	1151.5183	-0.72656	0.92383	0.026855	-2.25	41.166	1602.178	-2.3164	2.1895	-0.27051	NaN	NaN	NaN	NaN	NaN	NaN
3.244	-20.189	88.0572	1011.3144	-1.1831	0.72627	-0.10029	15.94548	-300.738	1169.207	-0.69531	0.88086	0.013672	-44.826	55.311	1592.952	-2.3301	2.1973	-0.27148	NaN	NaN	NaN	NaN	NaN	NaN
3.246	12.67	99.8046	1002.1678	-1.1583	0.70772	-0.09541	8.732	-288.81	1221.862	-0.6582	0.79297	-0.03125	-79.269	97.815	1599.189	-2.271	2.188	-0.2666	NaN	NaN	NaN	NaN	NaN	NaN
3.248	18.919	102.4545	993.4712	-1.1279	0.68555	-0.099121	-4.904	-285.565	1280.121	-0.65625	0.74024	-0.083495	-71.1149	116.652	1583.136	-2.1763	2.1137	-0.27247	NaN	NaN	NaN	NaN	NaN	NaN
3.25	-5.846	98.608	972.26222	-1.1047	0.67041	-0.097754	-21.554	-293.75	1333.086	-0.6665	0.69775	-0.13184	-94.2735	110.949	1618.768	-2.0762	1.9824	-0.24854	NaN	NaN	NaN	NaN	NaN	NaN
3.252	24.971	92.365	943.0942	-1.0797	0.65176	-0.096778	-26.705	-205.064	1373.489	-0.70264	0.6626	-0.18604	-89.017	84.798	1638.4024	-1.9741	1.7876	-0.19434	NaN	NaN	NaN	NaN	NaN	NaN
3.254	35.4264	97.5023	947.245	-1.0551	0.63027	-0.097168	-72.899	-209.795	1382.309	-0.72803	0.65088	-0.20752	-117.4572	74.478	1652.0976	-1.9336	1.7051	-0.18213	NaN	NaN	NaN	NaN	NaN	NaN
3.256	-3.668	112.26	913.9876	-1.0263	0.61436	-0.096582	-56.746	-205.161	1406.721	-0.82129	0.67188	-0.2373	-124.145	93.631	1612.698	-1.8633	1.5801	-0.18896	NaN	NaN	NaN	NaN	NaN	NaN
3.258	-22.8467	124.218	872.5176	-0.99756	0.59424	-0.097168	-28.9592	-159.534	1413.1397	-0.91163	0.70899	-0.25928	-145.184	101.303	1610.916	-1.8239	1.51	-0.20337	NaN	NaN	NaN	NaN	NaN	NaN
3.26	10.186	130.01	867.7113	-0.96836	0.57832	-0.097265	-3.33	-186.975	1428.013	-1.0161	0.76416	-0.2666	-116.909	103.272	1589.32	-1.7788	1.4468	-0.21436	NaN	NaN	NaN	NaN	NaN	NaN
3.262	13.004	126.387	867.7201	-0.94326	0.55713	-0.10039	3.186	-146.076	1460.623	-1.1724	0.84619	-0.27539	-116.159	76.435	1585.597	-1.7339	1.3853	-0.20605	NaN	NaN	NaN	NaN	NaN	NaN
3.264	-8.593	123.6568	840.0471	-0.91553	0.53877	-0.098047	5.986	-141.502	1476.392	-1.2651	0.89111	-0.28076	-97.872	80.169	1539.9844	-1.7158	1.3594	-0.20557	NaN	NaN	NaN	NaN	NaN	NaN
3.266	-1.063	115.5278	797.3707	-0.88799	0.51943	-0.095899	11.174	-203.754	1490.4733	-1.4722	1.0161	-0.30371	-109.594	94.51616	1539.923	-1.6699	1.3281	-0.21631	NaN	NaN	NaN	NaN	NaN	NaN
3.268	22.53	105.306	777.4046	-0.86523	0.50195	-0.098633	-8.704	-179.204	1531.49	-1.6463	1.1302	-0.31397	-79.706	140.016	1507.959	-1.6159	1.299	-0.20605	NaN	NaN	NaN	NaN	NaN	NaN
3.27	3.946	120.153	766.513	-0.83809	0.48965	-0.093945	14.076	-225.051	1545.953	-1.8203	1.252	-0.33398	-52.3597	159.313	1502.588	-1.5503	1.2671	-0.20703	NaN	NaN	NaN	NaN	NaN	NaN
3.272	-4.818	117.396	743.7403	-0.81611	0.47236	-0.091894	7.633	-240.878	1575.862	-2.0684	1.4277	-0.35254	-69.313	215.927	1472.132	-1.4492	1.2188	-0.19873	NaN	NaN	NaN	NaN	NaN	NaN
3.274	-6.898	111.737	717.018	-0.79111	0.45713	-0.095801	-12.195	-180.986	1597.661	-2.1929	1.5142	-0.35791	-27.4737	206.296	1438.17	-1.3984	1.1914	-0.19531	NaN	NaN	NaN	NaN	NaN	NaN
3.276	-16.862	114.3743	708.5622	-0.76377	0.44297	-0.091211	-39.63	-193.5355	1622.456	-2.4155	1.6724	-0.375	36.6023	237.346	1357.2411	-1.312	1.1509	-0.19092	NaN	NaN	NaN	NaN	NaN	NaN
3.278	-26.1155	130.418	711.2998	-0.73828	0.42578	-0.088379	-19.216	-153.829	1654.609	-2.529	1.7775	-0.36792	54.2319	204.7458	1332.1273	-1.2578	1.1196	-0.18579	NaN	NaN	NaN	NaN	NaN	NaN
3.28	-37.60112	138.609	676.8803	-0.71084	0.41162	-0.088672	-16.293	-152.043	1652.113	-2.5	1.8789	-0.29883	82.411	237.7898	1305.901	-1.2085	1.0913	-0.17969	NaN	NaN	NaN	NaN	NaN	NaN
3.282	-41.01672	132.734	662.4017	-0.68438	0.4	-0.083984	-13.1	-191.47289	1639.858	-2.7383	1.9902	-0.37891	85.125	193.5803	1275.098	-1.1567	1.0649	-0.17529	NaN	NaN	NaN	NaN	NaN	NaN
3.284	-28.2805	129.799	641.4953	-0.65235	0.38633	-0.088281	-5.621	-156.6219	1614.734	-2.8042	2.0825	-0.42188	119.304	210.5043	1203.6747	-1.1304	1.0552	-0.16846	NaN	NaN	NaN	NaN	NaN	NaN
3.286	-22.7322	124.2324	613.3414	-0.62178	0.37129	-0.087109	-22.879	-155.25	1571.99	-2.8086	2.2012	-0.39063	96.897	140.6623	1183.246	-1.0874	1.0376	-0.16113	NaN	NaN	NaN	NaN	NaN	NaN
3.288	-39.9257	115.32046	571.8141	-0.5957	0.35645	-0.092285	-22.08	-137.539	1587.9065	-2.7827	2.2388	-0.31836	110.153	166.4186	1173.776	-1.0495	1.0198	-0.15625	NaN	NaN	NaN	NaN	NaN	NaN
3.29	-33.5386	110.1034	551.5434	-0.56367	0.34258	-0.091797	-56.551	-71.663	1581.895	-2.7573	2.2505	-0.29102	138.224	143.8528	1155.969	-1.0054	0.9917	-0.15381	NaN	NaN	NaN	NaN	NaN	NaN
3.292	-2.964	114.8917	545.5359012	-0.5333	0.32657	-0.091113	-49.422	-109.435	1571.0406	-2.6621	2.248	-0.27246	121.7	230.9601	1066.6073	-0.93555	0.93945	-0.1416	NaN	NaN	NaN	NaN	NaN	NaN
3.294	15.6548	123.1518	523.512	-0.50361	0.31562	-0.089551	-57.386	-76.821	1594.81752	-2.5459	2.2178	-0.25756	85.577	214.7089	999.984	-0.89844	0.9082	-0.14063	NaN	NaN	NaN	NaN	NaN	NaN
3.296	-5.991	121.4281	498.95053	-0.47539	0.29883	-0.090527	-66.0906	-41.615	1587.496	-2.4155	2.1626	-0.23926	45.137	246.8657	967.76	-0.82373	0.84521	-0.14209	NaN	NaN	NaN	NaN	NaN	NaN
3.298	20.003	118.3959	470.0867	-0.44141	0.28662	-0.087891	-64.6047	-59.258	1588.1948	-2.2305	2.043	-0.20459	56.725	196.55	941.311	-0.77515	0.79444	-0.14502	NaN	NaN	NaN	NaN	NaN	NaN
3.3	12.002	117.786	463.8127	-0.41191	0.27148	-0.09082	-70.0434	-0.353999999999999	1582.402	-2.1426	1.9688	-0.19336	77.175	278.574	905.7529	-0.73047	0.74219	-0.14453	NaN	NaN	NaN	NaN	NaN	NaN
3.302	18.205	131.679	446.923	-0.38369	0.25703	-0.089746	-106.786	-17.854	1562.066	-1.9766	1.8027	-0.16113	64.685	246.029	867.1818	-0.67432	0.68115	-0.146	NaN	NaN	NaN	NaN	NaN	NaN
3.304	3.507	130.502	422.378	-0.35205	0.24258	-0.09209	-92.6002	-68.68	1577.8	-1.8686	1.689	-0.14428	52.314	302.1218	845.45967	-0.65088	0.6499	-0.14453	NaN	NaN	NaN	NaN	NaN	NaN
3.306	21.2869	104.913	397.8924	-0.3208	0.2291	-0.089746	-76.1101	-47.405	1571.461	-1.7749	1.5864	-0.13818	13.8597	242.1296	811.55572	-0.60156	0.60156	-0.14111	NaN	NaN	NaN	NaN	NaN	NaN
3.308	23.4419	92.3452	379.5951	-0.2915	0.21729	-0.086426	-72.0755	-90.364	1572.02	-1.6665	1.4478	-0.10791	-30.191	309.452	734.033	-0.57348	0.5647	-0.13916	NaN	NaN	NaN	NaN	NaN	NaN
3.31	8.229	99.413	345.47306	-0.26181	0.21016	-0.094239	-42.891	-44.0854	1578.861	-1.6309	1.3906	-0.11035	-10.5984	273.757	673.808	-0.54004	0.53174	-0.13672	NaN	NaN	NaN	NaN	NaN	NaN
3.312	30.2509	106.6284	320.4142	-0.23486	0.1999	-0.091993	-47.668	7.679	1564.182	-1.5776	1.3228	-0.11572	-2.0154	324.444	619.524	-0.49414	0.48535	-0.13477	NaN	NaN	NaN	NaN	NaN	NaN
3.314	34.97432	101.6336	306.454	-0.20791	0.19092	-0.093555	-58.375	-5.607	1556.306	-1.5537	1.2793	-0.12964	-36.299	228.136	590.554	-0.46631	0.45947	-0.13525	NaN	NaN	NaN	NaN	NaN	NaN
3.316	34.684	97.82642	301.188	-0.17734	0.18438	-0.093945	-33.756	49.73	1519.98818	-1.5293	1.2402	-0.13721	-80.431	267.583	554.009	-0.39795	0.41162	-0.12598	NaN	NaN	NaN	NaN	NaN	NaN
3.318	26.9963	88.49607	268.80776	-0.15479	0.17529	-0.09375	-50.239	31.6019	1507.2138	-1.5054	1.1899	-0.14355	-63.05	209.889	511.945	-0.32666	0.35889	-0.13232	NaN	NaN	NaN	NaN	NaN	NaN
3.32	36.34019	74.99746	251.26678	-0.13135	0.1624	-0.094922	-37.884	8.13093	1509.992	-1.5015	1.1675	-0.146	-79.963	268.029	494.2673	-0.2876	0.33252	-0.13086	NaN	NaN	NaN	NaN	NaN	NaN
3.322	19.314	70.66873	257.9715	-0.10732	0.15127	-0.098243	-32.815	78.168	1489.2306	-1.4727	1.1367	-0.14551	-37.863	178.131	483.918	-0.21484	0.27734	-0.13086	NaN	NaN	NaN	NaN	NaN	NaN
3.324	-1.537	79.8752	249.611	-0.081543	0.14033	-0.098633	-40.004	65.958	1479.582	-1.4519	1.1218	-0.15112	-21.6087	208.8198	460.882	-0.15966	0.23462	-0.12915	NaN	NaN	NaN	NaN	NaN	NaN
3.326	3.599	81.7072	223.0731	-0.06377	0.12793	-0.10322	-62.64	113.451	1475.821	-1.4238	1.1074	-0.15332	16.5144	157.71	398.706	-0.10449	0.18506	-0.12842	NaN	NaN	NaN	NaN	NaN	NaN
3.328	-18.2043	75.4507	213.6939	-0.042969	0.11426	-0.10352	-36.3259	150.769	1426.3278	-1.3789	1.0801	-0.16113	16.4016	201.61	347.8861	-0.039551	0.12891	-0.13867	NaN	NaN	NaN	NaN	NaN	NaN
3.33	-19.39006	70.7452	187.3699	-0.024121	0.10059	-0.10498	3.907	102.0528	1408.933	-1.3604	1.0625	-0.15918	39.516	145.1014	299.78139	-0.0097656	0.09668	-0.14404	NaN	NaN	NaN	NaN	NaN	NaN
3.332	-11.4113	60.4841	188.2701	-0.0039063	0.08916	-0.10928	2.082	146.482	1389.574	-1.3184	1.0283	-0.16504	56.944	151.827	276.007	0.043945	0.041016	-0.15137	NaN	NaN	NaN	NaN	NaN	NaN
3.334	-9.0745	62.9587	155.0331	0.0093746	0.074707	-0.11865	9.429	123.1059	1384.794	-1.2858	1.0041	-0.16504	73.34	85.2149	224.407	0.06958	0.010254	-0.1543	NaN	NaN	NaN	NaN	NaN	NaN
3.336	-8.6735	51.5238	151.327	0.027246	0.06875	-0.10996	24.4332	106.58	1371.6739	-1.2598	0.97266	-0.16748	47.3588	115.705	171.7675	0.087891	-0.021973	-0.15527	NaN	NaN	NaN	NaN	NaN	NaN
3.338	0.632	50.475	139.4615	0.037109	0.058105	-0.11523	15.5637	133.716	1318.164	-1.2202	0.93994	-0.16943	59.919	67.4552	135.801	0.089355	-0.055176	-0.16162	NaN	NaN	NaN	NaN	NaN	NaN
3.34	13.52	37.559	136.2254	0.050683	0.049414	-0.11357	-8.672	69.966	1278.329	-1.1978	0.91943	-0.17041	67.763	96.812	139.0889	0.086914	-0.060547	-0.1499	NaN	NaN	NaN	NaN	NaN	NaN
3.342	-20.926	34.16	123.1984	0.062891	0.039942	-0.10948	18.911	110.794	1262.104	-1.145	0.88037	-0.16846	63.151	53.6416	128.942	0.058105	-0.084961	-0.15039	NaN	NaN	NaN	NaN	NaN	NaN
3.344	6.8497	22.858	124.7556	0.069922	0.033691	-0.11064	-6.387	162.96529	1230.5553	-1.1062	0.85181	-0.17163	47.331	79.9093	84.906	0.027588	-0.085206	-0.15112	NaN	NaN	NaN	NaN	NaN	NaN
3.346	10.9801	32.8511	132.513	0.073047	0.026172	-0.11015	-20.1658	149.2254	1235.385	-1.0698	0.82275	-0.17334	90.044	50.8027	33.3527	-0.0029297	-0.078125	-0.15771	NaN	NaN	NaN	NaN	NaN	NaN
3.348	3.334	49.7056	118.736	0.074219	0.017578	-0.10596	0.902299999999999	202.811	1208.843	-1.021	0.79053	-0.17529	88.982	76.0203	28.274	-0.044922	-0.061035	-0.15723	NaN	NaN	NaN	NaN	NaN	NaN
3.35	-10.443	50.258	92.0275	0.074609	0.010742	-0.1045	-25.655	163.968	1176.6642	-0.99365	0.77393	-0.17383	81.595	43.506	13.239	-0.062988	-0.049316	-0.15625	NaN	NaN	NaN	NaN	NaN	NaN
3.352	2.69	50.798	76.8716	0.07207	0.0083985	-0.09873	1.5331	147.1361	1155.578	-0.94141	0.73828	-0.1709	55.5507	61.8215	30.7652	-0.10938	-0.021973	-0.16064	NaN	NaN	NaN	NaN	NaN	NaN
3.354	12.8371	36.738	84.2211	0.069336	0.002539	-0.093261	7.5344	178.53	1093.983	-0.90234	0.71289	-0.16455	57.29328	25.486	16.81664	-0.14087	0.00073245	-0.15967	NaN	NaN	NaN	NaN	NaN	NaN
3.356	8.92	35.4544	74.00928	0.059375	0.0024414	-0.084473	-5.219	138.522	1062.684	-0.86572	0.68799	-0.16406	-5.485	13.696	16.5516	-0.16797	0.028809	-0.16699	NaN	NaN	NaN	NaN	NaN	NaN
3.358	31.8598	32.1767	67.3248	0.055664	0.0063477	-0.08252	7.514	179.664	1025.295	-0.8125	0.65332	-0.16211	-14.5018	-16.6045	9.7391	-0.20117	0.060547	-0.17285	NaN	NaN	NaN	NaN	NaN	NaN
3.36	34.2545	22.781	59.6531	0.041407	0.0023437	-0.069726	16.4749	194.7049	978.578	-0.78223	0.63477	-0.1582	-71.1257	-13.5859	25.7	-0.21436	0.07666	-0.17725	NaN	NaN	NaN	NaN	NaN	NaN
3.362	34.3355	26.157	69.9328	0.036621	0.0032227	-0.064844	3.868	153.9178	970.7602	-0.72607	0.59912	-0.14844	-68.663	16.5515	-19.85796	-0.23193	0.10498	-0.18115	NaN	NaN	NaN	NaN	NaN	NaN
3.364	21.921	41.9712	39.82513	0.026465	0.002832	-0.05625	28.619	194.6432	936.6011	-0.69018	0.57007	-0.14551	-71.2323	36.959	-24.6157	-0.24121	0.11963	-0.18579	NaN	NaN	NaN	NaN	NaN	NaN
3.366	36.7914	32.6955	32.4296	0.025879	0.0044922	-0.047851	17.783	175.20336	904.4661	-0.64697	0.53906	-0.14355	-53.7595	39.5435	-46.22	-0.25	0.13379	-0.18945	NaN	NaN	NaN	NaN	NaN	NaN
3.368	35.6378	39.0428	39.1571	0.02002	0.0043945	-0.038086	-0.2035	170.5294	879.9564	-0.5957	0.5	-0.14209	-78.9059	10.812	-8.385	-0.25879	0.14063	-0.19238	NaN	NaN	NaN	NaN	NaN	NaN
3.37	15.4279	38.37	32.7166	0.013183	0.0026367	-0.032031	17.5384	217.0282	822.2775	-0.56982	0.48096	-0.14063	-77.1119	26.6168	-4.382	-0.26855	0.14355	-0.19287	NaN	NaN	NaN	NaN	NaN	NaN
3.372	-5.779	30.1751	16.7644	0.0098634	-0.0010742	-0.027246	13.9732	182.6085	795.6849	-0.51025	0.44141	-0.14111	-73.1895	21.715	25.668	-0.28076	0.15771	-0.19531	NaN	NaN	NaN	NaN	NaN	NaN
3.374	10.2713	22.7827	30.0381	0.010644	-0.003418	-0.025683	37.2136	187.5471	770.7184	-0.46826	0.40478	-0.13794	-47.5192	63.24799	26.9747	-0.30761	0.1687	-0.18994	NaN	NaN	NaN	NaN	NaN	NaN
3.376	12.5863	7.5658	48.8798	0.009668	-0.0091795	-0.021973	48.73	182.1368	729.49681	-0.42139	0.37549	-0.13672	-42.5902	36.576	49.822	-0.33203	0.18262	-0.18945	NaN	NaN	NaN	NaN	NaN	NaN
3.378	-15.9404	11.0768	41.3819	0.0058594	-0.01123	-0.021484	33.0787	145.488	715.114	-0.36621	0.33057	-0.13232	-86.606	77.116	14.7896	-0.36865	0.19629	-0.17969	NaN	NaN	NaN	NaN	NaN	NaN
3.38	2.244	25.5667	6.9063	0.0072266	-0.015527	-0.019141	58.273	191.778	661.49	-0.33789	0.31006	-0.13135	-89.242	41.5551	5.4073	-0.38965	0.2085	-0.1748	NaN	NaN	NaN	NaN	NaN	NaN
3.382	-9.866	23.026	-1.0822	0.011816	-0.021485	-0.017871	25.3692	179.8389	612.29082	-0.27686	0.27148	-0.13135	-46.6258	90.606	-24.0466	-0.42969	0.23047	-0.16064	NaN	NaN	NaN	NaN	NaN	NaN
3.384	2.522	33.0545	16.56848	0.010254	-0.028516	-0.019043	34.1064	166.981	570.805	-0.22974	0.24365	-0.13403	-27.873	36.472	23.2124	-0.44532	0.24756	-0.14551	NaN	NaN	NaN	NaN	NaN	NaN
3.386	-15.177	16.9357	14.99514	0.011133	-0.036425	-0.020605	41.784	179.9563	509.376	-0.18506	0.20801	-0.13525	-3.32	56.341	37.1435	-0.45703	0.26172	-0.12988	NaN	NaN	NaN	NaN	NaN	NaN
3.388	-21.3731	16.7764	3.8424	0.013184	-0.045898	-0.026367	22.514431	125.249	470.5134	-0.12793	0.16406	-0.12793	3.217	-1.49	47.9874	-0.44971	0.27637	-0.10742	NaN	NaN	NaN	NaN	NaN	NaN
3.39	7.2843	5.5614	25.0108	0.010644	-0.054004	-0.029395	38.275	136.9282	431.3544	-0.10107	0.15088	-0.125	29.5899	28.9753	5.595	-0.43994	0.28223	-0.099609	NaN	NaN	NaN	NaN	NaN	NaN
3.392	-13.7535	3.9856	31.32653	0.012988	-0.060938	-0.034766	34.43	147.694	403.4225	-0.050293	0.10303	-0.12354	54.74	-29.40433	26.8328	-0.4043	0.2793	-0.072754	NaN	NaN	NaN	NaN	NaN	NaN
3.394	-21.7061	19.8489	19.7659	0.017675	-0.067187	-0.035547	18.5541	147.779	386.954	-0.01709	0.074952	-0.12646	57.3758	11.005	51.238	-0.36328	0.26953	-0.060303	NaN	NaN	NaN	NaN	NaN	NaN
3.396	-33.4922	18.7648	8.9653	0.023145	-0.073437	-0.038281	43.025	197.263	354.6182	0.01123	0.046387	-0.12451	57.6108	-36.969	74.604	-0.31836	0.25537	-0.052246	NaN	NaN	NaN	NaN	NaN	NaN
3.398	10.444	12.8592	15.1367	0.031738	-0.077637	-0.047363	15.7665	156.396	309.7532	0.044922	0.0097656	-0.12158	82.1362	33.0901	24.54136	-0.24219	0.21582	-0.041992	NaN	NaN	NaN	NaN	NaN	NaN
3.4	-6.59	11.7222	16.4112	0.036231	-0.084766	-0.049902	15.893	134.45016	291.2241	0.055664	-0.0087891	-0.12305	73.679	-16.37386	12.3446	-0.20068	0.19189	-0.032715	NaN	NaN	NaN	NaN	NaN	NaN
3.402	-30.16175	14.3801	-3.9213	0.043555	-0.086426	-0.058496	24.1707	150.9775	239.1684	0.072266	-0.039063	-0.11865	54.07243	33.0038	9.46578	-0.12012	0.13867	-0.021973	NaN	NaN	NaN	NaN	NaN	NaN
3.404	19.8247	11.8077	4.86147	0.042773	-0.092285	-0.059668	-8.4576	93.183	221.192	0.078125	-0.058594	-0.11743	25.5551	-22.544	32.99	-0.0625	0.098878	-0.013672	NaN	NaN	NaN	NaN	NaN	NaN
3.406	18.0615	1.76221	14.5234	0.052637	-0.094531	-0.066797	39.637	111.641	210.7765	0.078613	-0.074219	-0.11768	18.014	30.303	35.428	-0.015137	0.055176	-0.0078125	NaN	NaN	NaN	NaN	NaN	NaN
3.408	4.971	10.691	20.7195	0.057617	-0.09375	-0.073242	-4.2661	99.9086	169.54824	0.068848	-0.087402	-0.11377	18.6416	-15.8973	17.0411	0.058105	-0.0014648	-0.003418	NaN	NaN	NaN	NaN	NaN	NaN
3.41	11.013	18.1363	0.2908	0.064551	-0.095899	-0.073926	-8.725	73.9594	147.9427	0.063965	-0.094238	-0.11035	9.39	10.528	-1.3093	0.092773	-0.033691	0.0029297	NaN	NaN	NaN	NaN	NaN	NaN
3.412	42.8315	15.5023	12.3579	0.073633	-0.091992	-0.089063	22.1035	114.139	121.0456	0.040527	-0.104	-0.11475	-11.7173	-54.25981	22.2957	0.16211	-0.088379	0.015625	NaN	NaN	NaN	NaN	NaN	NaN
3.414	28.9552	5.0494	48.0627	0.081055	-0.086523	-0.095312	-16.6483	89.931	118.0928	0.028077	-0.10206	-0.11474	-33.261	5.4755	-4.2408	0.20386	-0.13452	0.017579	NaN	NaN	NaN	NaN	NaN	NaN
3.416	11.6715	-11.6293	64.5205	0.08418	-0.087305	-0.099901	1.9877	76.91911	138.918	0.013184	-0.1001	-0.1167	-36.9114	-6.025	-17.7417	0.24902	-0.16846	0.012695	NaN	NaN	NaN	NaN	NaN	NaN
3.418	15.0981	-25.19	49.12856	0.087402	-0.078613	-0.11182	22.936	72.939	126.544	-0.003418	-0.088867	-0.1167	-26.121	52.838	-39.915	0.29541	-0.21143	0.0029297	NaN	NaN	NaN	NaN	NaN	NaN
3.42	19.2109	-33.61	77.494	0.085254	-0.077149	-0.12314	-11.8734	33.273	123.178	-0.010742	-0.080566	-0.11865	-49.114	-7.984	-22.755	0.31787	-0.22754	0.003418	NaN	NaN	NaN	NaN	NaN	NaN
3.422	22.465	-26.787	94.843	0.083887	-0.066211	-0.129	13.49462	45.029	95.7722	-0.024414	-0.071289	-0.11865	-73.2263	29.218	1.978	0.354	-0.25635	0.0019531	NaN	NaN	NaN	NaN	NaN	NaN
3.424	1.385	-15.21	139.87788	0.070606	-0.054492	-0.13447	16.5406	40.5945	60.6575	-0.030762	-0.058594	-0.12061	-61.0377	-5.201	5.991	0.36084	-0.27906	0.0029297	NaN	NaN	NaN	NaN	NaN	NaN
3.426	23.4861	0.733000000000001	175.631	0.046191	-0.044238	-0.13838	-5.246	42.549	45.708	-0.032715	-0.056641	-0.12354	-73.2274	44.823	2.937	0.35742	-0.29199	-0.0039063	NaN	NaN	NaN	NaN	NaN	NaN
3.428	51.896	3.8833	256.92	0.015137	-0.037109	-0.14844	22.3762	63.2869	22.7139	-0.037109	-0.042969	-0.12305	-74.505	1.4073	20.8026	0.34229	-0.30029	-0.0087891	NaN	NaN	NaN	NaN	NaN	NaN
3.43	67.7772	15.1779	353.07	-0.025586	-0.025879	-0.16455	15.5486	40.3752	13.5383	-0.041504	-0.039551	-0.12427	-93.077	23.1017	19.1377	0.3335	-0.30273	-0.010254	NaN	NaN	NaN	NaN	NaN	NaN
3.432	70.33863	23.055	448.778	-0.076073	-0.015234	-0.17735	8.7627	12.2821	42.5787	-0.043945	-0.032715	-0.12207	-94.887	10.3547	-8.4698	0.30908	-0.30566	-0.01123	NaN	NaN	NaN	NaN	NaN	NaN
3.434	82.7514	28.3989	558.0588	-0.14639	-4e-08	-0.19297	45.359	1.9867	35.6657	-0.052246	-0.030273	-0.11719	-57.3678	65.007	-18.565	0.281	-0.29395	-0.013184	NaN	NaN	NaN	NaN	NaN	NaN
3.436	62.043	1.322	618.1024	-0.22764	0.021777	-0.20703	20.2811	-18.4084	26.8663	-0.061523	-0.025391	-0.11719	-30.6376	52.569	-10.7557	0.25488	-0.28369	-0.016602	NaN	NaN	NaN	NaN	NaN	NaN
3.438	-0.952	-13.445	666.044	-0.33545	0.05127	-0.2124	27.0446	-7.6332	18.5399	-0.078125	-0.02002	-0.11035	-17.99	55.642	0.335000000000001	0.22363	-0.26514	-0.02002	NaN	NaN	NaN	NaN	NaN	NaN
3.44	-2.937	-16.591	737.121	-0.47285	0.096389	-0.22441	19.5652	7.288	-2.6572	-0.097902	-0.011231	-0.10425	-19.912	31.9772	17.4215	0.20801	-0.25146	-0.020996	NaN	NaN	NaN	NaN	NaN	NaN
3.442	-35.313	1.52	794.178	-0.63516	0.15273	-0.22812	-7.335	-2.8148	7.8951	-0.11768	-0.0043945	-0.097656	6.08	47.4563	-4.511	0.18018	-0.23193	-0.026855	NaN	NaN	NaN	NaN	NaN	NaN
3.444	-36.732	26.42206	848.741	-0.81094	0.22265	-0.23164	35.4639	9.0543	3.922	-0.13818	0.012695	-0.090332	45.2545	43.799	-4.745	0.16504	-0.21436	-0.03125	NaN	NaN	NaN	NaN	NaN	NaN
3.446	-91.199	18.0655	861.349	-1.0109	0.31709	-0.23017	12.5024	-8.4056	-11.952268	-0.14209	0.020996	-0.087402	55.672	38.177	32.9273	0.15332	-0.20508	-0.035156	NaN	NaN	NaN	NaN	NaN	NaN
3.448	-103.3779	-11.1	854.7469	-1.2227	0.42773	-0.22559	7.3503	-10.7753	9.8697	-0.14795	0.040039	-0.076172	43.8247	40.5933	58.174	0.14355	-0.18994	-0.04248	NaN	NaN	NaN	NaN	NaN	NaN
3.45	-98.864	-44.638	908.333	-1.4461	0.55078	-0.22344	35.244	2.824	6.0785	-0.13769	0.049316	-0.067627	32.854	34.959	52.668	0.13916	-0.18579	-0.043213	NaN	NaN	NaN	NaN	NaN	NaN
3.452	-81.455	-59.351	915.626	-1.6645	0.67422	-0.22832	5.867	-18.5921	-1.9856	-0.12988	0.058105	-0.05957	53.747	45.58	16.5936	0.13965	-0.1792	-0.049805	NaN	NaN	NaN	NaN	NaN	NaN
3.454	-42.086	-62.476	906.681	-1.8629	0.80156	-0.23106	19.1724	-11.2354	2.26958	-0.10986	0.065918	-0.045898	47.3312	17.43485	37.2023	0.14014	-0.16309	-0.052246	NaN	NaN	NaN	NaN	NaN	NaN
3.456	-30.058	-44.3415	891.444	-2.0243	0.92725	-0.22735	-1.996	-10.1544	-25.72068	-0.098633	0.065918	-0.041016	36.7262	16.2369	41.573	0.13428	-0.15967	-0.04834	NaN	NaN	NaN	NaN	NaN	NaN
3.458	-17.388	-9.391	912.833	-2.1323	1.063	-0.21338	-2.2218	-17.1323	-0.56171	-0.079102	0.061523	-0.028809	33.373	-10.507	51.462	0.12354	-0.1377	-0.060547	NaN	NaN	NaN	NaN	NaN	NaN
3.46	-53.0198	12.807	920.1133	-2.1926	1.2231	-0.18506	24.29341	6.9816	4.9082	-0.054199	0.057861	-0.023926	45.2903	5.2733	27.5935	0.1101	-0.12866	-0.062012	NaN	NaN	NaN	NaN	NaN	NaN
3.462	-54.4231	10.792	889.256	-2.2176	1.3914	-0.1584	-29.45359	15.0117	-5.9846	-0.034668	0.048828	-0.017578	35.7253	-34.675	6.75891	0.1001	-0.10986	-0.062012	NaN	NaN	NaN	NaN	NaN	NaN
3.464	-45.7575	-20.403	875.532	-2.2121	1.5266	-0.15957	-31.0025	13.2412	4.947	-0.0083008	0.039551	-0.0083008	11.889	-21.932	18.7384	0.084961	-0.080566	-0.069824	NaN	NaN	NaN	NaN	NaN	NaN
3.466	-50.578	-47.3083	878.8769	-2.1536	1.5862	-0.19737	6.382	22.883875	-4.6888	0.0043945	0.032227	-0.0039063	-4.268	-47.141	52.485	0.077637	-0.065918	-0.082031	NaN	NaN	NaN	NaN	NaN	NaN
3.468	-74.26178	-78.2511	903.183	-2.0405	1.5571	-0.25	-21.9587	7.8331	-16.2539	0.03125	0.012207	0	-15.619	17.30854	19.9761	0.063965	-0.041992	-0.078613	NaN	NaN	NaN	NaN	NaN	NaN
3.47	-86.4383	-95.63583	881.7224	-1.8648	1.4465	-0.29531	19.582	1.8322	0.3488	0.049316	-0.0046387	0.0073244	-8.639	5.739	11.72233	0.052246	-0.020996	-0.085205	NaN	NaN	NaN	NaN	NaN	NaN
3.472	-33.7974	-108.9846	870.4915	-1.6682	1.3072	-0.34111	-2.8238	2.8251	-19.6078	0.071777	-0.023438	0.01123	-35.0435	51.51	-2.9142	0.044922	0.003418	-0.090332	NaN	NaN	NaN	NaN	NaN	NaN
3.474	-12.5968	-132.68754	883.2787	-1.4605	1.1524	-0.37744	-23.3575	-7.164	4.8575	0.088867	-0.043945	0.013184	-71.72	-13.142	16.0312	0.026855	0.034668	-0.09375	NaN	NaN	NaN	NaN	NaN	NaN
3.476	24.692	-145.681	901.0096	-1.2696	1.0056	-0.39111	35.3011	22.598	19.4604	0.099609	-0.057617	0.012207	-93.3347	34.1757	5.7842	0.02002	0.044922	-0.091309	NaN	NaN	NaN	NaN	NaN	NaN
3.478	47.198	-167.297	913.289	-1.1167	0.88818	-0.40137	-10.433	26.1315	-13.7459	0.12305	-0.085938	0.012207	-60.9259	-18.903	-2.9956	-0.0073242	0.064453	-0.098145	NaN	NaN	NaN	NaN	NaN	NaN
3.48	56.304	-163.679	941.079	-1.0145	0.80479	-0.41494	3.897	22.2382	4.211	0.1333	-0.10107	0.014648	-68.3945	17.3422	-29.139	-0.030517	0.082032	-0.099611	NaN	NaN	NaN	NaN	NaN	NaN
3.482	71.886	-167.613	993.6928	-0.93242	0.76211	-0.42656	30.1389	36.3579	-1.6818	0.14697	-0.11963	0.012207	-74.516	-39.58	6.8702	-0.04834	0.097168	-0.10303	NaN	NaN	NaN	NaN	NaN	NaN
3.484	56.016	-165.768	1016.78	-0.86211	0.73164	-0.43985	-19.78083	20.0195	2.6024	0.15527	-0.14258	0.0083008	-83.8666	9.407677	-15.3941	-0.07666	0.11816	-0.10791	NaN	NaN	NaN	NaN	NaN	NaN
3.486	81.269	-158.3451	1001.578	-0.79844	0.70664	-0.45605	26.3368	12.0667	24.6526	0.15967	-0.15381	0.0087891	-67.341	-6.091	-8.177	-0.084473	0.12598	-0.11084	NaN	NaN	NaN	NaN	NaN	NaN
3.488	64.812	-152.0771	1003.4333	-0.74121	0.68066	-0.4585	11.0143	-10.86186	13.971	0.15918	-0.16748	0.0014648	-29.324	47.6297	19.044	-0.095703	0.14795	-0.11768	NaN	NaN	NaN	NaN	NaN	NaN
3.49	71.174	-136.802	1022.81881	-0.69257	0.64707	-0.45938	3.268	-26.9451	13.8657	0.16381	-0.177	-0.00024415	-44.1267	-33.704	97.563	-0.094971	0.1543	-0.12329	NaN	NaN	NaN	NaN	NaN	NaN
3.492	38.116	-123.132	1064.9005	-0.65859	0.61025	-0.45615	48.2256	1.7648	7.8515	0.1626	-0.18359	-0.0024414	-26.58	44.94287	170.684	-0.089844	0.15771	-0.13428	NaN	NaN	NaN	NaN	NaN	NaN
3.494	48.538	-127.548	1089.391	-0.64687	0.58369	-0.44248	13.221	31.498	-7.0328	0.16016	-0.18359	-0.010254	28.956	45.3757	245.171	-0.09082	0.1665	-0.16016	NaN	NaN	NaN	NaN	NaN	NaN
3.496	66.971	-130.912	1119.518	-0.65098	0.57207	-0.42558	16.2822	47.098	8.9451	0.15674	-0.18848	-0.011719	31.8142	107.258	365.723	-0.09375	0.17334	-0.16797	NaN	NaN	NaN	NaN	NaN	NaN
3.498	73.055	-133.308	1148.9975	-0.67627	0.57666	-0.40283	36.1256	50.12	4.0237	0.15576	-0.19141	-0.021484	41.1949	73.367	573.157	-0.13672	0.20703	-0.19434	NaN	NaN	NaN	NaN	NaN	NaN
3.5	93.699	-138.654	1163.0088	-0.71221	0.58877	-0.38467	5.0323	22.9907	15.0447	0.15185	-0.19165	-0.026123	21.2811	135.377	775.402	-0.20264	0.2312	-0.20996	NaN	NaN	NaN	NaN	NaN	NaN
3.502	60.943	-138.197	1176.357	-0.74922	0.6125	-0.36914	25.0868	-9.5091	34.382	0.15088	-0.19482	-0.033691	97.531	59.555	978.641	-0.28906	0.26367	-0.22852	NaN	NaN	NaN	NaN	NaN	NaN
3.504	53.618	-121.935	1209.8066	-0.78515	0.64141	-0.3582	17.8785	-16.8964	15.3352	0.14697	-0.19287	-0.044434	111.13	65.803	1152.349	-0.4541	0.32324	-0.25781	NaN	NaN	NaN	NaN	NaN	NaN
3.506	34.024	-151.5939	1253.771	-0.80713	0.66084	-0.35947	2.022	-19.6353	28.674	0.14844	-0.1875	-0.048828	122.649	-15.877	1355.472	-0.56006	0.36914	-0.2749	NaN	NaN	NaN	NaN	NaN	NaN
3.508	32.115	-159.733	1287.705	-0.82422	0.67188	-0.37402	14.957	-4.27112	24.70305	0.15186	-0.18115	-0.053711	67.047	-25.642	1528.348	-0.80078	0.48242	-0.32617	NaN	NaN	NaN	NaN	NaN	NaN
3.51	6.9174	-160.005	1298.8034	-0.83262	0.68027	-0.37939	-32.7039	10.264	-10.7657	0.14819	-0.17749	-0.068115	33.3308	-75.946	1625.441	-1.0176	0.60743	-0.36231	NaN	NaN	NaN	NaN	NaN	NaN
3.512	-9.3842	-138.933	1321.772	-0.84766	0.67871	-0.39453	19.9945	11.4362	-2.1124	0.14258	-0.17578	-0.075195	-6.34399999999999	-72.141	1650.07	-1.269	0.75635	-0.39111	NaN	NaN	NaN	NaN	NaN	NaN
3.514	14.134032	-118.60635	1352.636	-0.88008	0.67871	-0.39687	29.937	17.3666	9.1802	0.13867	-0.16211	-0.088867	-26.785	-156.271	1633.801	-1.6519	0.99072	-0.40967	NaN	NaN	NaN	NaN	NaN	NaN
3.516	-17.8568	-115.4491	1358.6425	-0.93662	0.68096	-0.39737	-37.1301	-9.8576	9.8628	0.13379	-0.16016	-0.09375	-68.442	-216.251	1635.882	-1.8608	1.1274	-0.39404	NaN	NaN	NaN	NaN	NaN	NaN
3.518	2.4154	-106.415	1339.6117	-1.0137	0.68945	-0.38916	-1.216	-22.6004	39.391	0.11963	-0.14453	-0.10693	-117.672	-288.37	1614.05	-2.2988	1.4219	-0.31689	NaN	NaN	NaN	NaN	NaN	NaN
3.52	7.196	-122.46011	1360.0735	-1.1064	0.71514	-0.39072	8.555	-10.7883	11.8065	0.11425	-0.13135	-0.11401	-143.725	-331.44	1558.229	-2.6423	1.678	-0.22558	NaN	NaN	NaN	NaN	NaN	NaN
3.522	45.609	-119.705	1372.121	-1.2109	0.75391	-0.39941	-21.6004	-24.8913	14.9482	0.10059	-0.11816	-0.11719	-143.788	-340.7	1477.745	-2.9976	1.9692	-0.14746	NaN	NaN	NaN	NaN	NaN	NaN
3.524	25.044	-122.731	1392.3651	-1.3129	0.80664	-0.41465	6.662	-8.871	24.2827	0.08252	-0.09668	-0.125	-178.344	-333.23	1403.634	-3.4082	2.3594	-0.12646	NaN	NaN	NaN	NaN	NaN	NaN
3.526	16.8925	-107.533	1371.7494	-1.4206	0.86768	-0.42412	-17.6058	-0.0806	-2.7168	0.076172	-0.09082	-0.12646	-166.381	-275	1339.383	-3.5269	2.5142	-0.13379	NaN	NaN	NaN	NaN	NaN	NaN
3.528	37.804	-81.5599	1373.72755	-1.5322	0.94141	-0.44434	8.045	-3.0141	4.11262	0.06543	-0.065918	-0.13623	-162.211	-228.8394	1272.944	-3.4761	2.6099	-0.2124	NaN	NaN	NaN	NaN	NaN	NaN
3.53	37.3797	-60.109	1361.4654	-1.6517	1.0349	-0.46836	17.74948	15.1851	-7.1331	0.051758	-0.041504	-0.13623	-180.619	-127.674	1224.443	-3.1003	2.4582	-0.27466	NaN	NaN	NaN	NaN	NaN	NaN
3.532	54.4901	-51.532	1377.8756	-1.7768	1.1419	-0.48565	-32.2864	12.59878	-14.1871	0.038086	-0.023438	-0.14063	-236.777	-146.25	1240.463	-2.7695	2.2266	-0.51807	NaN	NaN	NaN	NaN	NaN	NaN
3.534	28.1873	-44.823	1399.22788	-1.9081	1.2528	-0.49814	28.3538	-1.6523	15.66264	0.025879	-0.003418	-0.1499	-219.033	-132.54	1264.014	-2.0444	1.7817	-0.646	NaN	NaN	NaN	NaN	NaN	NaN
3.536	67.75	-56.45	1420.0057	-2.0331	1.3599	-0.50273	28.6273	-7.34524	-11.8513	0.01709	0.0029297	-0.15771	-227.489	-202.945	1304.3073	-1.6733	1.5298	-0.61279	NaN	NaN	NaN	NaN	NaN	NaN
3.538	82.362	-64.0182	1431.6587	-2.1484	1.457	-0.50977	-8.782	-29.23921	-20.542	-0.00097656	0.01709	-0.16992	-226.358	-170.934	1256.791	-1.1733	1.1343	-0.57471	NaN	NaN	NaN	NaN	NaN	NaN
3.54	84.117	-70.6773	1430.24322	-2.2289	1.5336	-0.51367	41.183	-21.791	-13.6954	-0.010986	0.025391	-0.18604	-165.945	-243.101	1254.128	-0.98683	1.0024	-0.62207	NaN	NaN	NaN	NaN	NaN	NaN
3.542	92.095	-74.691	1447.885	-2.2699	1.5883	-0.51641	-2.93151	1.85425	-16.9072	-0.025879	0.040527	-0.19531	-160.388	-252.67	1246.238	-0.84521	0.93018	-0.67725	NaN	NaN	NaN	NaN	NaN	NaN
3.544	94.501	-65.458	1459.342	-2.2652	1.6101	-0.52226	6.9099	-3.981	49.637	-0.064453	0.066406	-0.19824	-148.828	-354.907	1296.574	-0.64893	0.84814	-0.72803	NaN	NaN	NaN	NaN	NaN	NaN
3.546	123.969	-59.4401	1449.503	-2.224	1.6071	-0.52383	47.1515	-13.154	68.191	-0.093262	0.077637	-0.2041	-86.2233	-379.913	1334.807	-0.52539	0.79492	-0.73438	NaN	NaN	NaN	NaN	NaN	NaN
3.548	98.75	-48.4475	1435.1969	-2.1616	1.5845	-0.52588	-14.1033	-25.082	87.599	-0.16992	0.10742	-0.23047	-16.892	-473.26	1386.785	-0.2749	0.6499	-0.72412	NaN	NaN	NaN	NaN	NaN	NaN
3.55	111	-42.5506	1448.597	-2.0998	1.5545	-0.52715	55.634	-16.96	153.6162	-0.25122	0.14478	-0.24902	6.151	-458.68	1431.951	-0.10327	0.55054	-0.70679	NaN	NaN	NaN	NaN	NaN	NaN
3.552	87.363	-46.853	1463.1808	-2.0487	1.5259	-0.53145	54.853	15.6301	195.736	-0.34375	0.18945	-0.27246	46.798	-473.64	1531.68	0.027832	0.44531	-0.69922	NaN	NaN	NaN	NaN	NaN	NaN
3.554	75.738	-38.1996	1460.8935	-2.005	1.4985	-0.52989	2.2855	1.3921	314.2	-0.50586	0.26318	-0.2998	44.384	-397.799	1570.029	0.10693	0.34229	-0.69092	NaN	NaN	NaN	NaN	NaN	NaN
3.556	82.913	-38.2945	1437.34331	-1.9625	1.4703	-0.52012	50.219	22.8421	449.552	-0.60352	0.30859	-0.30908	39.2122	-376.611	1582.421	0.10107	0.30908	-0.68311	NaN	NaN	NaN	NaN	NaN	NaN
3.558	64.5	-31.2069	1451.921	-1.9297	1.4492	-0.51123	17.92	68.39423	586.572	-0.84375	0.42773	-0.33203	57.6574	-287.703	1563.9511	0.0043945	0.30371	-0.6543	NaN	NaN	NaN	NaN	NaN	NaN
3.56	64.302	-14.4262	1443.789	-1.8933	1.4263	-0.49854	54.095	51.684	797.142	-1.1558	0.58545	-0.34717	95.166	-278.688	1575.1541	-0.15649	0.36596	-0.6272	NaN	NaN	NaN	NaN	NaN	NaN
3.562	56.013	5.491	1443.412	-1.8483	1.3973	-0.49482	56.306	38.774	931.777	-1.3369	0.68066	-0.3418	108.877	-200.336	1591.9303	-0.36865	0.46924	-0.61377	NaN	NaN	NaN	NaN	NaN	NaN
3.564	56.671	30.955	1413.9009	-1.8027	1.3634	-0.48506	29.727	17.735	1044.858	-1.7285	0.89844	-0.31445	141.532	-186.798	1604.2961	-0.71045	0.66064	-0.60889	NaN	NaN	NaN	NaN	NaN	NaN
3.566	28.70905	15.7609	1405.7746	-1.7554	1.3266	-0.47246	37.177	-10.162	1196.309	-2.0513	1.0888	-0.26977	130.383	-110.07	1602.563	-0.88281	0.76563	-0.61328	NaN	NaN	NaN	NaN	NaN	NaN
3.568	50.632	10.90438	1396.897	-1.7148	1.2871	-0.46387	-21.4098	-8.196	1283.302	-2.3789	1.3047	-0.21289	115.751	-107.739	1600.072	-1.1914	0.98242	-0.62695	NaN	NaN	NaN	NaN	NaN	NaN
3.57	28.6666	-2.3274	1373.5222	-1.6672	1.2594	-0.45293	-55.3657	-53.497	1352.534	-2.8159	1.6353	-0.13281	115.628	-87.62	1649.581	-1.3894	1.1555	-0.6438	NaN	NaN	NaN	NaN	NaN	NaN
3.572	24.24665	-8.529	1360.8291	-1.6257	1.2306	-0.44287	-36.262	-116.857	1367.401	-3.0176	1.8066	-0.1084	89.554	-130.742	1657.2293	-1.5601	1.3403	-0.68506	NaN	NaN	NaN	NaN	NaN	NaN
3.574	24.8527	-7.0622	1358.6921	-1.5908	1.2028	-0.43309	-109.718	-163.219	1342.938	-3.3257	2.1431	-0.09375	49.752	-114.388	1705.765	-1.7539	1.5771	-0.76367	NaN	NaN	NaN	NaN	NaN	NaN
3.576	8.1876	8.1616	1342.5062	-1.559	1.1819	-0.42783	-122.48	-217.178	1380.609	-3.3064	2.2942	-0.040527	43.55715	-138.774	1750.23	-1.8438	1.6797	-0.79883	NaN	NaN	NaN	NaN	NaN	NaN
3.578	29.388438	17.3618	1316.7144	-1.5273	1.1563	-0.41797	-111.301	-226.317	1363.584	-3.2598	2.2988	-0.09668	-8.672	-136.6042	1793.124	-2.0371	1.8613	-0.84961	NaN	NaN	NaN	NaN	NaN	NaN
3.58	8.34754	22.6244	1314.4151	-1.4975	1.1391	-0.4049	-146.578	-236.62	1285.79	-3.1167	2.2583	-0.44873	-42.9224	-181.8147	1815.26	-2.2773	2.0234	-0.89258	NaN	NaN	NaN	NaN	NaN	NaN
3.582	26.767	30.5138	1306.56	-1.463	1.1235	-0.39242	-84.311	-262.578	1240.434	-2.8452	2.1821	-0.55811	-61.153	-190.247	1836.391	-2.4067	2.1118	-0.90771	NaN	NaN	NaN	NaN	NaN	NaN
3.584	15.9511	46.4662	1280.01248	-1.4302	1.1048	-0.38458	-79.079	-215.623	1177.409	-2.1655	1.9224	-0.60107	-51.558	-213.763	1829.029	-2.6187	2.2563	-0.91748	NaN	NaN	NaN	NaN	NaN	NaN
3.586	48.53	52.2267	1259.7796	-1.404	1.0833	-0.37081	-99.7963	-164.5125	1183.298	-1.707	1.6494	-0.54224	-66.177	-210.825	1849.037	-2.71	2.3208	-0.91357	NaN	NaN	NaN	NaN	NaN	NaN
3.588	48.858	49.2139	1253.0025	-1.3804	1.061	-0.36475	-54.285	-92.814	1165.002	-1.3418	1.3379	-0.46094	-70.945	-186.87	1836.219	-2.6953	2.3516	-0.88477	NaN	NaN	NaN	NaN	NaN	NaN
3.59	48.702	57.5392	1242.9425	-1.3562	1.0437	-0.35873	-121.986	-56.246	1108.9362	-1.0547	1.1152	-0.47852	-71.589	-152.023	1803.409	-2.7148	2.3516	-1.002	NaN	NaN	NaN	NaN	NaN	NaN
3.592	74.634	70.1901	1226.926	-1.3325	1.0279	-0.35011	-117.161	-103.277	1111.6383	-0.9585	1.0415	-0.52832	-60.913	-99.757	1757.9267	-2.625	2.2871	-1.0273	NaN	NaN	NaN	NaN	NaN	NaN
3.594	52.829	86.091	1187.0234	-1.3126	1.0095	-0.34185	-67.0735	-99.608	1104.258	-0.79297	0.90527	-0.61719	-55.172	-66.179	1728.978	-2.3574	2.0977	-0.96289	NaN	NaN	NaN	NaN	NaN	NaN
3.596	55.341	83.1984	1182.3474	-1.2881	0.98882	-0.33189	-122.977	-131.883	1088.012	-0.65429	0.79297	-0.63427	-58.101	-23.195	1719.415	-2.2451	2.0439	-0.90918	NaN	NaN	NaN	NaN	NaN	NaN
3.598	52.006	86.1892	1178.82035	-1.2671	0.96924	-0.32568	-66.5302	-187.135	1111.279	-0.52148	0.66406	-0.61719	-36.0989	-4.419	1716.351	-2.2402	2.0977	-0.91895	NaN	NaN	NaN	NaN	NaN	NaN
3.6	66.032	87.4469	1162.9736	-1.2428	0.9472	-0.32278	-44.5814	-205.802	1095.796	-0.36865	0.5083	-0.59912	-15.2739	59.0318	1680.901	-2.2793	2.2168	-0.92871	NaN	NaN	NaN	NaN	NaN	NaN
3.602	60.308	84.444	1137.1777	-1.2168	0.9252	-0.31212	-61.678	-297.7006	1142.22	-0.30518	0.44189	-0.60547	1.97	77.865	1647.044	-2.2612	2.2603	-0.89404	NaN	NaN	NaN	NaN	NaN	NaN
3.604	44.862	83.32	1118.6733	-1.1931	0.89884	-0.30645	3.223	-336.447	1177.288	-0.19873	0.34424	-0.62646	-11.3124	108.856	1650.428	-2.1187	2.2231	-0.83154	NaN	NaN	NaN	NaN	NaN	NaN
3.606	45.384	87.3943	1101.8053	-1.1655	0.87245	-0.30309	-6.0373	-370.12	1184.262	-0.14404	0.28637	-0.63159	29.7799	72.344	1668.15	-1.9861	2.0857	-0.82056	NaN	NaN	NaN	NaN	NaN	NaN
3.608	36.277	95.5945	1073.67066	-1.1426	0.84766	-0.2998	14.837	-427.705	1263.6187	-0.12744	0.23633	-0.63672	68.23	85.45	1641.711	-1.8594	1.918	-0.82031	NaN	NaN	NaN	NaN	NaN	NaN
3.61	47.079	106.7272	1064.7822	-1.106	0.82041	-0.29035	40.82	-376.487	1312.132	-0.16895	0.19336	-0.65234	86.632	56.35	1644.209	-1.7285	1.7188	-0.82422	NaN	NaN	NaN	NaN	NaN	NaN
3.612	24.2459	117.8308	1059.9446	-1.0731	0.78852	-0.27786	18.544	-363.249	1382.703	-0.21191	0.19189	-0.64209	70.122	83.0504	1627.98	-1.6772	1.6372	-0.81885	NaN	NaN	NaN	NaN	NaN	NaN
3.614	28.5002	110.6122	1045.274	-1.0438	0.75689	-0.26522	55.6918	-329.886	1439.422	-0.36279	0.24365	-0.61865	91.413	45.147	1640.726	-1.5854	1.522	-0.81982	NaN	NaN	NaN	NaN	NaN	NaN
3.616	14.667	108.7707	1016.9409	-1.0187	0.72109	-0.25546	52.373	-264.3863	1417.328	-0.52783	0.3396	-0.58496	93.779	81.451	1623.913	-1.5329	1.4807	-0.81665	NaN	NaN	NaN	NaN	NaN	NaN
3.618	-5.135	109.194078	985.77756	-0.9873	0.69531	-0.24365	36.957	-293.9504	1431.426	-0.72607	0.46826	-0.55762	118.865	64.312	1600.3454	-1.4956	1.4536	-0.8042	NaN	NaN	NaN	NaN	NaN	NaN
3.62	-20.67819	113.2994	964.9281	-0.95935	0.66605	-0.23338	70.466	-251.925	1454.533	-1.0156	0.66406	-0.55273	119.582	113.37	1586.1012	-1.4692	1.4595	-0.79834	NaN	NaN	NaN	NaN	NaN	NaN
3.622	-13.4239	127.13673	946.86555	-0.92711	0.63848	-0.22723	33.01112	-230.621	1438.916	-1.1499	0.76611	-0.55225	119.575	73.133	1599.805	-1.4624	1.4614	-0.79248	NaN	NaN	NaN	NaN	NaN	NaN
3.624	-16.4624	124.83231	905.7272	-0.89688	0.60801	-0.21786	68.643	-220.219	1449.723	-1.3921	0.979	-0.58545	45.6085	162.747	1567.018	-1.4409	1.4692	-0.77686	NaN	NaN	NaN	NaN	NaN	NaN
3.626	-50.3631	127.97464	874.4981	-0.87028	0.5794	-0.2083	94.435	-152.927	1444.288	-1.5713	1.1606	-0.6372	17.131	162.376	1526.773	-1.4136	1.4668	-0.76758	NaN	NaN	NaN	NaN	NaN	NaN
3.628	-34.5908	131.5276	849.013	-0.83643	0.55127	-0.19775	33.575	-170.821	1455.669	-1.7456	1.3442	-0.68311	-27.707	243.582	1466.098	-1.3672	1.4512	-0.75293	NaN	NaN	NaN	NaN	NaN	NaN
3.63	-39.5856	149.2971	822.3062	-0.81045	0.52245	-0.18683	46.768	-191.803	1502.74563	-1.9937	1.5767	-0.70459	-43.263	226.527	1441.717	-1.2866	1.4009	-0.74756	NaN	NaN	NaN	NaN	NaN	NaN
3.632	-23.187	157.8911	817.9716	-0.78233	0.49505	-0.17604	26.5909	-175.815	1512.5451	-2.1226	1.6919	-0.70264	-70.601	265.257	1404.309	-1.2417	1.3696	-0.73584	NaN	NaN	NaN	NaN	NaN	NaN
3.634	-24.9305	154.8644	801.7737	-0.76027	0.46762	-0.16505	-12.7699	-207.293	1564.911	-2.3921	1.9009	-0.69482	-77.311	215.886	1388.4201	-1.1582	1.3027	-0.71094	NaN	NaN	NaN	NaN	NaN	NaN
3.636	-16.9835	143.6555	776.6291	-0.73066	0.44003	-0.15524	35.722	-179.2759	1590.525	-2.5039	2.0176	-0.66894	-111.7234	266.424	1331.3437	-1.1113	1.251	-0.69189	NaN	NaN	NaN	NaN	NaN	NaN
3.638	6.486	137.22762	748.5461	-0.70264	0.41309	-0.14404	22.5932	-172.6744	1603.486	-2.623	2.0879	-0.67773	-143.248	211.0885	1293.60493	-1.0679	1.2036	-0.67627	NaN	NaN	NaN	NaN	NaN	NaN
3.64	-6.392	129.0289	727.0897	-0.67882	0.38508	-0.13317	-17.7204	-207.09	1656.983	-2.7651	2.1567	-0.81592	-155.369	233.818	1265.5492	-1.0229	1.1411	-0.64404	NaN	NaN	NaN	NaN	NaN	NaN
3.642	2.187	146.4847	726.0284	-0.65387	0.36103	-0.12128	4.8154	-168.0373	1669.942	-2.7305	2.1484	-0.86719	-126.069	179.174	1233.444	-1.0034	1.1187	-0.63135	NaN	NaN	NaN	NaN	NaN	NaN
3.644	3.461	155.589	697.9846	-0.62895	0.33448	-0.11382	-11.043	-199.792	1664.799	-2.5308	2.022	-0.89307	-140.6568	226.29059	1175.296	-0.97021	1.0767	-0.60303	NaN	NaN	NaN	NaN	NaN	NaN
3.646	19.494	148.583	670.0705	-0.60171	0.31305	-0.10369	7.145	-210.267	1668.396	-2.3723	1.9172	-0.85766	-138.211	173.599	1151.398	-0.9541	1.0542	-0.57299	NaN	NaN	NaN	NaN	NaN	NaN
3.648	11.695	139.424	625.6813	-0.57373	0.2915	-0.092285	49.5408	-151.998	1646.662	-2.269	1.8716	-0.83154	-164.931	208.301	1102.87	-0.93359	1.0352	-0.54492	NaN	NaN	NaN	NaN	NaN	NaN
3.65	11.937	133.3888	619.002	-0.54875	0.27423	-0.084479	19.191	-190.812	1616.807	-2.2559	1.8984	-0.83789	-181.313	164.596	1085.121	-0.90039	1.0078	-0.5	NaN	NaN	NaN	NaN	NaN	NaN
3.652	32.9189	136.2789	607.1548	-0.52405	0.25568	-0.07647	64.398	-143.469	1595.992	-2.2593	1.9282	-0.83545	-171.32	222.886	1037.068	-0.87695	0.98535	-0.48145	NaN	NaN	NaN	NaN	NaN	NaN
3.654	40.8421	137.5056	574.6327	-0.49787	0.23966	-0.068271	50.0477	-108.056	1567.585	-2.2593	1.9712	-0.81201	-133.809	184.254	982.166	-0.81836	0.92188	-0.44531	NaN	NaN	NaN	NaN	NaN	NaN
3.656	32.7468	123.14613	562.7203	-0.47745	0.22393	-0.059865	37.4789	-134.39	1596.786	-2.1951	1.9641	-0.79907	-102.235	223.4512	940.8124	-0.76245	0.86792	-0.41064	NaN	NaN	NaN	NaN	NaN	NaN
3.658	30.4423	118.7061	549.719	-0.45605	0.20703	-0.052734	94.101	-56.25	1589.209	-2.1074	1.9199	-0.78516	-75.7171	167.464	891.9587	-0.70117	0.80664	-0.37891	NaN	NaN	NaN	NaN	NaN	NaN
3.66	48.9322	124.9447	534.3645	-0.43603	0.19267	-0.037987	81.8189	-52.229	1585.7215	-1.9761	1.7817	-0.74658	-68.957	206.669	821.087	-0.62842	0.72119	-0.34326	NaN	NaN	NaN	NaN	NaN	NaN
3.662	22.753	141.9883	500.5094	-0.41689	0.18076	-0.036424	88.671	-17.191	1617.4708	-1.9121	1.709	-0.7207	-38.661	174.486	760.543	-0.58984	0.6748	-0.32617	NaN	NaN	NaN	NaN	NaN	NaN
3.664	13.1683	148.031	479.164	-0.40009	0.17217	-0.031737	81.419	32.096	1600.4215	-1.8013	1.5688	-0.68408	-16.32	227.55	684.6109	-0.5127	0.5918	-0.28711	NaN	NaN	NaN	NaN	NaN	NaN
3.666	15.722	154.288	462.778	-0.37656	0.16113	-0.024706	80.786	-29.095	1605.6558	-1.7458	1.4807	-0.67846	13.066	208.9832	646.589	-0.45874	0.53344	-0.26075	NaN	NaN	NaN	NaN	NaN	NaN
3.668	-2.3198	153.964	444.959	-0.35693	0.15088	-0.01709	130.916	-18.442	1598.8759	-1.7051	1.417	-0.67285	3.979	239.689	588.356	-0.4043	0.48438	-0.23682	NaN	NaN	NaN	NaN	NaN	NaN
3.67	-12.1004	137.573	411.0079	-0.33604	0.14483	-0.011718	105.207	-47.0486	1561.4595	-1.6792	1.3638	-0.66357	18.011	223.463	571.481	-0.33887	0.41602	-0.20752	NaN	NaN	NaN	NaN	NaN	NaN
3.672	-13.3191	123.703	383.1776	-0.31728	0.13867	-0.0040039	101.18	-114.965	1607.596	-1.6753	1.3462	-0.66162	16.551	257.4969	519.58	-0.30518	0.38428	-0.18945	NaN	NaN	NaN	NaN	NaN	NaN
3.674	-3.209	109.142	375.7495	-0.30049	0.13398	-0.0063474	144.825	-87.648	1609.497	-1.6602	1.3203	-0.64453	16.4	218.729	497.7809	-0.23584	0.31543	-0.15381	NaN	NaN	NaN	NaN	NaN	NaN
3.676	-25.8541	119.67	368.2428	-0.28349	0.13028	-0.00019552	90.171	-96.328	1596.868	-1.6482	1.2991	-0.63721	-0.957000000000001	231.87	477.306	-0.18946	0.26636	-0.13037	NaN	NaN	NaN	NaN	NaN	NaN
3.678	-31.4148	124.122	342.0753	-0.26904	0.13135	0.0078125	91.808	-93.426	1581.792	-1.627	1.2773	-0.625	-5.524	200.483	447.974	-0.14258	0.21973	-0.11279	NaN	NaN	NaN	NaN	NaN	NaN
3.68	-10.8378	124.3334	310.2906	-0.25488	0.13047	0.012402	114.342	-45.6162	1536.523	-1.584	1.2461	-0.60547	4.461	230.255	403.8309	-0.089355	0.15771	-0.084473	NaN	NaN	NaN	NaN	NaN	NaN
3.682	-1.089	120.2266	296.0604	-0.24287	0.13379	0.018848	62.362	-48.784	1538.804	-1.5586	1.2217	-0.59961	-10.494	218.024	350.716	-0.06543	0.12695	-0.071777	NaN	NaN	NaN	NaN	NaN	NaN
3.684	-19.5285	119.6632	278.8261	-0.2331	0.1373	0.031348	69.823	-5.4984	1542.874	-1.521	1.1909	-0.57764	-23.885	221.6971	308.3938	-0.026367	0.07666	-0.045898	NaN	NaN	NaN	NaN	NaN	NaN
3.686	-27.4267	108.4374	272.806	-0.21611	0.14014	0.027637	30.9816	35.967	1507.9678	-1.5017	1.1663	-0.56176	-23.526	172.0804	285.3407	-0.0063476	0.042969	-0.030029	NaN	NaN	NaN	NaN	NaN	NaN
3.688	-20.0304	98.79983	267.857	-0.20117	0.146	0.030762	32.111	26.514	1482.3929	-1.4858	1.1353	-0.54834	-56.695	177.435	260.5554	0.0058594	0.015137	-0.015137	NaN	NaN	NaN	NaN	NaN	NaN
3.69	-20.73568	100.4293	243.9341	-0.18428	0.14707	0.034473	54.385	86.659	1455.7191	-1.4644	1.1128	-0.52979	-79.56	156.995	222.474	0.0083008	-0.023926	0.0019531	NaN	NaN	NaN	NaN	NaN	NaN
3.692	-37.3856	100.7325	231.8039	-0.17158	0.14687	0.033887	-16.6224	90.9718	1407.1938	-1.4585	1.1021	-0.521	-69.85988	159.494	200.02	0.0063477	-0.033691	0.016602	NaN	NaN	NaN	NaN	NaN	NaN
3.694	-9.025	85.245	204.924	-0.15166	0.14882	0.034668	10.449	95.7177	1398.0952	-1.4312	1.0767	-0.50635	-63.7709	148.9518	177.1267	-0.024414	-0.043945	0.029785	NaN	NaN	NaN	NaN	NaN	NaN
3.696	10.529	92.9938	202.2083	-0.13516	0.14863	0.035254	0.915	135.6	1365.875	-1.4023	1.0586	-0.49072	-100.5959	153.734	161.45	-0.061524	-0.048584	0.04126	NaN	NaN	NaN	NaN	NaN	NaN
3.698	13.596	97.42357	166.79212	-0.11768	0.14697	0.035645	-50.691	76.8564	1364.33531	-1.3809	1.043	-0.48633	-116.11	156.663	115.0212	-0.10303	-0.045898	0.057617	NaN	NaN	NaN	NaN	NaN	NaN
3.7	11.5211	97.015	140.26614	-0.10078	0.14658	0.036914	-2.5818	66.163	1359.5799	-1.332	1.0117	-0.46533	-114.401	167.69	103.5549	-0.16699	-0.036133	0.080566	NaN	NaN	NaN	NaN	NaN	NaN
3.702	29.8277	85.942	148.3674	-0.083398	0.14267	0.036816	-37.135	56.611	1292.476	-1.282	0.97828	-0.44995	-124.92	140.369	83.829	-0.20215	-0.02832	0.092285	NaN	NaN	NaN	NaN	NaN	NaN
3.704	23.3344	75.86045	160.734	-0.068554	0.13682	0.037598	-49.469	23.904	1257.872	-1.2285	0.93359	-0.43262	-101.088	120.063	98.4217	-0.27393	-0.010742	0.11084	NaN	NaN	NaN	NaN	NaN	NaN
3.706	35.4738	66.9872	143.9637	-0.056543	0.13066	0.038476	-8.2216	71.286	1226.885	-1.1602	0.87695	-0.40869	-64.5495	85.359	75.5894	-0.32764	0.001709	0.12378	NaN	NaN	NaN	NaN	NaN	NaN
3.708	20.8238	72.119	120.3846	-0.050293	0.125	0.029297	-67.677	87.094	1210.004	-1.1348	0.85352	-0.40137	-56.44142	63.932	51.2508	-0.37646	0.021973	0.13672	NaN	NaN	NaN	NaN	NaN	NaN
3.71	21.731	57.6272	125.4067	-0.036426	0.11943	0.035742	-17.415	87.586	1211.564	-1.0737	0.7915	-0.36865	-48.8698	13.185	22.2	-0.4292	0.053711	0.14453	NaN	NaN	NaN	NaN	NaN	NaN
3.712	18.473	73.6275	118.7261	-0.02168	0.11026	0.035449	32.1319	127.559	1197.026	-1.0393	0.76294	-0.35156	-24.6263	-10.775	36.076	-0.45825	0.071045	0.15479	NaN	NaN	NaN	NaN	NaN	NaN
3.714	19.982	85.066	104.2377	-0.012696	0.10283	0.033496	-7.9674	116.1637	1182.484	-1.0093	0.73584	-0.33252	-5.528	-22.154	34.1722	-0.48242	0.099609	0.16455	NaN	NaN	NaN	NaN	NaN	NaN
3.716	4.77	84.004	83.4434	0.00039062	0.093066	0.029492	35.5788	133.511	1168.581	-0.96094	0.69531	-0.31348	24.9856	1.053	33.9401	-0.50635	0.12451	0.17529	NaN	NaN	NaN	NaN	NaN	NaN
3.718	7.105	65.262	74.1699	0.010254	0.08252	0.03125	19.1964	162.275	1112.7753	-0.93359	0.67578	-0.30029	48.0558	-10.0552	7.9962	-0.51563	0.13525	0.16748	NaN	NaN	NaN	NaN	NaN	NaN
3.72	16.132	51.5489	63.0878	0.024023	0.070996	0.031836	27.264	140.2263	1047.8713	-0.8833	0.63721	-0.2793	49.041	-23.3923	24.5132	-0.53467	0.15625	0.16895	NaN	NaN	NaN	NaN	NaN	NaN
3.722	-8.686	49.6859	71.2585	0.033692	0.058984	0.03125	74.8316	163.5786	1014.6778	-0.84546	0.60865	-0.25879	38.69	-39.05163	23.96446	-0.54248	0.17553	0.16138	NaN	NaN	NaN	NaN	NaN	NaN
3.724	-16.174	46.43	58.6019	0.043457	0.046875	0.030469	21.2853	161.559653	953.804	-0.80273	0.58008	-0.24121	43.4449	-20.9492	44.716	-0.55029	0.18945	0.16016	NaN	NaN	NaN	NaN	NaN	NaN
3.726	3.827	40.381	70.8698	0.05459	0.033789	0.029981	23.5134	142.681	937.9138	-0.7417	0.53271	-0.22021	65.6232	1.085	10.6817	-0.55664	0.21094	0.15967	NaN	NaN	NaN	NaN	NaN	NaN
3.728	-16.119	37.216	59.3259	0.061035	0.018066	0.032715	31.5573	172.987	923.312	-0.71582	0.50879	-0.20361	92.069	-3.2558	27.147	-0.55713	0.22217	0.15723	NaN	NaN	NaN	NaN	NaN	NaN
3.73	-28.0673	43.7094	40.3116	0.068164	0.0081055	0.032226	0.100000000000001	164.751	906.739	-0.65381	0.46338	-0.18018	79.0926	-8.1312	2.09	-0.55664	0.24072	0.15967	NaN	NaN	NaN	NaN	NaN	NaN
3.732	-23.78	36.97883	26.732	0.074121	-0.0064453	0.03418	43.1698	158.897	891.822	-0.61377	0.43066	-0.16748	25.2581	0.3187	-1.524	-0.54663	0.25513	0.16236	NaN	NaN	NaN	NaN	NaN	NaN
3.734	-17.4328	40.6796	33.867	0.083887	-0.013867	0.035742	14.38	192.281	850.5945	-0.56787	0.39307	-0.1499	46.117	31.10081	-52.941	-0.52686	0.26221	0.16797	NaN	NaN	NaN	NaN	NaN	NaN
3.736	-28.0726	42.909	17.3886	0.093359	-0.025879	0.034082	-2.436	172.3857	826.282	-0.51563	0.35107	-0.12695	31.3764	57.716	-33.863	-0.49609	0.26025	0.17383	NaN	NaN	NaN	NaN	NaN	NaN
3.738	-43.698	34.811	13.74008	0.10547	-0.029297	0.030273	29.328	179.987	811.068	-0.48828	0.32764	-0.11719	27.43	64.37	-53.472	-0.47217	0.25684	0.18262	NaN	NaN	NaN	NaN	NaN	NaN
3.74	-16.677	17.6799	14.894	0.11768	-0.042481	0.03291	-29.0027	178.5207	775.957	-0.43359	0.28906	-0.091797	-13.458	41.458	1.005	-0.4248	0.23975	0.19287	NaN	NaN	NaN	NaN	NaN	NaN
3.742	-6.424	6.5007	43.2954	0.12841	-0.055664	0.034375	-15.8177	152.629	745.29	-0.3916	0.25586	-0.080322	0.942	46.26	-20.991	-0.37378	0.19995	0.19605	NaN	NaN	NaN	NaN	NaN	NaN
3.744	-7.321	16.5179	32.8889	0.14013	-0.066992	0.038281	3.477	170.8917	709.405	-0.3584	0.229	-0.067383	-32.9294	33.378	-1.43	-0.31494	0.15918	0.19629	NaN	NaN	NaN	NaN	NaN	NaN
3.746	-17.1502	20.304	26.7537	0.14463	-0.074316	0.042773	-47.3332	149.851	653.46	-0.31396	0.19873	-0.046387	-50.0166	23.0286	-6.1524	-0.22998	0.090332	0.19385	NaN	NaN	NaN	NaN	NaN	NaN
3.748	19.032	23.2745	15.4505	0.14893	-0.090332	0.044434	-14.893	127.723	627.8318	-0.30029	0.18506	-0.039063	-90.826	16.881	57.789	-0.18506	0.052734	0.19287	NaN	NaN	NaN	NaN	NaN	NaN
3.75	8.8402	32.5513	10.27979	0.14873	-0.097852	0.045703	-67.642	164.0476	573.976	-0.2666	0.16211	-0.02002	-101.2204	37.3532	-6.9474	-0.10156	-0.015625	0.18555	NaN	NaN	NaN	NaN	NaN	NaN
3.752	3.715	31.86	7.7608	0.1497	-0.1041	0.050977	-52.669	125.143	552.082	-0.25073	0.15015	-0.0070799	-86.016	40.861	17.6254	-0.032471	-0.076416	0.18189	NaN	NaN	NaN	NaN	NaN	NaN
3.754	16.4044	15.1123	-2.1129	0.14736	-0.10957	0.052539	-28.402	130.1721	532.79	-0.23682	0.13867	0.010742	-80.5236	54.5782	-10.814	0.032715	-0.12988	0.17529	NaN	NaN	NaN	NaN	NaN	NaN
3.756	37.106	-10.9059	28.4348	0.14287	-0.11162	0.05957	-69.541	150.4567	474.8919	-0.23047	0.13135	0.027344	-93.128	21.3303	27.7992	0.12988	-0.21094	0.17285	NaN	NaN	NaN	NaN	NaN	NaN
3.758	19.5805	-7.1055	23.273	0.12793	-0.11084	0.061035	-30.2566	122.913	458.5238	-0.22656	0.13232	0.035156	-74.9784	23.478	46.1035	0.17969	-0.24512	0.17334	NaN	NaN	NaN	NaN	NaN	NaN
3.76	20.3263	7.34677	23.8053	0.12276	-0.10313	0.067578	-19.288	167.017	415.824	-0.22021	0.12256	0.05127	-74.6	16.5743	40.47822	0.271	-0.31299	0.17383	NaN	NaN	NaN	NaN	NaN	NaN
3.762	25.3999	22.4489	16.5159	0.11709	-0.093067	0.071582	-51.9885	177.54	375.579	-0.21802	0.12207	0.058594	-57.534	46.0512	6.304	0.33277	-0.35865	0.17431	NaN	NaN	NaN	NaN	NaN	NaN
3.764	26.4484	15.101	32.859	0.10615	-0.087207	0.073926	0.654	154.8026	369.5598	-0.21289	0.12793	0.069336	-40.4831	25.4933	51.8631	0.38232	-0.39795	0.17871	NaN	NaN	NaN	NaN	NaN	NaN
3.766	27.1566	19.5735	22.8214	0.09883	-0.078516	0.077051	3.8138	186.558	328.78	-0.2124	0.13281	0.083496	-24.277	28.1575	48.695	0.43359	-0.44043	0.16895	NaN	NaN	NaN	NaN	NaN	NaN
3.768	32.3347	9.736	11.2923	0.09082	-0.06543	0.080078	-16.9451	119.646	301.99	-0.21484	0.13916	0.084961	-28.036	22.2904	43.05	0.4541	-0.45654	0.17383	NaN	NaN	NaN	NaN	NaN	NaN
3.77	19.8007	9.6869	4.74462	0.080762	-0.053711	0.084863	46.145	96.9733	291.1127	-0.2124	0.14355	0.096191	21.302	45.5297	18.6266	0.47852	-0.47754	0.16797	NaN	NaN	NaN	NaN	NaN	NaN
3.772	23.27	15.8623	13.9251	0.069239	-0.042383	0.086035	15.3561	120.34745	253.9587	-0.21143	0.14331	0.10181	19.5788	15.8779	16.745	0.47754	-0.48095	0.17236	NaN	NaN	NaN	NaN	NaN	NaN
3.774	12.194	11.7896	18.734	0.058691	-0.030274	0.086816	51.49	95.7654	239.531	-0.2085	0.146	0.10889	16.174	18.3275	28.482	0.47363	-0.47656	0.16992	NaN	NaN	NaN	NaN	NaN	NaN
3.776	3.267	4.2686	18.9288	0.0458	-0.018067	0.083203	72.861	132.808	214.127	-0.20215	0.14795	0.1167	40.2778	-10.1108	49.83	0.44238	-0.45068	0.17334	NaN	NaN	NaN	NaN	NaN	NaN
3.778	-11.91	0.9158	17.08646	0.031738	-0.012695	0.082031	35.7249	125.1567	176.376	-0.19482	0.14893	0.11963	86.7564	2.875	24.5995	0.41797	-0.43359	0.1709	NaN	NaN	NaN	NaN	NaN	NaN
3.78	-9.2152	5.765	20.9743	0.019726	-0.0029297	0.080762	70.776	73.4682	185.18353	-0.18652	0.14844	0.12549	85.856	-30.4257	13.53524	0.35547	-0.3877	0.17773	NaN	NaN	NaN	NaN	NaN	NaN
3.782	-13.4321	16.5578	38.2746	0.00625	0.0061523	0.079785	35.6655	108.216	174.2377	-0.17016	0.14966	0.12403	70.253	-38.605	21.2588	0.30468	-0.34131	0.18018	NaN	NaN	NaN	NaN	NaN	NaN
3.784	-22.3907	-11.0522	59.5428	-0.00039058	0.015918	0.07002	47.257	64.964	157.061	-0.15479	0.14844	0.12695	35.611	-49.412	24.77856	0.25342	-0.29834	0.18262	NaN	NaN	NaN	NaN	NaN	NaN
3.786	-31.3	-38.2025	69.5967	-0.010254	0.024707	0.061817	67.475	68.90168	141.509	-0.13672	0.14551	0.13135	36.485	-15.146	13.4793	0.18311	-0.23828	0.18457	NaN	NaN	NaN	NaN	NaN	NaN
3.788	-24.7037	-45.3032	71.0418	-0.019531	0.035645	0.049316	20.2871	114.96	83.6906	-0.12744	0.14551	0.13184	55.454	4.8253	-19.6597	0.15576	-0.20898	0.18604	NaN	NaN	NaN	NaN	NaN	NaN
3.79	-19.9985	-44.2159	78.4362	-0.029688	0.045899	0.039746	33.5366	64.0934	81.652	-0.1167	0.14307	0.1333	56.0731	15.5206	0.2989	0.097656	-0.15234	0.18945	NaN	NaN	NaN	NaN	NaN	NaN
3.792	-59.590057	-46.4626	123.5165	-0.043555	0.063281	0.029297	20.067	104.561	45.225	-0.10522	0.14428	0.13208	12.98	-10.9584	-11.1343	0.068848	-0.11059	0.18872	NaN	NaN	NaN	NaN	NaN	NaN
3.794	-58.258	-36.3147	198.7533	-0.06582	0.08125	0.01836	4.397	103.1836	43.6059	-0.094238	0.14648	0.1333	-3.427	4.444	-2.14	0.046875	-0.087402	0.18457	NaN	NaN	NaN	NaN	NaN	NaN
3.796	-61.054	-12.41899	261.8945	-0.097658	0.096092	9.762e-05	14.9044	64.1203	56.69906	-0.083984	0.14355	0.13672	-14.258	12.994	-26.991	0.035156	-0.050293	0.18213	NaN	NaN	NaN	NaN	NaN	NaN
3.798	-60.938	-1.0242	348.43	-0.13525	0.11523	-0.022461	-11.938	91.913	26.802	-0.07666	0.14697	0.13525	-20.7928	38.8798	-22.2705	0.032227	-0.036133	0.17969	NaN	NaN	NaN	NaN	NaN	NaN
3.8	-64.162	-14.2909	442.467	-0.18535	0.13633	-0.044727	-31.676	38.228	27.2705	-0.061523	0.15039	0.13867	-50.7802	29.82	-4.4295	0.017578	-0.013184	0.17676	NaN	NaN	NaN	NaN	NaN	NaN
3.802	-80.508	-33.464	543.3208	-0.24648	0.16592	-0.0667	-5.797	30.911	32.6349	-0.047851	0.14307	0.13745	-58.85	45.279	13.1928	-0.00024415	0.0090332	0.17578	NaN	NaN	NaN	NaN	NaN	NaN
3.804	-86.392	-32.836	609.6988	-0.32226	0.19677	-0.09248	-71.559	59.222	-2.3677	-0.035645	0.1377	0.13379	-84.05125	43.6479	-46.025	-0.021973	0.02832	0.17139	NaN	NaN	NaN	NaN	NaN	NaN
3.806	-79.476	-28.576	643.4209	-0.41328	0.22978	-0.11103	-24.7921	-12.6238	14.2042	-0.0092773	0.12402	0.1333	-76.451	64.706	-40.2956	-0.042969	0.056152	0.16406	NaN	NaN	NaN	NaN	NaN	NaN
3.808	-54.971	-34.955	685.11	-0.5249	0.27197	-0.12646	-41.4709	23.5496	-1.1731	0	0.11816	0.13379	-99.723	49.70422	-24.6409	-0.055664	0.071289	0.16406	NaN	NaN	NaN	NaN	NaN	NaN
3.81	-19.907	-47.244	751.402	-0.66103	0.3336	-0.14902	-70.051	26.0149	-2.4217	0.029785	0.095215	0.1416	-101.568	47.34529	29.0482	-0.063477	0.097656	0.15039	NaN	NaN	NaN	NaN	NaN	NaN
3.812	-7.0279	-67.459	788.316	-0.81358	0.40869	-0.16651	-12.12	-6.04018	13.7673	0.051269	0.07251	0.13843	-66.1845	35.2755	27.8997	-0.062988	0.11206	0.14477	NaN	NaN	NaN	NaN	NaN	NaN
3.814	30.1284	-71.79	788.7597	-0.97412	0.49815	-0.17471	-53.441	49.695	0.4273	0.076172	0.05127	0.1333	-53.2952	29.2433	29.368	-0.064453	0.12354	0.13477	NaN	NaN	NaN	NaN	NaN	NaN
3.816	42.124	-84.93	834.0768	-1.1452	0.59463	-0.17705	-23.1402	3.911	9.0409	0.104	0.018555	0.12744	-51.8681	19.59237	2.903	-0.052246	0.1333	0.13623	NaN	NaN	NaN	NaN	NaN	NaN
3.818	46.613	-64.2376	862.907	-1.312	0.68701	-0.17822	23.4065	-8.699	10.9236	0.12451	-0.00048828	0.13037	-48.6061	11.2216	63.257	-0.045898	0.13477	0.12793	NaN	NaN	NaN	NaN	NaN	NaN
3.82	48.93	-67.08538	900.915	-1.4741	0.78809	-0.16328	-0.904999999999999	28.244	-2.6892	0.15918	-0.03418	0.125	-45.25	17.7359	36.9123	-0.030762	0.12744	0.11865	NaN	NaN	NaN	NaN	NaN	NaN
3.822	59.046	-85.028	886.6639	-1.6242	0.9	-0.14981	13.6619	-28.7458	25.3353	0.18897	-0.063965	0.1267	-22.656	37.172	33.889	-0.016602	0.11939	0.11133	NaN	NaN	NaN	NaN	NaN	NaN
3.824	62.715	-115.081	887.9321	-1.7524	1.0219	-0.13222	26.2012	18.491	35.867	0.21387	-0.09082	0.125	13.938	45.804	6.0074	-0.0097656	0.11133	0.10693	NaN	NaN	NaN	NaN	NaN	NaN
3.826	77.912	-98.3409	937.122	-1.8598	1.1422	-0.11983	13.7231	31.9112	14.0826	0.24658	-0.12646	0.12451	15.5914	21.9608	35.4216	-0.0097656	0.096191	0.096191	NaN	NaN	NaN	NaN	NaN	NaN
3.828	90.975	-48.926	948.226	-1.9312	1.2563	-0.11719	57.2723	-7.5677	16.50845	0.26025	-0.146	0.12256	33.933	26.438	44.2348	-0.0087891	0.091797	0.092285	NaN	NaN	NaN	NaN	NaN	NaN
3.83	66.849	-16.981	936.186	-1.9573	1.3462	-0.12178	43.5458	49.722	-13.41995	0.28809	-0.17676	0.12695	46.6616	20.5537	58.6469	-0.020508	0.087402	0.083496	NaN	NaN	NaN	NaN	NaN	NaN
3.832	63.855	-12.949	903.345	-1.9309	1.3984	-0.14033	49.6233	8.1058	-1.8736	0.31738	-0.20898	0.12988	57.822	36.7252	30.983	-0.035645	0.083008	0.079589	NaN	NaN	NaN	NaN	NaN	NaN
3.834	43.0224	-43.505	888.328	-1.8449	1.4156	-0.15596	76.193	-6.6397	22.1423	0.3291	-0.22217	0.13184	54.437	16.6594	42.178	-0.055176	0.088379	0.072266	NaN	NaN	NaN	NaN	NaN	NaN
3.836	40.444	-78.8973	874.332	-1.7304	1.3841	-0.16797	23.8859	25.3509	15.4089	0.34814	-0.24414	0.1333	69.8312	-1.09	44.1357	-0.077637	0.10303	0.067383	NaN	NaN	NaN	NaN	NaN	NaN
3.838	49.79	-113.7974	884.1527	-1.5957	1.3281	-0.17383	69.759	-43.274	33.864	0.35864	-0.25366	0.13501	41.4294	-12.118	36.393	-0.09082	0.10986	0.062988	NaN	NaN	NaN	NaN	NaN	NaN
3.84	72.583	-136.6777	908.4823	-1.4622	1.2683	-0.17344	53.25	-17.5687	29.674	0.36572	-0.26123	0.14551	75.7421	13.8104	5.296	-0.10303	0.11914	0.060059	NaN	NaN	NaN	NaN	NaN	NaN
3.842	70.283	-132.7748	929.792	-1.3437	1.2086	-0.16289	25.5299	-3.8432	15.3358	0.36572	-0.26611	0.14648	58.258	-23.157	62.0899	-0.10498	0.11475	0.061035	NaN	NaN	NaN	NaN	NaN	NaN
3.844	56.574	-124.233	929.236	-1.2449	1.1418	-0.13477	60.7778	-25.6454	21.0126	0.35547	-0.26563	0.15332	16.621	-62.004	83.885	-0.099609	0.11133	0.056152	NaN	NaN	NaN	NaN	NaN	NaN
3.846	56.748	-128.995	910.753	-1.17	1.0819	-0.11055	6.712	43.393	-2.0838	0.33203	-0.26172	0.1626	-21.116	-73.699	144.775	-0.10107	0.10205	0.044434	NaN	NaN	NaN	NaN	NaN	NaN
3.848	43.786	-156.458	924.778	-1.1157	1.0278	-0.09375	27.5103	4.7522	10.6278	0.31079	-0.25756	0.16723	23.634	-17.261	169.559	-0.099365	0.099855	0.022949	NaN	NaN	NaN	NaN	NaN	NaN
3.85	43.0389	-174.763	963.783	-1.0662	0.98477	-0.082715	15.2506	-24.4229	18.09924	0.28711	-0.24707	0.1709	-12.413	-27.3846	274.498	-0.10596	0.10352	0.00097656	NaN	NaN	NaN	NaN	NaN	NaN
3.852	11.311	-169.702	991.623	-1.0141	0.95	-0.072656	-38.7342	-6.4432	-16.76581	0.25146	-0.24023	0.1748	-44.496	-2.2936	444.286	-0.13867	0.12109	-0.030273	NaN	NaN	NaN	NaN	NaN	NaN
3.854	-17.4297	-158.431	1008	-0.95899	0.91367	-0.06875	-2.089	-65.822	2.7886	0.23047	-0.22607	0.18213	-93.104	-2.4653	641.957	-0.17285	0.13232	-0.049805	NaN	NaN	NaN	NaN	NaN	NaN
3.856	-6.2409	-148.9138	1027.66	-0.90556	0.88096	-0.065625	-29.2884	-18.4841	-5.8671	0.19141	-0.20557	0.17969	-90.943	57.0365	814.906	-0.2627	0.17383	-0.09668	NaN	NaN	NaN	NaN	NaN	NaN
3.858	-17.8679	-145.402	1031.3865	-0.86963	0.84229	-0.063477	-44.724	11.097	-25.083	0.16479	-0.18115	0.18409	-94.58004	25.5261	982.951	-0.34887	0.21436	-0.14208	NaN	NaN	NaN	NaN	NaN	NaN
3.86	-8.9595	-135.304	1018.874	-0.84912	0.81865	-0.052832	-18.7954	-6.4552	-3.788	0.13135	-0.15723	0.18994	-81.6666	2.1898	1125.899	-0.44971	0.26123	-0.1875	NaN	NaN	NaN	NaN	NaN	NaN
3.862	-2.346	-140.807	1050.406	-0.85039	0.80235	-0.041992	-59.107	59.99	-33.872	0.10498	-0.12988	0.18896	-85.278	-65.636	1256.817	-0.6167	0.33838	-0.25488	NaN	NaN	NaN	NaN	NaN	NaN
3.864	15.85975	-125.127	1090.158	-0.86094	0.79258	-0.031836	-40.484	17.8965	-25.9874	0.087891	-0.12061	0.18848	-72.375	-42.344	1346.8016	-0.72217	0.38916	-0.2915	NaN	NaN	NaN	NaN	NaN	NaN
3.866	-6.526	-118.575	1112.8271	-0.87686	0.7874	-0.013476	-13.6837	-5.01506	18.6112	0.056641	-0.09375	0.18945	-100.692	-63.567	1396.837	-0.97412	0.5376	-0.354	NaN	NaN	NaN	NaN	NaN	NaN
3.868	-21.7544	-119.117	1138.8192	-0.89502	0.78564	-0.0039063	-50.062	31.71842	-6.1153	0.042724	-0.070801	0.18384	-79.2	-61.909	1397.911	-1.2043	0.67505	-0.40454	NaN	NaN	NaN	NaN	NaN	NaN
3.87	-3.951	-136.9422	1150.0002	-0.9043	0.77188	0.0063476	-11.9494	-36.433	9.2794	0.028809	-0.053223	0.17627	-49.0062	-144.711	1396.323	-1.4546	0.83447	-0.43018	NaN	NaN	NaN	NaN	NaN	NaN
3.872	8.572	-141.505	1192.664	-0.89014	0.75009	0.0032227	7.086	-2.4758	-6.3126	0.0083008	-0.016113	0.17041	57.94	-162.05	1383.515	-1.8101	1.0503	-0.41162	NaN	NaN	NaN	NaN	NaN	NaN
3.874	13.2556	-131.969	1190.912	-0.86826	0.71573	-0.0045899	-7.2393	5.7786	-17.0777	-0.00097656	0.00097656	0.16455	93.533	-224.94	1320.392	-1.9956	1.1626	-0.38428	NaN	NaN	NaN	NaN	NaN	NaN
3.876	-18.3651	-133.5905	1213.8983	-0.83887	0.67754	-0.017676	28.5131	-33.2397	5.2477	-0.013184	0.043457	0.14746	138.425	-250.47	1274.9078	-2.3418	1.3672	-0.30469	NaN	NaN	NaN	NaN	NaN	NaN
3.878	-16.11135	-137.30911	1226.8334	-0.81836	0.6333	-0.036621	6.1317	34.626	-19.8	-0.021973	0.070068	0.14184	147.522	-263.34	1249.943	-2.5574	1.5305	-0.23633	NaN	NaN	NaN	NaN	NaN	NaN
3.88	3.616	-136.504	1286.636	-0.804	0.59776	-0.056934	29.4786	6.5192	-4.108	-0.027832	0.090332	0.13428	143.183	-228.649	1234.359	-2.7358	1.6821	-0.18896	NaN	NaN	NaN	NaN	NaN	NaN
3.882	26.016	-135.391	1306.656	-0.81318	0.57002	-0.081934	49.7992	-1.6454	3.4377	-0.042969	0.11279	0.125	168.945	-163.667	1174.666	-2.8022	1.8403	-0.15869	NaN	NaN	NaN	NaN	NaN	NaN
3.884	33.6062	-146.337	1312.106	-0.8499	0.55557	-0.10498	11.35633	45.516	2.8826	-0.043945	0.12305	0.12256	181.809	-103.254	1125.46	-2.748	1.8828	-0.1333	NaN	NaN	NaN	NaN	NaN	NaN
3.886	38.6457	-146.5691	1308.9008	-0.91171	0.56543	-0.13193	65.283	-11.2606	19.1826	-0.055176	0.13428	0.10498	173.364	-57.11	1092.985	-2.4429	1.8423	-0.053223	NaN	NaN	NaN	NaN	NaN	NaN
3.888	29.7039	-124.9468	1301.6973	-0.99463	0.59619	-0.15283	61.918	17.7059	6.60726	-0.055908	0.13892	0.094726	167.858	-69.52	1176.9893	-2.1196	1.7036	0.002686	NaN	NaN	NaN	NaN	NaN	NaN
3.89	6.5465	-114.581	1308.73181	-1.104	0.66006	-0.16748	37.362	36.6742	-2.0364	-0.064941	0.14258	0.088379	134.736	-102.98	1204.348	-1.7905	1.5298	0.04834	NaN	NaN	NaN	NaN	NaN	NaN
3.892	8.8368	-110.826	1323.129	-1.2269	0.73965	-0.17627	66.677	-7.3922	17.7788	-0.071289	0.1416	0.075195	104.57	-144.193	1224.614	-1.4414	1.3398	0.076172	NaN	NaN	NaN	NaN	NaN	NaN
3.894	35.982	-119.528	1341.264	-1.346	0.82597	-0.19424	23.06821	57.498	7.5105	-0.069824	0.146	0.072754	130.75	-185.999	1178.377	-1.3145	1.2725	0.10107	NaN	NaN	NaN	NaN	NaN	NaN
3.896	19.345	-101.9686	1319.937	-1.4686	0.92783	-0.21162	45.088	24.327	8.389	-0.07959	0.15527	0.06543	134.866	-292.246	1207.0123	-1.1479	1.186	0.18262	NaN	NaN	NaN	NaN	NaN	NaN
3.898	13.027	-88.911	1314.819916	-1.6016	1.0449	-0.23047	40.25384	7.6387	1.616	-0.085205	0.16016	0.054443	138.87	-337.0584	1175.596	-1.0913	1.1421	0.20459	NaN	NaN	NaN	NaN	NaN	NaN
3.9	-15.483	-64.987	1310.675	-1.7439	1.1666	-0.24395	0.74	51.77	-13.18875	-0.095215	0.17188	0.042969	134.118	-365.3076	1220.059	-1.0308	1.1235	0.20117	NaN	NaN	NaN	NaN	NaN	NaN
3.902	-5.029	-51.925	1337.2756	-1.8749	1.2794	-0.2499	29.25349	-28.3009	11.5989	-0.11328	0.18555	0.025391	134.617	-376.783	1235.001	-0.8999	1.0845	0.15918	NaN	NaN	NaN	NaN	NaN	NaN
3.904	-27.2379	-58.202	1346.431	-1.9936	1.3856	-0.25772	-0.856999999999999	-5.1074	8.5242	-0.11963	0.19336	0.015137	48.2813	-428.88	1299.552	-0.81006	1.0532	0.15088	NaN	NaN	NaN	NaN	NaN	NaN
3.906	-30.7641	-84.8311	1346.7764	-2.0768	1.4895	-0.27363	-29.5502	13.376	7.5956	-0.1377	0.21631	-0.0048828	10.7815	-475.33	1360.149	-0.62793	0.97266	0.11377	NaN	NaN	NaN	NaN	NaN	NaN
3.908	-40.859	-107.675	1351.9748	-2.127	1.5742	-0.27002	-3.94	-48.824	52.986	-0.16211	0.23535	-0.013183	-38.9967	-482.05	1409.839	-0.51099	0.90063	0.072022	NaN	NaN	NaN	NaN	NaN	NaN
3.91	-43.286	-95.743	1372.5488	-2.0674	1.6358	-0.24619	-26.4953	-12.3355	58.4781	-0.18896	0.25244	-0.025391	-88.4285	-398.241	1400.7	-0.42578	0.81641	0.0053711	NaN	NaN	NaN	NaN	NaN	NaN
3.912	-56.371	-73.511	1373.637	-2.0804	1.654	-0.27491	-25.1742	-51.347	97.7418	-0.25146	0.27393	-0.055176	-116.286	-310.992	1418.163	-0.36816	0.729	-0.091309	NaN	NaN	NaN	NaN	NaN	NaN
3.914	-66.1703	-58.5712	1379.157	-2.1335	1.7056	-0.35889	-10.667	-26.1834	125.965	-0.29443	0.28564	-0.069824	-151.998	-233.518	1423.3391	-0.36914	0.69922	-0.14063	NaN	NaN	NaN	NaN	NaN	NaN
3.916	-60.8847	-65.742	1391.615	-2.0815	1.7338	-0.36563	-39.508	56.217	138.26	-0.3877	0.31641	-0.1123	-151.402	-206.731	1442.731	-0.42578	0.69678	-0.22119	NaN	NaN	NaN	NaN	NaN	NaN
3.918	-67.098	-85.728	1393.1559	-2.0273	1.7188	-0.33301	-44.8793	-20.5009	255.6162	-0.47486	0.34253	-0.14331	-104.26	-159.741	1440.249	-0.52051	0.73951	-0.26221	NaN	NaN	NaN	NaN	NaN	NaN
3.92	-61.5889	-92.701	1382.1415	-1.9887	1.7004	-0.30859	-76.3409	-4.6543	356.142	-0.58447	0.37402	-0.16699	-85.173	-154.154	1465.568	-0.64893	0.81787	-0.26709	NaN	NaN	NaN	NaN	NaN	NaN
3.922	-63.6813	-85.594	1378.2455	-1.951	1.6813	-0.29834	-82.8689	7.841	461.191	-0.76953	0.42773	-0.19824	-59.164	-139.866	1493.825	-0.8374	0.94775	-0.27881	NaN	NaN	NaN	NaN	NaN	NaN
3.924	-66.67	-62.3256	1390.06	-1.8979	1.6501	-0.28662	-35.63	-20.52038	621.775	-0.88281	0.46582	-0.21777	-65.668	-162.786	1547.262	-0.92773	1.0098	-0.27539	NaN	NaN	NaN	NaN	NaN	NaN
3.926	-69.078	-36.4973	1380.475	-1.836	1.6043	-0.27393	-60.753	29.956	723.217	-1.1226	0.5708	-0.24854	-60.0807	-145.0189	1516.247	-1.103	1.1626	-0.2749	NaN	NaN	NaN	NaN	NaN	NaN
3.928	-73.1047	-17.6537	1359.0237	-1.7749	1.5435	-0.25635	-48.354	-33.064	840.0351	-1.3172	0.6731	-0.26197	-52.6735	-158.2035	1499.289	-1.2353	1.2788	-0.29761	NaN	NaN	NaN	NaN	NaN	NaN
3.93	-66.342	-19.4484	1358.2539	-1.7171	1.4712	-0.23506	-25.987	-55.887	914.4588	-1.5156	0.77734	-0.27051	-26.2164	-139.607	1531.073	-1.3569	1.3872	-0.32666	NaN	NaN	NaN	NaN	NaN	NaN
3.932	-52.38	-19.9767	1362.0787	-1.6668	1.4055	-0.22237	-34.9928	2.628	966.5583	-1.7651	0.92627	-0.25928	-46.263	-166.678	1595.3044	-1.5239	1.522	-0.3667	NaN	NaN	NaN	NaN	NaN	NaN
3.934	-32.156	-19.075156	1368.069	-1.6278	1.3555	-0.20635	28.362	-58.783	1026.944	-1.8828	0.99707	-0.25635	-57.17659	-161.552	1673.562	-1.623	1.5918	-0.38477	NaN	NaN	NaN	NaN	NaN	NaN
3.936	-30.837	-7.2784	1362.266	-1.5922	1.3101	-0.20196	35.1802	-66.939	1062.164	-2.064	1.1411	-0.25049	-29.682	-154.2455	1697.234	-1.8398	1.7324	-0.41016	NaN	NaN	NaN	NaN	NaN	NaN
3.938	-47.075	-11.9654	1318.5663	-1.5664	1.2695	-0.19336	74.4893	-109.645	1050.49	-2.1606	1.2553	-0.24243	12.373	-121.7284	1746.128	-2.0263	1.8447	-0.42724	NaN	NaN	NaN	NaN	NaN	NaN
3.94	-36.815	-13.9353	1319.052	-1.5362	1.2407	-0.18672	143.789	-168.716	1063.847	-2.2065	1.356	-0.23633	57.392	-129.415	1767.501	-2.2148	1.9727	-0.43359	NaN	NaN	NaN	NaN	NaN	NaN
3.942	-19.218	-10.3147	1290.886	-1.5153	1.2121	-0.17891	110	-103.318	1060.289	-2.1753	1.4341	-0.23438	87.0404	-103.14	1778.215	-2.4429	2.1587	-0.39307	NaN	NaN	NaN	NaN	NaN	NaN
3.944	-27.996	-12.6083	1302.0958	-1.4922	1.1906	-0.17344	123.5366	-157.921	1057.386	-2.1147	1.4478	-0.23877	73.146	-86.905	1732.425	-2.5083	2.2349	-0.35107	NaN	NaN	NaN	NaN	NaN	NaN
3.946	-46.986	-2.8638	1294.888	-1.4666	1.168	-0.16719	147.227	-174.573	1041.712	-1.9258	1.3945	-0.24268	85.023	-44.9456	1703.6823	-2.6094	2.2969	-0.26953	NaN	NaN	NaN	NaN	NaN	NaN
3.948	-27.772	-0.526999999999999	1291.224	-1.4409	1.147	-0.16748	135.06	-140.995	1008.422	-1.7598	1.3364	-0.22924	64.9995	-33.891	1686.802	-2.7969	2.4356	-0.38184	NaN	NaN	NaN	NaN	NaN	NaN
3.95	-34.306	25.1475	1256.7821	-1.4132	1.1253	-0.16231	137.795	-150.594	1022.5895	-1.6133	1.2891	-0.20459	62.7149	-12.3632	1703.524	-2.8179	2.5063	-0.40527	NaN	NaN	NaN	NaN	NaN	NaN
3.952	-46.697	15.144	1248.1742	-1.391	1.108	-0.15732	151.652	-63.665	1009.266	-1.4941	1.2578	-0.16797	62.49	-8.3452	1698.594	-2.7378	2.5181	-0.32373	NaN	NaN	NaN	NaN	NaN	NaN
3.954	-37.991	8.3554	1223.2691	-1.3715	1.0916	-0.15732	106.968	-39.29	1008.495	-1.4668	1.2578	-0.14209	46.367	41.163	1693.484	-2.6792	2.4849	-0.28076	NaN	NaN	NaN	NaN	NaN	NaN
3.956	-19.499	19.1601	1215.86919	-1.3505	1.0739	-0.15459	95.289	-95.354	1025.993	-1.4316	1.25	-0.087891	15.777	65.922	1661.709	-2.5425	2.4126	-0.26367	NaN	NaN	NaN	NaN	NaN	NaN
3.958	-28.478	32.6007	1209.1259	-1.3398	1.0586	-0.15479	35.8226	-82.898	977.6292	-1.4041	1.2385	-0.06128	-30.6671	74.422	1675.477	-2.392	2.3422	-0.26953	NaN	NaN	NaN	NaN	NaN	NaN
3.96	-50.011	48.286	1191.863	-1.3209	1.0365	-0.14824	41.2203	-138.955	980.1639	-1.355	1.2192	-0.04248	-50.5865	70.082	1699.133	-2.2163	2.2603	-0.28564	NaN	NaN	NaN	NaN	NaN	NaN
3.962	-54.596	59.195	1201.5922	-1.3	1.0172	-0.14834	74.209	-150.06	987.9373	-1.2393	1.1758	-0.026367	-69.3588	59.114	1729.626	-2.0059	2.0703	-0.29541	NaN	NaN	NaN	NaN	NaN	NaN
3.964	-40.232	58.4263	1185.54766	-1.2746	0.99726	-0.14522	27.624	-151.285	1001.636	-1.1719	1.1445	-0.025879	-60.966	47.2499	1694.9776	-1.9214	1.9536	-0.28076	NaN	NaN	NaN	NaN	NaN	NaN
3.966	-46.155	63.3588	1159.2346	-1.2446	0.97119	-0.14365	70.471	-224.3107	1069.3157	-1.0288	1.0786	-0.013184	-83.8071	36.402	1719.8431	-1.814	1.7388	-0.23877	NaN	NaN	NaN	NaN	NaN	NaN
3.968	-58.8141	70.232	1120.274	-1.2148	0.94629	-0.14258	68.149	-240.151524	1068.1031	-0.91895	1.0098	0.0029297	-128.309	6.175	1682.467	-1.7403	1.5742	-0.19239	NaN	NaN	NaN	NaN	NaN	NaN
3.97	-63.8961	76.0081	1104.237	-1.1864	0.921	-0.14043	45.8279	-262.32	1090.725	-0.88086	0.98047	0.0043945	-145.455	13.497	1652.759	-1.7036	1.4751	-0.18018	NaN	NaN	NaN	NaN	NaN	NaN
3.972	-43.61488	73.278	1098.9349	-1.1593	0.89502	-0.13565	67.516	-311.332	1155.204	-0.82568	0.92236	-0.003418	-127.801	16.616	1602.246	-1.6758	1.418	-0.20898	NaN	NaN	NaN	NaN	NaN	NaN
3.974	-51.5087	59.1601	1102.9274	-1.1389	0.87002	-0.13174	8.5784	-282.597	1195.793	-0.79907	0.87719	-0.025635	-125.676	28.898	1588.4821	-1.6557	1.3921	-0.21924	NaN	NaN	NaN	NaN	NaN	NaN
3.976	-51.78427	62.6817	1082.4942	-1.1181	0.84521	-0.12539	-16.249	-276.323	1242.143	-0.77734	0.83789	-0.047852	-110.3098	38.532	1586.664	-1.6362	1.3774	-0.2207	NaN	NaN	NaN	NaN	NaN	NaN
3.978	-6.941	75.5926	1069.6232	-1.1011	0.82471	-0.11914	-33.77998	-232.009	1270.684	-0.75439	0.77881	-0.091797	-103.534	48.2605	1589.166	-1.627	1.3477	-0.21484	NaN	NaN	NaN	NaN	NaN	NaN
3.98	-3.997	94.6027	1052.6171	-1.0848	0.80302	-0.11494	-53.054	-171.468	1286.474	-0.74805	0.75977	-0.11133	-111.794	94.383	1506.5682	-1.623	1.3418	-0.21289	NaN	NaN	NaN	NaN	NaN	NaN
3.982	-28.857	104.2166	1023.206	-1.0688	0.77969	-0.11192	-18.6787	-197.838	1337.2	-0.74902	0.70703	-0.16992	-101.183	141.775	1483.049	-1.5942	1.3423	-0.2124	NaN	NaN	NaN	NaN	NaN	NaN
3.984	-28.5789	110.595	1019.1206	-1.0481	0.75664	-0.10488	-28.41736	-194.073	1349.4399	-0.76026	0.68897	-0.19482	-66.6652	203.8033	1461.998	-1.5577	1.333	-0.21338	NaN	NaN	NaN	NaN	NaN	NaN
3.986	7.029	105.2318	1001.1874	-1.028	0.73779	-0.10127	-30.522	-173.481	1359.254	-0.80615	0.69385	-0.2207	-38.2013	219.557	1463.895	-1.5073	1.3169	-0.20996	NaN	NaN	NaN	NaN	NaN	NaN
3.988	-4.366	105.0803	974.735	-1.0059	0.71484	-0.10107	35.63	-175.6479	1390.15	-0.91016	0.72656	-0.24121	11.963	259.731	1408.734	-1.4399	1.2798	-0.2002	NaN	NaN	NaN	NaN	NaN	NaN
3.99	-8.105	97.4895	952.6703	-0.98477	0.69023	-0.099513	28.812	-127.671	1403.71	-0.97412	0.74658	-0.25586	43.57291	246.478	1372.7	-1.4058	1.2544	-0.18994	NaN	NaN	NaN	NaN	NaN	NaN
3.992	8.0637	115.456	932.8022	-0.95723	0.67227	-0.10381	19.9821	-137.8731	1438.3645	-1.125	0.81445	-0.27148	61.534	252.341	1322.32	-1.3516	1.209	-0.1875	NaN	NaN	NaN	NaN	NaN	NaN
3.994	21.937	122.7527	919.80081	-0.93574	0.64531	-0.10146	64.915	-157.7051	1465.519	-1.2683	0.88306	-0.29346	86.78	222.394	1326.7348	-1.3103	1.1711	-0.17968	NaN	NaN	NaN	NaN	NaN	NaN
3.996	21.666	140.4865	885.9076	-0.90732	0.62588	-0.10088	59.283	-139.6382	1493.409	-1.4292	0.97314	-0.31592	92.566	234.883	1302.448	-1.269	1.1382	-0.17285	NaN	NaN	NaN	NaN	NaN	NaN
[truncated: 28,002 more rows]
