# Supplementary material for: Reliability and Validity of Running Cadence and Stance Time Derived from Instrumented Wireless Earbuds
Source: Sensors (Basel). 2021 Nov 30;21(23):7995. doi: 10.3390/s21237995 (PMC8659722; doi:10.3390/s21237995)
Supplement: Supplementary file 1 [file sensors-21-07995-s001.zip › Data_P13_speeds_2.csv]

time	S7kmh_force_plate_1	S7kmh_force_plate_2	S7kmh_force_plate_3	S7kmh_earbuds_1	S7kmh_earbuds_2	S7kmh_earbuds_3	S10kmh_force_plate_1	S10kmh_force_plate_2	S10kmh_force_plate_3	S10kmh_earbuds_1	S10kmh_earbuds_2	S10kmh_earbuds_3	S13kmh_force_plate_1	S13kmh_force_plate_2	S13kmh_force_plate_3	S13kmh_earbuds_1	S13kmh_earbuds_2	S13kmh_earbuds_3	max_force_plate_1	max_force_plate_2	max_force_plate_3	max_earbuds_1	max_earbuds_2	max_earbuds_3
0	2.792	-74.434	975.1786	-2.0723	1.3867	-0.14551	-1.556	61.409	-7.0238	0.013184	0.010254	0.11914	3.475	280.8957	694.654	-0.4602	0.56128	-0.12183	NaN	NaN	NaN	NaN	NaN	NaN
0.002	23.467	-103.77	978.5455	-2.0613	1.4663	-0.16182	35.221	5.3298	29.8533	-0.0056152	0.041992	0.11988	-25.6729	269.0618	677.739	-0.41162	0.50635	-0.11963	NaN	NaN	NaN	NaN	NaN	NaN
0.004	11.084	-115.871	998.8437	-1.9945	1.4797	-0.18242	1.977	27.1441	32.4073	-0.027344	0.066895	0.11377	-39.1478	287.442	638.7025	-0.36133	0.43359	-0.12598	NaN	NaN	NaN	NaN	NaN	NaN
0.006	-10.704	-95.972	1016.123	-1.8742	1.4344	-0.20898	-14.874	43.9752	29.2879	-0.052734	0.10449	0.10596	-73.456	270.741	604.728	-0.33301	0.39355	-0.12744	NaN	NaN	NaN	NaN	NaN	NaN
0.008	-37.306	-107.468	1029.3534	-1.7317	1.3409	-0.23486	43.251	12.1304	25.1965	-0.0625	0.12305	0.10352	-76.5147	278.762	532.1176	-0.29346	0.32568	-0.13037	NaN	NaN	NaN	NaN	NaN	NaN
0.01	-52.5277	-111.9757	1054.15179	-1.5859	1.2324	-0.25049	-10.357	65.206	10.0338	-0.084473	0.15332	0.10059	-80.837	267.105	506.164	-0.26025	0.27613	-0.13599	NaN	NaN	NaN	NaN	NaN	NaN
0.012	-58.8152	-128.76	1067.9526	-1.4684	1.1258	-0.24668	-3.198	35.1062	22.9195	-0.097412	0.17236	0.095703	-61.6418	283.705	469.392	-0.23145	0.22803	-0.14453	NaN	NaN	NaN	NaN	NaN	NaN
0.014	-74.238	-129.424	1074.1819	-1.3862	1.0379	-0.22568	-0.335999999999999	15.47668	33.0101	-0.11035	0.19141	0.095703	-44.4632	257.801	457.978	-0.19092	0.17627	-0.14014	NaN	NaN	NaN	NaN	NaN	NaN
0.016	-62.3649	-138.84	1085.464	-1.3471	0.97853	-0.19052	-43.775	60.347	1.9689	-0.12744	0.20654	0.083008	-36	247.2101	379.884	-0.17725	0.14746	-0.14355	NaN	NaN	NaN	NaN	NaN	NaN
0.018	-84.2674	-154.5441	1112.11	-1.3331	0.95283	-0.16758	-22.05	4.95157	46.62437	-0.13574	0.20703	0.080566	-22.9244	201.8333	338.196	-0.14404	0.098633	-0.14258	NaN	NaN	NaN	NaN	NaN	NaN
0.02	-63.6591	-160.4504	1131.499	-1.3198	0.94385	-0.15039	-23.156	-0.864000000000001	81.568	-0.15186	0.22168	0.078125	-8.992	181.673	283.7634	-0.12426	0.065918	-0.14185	NaN	NaN	NaN	NaN	NaN	NaN
0.022	-73.764	-132.64487	1173.52341	-1.2902	0.95869	-0.12578	-78.5455	-16.1665	110.662	-0.16284	0.22436	0.070069	12.1446	149.5434	289.997	-0.11279	0.037109	-0.13867	NaN	NaN	NaN	NaN	NaN	NaN
0.024	-47.5649	-139.799	1191.7763	-1.2472	0.97549	-0.11387	-28.315	-28.044	167.4717	-0.1748	0.22754	0.061035	31.024	160.218	226.238	-0.097168	0.0058594	-0.13477	NaN	NaN	NaN	NaN	NaN	NaN
0.026	-21.864	-139.249	1202.26115	-1.1925	0.98408	-0.10332	-78.3854	29.621	200.8291	-0.19189	0.23779	0.038574	34.422	156.891	197.4888	-0.10156	-0.01416	-0.13477	NaN	NaN	NaN	NaN	NaN	NaN
0.028	-26.18	-145.118	1214.1084	-1.1338	0.97949	-0.094532	-110.35	12.9113	295.9284	-0.2002	0.24121	0.03125	23.276	157.2948	152.24315	-0.11426	-0.04248	-0.14014	NaN	NaN	NaN	NaN	NaN	NaN
0.03	-42.4137	-132.883	1236.17094	-1.0771	0.96875	-0.081055	-99.6259	13.9246	416.8735	-0.229	0.25928	0.010742	-20.868	117.6493	146.1097	-0.12329	-0.063477	-0.13305	NaN	NaN	NaN	NaN	NaN	NaN
0.032	-46.17	-141.1032	1273.5269	-1.0379	0.94844	-0.066016	-134.8947	67.6626	533.907	-0.26075	0.27465	-0.0095215	19.716	113.916	121.3051	-0.13818	-0.076172	-0.12402	NaN	NaN	NaN	NaN	NaN	NaN
0.034	-3.351	-128.6157	1302.112	-1.007	0.93643	-0.052149	-82.765	23.145	697.516	-0.2998	0.29297	-0.035645	31.6725	85.84	110.201	-0.17041	-0.094238	-0.11426	NaN	NaN	NaN	NaN	NaN	NaN
0.036	-17.02	-124.94	1317.552	-0.98779	0.9251	-0.039258	-110.667	23.6688	814.662	-0.37451	0.32959	-0.081543	50.6922	76.0412	80.9745	-0.18408	-0.098633	-0.11377	NaN	NaN	NaN	NaN	NaN	NaN
0.038	-2.826	-118.53	1334.241	-0.97022	0.92198	-0.025586	-129.6491	-20.6447	920.702	-0.4165	0.354	-0.10645	23.6631	33.722	93.1408	-0.21143	-0.099121	-0.10449	NaN	NaN	NaN	NaN	NaN	NaN
0.04	-0.779	-126.858	1339.9367	-0.95215	0.91016	-0.01123	-67.629	-81.472	1013.0006	-0.52295	0.40674	-0.15283	18.303	36.6987	58.94	-0.22828	-0.097656	-0.096191	NaN	NaN	NaN	NaN	NaN	NaN
0.042	6.211	-110.867	1333.264	-0.91455	0.89189	-0.0051757	-87.951	-17.111	1077.562	-0.62598	0.45239	-0.19068	-15.376	29.3174	26.181	-0.24463	-0.081543	-0.10059	NaN	NaN	NaN	NaN	NaN	NaN
0.044	3.737	-96.4834	1331.942	-0.86435	0.85713	0.0020508	-65.545	-23.22	1148.144	-0.74805	0.51074	-0.22168	32.253	40.62	-8.119	-0.25488	-0.071289	-0.098633	NaN	NaN	NaN	NaN	NaN	NaN
0.046	-0.999000000000002	-82.8175	1358.1407	-0.80615	0.7997	-0.00029297	-23.2969	-42.013	1155.669	-0.95166	0.61865	-0.26025	2.1	6.859	32.523	-0.25537	-0.061523	-0.10742	NaN	NaN	NaN	NaN	NaN	NaN
0.048	17.816	-92.54	1373.961	-0.75469	0.72734	-0.010058	5.9939	-49.8898	1163.875	-1.0742	0.67969	-0.27441	-15.357	22.392	30	-0.2666	-0.041016	-0.12109	NaN	NaN	NaN	NaN	NaN	NaN
0.05	20.821	-92.225	1380.8369	-0.71875	0.65527	-0.021973	67.5646	-128.293	1172.812	-1.3281	0.83008	-0.29785	-49.42	-6.022	33.6	-0.27246	-0.033203	-0.12964	NaN	NaN	NaN	NaN	NaN	NaN
0.052	13.592	-76.069	1389.9834	-0.71084	0.58408	-0.037109	91.042	-119.817	1172.354	-1.541	0.94385	-0.29321	-44.823	24.568	2.187	-0.28467	-0.024902	-0.13721	NaN	NaN	NaN	NaN	NaN	NaN
0.054	-3.638	-62.3721	1386.718	-0.74063	0.52578	-0.054883	68.274	-152.013	1170.004	-1.7891	1.0537	-0.26904	-98.5	-5.9408	20.3478	-0.30908	-0.016602	-0.14307	NaN	NaN	NaN	NaN	NaN	NaN
0.056	-5.646	-50.9063	1412.4903	-0.79414	0.48633	-0.067774	132.032	-212.47	1165.394	-2.1206	1.2349	-0.23584	-88.8945	16.2173	34.318	-0.32178	-0.0087891	-0.14795	NaN	NaN	NaN	NaN	NaN	NaN
0.058	-30.143	-36.839	1413.5035	-0.88193	0.47549	-0.07959	122.48	-180.724	1130.4925	-2.2617	1.3398	-0.23193	-80.1623	13.306	43.8193	-0.35986	0.0043945	-0.15137	NaN	NaN	NaN	NaN	NaN	NaN
0.06	-82.8065	-42.632	1407.3574	-0.99463	0.49072	-0.089355	127.873	-180.8746	1124.936	-2.4663	1.5435	-0.2041	-70.5698	62.368	1.605	-0.39771	0.012207	-0.15625	NaN	NaN	NaN	NaN	NaN	NaN
0.062	-81.7596	-53.183	1425.5688	-1.1371	0.53125	-0.091992	174.528	-120.208	1133.192	-2.5322	1.6612	-0.19189	-84.188	53.688	15.688	-0.43555	0.027832	-0.14795	NaN	NaN	NaN	NaN	NaN	NaN
0.064	-96.8866	-67.5861	1423.579	-1.296	0.58174	-0.10791	109.743	-52.996	1130.305	-2.5107	1.748	-0.18994	-89.377	68.199	21.518	-0.48779	0.056152	-0.13818	NaN	NaN	NaN	NaN	NaN	NaN
0.066	-95.14442	-55.0081	1416.8045	-1.4663	0.64424	-0.13721	120.435	-93.261	1179.6154	-2.2988	1.7871	-0.19873	-86.07651	29.9484	45.15179	-0.52197	0.082764	-0.12719	NaN	NaN	NaN	NaN	NaN	NaN
0.068	-113.773	-43.253	1402.5595	-1.6439	0.72813	-0.15987	99.039	-92.221	1167.94183	-2.1479	1.772	-0.17969	-57.153	73.288	23.6869	-0.55029	0.10156	-0.11133	NaN	NaN	NaN	NaN	NaN	NaN
0.07	-99.2848	-31.802	1401.079	-1.8428	0.83887	-0.17773	43.2492	-131.227	1155.366	-1.8159	1.6685	-0.13916	-55.013	42.6105	8.7339	-0.58447	0.13184	-0.10254	NaN	NaN	NaN	NaN	NaN	NaN
0.072	-102.12698	-34.075	1414.374	-2.0467	0.98437	-0.18428	103.184	-178.52474	1152.4758	-1.6226	1.563	-0.10571	-48.948	61.517	12.5871	-0.59131	0.14697	-0.09082	NaN	NaN	NaN	NaN	NaN	NaN
0.074	-98.215	-34.328	1422.383	-2.2476	1.1689	-0.19404	97.002	-190.9	1137.804	-1.4844	1.459	-0.070801	-53.5502	26.6605	34.5929	-0.60156	0.16992	-0.073242	NaN	NaN	NaN	NaN	NaN	NaN
0.076	-106.1518	-35.167	1432.5157	-2.4398	1.3845	-0.20302	111.564	-231.8964	1170.5329	-1.3945	1.3535	-0.032227	-50.4912	65.711	44.967	-0.58398	0.18677	-0.059326	NaN	NaN	NaN	NaN	NaN	NaN
0.078	-96.613	-19.444	1432.7488	-2.6028	1.6004	-0.21152	134.339	-242.8783	1194.7013	-1.3706	1.3198	-0.0024414	-28.391	36.79	34.357	-0.55957	0.19531	-0.045898	NaN	NaN	NaN	NaN	NaN	NaN
0.08	-85.9548	-2.1442	1430.1931	-2.7148	1.7852	-0.2124	90.223	-236.661	1208.765	-1.3184	1.2695	0.049805	-18.584	58.02	51.0329	-0.50732	0.19141	-0.029297	NaN	NaN	NaN	NaN	NaN	NaN
0.082	-119.0062	2.806	1428.3586	-2.7161	1.8921	-0.19014	78.7	-283.145	1259.872	-1.249	1.2237	0.069336	-23.457	15.3425	65.55831	-0.46973	0.18604	-0.019531	NaN	NaN	NaN	NaN	NaN	NaN
0.084	-123.9726	5.367	1410.6752	-2.6797	1.9289	-0.18828	59.683	-278.322	1300.479	-1.1504	1.1641	0.081055	-8.101	43.346	64.7687	-0.39209	0.1626	-0.010742	NaN	NaN	NaN	NaN	NaN	NaN
0.086	-108.3329	-6.621	1397.8528	-2.7515	1.9523	-0.30742	-11.699	-275.889	1329.1156	-0.98145	1.0723	0.084961	26.841	21.3263	40.9592	-0.32398	0.13159	-0.0075683	NaN	NaN	NaN	NaN	NaN	NaN
0.088	-90.06	11.8612	1393.6357	-2.6398	1.956	-0.35879	-1.742	-248.805	1382.333	-0.89258	1.0176	0.078125	17.769	40.2482	54.595	-0.25293	0.099121	-0.0063477	NaN	NaN	NaN	NaN	NaN	NaN
0.09	-79.281	26.924	1384.4677	-2.4141	1.8359	-0.28516	-41.386	-183.286	1380.993	-0.73438	0.91797	0.053711	8.127	-11.4412	53.517	-0.15918	0.044434	-0.0043945	NaN	NaN	NaN	NaN	NaN	NaN
0.092	-87.796	23.7737	1380.1461	-2.2069	1.6982	-0.22373	-71.51	-177.258	1402.1151	-0.64355	0.83642	0.016601	25.879	-5.201	69.902	-0.11182	0.016113	-0.0073242	NaN	NaN	NaN	NaN	NaN	NaN
0.094	-39.888	22.32853	1353.7388	-2.0363	1.5864	-0.21259	-20.9007	-170.771	1421.7807	-0.57227	0.75586	-0.025391	4.694	-17.5819	22.6341	-0.035156	-0.036133	0.0019531	NaN	NaN	NaN	NaN	NaN	NaN
0.096	-39.966	24.9365	1325.109	-1.9	1.5008	-0.21455	-34.732	-143.002	1417.087	-0.50732	0.66846	-0.083008	1.382	31.0553	24.011	0.020019	-0.075439	-0.0021973	NaN	NaN	NaN	NaN	NaN	NaN
0.098	-18.854	37.773	1327.6451	-1.7969	1.4336	-0.2043	-14.4823	-160.817	1456.16	-0.48828	0.62305	-0.11621	16.872	25.2363	27.089	0.071777	-0.10693	-0.0029297	NaN	NaN	NaN	NaN	NaN	NaN
0.1	-46.343	36.6248	1336.618	-1.7144	1.3735	-0.18701	6.4766	-114.015	1485.702	-0.48779	0.56104	-0.18994	-29.269	31.8341	69.4381	0.1333	-0.15723	-0.0053711	NaN	NaN	NaN	NaN	NaN	NaN
0.102	-30.309	49.1118	1321.857	-1.652	1.3118	-0.17519	-6.8641	-114.755	1492.98	-0.5105	0.52734	-0.22754	-36.507	0.494	28.74387	0.16357	-0.18115	-0.0073242	NaN	NaN	NaN	NaN	NaN	NaN
0.104	-49.013	55.457	1303.443	-1.589	1.261	-0.16475	51.332	-143.535	1512.1136	-0.55176	0.5127	-0.25586	-49.192	4.14169	27.513	0.21436	-0.22266	-0.0092773	NaN	NaN	NaN	NaN	NaN	NaN
0.106	-68.091	68.705	1286.4021	-1.5214	1.2208	-0.15928	42.54	-139.4297	1520.411	-0.63281	0.52441	-0.26953	-53.706	-1.7943	14.09037	0.25244	-0.25074	-0.014405	NaN	NaN	NaN	NaN	NaN	NaN
0.108	-64.468	52.643	1281.0082	-1.4549	1.1799	-0.1584	19.4474	-184.704	1564.104	-0.6875	0.53711	-0.2832	-61.97	11.518	58.243	0.28125	-0.28027	-0.022461	NaN	NaN	NaN	NaN	NaN	NaN
0.11	-74.735	62.148	1249.9894	-1.3979	1.1333	-0.15674	52.009	-184.379	1591.602	-0.84277	0.59912	-0.29541	-53.22	-0.855999999999998	25.937	0.30859	-0.3125	-0.026855	NaN	NaN	NaN	NaN	NaN	NaN
0.112	-62.216	63.248	1233.92099	-1.3605	1.0955	-0.15127	-7.5074	-155.1026	1586.2292	-1.0469	0.70508	-0.33203	-81.3036	20.5253	18.43	0.31787	-0.32178	-0.033203	NaN	NaN	NaN	NaN	NaN	NaN
0.114	-91.458	70.6353	1198.633	-1.3336	1.0592	-0.14297	6.852	-173.2085	1634.085	-1.1675	0.78027	-0.34326	-67.51458	15.654	-19.8139	0.31885	-0.34521	-0.039063	NaN	NaN	NaN	NaN	NaN	NaN
0.116	-79.081	69.3705	1190.5033	-1.3168	1.0314	-0.13593	67.596	-142.565	1633.23	-1.4585	0.99072	-0.34619	-89.419	10.915	12.323	0.3147	-0.35913	-0.04956	NaN	NaN	NaN	NaN	NaN	NaN
0.118	-77.548	74.226	1186.203	-1.3129	1.0088	-0.13301	28.0003	-143.039	1641.308	-1.7188	1.2022	-0.34814	-72.914	4.675	22.181	0.30713	-0.36182	-0.04541	NaN	NaN	NaN	NaN	NaN	NaN
0.12	-60.82	78.452	1159.2301	-1.3081	0.99072	-0.13232	83.114	-138.554	1646.174	-2.0054	1.4399	-0.35205	-61.584	17.8161	22.962	0.28564	-0.3667	-0.05127	NaN	NaN	NaN	NaN	NaN	NaN
0.122	-80.5406	80.509	1148.8456	-1.3006	0.97832	-0.12851	79.683	-112.4475	1617.956	-2.3999	1.7583	-0.35791	-56.266	50.7367	5.928	0.2749	-0.36133	-0.052246	NaN	NaN	NaN	NaN	NaN	NaN
0.124	-80.1489	94.4595	1127.0976	-1.2899	0.96182	-0.13379	39.028	-131.111	1608.853	-2.5879	1.9043	-0.35938	-96.724	49.474	12.863	0.25098	-0.35303	-0.056641	NaN	NaN	NaN	NaN	NaN	NaN
0.126	-75.3886	111.0088	1113.4781	-1.2763	0.94424	-0.1291	60.164	-107.716	1601.229	-2.8965	2.1465	-0.33496	-66.8374	49.902	12.8538	0.23047	-0.34082	-0.057862	NaN	NaN	NaN	NaN	NaN	NaN
0.128	-91.58951	110.593	1112.501	-1.2621	0.93711	-0.1292	22.58	-65.879	1577.739	-2.9724	2.2561	-0.27978	-67.0266	35.8917	41.5735	0.21338	-0.32373	-0.060547	NaN	NaN	NaN	NaN	NaN	NaN
0.13	-97.4717	102.5888	1089.588	-1.25	0.9248	-0.12451	48.223	-64.888	1569.865	-2.6929	2.2798	-0.12744	-35.316	55.97	12.7077	0.19043	-0.30078	-0.067383	NaN	NaN	NaN	NaN	NaN	NaN
0.132	-101.2314	94.6092	1065.11637	-1.2433	0.9209	-0.12207	37.045	-31.3453	1574.331	-2.957	2.2617	-0.27734	-32.218	50.994	12.363	0.18311	-0.2876	-0.067871	NaN	NaN	NaN	NaN	NaN	NaN
0.134	-80.4369	109.4454	1049.27289	-1.233	0.9125	-0.1125	-21.3736	-21.761	1576.369	-2.9644	2.3774	-0.41553	2.236	72.707	27.96	0.16846	-0.26074	-0.071289	NaN	NaN	NaN	NaN	NaN	NaN
0.136	-69.3572	119.4594	1010.7526	-1.226	0.90195	-0.11015	-4.5519	-26.615	1619.7279	-2.7031	2.3379	-0.36621	-17.421	47.119	36.578	0.1604	-0.2478	-0.07959	NaN	NaN	NaN	NaN	NaN	NaN
0.138	-66.3796	130.3302	1008.4661	-1.2133	0.89268	-0.10313	-28.2691	17.136	1610.5656	-2.5629	2.2016	-0.24707	6.072	67.71117	23.9595	0.1543	-0.23242	-0.082031	NaN	NaN	NaN	NaN	NaN	NaN
0.14	-19.658	123.0034	976.87258	-1.1978	0.88232	-0.093262	-70.179	-8.711	1593.9397	-2.4565	2.1177	-0.1709	8.30399999999999	34.6292	29.1051	0.15967	-0.21484	-0.087402	NaN	NaN	NaN	NaN	NaN	NaN
0.142	-5.793	122.3788	948.7981	-1.1828	0.86562	-0.083399	-39.227	-43.5355	1605.075	-2.3359	2.0664	-0.15527	23.252	58.0723	23.629	0.16699	-0.21191	-0.09375	NaN	NaN	NaN	NaN	NaN	NaN
0.144	-3.783	130.346	937.0768	-1.1621	0.84707	-0.076172	-80.053	-33.6512	1570.582	-2.2695	2.0352	-0.1499	10.319	12.5947	66.43	0.16309	-0.20996	-0.104	NaN	NaN	NaN	NaN	NaN	NaN
0.146	-20.681	130.9297	920.6514	-1.1457	0.82676	-0.071094	-76.0673	-59.7256	1582.2422	-2.0991	1.9419	-0.1665	28.004	28.763	74.346	0.15771	-0.2041	-0.10669	NaN	NaN	NaN	NaN	NaN	NaN
0.148	16.029	133.4934	895.4521	-1.1195	0.79688	-0.058398	-10.5406	-14.343	1571.9701	-1.9677	1.8106	-0.15381	-20.861	13.56802	54.202	0.15527	-0.19385	-0.11084	NaN	NaN	NaN	NaN	NaN	NaN
0.15	12.787	135.3863	890.6346	-1.0854	0.76709	-0.058105	-53.475	-2.346	1537.073	-1.8574	1.6797	-0.12891	-9.842	49.192	59.168	0.13135	-0.17334	-0.11914	NaN	NaN	NaN	NaN	NaN	NaN
0.152	-5.964	137.246	878.2098	-1.0491	0.73223	-0.052832	-25.66387	-22.302	1563.442	-1.7358	1.5435	-0.125	-17.559	5.28683	57.0456	0.1167	-0.15771	-0.12012	NaN	NaN	NaN	NaN	NaN	NaN
0.154	0.874000000000002	132.136	850.0458	-1.0103	0.7	-0.05	-42.942	15.1282	1537.402	-1.6895	1.4902	-0.1377	-17.253	14.758	48.7962	0.081543	-0.12646	-0.11377	NaN	NaN	NaN	NaN	NaN	NaN
0.156	4.645	136.693	820.2557	-0.97598	0.66328	-0.047656	-70.1417	18.87769	1531.4264	-1.6069	1.3989	-0.15527	-35.829	-12.9335	35.9123	0.050293	-0.097657	-0.11596	NaN	NaN	NaN	NaN	NaN	NaN
0.158	-12.545	145.281	794.9144	-0.94082	0.62441	-0.046777	-7.022	52.785	1504.5513	-1.5632	1.3537	-0.15943	-24.671	37.7798	41.7939	0.018555	-0.067871	-0.11816	NaN	NaN	NaN	NaN	NaN	NaN
0.16	-22.687	148.185	762.3941	-0.90625	0.59473	-0.042969	-53.4076	94.146	1479.7425	-1.5356	1.3071	-0.15869	-40.9029	2.315	50.53	-0.01709	-0.021484	-0.11621	NaN	NaN	NaN	NaN	NaN	NaN
0.162	3.695	130.6347	740.75631	-0.87422	0.55937	-0.041016	-45.0848	75.727	1455.5915	-1.5195	1.2578	-0.16211	-45.703	23.116	62.612	-0.035645	0.00048828	-0.12061	NaN	NaN	NaN	NaN	NaN	NaN
0.164	-9.25	135.5955	703.275	-0.84179	0.5252	-0.040528	-14.546	109.232	1431.8695	-1.5122	1.2407	-0.16309	-68.781	-28.6916	43.538	-0.068359	0.035156	-0.12305	NaN	NaN	NaN	NaN	NaN	NaN
0.166	2.861	133.129	682.668	-0.81563	0.49512	-0.04248	-18.9986	140.787	1384.766	-1.5029	1.207	-0.16992	-65.818	11.979	9.0722	-0.090822	0.064453	-0.125	NaN	NaN	NaN	NaN	NaN	NaN
0.168	-24.679	143.925	682.1188	-0.78369	0.46748	-0.040723	46.999	118.564	1379.0732	-1.4944	1.1751	-0.17285	-70.6935	-11.664	-4.739	-0.1123	0.082031	-0.13086	NaN	NaN	NaN	NaN	NaN	NaN
0.17	-19.948	145.062	657.8706	-0.76172	0.44189	-0.03418	31.288	139.088	1379.10229	-1.478	1.147	-0.17334	-50.8187	33.8981	34.386	-0.13574	0.10547	-0.12695	NaN	NaN	NaN	NaN	NaN	NaN
0.172	-22.203	164.6601	644.3877	-0.72754	0.41182	-0.043652	25.3126	125.3888	1352.1338	-1.4531	1.1133	-0.17627	-71.9921	-13.3951	67.8	-0.14355	0.11426	-0.12793	NaN	NaN	NaN	NaN	NaN	NaN
0.174	-44.2144	164.4097	605.966306	-0.7	0.38242	-0.039063	76.133	116.7678	1365.2995	-1.4395	1.1006	-0.17676	-93.1949	-15.12356	85.684	-0.16309	0.12305	-0.12549	NaN	NaN	NaN	NaN	NaN	NaN
0.176	-68.47652	152.061	590.65785	-0.67188	0.36094	-0.039844	63.191	146.3395	1322.301	-1.4136	1.0806	-0.18018	-116.34	-41.32	111.849	-0.17212	0.12915	-0.13208	NaN	NaN	NaN	NaN	NaN	NaN
0.178	-71.3906	159.447	559.1439	-0.64414	0.33437	-0.041894	75.654	93.289	1311.644	-1.3972	1.0656	-0.18188	-73.0879	28.067	190.036	-0.18359	0.13379	-0.14014	NaN	NaN	NaN	NaN	NaN	NaN
0.18	-65.7082	172.508	539.9615	-0.61865	0.31201	-0.044922	67.063	122.95	1303.991	-1.375	1.0508	-0.18359	-29.379	27.6646	317.2231	-0.19922	0.13916	-0.15234	NaN	NaN	NaN	NaN	NaN	NaN
0.182	-79.2704	161.255	512.8316	-0.59746	0.28808	-0.047266	24.3089	157.1693	1254.9607	-1.3457	1.0303	-0.17822	-50.649	71.088	478.758	-0.20898	0.14746	-0.16016	NaN	NaN	NaN	NaN	NaN	NaN
0.184	-67.906	148.8356	485.0551	-0.5708	0.27022	-0.048731	37.435	136.508	1246.9162	-1.3301	1.0186	-0.18018	-13.996	55.0751	600.044	-0.24365	0.1665	-0.16846	NaN	NaN	NaN	NaN	NaN	NaN
0.186	-55.7777	136.3983	463.386	-0.54736	0.24678	-0.051075	27.1249	171.127	1222.3524	-1.3062	1.0015	-0.17334	44.252	56.319	797.711	-0.29248	0.18433	-0.18286	NaN	NaN	NaN	NaN	NaN	NaN
0.188	-44.2149	143.7	431.774	-0.52061	0.2252	-0.05293	-5.2603	142.0685	1203.375	-1.2898	0.98901	-0.17139	81.977	7.3914	1012.402	-0.35986	0.2002	-0.19678	NaN	NaN	NaN	NaN	NaN	NaN
0.19	-35.184	137.275	417.173	-0.49756	0.20605	-0.052734	38.3728	142.8183	1203.834	-1.2734	0.97266	-0.16992	41.28	10.801	1223.0829	-0.48584	0.23975	-0.22363	NaN	NaN	NaN	NaN	NaN	NaN
0.192	-19.239	147.2659	403.4317	-0.46992	0.18584	-0.058789	18.2196	205.2559	1147.1003	-1.2515	0.9458	-0.1665	56.0466	-3.712	1328.409	-0.56641	0.26172	-0.23975	NaN	NaN	NaN	NaN	NaN	NaN
0.194	-0.459999999999997	141.1284	373.5545	-0.4414	0.16358	-0.058594	18.5044	183.908	1109.947	-1.2324	0.92969	-0.16895	-18.769	11.404	1422.2102	-0.75928	0.33057	-0.26318	NaN	NaN	NaN	NaN	NaN	NaN
0.196	-20.585	142.7521	354.6398	-0.40976	0.14795	-0.059375	36.1239	206.8785	1087.7873	-1.1836	0.89844	-0.15771	-47.006	-10.839	1487.956	-0.94944	0.40161	-0.27417	NaN	NaN	NaN	NaN	NaN	NaN
0.198	-13.093	138.012	339.6177	-0.38193	0.13408	-0.063379	-31.13	214.5487	1043.2341	-1.1465	0.8628	-0.15918	-93.39	-38.137	1549.075	-1.1631	0.49121	-0.28613	NaN	NaN	NaN	NaN	NaN	NaN
0.2	-21.114	127.113	324.9938	-0.35107	0.11865	-0.065918	7.6893	172.259	1027.107	-1.1074	0.82422	-0.15527	-117.332	-81.9291	1544.731	-1.4824	0.65332	-0.27783	NaN	NaN	NaN	NaN	NaN	NaN
0.202	10.956	123.266	316.34424	-0.31836	0.10068	-0.069727	19.2357	217.071	996.349	-1.0581	0.77783	-0.15527	-159.23	-143.931	1503.987	-1.6582	0.75195	-0.26172	NaN	NaN	NaN	NaN	NaN	NaN
0.204	-17.126	126.144	297.1781	-0.28936	0.088965	-0.072754	-21.89658	197.7778	955.319	-1.0322	0.75293	-0.15527	-147.738	-175.825	1456.219	-2.0273	0.98047	-0.21533	NaN	NaN	NaN	NaN	NaN	NaN
0.206	-13.866	119.729	277.7098	-0.25693	0.074902	-0.072754	-1.7745	164.6892	957.9933	-0.98779	0.71143	-0.15137	-175.292	-239.697	1452.583	-2.3035	1.1751	-0.16284	NaN	NaN	NaN	NaN	NaN	NaN
0.208	16.478	103.511	243.493	-0.23271	0.062793	-0.07373	-33.217	227.034	915.3672	-0.95361	0.68261	-0.14477	-171.138	-233.355	1382.981	-2.5854	1.3853	-0.10596	NaN	NaN	NaN	NaN	NaN	NaN
0.21	7.146	100.3342	226.711621	-0.20557	0.051758	-0.078613	-4.4914	182.9681	879.3287	-0.9248	0.6543	-0.13623	-159.671	-203.98	1328.263	-2.957	1.6719	-0.074707	NaN	NaN	NaN	NaN	NaN	NaN
0.212	17.11	95.4024	202.4561	-0.17715	0.042188	-0.07666	18.2926	205.985	861.45448	-0.88428	0.62256	-0.1377	-119.858	-148.998	1293.082	-3.1407	1.8418	-0.085693	NaN	NaN	NaN	NaN	NaN	NaN
0.214	5.105	81.2106	185.8784	-0.15489	0.032519	-0.07627	-10.22	201.0086	812.1385	-0.86914	0.60156	-0.13379	-175.721	-166.738	1306.208	-3.2246	1.9414	-0.11816	NaN	NaN	NaN	NaN	NaN	NaN
0.216	21.361	87.9857	185.7216	-0.13145	0.022363	-0.077051	41.807	133.602	806.011	-0.81641	0.5752	-0.1333	-228.845	-140.448	1299.271	-3.0684	1.916	-0.23633	NaN	NaN	NaN	NaN	NaN	NaN
0.218	-8.436	85.6966	175.17775	-0.11182	0.0125	-0.073926	56.069	196.507	745.2453	-0.78174	0.55078	-0.13549	-248.749	-171.694	1293.859	-2.8691	1.8398	-0.28711	NaN	NaN	NaN	NaN	NaN	NaN
0.22	-25.072	81.0162	175.7655	-0.095703	0.0053711	-0.074219	56.465	175.459	686.7166	-0.74023	0.52734	-0.12598	-230.036	-155.531	1279.202	-2.3687	1.5806	-0.36475	NaN	NaN	NaN	NaN	NaN	NaN
0.222	-13.653	72.2113	186.843	-0.080273	-0.0074219	-0.074805	95.443	147.045	659.153	-0.68311	0.49658	-0.12793	-229.789	-174.649	1300.376	-2.0176	1.3344	-0.42725	NaN	NaN	NaN	NaN	NaN	NaN
0.224	-45.1982	73.7767	164.4966	-0.06377	-0.015136	-0.072754	60.209	190.538	603.221	-0.64844	0.47656	-0.12988	-247.387	-202.229	1319.2669	-1.7046	1.0942	-0.48291	NaN	NaN	NaN	NaN	NaN	NaN
0.226	-39.8493	88.026	138.3972	-0.053223	-0.021777	-0.062207	61.318	141.104	570.3355	-0.58447	0.44189	-0.12891	-230.1	-248.272	1309.326	-1.4155	0.87842	-0.54102	NaN	NaN	NaN	NaN	NaN	NaN
0.228	-62.8772	80.698	126.1475	-0.043554	-0.03418	-0.06123	59.822	193.585	528.4142	-0.53272	0.40821	-0.12793	-175.376	-281.8102	1348.067	-1.3086	0.81152	-0.54883	NaN	NaN	NaN	NaN	NaN	NaN
0.23	-64.6043	67.966	119.6868993	-0.035645	-0.038574	-0.055176	39.835	224.07	487.0454	-0.48096	0.37695	-0.13037	-122.9248	-331.151	1399.22	-1.1558	0.72119	-0.57568	NaN	NaN	NaN	NaN	NaN	NaN
0.232	-50.288	62.0757	96.4374	-0.023144	-0.045801	-0.053027	80.081	164.136	485.4844	-0.4165	0.33154	-0.13135	-106.3563	-358.411	1478.1972	-1.0391	0.66797	-0.58886	NaN	NaN	NaN	NaN	NaN	NaN
0.234	-51.7135	54.5242	105.8473	-0.01914	-0.053418	-0.045605	45.4265	209.4	439.014	-0.37842	0.30908	-0.12744	-43.613	-396.218	1509.6768	-0.89355	0.59961	-0.58594	NaN	NaN	NaN	NaN	NaN	NaN
0.236	-55.582	43.915	106.0023	-0.017188	-0.061621	-0.046387	42.673	182.562	371.035	-0.31543	0.25781	-0.13135	-62.204	-383.809	1536.055	-0.68652	0.50879	-0.5625	NaN	NaN	NaN	NaN	NaN	NaN
0.238	-51.1725	48.579	87.8062	-0.008789	-0.064551	-0.03877	40.2395	154.14688	335.455	-0.26635	0.22559	-0.1333	-40.426	-357.152	1533.457	-0.59863	0.47217	-0.55322	NaN	NaN	NaN	NaN	NaN	NaN
0.24	-36.994	52.514	84.9295	-0.003418	-0.070313	-0.035156	40.5459	203.43911	293.142	-0.22266	0.19141	-0.13184	-15.409	-293.755	1577.912	-0.4873	0.40576	-0.55127	NaN	NaN	NaN	NaN	NaN	NaN
0.242	-57.231	54.1256	78.0062	-0.0055664	-0.071191	-0.029883	34.5764	114.675	295.3712	-0.1626	0.14355	-0.14063	37.527	-250.119	1604.065	-0.47241	0.37281	-0.55078	NaN	NaN	NaN	NaN	NaN	NaN
0.244	-39.348	50.6577	87.4036	-0.0061524	-0.076367	-0.025879	25.9103	144.5845	288.45	-0.13818	0.12451	-0.14209	30.263	-198.551	1659.429	-0.49756	0.36328	-0.54053	NaN	NaN	NaN	NaN	NaN	NaN
0.246	-43.649	52.5654	86.2712	-0.0049805	-0.079883	-0.021192	-9.4496	167.147	228.288	-0.089844	0.077148	-0.14502	42.608	-168.461	1651.452	-0.625	0.3877	-0.51758	NaN	NaN	NaN	NaN	NaN	NaN
0.248	-46.08	51.338	54.7042	-0.010156	-0.079883	-0.024512	7.5553	109.63	228.5847	-0.060547	0.055175	-0.15015	18.001	-139.997	1686.948	-0.71875	0.42383	-0.51367	NaN	NaN	NaN	NaN	NaN	NaN
0.25	-41.136	49.436	60.4805	-0.014648	-0.081543	-0.019043	-24.008	168.685	207.279	-0.035156	0.027832	-0.15186	63.703	-123.788	1708.2879	-0.94482	0.52002	-0.51221	NaN	NaN	NaN	NaN	NaN	NaN
0.252	-25.472	50.498	67.7752	-0.020606	-0.084375	-0.014355	-72.061	117.9191	189.8244	-0.0058594	0.0024414	-0.15088	54.678	-101.164	1743.694	-1.1167	0.61377	-0.52246	NaN	NaN	NaN	NaN	NaN	NaN
0.254	-9.78	43.3674	67.19164	-0.03086	-0.080273	-0.010449	-40.4828	94.9346	181.2773	0.00048828	-0.013672	-0.1543	67.647	-91.31	1726.7939	-1.2773	0.71484	-0.53711	NaN	NaN	NaN	NaN	NaN	NaN
0.256	-7.069	47.2696	60.3578	-0.035937	-0.077539	-0.0038086	-55.657	140.118	135.412	0.018066	-0.034668	-0.15332	32.1	-94.804	1725.639	-1.4844	0.84766	-0.57813	NaN	NaN	NaN	NaN	NaN	NaN
0.258	1.08499999999999	33.1479	50.8132	-0.044629	-0.074316	-0.0023438	-47.215	47.615	128.5292	0.024902	-0.05957	-0.1543	33.494	-108.153	1740.36	-1.5698	0.92432	-0.60693	NaN	NaN	NaN	NaN	NaN	NaN
0.26	-6.04	26.1762	41.8402	-0.053711	-0.068848	0.0029297	-33.966	75.65372	137.5757	0.02832	-0.066895	-0.15186	-4.441	-127.248	1816.7371	-1.7456	1.0884	-0.66748	NaN	NaN	NaN	NaN	NaN	NaN
0.262	8.568	23.6862	32.4415	-0.059863	-0.065527	0.0064453	-57.2277	115.95	113.184	0.029297	-0.083984	-0.15088	-13.897	-121.279	1840.151	-1.8943	1.2327	-0.71558	NaN	NaN	NaN	NaN	NaN	NaN
0.264	-1.381	33.2698	28.7167	-0.064356	-0.063574	0.0093751	-8.741	81.8082	95.841	0.026856	-0.089112	-0.15088	-31.502	-122.946	1860.39	-2.0703	1.3936	-0.7207	NaN	NaN	NaN	NaN	NaN	NaN
0.266	-4.608	28.9903	28.688683	-0.071777	-0.062402	0.0093751	-26.7581	153.484	75.25	0.026855	-0.095703	-0.16016	-33.353	-113.999	1861.601	-2.4116	1.6001	-0.7417	NaN	NaN	NaN	NaN	NaN	NaN
0.268	2.415	31.2578	32.2087	-0.071973	-0.05625	0.014648	-33.6897	82.9432	72.57982	0.021973	-0.10547	-0.16113	-84.761	-138.977	1901.93	-2.5762	1.707	-0.74219	NaN	NaN	NaN	NaN	NaN	NaN
0.27	-26.61	27.7964	25.138	-0.070801	-0.047852	0.018555	-9.725	38.421	87.0327	0.018066	-0.10156	-0.14795	-79.827	-103.96	1908.604	-2.9043	1.9043	-0.75195	NaN	NaN	NaN	NaN	NaN	NaN
0.272	-29.644	31.0553	37.076	-0.072461	-0.051172	0.015527	-15.994	92.285	55.031	0.0087891	-0.10449	-0.15137	-100.275	-107.3919	1917.175	-3.1043	2.0402	-0.75171	NaN	NaN	NaN	NaN	NaN	NaN
0.274	-32.358	21.1029	42.98325	-0.072168	-0.043554	0.012109	-12.09	21.7834	52.4158	0.011963	-0.10693	-0.14746	-59.919	-55.661	1862.558	-3.2476	2.145	-0.74756	NaN	NaN	NaN	NaN	NaN	NaN
0.276	-35.001	32.385	55.1129	-0.066308	-0.044336	0.0066406	6.178	46.13	51.56181	0.0048828	-0.1084	-0.14307	-85.012	-58.675	1837.0478	-3.2925	2.2153	-0.73975	NaN	NaN	NaN	NaN	NaN	NaN
0.278	-31.916	40.4567	22.0744	-0.065723	-0.040332	-0.00019531	-17.271	48.269	47.0233	-0.0039063	-0.10156	-0.1416	-84.142	-16.418	1799.023	-3.2612	2.2114	-0.7417	NaN	NaN	NaN	NaN	NaN	NaN
0.28	-57.4297	34.6413	29.59407	-0.059082	-0.041504	-0.0058594	-11.103	-12.9877	51.88	-0.010254	-0.09668	-0.13867	-89.878	-1.884	1788.053	-3.0957	2.1563	-0.76172	NaN	NaN	NaN	NaN	NaN	NaN
0.282	-50.416	23.24359	25.3475	-0.057617	-0.038477	-0.011231	3.607	72.074	33.8159	-0.020508	-0.083008	-0.13379	-48.2605	48.273	1764.101	-2.9392	2.111	-0.77661	NaN	NaN	NaN	NaN	NaN	NaN
0.284	-55.6977	24.9114	31.2574	-0.052637	-0.041406	-0.015527	29.1723	25.123	44.594	-0.03125	-0.070801	-0.13184	-39.26432	16.5389	1771.6867	-2.8086	2.0938	-0.80078	NaN	NaN	NaN	NaN	NaN	NaN
0.286	-53.6069	23.7865	10.445	-0.04795	-0.038281	-0.02334	23.701	-8.7557	81.914	-0.040527	-0.058594	-0.13135	-33.9753	34.2997	1761.6789	-2.728	2.1626	-0.78662	NaN	NaN	NaN	NaN	NaN	NaN
0.288	-72.1945	27.3229	29.8393	-0.045606	-0.037012	-0.031055	8.452	48.7439	56.808	-0.053711	-0.044922	-0.12744	-51.52438	12.002	1761.5067	-2.7031	2.2188	-0.7666	NaN	NaN	NaN	NaN	NaN	NaN
0.29	-49.252	21.9537	45.8151	-0.038574	-0.035645	-0.03418	15.164	-28.2218	19.7533	-0.056152	-0.039063	-0.11914	-29.112	67.6564	1712.692	-2.6147	2.2114	-0.68506	NaN	NaN	NaN	NaN	NaN	NaN
0.292	-56.15831	16.5059	29.2995	-0.035644	-0.035937	-0.037402	19.393	8.762	14.569	-0.070313	-0.016113	-0.10938	-9.076	61.413	1701.645	-2.4907	2.0942	-0.66015	NaN	NaN	NaN	NaN	NaN	NaN
0.294	-59.3884	28.9992	20.3631	-0.033887	-0.028711	-0.041992	-23.606	19.1314	7.632	-0.073486	-0.011963	-0.1023	28.923	108.1577	1696.789	-2.3418	1.9238	-0.6582	NaN	NaN	NaN	NaN	NaN	NaN
0.296	-59.5511	31.0831	32.5902	-0.032715	-0.026758	-0.04707	-13.677	-37.985	34.5888	-0.068848	-0.0043945	-0.089355	16.898	67.9586	1716.4731	-2.1362	1.7192	-0.68311	NaN	NaN	NaN	NaN	NaN	NaN
0.298	-52.1545	24.2787	55.4239	-0.027539	-0.024805	-0.053516	-39.082	52.704	30.4249	-0.064453	0.0058594	-0.078613	23.759	109.2623	1694.0343	-2.0376	1.6294	-0.68799	NaN	NaN	NaN	NaN	NaN	NaN
0.3	-51.726	5.543	68.0096	-0.021973	-0.018066	-0.058594	-48.1052	26.493	16.5381	-0.061035	0.015137	-0.073242	33.3099	64.01	1676.1614	-1.8828	1.4824	-0.69141	NaN	NaN	NaN	NaN	NaN	NaN
0.302	-38.425	-5.4254	64.5601	-0.017676	-0.015723	-0.064551	-50.7091	14.9066	32.1808	-0.056152	0.020508	-0.05957	54.7636	105.08	1662.838	-1.8076	1.4082	-0.67773	NaN	NaN	NaN	NaN	NaN	NaN
0.304	-22.609	-9.0782	95.0047	-0.0072266	-0.010352	-0.070801	-57.2229	48.489	40.7783	-0.054932	0.029053	-0.046387	55.944	79.118	1645.644	-1.7539	1.3486	-0.64844	NaN	NaN	NaN	NaN	NaN	NaN
0.306	-12.15	-6.737	128.46252	-0.0013672	-0.010742	-0.075098	-54.362	-17.846	21.1198	-0.049316	0.034668	-0.03418	20.418	165.54487	1579.662	-1.7319	1.311	-0.61768	NaN	NaN	NaN	NaN	NaN	NaN
0.308	-6.059	2.1199	147.537	0.0082032	-0.0097656	-0.081934	-60.943	19.1326	17.429	-0.046875	0.030762	-0.018555	7.428	155.37433	1530.782	-1.728	1.3052	-0.60498	NaN	NaN	NaN	NaN	NaN	NaN
0.31	-0.638999999999999	17.4729	180.906	0.019043	-0.010742	-0.087891	-70.954	37.5362	-11.612	-0.041016	0.023926	-0.012207	-17.649	234.111	1490.207	-1.7183	1.3149	-0.59229	NaN	NaN	NaN	NaN	NaN	NaN
0.312	37.087	-4.9548	232.054	0.025879	-0.0097655	-0.098535	-57.04828	-31.7965	21.5605	-0.024414	0.01416	-0.0058594	-44.289	193.003	1473.6451	-1.6958	1.3208	-0.58154	NaN	NaN	NaN	NaN	NaN	NaN
0.314	71.093	-3.1949	305.87	0.033984	-0.011816	-0.10889	-51.672	30.2053	32.207	-0.012939	-0.0004883	0.0051269	-67.451	281.505	1440.0853	-1.6572	1.3262	-0.57178	NaN	NaN	NaN	NaN	NaN	NaN
0.316	74.683	7.4158	403.3704	0.03711	-0.011816	-0.11631	-66.299	13.626	9.839	0.0019531	-0.010254	0.0083008	-66.604	262.868	1407.4424	-1.5776	1.311	-0.55029	NaN	NaN	NaN	NaN	NaN	NaN
0.318	56.023	9.60623	470.7082	0.032617	-0.01543	-0.12852	-43.432	7.57	13.8567	0.024902	-0.037598	0.013672	-97.005	328.561	1370.526	-1.5391	1.291	-0.54688	NaN	NaN	NaN	NaN	NaN	NaN
0.32	22.5706	9.547	543.67978	0.020508	-0.013672	-0.13525	-48.92241	76.992	9.6384	0.041016	-0.04541	0.020508	-137.1157	262.846	1334.513	-1.4453	1.2422	-0.51563	NaN	NaN	NaN	NaN	NaN	NaN
0.322	37.658	8.854	605.99404	0.0049806	-0.0044922	-0.15381	-48.1239	-3.1915	25.6601	0.063965	-0.063965	0.022949	-156.4973	286.348	1318.042	-1.3818	1.1938	-0.48633	NaN	NaN	NaN	NaN	NaN	NaN
0.324	-11.653	2.255	655.34566	-0.018262	0.0035157	-0.15976	-34.04	27.898	40.3779	0.080566	-0.076905	0.022217	-156.0129	231.9598	1266.129	-1.3223	1.1387	-0.45947	NaN	NaN	NaN	NaN	NaN	NaN
0.326	-30.506	-12.657	731.475	-0.053418	0.011328	-0.16875	-29.968	40.099	6.779	0.09375	-0.089355	0.020508	-137.1196	278.7567	1210.0924	-1.2456	1.0747	-0.42529	NaN	NaN	NaN	NaN	NaN	NaN
0.328	-59.448	-9.275	801.011	-0.10537	0.020118	-0.17334	-19.784	-22.8185	9.9602	0.10938	-0.10254	0.018555	-151.024	227.8951	1151.148	-1.2065	1.0415	-0.40918	NaN	NaN	NaN	NaN	NaN	NaN
0.33	-120.288	32.3526	845.0726	-0.16748	0.036133	-0.1748	-6.45800000000001	49.37	12.531	0.11328	-0.10645	0.015625	-201.636	268.545	1125.207	-1.1348	0.98535	-0.37695	NaN	NaN	NaN	NaN	NaN	NaN
0.332	-113.547	24.1476	867.0622	-0.24795	0.049804	-0.18721	-1.965	27.7927	10.438	0.12451	-0.11084	0.015137	-200.31	222.8552	1087.252	-1.0786	0.9458	-0.34765	NaN	NaN	NaN	NaN	NaN	NaN
0.334	-155.1992	-3.302	902.9614	-0.346	0.071094	-0.19561	0.112000000000002	40.892	6.5184	0.12476	-0.11402	0.0058593	-180.9936	273.7135	1053.8007	-1.0234	0.90625	-0.31885	NaN	NaN	NaN	NaN	NaN	NaN
0.336	-132.085	-16.0544	934.868	-0.45615	0.10235	-0.19951	15.957	103.116	1.6502	0.12646	-0.11084	0.0043945	-176.814	233.163	983.584	-0.94531	0.86328	-0.27734	NaN	NaN	NaN	NaN	NaN	NaN
0.338	-97.216	-24.7757	964.912	-0.59014	0.14317	-0.19248	19.061	27.82	18.28811	0.12891	-0.104	-0.0019531	-191.027	252.153	961.599	-0.90625	0.8291	-0.25391	NaN	NaN	NaN	NaN	NaN	NaN
0.34	-93.859	-13.5542	997.263	-0.75293	0.19922	-0.18164	16.911	33.449	54.966	0.13086	-0.10303	-0.0078125	-148.29035	205.807	927.588	-0.80078	0.74805	-0.22656	NaN	NaN	NaN	NaN	NaN	NaN
0.342	-160.458	15.4028	1004.41	-0.93662	0.26338	-0.17315	14.547	39.4405	39.7764	0.12842	-0.10693	-0.0087891	-136.6425	268.4072	870.6541	-0.71582	0.67823	-0.19825	NaN	NaN	NaN	NaN	NaN	NaN
0.344	-158.178	34.2709	1002.286	-1.1394	0.34092	-0.17129	-9.264	-11.597	27.8282	0.13331	-0.11133	-0.010254	-96.86	268.8563	795.413	-0.6377	0.60352	-0.17236	NaN	NaN	NaN	NaN	NaN	NaN
0.346	-145.2973	11.4906	971.753	-1.3468	0.43506	-0.16777	-3.797	49.712	31.212	0.12842	-0.11768	-0.01709	-64.313	300.213	737.3295	-0.5332	0.50195	-0.14795	NaN	NaN	NaN	NaN	NaN	NaN
0.348	-160.7454	-19.379	953	-1.5612	0.54385	-0.1623	-7.735	25.6385	21.2129	0.12598	-0.12158	-0.018555	-50.094	236.2433	692.6248	-0.48633	0.45215	-0.13721	NaN	NaN	NaN	NaN	NaN	NaN
0.35	-154.4859	-48.919	976.9728	-1.7734	0.66602	-0.15039	-37.729	4.26413	41.0103	0.12646	-0.12842	-0.023926	-68.91	236.203	644.42	-0.40234	0.3584	-0.1167	NaN	NaN	NaN	NaN	NaN	NaN
0.352	-164.077	-66.178	1011.6847	-1.9696	0.80371	-0.13965	-43.423	75.497	17.4491	0.11963	-0.12598	-0.030273	-28.603	214.96505	576.879	-0.34131	0.29175	-0.099365	NaN	NaN	NaN	NaN	NaN	NaN
0.354	-154.172	-66.4844	1005.1123	-2.1491	0.95909	-0.12959	-36.4826	7.1458	17.8549	0.11474	-0.12305	-0.038086	-17.173	215.964	547.722	-0.28613	0.23486	-0.080566	NaN	NaN	NaN	NaN	NaN	NaN
0.356	-146.494	-52.9956	984.4231	-2.2976	1.1372	-0.12646	-42.462	30.0254	64.625	0.11182	-0.11816	-0.040527	-8.343	186.456	519.28	-0.22168	0.16357	-0.063477	NaN	NaN	NaN	NaN	NaN	NaN
0.358	-118.718	-63.322	965.507	-2.3937	1.3315	-0.1292	-55.1179	39.1342	55.4441	0.10742	-0.11133	-0.045898	-24.389	173.1833	490.222	-0.18506	0.13623	-0.053223	NaN	NaN	NaN	NaN	NaN	NaN
0.36	-74.39743	-86.934	976.4638	-2.4336	1.5137	-0.13086	-51.527	-22.123	47.1797	0.10352	-0.10547	-0.047852	-15.577	169.079	398.9688	-0.125	0.086914	-0.035156	NaN	NaN	NaN	NaN	NaN	NaN
0.362	-44.675	-93.9279	985.705	-2.3945	1.634	-0.15615	-45.903	45.2439	35.8825	0.10107	-0.098145	-0.059082	-28.091	186.725	345.462	-0.067383	0.044922	-0.0068359	NaN	NaN	NaN	NaN	NaN	NaN
0.364	-28.182	-101.8752	1015.452	-2.2844	1.6563	-0.20488	-72.6868	24.0344	17.0762	0.097168	-0.093017	-0.063965	-3.46	190.4043	329.2861	-0.040527	0.019531	0.0029297	NaN	NaN	NaN	NaN	NaN	NaN
0.366	-13.208	-108.3911	1044.3979	-2.1027	1.602	-0.25527	-68.3504	11.2841	40.5804	0.092773	-0.083496	-0.06543	-15.216	177.0055	328.3559	-0.003418	-0.0019531	0.013184	NaN	NaN	NaN	NaN	NaN	NaN
0.368	24.934	-107.6603	1066.006	-1.8709	1.4951	-0.29824	-66.5238	62.359	40.17199	0.096191	-0.070313	-0.084961	-21.048	194.7871	279.6756	0.016358	-0.020264	0.031494	NaN	NaN	NaN	NaN	NaN	NaN
0.37	39.8231	-108.726	1059.9753	-1.6318	1.3467	-0.32861	-73.3076	-1.5976	22.6422	0.094238	-0.071777	-0.083008	-11.713	183.8529	226.086	0.033203	-0.035645	0.035645	NaN	NaN	NaN	NaN	NaN	NaN
0.372	43.5063	-118.481	1051.6911	-1.426	1.1982	-0.34609	-36.227	19.0679	38.1816	0.091797	-0.064453	-0.091309	-49.632	185.441	185.774	0.044434	-0.055176	0.051758	NaN	NaN	NaN	NaN	NaN	NaN
0.374	39.758	-119.6935	1059.933	-1.2551	1.0607	-0.34541	-54.7853	21.10226	36.3552	0.093018	-0.056885	-0.095947	-80.011	143.40808	172.15528	0.04541	-0.062012	0.057129	NaN	NaN	NaN	NaN	NaN	NaN
0.376	40.287	-104.984	1083.4734	-1.1317	0.94815	-0.34033	-55.834	-40.031	51.7243	0.089844	-0.05127	-0.10059	-97.5075	161.402	158.152	0.03125	-0.073242	0.070313	NaN	NaN	NaN	NaN	NaN	NaN
0.378	57.5248	-108.628	1115.3031	-1.05	0.86348	-0.36172	-19.582	19.941	42.2781	0.087402	-0.04248	-0.10449	-111.4633	150.181	116.9949	0.010742	-0.073486	0.080567	NaN	NaN	NaN	NaN	NaN	NaN
0.38	31.7646	-113.731	1160.002	-0.98242	0.79102	-0.38965	-25.932	-6.2263	27.5215	0.083496	-0.032715	-0.10596	-99.1772	176.008	70.996	-0.019531	-0.075684	0.088867	NaN	NaN	NaN	NaN	NaN	NaN
0.382	38.4233	-135.166	1194.457	-0.90019	0.72461	-0.41201	-29.339	-44.1875	71.523	0.071289	-0.023926	-0.10742	-122.391	115.889	69.435	-0.072266	-0.069336	0.10254	NaN	NaN	NaN	NaN	NaN	NaN
0.384	42.0806	-140.9135	1194.081	-0.80938	0.66289	-0.42265	-12.935	10.468	94.616	0.06543	-0.0097657	-0.11304	-131.0519	124.699	58.646	-0.094238	-0.066406	0.10254	NaN	NaN	NaN	NaN	NaN	NaN
0.386	48.8124	-130.8919	1196.74	-0.71602	0.60312	-0.42929	7.901	-25.10505	116.003	0.053223	0.0043945	-0.12061	-119.7954	74.4385	62.654	-0.15137	-0.048828	0.11523	NaN	NaN	NaN	NaN	NaN	NaN
0.388	15.9568	-113.787	1209.5252	-0.63643	0.54951	-0.42685	15.025	35.494	207.022	0.032227	0.027832	-0.13281	-93.699	111.6	38.78	-0.18774	-0.033691	0.12158	NaN	NaN	NaN	NaN	NaN	NaN
0.39	15.5463	-96.4213	1238.1319	-0.58301	0.50195	-0.41797	9.236	74.21	288.015	0.020508	0.040527	-0.1416	-84.833	49.6683	49.27931	-0.22656	-0.016113	0.12402	NaN	NaN	NaN	NaN	NaN	NaN
0.392	5.559	-97.1875	1257.0711	-0.55039	0.4625	-0.39941	-33.0311	18.5966	407.596	-0.014648	0.067383	-0.13428	-81.6278	68.422	61.673	-0.25342	0.0068359	0.13428	NaN	NaN	NaN	NaN	NaN	NaN
0.394	-26.1825	-110.304	1285.231	-0.54063	0.44649	-0.37431	52.359	60.3196	496.094	-0.061279	0.086426	-0.14429	-72.3501	14.5217	77.245	-0.26514	0.012695	0.14795	NaN	NaN	NaN	NaN	NaN	NaN
0.396	-22.4082	-119.454	1313.117	-0.55391	0.43867	-0.35713	65.635	31.0358	574.273	-0.12061	0.11719	-0.14795	-47.323	66.3422	50.304	-0.29883	0.02832	0.14941	NaN	NaN	NaN	NaN	NaN	NaN
0.398	-30.86713	-109.0997	1324.827	-0.57676	0.43955	-0.33105	43.01	32.579	727.3757	-0.22754	0.16602	-0.1582	-27.017	21.229	56.1232	-0.32642	0.039307	0.1499	NaN	NaN	NaN	NaN	NaN	NaN
0.4	-39.602	-94.09535	1318.7327	-0.6123	0.44824	-0.31055	48.123	94.772	864.69015	-0.32861	0.20386	-0.16113	-27.677	45.9149	59.628	-0.35254	0.050293	0.14844	NaN	NaN	NaN	NaN	NaN	NaN
0.402	-67.097	-68.4333	1297.566	-0.63711	0.46504	-0.28955	8.578	46.6326	952.627	-0.44873	0.24365	-0.15918	-19.602	-38.873	75.461	-0.39307	0.067383	0.15039	NaN	NaN	NaN	NaN	NaN	NaN
0.404	-77.889	-75.201	1323.6241	-0.66719	0.48418	-0.27939	-2.989	66.377	1034.296	-0.64209	0.30762	-0.16309	10.487	14.2884	53.6964	-0.40967	0.07666	0.15186	NaN	NaN	NaN	NaN	NaN	NaN
0.406	-64.461	-83.3117	1324.5813	-0.69805	0.48848	-0.27588	-52.805	39.732	1094.885	-0.76318	0.35449	-0.16699	40.698	-30.835	54.981	-0.44873	0.10303	0.15137	NaN	NaN	NaN	NaN	NaN	NaN
0.408	-28.7518	-90.90537	1324.1719	-0.73291	0.49385	-0.27822	-82.635	-65.002	1198.727	-1.0234	0.45898	-0.16602	17.887	25.3723	52.383	-0.4773	0.12891	0.15869	NaN	NaN	NaN	NaN	NaN	NaN
0.41	-14.5859	-84.7465	1326.979	-0.77734	0.5	-0.27246	-114.614	-25.1104	1261.966	-1.2441	0.56055	-0.1543	32.97	-37.973	68.859	-0.50928	0.15625	0.16211	NaN	NaN	NaN	NaN	NaN	NaN
0.412	-30.511	-66.198	1337.8482	-0.84472	0.50429	-0.26993	-167.788	-31.6777	1232.358	-1.4824	0.66211	-0.13867	16.5	21.9635	44.798	-0.54004	0.18994	0.17236	NaN	NaN	NaN	NaN	NaN	NaN
0.414	-0.7618	-58.407	1356.0861	-0.93035	0.53349	-0.25762	-166.433	-58.962	1234.912	-1.8281	0.82031	-0.10645	37.015	-4.273	20.8084	-0.5625	0.20752	0.1748	NaN	NaN	NaN	NaN	NaN	NaN
0.416	7.743	-57.175	1334.814	-1.0327	0.57645	-0.24864	-187.1546	-41.8983	1209.952	-2.0112	0.91357	-0.085938	28.704	69.961	14.46	-0.57764	0.22949	0.18408	NaN	NaN	NaN	NaN	NaN	NaN
0.418	18.0242	-45.1432	1345.60792	-1.1563	0.637	-0.23994	-188.299	-103.582	1192.99	-2.3452	1.1177	-0.051758	35.959	13.2835	44.2926	-0.58374	0.25342	0.19482	NaN	NaN	NaN	NaN	NaN	NaN
0.42	57.634	-42.9307	1368.1986	-1.2847	0.70752	-0.25977	-134.621	-102.024	1202.673	-2.5664	1.3106	-0.014648	11.409	43.4505	34.168	-0.57715	0.26709	0.20068	NaN	NaN	NaN	NaN	NaN	NaN
0.422	74.897	-35.984	1382.9383	-1.4172	0.79975	-0.28341	-147.1242	-88.61	1176.621	-2.7593	1.5229	0.014648	0.0359999999999943	-8.6976	11.4248	-0.55371	0.26953	0.21387	NaN	NaN	NaN	NaN	NaN	NaN
0.424	69.249	-28.192	1368.885	-1.5508	0.89197	-0.31919	-170.547	-113.109	1188.057256	-2.9453	1.8066	0.01123	-42.596	28.2481	-17.1775	-0.53955	0.26611	0.21826	NaN	NaN	NaN	NaN	NaN	NaN
0.426	44.859	-17.129	1382.98035	-1.6731	0.98301	-0.36097	-189.611	-58.096	1194.991	-2.9702	1.9087	-0.016602	-47.2211	-9.89784	17.5844	-0.49219	0.25	0.22705	NaN	NaN	NaN	NaN	NaN	NaN
0.428	77.128	-31.309	1389.0711	-1.7904	1.0781	-0.39328	-202.082	-51.709	1156.699	-2.8647	2.0005	-0.12061	-66.054	29.1379	40.9947	-0.43995	0.22925	0.2334	NaN	NaN	NaN	NaN	NaN	NaN
0.43	91.857	-31.455	1375.089	-1.9092	1.1719	-0.41406	-190.574	-52.705	1129.906	-2.6426	1.9615	-0.21875	-58.9147	-2.733	9.5247	-0.38281	0.20068	0.24561	NaN	NaN	NaN	NaN	NaN	NaN
0.432	99.406	-23.18477	1365.90934	-2.0375	1.2665	-0.42382	-193.2399	-26.562	1118.45	-2.3418	1.8691	-0.30762	-89.4555	39.608	-15.555	-0.30225	0.14795	0.23828	NaN	NaN	NaN	NaN	NaN	NaN
0.434	78.508	-18.03191	1373.78852	-2.1516	1.3501	-0.43483	-212.374	-117.158	1116.512	-1.9077	1.6646	-0.39307	-81.009	11.195	-13.8983	-0.26074	0.11816	0.23828	NaN	NaN	NaN	NaN	NaN	NaN
0.436	85.584	-17.236	1383.0012	-2.2512	1.4332	-0.44846	-177.139	-161.7452	1176.6301	-1.7207	1.5469	-0.43359	-119.698	29.231	3.941	-0.15674	0.059082	0.23438	NaN	NaN	NaN	NaN	NaN	NaN
0.438	71.367	1.2605	1373.1206	-2.3202	1.517	-0.45816	-146.652	-151.1483	1186.8469	-1.4312	1.3188	-0.48486	-96.676	16.3794	10.934	-0.079835	0.010986	0.22924	NaN	NaN	NaN	NaN	NaN	NaN
0.44	58.995	13.0654	1384.8749	-2.3613	1.5801	-0.46729	-86.0346	-222.345	1187.2816	-1.2681	1.1582	-0.50391	-102.5497	52.4501	19.284	0.00097656	-0.03125	0.22559	NaN	NaN	NaN	NaN	NaN	NaN
0.442	55.147	12.2789	1403.476	-2.3579	1.6222	-0.48054	-60.457	-226.888	1225.804	-1.1309	1.0117	-0.53418	-76.4383	56.676	8.9	0.10156	-0.098633	0.21045	NaN	NaN	NaN	NaN	NaN	NaN
0.444	43.886	15.66566	1398.3938	-2.3171	1.6411	-0.48702	-58.542	-240.399	1240.6583	-0.95703	0.85449	-0.57031	-82.7969	67.319	43.677081	0.15967	-0.13428	0.20557	NaN	NaN	NaN	NaN	NaN	NaN
0.446	14.9318	27.9993	1382.087	-2.2419	1.6359	-0.49081	-40.211	-272.488	1284.7174	-0.8623	0.78027	-0.5791	-91.1189	53.049	56.18	0.26807	-0.2085	0.1958	NaN	NaN	NaN	NaN	NaN	NaN
0.448	-19.974	42.865	1372.1057	-2.1441	1.6108	-0.50261	-4.642	-197.9751	1324.8342	-0.66895	0.65234	-0.58984	-82.1503	77.26	36.235	0.34717	-0.25904	0.1897	NaN	NaN	NaN	NaN	NaN	NaN
0.45	-21.203777	48.683	1380.842	-2.0332	1.5527	-0.50781	-9.144	-219.363	1353.3571	-0.54345	0.56885	-0.5957	-51.7817	79.501	24.28	0.41846	-0.31494	0.18018	NaN	NaN	NaN	NaN	NaN	NaN
0.452	-34.575	48.668	1363.102	-1.924	1.4708	-0.51147	-7.58600000000001	-222.413	1428.86	-0.43652	0.49268	-0.58447	-29.382	68.454	39.2268	0.50098	-0.375	0.16895	NaN	NaN	NaN	NaN	NaN	NaN
0.454	-38.509	54.4117	1337.0343	-1.8155	1.3755	-0.5002	2.112	-197.2531	1421.1761	-0.33252	0.40137	-0.56885	-25.65	46.503	57.3074	0.5293	-0.40283	0.16211	NaN	NaN	NaN	NaN	NaN	NaN
0.456	-42.794	55.832	1330.00733	-1.716	1.2825	-0.48754	-12.413	-236.191	1403.0466	-0.30225	0.37549	-0.55225	-23.983	14.8867	59.87379	0.57715	-0.45117	0.15332	NaN	NaN	NaN	NaN	NaN	NaN
0.458	-54.27	59.933	1322.6866	-1.6479	1.2022	-0.48164	-7.83	-168.7316	1421.47	-0.28906	0.33057	-0.51807	4.229	26.794	45.4621	0.60572	-0.47046	0.15161	NaN	NaN	NaN	NaN	NaN	NaN
0.46	-45.5775	60.748	1322.917	-1.5874	1.1392	-0.47266	-1.85	-147.5	1424.322	-0.32129	0.30249	-0.50049	14.687	5.32	58.228	0.61084	-0.48486	0.14746	NaN	NaN	NaN	NaN	NaN	NaN
0.462	-39.8878	83.922	1287.4452	-1.5423	1.0762	-0.46143	7.265	-180.827	1475.336	-0.38379	0.29004	-0.48633	21.997	11.4101	66.838	0.60791	-0.48535	0.14258	NaN	NaN	NaN	NaN	NaN	NaN
0.464	-57.477	81.922	1290.6128	-1.5114	1.0295	-0.44305	-21.218	-131.041	1492.6064	-0.51904	0.30469	-0.45752	36.477	-4.423	77.542	0.60107	-0.479	0.14551	NaN	NaN	NaN	NaN	NaN	NaN
0.466	-21.9167	79.2021	1268.0784	-1.4879	0.99823	-0.429	-19.187	-164.783	1475.704	-0.60693	0.33447	-0.43701	34.794	33.061	52.353	0.56641	-0.45313	0.15332	NaN	NaN	NaN	NaN	NaN	NaN
0.468	-20.3485	78.8268	1266.98126	-1.4727	0.97965	-0.41961	5.227	-175.5704	1523.759	-0.82617	0.44434	-0.38867	31.051	15.2882	54.8161	0.53027	-0.4292	0.1521	NaN	NaN	NaN	NaN	NaN	NaN
0.47	-20.8361	97.383	1251.9385	-1.4531	0.9668	-0.40527	-36.677	-145.9399	1530.584	-1.0203	0.5481	-0.36304	19.654	24.42261	57.144	0.48633	-0.39844	0.1543	NaN	NaN	NaN	NaN	NaN	NaN
0.472	-25.2827	105.985	1239.5345	-1.4272	0.96499	-0.4041	-76.63539	-204.27	1549.422	-1.2227	0.65234	-0.34961	6.608	-31.4982	61.831	0.42725	-0.35498	0.1543	NaN	NaN	NaN	NaN	NaN	NaN
0.474	12.222	106.849	1230.5738	-1.4127	0.95981	-0.39088	-74.839	-162.259	1581.357	-1.4805	0.82227	-0.34814	-17.203	6.032	34.3641	0.40039	-0.33252	0.15869	NaN	NaN	NaN	NaN	NaN	NaN
0.476	6.873	96.3526	1196.5929	-1.3921	0.95193	-0.38162	-94.534	-140.672	1575.2921	-1.6069	0.90479	-0.37256	-1.26	-11.2514	38.104	0.35205	-0.28955	0.17041	NaN	NaN	NaN	NaN	NaN	NaN
0.478	7.903	89.239741	1182.68636	-1.3785	0.9452	-0.36886	-84.1208	-169.207	1602.00782	-1.8413	1.1118	-0.43066	-15.357	27.326	6.474	0.31836	-0.26953	0.1709	NaN	NaN	NaN	NaN	NaN	NaN
0.48	20.289	93.9844	1162.9159	-1.3711	0.93945	-0.35547	-83.244	-111.6482	1635.0094	-2.0259	1.2769	-0.45948	-31.893	-5.91254	27.8786	0.2915	-0.24463	0.16699	NaN	NaN	NaN	NaN	NaN	NaN
0.482	32.115	97.45167	1143.5724	-1.3716	0.93039	-0.34641	-85.228	-115.1194	1631.618	-2.2227	1.4395	-0.48145	-51.271	31.366	15.6537	0.2583	-0.21875	0.16846	NaN	NaN	NaN	NaN	NaN	NaN
0.484	43.8883	110.2518	1115.1709	-1.3737	0.92406	-0.33405	-55.1463	-85.4308	1653.515	-2.4863	1.6563	-0.48486	-53.324	-12	-9.55962	0.24219	-0.20557	0.1665	NaN	NaN	NaN	NaN	NaN	NaN
0.486	47.0893	111.9179	1110.5421	-1.3739	0.90916	-0.3252	-54.3114	-25.52	1624.507	-2.623	1.7578	-0.47412	-93.578	39.62	-24.8933	0.2207	-0.19336	0.1626	NaN	NaN	NaN	NaN	NaN	NaN
0.488	35.005	102.0723	1110.0629	-1.3674	0.89286	-0.31287	-77.197	-90.39	1640.066	-2.875	1.9453	-0.4668	-76.779	-3.994	-8.893	0.20264	-0.19238	0.15747	NaN	NaN	NaN	NaN	NaN	NaN
0.49	27.277	103.4866	1082.6741	-1.3569	0.87744	-0.3042	-40.131	-63.345	1664.0946	-3.0125	2.0452	-0.47095	-84.9797	37.4311	24.624	0.18262	-0.18555	0.15186	NaN	NaN	NaN	NaN	NaN	NaN
0.492	13.461	115.4785	1050.6755	-1.3335	0.85631	-0.29734	-31.6803	-31.1566	1618.775	-3.0776	2.104	-0.48193	-88.4191	9.466	24.132	0.15283	-0.16064	0.14893	NaN	NaN	NaN	NaN	NaN	NaN
0.494	0.887999999999998	137.839	1037.3511	-1.3085	0.83425	-0.2973	-16.748	-38.6049	1626.33	-3.0176	2.0723	-0.51025	-102.48304	60.0069	-4.313	0.13135	-0.14746	0.14111	NaN	NaN	NaN	NaN	NaN	NaN
0.496	-18.575	143.325	1036.578	-1.2882	0.80775	-0.29017	-9.943	36.038	1649.197	-2.9375	2.0215	-0.53418	-97.763	20.9582	4.305	0.083496	-0.11328	0.13281	NaN	NaN	NaN	NaN	NaN	NaN
0.498	-27.078	144.318	1009.2037	-1.2607	0.78825	-0.28066	-41.4088	16.9345	1651.121	-2.7266	1.9043	-0.54883	-99.2674	53.45	29.1551	0.047608	-0.090332	0.13037	NaN	NaN	NaN	NaN	NaN	NaN
0.5	-58.4914	137.798	962.2311	-1.2363	0.76367	-0.26758	-7.19	16.435	1670.4728	-2.6189	1.8752	-0.55933	-88.6309	9.929149	56.304	0.0092773	-0.059082	0.13086	NaN	NaN	NaN	NaN	NaN	NaN
0.502	-77.60744	131.362	946.4178	-1.2111	0.73489	-0.25625	13.746	72.814	1651.4768	-2.5684	1.8945	-0.56836	-75.728	65.357	20.9	-0.032227	-0.014648	0.12256	NaN	NaN	NaN	NaN	NaN	NaN
0.504	-68.0793	131.15	936.3333	-1.1878	0.71028	-0.25001	26.612	12.07388	1660.0493	-2.3823	1.8833	-0.38916	-27.267	37.129382	13.282	-0.05127	0.0053711	0.11475	NaN	NaN	NaN	NaN	NaN	NaN
0.506	-87.48026	133.362	908.3075	-1.1644	0.68528	-0.23869	41.4413	21.7225	1689.054	-2.543	1.9336	-0.53125	-23.744	62.426	11.887	-0.072266	0.044922	0.11084	NaN	NaN	NaN	NaN	NaN	NaN
0.508	-88.6595	144.565	862.733	-1.1405	0.66232	-0.23243	21.83	22.555	1651.611	-2.5742	2.0488	-0.64014	-28.804	10.904	28.4022	-0.083984	0.071045	0.10107	NaN	NaN	NaN	NaN	NaN	NaN
0.51	-106.0592	148.1631	861.3874	-1.1172	0.64258	-0.22363	15.596	-1.475	1641.066	-2.4138	2.0441	-0.6001	-42.157	56.4409	23.8817	-0.097656	0.093262	0.091309	NaN	NaN	NaN	NaN	NaN	NaN
0.512	-94.7595	156.5262	827.2242	-1.086	0.62353	-0.21504	33.755	71.7604	1631.1217	-2.2397	1.9302	-0.53906	14.665	49.934	32.7454	-0.1123	0.11279	0.08252	NaN	NaN	NaN	NaN	NaN	NaN
0.514	-95.4932	159.6802	815.5239	-1.0554	0.5997	-0.20772	38.0948	57.526	1614.1923	-2.043	1.7012	-0.4751	28.586	77.411	55.098	-0.12256	0.12256	0.07373	NaN	NaN	NaN	NaN	NaN	NaN
0.516	-86.37015	168.9337	791.7184	-1.0307	0.57978	-0.20108	18.623	60.104	1628.039	-1.9565	1.6118	-0.45996	19.807	41.0908	88.291	-0.13916	0.13184	0.069824	NaN	NaN	NaN	NaN	NaN	NaN
0.518	-108.724	159.6874	786.0081	-1.0037	0.55976	-0.19033	-6.818	122.004	1606.763	-1.8159	1.4692	-0.45557	-6.33	59.632	76.647	-0.16846	0.14258	0.067383	NaN	NaN	NaN	NaN	NaN	NaN
0.52	-88.8212	169.7553	763.328	-0.97266	0.53711	-0.18652	-14.702	100.3644	1575.66	-1.7507	1.3899	-0.47461	9.475	36.635	45.298	-0.18604	0.15039	0.063965	NaN	NaN	NaN	NaN	NaN	NaN
0.522	-80.3284	159.34084	727.777	-0.94258	0.51817	-0.17793	1.002	132.945	1588.586	-1.7065	1.3306	-0.47559	14.638	52.8671	37.4333	-0.22266	0.16406	0.062012	NaN	NaN	NaN	NaN	NaN	NaN
0.524	-75.532	156.5517	709.3396	-0.91124	0.49668	-0.16845	-36.2608	134.569	1561.66	-1.6714	1.2642	-0.46045	14.447	17.0748	57.5959	-0.24658	0.17188	0.060059	NaN	NaN	NaN	NaN	NaN	NaN
0.526	-57.2112	160.2938	680.8331	-0.8792	0.47324	-0.16025	-62.365	101.2316	1537.455	-1.6616	1.2485	-0.45166	16.109	6.9567	64.228	-0.26904	0.18408	0.061035	NaN	NaN	NaN	NaN	NaN	NaN
0.528	-33.259	168.5239	660.9702	-0.85049	0.44746	-0.15449	-61.223	167.7926	1491.058	-1.6538	1.2368	-0.44678	19.832	-1.1904	48.8451	-0.30469	0.20703	0.061523	NaN	NaN	NaN	NaN	NaN	NaN
0.53	-6.716	175.3539	622.7876	-0.81445	0.42383	-0.14551	-79.8771	152.4937	1436.031	-1.6384	1.2434	-0.45191	5.61	-9.4804	64.71361	-0.32373	0.22266	0.060059	NaN	NaN	NaN	NaN	NaN	NaN
0.532	-8.72000000000001	166.0225	615.811	-0.77979	0.40068	-0.13731	-96.6966	151.517	1461.9983	-1.6094	1.2441	-0.44678	-30.523	-41.7902	110.296	-0.35645	0.25586	0.056641	NaN	NaN	NaN	NaN	NaN	NaN
0.534	16.983	155.9347	617.4604	-0.75	0.37812	-0.12734	-96.6728	174.96404	1438.7136	-1.5566	1.2305	-0.43359	-66.55	-47.76	177.578	-0.37598	0.27661	0.051514	NaN	NaN	NaN	NaN	NaN	NaN
0.536	30.918	159.1723	602.2769	-0.72148	0.36016	-0.11992	-122.945	115.961	1400.4963	-1.5215	1.2129	-0.42236	-44.255	-1.1598	203.2027	-0.39453	0.29883	0.041504	NaN	NaN	NaN	NaN	NaN	NaN
0.538	31.235	161.21487	570.934	-0.68985	0.33701	-0.10957	-92.50918	155.1837	1370.9567	-1.4512	1.1758	-0.39453	-42.306	15.266	274.745	-0.41699	0.32227	0.015137	NaN	NaN	NaN	NaN	NaN	NaN
0.54	25.506	160.269	553.207	-0.66064	0.31543	-0.10547	-107.584	156.2216	1333.373	-1.4063	1.1441	-0.37939	-96.1007	19.228	419.334	-0.42871	0.34473	0.0029297	NaN	NaN	NaN	NaN	NaN	NaN
0.542	6.769	170.85	539.69	-0.63672	0.29785	-0.094922	-96.2851	123.633	1320.6575	-1.3652	1.1094	-0.37207	-132.105	-3.288	592.538	-0.45996	0.3833	-0.029785	NaN	NaN	NaN	NaN	NaN	NaN
0.544	9.079	180.331	516.313	-0.60732	0.28184	-0.089063	-103.4397	178.5357	1281.0801	-1.3159	1.0562	-0.34717	-132.107	7.5266	791.429	-0.49658	0.40869	-0.062012	NaN	NaN	NaN	NaN	NaN	NaN
0.546	-0.0109999999999957	183.434	483.3122	-0.58116	0.26894	-0.076172	-115.2612	173.106	1216.255	-1.2866	1.0225	-0.33228	-120.949	-17.7664	961.057	-0.54297	0.43359	-0.099121	NaN	NaN	NaN	NaN	NaN	NaN
0.548	3.526	166.569	464.307	-0.55771	0.24971	-0.064843	-72.03	184.164	1205.721	-1.2534	0.98877	-0.31641	-166.7492	-37.657	1110.99	-0.625	0.46729	-0.16016	NaN	NaN	NaN	NaN	NaN	NaN
0.55	-14.469	158.71905	455.1543	-0.5376	0.23584	-0.052734	-60.447	218.288	1200.399	-1.2051	0.94922	-0.2998	-145.1402	-109.713	1258.5686	-0.67773	0.49414	-0.19092	NaN	NaN	NaN	NaN	NaN	NaN
0.552	-28.869	157.354	428.6424	-0.51347	0.22773	-0.04668	-92.6256	174.6652	1165.6148	-1.1831	0.93604	-0.29248	-131.489	-88.209	1361.678	-0.8042	0.54639	-0.24951	NaN	NaN	NaN	NaN	NaN	NaN
0.554	-20.919	145.861	395.154	-0.49297	0.21563	-0.038281	-53.459	217.513	1126.136	-1.1313	0.90479	-0.26709	-130.4119	-82.146	1410.0813	-0.93384	0.59986	-0.28833	NaN	NaN	NaN	NaN	NaN	NaN
0.556	-39.961	146.38	385.8836	-0.4707	0.20196	-0.026172	-30.284	231.778	1072.9966	-1.0998	0.88159	-0.24829	-101.963	-26.819	1407.807	-1.0864	0.6626	-0.32129	NaN	NaN	NaN	NaN	NaN	NaN
0.558	-33.775	149.60414	371.8278	-0.44434	0.19306	-0.020019	-51.378	195.17682	1032.758	-1.0659	0.85107	-0.23633	-32.967	-102.598	1426.4826	-1.3262	0.77051	-0.35156	NaN	NaN	NaN	NaN	NaN	NaN
0.56	-63.7796	154.405	337.888799	-0.42041	0.18115	-0.01123	-28.925	219.1409	1003.098	-1.0151	0.80811	-0.2085	27.91	-106.94	1439.063	-1.4551	0.83105	-0.35059	NaN	NaN	NaN	NaN	NaN	NaN
0.562	-69.5279	146.183	324.81012	-0.39492	0.17109	-0.0082033	-46.343	185.5088	953.249	-0.9917	0.78271	-0.20459	94.259	-187.316	1466.971	-1.7222	0.9751	-0.32568	NaN	NaN	NaN	NaN	NaN	NaN
0.564	-94.048	144.323	321.379	-0.37178	0.15908	0.00039062	-47.111	200.5629	932.303	-0.93115	0.72412	-0.18018	107.7401	-181.764	1431.84	-1.9509	1.0842	-0.29395	NaN	NaN	NaN	NaN	NaN	NaN
0.566	-91.342	148.595	302.7357	-0.34991	0.14892	0.0046875	-14.786	242.333	885.397	-0.89209	0.6792	-0.16894	148.054	-250.352	1442.091	-2.2026	1.2095	-0.26416	NaN	NaN	NaN	NaN	NaN	NaN
0.568	-102.998	135.4101	284.2693	-0.32373	0.14072	0.0086913	-47.256	200.5217	865.3913	-0.8501	0.6333	-0.15869	134.603	-207.088	1425.239	-2.5	1.3682	-0.24463	NaN	NaN	NaN	NaN	NaN	NaN
0.57	-93.9221	125.1345	273.9824	-0.30225	0.13281	0.010742	-44.047	236.742	845.978	-0.80029	0.57275	-0.13916	163.483	-209.66	1416.432	-2.6055	1.4297	-0.22656	NaN	NaN	NaN	NaN	NaN	NaN
0.572	-85.794	115.9061	258.273	-0.27793	0.121	0.019629	-70.173	247.887	791.4491	-0.7749	0.54346	-0.12842	161.446	-123.338	1355.912	-2.6831	1.5708	-0.125	NaN	NaN	NaN	NaN	NaN	NaN
0.574	-66.5352	124.3562	229.0468	-0.2585	0.1169	0.02207	-80.319	230.5966	766.42	-0.72607	0.49072	-0.11328	178.114	-138.94	1342.583	-2.6736	1.6584	-0.055908	NaN	NaN	NaN	NaN	NaN	NaN
0.576	-51.6357	113.71333	205.7934	-0.23037	0.1126	0.02793	-48.721	258.675	737.3621	-0.69287	0.45142	-0.10474	169.349	-121.96	1358.131	-2.5879	1.707	-0.0043945	NaN	NaN	NaN	NaN	NaN	NaN
0.578	-46.675	109.8813	197.0753	-0.21074	0.10821	0.033594	-84.126	226.2406	707.031	-0.65381	0.42236	-0.089355	156.996	-167.945	1395.2217	-2.3857	1.7031	0.041016	NaN	NaN	NaN	NaN	NaN	NaN
0.58	-33.527	102.9405	201.671	-0.18848	0.10645	0.038574	-85.269	210.8749	680.62	-0.59961	0.37646	-0.081543	104.864	-165.715	1400.429	-2.2476	1.6802	0.063477	NaN	NaN	NaN	NaN	NaN	NaN
0.582	-28.977	97.3269	176.1024	-0.16719	0.1041	0.043457	-89.216	234.187	611.8842	-0.57227	0.35693	-0.073242	128.039	-173.743	1380.569	-1.959	1.6094	0.11621	NaN	NaN	NaN	NaN	NaN	NaN
0.584	-12.437	94.9206	175.3921	-0.14736	0.10205	0.04707	-113.8974	211.2202	562.4772	-0.5127	0.31104	-0.059082	147.134	-201.883	1401.007	-1.7673	1.5559	0.15113	NaN	NaN	NaN	NaN	NaN	NaN
0.586	-14.901	91.3577	180.1541	-0.12666	0.10283	0.050586	-94.478	230.6372	546.4302	-0.46802	0.27759	-0.056397	195.74	-251.471	1449.513	-1.6035	1.5068	0.16895	NaN	NaN	NaN	NaN	NaN	NaN
0.588	7.715	87.2364	164.7246	-0.10742	0.099608	0.055176	-124.213	223.448	505.5366	-0.42334	0.25049	-0.049805	169.137	-284.827	1485.745	-1.4297	1.4551	0.17383	NaN	NaN	NaN	NaN	NaN	NaN
0.59	8.591	92.006	144.25552	-0.09668	0.097168	0.054199	-138.092	196.698	476.9561	-0.35986	0.20996	-0.041016	171.664	-298.452	1504.0337	-1.3457	1.4297	0.17432	NaN	NaN	NaN	NaN	NaN	NaN
0.592	-12.029	89.998	126.5076	-0.077636	0.094629	0.060351	-88.5127	221.368	434.058	-0.32764	0.19189	-0.033691	105.888	-308.82	1515.717	-1.189	1.3774	0.13916	NaN	NaN	NaN	NaN	NaN	NaN
0.594	4.718	77.507	127.4159	-0.062793	0.091504	0.063965	-114.789	182.67257	403.898	-0.271	0.15576	-0.018066	59.2031	-307.889	1569.2661	-1.0732	1.3261	0.096436	NaN	NaN	NaN	NaN	NaN	NaN
0.596	18.918	83.614	110.1327	-0.046387	0.087988	0.05459	-113.6281	182.7726	410.855	-0.23706	0.12598	-0.0078122	-11.826	-337.942	1613.8857	-0.95654	1.2583	0.042969	NaN	NaN	NaN	NaN	NaN	NaN
0.598	13.776	82.2064	100.8682	-0.033203	0.077149	0.058984	-72.9937	203.407	370.4847	-0.20703	0.10449	0.0024414	-47.4282	-301.036	1632.665	-0.81592	1.1743	-0.038086	NaN	NaN	NaN	NaN	NaN	NaN
0.6	12.866	71.1708	85.49061	-0.019531	0.070801	0.062988	-94.294	175.5983	320.5465	-0.16455	0.074707	0.0092773	-74.0288	-270.1776	1630.0681	-0.75391	1.1309	-0.07373	NaN	NaN	NaN	NaN	NaN	NaN
0.602	10.948	69.6839	89.94465	-0.012109	0.05625	0.065137	-35.943	199.226	299.0475	-0.14893	0.062012	0.017578	-80.112	-207.115	1615.6784	-0.68066	1.0586	-0.12939	NaN	NaN	NaN	NaN	NaN	NaN
0.604	-6.253	66.6314	85.4815	-0.0011719	0.046973	0.064648	-44.182	166.8033	285.442	-0.12695	0.041504	0.025879	-110.444	-223.277	1646.8171	-0.66944	1.0191	-0.14526	NaN	NaN	NaN	NaN	NaN	NaN
0.606	-38.891	66.7686	65.3442	0.0070313	0.034863	0.066602	-42.676	134.049	276.897	-0.11084	0.031739	0.034912	-67.565	-149.874	1655.6545	-0.69141	0.98828	-0.15869	NaN	NaN	NaN	NaN	NaN	NaN
0.608	-24.323	60.9334	62.39972	0.013477	0.025684	0.061816	-2.184	153.1051	249.445	-0.1001	0.014648	0.041504	-26.4471	-152.081	1642.654	-0.77148	0.95508	-0.1748	NaN	NaN	NaN	NaN	NaN	NaN
0.61	-54.676	55.0413	75.7001	0.020508	0.017578	0.062012	-19.77	128.4363	209.9674	-0.093262	0.003418	0.048828	-3.05684	-83.7577	1627.138	-0.81836	0.93945	-0.18018	NaN	NaN	NaN	NaN	NaN	NaN
0.612	-45.996	52.8775	59.5553	0.030273	0.0080078	0.060937	-6.287	117.473	189.1377	-0.090332	0.0014648	0.056641	-8.109	-121.214	1665.789	-0.9458	0.92432	-0.22021	NaN	NaN	NaN	NaN	NaN	NaN
0.614	-66.2011	43.3468	50.9606	0.034961	-0.0024414	0.062207	24.612	117.0044	177.3132	-0.096191	-0.0019531	0.06543	-7.01	-73.6043	1691.908	-1.0715	0.93481	-0.26928	NaN	NaN	NaN	NaN	NaN	NaN
0.616	-79.8803	38.1173	57.98181	0.042774	-0.011426	0.061035	-2.924	87.3453	161.901	-0.10108	-0.0024414	0.074707	-29.10154	-110.186	1709.48214	-1.207	0.9668	-0.30908	NaN	NaN	NaN	NaN	NaN	NaN
0.618	-86.302	36.4508	61.1946	0.046778	-0.016309	0.058789	22.357	113.7976	134.2424	-0.11035	-0.0039063	0.087891	-37.6651	-46.06164	1713.254	-1.4453	1.0664	-0.33691	NaN	NaN	NaN	NaN	NaN	NaN
0.62	-80.6582	41.4817	47.8532	0.048828	-0.021484	0.061523	16.528	110.254	112.27291	-0.12842	0.0092773	0.10352	-39.131	-126.375	1747.173	-1.5879	1.1387	-0.32227	NaN	NaN	NaN	NaN	NaN	NaN
0.622	-83.9093	33.526	25.418	0.052051	-0.027832	0.065332	-6.46400000000001	83.6263	111.0712	-0.13818	0.014648	0.10791	-54.8758	-109.905	1771.12	-1.9673	1.3345	-0.34131	NaN	NaN	NaN	NaN	NaN	NaN
0.624	-81.3614	25.083	28.59	0.055859	-0.034961	0.067871	29.084	91.871	110.941	-0.1582	0.027832	0.12402	-37.9958	-165.7463	1788.503	-2.2679	1.5081	-0.36084	NaN	NaN	NaN	NaN	NaN	NaN
0.626	-64.53722	26.3493	41.6706	0.061328	-0.041992	0.070996	-27.568	67.228248	73.667	-0.17383	0.042969	0.13404	0.288000000000004	-69.014	1775.6446	-2.5522	1.6919	-0.36865	NaN	NaN	NaN	NaN	NaN	NaN
0.628	-64.03655	37.1005	25.985	0.064062	-0.045996	0.077148	-12.365	66.39479	70.8517	-0.18652	0.055664	0.14453	67.252	-89.829	1781.7898	-2.8809	1.9199	-0.33594	NaN	NaN	NaN	NaN	NaN	NaN
0.63	-58.1639	36.44722	26.5751	0.069824	-0.049316	0.081055	15.945	67.938	67.1544	-0.19434	0.074707	0.15479	75.014	-24.15	1773.3393	-3.0117	2.0313	-0.31055	NaN	NaN	NaN	NaN	NaN	NaN
0.632	-43.387	26.6637	28.3123	0.070996	-0.053028	0.081836	-51.8004	29.7522	56.422747	-0.19727	0.080566	0.15625	95.359	-70.7301	1757.0322	-3.166	2.2031	-0.24902	NaN	NaN	NaN	NaN	NaN	NaN
0.634	-36.898	25.6251	38.0684	0.078223	-0.058984	0.084179	-36.81	44.0534	46.2098	-0.19727	0.092773	0.1626	81.8219	14.42021	1718.7291	-3.156	2.262	-0.20752	NaN	NaN	NaN	NaN	NaN	NaN
0.636	-35.833	35.6814	29.92332	0.083301	-0.0625	0.088086	-66.9128	32.8348	8.256	-0.19311	0.10278	0.17188	105.883	-14.49	1704.9195	-3.0742	2.2676	-0.18848	NaN	NaN	NaN	NaN	NaN	NaN
0.638	-29.634	30.68	31.9098	0.090039	-0.069824	0.092969	-77.5445	15.452	11.966	-0.18555	0.10303	0.17334	84.0378	60.5194	1708.802	-2.8647	2.2075	-0.18457	NaN	NaN	NaN	NaN	NaN	NaN
0.64	-0.436999999999998	37.099	42.8013	0.094238	-0.071289	0.091797	-40.287	17.7763	20.186	-0.17236	0.104	0.17285	51.0323	16.8277	1738.909	-2.7397	2.1685	-0.17529	NaN	NaN	NaN	NaN	NaN	NaN
0.642	5.153	29.032	34.3051	0.091211	-0.075781	0.098535	-95.281	-1.4353	19.726	-0.16162	0.10547	0.17285	26.709	86.807	1683.0369	-2.5117	2.0742	-0.1626	NaN	NaN	NaN	NaN	NaN	NaN
0.644	5.507	31.1997	23.9427	0.093066	-0.070606	0.098535	-59.8345	13.582	25.61504	-0.1499	0.097656	0.18066	8.416	48.133	1646.647	-2.3757	2.0168	-0.15821	NaN	NaN	NaN	NaN	NaN	NaN
0.646	8.272	19.80454	20.8377	0.089942	-0.077637	0.10557	-61.738	33.064	10.38	-0.1416	0.090332	0.18066	-14.618	100.193	1645.208	-2.2671	1.9692	-0.15039	NaN	NaN	NaN	NaN	NaN	NaN
0.648	21.312	22.5447	34.0505	0.083301	-0.077344	0.10352	-94.839	23.5117	22.962	-0.13184	0.078125	0.17822	-58.4597	39.3418	1681.1913	-2.1284	1.8638	-0.13965	NaN	NaN	NaN	NaN	NaN	NaN
0.65	25.191	20.8558	31.4592	0.078613	-0.075684	0.10645	-50.117	29.6787	38.3227	-0.11719	0.062012	0.17725	-84.297	74.305	1651.3322	-2.0625	1.7871	-0.15088	NaN	NaN	NaN	NaN	NaN	NaN
0.652	-9.026	21.8605	42.8504	0.071093	-0.071289	0.11006	-60.8321	39.584	0.994999999999999	-0.10547	0.048828	0.1792	-75.9637	14.1984	1607.0076	-1.9258	1.6309	-0.15576	NaN	NaN	NaN	NaN	NaN	NaN
0.654	17.513	-3.9643	60.6748	0.063769	-0.064844	0.1127	-65.6071	40.4259	0.1461	-0.086426	0.025879	0.17822	-110.0718	49.301	1574.89	-1.8218	1.5234	-0.15991	NaN	NaN	NaN	NaN	NaN	NaN
0.656	-2.992	-2.368	85.9076	0.053223	-0.058984	0.11778	-21.886	50.179	12.3708	-0.066162	0.0056154	0.17627	-95.039	-7.57100000000001	1599.52	-1.7339	1.4341	-0.16211	NaN	NaN	NaN	NaN	NaN	NaN
0.658	5.317	-2.672	80.67317	0.044043	-0.047364	0.1168	-48.1976	34.88	13.319	-0.04541	-0.012695	0.1709	-103.584	35.884	1588.124	-1.6519	1.3306	-0.17383	NaN	NaN	NaN	NaN	NaN	NaN
0.66	-39.6222	-5.855	76.0125	0.03418	-0.038086	0.1123	-18.436	35.62184	35.7842	-0.012695	-0.047363	0.16162	-70.276	31.201	1548.253	-1.6191	1.2871	-0.17383	NaN	NaN	NaN	NaN	NaN	NaN
0.662	-42.096	-24.063	108.5307	0.027149	-0.023047	0.11338	14.013	40.695	26.92367	0.0063477	-0.060059	0.15918	-75.8411	123.393	1502.9663	-1.5879	1.2158	-0.17676	NaN	NaN	NaN	NaN	NaN	NaN
0.664	-64.7	-42.7965	147.828	0.019629	-0.011426	0.11474	-24.259	27.3498	12.8348	0.044922	-0.091797	0.15283	-74.459	115.861	1497.2315	-1.564	1.1724	-0.17334	NaN	NaN	NaN	NaN	NaN	NaN
0.666	-88.0347	-52.0737	167.747	0.010644	0.0010742	0.10302	19.609	42.203	44.258	0.079101	-0.11841	0.1499	-88.3287	164.63279	1474.202	-1.5581	1.1646	-0.17529	NaN	NaN	NaN	NaN	NaN	NaN
0.668	-102.6306	-38.3648	261.776	-0.0001953	0.014062	0.092578	36.137	51.955	31.135	0.10547	-0.14453	0.14258	-84.088	156.689	1433.3757	-1.5425	1.1431	-0.17285	NaN	NaN	NaN	NaN	NaN	NaN
0.67	-98.696	-28.3472	370.268	-0.0039063	0.022461	0.080078	1.902	28.4191	38.257	0.14209	-0.17578	0.12695	-53.363	200.893	1382.893	-1.5203	1.135	-0.17236	NaN	NaN	NaN	NaN	NaN	NaN
0.672	-110.839	-33.3527	464.258	-0.014355	0.040625	0.075	23.018	26.566	38.057	0.16357	-0.18848	0.12451	-45.766	165.514	1356.5587	-1.4819	1.1255	-0.17383	NaN	NaN	NaN	NaN	NaN	NaN
0.674	-169.3567	-33.2275	519.446	-0.031348	0.055664	0.070703	-4.176	6.86258	28.0464	0.19971	-0.22021	0.11768	-52.512	174.3754	1324.8988	-1.418	1.1074	-0.17676	NaN	NaN	NaN	NaN	NaN	NaN
0.676	-153.8525	-54.5012	558.46	-0.052441	0.068945	0.063672	17.777	8.63	42.0112	0.22535	-0.24243	0.11133	-44.863	173.071	1303.7889	-1.377	1.0977	-0.18213	NaN	NaN	NaN	NaN	NaN	NaN
0.678	-112.407	-68.672	611.0523	-0.083985	0.08164	0.053907	35.362	24.1247	39.2131	0.24805	-0.26416	0.10889	19.485	227.7337	1237.5716	-1.2949	1.0801	-0.1792	NaN	NaN	NaN	NaN	NaN	NaN
0.68	-98.8935	-44.653	696.37	-0.12305	0.09375	0.040527	-41.805	30.1556	40.7566	0.27344	-0.28613	0.10352	82.884	254.5074	1165.914	-1.238	1.0657	-0.17846	NaN	NaN	NaN	NaN	NaN	NaN
0.682	-114.018	-25.404	723.582	-0.16777	0.10977	0.019531	-0.43	35.066	52.112	0.28223	-0.29883	0.10107	108.329	274.141	1122.897	-1.1831	1.0493	-0.1748	NaN	NaN	NaN	NaN	NaN	NaN
0.684	-101.923	-31.234	724.4893	-0.22031	0.12979	-9.768e-05	-11.157	45.16	36.047	0.29883	-0.31543	0.1001	91.167	255.713	1111.827	-1.1133	1.0254	-0.1709	NaN	NaN	NaN	NaN	NaN	NaN
0.686	-43.297	-48.1908	743.5388	-0.28282	0.15869	-0.015723	-45.817	30.08671	38.407	0.30225	-0.32129	0.10132	120.206	263.4891	1103.5627	-1.0801	1.0117	-0.16602	NaN	NaN	NaN	NaN	NaN	NaN
0.688	-17.75822	-33.1561	774.0307	-0.35577	0.18995	-0.026563	-18.146	25.4979	42.7298	0.29785	-0.32764	0.10059	116.275	272.973	1081.19051	-1.0151	0.99072	-0.15674	NaN	NaN	NaN	NaN	NaN	NaN
0.69	-9.52912	-19.051	816.2825	-0.43945	0.22412	-0.043945	-72.538	15.4898	16.7796	0.28662	-0.32227	0.11182	122.622	289.264	1053.713	-0.96656	0.96802	-0.15308	NaN	NaN	NaN	NaN	NaN	NaN
0.692	29.12801	-30.079	851.2907	-0.55147	0.25908	-0.05752	-67.9489	7.606	38.4034	0.27442	-0.31421	0.10743	93.378	282.753	1029.559	-0.91553	0.93799	-0.15479	NaN	NaN	NaN	NaN	NaN	NaN
0.694	47.0872	-32.0083	878.698	-0.67773	0.31201	-0.05791	-45.768	15.964	23.764	0.25977	-0.30762	0.10889	97.243	288.128	986.11	-0.83789	0.88477	-0.14404	NaN	NaN	NaN	NaN	NaN	NaN
0.696	58.9967	-38.237	901.123	-0.81914	0.38233	-0.065723	-95.525	8.808	15.424	0.23877	-0.28516	0.10938	43.158	298.343	899.347	-0.79639	0.85107	-0.14502	NaN	NaN	NaN	NaN	NaN	NaN
0.698	59.753	-16.865	932.006	-0.98701	0.4585	-0.066992	-58.9797	5.544	29.515466	0.23242	-0.26807	0.11084	35.496	305.476	851.283	-0.71338	0.77881	-0.14746	NaN	NaN	NaN	NaN	NaN	NaN
0.7	75.24	5.665	941.609	-1.1636	0.53955	-0.066895	-73.9805	17.3267	15.6296	0.2124	-0.2417	0.11816	35.529	292.757	833.912	-0.65503	0.72534	-0.15064	NaN	NaN	NaN	NaN	NaN	NaN
0.702	47.0542	10.289	942.5817	-1.3338	0.63262	-0.075391	-80.002	18.1426	32.111	0.19727	-0.21973	0.11963	47.341	268.8618	815.063	-0.60352	0.66797	-0.15771	NaN	NaN	NaN	NaN	NaN	NaN
0.704	44.9675	-24.207	932.9711	-1.493	0.73476	-0.080566	-25.475	15.6539	38.02	0.18115	-0.19775	0.12109	18.2878	263.3942	758.319	-0.54639	0.59521	-0.16016	NaN	NaN	NaN	NaN	NaN	NaN
0.706	-5.746	-72.254	931.2049	-1.6387	0.84844	-0.082129	-93.059	12.8131	21.3093	0.15869	-0.16602	0.12158	38.7858	251.944	692.2233	-0.51953	0.55762	-0.16113	NaN	NaN	NaN	NaN	NaN	NaN
0.708	34.684	-102.5566	954.544	-1.7614	0.96201	-0.083594	-63.0461	-14.088	33.7888	0.15479	-0.15283	0.12354	3.062	263.97813	654.711	-0.47119	0.48975	-0.16943	NaN	NaN	NaN	NaN	NaN	NaN
0.71	42.1177	-114.1254	958.3059	-1.8628	1.0757	-0.084473	-22.006	-5.6721	22.079	0.13281	-0.12305	0.12451	-1.0924	263.124	645.953	-0.4436	0.44287	-0.17041	NaN	NaN	NaN	NaN	NaN	NaN
0.712	44.471	-123.079	949.1732	-1.935	1.1822	-0.087598	-49.7628	3.596	11.162	0.12207	-0.10498	0.12671	-36.1479	264.9479	609.124	-0.41064	0.39893	-0.17041	NaN	NaN	NaN	NaN	NaN	NaN
0.714	42.649	-148.34197	957.8558	-1.9715	1.277	-0.088086	11.67	12.0344	27.2056	0.10889	-0.088379	0.12646	-41.917	254.0145	533.941	-0.37158	0.35107	-0.17285	NaN	NaN	NaN	NaN	NaN	NaN
0.716	31.153	-168.692	974.4465	-1.964	1.3407	-0.094726	-13.683	39.568	0.100000000000001	0.087891	-0.061035	0.13086	-83.45	254.95	472.7941	-0.35205	0.32422	-0.17334	NaN	NaN	NaN	NaN	NaN	NaN
0.718	1.806	-173.433	1003.3259	-1.9133	1.3701	-0.099122	-24.591	32.688	14.7729	0.078613	-0.053711	0.12744	-98.677	218.0733	452.2914	-0.30127	0.26855	-0.16748	NaN	NaN	NaN	NaN	NaN	NaN
0.72	-26.457	-165.273	1013.0056	-1.832	1.3574	-0.11035	35.185	28.0366	20.4298	0.055176	-0.033203	0.12695	-111.121	212.5318	410.6593	-0.26367	0.22657	-0.17456	NaN	NaN	NaN	NaN	NaN	NaN
0.722	-30.524	-166.416	1058.2212	-1.7263	1.3124	-0.1212	-2.294	33.074	8.0973	0.040039	-0.014649	0.1233	-71.658	181.471	372.8021	-0.22217	0.18213	-0.17969	NaN	NaN	NaN	NaN	NaN	NaN
0.724	-81.0613	-160.1584	1080.689	-1.6016	1.2343	-0.12305	18.792	11.2668	29.0028	0.02002	0.0014648	0.12646	-45.6731	187.436	308.22069	-0.15576	0.12695	-0.1875	NaN	NaN	NaN	NaN	NaN	NaN
0.726	-113.545	-135.172	1082.622	-1.4813	1.1484	-0.1164	29.766	16.9131	21.8291	-0.0078125	0.03125	0.12109	-25.9334	132.367	291.4089	-0.12842	0.099609	-0.18848	NaN	NaN	NaN	NaN	NaN	NaN
0.728	-105.936	-120.949	1073.3479	-1.3714	1.0667	-0.10215	-14.181	23.4353	13.8697	-0.021973	0.046387	0.12354	-25.795	113.228	249.8939	-0.072754	0.049316	-0.19482	NaN	NaN	NaN	NaN	NaN	NaN
0.73	-122.475	-128.896	1077.569	-1.2866	0.99463	-0.088379	30.887	12.5676	27.0097	-0.057129	0.081055	0.12598	3.219	102.453	221.7932	-0.037354	0.014893	-0.20312	NaN	NaN	NaN	NaN	NaN	NaN
0.732	-110.31	-127.45	1099.372	-1.22	0.94658	-0.083106	8.436	43.307	5.235	-0.076416	0.10351	0.12305	23.63	138.347	142.142	-0.0068359	-0.023438	-0.20605	NaN	NaN	NaN	NaN	NaN	NaN
0.734	-108.703	-145.646	1124.924	-1.1656	0.9082	-0.08418	-32.544	44.0236	18.9426	-0.099121	0.12207	0.12158	33.2601	139.9669	107.731	0.0043945	-0.066406	-0.21094	NaN	NaN	NaN	NaN	NaN	NaN
0.736	-86.28865	-145.6671	1141.044	-1.1066	0.88828	-0.085352	8.771	3.883	66.4085	-0.12061	0.15723	0.12109	10.478	134.2132	78.388	0.0068359	-0.080566	-0.21436	NaN	NaN	NaN	NaN	NaN	NaN
0.738	-92.155	-145.614	1176.336	-1.0469	0.87246	-0.091211	-44.419	-15.05	64.902	-0.13184	0.16943	0.12012	3.311	92.2981	89.644	-0.0024414	-0.11133	-0.21924	NaN	NaN	NaN	NaN	NaN	NaN
0.74	-61.3381	-138.85	1209.411	-0.99365	0.86084	-0.104	-26.355	-48.7576	114.2146	-0.14844	0.19678	0.11572	15.417	98.2453	73.95	-0.021973	-0.12232	-0.22095	NaN	NaN	NaN	NaN	NaN	NaN
0.742	-40.543	-152.585	1232.4457	-0.95274	0.84649	-0.10752	-3.216	-25.265	124.563	-0.16431	0.20948	0.097412	38.7389	82.363	76.2284	-0.049805	-0.12842	-0.22314	NaN	NaN	NaN	NaN	NaN	NaN
0.744	-64.73903	-142.663	1254.296	-0.92148	0.83203	-0.11699	-87.066	-34.6647	186.408	-0.18164	0.22656	0.086914	46.842	99.316	61.174	-0.088867	-0.13721	-0.21582	NaN	NaN	NaN	NaN	NaN	NaN
0.746	-53.6037	-150.0603	1279.44	-0.89766	0.8168	-0.10957	-65.016	-39.6297	256.80731	-0.20752	0.24512	0.075684	46.0201	76.312	65.0943	-0.11084	-0.13379	-0.21631	NaN	NaN	NaN	NaN	NaN	NaN
0.748	-49.2627	-136.955	1307.70732	-0.88965	0.80937	-0.11445	-105.2564	17.9917	291.175	-0.22266	0.25684	0.068359	47.515	88.451	10.964	-0.14795	-0.11768	-0.21973	NaN	NaN	NaN	NaN	NaN	NaN
0.75	-6.97499999999999	-138.672	1321.7339	-0.88574	0.80273	-0.10742	-93.7698	55.861	436.36	-0.26904	0.27393	0.051758	15.291	66.374	-10.16	-0.16895	-0.10669	-0.22412	NaN	NaN	NaN	NaN	NaN	NaN
0.752	-17.737	-136.614	1340.678	-0.88252	0.80029	-0.10361	-64.761	77.7368	603.758	-0.31323	0.28662	0.04126	29.968	69.7459	-15.935	-0.18945	-0.089844	-0.229	NaN	NaN	NaN	NaN	NaN	NaN
0.754	12.972	-133.653	1346.069	-0.87139	0.78974	-0.09834	-105.2975	64.57553	747.71	-0.3667	0.30029	0.019531	15.737	19.6608	35.786	-0.21387	-0.078613	-0.24121	NaN	NaN	NaN	NaN	NaN	NaN
0.756	8.69	-130.218	1350.5627	-0.84834	0.76905	-0.095215	-70.9189	17.405	859.59755	-0.44873	0.33057	-0.011719	-0.338999999999999	30.21	33.8401	-0.22168	-0.070801	-0.23926	NaN	NaN	NaN	NaN	NaN	NaN
0.758	21.018	-115.8245	1347.0596	-0.82442	0.73828	-0.096094	-30.0981	-11.1463	911.576	-0.49951	0.35205	-0.023926	-35.498	28.3788	47.3534	-0.24316	-0.05127	-0.24805	NaN	NaN	NaN	NaN	NaN	NaN
0.76	38.7993	-108.937	1365.1017	-0.80127	0.69775	-0.094238	-89.202	-33.1082	980.879	-0.61523	0.39844	-0.046875	-60.634	66.802	15.676	-0.26904	-0.042236	-0.25171	NaN	NaN	NaN	NaN	NaN	NaN
0.762	38.213	-114.943	1379.407	-0.78984	0.65059	-0.09668	-68.861	-40.633	1067.912	-0.72949	0.4458	-0.062744	-75.657	46.686	52.673	-0.29541	-0.03125	-0.24902	NaN	NaN	NaN	NaN	NaN	NaN
0.764	48.13	-105.416	1372.54	-0.80625	0.60469	-0.10029	-83.895	-4.619	1053.416	-0.85889	0.50049	-0.078125	-59.772	53.942	66.026	-0.33545	-0.015625	-0.25146	NaN	NaN	NaN	NaN	NaN	NaN
0.766	19.268	-95.951	1362.4693	-0.84453	0.56875	-0.10341	-85.5585	-16.999	1019.658	-1.0698	0.59229	-0.098145	-93.3106	37.887	80.001	-0.35693	-0.003418	-0.24414	NaN	NaN	NaN	NaN	NaN	NaN
0.768	-6.029	-78.0539	1372.723	-0.91816	0.55723	-0.11065	-10.922	-55.5708	1010.811	-1.1938	0.65381	-0.097656	-92.7486	57.5521	45.3247	-0.41113	0.012207	-0.2373	NaN	NaN	NaN	NaN	NaN	NaN
0.77	-35.791	-65.608	1386.232	-1.0171	0.55322	-0.11572	-24.1317	-90.38	1004.9215	-1.4556	0.78174	-0.10303	-117.24	29.043	64.5527	-0.44678	0.03125	-0.23437	NaN	NaN	NaN	NaN	NaN	NaN
0.772	-28.625	-54.138	1385.7574	-1.1323	0.57881	-0.10889	10.542	-136.511	1045.837	-1.6619	0.88891	-0.099608	-99.9645	30.612	67.1405	-0.48633	0.047363	-0.2251	NaN	NaN	NaN	NaN	NaN	NaN
0.774	-53.278	-56.791	1389.6988	-1.2679	0.62471	-0.090723	51.961	-127.981	1059.048	-1.8594	0.99609	-0.097168	-88.0745	17.6819	76.969	-0.53076	0.075684	-0.20947	NaN	NaN	NaN	NaN	NaN	NaN
0.776	-93.3972	-58.23	1388.79892	-1.4144	0.68135	-0.090332	23.588	-135.953	1034.035	-2.0796	1.145	-0.087402	-79.487	33.649	26.162	-0.55029	0.088867	-0.20166	NaN	NaN	NaN	NaN	NaN	NaN
0.778	-92.9335	-68.3274	1421.51014	-1.5681	0.75068	-0.10762	50.896	-156.311	1028.434	-2.1636	1.2134	-0.085449	-97.655	10.838	26.6729	-0.57373	0.11719	-0.18604	NaN	NaN	NaN	NaN	NaN	NaN
0.78	-121.063	-76.169	1408.5905	-1.7202	0.84424	-0.12451	32.752	-93.19	1000.4711	-2.271	1.3403	-0.082031	-77.44269	9.293	32.50289	-0.58032	0.13965	-0.16919	NaN	NaN	NaN	NaN	NaN	NaN
0.782	-107.9436	-72.445	1400.6339	-1.8783	0.95645	-0.13067	5.218	-70.663	1001.6393	-2.2771	1.4148	-0.081055	-87.988	-22.0889	60.707	-0.57764	0.15723	-0.15479	NaN	NaN	NaN	NaN	NaN	NaN
0.784	-107.42938	-66.738	1411.53298	-2.0362	1.0849	-0.13028	60.959	-35.83	1022.431	-2.2207	1.4551	-0.085449	-48.367	6.006	53.845	-0.55469	0.17725	-0.13672	NaN	NaN	NaN	NaN	NaN	NaN
0.786	-93.7121	-61.495	1417.1678	-2.1873	1.2197	-0.1248	-8.857	-43.779	1025.39	-2.0444	1.4497	-0.092773	-27.482	2.826	31.9863	-0.53662	0.18262	-0.125	NaN	NaN	NaN	NaN	NaN	NaN
0.788	-121.4373	-61.935	1428.1779	-2.3174	1.3594	-0.12285	-74.402	-120.941	1052.6335	-1.9272	1.4321	-0.097656	-3.34	13.24	28.4457	-0.47949	0.17969	-0.11328	NaN	NaN	NaN	NaN	NaN	NaN
0.79	-138.951	-60.79	1414.055	-2.418	1.4961	-0.12354	-39.74284	-172.41	1033.184	-1.689	1.3813	-0.079102	-19.18	-12.4925	22.55	-0.42017	0.17309	-0.1045	NaN	NaN	NaN	NaN	NaN	NaN
0.792	-127.5	-53.7102	1425.63209	-2.4659	1.6099	-0.12725	-74.4122	-233.437	1022.241	-1.543	1.333	-0.059814	-2.709	8.3365	20.439	-0.35303	0.15283	-0.091309	NaN	NaN	NaN	NaN	NaN	NaN
0.794	-130.859	-29.054	1430.235	-2.4667	1.6876	-0.1292	-16.023	-257.95	1046.6932	-1.4336	1.2793	-0.03125	22.932	16.8861	17.182	-0.25439	0.10059	-0.09082	NaN	NaN	NaN	NaN	NaN	NaN
0.796	-98.1413	-16.656	1429.817	-2.4183	1.7126	-0.13467	-20.066	-227.2822	1052.9497	-1.3418	1.2051	0.0019531	59.8315	24.1485	32.9504	-0.20557	0.077148	-0.089844	NaN	NaN	NaN	NaN	NaN	NaN
0.798	-137.6844	-13.273	1409.0056	-2.3486	1.7023	-0.14717	-43.784	-267.537	1083.118	-1.3042	1.1724	0.016602	41.892	1.21458	29.012	-0.10498	0.026855	-0.083008	NaN	NaN	NaN	NaN	NaN	NaN
0.8	-103.2221	-10.409	1399.83694	-2.2607	1.6582	-0.15674	0.00800000000000267	-259.903	1128.959	-1.2368	1.1255	0.029785	31.677	-1.497	17.3751	-0.043701	-0.0019533	-0.079101	NaN	NaN	NaN	NaN	NaN	NaN
0.802	-84.212	-4.766	1387.1398	-2.1575	1.5886	-0.16123	-56.5884	-244.323	1151.416	-1.1609	1.0935	0.026123	10.313	-0.4636	-23.18172	0.013672	-0.038086	-0.082031	NaN	NaN	NaN	NaN	NaN	NaN
0.804	-57.317	3.4877	1384.379	-2.0464	1.5055	-0.15791	-69.1	-262.088	1248.263	-1.0742	1.0547	0.016602	18.38	41.6978	-26.1462	0.083496	-0.074219	-0.081055	NaN	NaN	NaN	NaN	NaN	NaN
0.806	-42.383	-5.6671	1375.952	-1.9479	1.4259	-0.14814	-48.286	-212.895	1293.3802	-0.94141	1.002	0.0039063	29.392	44.061	-6.2178	0.11719	-0.083008	-0.080566	NaN	NaN	NaN	NaN	NaN	NaN
0.808	-6.209	-16.7231	1359.94731	-1.8648	1.3555	-0.13994	-131.164	-196.3336	1310.533	-0.87842	0.97119	-0.0019531	0.737000000000002	56.003	26.1487	0.17871	-0.10791	-0.08252	NaN	NaN	NaN	NaN	NaN	NaN
0.81	-2.56	-6.5686	1343.095	-1.7944	1.2974	-0.12988	-131.797	-159.67	1333.126	-0.75732	0.90674	-0.011719	-20.421	43.441	23.897	0.21753	-0.12744	-0.085449	NaN	NaN	NaN	NaN	NaN	NaN
0.812	-22.296	-10.96277	1313.4431	-1.7441	1.2465	-0.13125	-132.45	-93.569	1297.409	-0.68653	0.86181	-0.020264	-39.048	52.912	35.6959	0.25977	-0.15039	-0.089844	NaN	NaN	NaN	NaN	NaN	NaN
0.814	-10.95	-7.3388	1329.848	-1.6968	1.2016	-0.12862	-136.608	-128.076	1327.1296	-0.63379	0.81641	-0.039551	-55.976	48.186	14.9616	0.31006	-0.17871	-0.091797	NaN	NaN	NaN	NaN	NaN	NaN
0.816	-13.175	-10.7104	1316.26	-1.6528	1.1668	-0.13134	-100.2473	-131.77	1382.2861	-0.59521	0.76416	-0.072754	-67.0962	54.103	53.482	0.33277	-0.19727	-0.095703	NaN	NaN	NaN	NaN	NaN	NaN
0.818	-40.994	7.034	1289.646	-1.6074	1.1391	-0.13545	-118.7561	-123.525	1397.499	-0.58545	0.73389	-0.097168	-60.317	52.24	34.748	0.35059	-0.21924	-0.10303	NaN	NaN	NaN	NaN	NaN	NaN
0.82	-49.55	25.776	1264.5268	-1.5703	1.1094	-0.13818	-93.126	-148.183431	1431.498	-0.5874	0.70361	-0.15039	-70.5892	59.677	33.7602	0.35938	-0.24023	-0.10889	NaN	NaN	NaN	NaN	NaN	NaN
0.822	-52.09	33.823	1247.327	-1.5411	1.0827	-0.14649	-35.104	-115.84172	1432.184	-0.61841	0.67749	-0.18457	-86.5432	47.2158	13.797	0.35498	-0.25586	-0.11084	NaN	NaN	NaN	NaN	NaN	NaN
0.824	-39.679	31.489	1233.1609	-1.5086	1.0559	-0.15117	-53.062	-160.4	1449.3779	-0.66553	0.66357	-0.2085	-89.6776	21.7345	43.73	0.34375	-0.27002	-0.11377	NaN	NaN	NaN	NaN	NaN	NaN
0.826	-62.557	45.3547	1215.0839	-1.482	1.0293	-0.15352	-56.321	-188.808	1497.67	-0.76904	0.6665	-0.21338	-106.907	15.419	53.472	0.3291	-0.27344	-0.1145	NaN	NaN	NaN	NaN	NaN	NaN
0.828	-64.424	43.0094	1200.6464	-1.4536	1.0081	-0.15263	-32.967	-149.061	1499.925	-0.82764	0.67334	-0.21143	-97.2032	37.91	58.563	0.3125	-0.27051	-0.11328	NaN	NaN	NaN	NaN	NaN	NaN
0.83	-69.721	47.987	1182.974	-1.4258	0.98828	-0.15869	-83.798	-163.426	1496.879	-0.95898	0.70898	-0.20947	-93.11046	48.4903	36.6405	0.28564	-0.26367	-0.11572	NaN	NaN	NaN	NaN	NaN	NaN
0.832	-56.437	61.978	1170.4745	-1.3986	0.9709	-0.16074	-47.677	-127.868	1547.636	-1.0752	0.75	-0.21753	-102.153	44.285	59.5362	0.27002	-0.25684	-0.11572	NaN	NaN	NaN	NaN	NaN	NaN
0.834	-89.098	68.418	1154.8519	-1.3715	0.9543	-0.16133	-72.022	-105.879	1578.742	-1.1973	0.80859	-0.23096	-78.083	30.9118	65.229	0.24121	-0.24219	-0.11816	NaN	NaN	NaN	NaN	NaN	NaN
0.836	-105.4949	79.98647	1127.5834	-1.3461	0.94531	-0.15859	-72.71	-139.096	1594.827	-1.3691	0.91309	-0.25391	-66.4286	10.921	88.609	0.2229	-0.22534	-0.11987	NaN	NaN	NaN	NaN	NaN	NaN
0.838	-97.5806	68.5215	1130.1286	-1.3258	0.93477	-0.1584	-22.946	-100.323	1575.751	-1.519	1.0161	-0.25537	-48.982	22.077	50.963	0.20264	-0.2124	-0.12842	NaN	NaN	NaN	NaN	NaN	NaN
0.84	-129.857	81.3907	1096.6629	-1.3105	0.92969	-0.1543	-72.922	-121.311	1538.3508	-1.6987	1.1421	-0.23877	-46.6797	20.683	33.2986	0.18164	-0.18848	-0.1416	NaN	NaN	NaN	NaN	NaN	NaN
0.842	-144.143	77.3972	1083.4158	-1.2894	0.92451	-0.15127	-55.738	-122.741	1554.2931	-1.998	1.3418	-0.21436	-17.195	26.38	17.124	0.17627	-0.17725	-0.13623	NaN	NaN	NaN	NaN	NaN	NaN
0.844	-137.192	79.5856	1080.10044	-1.2753	0.91572	-0.14902	-40.156	-64.626	1531.461	-2.1616	1.4438	-0.2041	-25.704	12.1425	46.252	0.15674	-0.16895	-0.1499	NaN	NaN	NaN	NaN	NaN	NaN
0.846	-89.1413	79.64767	1063.3791	-1.2616	0.90908	-0.14317	-104.829	-72.863	1531.1474	-2.4937	1.6372	-0.17871	12.087	22.544	36.6098	0.14575	-0.16113	-0.15845	NaN	NaN	NaN	NaN	NaN	NaN
0.848	-90.3467	96.4214	1046.2162	-1.24	0.89863	-0.13691	-47.49	-27.7785	1561.03819	-2.7068	1.7776	-0.1477	28.742	6.0176	46.0401	0.13867	-0.15723	-0.16602	NaN	NaN	NaN	NaN	NaN	NaN
0.85	-67.2979	104.6586	1017.2821	-1.2222	0.87842	-0.13281	-85.512	-33.884	1552.66	-2.8628	1.9106	-0.12451	43.356	-6.848	25.6339	0.13477	-0.1499	-0.16846	NaN	NaN	NaN	NaN	NaN	NaN
0.852	-66.04358	95.742	1004.0114	-1.1915	0.86465	-0.12969	-149.2118	-74.705	1567.6553	-2.9663	2.063	-0.10352	13.329	-32.5326	46.43	0.13623	-0.15137	-0.17285	NaN	NaN	NaN	NaN	NaN	NaN
0.854	-31.657	101.294	984.1365	-1.1684	0.84063	-0.12705	-120.36	-20.252	1573.1863	-2.9609	2.1191	-0.09375	17.12	-8.508	24.8081	0.12354	-0.15234	-0.17676	NaN	NaN	NaN	NaN	NaN	NaN
0.856	-3.555	115.257	968.784	-1.1433	0.81407	-0.12354	-162.284	-3.487	1561.6348	-2.8511	2.1606	-0.068359	5.363	-0.899000000000001	12.133	0.11523	-0.13965	-0.18262	NaN	NaN	NaN	NaN	NaN	NaN
0.858	-2.606	123.533	939.4536	-1.1215	0.78906	-0.11904	-116.85	-2.053	1584.013582	-2.7175	2.1408	-0.054443	53.327	40.43268	1.574	0.095215	-0.125	-0.18457	NaN	NaN	NaN	NaN	NaN	NaN
0.86	8.294	115.4241	926.4833	-1.1035	0.76367	-0.11621	-155.9212	12.327	1588.403	-2.5698	2.0962	-0.046875	20.87	11.2154	13.64	0.066895	-0.091797	-0.18555	NaN	NaN	NaN	NaN	NaN	NaN
0.862	6.491	114.12	897.3768	-1.0842	0.74219	-0.11289	-211.707	-47.532	1579.2536	-2.3906	2.002	-0.044434	-27.261	15.718	9.182	0.044922	-0.075195	-0.18115	NaN	NaN	NaN	NaN	NaN	NaN
0.864	1.847	129.411	870.3394	-1.0647	0.72041	-0.10947	-150.4438	-37.1573	1577.5968	-2.3159	1.9536	-0.044434	-41.9111	9.15059	7.581	0.0053711	-0.030762	-0.17236	NaN	NaN	NaN	NaN	NaN	NaN
0.866	-4.631	127.852	852.9581	-1.0479	0.70127	-0.10244	-142.077	-10.176	1549.2465	-2.1929	1.8403	-0.036133	-20.892	44.9803	13.9234	-0.025879	0.0051268	-0.16553	NaN	NaN	NaN	NaN	NaN	NaN
0.868	33.972	133.532	847.1179	-1.0332	0.68144	-0.10176	-152.4031	-16.838	1558.869	-2.1199	1.7581	-0.02124	-37.362	28.797	21.722	-0.056152	0.040527	-0.14697	NaN	NaN	NaN	NaN	NaN	NaN
0.87	34.822	134.151	829.786	-1.0137	0.66211	-0.09668	-124.902	21.299	1558.4191	-2.0522	1.6704	-0.014648	-43.076	47.2734	42.169	-0.099121	0.073242	-0.13916	NaN	NaN	NaN	NaN	NaN	NaN
0.872	28.7958	134.813	784.0709	-0.99347	0.64678	-0.095215	-153.899	19.946	1505.177	-1.9629	1.5586	-0.015137	-69.89	29.343	16.1492	-0.12061	0.09082	-0.13281	NaN	NaN	NaN	NaN	NaN	NaN
0.874	35.049	128.7827	754.373	-0.96904	0.62959	-0.092676	-121.805	26.1598	1509.4712	-1.9219	1.502	-0.010742	-78.1483	61.81275	-14.6746	-0.15625	0.11133	-0.12451	NaN	NaN	NaN	NaN	NaN	NaN
0.876	19.353	139.9249	741.5014	-0.94639	0.61318	-0.094629	-123.352	78.799	1499.357	-1.8301	1.4102	-0.018555	-105.28	45.3078	-4.493	-0.1792	0.12427	-0.11792	NaN	NaN	NaN	NaN	NaN	NaN
0.878	35.353	140.8739	725.7788	-0.91875	0.59277	-0.093555	-151.8612	60.4157	1495.0803	-1.7634	1.3493	-0.028809	-71.749	56.9188	54.293	-0.19385	0.13037	-0.11084	NaN	NaN	NaN	NaN	NaN	NaN
0.88	8.031	136.0733	698.7955	-0.89404	0.57666	-0.091309	-97.419	89.605	1508.258	-1.6992	1.2949	-0.037109	-102.239	-8.523	121.3945	-0.20801	0.13672	-0.10889	NaN	NaN	NaN	NaN	NaN	NaN
0.882	-23.931	116.3815	681.72934	-0.86738	0.55058	-0.087207	-135.1649	130.49	1439.038	-1.6265	1.231	-0.052246	-79.1398	23.7363	155.907	-0.2124	0.14404	-0.11279	NaN	NaN	NaN	NaN	NaN	NaN
0.884	-47.395	124.4629	663.2036	-0.84258	0.53086	-0.087891	-125.189	116.081	1421.503	-1.5933	1.1997	-0.057129	-90.9742	34.392	181.532	-0.21094	0.13916	-0.12695	NaN	NaN	NaN	NaN	NaN	NaN
0.886	-51.8883	141.958	638.2183	-0.81523	0.50508	-0.085547	-49.539	126.39	1411.6864	-1.5449	1.1563	-0.073242	-83.2911	82.248	317.0705	-0.20288	0.13818	-0.14112	NaN	NaN	NaN	NaN	NaN	NaN
0.888	-70.0842	152.72	611.5307	-0.79131	0.47724	-0.086132	-100.533	95.525	1380.5	-1.5097	1.1289	-0.083497	-74.1213	45.8087	487.1108	-0.19727	0.13672	-0.15186	NaN	NaN	NaN	NaN	NaN	NaN
0.89	-91.473	141.0045	587.6162	-0.76709	0.45166	-0.09082	-79.044	84.5645	1382.946	-1.48	1.104	-0.077637	-91.437	70.783	671.106	-0.20605	0.14795	-0.15918	NaN	NaN	NaN	NaN	NaN	NaN
0.892	-74.1621	137.5299	543.917	-0.73623	0.42705	-0.087207	-37.062	123.683	1351.562	-1.4453	1.0742	-0.095215	16.5359	46.5063	837.562	-0.23047	0.15332	-0.17188	NaN	NaN	NaN	NaN	NaN	NaN
0.894	-93.872	133.9467	514.4032	-0.71153	0.40381	-0.082032	-63.724	101.285	1323.601	-1.4272	1.061	-0.095215	59.512	33.51	1070.238	-0.30518	0.1665	-0.18799	NaN	NaN	NaN	NaN	NaN	NaN
0.896	-69.3649	133.5548	496.348	-0.68691	0.37295	-0.084375	-17.936	112.894	1319.497	-1.3984	1.041	-0.097168	47.833	-26.668	1310.398	-0.40308	0.18604	-0.20532	NaN	NaN	NaN	NaN	NaN	NaN
0.898	-65.9591	135.179	491.0142	-0.65293	0.34795	-0.083008	-53.948	140.5161	1287.128	-1.3794	1.0259	-0.099121	15.561	-48.191	1496.779	-0.5249	0.21484	-0.21338	NaN	NaN	NaN	NaN	NaN	NaN
0.9	-59.2385	133.667	471.6564	-0.62256	0.32031	-0.07666	-74.638	149.263	1255.4154	-1.3569	1.0161	-0.097168	-10.367	-60.299	1556.548	-0.75781	0.28369	-0.20801	NaN	NaN	NaN	NaN	NaN	NaN
0.902	-65.4633	138.4404	431.8299	-0.58984	0.29609	-0.07959	-33.492	193.803	1254.5075	-1.3389	1.0049	-0.10156	-17.188	-64.213	1623.228	-0.90576	0.33447	-0.2085	NaN	NaN	NaN	NaN	NaN	NaN
0.904	-71.869	128.8035	402.316	-0.55557	0.27519	-0.076172	-96.1715	209.206	1240.689	-1.3213	0.99609	-0.10059	-60.146	-111.441	1647.905	-1.2715	0.44531	-0.21387	NaN	NaN	NaN	NaN	NaN	NaN
0.906	-62.5122	132.204	393.4247	-0.51377	0.25293	-0.076562	-76.3702	168.856	1236.248	-1.3027	0.9834	-0.10449	-90.285	-149.2266	1677.842	-1.5818	0.55981	-0.20678	NaN	NaN	NaN	NaN	NaN	NaN
0.908	-34.467	147.033	375.723	-0.47813	0.22539	-0.075781	-50.197	196.13	1210.111	-1.2788	0.96582	-0.097901	-86.039	-188.649	1612.197	-1.8945	0.69531	-0.17676	NaN	NaN	NaN	NaN	NaN	NaN
0.91	-19.694	145.579	352.034	-0.43799	0.20068	-0.076172	-90.4276	198.3544	1142.1144	-1.2632	0.95361	-0.091309	-116.061	-247.38	1556.411	-2.3296	0.89893	-0.1167	NaN	NaN	NaN	NaN	NaN	NaN
0.912	-24.775	127.544	325.01534	-0.40449	0.18154	-0.078418	-64.646	193.483	1114.131	-1.2412	0.92969	-0.092285	-115.055	-279.73	1475.97	-2.5723	1.0303	-0.096191	NaN	NaN	NaN	NaN	NaN	NaN
0.914	-1.21	111.079	305.5105	-0.36836	0.15381	-0.080859	-79.712	220.6271	1085.527	-1.2261	0.91553	-0.088379	-133.856	-311.76	1426.277	-3.0288	1.3872	-0.083496	NaN	NaN	NaN	NaN	NaN	NaN
0.916	0.904	109.04616	289.8044	-0.33164	0.13076	-0.079687	-109.7928	198.173	1061.4315	-1.2051	0.88477	-0.091309	-103.176	-269.537	1319.309	-3.269	1.6811	-0.05542	NaN	NaN	NaN	NaN	NaN	NaN
0.918	15.211	98.5743	271.0148	-0.29922	0.11093	-0.081738	-61.036	211.217	1038.5282	-1.1826	0.85938	-0.08374	-70.922	-204.8257	1280.869	-3.4199	1.916	-0.052246	NaN	NaN	NaN	NaN	NaN	NaN
0.92	43.967	88.6819	253.52296	-0.26514	0.088379	-0.083496	-80.211	223.301	1006.2379	-1.1616	0.83252	-0.083984	-65.77	-132.398	1268.88	-3.3984	2.0723	-0.17383	NaN	NaN	NaN	NaN	NaN	NaN
0.922	43.378	97.413	245.0172	-0.23623	0.074609	-0.080078	-53.4578	193.7583	1011.589	-1.1304	0.80713	-0.080078	-152.511	-135.603	1281.307	-3.2534	2.0747	-0.25732	NaN	NaN	NaN	NaN	NaN	NaN
0.924	47.4233	99.857	216.3276	-0.21045	0.053906	-0.080664	-73.6137	217.205	981.5679	-1.1172	0.79297	-0.078125	-198.782	-135.025	1276.259	-2.7515	1.9087	-0.37256	NaN	NaN	NaN	NaN	NaN	NaN
0.926	31.124	96.021	198.4948	-0.18467	0.041016	-0.083789	-125.848	215.929	931.8788	-1.0815	0.76514	-0.073242	-206.176	-143.12	1265.322	-2.3249	1.635	-0.46753	NaN	NaN	NaN	NaN	NaN	NaN
0.928	8.702	85.08	187.2926	-0.1623	0.028125	-0.081836	-48.739	209.271	909.53	-1.0515	0.73999	-0.075684	-186.95	-135.455	1240.262	-1.9038	1.3267	-0.5376	NaN	NaN	NaN	NaN	NaN	NaN
0.93	6.348	82.1094	183.322	-0.13477	0.017578	-0.075195	-57.8329	245.7438	882.27041	-1.0234	0.7168	-0.074707	-185.633	-152.671	1259.675	-1.4565	0.98096	-0.60498	NaN	NaN	NaN	NaN	NaN	NaN
0.932	4.999	81.801	188.2084	-0.11299	0.0076172	-0.078711	-34.543	206.452	862.469	-0.97412	0.68408	-0.074219	-147.9207	-210.513	1268.284	-1.2988	0.86133	-0.62891	NaN	NaN	NaN	NaN	NaN	NaN
0.934	-7.619	73.3855	175.751	-0.093262	-0.00087892	-0.07959	-7.778	201.296	844.287	-0.94727	0.66895	-0.072266	-176.71	-255.933	1289.782	-1.0854	0.70654	-0.65967	NaN	NaN	NaN	NaN	NaN	NaN
0.936	-37.248	66.6458	150.0221	-0.069434	-0.0071289	-0.078418	-44.5878	228.492	781.9422	-0.89355	0.63672	-0.068359	-120.137	-316.372	1349.203	-0.98388	0.64746	-0.67578	NaN	NaN	NaN	NaN	NaN	NaN
0.938	-17.627	66.9478	143.92402	-0.044922	-0.013183	-0.079688	11.598	186.2881	734.013	-0.85303	0.60888	-0.073487	-92.334	-359.499	1387.882	-0.87842	0.60791	-0.68506	NaN	NaN	NaN	NaN	NaN	NaN
0.94	-36.3465	64.8957	133.1323	-0.027832	-0.016602	-0.07373	17.808	200.6932	692.421	-0.80664	0.58008	-0.079102	-47.7555	-393.822	1468.9298	-0.72607	0.56689	-0.66553	NaN	NaN	NaN	NaN	NaN	NaN
0.942	-51.546	57.9864	128.5341	-0.0089845	-0.027148	-0.075781	-35.098	181.783	642.3471	-0.73828	0.53711	-0.07959	-1.119	-390.871	1517.6126	-0.64746	0.55176	-0.65234	NaN	NaN	NaN	NaN	NaN	NaN
0.944	-62.391	63.5082	108.6972	0.0088868	-0.025781	-0.074805	20.549	134.831	624.78398	-0.70361	0.52393	-0.077148	10.336	-368.119	1555.9398	-0.51123	0.52881	-0.58984	NaN	NaN	NaN	NaN	NaN	NaN
0.946	-66.9763	43.474	91.198	0.018262	-0.039843	-0.068164	3.47600000000001	181.9951	567.145	-0.63916	0.48096	-0.083008	29.864	-307.446	1563.1409	-0.44873	0.53076	-0.54297	NaN	NaN	NaN	NaN	NaN	NaN
0.948	-77.6069	42.5188	95.529	0.033886	-0.050293	-0.069141	-5.954	170.19182	546.2018	-0.58472	0.44653	-0.088379	53.025	-272.202	1602.635	-0.43555	0.53369	-0.49365	NaN	NaN	NaN	NaN	NaN	NaN
0.95	-73.67903	32.423	105.14281	0.042969	-0.05957	-0.068848	23.523	192.473	525.9147	-0.52881	0.41357	-0.094238	71.797	-224.721	1625.821	-0.50146	0.57764	-0.42725	NaN	NaN	NaN	NaN	NaN	NaN
0.952	-80.2837	43.1997	105.5372	0.053614	-0.066797	-0.069434	-40.7139	226.061	479.8127	-0.45459	0.36377	-0.10205	83.92	-181.533	1653.851	-0.58252	0.61084	-0.40186	NaN	NaN	NaN	NaN	NaN	NaN
0.954	-66.8716	63.7006	87.8627	0.058594	-0.074219	-0.066211	-0.0659999999999954	167.909	442.7136	-0.42139	0.34473	-0.10352	90.048	-137.827	1637.8216	-0.79688	0.69336	-0.37109	NaN	NaN	NaN	NaN	NaN	NaN
0.956	-92.789	63.6825	79.59123	0.066016	-0.083984	-0.066211	16.573	182.974	405.106	-0.34961	0.29883	-0.10645	102.173	-120.689	1662.81	-0.97045	0.76294	-0.36669	NaN	NaN	NaN	NaN	NaN	NaN
0.958	-83.226	58.1293	70.9203	0.067578	-0.086328	-0.065234	-33.093	167.49	366.873	-0.30029	0.26221	-0.10889	127.424	-92.595	1708.8424	-1.1431	0.84521	-0.3623	NaN	NaN	NaN	NaN	NaN	NaN
0.96	-59.126	49.8931	92.9031	0.071289	-0.095703	-0.062988	1.688	105.789	360.1647	-0.25391	0.23145	-0.11035	136.744	-87.292	1756.484	-1.3516	0.96484	-0.37988	NaN	NaN	NaN	NaN	NaN	NaN
0.962	-37.439	55.605	64.9905	0.069824	-0.099511	-0.060937	-25.875	147.755	304.204	-0.19629	0.19189	-0.11523	121.131	-72.802	1721.759	-1.4453	1.0293	-0.40283	NaN	NaN	NaN	NaN	NaN	NaN
0.964	-34.758	44.229	58.0624	0.064258	-0.1001	-0.057129	-43.8936	114.686	259.6505	-0.16992	0.16895	-0.1123	96.627	-105.061	1724.2587	-1.6304	1.1626	-0.47021	NaN	NaN	NaN	NaN	NaN	NaN
0.966	-12.985	32.9988	44.7296	0.055664	-0.10596	-0.055176	-32.25	124.647	237.5933	-0.12354	0.13379	-0.11182	99.03	-116.459	1766.0261	-1.832	1.291	-0.54492	NaN	NaN	NaN	NaN	NaN	NaN
0.968	-10.661	32.1768	41.9484	0.047265	-0.11074	-0.051075	-50.4001	166.264	213.22	-0.096924	0.11132	-0.11767	47.082	-148.7	1841.398	-1.9453	1.3516	-0.56445	NaN	NaN	NaN	NaN	NaN	NaN
0.97	3.272	42.1276	42.3067	0.036621	-0.10742	-0.04248	-58.0607	114.028	219.32462	-0.069824	0.09375	-0.11719	41.414	-149.611	1869.591	-2.23	1.4985	-0.60107	NaN	NaN	NaN	NaN	NaN	NaN
0.972	12.202	39.96412	29.9808	0.025684	-0.1042	-0.043164	-59.6935	143.393	188.447	-0.043945	0.068359	-0.12207	21.8358	-161.722	1878.824	-2.4566	1.6314	-0.61866	NaN	NaN	NaN	NaN	NaN	NaN
0.974	8.272	29.31712	40.6022	0.012402	-0.10097	-0.037403	-74.222	126.4302	175.455	-0.032227	0.05957	-0.12354	2.16353	-162.949	1877.465	-2.6655	1.7739	-0.62939	NaN	NaN	NaN	NaN	NaN	NaN
0.976	23.278	37.5825	47.8216	-9.764e-05	-0.099024	-0.036231	-36.871	49.835	181.0027	-0.01123	0.041016	-0.12158	-29.8751	-174.259	1901.837	-2.8789	1.9414	-0.63867	NaN	NaN	NaN	NaN	NaN	NaN
0.978	9.532	37.877	41.8086	-0.0092773	-0.086718	-0.030762	-75.2555	108.8204	147.2274	0.0024415	0.031495	-0.12182	-35.9809	-120.501	1870.525	-2.9351	1.9985	-0.64111	NaN	NaN	NaN	NaN	NaN	NaN
0.98	1.994	38.978	37.9288	-0.018066	-0.077637	-0.02832	-55.2284	85.0387	120.096	0.013672	0.020508	-0.12305	-28.407926	-81.757	1845.2814	-2.9429	2.0435	-0.65771	NaN	NaN	NaN	NaN	NaN	NaN
0.982	-2.075	31.94	32.4172	-0.025	-0.070898	-0.024414	6.826	88.983	105.9303	0.027832	0.010742	-0.12256	25.031	-28.329	1786.475	-2.8718	2.0012	-0.67749	NaN	NaN	NaN	NaN	NaN	NaN
0.984	11.853	34.1779	32.9947	-0.031641	-0.064551	-0.023145	-53.7047	152.551	85.0676	0.035889	0.003418	-0.12671	-37.293	-25.0679	1778.869	-2.7632	1.9341	-0.68994	NaN	NaN	NaN	NaN	NaN	NaN
0.986	-11.08	33.0502	34.3161	-0.035547	-0.061425	-0.021191	-18.027	78.5376	95.521	0.046875	-0.0053711	-0.12842	-56.37	24.058	1752.821	-2.6284	1.8677	-0.68896	NaN	NaN	NaN	NaN	NaN	NaN
0.988	-27.788	25.82155	31.3062	-0.037891	-0.060352	-0.017774	-20.614	96.387	85.15455	0.058594	-0.016602	-0.13525	-60.109	42.67	1748.356	-2.5918	1.8594	-0.68457	NaN	NaN	NaN	NaN	NaN	NaN
0.99	-25.445	25.5757	24.6313	-0.04248	-0.061523	-0.017578	-26.167	83.5931	61.826	0.066406	-0.026367	-0.14111	-12.0495	91.3515	1713.105	-2.5938	1.8965	-0.68457	NaN	NaN	NaN	NaN	NaN	NaN
0.992	-23.069	32.2773	25.7124	-0.044238	-0.057519	-0.01582	29.068	31.1289	68.2911	0.075195	-0.03125	-0.13965	-16.2627	83.029	1722.034	-2.5909	1.9385	-0.66602	NaN	NaN	NaN	NaN	NaN	NaN
0.994	-44.107	38.1051	24.869	-0.046192	-0.059668	-0.017773	-14.411	81.123	46.889	0.081787	-0.040772	-0.14429	-1.3379	116.803	1716.428	-2.5547	1.957	-0.62305	NaN	NaN	NaN	NaN	NaN	NaN
0.996	-55.463	25.23095	32.7909	-0.048535	-0.057324	-0.013476	-5.681	32.2396	56.252	0.084473	-0.053223	-0.14502	3.46	113.115	1718.463	-2.4395	1.8848	-0.59766	NaN	NaN	NaN	NaN	NaN	NaN
0.998	-54.2741	31.7068	39.911	-0.050781	-0.055957	-0.011914	21.824	30.618	49.522	0.094238	-0.067871	-0.14844	21.489	156.127	1664.067	-2.3647	1.8169	-0.59717	NaN	NaN	NaN	NaN	NaN	NaN
1	-72.6812	30.4947	31.1699	-0.047852	-0.054199	-0.017578	-22.678	81.336	28.1318	0.095703	-0.072266	-0.15137	7.6711	135.158	1674.66	-2.2085	1.6548	-0.60059	NaN	NaN	NaN	NaN	NaN	NaN
1.002	-93.249	20.6477	40.9296	-0.044531	-0.054395	-0.016113	13.715	10.1673	54.666	0.092285	-0.087402	-0.14893	42.6374	136.5519	1688.3197	-2.1108	1.5366	-0.60694	NaN	NaN	NaN	NaN	NaN	NaN
1.004	-86.512	12.7924	41.039	-0.037305	-0.0542	-0.01914	14.428	51.115	50.0891	0.089355	-0.093018	-0.14892	56.899	89.7773	1717.383	-2.0288	1.4331	-0.61475	NaN	NaN	NaN	NaN	NaN	NaN
1.006	-80.0247	13.8338	42.0252	-0.03457	-0.05498	-0.022656	-14.447	53.2098	41.2967	0.081543	-0.098145	-0.14893	104.592	130.746	1698.621	-1.9492	1.3359	-0.61572	NaN	NaN	NaN	NaN	NaN	NaN
1.008	-77.0005	41.198	21.582	-0.027051	-0.055078	-0.028516	23.842	-7.5071	43.07348	0.069824	-0.10547	-0.14063	86.502	112.9314	1687.732	-1.9194	1.3013	-0.60645	NaN	NaN	NaN	NaN	NaN	NaN
1.01	-79.4145	36.2467	29.648	-0.020508	-0.056641	-0.028809	-26.907	42.9334	23.375	0.062012	-0.10498	-0.14014	96.828	158.225	1671.024	-1.8848	1.2695	-0.5918	NaN	NaN	NaN	NaN	NaN	NaN
1.012	-59.2576	25.42	22.593	-0.016797	-0.055859	-0.035547	-27.798	-10.5584	28.867	0.049316	-0.10547	-0.12695	79.961	128.47605	1659.78	-1.8686	1.2622	-0.58252	NaN	NaN	NaN	NaN	NaN	NaN
1.014	-44.112	29.6615	34.6785	-0.015039	-0.057226	-0.04082	1.821	-6.8698	40.6828	0.031495	-0.10351	-0.11206	62.263	196.7962	1612.167	-1.8535	1.2617	-0.57422	NaN	NaN	NaN	NaN	NaN	NaN
1.016	-48.24	41.7003	34.1145	-0.013477	-0.058008	-0.050586	-56.91512	55.6963	23.8535	0.019531	-0.099609	-0.098633	41.9676	184.477	1560.168	-1.8159	1.2544	-0.56592	NaN	NaN	NaN	NaN	NaN	NaN
1.018	-41.402	30.153	30.1604	-0.012402	-0.054785	-0.05459	-40.424	-11.3933	36.184	-0.0014648	-0.089844	-0.08252	38.9	222.047	1517.916	-1.7866	1.2446	-0.55225	NaN	NaN	NaN	NaN	NaN	NaN
1.02	-9.445	28.264	45.4538	-0.0078125	-0.052246	-0.057129	-39.126	45.334	34.4236	-0.013184	-0.086914	-0.075684	2.316	199.094	1495.557	-1.7207	1.2148	-0.53955	NaN	NaN	NaN	NaN	NaN	NaN
1.022	-1.441	24.969	53.5412	-0.0053711	-0.047949	-0.069141	-69.3767	39.5594	33.5032	-0.030762	-0.081055	-0.061523	-23.879	268.694	1443.532	-1.6582	1.1919	-0.52246	NaN	NaN	NaN	NaN	NaN	NaN
1.024	-9.26	22.754	61.33845	-0.0025391	-0.037012	-0.067285	-44.362	-18.8707	56.4474	-0.035401	-0.077881	-0.049072	-39.914	249.698	1409.289	-1.5952	1.1646	-0.50049	NaN	NaN	NaN	NaN	NaN	NaN
1.026	-7.177	0.7993	85.75	0.0017578	-0.026856	-0.07627	-72.1657	42.5084	21.107	-0.038574	-0.077637	-0.039063	-58.5754	285.6844	1350.688	-1.5112	1.1196	-0.47607	NaN	NaN	NaN	NaN	NaN	NaN
1.028	4.047	-3.4764	122.107	0.0026367	-0.019922	-0.079492	-57.5322	-18.0136	28.1634	-0.033691	-0.075195	-0.023926	-121.145	217.8223	1321.265	-1.4785	1.1016	-0.46094	NaN	NaN	NaN	NaN	NaN	NaN
1.03	24.817	23.3219	144.0332	0.003418	-0.012207	-0.085449	-47.738	-9.8451	34.4299	-0.03418	-0.072266	-0.018066	-93.2147	254.086	1306.481	-1.4023	1.0537	-0.43457	NaN	NaN	NaN	NaN	NaN	NaN
1.032	25.154	46.688	200.6972	0.0049805	-0.0058594	-0.091114	-80.9503	46.1615	11.52	-0.02832	-0.078613	-0.0039063	-109.4442	222.2584	1255.1567	-1.3437	1.0205	-0.41162	NaN	NaN	NaN	NaN	NaN	NaN
1.034	56.141	26.3776	255.464	0.0097657	-0.0030274	-0.096387	-36.608	-17.4422	22.199098	-0.014649	-0.085205	0.00024415	-112.2957	283.071	1187.143	-1.2866	0.99072	-0.39355	NaN	NaN	NaN	NaN	NaN	NaN
1.036	80.443	26.02	326.888	0.0066407	0.0012695	-0.10107	-35.962	30.2094	10.9403	-0.0083008	-0.09375	0.0078125	-133.645	224.592	1101.667	-1.209	0.95117	-0.36426	NaN	NaN	NaN	NaN	NaN	NaN
1.038	96.785	23.6152	396.6303	0.0086914	0.00087889	-0.11055	-61.0259	35.344	10.6913	0.0073242	-0.10107	0.015137	-161.795	231.076	1071.195	-1.1738	0.93359	-0.34717	NaN	NaN	NaN	NaN	NaN	NaN
1.04	70.7007	22.0585	508.06709	0.003418	0.0039063	-0.11963	-23.025	-13.2557	41.67522	0.013672	-0.10889	0.012695	-178.752	181.081	1039.3449	-1.0913	0.89697	-0.31885	NaN	NaN	NaN	NaN	NaN	NaN
1.042	61.122	8.3809	626.3174	-9.764e-05	0.005957	-0.13467	-33.372	57.122	17.251	0.027344	-0.12256	0.019531	-157.896	231.741	1002.7692	-1.0314	0.85766	-0.29785	NaN	NaN	NaN	NaN	NaN	NaN
1.044	50.669	17.4325	687.8996	-0.012695	0.0075195	-0.14385	-7.258	0.6061	12.5972	0.036866	-0.12915	0.023682	-123.986	212.691	946.5523	-0.96484	0.81543	-0.27148	NaN	NaN	NaN	NaN	NaN	NaN
1.046	9.572	12.7336	750.028	-0.03418	0.016113	-0.15244	-9.412	-5.2435	15.5481	0.043945	-0.13867	0.023438	-108.9814	254.7052	914.1943	-0.88184	0.75195	-0.23926	NaN	NaN	NaN	NaN	NaN	NaN
1.048	-36.296	-4.839	828.921	-0.076172	0.026367	-0.16152	-22.24	45.406	4.2862	0.057129	-0.14746	0.020996	-132.09	223.086	843.66847	-0.83496	0.71875	-0.22559	NaN	NaN	NaN	NaN	NaN	NaN
1.05	-77.005	-43.9647	914.299	-0.13086	0.035645	-0.17285	5.318	-8.8824	9.19657	0.065918	-0.15625	0.019043	-121.3435	290.3077	775.485	-0.75586	0.65625	-0.19336	NaN	NaN	NaN	NaN	NaN	NaN
1.052	-105.77	-60.6443	984.915	-0.20244	0.054101	-0.18574	8.672	55.031	0.604000000000001	0.073242	-0.16309	0.015625	-84.64	262.292	707.628	-0.69971	0.60498	-0.17089	NaN	NaN	NaN	NaN	NaN	NaN
1.054	-128.973	-37.8055	1029.834	-0.29336	0.069922	-0.19717	-19.013	59.493	2.6722	0.076172	-0.16821	0.0095214	-53.925	297.915	677.136	-0.64941	0.55566	-0.15039	NaN	NaN	NaN	NaN	NaN	NaN
1.056	-156.348	-33.2972	1063.235	-0.39961	0.097654	-0.20772	16.968	-2.0665	27.8958	0.082031	-0.17578	0.0058594	-20.619	249.115	641.13	-0.58496	0.49902	-0.1167	NaN	NaN	NaN	NaN	NaN	NaN
1.058	-161.1768	-46.446	1078.3244	-0.53125	0.13857	-0.22002	-6.333	61.593	25.9238	0.081543	-0.1792	-0.0048828	-30.486	294.526	600.658	-0.55371	0.47217	-0.10645	NaN	NaN	NaN	NaN	NaN	NaN
1.06	-169.9788	-75.076	1085.968	-0.68311	0.19629	-0.23145	-0.556000000000001	9.6228	9.716	0.078125	-0.18262	-0.010254	-5.212	272.068	539.195	-0.48779	0.41846	-0.07666	NaN	NaN	NaN	NaN	NaN	NaN
1.062	-147.854	-81.026	1109.746	-0.85674	0.27266	-0.23721	14.685	13.3008	32.0735	0.078125	-0.18213	-0.016602	-21.348	283.527	517.04578	-0.43359	0.37549	-0.061036	NaN	NaN	NaN	NaN	NaN	NaN
1.064	-139.2935	-81.78	1138.024	-1.0523	0.36592	-0.23017	-34.43	59.985	14.6902	0.076905	-0.17896	-0.029052	-14.923	234.937	469.701	-0.38086	0.32715	-0.043457	NaN	NaN	NaN	NaN	NaN	NaN
1.066	-144.1239	-61.1632	1152.726	-1.2788	0.48232	-0.21142	-15.504	0.63197	25.047	0.077148	-0.17529	-0.034668	-14.341	247.279	470.615	-0.30322	0.27393	-0.019531	NaN	NaN	NaN	NaN	NaN	NaN
1.068	-172.878	-39.186	1138.801	-1.5235	0.61494	-0.18857	-1.95200000000001	52.409	19.25887	0.073242	-0.16699	-0.04248	35.907	222.674	404.7653	-0.26807	0.24658	-0.013184	NaN	NaN	NaN	NaN	NaN	NaN
1.07	-171.1571	-26.623	1091.2212	-1.7871	0.76367	-0.16797	-47.2055	56.526	6.1743	0.072266	-0.16553	-0.047363	25.162	262.696	380.696	-0.19385	0.18115	0.010742	NaN	NaN	NaN	NaN	NaN	NaN
1.072	-160	-43.083	1055.453	-2.048	0.9418	-0.15185	-41.9041	3.74467	33.426	0.066895	-0.15479	-0.059082	7.297	219.818	358.64	-0.14258	0.14282	0.026612	NaN	NaN	NaN	NaN	NaN	NaN
1.074	-160.69	-49.477	1063.524	-2.2883	1.1261	-0.14649	-55.9312	65.339	43.8129	0.064942	-0.14819	-0.069092	-9.003	200.0307	349.074	-0.092773	0.1001	0.040527	NaN	NaN	NaN	NaN	NaN	NaN
1.076	-168.6121	-66.3612	1067.9877	-2.4883	1.3133	-0.15625	-47.7239	22.77	38.5813	0.063477	-0.14355	-0.074707	-4.04600000000001	160.491	287.725	-0.036621	0.049805	0.061523	NaN	NaN	NaN	NaN	NaN	NaN
1.078	-153.6426	-84.2316	1078.7724	-2.6141	1.5041	-0.1708	-44.012	18.5949	37.31918	0.057129	-0.12988	-0.09082	-12.75	170.5152	254.295	-0.013672	0.027344	0.073242	NaN	NaN	NaN	NaN	NaN	NaN
1.08	-139.5683	-110.0336	1072.55929	-2.6362	1.6821	-0.1499	-69.618	60.0566	27.5243	0.057129	-0.12207	-0.093262	-28.317	162.986	212.445	0.023926	-0.0087891	0.087891	NaN	NaN	NaN	NaN	NaN	NaN
1.082	-105.3982	-120.4279	1064.45578	-2.5661	1.7928	-0.14384	-57.43643	-5.196	38.808	0.047852	-0.10596	-0.10498	-63.835	152.20996	217.335	0.046143	-0.033692	0.10645	NaN	NaN	NaN	NaN	NaN	NaN
1.084	-57.875	-129.01373	1062.2447	-2.4336	1.7961	-0.1791	-48.09	42.899	46.596	0.043213	-0.095215	-0.11133	-65.554	138.8639	182.687	0.054688	-0.04834	0.11768	NaN	NaN	NaN	NaN	NaN	NaN
1.086	-44.274	-129.0223	1069.996	-2.2273	1.6813	-0.25059	-66.3379	39.8969	53.6935	0.036133	-0.080078	-0.11426	-100.2458	127.19619	141.8482	0.06543	-0.061523	0.12402	NaN	NaN	NaN	NaN	NaN	NaN
1.088	-11.433	-150.1203	1079.602	-1.9656	1.4844	-0.31377	-35.213	-52.01906	90.2867	0.025879	-0.062012	-0.12256	-112.79	123.49	99.1156	0.062012	-0.063477	0.13135	NaN	NaN	NaN	NaN	NaN	NaN
1.09	12.956	-160.58913	1101.368	-1.689	1.2407	-0.35498	-66.1385	-9.255	100.8691	0.018066	-0.061035	-0.12598	-108.841	92.4016	109.096	0.053711	-0.0625	0.14258	NaN	NaN	NaN	NaN	NaN	NaN
1.092	13.596	-177.9661	1124.6073	-1.4791	1.0215	-0.35733	-19.255	-63.405	124.4232	-0.0014648	-0.037109	-0.13428	-98.9092	94.2962	88.719	0.035889	-0.062012	0.14624	NaN	NaN	NaN	NaN	NaN	NaN
1.094	23.491	-173.025	1129.785	-1.3328	0.86055	-0.35312	11.626	-65.976	171.975	-0.016358	-0.025147	-0.14233	-120.986	69.744	76.831	0.01123	-0.052734	0.15234	NaN	NaN	NaN	NaN	NaN	NaN
1.096	43.859	-172.244	1118.914	-1.252	0.76016	-0.34375	-15.2222	-6.1311	208.687	-0.036133	-0.0097656	-0.14404	-97.9591	60.7362	40.9243	-0.024902	-0.036621	0.15479	NaN	NaN	NaN	NaN	NaN	NaN
1.098	34.411	-173.064	1124.333	-1.1979	0.72705	-0.35547	10.3456	-47.677	322.094	-0.083984	0.020996	-0.14307	-104.392	6.383	39.1592	-0.049805	-0.025879	0.1582	NaN	NaN	NaN	NaN	NaN	NaN
1.1	11.205	-139.5487	1128.087	-1.144	0.71143	-0.37012	20.8979	36.8223	427.868	-0.10303	0.033203	-0.1416	-87.7975	0.972000000000001	28.5415	-0.095703	-0.0043945	0.16406	NaN	NaN	NaN	NaN	NaN	NaN
1.102	26.9532	-116.789	1160.2527	-1.0673	0.70342	-0.3833	43.04	65.7633	579.192	-0.17725	0.063477	-0.15137	-79.5513	-30.1992	19.1747	-0.12866	0.015381	0.17114	NaN	NaN	NaN	NaN	NaN	NaN
1.104	31.2156	-115.432	1187.2339	-0.97383	0.68828	-0.3919	77.21	1.4755	735.612	-0.24219	0.089598	-0.15699	-30.862	28.739	-5.936	-0.1626	0.036133	0.17725	NaN	NaN	NaN	NaN	NaN	NaN
1.106	34.0227	-122.574	1230.2668	-0.87188	0.66367	-0.39775	70.554	29.582	833.617	-0.31934	0.12109	-0.16797	-24.659	-2.431	16.657	-0.20801	0.0625	0.18408	NaN	NaN	NaN	NaN	NaN	NaN
1.108	31.3546	-130.832	1253.5999	-0.77392	0.61884	-0.40303	68.673	-32.5501	933.4777	-0.43506	0.17529	-0.18311	-17.057	24.096	33.147	-0.22803	0.07666	0.1792	NaN	NaN	NaN	NaN	NaN	NaN
1.11	19.4161	-131.312	1271.6389	-0.68848	0.55762	-0.40625	72.455	-42.389	1036.986	-0.50879	0.20459	-0.1875	-26.489	-25.722	27.571	-0.26611	0.10059	0.17822	NaN	NaN	NaN	NaN	NaN	NaN
1.112	14.875	-127.5938	1258.85	-0.61631	0.49678	-0.40342	6.497	12.393	1090.013	-0.67871	0.28711	-0.18408	-6.579	26.3549	20.4093	-0.29053	0.12256	0.17651	NaN	NaN	NaN	NaN	NaN	NaN
1.114	9.8821	-128.512	1282.555	-0.55537	0.42744	-0.40528	-15.573	-47.214	1110.147	-0.83106	0.36841	-0.177	13.206	-0.5994	40.3657	-0.3208	0.14014	0.17285	NaN	NaN	NaN	NaN	NaN	NaN
1.116	-2.63	-133.51	1301.21	-0.51045	0.3583	-0.41113	-11.293	-35.32	1124.84	-1.0112	0.45557	-0.16211	30.756	51.18	43.394	-0.35352	0.16016	0.16406	NaN	NaN	NaN	NaN	NaN	NaN
1.118	-39.2141	-141.763	1309.36	-0.48457	0.28682	-0.42383	-69.62	-57.267	1096.1118	-1.2969	0.60352	-0.13574	31.027	8.7063	53.274	-0.37451	0.1753	0.16333	NaN	NaN	NaN	NaN	NaN	NaN
1.12	-25.372	-157.933	1346.275	-0.47119	0.21729	-0.44189	-98.336	-114.785	1140.311	-1.4556	0.68799	-0.12451	27.074	69.494	17.1965	-0.39844	0.18359	0.15918	NaN	NaN	NaN	NaN	NaN	NaN
1.122	-26.96737	-154.9785	1345.3173	-0.48369	0.17285	-0.44698	-114.81	-79.081	1158.095	-1.8086	0.86523	-0.10254	29.42	25.9511	-24.8167	-0.42578	0.19775	0.15479	NaN	NaN	NaN	NaN	NaN	NaN
1.124	-46.646	-135.89532	1346.1433	-0.5169	0.14404	-0.43897	-115.639	-155.143	1141.868	-2.1602	1.0635	-0.07959	20.631	79.248	-1.852	-0.44287	0.19873	0.15527	NaN	NaN	NaN	NaN	NaN	NaN
1.126	-35.252	-131.8717	1353.94279	-0.58604	0.146	-0.421	-106.943	-191.763	1111.166	-2.3203	1.1768	-0.070801	22.027	31.0971	26.7963	-0.46191	0.21045	0.15674	NaN	NaN	NaN	NaN	NaN	NaN
1.128	-30.8893	-130.0202	1358.8768	-0.7003	0.18526	-0.39717	-125.1765	-111.2295	1055.04794	-2.6011	1.4243	-0.025391	16.518	89.254	12.312	-0.46607	0.21265	0.16259	NaN	NaN	NaN	NaN	NaN	NaN
1.13	-24.8359	-129.2774	1376.6163	-0.84766	0.26709	-0.36768	-122.4947	-107.345	1066.2514	-2.77	1.6235	-0.010986	19.402	43.221	16.6747	-0.46924	0.20752	0.16309	NaN	NaN	NaN	NaN	NaN	NaN
1.132	-27.1585	-121.96924	1383.49127	-1.0193	0.37694	-0.34678	-133.9667	-9.735	1086.5876	-2.8823	1.7974	-0.0097656	-13.942	80.246	14.4218	-0.44775	0.1958	0.16846	NaN	NaN	NaN	NaN	NaN	NaN
1.134	-4.6964	-112.0757	1377.76533	-1.1932	0.50632	-0.33516	-181.508	0.875999999999991	1064.65	-2.8901	1.9263	-0.049316	-51.0959	21.5976	48.836	-0.4292	0.18799	0.17188	NaN	NaN	NaN	NaN	NaN	NaN
1.136	21.2056	-78.3047	1385.2885	-1.3647	0.65123	-0.33555	-152.59	-84.436	1071.2138	-2.832	1.9336	-0.081055	-77.2908	60.2	64.298	-0.37549	0.1582	0.17627	NaN	NaN	NaN	NaN	NaN	NaN
1.138	23.996	-51.9836	1378.325	-1.5267	0.80465	-0.35956	-163.499	-104.775	1080.814	-2.5732	1.8184	-0.17578	-64.9936	12.4295	52.27	-0.32593	0.13061	0.18139	NaN	NaN	NaN	NaN	NaN	NaN
1.14	-9.2347	-47.153	1385.53216	-1.6797	0.96289	-0.38818	-169.914	-174.3097	1094.339	-2.2841	1.666	-0.23438	-79.8915	65.231	45.6859	-0.25635	0.09375	0.18311	NaN	NaN	NaN	NaN	NaN	NaN
1.142	19.249	-56.6312	1364.41	-1.8213	1.119	-0.4129	-133.9909	-214.143	1108.597	-1.9937	1.4751	-0.28711	-89.472	12.783	58.9075	-0.16504	0.035156	0.19092	NaN	NaN	NaN	NaN	NaN	NaN
1.144	48.699	-66.2841	1388.821	-1.9523	1.265	-0.42021	-139.763	-201.468	1104.894	-1.6733	1.2417	-0.3335	-101.4473	36.8244	46.5903	-0.11475	0.0073242	0.19482	NaN	NaN	NaN	NaN	NaN	NaN
1.146	67.721	-55.2958	1399.6881	-2.0746	1.3991	-0.41749	-107.5	-269.198	1117.195	-1.5581	1.1411	-0.3584	-88.318	-0.0799999999999983	31.7014	-0.021484	-0.049316	0.20264	NaN	NaN	NaN	NaN	NaN	NaN
1.148	57.74	-65.004	1423.9449	-2.1871	1.5155	-0.40644	-71.64762	-241.9321	1137.358	-1.3809	0.97852	-0.37598	-111.5096	42.8589	32.25	0.052246	-0.089601	0.20264	NaN	NaN	NaN	NaN	NaN	NaN
1.15	62.945	-63.855	1430.03518	-2.2827	1.6079	-0.40771	-43.6999	-252.811	1173.967	-1.2857	0.89453	-0.39966	-94.252	-16.285	41.322	0.11523	-0.12793	0.20508	NaN	NaN	NaN	NaN	NaN	NaN
1.152	64.565	-64.834	1441.2772	-2.3382	1.6476	-0.41931	15.559	-295.735	1276.803	-1.1909	0.82764	-0.4292	-97.1517	9.038	68.596	0.19092	-0.1792	0.20947	NaN	NaN	NaN	NaN	NaN	NaN
1.154	54.479	-57.7205	1425.5742	-2.3527	1.6299	-0.43394	-2.722	-233.865	1362.5771	-1.0552	0.74854	-0.4502	-67.69819	-8.498	54.767	0.22754	-0.19678	0.21387	NaN	NaN	NaN	NaN	NaN	NaN
1.156	61.447	-42.7785	1433.094	-2.3352	1.5804	-0.45032	19.056	-231.141	1387.787	-0.97852	0.71289	-0.4502	-78.1241	39.5076	45.3082	0.2876	-0.23096	0.21777	NaN	NaN	NaN	NaN	NaN	NaN
1.158	68.279	-42.2773	1437.7532	-2.3107	1.5325	-0.47803	49.6292	-226.958	1395.515	-0.82861	0.64111	-0.44287	-56.078	30.6238	28.97486	0.32373	-0.25757	0.21948	NaN	NaN	NaN	NaN	NaN	NaN
1.16	43.876	-37.39313	1429.6275	-2.2832	1.5059	-0.50391	38.234	-181.479	1396.7932	-0.72338	0.57666	-0.44654	-59.808	36.49844	32.9026	0.35791	-0.27881	0.21924	NaN	NaN	NaN	NaN	NaN	NaN
1.162	22.4	-37.7599	1425.9816	-2.2595	1.4997	-0.52139	64.7155	-204.191	1412.37	-0.63281	0.51367	-0.44727	-35.972	11.9968	40.4985	0.39697	-0.30127	0.22021	NaN	NaN	NaN	NaN	NaN	NaN
1.164	7.444	-35.6278	1404.7075	-2.2246	1.4979	-0.51733	67.0209	-152.073	1443.228	-0.53516	0.43555	-0.45898	-16.555	15.45083	37.5751	0.40771	-0.30908	0.21826	NaN	NaN	NaN	NaN	NaN	NaN
1.166	6.202	-25.351	1394.6155	-2.1681	1.5056	-0.50037	51.0798	-119.861	1468.4803	-0.49902	0.40186	-0.46631	22.571	0.4724	19.1204	0.41553	-0.3208	0.21436	NaN	NaN	NaN	NaN	NaN	NaN
1.168	3.159	-6.7642	1394.0245	-2.0865	1.4775	-0.49773	98.418	-154.589	1503.898	-0.45361	0.34229	-0.46289	20.934	-9.9281	46.9116	0.41333	-0.31812	0.21337	NaN	NaN	NaN	NaN	NaN	NaN
1.17	-24.651	3.128	1382.5022	-1.9863	1.4082	-0.50195	72.805	-148.053	1518.805	-0.46485	0.31811	-0.44604	30.15	-20.8621	32.711	0.40283	-0.31836	0.20996	NaN	NaN	NaN	NaN	NaN	NaN
1.172	-23.272	13.6852	1373.718	-1.8825	1.3281	-0.49953	39.1891	-188.737	1516.957	-0.51074	0.31836	-0.41406	14.928	-13.09147	18.9836	0.37207	-0.29785	0.21191	NaN	NaN	NaN	NaN	NaN	NaN
1.174	-31.8339	20.6816	1373.79222	-1.7861	1.2496	-0.49745	55.5958	-207.402	1544.767	-0.66992	0.38721	-0.36523	20.105	25.925	-9.2602	0.35254	-0.28418	0.21436	NaN	NaN	NaN	NaN	NaN	NaN
1.176	-45.1347	28.1734	1369.52	-1.718	1.1755	-0.50208	30.389	-178.6209	1569.94	-0.78369	0.44287	-0.34229	26.071	20.5608	7.581	0.3125	-0.25195	0.21484	NaN	NaN	NaN	NaN	NaN	NaN
1.178	-71.689	24.8325	1353.232	-1.6715	1.1049	-0.50018	-6.012	-209.149	1590.048	-1.0557	0.58398	-0.31689	39.61	35.7937	15.5064	0.27735	-0.22461	0.22217	NaN	NaN	NaN	NaN	NaN	NaN
1.18	-63.26976	12.7127	1323.95379	-1.644	1.0474	-0.48682	-20.6271	-187.2858	1633.637	-1.2559	0.70215	-0.31079	19.47	15.84	30.5232	0.24756	-0.19287	0.22021	NaN	NaN	NaN	NaN	NaN	NaN
1.182	-57.3863	21.0911	1307.644	-1.6404	1.0111	-0.47356	-41.947	-170.416	1635.69	-1.4448	0.82666	-0.31787	-1.566	55.76	2.767	0.20557	-0.15039	0.21924	NaN	NaN	NaN	NaN	NaN	NaN
1.184	-72.226	35.8977	1289.5396	-1.6413	0.99555	-0.46446	-33.268	-203.118	1655.422	-1.6855	1.0078	-0.36377	-15.105	37.126	14.391	0.18848	-0.12842	0.21973	NaN	NaN	NaN	NaN	NaN	NaN
1.186	-69.8367	27.797	1287.4344	-1.6384	0.98959	-0.45407	-63.405	-137.609	1667.401	-1.7891	1.1016	-0.39746	-18.854	52.141	20.3182	0.16504	-0.09668	0.2207	NaN	NaN	NaN	NaN	NaN	NaN
1.188	-56.6518	25.135	1262.1821	-1.6317	0.99434	-0.44633	-93.874	-134.014	1651.4511	-1.9937	1.3091	-0.43506	-41.779	28.217	35.1372	0.15332	-0.075195	0.2185	NaN	NaN	NaN	NaN	NaN	NaN
1.19	-54.5928	28.831	1249.61	-1.6128	0.99072	-0.43701	-60.5339	-140.349	1638.3432	-2.1513	1.4551	-0.43555	-40.721	73.631	20.5455	0.15039	-0.062012	0.20557	NaN	NaN	NaN	NaN	NaN	NaN
1.192	-30.906	45.572	1219.43635	-1.5831	0.99885	-0.42755	-65.885	-87.2418	1610.199	-2.3237	1.5923	-0.43408	-59.243	57.826	1.384	0.14844	-0.05127	0.20703	NaN	NaN	NaN	NaN	NaN	NaN
1.194	-38.17	57.61842	1220.4238	-1.5536	1.0024	-0.42159	-55.162	-124.137	1590.829	-2.5645	1.7617	-0.41602	-73.5515	97.551	-0.628999999999998	0.14746	-0.047852	0.20654	NaN	NaN	NaN	NaN	NaN	NaN
1.196	-12.54	84.02	1200.1581	-1.5289	1.0007	-0.39964	-6.59792	-103.83	1618.759	-2.6772	1.8267	-0.41699	-90.1417	35.3741	27.258	0.14648	-0.042969	0.2002	NaN	NaN	NaN	NaN	NaN	NaN
1.198	-15.956	91.734	1192.5703	-1.5089	0.99879	-0.38462	-33.964	-69.613	1621.61	-2.8452	1.9204	-0.43506	-108.5336	59.5302	27.8822	0.14771	-0.049072	0.19922	NaN	NaN	NaN	NaN	NaN	NaN
1.2	-13.913	95.017	1172.5451	-1.4976	0.98682	-0.36963	-10.78142	-66.202	1617.086	-2.8813	1.9233	-0.46827	-82.2703	17.631	49.8925	0.1499	-0.054199	0.19678	NaN	NaN	NaN	NaN	NaN	NaN
1.202	-29.168	78.996	1156.8154	-1.4879	0.97511	-0.35288	-11.66951	8.9771	1599.897	-2.8413	1.8735	-0.49854	-71.0055	63.3306	52.2857	0.13477	-0.05127	0.18945	NaN	NaN	NaN	NaN	NaN	NaN
1.204	-13.946	101.148	1130.7597	-1.474	0.95775	-0.34384	-3.9812	7.176	1599.98	-2.6973	1.7695	-0.53711	-95.235	-2.871	71.793	0.12305	-0.048828	0.18555	NaN	NaN	NaN	NaN	NaN	NaN
1.206	-4.893	105.959	1106.4118	-1.4556	0.93866	-0.33473	59.082	-17.28	1647.8291	-2.6089	1.7192	-0.54736	-110.958	32.8158	81.982	0.098145	-0.03418	0.18213	NaN	NaN	NaN	NaN	NaN	NaN
1.208	4.029	117.994	1087.7504	-1.4285	0.92123	-0.33131	33.9718	17.534	1630.58622	-2.4668	1.6523	-0.57227	-97.0452	-9.6346	60.739	0.069092	-0.017822	0.17919	NaN	NaN	NaN	NaN	NaN	NaN
1.21	-2.468	115.4571	1066.1745	-1.4038	0.90479	-0.32422	55.175	-16.146	1624.983	-2.3868	1.6123	-0.58008	-77.463	56.1488	45.807	0.046387	-0.0019531	0.17676	NaN	NaN	NaN	NaN	NaN	NaN
1.212	-4.098	108.5676	1038.37	-1.3825	0.88756	-0.31413	71.278	-13.889	1632.5186	-2.3198	1.5952	-0.57568	-53.8721	1.844	56.20975	0.013672	0.025391	0.16943	NaN	NaN	NaN	NaN	NaN	NaN
1.214	-5.889	104.7729	1027.68	-1.3545	0.87194	-0.30904	64.53	4.8086	1608.9722	-2.2183	1.5493	-0.54834	-28.684	31.68997	55.451	0	0.038086	0.16797	NaN	NaN	NaN	NaN	NaN	NaN
1.216	-28.75	96.8308	1032.9824	-1.3268	0.85824	-0.30244	111.952	-26.78522	1617.0847	-2.1602	1.5156	-0.53125	-37.266	-16.8535	45.4098	-0.031738	0.059082	0.16357	NaN	NaN	NaN	NaN	NaN	NaN
1.218	-13.973	103.0128	1017.514	-1.2954	0.83638	-0.29169	104.98	32.0378	1602.6048	-2.019	1.4302	-0.53467	-27.15	36.01351	34.6057	-0.047607	0.073486	0.15258	NaN	NaN	NaN	NaN	NaN	NaN
1.22	-18.936	113.01331	1010.969	-1.2554	0.81494	-0.28076	112.802	40.6932	1578.9206	-1.9087	1.3491	-0.52832	3.701	-10.151	36.0605	-0.065918	0.086426	0.14453	NaN	NaN	NaN	NaN	NaN	NaN
1.222	-38.453	122.5192	962.92003	-1.2206	0.7888	-0.27541	128.113	32.306	1576.966	-1.8081	1.2739	-0.52588	1.636	22.42726	59.339	-0.091309	0.10645	0.13672	NaN	NaN	NaN	NaN	NaN	NaN
1.224	-90.1949	125.8533	943.4459	-1.1826	0.76214	-0.26563	81.547	102.138	1551.684	-1.7109	1.1895	-0.51758	33.261	-28.678	51.933	-0.10254	0.1123	0.12744	NaN	NaN	NaN	NaN	NaN	NaN
1.226	-84.8823	119.8497	909.7945	-1.1463	0.73517	-0.26367	64.561	69.995	1540.539	-1.6738	1.1543	-0.50684	22.655	25.975	27.8047	-0.13135	0.12012	0.11279	NaN	NaN	NaN	NaN	NaN	NaN
1.228	-77.1487	126.0779	887.072	-1.1143	0.71075	-0.2502	65.427	95.147	1536.594	-1.6309	1.1055	-0.49316	42.046	16.5237	5.782	-0.15064	0.12159	0.10376	NaN	NaN	NaN	NaN	NaN	NaN
1.23	-96.85315	129.93374	873.486	-1.0786	0.68848	-0.23975	25.58433	131.515	1492.0445	-1.6172	1.0747	-0.48169	19.027	31.292	47.73	-0.16943	0.12207	0.094727	NaN	NaN	NaN	NaN	NaN	NaN
1.232	-100.2197	135.4211	847.8351	-1.0464	0.66649	-0.23134	16.912	91.3924	1495.1539	-1.6172	1.0605	-0.4668	28.901	-60.586	80.686	-0.18848	0.12891	0.078613	NaN	NaN	NaN	NaN	NaN	NaN
1.234	-87.312	126.7523	807.806	-1.011	0.63974	-0.22236	-7.704	163.866	1476.803	-1.6113	1.0527	-0.45947	-25.9	-61.254	107.611	-0.20068	0.13135	0.070313	NaN	NaN	NaN	NaN	NaN	NaN
1.236	-75.4556	138.7857	784.606	-0.97821	0.61864	-0.20908	-46.301	157.557	1430.6172	-1.6123	1.0488	-0.45508	11.778	-55.631	127.607	-0.2085	0.13525	0.04834	NaN	NaN	NaN	NaN	NaN	NaN
1.238	-94.7753	154.67858	755.2541	-0.93818	0.59501	-0.19833	-34.5998	142.429	1421.602	-1.5957	1.0391	-0.44189	15.116	-14.064	216.307	-0.20923	0.14184	0.027832	NaN	NaN	NaN	NaN	NaN	NaN
1.24	-95.10234	156.6507	736.76093	-0.90527	0.56641	-0.19141	-64.445	173.258	1390.0018	-1.574	1.0256	-0.43335	-33.379	-33.425	326.8407	-0.20508	0.15771	0.0097656	NaN	NaN	NaN	NaN	NaN	NaN
1.242	-50.303	153.724	715.1127	-0.86582	0.54551	-0.1834	-85.883	95.333	1368.7719	-1.5488	1.0137	-0.4248	-84.385	17.4721	453.96	-0.21143	0.18262	-0.019043	NaN	NaN	NaN	NaN	NaN	NaN
1.244	-64.23	145.79	688.011	-0.82764	0.52295	-0.17559	-76.3368	95.064	1354.63072	-1.4976	0.99463	-0.40381	-57.872	46.2066	607.369	-0.22363	0.1958	-0.030273	NaN	NaN	NaN	NaN	NaN	NaN
1.246	-70.7747	143.723	677.6761	-0.79365	0.50069	-0.16114	-115.762	125.165	1288.154	-1.4683	0.98389	-0.3916	-72.95	82.1093	838.61	-0.26514	0.22021	-0.076172	NaN	NaN	NaN	NaN	NaN	NaN
1.248	-53.2224	137.699	656.5623	-0.76035	0.47832	-0.15117	-114.94	96.996	1285.143	-1.4155	0.96338	-0.37451	-65.66	40.2765	1047.714	-0.32153	0.23657	-0.10864	NaN	NaN	NaN	NaN	NaN	NaN
1.25	-29.682	147.249	629.07075	-0.72607	0.46143	-0.13916	-118.207	176.8687	1263.6692	-1.3808	0.94043	-0.35913	-70.3809	-13.4085	1178.658	-0.38867	0.26367	-0.14453	NaN	NaN	NaN	NaN	NaN	NaN
1.252	-41.078	141.997	605.1066	-0.70312	0.43926	-0.12793	-119.84	157.6746	1219.08188	-1.3457	0.91602	-0.3457	-69.551	-26.297	1259.9202	-0.51758	0.29395	-0.19043	NaN	NaN	NaN	NaN	NaN	NaN
1.254	-22.03	137.0046	588.7155	-0.67617	0.41797	-0.11563	-101.7844	158.626	1200.7491	-1.2969	0.88867	-0.32666	-99.273	-37.593	1343.167	-0.59961	0.31543	-0.20752	NaN	NaN	NaN	NaN	NaN	NaN
1.256	-2.57700000000001	123.8958	560.33801	-0.64765	0.39805	-0.10195	-72.8263	222.437	1158.2166	-1.2769	0.87549	-0.31543	-134.242	-4.254	1388.319	-0.80811	0.37158	-0.2417	NaN	NaN	NaN	NaN	NaN	NaN
1.258	7.365	124.1888	537.0884	-0.62246	0.37793	-0.088281	-65.0244	163.5789	1131.3258	-1.2305	0.84668	-0.30469	-148.492	-37.204	1405.773	-1.0205	0.43555	-0.27076	NaN	NaN	NaN	NaN	NaN	NaN
1.26	25.028	131.6839	523.158	-0.59521	0.35791	-0.07666	-49.536	182.9032	1124.968	-1.1914	0.82129	-0.2959	-97.473	-79.449	1365.665	-1.2573	0.52295	-0.29004	NaN	NaN	NaN	NaN	NaN	NaN
1.262	2.188	131.7304	495.2219	-0.56982	0.33916	-0.062109	-64.141	196.1717	1064.3279	-1.1538	0.80029	-0.28223	-30.2402	-154.688	1327.582	-1.6133	0.67871	-0.27197	NaN	NaN	NaN	NaN	NaN	NaN
1.264	0.955000000000002	123.7576	475.668	-0.53594	0.31914	-0.050976	-15.76	135.631	1028.666	-1.103	0.77783	-0.2749	14.22	-172.226	1306.6556	-1.7886	0.76416	-0.23975	NaN	NaN	NaN	NaN	NaN	NaN
1.266	5.549	125.3366	450.0156	-0.50664	0.30273	-0.036133	11.795	184.6773	995.525	-1.0781	0.76074	-0.24219	36.885	-256.889	1307.035	-2.1909	0.93408	-0.17139	NaN	NaN	NaN	NaN	NaN	NaN
1.268	-3.809	126.9128	423.498	-0.47422	0.28721	-0.02793	-4.459	158.9	943.5396	-1.0254	0.72559	-0.23047	34.87	-234.65	1282.765	-2.6035	1.1582	-0.13281	NaN	NaN	NaN	NaN	NaN	NaN
1.27	-21.548	126.076	427.858	-0.43799	0.26514	-0.011719	4.131	160.651	937.1479	-0.9668	0.69043	-0.21338	50.12327	-248.427	1250.478	-2.7729	1.2856	-0.10596	NaN	NaN	NaN	NaN	NaN	NaN
1.272	-17.917	139.41	394.4595	-0.404	0.25186	-0.0027343	5.852	213.724	869.4355	-0.93164	0.67188	-0.20215	77.0618	-146.662	1179.587	-2.9722	1.5161	-0.03418	NaN	NaN	NaN	NaN	NaN	NaN
1.274	-23.512	148.526	357.95666	-0.36338	0.23487	0.0021484	-11.743	161.3122	833.1722	-0.86768	0.62939	-0.18604	90.617	-134.254	1192.2011	-3.0007	1.6565	0.010986	NaN	NaN	NaN	NaN	NaN	NaN
1.276	-57.04	141.024	330.7332	-0.32979	0.21846	0.0095702	-7.785	176.0958	818.9248	-0.82227	0.59717	-0.17285	85.716	-87.26	1227.322	-2.9097	1.77	0.038574	NaN	NaN	NaN	NaN	NaN	NaN
1.278	-47.2	129.3312	308.289	-0.29551	0.2002	0.016699	3.745	174.688	759.6927	-0.77734	0.5625	-0.16211	68.961	-149.07	1264.393	-2.5757	1.7954	0.09082	NaN	NaN	NaN	NaN	NaN	NaN
1.28	-40.184	120.3585	300.7858	-0.25928	0.18262	0.021973	8.816	141.877	754.7082	-0.7207	0.5166	-0.14111	33.1653	-131.273	1267.929	-2.3452	1.7407	0.1123	NaN	NaN	NaN	NaN	NaN	NaN
1.282	-50.9773	115.725	284.3464	-0.22813	0.1667	0.027051	-18.044	220.178	706.1386	-0.69971	0.49658	-0.13135	24.3786	-206.161	1257.001	-1.8809	1.543	0.14111	NaN	NaN	NaN	NaN	NaN	NaN
1.284	-66.849	115.8328	271.72116	-0.1958	0.1544	0.031933	-36.533	202.321	667.883	-0.64795	0.45361	-0.11572	45.3359	-218.165	1251.982	-1.5859	1.3838	0.1438	NaN	NaN	NaN	NaN	NaN	NaN
1.286	-75.34707	108.3099	257.2308	-0.16728	0.13916	0.034668	-46.353	196.302	646.44	-0.61035	0.42334	-0.1001	69.841	-307.2309	1258.739	-1.3457	1.252	0.14307	NaN	NaN	NaN	NaN	NaN	NaN
1.288	-65.8811	97.885	236.5729	-0.1375	0.12773	0.037403	-68.209	232.821	575.1544	-0.57324	0.39307	-0.083496	60.739	-312.994	1265.259	-1.1367	1.1641	0.13135	NaN	NaN	NaN	NaN	NaN	NaN
1.29	-79.6341	98.4889	227.5002	-0.1123	0.12305	0.041016	-84.366	164.5034	519.472	-0.52979	0.35693	-0.063477	100.433	-354.157	1296.414	-1.0562	1.1479	0.11914	NaN	NaN	NaN	NaN	NaN	NaN
1.292	-77.1649	92.82951	211.2067	-0.089551	0.11826	0.04043	-74.428	182.2521	488.208	-0.50732	0.33887	-0.055664	89.923	-361.676	1349.161	-0.92041	1.1387	0.10156	NaN	NaN	NaN	NaN	NaN	NaN
1.294	-76.1197	94.0318	196.4617	-0.069433	0.1166	0.042774	-116.185	195.1647	442.942	-0.46387	0.30273	-0.041992	68.843	-414.64	1406.2253	-0.80762	1.1245	0.060791	NaN	NaN	NaN	NaN	NaN	NaN
1.296	-51.078	100.9364	188.6992	-0.049121	0.11387	0.048243	-124.388	145.646	431.513	-0.43189	0.27539	-0.025879	1.755	-379.94	1455.325	-0.68164	1.0889	0.010742	NaN	NaN	NaN	NaN	NaN	NaN
1.298	-78.9693	99.9185	182.9305	-0.032129	0.11309	0.048144	-128.851	192.4133	376.524	-0.40088	0.25195	-0.014648	-24.897	-347.2	1475.4341	-0.50439	1.0195	-0.057129	NaN	NaN	NaN	NaN	NaN	NaN
1.3	-53.165	84.5271	172.77	-0.019043	0.11523	0.053711	-141.752	163.3285	324.213	-0.36377	0.22119	-0.0039063	-51.006	-246.655	1492.483	-0.42383	0.98047	-0.085938	NaN	NaN	NaN	NaN	NaN	NaN
1.302	-25.727	73.7601	154.69696	-0.0014648	0.11836	0.053418	-124.1914	164.007	318.3941	-0.33643	0.20313	0.0014648	-96.427	-196.6757	1534.95702	-0.31738	0.89648	-0.13965	NaN	NaN	NaN	NaN	NaN	NaN
1.304	-33.215	91.6662	136.8451	0.0072265	0.11924	0.05459	-122.924	222.785	291.7165	-0.30322	0.17627	0.0068359	-141.5346	-157.622	1556.25784	-0.30664	0.85351	-0.17163	NaN	NaN	NaN	NaN	NaN	NaN
1.306	-27.616	91.63808	127.0632	0.018164	0.12158	0.056934	-125.079	169.938	273.6224	-0.27222	0.15527	0.0090332	-143.392	-129.842	1549.9242	-0.35791	0.83252	-0.19141	NaN	NaN	NaN	NaN	NaN	NaN
1.308	-23.998	80.3707	125.3844	0.02461	0.12569	0.06416	-94.7189	185.5245	257.94	-0.2417	0.13525	0.015137	-110.015	-96.473	1578.166	-0.53467	0.87646	-0.17822	NaN	NaN	NaN	NaN	NaN	NaN
1.31	1.31	78.35	105.5933	0.032227	0.12793	0.061523	-72.1489	177.1195	223.762	-0.21143	0.10791	0.015137	-103.705	-82.852	1610.8627	-0.66797	0.92383	-0.15234	NaN	NaN	NaN	NaN	NaN	NaN
1.312	-12.117	72.00237	91.1143	0.034277	0.13017	0.065527	-77.5956	106.346	223.7273	-0.19629	0.09375	0.022949	-119.187	-99.277	1664.643	-0.97949	1.0498	-0.097656	NaN	NaN	NaN	NaN	NaN	NaN
1.314	5.102	67.0829	90.107	0.034473	0.1334	0.065625	-42.265	151.5935	197.4555	-0.17041	0.079102	0.023926	-110.0116	-97.3623	1636.045	-1.2214	1.1555	-0.054688	NaN	NaN	NaN	NaN	NaN	NaN
1.316	-12.106	62.0301	94.067	0.042676	0.13457	0.067969	-31.127	132.931	160.80756	-0.15747	0.058593	0.027832	-113.7819	-112.3772	1600.711	-1.4575	1.27	-0.045898	NaN	NaN	NaN	NaN	NaN	NaN
1.318	-16.612	68.392	85.9037	0.044824	0.13613	0.069336	-29.252	126.029	152.783	-0.14404	0.049316	0.034668	-79.0576	-102.118	1642.165	-1.7539	1.4004	-0.077637	NaN	NaN	NaN	NaN	NaN	NaN
1.32	-5.618	83.194	69.5133	0.048828	0.14014	0.072754	11.127	171.467	130.6941	-0.13428	0.033691	0.038086	-98.7936	-122.873	1703.043	-1.8779	1.457	-0.10547	NaN	NaN	NaN	NaN	NaN	NaN
1.322	-24.697	76.108	73.3838	0.050879	0.13789	0.06543	-1.444	91.945	130.852	-0.13086	0.033203	0.040039	-99.7173	-97.544	1749.085	-2.0723	1.5684	-0.14014	NaN	NaN	NaN	NaN	NaN	NaN
1.324	-16.453	59.225	78.6814	0.054688	0.13731	0.062695	2.265	95.6618	116.91	-0.12109	0.032715	0.04834	-95.66	-134.489	1768.473	-2.199	1.6516	-0.14502	NaN	NaN	NaN	NaN	NaN	NaN
1.326	-26.551	52.2064	68.8299	0.057032	0.13887	0.059961	34.178	87.3706	88.752	-0.11841	0.036377	0.057129	-64.487	-97.9069	1796.417	-2.3159	1.7368	-0.13818	NaN	NaN	NaN	NaN	NaN	NaN
1.328	-31.579	52.1665	49.2668	0.059961	0.13496	0.059375	27.858	28.736	104.9733	-0.11475	0.043457	0.063477	-46.572	-132.122	1867.576	-2.4668	1.8535	-0.12598	NaN	NaN	NaN	NaN	NaN	NaN
1.33	-43.45	37.5029	55.0018	0.062012	0.12793	0.061035	28.89	88.524	94.5293	-0.1167	0.054199	0.073242	-42.209	-77.343	1863.943	-2.5391	1.9082	-0.1084	NaN	NaN	NaN	NaN	NaN	NaN
1.332	-38.961	40.612	48.6085	0.07002	0.11983	0.057813	26.656	76.823	71.637	-0.12256	0.058105	0.07666	-29.011	-80.975	1833.803	-2.6675	2.0005	-0.078125	NaN	NaN	NaN	NaN	NaN	NaN
1.334	-35.122	39.7098	42.5936	0.075879	0.11142	0.061817	32.3	64.984	71.533	-0.12646	0.068359	0.089355	-13.263	-24.95	1776.045	-2.7449	2.0227	-0.05835	NaN	NaN	NaN	NaN	NaN	NaN
1.336	-64.261	38.5438	42.501607	0.07705	0.10049	0.060254	24.309	91.534	50.851	-0.12524	0.079346	0.093994	-13	-77.9149	1732.672	-2.8081	1.9985	-0.035156	NaN	NaN	NaN	NaN	NaN	NaN
1.338	-65.7311	30.7291	36.1945	0.084082	0.087305	0.064355	-17.278	12.1041	57.451	-0.13135	0.091797	0.10205	-7.627	-18.6151	1714.003	-2.8647	1.936	-0.012695	NaN	NaN	NaN	NaN	NaN	NaN
1.34	-83.4104	29.6902	41.6767	0.090332	0.074219	0.066895	-10.545	34.76875	60.579	-0.13184	0.10449	0.10645	13.883	-59.881	1706.8252	-2.8867	1.9121	-0.0083008	NaN	NaN	NaN	NaN	NaN	NaN
1.342	-65.241	38.4408	30.8686	0.089648	0.065234	0.07041	-19.806	29.398	34.018	-0.13574	0.11475	0.10986	5.441	21.409	1675.771	-2.9058	1.8911	0.0092773	NaN	NaN	NaN	NaN	NaN	NaN
1.344	-85.7865	43.9248	38.3559	0.094141	0.053809	0.073047	-35.672	-27.4134	29.963	-0.1377	0.12012	0.11377	-9.327	-18.248	1665.681	-2.8952	1.8977	0.0021973	NaN	NaN	NaN	NaN	NaN	NaN
1.346	-69.97948	41.9975	32.4358	0.099611	0.043262	0.077344	-56.8542	11.4385	35.2679	-0.1333	0.12867	0.11744	-56.971	53.598	1666.62362	-2.8472	1.9106	0.0024414	NaN	NaN	NaN	NaN	NaN	NaN
1.348	-70.09012	27.47541	25.046	0.10478	0.036035	0.081641	-93.407	-19.1104	15.5888	-0.12646	0.13867	0.12061	-75.259	6.856	1679.3451	-2.6895	1.8926	0.010742	NaN	NaN	NaN	NaN	NaN	NaN
1.35	-48.574	32.2725	20.1571	0.10938	0.025879	0.083496	-85.8984	-10.2293	20.9368	-0.11328	0.14063	0.12158	-48.933	96.316	1679.894	-2.5723	1.8555	0.003418	NaN	NaN	NaN	NaN	NaN	NaN
1.352	-44.222	27.8417	32.0592	0.11602	0.019531	0.081836	-74.3861	38.1695	0.899000000000001	-0.104	0.14307	0.12305	-59.501	45.115	1654.632	-2.3203	1.7031	-0.026367	NaN	NaN	NaN	NaN	NaN	NaN
1.354	-40.781	40.8766	24.45681	0.12422	0.01084	0.086133	-117.423	-6.296	16.4998	-0.085938	0.13477	0.12207	-101.577	110.973	1653.188	-2.1406	1.5693	-0.050293	NaN	NaN	NaN	NaN	NaN	NaN
1.356	-22.204	47.552	34.8537	0.13633	0.0014648	0.086523	-91.6959	17.1659	47.1075	-0.063232	0.1289	0.12256	-141.99	23.856	1664.7796	-1.9917	1.4478	-0.072266	NaN	NaN	NaN	NaN	NaN	NaN
1.358	-39.089	44.179	24.442	0.14336	-0.011426	0.08418	-85.366	36.5713	17.895	-0.041992	0.11914	0.11963	-156.199	71.268	1618.6817	-1.8516	1.3262	-0.11133	NaN	NaN	NaN	NaN	NaN	NaN
1.36	-13.445	25.3168	31.2739	0.15479	-0.027344	0.086426	-83.1492	-9.624	15.162	-0.0087891	0.090332	0.11426	-137.873	8.18499999999999	1587.4839	-1.7964	1.272	-0.12598	NaN	NaN	NaN	NaN	NaN	NaN
1.362	-18.952	11.6203	49.54042	0.16152	-0.041211	0.085449	-51.088	32.774	18.556	0.0058594	0.07373	0.11133	-122.0611	77.305	1575.5521	-1.7222	1.188	-0.14307	NaN	NaN	NaN	NaN	NaN	NaN
1.364	-0.946999999999996	18.64337	32.68925	0.16953	-0.054394	0.081543	-75.2748	7.5389	24.9264	0.04834	0.046387	0.10254	-95.2282	23.756	1581.731	-1.686	1.1499	-0.14063	NaN	NaN	NaN	NaN	NaN	NaN
1.366	0.997000000000003	27.1163	28.7566	0.17773	-0.069629	0.082715	-69.9707	17.5729	27.297	0.077637	0.023193	0.10913	-113.97754	120.959	1543.7547	-1.6689	1.1172	-0.14063	NaN	NaN	NaN	NaN	NaN	NaN
1.368	-5.829	27.25	43.0477	0.18262	-0.086816	0.086524	-8.537	71.462	7.9111	0.10693	0.0014648	0.10938	-106.8762	108.465	1487.897	-1.666	1.0918	-0.12793	NaN	NaN	NaN	NaN	NaN	NaN
1.37	-1.638	21.2975	49.0061	0.18066	-0.096191	0.080566	-36.649	21.424	3.796	0.14209	-0.032227	0.10352	-128.837	216.173	1449.749	-1.6694	1.0942	-0.12402	NaN	NaN	NaN	NaN	NaN	NaN
1.372	5.079	34.715	26.2278	0.17627	-0.10889	0.083789	-24.106	31.513	24.1264	0.16162	-0.047852	0.098633	-70.9281	175.2175	1460.1276	-1.6523	1.0977	-0.10986	NaN	NaN	NaN	NaN	NaN	NaN
1.374	11.536	28.3442	32.2978	0.16797	-0.11523	0.081738	26.781	25.232	17.2533	0.19531	-0.075684	0.10156	-85.0203	259.73	1454.0444	-1.6311	1.1087	-0.098877	NaN	NaN	NaN	NaN	NaN	NaN
1.376	-10.765	25.5808	37.542	0.15625	-0.11836	0.083301	2.362	-23.419	15.1617	0.2229	-0.1001	0.10083	-56.4996	243.415	1427.797	-1.5938	1.1211	-0.09375	NaN	NaN	NaN	NaN	NaN	NaN
1.378	-12.4	30.6088	51.9025	0.14873	-0.12334	0.088379	31.371	31.7285	14.018	0.24854	-0.12354	0.10303	-40.059	320.235	1376.5207	-1.5308	1.1294	-0.083496	NaN	NaN	NaN	NaN	NaN	NaN
1.38	-17.119	31.02283	33.2126	0.13525	-0.12451	0.088867	43.5542	2.081	21.2351	0.2793	-0.15088	0.10693	-20.2684	262.77	1329.1417	-1.4941	1.1289	-0.081543	NaN	NaN	NaN	NaN	NaN	NaN
1.382	-30.533	22.5454	51.8612	0.11944	-0.11631	0.086133	27.115	9.66361	47.815	0.29639	-0.1626	0.11133	-14.873	290.795	1299.72	-1.4297	1.1191	-0.079102	NaN	NaN	NaN	NaN	NaN	NaN
1.384	-21.976	1.4321	76.8392	0.10635	-0.11035	0.087695	41.428	67.073	30.9653	0.32373	-0.18311	0.104	3.459	232.436	1272.433	-1.3889	1.1067	-0.075196	NaN	NaN	NaN	NaN	NaN	NaN
1.386	-61.7603	-22.917	76.024	0.096582	-0.10098	0.085742	26.598	40.04	15.4386	0.33936	-0.19458	0.10645	42.825	268.3709	1229.242	-1.3496	1.082	-0.07373	NaN	NaN	NaN	NaN	NaN	NaN
1.388	-52.745	-10.975	73.5954	0.087988	-0.087207	0.084766	36.069	59.504	34.6312	0.35693	-0.20313	0.10205	78.071	220.135	1188.792	-1.3003	1.0542	-0.073242	NaN	NaN	NaN	NaN	NaN	NaN
1.39	-56.4007	-2.156	127.2285	0.07666	-0.074707	0.086426	4.858	51.281	30.9318	0.36719	-0.20605	0.092773	70.4922	263.0102	1165.818	-1.2813	1.043	-0.078125	NaN	NaN	NaN	NaN	NaN	NaN
1.392	-84.4452	4.4309	198.5188	0.063086	-0.059863	0.089258	-27.494	10.9401	35.1773	0.36719	-0.20801	0.10156	64.018	236.8612	1140.25	-1.228	1.0083	-0.068359	NaN	NaN	NaN	NaN	NaN	NaN
1.394	-115.9907	-1.0773	261.791	0.050098	-0.043555	0.082031	-2.357	44.043	25.49841	0.36865	-0.20557	0.10303	73.16	282.5268	1093.528	-1.1885	0.98096	-0.067139	NaN	NaN	NaN	NaN	NaN	NaN
1.396	-106.726	-19.8212	316.6	0.036816	-0.029493	0.080078	-27.708	13.8805	-1.881	0.35791	-0.19531	0.10474	54.82	257.9353	1052.438	-1.1455	0.95508	-0.068848	NaN	NaN	NaN	NaN	NaN	NaN
1.398	-107.561	-36.075	406.268	0.020118	-0.015918	0.066504	-55.6373	6.5071	22.7178	0.34473	-0.18408	0.10547	33.5943	273.1172	1040.252	-1.0659	0.90283	-0.078125	NaN	NaN	NaN	NaN	NaN	NaN
1.4	-114.465	-17.8583	515.361	0.00048828	-0.0068359	0.054688	-49.5545	50.107	20.6435	0.32031	-0.15674	0.10791	39.6048	242.018	1019.833	-1.0269	0.86963	-0.091309	NaN	NaN	NaN	NaN	NaN	NaN
1.402	-137.591	-24.0817	605.47581	-0.017383	0.0091795	0.047656	-84.8992	33.35059	8.3545	0.30127	-0.14404	0.10986	40.35577445	262.7103	976.685	-0.92139	0.79736	-0.099609	NaN	NaN	NaN	NaN	NaN	NaN
1.404	-160.8223	-7.876	625.265332	-0.043066	0.022656	0.035351	-56.7621	67.7361	33.1086	0.26074	-0.1123	0.1123	44.768	269.3629	891.4445	-0.85132	0.73755	-0.10523	NaN	NaN	NaN	NaN	NaN	NaN
1.406	-105.771	-26.662	672.964	-0.081738	0.036719	0.018164	-73.8546	56.727	28.7157	0.23755	-0.08545	0.12036	28.1512	282.473	824.699	-0.77734	0.68359	-0.11914	NaN	NaN	NaN	NaN	NaN	NaN
1.408	-65.5609	-14.733	729.3568	-0.1294	0.053516	-0.00087888	-119.038	7.628	52.305	0.20459	-0.057129	0.12451	0.735999999999999	252.0635	789.73	-0.68311	0.604	-0.13135	NaN	NaN	NaN	NaN	NaN	NaN
1.41	-48.998	-14.248	773.3775	-0.18652	0.069336	-0.023438	-72.7665	28.8226	54.314	0.16504	-0.026367	0.13086	-13.077	259.903	744.771	-0.63525	0.5708	-0.1333	NaN	NaN	NaN	NaN	NaN	NaN
1.412	-38.385	-10.1677	808.2431	-0.25791	0.096584	-0.040527	-82.5819	3.349	25.031965	0.14648	-0.0097656	0.13184	-11.754	243.106	680.021	-0.55615	0.49365	-0.14404	NaN	NaN	NaN	NaN	NaN	NaN
1.414	-2.9575	-9.351	834.097	-0.34463	0.1251	-0.060156	-99.68	9.92	45.1337	0.11816	0.01416	0.13281	-11.43	232.708	630.428	-0.50683	0.43969	-0.15576	NaN	NaN	NaN	NaN	NaN	NaN
1.416	19.227026	-14.2	886.34	-0.44775	0.17314	-0.083204	-50.1046	33.7853	48.8722	0.10059	0.035645	0.12695	-79.927	206.503	589.7253	-0.45752	0.38867	-0.15479	NaN	NaN	NaN	NaN	NaN	NaN
1.418	28.3633	-22.277	910.533	-0.57393	0.23017	-0.10713	-80.9448	-0.193	34.4118	0.087891	0.040527	0.12939	-67.94	192.801	556.8725	-0.39258	0.32422	-0.17627	NaN	NaN	NaN	NaN	NaN	NaN
1.42	37.4707	-36.7124	935.088	-0.70508	0.29395	-0.12549	-43.479	27.9907	36.2177	0.083496	0.053223	0.125	-87.28	207.134	504.0847	-0.34838	0.2854	-0.17359	NaN	NaN	NaN	NaN	NaN	NaN
1.422	71.068	-43.211	950.826	-0.84209	0.37334	-0.15107	-17.478	30.5478	16.5713	0.08374	0.058349	0.12036	-53.923	213.234	438.676	-0.30859	0.24463	-0.17578	NaN	NaN	NaN	NaN	NaN	NaN
1.424	91.175	-33.02	973.932	-0.98857	0.46299	-0.15518	-48.5967	2.292	31.0498	0.083008	0.069336	0.11279	-79.692	233.6182	388.4	-0.25146	0.18945	-0.18066	NaN	NaN	NaN	NaN	NaN	NaN
1.426	63.068	-16.571	1006.11746	-1.1386	0.56221	-0.16572	12.546	19.12374	51.9018	0.081543	0.084961	0.11084	-50.7369	211.819	389.7107	-0.2251	0.16162	-0.18262	NaN	NaN	NaN	NaN	NaN	NaN
1.428	32.1088	2.02	1024.5077	-1.2856	0.67178	-0.1711	0.0120000000000005	0.0792999999999999	35.4251	0.077637	0.093262	0.10449	-35.96	215.982	336.2222	-0.16895	0.11133	-0.19238	NaN	NaN	NaN	NaN	NaN	NaN
1.43	55.068	-29.937	1024.3872	-1.4272	0.77881	-0.17236	0.0740000000000052	5.404	34.88018	0.063965	0.11377	0.10254	-11.815	194.1131	284.796	-0.12549	0.068359	-0.19385	NaN	NaN	NaN	NaN	NaN	NaN
1.432	49.129	-67.292	1000.2727	-1.5596	0.89668	-0.16455	40.9548	31.7812	31.7103	0.051025	0.12403	0.09668	-21.3053	189.186	232.7361	-0.085938	0.034668	-0.19482	NaN	NaN	NaN	NaN	NaN	NaN
1.434	40.082	-92.3178	999.6725	-1.6782	1.0075	-0.15371	23.072	8.5019	34.136934	0.043945	0.1377	0.094238	-14.78	134.09687	217.6928	-0.038086	-0.015625	-0.19189	NaN	NaN	NaN	NaN	NaN	NaN
1.436	32.614	-82.0099	1014.279	-1.7782	1.1176	-0.13653	25.397	28.8587	55.827	0.026855	0.15967	0.088379	5.445	138.8368	189.7179	-0.018555	-0.033203	-0.19727	NaN	NaN	NaN	NaN	NaN	NaN
1.438	57.36	-83.175	1030.6	-1.8576	1.2182	-0.12588	31.061	39.294	5.7651	0.021484	0.17529	0.087891	12.764	127.359	152.404	0.010742	-0.075195	-0.19531	NaN	NaN	NaN	NaN	NaN	NaN
1.44	54.331	-98.8089	1012.9645	-1.9141	1.3066	-0.12354	9.183	12.214	9.2331	0.0087891	0.20068	0.089844	-5.233	158.86	85.062	0.026123	-0.099365	-0.198	NaN	NaN	NaN	NaN	NaN	NaN
1.442	64.808	-115.8822	1003.365	-1.9233	1.3633	-0.13633	52.1702	18.4784	31.402	0.0039063	0.20849	0.081055	25.8505	134.7295	85.221	0.039551	-0.12256	-0.1958	NaN	NaN	NaN	NaN	NaN	NaN
1.444	43.4521	-146.76	1020.026	-1.8964	1.3829	-0.1459	4.646	-8.4525	14.2964	-0.00097656	0.21484	0.077637	29.012	146.403	83.255	0.037109	-0.14551	-0.19775	NaN	NaN	NaN	NaN	NaN	NaN
1.446	23.491	-150.668	1046.523	-1.8292	1.3641	-0.16621	-23.608	-21.6904	37.48457	-0.0068359	0.22412	0.068359	71.3353	113.153	86.5522	0.037109	-0.15332	-0.19482	NaN	NaN	NaN	NaN	NaN	NaN
1.448	0.785	-143.186	1061.728	-1.74	1.3298	-0.17363	19.376	-6.1455	48.906	-0.012695	0.22168	0.06543	58.8689	136.919	59.6764	0.026855	-0.1709	-0.19482	NaN	NaN	NaN	NaN	NaN	NaN
1.45	-49.9271	-141.848	1079.654	-1.6343	1.2837	-0.17334	-47.217	-51.4575	49.768	-0.024902	0.22754	0.058594	57.135	90.094	77.925	0.0095213	-0.17505	-0.19678	NaN	NaN	NaN	NaN	NaN	NaN
1.452	-64.81164	-137.36	1096.199	-1.5434	1.2188	-0.15967	-48.866	-26.0038	120.8972	-0.034424	0.22608	0.052978	28.625	82.397	82.466	-0.0068359	-0.17236	-0.19531	NaN	NaN	NaN	NaN	NaN	NaN
1.454	-63.3377	-132.584	1104.1071	-1.4695	1.1681	-0.13653	-37.639	24.5725	141.7391	-0.050293	0.22656	0.043457	15.531	30.1053	92.761	-0.036133	-0.1665	-0.19189	NaN	NaN	NaN	NaN	NaN	NaN
1.456	-59.235	-127.112	1112.833	-1.4214	1.1239	-0.10645	-94.519	26.2576	196.7823	-0.070801	0.23438	0.018555	-1.005	52.94681	50.28747	-0.051758	-0.15918	-0.19727	NaN	NaN	NaN	NaN	NaN	NaN
1.458	-85.573	-130.5	1122.157	-1.3934	1.0918	-0.091992	-72.258	37.981	294.137	-0.084961	0.24512	0.0053711	-19.338	22.233	52.8021	-0.089844	-0.14014	-0.19727	NaN	NaN	NaN	NaN	NaN	NaN
1.46	-79.044	-134.621	1152.468	-1.3633	1.0625	-0.079102	-123.744	25.5631	396.214	-0.11865	0.26709	-0.0058594	-35.281	38.3555	53.982	-0.11743	-0.12207	-0.19995	NaN	NaN	NaN	NaN	NaN	NaN
1.462	-55.7478	-133.3368	1192.022	-1.3192	1.039	-0.072265	-123.5536	29.892	599.299	-0.16431	0.27954	-0.021973	-52.3728	-12.3878	71.195	-0.14795	-0.10498	-0.20215	NaN	NaN	NaN	NaN	NaN	NaN
1.464	-45.43541	-133.038	1191.076	-1.2655	1.022	-0.066211	-88.9349	71.2592	753.874	-0.21875	0.29688	-0.04541	-65.59	9.912	31.3255	-0.19189	-0.081055	-0.20459	NaN	NaN	NaN	NaN	NaN	NaN
1.466	-23.7455	-130.544	1222.4783	-1.203	1.0064	-0.062695	-128.663	34.603	857.316	-0.31104	0.32959	-0.087402	-62.4623	-19.58838	35.3694	-0.21631	-0.071289	-0.19775	NaN	NaN	NaN	NaN	NaN	NaN
1.468	-13.078	-146.345	1230.7597	-1.1457	0.98594	-0.057715	-89.9647	14.3364	962.7223	-0.36816	0.354	-0.11475	-73.8332	2.815	33.5414	-0.26025	-0.043457	-0.2085	NaN	NaN	NaN	NaN	NaN	NaN
1.47	-7.299	-134.973	1256.7939	-1.0879	0.95313	-0.050781	-62.0915	15.235	1047.22	-0.5	0.3916	-0.15869	-71.416	-40.041	80.796	-0.29541	-0.026612	-0.20898	NaN	NaN	NaN	NaN	NaN	NaN
1.472	-20.947	-127.217	1282.06153	-1.0313	0.93037	-0.043262	-89.534	-2.71	1148.323	-0.63111	0.43652	-0.18091	-86.8313	0.945999999999998	70.022	-0.32959	-0.0073242	-0.20068	NaN	NaN	NaN	NaN	NaN	NaN
1.474	-41.9719	-122.7505	1324.755	-0.98466	0.90244	-0.033887	-42.97037	17.413	1221.296	-0.79053	0.49561	-0.20264	-90.998	2.842	61.7967	-0.38818	0.025391	-0.18604	NaN	NaN	NaN	NaN	NaN	NaN
1.476	-21.73	-138.626	1354.374	-0.94522	0.87861	-0.026074	-32.985	-43.038	1211.759	-1.0601	0.62061	-0.24072	-91.9879	47.47	1.646	-0.42676	0.04248	-0.17773	NaN	NaN	NaN	NaN	NaN	NaN
1.478	-21.307	-136.023	1363.2089	-0.9166	0.85762	-0.024805	30.6012	-133.69	1242.121	-1.2168	0.69727	-0.26074	-95.828	29.02235	7.324	-0.49219	0.081055	-0.15967	NaN	NaN	NaN	NaN	NaN	NaN
1.48	6.575	-122.537	1361.2472	-0.88525	0.83545	-0.027832	110.9381	-143.652	1255.57	-1.5444	0.86768	-0.27832	-96.6708	48.9809	15.397	-0.53418	0.1123	-0.14697	NaN	NaN	NaN	NaN	NaN	NaN
1.482	-8.232	-108.798	1376.93006	-0.85703	0.80078	-0.037597	70.859	-172.153	1249.037	-1.8101	1.0034	-0.27026	-82.08149	28.5073	14.246	-0.57666	0.14746	-0.13232	NaN	NaN	NaN	NaN	NaN	NaN
1.484	37.0449	-99.822	1386.9884	-0.83252	0.7626	-0.051172	119.814	-159.45	1254.194	-2.0737	1.1372	-0.24707	-63.745	33.021	-2.792	-0.6167	0.19385	-0.10596	NaN	NaN	NaN	NaN	NaN	NaN
1.486	8.236	-102.0723	1381.2405	-0.82119	0.7247	-0.069922	146.153	-130.924	1184.855	-2.3906	1.3301	-0.20264	-69.2	-17.8089	5.729	-0.62793	0.22021	-0.092773	NaN	NaN	NaN	NaN	NaN	NaN
1.488	33.0671	-103.429	1374.6922	-0.83213	0.69541	-0.085156	126.099	-167.312	1184.238	-2.5215	1.4297	-0.18359	-47.012	-16.1563	16.91688	-0.62842	0.26611	-0.07373	NaN	NaN	NaN	NaN	NaN	NaN
1.49	31.12	-112.768	1394.174	-0.8623	0.66895	-0.095703	173.716	-121.747	1184.926	-2.6992	1.6348	-0.15771	-32.715	-12.12803	24.0194	-0.60498	0.29908	-0.062744	NaN	NaN	NaN	NaN	NaN	NaN
1.492	27.3	-104.876	1405.163	-0.91924	0.66963	-0.10498	157.782	-68.669	1142.805	-2.7312	1.7439	-0.16138	2.228	30.131	-9.9434	-0.56787	0.31787	-0.049316	NaN	NaN	NaN	NaN	NaN	NaN
1.494	28.274	-84.993855	1402.9478	-0.99355	0.6748	-0.12764	141.554	-59.739	1187.87527	-2.6616	1.7935	-0.19189	12.728	60.041	-14.861	-0.4834	0.32275	-0.04248	NaN	NaN	NaN	NaN	NaN	NaN
1.496	-17.092	-62.979	1404.5594	-1.0819	0.69433	-0.16709	137.292	-42.456	1188.6795	-2.3745	1.7407	-0.2373	24.027	53.4221	5.425	-0.43311	0.31738	-0.041504	NaN	NaN	NaN	NaN	NaN	NaN
1.498	-16.283	-56.438	1407.3347	-1.1846	0.72949	-0.20488	40.859	-92.098	1175.6884	-2.1655	1.686	-0.23926	2.268	33.08	27.90197	-0.31445	0.27539	-0.038574	NaN	NaN	NaN	NaN	NaN	NaN
1.5	-61.5606	-65.207	1421.1057	-1.2964	0.77783	-0.2417	51.713	-104.898	1158.7696	-1.7637	1.541	-0.20068	22.223	51.5922	21.2764	-0.21753	0.22852	-0.040039	NaN	NaN	NaN	NaN	NaN	NaN
1.502	-61.7399	-80.725	1433.5493	-1.4257	0.85157	-0.2664	85.855	-112.021	1123.434	-1.5378	1.4378	-0.16089	38.2626	47.452	26.8855	-0.125	0.17529	-0.042969	NaN	NaN	NaN	NaN	NaN	NaN
1.504	-82.7941	-88.563	1432.4536	-1.5746	0.94805	-0.27422	72.409	-191.69	1138.2012	-1.3862	1.3579	-0.12158	18.339	46.8846	39.2023	-0.01123	0.087402	-0.043945	NaN	NaN	NaN	NaN	NaN	NaN
1.506	-95.1896	-84.7868	1426.8367	-1.7398	1.075	-0.27265	74.595	-217.684	1193.1782	-1.291	1.2695	-0.048828	14.255	44.7914	62.187	0.040039	0.044434	-0.043945	NaN	NaN	NaN	NaN	NaN	NaN
1.508	-94.41289	-64.935	1419.94827	-1.921	1.2249	-0.26514	52.428	-246.5273	1206.1879	-1.2656	1.2402	-0.0053711	11.137	59.049	48.132	0.12646	-0.025879	-0.050293	NaN	NaN	NaN	NaN	NaN	NaN
1.51	-95.9099	-53.364	1401.0643	-2.0991	1.3833	-0.26514	37.1182	-291.978	1232.444	-1.2324	1.209	0.041504	7.688	76.524	17.2	0.17847	-0.073486	-0.052246	NaN	NaN	NaN	NaN	NaN	NaN
1.512	-79.1129	-65.348	1420.1991	-2.2421	1.5436	-0.2666	22.7293	-296.177	1260.936	-1.1709	1.1723	0.070557	-4.677	61.367	24.5582	0.21436	-0.10889	-0.056641	NaN	NaN	NaN	NaN	NaN	NaN
1.514	-84.2815	-72.806	1442.2769	-2.3281	1.6845	-0.26641	-29.8328	-341.48	1294.741	-1.0796	1.1333	0.089844	-40.254	46.415	52.212	0.25391	-0.14258	-0.052734	NaN	NaN	NaN	NaN	NaN	NaN
1.516	-84.1684	-69.903	1452.0719	-2.3484	1.7845	-0.26055	-46.381	-347.836	1359.164	-0.91797	1.0586	0.10986	-43.452	31.4782	60.5981	0.26807	-0.15234	-0.063477	NaN	NaN	NaN	NaN	NaN	NaN
1.518	-77.3803	-55.042	1443.6176	-2.3024	1.8304	-0.25713	-55.1979	-239.138	1361.294	-0.83447	1.0063	0.10596	-50.03	34.4819	41.6682	0.29102	-0.17285	-0.049316	NaN	NaN	NaN	NaN	NaN	NaN
1.52	-91.0831	-32.1984	1455.5165	-2.189	1.8315	-0.23779	-111.515	-204.154	1380.082	-0.68945	0.89746	0.079102	-44.75	22.788	59.6328	0.3147	-0.19409	-0.052002	NaN	NaN	NaN	NaN	NaN	NaN
1.522	-115.9413	-19.797	1461.0612	-2.2196	1.787	-0.3208	-84.363	-166.065	1434.537	-0.61109	0.81665	0.048096	-69.6651	7.2819	65.249	0.33252	-0.21338	-0.053711	NaN	NaN	NaN	NaN	NaN	NaN
1.524	-112.5506	-10.687	1431.2385	-2.1855	1.7732	-0.37139	-82.914	-159.705	1396.597	-0.55225	0.74951	0.0039063	-80.0954	-18.9541	81.661	0.34521	-0.23926	-0.053223	NaN	NaN	NaN	NaN	NaN	NaN
1.526	-87.2174	-19.797	1411.611	-2.0616	1.722	-0.31435	-89.082	-204.883	1415.898	-0.52344	0.67871	-0.062012	-98.1857	11.679	55.732	0.3501	-0.24854	-0.056152	NaN	NaN	NaN	NaN	NaN	NaN
1.528	-86.3722	-20.7786	1412.8962	-1.9771	1.6343	-0.25713	-19.0628	-153.103	1433.217	-0.52832	0.65039	-0.091797	-99.451	19.27	48.2813	0.34961	-0.27002	-0.058594	NaN	NaN	NaN	NaN	NaN	NaN
1.53	-60.524	-19.57103	1413.1339	-1.9272	1.5728	-0.25195	-36.8744	-155.649	1415.921	-0.56982	0.6167	-0.15527	-90.4179	31.6082	39.7666	0.33813	-0.28614	-0.061035	NaN	NaN	NaN	NaN	NaN	NaN
1.532	-51.172	-15.1192	1396.64315	-1.8758	1.5347	-0.24385	-30.157	-155.8732	1449.13	-0.63013	0.62573	-0.17993	-79.2785	-4.55	79.857	0.33008	-0.29346	-0.063477	NaN	NaN	NaN	NaN	NaN	NaN
1.534	-14.357	-9.61784	1381.9621	-1.8156	1.4887	-0.23252	4.387	-99.671	1445.483	-0.70947	0.64111	-0.19385	-98.79855	0.396000000000001	31.1683	0.30225	-0.29541	-0.064453	NaN	NaN	NaN	NaN	NaN	NaN
1.536	-18.679	-11.54871	1367.4555	-1.7656	1.4324	-0.21885	-16.186	-150.3458	1482.121	-0.84326	0.69971	-0.20264	-80.518	-4.701	17.363	0.29248	-0.30029	-0.060547	NaN	NaN	NaN	NaN	NaN	NaN
1.538	2.313	-4.8047	1359.3022	-1.7195	1.3723	-0.20088	41.468	-122.3794	1533.675	-0.92725	0.72803	-0.20898	-57.182	2.577	7.03	0.26367	-0.28516	-0.062988	NaN	NaN	NaN	NaN	NaN	NaN
1.54	-4.326	-6.85006	1345.2305	-1.6753	1.3286	-0.19092	36.024	-123.3562	1545.8148	-1.0996	0.81055	-0.22559	-52.539	-15.4727	22.4765	0.24048	-0.2688	-0.061524	NaN	NaN	NaN	NaN	NaN	NaN
1.542	-19.563	3.241637	1330.818	-1.632	1.2867	-0.18838	4.716	-186.072	1604.255	-1.2378	0.89502	-0.24243	-43.527	5.0399	19.3461	0.21973	-0.26123	-0.062012	NaN	NaN	NaN	NaN	NaN	NaN
1.544	-30.375	8.6752	1326.944	-1.5914	1.2492	-0.18282	58.118	-140.531	1614.818	-1.3901	0.99268	-0.25928	-12.284	10.12491	22.6254	0.19189	-0.22607	-0.059082	NaN	NaN	NaN	NaN	NaN	NaN
1.546	-59.376	15.5220028	1295.76359	-1.5492	1.2133	-0.18164	24.848	-150.166	1605.441	-1.6289	1.1641	-0.2793	-7.956	43.49939	-18.2538	0.17969	-0.21826	-0.062012	NaN	NaN	NaN	NaN	NaN	NaN
1.548	-37.208	28.51	1268.9801	-1.5106	1.1815	-0.17158	37.755	-131.458	1613.968	-1.7573	1.2681	-0.29053	-17.079	32.3464	-2.158	0.15869	-0.19873	-0.061035	NaN	NaN	NaN	NaN	NaN	NaN
1.55	-58.32	33.903	1235.8384	-1.4805	1.1504	-0.16309	76.5855	-76.979	1585.9955	-2.043	1.4941	-0.31055	15.308	32.9191	7.735	0.15259	-0.1875	-0.061279	NaN	NaN	NaN	NaN	NaN	NaN
1.552	-60.853	34.5749	1213.4798	-1.4487	1.1212	-0.15674	40.541	-115.566	1588.45814	-2.2634	1.6623	-0.32178	4.073	22.4987	24.3612	0.14355	-0.1792	-0.068359	NaN	NaN	NaN	NaN	NaN	NaN
1.554	-44.841	40.3964	1197.267	-1.4239	1.0949	-0.15371	39.4185	-88.622	1580.4126	-2.4688	1.8145	-0.31494	20.039	57.3692	-2.275	0.14746	-0.17041	-0.078125	NaN	NaN	NaN	NaN	NaN	NaN
1.556	-56.297	53.2743	1178.2793	-1.4	1.0726	-0.15215	20.746	-64.888	1550.697	-2.6846	1.9746	-0.2959	16.569	36.1351	26.784	0.1499	-0.17236	-0.07959	NaN	NaN	NaN	NaN	NaN	NaN
1.558	-68.4257	60.6137	1187.9431	-1.372	1.0522	-0.14648	5.787	-83.831	1558.67	-2.75	2.0371	-0.28857	16.779	26.999	27.0213	0.15625	-0.17236	-0.081055	NaN	NaN	NaN	NaN	NaN	NaN
1.56	-64.71	59.596	1160.611	-1.3452	1.0337	-0.14355	2.407	-32.495	1550.6879	-2.8086	2.1152	-0.2793	8.184	2.153	41.795	0.15723	-0.17383	-0.086182	NaN	NaN	NaN	NaN	NaN	NaN
1.562	-48.524	53.356	1133.5678	-1.3182	1.0237	-0.13701	-36.181	-11.845	1517.718	-2.7456	2.1489	-0.27686	-8.225	35.4675	11.5321	0.15869	-0.17139	-0.089844	NaN	NaN	NaN	NaN	NaN	NaN
1.564	-79.5291	63.252	1108.373	-1.2938	1.0096	-0.13203	-46.707	3.86	1529.8959	-2.6812	2.147	-0.26904	-0.925999999999998	54.477	4.585	0.14502	-0.15869	-0.10156	NaN	NaN	NaN	NaN	NaN	NaN
1.566	-98.2195	78.1356	1116.467	-1.2722	1.0014	-0.13359	-44.6976	72.9912	1538.831	-2.5293	2.1211	-0.25293	12.239	62.7514	0.337	0.13184	-0.14941	-0.09668	NaN	NaN	NaN	NaN	NaN	NaN
1.568	-98.6426	69.472	1106.99502	-1.2509	0.9874	-0.13086	-95.674	41.1513	1550.3467	-2.4024	2.0869	-0.24194	-12.805	47.069	49.1454	0.10059	-0.11914	-0.10596	NaN	NaN	NaN	NaN	NaN	NaN
1.57	-111.368	85.713	1078.3959	-1.2339	0.979	-0.12354	-100.144	28.8749	1584.3789	-2.2905	2.0532	-0.23682	-35.733	54.11409	39.8953	0.058594	-0.078125	-0.10303	NaN	NaN	NaN	NaN	NaN	NaN
1.572	-93.4406	81.019	1054.50758	-1.2085	0.96572	-0.12324	-115.915	27.9954	1560.745	-2.1309	1.9902	-0.21875	-56.4662	50.004	49.388	0.035645	-0.0625	-0.1084	NaN	NaN	NaN	NaN	NaN	NaN
1.574	-91.278	93.416	1047.2148	-1.1844	0.94336	-0.1166	-117.692	-24.146	1543.33101	-2.0508	1.9414	-0.20898	-36.385	65.6024	50.347	-0.003418	-0.01416	-0.10938	NaN	NaN	NaN	NaN	NaN	NaN
1.576	-63.2622	97.985	1034.075299	-1.1613	0.92422	-0.11504	-66.142	14.818	1533.6822	-1.8882	1.8091	-0.20459	-83.562	40.968	71.4	-0.031983	0.012451	-0.10547	NaN	NaN	NaN	NaN	NaN	NaN
1.578	-53.2509	110.6961	991.482	-1.1315	0.89971	-0.11279	-121.806	-1.52	1509.6288	-1.7781	1.7072	-0.20703	-89.4207	48.0584	74.586	-0.058105	0.040039	-0.10498	NaN	NaN	NaN	NaN	NaN	NaN
1.58	-32.476	109.02	977.6109	-1.1035	0.87305	-0.10889	-91.6328	-10.75	1527.513	-1.6792	1.6157	-0.20654	-101.575	39.674	54.4069	-0.087891	0.071289	-0.10742	NaN	NaN	NaN	NaN	NaN	NaN
1.582	-15.081	105.86	968.1348	-1.0756	0.84199	-0.1085	-48.6834	39.277	1505.3545	-1.5659	1.5083	-0.21143	-74.63825	51.3801	41.9387	-0.10254	0.086426	-0.10889	NaN	NaN	NaN	NaN	NaN	NaN
1.584	16.416	105.752	953.2369	-1.0492	0.81758	-0.10703	-99.306	12.864	1498.2509	-1.5259	1.4634	-0.21533	-79.945	16.013	67.746	-0.12354	0.11475	-0.1123	NaN	NaN	NaN	NaN	NaN	NaN
1.586	21.895	115.0863	919.39715	-1.0222	0.79531	-0.10937	-24.813	44.106	1505.65	-1.4512	1.3828	-0.20605	-86.3934	-31.3058	125.946	-0.13379	0.13037	-0.12061	NaN	NaN	NaN	NaN	NaN	NaN
1.588	2.236	123.404	892.1456	-0.99949	0.77646	-0.10713	-19.635	71.6362	1462.146	-1.4205	1.3355	-0.19971	-120.0739	-53.361	151.963	-0.14209	0.13916	-0.12646	NaN	NaN	NaN	NaN	NaN	NaN
1.59	7.894	139.635	888.4591	-0.98047	0.75391	-0.10645	-41.199	68.9069	1436.7498	-1.4004	1.3008	-0.19629	-52.046	11.224	196.231	-0.1499	0.16211	-0.13086	NaN	NaN	NaN	NaN	NaN	NaN
1.592	12.845	138.786	867.2025	-0.96279	0.74092	-0.1041	3.527	138.641	1405.2578	-1.3804	1.2524	-0.18848	-41.974	43.99883	323.477	-0.15527	0.1665	-0.14258	NaN	NaN	NaN	NaN	NaN	NaN
1.594	21.849	130.875	843.75935	-0.94365	0.72822	-0.10732	-24.5325	141.4	1378.6482	-1.373	1.2285	-0.18652	-32.126	38.157	492.2778	-0.16504	0.18604	-0.15576	NaN	NaN	NaN	NaN	NaN	NaN
1.596	9.637	134.292	820.5943	-0.9249	0.71025	-0.1042	6.353	119.651	1382.521	-1.3647	1.1831	-0.18506	-62.9452	14.0287	655.539	-0.18653	0.20215	-0.16504	NaN	NaN	NaN	NaN	NaN	NaN
1.598	15.135	126.49	802.6672	-0.90508	0.69111	-0.10166	53.6397	144.716	1344.0818	-1.3581	1.1526	-0.18555	27.013	4.104	799.777	-0.22559	0.22119	-0.17725	NaN	NaN	NaN	NaN	NaN	NaN
1.6	31.975	126.8743	773.4253	-0.88232	0.67236	-0.10156	25.323	128.9326	1311.0366	-1.3433	1.1235	-0.18701	67.76	2.0836	981.81	-0.31787	0.24463	-0.19824	NaN	NaN	NaN	NaN	NaN	NaN
1.602	25.3827	141.82416	734.1549	-0.85518	0.65478	-0.10117	85.242	156.8893	1304.629	-1.3145	1.0859	-0.18896	71.768	-13.216	1230.069	-0.38037	0.2583	-0.2085	NaN	NaN	NaN	NaN	NaN	NaN
1.604	13.228	140.462	728.1151	-0.83272	0.63369	-0.10127	97.999	176.98	1272.735	-1.2983	1.0737	-0.18896	41.15163	-49.891	1406.9139	-0.54443	0.30127	-0.21924	NaN	NaN	NaN	NaN	NaN	NaN
1.606	35.9517	138.2133	694.8855	-0.80654	0.61377	-0.10049	54.091	135.159	1238.0445	-1.2715	1.0488	-0.18994	10.473	-57.409	1500.25655	-0.71778	0.35278	-0.22315	NaN	NaN	NaN	NaN	NaN	NaN
1.608	18.749	131.0474	679.955	-0.78047	0.59141	-0.096289	70.137	138.0964	1216.9656	-1.2566	1.0285	-0.19067	2.596	-65.683	1514.7166	-0.93896	0.42334	-0.21387	NaN	NaN	NaN	NaN	NaN	NaN
1.61	-21.18	139.4419	673.638	-0.75537	0.56885	-0.095215	31.6883	123.9977	1194.3656	-1.2412	1.0156	-0.19385	-38.214	-120.773	1580.222	-1.3145	0.5542	-0.20703	NaN	NaN	NaN	NaN	NaN	NaN
1.612	-32.024	134.9486	662.8882	-0.72705	0.54365	-0.096777	13.722	128.3134	1197.501	-1.2168	0.99609	-0.19238	-99.968	-135.074	1614.362	-1.5293	0.63477	-0.19238	NaN	NaN	NaN	NaN	NaN	NaN
1.614	-25.583	144.641	634.4776	-0.70107	0.51963	-0.095899	25.70313	172.292	1171.1174	-1.2085	0.98584	-0.17822	-114.26	-187.797	1597.585	-1.9995	0.82959	-0.125	NaN	NaN	NaN	NaN	NaN	NaN
1.616	-56.2455	141.692	594.9807	-0.66826	0.49463	-0.096289	-21.781	172.35218	1130.8499	-1.1855	0.97461	-0.19141	-129.998	-220.215	1482.9	-2.3845	1.009	-0.061524	NaN	NaN	NaN	NaN	NaN	NaN
1.618	-67.61273	138.94	563.5656	-0.63926	0.46699	-0.10468	-3.3042	191.6069	1104.7828	-1.1677	0.96118	-0.1831	-124.455	-245.849	1442.424	-2.7964	1.2388	-0.013184	NaN	NaN	NaN	NaN	NaN	NaN
1.62	-77.536	128.863	541.5994	-0.61182	0.44385	-0.094238	-6.4736	219.694	1070.776	-1.1519	0.94482	-0.18115	-149.824	-241.342	1398.463	-3.3374	1.6255	-0.00097656	NaN	NaN	NaN	NaN	NaN	NaN
1.622	-63.9781	131.717	523.09947	-0.57402	0.41553	-0.098145	-42.307	206.8639	1057.828	-1.1245	0.91846	-0.18066	-160.529	-267.67	1362.788	-3.5249	1.8384	0.0073242	NaN	NaN	NaN	NaN	NaN	NaN
1.624	-69.127	135.2228	477.786	-0.54043	0.38662	-0.09873	6.019	217.621	1033.5491	-1.1074	0.89648	-0.17871	-142.777	-190.498	1305.7138	-3.6797	2.2129	0.035645	NaN	NaN	NaN	NaN	NaN	NaN
1.626	-57.5395	121.85	479.599	-0.50801	0.36045	-0.10303	-48.4879	210.977	976.988	-1.0645	0.86719	-0.1709	-174.6374	-128.481	1305.1796	-3.5416	2.3247	-0.005371	NaN	NaN	NaN	NaN	NaN	NaN
1.628	-58.7713	125.729	466.24	-0.47695	0.33291	-0.10596	-56.132	195.7387	947.0869	-1.0305	0.83715	-0.16504	-224.956	-94.31	1311.9969	-3.2109	2.248	-0.12891	NaN	NaN	NaN	NaN	NaN	NaN
1.63	-36.709	132.3425	435.9813	-0.44238	0.30762	-0.10986	-28.999303	229.175	913.35	-1.0039	0.80859	-0.16357	-255.786	-118.78	1343.211	-2.4546	1.8462	-0.35498	NaN	NaN	NaN	NaN	NaN	NaN
1.632	-37.861	136.55723	392.4026	-0.40977	0.28281	-0.11416	-77.489	224.491	876.008	-0.9585	0.77783	-0.16553	-253.345	-145.388	1324.433	-2.0508	1.584	-0.43945	NaN	NaN	NaN	NaN	NaN	NaN
1.634	-20.41	127.8935	376.2655	-0.37881	0.2545	-0.11729	-34.70109	215.433	866.9392	-0.93896	0.76025	-0.16162	-255.886	-147.753	1325.609	-1.3926	1.0625	-0.54834	NaN	NaN	NaN	NaN	NaN	NaN
1.636	-16.759	129.699	389.626	-0.3499	0.23614	-0.11846	-62.412	227.498	831.6524	-0.89941	0.72852	-0.1582	-242.892	-171.56	1329.713	-1.0964	0.76098	-0.60938	NaN	NaN	NaN	NaN	NaN	NaN
1.638	-30.5	128.277	359.637	-0.32129	0.21582	-0.11865	-64.778	224.061	810.221	-0.87158	0.70996	-0.15161	-249.492	-209.079	1368.835	-0.92139	0.53613	-0.64502	NaN	NaN	NaN	NaN	NaN	NaN
1.64	-30.149	122.2354	329.73	-0.2998	0.19922	-0.12256	20.257	244.517	805.657	-0.83887	0.69385	-0.14795	-229.65	-242.0096	1385.904	-0.83203	0.3877	-0.68555	NaN	NaN	NaN	NaN	NaN	NaN
1.642	-22.508	112.9332	298.309	-0.27119	0.18486	-0.12354	-17.4929	244.003	760.516	-0.8042	0.66797	-0.14307	-185.77	-293.942	1426.539	-0.8125	0.35938	-0.7168	NaN	NaN	NaN	NaN	NaN	NaN
1.644	-6.635	108.0032	282.1373	-0.24981	0.16806	-0.12637	-2.769	199.4652	729.665	-0.78467	0.65869	-0.14453	-118.61	-357.352	1474.407	-0.73975	0.34912	-0.74951	NaN	NaN	NaN	NaN	NaN	NaN
1.646	5.099	116.4239	257.1498	-0.22207	0.15439	-0.12754	60.121	202.9166	693.1803	-0.73389	0.62939	-0.14453	-110.4274	-387.3	1555.93	-0.66504	0.36231	-0.73047	NaN	NaN	NaN	NaN	NaN	NaN
1.648	14.12	102.03089	238.6029	-0.19912	0.14258	-0.12793	18.4362	187.952	656.516	-0.69824	0.60742	-0.14624	-46.397	-435.68	1621.297	-0.59326	0.38184	-0.70459	NaN	NaN	NaN	NaN	NaN	NaN
1.65	27.198	98.786	220.0982	-0.17725	0.13477	-0.12939	74.315	171.592	641.828	-0.65967	0.58057	-0.14355	-79.332	-393.356	1633.376	-0.53809	0.38916	-0.65918	NaN	NaN	NaN	NaN	NaN	NaN
1.652	16.47	86.37682	209.8514	-0.15342	0.1292	-0.12725	59.387	184.422	577.6066	-0.60303	0.54346	-0.14063	-62.758	-350.059	1628.676	-0.5332	0.38477	-0.64453	NaN	NaN	NaN	NaN	NaN	NaN
1.654	11.381	89.5089	197.0368	-0.13389	0.12158	-0.12998	28.102	167.685	530.043	-0.57275	0.52539	-0.13965	1.222	-291.026	1623.3043	-0.59326	0.39893	-0.59424	NaN	NaN	NaN	NaN	NaN	NaN
1.656	8.101	82.6451	201.0162	-0.10811	0.1169	-0.12998	77.2825	171.399	487.108	-0.5127	0.49219	-0.13867	18.302	-279.485	1673.192	-0.71338	0.43652	-0.55859	NaN	NaN	NaN	NaN	NaN	NaN
1.658	0.682000000000002	85.4548	193.4925	-0.090723	0.11709	-0.12549	30.978	193.736	424.2966	-0.46973	0.46582	-0.13427	29.71	-240.274	1690.229	-0.89404	0.50244	-0.5249	NaN	NaN	NaN	NaN	NaN	NaN
1.66	-10.436	84.458	165.3327	-0.073242	0.10986	-0.12646	51.8874	175.5695	418.4088	-0.42188	0.43652	-0.13281	25.765	-233.414	1680.5434	-1.2188	0.63867	-0.48828	NaN	NaN	NaN	NaN	NaN	NaN
1.662	-42.234	93.058	145.5999	-0.059863	0.10635	-0.1249	67.602	173.301	396.567	-0.35547	0.39258	-0.13037	45.164	-168.167	1677.424	-1.3921	0.73096	-0.46826	NaN	NaN	NaN	NaN	NaN	NaN
1.664	-35.053	81.375	139.8856	-0.04336	0.095899	-0.11846	26.8327	161.9003	366.9922	-0.32617	0.3667	-0.12793	74.552	-157.742	1704.6267	-1.7266	0.9375	-0.44238	NaN	NaN	NaN	NaN	NaN	NaN
1.666	-46.1783	73.5154	146.2317	-0.032031	0.089648	-0.1126	43.1056	133.4109	365.756	-0.2666	0.32031	-0.12695	55.156	-108.083	1721.821	-1.9482	1.1328	-0.45288	NaN	NaN	NaN	NaN	NaN	NaN
1.668	-54.3755	73.6539	115.53375	-0.020996	0.082031	-0.10752	14.692	160.197	308.4602	-0.2229	0.28589	-0.12671	74.997	-135.485	1725.5057	-2.1328	1.3516	-0.49756	NaN	NaN	NaN	NaN	NaN	NaN
1.67	-59.7264	60.5845	96.855	-0.0068359	0.069824	-0.104	-2.067	148.645	264.6829	-0.18311	0.25244	-0.12451	57.053	-123.994	1703.854	-2.3066	1.5957	-0.58984	NaN	NaN	NaN	NaN	NaN	NaN
1.672	-53.451	45.208	98.421	0.0017578	0.05791	-0.10645	7.813	130.664	233.7081	-0.13428	0.21338	-0.12549	36.868	-163.323	1747.307	-2.3589	1.6909	-0.64111	NaN	NaN	NaN	NaN	NaN	NaN
1.674	-63.5972	45.314	104.9653	0.013867	0.04961	-0.10244	-54.2237	149.3	181.387	-0.11523	0.19141	-0.12402	-8.711	-133.719	1809.2255	-2.4434	1.8174	-0.7002	NaN	NaN	NaN	NaN	NaN	NaN
1.676	-53.078	57.932	101.24606	0.024414	0.035547	-0.10244	-62.7919	104.333	197.5686	-0.084473	0.15137	-0.12451	-49.0757	-155.124	1855.016	-2.499	1.876	-0.7124	NaN	NaN	NaN	NaN	NaN	NaN
1.678	-51.7333	63.7854	81.6981	0.031641	0.025488	-0.095605	-25.745	82.601	180.098	-0.065918	0.12939	-0.1228	-51.516	-110.5254	1842.779	-2.5586	1.9121	-0.70605	NaN	NaN	NaN	NaN	NaN	NaN
1.68	-64.49044	55.4436	85.3536	0.037598	0.01709	-0.091309	-105.37	73.787	163.409	-0.051758	0.10791	-0.12256	-79.0765	-147.252	1859.051	-2.6558	1.9399	-0.69482	NaN	NaN	NaN	NaN	NaN	NaN
1.682	-63.4605	59.781	95.0653	0.045215	0.0095703	-0.0875	-57.0447	40.989	178.03743	-0.036621	0.083008	-0.12256	-74.3892	-136.957	1842.6629	-2.7026	1.9556	-0.69287	NaN	NaN	NaN	NaN	NaN	NaN
1.684	-61.453	68.5485	69.8192	0.048242	0.0047851	-0.080078	-54.9667	80.1082	132.9713	-0.028809	0.071289	-0.12354	-92.845	-164.099	1857.499	-2.7715	1.9473	-0.69629	NaN	NaN	NaN	NaN	NaN	NaN
1.686	-70.2933	66.579	67.4804	0.046289	0.0020507	-0.074609	-91.147	92.5356	116.13056	-0.022461	0.053711	-0.12354	-98.588	-77.906	1822.832	-2.7818	1.9106	-0.70947	NaN	NaN	NaN	NaN	NaN	NaN
1.688	-54.2712	65.912	70.3318	0.043359	-0.0027344	-0.062598	-36.3903	77.759	113.948	-0.01709	0.042725	-0.12476	-96.97	-49.606	1789.897	-2.7593	1.8657	-0.72217	NaN	NaN	NaN	NaN	NaN	NaN
1.69	-40.962	61.442	72.1334	0.036133	-0.0024414	-0.056152	-97.039	102.631	74.846	-0.010742	0.03418	-0.11475	-102.1	25.1981	1768.509	-2.7246	1.8613	-0.73096	NaN	NaN	NaN	NaN	NaN	NaN
1.692	-29.852	52.918	55.3514	0.030567	-0.0047851	-0.044238	-56.112	63.114	85.093	-0.0019531	0.020508	-0.12305	-113.34	16.38927	1791.033	-2.728	1.8931	-0.73975	NaN	NaN	NaN	NaN	NaN	NaN
1.694	-31.253	37.42607	46.8139	0.022168	-0.010742	-0.038086	-21.95	61.1348	73.161	-0.00097656	0.017578	-0.12207	-86.1083	79.3072	1759.88	-2.7666	2.0332	-0.74609	NaN	NaN	NaN	NaN	NaN	NaN
1.696	8.097	43.31181	50.9701	0.0081055	-0.013086	-0.026758	-56.2876	70.133	45.013	0.003418	0.0053711	-0.12061	-69.7196	79.678	1751.015	-2.7644	2.1292	-0.70971	NaN	NaN	NaN	NaN	NaN	NaN
1.698	3.871	49.2796	46.2548	-0.0018555	-0.013867	-0.016504	11.148	36.658	54.214	0.0046387	-0.001709	-0.11939	-63.3597	122.685	1729.1676	-2.6909	2.1489	-0.65186	NaN	NaN	NaN	NaN	NaN	NaN
1.7	-2.419	43.2472	45.8003	-0.010254	-0.016113	-0.0092773	-5.442	71.49	33.015	0.0078125	-0.0083008	-0.11279	-94.012	96.075	1761.8788	-2.5059	2.0195	-0.62158	NaN	NaN	NaN	NaN	NaN	NaN
1.702	10.302	38.2406	33.0626	-0.020606	-0.018067	-0.0033203	-10.783	71.467	31.8072	0.0053711	-0.019043	-0.1084	-86.3186	121.976	1749.6656	-2.3926	1.9121	-0.62549	NaN	NaN	NaN	NaN	NaN	NaN
1.704	-9.27	37.5157	46.27358	-0.025098	-0.020899	-0.00039058	47.447	47.4716	34.26	0.003418	-0.022949	-0.10449	-57.7925	71.639	1742.749	-2.1929	1.7056	-0.64795	NaN	NaN	NaN	NaN	NaN	NaN
1.706	7.216	39.8491	50.1438	-0.030567	-0.026758	0.0074219	-3.266	63.94	3.6305	-0.0058594	-0.033203	-0.1001	7.084	95.941	1701.393	-2.0825	1.5757	-0.65942	NaN	NaN	NaN	NaN	NaN	NaN
1.708	-7.411	35.1477	49.63553	-0.034473	-0.029004	0.011621	16.438	17.9967	34.712	-0.015625	-0.041504	-0.094238	8.86499999999999	53.3529	1727.51545	-2.0098	1.4668	-0.66016	NaN	NaN	NaN	NaN	NaN	NaN
1.71	-10.245	26.6115	50.3775	-0.037109	-0.033691	0.014648	34.143	27.6191	37.0574	-0.020508	-0.04248	-0.096191	12.05	84.725	1718.56	-1.9619	1.3652	-0.63672	NaN	NaN	NaN	NaN	NaN	NaN
1.712	-30.361	36.532	52.3138	-0.035938	-0.041895	0.014941	8.64	45.7123	29.2034	-0.02832	-0.050293	-0.085449	11.891	65.8	1709.059	-1.9531	1.3301	-0.61523	NaN	NaN	NaN	NaN	NaN	NaN
1.714	-15.81	46.044	24.8196	-0.033496	-0.051269	0.016406	69.69647	5.701	38.294	-0.02832	-0.050781	-0.086914	40.114	106.534	1660.721	-1.9585	1.2935	-0.5874	NaN	NaN	NaN	NaN	NaN	NaN
1.716	-30.672	37.9084	25.3587	-0.031152	-0.060254	0.015234	22.091	38.4347	23.1552	-0.023926	-0.057617	-0.068359	27.719	66.663	1662.249	-1.9606	1.2834	-0.56665	NaN	NaN	NaN	NaN	NaN	NaN
1.718	-23.946	31.3145	44.2648	-0.024121	-0.070703	0.010156	-0.594000000000001	25.1199	26.016	-0.017578	-0.051758	-0.070801	68.925	81.362	1637.823	-1.9521	1.2793	-0.56445	NaN	NaN	NaN	NaN	NaN	NaN
1.72	-35.825	27.8343	49.7492	-0.017578	-0.08252	0.0083008	30.651	12.3044	31.5745	-0.0097656	-0.053711	-0.063965	39.382	71.277	1611.577	-1.9004	1.2734	-0.55273	NaN	NaN	NaN	NaN	NaN	NaN
1.722	-40.978	30.4184	32.52016	-0.010351	-0.088281	0.0029297	-24.846	69.76	9.4883	0.0029297	-0.058594	-0.055176	13.207	152.689	1536.327	-1.8435	1.2649	-0.55297	NaN	NaN	NaN	NaN	NaN	NaN
1.724	-53.1994	25.7431	24.4954	-0.0038086	-0.095118	-0.0016601	-9.193	35.654	27.61	0.018311	-0.067627	-0.048828	-37.444	171.337	1481.177	-1.7729	1.2515	-0.54541	NaN	NaN	NaN	NaN	NaN	NaN
1.726	-63.1536	22.3741	44.205828	0.0020508	-0.10566	-0.0079102	0.144999999999996	33.3841	41.69022	0.029785	-0.08252	-0.044434	-50.141	224.703	1427.308	-1.6777	1.2227	-0.52734	NaN	NaN	NaN	NaN	NaN	NaN
1.728	-72.2587	30.9527	43.9612	0.0084961	-0.11416	-0.01084	-86.392	49.66098	31.7797	0.055664	-0.094727	-0.039063	-73.805	212.415	1418.1797	-1.6323	1.1997	-0.51514	NaN	NaN	NaN	NaN	NaN	NaN
1.73	-67.6546	25.6355	38.4172	0.013184	-0.11816	-0.02002	-56.3548	7.954	46.33978	0.066895	-0.10205	-0.035645	-71.394	245.309	1349.605	-1.564	1.1587	-0.49561	NaN	NaN	NaN	NaN	NaN	NaN
1.732	-75.85764	17.5852	28.76954	0.012207	-0.12217	-0.024024	-86.128	43.0597	30.337	0.09375	-0.11914	-0.026855	-88.156	206.236	1314.697	-1.5164	1.1175	-0.47339	NaN	NaN	NaN	NaN	NaN	NaN
1.734	-81.094	17.14946	30.4797	0.014257	-0.12558	-0.02959	-89.575	28.54	36.667	0.10864	-0.12842	-0.022705	-156.952	225.1101	1264.093	-1.4761	1.0747	-0.44873	NaN	NaN	NaN	NaN	NaN	NaN
1.736	-59.5674	22.1552	47.8548	0.013477	-0.12558	-0.031543	-74.5873	17.0369	48.476	0.11768	-0.14063	-0.017578	-196.358	199.0765	1250.3273	-1.4155	1.0181	-0.42529	NaN	NaN	NaN	NaN	NaN	NaN
1.738	-56.9895	29.17505	44.48123	0.0083008	-0.12227	-0.03584	-110.734	64.402	9.264	0.12988	-0.15088	-0.01416	-170.438	234.111	1201.7901	-1.3755	0.99268	-0.40967	NaN	NaN	NaN	NaN	NaN	NaN
1.74	-60.7684	28.9028	39.6086	0.010254	-0.11621	-0.042969	-69.8008	20.9757	16.3473	0.13672	-0.15869	-0.0068359	-172.953	222.3974	1118.718	-1.311	0.93799	-0.39502	NaN	NaN	NaN	NaN	NaN	NaN
1.742	-34.848	29.2845	36.0887	0.0077148	-0.11621	-0.046191	-53.5626	10.0015	38.9865	0.14209	-0.17236	-0.00097656	-151.4527	257.45	1060.979	-1.2583	0.90625	-0.37256	NaN	NaN	NaN	NaN	NaN	NaN
1.744	-32.51	26.0444	34.0994	0.0072265	-0.10947	-0.05791	-110.683	15.264	39.7891	0.1416	-0.18457	0.0073243	-195.0356	243.8833	1033.679	-1.1992	0.875	-0.34961	NaN	NaN	NaN	NaN	NaN	NaN
1.746	-30.909	11.7645	54.7329	0.0095703	-0.10439	-0.062207	-49.0677	-26.649	74.252	0.14355	-0.18848	0.0092773	-189.9957	274.9169	1025.042	-1.1167	0.82666	-0.31738	NaN	NaN	NaN	NaN	NaN	NaN
1.748	-18.285	-13.140267	77.8252	0.010937	-0.10039	-0.07002	-53.5958	28.527	38.657	0.1416	-0.19336	0.012695	-221.045	258.4161	967.2468	-1.0737	0.79932	-0.30127	NaN	NaN	NaN	NaN	NaN	NaN
1.75	-14.181	-10.2955	92.277	0.015137	-0.09375	-0.07666	-48.8283	17.851	23.3581	0.14502	-0.19482	0.014648	-203.3	290.8049	945.542	-0.98438	0.74023	-0.27246	NaN	NaN	NaN	NaN	NaN	NaN
1.752	5.485	3.297	107.63321	0.022949	-0.090918	-0.089453	-9.411	1.10218	35.5683	0.14063	-0.19775	0.018066	-178.963	231.6025	903.762	-0.91919	0.68969	-0.24975	NaN	NaN	NaN	NaN	NaN	NaN
1.754	-10.922	22.0781	142.0998	0.025977	-0.085156	-0.10059	-42.993	46.134	15.904	0.13941	-0.20044	0.020508	-142.3751	249.3904	871.6038	-0.85303	0.63721	-0.22754	NaN	NaN	NaN	NaN	NaN	NaN
1.756	16.14	19.0329	208.963	0.031836	-0.087109	-0.10879	0.0380000000000003	5.3485	37.439	0.13623	-0.20166	0.013672	-125.954	251.69	805.58	-0.76563	0.57031	-0.1958	NaN	NaN	NaN	NaN	NaN	NaN
1.758	28.5692	14.4592	255.606	0.036621	-0.079785	-0.11611	28.604	14.329	16.4575	0.12939	-0.19971	0.018555	-102.207	318.537	737.005	-0.72656	0.53125	-0.18262	NaN	NaN	NaN	NaN	NaN	NaN
1.76	87.373	16.1959	308.414	0.041504	-0.081543	-0.12988	-12.809	14.0093	11.198	0.13379	-0.19971	0.011719	-79.535	285.433	684.7044	-0.646	0.4751	-0.14941	NaN	NaN	NaN	NaN	NaN	NaN
1.762	64.5986	14.0192	399.8135	0.039746	-0.072559	-0.13857	36.338	-29.227	45.3195	0.12695	-0.19775	0.0068359	-63.712	284.737	658.582	-0.59155	0.42798	-0.13086	NaN	NaN	NaN	NaN	NaN	NaN
1.764	60.029	-5.0826	512.2898	0.035059	-0.071387	-0.15439	21.687	27.6402	27.546	0.12354	-0.19482	0.0073242	-69.577	231.0714	613.7504	-0.53369	0.38818	-0.11279	NaN	NaN	NaN	NaN	NaN	NaN
1.766	37.8319	-0.87283	579.0821	0.026074	-0.063965	-0.17158	28.123	36.2127	5.0015	0.12549	-0.18799	0.00097656	-5.91199999999999	262.6523	583.61609	-0.45752	0.33838	-0.081543	NaN	NaN	NaN	NaN	NaN	NaN
1.768	25.669	6.0555	623.7122	0.011328	-0.05332	-0.18369	63.539	17.8269	6.779	0.12305	-0.18506	-0.0097656	9.369	217.7789	545.306	-0.41504	0.31055	-0.075195	NaN	NaN	NaN	NaN	NaN	NaN
1.77	-7.815	0.0129999999999981	689.939	-0.012695	-0.039551	-0.18555	-1.962	55.771	-1.531	0.12158	-0.17871	-0.016602	-17.411	231.879	539.83	-0.33594	0.26025	-0.05127	NaN	NaN	NaN	NaN	NaN	NaN
1.772	-55.061	-18.337	783.0354	-0.04375	-0.025	-0.20713	2.281	-2.2578	33.448	0.11865	-0.17871	-0.02832	-21.078	198.03	483.276	-0.27319	0.22265	-0.035644	NaN	NaN	NaN	NaN	NaN	NaN
1.774	-49.659	-1.308	844.605	-0.091309	-0.0064453	-0.22246	21.647	9.9426	30.1684	0.11279	-0.17309	-0.033692	-12.955	204.8428	445.026	-0.21143	0.18994	-0.016602	NaN	NaN	NaN	NaN	NaN	NaN
1.776	-123.926	12.9362	882.095	-0.14639	0.017383	-0.24004	-24.825	39.314	8.33181	0.11328	-0.17285	-0.040527	9.691	176.466775	377.6401	-0.12451	0.14697	-0.0024414	NaN	NaN	NaN	NaN	NaN	NaN
1.778	-158.006	21.239	923.366	-0.22285	0.046972	-0.25683	-6.223	-16.9325	24.6519	0.10498	-0.17188	-0.050781	0.146999999999998	188.037	374.8471	-0.084473	0.12451	0.013184	NaN	NaN	NaN	NaN	NaN	NaN
1.78	-154.7511	-4.771	946.475	-0.30615	0.076172	-0.27197	-39.767	24.641	23.117	0.10205	-0.16797	-0.054688	-0.199000000000005	134.9201	340.546	-0.01709	0.087402	0.032715	NaN	NaN	NaN	NaN	NaN	NaN
1.782	-153.2593	-24.967	949.5835	-0.40781	0.11904	-0.28379	-65.97876	26.3701	15.2771	0.092773	-0.16455	-0.063965	-12.632	157.6196	312.25	0.023438	0.059082	0.046143	NaN	NaN	NaN	NaN	NaN	NaN
1.784	-128.4597	-18.942	942.459	-0.53086	0.17334	-0.29414	-26.021	21.075	7.1822	0.085938	-0.15894	-0.070556	-24.365	123.674	224.3721	0.061523	0.033691	0.05957	NaN	NaN	NaN	NaN	NaN	NaN
1.786	-120.1539	-19.3626	981.476	-0.67266	0.24287	-0.29922	-81.85	66.481	-1.414	0.07959	-0.15479	-0.075195	-53.4872	123.252	208.75409	0.096191	0.0063477	0.07666	NaN	NaN	NaN	NaN	NaN	NaN
1.788	-112.507	-1.9125	1000.025	-0.83965	0.32382	-0.29727	-70.84694	7.235	34.5354	0.06543	-0.14551	-0.085938	-75.253	68.799	172.002	0.10498	-0.0043945	0.080078	NaN	NaN	NaN	NaN	NaN	NaN
1.79	-144.131	14.1629	997.77842	-1.0229	0.42236	-0.28906	-73.2704	22.6014	34.2066	0.058105	-0.13477	-0.086426	-76.095	99.165	158.023	0.11621	-0.026855	0.10156	NaN	NaN	NaN	NaN	NaN	NaN
1.792	-145.805	9.715	969.187	-1.2322	0.52715	-0.28545	-115.386	59.6926	7.5032	0.037109	-0.12158	-0.091797	-71.62	106.614	109.211	0.11182	-0.037842	0.11109	NaN	NaN	NaN	NaN	NaN	NaN
1.794	-142.38838	-12.0417	955.629	-1.46	0.64853	-0.26846	-50.0146	22.4244	19.7408	0.026367	-0.1145	-0.094238	-96.148	147.845	71.408	0.10449	-0.046387	0.12305	NaN	NaN	NaN	NaN	NaN	NaN
1.796	-128.818	-34.54341	968.6089	-1.6878	0.78017	-0.24229	-85.8	56.539	21.5936	0.012207	-0.10742	-0.10156	-121.504	125.5643	39.128	0.083984	-0.054199	0.14453	NaN	NaN	NaN	NaN	NaN	NaN
1.798	-144.1844	-31.2644	968.96159	-1.9064	0.92871	-0.21065	-80.1577	34.29484	42.8432	-0.0019531	-0.098633	-0.097656	-160.008	109.338	73.154	0.071289	-0.054688	0.15283	NaN	NaN	NaN	NaN	NaN	NaN
1.8	-164.155	-43.901	963.967	-2.1152	1.0918	-0.17676	-43.445	8.40194	57.8205	-0.01123	-0.087402	-0.10254	-92.1027	71.9674	36.712	0.033691	-0.055176	0.16455	NaN	NaN	NaN	NaN	NaN	NaN
1.802	-131.405	-54.562	965.59917137	-2.2924	1.2681	-0.15576	-61.2949	44.388	43.142	-0.025391	-0.081543	-0.10303	-96.8653	65.2554	32.645	0.01001	-0.051025	0.17261	NaN	NaN	NaN	NaN	NaN	NaN
1.804	-103.617	-75.6643	980.7344	-2.4319	1.4454	-0.15391	-45.272	-31.8382	78.766	-0.03711	-0.074707	-0.10547	-77.3083	54.39436	22.622	-0.0097656	-0.04248	0.17822	NaN	NaN	NaN	NaN	NaN	NaN
1.806	-61.6687	-85.5835	978.0874	-2.5026	1.6115	-0.17891	-40.585	-33.369	115.00578	-0.04248	-0.072754	-0.11426	-102.221	44.275	31.989	-0.040527	-0.02832	0.18799	NaN	NaN	NaN	NaN	NaN	NaN
1.808	-40.421	-103.5301	986.918	-2.4895	1.7164	-0.21113	-32.407	-11.045	118.9378	-0.056641	-0.065918	-0.12402	-80.51138	41.5913	2.7601	-0.055664	-0.023926	0.19092	NaN	NaN	NaN	NaN	NaN	NaN
1.81	3.796	-119.304	1016.649	-2.3882	1.7349	-0.25439	25.642	-60.9224	176.045	-0.058594	-0.06543	-0.13281	-72.081	38.5429	-2.103	-0.085449	-0.012695	0.19922	NaN	NaN	NaN	NaN	NaN	NaN
1.812	23.674	-127.9705	1043.894	-2.2108	1.6673	-0.29287	-5.461	-12.494	251.677	-0.066895	-0.051758	-0.13574	-30.804	50.5599	-13.7253	-0.10864	-0.0029297	0.20117	NaN	NaN	NaN	NaN	NaN	NaN
1.814	14.842	-119.9068	1056.1181	-1.9995	1.5435	-0.32412	19.1455	-20.474	370.289	-0.089111	-0.031006	-0.13916	-27.531	36.8551	32.2274	-0.12988	0.0043945	0.19873	NaN	NaN	NaN	NaN	NaN	NaN
1.816	43.2178	-119.8758	1059.5901	-1.7839	1.3856	-0.34483	69.072	-16.6532	550.179	-0.12695	-0.011719	-0.14355	-2.507	36.2125	44.4598	-0.16943	0.0058594	0.20068	NaN	NaN	NaN	NaN	NaN	NaN
1.818	57.4777	-132.97964	1078.47833	-1.6024	1.2376	-0.36534	47.927	69.8114	677.766	-0.19531	0.0078125	-0.16748	14.075	33.695	70.40885	-0.19238	0.010254	0.18945	NaN	NaN	NaN	NaN	NaN	NaN
1.82	30.531	-129.20293	1087.321	-1.4609	1.1094	-0.38086	57.813	17.8613	817.028	-0.23291	0.023926	-0.17725	21.727	68.058	55.7179	-0.23438	0.018066	0.18506	NaN	NaN	NaN	NaN	NaN	NaN
1.822	-8.303	-115.2	1108.5846	-1.3626	1.0116	-0.37568	83.786	17.5191	945.21	-0.33398	0.069336	-0.19678	14.04	36.539	74.709	-0.26538	0.026856	0.17749	NaN	NaN	NaN	NaN	NaN	NaN
1.824	2.186	-107.881	1141.7622	-1.284	0.93789	-0.39092	26.926	-5.165	1055.8059	-0.43164	0.11988	-0.21021	45.317	44.318	74.925	-0.29297	0.03125	0.1748	NaN	NaN	NaN	NaN	NaN	NaN
1.826	30.348	-94.46	1165.593	-1.2039	0.8789	-0.41201	24.52	-59.881	1187.418	-0.55859	0.18262	-0.2168	45.395	23.39935	68.672	-0.32422	0.037109	0.17041	NaN	NaN	NaN	NaN	NaN	NaN
1.828	16.651	-98.988	1190.9215	-1.0952	0.82334	-0.43008	-28.735	4.61	1260.179	-0.77295	0.29297	-0.22998	29.502	73.049	33.385	-0.33594	0.042969	0.16602	NaN	NaN	NaN	NaN	NaN	NaN
1.83	27.54	-93.822	1193.753	-0.97803	0.77002	-0.43994	-60.794	-34.232	1288.167	-0.90381	0.36426	-0.24023	22.948	46.355	36.737	-0.35107	0.056152	0.16016	NaN	NaN	NaN	NaN	NaN	NaN
1.832	13.464	-106.284	1226.328	-0.85723	0.71015	-0.44736	-59.421	-114.628	1310.063	-1.1953	0.52246	-0.25195	24.947	60.134	43.6711	-0.35645	0.072266	0.15551	NaN	NaN	NaN	NaN	NaN	NaN
1.834	8.121	-103.141	1260.1549	-0.75312	0.65313	-0.44805	-147.909	-124.873	1310.6298	-1.448	0.66285	-0.24634	-6.004	1.46	50.7484	-0.35986	0.088867	0.16113	NaN	NaN	NaN	NaN	NaN	NaN
1.836	-17.283	-114.897	1285.0235	-0.67227	0.59726	-0.43984	-167.486	-197.726	1345.284	-1.7285	0.8125	-0.23438	3.204	19.431	36.1097	-0.35693	0.10742	0.16064	NaN	NaN	NaN	NaN	NaN	NaN
1.838	-35.8663	-120.393	1301.4415	-0.62158	0.55332	-0.42822	-148.349	-197.109	1312.088	-2.1445	1.0547	-0.19434	-11.551	-22.1444	27.7197	-0.34863	0.11475	0.16455	NaN	NaN	NaN	NaN	NaN	NaN
1.84	-44.6872	-122.514	1329.768	-0.58887	0.51465	-0.41455	-174.1425	-193.976	1259.9455	-2.3574	1.1914	-0.17773	-30.455	26.7591	53.432	-0.32813	0.12842	0.1709	NaN	NaN	NaN	NaN	NaN	NaN
1.842	-67.2855	-111.1003	1358.046	-0.58408	0.4876	-0.40205	-137.5366	-231.096	1238.498	-2.8066	1.502	-0.13379	-54.7848	-13.0726	67.948	-0.30005	0.1311	0.17383	NaN	NaN	NaN	NaN	NaN	NaN
1.844	-79.274	-92.316	1353.6588	-0.58985	0.46446	-0.38955	-169.904	-154.7773	1210.69441	-3.0994	1.7444	-0.10986	-75.7899	26.5188	65.45	-0.26904	0.12939	0.17334	NaN	NaN	NaN	NaN	NaN	NaN
1.846	-89.221	-89.688	1344.9458	-0.59805	0.44297	-0.37901	-172.133	-113.324	1204.2414	-3.3315	1.9829	-0.086426	-75.6716	-9.63	30.21162	-0.21289	0.11475	0.17236	NaN	NaN	NaN	NaN	NaN	NaN
1.848	-66.3516	-93.582	1357.1047	-0.6084	0.41953	-0.36367	-123.80227	-82.718	1182.0474	-3.4507	2.2173	-0.09375	-76.4417	24.125	18.112	-0.17871	0.096191	0.1709	NaN	NaN	NaN	NaN	NaN	NaN
1.85	-76.953	-91.9907	1386.1668	-0.62891	0.38916	-0.36182	-173.263	-56.475	1163.805	-3.3679	2.2805	-0.13892	-109.723	-26.7203	7.287	-0.099121	0.051758	0.17432	NaN	NaN	NaN	NaN	NaN	NaN
1.852	-71.6548	-100.62	1390.957562	-0.66036	0.35937	-0.36347	-178.8	-125.412	1188.5178	-3.1362	2.2407	-0.21436	-121.951	17.4699	23.543	-0.033692	0.011963	0.17066	NaN	NaN	NaN	NaN	NaN	NaN
1.854	-37.581	-91.769	1384.7464	-0.71016	0.33984	-0.35703	-146.918	-100.542	1168.603	-2.6323	2.0474	-0.28418	-90.539	-6.334	6.79	0.030762	-0.03125	0.16943	NaN	NaN	NaN	NaN	NaN	NaN
1.856	-13.242	-87.879	1394.4823	-0.77852	0.34102	-0.33711	-153.77	-112.25	1132.03	-2.3496	1.918	-0.31543	-99.707	27.4256	14.932	0.11426	-0.083984	0.15869	NaN	NaN	NaN	NaN	NaN	NaN
1.858	-6.1411	-60.9559	1388.28492	-0.87403	0.37051	-0.31972	-66.4006	-200.226	1152.029	-1.8726	1.6392	-0.36475	-104.322	-33.864	-0.0894999999999999	0.15527	-0.11816	0.15771	NaN	NaN	NaN	NaN	NaN	NaN
1.86	2.678	-49.1565	1390.1283	-0.99414	0.42871	-0.30225	-75.7306	-224.564	1179.616	-1.6357	1.4619	-0.39575	-114.04	9.014	15.57588	0.2251	-0.16406	0.14746	NaN	NaN	NaN	NaN	NaN	NaN
1.862	-17.66047	-34.603	1396.7143	-1.1318	0.51229	-0.29062	-66.564	-285.153	1211.796	-1.4707	1.3252	-0.4082	-68.324	14.001	14.9805	0.27393	-0.19654	0.14551	NaN	NaN	NaN	NaN	NaN	NaN
1.864	3.44	-41.564	1416.6796	-1.2745	0.60125	-0.30565	12.573	-329.182	1231.103	-1.3359	1.1797	-0.42285	-47.258	88.625	3.571	0.31494	-0.22021	0.14453	NaN	NaN	NaN	NaN	NaN	NaN
1.866	19.0904	-43.825	1427.9536	-1.4155	0.71022	-0.3369	19.961	-312.29	1267.23	-1.2612	1.1177	-0.44287	-3.147	61.4371	-6.592	0.35742	-0.24902	0.14404	NaN	NaN	NaN	NaN	NaN	NaN
1.868	26.454	-48.221	1424.5364	-1.5454	0.82858	-0.3702	48.0946	-344.012	1351.1003	-1.1055	0.98828	-0.47656	-30.419	69.703	20.324	0.36914	-0.25781	0.13867	NaN	NaN	NaN	NaN	NaN	NaN
1.87	40.4408	-36.741	1415.74204	-1.6768	0.96289	-0.42383	121.967	-304.2966	1416.5789	-0.95435	0.8811	-0.47974	-12.11	18.9523	24.8397	0.38818	-0.26855	0.13574	NaN	NaN	NaN	NaN	NaN	NaN
1.872	64.052	-28.26	1413.0949	-1.8134	1.096	-0.44874	75.7983	-259.0985	1413.967	-0.79297	0.77344	-0.47461	-5.35899999999999	45.706	29.8097	0.39209	-0.27002	0.13525	NaN	NaN	NaN	NaN	NaN	NaN
1.874	57.207	-26.9833	1403.136	-1.9638	1.231	-0.46407	112.442	-247.8369	1441.669	-0.58691	0.6416	-0.46582	16.07	32.969	28.7943	0.38477	-0.26855	0.13916	NaN	NaN	NaN	NaN	NaN	NaN
1.876	67.869	-26.8064	1423.03622	-2.1138	1.3732	-0.4621	118.002	-209.138	1464.1486	-0.49268	0.57471	-0.46143	7.20200000000001	58.72	58.26	0.36377	-0.25781	0.14063	NaN	NaN	NaN	NaN	NaN	NaN
1.878	67.145	-22.1644	1444.659	-2.2633	1.5057	-0.45499	77.511	-228.0115	1500.292	-0.34277	0.46875	-0.44775	21.81	34.688	54.512	0.33862	-0.24341	0.14087	NaN	NaN	NaN	NaN	NaN	NaN
1.88	78.112	-25.9386	1449.315	-2.4023	1.6211	-0.45996	110.833	-209.908	1531.351	-0.26782	0.40698	-0.44189	24.316	51.971	32.8673	0.31055	-0.22607	0.14258	NaN	NaN	NaN	NaN	NaN	NaN
1.882	65.001	-15.8201	1441.0295	-2.4909	1.7131	-0.47038	111.982	-155.327	1511.9426	-0.22607	0.34912	-0.44287	36.588	42.671702	-0.823500000000001	0.27295	-0.19238	0.14941	NaN	NaN	NaN	NaN	NaN	NaN
1.884	45.1359	-4.3722	1425.9699	-2.5332	1.769	-0.47947	102.114	-159.682	1517.556	-0.23633	0.29883	-0.4541	35.034	42.3783	27.4271	0.24609	-0.17578	0.15381	NaN	NaN	NaN	NaN	NaN	NaN
1.886	13.2133	-4.37656	1427.3353	-2.5219	1.7898	-0.48766	105.055	-122.924	1523.204	-0.26172	0.28564	-0.46436	39.243	25.1562	46.147	0.20361	-0.1416	0.15381	NaN	NaN	NaN	NaN	NaN	NaN
1.888	6.783	9.7061	1419.8342	-2.4567	1.7745	-0.49188	22.2367	-132.518	1544.944	-0.37305	0.29199	-0.46777	-3.442	26.6276	74.002	0.17407	-0.11597	0.15918	NaN	NaN	NaN	NaN	NaN	NaN
1.89	9.1583	13.8251	1420.3146	-2.3511	1.7388	-0.49463	27.5046	-172.923	1588.5416	-0.50757	0.33521	-0.44507	22.378	49.0031	57.494	0.1499	-0.095215	0.16406	NaN	NaN	NaN	NaN	NaN	NaN
1.892	-26.73229	20.2446	1398.43436	-2.2292	1.6885	-0.49813	2.28637	-172.2185	1611.3848	-0.6792	0.40967	-0.43213	-9.912	40.043	58.45583	0.12109	-0.072266	0.16455	NaN	NaN	NaN	NaN	NaN	NaN
1.894	-23.5785	27.8107	1386.60279	-2.1027	1.6281	-0.49795	-24.90387	-205.062	1657.036	-0.94678	0.52979	-0.43066	-36.155	36.87733	57.332	0.10938	-0.060059	0.16797	NaN	NaN	NaN	NaN	NaN	NaN
1.896	-46.221	33.8494	1390.1922	-1.9742	1.5495	-0.48811	-11.8805	-213.682	1683.497	-1.0762	0.59277	-0.43604	-79.64	22.8146	72.3	0.10205	-0.04834	0.16553	NaN	NaN	NaN	NaN	NaN	NaN
1.898	-44.8431	48.3394	1364.9691	-1.8611	1.4509	-0.47595	-48.728	-174.094	1668.54	-1.332	0.72852	-0.47363	-69.851	38.374	33.991	0.096435	-0.043213	0.16137	NaN	NaN	NaN	NaN	NaN	NaN
1.9	-47.46875	44.789	1355.712	-1.7734	1.3574	-0.46777	-57.963	-170.605	1689.291	-1.5178	0.84594	-0.51342	-90.652	28.7133	27.888	0.091309	-0.04248	0.15771	NaN	NaN	NaN	NaN	NaN	NaN
1.902	-44.5352	50.351	1337.146	-1.6942	1.2785	-0.4593	-39.338	-132.13077	1696.63	-1.7065	0.98486	-0.54639	-82.815	33.4618	15.063	0.090332	-0.043457	0.15674	NaN	NaN	NaN	NaN	NaN	NaN
1.904	-61.113	46.176	1331.447	-1.6325	1.2122	-0.45768	-91.771	-135.8235	1719.05	-2.0015	1.2026	-0.58154	-110.349	-17.1886	45.805	0.086426	-0.049316	0.15381	NaN	NaN	NaN	NaN	NaN	NaN
1.906	-59.7344	55.421	1338.32345	-1.5757	1.1529	-0.4466	-42.249	-170.789	1708.705	-2.168	1.3164	-0.58691	-100.92676	-3.206	35.2917	0.094238	-0.053711	0.14893	NaN	NaN	NaN	NaN	NaN	NaN
1.908	-54.9375	67.69595	1333.09338	-1.5249	1.1063	-0.43397	-16.6704	-147.014	1672.0433	-2.5215	1.5664	-0.58789	-83.7111	-24.414	38.0555	0.088135	-0.056885	0.14209	NaN	NaN	NaN	NaN	NaN	NaN
1.91	-49.7428	82.94004	1312.3775	-1.4897	1.0649	-0.41895	-46.213	-120.88	1643.987	-2.7822	1.7627	-0.57813	-81.9815	14.852	33.0589	0.082031	-0.052734	0.13574	NaN	NaN	NaN	NaN	NaN	NaN
1.912	-52.5718	96.2878	1278.70806	-1.4637	1.0429	-0.40655	10.4694	-105.773	1650.239	-3.0039	1.9551	-0.56445	-90.881	-34.0218	56.125	0.064941	-0.043945	0.12598	NaN	NaN	NaN	NaN	NaN	NaN
1.914	-52.2535	93.5416	1244.1137	-1.4403	1.0275	-0.39399	3.56343	-44.2043	1619.833	-3.1421	2.1606	-0.51514	-80.01793	15.1171	44.835	0.048828	-0.039551	0.125	NaN	NaN	NaN	NaN	NaN	NaN
1.916	-46.448	101.4271	1239.4615	-1.4215	1.0228	-0.3843	0.117000000000001	-50.561	1612.744	-3.043	2.2129	-0.4043	-64.9246	-6.1589	19.8938	0.030273	-0.021484	0.11475	NaN	NaN	NaN	NaN	NaN	NaN
1.918	-13.763	110.1979	1236.651	-1.3967	1.0204	-0.37623	73.558	-21.873	1614.098	-3.2515	2.2271	-0.63232	-52.825	38.9249	2.362	0.01709	-0.0026856	0.10547	NaN	NaN	NaN	NaN	NaN	NaN
1.92	2.875	122.2822	1230.8859	-1.3745	1.02	-0.36475	65.191	0.948	1620.664	-3.1677	2.2415	-0.77295	-33.032	-9.5371	1.838	0.0019531	0.015137	0.099609	NaN	NaN	NaN	NaN	NaN	NaN
1.922	-0.323999999999998	120.3217	1210.5174	-1.3505	1.0114	-0.35903	97.014	-15.296	1683	-2.8784	2.0962	-0.73389	-55.097	27.898	7.42	-0.015625	0.037598	0.097656	NaN	NaN	NaN	NaN	NaN	NaN
1.924	4.726	113.1138	1176.614	-1.329	1.0086	-0.3565	102.919	41.5278	1662.7309	-2.4878	1.8091	-0.59521	-36.988	0.3513	13.715	-0.023438	0.045898	0.092285	NaN	NaN	NaN	NaN	NaN	NaN
1.926	25.117	124.8336	1154.874	-1.3085	0.9993	-0.34452	80.078	37.477	1630.0931	-2.373	1.7422	-0.5918	8.574	71.496	16.275	-0.04248	0.074219	0.089355	NaN	NaN	NaN	NaN	NaN	NaN
1.928	17.622	143.928	1146.6296	-1.303	0.99265	-0.33509	149.548	13.631	1621.3022	-2.2749	1.7407	-0.64307	29.039	27.9525	31.8945	-0.054443	0.089844	0.079834	NaN	NaN	NaN	NaN	NaN	NaN
1.93	14.99	136.107	1131.3667	-1.2905	0.98096	-0.32373	124.106	20.2898	1608.339	-2.2703	1.8118	-0.65015	19.964	63.516	36.697	-0.071289	0.10059	0.075195	NaN	NaN	NaN	NaN	NaN	NaN
1.932	13.782	125.508	1121.8587	-1.2767	0.97079	-0.313	123.953	-30.3516	1628.6787	-2.2559	1.8594	-0.59375	15.018	16.42395	28.104	-0.089844	0.11572	0.066895	NaN	NaN	NaN	NaN	NaN	NaN
1.934	4.693	127.766	1097.8811	-1.2584	0.95827	-0.30423	165.669	-19.2725	1631.918	-2.1909	1.8032	-0.53076	19.952	80.639	-10.961	-0.097168	0.12842	0.067871	NaN	NaN	NaN	NaN	NaN	NaN
1.936	-16.273	135.984	1081.2324	-1.2408	0.94692	-0.29599	97.489	13.2276	1607.2322	-2.1348	1.7344	-0.50977	29.448	37.395	-13.723	-0.11719	0.14648	0.060547	NaN	NaN	NaN	NaN	NaN	NaN
1.938	-40.25	143.269	1070.54201	-1.2169	0.93288	-0.28735	116.263	9.418	1579.201	-1.9702	1.606	-0.50146	35.922	75.39	11.996	-0.13013	0.1604	0.058594	NaN	NaN	NaN	NaN	NaN	NaN
1.94	-19.859	137.6889	1041.224	-1.1934	0.91602	-0.28516	100.479	53.245	1558.27356	-1.8457	1.5078	-0.52051	19.628	13.343	34.132	-0.15088	0.17041	0.060547	NaN	NaN	NaN	NaN	NaN	NaN
1.942	-36.982	145.7347	1019.3592	-1.1609	0.89904	-0.27283	63.462	84.0407	1509.0554	-1.7261	1.4243	-0.5249	5.86499999999999	38.1779	77.6708	-0.17188	0.18262	0.05957	NaN	NaN	NaN	NaN	NaN	NaN
1.944	-35.842	140.4398	986.5472	-1.1302	0.87616	-0.26545	67.296	85.598	1517.6259	-1.6089	1.3188	-0.50732	7.392	-11.5761	103.39093	-0.17627	0.18262	0.05957	NaN	NaN	NaN	NaN	NaN	NaN
1.946	-69.7268	128.674	976.4916	-1.0892	0.84765	-0.25341	7.1195	137.517	1505.5422	-1.5698	1.271	-0.49268	-44.84	35.1751	160.903	-0.20264	0.18994	0.059082	NaN	NaN	NaN	NaN	NaN	NaN
1.948	-66.776	139.1201	958.9075	-1.0511	0.81793	-0.24402	-18.2931	129.5464	1492.931	-1.521	1.2144	-0.46826	-30.088	32.082	222.802	-0.21826	0.19042	0.052002	NaN	NaN	NaN	NaN	NaN	NaN
1.95	-81.41081	147.66622	948.607	-1.0127	0.78516	-0.23438	-7.7634	146.979	1472.704	-1.5027	1.1946	-0.46216	-49.313	83.374	307.6286	-0.23096	0.18994	0.038574	NaN	NaN	NaN	NaN	NaN	NaN
1.952	-85.04695	158.5959	897.0009	-0.97815	0.75393	-0.22199	-65.504	192.518	1390.0432	-1.4927	1.1743	-0.45654	-92.0148	39.971	401.23	-0.25195	0.19727	0.012207	NaN	NaN	NaN	NaN	NaN	NaN
1.954	-91.7839	151.6971	882.1588	-0.94192	0.72269	-0.21211	-55.352	140.891	1384.3746	-1.4746	1.1563	-0.4375	-125.3638	64.6859	557.369	-0.26514	0.20117	0.00097656	NaN	NaN	NaN	NaN	NaN	NaN
1.956	-95.1857	147.5906	861.0198	-0.91184	0.69338	-0.20158	-39.95345	158.43	1362.692	-1.4604	1.145	-0.42334	-88.69	27.635	752.998	-0.30713	0.22119	-0.030273	NaN	NaN	NaN	NaN	NaN	NaN
1.958	-98.151	160.2955	834.4898	-0.8881	0.66583	-0.19258	-93.13	132.5229	1327.788	-1.4297	1.1191	-0.3999	-124.572	36.343	977.204	-0.35645	0.23633	-0.057129	NaN	NaN	NaN	NaN	NaN	NaN
1.96	-115.5493	171.288	802.53358	-0.86719	0.64258	-0.17969	-84.909	98.616	1331.7913	-1.3972	1.1047	-0.38355	-154.015	-25.068	1145.923	-0.4165	0.25635	-0.091309	NaN	NaN	NaN	NaN	NaN	NaN
1.962	-98.899	172.152	774.7691	-0.84443	0.61552	-0.16923	-85.459	135.1523	1292.771	-1.3623	1.082	-0.36719	-134.7058	-57.016	1264.239	-0.53125	0.29639	-0.14795	NaN	NaN	NaN	NaN	NaN	NaN
1.964	-89.159	169.4161	745.2316	-0.82421	0.59374	-0.15771	-95.369	120.16	1253.2347	-1.3081	1.0444	-0.33789	-118.4987	-91.126	1358.274	-0.59863	0.32227	-0.16943	NaN	NaN	NaN	NaN	NaN	NaN
1.966	-62.4743	167.5036	715.1439	-0.80351	0.56992	-0.15108	-77.704	145.272	1233.2355	-1.2866	1.0249	-0.32666	-146.527	-86.212	1459.115	-0.77734	0.3916	-0.22314	NaN	NaN	NaN	NaN	NaN	NaN
1.968	-71.7698	160.1281	704.3597	-0.78018	0.54853	-0.14404	-107.302	192.3714	1194.826	-1.2383	0.98047	-0.3125	-127.678	-93.624	1464.142	-0.94043	0.47022	-0.2605	NaN	NaN	NaN	NaN	NaN	NaN
1.97	-47.897	165.5378	687.5007	-0.75879	0.52637	-0.13086	-45.3332	164.7934	1178.8379	-1.2075	0.94189	-0.2959	-109.767	-124.636	1454.097	-1.1304	0.56592	-0.28271	NaN	NaN	NaN	NaN	NaN	NaN
1.972	-20.06	167.3851	673.2847	-0.7332	0.50245	-0.11748	-23.947	199.165	1162.9861	-1.1772	0.91064	-0.28223	-30.4192	-161.494	1435.018	-1.416	0.71973	-0.29541	NaN	NaN	NaN	NaN	NaN	NaN
1.974	-35.472	166.3331	661.2522	-0.70938	0.48145	-0.11045	-51.85381	201.7739	1129.505	-1.1343	0.86865	-0.26416	41.505	-217.83	1444.555	-1.5679	0.79932	-0.28662	NaN	NaN	NaN	NaN	NaN	NaN
1.976	-16.967	157.6632	643.7164	-0.6875	0.45996	-0.10224	12.182	160.1187	1129.615	-1.1133	0.85352	-0.25391	78.377	-265.03	1426.962	-1.8901	0.96533	-0.21924	NaN	NaN	NaN	NaN	NaN	NaN
1.978	-0.199999999999996	149.542	609.9325	-0.66455	0.44248	-0.096192	23.359	208.248	1067.73049	-1.0815	0.81396	-0.23096	99.23	-325.46	1397.456	-2.127	1.0947	-0.14917	NaN	NaN	NaN	NaN	NaN	NaN
1.98	11.991	164.389	580.8752	-0.64453	0.41699	-0.087891	20.595	182.1252	985.392	-1.0569	0.79907	-0.21289	130.853	-281.213	1334.267	-2.353	1.231	-0.083984	NaN	NaN	NaN	NaN	NaN	NaN
1.982	-10.965	169.564	556.9789	-0.62314	0.3999	-0.080957	54.5	198.311	960.728	-1.0347	0.7915	-0.19727	149.087	-273.633	1324.472	-2.6128	1.3892	-0.011719	NaN	NaN	NaN	NaN	NaN	NaN
1.984	-10.603	155.651	547.95758	-0.60655	0.38428	-0.068946	8.111	228.724	923.531	-1.0107	0.77539	-0.17334	141.454	-175.028	1292.06	-2.7026	1.4761	0.0068359	NaN	NaN	NaN	NaN	NaN	NaN
1.986	11.191	144.556	532.7729	-0.58506	0.36552	-0.056054	32.869	162.655	917.6111	-0.99561	0.76611	-0.16455	145.844	-150.58	1283.408	-2.752	1.6035	0.018066	NaN	NaN	NaN	NaN	NaN	NaN
1.988	0.129000000000001	147.5142	511.2486	-0.56846	0.35517	-0.050879	26.296	182.4614	880.0595	-0.94092	0.73877	-0.13525	166.797	-97.68	1260.95	-2.6248	1.6536	0.050537	NaN	NaN	NaN	NaN	NaN	NaN
1.99	-8.878	142.59	483.4438	-0.55127	0.33936	-0.038574	-0.908999999999999	172.314	818.6913	-0.88745	0.69653	-0.12915	176.541	-142.462	1293.673	-2.3926	1.668	0.099609	NaN	NaN	NaN	NaN	NaN	NaN
1.992	-3.49	137.228	468.3914	-0.52998	0.32246	-0.029981	16.753	138.30009	825.748	-0.82373	0.65088	-0.11621	111.429	-140.915	1343.7727	-2.0249	1.6177	0.17383	NaN	NaN	NaN	NaN	NaN	NaN
1.994	11.724	149.3807	456.6425	-0.50781	0.3123	-0.026172	12.282	211.383	799.195	-0.74121	0.58984	-0.097656	84.551	-184.391	1337.4316	-1.8477	1.5547	0.19238	NaN	NaN	NaN	NaN	NaN	NaN
1.996	-13.528	168.1032	427.9706	-0.48243	0.2959	-0.021485	-13.821	188.5356	745.1398	-0.68359	0.53784	-0.077636	114.057	-188.779	1311.614	-1.5522	1.436	0.20703	NaN	NaN	NaN	NaN	NaN	NaN
1.998	-35.652	154.92	403.42808	-0.45898	0.28223	-0.017676	-7.822	197.6459	711.8327	-0.63477	0.48828	-0.064453	157.114	-249.113	1320.217	-1.3934	1.3528	0.20435	NaN	NaN	NaN	NaN	NaN	NaN
2	-41.942	129.7314	397.3644	-0.43311	0.26611	-0.011719	-52.6514	223.2422	676.996	-0.56836	0.42578	-0.038086	168.331	-262.198	1384.0008	-1.2871	1.2773	0.19287	NaN	NaN	NaN	NaN	NaN	NaN
2.002	-48.436	128.2385	379.2419	-0.40615	0.24736	-0.0054687	-51.5553	143.699	656.376	-0.53711	0.39258	-0.028809	173.9	-337.988	1424.7239	-1.1963	1.1895	0.19336	NaN	NaN	NaN	NaN	NaN	NaN
2.004	-76.229	140.6407	356.2391	-0.38467	0.23466	-0.00058594	-66.644	181.7692	614.767	-0.48047	0.33887	-0.012207	122.52	-344.982	1444.581	-1.1602	1.1563	0.18604	NaN	NaN	NaN	NaN	NaN	NaN
2.006	-78.2834	138.8301	333.1223	-0.36123	0.21631	-0.00058594	-104.1269	187.988	517.227	-0.44238	0.30053	0.00048825	53.929	-376.07	1457.754	-1.082	1.0742	0.13867	NaN	NaN	NaN	NaN	NaN	NaN
2.008	-64.6137	145.683	305.895	-0.33564	0.20332	0.006543	-93.737832	136.138	487.072	-0.40381	0.26416	0.010254	3.489	-353.761	1515.1384	-1.0115	1.0095	0.087159	NaN	NaN	NaN	NaN	NaN	NaN
2.01	-85.7671	144.6952	284.9285	-0.31689	0.19043	0.0092773	-120.775	183.8899	460.241	-0.35254	0.22363	0.026855	-35.612	-339.46	1555.178	-0.94141	0.95508	0.022461	NaN	NaN	NaN	NaN	NaN	NaN
2.012	-71.5212	131.2666	266.2964	-0.29775	0.18037	0.0083984	-146.245	135.763	419.764	-0.32861	0.2085	0.036621	-75.229	-248.3114	1575.515	-0.87451	0.89404	-0.057617	NaN	NaN	NaN	NaN	NaN	NaN
2.014	-68.465	112.802	249.8648	-0.27334	0.17315	0.011621	-114.483	147.299	387.086	-0.29053	0.18701	0.05127	-102.813	-211.303	1575.882	-0.85059	0.86523	-0.088379	NaN	NaN	NaN	NaN	NaN	NaN
2.016	-61.8693	112.507	253.4749	-0.25068	0.16259	0.019043	-108.065	206.1961	331.606	-0.26123	0.1626	0.0625	-153.141	-174.982	1596.1264	-0.87109	0.82813	-0.14746	NaN	NaN	NaN	NaN	NaN	NaN
2.018	-57.953	113.835	231.3088	-0.23037	0.15742	0.01836	-103.709	149.68508	332.5762	-0.23291	0.14795	0.066406	-108.09	-183.309	1626.385	-0.92969	0.82569	-0.17798	NaN	NaN	NaN	NaN	NaN	NaN
2.02	-59.9284	116.234	222.978	-0.20264	0.14893	0.020508	-97.4792	206.527	303.333	-0.20508	0.13086	0.080078	-105.403	-149.989	1665.778	-1.0132	0.84326	-0.21143	NaN	NaN	NaN	NaN	NaN	NaN
2.022	-44.866	109.40815	212.1482	-0.18106	0.14834	0.016016	-79.951	207.459	253.193	-0.18994	0.11719	0.085449	-60.018	-123.0931	1663.6459	-1.1738	0.91211	-0.24805	NaN	NaN	NaN	NaN	NaN	NaN
2.024	-39.346	113.5534	196.5683	-0.16064	0.14453	0.018457	-36.101	143.3269	246.703	-0.16797	0.10254	0.089355	-58.65295	-121.1495	1654.964	-1.2911	0.98927	-0.27051	NaN	NaN	NaN	NaN	NaN	NaN
2.026	-14.916	117.73	183.2284	-0.13603	0.13828	0.016895	-47.002	187.489	222.215	-0.15381	0.089599	0.094727	-28.334	-123.715	1667.081	-1.4043	1.0625	-0.29102	NaN	NaN	NaN	NaN	NaN	NaN
2.028	-47.517	110.017	168.3471	-0.11611	0.12901	0.016016	-37.732	111.507	227.1324	-0.13672	0.081543	0.095215	-56.324	-133.944	1703.622	-1.5562	1.1685	-0.31787	NaN	NaN	NaN	NaN	NaN	NaN
2.03	-24.584	100.645	167.081	-0.09668	0.12207	0.019043	-7.761	113.5823	213.4691	-0.1084	0.071289	0.10303	-51.8736	-126.401	1723.768	-1.6436	1.2305	-0.34277	NaN	NaN	NaN	NaN	NaN	NaN
2.032	-0.384	97.405	155.7725	-0.080078	0.11602	0.019141	-18.068	169.058	156.188	-0.10449	0.066406	0.104	-63.819	-140.909	1754.435	-1.8237	1.3774	-0.38477	NaN	NaN	NaN	NaN	NaN	NaN
2.034	-8.896	95.3062	135.1864	-0.064746	0.10927	0.020312	28.658	105.4894	147.6842	-0.085938	0.050781	0.10303	-72.346	-151.038	1768.879	-1.9832	1.4895	-0.39868	NaN	NaN	NaN	NaN	NaN	NaN
2.036	7.236	76.9478	132.0791	-0.051074	0.10186	0.020312	27.817	134.945	148.705	-0.075439	0.041504	0.10864	-73.2579	-191.317	1817.702	-2.1563	1.6055	-0.4082	NaN	NaN	NaN	NaN	NaN	NaN
2.038	1.606	69.1598	123.5376	-0.037793	0.095117	0.020703	30.069	119.852	110.3265	-0.066895	0.031738	0.10547	-16.564	-167.726	1847.378	-2.3979	1.7661	-0.38623	NaN	NaN	NaN	NaN	NaN	NaN
2.04	17.903	69.4112	116.3575	-0.026855	0.091797	0.024902	56.972	69.078	118.833	-0.055176	0.025879	0.10547	14.118	-157.67644	1845.99	-2.5186	1.8438	-0.36914	NaN	NaN	NaN	NaN	NaN	NaN
2.042	-6.709	93.6944	104.68577	-0.014941	0.084375	0.031933	38.571	129.178	102.8113	-0.049316	0.020508	0.10986	57.412	-91.5245	1818.01	-2.7109	2	-0.32471	NaN	NaN	NaN	NaN	NaN	NaN
2.044	-6.62200000000001	97.284	101.7485	-0.0041015	0.075684	0.023242	24.623	64.7993	93.9284	-0.043945	0.018066	0.11035	66.5501	-81.909	1788.1396	-2.7959	2.0874	-0.29151	NaN	NaN	NaN	NaN	NaN	NaN
2.046	-8.779	85.717	103.7557	-0.0021484	0.071777	0.02832	31.679	61.4681	112.871	-0.041504	0.016602	0.11353	48.3336	-33.9402	1756.922	-2.8359	2.1387	-0.2627	NaN	NaN	NaN	NaN	NaN	NaN
2.048	-3.094	82.6078	95.8642	0.0048828	0.069433	0.028516	17.995	115.995	67.0491	-0.038086	0.018066	0.11572	51.9837	-43.723	1738.121	-2.8198	2.147	-0.2251	NaN	NaN	NaN	NaN	NaN	NaN
2.05	-37.657	79.9374	90.10308	0.010742	0.065918	0.026367	6.52	55.0229	53.327	-0.037109	0.019043	0.11523	80.3157	10.941	1727.375	-2.7944	2.1392	-0.21436	NaN	NaN	NaN	NaN	NaN	NaN
2.052	-56.5236	66.2111	70.153	0.01748	0.059668	0.02666	-4.406	99.101	65.0581	-0.037598	0.018066	0.11572	66.26	-16.5358	1708.2593	-2.7324	2.1055	-0.1958	NaN	NaN	NaN	NaN	NaN	NaN
2.054	-38.889	59.9586	82.9575	0.020313	0.057226	0.025	-42.1556	94.419	47.092	-0.03418	0.027344	0.11523	43.692	49.1484	1692.0725	-2.6853	2.0783	-0.18359	NaN	NaN	NaN	NaN	NaN	NaN
2.056	-51.013	67.065	70.2361	0.023437	0.048242	0.026172	-58.3491	32.8663	52.68	-0.032715	0.03247	0.11402	-21.018	48.274	1672.076	-2.6479	2.0513	-0.17725	NaN	NaN	NaN	NaN	NaN	NaN
2.058	-59.265	55.062	70.29794	0.024024	0.047266	0.029199	-52.5012	73.726	33.3381	-0.030762	0.036133	0.1123	-37.19	133.705	1662.234	-2.5781	2.002	-0.15234	NaN	NaN	NaN	NaN	NaN	NaN
2.06	-62.6641	49.72225	54.3565	0.024902	0.035645	0.031738	-80.0163	-10.786	21.223	-0.02832	0.044434	0.11377	-46.1098	90.025	1681.348	-2.521	1.9634	-0.13818	NaN	NaN	NaN	NaN	NaN	NaN
2.062	-60.57201	43.8985	44.0082	0.022851	0.036328	0.036426	-81.0137	-18.419	47.835	-0.027832	0.047363	0.11328	-42.656	135.064	1670.265	-2.3867	1.8379	-0.12744	NaN	NaN	NaN	NaN	NaN	NaN
2.064	-83.79108	50.1695	41.6469	0.023145	0.031738	0.03916	-94.71	31.287	35.2067	-0.024414	0.051758	0.11914	-61.719	56.336	1680.401	-2.283	1.7288	-0.13574	NaN	NaN	NaN	NaN	NaN	NaN
2.066	-83.6784	44.0207	44.5633	0.016895	0.02705	0.041113	-102.536	-25.71639	45.18	-0.019775	0.054932	0.11353	-92.3719	113.903	1653.348	-2.1851	1.6255	-0.13672	NaN	NaN	NaN	NaN	NaN	NaN
2.068	-65.6397	33.6289	51.5037	0.018164	0.021875	0.038867	-95.6532	35.2102	32.4078	-0.016602	0.056641	0.11963	-116.142	44.676	1651.7225	-2.0874	1.5298	-0.14844	NaN	NaN	NaN	NaN	NaN	NaN
2.07	-65.8797	37.3977	51.4786	0.020508	0.019043	0.038574	-97.913	28.4943	11.477	-0.0083008	0.05127	0.12061	-148.557	90.171	1632.932	-2.043	1.4902	-0.15088	NaN	NaN	NaN	NaN	NaN	NaN
2.072	-46.103	37.0928	45.4018	0.025977	0.013965	0.037891	-85.9543	-13.7398	30.6423	0	0.052246	0.11963	-115.128	27.022	1638.158	-1.9785	1.4336	-0.15088	NaN	NaN	NaN	NaN	NaN	NaN
2.074	-74.84414	31.4527	37.9792	0.027832	0.010644	0.041601	-102.778	56.76179	26.1058	0.011719	0.040527	0.11768	-76.9577	94.661	1607.894	-1.9444	1.4004	-0.14282	NaN	NaN	NaN	NaN	NaN	NaN
2.076	-57.93	38.067	48.7105	0.037989	0.0075195	0.040821	-68.12167	-5.652	25.6617	0.026367	0.031983	0.1167	-69.107	67.411	1584.369	-1.916	1.375	-0.13916	NaN	NaN	NaN	NaN	NaN	NaN
2.078	-40.78	48.154	45.0589	0.046387	0.0035156	0.037988	-51.103	-1.016	35.075	0.041992	0.019043	0.11523	-116.649	160.8871	1544.5147	-1.8843	1.3521	-0.12988	NaN	NaN	NaN	NaN	NaN	NaN
2.08	-29.969	46.74	48.79	0.055664	-0.0019531	0.037109	-50.5234	43.8291	20.088	0.072266	-0.0014648	0.11523	-116.207	135.881	1525.122	-1.8652	1.3398	-0.12744	NaN	NaN	NaN	NaN	NaN	NaN
2.082	-24.508	23.7887	43.72441	0.06836	-0.0083984	0.040137	-15.221	-18.8526	44.016	0.085449	-0.012695	0.11621	-111.406	209.641	1489.9343	-1.8198	1.3052	-0.12012	NaN	NaN	NaN	NaN	NaN	NaN
2.084	-13.539	4.7837	34.9525	0.077929	-0.012207	0.039356	-2.508	45.36	32.1369	0.11279	-0.040039	0.11475	-50.3558	150.3778	1447.308	-1.7712	1.2815	-0.11914	NaN	NaN	NaN	NaN	NaN	NaN
2.086	19.106	13.769	23.4226	0.085352	-0.018066	0.037402	-3.871	53.852	5.6826	0.13379	-0.058593	0.11036	-33.0684	203.674	1423.024	-1.7173	1.2505	-0.11963	NaN	NaN	NaN	NaN	NaN	NaN
2.088	-11.467	21.2229	24.94503	0.092676	-0.025	0.0375	19.233	4.9824	23.608	0.15674	-0.08252	0.11133	-0.863	150.4422	1395.79	-1.6396	1.2178	-0.12402	NaN	NaN	NaN	NaN	NaN	NaN
2.09	-3.313	18.9442	39.1771	0.099609	-0.027344	0.036133	22.413	65.161	19.9116	0.18066	-0.11426	0.10791	-13.2957	229.034	1371.903	-1.6011	1.1958	-0.12256	NaN	NaN	NaN	NaN	NaN	NaN
2.092	-1.657	23.105	31.5422	0.10283	-0.033887	0.036426	40.795	-13.6935	21.57887	0.20166	-0.12891	0.10791	49.036	205.6298	1319.398	-1.5327	1.1646	-0.12646	NaN	NaN	NaN	NaN	NaN	NaN
2.094	16.694	22.3452	32.9492	0.10596	-0.032422	0.03584	48.186	-21.0868	40.192	0.22656	-0.15869	0.099121	69.876	265.15416	1246.326	-1.4809	1.1391	-0.12793	NaN	NaN	NaN	NaN	NaN	NaN
2.096	1.87	29.617	33.4582	0.10948	-0.032422	0.035449	47.1801	17.2813	18.151	0.25147	-0.17652	0.10376	97.499	193.435	1201.035	-1.4277	1.1172	-0.12744	NaN	NaN	NaN	NaN	NaN	NaN
2.098	-1.617	23.9513	49.3457	0.11055	-0.030176	0.031543	41.6035	-42.433	24.1223	0.27637	-0.1958	0.10938	111.235	218.467	1174.992	-1.3477	1.0859	-0.12939	NaN	NaN	NaN	NaN	NaN	NaN
2.1	-9.586	24.0466	66.381	0.10449	-0.021973	0.031738	25.519	31.376	40.958	0.2959	-0.22266	0.10303	119.928	156.895	1142.777	-1.3062	1.0688	-0.12549	NaN	NaN	NaN	NaN	NaN	NaN
2.102	-22.601	32.95037	44.4131	0.10342	-0.016309	0.028223	11.583	43.532	15.436	0.30322	-0.22998	0.10156	110.24	224.756	1116.0232	-1.2222	1.0337	-0.12744	NaN	NaN	NaN	NaN	NaN	NaN
2.104	-30.459	13.2341	47.0323	0.097656	-0.0073242	0.028906	-2	14.5596	19.4332	0.31348	-0.24121	0.094727	107.22	194.7532	1083.155	-1.1494	0.99755	-0.12573	NaN	NaN	NaN	NaN	NaN	NaN
2.106	-34.455	-15.7518	47.893	0.089063	9.7664e-05	0.036328	8.281	76.735	19.413	0.32006	-0.24756	0.093506	99.141	241.442	1037.074	-1.0781	0.95313	-0.12695	NaN	NaN	NaN	NaN	NaN	NaN
2.108	-31.655	-27.072036	74.5548	0.073047	0.011035	0.035157	-23.567	9.0653	22.170858	0.31982	-0.25342	0.1001	98.545	200.099	975.7449	-0.97998	0.89307	-0.12891	NaN	NaN	NaN	NaN	NaN	NaN
2.11	-43.192	-22.9496	79.2561	0.060059	0.021973	0.038086	-54.9054	12.0608	32.4801	0.31445	-0.25781	0.10938	52.153	261.83138	914.869	-0.93115	0.86377	-0.12891	NaN	NaN	NaN	NaN	NaN	NaN
2.112	-68.6138	-32.413	95.99164	0.04375	0.038281	0.040723	-69.1512	55.554	7.288	0.31689	-0.24512	0.13428	74.073	248.0267	883.54	-0.84229	0.79346	-0.13086	NaN	NaN	NaN	NaN	NaN	NaN
2.114	-84.5032	-43.0246	141.305	0.022168	0.054199	0.040136	-74.1747	4.23	-8.169	0.28271	-0.25732	0.13965	54.614	306.127	854.567	-0.77857	0.74243	-0.13672	NaN	NaN	NaN	NaN	NaN	NaN
2.116	-95.5221	-44.4839	187.891	0.0073243	0.070215	0.036621	-80.5244	50.3774	5.5147	0.2417	-0.24926	0.10718	42.748	273.3475	800.1086	-0.72461	0.69141	-0.13477	NaN	NaN	NaN	NaN	NaN	NaN
2.118	-110.1383	-38.4164	263.863	-0.0091795	0.090332	0.031153	-83.2203	48.449	4.5432	0.22461	-0.2251	0.10449	28.9353	295.5362	744.307	-0.66064	0.63721	-0.12646	NaN	NaN	NaN	NaN	NaN	NaN
2.12	-124.7364	-17.0943	352.015	-0.025391	0.104	0.030762	-98.2542	19.3674	20.5772	0.20996	-0.19336	0.11621	33.944	260.078	684.492	-0.62793	0.6084	-0.13184	NaN	NaN	NaN	NaN	NaN	NaN
2.122	-104.624	-17.2218	429.762	-0.04082	0.12314	0.02461	-80.7453	89.818	16.096	0.2002	-0.18262	0.11914	5.8598	274.546	658.592	-0.57031	0.55957	-0.12695	NaN	NaN	NaN	NaN	NaN	NaN
2.124	-148.7655	-10.19878	504.499	-0.060547	0.14443	0.020606	-80.264	26.9413	21.7941	0.17139	-0.1543	0.12109	-38.035	261.983	621.1957	-0.52685	0.51977	-0.12573	NaN	NaN	NaN	NaN	NaN	NaN
2.126	-153.7408	-19.41043	576.7587	-0.086328	0.16318	0.019824	-99.289	16.3	52.515	0.14257	-0.12793	0.12451	-36.1703	286.588	586.5375	-0.4834	0.48828	-0.12598	NaN	NaN	NaN	NaN	NaN	NaN
2.128	-125.758	-43.122	626.33313	-0.11875	0.18535	0.012402	-92.46	44.8576	39.1557	0.12695	-0.10547	0.11816	-69.002	270.184	521.9419	-0.42236	0.44189	-0.13037	NaN	NaN	NaN	NaN	NaN	NaN
2.13	-70.872	-31.739	681.051	-0.15674	0.20117	0.0019531	-81.7308	-18.90074	28.6135	0.098633	-0.079102	0.11621	-73.575	270.969	468.376	-0.39453	0.41699	-0.13086	NaN	NaN	NaN	NaN	NaN	NaN
2.132	-48.89	-0.880000000000003	728.938	-0.20215	0.21982	-0.017578	-33.367	29.2672	39.85531	0.07959	-0.066406	0.1167	-92.316	248.129	436.4709	-0.32324	0.36816	-0.13721	NaN	NaN	NaN	NaN	NaN	NaN
2.134	-59.446	-1.043	769.348	-0.25556	0.24072	-0.033887	-40.7955	30.7955	12.8611	0.056641	-0.050293	0.11768	-81.5981	234.6102	421.7519	-0.27246	0.32763	-0.1416	NaN	NaN	NaN	NaN	NaN	NaN
2.136	-25.3411	-14.9883	791.0414	-0.31025	0.26416	-0.058887	-42.0721	-2.6659	49.588	0.040039	-0.033936	0.11816	-55.1389	219.6778	373.858	-0.22266	0.28516	-0.14453	NaN	NaN	NaN	NaN	NaN	NaN
2.138	0.0649999999999995	-26.26143	809.8071	-0.37598	0.29209	-0.082031	-13.77	70.173	39.8825	0.023438	-0.02002	0.11719	-30.4664	207.586	355.866	-0.14404	0.22705	-0.15869	NaN	NaN	NaN	NaN	NaN	NaN
2.14	36.984	-35.195	852.3107	-0.45508	0.32129	-0.097656	7.912	16.6001	8.3596	0.0068359	0	0.10791	-36.678	195.4184	312.001	-0.10742	0.19824	-0.15527	NaN	NaN	NaN	NaN	NaN	NaN
2.142	21.1997	-40.886	905.547	-0.55654	0.35761	-0.11123	24.014	20.0677	44.648	-0.0080564	0.010498	0.10205	-15.8806	148.981	293.917	-0.043945	0.13721	-0.1626	NaN	NaN	NaN	NaN	NaN	NaN
2.144	38.2344	-32.1788	926.378	-0.68144	0.39805	-0.12061	22.029	52.1	44.8752	-0.020508	0.021973	0.10107	-0.181999999999999	144.4391	259.112	0.002686	0.09839	-0.16553	NaN	NaN	NaN	NaN	NaN	NaN
2.146	62.181	-26.9041	936.8516	-0.82871	0.46211	-0.11787	20.915	1.9034	54.55	-0.042969	0.050781	0.092773	21.442	132.086	221.327	0.043945	0.057129	-0.16943	NaN	NaN	NaN	NaN	NaN	NaN
2.148	80.48	-11.838	951.5567	-0.9958	0.53662	-0.1164	47.903	54.472	52.145	-0.05127	0.068359	0.091797	40.286	143.441	155.5802	0.084473	0.00048828	-0.16992	NaN	NaN	NaN	NaN	NaN	NaN
2.15	65.733	-5.776	981.782	-1.1753	0.62549	-0.1167	43.8954	33.248	31.613	-0.074707	0.10352	0.089355	27.2637	110.4322	124.259	0.10059	-0.020996	-0.17432	NaN	NaN	NaN	NaN	NaN	NaN
2.152	64.928	-1.434	996.4295	-1.3598	0.72109	-0.11494	25.433	-5.7566	37.215	-0.09717	0.12867	0.085449	-21.863	105.159	102.308	0.12451	-0.070801	-0.17188	NaN	NaN	NaN	NaN	NaN	NaN
2.154	77.739	-10.91	1007.4766	-1.5339	0.83525	-0.11055	15.743	44.6066	49.0003	-0.11475	0.15039	0.07959	31.474	62.498	97.623	0.13257	-0.10352	-0.17603	NaN	NaN	NaN	NaN	NaN	NaN
2.156	17.368	-36.281	997.5148	-1.6921	0.95909	-0.10429	15.82	0.9923	13.7265	-0.13867	0.17627	0.078613	52.378	64.396	87.9038	0.13574	-0.13281	-0.17578	NaN	NaN	NaN	NaN	NaN	NaN
2.158	8.3048	-63.765	1005.819	-1.8286	1.098	-0.10049	11.568	0.449400000000001	27.4965	-0.14893	0.18848	0.077637	71.822	21.565	85.384	0.1333	-0.16357	-0.17334	NaN	NaN	NaN	NaN	NaN	NaN
2.16	45.464	-80.311	998.2247	-1.9429	1.2358	-0.10889	-2.4	26.3586	44.164	-0.17627	0.20557	0.072754	52.5435	53.145	54.034	0.12891	-0.1792	-0.17285	NaN	NaN	NaN	NaN	NaN	NaN
2.162	61.646	-79.331	996.3121	-2.0051	1.3687	-0.11026	-35.127	-68.929	81.0682	-0.19726	0.22046	0.069336	61.2593	22.075	49.8491	0.11572	-0.20898	-0.17627	NaN	NaN	NaN	NaN	NaN	NaN
2.164	33.4541	-96.046	997.6998	-2.0203	1.4717	-0.11601	-52.731	-54.322	107.8731	-0.21045	0.23584	0.068359	23.027	59.967	8.742	0.10278	-0.2146	-0.17895	NaN	NaN	NaN	NaN	NaN	NaN
2.166	1.266	-116.2919	1000.315	-1.9727	1.5248	-0.1293	-37.3399	-24.6941	99.546	-0.24072	0.24316	0.05127	23.212	16.268	12.97	0.088379	-0.2168	-0.17627	NaN	NaN	NaN	NaN	NaN	NaN
2.168	15.909	-121.562	1003.937	-1.8799	1.5244	-0.13536	-68.4542	-32.4848	148.628	-0.24756	0.25098	0.037109	12.58	28.9772	22.4925	0.060059	-0.22559	-0.1748	NaN	NaN	NaN	NaN	NaN	NaN
2.17	-6.31	-130.878	1008.397	-1.7593	1.4829	-0.14697	-97.1907	31.238	225.421	-0.26367	0.271	0.018555	-17.771	-29.6307	34.3577	0.038574	-0.22437	-0.1726	NaN	NaN	NaN	NaN	NaN	NaN
2.172	3.798	-132.512	1035.94923	-1.619	1.4041	-0.15449	-149.9647	-6.1753	302.063	-0.28418	0.29053	0.0053711	-43.786	23.717	-1.021	0.015137	-0.2207	-0.17236	NaN	NaN	NaN	NaN	NaN	NaN
2.174	-45.263	-138.169	1070.7613	-1.4848	1.3227	-0.15303	-121.9674	38.6045	410.355	-0.30908	0.30615	-0.012207	-56.7566	7.47495	15.394	-0.023926	-0.21973	-0.16846	NaN	NaN	NaN	NaN	NaN	NaN
2.176	-45.097	-121.9956	1078.89	-1.3769	1.2399	-0.14209	-107.49714	90.902	560.666	-0.35742	0.33594	-0.038086	-98.2313	50.862	6.4326	-0.040039	-0.21289	-0.16748	NaN	NaN	NaN	NaN	NaN	NaN
2.178	-62.7001	-107.951	1064.727	-1.2877	1.1713	-0.11934	-154.118	19.749	730.993	-0.38477	0.35059	-0.060059	-67.84296	3.956147	30.075	-0.085938	-0.20264	-0.16113	NaN	NaN	NaN	NaN	NaN	NaN
2.18	-102.238	-113.591	1083.2764	-1.2192	1.1157	-0.10352	-126.3364	19.77756	868.833	-0.45264	0.38721	-0.10352	-103.872	50.099	28.65832	-0.125	-0.19043	-0.15771	NaN	NaN	NaN	NaN	NaN	NaN
2.182	-88.249	-121.607	1111.5381	-1.1635	1.0679	-0.089746	-109.4842	-2.045	902.113	-0.52588	0.42774	-0.13965	-82.508	21.293	10.883	-0.16602	-0.17285	-0.14893	NaN	NaN	NaN	NaN	NaN	NaN
2.184	-74.5224	-126.252	1131.673	-1.1042	1.0274	-0.089453	-115.612	-52.064	970.0225	-0.60742	0.47656	-0.17676	-95.8664	61.24636	10.148	-0.22949	-0.14404	-0.13428	NaN	NaN	NaN	NaN	NaN	NaN
2.186	-64.42478	-138.625	1146.333	-1.0374	0.99268	-0.092969	-91.805	-6.98700000000001	1033.0268	-0.75049	0.55322	-0.21826	-102.563	34.8642	45.6253	-0.25732	-0.12695	-0.12646	NaN	NaN	NaN	NaN	NaN	NaN
2.188	-73.575	-130.82749	1167.274	-0.96641	0.95566	-0.096191	-123.7357	-39.991	1071.475	-0.83496	0.60547	-0.24023	-120.994	83.121	34.56461	-0.32471	-0.097168	-0.11768	NaN	NaN	NaN	NaN	NaN	NaN
2.19	-36.3092	-131.38	1199.809	-0.89209	0.92236	-0.10156	-96.1918	-47.134	1081.89	-1.0391	0.7002	-0.28027	-81.7072	57.62869	17.02533	-0.37231	-0.067383	-0.092774	NaN	NaN	NaN	NaN	NaN	NaN
2.192	-14.63	-121.256	1206.9044	-0.83144	0.87988	-0.10185	-3.837	-55.2623	1047.77491	-1.2072	0.78344	-0.29297	-59.638	79.635	11.4827	-0.4126	-0.042969	-0.085938	NaN	NaN	NaN	NaN	NaN	NaN
2.194	-27.326	-117.478	1208.7015	-0.79248	0.85166	-0.0959	13.726	-140.3	1064.282	-1.3828	0.86719	-0.30176	-87.629	35.1134	22.0982	-0.45264	-0.0063477	-0.064941	NaN	NaN	NaN	NaN	NaN	NaN
2.196	-1.006	-128.183	1248.519	-0.76592	0.81963	-0.10137	37.734	-139.8	1130.285	-1.6226	0.97705	-0.29932	-97.7308	54.529	53.892	-0.4668	0.013672	-0.052246	NaN	NaN	NaN	NaN	NaN	NaN
2.198	-33.833	-141.1818	1283.9104	-0.75449	0.79883	-0.10479	76.825	-138.424	1098.845	-1.7378	1.0337	-0.29053	-53.43252	27.7953	69.915	-0.47705	0.041992	-0.027832	NaN	NaN	NaN	NaN	NaN	NaN
2.2	-0.625	-138.6744	1317.577	-0.75195	0.78516	-0.10791	94.62	-164.622	1093.214	-1.9526	1.1587	-0.26953	-26.434	48.3662	43.6893	-0.4834	0.073487	-0.015869	NaN	NaN	NaN	NaN	NaN	NaN
2.202	-3.124	-121.515	1329.085	-0.74941	0.77442	-0.11309	96.795	-86.499	1071.786	-2.0906	1.2395	-0.2627	-6.195	12.8425	48.6527	-0.48242	0.097168	-0.00097656	NaN	NaN	NaN	NaN	NaN	NaN
2.204	-13.783	-112.782	1340.435	-0.7417	0.7583	-0.1168	89.999	-72.108	1037.2395	-2.1934	1.3184	-0.25977	-14.53	14.545	38.3076	-0.45361	0.12646	0.010742	NaN	NaN	NaN	NaN	NaN	NaN
2.206	4.134	-114.144	1346.864	-0.7249	0.74072	-0.12266	107.265	-36.047	1051.7433	-2.2358	1.3989	-0.24902	13.349	7.0856	48.9751	-0.43555	0.13623	0.021484	NaN	NaN	NaN	NaN	NaN	NaN
2.208	5.834	-104.384	1347.31951	-0.7001	0.71045	-0.13369	112.975	10.69	1049.209	-2.2085	1.4224	-0.23877	44.551	43.5612	49.4893	-0.37939	0.14551	0.022949	NaN	NaN	NaN	NaN	NaN	NaN
2.21	6.767	-100.556	1339.9991	-0.67188	0.67285	-0.14844	57.925	-62.498	1058.9106	-2.062	1.4224	-0.20654	47.69575	32.6123	67.127	-0.32568	0.14575	0.025635	NaN	NaN	NaN	NaN	NaN	NaN
2.212	6.519	-105.079	1346.758	-0.64922	0.62021	-0.16855	27.116	-77.687	1101.1812	-1.9136	1.393	-0.17554	49.9783	7.249	67.467	-0.26123	0.13086	0.025879	NaN	NaN	NaN	NaN	NaN	NaN
2.214	41.41	-103.176	1351.062	-0.63896	0.5708	-0.18926	14.1849	-115.411	1089.904	-1.7637	1.3516	-0.14111	28.339	-18.913	63.568	-0.1543	0.10059	0.016602	NaN	NaN	NaN	NaN	NaN	NaN
2.216	8.471	-103.065	1344.6707	-0.65576	0.5251	-0.2209	15.07	-196.437	1097.1539	-1.5952	1.3013	-0.085449	26.904	-0.123999999999999	41.2438	-0.10059	0.07373	0.0058594	NaN	NaN	NaN	NaN	NaN	NaN
2.218	-11.342	-86.1928	1345.97486	-0.70625	0.49199	-0.24072	46.41	-178.66	1117.5645	-1.5356	1.2739	-0.058105	21.34	17.1808	22.171	0.0083008	0.022461	0.0019531	NaN	NaN	NaN	NaN	NaN	NaN
2.22	-17.466	-70.0932	1354.06	-0.78467	0.48584	-0.25732	30.436	-221.765	1113.02	-1.4487	1.2446	-0.011719	7.733	31.1873	30.713	0.083499	-0.025391	-0.0073242	NaN	NaN	NaN	NaN	NaN	NaN
2.222	-13.247	-62.104	1359.202	-0.90352	0.50801	-0.25996	56.7053	-244.5247	1156.604	-1.395	1.2285	0.028809	-24.505	24.1146	42.8701	0.14893	-0.068848	-0.015137	NaN	NaN	NaN	NaN	NaN	NaN
2.224	-39.357	-69.03	1369.5383	-1.0386	0.55938	-0.24043	21.2044	-223.322	1177.949	-1.332	1.2129	0.061035	-26.891	-3.913	18.9072	0.22021	-0.12354	-0.023438	NaN	NaN	NaN	NaN	NaN	NaN
2.226	-79.3311	-56.341	1374.7131	-1.2012	0.62461	-0.23379	-31.9628	-296.833	1221.723	-1.2271	1.1841	0.070313	-19.007	1.463	11.1319	0.24658	-0.14014	-0.021484	NaN	NaN	NaN	NaN	NaN	NaN
2.228	-81.144201	-78.292	1391.6812	-1.372	0.70967	-0.23623	-19.123	-285.238	1290.5479	-1.1641	1.1592	0.07373	-43.976	-3.983	10.2284	0.28711	-0.17334	-0.027832	NaN	NaN	NaN	NaN	NaN	NaN
2.23	-98.607	-76.821	1385.9423	-1.562	0.82666	-0.2417	-43.0592	-260.963	1316.4331	-1.0273	1.1152	0.077637	-60.9366	8.742	30.971	0.2937	-0.18505	-0.033447	NaN	NaN	NaN	NaN	NaN	NaN
2.232	-95.992	-72.2459	1388.4759	-1.7549	0.97674	-0.25293	-94.2696	-244.538	1356.763	-0.93408	1.0786	0.072021	-67.8593	5.801	41.44043	0.30127	-0.19287	-0.032715	NaN	NaN	NaN	NaN	NaN	NaN
2.234	-99.0336	-61.233	1376.726	-1.9386	1.1458	-0.25967	-107.401	-143.963	1373.735	-0.85547	1.0332	0.067383	-89.1983	30.6233	2.35	0.29053	-0.19727	-0.033203	NaN	NaN	NaN	NaN	NaN	NaN
2.236	-77.1376	-68.993	1369.6806	-2.107	1.3306	-0.25342	-126.805	-122.613	1336.6727	-0.78662	0.97314	0.044922	-69.7528	11.143	-2.683	0.28711	-0.19971	-0.030762	NaN	NaN	NaN	NaN	NaN	NaN
2.238	-89.8413	-65.969	1367.994	-2.2485	1.5141	-0.25273	-112.288	-131.611	1360.43588	-0.75928	0.9458	0.029785	-104.066	27.9848	-0.184000000000001	0.28271	-0.1958	-0.032227	NaN	NaN	NaN	NaN	NaN	NaN
2.24	-108.31613	-54.529	1372.3904	-2.3433	1.6821	-0.25244	-82.432	-97.756	1383.627	-0.72998	0.90283	-0.014648	-103.2561	14.779	28.8086	0.2771	-0.20215	-0.03418	NaN	NaN	NaN	NaN	NaN	NaN
2.242	-86.2769	-51.176	1385.4909	-2.3566	1.8114	-0.24697	-75.111	-152.8048	1410.347	-0.71875	0.87109	-0.050782	-126.181	62.202	22.855	0.26953	-0.20508	-0.031738	NaN	NaN	NaN	NaN	NaN	NaN
2.244	-70.743	-30.7166	1392.4452	-2.3054	1.8723	-0.2292	-55.902	-143.392	1446.868	-0.71631	0.84814	-0.094727	-88.4901	52.426	14.581	0.26465	-0.20605	-0.030762	NaN	NaN	NaN	NaN	NaN	NaN
2.246	-76.0124	-9.0416	1393.1755	-2.2253	1.8665	-0.23232	-31.142	-117.16	1433.61	-0.73291	0.81055	-0.14502	-88.009	60.7	0.272	0.25293	-0.20996	-0.033203	NaN	NaN	NaN	NaN	NaN	NaN
2.248	-85.9674	6.977	1379.3079	-2.2503	1.8462	-0.34541	-56.37	-160.104	1459.8224	-0.75	0.7998	-0.16162	-90.559	16.03891	41.065	0.23242	-0.20947	-0.038574	NaN	NaN	NaN	NaN	NaN	NaN
2.25	-91.48167	5.936	1387.664	-2.1602	1.8242	-0.37305	-7.034	-123.461	1502.894	-0.79639	0.79346	-0.19189	-82.301	36.7634	41.513	0.21655	-0.20874	-0.041748	NaN	NaN	NaN	NaN	NaN	NaN
2.252	-83.7165	2.025	1377.205	-2.0051	1.7231	-0.29453	-3.102	-127.204	1482.825	-0.84057	0.80054	-0.19628	-31.072	24.0527	39.1673	0.19971	-0.20117	-0.041016	NaN	NaN	NaN	NaN	NaN	NaN
2.254	-62.438	3.2835	1375.572	-1.8909	1.6146	-0.23496	-8.159	-156.201	1534.573	-0.90283	0.81396	-0.20361	-17.477	80.618	-2.377	0.17627	-0.18848	-0.053711	NaN	NaN	NaN	NaN	NaN	NaN
2.256	-49.773	7.7296	1364.837	-1.8179	1.5345	-0.22598	-26.002	-117.117	1550.8101	-1.0327	0.84619	-0.23193	0.949999999999999	56.1062	22.831	0.16504	-0.18066	-0.052246	NaN	NaN	NaN	NaN	NaN	NaN
2.258	-47.888	10.00588	1337.9791	-1.7481	1.4757	-0.21739	-13.237	-175.2736	1567.9766	-1.1089	0.87744	-0.25244	-10.683	81.875	24.464	0.1377	-0.15918	-0.057129	NaN	NaN	NaN	NaN	NaN	NaN
2.26	-15.865	5.11953	1336.1143	-1.6816	1.4141	-0.20605	8.331	-173.1998	1611.928	-1.2964	0.95947	-0.28711	17.21	35.8202	46.549	0.12402	-0.13697	-0.062745	NaN	NaN	NaN	NaN	NaN	NaN
2.262	-24.077	9.4633	1318.982	-1.6298	1.3487	-0.19268	2.13399999999999	-128.9404	1562.9964	-1.4829	1.0572	-0.29956	26.111	68.814	38.524	0.10645	-0.12549	-0.065918	NaN	NaN	NaN	NaN	NaN	NaN
2.264	-12.455	4.746	1308.89966	-1.5867	1.292	-0.18007	12.946	-143.138	1537.922	-1.7065	1.1782	-0.31006	25.934	24.6239	74.805	0.088867	-0.099609	-0.072754	NaN	NaN	NaN	NaN	NaN	NaN
2.266	-23.735	-1.088	1299.975	-1.5496	1.2416	-0.17773	20.852	-76.6293	1539.589	-2.0449	1.3672	-0.31641	10.293	28.205	70.187	0.080566	-0.098145	-0.07959	NaN	NaN	NaN	NaN	NaN	NaN
2.268	-20.905	-1.161	1280.372	-1.5101	1.2153	-0.17637	-26.283	-47.5884	1498.849	-2.2104	1.4692	-0.31934	6.331	-6.2352	99.462	0.074707	-0.091797	-0.080566	NaN	NaN	NaN	NaN	NaN	NaN
2.27	-35.887	19.1003	1271.9202	-1.478	1.1841	-0.18848	-21.557	-41.6272	1543.0574	-2.5405	1.6724	-0.3042	18.697	27.1449	42.692337	0.069092	-0.093262	-0.09082	NaN	NaN	NaN	NaN	NaN	NaN
2.272	-73.219	43.144	1253.3559	-1.4517	1.1566	-0.1877	-18.295	13.802	1539.5476	-2.7331	1.8069	-0.27759	24.476	14.11643	43.7633	0.066406	-0.097168	-0.098633	NaN	NaN	NaN	NaN	NaN	NaN
2.274	-49.283	51.35	1239.9058	-1.4344	1.1344	-0.18809	-67.601	-33.535	1527.4389	-2.8652	1.9297	-0.2334	10.131	26.9968	39.20615	0.070801	-0.099121	-0.10547	NaN	NaN	NaN	NaN	NaN	NaN
2.276	-58.33	65.217	1214.0397	-1.4168	1.1113	-0.18301	-66.096	-20.1685	1566.6055	-2.9121	2.0371	-0.16797	-16.375	-9.6223	38.611	0.070313	-0.096191	-0.11182	NaN	NaN	NaN	NaN	NaN	NaN
2.278	-59.001	63.371	1199.4979	-1.4019	1.0919	-0.18545	-70.796	38.9621	1530.966	-2.8374	2.0767	-0.12842	-22.165	15.425	20.767	0.0625	-0.091797	-0.12354	NaN	NaN	NaN	NaN	NaN	NaN
2.28	-104.3081	63.1834	1182.1491	-1.3887	1.0703	-0.18652	-114.9182	13.953	1541.014	-2.8706	2.0669	-0.19385	4.024	3.655	36.3873	0.048584	-0.078613	-0.12842	NaN	NaN	NaN	NaN	NaN	NaN
2.282	-85.6442	63.3741	1161.603	-1.3735	1.0492	-0.18974	-94.118	72.7773	1572.4346	-2.8162	2.0764	-0.2434	-35.225	14.362	42.5	0.030273	-0.067383	-0.12939	NaN	NaN	NaN	NaN	NaN	NaN
2.284	-78.594	77.6398	1146.42	-1.3558	1.0248	-0.19082	-153.163	60.54	1555.129	-2.6558	2.0239	-0.18848	-57.3142	-18.7935	71.544	-0.0043945	-0.040527	-0.13428	NaN	NaN	NaN	NaN	NaN	NaN
2.286	-80.1731	86.679	1121.12	-1.3327	1.0072	-0.19277	-144.015	-12.044783	1585.222	-2.4448	1.8677	-0.088379	-72.378	-0.691000000000003	49.981	-0.029297	-0.02832	-0.13477	NaN	NaN	NaN	NaN	NaN	NaN
2.288	-77.359	81.298	1107.1642	-1.3103	0.98916	-0.19541	-124.702	14.875	1585.025	-2.3211	1.7854	-0.08667	-100.414	13.549	-1.171	-0.071777	0.0083008	-0.13574	NaN	NaN	NaN	NaN	NaN	NaN
2.29	-71.3654	85.8172	1087.293	-1.293	0.97266	-0.19775	-144.203	-24.336	1575.299	-2.1968	1.7056	-0.087402	-84.1891	33.6106	-5.849	-0.099856	0.024414	-0.13452	NaN	NaN	NaN	NaN	NaN	NaN
2.292	-76.9752	86.8002	1086.7877	-1.2718	0.96299	-0.19619	-112.5123	-15.463	1599.3	-2.0488	1.6074	-0.091797	-104.159	22.779	27.996	-0.12549	0.050293	-0.13623	NaN	NaN	NaN	NaN	NaN	NaN
2.294	-93.7222	104.2077	1079.2011	-1.2524	0.94375	-0.18945	-99.002	37.071	1550.4726	-1.9839	1.5532	-0.090332	-98.721239	24.226	22.786	-0.15186	0.07666	-0.13965	NaN	NaN	NaN	NaN	NaN	NaN
2.296	-89.0697	103.363	1097.45	-1.2305	0.9289	-0.18867	-124.7865	7.35599999999999	1524.8754	-1.8784	1.4458	-0.075684	-100.141	12.8789	25.276	-0.15918	0.087402	-0.14355	NaN	NaN	NaN	NaN	NaN	NaN
2.298	-67.4604	108.052	1066.4464	-1.2084	0.91328	-0.1834	-114.7384	69.5529	1512.562	-1.8066	1.3798	-0.07251	-78.8429	0.997999999999998	48.327	-0.16992	0.11182	-0.14795	NaN	NaN	NaN	NaN	NaN	NaN
2.3	-67.0925	112.893	1038.3736	-1.1836	0.89746	-0.17871	-95.3162	79.453	1506.6997	-1.748	1.3223	-0.084961	-99.668	-9.6703	111.929	-0.16895	0.1228	-0.15771	NaN	NaN	NaN	NaN	NaN	NaN
2.302	-56.6316	115.4823	1009.2458	-1.1598	0.88086	-0.17412	-84.54	80.361	1528.845	-1.6675	1.2563	-0.104	-72.882	37.926	178.692	-0.1626	0.13379	-0.16748	NaN	NaN	NaN	NaN	NaN	NaN
2.304	-57.75522	113.73909	985.334	-1.1312	0.86338	-0.16943	-62.284	165.604	1510.807	-1.6343	1.229	-0.11768	-59.723	89.914	280.834	-0.1543	0.13428	-0.18701	NaN	NaN	NaN	NaN	NaN	NaN
2.306	-11.653	117.9317	985.0209	-1.105	0.83955	-0.16396	-76.8433	141.359	1468.9809	-1.5894	1.1821	-0.12793	-23.505	123.9842	409.168	-0.14648	0.13428	-0.19629	NaN	NaN	NaN	NaN	NaN	NaN
2.308	4.343	122.534	956.4254	-1.0834	0.81582	-0.16035	-54.65	144.158	1455.9222	-1.5652	1.1468	-0.13916	-27.3376	119.66	580.644	-0.14209	0.14063	-0.21631	NaN	NaN	NaN	NaN	NaN	NaN
2.31	6.458	116.6628	933.8807	-1.0591	0.79248	-0.15674	-41.623	156.957	1404.6664	-1.5425	1.1187	-0.14453	38.758	82.6582	774.867	-0.1604	0.15186	-0.23291	NaN	NaN	NaN	NaN	NaN	NaN
2.312	24.113	119.0896	908.7274	-1.036	0.76806	-0.15683	-45.23	96.707	1381.7122	-1.5098	1.0801	-0.15527	48.588	67.442	966.091	-0.2041	0.16406	-0.25684	NaN	NaN	NaN	NaN	NaN	NaN
2.314	25.498	132.0418	902.757587	-1.0175	0.74883	-0.15117	18.557	138.3325	1375.4891	-1.4863	1.0645	-0.16113	69.106	44.2147	1184.1946	-0.29346	0.18994	-0.27783	NaN	NaN	NaN	NaN	NaN	NaN
2.316	30.278	136.294	877.264	-1.0039	0.73125	-0.14882	7.19	128.5864	1341.379	-1.4492	1.0313	-0.16064	41.606	22.401	1345.7671	-0.36182	0.20947	-0.28076	NaN	NaN	NaN	NaN	NaN	NaN
2.318	3.232	143.26	871.08	-0.99336	0.70859	-0.14433	20.103	96.023	1346.458	-1.4238	1.0088	-0.16553	17.225	-16.814	1458.31	-0.5459	0.27295	-0.30029	NaN	NaN	NaN	NaN	NaN	NaN
2.32	16.737	138.023	838.7674	-0.97852	0.69141	-0.14258	37.471	129.4803	1330.523	-1.4058	0.98877	-0.16455	-9.96299999999999	-49.047	1530.652	-0.79102	0.36719	-0.33691	NaN	NaN	NaN	NaN	NaN	NaN
2.322	15.5783	141.527	811.0758	-0.96621	0.67617	-0.13369	10.374	91.299	1310.1436	-1.3804	0.97705	-0.16846	-41.654	-101.819	1566.356	-0.93213	0.4292	-0.3501	NaN	NaN	NaN	NaN	NaN	NaN
2.324	7.979	134.576	804.2455	-0.9542	0.66416	-0.13076	27.368	118.511	1301.587	-1.3687	0.97314	-0.1626	-90.55	-93.551	1563.242	-1.2554	0.59033	-0.36475	NaN	NaN	NaN	NaN	NaN	NaN
2.326	-14.214	136.0579	778.9507	-0.93896	0.64541	-0.12295	6.818	146.7165	1264.932	-1.3555	0.96289	-0.16406	-87.522	-150.643	1581.758	-1.5293	0.74219	-0.34717	NaN	NaN	NaN	NaN	NaN	NaN
2.328	6.43	135.9918	742.3091	-0.91758	0.63008	-0.12168	-59.6043	118.0354	1240.061	-1.3474	0.96655	-0.1643	-131.788	-183.978	1547.609	-1.8354	0.89502	-0.31104	NaN	NaN	NaN	NaN	NaN	NaN
2.33	15.902	146.944	703.5729	-0.89648	0.61523	-0.1167	-33.63	178.039	1207.2226	-1.3354	0.96143	-0.1665	-134.035	-254.85	1520.915	-2.3008	1.1309	-0.22314	NaN	NaN	NaN	NaN	NaN	NaN
2.332	-12.03	141.915	684.6799	-0.86709	0.59815	-0.11133	-22.207	181.5308	1153.497	-1.3179	0.95459	-0.16797	-166.206	-242.74	1431.684	-2.5527	1.2773	-0.18652	NaN	NaN	NaN	NaN	NaN	NaN
2.334	-14.3	141.3456	682.9666	-0.84326	0.57715	-0.1083	-24.4046	175.411	1142.547	-1.3042	0.94385	-0.16504	-146.386	-246.426	1389.095	-3.0132	1.6313	-0.13818	NaN	NaN	NaN	NaN	NaN	NaN
2.336	-1.979	139.2923	666.6207	-0.81904	0.55684	-0.10322	7.316	224.3592	1125.511	-1.2754	0.92383	-0.16113	-154.494	-184.394	1318.713	-3.2429	1.8996	-0.095949	NaN	NaN	NaN	NaN	NaN	NaN
2.338	-30.7644	143.9068	640.127	-0.78906	0.52939	-0.099122	-56.33	196.1846	1097.491	-1.2468	0.89917	-0.15601	-166.1421	-163.843	1323.986	-3.353	2.1099	-0.088379	NaN	NaN	NaN	NaN	NaN	NaN
2.34	-56.552	143.636813	620.6392	-0.75684	0.50049	-0.095703	-26.728	211.6933	1071.883	-1.2168	0.86914	-0.1543	-237.49	-101.741	1290.016	-3.2051	2.2188	-0.15234	NaN	NaN	NaN	NaN	NaN	NaN
2.342	-61.2207	138.9335	599.9687	-0.73447	0.47041	-0.085645	-38.1236	235.021	1016.916	-1.1719	0.83008	-0.14795	-241.789	-106.954	1273.285	-2.9858	2.1782	-0.2041	NaN	NaN	NaN	NaN	NaN	NaN
2.344	-57.4348	141.024	559.259	-0.70225	0.43819	-0.094434	-71.347	190.07371	1005.7726	-1.146	0.81299	-0.14404	-224.936	-111.997	1269.416	-2.377	1.8965	-0.3291	NaN	NaN	NaN	NaN	NaN	NaN
2.346	-80.302	147.9763	532.845	-0.67686	0.40889	-0.094824	-36.304	212.682	975.84612	-1.1021	0.7583	-0.14111	-230.081	-153.387	1313.368	-1.8889	1.57	-0.40845	NaN	NaN	NaN	NaN	NaN	NaN
2.348	-65.9777	138.6123	510.5183	-0.65059	0.37588	-0.09375	-65.031	202.903	928.574	-1.0681	0.72803	-0.13892	-265.175	-172.422	1295.499	-1.459	1.2305	-0.46875	NaN	NaN	NaN	NaN	NaN	NaN
2.35	-69.5791	134.5197	489.14259	-0.62158	0.3457	-0.09375	-76.128	207.0886	913.5758	-1.0352	0.69531	-0.13184	-227.499	-204.327	1292.634	-1.0737	0.87158	-0.50732	NaN	NaN	NaN	NaN	NaN	NaN
2.352	-40.509	140.5183	449.3666	-0.59844	0.31719	-0.091992	-33.9107	238.901	897.774	-0.99219	0.65039	-0.13574	-205.629	-229.5073	1296.281	-0.9624	0.76221	-0.51221	NaN	NaN	NaN	NaN	NaN	NaN
2.354	-32.8025	142.1786	429.8802	-0.56953	0.28945	-0.09082	-30.6622	201.83193	894.9306	-0.9707	0.62891	-0.13477	-163.354	-285.155	1364.159	-0.86279	0.62939	-0.51123	NaN	NaN	NaN	NaN	NaN	NaN
2.356	-22.969	136.0376	417.15463	-0.54102	0.26484	-0.092773	-13.169	205.4243955	879.429	-0.92334	0.59424	-0.13037	-116.193	-350.772	1416.342	-0.83325	0.59961	-0.52222	NaN	NaN	NaN	NaN	NaN	NaN
2.358	0.164000000000001	130.6414	393.2489	-0.50928	0.24092	-0.095508	27.2806	225.99	802.8656	-0.88769	0.56445	-0.12866	-95.4727	-390.748	1437.709	-0.78809	0.58398	-0.52539	NaN	NaN	NaN	NaN	NaN	NaN
2.36	11.147	132.6447	380.6651	-0.47412	0.21973	-0.098633	26.5468	193.6717	769.11	-0.84912	0.5376	-0.13379	-55.439	-391.71	1468.314	-0.69727	0.56934	-0.50293	NaN	NaN	NaN	NaN	NaN	NaN
2.362	-1.056	134.1168	349.9482	-0.44053	0.19473	-0.098144	56.823	224.636	741.563	-0.7959	0.49902	-0.12402	-31.577	-355.777	1511.983	-0.64746	0.56641	-0.48633	NaN	NaN	NaN	NaN	NaN	NaN
2.364	-11.154	116.4988	339.2268	-0.40518	0.17295	-0.10166	36.452	221.8491	684.3156	-0.76318	0.48291	-0.13184	-8.83300000000001	-333.58	1566.043	-0.58203	0.56201	-0.45557	NaN	NaN	NaN	NaN	NaN	NaN
2.366	-5.544	121.302	322.2716	-0.36807	0.15459	-0.10362	35.3082	202.332	641.0834	-0.70508	0.44043	-0.12695	32.631	-275.7687	1571.013	-0.56787	0.55395	-0.43383	NaN	NaN	NaN	NaN	NaN	NaN
2.368	2.083	124.874	290.6396	-0.33516	0.13662	-0.10469	88.967	218.6857	596.018	-0.65406	0.41138	-0.1289	62.771	-240.787	1601.278	-0.59082	0.5498	-0.40625	NaN	NaN	NaN	NaN	NaN	NaN
2.37	-1.748	125.061	275.5618	-0.30469	0.11426	-0.1084	24.8984	196.549	561.158	-0.60254	0.38086	-0.13135	48.6122	-209.139	1621.879	-0.71143	0.59424	-0.35596	NaN	NaN	NaN	NaN	NaN	NaN
2.372	8.98	118.225	256.70446	-0.27304	0.097852	-0.10654	43.1036	216.795	556.494	-0.53418	0.33594	-0.13086	38.712	-193.572	1656.1012	-0.80615	0.62939	-0.32568	NaN	NaN	NaN	NaN	NaN	NaN
2.374	8.939	106.0548	239.0436	-0.24805	0.080469	-0.1083	42.0525	253.485	505.2442	-0.49805	0.31396	-0.12695	46.82	-120.501	1655.1148	-1.0669	0.74268	-0.30225	NaN	NaN	NaN	NaN	NaN	NaN
2.376	26.945	100.3174	217.441	-0.225	0.073047	-0.10791	20.5869	229.298	466.372	-0.42676	0.2666	-0.13135	69.558	-79.351	1662.184	-1.2868	0.84253	-0.30981	NaN	NaN	NaN	NaN	NaN	NaN
2.378	17.374	87.5415	227.2694	-0.20078	0.062012	-0.10342	68.246	233.383	437.1727	-0.37793	0.23047	-0.12988	95.5258	-8.83399999999999	1666.958	-1.5	0.94922	-0.33984	NaN	NaN	NaN	NaN	NaN	NaN
2.38	8.105	89.3607	199.9009	-0.18018	0.058594	-0.10889	8.798	190.605	404.903	-0.32715	0.19336	-0.12988	98.0477	-37.72	1700.774	-1.7554	1.1235	-0.41748	NaN	NaN	NaN	NaN	NaN	NaN
2.382	9.312	89.0293	175.321	-0.1626	0.048242	-0.11035	13.99	163.013	388.0456	-0.26709	0.14502	-0.12793	60.333	-25.303	1721.865	-1.873	1.2246	-0.46729	NaN	NaN	NaN	NaN	NaN	NaN
2.384	-3.059	96.4748	169.3364	-0.14424	0.043359	-0.10537	25.387	165.144	346.5981	-0.23584	0.12549	-0.12988	40.425	-105.5996	1774.3878	-2.0859	1.4609	-0.5625	NaN	NaN	NaN	NaN	NaN	NaN
2.386	-35.033	91.776	160.6024	-0.12549	0.041015	-0.10381	-17.412	143.992	309.7588	-0.17822	0.083496	-0.12354	7.558	-83.1695	1839.271	-2.2449	1.6272	-0.6145	NaN	NaN	NaN	NaN	NaN	NaN
2.388	-34.918	83.535	163.329186	-0.11211	0.038672	-0.10527	-20.664	146.362	293.8406	-0.1394	0.057617	-0.13061	-1.363	-127.913	1899.453	-2.4038	1.7798	-0.64209	NaN	NaN	NaN	NaN	NaN	NaN
2.39	-38.5419	78.7709	150.5229	-0.093262	0.039551	-0.104	-35.6908	133.5254	248.3476	-0.10303	0.024414	-0.13135	-47.5182	-92.006	1905.896	-2.6128	1.9399	-0.64893	NaN	NaN	NaN	NaN	NaN	NaN
2.392	-74.9465	78.5277	151.3724	-0.080371	0.040527	-0.10136	-55.9372	109.958	220.798	-0.055664	-0.00097656	-0.12939	-78.543	-140.676	1913.847	-2.709	2	-0.6582	NaN	NaN	NaN	NaN	NaN	NaN
2.394	-58.0535	73.625	142.7042	-0.065137	0.039843	-0.10069	-35.501	128.082729	214.0014	-0.040039	-0.016113	-0.13086	-81.551	-104.75	1881.4423	-2.8452	2.0884	-0.67139	NaN	NaN	NaN	NaN	NaN	NaN
2.396	-59.7847	60.6156	125.578	-0.054199	0.035156	-0.09873	-76.033	122.0995	192.9068	-0.0097656	-0.042969	-0.12939	-103.277	-140.303	1891.238	-2.8689	2.1057	-0.69214	NaN	NaN	NaN	NaN	NaN	NaN
2.398	-50.079	63.97298	97.897	-0.041406	0.03125	-0.10049	-80.266	98.504	196.443	0.0031738	-0.060303	-0.12988	-116.979	-69.212	1902.567	-2.8354	2.0864	-0.72021	NaN	NaN	NaN	NaN	NaN	NaN
2.4	-69.02432	67.9769	104.8642	-0.03125	0.03125	-0.10254	-39.9649	96.5986	177.0046	0.015625	-0.073242	-0.12891	-85.611	-80.572	1874.253	-2.7168	1.9805	-0.75586	NaN	NaN	NaN	NaN	NaN	NaN
2.402	-51.707	58.3829	105.9706	-0.020605	0.028223	-0.1001	-91.606	80.659	142.3021	0.015137	-0.086426	-0.12793	-91.235	4.864	1826.652	-2.646	1.9263	-0.76514	NaN	NaN	NaN	NaN	NaN	NaN
2.404	-50.16	51.8731	101.3742	-0.013183	0.022559	-0.095215	-52.9339	84.962	121.3724	0.016113	-0.091309	-0.12646	-109.341	-12.486	1808.522	-2.5288	1.8599	-0.771	NaN	NaN	NaN	NaN	NaN	NaN
2.406	-48.9866	64.4797	80.5596	-0.0045899	0.019825	-0.091309	-24.747	96.7009	82.088	0.011719	-0.095703	-0.12793	-95.351	54.792	1796.503	-2.5173	1.8801	-0.78589	NaN	NaN	NaN	NaN	NaN	NaN
2.408	-53.06947	61.8605	90.1288	0.0032226	0.014355	-0.090039	-58.9476	78.707	58.9817	0.0065918	-0.095947	-0.12623	-54.5181	38.581	1789.72455	-2.5488	1.9512	-0.78906	NaN	NaN	NaN	NaN	NaN	NaN
2.41	-47.0821	55.5997	91.34994	0.0024414	0.0083008	-0.084961	-28.658	89.8754	58.40003	0	-0.099609	-0.12891	-62.102	111.0596	1761.1264	-2.5835	2.061	-0.73682	NaN	NaN	NaN	NaN	NaN	NaN
2.412	-21.163	62.536	77.1353	0.0045899	0.0041016	-0.078906	-52.1553	62.8069	37.775	-0.0078125	-0.09375	-0.12354	-53.761	91.9902	1734.278	-2.5664	2.0684	-0.70313	NaN	NaN	NaN	NaN	NaN	NaN
2.414	-33.451	63.325	70.5051	0.0046875	0.00078125	-0.074121	-22.494	37.184	56.5043	-0.0043945	-0.091309	-0.11963	-52.327	137.958	1715.957	-2.4351	1.9653	-0.67334	NaN	NaN	NaN	NaN	NaN	NaN
2.416	-36.757	56.37	68.7539	0.0058594	-0.0011718	-0.062793	48.5309	31.8271	61.8955	-0.0097656	-0.084473	-0.12646	-19.912	103.328	1711.225	-2.2859	1.8177	-0.67456	NaN	NaN	NaN	NaN	NaN	NaN
2.418	-15.475	43.956	74.386	0.0095702	-0.010254	-0.061523	-19	21.5082	38.3147	-0.011475	-0.078858	-0.12524	7.40600000000001	128.039	1705.024	-2.1328	1.6797	-0.69141	NaN	NaN	NaN	NaN	NaN	NaN
2.42	-15.267	48.0409	60.0687	0.010742	-0.011719	-0.063965	19.907	25.9195	46.13161	-0.012207	-0.081543	-0.12207	16.242	82.372	1697.128	-1.9648	1.5234	-0.7207	NaN	NaN	NaN	NaN	NaN	NaN
2.422	0.200000000000003	54.1506	50.1783	0.012793	-0.020801	-0.054688	27.901	42.746	24.729	-0.019531	-0.077148	-0.12646	29.321	105.2327	1680.5438	-1.9004	1.4551	-0.72656	NaN	NaN	NaN	NaN	NaN	NaN
2.424	6.036	43.4075	51.9852	0.018848	-0.026563	-0.05166	-7.945	34.1176	10.0147	-0.023926	-0.077637	-0.12354	31.7609	58.221	1695.788	-1.8101	1.354	-0.70654	NaN	NaN	NaN	NaN	NaN	NaN
2.426	10.952	39.8058	55.4684	0.023144	-0.035156	-0.048145	40.91	11.3367	21.9923	-0.036621	-0.070313	-0.11816	46.927	123.906	1664.637	-1.7822	1.3095	-0.68457	NaN	NaN	NaN	NaN	NaN	NaN
2.428	-4.079	42.5457	35.8623	0.028613	-0.038574	-0.040332	11.433	5.6012	11.8411	-0.044678	-0.070313	-0.11548	66.686	120.536	1656.937	-1.7695	1.2891	-0.65527	NaN	NaN	NaN	NaN	NaN	NaN
2.43	8.287	32.58069	45.1991	0.03125	-0.047363	-0.036133	5.75	10.3494	34.418	-0.053711	-0.066895	-0.11182	75.082	176.296	1592.532	-1.7754	1.2891	-0.63281	NaN	NaN	NaN	NaN	NaN	NaN
2.432	0.0790000000000006	24.2928	45.3632	0.034863	-0.056933	-0.035059	50.6358	26.866	24.908	-0.061035	-0.064453	-0.10254	62.073	166.5403	1562.3525	-1.7793	1.3008	-0.61865	NaN	NaN	NaN	NaN	NaN	NaN
2.434	-10.48	24.8981	48.9135	0.034668	-0.0625	-0.030176	-15.25	33.4563	11.108	-0.071777	-0.065918	-0.096194	23.847	209.7159	1525.5545	-1.7617	1.3154	-0.60156	NaN	NaN	NaN	NaN	NaN	NaN
2.436	-15.668	24.8838	30.8275	0.037403	-0.071093	-0.032129	4.14	26.1151	22.1891	-0.077148	-0.063965	-0.087402	-28.61	213.848	1506.2412	-1.7309	1.3139	-0.58838	NaN	NaN	NaN	NaN	NaN	NaN
2.438	-41.138	30.6429	39.1649	0.034961	-0.078223	-0.030762	-30.072	40.387	-1.392	-0.084961	-0.062012	-0.07959	-40.624	271.69	1465.2897	-1.6934	1.3047	-0.5752	NaN	NaN	NaN	NaN	NaN	NaN
2.44	-40.317	33.121	55.0105	0.032227	-0.084961	-0.028809	-52.074	40.239	2.8178	-0.083496	-0.060547	-0.068359	-63.689	262.701	1444.846	-1.6172	1.2695	-0.54492	NaN	NaN	NaN	NaN	NaN	NaN
2.442	-47.6382	32.628	36.4159	0.031836	-0.091602	-0.031739	8.395	47.157	19.22116	-0.078613	-0.054688	-0.050781	-89.096	300.599	1394.731	-1.5781	1.252	-0.53418	NaN	NaN	NaN	NaN	NaN	NaN
2.444	-47.232	31.7862	22.99591	0.024317	-0.091797	-0.035937	-59.6806	43.81	18.0587	-0.080078	-0.050781	-0.037842	-124.76161	282.336	1362.568	-1.5034	1.1938	-0.50928	NaN	NaN	NaN	NaN	NaN	NaN
2.446	-59.5272	23.8211	36.5286	0.027051	-0.094531	-0.034765	-83.1961	33.7615	49.968	-0.081055	-0.047363	-0.022949	-146.2511	300.836	1279.5042	-1.4541	1.1484	-0.4917	NaN	NaN	NaN	NaN	NaN	NaN
2.448	-35.98	21.6607	41.1852	0.023145	-0.096777	-0.039941	-49.3874	41.9809	40.1622	-0.069824	-0.043457	-0.0039063	-172.071	264.571	1250.376	-1.3979	1.1001	-0.4751	NaN	NaN	NaN	NaN	NaN	NaN
2.45	-68.40551	17.5407	31.4678	0.018066	-0.091797	-0.041016	-105.528	40.3337	18.8198	-0.067871	-0.043945	0.0019531	-163.5413	279.526	1216.0426	-1.3237	1.0317	-0.44775	NaN	NaN	NaN	NaN	NaN	NaN
2.452	-72.7871	22.291	19.9823	0.015723	-0.089258	-0.04502	-59.1278	22.526	39.315	-0.060547	-0.045898	0.016113	-177.551	263.228	1196.7663	-1.2866	1.0083	-0.43506	NaN	NaN	NaN	NaN	NaN	NaN
2.454	-63.2456	19.7423	24.7304	0.011817	-0.088965	-0.047851	-65.6357	19.022	36.2843	-0.051026	-0.053711	0.028808	-172.68	270.624	1124.226	-1.2085	0.95557	-0.40674	NaN	NaN	NaN	NaN	NaN	NaN
2.456	-62.3467	13.6951	48.1375	0.010645	-0.081934	-0.049414	-107.766	16.015	36.376	-0.04248	-0.059082	0.039063	-193.421	246.830079	1085.7432	-1.154	0.92407	-0.39013	NaN	NaN	NaN	NaN	NaN	NaN
2.458	-49.6303	22.9401	28.4887	0.0083008	-0.079394	-0.054688	-39.046	24.1669	35.2779	-0.022949	-0.07373	0.052246	-212.583	258.925	1048.7868	-1.0996	0.89063	-0.36914	NaN	NaN	NaN	NaN	NaN	NaN
2.46	-61.4353	23.714	25.5172	0.0043945	-0.078125	-0.056152	-55.0105	28.9493	18.708	-0.010254	-0.07959	0.056641	-225.538	235.355	1021.283	-1.0205	0.84375	-0.3418	NaN	NaN	NaN	NaN	NaN	NaN
2.462	-51.483	24.9815	34.8702	0.0073242	-0.069141	-0.061816	-66.3532	17.577	36.654	0.013184	-0.09668	0.067383	-193.386	253.563	972.541	-0.97803	0.81689	-0.32959	NaN	NaN	NaN	NaN	NaN	NaN
2.464	-57.2532	16.27295	35.3492	0.0050781	-0.062695	-0.066699	-33.089	15.7437	48.6475	0.029541	-0.10938	0.069335	-194.327	243.7406	904.023	-0.88428	0.7583	-0.3042	NaN	NaN	NaN	NaN	NaN	NaN
2.466	-49.594	26.4892	51.8677	0.0074219	-0.056055	-0.079199	-57.8025	32.6819	29.03971	0.044434	-0.11719	0.064941	-149.6251	260.167	841.962	-0.81592	0.70703	-0.27856	NaN	NaN	NaN	NaN	NaN	NaN
2.468	-23.135	4.45867	60.7793	0.0091795	-0.049805	-0.079004	-0.5	28.39829	49.388	0.067871	-0.13184	0.065918	-136.7286	249.4233	780.615	-0.75	0.6582	-0.26025	NaN	NaN	NaN	NaN	NaN	NaN
2.47	-15.893	-20.3454	73.304	0.013184	-0.044434	-0.089844	-5.664	42.921	46.6404	0.077637	-0.13428	0.063965	-102.139	270.024	742.1454	-0.66602	0.59082	-0.23584	NaN	NaN	NaN	NaN	NaN	NaN
2.472	-2.329	-16.1693	91.58	0.014649	-0.037695	-0.095313	-32.094	26.3711	46.164	0.09082	-0.14844	0.064453	-84.411	259.1904	677.7833	-0.6062	0.54834	-0.21069	NaN	NaN	NaN	NaN	NaN	NaN
2.474	-3.511	-13.546	98.6687	0.019629	-0.029589	-0.1044	21.624	11.3446	34.2193	0.10132	-0.15527	0.064453	-26.378	259.394	624.5696	-0.55225	0.50049	-0.18652	NaN	NaN	NaN	NaN	NaN	NaN
2.476	15.027	4.7899	140.7708	0.022363	-0.020605	-0.10909	14.579	33.8967	-4.328	0.10791	-0.16162	0.055664	-51.108	217.9101	563.52	-0.479	0.45166	-0.15381	NaN	NaN	NaN	NaN	NaN	NaN
2.478	25.186	5.5426	225.1186	0.027832	-0.014649	-0.11475	12.845	13.892	8.251	0.11133	-0.1709	0.053711	-38.255	239.58045	544.1305	-0.44678	0.43018	-0.13965	NaN	NaN	NaN	NaN	NaN	NaN
2.48	31.956	-0.500999999999999	261.174	0.025879	-0.0063477	-0.12305	39.362	10.7061	31.2342	0.1167	-0.17334	0.049316	-6.319	236.141	494.28	-0.38281	0.38525	-0.11035	NaN	NaN	NaN	NaN	NaN	NaN
2.482	64.14	-0.87386	327.378	0.02959	0.00039062	-0.13222	-9.116	13.7521	35.1809	0.11768	-0.1792	0.036621	14.769	257.5191	446.314	-0.33447	0.35303	-0.088135	NaN	NaN	NaN	NaN	NaN	NaN
2.484	62.016	22.4429	444.28	0.027246	0.0042969	-0.14013	33.24	1.121	42.836	0.11768	-0.18384	0.029297	-11.452	239.224	380.09	-0.28809	0.32324	-0.06543	NaN	NaN	NaN	NaN	NaN	NaN
2.486	65.92	18.256	544.5689	0.015918	0.010938	-0.15537	15.945	10.3846	33.2589	0.12012	-0.18408	0.019043	-5.278	230.081	364.464	-0.21924	0.29297	-0.03418	NaN	NaN	NaN	NaN	NaN	NaN
2.488	30.9268	14.9529	592.9046	0.0093748	0.024414	-0.16445	-22.026	8.8734	35.4602	0.11328	-0.19336	0.0092773	-12.101	203.578	328.206	-0.1875	0.27588	-0.023926	NaN	NaN	NaN	NaN	NaN	NaN
2.49	36.70479	6.659	614.5986	-0.015625	0.039551	-0.17334	12.994	2.6513	46.264	0.11377	-0.18799	0.00097656	1.786	231.859	317.7179	-0.11865	0.24707	0.0058594	NaN	NaN	NaN	NaN	NaN	NaN
2.492	0.365000000000002	-20.53	700.385	-0.047852	0.056348	-0.18779	-46.725	23.3756	-3.172	0.10693	-0.19043	-0.010742	4.392	214.477	276.26502	-0.078614	0.21924	0.028564	NaN	NaN	NaN	NaN	NaN	NaN
2.494	-31.686	-29.187	792.429	-0.084862	0.069629	-0.18906	-23.633	6.004	7.579	0.10498	-0.18848	-0.021973	-22.573	209.662	273.802	-0.041016	0.19287	0.038086	NaN	NaN	NaN	NaN	NaN	NaN
2.496	-58.469	-20.568	854.951	-0.1372	0.091113	-0.20273	-15.1	7.158	20.359	0.10059	-0.18506	-0.03125	-38.221	159.62739	207.858	0.011719	0.1582	0.057129	NaN	NaN	NaN	NaN	NaN	NaN
2.498	-87.839	11.6976	896.3604	-0.20537	0.1127	-0.21885	-83.05	16.2982	22.0365	0.088867	-0.18262	-0.044922	-68.305	160.238	178.4448	0.033691	0.14502	0.062988	NaN	NaN	NaN	NaN	NaN	NaN
2.5	-122.986	-2.4019	939.8853	-0.28613	0.13818	-0.23096	-39.306	7.218	35.4737	0.083984	-0.1748	-0.050293	-83.198	148.534	114.093	0.064453	0.10596	0.078613	NaN	NaN	NaN	NaN	NaN	NaN
2.502	-160.2401	-29.8324	956.5061	-0.38448	0.1709	-0.24023	-44.2259	30.785	12.636	0.073242	-0.16016	-0.064941	-64.5918	161.5121	120.808	0.083985	0.081543	0.087647	NaN	NaN	NaN	NaN	NaN	NaN
2.504	-138.3903	-56.8156	967.3707	-0.50459	0.21347	-0.25157	-90.409	47.0664	18.6957	0.062256	-0.14648	-0.075196	-71.979	138.7614	89.513	0.086426	0.058105	0.099121	NaN	NaN	NaN	NaN	NaN	NaN
2.506	-127.702	-61.869	995.1828	-0.65029	0.27168	-0.25391	-51.7297	29.9727	29.79	0.04834	-0.12793	-0.077637	-120.925	138.137	116.632	0.07666	0.022949	0.11279	NaN	NaN	NaN	NaN	NaN	NaN
2.508	-130.8885	-30.9392	1051.805	-0.81875	0.34776	-0.25313	-88.21	47.07	6.651	0.02832	-0.10547	-0.088867	-109.6571	122.56	78.7811	0.063965	0.010254	0.12061	NaN	NaN	NaN	NaN	NaN	NaN
2.51	-160.598	12.209	1067.26	-1.0059	0.43359	-0.25	-91.5821	11.744	8.7408	0.018066	-0.094238	-0.091797	-120.27	114.461	81.41132	0.025879	-0.015137	0.13965	NaN	NaN	NaN	NaN	NaN	NaN
2.512	-152.7846	25.117	1031.476	-1.2091	0.54317	-0.24219	-43.343	14.2889	10.2325	0.00048828	-0.08252	-0.10156	-133.922	82.258	67.738	-0.014404	-0.0271	0.1543	NaN	NaN	NaN	NaN	NaN	NaN
2.514	-144.3593	16.001	1001.791	-1.434	0.6668	-0.23095	-86.04	26.7094	13.98	-0.010742	-0.060303	-0.1062	-132.016	55.022	81.474	-0.064453	-0.036621	0.16455	NaN	NaN	NaN	NaN	NaN	NaN
2.516	-162.1871	-24.7119	1027.888	-1.6527	0.81211	-0.21572	-28.217	-9.2019	66.6431	-0.022949	-0.045898	-0.10693	-97.7088	47.3902	39.1393	-0.12354	-0.043457	0.18506	NaN	NaN	NaN	NaN	NaN	NaN
2.518	-142.6035	-44.816	1048.716	-1.8662	0.96171	-0.21143	-33.981	-16.355	63.554	-0.035156	-0.024414	-0.11377	-90.017	43.7455	52.361	-0.15039	-0.041992	0.19287	NaN	NaN	NaN	NaN	NaN	NaN
2.52	-158.3412	-57.559	1059.8621	-2.0522	1.1294	-0.20264	-72.9466	-12.5002	82.9554	-0.036133	-0.012207	-0.11914	-64.26772	27.785	24.9075	-0.20459	-0.041992	0.20313	NaN	NaN	NaN	NaN	NaN	NaN
2.522	-148.622	-74.6957	1048.393	-2.2164	1.2929	-0.20303	15.816	-13.65	129.0634	-0.045898	0.01123	-0.13086	-64.9155	3.584	48.4383	-0.24195	-0.030274	0.21093	NaN	NaN	NaN	NaN	NaN	NaN
2.524	-147.215	-86.816	1025.7771	-2.321	1.4747	-0.2002	-3.803	32.1123	164.6404	-0.057129	0.031739	-0.14331	-34.27	-10.763	35.375	-0.28125	-0.02002	0.22119	NaN	NaN	NaN	NaN	NaN	NaN
2.526	-124.557	-102.701	1029.6565	-2.3648	1.6466	-0.19316	0.639999999999997	22.1665	246.6246	-0.069824	0.052734	-0.15576	-3.918	-8.9534	46.7185	-0.32422	-0.0063477	0.22412	NaN	NaN	NaN	NaN	NaN	NaN
2.528	-71.3941	-115.5155	1021.222	-2.3453	1.7543	-0.21094	35.2854	31.9407	333.734	-0.097168	0.081543	-0.16309	21.694	7.632	54.9053	-0.34863	0.0053711	0.22363	NaN	NaN	NaN	NaN	NaN	NaN
2.53	-49.26	-122.31163	1050.424	-2.2617	1.7754	-0.25244	8.2249	68.949	430.643	-0.11816	0.096191	-0.16895	6.666	-11.5508	83.888	-0.39014	0.024902	0.22363	NaN	NaN	NaN	NaN	NaN	NaN
2.532	-13.972	-140.8996	1091.0321	-2.109	1.6926	-0.30556	66.583	81.9283	608.665	-0.17236	0.12598	-0.17578	20.288	-7.1325	79.049	-0.41846	0.040039	0.22485	NaN	NaN	NaN	NaN	NaN	NaN
2.534	0.602999999999998	-157.866	1117.08849	-1.9083	1.5489	-0.34932	60.032	85.157	737.583	-0.22607	0.1543	-0.17432	-0.0339999999999989	-21.7504	70.294	-0.44971	0.052246	0.23193	NaN	NaN	NaN	NaN	NaN	NaN
2.536	29.9241	-145.764	1121.2233	-1.6884	1.3665	-0.36338	31.9247	70.2481	863.64029	-0.29248	0.18506	-0.18555	42.938	7.794	16.07406	-0.48145	0.065918	0.23047	NaN	NaN	NaN	NaN	NaN	NaN
2.538	33.9899	-137.594	1128.344	-1.5075	1.1925	-0.36338	67.178	36.3283	988.5113	-0.41504	0.24561	-0.18994	31.119	12.8221	9.187	-0.49951	0.07373	0.2373	NaN	NaN	NaN	NaN	NaN	NaN
2.54	42.631	-143.2902	1122.3353	-1.3687	1.0552	-0.36279	13.462	37.341	1070.928506	-0.48779	0.27686	-0.19287	34.802	39.0792	-2.188	-0.52246	0.084961	0.2417	NaN	NaN	NaN	NaN	NaN	NaN
2.542	53.004	-145.882	1110.4847	-1.2681	0.96045	-0.35107	-29.074	11.069	1181.713	-0.65967	0.34619	-0.19385	22.508	26.8174	2.513	-0.5315	0.093018	0.25538	NaN	NaN	NaN	NaN	NaN	NaN
2.544	35.022	-136.403	1130.8648	-1.2016	0.90371	-0.35693	-17.325	-19.612	1228.541	-0.82373	0.41065	-0.18799	49.449	52.9776	5.9943	-0.53662	0.1001	0.26025	NaN	NaN	NaN	NaN	NaN	NaN
2.546	33.331	-121.367	1168.942	-1.1402	0.87129	-0.36905	-104.263	-50.1649	1228.367	-1.0195	0.48926	-0.16797	12.48	18.867	3.3792	-0.53076	0.11035	0.2666	NaN	NaN	NaN	NaN	NaN	NaN
2.548	35.4743	-131.937	1209.9776	-1.0657	0.84414	-0.38145	-113.586	-110.985	1253.461	-1.353	0.61084	-0.14893	6.04499999999999	19.5417	15.11291	-0.51514	0.10938	0.27295	NaN	NaN	NaN	NaN	NaN	NaN
2.55	51.836	-147.564	1239.2239	-0.97168	0.81982	-0.39404	-166.17	-130.852	1264.705	-1.5425	0.68311	-0.12842	-23.386	-7.7857	26.2594	-0.47021	0.10693	0.27539	NaN	NaN	NaN	NaN	NaN	NaN
2.552	48.327	-152.518	1234.3591	-0.87178	0.78975	-0.39482	-217.899	-151.05	1275.617	-1.9492	0.84375	-0.10156	-32.672	42.8814	9.809	-0.4209	0.099364	0.27002	NaN	NaN	NaN	NaN	NaN	NaN
2.554	35.9202	-144.9323	1243.10882	-0.78115	0.74892	-0.3917	-159.886	-161.066	1274.132	-2.2481	0.98878	-0.077392	-66.9112	48.944	-3.523	-0.35742	0.081543	0.26514	NaN	NaN	NaN	NaN	NaN	NaN
2.556	38.16962	-127.7249	1258.1534	-0.70029	0.70635	-0.38193	-196.2933	-127.279	1205.198	-2.5293	1.1719	-0.053223	-44.496	66.2914	9.653	-0.25684	0.047363	0.2583	NaN	NaN	NaN	NaN	NaN	NaN
2.558	26.04584	-130.912	1261.3432	-0.64365	0.66338	-0.36299	-205.236	-137.533	1170.474	-2.873	1.4824	-0.024414	-110.471	18.1093	10.8638	-0.20166	0.021484	0.25488	NaN	NaN	NaN	NaN	NaN	NaN
2.56	-0.1648	-135.51	1305.969	-0.6084	0.625	-0.34082	-160.2176	-94.661	1161.0028	-3.0176	1.6523	-0.029785	-113.167	30.9276	28.23089	-0.093262	-0.029297	0.24854	NaN	NaN	NaN	NaN	NaN	NaN
2.562	-16.3283	-142.349	1345.948	-0.59443	0.59483	-0.3207	-205.573	-51.096	1138.3916	-3.1812	1.9575	-0.064941	-110.497	21.6242	16.444	-0.015625	-0.068603	0.23975	NaN	NaN	NaN	NaN	NaN	NaN
2.564	1.1924	-143.38	1372.411	-0.58741	0.57315	-0.30703	-203.425	-45.658	1154.6028	-3.145	2.064	-0.093263	-95.217	58.752	26.3156	0.056641	-0.11426	0.23242	NaN	NaN	NaN	NaN	NaN	NaN
2.566	-16.63473	-129.51	1359.6386	-0.59482	0.55517	-0.30391	-184.255	-12.223	1129.433	-2.9819	2.0591	-0.15088	-81.1579	35.52	53.533	0.15137	-0.16162	0.20947	NaN	NaN	NaN	NaN	NaN	NaN
2.568	-51.54	-105.2845	1366.5715	-0.59785	0.53311	-0.31836	-215.288	-63.442	1104.262	-2.5742	1.8926	-0.25977	-107.634	57.325	56.996	0.19287	-0.18555	0.2041	NaN	NaN	NaN	NaN	NaN	NaN
2.57	-44.9046	-102.382	1371.60749	-0.60693	0.50537	-0.3335	-168.968	-121.39	1122.194	-2.3237	1.77	-0.30762	-108.6758	39.0583	21.5973	0.271	-0.22559	0.18848	NaN	NaN	NaN	NaN	NaN	NaN
2.572	-38.7098	-112.715	1391.2219	-0.62461	0.48496	-0.34355	-190.978	-141.885	1099.739	-1.834	1.4512	-0.36816	-76.821	59.511	9.905	0.32324	-0.25708	0.17846	NaN	NaN	NaN	NaN	NaN	NaN
2.574	-29.047	-108.749	1389.1157	-0.65713	0.46865	-0.3503	-159.9	-189.57145	1107.697	-1.4766	1.1738	-0.42773	-64.1737	38.5429	30.7297	0.37158	-0.27881	0.16602	NaN	NaN	NaN	NaN	NaN	NaN
2.576	-15.250896	-111.1321	1400.3477	-0.72081	0.47295	-0.34678	-71.481	-203.734	1140.091	-1.3481	1.0532	-0.45264	-81.7202	64.7019	65.42	0.43066	-0.30469	0.15234	NaN	NaN	NaN	NaN	NaN	NaN
2.578	13.152332	-108.552	1389.795	-0.82481	0.50215	-0.34121	-107.3464	-237.1764	1155.449	-1.1577	0.90088	-0.51514	-39.372	43.08224	67.718	0.45313	-0.31641	0.14258	NaN	NaN	NaN	NaN	NaN	NaN
2.58	-11.65264	-107.885	1395.649	-0.95068	0.56494	-0.33301	-52.569	-290.518	1185.656	-1.0283	0.83105	-0.55225	-18.311	62.338	60.017	0.49219	-0.34229	0.1333	NaN	NaN	NaN	NaN	NaN	NaN
2.582	2.3697	-81.096	1389.36	-1.1013	0.65331	-0.32881	5.2	-291.934	1230.492	-0.89258	0.76953	-0.57813	-12.208	22.2364	55.136	0.51367	-0.34839	0.12573	NaN	NaN	NaN	NaN	NaN	NaN
2.584	6.1855	-77.525	1386.573	-1.2558	0.75486	-0.34257	10.187	-302.29	1287.869	-0.70508	0.69531	-0.60449	-23.084	6.2011	63.894	0.52588	-0.35791	0.12012	NaN	NaN	NaN	NaN	NaN	NaN
2.586	52.941	-61.0865	1421.6835	-1.4039	0.86539	-0.36835	45.925	-272.801	1361.891	-0.61719	0.64844	-0.61182	13.269	-19.9049	65.131	0.52588	-0.36279	0.11768	NaN	NaN	NaN	NaN	NaN	NaN
2.588	72.431	-60.716	1435.179	-1.5512	0.97848	-0.40468	37.176	-204.0465	1364.117	-0.43945	0.5918	-0.57813	23.727	11.48649	71.5756	0.521	-0.36084	0.11279	NaN	NaN	NaN	NaN	NaN	NaN
2.59	72.53	-60.409	1445.2519	-1.6777	1.0898	-0.44727	34.156	-192.1525	1352.664	-0.3601	0.52368	-0.60279	66.27623	3.253	39.3605	0.50049	-0.34766	0.11719	NaN	NaN	NaN	NaN	NaN	NaN
2.592	71.335	-67.859	1444.9681	-1.8044	1.1977	-0.48283	50.9046	-154.316	1391.501	-0.28906	0.47754	-0.61377	29.415	0.632999999999999	54.0033	0.47608	-0.33105	0.11402	NaN	NaN	NaN	NaN	NaN	NaN
2.594	75.489	-49.189	1446.27764	-1.9267	1.3107	-0.49033	23.976	-151.347	1412.6245	-0.22412	0.42822	-0.57568	19.547	-22.401	29.0422	0.44043	-0.31348	0.12061	NaN	NaN	NaN	NaN	NaN	NaN
2.596	82.548	-39.047	1434.2459	-2.0439	1.4216	-0.49503	64.918	-184.354	1454.781	-0.2168	0.41797	-0.55957	14.413	-7.549	25.72661	0.39453	-0.27979	0.13037	NaN	NaN	NaN	NaN	NaN	NaN
2.598	76.645	-45.361	1427.5689	-2.161	1.5326	-0.49531	76.6219	-153.324	1440.825	-0.26611	0.41064	-0.51904	55.214	3.263	12.7457	0.37549	-0.26172	0.13232	NaN	NaN	NaN	NaN	NaN	NaN
2.6	94.371	-39.32012	1422.8792	-2.2617	1.6348	-0.50488	15.182	-137.52	1428.133	-0.3545	0.42529	-0.50781	15.776	12.6655	41.3007	0.33105	-0.21777	0.14258	NaN	NaN	NaN	NaN	NaN	NaN
2.602	96.04	-36.095919	1433.4718	-2.332	1.7092	-0.52067	13.394	-125.697	1463.986	-0.4751	0.46631	-0.49805	-3.425	8.79448	45.165	0.29419	-0.18628	0.14575	NaN	NaN	NaN	NaN	NaN	NaN
2.604	80.219	-27.5382	1425.5403	-2.3617	1.752	-0.53725	6.365	-94.436	1459.822	-0.69775	0.56104	-0.479	-29.462	4.8423	45.0743	0.26367	-0.15967	0.15234	NaN	NaN	NaN	NaN	NaN	NaN
2.606	68.558	-15.4186	1434.951788	-2.3447	1.7426	-0.54745	-39.775	-132.292	1491.3017	-0.82617	0.61719	-0.4707	-27.207	14.82	-14.8872	0.22754	-0.12207	0.15674	NaN	NaN	NaN	NaN	NaN	NaN
2.608	48.3948	-1.9388	1431.7567	-2.2772	1.6936	-0.556	-17.358	-140.9822	1556.915	-1.0874	0.74268	-0.44775	-63.7865	38.478	-15.462	0.21387	-0.10449	0.15479	NaN	NaN	NaN	NaN	NaN	NaN
2.61	47.156	7.2897	1418.9042	-2.1714	1.6196	-0.56689	-82.71	-167.403	1581.423	-1.2683	0.83716	-0.43579	-55.983	56.9394	-21.7432	0.1875	-0.081055	0.16113	NaN	NaN	NaN	NaN	NaN	NaN
2.612	39.5765	5.5341	1419.1085	-2.0411	1.5238	-0.56736	-80.794	-199	1630.792	-1.439	0.94873	-0.44092	-95.66229	42.1	13.268	0.16992	-0.058593	0.16187	NaN	NaN	NaN	NaN	NaN	NaN
2.614	13.36518	24.1004	1421.965	-1.8966	1.4188	-0.56046	-69.109	-138.649	1621.399	-1.6499	1.106	-0.48584	-74.8092	50.4508	-14.019	0.15234	-0.046875	0.16748	NaN	NaN	NaN	NaN	NaN	NaN
2.616	-16.415	29.8183	1429.7528	-1.7713	1.3165	-0.55242	-121.797	-139.948	1604.668	-1.7515	1.1841	-0.52246	-101.476	32.4668	4.67	0.13135	-0.037109	0.15576	NaN	NaN	NaN	NaN	NaN	NaN
2.618	-30.708	41.921	1408.6455	-1.6824	1.2267	-0.55106	-88.532	-124.571	1619.393	-1.9507	1.3423	-0.57861	-97.27	32.023	14.0573	0.12354	-0.030762	0.15527	NaN	NaN	NaN	NaN	NaN	NaN
2.62	-30.361	40.4447	1377.747	-1.6191	1.166	-0.54688	-88.234	-87.817	1584.373	-2.1036	1.4415	-0.62012	-113.499	-0.742800000000001	59.851	0.10352	-0.025879	0.15479	NaN	NaN	NaN	NaN	NaN	NaN
2.622	-51.905	39.95452	1361.97409	-1.58	1.1228	-0.53594	-106.303	-104.498	1579.1096	-2.2671	1.5337	-0.64893	-104.8597	33.377	27.1209	0.060547	-0.011719	0.14355	NaN	NaN	NaN	NaN	NaN	NaN
2.624	-38.0072	28.5752	1355.7464	-1.5569	1.0856	-0.52786	-45.37	-79.07813	1602.9444	-2.4961	1.6543	-0.6582	-102.356	36.681	10.36	0.040039	-0.0058594	0.14307	NaN	NaN	NaN	NaN	NaN	NaN
2.626	-62.4002	35.717	1339.091	-1.5471	1.0577	-0.51524	-82.785	-82.226	1605.3804	-2.5991	1.7085	-0.65576	-55.7843	77.083	5.652	-0.0048828	0.013672	0.13867	NaN	NaN	NaN	NaN	NaN	NaN
2.628	-38.2286	43.298	1308.589	-1.5492	1.0394	-0.49943	-48.5336	-85.19	1623.822	-2.7534	1.8032	-0.65137	-59.0939	40.825	51.1833	-0.040039	0.031982	0.13208	NaN	NaN	NaN	NaN	NaN	NaN
2.63	-42.0672	39.544	1297.8197	-1.5464	1.0298	-0.48682	-7.8729	-25.5317	1594.039	-2.7783	1.8233	-0.64453	-62.882	64.2368	53.823	-0.078125	0.054199	0.12939	NaN	NaN	NaN	NaN	NaN	NaN
2.632	-38.3633	47.653	1289.4707	-1.5517	1.0301	-0.47383	-12.6512	-12.1824	1540.937	-2.7515	1.7935	-0.65332	-63.021	31.6831	40.671	-0.1167	0.085938	0.125	NaN	NaN	NaN	NaN	NaN	NaN
2.634	-45.4663	56.5332	1286.8205	-1.5465	1.0296	-0.46618	39.6459	10.8706	1558.898	-2.6343	1.731	-0.64404	-22.761	56.9732	32.883	-0.13867	0.1001	0.12207	NaN	NaN	NaN	NaN	NaN	NaN
2.636	-31.683	72.3135	1260.6195	-1.5402	1.0333	-0.45249	31.275	43.2322	1577.195	-2.5801	1.7188	-0.64844	-29.424	19.029	64.292	-0.17529	0.12744	0.11816	NaN	NaN	NaN	NaN	NaN	NaN
2.638	-24.915	86.965	1250.29075	-1.5231	1.0355	-0.43757	20.2196	12.5	1624.529	-2.5303	1.752	-0.70313	3.385	45.11	98.208	-0.20239	0.1438	0.11084	NaN	NaN	NaN	NaN	NaN	NaN
2.64	-19.08	90.101	1230.1113	-1.5093	1.0317	-0.42529	82.227	14.437	1646.299	-2.4863	1.7925	-0.71142	10.567	30.704	69.175	-0.22803	0.16357	0.11279	NaN	NaN	NaN	NaN	NaN	NaN
2.642	5.902	91.258	1202.54284	-1.4923	1.0249	-0.41582	66.819	-5.3075	1618.2718	-2.4219	1.8359	-0.68555	23.604	74.177	33.9172	-0.25439	0.18262	0.10596	NaN	NaN	NaN	NaN	NaN	NaN
2.644	-5.033	85.588	1185.4436	-1.481	1.018	-0.4037	61.282	-40.062	1611.1074	-2.2964	1.8364	-0.646	26.481	27.0946	45.8599	-0.26563	0.18945	0.10303	NaN	NaN	NaN	NaN	NaN	NaN
2.646	2.213	87.7692	1165.5428	-1.4705	1.011	-0.38854	119.88	-4.27998	1588.1565	-2.2202	1.811	-0.63428	30.024	7.17236	94.4759	-0.29248	0.20654	0.092773	NaN	NaN	NaN	NaN	NaN	NaN
2.648	6.616	108.1457	1135.1704	-1.4584	0.99915	-0.37339	69.142	7.172	1558.6146	-2.0679	1.6899	-0.63037	13.618	-69.3861	128.2845	-0.30005	0.21851	0.08667	NaN	NaN	NaN	NaN	NaN	NaN
2.65	36.52	116.4838	1102.1471	-1.4453	0.98828	-0.35742	104.293	10.297	1560.99	-1.9639	1.5674	-0.62402	43.763	-9.6279	174.6194	-0.31299	0.22607	0.075195	NaN	NaN	NaN	NaN	NaN	NaN
2.652	37.022	108.16604	1087.3946	-1.4304	0.97621	-0.34759	80.792	29.3271	1554.8997	-1.875	1.457	-0.61133	68.3021	-21.46762	238.8179	-0.32568	0.23438	0.060059	NaN	NaN	NaN	NaN	NaN	NaN
2.654	50.453	109.4104	1094.2199	-1.4074	0.95735	-0.33741	22.84969	8.229	1552.697	-1.7949	1.3301	-0.60156	-18.459	-11.4392	341.288	-0.32959	0.24316	0.046875	NaN	NaN	NaN	NaN	NaN	NaN
2.656	33.018	105.805	1072.5846	-1.3834	0.94056	-0.32675	80.217	38.1916	1553.513	-1.7749	1.2837	-0.59033	-77.976	-69.545	457.1318	-0.33984	0.26172	0.020508	NaN	NaN	NaN	NaN	NaN	NaN
2.658	3.495	107.0496	1042.1457	-1.3528	0.91831	-0.31936	30.052	94.7852	1506.6765	-1.7495	1.2144	-0.58105	-55.991	4.037	589.211	-0.35205	0.28272	0.0021972	NaN	NaN	NaN	NaN	NaN	NaN
2.66	9.183	113.573	1042.348	-1.3179	0.88818	-0.31592	11.417	111.3209	1499.4634	-1.742	1.1858	-0.56079	-30.266	10.565	780.275	-0.37793	0.29736	-0.021973	NaN	NaN	NaN	NaN	NaN	NaN
2.662	-14.314	127.543	1034.346	-1.2765	0.85734	-0.31415	-9.545	148.925	1473.539	-1.7363	1.1748	-0.55078	-49.28	54.988	1019.812	-0.44189	0.32275	-0.055176	NaN	NaN	NaN	NaN	NaN	NaN
2.664	-17.264	140.034	997.8791	-1.2341	0.82142	-0.30756	-80.531	148.336	1434.5062	-1.7305	1.1738	-0.54492	-64.291	-31.2453	1181.3	-0.4873	0.33691	-0.073242	NaN	NaN	NaN	NaN	NaN	NaN
2.666	-19.505	135.274	954.6982	-1.1936	0.78869	-0.30748	-47.10437	132.288	1439.641	-1.7183	1.1743	-0.53662	-65.1505	-48.825	1279.701	-0.60303	0.37744	-0.12158	NaN	NaN	NaN	NaN	NaN	NaN
2.668	-56.5419	124.4157	924.9116	-1.1582	0.76001	-0.29559	-78.115	164.167	1415.4439	-1.6831	1.1802	-0.521	-68.695	-92.7159	1358.9298	-0.72022	0.41797	-0.15088	NaN	NaN	NaN	NaN	NaN	NaN
2.67	-74.3261	108.943	920.1238	-1.126	0.73047	-0.28809	-100.561	127.5709	1382.0016	-1.6355	1.174	-0.50976	-119.982	-55.723	1441.079	-0.86133	0.46387	-0.18066	NaN	NaN	NaN	NaN	NaN	NaN
2.672	-59.4676	112.024	891.9862	-1.0927	0.70871	-0.2753	-79.2501	123.74308	1370.197	-1.5889	1.1563	-0.5	-127.889	-72.111	1490.248	-1.0898	0.53809	-0.20801	NaN	NaN	NaN	NaN	NaN	NaN
2.674	-69.9541	119.995	856.8601	-1.0645	0.6887	-0.2671	-140.912	141.9001	1328.77	-1.521	1.1274	-0.47119	-91.1352	-101.763	1478.214	-1.2246	0.58105	-0.20996	NaN	NaN	NaN	NaN	NaN	NaN
2.676	-90.358	135.034	838.3369	-1.0402	0.67149	-0.25773	-117.394	103.415	1315.645	-1.4902	1.1055	-0.46143	-14.7431	-151.141	1371.315	-1.5327	0.69189	-0.18506	NaN	NaN	NaN	NaN	NaN	NaN
2.678	-74.9717	135.9565	812.6128	-1.014	0.65635	-0.25293	-89.9911	122.432	1297.24	-1.4375	1.0625	-0.44336	-14.718	-165.644	1334.093	-1.7939	0.79589	-0.15381	NaN	NaN	NaN	NaN	NaN	NaN
2.68	-78.7902	141.1772	799.7267	-0.98584	0.63721	-0.24463	-145.071	134.087	1248.42518	-1.3989	1.0279	-0.42652	28.636	-226.582	1306.9993	-2.0718	0.90869	-0.12061	NaN	NaN	NaN	NaN	NaN	NaN
2.682	-84.7703	150.7941	784.43	-0.95351	0.62265	-0.23857	-103.685	142.8258	1259.249	-1.3691	0.99316	-0.4082	34.587	-281.45	1288.894	-2.4663	1.0747	-0.09668	NaN	NaN	NaN	NaN	NaN	NaN
2.684	-91.136	156.076	762.7218	-0.92372	0.60048	-0.23388	-101.4171	204.104	1228.5187	-1.3257	0.9458	-0.38623	60.545	-249.166	1234.168	-2.6401	1.1724	-0.091309	NaN	NaN	NaN	NaN	NaN	NaN
2.686	-72.514	153.72	728.8251	-0.89091	0.58018	-0.22412	-91.5749	208.6978	1182.3834	-1.3047	0.93164	-0.37793	67.023	-216.401	1234.3182	-2.896	1.3755	-0.07373	NaN	NaN	NaN	NaN	NaN	NaN
2.688	-72.109	149.6067	685.387	-0.85839	0.5582	-0.21768	-16.003	215.326	1170.9409	-1.2676	0.9043	-0.35986	92.74	-121.963	1204.765	-2.9734	1.4983	-0.052002	NaN	NaN	NaN	NaN	NaN	NaN
2.69	-82.9425	146.42991	663.357	-0.82227	0.5293	-0.21387	-51.904	224.015	1147.1086	-1.2329	0.88038	-0.34277	99.003	-88.1	1235.105	-2.9453	1.6084	-0.012207	NaN	NaN	NaN	NaN	NaN	NaN
2.692	-33.714	139.4918	649.80563	-0.79365	0.50654	-0.20439	-26.3	176.7838	1142.656	-1.1992	0.86426	-0.33008	94.916	-71	1243.183	-2.7305	1.6855	0.061035	NaN	NaN	NaN	NaN	NaN	NaN
2.694	-33.621	144.9477	607.6886	-0.76641	0.48907	-0.18653	5.435	205.895	1098.9451	-1.1538	0.8335	-0.30322	53.702	-111.84	1256.19768	-2.5703	1.6855	0.091309	NaN	NaN	NaN	NaN	NaN	NaN
2.696	-10.036	140.9923	584.4195	-0.7379	0.46719	-0.17637	-20.688	220.352	1037.8888	-1.1343	0.81104	-0.29395	35.473	-124.632	1269.3498	-2.2104	1.6177	0.12207	NaN	NaN	NaN	NaN	NaN	NaN
2.698	-17.784	142.0127	568.5494	-0.71367	0.44551	-0.16485	26.57	190.16	1005.99584	-1.0815	0.77393	-0.2666	68.91	-185.933	1306.762	-1.9497	1.522	0.1438	NaN	NaN	NaN	NaN	NaN	NaN
2.7	8.596	135.5067	567.8019	-0.68311	0.42773	-0.15234	16.859	219.774	985.3197	-1.038	0.74072	-0.25024	116.917	-238.992	1326.006	-1.728	1.4224	0.15918	NaN	NaN	NaN	NaN	NaN	NaN
2.702	29.728	141.2442	542.3028	-0.66143	0.41201	-0.14492	-24.213	193.6428	941.0747	-0.99951	0.70605	-0.23486	108.289	-308.5525	1321.9682	-1.5171	1.3071	0.16797	NaN	NaN	NaN	NaN	NaN	NaN
2.704	19.126	142.1421	502.8715	-0.63467	0.39541	-0.13808	25.954	173.584	921.3221	-0.95117	0.65625	-0.21387	140.595	-328.813	1318.7777	-1.4419	1.2603	0.16602	NaN	NaN	NaN	NaN	NaN	NaN
2.706	24.475	134.3998	486.6743	-0.60733	0.38174	-0.13028	-2.78700000000001	197.6026	901.4076	-0.92529	0.63037	-0.20117	125.259	-370.976	1377.3983	-1.3101	1.1704	0.16309	NaN	NaN	NaN	NaN	NaN	NaN
2.708	14.89	142.382	461.9667	-0.57539	0.36787	-0.12393	-19.01	162.769	906.145	-0.87842	0.58252	-0.17822	108.048	-373.059	1451.0401	-1.2111	1.1067	0.15283	NaN	NaN	NaN	NaN	NaN	NaN
2.71	16.63	139.514	439.09168	-0.54688	0.35156	-0.11133	-15.441	185.54	884.409	-0.83862	0.54956	-0.16528	69.087	-408.14	1509.51082	-1.1016	1.0439	0.12939	NaN	NaN	NaN	NaN	NaN	NaN
2.712	-2.654	147.295	417.1847	-0.51143	0.3374	-0.10264	-55.524	229.7631	804.723	-0.79639	0.51709	-0.15479	46.9491	-386.432	1544.892	-0.94971	0.96338	0.084473	NaN	NaN	NaN	NaN	NaN	NaN
2.714	-0.304000000000002	137.442	402.361	-0.48516	0.31797	-0.094922	-38.106	204.3268	752.83	-0.74316	0.4707	-0.13281	-19.572	-353.883	1558.928	-0.87646	0.91846	0.060547	NaN	NaN	NaN	NaN	NaN	NaN
2.716	0.576000000000001	129.0027	383.7899	-0.45196	0.29961	-0.086328	-63.315	237.339	721.137419	-0.7124	0.45166	-0.12158	-75.2322	-264.188	1582.692	-0.76221	0.85352	0.01123	NaN	NaN	NaN	NaN	NaN	NaN
2.718	-17.693	129.155	339.933	-0.42031	0.275	-0.078125	-105.7453	203.482	701.448	-0.6543	0.40625	-0.10449	-124.012	-228.2115	1570.531	-0.7185	0.81372	-0.032227	NaN	NaN	NaN	NaN	NaN	NaN
2.72	-31.264	128.348	331.8416	-0.3877	0.25488	-0.070313	-73.512	187.822	673.548	-0.58252	0.36572	-0.086426	-134.878	-167.661	1546.7336	-0.7085	0.7876	-0.063477	NaN	NaN	NaN	NaN	NaN	NaN
2.722	-29.072	121.5096	316.8026	-0.35117	0.23623	-0.06123	-126.766	222.364	613.145	-0.54883	0.34277	-0.077637	-97.078	-146.818	1542.485	-0.75391	0.77148	-0.10352	NaN	NaN	NaN	NaN	NaN	NaN
2.724	-22.988	119.0504	296.8384	-0.31739	0.21553	-0.051758	-114.327	162.717	571.243	-0.48242	0.30322	-0.064453	-51.4194	-118.39	1598.355	-0.79395	0.76465	-0.12598	NaN	NaN	NaN	NaN	NaN	NaN
2.726	-58.1447	119.9684	284.4141	-0.27949	0.19521	-0.049414	-130.7472	168.1691	532.929	-0.42895	0.26977	-0.056396	-50.255	-137.295	1622.662	-0.90332	0.77539	-0.16162	NaN	NaN	NaN	NaN	NaN	NaN
2.728	-57.637	111.444	265.593	-0.24482	0.17588	-0.042188	-177.469	191.8609	469.453	-0.37549	0.24316	-0.046875	-95.652	-130.1837	1629.319	-0.99412	0.792	-0.19947	NaN	NaN	NaN	NaN	NaN	NaN
2.73	-73.506	126.0537	250.064	-0.20703	0.15381	-0.034668	-120.165	161.5885	440.4187	-0.31592	0.20557	-0.032715	-80.9467	-144.918	1612.366	-1.0869	0.8252	-0.22266	NaN	NaN	NaN	NaN	NaN	NaN
2.732	-71.1744	140.889	226.9046	-0.16953	0.13066	-0.031738	-138.844	218.625	412.562	-0.28906	0.18408	-0.027832	-92.1214	-129.74	1633.78	-1.252	0.89648	-0.23389	NaN	NaN	NaN	NaN	NaN	NaN
2.734	-93.06	136.772	216.5962	-0.13496	0.11133	-0.024805	-130.936	189.652	392.454	-0.24658	0.15479	-0.013672	-70.5231	-131.411	1679.4888	-1.3633	0.94922	-0.23486	NaN	NaN	NaN	NaN	NaN	NaN
2.736	-91.1285	124.2053	216.1163	-0.10254	0.089453	-0.020117	-74.4359	149.883776	400.0545	-0.22265	0.1311	-0.0004883	-87.221	-127.1451	1740.2529	-1.646	1.104	-0.23486	NaN	NaN	NaN	NaN	NaN	NaN
2.738	-77.1367	105.0317	195.6503	-0.072266	0.071387	-0.013574	-102.433	197.9249	335.37	-0.20166	0.10889	0.013184	-71.2627	-140.027	1767.7376	-1.9097	1.2578	-0.24415	NaN	NaN	NaN	NaN	NaN	NaN
2.74	-79.847	109.1793	161.773	-0.044434	0.057617	-0.0029297	-50.711	152.901	313.5893	-0.18408	0.086914	0.024414	-92.7523	-139.37176	1801.73	-2.2046	1.4351	-0.24561	NaN	NaN	NaN	NaN	NaN	NaN
2.742	-70.389	94.865	156.7135	-0.018848	0.037695	-0.0054687	-26.547	166.04745	307.4757	-0.17383	0.078125	0.035645	-71.9637	-120.2497	1823.086	-2.6074	1.6855	-0.23828	NaN	NaN	NaN	NaN	NaN	NaN
2.744	-62.62	86.0496	151.0803	0.0029296	0.024414	9.7653e-05	-61.8878	170.7354	251.7136	-0.16309	0.062988	0.044434	-30.176	-89.796	1858.989	-2.791	1.8008	-0.22754	NaN	NaN	NaN	NaN	NaN	NaN
2.746	-34.8	90.7487	153.4854	0.024805	0.01582	0.0047851	-6.864	101.361	248.229	-0.1604	0.053223	0.054931	35.457	-47.1238	1816.768	-3.0625	2.0127	-0.17188	NaN	NaN	NaN	NaN	NaN	NaN
2.748	-20.664	104.9558	127.8946	0.042676	0.0083007	0.012793	4.776	154.642	204.0126	-0.15576	0.04248	0.062988	55.451	-18.442	1761.335	-3.1579	2.1438	-0.12647	NaN	NaN	NaN	NaN	NaN	NaN
2.75	-30.105	90.8021	122.04	0.054688	-0.0014648	0.018555	13.537	121.1924	197.2837	-0.15186	0.039551	0.078125	68.5358	-1.656791	1711.15	-3.1538	2.229	-0.09375	NaN	NaN	NaN	NaN	NaN	NaN
2.752	-4.299	83.897	134.8465	0.067188	-0.0036133	0.022363	44.46	96.1163	190.2091	-0.14893	0.041992	0.082031	35.918	-9.1885	1727.624	-2.9155	2.1626	-0.015137	NaN	NaN	NaN	NaN	NaN	NaN
2.754	1.973	74.7696	143.753	0.076758	-0.0083985	0.025879	11.484	153.544	148.447	-0.15039	0.045898	0.094238	68.538	31.302	1715.7572	-3.0234	2.1152	-0.16016	NaN	NaN	NaN	NaN	NaN	NaN
2.756	-4.787	85.9527	116.8349	0.082617	-0.008789	0.03291	23.183	112.236	128.6713	-0.14697	0.051026	0.10254	34.014	39.4261	1704.401	-2.894	2.1743	-0.28564	NaN	NaN	NaN	NaN	NaN	NaN
2.758	-2.291	80.4589	96.8991	0.089551	-0.008789	0.038379	37.658	138.975	109.928	-0.14307	0.059082	0.11133	37.019	80.7787	1677.52775	-2.6855	2.0937	-0.19482	NaN	NaN	NaN	NaN	NaN	NaN
2.76	-13.32	71.226	106.1201	0.09082	-0.0092773	0.039551	40.308	153.852	112.6594	-0.1416	0.072754	0.12549	-5.336	79.461	1682.786	-2.5684	1.9766	-0.11621	NaN	NaN	NaN	NaN	NaN	NaN
2.762	0.194000000000003	71.019	81.3893	0.087305	-0.0068359	0.044629	39.712	76.2378	118.857	-0.14355	0.08252	0.13428	2.3	129.623	1669.262	-2.502	1.9297	-0.11572	NaN	NaN	NaN	NaN	NaN	NaN
2.764	5.197	73.5319	77.3776	0.07959	-0.0037109	0.047168	5.197	117.891	89.1776	-0.14111	0.09375	0.14307	-39.9868	115.194	1674.5156	-2.4629	1.9219	-0.11816	NaN	NaN	NaN	NaN	NaN	NaN
2.766	23.604	62.57776	76.55399	0.074121	0.0013672	0.049512	-23.711	99.3217	77.038	-0.13794	0.10351	0.15136	-51.501	130.588	1668.4581	-2.3433	1.8579	-0.11279	NaN	NaN	NaN	NaN	NaN	NaN
2.768	-0.343	61.2413	74.8074	0.066504	0.0010742	0.057129	1.613	66.9936	84.4988	-0.1416	0.11182	0.15576	-81.7392	73.983	1672.0164	-2.24	1.761	-0.11206	NaN	NaN	NaN	NaN	NaN	NaN
2.77	-4.621	64.761	76.0558	0.059082	0.0073242	0.058594	-46.274	115.913	58.586	-0.13965	0.11963	0.1626	-80.726	84.384	1639.2816	-2.1362	1.6392	-0.097656	NaN	NaN	NaN	NaN	NaN	NaN
2.772	-35.874	61.9811	52.49584	0.050879	0.013379	0.060938	-46.984	45.95602	48.3447	-0.1333	0.12158	0.16309	-108.4631	40.555	1632.8317	-2.02	1.4946	-0.073242	NaN	NaN	NaN	NaN	NaN	NaN
2.774	-12.607	48.3859	49.532	0.042774	0.021094	0.062402	-48.211	39.115	36.864	-0.12744	0.125	0.16797	-85.763	81.924	1616.574	-1.955	1.4121	-0.078125	NaN	NaN	NaN	NaN	NaN	NaN
2.776	-29.476	53.989	67.0176	0.04082	0.025	0.065136	-103.06	53.9141	16.507	-0.11744	0.125	0.16967	-97.4103	27.673	1615.718	-1.9004	1.3379	-0.091797	NaN	NaN	NaN	NaN	NaN	NaN
2.778	-43.225	49.931	55.2261	0.031641	0.029101	0.067676	-80.116	-24.3951	44.4171	-0.1084	0.12109	0.17139	-92.2236	54.87	1587.955	-1.834	1.252	-0.098633	NaN	NaN	NaN	NaN	NaN	NaN
2.78	-77.0406	34.4364	55.3057	0.02832	0.033691	0.068359	-106.065	30.4808	37.38191	-0.10059	0.11328	0.1709	-123.017	25.859	1561.873	-1.8047	1.2158	-0.098633	NaN	NaN	NaN	NaN	NaN	NaN
2.782	-73.444	27.6306	46.0018	0.027344	0.031055	0.071777	-115.182	19.677	34.622	-0.094238	0.10596	0.1709	-113.625	105.68	1511.5867	-1.7485	1.1528	-0.092285	NaN	NaN	NaN	NaN	NaN	NaN
2.784	-74.6716	28.8804	44.0639	0.028711	0.026074	0.07207	-82.2228	-5.051	52.031	-0.081055	0.088379	0.1748	-121.428	105.1906	1470.637	-1.7087	1.113	-0.091797	NaN	NaN	NaN	NaN	NaN	NaN
2.786	-97.435	37.9008	41.1994	0.031055	0.019043	0.067774	-107.166	69.7566	21.493	-0.071044	0.07373	0.17456	-100.5942	200.668	1425.152	-1.6655	1.0786	-0.089355	NaN	NaN	NaN	NaN	NaN	NaN
2.788	-68.2895	25.1842	38.435	0.039551	0.0071289	0.068066	-89.401	10.934	29.26308	-0.0625	0.061035	0.17188	-108.396	176.423	1411.928	-1.5928	1.041	-0.09082	NaN	NaN	NaN	NaN	NaN	NaN
2.79	-70.2635	21.6909	32.9994	0.049805	-0.0078125	0.068359	-69.622	40.948	37.675	-0.054199	0.044434	0.16846	-87.704	237.517	1371.6359	-1.5547	1.0186	-0.083008	NaN	NaN	NaN	NaN	NaN	NaN
2.792	-56.4866	16.0419	25.72307	0.058301	-0.017968	0.05957	-96.238	72.4699	23.6927	-0.048828	0.030273	0.16895	-52.9268	192.1122	1350.7373	-1.4624	0.98877	-0.078613	NaN	NaN	NaN	NaN	NaN	NaN
2.794	-61.4799	21.6427	19.1671	0.065527	-0.023242	0.063672	-38.96	-1.1196	40.0955	-0.022949	0.0048828	0.16504	-35.4663	264.7778	1296.5579	-1.3965	0.96729	-0.080078	NaN	NaN	NaN	NaN	NaN	NaN
2.796	-65.8553	19.1168	38.2294	0.075293	-0.03418	0.060156	-29.314	51.369	29.168	-0.0061034	-0.011475	0.16406	3.989	220.6909	1279.7351	-1.332	0.9502	-0.07959	NaN	NaN	NaN	NaN	NaN	NaN
2.798	-50.592	24.4305	43.7977	0.085644	-0.041894	0.058398	-25.303	12.356	27.3077	0.014648	-0.029785	0.15723	67.65	284.98	1230.8974	-1.2578	0.92383	-0.083496	NaN	NaN	NaN	NaN	NaN	NaN
2.8	-42.496	32.886	34.803878	0.095703	-0.04541	0.059082	6.148	-12.2282	41.639	0.046875	-0.054688	0.15039	78.009	212.048	1164.123	-1.2183	0.9165	-0.091309	NaN	NaN	NaN	NaN	NaN	NaN
2.802	-52.7713	34.84	27.3585	0.104	-0.047754	0.058203	-11.859	51.77	28.186	0.064941	-0.068359	0.14746	69.2592	264.028197	1118.553	-1.1563	0.88867	-0.095215	NaN	NaN	NaN	NaN	NaN	NaN
2.804	-35.21	23.8702	30.95062	0.10869	-0.053125	0.062793	35.7875	1.4504	43.46	0.104	-0.091309	0.14209	74.1491	184.76	1108.471	-1.1137	0.87304	-0.094727	NaN	NaN	NaN	NaN	NaN	NaN
2.806	-11.581	23.4943	49.7677	0.11064	-0.05625	0.062793	43.129	13.0571	49.744	0.13282	-0.11646	0.13526	71.9377	251.633	1113.2538	-1.0742	0.85742	-0.097168	NaN	NaN	NaN	NaN	NaN	NaN
2.808	-3.525	28.251	36.5159	0.11211	-0.057422	0.061914	9.407	30.0655	28.81693	0.15967	-0.13135	0.1333	92.404	223.527	1076.39112	-1.0176	0.83203	-0.10156	NaN	NaN	NaN	NaN	NaN	NaN
2.81	-9.493	26.1082	9.6245	0.10938	-0.060547	0.064453	45.025	-42.101	32.3629	0.20361	-0.1582	0.13184	79.957	306.214	1026.2671	-0.99365	0.81885	-0.098145	NaN	NaN	NaN	NaN	NaN	NaN
2.812	21.332	19.6649	16.295	0.11064	-0.056445	0.067675	39.48	20.74165	22.167	0.21826	-0.1748	0.1333	73.804	244.879	981.9127	-0.93555	0.79102	-0.11621	NaN	NaN	NaN	NaN	NaN	NaN
2.814	9.261	17.1821	42.3056	0.10557	-0.053223	0.065625	45.8548	9.205	27.9705	0.25049	-0.19775	0.13672	41.6264	298.229	951.086	-0.89136	0.76392	-0.10718	NaN	NaN	NaN	NaN	NaN	NaN
2.816	19.418	25.1112	21.405	0.098144	-0.051661	0.071484	26.924	-23.235	47.01	0.27173	-0.21802	0.14283	69.415	254.9653	924.627	-0.84326	0.73877	-0.11084	NaN	NaN	NaN	NaN	NaN	NaN
2.818	12.68	23.93408	33.7509	0.089649	-0.04834	0.066699	-4.67899999999999	48.145	19.4079	0.28613	-0.22852	0.14258	43.3257	335.073	878.496	-0.76758	0.69727	-0.11133	NaN	NaN	NaN	NaN	NaN	NaN
2.82	19.187	13.195	44.5302	0.081543	-0.039063	0.065918	18.203	-0.95203	20.658619	0.3042	-0.25049	0.14307	62.474	271.019	829.201	-0.73047	0.6748	-0.11328	NaN	NaN	NaN	NaN	NaN	NaN
2.822	-13.809	21.9871	37.254	0.075097	-0.035547	0.06543	9.404	35.967	22.2193	0.30713	-0.25781	0.14795	49.85197	310.437	789.735	-0.65723	0.62549	-0.11475	NaN	NaN	NaN	NaN	NaN	NaN
2.824	-18.332	30.1253	38.417377	0.066992	-0.027441	0.066407	-42.2788	64.281	11.7467	0.30322	-0.27002	0.14941	47.3361	256.575	736.194	-0.59864	0.58471	-0.11548	NaN	NaN	NaN	NaN	NaN	NaN
2.826	-29.455	26.0434	32.5815	0.056836	-0.019629	0.066015	-48.5727	-12.03992	26.61011	0.30639	-0.27148	0.15161	7.897	324.678	689.371	-0.54688	0.54688	-0.11768	NaN	NaN	NaN	NaN	NaN	NaN
2.828	-26.806	26.8763	34.1917	0.049121	-0.00625	0.064258	-65.6967	49.871	3.48	0.30078	-0.27246	0.15381	-16.3264	273.1074	642.789	-0.47656	0.49316	-0.10889	NaN	NaN	NaN	NaN	NaN	NaN
2.83	-31.513	6.0103	68.4162	0.039063	0	0.061523	-75.647	17.1	-12.521	0.29053	-0.26123	0.16064	-85.952	271.167	622.557	-0.44141	0.46826	-0.11133	NaN	NaN	NaN	NaN	NaN	NaN
2.832	-78.5596723	-28.3366	63.5961	0.030957	0.008789	0.058203	-63.6354	-15.44479	13.703	0.27686	-0.26025	0.16064	-91.534	188.1376	579.617	-0.37549	0.40967	-0.11768	NaN	NaN	NaN	NaN	NaN	NaN
2.834	-66.013	-30.1007	80.399	0.019433	0.018262	0.051758	-103.448	48.514	16.058	0.24805	-0.24414	0.16211	-95.733	219.667	534.0762	-0.31811	0.36792	-0.11841	NaN	NaN	NaN	NaN	NaN	NaN
2.836	-35.133	-3.81	101.2667	0.0096678	0.033105	0.044726	-89.561	8.478	8.7427	0.22265	-0.22559	0.15918	-82.454	188.8455	471.7235	-0.25928	0.32129	-0.12451	NaN	NaN	NaN	NaN	NaN	NaN
2.838	-78.0127	6.5806	180.618	0.0018555	0.044238	0.041016	-91.3764	39.425	15.1489	0.19385	-0.20703	0.16211	-101.531	224.8946	449.467	-0.18896	0.26709	-0.13525	NaN	NaN	NaN	NaN	NaN	NaN
2.84	-128.93533	3.96125	246.102	-0.0087891	0.057617	0.035645	-100.214	60.922	2.74	0.15088	-0.17188	0.16846	-88.247	175.355	406.1394	-0.14941	0.23291	-0.12793	NaN	NaN	NaN	NaN	NaN	NaN
2.842	-137.91779	1.4308	335.871	-0.019434	0.069336	0.027539	-81.958	-12.27	48.202	0.13037	-0.15918	0.17285	-80.0835	180.347	357.4841	-0.07373	0.1665	-0.14209	NaN	NaN	NaN	NaN	NaN	NaN
2.844	-119.375	4.885	459.287	-0.024902	0.081348	0.014941	-80.4888	46.9467	35.2171	0.083496	-0.12109	0.16016	-40.258	146.026	287.2999	-0.026855	0.12012	-0.146	NaN	NaN	NaN	NaN	NaN	NaN
2.846	-131.4729	-1.7963	556.133	-0.038184	0.094238	0.0016602	-55.3307	20.864	14.297	0.056396	-0.096922	0.16944	-24.411	151.769	271.1148	0.018066	0.070313	-0.1543	NaN	NaN	NaN	NaN	NaN	NaN
2.848	-147.029	-28.52642	633.0428	-0.050586	0.11162	-0.0082032	-31.882	-4.4385	26.2435	0.029785	-0.069336	0.1665	13.683	103.762	245.11	0.077637	0.010742	-0.16455	NaN	NaN	NaN	NaN	NaN	NaN
2.85	-126.3844	-32.596	695.75	-0.065918	0.13135	-0.017578	-57.5625	66.745	24.4635	0.0058594	-0.035156	0.16797	-12.533	96.541	222.163	0.10303	-0.018555	-0.16553	NaN	NaN	NaN	NaN	NaN	NaN
2.852	-85.614	-15.454	742.893	-0.093553	0.14483	-0.036035	-35.324	15.9309	26.2021	-0.0073242	-0.020508	0.16162	-13.201	106.741	144.8223	0.13916	-0.074219	-0.16553	NaN	NaN	NaN	NaN	NaN	NaN
2.854	-77.6588	-3.941	790.45866	-0.13037	0.16103	-0.066114	-5.499	39.65	28.689	-0.027344	0.0068359	0.15479	-17.176	119.2553	90.329	0.15332	-0.10766	-0.16577	NaN	NaN	NaN	NaN	NaN	NaN
2.856	-86.456	-8.266	832.7797	-0.17842	0.18408	-0.098144	6.545	73.286	22.7922	-0.037598	0.023438	0.14795	-5.309	112.183	72.482	0.15869	-0.14111	-0.16113	NaN	NaN	NaN	NaN	NaN	NaN
2.858	-19.32835	-26.79	847.2296	-0.23955	0.21142	-0.13194	24.233	-0.1611	44.056	-0.048828	0.041992	0.1416	17.574	112.349	82.344	0.14551	-0.17432	-0.15967	NaN	NaN	NaN	NaN	NaN	NaN
2.86	31.593	-35.3182	901.434	-0.31152	0.24854	-0.16357	22.835	59.937	51.5064	-0.069336	0.061035	0.13428	35.11	108.932	67.924	0.13525	-0.18848	-0.15088	NaN	NaN	NaN	NaN	NaN	NaN
2.862	18.4068	-40.924	937.9416	-0.40723	0.27832	-0.19492	25.125	32.417	34.5278	-0.075195	0.071777	0.13135	63.8628	100.063	46.851	0.092773	-0.20264	-0.15332	NaN	NaN	NaN	NaN	NaN	NaN
2.864	2.5499	-46.715	968.574	-0.52813	0.31836	-0.20762	50.809	9.4834	45.2526	-0.094238	0.089355	0.12354	59.392	93.931	18.292	0.056397	-0.20752	-0.14551	NaN	NaN	NaN	NaN	NaN	NaN
2.866	56.098	-54.5868	976.724	-0.68125	0.37149	-0.2127	25.799	67.622	38.5185	-0.1123	0.10889	0.12354	33.317	67.443	34.1931	0.016113	-0.20654	-0.14648	NaN	NaN	NaN	NaN	NaN	NaN
2.868	73.712	-41.277	985.689	-0.86562	0.45156	-0.21709	26.931	-3.63314	42.855	-0.125	0.11768	0.12451	46.81	69.406	33.6196	-0.035156	-0.19873	-0.14648	NaN	NaN	NaN	NaN	NaN	NaN
2.87	88.292	-28.957	978.849	-1.0757	0.54199	-0.21045	32.366	15.9433	45.452	-0.14063	0.14307	0.11768	67.775	37.9523	32.448	-0.058105	-0.18848	-0.1416	NaN	NaN	NaN	NaN	NaN	NaN
2.872	56.187	5.095	1015.0313	-1.3067	0.64844	-0.20488	-4.644	44.6421	26.4441	-0.15112	0.15796	0.11206	36.311	66.6332	24.277	-0.10645	-0.16162	-0.14404	NaN	NaN	NaN	NaN	NaN	NaN
2.874	66.234	18.58	1015.4093	-1.5309	0.76914	-0.18398	-1.134	-13.7027	43.635	-0.1626	0.17773	0.1084	-3.577	40.3707	38.277	-0.14869	-0.13623	-0.14771	NaN	NaN	NaN	NaN	NaN	NaN
2.876	46.163	7.585	1003.4965	-1.7383	0.90468	-0.15586	-5.965	42.1911	44.2574	-0.16797	0.19922	0.099121	-37.094	56.436	38.5299	-0.19189	-0.10596	-0.15039	NaN	NaN	NaN	NaN	NaN	NaN
2.878	19.4613	-34.632	998.8372	-1.9254	1.0504	-0.13701	-39.198	-11.1558	76.68915	-0.17383	0.20703	0.098633	-50.236	20.7104	40.6959	-0.25195	-0.069336	-0.15039	NaN	NaN	NaN	NaN	NaN	NaN
2.88	19.4614	-68.043	994.3515	-2.0879	1.207	-0.1333	-33.097	-66.074	86.58	-0.1748	0.2251	0.091797	-68.663	66.459	29.29	-0.28516	-0.051758	-0.1582	NaN	NaN	NaN	NaN	NaN	NaN
2.882	35.581	-65.4924	1005.61074	-2.1909	1.3767	-0.14541	-61.3127	-7.0499	105.736	-0.17822	0.23169	0.085937	-62.2657	20.6348	40.321	-0.34375	-0.015625	-0.15918	NaN	NaN	NaN	NaN	NaN	NaN
2.884	39.3095	-86.9838	1010.2632	-2.2254	1.5308	-0.15742	-45.7148	-40.4645	130.8487	-0.1748	0.23975	0.072266	-77.7158	40.43	66.594	-0.39112	0.0048829	-0.15771	NaN	NaN	NaN	NaN	NaN	NaN
2.886	17.864	-123.5464	995.321	-2.1668	1.6262	-0.16758	-76.9985	0.628	204.5939	-0.18164	0.24854	0.054199	-94.227	-7.4413	97.902	-0.43164	0.028809	-0.15625	NaN	NaN	NaN	NaN	NaN	NaN
2.888	17.794	-145.0841	1010.6175	-2.0262	1.641	-0.17617	-137.754	14.5201	263.42	-0.18311	0.25049	0.043457	-112.889	50.7477	82.075	-0.48242	0.055176	-0.14746	NaN	NaN	NaN	NaN	NaN	NaN
2.89	19.051	-162.433	1028.96231	-1.8379	1.5762	-0.18945	-132.51642	-27.7386	369.22	-0.20557	0.25635	0.021973	-106.166	32.707	60.1595	-0.50781	0.0625	-0.14111	NaN	NaN	NaN	NaN	NaN	NaN
2.892	3.962	-154.08	1049.5336	-1.6406	1.4543	-0.21123	-112.18208	56.2444	514.838	-0.22681	0.26636	0.0056153	-96.1475	78.262	41.8484	-0.55225	0.083496	-0.13721	NaN	NaN	NaN	NaN	NaN	NaN
2.894	-18.781	-164.651	1069.927	-1.4628	1.3067	-0.21006	-99.3822	41.033	678.977	-0.26025	0.26758	-0.021484	-86.0079	18.789	28.8585	-0.58154	0.098634	-0.1311	NaN	NaN	NaN	NaN	NaN	NaN
2.896	-66.8178	-176.84	1083.3131	-1.3281	1.1634	-0.19717	-94.3123	-5.101	826.855	-0.32813	0.28906	-0.055176	-106.0559	58.2217	13.533	-0.60742	0.12012	-0.11816	NaN	NaN	NaN	NaN	NaN	NaN
2.898	-84.6798	-159.22	1107.445	-1.2385	1.0313	-0.16699	-90.398	19.5469	874.629	-0.37354	0.30127	-0.075195	-87.419	16.9815	27.0441	-0.63623	0.14453	-0.10059	NaN	NaN	NaN	NaN	NaN	NaN
2.9	-89.583	-128.154	1104.5083	-1.1812	0.92822	-0.12354	-53.3757	-52.5937	926.125	-0.48389	0.33838	-0.1123	-83.69336	42.955	37.794	-0.64941	0.15967	-0.092285	NaN	NaN	NaN	NaN	NaN	NaN
2.902	-86.209	-128.099	1122.8298	-1.1547	0.87207	-0.096486	-57.1965	-25.039	1019.379	-0.59034	0.36939	-0.13746	-79.502	-43.317	67.495	-0.66211	0.18848	-0.069336	NaN	NaN	NaN	NaN	NaN	NaN
2.904	-96.245	-146.174	1142.3796	-1.132	0.84394	-0.083887	-62.276	5.654	1064.109	-0.71094	0.41016	-0.15527	-74.3418	-22.8524	51.3448	-0.66528	0.20679	-0.050781	NaN	NaN	NaN	NaN	NaN	NaN
2.906	-87.2237	-150.692	1156.223	-1.0867	0.83066	-0.070606	-67.723	-45.563	1060.032	-0.90332	0.46729	-0.16406	-38.812	-39.961	42.7299	-0.65283	0.22217	-0.037598	NaN	NaN	NaN	NaN	NaN	NaN
2.908	-84.2738	-133.924	1158.569	-1.0312	0.82412	-0.059668	-1.235	-30.553	1033.051	-1.0171	0.49658	-0.17676	-15.579	29.02408	17.682	-0.60498	0.23584	-0.022461	NaN	NaN	NaN	NaN	NaN	NaN
2.91	-86.7409	-123.9205	1186.057	-0.96826	0.81982	-0.056152	12.332	-89.262	1004.3026	-1.2598	0.56836	-0.18506	23.69	6.342	21.621	-0.57178	0.23242	-0.016602	NaN	NaN	NaN	NaN	NaN	NaN
2.912	-54.61	-126.344	1222.261	-0.91729	0.8124	-0.052051	54.595	-129.034	1063.679	-1.4411	0.63989	-0.17163	13.281	38.67954	20.2695	-0.47656	0.22461	-0.016602	NaN	NaN	NaN	NaN	NaN	NaN
2.914	-41.193	-132.645	1240.3273	-0.87959	0.80674	-0.049609	99.55	-84.482	1055.329	-1.6284	0.71436	-0.15918	17.601	-9.0725	11.96109	-0.38647	0.19506	-0.015625	NaN	NaN	NaN	NaN	NaN	NaN
2.916	-44.96	-147.255	1253.429	-0.8499	0.79892	-0.034766	85.465	-140.139	1016.917	-1.8677	0.83643	-0.14063	39.823	4.608	-7.4726	-0.28516	0.16113	-0.025879	NaN	NaN	NaN	NaN	NaN	NaN
2.918	-50.005	-148.768	1266.505	-0.84268	0.78584	-0.01416	92.209	-107.917	982.484	-1.9741	0.91064	-0.13623	64.399	-17.14928	10.73386	-0.14941	0.10205	-0.035645	NaN	NaN	NaN	NaN	NaN	NaN
2.92	-20.27	-146.2098	1307.057	-0.84375	0.77832	-0.0019531	81.473	-63.144	969.4324	-2.1426	1.0703	-0.11377	44.146	12.7078	29.7572	-0.08252	0.064453	-0.043457	NaN	NaN	NaN	NaN	NaN	NaN
2.922	-36.316	-129.7388	1323.8642	-0.85303	0.75635	-0.0026367	102.092	-60.73	982.534539	-2.2129	1.209	-0.09082	32.506	23.521	38.5987	0.04248	-0.003418	-0.054688	NaN	NaN	NaN	NaN	NaN	NaN
2.924	-45.83	-118.652	1333.838	-0.87002	0.72881	-0.01875	98.631	21.321	1009.9881	-2.23	1.3384	-0.067383	8.60299999999999	64.849	15.29	0.14404	-0.068359	-0.063965	NaN	NaN	NaN	NaN	NaN	NaN
2.926	-20.12	-134.496	1348.9944	-0.87471	0.70069	-0.044532	51.127	-3.28700000000001	1005.6938	-2.1636	1.4478	-0.048828	19.045	59.947	-4.325	0.18604	-0.093262	-0.068848	NaN	NaN	NaN	NaN	NaN	NaN
2.928	9.302	-137.973	1370.8395	-0.88301	0.67676	-0.068359	5.4053	-83.026	1011.097	-2.0938	1.459	-0.047852	-12.09	64.57	5.805	0.25146	-0.1377	-0.073242	NaN	NaN	NaN	NaN	NaN	NaN
2.93	-1.423	-126.7097	1378.5028	-0.88086	0.65137	-0.089844	-26.9735	-88.987	1000.724	-1.8823	1.4185	-0.046875	-33.58	40.366	21.39784	0.28101	-0.16625	-0.079346	NaN	NaN	NaN	NaN	NaN	NaN
2.932	-22.455	-100.0375	1363.9702	-0.88574	0.6291	-0.097656	-25.01821	-177.814	992.129	-1.6863	1.3381	-0.032959	-41.28	46.653	24.1982	0.31885	-0.18506	-0.082031	NaN	NaN	NaN	NaN	NaN	NaN
2.934	-0.582999999999998	-104.947	1363.4086	-0.90029	0.61396	-0.10996	9.101	-205.1817	1015.401	-1.502	1.2402	-0.019531	-28.636	46.818	18.2255	0.35742	-0.22119	-0.087891	NaN	NaN	NaN	NaN	NaN	NaN
2.936	-10.301	-95.009	1355.507	-0.93271	0.60263	-0.12519	4.595	-194.2459	1026.153	-1.3179	1.1099	0	-64.2656	40.2144	31.4223	0.37549	-0.23584	-0.091309	NaN	NaN	NaN	NaN	NaN	NaN
2.938	-38.236	-87.1536	1352.0621	-0.99052	0.6042	-0.13672	5.382	-245.5507	1055.233	-1.2534	1.061	0.0097656	-82.4607	23.179	49.509	0.41211	-0.26807	-0.097168	NaN	NaN	NaN	NaN	NaN	NaN
2.94	-38.8	-85.3429	1344.298	-1.0679	0.61768	-0.14941	3.4345	-229.26	1088.15	-1.1523	0.99023	0.025391	-85.451	17.316	48.163	0.43164	-0.29004	-0.10035	NaN	NaN	NaN	NaN	NaN	NaN
2.942	-50.208	-78.1852	1356.5296	-1.1756	0.62012	-0.15801	-32.375	-250.414	1124.183	-1.0996	0.97266	0.040771	-79.1922	57.9759	35.6185	0.4458	-0.30566	-0.099609	NaN	NaN	NaN	NaN	NaN	NaN
2.944	-66.254	-57.821	1370.063	-1.3031	0.65147	-0.17226	-37.4851	-294.917	1208.217	-1.0562	0.97119	0.04834	-79.3523	62.0194	41.5067	0.44189	-0.32959	-0.11279	NaN	NaN	NaN	NaN	NaN	NaN
2.946	-87.0677	-48.417	1368.697	-1.4483	0.71201	-0.1707	-54.6435	-231.9	1264.163	-0.98779	0.98096	0.041504	-82.7251	68.305	57.616	0.43457	-0.33203	-0.11084	NaN	NaN	NaN	NaN	NaN	NaN
2.948	-98.83151	-59.465	1379.902	-1.6006	0.80254	-0.1584	-69.682369	-230.733	1295.124	-0.95313	0.98047	0.030762	-124.409	29.246	70.784	0.40625	-0.33984	-0.11279	NaN	NaN	NaN	NaN	NaN	NaN
2.95	-111.6832	-73.0108	1384.0732	-1.752	0.91211	-0.14453	-97.5872	-167.251	1337.959	-0.86475	0.98291	0.0053711	-123.89	43.1299	42.6841	0.385	-0.33765	-0.11401	NaN	NaN	NaN	NaN	NaN	NaN
2.952	-113.5143	-65.0564	1382.66997	-1.8936	1.054	-0.13017	-130.37	-104.328	1316.02621	-0.80102	0.96656	-0.015625	-87.603	-1.176	30.6432	0.3584	-0.33398	-0.11035	NaN	NaN	NaN	NaN	NaN	NaN
2.954	-123.2224	-64.458	1376.9925	-2.0152	1.2116	-0.12324	-95.185	-146.39	1322.2298	-0.75	0.9375	-0.045898	-91.189	24.7759	41.699	0.30518	-0.31592	-0.099609	NaN	NaN	NaN	NaN	NaN	NaN
2.956	-131.966	-64.285	1384.6728	-2.1104	1.3663	-0.11543	-68.152	-120.071	1357.401	-0.70703	0.88281	-0.09668	-74.59896	-11.5891	91.843	0.27783	-0.31152	-0.09375	NaN	NaN	NaN	NaN	NaN	NaN
2.958	-109.0451	-67.694	1398.1037	-2.1571	1.5038	-0.11768	-67.2429	-137.851	1392.194	-0.68701	0.85791	-0.11279	-52.106	40.1479	58.633	0.22754	-0.28467	-0.089355	NaN	NaN	NaN	NaN	NaN	NaN
2.96	-120.9328	-72.82	1396.01986	-2.166	1.6074	-0.125	-7.787	-185.736	1433.546	-0.69385	0.80127	-0.17529	-31.719	23.019	29.983	0.19043	-0.25732	-0.08374	NaN	NaN	NaN	NaN	NaN	NaN
2.962	-117.331	-66.052	1363.9096	-2.1346	1.6658	-0.13291	-33.653	-139.6953	1439.802	-0.71924	0.77734	-0.21509	-12.154	58.0693	-7.044	0.15625	-0.23291	-0.07373	NaN	NaN	NaN	NaN	NaN	NaN
2.964	-114.9986	-55.326	1361.092	-2.0824	1.6825	-0.14463	-31.774	-172.751	1447.7812	-0.7666	0.77148	-0.24609	2.511	0.933999999999997	30.0901	0.125	-0.2002	-0.074707	NaN	NaN	NaN	NaN	NaN	NaN
2.966	-83.712	-31.4514	1376.6467	-2.0202	1.6556	-0.14659	32.065	-175.559	1498.398	-0.86816	0.79883	-0.26611	12.117	32.5853	32.20941	0.11963	-0.19385	-0.064941	NaN	NaN	NaN	NaN	NaN	NaN
2.968	-104.7989	-10.674	1378.9491	-1.9738	1.598	-0.15186	25.951	-140.626	1505.423	-0.93164	0.82422	-0.26367	40.288	-11.035	50.1624	0.094238	-0.17139	-0.063477	NaN	NaN	NaN	NaN	NaN	NaN
2.97	-103.2915	0.847999999999999	1367.6194	-1.9351	1.5259	-0.15283	18.6214	-171.349	1521.97	-1.0723	0.875	-0.26465	31.098	30.721	38.4844	0.087891	-0.16577	-0.064453	NaN	NaN	NaN	NaN	NaN	NaN
2.972	-77.601	1.274	1370.2994	-1.9072	1.4475	-0.14082	7.183	-131.2683	1557.6177	-1.189	0.92529	-0.27246	43.4415	-39.957	76.759	0.084961	-0.16797	-0.066895	NaN	NaN	NaN	NaN	NaN	NaN
2.974	-65.311	6.042	1368.44783	-1.8792	1.3739	-0.12666	-9.116	-126.8335	1592.9494	-1.3047	0.97461	-0.28906	-2.979	-9.238	59.477	0.094727	-0.17334	-0.076172	NaN	NaN	NaN	NaN	NaN	NaN
2.976	-55.209	4.3179	1378.484	-1.8515	1.3087	-0.11377	9.203	-159.8198	1632.854	-1.4497	1.0649	-0.33154	9.062	-28.602	39.474	0.10254	-0.17822	-0.086914	NaN	NaN	NaN	NaN	NaN	NaN
2.978	-63.237	14.2239	1344.4437	-1.8111	1.2556	-0.10722	23.327	-118.927	1629.569	-1.5273	1.1113	-0.35352	19.045	42.692	-22.055	0.11328	-0.17822	-0.095215	NaN	NaN	NaN	NaN	NaN	NaN
2.98	-53.334	7.2516	1352.3914	-1.7656	1.2168	-0.10352	9.989	-149.2733	1590.755	-1.7065	1.2212	-0.37354	42.0862	6.6006	-7.844	0.10962	-0.1731	-0.10449	NaN	NaN	NaN	NaN	NaN	NaN
2.982	-31.481	26.613	1323.713	-1.7158	1.1859	-0.10508	29.504	-137.3158	1584.579	-1.8755	1.3125	-0.38501	-1.046	36.989	5.75	0.10352	-0.1582	-0.10693	NaN	NaN	NaN	NaN	NaN	NaN
2.984	-21.485	24.742	1314.9726	-1.6647	1.1589	-0.10889	3.824	-70.0666	1573.423	-2.0547	1.418	-0.38574	-26.212	-8.3727	19.9968	0.083008	-0.13672	-0.11426	NaN	NaN	NaN	NaN	NaN	NaN
2.986	-31.77	14.0746	1309.4536	-1.6238	1.1342	-0.11475	-21.024	-79.494	1558.171	-2.2871	1.5762	-0.36523	-21.99	36.9682	1.6027	0.064941	-0.11963	-0.10986	NaN	NaN	NaN	NaN	NaN	NaN
2.988	-29.743	-0.244	1293.484	-1.59	1.1123	-0.11885	-33.491	-41.6532	1574.22	-2.3906	1.6641	-0.33838	-14.662	15.3773	15.4644	0.027344	-0.092773	-0.10352	NaN	NaN	NaN	NaN	NaN	NaN
2.99	-34.491	4.297	1289.1846	-1.5659	1.0991	-0.12012	-66.625	-36.652	1561.81	-2.4194	1.8306	-0.16504	-71.331	69.818	22.442	-0.0019529	-0.061523	-0.09839	NaN	NaN	NaN	NaN	NaN	NaN
2.992	-45.156	25.6456	1259.95094	-1.548	1.091	-0.12041	-82.144	-84.476	1578.817	-2.6543	1.8975	-0.23194	-78.95724	41.578	60.973	-0.031738	-0.034668	-0.10156	NaN	NaN	NaN	NaN	NaN	NaN
2.994	-59.032	40.5734	1260.2429	-1.5324	1.0902	-0.125	-96.992	-20.012	1586.444	-2.9004	2.0273	-0.36035	-82.743	96.664	26.09	-0.066895	0.0029297	-0.09668	NaN	NaN	NaN	NaN	NaN	NaN
2.996	-41.535	48.024	1248.6547	-1.5105	1.0902	-0.12578	-110.3103	-11.808	1583.648	-2.9253	2.1685	-0.31689	-79.569	56.44	11.679	-0.086426	0.019531	-0.094727	NaN	NaN	NaN	NaN	NaN	NaN
2.998	-53.83	51.635	1226.265	-1.5021	1.09	-0.13223	-92.3351	1.51	1620.5671	-2.8984	2.1758	-0.26025	-119.259	73.331	8.184	-0.11914	0.054688	-0.09668	NaN	NaN	NaN	NaN	NaN	NaN
3	-75.81	59.648	1206.5783	-1.4858	1.0942	-0.13379	-151.845	47.48607	1609.7058	-2.8042	2.1255	-0.18848	-109.336	6.4599	57.4072	-0.14404	0.079834	-0.096923	NaN	NaN	NaN	NaN	NaN	NaN
3.002	-96.662	64.699	1207.1844	-1.4683	1.0898	-0.13555	-150.46	-9.1194	1604.9009	-2.696	2.0676	-0.18335	-106.54214	-10.80769	81.339	-0.1626	0.1001	-0.098145	NaN	NaN	NaN	NaN	NaN	NaN
3.004	-84.396	73.8697	1195.44888	-1.4503	1.0915	-0.13672	-128.0115	6.4792	1593.754	-2.5483	1.9946	-0.17725	-80.4856	-35.95948	109.403	-0.18115	0.1333	-0.10986	NaN	NaN	NaN	NaN	NaN	NaN
3.006	-96.4073	84.4825	1164.6624	-1.4315	1.0837	-0.14024	-132.264	14.41	1577.353	-2.3257	1.856	-0.18408	-70.9761	29.699	178.341	-0.19238	0.14111	-0.12305	NaN	NaN	NaN	NaN	NaN	NaN
3.008	-95.7897	79.4184	1137.0359	-1.4116	1.0689	-0.1417	-94.8883	-19.561	1614.428	-2.2222	1.7798	-0.18213	-50.85132	38.312	327.2178	-0.20801	0.15625	-0.14502	NaN	NaN	NaN	NaN	NaN	NaN
3.01	-89.3764	87.5681	1116.598	-1.3867	1.0508	-0.14258	-93.3915	29.48	1619.155	-2.0488	1.6133	-0.16455	-60.6631	52.6358	487.764	-0.22192	0.16846	-0.15356	NaN	NaN	NaN	NaN	NaN	NaN
3.012	-73.7575	83.3522	1108.1864	-1.3665	1.0204	-0.14267	-104.5677	22.328	1585.2524	-1.9175	1.4692	-0.14307	-45.2686	54.4293	647.2	-0.23682	0.17871	-0.16113	NaN	NaN	NaN	NaN	NaN	NaN
3.014	-85.441	98.0738	1077.3884	-1.3465	0.98984	-0.14277	-76.599	18.9504	1576.9423	-1.8652	1.415	-0.1416	10.42762	57.1576	801.488	-0.29785	0.18896	-0.16699	NaN	NaN	NaN	NaN	NaN	NaN
3.016	-91.9971	94.8725	1060.5702	-1.3242	0.9582	-0.14238	-107.9071	75.258	1547.059	-1.8047	1.3281	-0.1543	77.427	32.397	1019.531	-0.34277	0.19775	-0.16748	NaN	NaN	NaN	NaN	NaN	NaN
3.018	-71.1028	93.85625	1068.4716	-1.3029	0.9248	-0.13281	-75.11	54.279	1549.207	-1.7651	1.2876	-0.15552	72.221	4.476	1272.303	-0.45898	0.2251	-0.18555	NaN	NaN	NaN	NaN	NaN	NaN
3.02	-52.325	103.0959	1071.4931	-1.2788	0.89307	-0.13428	-46.67	128.069	1566.816	-1.73	1.2485	-0.16455	50.295	-27.364	1422.366	-0.58838	0.26026	-0.19019	NaN	NaN	NaN	NaN	NaN	NaN
3.022	-48.909	114.1423	1055.8847	-1.2588	0.86465	-0.13037	-60.301	158.527	1520.8833	-1.6992	1.207	-0.17432	22.527	-44.424	1511.374	-0.74609	0.31348	-0.19531	NaN	NaN	NaN	NaN	NaN	NaN
3.024	-47.383	111.4024	1018.17916	-1.2348	0.83554	-0.12988	-40.885	106.541	1511.4023	-1.6836	1.1904	-0.18164	-8.245	-66.525	1584.62	-1.0376	0.4292	-0.19287	NaN	NaN	NaN	NaN	NaN	NaN
3.026	-42.49	100.7249	1000.0164	-1.2093	0.81094	-0.12675	-22.317	139.589	1492.521	-1.6504	1.1621	-0.18652	-42.378	-129.081	1646.197	-1.2168	0.50586	-0.19141	NaN	NaN	NaN	NaN	NaN	NaN
3.028	-7.639	111.99783	984.4327	-1.1854	0.78721	-0.12109	-30.138	114.2219	1447.531	-1.6233	1.1477	-0.19018	-59.527	-144.231	1636.449	-1.6543	0.69727	-0.19141	NaN	NaN	NaN	NaN	NaN	NaN
3.03	-14.999	116.2158	968.032	-1.1621	0.76367	-0.11768	23.593	106.633	1440.864	-1.5991	1.1235	-0.19189	-72.54	-224.264	1585.574	-2.0269	0.8833	-0.16992	NaN	NaN	NaN	NaN	NaN	NaN
3.032	-5.563	118.5791	932.871	-1.1419	0.74287	-0.11455	10.708	167.9053	1398.8202	-1.5601	1.0962	-0.19629	-105.072	-254.48	1504.924	-2.4219	1.0977	-0.13623	NaN	NaN	NaN	NaN	NaN	NaN
3.034	5.383	103.29714	911.40926	-1.1192	0.72471	-0.11464	12.649	111.489	1382.9601	-1.5386	1.0776	-0.19531	-133.692	-343.59	1486.322	-2.9419	1.4399	-0.085938	NaN	NaN	NaN	NaN	NaN	NaN
3.036	27.118	120.65345	884.8088	-1.1001	0.70166	-0.10762	18.019	142.4545	1380.9319	-1.4917	1.0356	-0.18896	-157.056	-327.52	1397.755	-3.1968	1.6196	-0.054199	NaN	NaN	NaN	NaN	NaN	NaN
3.038	20.918	121.5424	871.8579	-1.0857	0.68584	-0.10899	3.791	138.0349	1351.50035	-1.4627	1.0061	-0.18383	-145.904	-329.473	1333.948	-3.6836	1.9746	-0.028809	NaN	NaN	NaN	NaN	NaN	NaN
3.04	20.356	129.0957	863.2418	-1.0684	0.66211	-0.10498	3.137	103.925	1350.234	-1.4355	0.97461	-0.18262	-131.494	-215.7113	1253.6	-3.9092	2.2188	-0.061523	NaN	NaN	NaN	NaN	NaN	NaN
3.042	37.2001	132.1157	840.5065	-1.0438	0.64424	-0.10283	-10.053	179.1813	1319.9934	-1.4077	0.93408	-0.18213	-127.5142	-186.498	1281.439	-3.9375	2.3672	-0.10645	NaN	NaN	NaN	NaN	NaN	NaN
3.044	7.308	138.219	824.896	-1.0285	0.62188	-0.10586	-60.2966	162.99085	1289.7643	-1.3862	0.92041	-0.17334	-182.168	-95.51	1264.188	-3.5601	2.27	-0.22656	NaN	NaN	NaN	NaN	NaN	NaN
3.046	-0.877000000000002	124.5507	790.7156	-1.0062	0.60313	-0.1043	-58.9954	165.8112	1249.7541	-1.3589	0.89111	-0.17383	-217.617	-130.73	1281.859	-3.2246	2.1094	-0.31445	NaN	NaN	NaN	NaN	NaN	NaN
3.048	-15.021	124.1443	774.1057	-0.98389	0.58838	-0.10185	-46.679	218.285	1205.751	-1.3376	0.87524	-0.16381	-224.062	-127.092	1265.407	-2.4043	1.6719	-0.47168	NaN	NaN	NaN	NaN	NaN	NaN
3.05	-7.332	128.1344	750.4893	-0.96631	0.57471	-0.097656	-46.0764	159.8608	1192.5512	-1.3228	0.85986	-0.16309	-200.622	-183.398	1270.364	-1.8438	1.3027	-0.54004	NaN	NaN	NaN	NaN	NaN	NaN
3.052	-25.976	141.6949	713.44016	-0.9458	0.56025	-0.094043	-38.005	190.272	1182.1111	-1.2886	0.83936	-0.15869	-207.772	-163.502	1292.619	-1.4033	0.97461	-0.58496	NaN	NaN	NaN	NaN	NaN	NaN
3.054	-36.163	138.9702	691.8632	-0.93408	0.54307	-0.090723	-58.073	194.2144	1153.395	-1.2793	0.83008	-0.15527	-193.517	-224.342	1325.678	-1.0776	0.64502	-0.61475	NaN	NaN	NaN	NaN	NaN	NaN
3.056	-45.6949	140.988	671.4962	-0.91494	0.52861	-0.087598	-52.0789	172.263	1119.369	-1.2412	0.81201	-0.14453	-195.679	-246.235	1343.326	-0.99512	0.52832	-0.61328	NaN	NaN	NaN	NaN	NaN	NaN
3.058	-41.464	143.7161	647.6798	-0.89707	0.51719	-0.081543	-37.089	235.8544	1069.088	-1.2088	0.79029	-0.14282	-125.967	-334.587	1366.306	-0.92969	0.38818	-0.63672	NaN	NaN	NaN	NaN	NaN	NaN
3.06	-41.9975	154.0694	637.0997	-0.87891	0.50195	-0.07959	-55.6237	195.563	1023.256	-1.1758	0.77246	-0.13818	-121.549	-377.347	1432.254	-0.86352	0.29614	-0.67554	NaN	NaN	NaN	NaN	NaN	NaN
3.062	-66.5512	129.056	606.42079	-0.85595	0.48447	-0.077832	-31.006	196.665	1009.2021	-1.127	0.7373	-0.13135	-71.876	-431.11	1495.706	-0.75342	0.21729	-0.69189	NaN	NaN	NaN	NaN	NaN	NaN
3.064	-61.3533	127.9673	591.73769	-0.82842	0.46494	-0.074414	-47.3024	238.9856	949.107	-1.105	0.72119	-0.12842	-20.404	-420.968	1559.872	-0.55078	0.12109	-0.68359	NaN	NaN	NaN	NaN	NaN	NaN
3.066	-70.4523	133.706888	571.1405	-0.8003	0.44814	-0.066602	-50.872	183.66946	938.3603	-1.0508	0.68164	-0.12988	12.677	-400.24	1585.48073	-0.44629	0.085449	-0.66699	NaN	NaN	NaN	NaN	NaN	NaN
3.068	-72.101	144.2973	531.8324	-0.77197	0.42939	-0.066211	-29.0913	235.997	927.9781	-1.0095	0.65454	-0.12232	9.861	-326.291	1614.1836	-0.26221	0.013672	-0.61133	NaN	NaN	NaN	NaN	NaN	NaN
3.07	-67.4656	137.2023	507.526	-0.73877	0.40869	-0.068359	-12.56473	241.91	896.1186	-0.96875	0.61914	-0.12207	63.654	-292.108	1630.89	-0.17871	-0.020508	-0.55493	NaN	NaN	NaN	NaN	NaN	NaN
3.072	-66.4503	122.4229	496.92	-0.7123	0.38496	-0.061523	8.3122	207.74218	890.463	-0.90381	0.58057	-0.12012	96.341	-253.4106	1653.031	-0.146	-0.029297	-0.49658	NaN	NaN	NaN	NaN	NaN	NaN
3.074	-54.173	127.8014	477.39474	-0.6875	0.36485	-0.058984	28.8472	259.247	830.0887	-0.88086	0.55762	-0.11865	106.522	-205.866	1648.117	-0.2251	0.020996	-0.40576	NaN	NaN	NaN	NaN	NaN	NaN
3.076	-62.2979	130.2754	455.0045	-0.65782	0.34453	-0.053515	12.595	209.42974	768.718	-0.81396	0.51221	-0.12256	77.952	-162.21	1668.014	-0.38501	0.10938	-0.34253	NaN	NaN	NaN	NaN	NaN	NaN
3.078	-43.251	124.795	425.22141	-0.62627	0.32802	-0.049707	50.747	215.2652	742.51795	-0.77002	0.47851	-0.12402	100.141	-131.533	1678.848	-0.62061	0.21338	-0.29639	NaN	NaN	NaN	NaN	NaN	NaN
3.08	-26.086	129.2921	402.35223	-0.59717	0.30566	-0.04834	79.92	251.639	690.81292	-0.72607	0.4458	-0.12256	127.093	-120.971	1697.5094	-1.0068	0.39307	-0.26074	NaN	NaN	NaN	NaN	NaN	NaN
3.082	4.13	124.5137	379.6609	-0.5707	0.28681	-0.044141	51.1461	188.0696	663.371	-0.66357	0.39844	-0.12646	140.714	-104.407	1696.2444	-1.209	0.49219	-0.25488	NaN	NaN	NaN	NaN	NaN	NaN
3.084	-3.195	113.7078	360.881	-0.53926	0.26689	-0.041894	59.93865	211.8448	617.7511	-0.63867	0.37695	-0.12695	117.98	-140.457	1682.815	-1.5898	0.69629	-0.28027	NaN	NaN	NaN	NaN	NaN	NaN
3.086	10.832	100.5848	331.2281	-0.50723	0.25556	-0.042676	48.969	195.522	560.3866	-0.5708	0.33643	-0.12744	94.648	-141.8239	1686.123	-1.8292	0.89746	-0.32593	NaN	NaN	NaN	NaN	NaN	NaN
3.088	24.154	101.454	309.9968	-0.47217	0.2375	-0.040625	27.8831	172.1578	548.3794	-0.53052	0.30396	-0.12891	69.299	-176.796	1754.40438	-2.0586	1.125	-0.39404	NaN	NaN	NaN	NaN	NaN	NaN
3.09	1.943	111.2697	306.8755	-0.43604	0.22705	-0.04541	52.24	243.181	503.34984	-0.48779	0.27197	-0.13037	25.9402	-154.628	1799.875	-2.3433	1.4028	-0.47803	NaN	NaN	NaN	NaN	NaN	NaN
3.092	10.729	107.771	296.7749	-0.3999	0.20762	-0.041114	23.42154	206.545	474.171	-0.42725	0.23486	-0.13184	33.601	-188.466	1846.014	-2.4844	1.5332	-0.51172	NaN	NaN	NaN	NaN	NaN	NaN
3.094	18.403	108.812	279.7171	-0.36182	0.19257	-0.039941	32.624	217.779	445.3123	-0.39063	0.21973	-0.13379	4.533	-161.709	1857.038	-2.7773	1.7734	-0.56836	NaN	NaN	NaN	NaN	NaN	NaN
3.096	28.244	115.296	256.0947	-0.32236	0.17813	-0.03877	19.843	226.907	372.405	-0.32617	0.1709	-0.13525	-26.7732	-223.968	1874.816	-3.0015	1.9478	-0.59913	NaN	NaN	NaN	NaN	NaN	NaN
3.098	0.652000000000001	109.376	227.0051	-0.28398	0.16485	-0.040332	5.78	164.7133	346.0178	-0.28076	0.14355	-0.13697	-52.248	-172.169	1884.679	-3.2026	2.1079	-0.61865	NaN	NaN	NaN	NaN	NaN	NaN
3.1	-2.256	96.69	216.2688	-0.24707	0.15039	-0.040527	4.129	196.2105	323.3815	-0.23682	0.11523	-0.13428	-63.985	-181.635	1842.827	-3.3394	2.2446	-0.64209	NaN	NaN	NaN	NaN	NaN	NaN
3.102	-17.18	83.8275	205.2086	-0.20732	0.13681	-0.037695	-22.498	171.3035	296.4044	-0.18799	0.07373	-0.14014	-70.224	-81.753	1807.7366	-3.3457	2.2578	-0.64453	NaN	NaN	NaN	NaN	NaN	NaN
3.104	-1.455	87.0531	187.7652	-0.17393	0.12129	-0.036328	-39.7066	133.401	281.938	-0.1665	0.059082	-0.13818	-48.165	-102.124	1781.612	-3.2637	2.2266	-0.65869	NaN	NaN	NaN	NaN	NaN	NaN
3.106	-16.417	79.6167	168.9311	-0.13565	0.1084	-0.036719	-31.7975	165.1032	256.259	-0.12354	0.027344	-0.13965	-67.167	-22.2779	1769.63	-3.1369	2.1731	-0.6853	NaN	NaN	NaN	NaN	NaN	NaN
3.108	-27.924	62.4936	161.0116	-0.10137	0.09082	-0.032617	-69.991	122.090411	221.7197	-0.097658	0.0031738	-0.13819	-90.506	-36.912	1747.065	-2.9663	2.0962	-0.71045	NaN	NaN	NaN	NaN	NaN	NaN
3.11	-21.429	75.5114	157.8734	-0.070801	0.079102	-0.026367	-71.9413	143.4097	205.54895	-0.077637	-0.018066	-0.13477	-79.303	62.5749	1716.965	-2.6602	1.8926	-0.71484	NaN	NaN	NaN	NaN	NaN	NaN
3.112	-29.224	86.9149	148.042	-0.038086	0.065918	-0.029687	-59.6899	165.497	168.825	-0.063965	-0.042969	-0.13574	-46.3235	52.4893	1693.087	-2.4883	1.7539	-0.70605	NaN	NaN	NaN	NaN	NaN	NaN
3.114	-49.21166	89.515	144.1428	-0.0083005	0.051367	-0.029981	-76.2457	91.8936	159.6236	-0.060547	-0.052734	-0.13379	-35.1705	125.097	1691.494	-2.2729	1.6099	-0.73389	NaN	NaN	NaN	NaN	NaN	NaN
3.116	-67.3746	66.9253	133.6786	0.024121	0.04082	-0.029981	-71.5764	97.0741	167.1378	-0.062988	-0.067383	-0.13086	-31.072	92.065	1681.126	-2.3681	1.7833	-0.74511	NaN	NaN	NaN	NaN	NaN	NaN
3.118	-55.0076	58.8644	142.71975	0.049707	0.027344	-0.032617	-72.964	65.4145	137.6065	-0.061035	-0.069336	-0.12378	-13.34	166.639	1676.607	-2.6055	2.082	-0.73535	NaN	NaN	NaN	NaN	NaN	NaN
3.12	-60.5145	58.729	121.7264	0.074707	0.014648	-0.038574	-58.4019	42.887	147.336	-0.067383	-0.080078	-0.12305	17.153	104.185	1696.139	-2.7813	2.2383	-0.61133	NaN	NaN	NaN	NaN	NaN	NaN
3.122	-76.324	49.5624	118.6287	0.10069	0.0032226	-0.041992	-3.06	92.5009	122.827	-0.071289	-0.078613	-0.12012	23.311	157.77	1706.66	-2.7397	2.1528	-0.54053	NaN	NaN	NaN	NaN	NaN	NaN
3.124	-49.755	56.1953	109.3253	0.12002	-0.0069336	-0.042578	-23.507	68.688	95.296	-0.07373	-0.078613	-0.11523	31.2853	97.4376	1719.592	-2.4609	1.8535	-0.47949	NaN	NaN	NaN	NaN	NaN	NaN
3.126	-70.7617	62.11496	108.3384	0.14033	-0.018262	-0.04375	-31.188	80.7707	78.5799	-0.069336	-0.077148	-0.11475	50.9119	162.509	1715.361	-2.2308	1.6829	-0.55347	NaN	NaN	NaN	NaN	NaN	NaN
3.128	-46.288	72.0323	85.04405	0.15137	-0.028808	-0.042187	-11.79	82.4926	38.462	-0.06958	-0.070557	-0.11255	84.072	89.44	1714.639	-2.0117	1.5625	-0.64453	NaN	NaN	NaN	NaN	NaN	NaN
3.13	-47.561	56.143	70.0876	0.15674	-0.038574	-0.040039	-21.239	17.074	42.449	-0.066895	-0.06543	-0.10938	90.086	120.4139	1693.86	-1.7573	1.4536	-0.69873	NaN	NaN	NaN	NaN	NaN	NaN
3.132	-33.756	50.7205	69.4706	0.15273	-0.052832	-0.037598	21.689	47.8037	59.1232	-0.060547	-0.058594	-0.11328	105.411	38.721	1685.542	-1.6636	1.395	-0.69287	NaN	NaN	NaN	NaN	NaN	NaN
3.134	-11.239	48.8437	76.79153	0.14668	-0.057519	-0.032715	16.208	22.164	49.0237	-0.061523	-0.054688	-0.11279	96.48	101.183	1640.331	-1.5835	1.2827	-0.62061	NaN	NaN	NaN	NaN	NaN	NaN
3.136	-7.296	57.728	71.835	0.12988	-0.07041	-0.027637	-1.881	0.1858	47.0772	-0.055664	-0.050293	-0.10986	87.467	79.191	1612.818	-1.6072	1.2356	-0.55737	NaN	NaN	NaN	NaN	NaN	NaN
3.138	-12.631	45.4752	76.4685	0.10937	-0.067871	-0.018554	26.1	36.77	24.0458	-0.051514	-0.051514	-0.11231	33.041	175.4149	1545.4969	-1.6621	1.2207	-0.51465	NaN	NaN	NaN	NaN	NaN	NaN
3.14	-14.441	41.407	65.6755	0.083984	-0.069824	-0.0087891	-15.851	5.813	-0.506	-0.048828	-0.053711	-0.11426	12.685	168.8769	1519.238	-1.75	1.2168	-0.48584	NaN	NaN	NaN	NaN	NaN	NaN
3.142	15.919	52.106	43.0425	0.058984	-0.064551	-0.0020508	18.757	20.97126	29.6924	-0.04834	-0.050293	-0.11084	8.795	252.372	1506.2073	-1.7734	1.2188	-0.48242	NaN	NaN	NaN	NaN	NaN	NaN
3.144	-12.923	49.816	53.1062	0.037891	-0.057812	0.0067383	31.383	36.935	32.27963	-0.05127	-0.053711	-0.10645	14.92	221.811	1481.935	-1.7554	1.2173	-0.47412	NaN	NaN	NaN	NaN	NaN	NaN
3.146	2.721	43.295	52.6824	0.011719	-0.045312	0.012207	1.676	-0.486899999999999	26.4051	-0.063477	-0.053223	-0.10205	-25.547	271.971	1419.107	-1.6938	1.2075	-0.46679	NaN	NaN	NaN	NaN	NaN	NaN
3.148	4.492	41.0951	48.1826	-0.0077148	-0.039746	0.016699	39.435	26.5978	29.204	-0.076416	-0.056152	-0.098144	-111.597	220.9265	1379.797	-1.605	1.1899	-0.45605	NaN	NaN	NaN	NaN	NaN	NaN
3.15	-1.744	40.9619	34.0978	-0.02002	-0.033691	0.019043	-1.757	5.27038	6.92	-0.090332	-0.055664	-0.091309	-164.738	245.6079	1343.767	-1.4722	1.1431	-0.43018	NaN	NaN	NaN	NaN	NaN	NaN
3.152	-11.254	27.13564	39.2252	-0.030274	-0.022754	0.02041	-44.557	-9.7158	24.2929	-0.11328	-0.049805	-0.07666	-126.0098	198.4435	1308.0776	-1.4082	1.1104	-0.41211	NaN	NaN	NaN	NaN	NaN	NaN
3.154	15.19	16.9089	40.0096	-0.036035	-0.020215	0.02002	-20.621	40.9407	16.2295	-0.12305	-0.051758	-0.070313	-109.3261	219.678	1226.572	-1.3003	1.0366	-0.37744	NaN	NaN	NaN	NaN	NaN	NaN
3.156	8.738	13.5097	40.5142	-0.035254	-0.021777	0.023535	-34.981	18.1047	0.8638	-0.14111	-0.046875	-0.061035	-123.838	179.477	1172.838	-1.2393	0.96875	-0.3479	NaN	NaN	NaN	NaN	NaN	NaN
3.158	-24.148	23.2072	24.8246	-0.033008	-0.026465	0.020703	-48.764	17.598	28.9099	-0.15527	-0.037109	-0.050781	-150.353	202.69	1126.087	-1.1875	0.9082	-0.32031	NaN	NaN	NaN	NaN	NaN	NaN
3.16	-34.127	28.7788	30.081	-0.03418	-0.033203	0.019043	-60.91613	43.543	15.6785	-0.16406	-0.03418	-0.041992	-176.83	175.621	1105.167	-1.1304	0.83447	-0.28467	NaN	NaN	NaN	NaN	NaN	NaN
3.162	-41.942	27.7925	39.1974	-0.031836	-0.041406	0.013379	-98.068	4.58626	24.6379	-0.16211	-0.018555	-0.03418	-216.312	232.376	1041.56	-1.0977	0.80469	-0.26514	NaN	NaN	NaN	NaN	NaN	NaN
3.164	-45.7896	33.1578	44.191	-0.024707	-0.05332	0.010547	-61.8661	49.0874	26.4061	-0.15967	-0.0092774	-0.018555	-202.537	217.6776	1015.0519	-1.0347	0.75049	-0.25293	NaN	NaN	NaN	NaN	NaN	NaN
3.166	-59.6233	28.4528	33.4273	-0.022754	-0.067383	0.0011719	-66.4627	47.1938	8.587	-0.15283	-0.00097656	-0.0068359	-153.2775	223.066	978.0956	-0.98023	0.71509	-0.23584	NaN	NaN	NaN	NaN	NaN	NaN
3.168	-70.2643	23.6365	24.77773	-0.022852	-0.078125	0.00068364	-106.834	19.1374	18.6604	-0.13965	0.00097656	-0.0058594	-140.1121	177.31	944.5563	-0.9292	0.68701	-0.21289	NaN	NaN	NaN	NaN	NaN	NaN
3.17	-60.23	14.5993	31.2931	-0.02002	-0.082031	-0.0019531	-62.3055	45.5	19.4314	-0.13037	0.0019531	0.0014648	-152.9277	221.528	880.8943	-0.86475	0.65283	-0.18555	NaN	NaN	NaN	NaN	NaN	NaN
3.172	-82.09483	27.9835	34.2689	-0.024512	-0.083398	-0.0039062	-79.859	18.4405	15.0157	-0.1084	-0.00097656	0.0058594	-143.1219	240.9168	829.7535	-0.83496	0.63672	-0.16846	NaN	NaN	NaN	NaN	NaN	NaN
3.174	-63.7279	29.00443	34.5546	-0.024707	-0.080078	-0.0096679	-38.259	29.5193	39.192	-0.088379	-0.0065918	0.013184	-98.688	285.44387	783.148	-0.76123	0.59131	-0.14453	NaN	NaN	NaN	NaN	NaN	NaN
3.176	-77.31431	22.318856	32.4451	-0.022363	-0.071875	-0.01709	-28.499	44.43	27.2285	-0.066406	-0.01416	0.019531	-67.727	281.189	713.46	-0.70044	0.5437	-0.125	NaN	NaN	NaN	NaN	NaN	NaN
3.178	-55.0518	14.8556	24.231	-0.020996	-0.064551	-0.023437	-67.9579	5.2818	32.117	-0.036621	-0.026367	0.020996	-44.266	281.034	655.947	-0.62891	0.49121	-0.1084	NaN	NaN	NaN	NaN	NaN	NaN
3.18	-58.9146	29.1228	27.8479	-0.012207	-0.054688	-0.028809	-17.41	47.22	42.3671	-0.021484	-0.039063	0.021484	1.983	261.676	599.808	-0.53369	0.4126	-0.09375	NaN	NaN	NaN	NaN	NaN	NaN
3.182	-54.4761	36.6857	28.9947	-0.005957	-0.050293	-0.039453	-30.817	44.813	6.571	0.010742	-0.059082	0.020508	9.61800000000001	254.033	567.198	-0.48633	0.37061	-0.084961	NaN	NaN	NaN	NaN	NaN	NaN
3.184	-45.544	28.5984	33.6865	0.0065429	-0.04043	-0.051758	-25.021	16.6593	44.0315	0.033447	-0.071289	0.017334	-21.261	230.43	557.67	-0.39307	0.29443	-0.070801	NaN	NaN	NaN	NaN	NaN	NaN
3.186	-44.965	30.7608	29.2356	0.01709	-0.029492	-0.058789	11.194	37.687	46.019	0.055664	-0.084961	0.016113	-17.975	226.6731	517.769	-0.33105	0.23462	-0.068848	NaN	NaN	NaN	NaN	NaN	NaN
3.188	-30.075	32.3886	33.6608	0.03125	-0.017773	-0.065137	-13.252	14.3901	40.432	0.082031	-0.097168	0.0043945	-11.111	217.565	463.004	-0.26758	0.18164	-0.060547	NaN	NaN	NaN	NaN	NaN	NaN
3.19	-45.986	24.5195	43.5166	0.039551	-0.0048828	-0.073242	18.354	24.099	31.357	0.091797	-0.10596	0.0029297	32.895	226.0988	429.8001	-0.18896	0.12012	-0.045898	NaN	NaN	NaN	NaN	NaN	NaN
3.192	-14.515	18.6056	40.7044	0.049219	0.005664	-0.082813	25.8264	38.424	11.385	0.11328	-0.11426	-0.00048828	37.255	229.253	402.1753	-0.15332	0.090332	-0.035645	NaN	NaN	NaN	NaN	NaN	NaN
3.194	5.685	18.5174	47.4469	0.058203	0.020704	-0.094043	-12.544	11.928	29.9361	0.1228	-0.12133	-0.0073242	26.95	233.753	397.554	-0.086426	0.044434	-0.023926	NaN	NaN	NaN	NaN	NaN	NaN
3.196	0.722000000000001	15.6307	46.9916	0.060156	0.029688	-0.099904	43.353	31.3249	49.993	0.12939	-0.12354	-0.01416	-8.877	210.062	365.198	-0.042724	0.0085451	-0.012939	NaN	NaN	NaN	NaN	NaN	NaN
3.198	-19.554	1.5778	85.0412	0.067285	0.041407	-0.10947	24.007	31.56605	18.618127	0.14502	-0.12939	-0.02002	-7.381	185.349	341.677	-0.0024414	-0.024902	-0.0078125	NaN	NaN	NaN	NaN	NaN	NaN
3.2	6.04	14.565	108.091	0.067383	0.053711	-0.11914	-15.063	8.713	34.0008	0.14844	-0.13379	-0.024902	-38.1906	158.359	288.436	0.042969	-0.058105	-0.00097656	NaN	NaN	NaN	NaN	NaN	NaN
3.202	15.098	33.2593	142.215	0.07002	0.063379	-0.1212	25.523	43.967	39.0749	0.15723	-0.13867	-0.036133	-48.2088	124.675	255.158	0.0625	-0.074219	0.0014648	NaN	NaN	NaN	NaN	NaN	NaN
3.204	2.002	43.363	189.1883	0.068164	0.07666	-0.12637	-19.585	20.0384	27.2253	0.16113	-0.14258	-0.036865	-68.872	99.98	205.2988	0.092773	-0.1001	0.0043945	NaN	NaN	NaN	NaN	NaN	NaN
3.206	23.5469	23.4303	250.6822	0.069336	0.08877	-0.13379	-34.236	16.0869	52.952	0.16211	-0.14697	-0.040527	-79.192	108.979	199.926	0.10718	-0.11768	0.0043946	NaN	NaN	NaN	NaN	NaN	NaN
3.208	56.389	21.3572	314.632	0.069824	0.10039	-0.14258	-9.473	32.603	22.8557	0.16162	-0.15625	-0.05127	-107.8829	122.66	135.8968	0.11328	-0.13721	0.0083008	NaN	NaN	NaN	NaN	NaN	NaN
3.21	70.282	48.4742	398.971	0.069824	0.11377	-0.15381	-63.6136	-13.3415	31.0853	0.15869	-0.15381	-0.055176	-111.906	127.821	112.4513	0.10596	-0.15186	0.0083008	NaN	NaN	NaN	NaN	NaN	NaN
3.212	36.915	59.7194	476.07335	0.066211	0.12168	-0.16152	-46.9562	5.208	43.2595	0.15332	-0.15967	-0.056641	-125.705	114.8053	75.846	0.099609	-0.15869	0.013184	NaN	NaN	NaN	NaN	NaN	NaN
3.214	8.0161	46.3765	569.5704	0.055078	0.13262	-0.16885	-70.0303	-0.1929	30.68	0.14283	-0.15723	-0.063721	-121.773	89.1817	104.5267	0.074707	-0.16162	0.015625	NaN	NaN	NaN	NaN	NaN	NaN
3.216	9.843	34.1088	656.9374	0.039453	0.13926	-0.17392	-81.7182	-2.035	28.4877	0.13428	-0.15625	-0.065918	-88.347	82.0385	75.957	0.041992	-0.16431	0.029053	NaN	NaN	NaN	NaN	NaN	NaN
3.218	-4.566	33.16	713.141	0.0006834	0.1541	-0.17256	-31.245	38.5006	23.1777	0.1123	-0.15039	-0.071289	-94.916	49.3247	78.011	0.010254	-0.15723	0.039063	NaN	NaN	NaN	NaN	NaN	NaN
3.22	-37.249	34.081	799.864	-0.052734	0.16309	-0.16992	-75.7049	21.19603	16.766	0.10156	-0.13867	-0.07373	-143.085	34.022	32.085	-0.054199	-0.14648	0.054199	NaN	NaN	NaN	NaN	NaN	NaN
3.222	-84.024	8.77	887.1912	-0.13408	0.17354	-0.16973	-82.606	15.63	38.0534	0.077637	-0.13037	-0.076172	-130.072	2.182	47.7352	-0.078613	-0.13281	0.055664	NaN	NaN	NaN	NaN	NaN	NaN
3.224	-107.643	-17.802	974.137	-0.22715	0.1915	-0.16748	-57.886	21.263	20.256	0.059814	-0.11548	-0.081055	-109.9647	9.103	18.7224	-0.14404	-0.1123	0.06543	NaN	NaN	NaN	NaN	NaN	NaN
3.226	-151.377	-30.0005	1031.919	-0.34043	0.20791	-0.16397	-79.772	2.0622	16.61035	0.040527	-0.10596	-0.078613	-71.7694	25.098	25.278	-0.20459	-0.081055	0.066895	NaN	NaN	NaN	NaN	NaN	NaN
3.228	-166.11	-33.2891	1055.885	-0.48056	0.23027	-0.15615	-36.825	18.85135	44.1189	0.015625	-0.089844	-0.082031	-20.842	43.1008	-0.394000000000002	-0.23389	-0.06543	0.072266	NaN	NaN	NaN	NaN	NaN	NaN
3.23	-172.8591	-48.759	1079.0194	-0.65088	0.26709	-0.1416	-57.4152	20.7222	13.944	-0.0014648	-0.082031	-0.083496	0.0150000000000006	24.4848	12.066	-0.29297	-0.032227	0.077148	NaN	NaN	NaN	NaN	NaN	NaN
3.232	-175.5777	-57.748	1094.651	-0.85567	0.31514	-0.12617	-59.4172	1.2021	23.0354	-0.013184	-0.062988	-0.091309	-8.901	15.37344	0.0310000000000024	-0.32715	-0.008789	0.081543	NaN	NaN	NaN	NaN	NaN	NaN
3.234	-152.233	-55.777	1118.508	-1.0859	0.3793	-0.11347	1.852	19.132	48.906	-0.028076	-0.053467	-0.088867	2.079	-1.4172	33.32959	-0.3623	0.019531	0.080078	NaN	NaN	NaN	NaN	NaN	NaN
3.236	-163.6481	-42.944	1152.176	-1.3331	0.45625	-0.093945	-49.4891	-16.852	35.936	-0.037598	-0.047852	-0.09082	28.577	7.18521	25.8463	-0.41016	0.056641	0.07666	NaN	NaN	NaN	NaN	NaN	NaN
3.238	-156.0726	-34.337	1169.381	-1.5964	0.55869	-0.074707	-14.047	-36.3206	102.2014	-0.047852	-0.037598	-0.099121	43.5874	-3.035	60.96	-0.43115	0.07666	0.073242	NaN	NaN	NaN	NaN	NaN	NaN
3.24	-174.233	-34.947	1153.673	-1.8594	0.67969	-0.057129	24.025	-12.707	120.18806	-0.052734	-0.032227	-0.10547	51.503	26.524	53.05	-0.47119	0.11768	0.081055	NaN	NaN	NaN	NaN	NaN	NaN
3.242	-176.7455	-33.4098	1139.0281	-2.1041	0.82481	-0.044531	2.871	-30.076	173.9557	-0.055664	-0.022461	-0.1123	34.488	40.812	39.6563	-0.49682	0.15161	0.086425	NaN	NaN	NaN	NaN	NaN	NaN
3.244	-188.363	-40.49604	1125.0846	-2.3178	0.979	-0.029883	41.7014	-10.649	281.59	-0.066162	-0.0087888	-0.12646	44.994	79.744	-14.5928	-0.52295	0.18945	0.089844	NaN	NaN	NaN	NaN	NaN	NaN
3.246	-175.439	-28.0377	1118.1489	-2.4898	1.154	-0.041993	25.6266	-7.482	350.994	-0.081543	0.0058594	-0.12646	20.752	82.344	-3.3951	-0.55225	0.2373	0.10059	NaN	NaN	NaN	NaN	NaN	NaN
3.248	-165.049	-22.393	1112.0194	-2.5834	1.3276	-0.066504	41.789	-6.949	510.837	-0.12842	0.024414	-0.13525	8.165	79.996	16.4675	-0.56348	0.25488	0.10596	NaN	NaN	NaN	NaN	NaN	NaN
3.25	-181.907	-35.655	1094.6166	-2.5801	1.4863	-0.087891	109.256	34.554	639.89	-0.15381	0.034668	-0.14014	2.20800000000001	56.844	33.96007	-0.57227	0.29785	0.12207	NaN	NaN	NaN	NaN	NaN	NaN
3.252	-160.381	-64.812	1101.9555	-2.4576	1.5971	-0.090234	72.618	22.64	779.841	-0.22266	0.060547	-0.15625	46.39	43.699	38.3723	-0.57006	0.3208	0.13135	NaN	NaN	NaN	NaN	NaN	NaN
3.254	-137	-87.032	1103.6893	-2.2632	1.6333	-0.10303	71.082	20.8538	935.8695	-0.28882	0.085449	-0.17432	-0.597000000000001	27.6399	42.687	-0.5542	0.33447	0.14014	NaN	NaN	NaN	NaN	NaN	NaN
3.256	-107.5598	-83.5508	1109.91581	-2.03	1.5822	-0.14795	88.031	16.572	1043.5449	-0.37598	0.12305	-0.19043	-31.985	34.0223	35.272	-0.51318	0.33545	0.15137	NaN	NaN	NaN	NaN	NaN	NaN
3.258	-76.025	-92.9453	1113.1679	-1.7891	1.4597	-0.21094	-1.267	-0.812999999999995	1138.834	-0.52246	0.18164	-0.2085	-66.5845	30.894	52.046	-0.4873	0.33008	0.15625	NaN	NaN	NaN	NaN	NaN	NaN
3.26	-74.794	-122.81956	1125.0728	-1.562	1.2915	-0.27002	-3.185	3.063	1230.563	-0.61133	0.22168	-0.21582	-65.035	57.458	32.703	-0.41309	0.30273	0.16357	NaN	NaN	NaN	NaN	NaN	NaN
3.262	-51.56	-153.561	1125.0597	-1.3688	1.1002	-0.30274	-35.626	-8.6	1240.268	-0.82373	0.31104	-0.23438	-80.9274	43.1253	37.5402	-0.34277	0.26514	0.16699	NaN	NaN	NaN	NaN	NaN	NaN
3.264	-22.23	-165.095	1132.2109	-1.2265	0.92548	-0.3085	-106.765	-69.925	1296.001	-1.0176	0.41064	-0.2373	-69.3848	39.319	39.1621	-0.26563	0.21973	0.17139	NaN	NaN	NaN	NaN	NaN	NaN
3.266	7.549	-160.242	1142.596	-1.144	0.78056	-0.30537	-102.647	-93.974	1317.019	-1.2402	0.52637	-0.23242	-116.339	9.7299	44.4129	-0.15674	0.14209	0.17383	NaN	NaN	NaN	NaN	NaN	NaN
3.268	-12.872	-161.597	1157.634621	-1.0954	0.68925	-0.31436	-185.091	-145.81	1309.652	-1.5815	0.70166	-0.21484	-119.108	9.328	51.266	-0.10596	0.099121	0.17529	NaN	NaN	NaN	NaN	NaN	NaN
3.27	9.819	-164.078	1160.334	-1.0508	0.62891	-0.34277	-177.722	-182.436	1320.637	-1.771	0.80518	-0.19531	-136.096	1.429	64.835	-0.0092773	0.016602	0.18018	NaN	NaN	NaN	NaN	NaN	NaN
3.272	0.637999999999998	-169.688	1177.682	-0.984	0.59375	-0.36055	-165.602	-167.905	1271.133	-2.1675	1.0278	-0.1626	-109.488	5.431	54.482	0.052002	-0.034668	0.17529	NaN	NaN	NaN	NaN	NaN	NaN
3.274	-8.176	-142.7256	1179.8285	-0.90449	0.56787	-0.37226	-190.0937	-191.91	1217.543	-2.4705	1.2161	-0.14673	-125.901	-8.77363	60.028	0.10645	-0.078125	0.1665	NaN	NaN	NaN	NaN	NaN	NaN
3.276	0.286999999999999	-130.156	1212.9184	-0.81895	0.54482	-0.38125	-170.2583	-158.49124	1218.889	-2.7578	1.4297	-0.12842	-89.8386	10.1382	59.2022	0.16797	-0.12549	0.16309	NaN	NaN	NaN	NaN	NaN	NaN
3.278	3.498	-120.457	1233.6795	-0.74033	0.51611	-0.39112	-188.3283	-91.019	1194.3491	-3.0566	1.7695	-0.085938	-68.9835	23.2141	33.287	0.19385	-0.14941	0.16113	NaN	NaN	NaN	NaN	NaN	NaN
3.28	13.865	-111.928	1240.5432	-0.66846	0.48291	-0.39014	-219.481	-101.99	1174.5915	-3.1714	1.9399	-0.067871	-38.081	46.272	18.772	0.25684	-0.20117	0.1626	NaN	NaN	NaN	NaN	NaN	NaN
3.282	-7.287	-107.553	1237.9041	-0.62226	0.45166	-0.38946	-160.3638	-95.12	1186.022	-3.2515	2.1606	-0.058594	-64.8972	26.0806	14.1084	0.30372	-0.24439	0.15747	NaN	NaN	NaN	NaN	NaN	NaN
3.284	15.8948	-94.189	1247.718	-0.59844	0.41758	-0.38594	-202.539	-117.973	1153.0138	-3.1714	2.1431	-0.12305	-57.0827	8.078	6.7135	0.35547	-0.28711	0.15967	NaN	NaN	NaN	NaN	NaN	NaN
3.286	12.595	-106.301	1272.4144	-0.59453	0.39258	-0.37578	-199.16	-131.1283	1187.6068108	-3.041	1.9961	-0.29346	-12.941	-14.94723	20.6454	0.4209	-0.35059	0.14746	NaN	NaN	NaN	NaN	NaN	NaN
3.288	3.061	-110.317	1302.017	-0.61748	0.37451	-0.36797	-155.9535	-113.13	1163.694	-2.605	1.6958	-0.46631	27.742	5.0809	39.77698	0.45508	-0.37939	0.14697	NaN	NaN	NaN	NaN	NaN	NaN
3.29	-22.744	-120.482	1325.582	-0.66309	0.36279	-0.37256	-147.667	-179.6013	1140.713	-2.2827	1.4985	-0.44873	33.684	10.4552	38.3519	0.49902	-0.44189	0.14502	NaN	NaN	NaN	NaN	NaN	NaN
3.292	-23.303	-128.771	1314.1748	-0.71895	0.36367	-0.36406	-99.3948	-217.929	1190.9831	-1.7695	1.0771	-0.40381	26.985	9.3283	53.819	0.51758	-0.47852	0.14282	NaN	NaN	NaN	NaN	NaN	NaN
3.294	2.41	-118.6713	1335.5503	-0.78779	0.3833	-0.35869	-87.467	-226.7869	1192.347	-1.5339	0.88403	-0.45093	14.084	20.3094	11.053	0.52441	-0.50488	0.14258	NaN	NaN	NaN	NaN	NaN	NaN
3.296	-33.6208	-116.729	1337.223	-0.87373	0.42666	-0.34736	-69.339	-304.084	1225.505	-1.3491	0.77588	-0.50635	4.438	36.322	2.698	0.51514	-0.53467	0.14258	NaN	NaN	NaN	NaN	NaN	NaN
3.298	-44.1325	-117.716	1360.468	-0.97657	0.48613	-0.33418	3.735	-300.871	1282.279	-1.1426	0.74414	-0.55713	47.179	29.8555	-7.842	0.49805	-0.53906	0.14404	NaN	NaN	NaN	NaN	NaN	NaN
3.3	-48.101434	-120.0999	1361.8293	-1.0869	0.56445	-0.33691	8.632	-324.233	1323.997	-0.99416	0.73389	-0.57446	55.798	27.668	19.567	0.45996	-0.5332	0.14844	NaN	NaN	NaN	NaN	NaN	NaN
3.302	-42.811	-119.5637	1367.0239	-1.2031	0.65547	-0.34844	28.21	-339.047	1396.1801	-0.85889	0.7124	-0.58105	34.578	20.9022	13.7624	0.42285	-0.51733	0.15454	NaN	NaN	NaN	NaN	NaN	NaN
3.304	-55.89	-113.3573	1366.5432	-1.3077	0.75753	-0.3626	69.8907	-251.99194	1399.0877	-0.67871	0.67871	-0.57227	18.049	31.082	16.4867	0.37305	-0.49219	0.14941	NaN	NaN	NaN	NaN	NaN	NaN
3.306	-37.042	-106.336	1369.1786	-1.4143	0.86182	-0.38252	68.839	-255.018	1381.847	-0.59521	0.65234	-0.56836	7.745	33.8625	12.0475	0.31689	-0.43896	0.1543	NaN	NaN	NaN	NaN	NaN	NaN
3.308	12.128	-85.273	1361.67004	-1.5101	0.96173	-0.41046	78.619	-224.7932	1441.674	-0.44727	0.57324	-0.58008	-24.547	39.481	34.838	0.29102	-0.41406	0.15234	NaN	NaN	NaN	NaN	NaN	NaN
3.31	3.493	-63.002	1347.2609	-1.6035	1.0547	-0.43359	54.882	-202.814	1452.606	-0.35718	0.50268	-0.57202	-35.556	57.139	31.465	0.24023	-0.34814	0.15918	NaN	NaN	NaN	NaN	NaN	NaN
3.312	9.264	-47.1761	1349.573	-1.6898	1.1379	-0.4582	44.2372	-242.3774	1478.455	-0.28076	0.43701	-0.55811	-42.322	69.09	48.3786	0.20386	-0.30762	0.16064	NaN	NaN	NaN	NaN	NaN	NaN
3.314	-17.8767	-53.7288	1368.1986	-1.7649	1.2145	-0.4708	116.687	-212.119	1485.8491	-0.24219	0.35742	-0.53906	-34.63	84.133	0.876000000000001	0.17529	-0.26758	0.16113	NaN	NaN	NaN	NaN	NaN	NaN
3.316	24.8827	-47.8239	1370.1947	-1.8285	1.2867	-0.48056	90.978	-204.536	1473.486	-0.25244	0.33203	-0.53223	-70.07433	65.681	19.251	0.14648	-0.22314	0.16211	NaN	NaN	NaN	NaN	NaN	NaN
3.318	31.994	-55.238	1382.797	-1.8756	1.3458	-0.48408	66.003	-221.592	1493.606	-0.3291	0.31494	-0.49365	-91.2818	57.5376	16.466	0.13477	-0.20898	0.16357	NaN	NaN	NaN	NaN	NaN	NaN
3.32	24.7228	-41.823	1389.015	-1.9077	1.3696	-0.48682	58.013	-167.294	1492.396	-0.45288	0.35132	-0.4646	-132.501	33.33453	49.85	0.12109	-0.17285	0.15332	NaN	NaN	NaN	NaN	NaN	NaN
3.322	12.066	-54.549	1383.081	-1.93	1.3829	-0.49522	21.25	-177.798	1488.883	-0.63232	0.41846	-0.43799	-96.929	29.419	35.74	0.12011	-0.15356	0.14843	NaN	NaN	NaN	NaN	NaN	NaN
3.324	5.076	-36.641	1370.6431	-1.9468	1.3951	-0.51378	7.302	-180.0089	1541.7043	-0.93896	0.55713	-0.40674	-96.59	15.95716	76.93	0.12158	-0.13428	0.14648	NaN	NaN	NaN	NaN	NaN	NaN
3.326	18.525	-33.58	1370.831	-1.9796	1.42	-0.5298	-19.7069	-175.4598	1573.3249	-1.0996	0.63672	-0.39746	-88.8408	28.652	63.89	0.11426	-0.11719	0.13867	NaN	NaN	NaN	NaN	NaN	NaN
3.328	-4.697	-19.569	1377.8018	-2.0107	1.446	-0.54463	-61.4697	-235.608	1616.829	-1.4258	0.82617	-0.39551	-123.084	10.0972	83.927	0.10449	-0.11133	0.13623	NaN	NaN	NaN	NaN	NaN	NaN
3.33	36.0252	-32.5204	1393.109	-2.0405	1.4731	-0.54346	-42.4898	-203.259	1649.935	-1.6496	0.98364	-0.42163	-96.677	23.592	49.705	0.077148	-0.086914	0.12402	NaN	NaN	NaN	NaN	NaN	NaN
3.332	38.6162	-45.148	1398.3604	-2.0474	1.4956	-0.53333	-52.862	-165.3054	1622.3548	-1.855	1.1626	-0.45654	-103.592	3.657	40.5261	0.053711	-0.064209	0.11523	NaN	NaN	NaN	NaN	NaN	NaN
3.334	29.109	-38.1639	1366.596	-2.018	1.4858	-0.52292	-70.737	-187.487	1652.556	-2.1245	1.4146	-0.49756	-51.519	12.431	23.8772	0.026367	-0.040527	0.10742	NaN	NaN	NaN	NaN	NaN	NaN
3.336	0.00999999999999801	-23.692685	1383.2201	-1.9572	1.4436	-0.53073	-48.367	-119.804	1653.1834	-2.2598	1.5391	-0.50488	-40.963	-9.6337	52.3023	-0.012695	0.003418	0.094727	NaN	NaN	NaN	NaN	NaN	NaN
3.338	5.90199999999999	-4.8062	1369.06612	-1.8749	1.3772	-0.53828	-71.286	-145.2568	1611.9485	-2.5288	1.7739	-0.50439	-28.062	18.198	41.0238	-0.026855	0.023926	0.094238	NaN	NaN	NaN	NaN	NaN	NaN
3.34	6.052	24.12	1377.1528	-1.7925	1.2935	-0.54053	-44.249	-140.7805	1619.2436	-2.7237	1.9326	-0.50098	-14.716	13.9034	56.0123	-0.053711	0.064941	0.09082	NaN	NaN	NaN	NaN	NaN	NaN
3.342	-35.022	37.5936	1363.724	-1.7213	1.2213	-0.53934	-16.8474	-92.311	1622.236	-2.8315	2.063	-0.46973	6.75	36.3399	44.766	-0.075928	0.091066	0.09082	NaN	NaN	NaN	NaN	NaN	NaN
3.344	-58.8915	40.8507	1355.0543	-1.6769	1.155	-0.5312	-49.936	-129.562	1653.115	-3.084	2.1523	-0.52783	-23.781	4.2756	54.348	-0.09375	0.12354	0.089844	NaN	NaN	NaN	NaN	NaN	NaN
3.346	-62.4927	39.096	1347.447	-1.6501	1.1047	-0.52567	-8.3279	-84.3048	1648.871	-3.2085	2.2212	-0.62549	21.456	16.7404	59.422	-0.11719	0.14941	0.084961	NaN	NaN	NaN	NaN	NaN	NaN
3.348	-64.321	45.248	1343.2667	-1.6487	1.0649	-0.51495	-12.5575	-67.3935	1574.174	-3.1714	2.2427	-0.70947	23.098	-2.648	26.7362	-0.13525	0.16211	0.07959	NaN	NaN	NaN	NaN	NaN	NaN
3.35	-93.637	54.1968	1325.9194	-1.6504	1.0352	-0.50586	14.8938	-78.085	1582.653	-2.9888	2.0953	-0.69507	67.5329	34.0691	-4.946	-0.15771	0.18408	0.071777	NaN	NaN	NaN	NaN	NaN	NaN
3.352	-85.3817	53.778134	1306.2284	-1.6629	1.0204	-0.49811	38.111	-16.795	1595.864	-2.7441	1.8711	-0.64941	46.7721	6.4001	18.445	-0.18262	0.19653	0.068603	NaN	NaN	NaN	NaN	NaN	NaN
3.354	-66.78	41.9163	1288.869	-1.6715	1.018	-0.48931	14.8734	-42.421	1617.505	-2.4839	1.6665	-0.63428	49.1581	-13.9641	52.556	-0.19971	0.2041	0.06543	NaN	NaN	NaN	NaN	NaN	NaN
3.356	-75.4631	47.439	1280.264	-1.666	1.0158	-0.47974	54.1441	-26.36	1642.499	-2.4136	1.6255	-0.6626	-25.305	-75.647	82.97	-0.2334	0.20752	0.064453	NaN	NaN	NaN	NaN	NaN	NaN
3.358	-49.789	48.708	1284.1968	-1.6534	1.014	-0.46926	63.696	6.186	1639.9362	-2.3516	1.6602	-0.7168	12.256	-10.358	132.672	-0.24707	0.21094	0.059082	NaN	NaN	NaN	NaN	NaN	NaN
3.36	-59.6109	54.848	1276.804	-1.6304	1.0142	-0.46045	59.427	-39.0158	1635.346	-2.3112	1.7161	-0.69897	19.176	9.2627	226.0053	-0.27246	0.2085	0.048828	NaN	NaN	NaN	NaN	NaN	NaN
3.362	-43.85	58.892	1257.958	-1.5979	1.0169	-0.44974	106.678	-22.1279	1632.2644	-2.2461	1.7441	-0.6543	-3.14899999999999	36.6856	324.2421	-0.29126	0.21631	0.036865	NaN	NaN	NaN	NaN	NaN	NaN
3.364	-68.8895	63.07	1223.0707	-1.5722	1.0148	-0.43955	93.214	-17.0475	1601.80562	-2.1401	1.6938	-0.64014	-68.447	17.329	441.84	-0.31543	0.23145	0.016602	NaN	NaN	NaN	NaN	NaN	NaN
3.366	-75.14	64.5803	1223.45128	-1.5481	1.0095	-0.42869	70.5998	-29.2926	1591.7211	-2.0776	1.6353	-0.64502	-76.522	90.884	582.828	-0.35693	0.25049	0.00048828	NaN	NaN	NaN	NaN	NaN	NaN
3.368	-60.56	66.776	1198.4855	-1.5265	0.9925	-0.41898	96.219	9.9406	1585.6316	-1.9258	1.4951	-0.64258	-85.136	82.222	782.714	-0.38721	0.26465	-0.013184	NaN	NaN	NaN	NaN	NaN	NaN
3.37	-74.76	77.891	1185.7693	-1.5059	0.97656	-0.40527	33.9529	-18.5083	1555.824	-1.8142	1.3869	-0.62964	-91.845	65.177	995.345	-0.47607	0.29932	-0.049316	NaN	NaN	NaN	NaN	NaN	NaN
3.372	-58.817	89.179	1149.6574	-1.4858	0.96788	-0.39435	49.1989	-8.3086	1570.638	-1.7168	1.2715	-0.61719	-117.6168	-30.149	1151.005	-0.56006	0.33154	-0.081055	NaN	NaN	NaN	NaN	NaN	NaN
3.374	-64.315	99.112	1131.0377	-1.4665	0.95316	-0.38496	64.294	54.237	1542.207	-1.6191	1.1396	-0.60156	-100.6266	-38.779	1230.454	-0.65625	0.36816	-0.10986	NaN	NaN	NaN	NaN	NaN	NaN
3.376	-26.878	105.5384	1122.1505	-1.4466	0.94046	-0.37844	10.943	46.6724	1512.7499	-1.5811	1.0928	-0.58887	-97.899	-68.288	1301.8051	-0.81592	0.43652	-0.15186	NaN	NaN	NaN	NaN	NaN	NaN
3.378	-32.185	108.4168	1085.5643	-1.4263	0.93264	-0.36721	19.032	102.589	1513.5929	-1.5386	1.0239	-0.56934	-122.462	-31.865	1393.154	-0.96336	0.49463	-0.17968	NaN	NaN	NaN	NaN	NaN	NaN
3.38	-13.237	112.723	1065.8225	-1.4019	0.91846	-0.35645	-26.0025	122.816	1474.658	-1.5252	0.99538	-0.55493	-142.249	-56.551	1395.85	-1.1367	0.56836	-0.20264	NaN	NaN	NaN	NaN	NaN	NaN
3.382	-19.037	111.7	1052.6338	-1.3698	0.89961	-0.35128	-60.4072	98.026	1466.447	-1.5171	0.979	-0.54443	-99.468	-105.6837	1375.51	-1.4102	0.68359	-0.22754	NaN	NaN	NaN	NaN	NaN	NaN
3.384	-14.401	106.6526	1028.8184	-1.3353	0.8825	-0.34396	-32.6745	131.097	1429.246	-1.5034	0.97314	-0.52539	-39.526	-165.596	1311.785	-1.5562	0.74854	-0.23047	NaN	NaN	NaN	NaN	NaN	NaN
3.386	-32.203	120.8861	1018.3801	-1.2976	0.85972	-0.33576	-98.353	120.3877	1390.4591	-1.4956	0.9751	-0.51416	22.325	-190.034	1299.8893	-1.8613	0.875	-0.2085	NaN	NaN	NaN	NaN	NaN	NaN
3.388	-50.064	124.925	991.8171	-1.2617	0.83476	-0.32813	-66.5097	111.459	1374.3128	-1.4702	0.97705	-0.49561	72.321	-242.981	1289.41	-2.0886	0.99291	-0.17774	NaN	NaN	NaN	NaN	NaN	NaN
3.39	-62.304	113.697	982.1694	-1.2285	0.81445	-0.31787	-75.715	128.5666	1334.84	-1.4421	0.97925	-0.47388	74.8041	-269.86	1287.665	-2.3105	1.1172	-0.14551	NaN	NaN	NaN	NaN	NaN	NaN
3.392	-59.771	111.89	960.42863	-1.2	0.79324	-0.30641	-131.897	97.882	1286.923	-1.4077	0.97217	-0.4585	89.593	-243.632	1216.708	-2.6011	1.2759	-0.11035	NaN	NaN	NaN	NaN	NaN	NaN
3.394	-81.0877	114.7039	942.3722	-1.1722	0.77336	-0.29722	-98.063	108.435	1263.965	-1.3569	0.95557	-0.43115	98.569	-212.131	1193.155	-2.7124	1.3696	-0.10254	NaN	NaN	NaN	NaN	NaN	NaN
3.396	-99.7827	122.6941	926.484	-1.1456	0.75306	-0.28591	-110.083	122.0448	1241.047	-1.3315	0.94385	-0.41553	134.705	-141.179	1143.672	-2.8159	1.5103	-0.066406	NaN	NaN	NaN	NaN	NaN	NaN
3.398	-100.6876	121.7293	894.40104	-1.1228	0.74001	-0.27967	-126.66	104.579	1222.4053	-1.291	0.9082	-0.39063	134.243	-111.1	1149.871	-2.7583	1.566	-0.020508	NaN	NaN	NaN	NaN	NaN	NaN
3.4	-89.656	122.1863	860.3279	-1.0942	0.72705	-0.27197	-81.00115	142.7549	1190.812	-1.2534	0.87451	-0.37036	129.731	-119.13	1158.339	-2.6069	1.5942	0.041016	NaN	NaN	NaN	NaN	NaN	NaN
3.402	-90.2395	129.288	840.0754	-1.0657	0.70821	-0.26329	-96.1446	160.939	1146.019	-1.2202	0.84033	-0.35449	105.516	-174.945	1186.697	-2.2988	1.5645	0.14404	NaN	NaN	NaN	NaN	NaN	NaN
3.404	-77.005	129.049	821.25	-1.0312	0.69123	-0.25498	-61.5076	164.758	1129.25428	-1.1772	0.79736	-0.33398	89.919	-208.833	1170.233	-2.1421	1.5317	0.18701	NaN	NaN	NaN	NaN	NaN	NaN
3.406	-88.4144	140.4718	801.8645	-0.99642	0.67208	-0.24913	-17.833	204.797	1107.176	-1.1523	0.77344	-0.32422	99.916	-249.62	1217.841	-1.8652	1.418	0.26025	NaN	NaN	NaN	NaN	NaN	NaN
3.408	-79.2897	143.7392	771.724	-0.95861	0.64796	-0.24082	-42.403	166.4247	1082.9971	-1.1094	0.7373	-0.31055	126.371	-283.653	1201.352	-1.7041	1.3232	0.3064	NaN	NaN	NaN	NaN	NaN	NaN
3.41	-101.7721	139.9056	757.5694	-0.92578	0.62305	-0.23486	1.486	172.7351	1063.381	-1.0762	0.72314	-0.29297	159.163	-313.667	1220.362	-1.5737	1.2407	0.34375	NaN	NaN	NaN	NaN	NaN	NaN
3.412	-93.0667	144.724	752.6792	-0.8871	0.60233	-0.22412	-21.619	197.922	999.1863	-1.0527	0.70898	-0.27734	188.165	-305.91707	1238.4825	-1.4546	1.1567	0.37207	NaN	NaN	NaN	NaN	NaN	NaN
3.414	-85.3316	145.2931	727.15006	-0.85213	0.57695	-0.21445	-11.259	192.957	955.25502	-1.0171	0.7002	-0.25537	156.27	-345.42	1300.763	-1.4082	1.123	0.37939	NaN	NaN	NaN	NaN	NaN	NaN
3.416	-81.0298	164.759	681.4158	-0.81659	0.54999	-0.20313	56.873	221.77	932.6385	-0.99756	0.69189	-0.24219	116.168	-381.893	1368.883	-1.2871	1.0684	0.36377	NaN	NaN	NaN	NaN	NaN	NaN
3.418	-86.7215	159.7	641.048	-0.78095	0.52568	-0.19424	-0.464999999999996	212.988	896.86073	-0.94482	0.67627	-0.22217	54.925	-412.38	1421.974	-1.1745	1.0217	0.32568	NaN	NaN	NaN	NaN	NaN	NaN
3.42	-88.2963	148.862	630.8329	-0.74756	0.49854	-0.18701	17.4	176.4442	868.0285	-0.90405	0.64624	-0.20507	22.3541	-397.73	1464.713	-1.0449	0.96484	0.28174	NaN	NaN	NaN	NaN	NaN	NaN
3.422	-52.153	146.8054	611.5468	-0.7125	0.46914	-0.17656	9.44	182.231	834.853	-0.85059	0.6167	-0.19092	-21.22	-323.091	1480.1502	-0.87842	0.89307	0.20361	NaN	NaN	NaN	NaN	NaN	NaN
3.424	-41.143	152.8403	584.9991	-0.68096	0.44678	-0.16739	-25.521	167.602	819.846	-0.78906	0.56934	-0.17627	-50.696	-240.935247	1508.9474	-0.80615	0.854	0.15186	NaN	NaN	NaN	NaN	NaN	NaN
3.426	-16.643	139.978	576.0976	-0.64502	0.42334	-0.15683	6.444	182.2021	820.604	-0.75586	0.54688	-0.16748	-114.294	-197.693	1489.131	-0.69531	0.77637	0.04834	NaN	NaN	NaN	NaN	NaN	NaN
3.428	-15.776	133.658	558.117	-0.61524	0.40322	-0.14287	-32.389	217.077	773.106	-0.69287	0.49854	-0.1416	-122.662	-157.185	1491.406	-0.63575	0.73145	-0.033447	NaN	NaN	NaN	NaN	NaN	NaN
3.43	-0.474000000000004	142.2993	543.4928	-0.58447	0.38281	-0.13525	-48.347	206.3448	705.9702	-0.6504	0.4668	-0.12793	-82.136	-132.885	1503.6143	-0.60254	0.69336	-0.10254	NaN	NaN	NaN	NaN	NaN	NaN
3.432	3.59	158.6948	509.1006	-0.55654	0.36612	-0.12314	-14.005	219.847	677.22471	-0.60498	0.43994	-0.11279	-64.103	-126.088	1571.935	-0.60107	0.67871	-0.1626	NaN	NaN	NaN	NaN	NaN	NaN
3.434	6.39	156.591	493.1699	-0.52403	0.34648	-0.11201	-71.7751	215.671	654.135	-0.5542	0.39941	-0.092285	-69.161	-125.858	1592.0313	-0.62061	0.6792	-0.1792	NaN	NaN	NaN	NaN	NaN	NaN
3.436	-3.3	148.592	491.521	-0.4998	0.32891	-0.097949	-67.9345	182.674	651.366	-0.52881	0.38232	-0.081543	-67.737	-119.7941	1588.03	-0.68799	0.70752	-0.18408	NaN	NaN	NaN	NaN	NaN	NaN
3.438	-25.544	138.658	451.6834	-0.47656	0.30674	-0.082129	-70.3687	189.18261	601.309	-0.47412	0.34619	-0.068848	-50.6936	-140.875	1552.408	-0.75489	0.73828	-0.1919	NaN	NaN	NaN	NaN	NaN	NaN
3.44	-22.446	131.324	444.2573	-0.4458	0.29102	-0.066895	-119.939	166.285	544.0291	-0.43579	0.32373	-0.053711	-25.92	-142.637	1605.517	-0.83887	0.78125	-0.18604	NaN	NaN	NaN	NaN	NaN	NaN
3.442	-26.66	142.108	414.29271	-0.42158	0.27148	-0.061914	-95.3995	140.398	508.4683	-0.39551	0.29736	-0.040527	-39.515	-116.415	1671.962	-0.98828	0.86523	-0.20752	NaN	NaN	NaN	NaN	NaN	NaN
3.444	-35.146	139.0299	391.4775	-0.39375	0.25332	-0.049707	-129.428	172.5085	443.95	-0.3418	0.27051	-0.022949	-55.264	-112.914	1737.503	-1.0762	0.91016	-0.23047	NaN	NaN	NaN	NaN	NaN	NaN
3.446	-19.478	135.1302	367.1491	-0.37422	0.23614	-0.037207	-148.965	164.568	399.0213	-0.30249	0.2522	-0.016601	-58.729	-132.1013	1751.744	-1.2773	1.0195	-0.271	NaN	NaN	NaN	NaN	NaN	NaN
3.448	-29.658	124.9984	348.0844	-0.34697	0.21767	-0.027442	-105.059	190.1344	361.258	-0.26074	0.2334	-0.003418	-38.7328	-153.402	1808.983	-1.4805	1.1416	-0.28687	NaN	NaN	NaN	NaN	NaN	NaN
3.45	-35.009	119.9747	329.751	-0.32813	0.20068	-0.015625	-134.9	197.841	328.096	-0.21484	0.21045	0.0029297	5.734	-161.022682	1845.165	-1.73	1.2954	-0.29639	NaN	NaN	NaN	NaN	NaN	NaN
3.452	-23.977	126.2603	316.2451	-0.29922	0.1835	-0.010254	-96.751	153.401	345.5785	-0.19482	0.20459	0.0063477	67.4356	-139.3982	1879.315	-2.1309	1.5605	-0.2876	NaN	NaN	NaN	NaN	NaN	NaN
3.454	-24.828	131.0844	292.543	-0.27197	0.17051	-0.0067383	-70.9024	169.4238	314.754	-0.15576	0.1792	0.020996	88.0295	-102.744	1833.513	-2.3628	1.6997	-0.27881	NaN	NaN	NaN	NaN	NaN	NaN
3.456	-49.791	125.4679	291.96966	-0.25088	0.15371	-0.002832	-84.5686	166.418	267.551	-0.12597	0.16406	0.020264	81.951	-71.3517	1788.8904	-2.8242	1.9746	-0.30029	NaN	NaN	NaN	NaN	NaN	NaN
3.458	-65.6823	115.8379	292.0109	-0.22646	0.1415	0.00058595	-21.1	142.3407	247.0576	-0.099121	0.14648	0.02832	84.346	-53.343	1742.87	-3.1159	2.1673	-0.27954	NaN	NaN	NaN	NaN	NaN	NaN
3.46	-78.049	113.8752	251.6441	-0.20068	0.13428	0.0029297	-54.007	169.693	219.2089	-0.067383	0.13086	0.032715	82.954	-43.508	1752.434	-3.353	2.3364	-0.2373	NaN	NaN	NaN	NaN	NaN	NaN
3.462	-78.0213	122.9084	234.9283	-0.17696	0.12236	0.0078125	-30.025	138.5326	206.7526	-0.054688	0.12402	0.039551	130.115	-7.815	1738.3205	-3.521	2.5044	-0.17188	NaN	NaN	NaN	NaN	NaN	NaN
3.464	-89.3677	112.85	225.9655	-0.15498	0.11279	0.008789	13.326	132.257	179.9	-0.035156	0.10938	0.046387	126.123	-5.927	1734.399	-3.5288	2.5513	-0.15234	NaN	NaN	NaN	NaN	NaN	NaN
3.466	-83.5703	105.9931	217.4562	-0.13702	0.11045	0.026758	-13.362	143.5242	147.411	-0.024415	0.10376	0.051269	92.998	23.227	1706.0196	-3.3882	2.5591	-0.12646	NaN	NaN	NaN	NaN	NaN	NaN
3.468	-66.367	106.9856	191.8473	-0.11885	0.10186	0.019336	29.057	85.4597	155.9362	-0.019043	0.097168	0.057129	17.369	45.547	1713.472	-3.1982	2.4941	-0.12525	NaN	NaN	NaN	NaN	NaN	NaN
3.47	-53.804	106.3701	153.256	-0.10156	0.09668	0.022949	35.634	96.926	152.4097	-0.016602	0.091309	0.06543	-4.058	66.992	1698.198	-2.9976	2.4048	-0.13428	NaN	NaN	NaN	NaN	NaN	NaN
3.472	-48.635	92.7233	155.5661	-0.091992	0.094141	0.029883	-7.731	109.4131	113.94594	-0.022949	0.09082	0.072266	-8.48	63.8275	1718.383	-2.7573	2.2642	-0.12646	NaN	NaN	NaN	NaN	NaN	NaN
3.474	-46.151	89.5005	176.4149	-0.07627	0.091015	0.031054	42.213	67.54447	110.01515	-0.031738	0.097168	0.081543	-5.066	71.977	1697.957	-2.666	2.2031	-0.12109	NaN	NaN	NaN	NaN	NaN	NaN
3.476	-14.507	83.716	165.417	-0.061426	0.092187	0.039258	31.433	100.611	70.7809	-0.039551	0.094482	0.084961	-49.0155	59.683	1700.079	-2.521	2.0981	-0.081543	NaN	NaN	NaN	NaN	NaN	NaN
3.478	-15.752	96.6416	144.63955	-0.05127	0.092676	0.042773	22.348	58.4563	77.837	-0.047852	0.1001	0.093262	-78.1068	62.13944	1683.394	-2.415	2.0019	-0.06958	NaN	NaN	NaN	NaN	NaN	NaN
3.48	-21.447	86.5674	131.2046	-0.037109	0.088867	0.045898	43.337	53.099	78.1739	-0.05957	0.10254	0.099121	-116.859	51.2466	1653.278	-2.3027	1.8828	-0.068359	NaN	NaN	NaN	NaN	NaN	NaN
3.482	-28.067	80.321	144.4335	-0.021777	0.089942	0.053711	-6.227	90.494	42.767	-0.062988	0.10791	0.098145	-101.754	69.009	1619.6968	-2.1304	1.7104	-0.055664	NaN	NaN	NaN	NaN	NaN	NaN
3.484	-19.1	79.7284	125.14823	-0.0091798	0.089844	0.058496	-5.336	57.9862	49.6863	-0.069336	0.1123	0.10645	-112.212	30.853	1611.331	-2.0508	1.6367	-0.057129	NaN	NaN	NaN	NaN	NaN	NaN
3.486	-26.583	78.972	125.6098	-0.00019531	0.084766	0.060059	-11.244	77.285	45.2653	-0.076905	0.11914	0.10815	-51.406	43.136	1600.277	-1.9023	1.4951	-0.072754	NaN	NaN	NaN	NaN	NaN	NaN
3.488	-22.766	76.628	107.0502	0.012891	0.08457	0.065332	-66.41969	64.0049	36.6319	-0.074219	0.12256	0.10742	-73.2518	57.798	1589.7263	-1.8147	1.4084	-0.084961	NaN	NaN	NaN	NaN	NaN	NaN
3.49	-22.527	66.302	94.0014	0.023926	0.077148	0.068848	-35.295	16.7436	45.9274	-0.073242	0.12744	0.11182	-84.035	131.17	1548.588	-1.7339	1.3296	-0.087402	NaN	NaN	NaN	NaN	NaN	NaN
3.492	-6.276	56.5563	94.2831	0.031543	0.074121	0.069434	-76.51927	55.935	5.591	-0.071777	0.125	0.11035	-128.639	155.162	1535.201	-1.668	1.2461	-0.086914	NaN	NaN	NaN	NaN	NaN	NaN
3.494	-6.899	60.86693	98.9808	0.03916	0.067578	0.07168	-99.286	23.6446	13.10762	-0.061523	0.12402	0.10889	-92.334	214.548	1503.4495	-1.646	1.2173	-0.083496	NaN	NaN	NaN	NaN	NaN	NaN
3.496	-4.552	65.0465	90.167	0.039551	0.058594	0.076757	-71.4451	-3.7869	33.4662	-0.048828	0.11621	0.10717	-93.395	196.743	1503.4093	-1.6191	1.1699	-0.080078	NaN	NaN	NaN	NaN	NaN	NaN
3.498	-17.965	52.7942	72.765	0.041504	0.049023	0.081836	-111.092	38.7485	16.4806	-0.039551	0.10889	0.10889	-65.385	234.614	1452.0257	-1.6033	1.1448	-0.075928	NaN	NaN	NaN	NaN	NaN	NaN
3.5	-10.009	51.49	58.5513	0.046875	0.043457	0.082031	-72.1782	4.055	12.7967	-0.01709	0.096191	0.10742	-48.5049	200.832	1419.562	-1.5815	1.1196	-0.076172	NaN	NaN	NaN	NaN	NaN	NaN
3.502	-45.493	47.704	70.0136	0.045312	0.034961	0.085254	-73.8626	24.1754	5.41	-0.0058594	0.083496	0.11035	-16.665	244.783	1375.6847	-1.5347	1.0864	-0.077637	NaN	NaN	NaN	NaN	NaN	NaN
3.504	-36.029	49.928312	63.99909	0.044629	0.027344	0.084277	-102.077	41.7512	26.4853	0.018066	0.067871	0.10938	14.417	222.295	1360.658	-1.5054	1.063	-0.07959	NaN	NaN	NaN	NaN	NaN	NaN
3.506	-36.605	50.7194	57.657	0.043066	0.021485	0.086621	-61.4601	10.2505	54.722	0.036621	0.051269	0.10254	81.089	265.05924	1304.249	-1.4272	1.02	-0.078125	NaN	NaN	NaN	NaN	NaN	NaN
3.508	-54.454	52.257	46.485	0.044336	0.013867	0.081738	-86.818	67.494	33.021	0.058105	0.038574	0.10205	94.322	214.364	1265.3574	-1.3725	0.98535	-0.072998	NaN	NaN	NaN	NaN	NaN	NaN
3.51	-77.1862	43.765	50.1419	0.050781	0.0087891	0.083008	-70.651	34.9553	26.7527	0.088867	0.017578	0.10205	127.252	231.315	1240.591	-1.3159	0.95459	-0.069336	NaN	NaN	NaN	NaN	NaN	NaN
3.512	-75.1467	38.0515	55.864	0.049414	0.0024414	0.085059	-20.679	9.4114	42.215	0.10449	0.0053711	0.10352	127.666	195.51	1236.573	-1.2461	0.91162	-0.05957	NaN	NaN	NaN	NaN	NaN	NaN
3.514	-60.7875	39.8976	40.2875	0.05166	-0.002832	0.082031	-59.9878	55.3896	21.7307	0.1333	-0.013672	0.095215	123.374	257.0337	1223.67	-1.2095	0.89111	-0.054199	NaN	NaN	NaN	NaN	NaN	NaN
3.516	-60.15832	37.0316	34.5046	0.050488	-0.0086914	0.078907	1.522	6.627	45.3267	0.1582	-0.027588	0.09839	125.056	243.976	1181.153	-1.1367	0.84766	-0.050293	NaN	NaN	NaN	NaN	NaN	NaN
3.518	-52.906	25.138	38.0739	0.051953	-0.010058	0.086816	13.929	44.347	26.204	0.18408	-0.048828	0.097656	115.414	271.099	1138.531	-1.0803	0.81372	-0.048584	NaN	NaN	NaN	NaN	NaN	NaN
3.52	-55.118	22.215	41.1733	0.050293	-0.015137	0.087891	-4.866	55.494	19.9063	0.21826	-0.069336	0.091797	61.472	187.2424	1080.953	-1.0313	0.78223	-0.052246	NaN	NaN	NaN	NaN	NaN	NaN
3.522	-43.515	34.951	20.613	0.046484	-0.015527	0.084766	48.8047	4.9683	45.728	0.23584	-0.082031	0.087402	65.189	228.2792	1047.044	-0.95703	0.74023	-0.054199	NaN	NaN	NaN	NaN	NaN	NaN
3.524	-59.16055	41.7574	19.1612	0.043652	-0.018359	0.087109	16.051	42.232	35.9439	0.27148	-0.10596	0.084473	70.361	212.0541	1018.448	-0.92236	0.71924	-0.054199	NaN	NaN	NaN	NaN	NaN	NaN
3.526	-64.3502	34.0355	34.081	0.043262	-0.015234	0.086719	26.172	9.7457	44.497	0.29785	-0.12622	0.07666	68.073	302.6014	965.4547	-0.83936	0.67041	-0.058594	NaN	NaN	NaN	NaN	NaN	NaN
3.528	-36.889	30.3929	47.1565	0.046387	-0.012598	0.089746	58.5462	-6.9864	37.8798	0.32715	-0.14404	0.070801	64.086	253.68	902.1862	-0.76172	0.60645	-0.060547	NaN	NaN	NaN	NaN	NaN	NaN
3.53	-27.618	26.3003	35.8708	0.04834	-0.0073242	0.087402	-5.214	33.32415	32.8607	0.36035	-0.16797	0.061523	47.355	283.616	836.158	-0.72119	0.57666	-0.067871	NaN	NaN	NaN	NaN	NaN	NaN
3.532	-35.819	29.7184	24.8403	0.047852	-0.003711	0.088672	35.3214	-17.5517	62.367	0.37402	-0.17871	0.058594	23.8497	233.073	789.891	-0.646	0.50928	-0.077148	NaN	NaN	NaN	NaN	NaN	NaN
3.534	-31.791	17.7443	32.30207	0.05166	-0.0015625	0.091601	19.414	6.6125	41.5642	0.39355	-0.1958	0.051758	30.631	278.305	755.229	-0.59449	0.45948	-0.080567	NaN	NaN	NaN	NaN	NaN	NaN
3.536	-15.675	16.7547	45.0268	0.055566	-0.00039064	0.090429	-15.211	19.325	18.301	0.40283	-0.2063	0.050781	39.445	237.505	713.4833	-0.54639	0.41895	-0.089355	NaN	NaN	NaN	NaN	NaN	NaN
3.538	-7.959	22.5114	33.0167	0.05918	-0.00029295	0.089258	20.405	-19.711	37.3653	0.40332	-0.2168	0.049805	-41.655	270.446	684.911	-0.48779	0.3667	-0.090332	NaN	NaN	NaN	NaN	NaN	NaN
3.54	-7.527	21.8401	31.97923	0.058594	0.0039063	0.087891	-35.437	50.688	27.742	0.39404	-0.22705	0.054199	-61.638	213.2586	618.2635	-0.46533	0.34277	-0.097168	NaN	NaN	NaN	NaN	NaN	NaN
3.542	12.219	25.1371	23.9025	0.063281	0.0043945	0.085937	-31.391	31.4751	32.694	0.39209	-0.22168	0.046387	-95.384	256.029	580.349	-0.4126	0.30127	-0.104	NaN	NaN	NaN	NaN	NaN	NaN
3.544	-10.741	25.8686	19.164	0.064844	0.0058594	0.088867	-30.854	3.7514	21.0819	0.37354	-0.2207	0.053711	-86.12	217.7595	509.785	-0.37036	0.27661	-0.11572	NaN	NaN	NaN	NaN	NaN	NaN
3.546	-5.597	34.3838	37.4679	0.069141	0.0039063	0.086524	-90.333	43.8169	-5.663	0.34888	-0.21021	0.054931	-81.545	268.098	490.488	-0.3208	0.25146	-0.12158	NaN	NaN	NaN	NaN	NaN	NaN
3.548	-8.775	36.528	36.2482	0.070313	0.0046875	0.085742	-64.3801	-26.7059	28.4697	0.32373	-0.19141	0.062012	-46.50447	211.964	436.7235	-0.25293	0.22168	-0.13037	NaN	NaN	NaN	NaN	NaN	NaN
3.55	-8.648	32.2567	37.7851	0.070801	0.0073242	0.085449	-81.0794	15.9409	15.255	0.27881	-0.16064	0.061523	-61.48813	229.471	400.079	-0.21924	0.21143	-0.13184	NaN	NaN	NaN	NaN	NaN	NaN
3.552	-18.196	33.9233	35.5697	0.070703	0.01416	0.087695	-100.023	40.175	4.448	0.25781	-0.146	0.066406	-41.3199	191.935	339.684	-0.15381	0.1748	-0.13721	NaN	NaN	NaN	NaN	NaN	NaN
3.554	-27.045	11.5091	59.762059	0.070996	0.020313	0.083399	-64.0967	4.1713	7.984	0.20605	-0.10693	0.070313	-21.9747	211.7401	308.9507	-0.10938	0.14258	-0.14429	NaN	NaN	NaN	NaN	NaN	NaN
3.556	-33.833	-11.0907	74.9872	0.068262	0.028906	0.081836	-99.596	66.581	-3.404	0.17724	-0.076172	0.077881	8.064	157.283	269.032	-0.062988	0.11084	-0.15186	NaN	NaN	NaN	NaN	NaN	NaN
3.558	-40.199	-18.016	85.3206	0.071387	0.035938	0.075195	-98.104	17.01575	28.6419	0.14453	-0.041504	0.081543	20.951	176.4508	246.945	-0.0092773	0.071777	-0.15869	NaN	NaN	NaN	NaN	NaN	NaN
3.56	-27.779	-0.539999999999999	66.6149	0.074219	0.050781	0.068359	-46.3443	6.62992	37.439	0.10547	-0.0087891	0.083984	25.565	165.71048	201.7877	0.013184	0.05127	-0.16504	NaN	NaN	NaN	NaN	NaN	NaN
3.562	-49.064	-15.704	92.6055	0.076563	0.061328	0.065137	-75.3222	45.6475	24.34467	0.086914	0.0073242	0.082031	12.423	213.97	164.626	0.042969	0.02002	-0.16895	NaN	NaN	NaN	NaN	NaN	NaN
3.564	-72.86883	-38.8868	148.939	0.079395	0.073926	0.062695	-47.86366	-14.1333	22.3017	0.060547	0.036133	0.087402	22.241	193.079	129.725	0.055419	-0.0043943	-0.16407	NaN	NaN	NaN	NaN	NaN	NaN
3.566	-73.135	-49.6003	196.638	0.080176	0.085644	0.054883	-47.08	10.5043	27.0568	0.045898	0.053956	0.08667	17.202	181.714	146.2624	0.060059	-0.023438	-0.16113	NaN	NaN	NaN	NaN	NaN	NaN
3.568	-87.481	-40.154	248.803	0.082227	0.091211	0.051856	-54.5902	29.0797	12.23	0.03418	0.069336	0.086426	43.762	128.677	120.4	0.049316	-0.04541	-0.15674	NaN	NaN	NaN	NaN	NaN	NaN
3.57	-96.336	-26.664	366.783	0.080566	0.099609	0.049805	3.424	-8.1438	15.0219	0.020508	0.084961	0.079102	54.4029	115.527	116.845	0.038574	-0.051758	-0.15479	NaN	NaN	NaN	NaN	NaN	NaN
3.572	-99.817	-19.4005	509.772	0.071387	0.11152	0.046875	-0.864999999999995	61.095	-0.895000000000001	0.019043	0.093262	0.076172	77.026	91.741	84.113	0.0097656	-0.057617	-0.15137	NaN	NaN	NaN	NaN	NaN	NaN
3.574	-107.961	-19.98702	591.667	0.049707	0.129	0.049121	-1.952	32.2739	16.3885	0.003418	0.10742	0.074219	43.281	78.761	89.8098	-0.011719	-0.062256	-0.14869	NaN	NaN	NaN	NaN	NaN	NaN
3.576	-102.559	-21.112	618.713	0.024707	0.14385	0.04795	25.603	23.36262	44.231	-0.007324	0.11425	0.068116	39.664	64.2353	68.0563	-0.036621	-0.061035	-0.14258	NaN	NaN	NaN	NaN	NaN	NaN
3.578	-69.50821	-33.217	671.50791	-0.009082	0.16026	0.045703	9.98	76.663	24.1978	-0.018066	0.12207	0.065918	19.322	44.671	73.6104	-0.056641	-0.058594	-0.14844	NaN	NaN	NaN	NaN	NaN	NaN
3.58	-48.1883	-15.228	764.889	-0.055664	0.17188	0.035156	47.3297	25.903	45.231	-0.035156	0.13818	0.057617	32.215	38.486	43.0045	-0.067871	-0.05127	-0.15039	NaN	NaN	NaN	NaN	NaN	NaN
3.582	-62.4457	-1.741	843.235	-0.10606	0.19023	0.016699	37.954	45.328	37.9054	-0.041016	0.14746	0.056641	-15.646	17.017	55.6898	-0.093262	-0.05127	-0.15527	NaN	NaN	NaN	NaN	NaN	NaN
3.584	-45.2538	-0.82	830.067	-0.16231	0.2124	-0.0035156	17.805	45.3721	30.7679	-0.058105	0.16943	0.055176	-23.508	19.655	54.9475	-0.10278	-0.04956	-0.1582	NaN	NaN	NaN	NaN	NaN	NaN
3.586	-21.5891	-33.8837	833.8681	-0.23144	0.23389	-0.029297	38.189	1.9832	44.215	-0.074951	0.18579	0.054931	-62.165	7.0571	71.9076	-0.11426	-0.048828	-0.16846	NaN	NaN	NaN	NaN	NaN	NaN
3.588	22.4226	-47.5967	886.6118	-0.30645	0.26074	-0.045605	-3.853	71.103	10.7172	-0.084473	0.2002	0.04834	-81.7653	21.81045	60.869	-0.13428	-0.046387	-0.17041	NaN	NaN	NaN	NaN	NaN	NaN
3.59	14.86424	-58.8949	944.2806	-0.4082	0.2915	-0.048828	-11.968	31.81776	11.3357	-0.099121	0.21973	0.04541	-75.123162	-17.5838	48.991	-0.14844	-0.040039	-0.1748	NaN	NaN	NaN	NaN	NaN	NaN
3.592	39.401	-50.816	967.7787	-0.53828	0.33477	-0.059375	3.82400000000001	11.8061	33.5579	-0.10913	0.23413	0.042968	-93.359	-8.758	41.998	-0.18359	-0.032715	-0.17529	NaN	NaN	NaN	NaN	NaN	NaN
3.594	60.804	-49.718	984.8389	-0.69248	0.3915	-0.069531	-45.477	41.5995	36.1268	-0.1167	0.24561	0.044434	-107.59	-27.4993	54.4588	-0.2168	-0.023437	-0.17041	NaN	NaN	NaN	NaN	NaN	NaN
3.596	62.2886	-55.8051	1019.049	-0.87217	0.4626	-0.075	-18.662	-11.8971	37.629	-0.12451	0.26025	0.038574	-103.4849	30.248	47.315	-0.24854	-0.0092773	-0.1665	NaN	NaN	NaN	NaN	NaN	NaN
3.598	53.066	-36.798	1016.846	-1.0646	0.54648	-0.069336	-39.875	17.8971226	60.5439	-0.12207	0.26758	0.035645	-92.2945	17.85	25.941	-0.30322	0.0068359	-0.16309	NaN	NaN	NaN	NaN	NaN	NaN
3.6	47.5688	-6.731	1021.254	-1.271	0.646	-0.053223	-74.066	-5.1741	87.0036	-0.12207	0.27393	0.02832	-91.782	61.974	-1.482	-0.33594	0.020996	-0.16064	NaN	NaN	NaN	NaN	NaN	NaN
3.602	54.243	22.212	1016.8451	-1.4813	0.754	-0.050586	-52.924	-65.589	131.326	-0.11987	0.28174	0.023193	-109.582	-4.025	-9.041	-0.39209	0.043945	-0.15088	NaN	NaN	NaN	NaN	NaN	NaN
3.604	38.6015	6.805	1024.9658	-1.6773	0.88565	-0.044824	-99.2847	22.0817	135.8018	-0.11621	0.28613	0.013184	-82.2947	24.863	-11.7775	-0.43506	0.065186	-0.14087	NaN	NaN	NaN	NaN	NaN	NaN
3.606	2.8932	-21.794	1003.6553	-1.8402	1.0274	-0.035449	-78.1469	10.2068	161.4467	-0.11133	0.29443	-0.011719	-86.0244	-9.5727	7.061	-0.47412	0.081543	-0.12549	NaN	NaN	NaN	NaN	NaN	NaN
3.608	7.535	-60.4994	1011.222	-1.9754	1.1719	-0.02539	-92.4705	1.3794	248.302	-0.10791	0.30371	-0.021484	-67.2009	48.479	22.1576	-0.52344	0.11719	-0.10986	NaN	NaN	NaN	NaN	NaN	NaN
3.61	34.6334	-91.055	1025.82036	-2.0776	1.3091	-0.020996	-159.923	49.2725	348.198	-0.11865	0.32129	-0.053223	-56.368	5.282	39.606	-0.54004	0.13184	-0.09668	NaN	NaN	NaN	NaN	NaN	NaN
3.612	45.44326	-101.091	1024.5636	-2.1285	1.4328	-0.031836	-130.52021	14.806	488.187	-0.14258	0.34009	-0.074952	-37.265	54.949	22.3233	-0.55908	0.15625	-0.077637	NaN	NaN	NaN	NaN	NaN	NaN
3.614	28.934	-119.834126	1016.8872	-2.1215	1.5156	-0.041211	-104.464	62.57278	642.366	-0.17627	0.35645	-0.097168	-31.551	25.3089	-2.781	-0.55469	0.17187	-0.059815	NaN	NaN	NaN	NaN	NaN	NaN
3.616	29.8343	-126.8126	997.8353	-2.0574	1.5242	-0.047852	-113.8119	51.129	774.895	-0.25684	0.3833	-0.14502	-22.328	77.405	-0.439999999999998	-0.54004	0.18018	-0.041992	NaN	NaN	NaN	NaN	NaN	NaN
3.618	16.731	-153.7244	1015.213	-1.9397	1.4724	-0.058008	-122.142	-56.982	905.414	-0.30566	0.41113	-0.15723	23.738	21.6283	8.708	-0.50049	0.18359	-0.025391	NaN	NaN	NaN	NaN	NaN	NaN
3.62	-11.084	-163.008	1042.514	-1.7964	1.3755	-0.062988	-140.682	-22.822	976.18	-0.42627	0.45215	-0.20947	13.049	57.016	38.484	-0.4707	0.17822	-0.021484	NaN	NaN	NaN	NaN	NaN	NaN
3.622	-30.455	-179.922	1061.837	-1.6441	1.2674	-0.06836	-119.697	-59.455	1058.45602	-0.54688	0.4917	-0.24903	35.486	12.419	26.4532	-0.39111	0.16406	-0.016602	NaN	NaN	NaN	NaN	NaN	NaN
3.624	-63.8949	-176.25	1094.41	-1.5075	1.163	-0.056836	-79.056	-33.149	1131.5191	-0.69287	0.53564	-0.27637	40.924	49.21	25.7195	-0.31494	0.13818	-0.014892	NaN	NaN	NaN	NaN	NaN	NaN
3.626	-71.8185	-164.025	1106.599	-1.4063	1.0783	-0.038868	-65.544	5.821	1164.914	-0.94092	0.63135	-0.29053	55.6649	14.1135	20.3571	-0.22998	0.10889	-0.018555	NaN	NaN	NaN	NaN	NaN	NaN
3.628	-79.256	-144.749	1112.7997	-1.3353	1.0148	-0.0071288	-41.0738	-105.8515	1188.508	-1.0957	0.68359	-0.30273	30.997	59.517	53.364	-0.11572	0.058594	-0.021973	NaN	NaN	NaN	NaN	NaN	NaN
3.63	-74.486	-132.019	1099.624	-1.293	0.96973	0.020508	-4.2834	-125.522	1202.016	-1.4375	0.81152	-0.31104	25.187	47.045	42.786	-0.060059	0.030273	-0.021973	NaN	NaN	NaN	NaN	NaN	NaN
3.632	-72.976	-130.075	1123.955	-1.2524	0.9457	0.031836	23.047	-127.869	1222.881	-1.7175	0.92798	-0.30566	17.193	85.911	43.821	0.043945	-0.027344	-0.027832	NaN	NaN	NaN	NaN	NaN	NaN
3.634	-35.945	-131.13	1157.091	-1.2019	0.9251	0.04414	77.715	-178.946	1232.299	-2.0112	1.0435	-0.28467	17.098	45.504	47.189	0.10596	-0.062745	-0.031983	NaN	NaN	NaN	NaN	NaN	NaN
3.636	-46.1587	-139.644	1184.841	-1.1374	0.91299	0.05664	55.412	-145.191	1197.089	-2.3984	1.2051	-0.25439	-20.084	57.471	59.4134	0.15381	-0.09668	-0.035156	NaN	NaN	NaN	NaN	NaN	NaN
3.638	-55.8555	-152.49	1205.206	-1.0614	0.89756	0.058594	60.2129	-192.838	1180.262	-2.5679	1.2915	-0.24121	-48.6783	14.3966	51.1563	0.21582	-0.13379	-0.040527	NaN	NaN	NaN	NaN	NaN	NaN
3.64	-51.0635	-142.523	1229.796	-0.98096	0.86768	0.054688	100.369	-169.9103	1148.2772	-2.8027	1.5176	-0.18359	-60.318	38.2957	58.449	0.23828	-0.15088	-0.043457	NaN	NaN	NaN	NaN	NaN	NaN
3.642	-29.708	-145.841	1243.89776	-0.90615	0.8208	0.062597	52.1942	-91.199	1125.549	-2.8582	1.7024	-0.12182	-40.868	8.738	54.775	0.29443	-0.18066	-0.047363	NaN	NaN	NaN	NaN	NaN	NaN
3.644	-28.5	-143.6	1252.973	-0.83857	0.76455	0.06377	83.8	-93.661	1169.109	-2.8237	1.854	-0.077148	-69.7348	26.26541	62.646	0.32764	-0.20264	-0.052735	NaN	NaN	NaN	NaN	NaN	NaN
3.646	-36.003	-144.0758	1272.231	-0.78818	0.70713	0.07002	44.202	-70.98	1179.125	-2.5894	1.9087	-0.085938	-76.2277	1.372	55.285	0.35889	-0.22168	-0.058105	NaN	NaN	NaN	NaN	NaN	NaN
3.648	-47.0108	-139.8894	1298.7644	-0.75303	0.65088	0.062793	-16.9039	-85.924	1186.0389	-2.396	1.8638	-0.098633	-91.9077	10.496	54.8752	0.3877	-0.24854	-0.066406	NaN	NaN	NaN	NaN	NaN	NaN
3.65	-33.576	-138.431	1321.65175	-0.73584	0.58643	0.047852	14.61815	-129.194	1176.6241	-1.9175	1.6489	-0.094727	-102.762	2.209	41.2247	0.40088	-0.26172	-0.069824	NaN	NaN	NaN	NaN	NaN	NaN
3.652	-21.696	-133.556	1350.4248	-0.73272	0.52939	0.0099611	-24.12666	-114.455	1147.575	-1.5879	1.4472	-0.069092	-101.1197	-2.674	44.658	0.40088	-0.27881	-0.070801	NaN	NaN	NaN	NaN	NaN	NaN
3.654	-6.794	-133.277	1380.041	-0.73779	0.48271	-0.018555	-30.4466	-180.751	1182.48351	-1.3379	1.2715	-0.038086	-92.839	-0.927999999999997	35.0056	0.39526	-0.28931	-0.075927	NaN	NaN	NaN	NaN	NaN	NaN
3.656	0.543999999999997	-137.1083	1394.367	-0.75029	0.44443	-0.044727	51.6462	-216.195	1182.027	-1.1621	1.123	0.0024414	-124.951	-2.317	23.692	0.38232	-0.29492	-0.077637	NaN	NaN	NaN	NaN	NaN	NaN
3.658	18.895	-132.2582	1382.097	-0.77022	0.42148	-0.062305	21.539	-218.8883	1200.4152	-1.1172	1.084	0.023438	-88.033	11.993	21.98	0.3623	-0.2915	-0.081055	NaN	NaN	NaN	NaN	NaN	NaN
3.66	10.758	-119.634	1365.773	-0.79639	0.41846	-0.081543	49.899	-265.577	1222.83	-1.0703	1.0645	0.060547	-84.03307	-2.633	29.966	0.34424	-0.29199	-0.076172	NaN	NaN	NaN	NaN	NaN	NaN
3.662	-9.436	-98.582	1370.93281	-0.84473	0.42793	-0.10166	59.238	-268.197	1265.681	-1.0323	1.0669	0.067871	-62.5077	14.7471	20.1123	0.31982	-0.2832	-0.076172	NaN	NaN	NaN	NaN	NaN	NaN
3.664	-24.88	-97.1314	1390.374	-0.90049	0.4583	-0.11709	-25.0304	-289.827	1316.684	-0.97607	1.0591	0.066895	-71.7144	10.3254	34.5993	0.29296	-0.2705	-0.073243	NaN	NaN	NaN	NaN	NaN	NaN
3.666	-16.25	-90.9441	1378.801	-0.97393	0.49502	-0.14326	-11.806	-321.851	1356.439	-0.87109	1.0313	0.055176	-14.556	38.8488	7.7329	0.26367	-0.25732	-0.069336	NaN	NaN	NaN	NaN	NaN	NaN
3.668	-30.642	-93.3437	1371.3098	-1.0724	0.54405	-0.17549	-45.244	-250.792	1368.851	-0.81982	0.99658	0.039551	-36.185	17.0874	-9.32	0.23096	-0.23682	-0.066406	NaN	NaN	NaN	NaN	NaN	NaN
3.67	-53.615	-80.594	1390.717	-1.1875	0.61133	-0.20459	-94.668	-212.1033	1380.549	-0.73193	0.90088	0.0024414	7.89	50.9734	-16.41	0.21533	-0.22852	-0.064941	NaN	NaN	NaN	NaN	NaN	NaN
3.672	-63.3663	-72.052	1390.463	-1.3167	0.69756	-0.22803	-83.522	-181.787	1394.241	-0.68897	0.81201	-0.050049	17.582	12.6845	9.838	0.17871	-0.20996	-0.069336	NaN	NaN	NaN	NaN	NaN	NaN
3.674	-53.689	-72.316	1393.372	-1.455	0.80762	-0.23906	-119.084	-155.648	1402.5537	-0.6709	0.72168	-0.104	16.348	50.8317	2.7529	0.16187	-0.19971	-0.067871	NaN	NaN	NaN	NaN	NaN	NaN
3.676	-72.6141	-66.622	1394.8502	-1.6114	0.94824	-0.2293	-89.955	-177.251	1415.1022	-0.67969	0.63281	-0.15869	23.391	19.3067	17.3695	0.14453	-0.1875	-0.072266	NaN	NaN	NaN	NaN	NaN	NaN
3.678	-117.1821	-76.8507	1423.8185	-1.7735	1.1095	-0.21397	-48.226	-145.787	1414.956	-0.70117	0.5957	-0.18408	28.699	58.999	19.8946	0.12988	-0.18359	-0.074707	NaN	NaN	NaN	NaN	NaN	NaN
3.68	-89.232	-79.708	1434.5053	-1.9375	1.2773	-0.19824	-42.23	-138.335	1450.452	-0.76465	0.53809	-0.23877	24.117	18.8063	42.177	0.11841	-0.17822	-0.075684	NaN	NaN	NaN	NaN	NaN	NaN
3.682	-99.589	-74.643	1430.952	-2.0821	1.4444	-0.1961	-33.303	-163.3801	1490.589	-0.823	0.51879	-0.26734	30.76	58.131	42.559	0.10693	-0.17773	-0.080078	NaN	NaN	NaN	NaN	NaN	NaN
3.684	-97.2006	-70.652	1423.0033	-2.1851	1.5793	-0.19356	-43.14	-125.4228	1474.937	-0.89209	0.52783	-0.28467	14.117	23.1829	37.6969	0.09668	-0.16846	-0.089355	NaN	NaN	NaN	NaN	NaN	NaN
3.686	-94.10324	-65.721	1433.5509	-2.2289	1.6699	-0.1959	-36.925	-156.448	1490.134	-1.0049	0.56641	-0.32031	2.64	79.82	11.248	0.087402	-0.15967	-0.09082	NaN	NaN	NaN	NaN	NaN	NaN
3.688	-92.524	-69.891	1441.9545	-2.2246	1.7137	-0.20361	26.669	-177.414	1532.951	-1.0664	0.5918	-0.33643	25.447	15.618	25.638	0.078125	-0.1543	-0.091797	NaN	NaN	NaN	NaN	NaN	NaN
3.69	-122.439	-64.5934	1419.6017	-2.1772	1.729	-0.21045	-41.202	-171.673	1533.555	-1.2119	0.67676	-0.36035	-4.406	59.864	30.6888	0.060547	-0.13672	-0.098144	NaN	NaN	NaN	NaN	NaN	NaN
3.692	-105.5312	-52.9409	1413.4656	-2.1076	1.701	-0.21455	-65.9684	-209.575	1571.96	-1.3393	0.75244	-0.38501	-39.66	15.351	49.973	0.041504	-0.12109	-0.098633	NaN	NaN	NaN	NaN	NaN	NaN
3.694	-94.9042	-39.285	1414.4127	-2.0374	1.6583	-0.22119	-50.667	-186.4315	1566.8777	-1.478	0.84229	-0.38623	-32.93	75.798	52.43	0.003418	-0.086426	-0.098145	NaN	NaN	NaN	NaN	NaN	NaN
3.696	-97.132	-24.061	1426.7157	-1.9874	1.6146	-0.22627	-84.3374	-184.3385	1589.1542	-1.6953	0.99805	-0.39063	-36.7912	22.4293	57.892	-0.012207	-0.065918	-0.099121	NaN	NaN	NaN	NaN	NaN	NaN
3.698	-90.418	-5.912	1421.59612	-1.9569	1.5884	-0.22354	-26.774	-202.2043	1631.543	-1.8105	1.0938	-0.37939	-74.9986	72.951	60.916	-0.049805	-0.025879	-0.096191	NaN	NaN	NaN	NaN	NaN	NaN
3.7	-82.801	-3.1136	1427.42293	-1.9409	1.5747	-0.21143	-31.199	-160.662	1603.208	-2.0601	1.3013	-0.354	-99.025	15.707	58.834	-0.079346	0.0039065	-0.093506	NaN	NaN	NaN	NaN	NaN	NaN
3.702	-93.0738	1.42703	1423.4318	-1.9311	1.5537	-0.19981	-49.817	-157.741	1578.2377	-2.2451	1.4522	-0.34033	-110.5995	64.1779	34.6674	-0.097168	0.03418	-0.092285	NaN	NaN	NaN	NaN	NaN	NaN
3.704	-59.873	-5.17797	1408.1329	-1.9028	1.5261	-0.18779	0.484999999999999	-125.229	1567.194	-2.4023	1.5879	-0.31152	-90.368	7.251	49.2436	-0.12305	0.065918	-0.094727	NaN	NaN	NaN	NaN	NaN	NaN
3.706	-46.061	-0.3429	1408.078	-1.8699	1.4887	-0.17842	-58.439	-75.361	1555.387	-2.5464	1.7192	-0.27002	-94.5778	41.4143	45.4763	-0.1333	0.078613	-0.092773	NaN	NaN	NaN	NaN	NaN	NaN
3.708	-45.014	16.3052	1402.111	-1.8189	1.4585	-0.16904	-55.493	-82.297	1575.603	-2.5801	1.7568	-0.25586	-97.289	-15.085	64.5647	-0.15625	0.098633	-0.094238	NaN	NaN	NaN	NaN	NaN	NaN
3.71	-40.966	21.717	1383.6539	-1.7563	1.4263	-0.1748	-51.731	-62.461	1569.59089	-2.5757	1.7896	-0.23535	-112.2625	13.3898	67.095	-0.1648	0.11206	-0.093017	NaN	NaN	NaN	NaN	NaN	NaN
3.712	-37.637	21.4375	1359.681	-1.697	1.3874	-0.17412	-86.327	-49.008	1530.353	-2.5375	1.7798	-0.23022	-88.8594	-52.93	109.5179	-0.17188	0.12256	-0.091309	NaN	NaN	NaN	NaN	NaN	NaN
3.714	-48.65	-1.91151	1339.4055	-1.6394	1.3478	-0.17422	-67.325	-60.538	1533.71	-2.4839	1.7661	-0.23047	-87.3578	0.8048	159.4377	-0.17969	0.1333	-0.1001	NaN	NaN	NaN	NaN	NaN	NaN
3.716	-48.099	-10.4094	1347.9629	-1.5929	1.3145	-0.17266	-97.708	-0.390999999999998	1527.83	-2.3999	1.7505	-0.23096	-49.6839	-7.577	254.0735	-0.18066	0.13477	-0.10303	NaN	NaN	NaN	NaN	NaN	NaN
3.718	-48.898	-0.579000000000001	1337.168	-1.555	1.2841	-0.16914	-137.1	2.322	1551.77	-2.3706	1.7407	-0.2251	-60.327	58.7745	366.765	-0.18652	0.13867	-0.11816	NaN	NaN	NaN	NaN	NaN	NaN
3.72	-65.264	12.228	1322.0626	-1.5273	1.2559	-0.16553	-105.2069	-0.692	1566.4592	-2.3257	1.7427	-0.22266	-29.187	18.209	473.761	-0.19311	0.14185	-0.12818	NaN	NaN	NaN	NaN	NaN	NaN
3.722	-56.987	37.47151	1289.9455	-1.5098	1.2308	-0.16152	-131.844	1.728	1530.222	-2.2691	1.747	-0.20239	14.141	32.9533	608.536	-0.21338	0.146	-0.13623	NaN	NaN	NaN	NaN	NaN	NaN
3.724	-70.177	42.533	1284.5386	-1.4925	1.2074	-0.15761	-134.343	-66.872	1542.2277	-2.1953	1.7344	-0.18652	88.899	9.4952	785.208	-0.27344	0.16113	-0.14697	NaN	NaN	NaN	NaN	NaN	NaN
3.726	-65.699	44.888	1267.6899	-1.4789	1.1828	-0.14981	-93.731	-64.748	1553.04396	-2.0913	1.6685	-0.18213	81.541	47.243	1009.613	-0.31396	0.16895	-0.15332	NaN	NaN	NaN	NaN	NaN	NaN
3.728	-61.781	57.7648	1248.2271	-1.4695	1.1613	-0.14434	-123.2897	-19.878	1536.1123	-2.0327	1.6274	-0.18262	75.83	18.241	1189.8595	-0.43652	0.19482	-0.16504	NaN	NaN	NaN	NaN	NaN	NaN
3.73	-70.708	60.2676	1243.57323	-1.459	1.1445	-0.14209	-78.21	-21.398	1528.753	-1.9194	1.5396	-0.18262	54.5226	35.148	1313.802	-0.55566	0.22094	-0.16699	NaN	NaN	NaN	NaN	NaN	NaN
3.732	-96.5729	63.5317	1226.504	-1.4477	1.1277	-0.13809	-82.102	24.645	1496.9942	-1.8489	1.4826	-0.19214	10.31	0.481000000000002	1398.895	-0.7085	0.26318	-0.16553	NaN	NaN	NaN	NaN	NaN	NaN
3.734	-79.805	67.3845	1202.0176	-1.4366	1.1114	-0.13877	-108.9585	14.899	1490.89017	-1.791	1.4199	-0.20166	-36.92	-37.652	1457.494	-0.97852	0.3457	-0.17383	NaN	NaN	NaN	NaN	NaN	NaN
3.736	-86.10134	77.2468	1180.2543	-1.4273	1.0958	-0.13408	-60.144	14.2553	1482.1446	-1.73	1.3521	-0.20557	-58.707	-61.16748	1483.987	-1.1343	0.39697	-0.18213	NaN	NaN	NaN	NaN	NaN	NaN
3.738	-85.734	79.0805	1158.8593	-1.4105	1.0806	-0.13487	-103.435	84.111	1445.6988	-1.6931	1.3108	-0.20996	-85.95	-76.018	1467.987	-1.48	0.51807	-0.18018	NaN	NaN	NaN	NaN	NaN	NaN
3.74	-84.7948	84.77998	1132.7252	-1.394	1.0591	-0.14307	-79.921	93.601	1459.04	-1.6631	1.2754	-0.21582	-115.211	-102.357	1425.08	-1.7481	0.63843	-0.17236	NaN	NaN	NaN	NaN	NaN	NaN
3.742	-88.2861	92.2433	1117.0231	-1.3757	1.0392	-0.13633	-59.858	131.051	1455.686	-1.6338	1.2324	-0.22461	-146.026	-173.207	1420.878	-2.0117	0.77344	-0.14014	NaN	NaN	NaN	NaN	NaN	NaN
3.744	-95.017	96.8775	1092.111	-1.3528	1.0164	-0.14082	-109.075	143.155	1415.9817	-1.6172	1.2168	-0.22656	-164.436	-186.825	1359.355	-2.3535	1.0156	-0.081055	NaN	NaN	NaN	NaN	NaN	NaN
3.746	-66.0614	87.6351	1099.55846	-1.3324	0.98829	-0.14199	-78.7788	107.188	1384.1056	-1.5854	1.1802	-0.2334	-165.049	-214.367	1317.458	-2.5269	1.1567	-0.049805	NaN	NaN	NaN	NaN	NaN	NaN
3.748	-45.074	94.6614	1089.7052	-1.3031	0.95898	-0.14219	-54.132	142.167	1350.8344	-1.5613	1.1477	-0.23365	-160.638	-150.901	1253.955	-2.8628	1.4692	-0.019531	NaN	NaN	NaN	NaN	NaN	NaN
3.75	-43.981	95.413	1060.03099	-1.2778	0.93408	-0.14014	-47.787	141.0231	1329.3142	-1.5386	1.1235	-0.23291	-171.656	-154.025	1245.943	-3.0552	1.6831	-0.02417	NaN	NaN	NaN	NaN	NaN	NaN
3.752	-31.18	116.48509	1036.32004	-1.2511	0.90342	-0.14209	-0.489000000000004	128.8955	1349.9729	-1.5098	1.0957	-0.22803	-207.392	-65.378	1242.516	-3.1597	1.8403	-0.061523	NaN	NaN	NaN	NaN	NaN	NaN
3.754	-32.617	110.9189	1019.8876	-1.2277	0.8794	-0.14121	-33.506	177.647	1320.8678	-1.4961	1.084	-0.22656	-241.641	-75.51	1229.507	-3.0703	1.8789	-0.17578	NaN	NaN	NaN	NaN	NaN	NaN
3.756	-35.208	124.14	1003.565	-1.2061	0.86338	-0.14394	-6.893	133.803	1295.1645	-1.4663	1.063	-0.22314	-250.68	-67.395	1203.286	-2.918	1.834	-0.2417	NaN	NaN	NaN	NaN	NaN	NaN
3.758	-5.82	130.512	965.8545	-1.1891	0.84101	-0.14336	11.093	120.0064	1288.934	-1.448	1.0515	-0.22339	-229.963	-134.76	1247.85	-2.4531	1.6074	-0.3623	NaN	NaN	NaN	NaN	NaN	NaN
3.76	-0.829000000000001	121.3394	940.1515	-1.166	0.82031	-0.14111	-27.175	131.059	1262.162	-1.4219	1.0371	-0.22314	-216.443	-111.712	1299.5586	-2.0612	1.3377	-0.44067	NaN	NaN	NaN	NaN	NaN	NaN
3.762	-7.932	115.383888	922.5635	-1.146	0.80752	-0.13692	-31.849	98.806	1263.002	-1.3828	1.0137	-0.22559	-237.811	-168.625	1299.6186	-1.7065	1.0581	-0.50342	NaN	NaN	NaN	NaN	NaN	NaN
3.764	-13.108	113.7626	900.0072	-1.1202	0.78955	-0.13476	-26.628	180.2259	1218.2563	-1.3633	1.002	-0.22217	-249.905	-138.692	1291.66	-1.3569	0.7583	-0.5708	NaN	NaN	NaN	NaN	NaN	NaN
3.766	-5.069	131.5244	862.366	-1.0964	0.76572	-0.13555	-66.5022	177.0532	1154.767	-1.3198	0.98096	-0.2124	-177.883	-237.0859	1331.812	-1.2515	0.65088	-0.5835	NaN	NaN	NaN	NaN	NaN	NaN
3.768	18.576	130.27755	844.7429	-1.0653	0.74248	-0.13213	-30.091	162.9839	1136.063	-1.2893	0.95239	-0.20654	-161.305	-279.916	1394.67292	-1.1299	0.52539	-0.604	NaN	NaN	NaN	NaN	NaN	NaN
3.77	16.884	136.0029	838.0234	-1.0298	0.72217	-0.1333	-55.234	203.0508	1116.6117	-1.2539	0.92188	-0.20117	-97.1563	-378.299	1436.787	-1.085	0.48877	-0.62793	NaN	NaN	NaN	NaN	NaN	NaN
3.772	22.197	131.5587	823.4722	-0.99882	0.69434	-0.13027	-45.7847	159.085	1115.515	-1.2144	0.87939	-0.1958	-77.217	-375.635	1459.47047	-1.0234	0.46826	-0.63086	NaN	NaN	NaN	NaN	NaN	NaN
3.774	2.062	134.646	777.209	-0.96348	0.66875	-0.12998	-19.357	199.7568	1095.1939	-1.1855	0.85156	-0.19238	-39.423	-389.91	1482.686	-0.91553	0.43896	-0.60986	NaN	NaN	NaN	NaN	NaN	NaN
3.776	-6.40000000000001	137.405	768.5572	-0.93067	0.64375	-0.12685	-44.719	233.83138	1025.796	-1.144	0.81104	-0.18799	-41.585	-317.121	1524.298	-0.85889	0.43213	-0.59033	NaN	NaN	NaN	NaN	NaN	NaN
3.778	-12.753	146.8692	761.4045	-0.89609	0.61484	-0.12402	-30.315	181.0627	1009.6619	-1.1138	0.77344	-0.18408	5.056	-295.532	1566.0708	-0.76465	0.4209	-0.55762	NaN	NaN	NaN	NaN	NaN	NaN
3.78	-5.91	147.2129	725.091	-0.86475	0.58838	-0.12256	-30.718	243.751	978.505	-1.0791	0.73926	-0.18262	44.203	-220.7688	1591.19	-0.73437	0.41651	-0.53076	NaN	NaN	NaN	NaN	NaN	NaN
3.782	-35.6692	137.4466	681.4607	-0.83779	0.56143	-0.11953	-43.905	212.713	918.531	-1.0366	0.69678	-0.17041	86.4928	-229.575	1619.612	-0.74805	0.42773	-0.50391	NaN	NaN	NaN	NaN	NaN	NaN
3.784	-56.6456	126.5417	653.087	-0.8083	0.53389	-0.11533	-16.041	191.8196	900.396	-1.0171	0.67529	-0.16602	73.347	-181.25	1647.002	-0.84717	0.48584	-0.46631	NaN	NaN	NaN	NaN	NaN	NaN
3.786	-54.2156	127.8474	629.801	-0.78135	0.50928	-0.11533	-45.8019	234.671	861.326	-0.98438	0.63477	-0.15967	53.511	-176.423	1675.3975	-0.93408	0.54541	-0.45654	NaN	NaN	NaN	NaN	NaN	NaN
3.788	-43.3284	142.9415	607.57317	-0.75498	0.48389	-0.11221	-59.445	168.9479	862.7058	-0.95923	0.61059	-0.15479	51.569	-106.469	1685.485	-1.1514	0.67773	-0.43555	NaN	NaN	NaN	NaN	NaN	NaN
3.79	-51.3273	143.8658	578.21806	-0.72803	0.46045	-0.11572	-24.803	207.193	863.10054	-0.92969	0.58008	-0.15234	88.1927	-82.315	1679.64	-1.3262	0.79346	-0.43994	NaN	NaN	NaN	NaN	NaN	NaN
3.792	-61.712	133.092	559.1352	-0.70459	0.43506	-0.11182	-25.9173	235.524	802.1884	-0.89404	0.54932	-0.14404	65.32	-66.875	1684.782	-1.4858	0.90283	-0.44238	NaN	NaN	NaN	NaN	NaN	NaN
3.794	-39.4633	127.4733	538.4809	-0.67773	0.41191	-0.10947	6.372	160.9444	785.474	-0.87646	0.53076	-0.14355	51.216	-89.9	1679.958	-1.6655	1.0435	-0.44287	NaN	NaN	NaN	NaN	NaN	NaN
3.796	-47.8023	128.8048	511.258	-0.65	0.38731	-0.10635	7.471	213.9773	748.382	-0.84473	0.49316	-0.1377	20.881	-97.8275	1722.418	-1.7417	1.1138	-0.45361	NaN	NaN	NaN	NaN	NaN	NaN
3.798	-49.95269	135.9479	487.0864	-0.6209	0.3666	-0.10498	-15.8388	184.707	692.5345	-0.81201	0.46777	-0.12988	17.812	-94.863	1742.7806	-1.8882	1.2446	-0.49561	NaN	NaN	NaN	NaN	NaN	NaN
3.8	-46.216	137.3247	475.1769	-0.59229	0.34521	-0.10547	28.61	183.73	663.217	-0.77881	0.43799	-0.12549	-37.6201	-88.8833	1796.421	-2.0014	1.3501	-0.54638	NaN	NaN	NaN	NaN	NaN	NaN
3.802	-39.759	142.393	444.9992	-0.56094	0.32871	-0.10664	30.0069	242.7683	604.919	-0.73242	0.39844	-0.12451	-58.019	-80.823	1840.765	-2.1094	1.4453	-0.59375	NaN	NaN	NaN	NaN	NaN	NaN
3.804	-48.304	135.129	408.1897	-0.53135	0.30722	-0.10752	25.3251	167.943	587.0184	-0.70117	0.38037	-0.12402	-74.0085	-98.287	1863.547	-2.2832	1.5645	-0.64551	NaN	NaN	NaN	NaN	NaN	NaN
3.806	-49.9277	128.655	376.8554	-0.49659	0.29394	-0.10634	21.148	182.0609	566.7833	-0.63721	0.33936	-0.12256	-80.5105	-90.499	1854.919	-2.3784	1.6157	-0.66699	NaN	NaN	NaN	NaN	NaN	NaN
3.808	-33.911	121.924	365.1013	-0.46211	0.27256	-0.1083	4.454	213.108	495.262	-0.59595	0.30884	-0.12475	-94.053	-89.148	1851.89486	-2.605	1.7192	-0.68701	NaN	NaN	NaN	NaN	NaN	NaN
3.81	-14.027	118.4614	359.60464	-0.4248	0.25684	-0.10889	-0.536000000000001	182.697	476.7093	-0.54736	0.27686	-0.12305	-122.876	-22.596	1844.4106	-2.7684	1.7903	-0.69092	NaN	NaN	NaN	NaN	NaN	NaN
3.812	-11.773	110.1882	326.8586	-0.39356	0.23603	-0.11035	-5.088	259.12	446.4503	-0.48877	0.24023	-0.12305	-111.731	13.759	1847.61	-2.9253	1.8638	-0.68701	NaN	NaN	NaN	NaN	NaN	NaN
3.814	1.829	88.269	313.12802	-0.35645	0.21924	-0.11416	2.968	207.664	426.531	-0.45801	0.21924	-0.12354	-121.573	74.961	1829.8756	-3.103	1.9517	-0.66113	NaN	NaN	NaN	NaN	NaN	NaN
3.816	9.353	85.4149	293.0053	-0.3209	0.20284	-0.11807	4.157	167.391	402.60292	-0.39795	0.18311	-0.11963	-125.652	64.674	1802.235	-3.1636	2.0063	-0.64404	NaN	NaN	NaN	NaN	NaN	NaN
3.818	-0.171999999999997	86.3483	271.9355	-0.28565	0.18428	-0.11416	-11.511	215.867	328.832	-0.35669	0.15698	-0.12036	-104.728	101.687	1769.01	-3.2461	2.0977	-0.63086	NaN	NaN	NaN	NaN	NaN	NaN
3.82	-0.150000000000006	95.429	237.5543	-0.25244	0.16211	-0.11279	-11.81	139.01	309.711	-0.31396	0.1333	-0.11865	-87.536	60.957	1765.3848	-3.2392	2.1592	-0.63281	NaN	NaN	NaN	NaN	NaN	NaN
3.822	14.006	87.699	230.9781	-0.22207	0.14834	-0.1169	3.1	162.668	310.1214	-0.26367	0.099609	-0.11035	-76.463	119.4651	1759.4747	-3.1836	2.2031	-0.63086	NaN	NaN	NaN	NaN	NaN	NaN
3.824	-1.55	89.387	237.4846	-0.18809	0.13203	-0.11504	-19.661	173.5271	269.7846	-0.23975	0.085449	-0.11377	-68.621	102.9509	1759.0563	-3.0171	2.2173	-0.61475	NaN	NaN	NaN	NaN	NaN	NaN
3.826	-1.649	84.26	207.3641	-0.15957	0.1168	-0.11308	-28.035	110.657	255.659	-0.19043	0.058105	-0.11133	-54.06435	164.834	1733.775	-2.9019	2.1958	-0.60693	NaN	NaN	NaN	NaN	NaN	NaN
3.828	-27.891	72.6506	194.3031	-0.1332	0.10185	-0.11191	-22.969	179.109	224.1866	-0.16113	0.039795	-0.10766	-26.888	119.022	1736.175	-2.6382	2.0552	-0.57275	NaN	NaN	NaN	NaN	NaN	NaN
3.83	-19.275	72.3833	179.42688	-0.10498	0.090332	-0.1123	-42.1276	139.9761	199.5689	-0.13232	0.021484	-0.10742	19.207	156.41	1737.19	-2.3999	1.8481	-0.57764	NaN	NaN	NaN	NaN	NaN	NaN
3.832	-19.369	70.73181	176.7234	-0.084668	0.07666	-0.10752	-34.324	109.8492	213.944	-0.104	0.0039063	-0.104	39.678	101.2132	1733.138	-2.2949	1.7402	-0.5791	NaN	NaN	NaN	NaN	NaN	NaN
3.834	-15.64	83.5495	151.076	-0.061426	0.0625	-0.10996	-59.1908	154.827	177.103	-0.098145	-0.0058594	-0.1001	51.966	158.684	1723.526	-2.1011	1.5513	-0.57275	NaN	NaN	NaN	NaN	NaN	NaN
3.836	-36.415	72.6348	135.8336	-0.03877	0.053125	-0.10605	-61.2131	78.9534	163.127	-0.080078	-0.027832	-0.098633	48.7194	105.491	1714.633	-1.987	1.4436	-0.57397	NaN	NaN	NaN	NaN	NaN	NaN
3.838	-41.02	56.4369	121.22828	-0.01582	0.041504	-0.10449	-39.1046	107.265	159.6497	-0.077149	-0.036377	-0.098144	31.6641	128.2498	1715.586	-1.9004	1.3594	-0.56836	NaN	NaN	NaN	NaN	NaN	NaN
3.84	-24.01	52.3795	126.734	0.0024414	0.03418	-0.10254	-50.426	108.360053	123.343	-0.075195	-0.041504	-0.098145	93.752	50.991	1700.293	-1.813	1.2817	-0.54443	NaN	NaN	NaN	NaN	NaN	NaN
3.842	-45.488	59.6445	120.64946	0.02168	0.016015	-0.094824	-27.114	47.776	114.1524	-0.078125	-0.047363	-0.090332	84.2492	126.453	1626.897	-1.7832	1.2598	-0.53516	NaN	NaN	NaN	NaN	NaN	NaN
3.844	-58.03031	61.614	115.0457	0.04082	0.006543	-0.096973	-8.918	118.6358	97.37141	-0.077637	-0.045898	-0.087402	81.081	100.883	1571.174	-1.7422	1.2402	-0.51758	NaN	NaN	NaN	NaN	NaN	NaN
3.846	-62.361628	53.5137	104.7081	0.057227	-0.0040039	-0.096582	-34.8775	95.051	78.882	-0.084961	-0.050293	-0.087402	36.214	200.63386	1516.526	-1.7138	1.2324	-0.50537	NaN	NaN	NaN	NaN	NaN	NaN
3.848	-60.27	44.752	102.728	0.074414	-0.016211	-0.097559	-23.597	69.336	86.673	-0.090088	-0.048096	-0.087647	11.637	186.4416	1495.894	-1.6792	1.2251	-0.49561	NaN	NaN	NaN	NaN	NaN	NaN
3.85	-64.0231	53.4835	84.9913	0.090332	-0.026855	-0.097656	-18.086	98.479	70.5396	-0.09375	-0.046387	-0.086426	-23.995	273.536	1454.223	-1.6343	1.2134	-0.48291	NaN	NaN	NaN	NaN	NaN	NaN
3.852	-58.2775	51.866	89.9724	0.10137	-0.037403	-0.096778	-9.478	16.1584	66.1088	-0.098145	-0.042969	-0.086426	-1.839	211.4555	1424.4793	-1.6074	1.2051	-0.47607	NaN	NaN	NaN	NaN	NaN	NaN
3.854	-53.7542	47.3094	93.2	0.10743	-0.043066	-0.10195	-6.15	42.7293	72.8828	-0.096191	-0.040039	-0.091797	-27.993	263.869	1398.13866	-1.543	1.168	-0.4541	NaN	NaN	NaN	NaN	NaN	NaN
3.856	-44.6994	49.0911	74.3926	0.11797	-0.051269	-0.096486	1.803	54.7477	37.732	-0.087891	-0.037109	-0.092773	-82.9023	219.7969	1370.901	-1.4829	1.1352	-0.43921	NaN	NaN	NaN	NaN	NaN	NaN
3.858	-50.055	50.526	67.5079	0.12236	-0.056836	-0.09248	-7.497	-8.3738	51.2384	-0.086914	-0.039307	-0.086914	-135.3924	298.549	1320.7137	-1.4272	1.0962	-0.41699	NaN	NaN	NaN	NaN	NaN	NaN
3.86	-45.6	38.6806	65.8085	0.12109	-0.062012	-0.089355	-21.093	60.1108	40.8004	-0.085449	-0.040527	-0.095703	-161.459	269.787	1277.7134	-1.3613	1.0293	-0.38721	NaN	NaN	NaN	NaN	NaN	NaN
3.862	-8.11	41.2921	64.1303	0.11436	-0.06582	-0.086426	-18.589	12.64828	28.7432	-0.07959	-0.044434	-0.09668	-163.06	319.588	1221.121	-1.3247	0.99561	-0.37207	NaN	NaN	NaN	NaN	NaN	NaN
3.864	-9.625	42.7005	54.6063	0.10615	-0.069336	-0.084473	1.266	-5.3967	44.5211	-0.080566	-0.045898	-0.092285	-144.092	240.2679	1188.638	-1.2671	0.94189	-0.33838	NaN	NaN	NaN	NaN	NaN	NaN
3.866	-23.386	42.1413	56.2805	0.093262	-0.067773	-0.070411	12.921	48.403	33.97774	-0.068848	-0.047363	-0.099609	-169.195	273.343	1141.528	-1.2244	0.90014	-0.31568	NaN	NaN	NaN	NaN	NaN	NaN
3.868	-8.438	31.3521	49.767	0.07959	-0.070801	-0.069239	2.379	-14.9746	40.1518	-0.069824	-0.050781	-0.098145	-155.432	217.667	1104.813	-1.1675	0.86377	-0.29346	NaN	NaN	NaN	NaN	NaN	NaN
3.87	-17.992	39.9757	50.6888	0.063965	-0.070313	-0.063965	-13.796	9.308	33.8143	-0.06543	-0.055176	-0.093262	-203.693	274.8071	1063.801	-1.0835	0.8208	-0.26709	NaN	NaN	NaN	NaN	NaN	NaN
3.872	-6.48800000000001	44.0224	35.1795	0.043164	-0.061719	-0.060254	-37.826	26.5313	-3.265	-0.056152	-0.059082	-0.089355	-211.125	242.818	1029.936	-1.0449	0.80176	-0.25	NaN	NaN	NaN	NaN	NaN	NaN
3.874	-27.786	40.5873	34.7659	0.02959	-0.058496	-0.052929	-29.537	-22.3172	-0.146000000000001	-0.05127	-0.065918	-0.086426	-216.196	289.438	964.0834	-0.95068	0.75732	-0.21973	NaN	NaN	NaN	NaN	NaN	NaN
3.876	3.94	28.925	45.5062	0.014355	-0.049512	-0.04707	-4.415	49.7	7.376	-0.035645	-0.078125	-0.080566	-155.8689	256.45	947.508	-0.87598	0.72119	-0.19458	NaN	NaN	NaN	NaN	NaN	NaN
3.878	-11.461	33.5719	52.0048	0.0008789	-0.043262	-0.041309	-40.56	17.0289	15.398	-0.029785	-0.085205	-0.072754	-119.545	311.1929	897.7595	-0.80371	0.67188	-0.1709	NaN	NaN	NaN	NaN	NaN	NaN
3.88	-3.746	41.944	35.8348	-0.010254	-0.035645	-0.035156	-45.352	9.2031	40.7619	-0.01416	-0.094238	-0.067383	-140.4673	304.279	853.6833	-0.70801	0.58789	-0.1416	NaN	NaN	NaN	NaN	NaN	NaN
3.882	-21.303	36.147	31.713	-0.024903	-0.027246	-0.028223	-46.6662	64.582	18.8794	0.0014648	-0.10498	-0.056641	-110.755	344.327	814.8451	-0.65967	0.55322	-0.12549	NaN	NaN	NaN	NaN	NaN	NaN
3.884	-23.399	26.8993	40.274336	-0.033984	-0.018945	-0.024902	-63.432	6.88944	21.5084	0.015381	-0.11548	-0.051758	-78.708	315.545	773.8258	-0.57031	0.46387	-0.10205	NaN	NaN	NaN	NaN	NaN	NaN
3.886	-9.88	30.23618	37.5926	-0.043359	-0.017383	-0.016699	-48.3991	25.3129	40.305	0.028809	-0.12549	-0.044922	-63.659	324.788	737.197	-0.51367	0.39844	-0.088379	NaN	NaN	NaN	NaN	NaN	NaN
3.888	-39.678	31.24639	29.7314	-0.0542	-0.016406	-0.016504	-60.2773	44.196	13.384	0.051758	-0.1377	-0.035156	-24.43	271.348	675.8715	-0.46094	0.34521	-0.078125	NaN	NaN	NaN	NaN	NaN	NaN
3.89	-46.0529	35.5682	17.6706	-0.057129	-0.019043	-0.011719	-54.587	-14.3923	13.15	0.065918	-0.14355	-0.026367	-4.96300000000001	253.587	623.8781	-0.38428	0.27197	-0.057129	NaN	NaN	NaN	NaN	NaN	NaN
3.892	-49.619	25.9166	36.81222	-0.064844	-0.019629	-0.0064453	-35.78	54.304	1.191	0.088379	-0.1582	-0.013672	-18.401	216.886	599.347	-0.34619	0.2373	-0.048828	NaN	NaN	NaN	NaN	NaN	NaN
3.894	-35.009	29.8329	45.947	-0.070508	-0.016504	-0.0032227	-55.0684	15.8225	6.4592	0.10352	-0.16724	-0.016602	-12.549	240.62034	548.613	-0.27734	0.16748	-0.027832	NaN	NaN	NaN	NaN	NaN	NaN
3.896	-59.974	26.60736	34.2408	-0.074804	-0.02002	-0.0016601	-53.562	-1.783	44.389	0.12158	-0.18115	-0.015137	-8.779	228.5046	487.8043	-0.22217	0.12426	-0.015869	NaN	NaN	NaN	NaN	NaN	NaN
3.898	-65.98854	25.9854	28.0309	-0.07666	-0.01709	-0.0013672	-35.432	53.9358	17.8628	0.14209	-0.19678	-0.0039063	-6.948	232.622	438.225	-0.16992	0.087402	-0.0058594	NaN	NaN	NaN	NaN	NaN	NaN
3.9	-57.69	18.5198	39.2224	-0.07959	-0.017578	-0.00097656	-34.348	8.6188	13.3051	0.15039	-0.20313	0	-0.372999999999998	198.2905	404.4897	-0.11328	0.046875	0.0078125	NaN	NaN	NaN	NaN	NaN	NaN
3.902	-77.1041	29.2546	37.8731	-0.076465	-0.019531	-0.0048829	-18.362	40.402	36.0602	0.1665	-0.21729	0.0039063	16.339	184.404	380.025	-0.083008	0.029297	0.015625	NaN	NaN	NaN	NaN	NaN	NaN
3.904	-57.9039	25.45547	41.05617	-0.075976	-0.016309	-0.0032227	-16.418	62.488	31.74072	0.18164	-0.23218	0.0097658	12.682	177.652	359.9365	-0.025879	-0.0097656	0.030273	NaN	NaN	NaN	NaN	NaN	NaN
3.906	-46.008	23.7196	27.74813	-0.07207	-0.020605	-0.0079102	-38.428	10.7427	38.61	0.18896	-0.24219	0.012695	-0.0779999999999959	190.34	321.859	0.0024416	-0.037109	0.042968	NaN	NaN	NaN	NaN	NaN	NaN
3.908	-43.954	34.3335	30.1057	-0.060449	-0.016015	-0.011328	-14.381	64.206	20.4883	0.2041	-0.25781	0.021484	-35.265	180.622	273.781	0.022461	-0.055176	0.049316	NaN	NaN	NaN	NaN	NaN	NaN
3.91	-45.357	34.1435	21.6299	-0.049316	-0.019043	-0.015625	-2.562	24.242	7.2405	0.20752	-0.26416	0.024902	-64.751	150.541	246.178	0.041504	-0.080078	0.05127	NaN	NaN	NaN	NaN	NaN	NaN
3.912	-54.7371	25.793	24.7879	-0.042969	-0.017676	-0.02002	-16.308	-0.468900000000001	30.3219	0.20996	-0.27246	0.024902	-84.122	151.099	184.7946	0.045898	-0.087891	0.055176	NaN	NaN	NaN	NaN	NaN	NaN
3.914	-27.178	25.6365	37.7963	-0.029004	-0.017871	-0.025391	-14.128	61.614	28.1964	0.21118	-0.2793	0.023438	-83.43	150.263	141.926	0.044922	-0.097656	0.057617	NaN	NaN	NaN	NaN	NaN	NaN
3.916	-36.746	41.239	37.6464	-0.02041	-0.019824	-0.028515	1.83600000000001	9.586	22.4507	0.20801	-0.28418	0.018555	-89.8998	157.43	87.607	0.02295	-0.097412	0.065673	NaN	NaN	NaN	NaN	NaN	NaN
3.918	-15.408	35.5167	51.2201	-0.012305	-0.021094	-0.041504	15.718	30.8036	36.0367	0.20605	-0.28125	0.029297	-116.907	131.0261	76.657	-0.0039063	-0.093262	0.066406	NaN	NaN	NaN	NaN	NaN	NaN
3.92	-38.296	14.3523	65.6319	-0.0048828	-0.020508	-0.050293	-13.313	44.0167	26.9008	0.19775	-0.28076	0.029785	-157.95	118.8229	66.981	-0.055176	-0.08252	0.083496	NaN	NaN	NaN	NaN	NaN	NaN
3.922	-5.567	-15.3854	75.5968	0.003711	-0.022168	-0.054395	-32.887	-0.498799999999999	45.045	0.17773	-0.27344	0.02002	-126.96	85.518	62.251	-0.07959	-0.074707	0.091309	NaN	NaN	NaN	NaN	NaN	NaN
3.924	-22.337	1.404	84.8226	0.007422	-0.025683	-0.062891	-7.556	48.89	44.8175	0.17017	-0.2627	0.019776	-113.4276	76.4996	28.011	-0.14111	-0.05127	0.10205	NaN	NaN	NaN	NaN	NaN	NaN
3.926	9.693	3.694	96.8235	0.014844	-0.024903	-0.06914	0.616999999999997	19.086	18.7995	0.1582	-0.25928	0.0087891	-98.7132	57.5302	41.3534	-0.1897	-0.036376	0.11279	NaN	NaN	NaN	NaN	NaN	NaN
3.928	-8.819	13.35932	147.1859	0.017285	-0.022852	-0.080078	-28.443	-1.7134	41.3432	0.15039	-0.24707	0.0083008	-121.5328	67.723	24.6269	-0.23633	-0.01123	0.12451	NaN	NaN	NaN	NaN	NaN	NaN
3.93	12.32	18.588	203.1535	0.019531	-0.016113	-0.084473	-35.576	50.47	39.1684	0.1416	-0.25	-0.00097656	-94.6644	58.9297	45.7628	-0.29297	0.021973	0.13721	NaN	NaN	NaN	NaN	NaN	NaN
3.932	32.5163	9.104	230.893	0.028515	-0.011816	-0.091504	-49.9248	-11.9639	34.9991	0.12598	-0.24121	-0.0087891	-96.6734	94.253	15.169	-0.31787	0.030762	0.14355	NaN	NaN	NaN	NaN	NaN	NaN
3.934	43.67	0.829126	276.907	0.033887	-0.0063476	-0.10137	-34.739	14.777	47.6134	0.12036	-0.23267	-0.016357	-72.222	61.94422	34.7386	-0.37646	0.056152	0.15527	NaN	NaN	NaN	NaN	NaN	NaN
3.936	66.139	12.5667	382.4175	0.036231	-0.0047851	-0.11075	-41.1191	36.0854	19.3409	0.11279	-0.22412	-0.020996	-39.878	53.913	32.0988	-0.41284	0.070801	0.15479	NaN	NaN	NaN	NaN	NaN	NaN
3.938	66.146	30.0386	479.1846	0.039746	-0.0040039	-0.12549	-66.242	-6.6402	28.466	0.1001	-0.20996	-0.02832	-5.74	3.284	56.2925	-0.44141	0.081055	0.16016	NaN	NaN	NaN	NaN	NaN	NaN
3.94	49.398	40.3318	555.956	0.033691	-8.8819e-14	-0.13574	-29.136	49.215	44.002	0.09375	-0.20361	-0.033691	13.911	25.775	45.1233	-0.47656	0.088379	0.15332	NaN	NaN	NaN	NaN	NaN	NaN
3.942	10.3797	32.452	603.8378	0.025684	-0.0027344	-0.14756	-63.5133	22.66431	17.712	0.08252	-0.19189	-0.053223	26.039	11.992	45.0792	-0.49609	0.088867	0.15186	NaN	NaN	NaN	NaN	NaN	NaN
3.944	-3.12	27.29	656.033	0.0043946	0.010449	-0.15859	-41.948	-3.522	27.857	0.074219	-0.18457	-0.061768	-0.502000000000002	42.545	40.552	-0.52295	0.104	0.14697	NaN	NaN	NaN	NaN	NaN	NaN
3.946	4.514	11.8953	735.4336	-0.026856	0.018262	-0.16719	-46.169	35.0387	32.0258	0.065918	-0.17676	-0.078613	27.902	23.7227	77.661	-0.5437	0.11938	0.1521	NaN	NaN	NaN	NaN	NaN	NaN
3.948	-57.214	10.7799	815.159	-0.077928	0.034278	-0.17813	-71.3148	-17.6171	40.6039	0.067383	-0.16699	-0.09375	54.833	48.294	64.264	-0.55859	0.1333	0.15234	NaN	NaN	NaN	NaN	NaN	NaN
3.95	-80.696	-0.709199999999999	862.781	-0.14014	0.057129	-0.18994	-34.808	11.7035	62.1897	0.066406	-0.15869	-0.10645	55.84203	33.3759	51.0391	-0.5708	0.15186	0.15918	NaN	NaN	NaN	NaN	NaN	NaN
3.952	-85.407	-11.6035	910.942	-0.21406	0.080957	-0.2083	-16.9252	1.8288	46.785	0.068848	-0.14893	-0.12012	56.575	58.017	35.171	-0.57178	0.15967	0.1582	NaN	NaN	NaN	NaN	NaN	NaN
3.954	-114.772	-25.429	949.1037	-0.30196	0.11367	-0.22588	-47.8782	-74.8698	70.645	0.06958	-0.13575	-0.13208	26.494	34.575	61.5225	-0.56592	0.16797	0.1665	NaN	NaN	NaN	NaN	NaN	NaN
3.956	-140.5115	-34.023	964.8911	-0.40312	0.14922	-0.24189	-33.898	-28.251	102.4596	0.064941	-0.12158	-0.14404	16.123	47.653	60.2388	-0.55127	0.16797	0.16895	NaN	NaN	NaN	NaN	NaN	NaN
3.958	-119.725	-51.413	996.071	-0.51904	0.19522	-0.25049	0.881	-42.495	118.2609	0.055176	-0.097656	-0.16064	6.834	25.94302	52.68	-0.5332	0.16309	0.17041	NaN	NaN	NaN	NaN	NaN	NaN
3.96	-85.778	-49.619	1010.748	-0.65137	0.26074	-0.25977	0.589999999999996	-53.2399	182.0669	0.050293	-0.084473	-0.16748	23.268	22.2431	26.304	-0.48584	0.14453	0.16797	NaN	NaN	NaN	NaN	NaN	NaN
3.962	-118.9483	-38.5176	1029.017	-0.80254	0.34434	-0.26406	4.997	-4.469	257.129	0.018555	-0.050293	-0.17285	-9.277	-5.031	49.351	-0.45947	0.13037	0.17041	NaN	NaN	NaN	NaN	NaN	NaN
3.964	-111.154	-31.7481	1039.111	-0.97148	0.44941	-0.26221	-0.690999999999999	-29.5796	350.823	-0.017334	-0.022217	-0.17066	-21.502	-3.5899	46.4725	-0.38965	0.09375	0.16553	NaN	NaN	NaN	NaN	NaN	NaN
3.966	-140.392	-36.3793	1038.8341	-1.1637	0.56348	-0.25479	27.6311	31.9497	536.803	-0.067383	0.0053711	-0.16992	-57.9419261	-2.5093	47.5007	-0.3352	0.058593	0.16284	NaN	NaN	NaN	NaN	NaN	NaN
3.968	-107.146	-17.2553	1024.9045	-1.3685	0.69463	-0.25059	68.25	78.3968	668.252	-0.1582	0.045898	-0.17383	-79.2572	15.71	1.476	-0.28027	0.024902	0.16309	NaN	NaN	NaN	NaN	NaN	NaN
3.97	-122.55	-17.7669	1011.3454	-1.5879	0.83691	-0.23438	39.976	24.5388	793.501	-0.20996	0.066895	-0.17285	-95.261	-21.253	11.55	-0.20117	-0.015137	0.17041	NaN	NaN	NaN	NaN	NaN	NaN
3.972	-123.952	-18.103	993.6997	-1.8033	0.98299	-0.21484	69.215	50.212	920.998	-0.32715	0.11426	-0.18018	-101.9076	-18.72	15.926	-0.16602	-0.038574	0.16699	NaN	NaN	NaN	NaN	NaN	NaN
3.974	-158.0377	-40.619	1014.4615	-1.9976	1.1321	-0.19365	34.933	8.325	1033.068	-0.43799	0.15699	-0.17749	-113.856	-24.3091	15.685	-0.095215	-0.069824	0.17676	NaN	NaN	NaN	NaN	NaN	NaN
3.976	-142.70501	-41.0592	1017.99642	-2.1726	1.3009	-0.16787	-6.218	-4.375	1164.809	-0.57373	0.20752	-0.16992	-99.0701	10.021	-5.725	-0.045166	-0.099123	0.17968	NaN	NaN	NaN	NaN	NaN	NaN
3.978	-111.49046	-60.0424	1000.6583	-2.3047	1.4738	-0.14111	9.018	46.413	1214.274	-0.80615	0.28418	-0.14941	-112.48	15.799	18.146	0.00048828	-0.12842	0.17725	NaN	NaN	NaN	NaN	NaN	NaN
3.98	-104.6418	-82.8897	995.91614	-2.3906	1.6309	-0.14209	-42.462	-22.605	1215.539	-0.94336	0.32617	-0.14063	-118.538	40.9148	26.733	0.075684	-0.17041	0.17285	NaN	NaN	NaN	NaN	NaN	NaN
3.982	-80.1432	-91.2184	1008.1416	-2.4051	1.7332	-0.16504	-55.446	-55.1132	1240.644	-1.2617	0.42383	-0.10889	-133.735	35.789	34.6776	0.13306	-0.20142	0.17358	NaN	NaN	NaN	NaN	NaN	NaN
3.984	-72.7305	-97.739	1017.148	-2.3457	1.7492	-0.21113	-101.998	-83.366	1219.855	-1.5417	0.51489	-0.081299	-90.166	45.8721	7.847	0.18945	-0.23438	0.17236	NaN	NaN	NaN	NaN	NaN	NaN
3.986	-38.898	-107.4394	1025.512	-2.1899	1.6754	-0.2623	-127.244	-159.818	1225.88	-1.8413	0.61377	-0.050293	-61.932	50.298	-12.984	0.25	-0.27783	0.15918	NaN	NaN	NaN	NaN	NaN	NaN
3.988	-21.734	-113.3931	1031.0383	-1.9693	1.5514	-0.30645	-109.594	-136.709	1228.642	-2.2671	0.76025	-0.021484	-43.613	53.9652	6.938	0.28027	-0.29053	0.16113	NaN	NaN	NaN	NaN	NaN	NaN
3.99	-2.657	-137.583	1063.221	-1.7344	1.4023	-0.33105	-128.36	-149.413	1162.555	-2.478	0.83545	-0.020508	-56.4785	55.157	24.546	0.32275	-0.31934	0.16016	NaN	NaN	NaN	NaN	NaN	NaN
3.992	25.279	-145.31	1081.519	-1.5363	1.2586	-0.36621	-125.118	-162.012	1123.481	-2.8687	1.0103	-0.02832	-26.1	44.5782	21.441	0.3396	-0.33105	0.15332	NaN	NaN	NaN	NaN	NaN	NaN
3.994	13.105	-138.477	1071.562	-1.3758	1.1418	-0.37881	-100.0511	-79.745	1065.46449	-3.0789	1.1931	-0.049072	-14.813	40.153	13.6391	0.34473	-0.33691	0.146	NaN	NaN	NaN	NaN	NaN	NaN
3.996	22.392	-127.924	1068.568	-1.257	1.052	-0.37139	-122.869	-72.387	1052.675	-3.2031	1.4121	-0.039551	6.125	32.5336	26.7491	0.34375	-0.32617	0.14453	NaN	NaN	NaN	NaN	NaN	NaN
[truncated: 28,002 more rows]
