# Supplementary material for: Reliability and Validity of Running Cadence and Stance Time Derived from Instrumented Wireless Earbuds
Source: Sensors (Basel). 2021 Nov 30;21(23):7995. doi: 10.3390/s21237995 (PMC8659722; doi:10.3390/s21237995)
Supplement: Supplementary file 1 [file sensors-21-07995-s001.zip › Data_P14_HeadMovements.csv]

time	up_force_plate_1	up_force_plate_2	up_force_plate_3	up_earbuds_1	up_earbuds_2	up_earbuds_3	down_force_plate_1	down_force_plate_2	down_force_plate_3	down_earbuds_1	down_earbuds_2	down_earbuds_3	shake_force_plate_1	shake_force_plate_2	shake_force_plate_3	shake_earbuds_1	shake_earbuds_2	shake_earbuds_3	nod_force_plate_1	nod_force_plate_2	nod_force_plate_3	nod_earbuds_1	nod_earbuds_2	nod_earbuds_3	bird_L_force_plate_1	bird_L_force_plate_2	bird_L_force_plate_3	bird_L_earbuds_1	bird_L_earbuds_2	bird_L_earbuds_3	bird_R_force_plate_1	bird_R_force_plate_2	bird_R_force_plate_3	bird_R_earbuds_1	bird_R_earbuds_2	bird_R_earbuds_3	check_watch_force_plate_1	check_watch_force_plate_2	check_watch_force_plate_3	check_watch_earbuds_1	check_watch_earbuds_2	check_watch_earbuds_3
0	-49.8871	38.137	-7.1453	0.2168	-0.19922	0.091309	-20.26	21.7925	10.2802	-0.0048828	-0.067383	0.085449	18.599	149.919	558.0103	-0.67529	0.23291	-0.039551	38.5496	-36.16	1436.4529	-2.3081	0.93896	-0.45947	-36.5076	-53.931	183.7349	-0.11328	0.2334	-0.03125	24.243	32.245	16.436	0.050293	-0.10547	-0.043945	59.4713	-40.199	1478.72	-2.2988	1.082	-0.54932
0.002	3.426	9.9188	21.5309	0.23897	-0.21729	0.096094	-34.083	1.7989	15.341	0.013379	-0.079004	0.08623	37.605	186.373	497.911	-0.6311	0.21557	-0.032471	39.0448	-73.815	1434.4602	-2.3435	0.99537	-0.45484	-17.5211	-39.196	236.457	-0.16455	0.24756	-0.042969	3.47	-8.1565	29.881	0.051514	-0.10571	-0.04126	-6.829	-63.092	1484.849	-2.2554	1.0474	-0.5542
0.004	1.92	34.154	19.5266	0.24854	-0.23204	0.094141	-8.576	42.506	12.324	0.028809	-0.094044	0.086328	5.993	159.539	465.811	-0.58936	0.1958	-0.030273	-4.702	-74.427	1433.9412	-2.3789	1.0449	-0.4502	-53.311	-74.262	324.791	-0.21777	0.26172	-0.054932	55.7786	13.423	31.4695	0.056152	-0.1084	-0.038086	-7.686	-11.391	1480.2324	-2.2234	1.011	-0.56006
0.006	-27.742	8.814	15.4129	0.25244	-0.23476	0.083594	-6.118	36.969	6.598	0.044824	-0.11357	0.085938	42.911	177.143	448.247	-0.52637	0.17236	-0.019043	-52.8692	-5.847	1406.579	-2.4214	1.0923	-0.46631	-74.447	-108.397	410.791	-0.28125	0.2793	-0.075195	31.005	25.239	5.6547	0.061523	-0.10596	-0.029297	-49.16383	14.1407	1453.493	-2.1953	0.98047	-0.55713
0.008	14.409	3.2344	23.6934	0.25195	-0.24004	0.072754	-9.892	12.66163	8.278	0.061719	-0.13281	0.083887	32.475	196.595	398.0801	-0.49609	0.16064	-0.023438	-1.237	-73.314	1455.522	-2.437	1.1099	-0.47217	-144.132	-86.205	504.981	-0.38672	0.30176	-0.10449	43.611	0.3334	18.6271	0.060791	-0.10523	-0.023194	-22.8	5.96	1496.576	-2.1699	0.93555	-0.55273
0.01	-11.489	25.7727	5.68817	0.26172	-0.24707	0.068848	10.114	35.8092	10.7533	0.075684	-0.14697	0.081055	35.162	161.8221	382.781	-0.43115	0.1333	-0.01709	-16.065	-70.87	1489.8609	-2.4741	1.1216	-0.4917	-160.778	-109.8077	587.339	-0.45068	0.31299	-0.11963	53.1496	25.676	16.16387	0.061523	-0.10498	-0.017578	11.6	69.06108	1483.405	-2.1597	0.9165	-0.55225
0.012	-1.935	-5.768	26.9812	0.25986	-0.25039	0.063379	15.55	0.552	7.8008	0.084961	-0.1625	0.078516	91.048	186.495	357.089	-0.38574	0.10937	-0.020996	-15.185	-92.042	1498.822	-2.4919	1.1292	-0.51343	-130.547	-62.7895	606.031	-0.60547	0.35449	-0.14307	-4.007	7.2114	2.52174	0.063965	-0.104	-0.0078125	-30.644	42.233	1456.5466	-2.1406	0.88477	-0.55273
0.014	29.82	9.9937	46.697	0.25547	-0.25224	0.054199	10.575	16.38555	21.3273	0.10185	-0.17841	0.07334	57.687	164.067	329.807	-0.34033	0.085938	-0.021484	18.057	-153.675	1517.992	-2.5034	1.1382	-0.53174	-129.985	-29.758	623.399	-0.74292	0.38355	-0.15137	31.5039	22.2757	24.816	0.062988	-0.10938	-0.0039063	-12.899	42.81	1445.7632	-2.1238	0.86743	-0.54883
0.016	3.221	18.8261	29.9955	0.24805	-0.25147	0.046386	27.7658	38.386	0.8559	0.10576	-0.18857	0.070606	58.8239	153.306	337.3146	-0.28271	0.057129	-0.020508	16.946	-85.5913	1522.715	-2.5015	1.1372	-0.55127	-67.49	-57.3794	682.237	-0.89404	0.4126	-0.15283	12.802	59.384	-9.988	0.061035	-0.11035	0.0048828	-5.026	88.717	1392.401	-2.0991	0.85986	-0.54346
0.018	12.188	11.5352	33.7925	0.23779	-0.24932	0.038086	28.978	6.9192	15.6975	0.11104	-0.1961	0.066016	52.9314	182.763	294.5509	-0.25488	0.043945	-0.019043	35.2659	-91.4569	1506.153	-2.5044	1.1333	-0.5542	-42.119	-27.2974	713.135	-1.1099	0.45361	-0.12549	-11.76	26.4573	9.9217	0.06958	-0.10693	0.0090332	3.661	38.8171	1403.724	-2.0737	0.84814	-0.52832
0.02	28.4473	53.563	9.9769	0.2207	-0.24072	0.037598	9.525	35.948	27.7589	0.10938	-0.20215	0.062012	29.263	128.856	274.1001	-0.20264	0.0048828	-0.020996	51.667	-78.345	1511.2259	-2.4941	1.1191	-0.57129	-33.108	-39.57094	716.307	-1.2976	0.47388	-0.095949	23.861	27.438	28.112	0.075684	-0.104	0.013672	62.152	65.3985	1438.3279	-2.063	0.83936	-0.52295
0.022	23.7621	29.3053	12.3992	0.20108	-0.23301	0.038281	11.651	20.8856	12.781	0.10547	-0.20947	0.056641	67.324	127.378	275.339	-0.17481	-0.012451	-0.020019	36.0566	-11.152	1464.123	-2.4878	1.1108	-0.57861	27.681	-34.547	728.372	-1.4897	0.50635	-0.071289	-24.431	24.76	-3.5459	0.078125	-0.10596	0.022461	35.21	50.131	1411.1144	-2.0464	0.81494	-0.50781
0.024	44.168	12.8922	7.8378	0.17763	-0.221	0.037793	7.472	6.6679	23.046	0.095801	-0.21006	0.049414	17.387	130.645	238.7043	-0.14063	-0.032227	-0.025879	4.784	-76.1812	1475.882	-2.4722	1.0962	-0.5791	16.118	14.042	703.624	-1.7598	0.55664	-0.060547	-11.759	8.9163	15.609	0.084473	-0.10596	0.036621	37.111	-11.094	1428.015	-2.0337	0.79541	-0.49487
0.026	22.084	32.2634	-3.7678	0.1499	-0.20498	0.040918	28.836	47.7992	9.3231	0.084473	-0.20576	0.053321	4.23	78.8573	233.4688	-0.1001	-0.058594	-0.029297	-36.3052	-21.757	1499.048	-2.4487	1.0737	-0.57861	39.416	-25.08967	719.4559	-1.8906	0.60742	-0.072266	-10.092	53.148	23.0196	0.091309	-0.104	0.030762	35.402	27.7292	1410.278	-2.0229	0.77783	-0.48389
0.028	32.334	-2.051	0.9462	0.12383	-0.18555	0.041894	12.228	0.844999999999999	8.2717	0.066992	-0.20059	0.053418	17.748	117.7764	215.5886	-0.083984	-0.067871	-0.027832	-62.332	12.9034	1491.453	-2.4312	1.0669	-0.57959	51.032	-28.0246	685.878	-2.1382	0.73877	-0.12793	-52.0281	44.702	23.8961	0.096191	-0.10718	0.0354	-10.47	12.104	1397.2743	-2.0054	0.77197	-0.46631
0.03	19.45	31.3938	-4.13768	0.10059	-0.16113	0.041992	1.707	7.905	13.1368	0.049316	-0.18896	0.053223	-45.0654	119.439	174.106	-0.052246	-0.085938	-0.024902	-60.0795	-17.665	1511.613	-2.3926	1.042	-0.58594	7.831	-35.7574	652.19	-2.2303	0.86646	-0.15649	-18.302	23.88789	39.767	0.10742	-0.11328	0.036133	35.187	32.509	1402.418	-1.9956	0.77197	-0.4585
0.032	-23.2868	39.4867	8.0695	0.079688	-0.13887	0.039453	-2.387	24.2037	-6.0228	0.027637	-0.17724	0.055762	-28.847	110.209	192.58898	-0.03125	-0.10449	-0.020264	-55.89658	62.996	1476.256	-2.3533	1.0208	-0.58423	37.2669	-89.398	699.5235	-2.228	0.979	-0.1626	-21.234	30.5767	1.684	0.11572	-0.11816	0.043457	25.974	89.541	1340.504	-1.9604	0.77783	-0.44678
0.034	19.928	14.4904	43.5746	0.062403	-0.11387	0.03916	-1.072	3.9982	3.72569	-0.00097652	-0.16026	0.059473	-16.403	130.423	164.522	-0.014648	-0.12061	-0.023438	-60.605	19.092	1422.546	-2.3145	0.99609	-0.57813	22.515	-79.961	756.2868	-2.1211	1.1094	-0.1875	-51.2863	-14.366	14.9519	0.12012	-0.12598	0.041504	-23.824	42.071	1297.141	-1.9287	0.78418	-0.43701
0.036	-14.453	44.137	28.2685	0.054199	-0.09043	0.036816	19.056	52.384	42.008	-0.025195	-0.14033	0.065332	-68.4781	91.329	154.823	0.0014648	-0.13428	-0.023438	-62.2475	0.474	1400.561	-2.252	0.9502	-0.57617	-0.640999999999998	-92.977	811.979	-2.0327	1.1626	-0.20264	-20.289	7.3984	33.114	0.13232	-0.13574	0.038086	20.321	68.762	1271.884	-1.8965	0.78711	-0.42871
0.038	-18.56	16.5142	36.392	0.049024	-0.069531	0.032422	-9.068	33.506	33.6751	-0.050098	-0.11504	0.068652	-34.898	86.119	138.467	0.010254	-0.146	-0.024414	-53.0733	81.498	1376.7073	-2.2222	0.91943	-0.5708	62.0294	-145.852	846.381	-1.8164	1.2441	-0.24414	-37.4714	12.5848	25.9267	0.13965	-0.14379	0.038086	-9.32100000000001	78.4766	1234.992	-1.8379	0.7832	-0.41797
0.04	6.35	-7.5077	24.8663	0.05127	-0.05127	0.024414	-17.838	9.1693	28.3432	-0.070313	-0.088379	0.072266	-49.44153	101.772	118.407	0.020996	-0.1543	-0.019531	-25.786	12.625314	1397.909	-2.1738	0.86328	-0.56055	54.922	-131.553	817.836	-1.6441	1.2514	-0.28125	-36.1988	0.2984	43.2149	0.14209	-0.15576	0.038086	18.245	56.038	1234.0895	-1.8066	0.78125	-0.41602
0.042	-51.3468	18.7412	-2.311	0.053614	-0.032422	0.018262	-16.554	53.335	13.6091	-0.088281	-0.065332	0.074707	-66.323	84.679	117.2749	0.030762	-0.16138	-0.023682	-4.004	57.4602	1415.808	-2.1328	0.82714	-0.55371	65.4112	-213.856	843.123	-1.4912	1.207	-0.31934	-8.082	23.1149	12.8139	0.13965	-0.16699	0.031738	48.5913	125.422	1189.722	-1.7397	0.77783	-0.39795
0.044	-25.502	-13.177	6.4536	0.065235	-0.014453	0.0097657	-31.3954	12.83	7.2438	-0.10274	-0.036524	0.082032	-17.401	123.009	89.855	0.043945	-0.16992	-0.016113	-4.811	51.642	1398.13411	-2.0957	0.79297	-0.55078	103.388	-259.553	878.171	-1.3296	1.0591	-0.3335	-37.871	-1.0022	25.736	0.14014	-0.16748	0.027832	4.301	98.356	1146.5	-1.6873	0.77124	-0.38452
0.046	4.145	9.7796	9.32246	0.077735	-0.0011719	0.0011719	-22.516	11.081	32.9497	-0.10898	-0.012305	0.08125	-63.0519	91.871	60.4126	0.051758	-0.17432	-0.011719	7.034	-14.8247	1393.9095	-2.0469	0.75391	-0.53418	70.2592	-238.652	908.594	-1.2715	0.95703	-0.33496	5.183	6.3962	34.436	0.13037	-0.18408	0.022949	44.9721	106.96	1129.9959	-1.6309	0.76367	-0.37109
0.048	-30.233	21.3498	1.7849	0.090918	0.0024414	-0.0079102	-17.201	19.8707	17.906	-0.11269	0.010449	0.08086	-35.115	70.153	71.57771	0.060059	-0.18066	-0.014405	15.936	63.062	1377.134	-2.0254	0.74609	-0.5332	60.7812	-283.349	986.2768	-1.2163	0.73877	-0.32568	10.698	36.1807	6.7033	0.12378	-0.19116	0.022217	43.828	158.744	1084.5975	-1.5571	0.75049	-0.35254
0.05	-17.01	-3.0498	19.7835	0.104	0.0078125	-0.016602	-37.7392	-12.01439	-2.03908	-0.11133	0.038574	0.082031	-30.499	94.081	58.6418	0.065918	-0.18311	-0.01123	-5.691	37.1777	1362.65061	-1.9873	0.71094	-0.52051	40.4	-265.874	1016.28	-1.2109	0.59668	-0.32153	-10.923	19.51	13.9132	0.11035	-0.1958	0.024902	1.249	115.582	1089.79025	-1.5156	0.74219	-0.34766
0.052	-17.641	34.312	25.3039	0.11407	0.014844	-0.022558	-15.254	27.0987	7.6634	-0.10654	0.05791	0.076269	-22.357	51.802	79.111	0.074219	-0.18359	-0.0092773	3.222	63.185	1348.8989	-1.9607	0.69116	-0.50806	-27.544	-264.1043	1041.237	-1.2358	0.48486	-0.32324	28.9475	31.971	17.0725	0.089844	-0.20068	0.02832	48.5323	141.031	1066.738	-1.4409	0.72363	-0.32861
0.054	-43.6074	23.2807	21.4362	0.12246	0.01709	-0.027636	-9.612	24.924	14.2222	-0.096094	0.07168	0.072168	30.931	50.884	78.498	0.07666	-0.18555	-0.0029297	-4.055	122.5962	1315.071	-1.9375	0.67285	-0.49805	-28.172	-282.991	1116.2686	-1.2925	0.38525	-0.31787	14.633	28.312	-8.1581	0.080566	-0.19824	0.022461	-26.3721	103.622	1027.5147	-1.3825	0.71265	-0.31567
0.056	-20.115	27.45	29.8076	0.13379	0.017871	-0.033496	-35.72	0.1963	34.9722	-0.085938	0.082227	0.06748	-12.867	49.262	57.167	0.084473	-0.18164	0.0048828	-7.207	37.194	1271.108	-1.9058	0.65674	-0.48242	-34.5786	-185.855	1132.16	-1.3442	0.36279	-0.31396	20.695	10.76259	17.6309	0.055664	-0.19189	0.026367	-50.8881	48.026	1016.897	-1.3242	0.70215	-0.30518
0.058	-13.069	55.973	27.6713	0.14385	0.022461	-0.038672	-6.276	43.53	25.0075	-0.068457	0.084766	0.061816	16.238	6.3865	64.328	0.083496	-0.18164	0.0056152	11.817	77.524	1245.493	-1.8921	0.65088	-0.4751	-44.37	-170.3573	1164.029	-1.4746	0.36719	-0.31836	45.547	22.9413	9.8209	0.032959	-0.18457	0.032959	-22.1751	98.25	976.372	-1.2539	0.68457	-0.28418
0.06	-20.349	-9.2172	11.6026	0.14551	0.023438	-0.044434	-2.923	5.1165	17.8899	-0.057617	0.084961	0.05127	41.23	29.9629	41.445	0.088867	-0.17676	0.0083008	-0.922000000000001	95.077	1204.4293	-1.8564	0.65039	-0.46289	-44.9615	-128.654	1219.614	-1.5896	0.43213	-0.32446	-2.957	13.9997	1.931	0.011719	-0.1709	0.036133	-40.036	69.362	931.9893	-1.2168	0.66797	-0.27002
0.062	3.879	11.6007	-0.6657	0.14873	0.030176	-0.045703	5.745	5.6393	32.5686	-0.043067	0.081152	0.044238	24.0901	12.5327	20.6207	0.089355	-0.16748	0.013672	15.884	65.2154	1199.853	-1.8125	0.64941	-0.44727	-79.614	-65.9	1217.3824	-1.7065	0.52979	-0.33057	28.8247	8.7289	30.4592	-0.015625	-0.14795	0.039551	-13.845	95.52761	914.135	-1.1538	0.64502	-0.24951
0.064	0.00400000000000134	32.292	-13.8953	0.15283	0.037598	-0.050098	12.838	29.1621	27.681	-0.028125	0.070508	0.03291	57.2937	2.0596	46.9696	0.09082	-0.16602	0.019043	36.2911	154.137	1157.985	-1.7847	0.65088	-0.43701	-31.382	-97.086	1264.5604	-1.8574	0.69873	-0.35205	44.143	27.1288	22.9522	-0.024902	-0.13574	0.038574	-35.819	141.419	853.876	-1.0933	0.61865	-0.22363
0.066	19.4	10.2411	15.7976	0.15322	0.045801	-0.055176	-2.396	-7.5848	14.5629	-0.015234	0.056055	0.023535	56.47	23.3248	36.97	0.089355	-0.15869	0.025391	35.3645	117.582	1104.297	-1.7319	0.64893	-0.4292	-31.625	-57.626	1293.7437	-1.9258	0.7832	-0.35938	4.947	0.924999999999999	14.98031	-0.045898	-0.10742	0.04834	-37.5614	105.855	827.461	-1.0581	0.604	-0.21338
0.068	14.597	50.212	32.32	0.15303	0.055567	-0.059375	-1.653	36.264	3.928	-0.0052735	0.042383	0.012207	19.006	-11.5958	30.4037	0.084961	-0.15869	0.03003	23.8103	107.688	1106.6876	-1.6892	0.64502	-0.41675	-41.494	-38.712	1311.6066	-2.0605	0.94434	-0.36328	56.795	1.524	22.2794	-0.058837	-0.08374	0.048584	24.217	159.499	815.2635	-0.99707	0.57568	-0.1875
0.07	16.002	9.6776	26.3352	0.14844	0.065918	-0.061523	7.3	29.2641	-4.63945	0.0058594	0.024902	-0.0019531	65.4561	9.7819	19.8283	0.082031	-0.1543	0.03125	33.9386	170.26	1061.9766	-1.6421	0.64307	-0.3999	-14.916	-107.961	1384.087	-2.1563	1.0567	-0.37256	7.491	15.5411	-12.3919	-0.069824	-0.058594	0.047852	-13.275	165.235	770.6833	-0.95166	0.55762	-0.16919
0.072	27.68	-6.7744	21.3058	0.14619	0.07666	-0.069336	28.729	-3.1924	36.3243	0.016114	0.0083986	-0.016992	41.236	32.56	-12.3212	0.074707	-0.15967	0.041016	38.6225	117.5225	1064.3941	-1.5781	0.63086	-0.38184	-48.717	-78.219	1394.931	-2.25	1.1602	-0.38477	-11.178	-5.273	10.624	-0.083496	-0.02832	0.055664	17.011	149.596	782.509	-0.91016	0.53711	-0.15674
0.074	17.924	26.582	-2.5622	0.1416	0.09287	-0.074609	13.292	5.58001	57.3768	0.027051	-0.0059571	-0.032812	20.892	8.5454542	10.248	0.06543	-0.16162	0.039063	22.507	163.193	1040.419	-1.5483	0.62744	-0.37256	-59.594	-120.698	1408.5652	-2.3687	1.2808	-0.39795	10.89	23.345	20.2499	-0.089355	-0.01123	0.055176	17.178	203.541	728.346	-0.85205	0.51025	-0.1377
0.076	36.8159	-6.4803	23.9881	0.1291	0.10928	-0.082812	6.835	-58.743	62.767	0.028613	-0.012598	-0.050391	45.5513	40.8089	-4.1086	0.057129	-0.16553	0.04834	-37.908	166.639	1001.428	-1.4844	0.61914	-0.35205	-22.863	-165.418	1439.76982	-2.4355	1.3281	-0.40918	-29.525	15.0798	5.4622	-0.089844	0.020508	0.062988	-47.2495	175.959	673.16427	-0.8252	0.50293	-0.12891
0.078	22.222	22.9185	15.0773	0.12178	0.12861	-0.087402	14.946	-43.6321	76.5882	0.036426	-0.024902	-0.069043	-17.245	13.9471	-7.0876	0.04834	-0.16553	0.049316	-55.918	88.183	998.902	-1.4382	0.6062	-0.3352	-20.528	-119.367	1429.7925	-2.5469	1.4277	-0.41895	6.229	10.1188	27.194	-0.091797	0.039551	0.064453	-38.5772	177.0366	639.4883	-0.75977	0.47266	-0.11279
0.08	-8.784	33.532	-5.1647	0.10352	0.14258	-0.095215	-0.0992000000000006	-10.44	83.326	0.040039	-0.033691	-0.085449	5.144	12.5487	2.8915	0.044922	-0.16553	0.059082	-35.2465	147.2016	956.009	-1.3882	0.59912	-0.31641	-13.803	-163.2426	1468.12	-2.617	1.4827	-0.42261	-11.625	37.347	9.137	-0.09082	0.058105	0.064453	-50.8407	199.7871	587.842	-0.71582	0.45117	-0.10254
0.082	24.419	-1.5922	9.2628	0.083887	0.16211	-0.10293	-1.76	-61.43	121.4277	0.038867	-0.04336	-0.10898	13.875	26.5949	12.8685	0.034668	-0.16846	0.060547	-51.074	98.819	921.3019	-1.3223	0.58203	-0.29102	13.946	-130.9844	1507.032	-2.668	1.5273	-0.4248	-46.7539	15.3226	15.3049	-0.081055	0.077148	0.06543	-64.2959	149.725	590.47	-0.67529	0.43262	-0.091309
0.084	17.284	23.6177	39.223	0.060059	0.18145	-0.10537	20.871	-45.149	148.9945	0.036231	-0.049414	-0.1334	-39.055	0.2096	5.202	0.033691	-0.16895	0.061035	-50.1267	110.6728	880.197	-1.2871	0.57568	-0.28027	11.1392	-84.95	1509.739	-2.6948	1.5571	-0.42236	-14.534	39.686	13.1228	-0.073242	0.085449	0.068359	-7.876	183.1148	564.1093	-0.62109	0.41211	-0.083008
0.086	-3.37	-9.809	67.2831	0.034277	0.20332	-0.11006	11.933	-47.9831	170.383	0.026074	-0.060742	-0.16152	-20.036	25.7469	21.5462	0.031738	-0.16699	0.064941	-55.487	187.742	839.6345	-1.2207	0.5625	-0.26172	48.873	-129.9	1566.18	-2.6973	1.5645	-0.42578	-50.0365	58.284	-7.0025	-0.054688	0.09082	0.062988	-35.338	165.325	511.37056	-0.5957	0.39844	-0.077637
0.088	34.061	-32.5287	103.1224	0.0033202	0.2248	-0.11386	2.574	-50.3775	254.713	0.008887	-0.060351	-0.19053	-40.7585	42.564	-16.0914	0.033447	-0.16992	0.064941	-64.651	127.989	814.773	-1.165	0.54639	-0.24194	72.979	-58.2532	1579.982	-2.6792	1.5708	-0.41895	-30.045	28.1355	9.5184	-0.040772	0.096436	0.057373	-21.9188	128.674	498.8826	-0.5498	0.375	-0.064453
0.09	-9.611	5.884	80.972	-0.02832	0.25244	-0.11426	31.82	42.24	405.8819	-0.012695	-0.052734	-0.21045	-54.9791	8.121	2.2622	0.035645	-0.16846	0.067871	-43.29873	178.839	786.36	-1.1133	0.52734	-0.22852	49.39	-58.8602	1526.58	-2.6616	1.562	-0.41626	-22.354	30.612	3.0461	-0.024902	0.092773	0.044922	3.385	167.342	472.578	-0.51709	0.35766	-0.056641
0.092	-29.48	-31.593	115.157	-0.05918	0.27764	-0.11357	-20.144	43.107	537.498	-0.040723	-0.041699	-0.23428	-37.343	15.2015	8.64832	0.038086	-0.17334	0.06543	-28.8946	182.14	775.345	-1.0488	0.51807	-0.20801	53.004	-64.8108	1522.075	-2.6401	1.5571	-0.41162	-50.847	9.6952	11.131	-0.0029297	0.084961	0.03418	2.643	132.203	468.5047	-0.48877	0.34229	-0.04834
0.094	-13.494	-15.908	174.2226	-0.086816	0.30595	-0.11846	-13.799	71.3927	638.522	-0.08047	-0.03252	-0.25625	-58.7108	-9.8655	4.906	0.039063	-0.17236	0.06543	-24.43408	132.265	775.007	-1.0132	0.51123	-0.19678	26.995	9.248	1452.619	-2.605	1.5386	-0.40381	-10.886	4.4506	28.323	0.0073242	0.081543	0.027832	31.3252	134.854	451.2716	-0.45654	0.32471	-0.038086
0.096	-66.978	-9.484	224.95	-0.12041	0.33135	-0.12198	8.185	95.117	660.082	-0.13086	-0.018457	-0.28281	-36.3079	-3.528	23.4792	0.044434	-0.1748	0.064941	-30.219	195.47	725.125	-0.95313	0.50195	-0.18164	23.69	-36.337	1466.9854	-2.5879	1.5293	-0.39941	-36.9248	32.7819	5.3058	0.025391	0.066895	0.013184	0.553000000000001	168.184	408.7671	-0.44482	0.31592	-0.035156
0.098	-51.335	-40.2029	329.563	-0.15107	0.36494	-0.12705	-41.362	33.3026	720.908	-0.18613	-0.014649	-0.31367	-35.475	25.8365	6.6363	0.050782	-0.17627	0.065918	-70.198	156.4987	681.3961	-0.90796	0.49194	-0.1643	45.331	-24.002	1490.7638	-2.5527	1.498	-0.39111	-33.3679	11.936	22.5929	0.040283	0.059815	0.0024414	-20.9155	129.0403	400.2823	-0.4165	0.30615	-0.025879
0.1	-76.241	11.9419	439.729	-0.18604	0.39502	-0.13281	-16.258	14.532	844.298	-0.25293	-0.003418	-0.34375	-60.7047	10.6664	14.2686	0.056641	-0.17871	0.068359	-68.273	164.59648	626.2097	-0.86475	0.47705	-0.146	24.5102	14.397	1458.715	-2.529	1.4768	-0.37378	10.754	15.8075	26.793	0.049805	0.049316	-0.011719	-18.5483	157.3268	382.113	-0.39624	0.29248	-0.018066
0.102	-142.515	2.074	540.8972	-0.22315	0.43056	-0.14131	-23.709	-25.363	911.855	-0.34902	0.006738	-0.38682	-36.815	31.697	25.5765	0.059082	-0.18506	0.067871	-54.154	217.867	596.1364	-0.80469	0.46094	-0.13086	46.3408	-46.881	1482.4569	-2.5039	1.4492	-0.35547	-6.064	32.423	10.1236	0.062012	0.03125	-0.035645	-61.735	152.4027	340.4827	-0.37842	0.2876	-0.012695
0.104	-118.589	2.4697	651.366	-0.2664	0.46563	-0.15352	-24.71	-57.323	913.279	-0.45371	0.028906	-0.42539	-39.7925	45.904	-3.2164	0.064453	-0.18652	0.072754	-41.1957	135.567	577.719	-0.77881	0.44873	-0.12012	16.487	16.1914	1491.228	-2.4839	1.397	-0.33057	7.872	5.19395	24.9167	0.0625	0.023438	-0.043945	-47.1079	125.0642	316.58611	-0.36084	0.27051	-0.0043945
0.106	-130.177	31.6583	712.937	-0.3168	0.50117	-0.17032	2.0325	-41.825	848.431	-0.5791	0.057422	-0.45078	-2.964	35.639	10.9202	0.063965	-0.18994	0.069824	-37.8043	160.3676	547.3721	-0.72314	0.43213	-0.104	-6.021	8.3082	1467.7749	-2.4785	1.3672	-0.31982	36.539	27.427	16.1233	0.066406	0.020508	-0.06543	-29.9706	140.9429	272.7327	-0.35303	0.271	-0.003418
0.108	-114.112	-16.945	773.2954	-0.38027	0.53418	-0.1914	-5.608	-120.0435	823.955	-0.72549	0.091993	-0.46191	29.5867	52.181	6.3332	0.067383	-0.19019	0.068603	-28.256	147.5844	523.126	-0.68628	0.41381	-0.091553	-12.904	-27.204	1500.3861	-2.459	1.2988	-0.2998	-6.926	20.84	30.1238	0.067383	0.015381	-0.078857	-68.816	99.9629	252.9091	-0.33154	0.25439	0.013672
0.11	-54.3309	-10.418	825.001	-0.44922	0.56641	-0.21143	-28.2933	-140.116	846.049	-0.89014	0.13721	-0.4541	-34.1277	34.557	-5.68255	0.068359	-0.19385	0.067871	-23.8585	96.825	512.657	-0.65186	0.40283	-0.083008	-14.839	30.10629	1478.2222	-2.4487	1.25	-0.2832	14.707	-11.85	64.0414	0.063477	0.013672	-0.095703	-44.7746	101.2197	233.9614	-0.31666	0.24854	0.015625
0.112	-36.34	-8.54900000000001	822.041	-0.53213	0.59287	-0.2333	-22.6111	-85.225	845.627	-1.0697	0.18535	-0.42402	23.393	27.5571	14.343	0.061523	-0.1958	0.06543	-5.7358	165.132	481.772	-0.6084	0.38574	-0.065918	-44.6711	-42.345	1486.3254	-2.439	1.2075	-0.27783	41.6773	-7.303	45.7275	0.060547	0.015625	-0.11523	-23.596	123.796	205.86165	-0.30127	0.23926	0.023438
0.114	-4.563	-73.712	832.069	-0.62412	0.61748	-0.25342	-8.3571	-89.79	868.316	-1.2589	0.24814	-0.37139	39.876	48.489	-8.919008	0.054688	-0.19922	0.067383	5.8624	119.057	450.0014	-0.58398	0.37988	-0.0625	-45.0016	-35.083	1505.759	-2.4175	1.147	-0.27002	-1.402	-39.55	66.7154	0.054688	0.0097656	-0.13086	-22.2844	100.124	203.327	-0.27979	0.23145	0.03418
0.116	28.92	-56.002	831.486	-0.73194	0.64326	-0.27608	4.194	-71.487	922.429	-1.4764	0.31494	-0.31553	11.1	25.0712	13.7209	0.037598	-0.1958	0.068359	17.12	123.666	414.0434	-0.53906	0.3623	-0.053223	-62.097	17.4936	1462.699	-2.3999	1.1235	-0.26563	37.9394	-16.243	89.892	0.04541	0.010742	-0.1626	10.16	130.51	196.4581	-0.27051	0.22607	0.040527
0.118	75.811	-63.1454	848.214	-0.86133	0.6625	-0.29444	-63.965	-115.708	947.457	-1.7368	0.40147	-0.27685	75.5105	24.5712	40.624	0.021972	-0.1936	0.06958	16.032	167.781	379.8898	-0.50513	0.35498	-0.04126	-66.533	-24.5917	1459.776583	-2.3652	1.0742	-0.26172	6.897	14.3782	106.0013	0.03003	0.0092773	-0.19287	-37.9504	113.895	168.7672	-0.25	0.21484	0.050781
0.12	102.099	-81.498	877.578	-1.002	0.67871	-0.31152	-94.584	-168.7416	984.391	-2.0195	0.51855	-0.25342	29.4125	32.2376	20.8689	-0.00048828	-0.18945	0.074707	-6.8588	105.0372	372.0928	-0.47314	0.33984	-0.033203	-50.1417	66.415	1422.57801	-2.3298	1.0545	-0.25611	29.023	-8.531	144.0238	0.010254	0.015137	-0.21875	-21.973	97.37	171.8413	-0.22852	0.2146	0.060791
0.122	70.442	-41.7596	879.906	-1.1694	0.70752	-0.32051	0.309000000000001	-118.505	1007.726	-2.2816	0.66065	-0.24111	29.2617	15.3626	21.5733	-0.027344	-0.17627	0.07666	-12.86411	152.045	367.182	-0.43945	0.32373	-0.030762	-81.722	56.009	1376.3183	-2.3042	1.0337	-0.25049	58.524	12.6789	159.275	-0.027344	0.03125	-0.24365	-21.6158	136.012	141.4838	-0.20801	0.20313	0.067383
0.124	72.0458	-109.769	881.5546	-1.3386	0.73174	-0.32959	24.028	-94.37	1041.522	-2.5039	0.81523	-0.25518	67.132	34.982	24.1558	-0.044922	-0.17236	0.078613	-48.466	145.696	346.9997	-0.42139	0.31543	-0.026855	-66.0241	22.288	1389.2846	-2.2578	1.0117	-0.24414	13.961	-7.0294	212.611	-0.053711	0.037109	-0.2583	-43.7518	83.267	154.8923	-0.17725	0.19336	0.075684
0.126	70.115	-136.184	903.2324	-1.4976	0.75713	-0.3206	24.316	-77.61	1110.9413	-2.6222	0.97656	-0.2665	28.625	24.2017	28.4019	-0.075195	-0.14746	0.083008	-14.272	100.105	317.9021	-0.39258	0.2959	-0.018066	-54.2327	105.36	1357.1911	-2.2339	0.99561	-0.24414	32.225	-3.51237	320.7721	-0.10889	0.046387	-0.29395	-17.965	55.5942	141.463	-0.1626	0.19189	0.07666
0.128	42.715	-118.541	935.9693	-1.6564	0.77861	-0.32139	17.266	-85.96	1080.75474	-2.6154	1.1437	-0.26387	29.506	-5.9897	38.739	-0.098388	-0.13354	0.079102	-14.3396	150.649	271.6008	-0.37451	0.28687	-0.010742	-39.0873	53.4174	1348.491	-2.1792	0.96924	-0.24365	15.543	55.7801	436.4048	-0.16528	0.052734	-0.31323	-46.0713	47.887	105.237	-0.12988	0.17773	0.085449
0.13	86.1387	-158.855	999.0611	-1.8032	0.80322	-0.32324	-20.923	-181.548	1048.636	-2.5156	1.3047	-0.27148	38.8366	3.1921	7.8846	-0.12109	-0.11768	0.076172	-48.74	87.042	221.8948	-0.35938	0.27246	-0.003418	-22.598	88.563	1350.8275	-2.1257	0.94311	-0.24536	3.594	76.08502	524.953	-0.23145	0.062988	-0.33887	-47.9942	8.16	80.1453	-0.10473	0.16553	0.084229
0.132	105.646	-110.176	1032.326	-1.9173	0.82842	-0.33291	31.8322	-234.973	1128.3415	-2.3558	1.4513	-0.29658	-6.942	-5.2852	3.02939	-0.14404	-0.086426	0.081543	-42.2223	94.5853	214.3419	-0.33984	0.26465	0.0063477	-44.0028	139.66	1306.512	-2.0664	0.92188	-0.25195	40.534	91.9651	610.829	-0.34668	0.078125	-0.37695	3.495	52.6431	72.867	-0.079102	0.16016	0.094238
0.134	86.0881	-121.197	998.794	-1.9963	0.85244	-0.33545	23.0611	-230.746	1197.977	-2.1753	1.5611	-0.34111	30.038	10.389	36.037	-0.15332	-0.067871	0.08252	-25.5261	132.984	205.4371	-0.33252	0.25928	0.013184	-31.8148	71.3903	1284.507	-1.9741	0.89111	-0.25928	-23.061	78.975	635.258	-0.4126	0.084473	-0.38965	-15.491	48.022	78.5176	-0.050781	0.13867	0.098145
0.136	124.7361	-193.3686	1018.4175	-2.0405	0.8833	-0.33427	-23.707	-272.793	1283.653	-2.0183	1.6173	-0.38487	1.378	39.272	31.3067	-0.16309	-0.040527	0.083008	-25.3292	70.7576	200.3568	-0.31543	0.24951	0.019043	-8.792	148.509	1263.4445	-1.9277	0.875	-0.26123	-31.82	20.2144	743.93083	-0.57275	0.11182	-0.41943	16.755	26.7699	65.6536	-0.038574	0.12695	0.1001
0.138	139.66	-170.133	1036.9777	-2.0516	0.91143	-0.33369	-48.7477	-261.943	1300.798	-1.8968	1.5833	-0.43076	-32.686	20.6695	29.0825	-0.16211	-0.016846	0.082031	-39.85479	116.255	181.2746	-0.2998	0.24121	0.027832	4.574	137.656	1242.061	-1.8394	0.8501	-0.25928	-3.19799999999999	-9.287	826.402	-0.70752	0.13965	-0.4209	28.064	44.72	36.5582	-0.01709	0.11377	0.10254
0.14	139.612	-229.041	1110.548	-2.0425	0.93506	-0.33936	-121.018	-279.618	1272.547	-1.8218	1.4653	-0.46729	-3.507	39.302	10.7733	-0.15381	0.0043945	0.075684	-57.782	116.901	157.2516	-0.28613	0.23389	0.036133	34.652	97.4742	1244.7182	-1.7861	0.82421	-0.25732	-20.598	-39.02	869.336	-0.85889	0.17236	-0.41357	-28.258	7.35896	28.2298	-0.0014648	0.091308	0.10645
0.142	153.765	-267.313	1194.5692	-2.0192	0.94209	-0.34932	-92.109	-292.085	1326.5857	-1.7776	1.2518	-0.4793	-61.6623	34.576	5.115	-0.1499	0.029785	0.071289	-31.8307	87.8524	152.9142	-0.25879	0.22266	0.043945	38.662	152.683	1224.732	-1.7378	0.79932	-0.25635	-1.44	-78.484	893.468	-1.0796	0.22119	-0.38281	30.614	31.8024	27.947	0.012207	0.073242	0.11035
0.144	82.402	-246.491	1195.1136	-1.9917	0.94228	-0.36534	-28.348	-182.764	1368.5487	-1.7402	0.99883	-0.47188	-47.1859	7.0378	30.8025	-0.14307	0.039063	0.069824	-47.7211	157.067	134.2932	-0.24316	0.21777	0.051758	41.5167	71.242	1197.252	-1.6772	0.76611	-0.25537	-5.0449	-89.03	836.681	-1.2031	0.25	-0.35742	32.3694	49.973	12.9273	0.02832	0.052246	0.11816
0.146	28.759	-304.127	1237.8108	-1.9593	0.91299	-0.36885	-13.383	-114.035	1422.2797	-1.7196	0.76719	-0.4457	-43.2356	24.584	22.0612	-0.12109	0.057617	0.055664	-54.9047	107.123	123.8073	-0.21729	0.20947	0.052734	42.739	79.658	1172.1028	-1.6445	0.74805	-0.25488	-45.019	-145.448	824.834	-1.4707	0.31934	-0.30176	-0.573999999999998	26.0531	24.6073	0.036133	0.039063	0.12012
0.148	-4.71100000000001	-274.524	1297.808	-1.9404	0.8627	-0.37529	19.682	-71.073	1467.346	-1.7358	0.58291	-0.43487	-68.0198	-0.392999999999999	7.9566	-0.10059	0.062255	0.045166	-48.2671	78.9978	119.2157	-0.19776	0.20288	0.058106	56.5887	142.846	1143.9417	-1.5776	0.7124	-0.25439	3.3933	-142.917	830.126	-1.8101	0.4292	-0.26514	17.066	48.128	8.56572	0.046387	0.018555	0.12451
0.15	-25.466	-212.9729	1346.02	-1.9277	0.78613	-0.38574	14.2601	-38.846	1421.143	-1.793	0.44434	-0.42578	-27.747	-4.54	11.3692	-0.072266	0.06543	0.037598	-50.236	92.4203	90.186	-0.1748	0.19824	0.06543	29.3301	91.083	1138.011	-1.5232	0.68383	-0.25317	-27.538	-93.51	829.543	-1.9956	0.49854	-0.24658	-34.4937	30.4679	-0.03886	0.05542	0.0012207	0.13134
0.152	-7.618	-206.593	1424.8336	-1.9188	0.70664	-0.39648	4.701	-90.393	1432.348	-1.8907	0.37334	-0.41015	-54.6309	12.2787	-16.2581	-0.041016	0.064941	0.022949	-40.5334	27.507	99.649	-0.14453	0.19043	0.067871	48.9244	166.277	1114.0107	-1.4727	0.65332	-0.25195	-45.4	-97.604	881.8565	-2.332	0.66504	-0.21484	1.805	7.9298	12.0163	0.067871	-0.010254	0.13477
0.154	-17.457	-123.199	1433.437	-1.9155	0.62803	-0.41533	68.2955	-72.833	1480.418	-2.0129	0.36211	-0.38789	-38.172	-9.2805	15.96	-0.02002	0.060547	0.013184	-29.011	85.069	70.012	-0.12939	0.18457	0.067383	40.0082	169.201	1070.7968	-1.4019	0.61963	-0.25439	-25.469986	-84.566	902.111	-2.5405	0.79638	-0.22607	20.267	43.551	6.4721843	0.08252	-0.03125	0.14307
0.156	-23.907	-125.70031	1436.3564	-1.9175	0.5581	-0.43213	57.312	-46.934	1477.977	-2.1508	0.41797	-0.37265	-14.822	18.0109	22.7551	0.0058594	0.055176	-0.0058594	-5.773	88.348	50.1638	-0.096191	0.17432	0.072754	21.614	145.3362	1062.1154	-1.3633	0.60156	-0.25586	-104.844	-119.004	921.587	-2.6538	0.93213	-0.23779	-24.307	13.2026	5.7953	0.091309	-0.041016	0.1416
0.158	-9.23	-117.3435	1464.538	-1.928	0.51152	-0.44277	13.097	-81.656	1491.933	-2.2809	0.51953	-0.36016	-50.9578	17.04502	7.8267	0.026612	0.042969	-0.019532	3.224	43.5118	69.851	-0.075439	0.16333	0.074951	38.025	218.283	1030.258	-1.2891	0.56836	-0.25684	-57.71	-163.2169	969.821	-2.5957	1.1016	-0.26172	10.199	6.57	-2.29254	0.10742	-0.058105	0.14551
0.16	8.696	-43.438	1455.53822	-1.9463	0.47656	-0.45313	-20.901	-49.5626	1463.347	-2.3804	0.65576	-0.36377	-0.478000000000002	-11.1622	26.423	0.037109	0.033203	-0.027832	-2.918	86.229	33.6271	-0.050293	0.15039	0.080566	18.311	163.007	988.4947	-1.2373	0.54493	-0.25831	0.0450000000000017	-142.618	979.8699	-2.4863	1.1758	-0.27539	2.428	11.4288	-20.8946	0.12427	-0.073486	0.15039
0.162	32.785	-94.686	1473.225	-1.9866	0.46065	-0.46201	-63.421	-92.558	1463.048	-2.4387	0.78828	-0.38613	15.102	8.2125478	25.4176	0.060059	0.018066	-0.048828	10.76	24.6106	38.6802	-0.026855	0.13281	0.084473	13.568	175.241	969.7013	-1.1821	0.51611	-0.25146	-19.597	-107.79	999.367	-2.1797	1.293	-0.33252	-10.632	-29.594	-5.8107	0.13574	-0.087402	0.14844
0.164	30.49	-87.437	1500.907	-2.0303	0.46709	-0.4667	6.281	-124.095	1549.7439	-2.4613	0.90234	-0.4123	-26.412	-10.1766	5.6129	0.0625	0.0087891	-0.057617	27.5646	24.2435	44.64745	-0.013184	0.12695	0.086426	-1.08	222.41	925.7469	-1.1128	0.48096	-0.25439	42.539	-88.57	1026.2162	-1.9317	1.3418	-0.39477	23.888	10.1868	5.7386	0.1543	-0.10254	0.146
0.166	2.002	-70.345	1501.857512	-2.0898	0.48467	-0.46513	48.474	-74.723	1564.45686	-2.4594	0.98789	-0.43926	30.776	-0.671565	8.267	0.073242	-0.0029297	-0.072754	25.937	54.535	47.932	0.0097656	0.11084	0.092773	-3.315	136.9314	914.8662	-1.0606	0.45166	-0.25366	1.054	-81.051	997.109	-1.7178	1.3418	-0.45605	-16.516	25.7584	-8.5267	0.16455	-0.10449	0.13818
0.168	-1.027	-133.8347	1559.2032	-2.1665	0.51416	-0.45752	29.695	-113.178	1589.542	-2.4501	1.0444	-0.47432	25.985	40.299	-27.4804	0.072754	-0.016357	-0.086914	27.404	4.2886	47.2665	0.028077	0.09912	0.093261	-12.621	196.62	887.98462	-1.0156	0.42285	-0.25244	6.401	-152.65	1008.752	-1.5215	1.2148	-0.49023	2.677	30.007	18.1971	0.17822	-0.11914	0.12939
0.17	0.277999999999999	-72.417	1569.676	-2.2559	0.55273	-0.45703	55.048	-92.996	1607.574	-2.4526	1.0747	-0.50928	9.878	26.557	-12.8952	0.069336	-0.022461	-0.1001	19.962	53.712	20.0093	0.04248	0.083984	0.10596	-42.8272	181.379	841.7152	-0.95068	0.39014	-0.24854	36.432	-217.1137	1080.268	-1.4688	1.0996	-0.49805	-2.166	58.094	9.09949	0.18995	-0.12476	0.12085
0.172	1.936	-83.272	1575.719	-2.3654	0.6	-0.46094	35.497	-57.633	1560.071	-2.4639	1.0756	-0.53848	56.7778	34.6284	15.0899	0.065918	-0.036133	-0.11719	9.13	38.155	2.3285	0.065918	0.063477	0.10156	-32.078	159.2516	842.926	-0.92236	0.37549	-0.24268	19.496	-228.509	1141.8208	-1.4121	0.80859	-0.5	-44.48	21.864	8.5102	0.2002	-0.13037	0.11035
0.174	12.959	-124.014	1630.2318	-2.4819	0.65869	-0.46143	66.776	-85.08829	1571.5184	-2.4815	1.0661	-0.56426	19.498	26.5139	14.84	0.062012	-0.044922	-0.12305	23.55	8.3634	29.537	0.078125	0.054688	0.11328	-42.058	230.533	784.531	-0.86377	0.3501	-0.24414	12.31	-266.851	1241.568	-1.408	0.58033	-0.47925	-1.622	24.34	25.9607	0.20947	-0.13623	0.097168
0.176	16.39	-70.1217	1613.097	-2.6081	0.72939	-0.45283	120.5	-18.395	1552.315	-2.505	1.0302	-0.57832	40.7613	-3.348	38.635	0.04541	-0.052246	-0.14502	24.427	54.439	27.749	0.095703	0.039063	0.12354	-49.2392	154.29336	763.101	-0.82519	0.33374	-0.24292	-47.6777	-235.119	1237.743	-1.4194	0.3833	-0.47217	-22.857	41.508	-2.7502	0.20898	-0.14111	0.091797
0.178	30.343	-124.377	1606.753	-2.7325	0.80303	-0.4417	57.463	-26.101	1523.845	-2.5189	0.99285	-0.58994	63.0534	7.656	39.0448	0.03125	-0.060302	-0.16309	10.352	7.9062	31.5402	0.11474	0.024658	0.12622	-41.984	160.4816	736.878	-0.78516	0.31445	-0.23242	-114.386	-221.715	1227.479	-1.4702	0.18018	-0.45654	-24.498	21.2879	17.6521	0.2085	-0.14795	0.072754
0.18	92.6361	-98.869	1641.088	-2.8438	0.87891	-0.42969	23.453	-39.603	1573.7023	-2.5234	0.9502	-0.59375	15.869	-18.918	55.5411	0.013672	-0.063477	-0.19531	21.019	10.0708	18.3624	0.12646	0.01123	0.12988	-28.3224	177.769	715.748	-0.73242	0.29688	-0.22949	-43.86	-230.607	1283.523	-1.5083	0.104	-0.44678	1.235	43.7	7.58486	0.20337	-0.15576	0.063965
0.182	108.169	-29.845	1624.751	-2.9362	0.96611	-0.41455	-11.654	40.0596	1536.977	-2.5142	0.92139	-0.6042	21.036	-24.978	81.17589	-0.01123	-0.061035	-0.21143	5.669	13.880071	-3.7237	0.15039	-0.0097656	0.14307	-11.068	106.941	694.735	-0.70654	0.2876	-0.22754	-30.664	-145.8178	1295.217	-1.625	0.01709	-0.42188	-45.3499	40.993	-22.0964	0.19531	-0.16064	0.050781
0.184	112.697	-89.79173	1644.494	-3.0026	1.0559	-0.40351	-45.1467	41.422	1520.0539	-2.4897	0.89033	-0.61621	-2.323	0.0530000000000008	77.912	-0.03125	-0.053223	-0.22412	-11.856	-26.27834	12.714	0.15918	-0.020508	0.14404	0.241999999999997	186.101	645.943	-0.65625	0.26514	-0.22363	-21.852	-134.504	1353.39417	-1.7263	0.017822	-0.39697	5.466	22.4176	2.4992	0.18604	-0.15967	0.043457
0.186	112.05	-31.197	1620.871	-3.0444	1.1407	-0.3875	11.102	67.917	1541.919	-2.4488	0.8751	-0.6291	13.154	-29.358	122.623	-0.067871	-0.044434	-0.24609	-1.003	13.764	10.9169	0.18701	-0.039551	0.14893	-11.141	162.618	604.2068	-0.61865	0.2478	-0.21338	50.144	-114.212	1389.882	-1.8433	0.07373	-0.38037	19.373	49.505	-7.5772589	0.17578	-0.16162	0.033691
0.188	110.384	-29.508	1561.036	-3.0647	1.2178	-0.38047	1.401	82.84707	1497.093	-2.3988	0.8624	-0.63672	53.794	-27.3289	178.6166	-0.11377	-0.031982	-0.26514	1.158	6.039	4.9735	0.20679	-0.053711	0.15479	-0.568999999999996	149.2383	578.0196	-0.5835	0.23096	-0.20557	13.6833	-55.11	1364.574	-1.9961	0.22559	-0.37402	-7.444	25.4677	23.3962	0.1626	-0.16211	0.027832
0.19	86.4089	-65.884	1565.817	-3.0601	1.2856	-0.37939	-19.573	21.283	1480.6072	-2.3398	0.84863	-0.64063	-10.096	-12.089	228.4873	-0.16406	-0.020508	-0.28516	-14.611	-6.39683	23.168	0.22656	-0.067871	0.15234	26.673	209.692	542.148	-0.54053	0.20068	-0.19775	45.4547	-91.657	1417.383	-2.0703	0.32324	-0.37939	28.107	22.6346	37.066	0.11743	-0.19775	0.028321
0.192	96.6091	38.2454	1567.121545	-3.0414	1.332	-0.37998	-3.859	62.413	1457.527	-2.2857	0.83223	-0.6455	-0.741999999999997	-5.15124	296.4798	-0.25244	0.00048828	-0.30908	-33.8665	44.57	13.4609	0.24756	-0.088867	0.15381	39.376	127.2126	511.9834	-0.52393	0.18506	-0.19043	78.8632	-52.612	1403.12	-2.187	0.51904	-0.39795	-15.405	32.0942	18.7784	0.077637	-0.12207	-0.0087891
0.194	80.38	-6.8771	1558.1962	-3.0148	1.3562	-0.38457	-30.448	53.786	1433.5088	-2.2366	0.81104	-0.64892	-5.186	68.687	357.082	-0.32789	0.019043	-0.32007	-39.3049	6.46709	10.406384	0.25977	-0.099609	0.1499	23.339	143.1899	466.0173	-0.47998	0.15723	-0.18164	32.925	-43.999	1376.1176	-2.2468	0.65014	-0.41089	-4.455	-2.2474	31.2811	0.12256	-0.059082	0.0073242
0.196	55.785	15.8075	1572.68	-2.9746	1.3473	-0.38887	29.06	22.455	1488.116	-2.1976	0.78525	-0.63799	-37.93	100.647	465.998	-0.41162	0.04248	-0.33154	-31.93	23.2902	19.63251	0.28027	-0.12305	0.13623	31.7537	161.42004	441.8305	-0.45801	0.13403	-0.17456	46.897	-84.7311	1396.323	-2.3022	0.76416	-0.42334	30.465	20.5855	28.9129	0.14355	-0.062988	0.02832
0.198	43.952	57.389	1536.3897	-2.9276	1.3268	-0.39453	63.091	68.205	1489.765	-2.1708	0.75674	-0.63369	22.924	99.223	582.0382	-0.54688	0.069336	-0.34863	-31.254	43.208	8.5891	0.29492	-0.1355	0.1333	47.021	114.807	420.88967	-0.43457	0.1167	-0.16846	-19.703	-44.5278	1373.132	-2.3633	0.89063	-0.45313	-12.553	5.24516	39.9131	0.15771	-0.065918	-0.00097656
0.2	22.087	-25.02	1536.5906	-2.8789	1.2871	-0.40234	4.693	4.192	1468.491	-2.1538	0.729	-0.62402	-37.928	96.692	637.622	-0.61816	0.088379	-0.35742	-40.9876	-11.6952	16.9592	0.30469	-0.1499	0.11768	55.1	180.744	363.6431	-0.40234	0.084961	-0.16504	-37.12912	-76.529	1409.14	-2.3921	0.9458	-0.44775	-0.687000000000005	-3.343	33.9156	0.15137	-0.076904	-0.021973
0.202	38.694	53.879	1542.693	-2.8239	1.2488	-0.40401	33.249	16.021	1450.4731	-2.1558	0.70039	-0.6082	-57.897	43.694	694.789	-0.76563	0.12256	-0.36035	-21.055	15.2593	15.1741	0.30957	-0.16748	0.11133	55.3844	145.53616	339.87	-0.38574	0.075684	-0.15234	22.019	-112.402	1491.3647	-2.4492	1.0117	-0.47852	2.572	25.7307	6.6913	0.14307	-0.07959	-0.022461
0.204	31.576	56.528	1510.80256	-2.7796	1.2032	-0.40566	17.891	68.635	1404.1554	-2.1589	0.67481	-0.58897	-9.293	35.011	788.751	-0.89307	0.14966	-0.35889	-32.5071	9.2389	-0.0350000000000001	0.31152	-0.1748	0.099609	48.492	118.143	329.414	-0.35791	0.049805	-0.14551	4.971	-76.145	1497.357	-2.4873	1.04	-0.50537	-8.167	14.2043	1.2229	0.13525	-0.074219	-0.020996
0.206	25.176	10.3102	1525.38	-2.7452	1.154	-0.40528	5.932	37.4408	1408.151	-2.1686	0.65918	-0.57334	-26.59	3.02800000000001	872.746	-1.0288	0.1875	-0.35059	-12.581	-4.156	11.4767	0.30664	-0.18359	0.08252	52.392	164.581	309.4495	-0.33521	0.032226	-0.14648	35.361	-135.324	1515.073	-2.5093	1.0493	-0.52002	32.306	17.5189	20.6698	0.13281	-0.064453	-0.02002
0.208	8.04600000000001	75.581	1493.277	-2.7227	1.1105	-0.40284	68.6399	91.3	1405.551	-2.1742	0.6498	-0.55625	24.339	-55.902	933.032	-1.2222	0.25146	-0.30811	-1.375	41.6508	0.3616	0.29736	-0.18896	0.069824	61.2693	117.721	309.8948	-0.31396	0.016602	-0.14453	52.997	-101.294	1493.909	-2.5327	1.0317	-0.54248	4.137	25.666	8.4301	0.13721	-0.044434	-0.038574
0.21	-24.468	-9.9853011	1460.7751	-2.7026	1.0767	-0.396	7.991	69.532	1351.462	-2.1816	0.65039	-0.5459	38.4	-62.049	898.758	-1.3296	0.2915	-0.27441	-9.205	12.5143	-18.9108	0.28906	-0.19189	0.061523	52.8874	148.903	273.8243	-0.2876	-0.00048828	-0.13525	37.427	-50.945	1463.706	-2.5327	1.0161	-0.54932	-2.625	-0.5398	9.706	0.14551	-0.029297	-0.04248
0.212	12.55	8.0563	1476.6678	-2.6923	1.0554	-0.38916	7.091	30.792	1322.152	-2.1813	0.65742	-0.53437	-4.244	-103.9	852.5529	-1.5996	0.39746	-0.2168	7.61499999999999	25.395	6.0575	0.26611	-0.18701	0.049805	46.2415	153.957	236.842	-0.27783	-0.012695	-0.1333	80.81203	-78.756	1501.966	-2.5171	0.99072	-0.56396	16.925	28.8421	6.5609	0.1543	-0.02832	-0.041016
0.214	-3.02	65.051	1453.5599	-2.6832	1.0516	-0.37812	4.935	74.057	1270.422	-2.1784	0.66904	-0.52412	50.801	-143.178	892.201	-1.847	0.50463	-0.18432	-1.796	50.14	-5.4506	0.24829	-0.18286	0.043213	19.776	95.564	227.125	-0.25	-0.03418	-0.12842	88.90169	-16.15	1459.13	-2.5	0.9668	-0.57568	-15.044	22.3393	1.2787	0.15967	-0.015137	-0.03418
0.216	-56.0994	14.565	1459.824	-2.6644	1.0562	-0.37227	-9.175	58.51434	1234.036	-2.1659	0.68154	-0.51162	18.6174	-123.658	909.743	-2.1108	0.63232	-0.16748	14.001	-4.7155	28.3341	0.22852	-0.17676	0.03125	15.626	152.887	190.535	-0.23096	-0.046631	-0.12573	40.8456	-58.379	1467.312	-2.4741	0.94482	-0.5874	-10.057	13.9115	28.9708	0.16113	-0.0039063	-0.034668
0.218	-42.855	93.3644	1437.094	-2.6325	1.0628	-0.37109	75.867	128.632	1241.7617	-2.1513	0.696	-0.50713	-5.6049	-122.437	968.5217	-2.4194	0.80908	-0.16553	20.225	20.8998	36.796	0.21289	-0.16113	0.01709	-2.702	132.442	184.0874	-0.21484	-0.058594	-0.12207	40.882	-87.925	1500.855	-2.4312	0.9126	-0.60059	5.241	25.994	21.3215	0.15967	0.0029297	-0.038574
0.22	-34.417	83.664	1382.398	-2.5854	1.061	-0.37939	52.278	182.976	1193.224	-2.123	0.70508	-0.49805	30.842	-115.962	988.99	-2.5308	0.88818	-0.18213	15.741	3.6339	20.8007	0.19238	-0.15088	0.013184	-18.442	104.9953	196.2645	-0.19629	-0.070801	-0.11426	-20.444	-5.061	1457.6559	-2.4102	0.90039	-0.60645	-24.687	-7.3314	6.6744	0.16064	0.018555	-0.039551
0.222	-12.456	40.649	1359.665	-2.5241	1.0497	-0.38096	41.316	131.97	1169.4746	-2.0906	0.71015	-0.48594	-29.6223	-132.213	990.85	-2.6084	1.0586	-0.2168	-8.911	-4.7613	22.8512	0.17725	-0.12744	0.0024414	-25.286	136.267	176.91915	-0.19043	-0.075195	-0.11523	-13.11	-9.8964	1442.467	-2.3569	0.87842	-0.61084	-7.806	7.68	10.3712	0.16357	0.023926	-0.041016
0.224	0.332999999999998	115.085	1323.2508	-2.4625	1.0297	-0.38125	80.0148	151.807	1164.162	-2.0526	0.70596	-0.47686	-27.0049	-185.665	1037.579	-2.5232	1.1712	-0.25366	13.732	53.139	-4.6951	0.16235	-0.10694	-0.0058594	-37.0321	82.9902	168.891501	-0.1665	-0.086426	-0.11377	15.526	39.62147	1438.1439	-2.3228	0.85059	-0.61133	-21.798	22.5193	-10.9858	0.16846	0.032715	-0.041016
0.226	-14.922	64.9806	1282.156	-2.3953	0.99688	-0.38047	34.229	123.007	1121.71029	-2.0163	0.70635	-0.46631	5.276	-161.0464	1054.207	-2.3574	1.2656	-0.29883	24.125	29.947	-11.4767	0.14551	-0.085449	-0.01709	-22.451	107.991	136.910026	-0.15113	-0.095703	-0.11181	-34.739	66.1061	1400.408	-2.2905	0.83057	-0.61768	-30.43031	-5.9879	3.10354	0.16553	0.035401	-0.043213
0.228	28.483	97.714	1260.3263	-2.3417	0.96338	-0.37237	54.4199	103.29916	1137.312	-1.9748	0.70449	-0.45664	25.8	-115.305	1060.352	-2.0781	1.3535	-0.37305	38.999	31.356	1.9143	0.13184	-0.056641	-0.031738	-36.5466	129.574	106.1476	-0.13623	-0.10742	-0.10742	-4.462	-7.041	1414.5986	-2.2534	0.80518	-0.61865	13.595	6.994856	6.6642	0.1582	0.041992	-0.04248
0.23	59.685	153.365	1228.75	-2.2944	0.93213	-0.36084	41.4559	158.7874	1102.316	-1.9272	0.69775	-0.44189	78.21078	-80.499	1110.964	-1.9409	1.3696	-0.40674	30.2896	44.396	-2.2581	0.12842	-0.045898	-0.037598	-37.646	79.576	110.1521	-0.11816	-0.11768	-0.104	-4.834	45.9052	1372.1347	-2.2324	0.78906	-0.62012	-23.869	-6.6796	2.0248	0.15576	0.049805	-0.042969
0.232	46.781	87.1843	1219.4742	-2.2399	0.89336	-0.35528	-25.7784	104.602	1071.528	-1.8764	0.68672	-0.42637	29.67	-55.545	1099.032	-1.7202	1.313	-0.47314	18.626	-9.3941	14.5786	0.11865	-0.015625	-0.04834	-39.265	127.09	93.135	-0.11133	-0.12158	-0.10645	7.219	32.807	1361.738	-2.2007	0.76807	-0.61865	2.429	-12.7626	10.19791	0.14746	0.054199	-0.040527
0.234	91.1949	151.603	1206.8732	-2.1856	0.86368	-0.34883	11.668	101.577	1035.31	-1.8285	0.67461	-0.41328	-4.691	-105.956	1086.576	-1.6109	1.1753	-0.50928	31.1978	30.9453	21.1204	0.11451	0.0024414	-0.059082	-39.769	106.875	81.4857	-0.094727	-0.13623	-0.10352	61.52	25.221	1426.203	-2.1745	0.75415	-0.62085	15.912	19.4361	8.8794	0.13965	0.061523	-0.033691
0.236	81.3868	135.215	1172.097	-2.1234	0.83672	-0.3457	-28.023	119.03	964.11292	-1.7797	0.66172	-0.39219	50.302	-159.0057	1113.365	-1.5391	0.97266	-0.52246	-3.356	26.0034	7.4788	0.11279	0.023438	-0.064941	-13.886	78.278	99.836	-0.081299	-0.1455	-0.10156	28.968	79.2706	1395.5383	-2.1504	0.74219	-0.62305	-43.4571	15.0995	1.49616	0.12622	0.065185	-0.029785
0.238	70.932	76.208	1158.6852	-2.0557	0.81338	-0.33975	-35.121	87.713	943.054	-1.7304	0.64424	-0.37451	27.7344	-171.3544	1150.835	-1.4839	0.66943	-0.51416	-15.534	9.5244	17.2205	0.10938	0.046387	-0.075684	-29.1168	114.724	92.983	-0.075684	-0.16211	-0.1001	30.624	12.735	1365.569	-2.1128	0.72168	-0.6167	2.662	29.264	10.0957	0.1167	0.073242	-0.026367
0.24	85.0811	151.399	1114.74	-1.9902	0.79297	-0.33545	13.595	159.1946	939.458	-1.6782	0.6333	-0.36279	18.823	-220.758	1250.0002	-1.4766	0.53516	-0.50391	3.624	55.281	9.124	0.10986	0.060059	-0.083984	-22.341	53.683	79.3456	-0.069824	-0.17041	-0.097168	46.362	24.9482	1349.36	-2.0918	0.71582	-0.61621	-0.881999999999998	45.054	-7.7242	0.094727	0.088867	-0.018066
0.242	49.513	100.323	1065.546	-1.9142	0.76865	-0.33174	-43.0451	153.372	896.398	-1.6241	0.63681	-0.34463	-32.111	-218.882	1289.323	-1.5034	0.29541	-0.48682	-18.845	33.033	8.2494	0.11035	0.079102	-0.091797	3.94600000000001	74.999	78.473	-0.066406	-0.17578	-0.094727	15.613	52.686	1330.3958	-2.0581	0.69971	-0.60791	-21.687	17.4005	-6.589	0.09082	0.093262	-0.015137
0.244	92.35118	109.729	1043.35	-1.8472	0.74697	-0.325	-40.6572	143.27	879.705	-1.5667	0.63721	-0.33174	-133.417	-206.776	1258.723	-1.5635	0.16626	-0.46851	-12.363	30.959	13.5409	0.11425	0.09375	-0.098634	-5.79	84.64	43.3456	-0.066406	-0.18799	-0.090332	55.788	15.937	1373.097	-2.0281	0.68774	-0.59937	22.196	32.136	6.5871	0.067871	0.10742	-0.0092773
0.246	93.56788	140.8252	999.014	-1.7835	0.72627	-0.32149	2.344	194.988	832.281	-1.5124	0.63603	-0.31221	-74.5779	-234.123	1281.4086	-1.6582	0.075684	-0.44531	-29.5685	40.816	11.1938	0.11719	0.10938	-0.10352	6.98	34.433	64.509	-0.068604	-0.18872	-0.082275	40.793	89.4257	1345.607	-2.0034	0.67236	-0.59326	-28.203	26.733	-2.1552	0.050781	0.11719	-0.0026856
0.248	57.058	78.049	983.877	-1.7178	0.70527	-0.32383	-7.865	164.197	814.6832	-1.4556	0.6292	-0.29541	-61.079	-176.71	1285.885	-1.8281	0.05127	-0.41406	-29.864	-6.60763	28.811	0.12207	0.12305	-0.10547	3.896	55.628	56.8764	-0.068359	-0.18994	-0.075195	-6.917	59.611	1296.961	-1.978	0.65674	-0.58643	8.353	12.0628	13.4621	0.032715	0.13135	0.0048828
0.25	64.765	150.158	968.3628	-1.6548	0.68408	-0.32178	19.51	200.116	802.9323	-1.4004	0.61426	-0.27734	-59.396	-143.371	1332.896	-1.9277	0.077148	-0.39844	-23.906	23.27894	29	0.12598	0.13135	-0.10645	14.789	21.1992	32.00862	-0.065918	-0.19287	-0.074219	23.791	20.713	1274.294	-1.9702	0.65479	-0.58105	28.047	48.447	-8.7893941	0.0073242	0.15137	0.016602
0.252	63.4417	159.471	929.0792	-1.5906	0.66406	-0.32227	-40.516	228.504	736.246	-1.3474	0.59961	-0.26094	21.534	-144.4976	1396.393	-2.125	0.21973	-0.37793	-22.442	13.1196	21.8503	0.12549	0.14111	-0.10791	43.2333	10.1455	50.451	-0.0625	-0.18848	-0.067871	-1.688	74.97772	1239.678	-1.9331	0.65186	-0.56592	-7.015	30.8387	-9.0019	-0.0043945	0.15918	0.020996
0.254	68.932	140.585	921.3085	-1.5208	0.6415	-0.31845	-80.982	198.163	701.936	-1.2952	0.58506	-0.24941	11.23	-86.127	1378.767	-2.2547	0.37891	-0.39038	-25.34	-11.7304	15.7107	0.125	0.14966	-0.1106	42.1756	51.329	24.3828	-0.058105	-0.18896	-0.059082	12.553	40.2592	1220.1298	-1.9014	0.64795	-0.5542	21.293	26.353	11.0392	-0.030762	0.17969	0.032227
0.256	59.737	213.702	881.205	-1.4532	0.61689	-0.31689	-19.4007	234.59	662.4627	-1.2389	0.57256	-0.22676	18.771	-108.476	1388.987	-2.3647	0.54736	-0.396	-31.764	30.669	12.6164	0.12598	0.16016	-0.11621	36.34873	5.56812	31.614	-0.057861	-0.1814	-0.053955	77.0735	109.881	1178.2	-1.8672	0.6377	-0.54248	11.436	30.093	-16.67081	-0.05542	0.19824	0.040039
0.258	27.351	143.725	832.5445	-1.3843	0.58916	-0.31201	-59.0961	188.4982	649.0832	-1.1845	0.55928	-0.2126	64.4961	-104.622	1397.5352	-2.4683	0.77588	-0.41162	-23.3328	6.6462	17.7865	0.12549	0.16846	-0.11133	34.779	27.426	29.896	-0.050293	-0.1792	-0.051758	63.6995	146.687	1134.5605	-1.8159	0.61816	-0.53662	-4.973	7.1233	3.053	-0.073242	0.21289	0.055664
0.26	16.092	146.114	806.0834	-1.3184	0.56445	-0.30762	-33.624	147.8365	639.3703	-1.1304	0.54053	-0.20264	74.075	-50.055	1379.7998	-2.5054	0.88525	-0.42529	-17.824	19.53188	20.00912	0.12451	0.17236	-0.11475	29.034	16.4946	12.8352	-0.04248	-0.16748	-0.046387	69.0072	89.839	1135.4483	-1.7852	0.60742	-0.53516	29.892	31.353	17.7804	-0.10107	0.23242	0.055176
0.262	8.34	183.586	743.3058	-1.25	0.53408	-0.30039	-28.506	173.926	585.72483	-1.078	0.52002	-0.1874	93.576	-62.797	1399.9671	-2.5469	1.0723	-0.45117	-0.855999999999998	48.003	13.7087	0.12158	0.18115	-0.1123	38.301	-20.947	32.6859	-0.037109	-0.16553	-0.041992	49.344	155.202	1108.22	-1.7319	0.59619	-0.51709	-13.607	29.8521	49.936	-0.11377	0.23975	0.056641
0.264	-8.709	126.70575	731.845	-1.1852	0.50703	-0.29199	-54.873	130.062	560.015398	-1.0206	0.49658	-0.17324	50.198	-1.79199999999999	1370.37	-2.5515	1.176	-0.48438	-5.701	-2.0192	18.6912	0.11792	0.1853	-0.11206	17.263	18.8009	21.635	-0.02832	-0.1543	-0.032715	32.073	128.452	1100.3355	-1.6953	0.58936	-0.50586	-13.769	-18.9142	105.0987	-0.14648	0.25488	0.04541
0.266	-1.421	204.539	702.5929	-1.1145	0.48399	-0.28418	-5.643	148.622	544.926	-0.96943	0.46611	-0.16269	-5.024	0.0440000000000005	1367.841	-2.5459	1.248	-0.51953	-11.092	20.8021	34.1392	0.10938	0.19141	-0.10889	16.224	11.0174	11.3146	-0.024903	-0.14599	-0.031982	75.6891	101.0394	1103.8175	-1.6543	0.58203	-0.49219	20.004	-18.4184	132.8064	-0.17749	0.26392	0.029541
0.268	-1.92599999999999	207.558	659.4441	-1.0567	0.46094	-0.28076	-13.54	164.312	517.1979	-0.92549	0.44053	-0.15098	53.06	-67.537	1446.741	-2.5117	1.2793	-0.56738	-3.561	21.7993	11.5746	0.09668	0.20117	-0.10498	15.058	4.995	18.8683	-0.017578	-0.146	-0.023926	10.043	145.74	1087.071	-1.6074	0.58203	-0.47607	-10.017	-15.6065	147.661	-0.22021	0.27979	0.013184
0.27	-23.162	159.74312	637.135	-0.99023	0.44531	-0.2666	3.272	127.975	504.9989	-0.88135	0.41895	-0.14014	61.739	-38.9589	1462.5464	-2.4819	1.2729	-0.58496	13.495	3.6902	17.7968	0.093262	0.21045	-0.1001	-16.388	36.651	6.6873	-0.010742	-0.13965	-0.019043	-22.251	82.269	1061.897	-1.5757	0.58447	-0.46826	-12.27	16.94694	208.559	-0.30127	0.30127	-0.0058594
0.272	-7.86	206.583	611.722	-0.92841	0.42002	-0.26064	49.46756	184.661	471.345	-0.8376	0.40127	-0.13271	79.927	-94.906	1481.353	-2.4136	1.2056	-0.60889	30.2388	34.369	19.0907	0.080566	0.22021	-0.094238	-12.291	-11.7457	4.8456	-0.0048828	-0.13818	-0.013184	-0.985999999999997	104.931	1001.486	-1.519	0.58643	-0.45947	-48.0764	38.3996	281.0371	-0.35059	0.31299	-0.016602
0.274	-7.704	129.89577	587.8497	-0.8709	0.39961	-0.25449	-9.124	166.999	431.165	-0.79492	0.38702	-0.12304	117.678	-88.29	1479.188	-2.3611	1.1311	-0.62256	8.223	-6.0616	3.8247	0.074707	0.23023	-0.09375	-13.535	-0.38334	13.2446	0.00097656	-0.13135	-0.0087891	-25.34	132.5576	939.9668	-1.4692	0.58129	-0.43018	-81.277	-26.811	383.796	-0.47314	0.32568	-0.024902
0.276	4.159	147.888	567.355	-0.81231	0.38047	-0.24629	-16.3438	143.083	432.044	-0.75117	0.36826	-0.11445	86.336	-23.088	1458.657	-2.3027	1.041	-0.63281	20.062	5.3633	21.6935	0.06543	0.23877	-0.087402	-32.1273	-0.5627	-0.7607	0.005127	-0.13745	-0.0085449	-9.502	91.184	925.406	-1.4253	0.56885	-0.41016	-69.4367	-47.71	434.796	-0.5918	0.33178	-0.033204
0.278	16.392	184.989	518.03	-0.75948	0.35488	-0.23662	-15.0111	187.431	398.348	-0.70284	0.35029	-0.10928	146.305	-80.09452	1471.145	-2.2476	0.92627	-0.63232	32.211	34.383	-13.6827	0.057617	0.25342	-0.080078	-33.4604	-28.384	12.441	0.0097656	-0.1377	-0.0063477	-26.723	150.504	893.668	-1.3667	0.55029	-0.38525	-106.426	-79.643	453.0268	-0.72656	0.34033	-0.041992
0.28	18.412	119.3526	496.406	-0.70654	0.33252	-0.22754	-37.1332	148.171	369.0508	-0.65625	0.33691	-0.10498	150.059	-30.388	1459.79368	-2.2227	0.875	-0.63672	22.836	-6.14919	1.5437	0.055176	0.26123	-0.07666	-31.9182	26.9738	6.5957	0.013184	-0.13916	-0.0024414	-30.0617	131.624	892.2521	-1.3433	0.54346	-0.36963	-78.151	-109.638	504.805	-0.92969	0.35156	-0.047363
0.282	47.332	175.407	458.739	-0.65391	0.3086	-0.21836	15.2816	161.087	340.049	-0.61074	0.32012	-0.097852	113.851	-42.603	1449.4106	-2.1831	0.7876	-0.63672	22.606	17.3948	31.2004	0.048828	0.27441	-0.075195	-44.0089	3.3802	-8.6252	0.019043	-0.13867	-0.00048828	10.039	111.1706	885.417	-1.2964	0.52783	-0.34619	-36.5865	-56.259	550.285	-1.04	0.35449	-0.044922
0.284	35.731	152.223	427.1401	-0.60683	0.28086	-0.20703	-21.1321	138.4117	288.796	-0.56201	0.30166	-0.096777	126.549	-94.7323	1506.307	-2.1655	0.74854	-0.63428	2.411	-21.5669	59.1205	0.045898	0.27857	-0.070801	-37.576	1.4138	0.0737000000000005	0.022461	-0.13867	0.00097656	9.347	183.492	856.898	-1.2635	0.52173	-0.33033	-41.107	-31.641	590.053	-1.2573	0.36768	-0.043457
0.286	46.707	133.1386	421.6071	-0.56191	0.25078	-0.19375	-58.181	91.102	276.2033	-0.52022	0.28838	-0.090918	38.624	-3.554	1469.135	-2.1558	0.72607	-0.63232	17.526	-55.8183	92.0068	0.036621	0.28809	-0.07666	-32.378	35.1864	6.27325	0.027587	-0.13916	-0.0029297	6.083	133.413	852.739	-1.2241	0.52393	-0.31494	40.716	-10.5466	614.006	-1.4158	0.3916	-0.048096
0.288	65.2967	201.092	387.933	-0.5164	0.22363	-0.18809	-36.9113	139.559	246.9755	-0.47744	0.27666	-0.081934	23.598	-3.54224	1444.185	-2.146	0.72119	-0.63379	8.601	-5.944	122.7684	0.018555	0.28906	-0.086426	-43.1763	-7.0489	12.6172	0.029297	-0.13721	-0.0053711	14.382	172.186	811.558	-1.1616	0.51807	-0.2959	30.704	-1.329	636.084	-1.5698	0.42529	-0.062012
0.29	56.1132	122.5657	382.25	-0.47119	0.19287	-0.18115	-43.5768	123.229	219.1595	-0.44287	0.26123	-0.076172	55.045	40.40952	1431.4648	-2.1426	0.72656	-0.63477	-13.3255	-0.2722	185.92	0.0092773	0.29248	-0.094727	-16.943	28.745	7.4098	0.033691	-0.13574	-0.003418	-33.1068	198.436	735.9285	-1.1235	0.51367	-0.28125	-27.005	-37.9424	693.795	-1.7461	0.49316	-0.085938
0.292	67.975	123.477	350.68	-0.4293	0.16504	-0.17207	7.618	108.447	225.359	-0.40655	0.24697	-0.067578	11.331	84.315	1393.8499	-2.1426	0.74414	-0.63721	-24.89	11.5166	268.954	-0.029297	0.29785	-0.11133	-38.0614	38.222	-7.3369	0.03418	-0.12939	-0.0029297	-45.0475	142.034	711.3506	-1.0591	0.50146	-0.26172	0.878999999999998	-21.578	737.244	-1.8262	0.53516	-0.10596
0.294	68.0652	129.2434	282.454	-0.38593	0.13848	-0.1666	-15.68	119.692	201.18	-0.37129	0.23828	-0.059864	24.679	-7.85	1415.9776	-2.144	0.76611	-0.6355	-41.684	30.04827	323.592	-0.067383	0.30175	-0.13159	-17.428	0.3917	5.7763	0.030762	-0.12061	-0.0019531	-63.652	204.255	665.8883	-1.0015	0.48096	-0.24512	2.48	-11.9449	769.672	-1.9395	0.64844	-0.14795
0.296	80.7306	77.341	268.5391	-0.34765	0.10527	-0.16191	-45.473	76.767	184.6268	-0.33808	0.22695	-0.056348	5.082	25.028	1381.0281	-2.1465	0.78711	-0.63477	-104.572	-25.2417	429.066	-0.12891	0.30859	-0.1416	-1.073	40.54	5.4201	0.024658	-0.11719	0.0024414	-42.0697	166.902	667.8633	-0.96631	0.47217	-0.22607	69.3622	-23.901	808.268	-1.9712	0.73975	-0.17798
0.298	79.4643	132.252	236.9966	-0.30703	0.077539	-0.15489	-0.645	110.822	182.934	-0.30576	0.21787	-0.051953	-13.549	44.012	1372.484	-2.1382	0.80713	-0.62646	-122.582	-8.885	544.5978	-0.2334	0.32178	-0.17529	-8.671	8.1143	-6.0653	0.012695	-0.11621	0.0078125	2.441	137.546	655.4977	-0.92188	0.45508	-0.2085	73.935	-16.506	838.282	-1.9629	0.82227	-0.20801
0.3	60.1553	108.6024	223.057	-0.26611	0.050781	-0.14404	-41.391	131.288	158.9551	-0.27393	0.20557	-0.048828	33.645	27.1657	1413.471	-2.1289	0.81055	-0.625	-126.071	-24.302	607.659	-0.29492	0.32617	-0.18457	9.43	10.5006	-9.7896	0.00097656	-0.10938	0.029297	-15.369	179.966	593.31824	-0.88745	0.43726	-0.18799	24.153	-56.454	846.475	-1.8999	0.9126	-0.25391
0.302	44.684	99.7723	218.4314	-0.23272	0.024219	-0.13838	-35.51289	83.1421	175.008	-0.24658	0.2	-0.048828	24.967	105.98	1380.5393	-2.1069	0.81104	-0.61572	-141.293	-28.11	664.293	-0.43945	0.33545	-0.20508	24.782	54.55	-7.32086	-0.018066	-0.10303	0.028809	-23.5452	125.757	589.4995	-0.85498	0.43115	-0.17334	48.026	-97.318	853.619	-1.8418	0.94141	-0.27197
0.304	63.1415	162.539	202.889	-0.20361	0.00097658	-0.13467	-29.3844	86.1717	143.802	-0.22324	0.19102	-0.042969	26.474	46.608	1342.978	-2.0869	0.79736	-0.60937	-87.475	20.919	688.747	-0.57105	0.34986	-0.22119	18.181	27.071	7.701	-0.036621	-0.09375	0.026855	-3.825	157.9038	548.0199	-0.81494	0.4165	-0.15771	58.682	-97.022	876.924	-1.707	0.96094	-0.30664
0.306	65.61226	99.7213	196.2275	-0.17822	-0.018164	-0.1292	-77.389	48.217	103.223	-0.20176	0.18515	-0.039844	48.937	26.357	1330.4026	-2.0659	0.77881	-0.59717	-47.9634	-23.244	718.1894	-0.7168	0.36719	-0.23242	22.299	47.772	8.761	-0.044922	-0.077637	0.026856	10.7147	167.291	522.7472	-0.78564	0.41113	-0.14893	67.4826	-141.0759	900.573	-1.6045	0.9336	-0.33301
0.308	66.417	106.536	185.636	-0.15566	-0.035742	-0.1248	-24.263	43.998	88.561	-0.18183	0.18438	-0.035352	24.895	63.798	1318.8965	-2.0449	0.75195	-0.58789	-39.925	-45.00828	765.4128	-0.92773	0.40234	-0.2334	46.88615	46.708	-9.0116	-0.049805	-0.064453	0.017578	38.37956	128.812	514.8327	-0.74023	0.39453	-0.14014	133.153	-170.6133	955.1115	-1.5151	0.87354	-0.34521
0.31	9.631	109.857	148.7606	-0.13086	-0.05127	-0.11816	-2.865	88.133	54.838	-0.16162	0.18213	-0.036133	18.75	5.88	1333.4774	-2.0371	0.73438	-0.58203	-15.451	1.969	757.24888	-1.0425	0.42041	-0.23584	46.9377	10.8054	4.3604	-0.041016	-0.046875	0.015625	7.497	169.347	465.9621	-0.69849	0.3855	-0.13159	99.2019	-188.4974	956.647	-1.4219	0.75	-0.34961
0.312	-21.944	59.444	126.501	-0.11241	-0.064551	-0.11269	-26.644	53.533	82.0028	-0.13847	0.18037	-0.031933	42.28	62.258	1325.165	-2.0093	0.71338	-0.56396	-4.527	-22.873	795.7497	-1.2637	0.44531	-0.23633	33.175	53.314	13.8675	-0.03003	-0.031739	0.010987	-5.975	147.81	452.8064	-0.6543	0.36914	-0.12012	87.08	-241.32	994.368	-1.395	0.68213	-0.35205
0.314	-10.523	102.867	121.54868	-0.099119	-0.076856	-0.1083	9.387	62.341	64.897	-0.11904	0.18193	-0.02666	24.223	55.835	1291.383	-1.9841	0.69947	-0.55298	19.257	9.60031	828.719	-1.4316	0.4624	-0.23657	16.5852	20.7611	13.156	-0.02002	-0.016113	0.0029297	7.59	130.8064	437.514	-0.59375	0.34766	-0.1084	84.612	-216.7232	1047.345	-1.3672	0.5415	-0.35352
0.316	-30.3481	78.3527	106.8612	-0.081153	-0.082715	-0.099317	-20.484	56.5226	24.046	-0.095996	0.17959	-0.019238	32.429	-15.642	1272.472	-1.9609	0.6875	-0.54834	16.964	-10.6787	802.282	-1.5889	0.48242	-0.24121	29.983	21.462	40.4773	-0.0068359	0.0063477	-0.003418	-35.6507	186.051	401.4237	-0.56787	0.33252	-0.10303	26.737	-209.2214	1101.5028	-1.3736	0.46191	-0.34399
0.318	-12.15	53.8396	111.3172	-0.066016	-0.087598	-0.094239	10.256	25.797	35.4158	-0.074609	0.17724	-0.018164	29.412	65.28	1223.246	-1.9224	0.67334	-0.53076	7.076	-74.586	822.378	-1.8164	0.55859	-0.26953	28.157	64.665	11.56243	0.003418	0.020508	-0.015137	-20.9553	120.0502	409.367285	-0.52002	0.30518	-0.087891	53.783	-224.315	1206.223	-1.4019	0.40088	-0.33643
0.32	-33.251	92.048	82.77916	-0.047363	-0.091797	-0.095703	57.86927	59.44	42.648	-0.053711	0.1709	-0.01709	35.911	44.165	1180.677	-1.9038	0.67041	-0.52441	47.579	-78.291	836.51	-1.9233	0.61279	-0.28564	0.103999999999999	10.9878	18.00554	0.011719	0.039551	-0.01709	-4.215	130.549	370.2981	-0.48731	0.28711	-0.079102	37.081	-184.846	1213.7996	-1.4785	0.36914	-0.32324
0.322	-41.376	39.8371	73.2576	-0.032617	-0.094922	-0.086719	10.02	34.1171	48.0225	-0.028418	0.16865	-0.013183	92.1002	96.283	1168.176	-1.8633	0.66992	-0.50781	14.12	-100.257	869.0626	-2.0859	0.76367	-0.29102	4.171	40.908	13.3666	0.020752	0.050782	-0.021485	-40.16	137.0503	321.6951	-0.45703	0.26758	-0.068848	-6.2779	-185.216	1220.7941	-1.5352	0.38086	-0.31641
0.324	-34.313	76.732	79.7332	-0.015332	-0.095801	-0.076075	24.71	36.7485	41.76513	-0.0085933	0.15879	-0.012598	89.5437	156.114	1117.615	-1.8281	0.67773	-0.49512	12.19	-87.097	918.46719	-2.1533	0.8916	-0.28223	-8.533	50.729	0.36994	0.028809	0.057617	-0.03125	-12.868	75.221	285.9816	-0.42529	0.24756	-0.059082	28.9137	-171.78	1232.4109	-1.6704	0.43604	-0.31006
0.326	-40.2749	84.267	62.7314	-0.00087891	-0.099709	-0.080371	20.576	67.793	-11.7023	0.012109	0.1502	-0.011035	99.773	75.3966	1114.1116	-1.791	0.68262	-0.47754	57.145	-60.249	919.633	-2.1875	1.0156	-0.2832	-7.049	8.1249	35.421	0.026367	0.063477	-0.038086	-27.996	140.112	252.760047	-0.41357	0.23291	-0.04834	-32.363	-126.183	1244.0913	-1.7925	0.51123	-0.30567
0.328	-15.298	22.0915	74.92972	0.011523	-0.10234	-0.077734	-13.461	23.2628	10.4947	0.036035	0.13682	-0.011231	89.9175	128.546	1086.0813	-1.7378	0.6958	-0.46436	56.508	-121.255	917.655	-2.1577	1.1841	-0.28369	-14.988	41.1955	28.93	0.027344	0.066406	-0.03418	-28.1086	121.177	245.9956	-0.3877	0.21484	-0.031738	-12.596	-131.807	1283.56056	-1.9136	0.6001	-0.30957
0.33	-26.548	55.588	52.5127	0.027832	-0.10205	-0.074707	20.19	28.8969	35.2658	0.05957	0.12598	-0.0083008	90.6814	136.484	1048.591	-1.707	0.6875	-0.45898	98.0864	-153.396	943.0493	-2.1177	1.2524	-0.29248	-29.3955	-5.0929	31.702	0.027344	0.069824	-0.040527	-0.686	105.278	223.744	-0.37329	0.20484	-0.02417	16.335	-98.02	1312.2251	-2.0703	0.73828	-0.31934
0.332	-29.5939	34.1219	33.1826	0.038282	-0.10264	-0.071875	7.081	17.9307	14.679	0.073437	0.11572	-0.0088867	118.6909	104.602	1059.847	-1.646	0.69775	-0.43994	101.145	-176.0971	957.3886	-2	1.3574	-0.30273	-32.744	-6.3678	40.521	0.025147	0.072754	-0.04126	-38.9252	154.635	202.73881	-0.35938	0.19336	-0.013672	-15.394	-72.282	1315.52149	-2.1465	0.79492	-0.31982
0.334	-27.442	29.8062	41.7519	0.054101	-0.10391	-0.067871	11.573	1.543	14.368	0.093261	0.1043	-0.0087891	82.2303	186.48	1025.5131	-1.5991	0.69336	-0.427	97.226	-220.209	1008.9232	-1.9008	1.3819	-0.30616	-31.26	40.1323	22.7344	0.021973	0.070313	-0.049316	-27.6888	97.414	209.7278	-0.33496	0.19287	-0.0053711	11.856	-89.11543	1363.09	-2.2788	0.92041	-0.32373
0.336	-16.716	74.319	35.1471	0.066601	-0.11093	-0.067871	41.2949	16.67215	9.878	0.10849	0.096875	-0.0095703	36.813	125.984	1015.75479	-1.5547	0.68945	-0.40576	117.034	-205.9776	1083.849	-1.8159	1.3579	-0.30615	-45.7793	14.71229	21.3879	0.027344	0.068359	-0.051758	-21.6605	136.419	214.319	-0.32715	0.19141	-0.0019531	-5.946	-38.56	1380.4403	-2.367	1.0037	-0.33667
0.338	-18.305	38.427	31.594	0.075	-0.11211	-0.068652	-6.208	-21.6709	1.8442	0.12236	0.082813	-0.011816	38.149	135.403	985.483	-1.4878	0.67334	-0.3833	62.1095	-225.122	1096.19	-1.7476	1.2407	-0.30371	-51.4938	41.617	29.5154	0.027832	0.068359	-0.053711	-66.486	144.244	201.3457	-0.30371	0.18994	0.012207	-45.634	-29.667	1390.476	-2.4487	1.0835	-0.34717
0.34	11.781	57.818	31.5685	0.089844	-0.11719	-0.067871	14.201	-10.515	24.8863	0.13477	0.071289	-0.010254	11.477	166.0899	945.6453	-1.4423	0.66064	-0.37305	24.604	-263.078	1165.148	-1.7422	1.1543	-0.30664	-32.1883	34.724	13.4251	0.025879	0.062012	-0.068359	-31.7713	94.4544	187.2469	-0.28199	0.18676	0.023193	-20.441	-59.516	1432.337	-2.5503	1.1763	-0.35303
0.342	34.94481	46.715	22.8264	0.096875	-0.121	-0.065332	16.155	22.1006	-4.7695	0.14394	0.059179	-0.0061521	7.966	94.102	915.072	-1.396	0.65186	-0.3584	19.787	-221.998	1188.785	-1.75	0.97461	-0.28809	-23.126	-17.706	27.125	0.035401	0.05957	-0.074952	-50.74474	125.35	133.9037	-0.2666	0.18213	0.03125	-57.944	-33.948	1446.40092	-2.5913	1.2231	-0.35449
0.344	29.6084	-3.47441	30.5203	0.1042	-0.12549	-0.066211	7.88	28.815	-12.202	0.15254	0.049511	-0.0035152	6.586	152.409	868.786	-1.3379	0.63574	-0.33398	-31.1909	-232.977	1227.555	-1.7983	0.85498	-0.26953	-22.586	7.2098	22.8769	0.04541	0.055664	-0.083984	-42.706127	80.5106	127.298	-0.23047	0.17285	0.033691	-42.694	-82.541	1496.774	-2.6782	1.2993	-0.36182
0.346	32.795	29.4627	36.6649	0.11318	-0.12354	-0.054101	30.12	58.343	29.439	0.15918	0.037011	0.005079	-20.027	143.111	828.766	-1.3062	0.6333	-0.31982	-22.779	-195.1531	1283.258	-1.873	0.76367	-0.25342	-17.113	-20.45655	19.8013	0.051758	0.05127	-0.098145	-27.545	62.921	114.282	-0.21094	0.16992	0.041504	33.839	-87.4488	1553.411	-2.7275	1.3418	-0.36352
0.348	32.298	3.6232	6.7934	0.12002	-0.12862	-0.059375	-62.393	47.415	16.5979	0.16953	0.02412	0.007325	-4.40799999999999	109.24283	838.7683	-1.2422	0.61523	-0.2998	-31.2836	-134.251	1295.4232	-1.9956	0.6958	-0.24512	-24.092	-18.8907	23.481	0.056641	0.048828	-0.10645	-35.4457	108.881	104.432	-0.17822	0.15625	0.039551	-8.661	-57.8573	1557.195	-2.7617	1.3789	-0.36523
0.35	45.76	5.1605	8.293	0.12744	-0.12842	-0.054199	-44.4284	22.28476	37.159	0.17432	0.012695	0.025391	-17.768	188.915	817.383	-1.1989	0.60035	-0.28321	-58.798	-144.912	1325.621	-2.0703	0.68359	-0.2373	-6.739	25.2914	5.2203	0.061523	0.046387	-0.11621	8.778	52.919	110.4662	-0.15258	0.14429	0.043457	13.611	-91.647	1572.18933	-2.7886	1.4009	-0.36279
0.352	48.4685	42.5487	6.8681	0.13594	-0.13027	-0.052734	-13.264	40.2996	34.276	0.17685	0.0010754	0.02998	-11.341	150.28	797.84	-1.1543	0.58496	-0.26855	-29.657	-109.818	1377.605	-2.23	0.70947	-0.23193	-6.585	-8.2105	8.6878	0.068115	0.048339	-0.12964	-2.217	60.833	103.374	-0.12598	0.13135	0.04541	21.217	-39.152	1540.6448	-2.7969	1.4082	-0.35791
0.354	36.631	-1.7931	18.2094	0.14375	-0.13096	-0.051075	-50.9519	13.487	13.4161	0.18476	-0.010641	0.038475	17.071	184.185	779.334	-1.0952	0.56299	-0.23877	-23.521	-94.986	1366.8599	-2.3784	0.78564	-0.2417	8.114	15.7529	9.2083	0.074219	0.05127	-0.14111	-26.543	66.41	85.304	-0.104	0.11621	0.049805	-5.18	-33.9934	1523.3939	-2.814	1.4087	-0.3501
0.356	28.366	21.13307	31.0989	0.15156	-0.13135	-0.049903	-3.535	14.074	35.435	0.19297	-0.027046	0.047848	-31.232	231.932	726.7093	-1.0718	0.55127	-0.23242	-17.553	-126.5637	1406.5887	-2.4487	0.83447	-0.25	18.8673	30.158	12.51634	0.078125	0.05127	-0.15137	7.172	17.795	69.8276	-0.094727	0.11133	0.055176	57.3554	-55.06	1553.026	-2.8184	1.4082	-0.34131
0.358	29.2566	30.1756	6.7688	0.15713	-0.13037	-0.049317	-27.5544	20.7985	-2.31937	0.20127	-0.037987	0.051171	-62.3575	177.358	699.689	-1.0181	0.52979	-0.20654	-26.809	-55.711	1401.9736	-2.5522	0.9458	-0.28223	7.324	-17.4173	28.0187	0.079102	0.050293	-0.15723	23.598	77.103	49.5464	-0.07666	0.094727	0.062988	44.291	11.7394	1531.815	-2.8296	1.4028	-0.32227
0.36	9.045	-3.5884	28.0801	0.16113	-0.12891	-0.046387	-50.8395	17.5397	-24.5512	0.21094	-0.049316	0.057129	-91.345	242.022	652.9517	-0.97827	0.51611	-0.1936	-75.235	-51.469	1401.196	-2.604	1.0259	-0.30883	33.066	10.76745	31.5315	0.077637	0.049805	-0.17725	13.451	51.805	50.1728	-0.06543	0.088379	0.069824	47.251	-11.782	1543.88	-2.8398	1.3906	-0.31152
0.362	3.027	29.0478	24.689	0.16386	-0.125	-0.042383	14.551	33.13705	10.6078	0.22178	-0.059382	0.059082	-76.336	213.681	645.952	-0.93848	0.50391	-0.17969	-39.036	-58.06	1464.5329	-2.644	1.1021	-0.33643	15.683	-37.1157	36.1962	0.075195	0.051514	-0.19385	22.394	31.532	53.5432	-0.054688	0.07959	0.074707	60.1444	-1.55731	1554.032	-2.853	1.3852	-0.2976
0.364	1.84	8.51529	11.4394	0.16807	-0.12363	-0.0333	-4.855	18.12146	17.137	0.23399	-0.074042	0.058102	-3.35	147.568	620.312	-0.87256	0.48389	-0.16992	-50.3428	-45.545	1464.9878	-2.6738	1.1895	-0.36719	30.071	-61.26	54.6459	0.071289	0.057129	-0.20898	-8.432	65.352	23.3156	-0.044922	0.065918	0.078613	-11.231	48.367	1521.8419	-2.8608	1.3813	-0.28369
0.366	-2.986	4.36329	7.2852	0.16494	-0.11933	-0.029395	-5.606	-0.122	49.569	0.24533	-0.088876	0.055761	-40.8021	179.8983	569.29115	-0.83887	0.47266	-0.16455	-83.9847	-120.7799	1496.1667	-2.6895	1.2266	-0.38672	36.0095	-31.406	37.696	0.058105	0.061523	-0.22998	-1.022	9.6129	25.553	-0.030762	0.058105	0.082031	7.403	26.6437	1531.894	-2.8574	1.373	-0.26855
0.368	-2.495	41.435	5.7594	0.15947	-0.11104	-0.024609	16.218	17.5044	38.8917	0.25059	-0.10139	0.051565	-40.401	129.9485	555.9474	-0.76758	0.4502	-0.15479	-35.344	-109.5318	1532.788	-2.6992	1.2871	-0.40283	10.833	-54.725	63.403	0.047363	0.068848	-0.2373	25.91	39.6589	26.4019	-0.013672	0.047363	0.087402	51.288	93.172	1518.636	-2.8491	1.3696	-0.26074
0.37	-21.954	13.12254	25.396	0.15527	-0.10742	-0.02002	-21.954	6.3441	24.7726	0.25537	-0.11426	0.04541	-14.151	171.697	522.496	-0.71387	0.42334	-0.14526	-35.3281	-74.2984	1540.299	-2.6943	1.3086	-0.42481	30.921	-21.016	107.092	0.015625	0.081055	-0.25537	-6.515	51.601	28.107	0.0031738	0.037354	0.089355	27.977	103.109	1501.015	-2.8223	1.3477	-0.25391
0.372	-22.99	35.597	26.499	0.14707	-0.10283	-0.021386	0.923999999999999	21.9413	46.54	0.26299	-0.12557	0.041409	-4.497	199.111	498.699	-0.66357	0.39404	-0.13916	-18.8812	-81.466	1562.987	-2.6875	1.3184	-0.43066	34.138	7.09	118.156	-0.027588	0.088379	-0.26978	22.624	8.31455	34.3705	0.024414	0.025391	0.091309	36.793	52.54	1536.803	-2.7868	1.3303	-0.24414
0.374	-49.789	32.8897	9.0513	0.13974	-0.09834	-0.0084961	19.797	18.5804	27.7426	0.26153	-0.14059	0.029785	40.69792	134.751	492.6341	-0.60303	0.35498	-0.12988	33.9758	-10.0451	1549.592	-2.6699	1.3047	-0.43164	25.359	-41.849	171.652	-0.07959	0.10156	-0.2832	9.874	39.972	4.1632	0.04541	0.013184	0.07959	0.872	78.843	1502.013	-2.7485	1.3101	-0.24072
0.376	-53.8621	-3.225	4.5633	0.12998	-0.093652	0.0012695	-6.77	-0.1283	17.0796	0.2557	-0.15075	0.02591	42.3952	167.339	451.0128	-0.57373	0.33447	-0.12207	24.923	-32.405	1513.5207	-2.6597	1.2954	-0.43115	24.871	0.2578	251.9091	-0.16748	0.11475	-0.30566	-2.2201	-5.507	1.3191	0.062988	0.0048828	0.084473	-7.286	9.406	1485.2541	-2.6875	1.2695	-0.23828
0.378	-23.01	29.8065	12.8489	0.12051	-0.088086	0.0041992	14.493	6.9342	13.0409	0.24554	-0.16266	0.022474	18.3203	140.259	454.619	-0.52344	0.30273	-0.10449	57.4604	-52.1393	1556.95	-2.6421	1.2681	-0.42676	2.10299999999999	31.25242	374.858	-0.22803	0.11768	-0.33154	10.845	-30.311	17.5057	0.089355	-0.00097656	0.087402	10.04	-6.6563	1510.258	-2.6523	1.2539	-0.23486
0.38	-41.8649	7.5061	10.2938	0.10156	-0.084961	0.0092773	-3.895	33.973	-7.319	0.23047	-0.16846	0.020508	45.1771	116.313	443.525	-0.49511	0.27856	-0.093261	60.1089	-3.596	1529.763	-2.6363	1.2398	-0.42578	-3.112	60.4988	524.021	-0.34863	0.13965	-0.36475	-11.844	13.1361	10.2569	0.11158	-0.013672	0.087646	-18.941	41.332	1476.3663	-2.5835	1.2192	-0.22998
0.382	-30.675	-2.121	22.06399	0.083496	-0.077051	0.014941	29.078	22.2814	30.80744	0.21293	-0.17459	0.015685	12.985	172.084	399.181	-0.46826	0.2583	-0.074707	24.83779	-39.8994	1496.898	-2.6284	1.2202	-0.41748	-11.844	115.502	613.458	-0.45459	0.15991	-0.38794	8.174	-17.6188	7.3504	0.12891	-0.027832	0.09082	-14.644	-5.733	1486.1057	-2.5274	1.1924	-0.22753
0.384	-30.7587	37.1058	12.301	0.062891	-0.066602	0.018359	50.3399	31.952	32.20917	0.19302	-0.17762	0.011539	-3.206	122.687	383.887	-0.43799	0.23584	-0.05957	56.1037	-6.282	1520.6732	-2.6211	1.1973	-0.41211	-41.4244	70.115	640.722	-0.5708	0.19287	-0.40771	6.351	22.827	6.4454	0.15674	-0.05127	0.094727	-18.571	59.904	1448.2271	-2.4683	1.1685	-0.22607
0.386	-51.3169	0.8301	25.781	0.042968	-0.058399	0.027344	11.02	15.6723	11.2168	0.17103	-0.17845	0.016113	34.913	125.077	329.56775	-0.42188	0.23145	-0.05127	33.0028	39.634	1486.6004	-2.6152	1.1953	-0.40723	-64.89	48.72	724.9449	-0.74805	0.2373	-0.43018	-35.4116	38.5762	3.2568	0.16748	-0.060547	0.092773	-75.165	75.659	1405.404	-2.377	1.1465	-0.2207
0.388	-13.763	22.2792	36.89	0.019531	-0.049902	0.030273	32.0922	11.8572	7.9411	0.14665	-0.17238	0.016476	13.234	154.75596	286.1542	-0.39063	0.21338	-0.039551	35.8199	7.125	1486.861	-2.5938	1.2012	-0.39648	-63.76	11.245	792.259	-0.84033	0.26904	-0.43311	-13.739	-10.381	35.586	0.19092	-0.079102	0.094238	-47.9179	38.525	1442.142	-2.332	1.1309	-0.22168
0.39	3.016	24.4592	15.8938	0.00048828	-0.035645	0.030273	6.37	25.61218	-11.3821	0.12354	-0.16992	0.0092773	1.1928	99.486	272.9478	-0.3645	0.20703	-0.034912	65.0422	67.1847	1462.5669	-2.5737	1.2144	-0.38965	-44.735783	-77.953	892.77	-1.0464	0.33643	-0.41016	-31.272	32.402	31.9748	0.20801	-0.09082	0.09375	-63.1061	112.058	1418.905	-2.2344	1.1133	-0.22119
0.392	-10.638	-12.9186	17.9789	-0.017969	-0.026074	0.038379	-17.424	15.3192	12.4046	0.10874	-0.15685	0.011379	2.618	140.9973	242.9138	-0.33643	0.20166	-0.025879	10.431	71.6382	1433.526	-2.5508	1.2227	-0.39404	-20.368	-45.021	888.687	-1.2205	0.39942	-0.37427	-19.1623	15.9733	17.9888	0.22705	-0.10059	0.084961	-58.3876	87.577	1382.7517	-2.1687	1.093	-0.22094
0.394	14.9	30.501	4.96344	-0.0375	-0.018457	0.04834	38.357	13.0546	21.3471	0.091684	-0.14278	0.006899	-22.816	117.756	251.3666	-0.30518	0.18799	-0.015625	17.582	53.9376	1490.4385	-2.4956	1.2388	-0.38965	-44.796	-76.198	839.449	-1.4136	0.46338	-0.32813	-7.372	6.89834	21.3457	0.25195	-0.11377	0.081543	-11.188	106.5396	1374.344	-2.103	1.0688	-0.21924
0.396	20.576	11.3805	0.0344	-0.058203	-0.0086913	0.050684	-22.64	18.9786	6.1415	0.077934	-0.12457	0.0055904	-2.836	77.3527	229.9839	-0.28516	0.18799	-0.0058594	14.782	92.174	1470.5025	-2.4648	1.2402	-0.39746	-41.64	-127.745	842.947	-1.7324	0.58203	-0.26221	-47.0704	46.005	-6.7854	0.25928	-0.1167	0.074707	-59.7616	167.853	1312.41899	-2.0229	1.0298	-0.21387
0.398	13.061	7.62676	8.572	-0.074024	0.00039066	0.055469	-14.134	-0.5928	18.094	0.067392	-0.1075	0.0016526	-13.111	128.971	172.125	-0.24414	0.16504	0	-24.0179	45.727	1455.3489	-2.3882	1.2329	-0.38428	-51.3528	-78.67	807.6569	-1.916	0.65625	-0.23828	-20.49	10.2971	-7.2342	0.26758	-0.12891	0.06543	-27.806	119.1901	1304.2078	-1.9844	1.0039	-0.21143
0.4	40.4336	45.42	11.5489	-0.092285	0.010742	0.056152	11.742	20.2657	18.905	0.064941	-0.091797	-0.0024414	-18.0741	91.128	173.9572	-0.21192	0.15259	0.0095215	18.6603	44.896	1466.799	-2.3318	1.2048	-0.37866	-56.521	-76.7114	836.632	-2.3159	0.84619	-0.22607	9.089	34.6016	-4.6322	0.27002	-0.13525	0.053955	4.184	174.939	1272.9794	-1.8994	0.9668	-0.21094
0.402	28.847	7.024	2.979	-0.11006	0.018359	0.059864	-45.0345	16.1118	16.6853	0.066913	-0.071079	-0.011657	-23.097	109.061	161.6129	-0.18311	0.13184	0.01709	-16.964	68.5	1406.08563	-2.2852	1.1738	-0.37598	-11.1434	-42.164	889.88	-2.5523	1.0117	-0.22583	-23.583	36.9886	-6.91743	0.271	-0.14453	0.040039	-31.5164	173.753	1223.899	-1.8325	0.93554	-0.20556
0.404	53.5327	41.451	14.8253	-0.12071	0.025879	0.057715	-1.693	18.1625	26.4447	0.072009	-0.055585	-0.018941	-74.899	133.434	154.9469	-0.15039	0.11523	0.027344	-71.249	21.5895	1428.0672	-2.2246	1.1426	-0.37207	-52.537	-21.8445	914.562	-2.6968	1.1626	-0.22803	8.958	3.486	19.864	0.26465	-0.1499	0.025391	11.274	121.8991	1229.8436	-1.7632	0.90674	-0.20459
0.406	32.087	51.957	15.6653	-0.12422	0.032519	0.059277	4.606	29.0851	2.758	0.080205	-0.044409	-0.024439	-41.9347	83.3202	148.034	-0.13623	0.10107	0.031738	-42.587	95.146	1411.7503	-2.1948	1.1235	-0.37061	-125.847	-95.826	959.34	-2.6694	1.3423	-0.24463	-6.118	42.334	20.5741	0.26709	-0.15576	0.017578	-3.578	170.184	1196.4	-1.6753	0.87549	-0.2041
0.408	18.5	9.891	30.0799	-0.12529	0.033398	0.059863	-49.957	10.9121	-1.269	0.093423	-0.036893	-0.032171	-53.5584	114.109	109.395	-0.1084	0.086426	0.036621	-81.82	94.168	1376.6149	-2.1426	1.0977	-0.36133	-73.597	-89.295	990.6	-2.5815	1.4126	-0.26123	-17.161	15.71	19.176	0.26025	-0.16357	0.003418	0.25	130.1051	1173.1249	-1.6333	0.86572	-0.20947
0.41	34.637	37.728	25.5167	-0.12061	0.036133	0.0625	-0.747	11.01413	-6.5695	0.1084	-0.029785	-0.036621	-76.579	86.688	105.1609	-0.091553	0.077393	0.040772	-71.803	65.5422	1394.989	-2.0935	1.0764	-0.35254	-21.4569	-81.186	1009.481	-2.3062	1.5122	-0.33154	19.8	8.6803	27.8559	0.24634	-0.16578	-0.0095214	59.9922	127.448	1177.9372	-1.5503	0.83643	-0.20264
0.412	12.133	-1.5544	3.3307	-0.11729	0.040723	0.062207	-40.9333	21.078	-6.2448	0.11985	-0.023578	-0.043466	-56.08	42.617	110.052	-0.081055	0.070313	0.044434	-65.352	94.4378	1377.069	-2.0464	1.0532	-0.35254	24.536	-81.9	1054.4629	-2.0722	1.5498	-0.38623	-1.549	41.849	10.8541	0.23682	-0.16748	-0.021973	15.98	173.044	1155.8759	-1.4871	0.80787	-0.20069
0.414	23.964	0.73	16.7157	-0.11064	0.042382	0.06084	-42.3556	12.0856	14.334	0.13444	-0.018824	-0.046054	-86.4896	96.624	73.9848	-0.062012	0.062012	0.046875	-106.441	47.067	1350.167	-1.9751	1.0239	-0.3457	40.714	-47.72	1029.35	-1.8589	1.5337	-0.43799	8.847	-5.50942	33.695	0.22021	-0.15576	-0.029785	24.389	112.563	1145.862	-1.4253	0.77979	-0.19287
0.416	14.466	39.194	6.55318	-0.098144	0.04043	0.06045	7.92	39.594	15.8984	0.14347	-0.014539	-0.047128	-14.632	61.004	72.0405	-0.05127	0.052246	0.050781	-46.12179	86.2279	1353.889	-1.9395	1.0039	-0.34424	3.5798	-98.22	990.032	-1.6616	1.3696	-0.48389	17.145	19.4914	15.5604	0.21143	-0.15137	-0.032715	43.9295	163.3343	1111.8993	-1.3418	0.72461	-0.18945
0.418	-0.104999999999997	7.30807	7.82	-0.086035	0.046289	0.060547	-18.75	39.4761	19.6984	0.15489	-0.01259	-0.050654	-12.611	59.157	61.085	-0.033203	0.04541	0.05127	-63.848	142.589	1285.59992	-1.8652	0.9668	-0.34131	-0.410500000000001	-161.374	1009.483	-1.5938	1.2246	-0.49023	-10.643	19.36267	7.52	0.19775	-0.14014	-0.044434	36.2396	180.985	1065.042	-1.3042	0.69971	-0.18506
0.42	0.771000000000001	35.9822	25.8096	-0.066406	0.041992	0.060547	-5.663	18.41001	25.3049	0.16748	-0.015625	-0.056641	-41.182	65.622	47.3986	-0.019287	0.040527	0.054443	-84.542	94.653	1267.765	-1.8093	0.94458	-0.33204	28.271	-178.65515	1068.63	-1.5098	0.88477	-0.48047	34.213	-0.5367	21.4027	0.18872	-0.12476	-0.050537	77.898	160.2643	1058.675	-1.228	0.64893	-0.18115
0.422	-31.4	34.154	10.3994	-0.048437	0.03916	0.06416	-9.684	34.1219	19.5766	0.1706	-0.014774	-0.055426	7.288	21.4897	46.6588	-0.0092773	0.033691	0.055176	-16.706	136.733	1246.615	-1.7554	0.92627	-0.3335	32.243	-266.141	1169.186	-1.4773	0.65088	-0.46362	10.056	39.183	13.767	0.18652	-0.10596	-0.052246	53.451	237.776	1013.782	-1.1773	0.61621	-0.17652
0.424	-18.306	-7.478	32.1589	-0.025586	0.034864	0.062012	-14.902	18.9279	13.043	0.17719	-0.016167	-0.056179	7.09200000000001	81.147	17.9913	0.0058594	0.023438	0.056641	-34.02214	133.313	1199.8291	-1.6812	0.88916	-0.32959	5.887	-275.89	1240.497	-1.4692	0.43896	-0.45752	18.468	21.8066	28.328	0.17773	-0.079102	-0.058594	34.539	198.205	966.32429	-1.126	0.58496	-0.17529
0.426	-2.997	29.9503	36.7878	-0.0017578	0.027441	0.06123	23.007	16.3369	21.024	0.17882	-0.017184	-0.056688	6.367	85.717	33.7171	0.014648	0.016602	0.054688	23.221	116.719	1207.262	-1.6406	0.87305	-0.32617	-63.631	-276.827	1235.153	-1.5098	0.22461	-0.44238	29.978	13.44116	13.2182	0.17529	-0.071289	-0.067871	56.3465	182.0107	953.9324	-1.0488	0.54688	-0.16846
0.428	-44.2549	0.311999999999999	22.447	0.020117	0.016113	0.059668	-8.925	32.1018	-0.9488	0.17687	-0.016816	-0.058975	30.279	49.348	44.8817	0.027832	0.0068359	0.05127	22.9366	157.409	1186.604	-1.5625	0.83984	-0.32227	-107.419	-318.12	1251.438	-1.5405	0.1416	-0.45264	-12.459	48.677	-6.5827	0.17871	-0.042969	-0.081055	18.125	207.65	893.403	-1.0117	0.52832	-0.16895
0.43	-36.657	12.165	14.2097	0.039063	0.0063477	0.0625	15.231	-5.567	12.4383	0.17236	-0.01416	-0.056152	7.29	80.779	22.6358	0.04126	0.0046387	0.056885	-30.096	112.3026	1157.5852	-1.5032	0.80786	-0.31983	-82.638	-236.472	1263.38925	-1.6353	0.050293	-0.44678	0.159000000000002	17.0613	14.6724	0.18115	-0.020996	-0.08667	27.431	148.773	889.22	-0.93213	0.48877	-0.1665
0.432	-37.316	54.868	7.5563	0.060449	-0.0052734	0.061621	33.573	9.9576	10.47729	0.16549	-0.0043447	-0.059944	20.2753	29.5261	20.3078	0.054199	0.0014648	0.061523	38.7397	119.17186	1142.4285	-1.4453	0.77539	-0.31738	-37.88	-168.137	1292.175	-1.7312	0.050293	-0.44726	14.203	40.182	20.5309	0.18555	-0.00097656	-0.095215	36.31	209.927	864.2195	-0.88013	0.45361	-0.16772
0.434	-56.2094	18.7686	12.6141	0.075098	-0.020117	0.057422	-4.368	13.596	12.4448	0.15865	0.0042721	-0.056742	45.5734	33.6632	33.91	0.071777	-0.0063477	0.058594	29.933	140.40162	1101.8483	-1.375	0.72852	-0.30957	8.284	-127.415	1359.383	-1.8394	0.11523	-0.44678	-21.4334	41.066	16.3084	0.18994	0.022461	-0.10791	-16.297	229.732	803.9338	-0.82764	0.42432	-0.1582
0.436	-27.26	45.0598	15.6493	0.092676	-0.031445	0.058594	23.685	18.9237	35.711	0.14458	0.019867	-0.056342	32.9063	58.534	31.9555	0.078125	-0.0092773	0.061035	13.712	87.183	1080.8184	-1.3413	0.70361	-0.30615	33.7014	-61.749	1355.2439	-1.9897	0.30029	-0.46436	-10.924	4.91718	23.02	0.19238	0.038086	-0.11426	9.212	206.82	790.1366	-0.76514	0.37646	-0.14893
0.438	-26.2962	28.203	15.019	0.10957	-0.041504	0.053906	26.205	50.111	23.6662	0.13103	0.032162	-0.054295	26.72	12.1594	41.1435	0.089844	-0.020508	0.063477	66.248	145.1351	1054.367	-1.2827	0.65869	-0.29688	3.487	-100.601	1346.049	-2.0601	0.41748	-0.48193	-16.244	37.704	14.15902	0.19727	0.058594	-0.11865	-13.681	264.003	737.032	-0.74023	0.354	-0.1416
0.44	-42.1634	-8.7332	22.0977	0.12158	-0.048828	0.053711	4.64	30.0717	16.2372	0.11182	0.05127	-0.049805	37.237	48.04	-7.681	0.10132	-0.021973	0.066651	35.2417	145.58417	1022.061	-1.2439	0.62623	-0.29224	29.815	-79.006	1371.533	-2.1812	0.65186	-0.50732	-42.6339	16.5169	16.35964	0.19727	0.07666	-0.12793	-21.6	204.382	707.2301	-0.68945	0.31641	-0.13525
0.442	3.473	22.20319	25.6981	0.12959	-0.057226	0.049805	34.4809	14.275	27.933	0.093574	0.070884	-0.044922	15.039	20.5613	-16.178	0.10498	-0.028809	0.065918	46.2459	135.9898	997.6782	-1.2046	0.6001	-0.28516	56.2936	-40.503	1373.2126	-2.2554	0.82129	-0.52857	2.125	6.5946528	29.8461	0.2002	0.085449	-0.12646	7.749	196.835	706.7707	-0.64795	0.29956	-0.12353
0.444	-16.335	2.058	18.2269	0.13819	-0.066113	0.051172	-12.748	22.3928	15.0485	0.069555	0.087482	-0.04142	43.1906	-17.3197	18.0452	0.11719	-0.038574	0.065918	62.8915	178.571	969.1104	-1.1519	0.56299	-0.27441	38.92	-68.359	1392.501	-2.314	0.97705	-0.54443	-17.399	33	14.9293	0.19434	0.1001	-0.13672	-7.29	209.734	673.529	-0.6084	0.27734	-0.11475
0.446	-15.978	4.998	11.0526	0.14678	-0.063769	0.048828	-0.873999999999999	-1.419	32.4905	0.046116	0.10545	-0.034377	20.927	23.81804	28.4456	0.12305	-0.039551	0.071289	9.167	127.9226	930.77	-1.1294	0.54053	-0.26514	8.5	-45.439	1380.817	-2.3745	1.1606	-0.57373	-18.04	-21.831	22.8845	0.1919	0.11182	-0.13769	-4.866	143.1971	654.801	-0.55469	0.25293	-0.10791
0.448	11.623	29.736	-1.91838	0.15274	-0.071973	0.040527	26.876	11.024	61.945	0.025496	0.12831	-0.029011	34.2854	-2.9487	40.528	0.13281	-0.053711	0.080078	58.4897	153.479	904.6581	-1.0786	0.50439	-0.25732	-59.4111	-62.3248	1347.299	-2.3979	1.2368	-0.5835	1.295	-3.396	23.137	0.18506	0.12354	-0.12842	-6.907	176.417	607.257	-0.52588	0.23193	-0.10596
0.45	23.358	4.5741	11.1442	0.15771	-0.069824	0.037598	-30.393	-7.65	55.9239	-0.00048828	0.14893	-0.022461	12.657	19.4965	23.9454	0.14234	-0.056396	0.081299	51.7993	180.274	868.93	-1.0476	0.47729	-0.24316	-66.6899	-113.656	1406.133	-2.4375	1.3398	-0.60938	-43.5308	9.4417	4.7442	0.16992	0.13867	-0.13086	-10.175	168.48	569.0292	-0.46729	0.2041	-0.089355
0.452	35.026	29.348	30.198	0.16084	-0.076367	0.032422	-12.432	-48.744	110.0914	-0.022856	0.16983	-0.013867	-31.9835	48.359	16.2474	0.15234	-0.060547	0.084473	0.946999999999999	129.9003	833.31	-1.0156	0.45264	-0.23145	5.772	-60.119	1453.363	-2.4656	1.3801	-0.62769	-8.117	-2.737	22.9333	0.16211	0.14941	-0.12988	26.794	134.8287	548.8285	-0.42871	0.17969	-0.081543
0.454	41.4705	33.079	36.3772	0.16025	-0.076465	0.021485	-14.479	-22.803	143.89613	-0.045124	0.19063	-0.0086889	-16	-0.9062	32.403	0.16748	-0.073242	0.083496	27.1797	188	820.8245	-0.979	0.41992	-0.2085	3.549	-97.154	1499.3714	-2.498	1.3936	-0.64258	-7.074	50.205	17.0181	0.14307	0.16943	-0.12549	3.149	182.982	516.214	-0.39404	0.15723	-0.074707
0.456	7.903	-11.217	67.102	0.15908	-0.077637	0.013281	-36.6999	-29.094	240.3709	-0.071295	0.2086	0.00029511	-36.416	36.663	19.6213	0.18018	-0.080566	0.087891	-25.957	177.831	762.1711	-0.96436	0.40674	-0.19922	37.356	-113.698	1534.112	-2.5215	1.3789	-0.65039	-16.885	22.6514	22.559	0.1272	0.18286	-0.12061	-5.199	135.3426	484.997	-0.35254	0.13477	-0.05957
0.458	35.5637	-21.5367	60.5659	0.1582	-0.078613	0.0023438	-27.9048	-54.945	359.7495	-0.094046	0.22852	0.0030272	-56.3668	31.6062	15.7169	0.19824	-0.087402	0.076172	-16.762	161.235	760.6969	-0.92236	0.38916	-0.18213	34.353	-78.492	1486.802	-2.5328	1.3433	-0.64942	0.459999999999997	2.8413	33.405	0.1084	0.19873	-0.11523	43.425	144.403	461.312	-0.33984	0.11377	-0.049805
0.46	30.974	-49.1611	60.401	0.15332	-0.080566	-0.012207	-108.093	-66.745	465.019	-0.11816	0.24512	0	-24.043	7.03619	16.781	0.21338	-0.097656	0.067139	-32.128	218.263	703.7764	-0.89209	0.36719	-0.16846	24.791	-110.277	1499.028	-2.5273	1.2988	-0.65137	-16.013	36.921	11.65316	0.084473	0.21875	-0.10986	7.861	163.4456	417.312	-0.30713	0.085449	-0.044434
0.462	17.708	-42.502251	75.0038	0.15195	-0.083984	-0.018945	-134.088	-141.9513	555.633	-0.14814	0.25635	-0.010644	-47.105	48.531	6.3936	0.22705	-0.10449	0.049316	-70.5144	181.1613	685.1468	-0.854	0.35107	-0.15869	101.368	-36.896	1505.958	-2.5054	1.2329	-0.64404	-2.226	-4.296	20.9532	0.07373	0.22656	-0.1084	19.957	117.754	396.218	-0.28369	0.06665	-0.037109
0.464	44.874	23.4636	98.5183	0.14589	-0.082813	-0.03252	-108.771	-115.2647	569.9041	-0.18105	0.27002	-0.028416	-60.594	-1.8265	18.8823	0.24658	-0.11182	0.035645	-3.351	205.646	668.6501	-0.7998	0.32617	-0.15088	92.282	1.631	1468.597	-2.4761	1.2056	-0.64209	13.822	28.671	8.3266	0.04834	0.25098	-0.095703	49.208	166.075	369.0899	-0.26465	0.04541	-0.029297
0.466	35.761	10.3351	131.467	0.13965	-0.083593	-0.043457	-156.338	-115.825	610.861	-0.22402	0.28799	-0.053807	-28.437	5.18904	25.9487	0.25586	-0.11768	0.024902	-44.5484	202.449	618.03019	-0.76758	0.3125	-0.14941	51.154	-33.887	1496.25	-2.4121	1.1504	-0.64258	9.169	37.9057	0.9499	0.025635	0.2688	-0.088623	35.014	149.427	338.8779	-0.23584	0.013184	-0.022461
0.468	51.66	24.002	193.5802	0.129	-0.084961	-0.063379	-87.074	-121.5189	668.395	-0.28427	0.30146	-0.079882	-36.315	21.1663	12.12	0.26758	-0.12549	0.0024414	-74.631	141.7459	623.7359	-0.71045	0.28369	-0.13135	30.721	16.069	1477.0697	-2.3506	1.1133	-0.63965	22.034	-1.5652	6.393	0.0019531	0.28125	-0.085938	66.2484	121.2634	327.3026	-0.2251	0.0014648	-0.020996
0.47	35.971	39.571	219.941	0.11572	-0.087891	-0.087402	-35.4167	-78.2747	698.733	-0.35205	0.3208	-0.10791	-39.0627	-12.4205	18.998992	0.27613	-0.1355	-0.0080567	-17.097	177.426	579.9447	-0.6648	0.2605	-0.13941	-39.4202	3.439	1453.7682	-2.2891	1.0811	-0.63867	9.883	34.211	1.2611	-0.030273	0.30469	-0.070313	55.4577	170.733	294.467	-0.20068	-0.022949	-0.015625
0.472	1.873	27.5655	291.1001	0.089062	-0.083105	-0.10713	-39.192	-86.439	696.409	-0.44854	0.32959	-0.13321	-11.444	35.992	7.3048	0.27979	-0.13818	-0.024414	-38.774	166.539	540.408	-0.625	0.23828	-0.13428	-2.257	42.501	1472.59285	-2.2207	1.043	-0.64844	11.9764	7.7662	8.7089	-0.041992	0.31934	-0.0625	47.4689	117.739	277.621	-0.18506	-0.039551	-0.013183
0.474	23.849	82.0655	378.526	0.062207	-0.070703	-0.12715	30.762	-30.246	702.4504	-0.5626	0.3417	-0.15722	-28.8535	12.0875	10.7394	0.26758	-0.14063	-0.036621	-21.217	157.478	537.9572	-0.57275	0.21045	-0.13232	9.06	111.249	1428.382	-2.1851	1.0259	-0.64795	28.948	-19.890094	55.1317	-0.072266	0.34131	-0.052246	72.63	128.36	256.5112	-0.16699	-0.057617	-0.0087891
0.476	-19.184	94.9618	444.0244	0.02041	-0.061328	-0.14824	-5.247	-21.625	728.184	-0.70049	0.3585	-0.17207	-6.349	-15.2858	23.3272	0.26416	-0.13232	-0.044922	-1.551	193.834	501.134	-0.55176	0.18799	-0.13135	-17.61	59.525	1430.274	-2.1367	1.0117	-0.63867	-4.963	8.344	65.7042	-0.095701	0.35889	-0.046143	23.8	138.047	218.259	-0.15186	-0.077148	-0.0073242
0.478	-11.466	95.0982	541.0044	-0.035156	-0.04375	-0.16885	-15.999	-26.894	771.236	-0.85733	0.37491	-0.17002	-9.556	22.8806	16.1506	0.24707	-0.12207	-0.051758	-35.558	146.85	480.5009	-0.50586	0.16309	-0.12939	-0.271000000000001	77.66	1425.7823	-2.1052	1.0022	-0.62817	11.345	-53.1296	108.8107	-0.12012	0.37109	-0.038086	34.383	71.065	201.903	-0.13916	-0.081543	-0.003418
0.48	-8.604	114.366	584.406	-0.097656	-0.024414	-0.19141	51.133	-4.768	771.9351	-1.0269	0.39209	-0.15723	6.87	-10.4195	26.7241	0.23193	-0.10889	-0.047363	26.549	164.645	460.5073	-0.47558	0.14429	-0.12573	-23.72	88.0625	1382.3006	-2.0815	0.98486	-0.6167	9.882	-37.6282	152.4484	-0.1543	0.39209	-0.03125	29.01	105.65	181.8204	-0.12402	-0.092285	0.00048828
0.482	-55.938	52.1424	636.246	-0.17021	-0.0078129	-0.22285	34.968	-28.448	743.8543	-1.198	0.40713	-0.12314	23.601	-0.54523	26.598	0.20703	-0.093262	-0.055176	21.007	170.841	409.4096	-0.44873	0.12549	-0.12305	-2.66	49.6677	1404.5335	-2.0547	0.95703	-0.59766	-18.679	-7.427	188.9251	-0.17188	0.39844	-0.036133	11.361	108.651	174.5909	-0.11597	-0.10376	0.0046387
0.484	-55.3076	18.274	713.11976	-0.25234	0.0087888	-0.25059	65.173	-58.309	815.358	-1.3882	0.41836	-0.10049	-5.269	20.7276	13.3082	0.18213	-0.068848	-0.052734	3.848	122.1738	409.6054	-0.4043	0.099609	-0.12305	63.138	107.694	1436.306	-2.0405	0.94189	-0.59131	-4.037	-52.0707	269.116	-0.21387	0.41406	-0.049805	25.586	76.5901	191.134	-0.10303	-0.10791	0.0073242
0.486	-43.2586	-4.999	773.747	-0.34883	0.032617	-0.27793	23.362	-77.021	845.873	-1.5975	0.44648	-0.087598	25.874	-2.6837	13.84638	0.15967	-0.045898	-0.048828	59.9674	170.713	392.185	-0.38916	0.089844	-0.11523	18.817	67.8148	1421.7741	-1.9976	0.91455	-0.57617	-54.867	-22.761	336.934	-0.24707	0.42993	-0.060058	-6.258	116.829	170.687	-0.09375	-0.11426	0.0083008
0.488	-45.127	-62.429	799.495	-0.45478	0.059374	-0.3003	-21.656	-74.17	851.51	-1.814	0.49521	-0.091406	44.504	39.238	8.114	0.14502	-0.024902	-0.051758	33.782	141.7288	350.3234	-0.35889	0.066406	-0.10596	17.235	38.325	1414.072	-1.9646	0.89233	-0.56665	-95.194	-61.061	424.473	-0.29053	0.44824	-0.068359	-14.956	63.5521	165.2778	-0.083984	-0.11621	0.0083008
0.49	-16.72	-81.119	804.165	-0.56787	0.091309	-0.32568	67.5362	-87.332	862.365	-2.0015	0.56494	-0.10059	40.2212	32.8809	2.491	0.12305	0.0048828	-0.050293	55.747	125.8452	332.8396	-0.33887	0.046387	-0.10352	8.284	81.625	1347.8631	-1.9297	0.87695	-0.55859	-105.431	-63.8751	521.8704	-0.36768	0.46826	-0.087891	-2.604	69.6126	132.34209	-0.062988	-0.11475	0.012695
0.492	-22.357	-120.538	757.5657	-0.69922	0.13028	-0.34102	88.2551	-76.499	851.516	-2.1468	0.64717	-0.10742	59.6892	-3.3783	-6.365	0.11523	0.022461	-0.052246	61.3771	146.819	304.0911	-0.3208	0.029785	-0.095215	-16.383	11.6716	1347.8861	-1.8784	0.85205	-0.54834	-122.384	-21.157	534.463	-0.40967	0.48096	-0.096191	-29.699	102.952	88.941	-0.048829	-0.11719	0.013672
0.494	-64.253	-155.542	742.3092	-0.83888	0.17139	-0.34766	104.27	-146.345	902.553	-2.2491	0.74815	-0.12598	20.384	35.896	-27.8325	0.10986	0.052734	-0.053223	49.9989	99.974	297.67854	-0.30566	0.0039063	-0.098633	32.427	63.1836	1372.473	-1.853	0.84717	-0.53564	-111.325	-50.697	564.161	-0.50732	0.49316	-0.10059	-3.22300000000001	64.714	91.082	-0.039551	-0.11914	0.01416
0.496	-45.639	-113.979	749.8028	-0.97755	0.22178	-0.32969	124.401	-207.662	956.841	-2.2831	0.86494	-0.13222	14.219	9.1199	-13.1191	0.10572	0.071533	-0.058594	77.28898	128.85	284.6675	-0.29346	-0.0048828	-0.094238	7.36	79.889	1337.94	-1.8008	0.83008	-0.5293	-93.806	-12.876	576.908	-0.60156	0.50293	-0.11109	2.07	97.463	92.6137	-0.021973	-0.11963	0.015137
0.498	-41.736	-86.638	769.5916	-1.1338	0.27051	-0.30547	91.666	-227.835	947.368	-2.2644	0.96565	-0.13653	36.547	27.0362	21.259	0.11035	0.089844	-0.057129	51.042	147.691	218.285	-0.27734	-0.020508	-0.087891	-4.47	34.845	1306.189	-1.7517	0.81812	-0.51441	-80.259	-13.713	610.356	-0.7041	0.50391	-0.125	-51.09883	84.903	75.5329	-0.014648	-0.11621	0.012695
0.5	-27.7564	-38.4852	806.422	-1.3125	0.33301	-0.26465	103.3641	-260.44	1024.664	-2.209	1.0596	-0.14551	16.086	51.1461	17.9716	0.11963	0.11328	-0.0625	39.282	104.402	220.957	-0.26416	-0.026367	-0.083496	-5.022	91.911	1252.147	-1.7046	0.80518	-0.51318	-17.154	-51.214	657.355	-0.85889	0.51172	-0.13184	-26.867	42.7097	75.4796	0.0019531	-0.12109	0.011719
0.502	-62.278	-27.64839	812.413	-1.5145	0.41952	-0.22891	80.719	-251.476	1085.125	-2.1202	1.1298	-0.16035	15.538	-0.5728	19.9415	0.12061	0.12158	-0.061035	62.1531	133.488	215.0242	-0.25391	-0.037109	-0.084961	-79.27	54.637	1225.929	-1.6426	0.78223	-0.48779	-28.137	11.9602	650.4132	-0.93945	0.51221	-0.14258	-38.1592	89.858	47.496	0.01123	-0.12305	0.017578
0.504	-95.983	-75.829	834.533	-1.7464	0.53083	-0.2043	-14.949	-262.758	1119.459	-2.0139	1.1644	-0.179	-1.85400000000001	31.253	1.4553	0.12988	0.13916	-0.073242	0.699000000000002	97.4656	201.6989	-0.23633	-0.051758	-0.082031	-5.088	88.1434	1222.7141	-1.6147	0.77002	-0.479	-38.634	17.6553	682.3743	-1.0972	0.50879	-0.15527	-35.8384	53.204	55.5614	0.01416	-0.12305	0.019043
0.506	-62.784	-69.095	869.946	-1.9804	0.66871	-0.19336	7.265	-278.434	1175.526	-1.9108	1.1518	-0.204	-32.9939	35.748	-6.9507	0.14209	0.15699	-0.071777	8.545	82.1701	208.79	-0.22461	-0.056641	-0.084961	53.323	183.487	1160.054	-1.5605	0.74902	-0.46143	12.292	8.563	707.4761	-1.2221	0.50098	-0.1621	-15.785	71.949	56.49317	0.019531	-0.12646	0.019531
0.508	-58.376	-63.396	906.5089	-2.1635	0.80456	-0.19795	-2.3835	-212.069	1174.928	-1.8178	1.083	-0.2209	-13.634	17.8301	23.4771	0.14941	0.16943	-0.071289	15.86	115.617	163.752	-0.21045	-0.063965	-0.087891	29.724	137.876	1129.181	-1.5144	0.73755	-0.44409	-0.985999999999997	40.97442	725.488	-1.3569	0.49756	-0.17139	-40.475	88.8	26.4525	0.022217	-0.12646	0.022216
0.51	-16.8773	-77.35	956.269	-2.271	0.93213	-0.21826	-16.8725	-173.32	1223.547	-1.7339	0.97119	-0.22607	-32.8	56.453	5.5229	0.15479	0.17725	-0.072266	-33.9951	71.7235	160.571	-0.19092	-0.067383	-0.087402	30.206	170.114	1106.838	-1.4727	0.72754	-0.42676	7.445	-24.0668	737.9308	-1.5254	0.50879	-0.18701	-12.891	42.265	36.0902	0.020508	-0.13135	0.029785
0.512	18.0054	-50.54	961.383	-2.236	1.041	-0.23839	-0.971	-122.115	1277.5612	-1.6799	0.83164	-0.21953	-25.253	-3.517	2.2042	0.15283	0.18359	-0.071777	-6.105	87.068	158.713	-0.17822	-0.072266	-0.084961	0.743000000000002	163.847	1075.094	-1.416	0.71484	-0.4082	31.512	-41.118	777.318	-1.6147	0.52686	-0.19678	5.709	52.0427	20.9297	0.016602	-0.13037	0.033203
0.514	-6.98	-105.414	944.764	-2.0873	1.1227	-0.25881	-44.266	-69.332	1252.9189	-1.644	0.68662	-0.21748	-21.816	-7.6908	9.3724	0.15283	0.18701	-0.070313	-28.622	95.567	109.6945	-0.15869	-0.075684	-0.085938	19.997	116.304	1091.435	-1.3901	0.71338	-0.39795	-3.609	-40.393	811.946	-1.7559	0.57324	-0.20947	-2.95	42.583	34.52268	0.014648	-0.13086	0.03125
0.516	13.567	-149.843	967.105	-1.8767	1.1864	-0.29399	-0.370000000000005	-99.383	1265.1826	-1.6327	0.55342	-0.22334	-54.3117	27.867	-5.335	0.14893	0.19189	-0.064697	-48.821	53.908	97.806	-0.13818	-0.077636	-0.085938	55.3706	175.578	1066.6659	-1.3418	0.70117	-0.37109	-4.639	-83.51	858.743	-1.8203	0.61475	-0.22021	17.677	2.292	47.0084	0.013184	-0.12891	0.038574
0.518	20.198	-165.531	1001.189	-1.6561	1.2348	-0.33255	5.66499999999999	-82.6	1279.5633	-1.6358	0.45029	-0.23193	-35.8745	18.859	33.321	0.14258	0.19385	-0.063477	-22.699	78.539	96.0301	-0.12012	-0.074219	-0.091797	-19.364	111.175	1038.865	-1.3037	0.69433	-0.35449	33.748	-49.621	858.1645	-1.877	0.6543	-0.23633	7.369	57.988	26.4424	0.0053711	-0.12842	0.040284
0.52	-19.22185	-213.758	1067.5439	-1.4751	1.2505	-0.36475	-32.775	-60.431	1303.7312	-1.6577	0.37354	-0.23193	-18.919	70.109	24.116	0.13379	0.2002	-0.053711	-71.2981	52.045	85.7718	-0.10254	-0.07666	-0.087891	-25.9982	92.542	1013.46	-1.2632	0.69092	-0.33545	53.047	-91.338	842.73	-1.894	0.71533	-0.25342	28.918	23.5664	40.197	-0.00048828	-0.12744	0.040039
0.522	-5.241	-224.911	1147.593	-1.3713	1.1994	-0.38895	-4.709	-103.217	1381.6056	-1.7089	0.32705	-0.229	-44.15429	53.502	17.6542	0.12598	0.20459	-0.049805	-48.0497	38.935	91.399	-0.088867	-0.07959	-0.090332	-11.754	129.153	936.174	-1.2222	0.68994	-0.30762	90.5068	-162.1	880.4026	-1.8867	0.74219	-0.27197	41.3484	13.4129	32.361	-0.0083008	-0.12891	0.046387
0.524	-60.467	-223.217	1175.902	-1.334	1.0927	-0.39906	-26.823	-60.46	1393.7306	-1.7828	0.31055	-0.23047	-34.117	7.7836	19.9651	0.11523	0.20801	-0.044922	-36.9322	72.077	74.019	-0.072754	-0.086426	-0.090332	-47.4261	87.765	900.04606	-1.1987	0.68311	-0.29541	98.958	-170.873	903.6743	-1.8359	0.78125	-0.29785	21.377	18.6839	18.37618	-0.0063477	-0.13184	0.042969
0.526	-104.717	-253.161	1202.036	-1.3449	0.92805	-0.39084	-51.6982	-92.241	1416.815	-1.8941	0.32656	-0.23125	-36.5403	43.583	7.3026	0.10816	0.21118	-0.040528	-49.4588	40.101	52.70268	-0.059082	-0.085205	-0.087402	-13.8609	146.5097	870.017	-1.1519	0.67529	-0.26514	104.849	-242.92	980.718	-1.7788	0.79736	-0.31494	21.38	-18.1946	22.516	-0.016113	-0.12891	0.047363
0.528	-57.915	-213.358	1248.569	-1.3923	0.73978	-0.37045	-35.298	-129.9871	1447.088	-2.0111	0.38437	-0.24043	-18.29	11.4851	29.241	0.10596	0.2168	-0.038574	-21.523	54.29	56.7951	-0.047363	-0.085938	-0.087891	-33.8851	139.6735	822.977	-1.1128	0.67139	-0.24561	88.276	-252.913	1048.769	-1.7188	0.80469	-0.32813	27.306	20.7372	3.327	-0.028809	-0.12671	0.052978
0.53	-64.171	-173.933	1259.7521	-1.4526	0.55518	-0.35547	-51.406	-91.73	1460.288	-2.1343	0.47119	-0.24951	-7.392	20.6572	33.1668	0.094238	0.22559	-0.035645	-45.3492	63.911	24.8834	-0.030273	-0.094727	-0.083984	-53.3072	102.6239	813.556	-1.0762	0.66016	-0.22559	60.0259	-222.642	1062.901	-1.6362	0.7749	-0.34473	-0.350999999999999	20.9035	1.159127	-0.033691	-0.12451	0.057129
0.532	-36.185	-131.0227	1315.3428	-1.5396	0.41189	-0.3462	-1.311	-133.7669	1510.262	-2.2476	0.57812	-0.26992	-17.178	35.7243	20.4602	0.088867	0.22949	-0.027832	-23.588	37.7868	21.957	-0.019043	-0.09668	-0.083496	-11.881	185.926	782.601	-1.0176	0.65039	-0.20801	36.246	-251.623	1106.937	-1.5972	0.75146	-0.35303	24.344	-5.6112	24.333	-0.047852	-0.12207	0.056152
0.534	-10.723	-50.102	1331.645	-1.6412	0.31011	-0.34467	27.019	-107.9171	1523.224	-2.3428	0.69384	-0.28379	16.171	-10.6208	40.988	0.081055	0.23389	-0.03125	8.247	66.358	21.8825	-0.0058594	-0.10352	-0.07666	-30.1931	173.683	764.594	-0.98975	0.64111	-0.19238	18.943	-194.075	1138.621	-1.5522	0.68408	-0.35693	10.646	36.171	12.40145	-0.051758	-0.12158	0.060547
0.536	-29.3062	-40.322	1337.839	-1.7667	0.26587	-0.34157	-7.2941	-87.374413	1507.19	-2.4256	0.80088	-0.29981	30.471	13.2508	37.2151	0.076172	0.23609	-0.029297	-8.6	32.244	20.7591	-0.0021973	-0.11231	-0.070556	7.431	215.932	764.199	-0.93018	0.62158	-0.17578	8.828	-153.3775	1147.207	-1.5376	0.63062	-0.35889	8.217	3.2813	12.7855	-0.058594	-0.12402	0.066895
0.538	47.578	-23.453	1391.904	-1.897	0.28873	-0.34397	51.941	-152.133	1551.029	-2.4741	0.90557	-0.31406	23.6	-23.892	57.5602	0.074707	0.23535	-0.033691	24.582	16.8075	44.307	0.0039063	-0.12012	-0.066406	0.9517	267.317	701.173	-0.88868	0.60547	-0.1587	9.701	-165.924	1221.138	-1.5449	0.57813	-0.36328	33.9055	20.7552	11.6111	-0.059814	-0.12403	0.066406
0.54	41.87	1.416	1382.9247	-2.0269	0.36768	-0.3501	69.3075	-89.079	1559.608	-2.5073	0.99463	-0.33398	34.419	-63.28	95.0669	0.05957	0.23584	-0.041992	29.585	36.602	16.9678	0.010254	-0.12646	-0.056641	-74.918	196.678	645.536	-0.84766	0.58984	-0.14551	-6.055	-95.389	1243.4694	-1.5913	0.53369	-0.35254	-35.2541	36.5867	19.2503	-0.058105	-0.12549	0.062988
0.542	4.384	-37.702	1403.015	-2.153	0.49026	-0.3663	59.184	-83.8132	1524.504	-2.5115	1.0639	-0.36446	22.384	-20.968	113.76958	0.050781	0.2373	-0.052734	1.981	8.54202	12.67352	0.0097656	-0.1333	-0.052246	-62.456	222.823	597.91	-0.78662	0.56201	-0.12842	-23.43356	-105.713	1291.232	-1.623	0.52148	-0.34961	-11.706	-1.6277	21.1602	-0.056152	-0.12695	0.060059
0.544	6.105	-19.685	1421.5612	-2.2542	0.62898	-0.38081	75.102	-53.303	1531.176	-2.5047	1.1211	-0.39111	26.19236	-66.6649	171.2303	0.03418	0.2373	-0.068359	63.185	30.391	10.8948	0.015137	-0.13525	-0.032715	-88.603	209.542	571.6316	-0.75391	0.55078	-0.12256	-13.6	-108.101	1326.411	-1.7026	0.52686	-0.35156	-9.825	25.3743	3.3071	-0.055176	-0.12988	0.053223
0.546	-66.8241	-25.07	1420.8079	-2.3359	0.76229	-0.39107	40.537	37.671	1488.3809	-2.5016	1.1648	-0.40479	48.4873	-75.7807	246.1087	0.0063477	0.23632	-0.086181	34.161	36.8975	-8.2158	0.0090331	-0.14575	-0.025879	-60.784	173.3466	570.4436	-0.6958	0.52979	-0.10498	-17.747	-53.326	1308.6665	-1.7724	0.55175	-0.35522	-44.0558	27.1735	-3.4066	-0.053711	-0.13428	0.053223
0.548	-55.0864	-53.71	1455.947	-2.3966	0.87914	-0.40166	39.4427	-4.158	1496.325	-2.5042	1.186	-0.41592	5.443	-86.6318	289.275	-0.030762	0.23584	-0.10596	30.58	5.7859	6.545	0.0058594	-0.14746	-0.01709	-13.1623	214.706	536.8904	-0.65503	0.51001	-0.099365	-1.659	-81.896	1331.6043	-1.8389	0.58008	-0.35352	-0.971	-15.18783	15.5022	-0.044189	-0.14282	0.042969
0.55	-8.8918	-36.704	1479.84489	-2.4395	0.97656	-0.41211	53.9332	12.1407	1504.1834	-2.5137	1.1953	-0.4209	-25.9834	-134.083	370.607	-0.10547	0.24023	-0.13037	82.0217	26.6584	0.2891	-0.0078125	-0.15381	-0.0068359	-57.63	151.47721	497.889	-0.61572	0.49072	-0.085449	12.346	-49.812	1332.781	-1.9272	0.64697	-0.36621	-29.991	22.2716	6.258	-0.039551	-0.15723	0.039551
0.552	-38.6904	-82.067	1507.938	-2.4719	1.0644	-0.42607	46.3137	42.9655	1457.74	-2.5314	1.1938	-0.41465	-46.994	-71.748	464.086	-0.15625	0.24072	-0.14893	6.558	8.1866	-8.0957	-0.0097656	-0.1543	-0.0019531	-48.02	154.832	485.46981	-0.56641	0.46289	-0.077148	-22.533	-38.244	1352.984	-1.9741	0.6792	-0.37256	-46.7553	-11.6815	16.8628	-0.036133	-0.16602	0.021973
0.554	-3.072	-95.183	1563.71	-2.4979	1.1272	-0.4339	83.65	-13.689	1506.4578	-2.5586	1.1886	-0.40586	-109.4152	-46.2066	532.9842	-0.27246	0.25195	-0.1709	21.929	12.0331	24.1375	-0.019531	-0.15674	0.0068359	-42.265	187.811	464.9793	-0.54883	0.45166	-0.071777	-27.136	-108.8095	1418.4614	-2.0737	0.75342	-0.38623	-24.395	0.9537	8.20793	-0.032715	-0.17188	0.016113
0.556	1.788	-47.538	1547.611	-2.525	1.1615	-0.44356	64.064	49.9231	1495.3502	-2.5914	1.1793	-0.39805	-102.4845	-37.5168	612.99725	-0.38184	0.25537	-0.19214	46.7827	38.503	15.8638	-0.025147	-0.15893	0.021728	-34.9905	139.301	469.0663	-0.50977	0.42188	-0.054688	-46.2406	-87.317	1457.2842	-2.154	0.80737	-0.40332	-42.7027	30.9635	-2.7035	-0.032715	-0.18213	0.01416
0.558	-4.005	-67.624	1555.721	-2.5545	1.1694	-0.45135	2.405	36.9295	1467.2757	-2.6158	1.1779	-0.38437	-93.362	8.10096	630.9799	-0.50293	0.26465	-0.19824	-0.541	16.89364	18.5566	-0.034668	-0.16406	0.024902	11.744	183.162	448.55305	-0.48755	0.39892	-0.043701	-36.74	-129.2106	1486.44	-2.2324	0.86523	-0.42188	-4.742	-12.5907	10.142	-0.031006	-0.18604	0.0046387
0.56	66.296	-25.415	1568.737	-2.5879	1.1582	-0.46094	28.075	5.3967	1475.3689	-2.6343	1.1821	-0.37549	-95.169	-29.327	650.7172	-0.69482	0.28467	-0.20654	21.626	36.701	19.5091	-0.046875	-0.16309	0.035156	-0.605	171.071	418.8457	-0.46826	0.37842	-0.031738	-13.808	-146.026	1524.22	-2.3315	0.94385	-0.43896	-16.371	13.6775	5.37138	-0.035156	-0.19043	-0.00048828
0.562	34.4187	-3.372	1526.623	-2.6152	1.1374	-0.47516	9.047	57.826	1455.8696	-2.6432	1.1892	-0.36309	-84.064	-32.897	683.59	-0.79492	0.29492	-0.21387	-9.722	36.128	-13.244	-0.050293	-0.16064	0.044434	-23.23	134.944	398.089	-0.44141	0.35645	-0.022949	-6.644	-55.254	1500.264	-2.3823	0.98291	-0.44727	-46.0611	16.3642	-7.8455	-0.038574	-0.18555	-0.012207
0.564	29.3629	-27.336	1537.04	-2.6364	1.1136	-0.48711	13.112	-12.6288	1480.299	-2.6407	1.202	-0.35478	-70.551	-21.77	702.256	-0.99951	0.32764	-0.2124	-31.645	14.12492	12.4579	-0.059082	-0.15771	0.053223	-23.5439	183.552	371.148	-0.43066	0.34863	-0.018555	1.555	-81.7484	1501.954	-2.4688	1.0566	-0.46484	-4.582	7.1994	-5.0293	-0.04248	-0.18311	-0.016113
0.566	13.972	34.8656	1535.11433	-2.6529	1.0954	-0.49406	25.068	6.4284	1501.095	-2.6283	1.2192	-0.35088	-14.457	-75.9289	731.399	-1.1421	0.3545	-0.19971	-9.47	47.419	10.2212	-0.064942	-0.16016	0.057617	-44.159	145.786	341.626	-0.40625	0.32959	-0.012695	28.494	-49.2041	1514.0243	-2.5166	1.1094	-0.47803	4.154	57.801	1.1256	-0.049805	-0.16846	-0.02002
0.568	-72.607	55.365	1531.8233	-2.6599	1.0806	-0.50518	-60.4256	59.625	1461.7241	-2.609	1.2492	-0.34863	0.582000000000008	-38.043	754.439	-1.2769	0.37939	-0.18164	-45.9449	35.79	8.01102	-0.070801	-0.15918	0.064453	-7.1602	160.342	320.7574	-0.38184	0.31811	-0.01001	49.7472	-16.756	1511.808	-2.5586	1.1582	-0.49072	0.891999999999999	21.0445	16.196	-0.058593	-0.15259	-0.020996
0.57	-35.842659	78.402	1575.513	-2.6558	1.0747	-0.51367	-44.3562	17.931	1467.478	-2.5776	1.272	-0.35205	-17.105	-29.635	741.912	-1.4746	0.41211	-0.18457	-37.0801	26.6573	19.742	-0.07666	-0.16699	0.064453	-6.3658	176.946	288.5242	-0.35889	0.30762	-0.0068359	37.2406	-75.168	1557.631	-2.5952	1.2114	-0.50635	17.637	23.925	9.4196	-0.063477	-0.13379	-0.017578
0.572	-22.9776	139.362	1518.482	-2.6361	1.0623	-0.53081	-36.112	84.0527	1447.306	-2.5399	1.2793	-0.34687	17.575	-62.432	770.277	-1.5757	0.45313	-0.19092	-24.097	20.5851	15.7261	-0.077637	-0.16211	0.070313	-58.286	113.258	277.4671	-0.32275	0.28906	-0.0058594	45.4318	-6.151	1557.783	-2.6089	1.231	-0.49951	1.17	51.204	-19.9799	-0.074219	-0.10449	-0.022949
0.574	-57.455	85.4818	1500.811	-2.5987	1.0615	-0.54629	-86.013	57.9003	1410.3077	-2.5027	1.266	-0.3457	-8.022	-28.881	779.208	-1.7871	0.55469	-0.21631	-69.805435	-0.8569	33.557	-0.080566	-0.16602	0.074219	-31.1799	134.4716	247.0002	-0.30615	0.28369	-0.0097656	41.9474	0.717000000000002	1513.0333	-2.6382	1.2661	-0.51904	21.422	6.2576	-8.9117	-0.079102	-0.091309	-0.016602
0.576	-6.968	86.446	1510.0757	-2.5453	1.057	-0.55997	-30.531	26.703	1416.794	-2.4687	1.2321	-0.33672	-21.8075	-94.386	809.702	-1.9109	0.65698	-0.23315	-44.172	24.5756	35.193	-0.087158	-0.16333	0.076905	-32.26518	111.6155	219.26129	-0.27295	0.26025	-0.0024414	44.2244	-32.1441	1502.6286	-2.6628	1.2854	-0.52319	42.796	40.5695	-2.6071	-0.087402	-0.056641	-0.020508
0.578	-51.387	98.227	1477.9319	-2.4793	1.0436	-0.57483	-41.712	116.809	1389.088	-2.4456	1.1829	-0.32295	3.536	-121.032	893.8318	-1.9956	0.76025	-0.2417	-46.15977	42.222	9.7802	-0.09375	-0.16504	0.078125	-7.328	88.776	215.2244	-0.24658	0.2456	0.0026856	39.588	53.367	1480.7272	-2.6831	1.3052	-0.52393	16.497	29.3534	7.8992	-0.088379	-0.03125	-0.019043
0.58	-37.5127	68.3644	1514.7603	-2.4102	1.0195	-0.58447	-61.6	91.636	1371.1381	-2.4219	1.1377	-0.30762	0.928999999999995	-101.297	934.903	-2.0508	0.90039	-0.25977	-42.1144	10.1121	18.8054	-0.099121	-0.1582	0.077637	11.035	136.028	189.8156	-0.22656	0.22949	0.0019531	45.3687	18.64559	1474.773	-2.7124	1.3247	-0.52246	28.6691	1.0566	18.10027	-0.09082	-0.0092773	-0.0078125
0.582	15.471	110.237	1504.5689	-2.3432	0.99356	-0.58897	-22.95	137.945	1344.7247	-2.3952	1.096	-0.28857	42.626	-159.52	990.611	-2.0483	0.96729	-0.26318	-25.081	21.2709	29.54	-0.10547	-0.15576	0.08252	-17.1078	83.823	163.9397	-0.20068	0.20752	0.0087891	71.6102	44.1201	1467.392	-2.7339	1.3276	-0.5166	23.295	40.188	-8.7691	-0.088379	0.01709	-0.014648
0.584	-16.34	82.004	1479.2056	-2.286	0.94873	-0.59039	-42.377	170.172	1301.39	-2.3629	1.0596	-0.2748	66.823	-155.909	988.321	-2.0156	1.0684	-0.2793	-48.8005	-9.50465	13.5746	-0.12158	-0.14697	0.088379	-1.196	97.841	168.24	-0.18896	0.2002	0.0068359	47.6568	86.71	1456.3874	-2.7598	1.3438	-0.50293	9.179	10.2443	8.93744	-0.083496	0.033203	-0.01709
0.586	14.357	48.5736	1508.86	-2.2372	0.89994	-0.58378	7.284	104.989	1307.419	-2.3132	1.0326	-0.27207	58.463	-170.554	940.462	-1.9648	1.1201	-0.28784	7.739	-2.091	28.318	-0.13526	-0.14136	0.089356	-22.4889	113.362	154.993	-0.16602	0.1792	0.015137	9.703	13.358	1520.764	-2.7773	1.3535	-0.48828	23.608	19.3534	30.721	-0.078125	0.055176	-0.013672
0.588	9.707	88.987	1478.0856	-2.2009	0.84592	-0.57155	2.793	152.473	1283.914	-2.2631	1.0078	-0.27285	94.9826	-223.975	985.904	-1.9063	1.1504	-0.29541	7.366	26.9202	18.3052	-0.14941	-0.13037	0.097168	-31.192	65.28594	169.639	-0.14429	0.1665	0.020264	26.621	66.228	1529.178	-2.7793	1.3584	-0.48047	-6.03	51.646	15.3324	-0.074463	0.065674	-0.012695
0.59	-36.3978	69.17	1454.1988	-2.1753	0.80127	-0.55908	-8.626	130.711	1264.3156	-2.2031	0.98633	-0.27246	113.842	-188.761	1045.381	-1.8276	1.1353	-0.30371	-22.2369	10.9013	17.2571	-0.17529	-0.11719	0.10205	-3.356	76.1825	142.0318	-0.12207	0.14844	0.024414	18.754	40.977	1506.3243	-2.7749	1.3657	-0.46436	9.375	9.624	7.0977	-0.063477	0.077148	-0.014648
0.592	27.75411	104.2633	1472.103	-2.1556	0.75735	-0.55284	26.6684	110.842	1280.758	-2.139	0.95888	-0.27305	104.107	-234.64	1116.0685	-1.7983	1.1011	-0.30469	42.8216	24.5502	22.8109	-0.18457	-0.1123	0.10449	-39.7731	44.269	92.7598	-0.094727	0.12695	0.032715	6.906	12.6718	1515.234	-2.7544	1.3648	-0.45874	14.365	38.846	5.1034	-0.047852	0.080566	-0.017578
0.594	-21.6241	135.953	1423.166	-2.1442	0.72622	-0.5344	27.6953	171.095	1262.936	-2.0792	0.93174	-0.26807	77.2871	-284.228	1178.156	-1.7573	0.99072	-0.3042	13.583	39.887	-1.46547	-0.20703	-0.089844	0.11279	-38.3362	19.679	78.461	-0.081543	0.11719	0.038086	3.23	82.026	1487.778	-2.7305	1.3555	-0.44922	-9.665	26.713	10.252	-0.037598	0.083496	-0.016113
0.596	-29.4386	94.233	1394.444	-2.1254	0.69962	-0.52187	32.418	110.2272	1238.714	-2.0272	0.904	-0.25869	66.7804	-256.1461	1159.174	-1.7529	0.89306	-0.30151	14.25	8.94744	9.9778	-0.22144	-0.070312	0.12378	-20.583	42.6349	45.392	-0.050781	0.10352	0.046875	-37.62415	26.423	1482.228	-2.6865	1.3281	-0.43457	2.545	0.1693	33.406	-0.01709	0.085449	-0.025391
0.598	1.02	124.445	1355.031	-2.1084	0.68517	-0.5166	40.26	124.1433	1205.1939	-1.9828	0.87676	-0.25185	58.0714	-268.577	1193.101	-1.7598	0.79883	-0.29688	76.071	20.7958	11.9454	-0.2373	-0.049316	0.13184	-41.7703	18.2125	49.451	-0.031982	0.093262	0.056885	-37.6877	59.9117	1483.59	-2.6577	1.3091	-0.42822	-29.56	51.604	18.6469	-0.0026856	0.082764	-0.026123
0.6	-49.2502	112.67	1302.343	-2.0874	0.67627	-0.50732	21.251	147.206	1130.822	-1.9409	0.85303	-0.23975	47.22227	-217.377	1249.6479	-1.7866	0.70166	-0.28564	5.1	3.30271	15.4498	-0.24561	-0.026367	0.1416	-0.536999999999999	35.514	50.1194	-0.0048828	0.083496	0.060059	-64.052	104.453	1424.6118	-2.6011	1.2583	-0.41064	-40.861519	27.5129	12.2625	0.013672	0.07959	-0.033691
0.602	-3.97799999999999	118.375	1317.658	-2.0731	0.67295	-0.49971	48.8295	95.94	1145.9144	-1.9048	0.82803	-0.23252	8.1102	-142.334	1264.976	-1.8125	0.66797	-0.2793	31.5451	3.075	21.1997	-0.25049	-0.01123	0.14404	4.575	44.279	6.954	0.016602	0.061035	0.069336	-66.372	27.602	1435.2775	-2.5613	1.2122	-0.39429	-23.27	27.833	23.042	0.034668	0.076172	-0.041016
0.604	9.733	189.632	1253.1094	-2.0629	0.67363	-0.48848	69.9947	159.821	1137.665	-1.8683	0.80782	-0.22451	-1.6704	-163.1275	1293.347	-1.8643	0.63672	-0.2793	58.6454	27.3737	-1.1796	-0.24561	0.01123	0.146	-25.4906	8.6936	18.0728	0.039307	0.043702	0.075195	-58.7427	79.7934	1432.981	-2.5112	1.1646	-0.38037	-34.749	48.974	20.6304	0.039063	0.073242	-0.04541
0.606	-21.4086	152.876	1211.89	-2.05	0.67012	-0.47714	42.9963	155.759	1095.3613	-1.8297	0.78321	-0.21709	-5.456	-94.841	1313.3775	-1.9131	0.64306	-0.28418	-0.117000000000001	2.491	5.4887	-0.23706	0.026855	0.14185	25.575	45.978	17.4908	0.055176	0.030273	0.07959	-82.276	85.3805	1412.094	-2.4512	1.0996	-0.3623	-24.447	0.0663999999999998	19.5731	0.055176	0.065918	-0.05957
0.608	44.0257	171.482	1205.3046	-2.0355	0.66689	-0.46416	74.429	131.52234	1087.388	-1.7889	0.76064	-0.21289	-4.4272	-81.977	1313.496	-1.9629	0.66113	-0.29199	54.9856	8.6187	19.9489	-0.21826	0.037598	0.14258	-4.221	40.6102	14.5149	0.075684	0.0097656	0.082031	-48.2103	74.5418	1396.594	-2.4219	1.0742	-0.35986	-25.743	31.325	8.0605	0.062011	0.058838	-0.070068
0.61	-0.384	186.977	1160.6466	-2.0117	0.66406	-0.45313	59.2712	184.886	1018.01	-1.752	0.73828	-0.20557	-10.267	-98.111	1354.278	-2.0391	0.71387	-0.32227	35.073	18.6656	-1.4839	-0.18701	0.044434	0.13623	5.995	29.8705	30.316	0.084961	0.0014648	0.087402	-36.5007	165.371	1355.5752	-2.3477	1.0234	-0.34766	-44.9377	12.668	29.755	0.058594	0.054688	-0.086426
0.612	8.45	134.149	1154.495	-1.9785	0.66338	-0.43799	17.871	140.087	990.824	-1.7095	0.71533	-0.20557	-12.391	-50.571	1350.101	-2.082	0.74609	-0.34082	0.309999999999999	-2.3584	9.1389	-0.16553	0.048828	0.12793	23.4893	48.3952	-9.4137	0.10986	-0.024414	0.09375	-62.887	112.428	1337.943	-2.2935	0.98877	-0.34082	-13.684	-47.5659	56.716	0.049316	0.04834	-0.11279
0.614	45.4436	175.482	1129.555	-1.9371	0.65703	-0.4253	36.464	178.575	971.073	-1.6667	0.69346	-0.20127	-29.626	-115.018	1351.5193	-2.1616	0.81299	-0.37939	26.415	26.353	6.4267	-0.12305	0.047852	0.11377	-26.893	6.5503	-5.3973	0.11865	-0.038574	0.099611	-35.038	114.105	1313.23317	-2.2339	0.95361	-0.33838	-37.107	-23.998	71.508	0.043945	0.049805	-0.12891
0.616	-36.1551	148.7866	1093.874	-1.8855	0.65781	-0.4124	1.907	231.848	936.6276	-1.6132	0.67041	-0.19736	-40.191	-139.939	1385.381	-2.2364	0.86719	-0.40625	-16.507	13.3774	-5.4329	-0.091554	0.039307	0.099854	-3.644	14.2987	10.0377	0.12646	-0.052246	0.10645	-26.1385	157.447	1261.997	-2.1597	0.90479	-0.3335	-44.0958	-52.429	77.1925	0.016113	0.057617	-0.13916
0.618	-6.0146	121.119	1105.326	-1.8273	0.64648	-0.40029	24.895	179.0188	928.4647	-1.5553	0.64355	-0.19805	-60.6331	-116.039	1375.8241	-2.3003	0.9165	-0.42236	-2.124	-2.116	20.3534	-0.066406	0.025879	0.094238	-9.77	26.33	-15.2811	0.13867	-0.069824	0.11377	-30.8878	98.2734	1288.6219	-2.1211	0.88477	-0.32764	1.169	-46.7369	91.6674	-0.018555	0.062988	-0.15918
0.62	-25.6924	163.507	1051.554	-1.7695	0.63281	-0.38232	-1.59	193.5021	881.2677	-1.4902	0.62109	-0.19727	-45.0306	-185.209	1439.2637	-2.3984	0.98633	-0.44727	-14.757	25.5702	-3.4472	-0.022461	0.0043945	0.0625	-1.943	2.564	4.5929	0.13818	-0.078613	0.11963	6.563	163.474	1280.788	-2.0508	0.83398	-0.31592	-12.4209	-30.274	109.485	-0.059082	0.070801	-0.17139
0.622	-62.48	121.172	1012.7168	-1.7094	0.6291	-0.36787	-50.4685	167.0306	830.471	-1.4265	0.58946	-0.19932	-33.206	-144.1402	1470.693	-2.439	1.022	-0.45117	-48.1406	22.15532	-0.4154	-0.0043945	-0.0048828	0.057129	38.156	31.4862	-4.2119	0.14453	-0.098633	0.12744	10.6007	127.9079	1243.686	-1.9991	0.79199	-0.30982	5.327	-75.8433	125.5636	-0.13135	0.081543	-0.19141
0.624	1.023	158.77	960.2562	-1.646	0.62373	-0.3502	-6.04	148.554	817.181	-1.362	0.55479	-0.18964	-65.8643	-142.1721	1465.553	-2.5137	1.0938	-0.45898	-23.77	34.951	17.4028	0.031738	-0.030273	0.029785	2.253	14.2018	-15.1584	0.15601	-0.11231	0.13916	-0.117000000000001	80.171	1219.223	-1.9507	0.75342	-0.30273	-1.349	-50.4505	139.941	-0.1709	0.088867	-0.2041
0.626	-48.713	186.4389	902.586	-1.5882	0.61748	-0.33223	-32.498	228.604	772.0782	-1.2983	0.52392	-0.19395	-67.0603	-169.289	1483.955	-2.5567	1.1485	-0.469	-63.9917	50.369	-0.82562	0.05542	-0.050782	0.015137	0.0280000000000022	-7.00043	1.434	0.16162	-0.12744	0.14063	40.0122	147.868	1171.69233	-1.8828	0.71484	-0.29688	-15.951	-43.9285	167.529	-0.25781	0.11035	-0.229
0.628	-68.151	157.974	882.365	-1.5329	0.60683	-0.30986	-38.414	179.211	746.45688	-1.2376	0.49043	-0.18848	-37.698	-104.907	1479.682	-2.584	1.1968	-0.47559	-60.4809	22.8542	18.0045	0.075195	-0.069824	-0.0053711	16.456	23.1445	-0.0176999999999996	0.16992	-0.14453	0.15137	21.476	92.023	1149.2991	-1.8438	0.69629	-0.29297	28.073	-46.637	238.8909	-0.32983	0.12646	-0.24854
0.63	-32.877	215.185	858.373	-1.4766	0.58984	-0.29004	-26.814	178.421	715.927	-1.1812	0.45557	-0.18652	-31.4154	-131.627	1474.47	-2.603	1.2524	-0.47656	-28.378	25.687	1.9894	0.10498	-0.090332	-0.039551	18.488	18.4309	13.0233	0.17529	-0.15723	0.15088	20.171	123.0849	1137.9345	-1.7725	0.67578	-0.28711	18.756	33.1633	301.0411	-0.41162	0.14404	-0.26514
0.632	-30.3582	203.425	829.71	-1.4197	0.56484	-0.26993	-44.1663	187.508	679.018	-1.1223	0.42891	-0.1834	-1.74	-119.832	1496.841	-2.6101	1.2893	-0.4729	-56.6903	21.47824	-11.672	0.11572	-0.1001	-0.051758	28.73	50.12	25.5831	0.19043	-0.17188	0.15918	48.4702	175.288	1095.0485	-1.7234	0.6604	-0.28394	16.939	57.7716	398.632	-0.53467	0.17871	-0.28906
0.634	10.5269	198.268	828.67	-1.3656	0.5418	-0.25039	-1.012	131.34	686.569	-1.0656	0.39951	-0.1793	23.3077	-42.4198	1492.327	-2.6055	1.3145	-0.46777	-17.516	11.9171	7.60577	0.1333	-0.1167	-0.082031	3.954	68.126	1.3815	0.20459	-0.18237	0.15503	43.3863	105.989	1094.28776	-1.6758	0.64648	-0.27686	38.104	90.2716	512.074	-0.60352	0.19385	-0.29688
0.636	8.3661	246.828	771.0477	-1.3093	0.52617	-0.22891	-8.911	194.245	634.2825	-1.0104	0.37139	-0.16992	-11.5948	-75.534	1490.799	-2.5898	1.3379	-0.46533	-27.688	28.262	12.1725	0.14453	-0.12549	-0.098875	-29.9496	42.338	2.8954	0.21484	-0.19678	0.15771	52.3865	168.535	1073.2876	-1.6074	0.62012	-0.27051	-21.33	133.93	587.816	-0.771	0.23779	-0.30664
0.638	-58.425	213.2347	712.544	-1.2533	0.51357	-0.21465	-39.886	191.798	613.2902	-0.95762	0.34307	-0.16992	-6.633	-20.9496	1471.68	-2.5757	1.3462	-0.4624	-59.04822	4.242	33.20628	0.15283	-0.13379	-0.12061	-11.71	64.971	15.0658	0.23438	-0.21094	0.15186	39.3089	159.867	1035.8118	-1.5698	0.60693	-0.26318	-21.1667	70.451	649.576	-0.91773	0.27319	-0.3059
0.64	-41.36	250.3688	684.367	-1.1987	0.5083	-0.19971	4.415	179.6606	584.348	-0.89893	0.31641	-0.1626	17.268	6.539	1409.862	-2.5581	1.3481	-0.45166	11.604	-13.679	65.0993	0.15625	-0.14307	-0.15039	-28.61	49.783	6.4506	0.24658	-0.21826	0.14795	21.341	151.7196	1013.1176	-1.498	0.57031	-0.25195	7.05	60.677	702.015	-1.0776	0.31885	-0.29736
0.642	-76.686	257.505	628.175	-1.1412	0.51191	-0.18828	-1.756	222.372	529.762	-0.84522	0.29189	-0.16133	37.051	-45.4739	1415.927	-2.5486	1.3303	-0.44458	-21.108	-17.913	66.2184	0.15918	-0.14648	-0.17188	-27.342	22.5761	27.248	0.25732	-0.23242	0.13379	51.6048	236.899	953.096	-1.4402	0.54273	-0.24341	-5.044	18.017	741.932	-1.3081	0.39111	-0.27539
0.644	-63.089	190.7979	632.6151	-1.0851	0.51758	-0.17627	5.709	141.758	515.3619	-0.78799	0.27031	-0.15303	61.6306	35.8371	1430.9139	-2.5386	1.313	-0.43408	-35.7959	-44.713	86.01347	0.146	-0.14453	-0.20313	9.732	45.782	18.61866	0.26538	-0.23926	0.12817	17.563	187.275	917.1599	-1.3862	0.51318	-0.23779	21.181	-72.269	775.341	-1.4292	0.43701	-0.26611
0.646	-23.042	211.584	596.0352	-1.0289	0.51211	-0.15908	27.289	157.747	485.39312	-0.73603	0.24883	-0.14639	56.682	12.8329	1415.615	-2.5366	1.2856	-0.41895	48.4735	-24.899	120.334	0.12402	-0.12988	-0.2373	-29.92	17.8661	4.8868	0.27148	-0.24658	0.12158	9.784	184.125	880.845	-1.3164	0.46973	-0.21533	12.779	-55.788	760.6906	-1.6655	0.52979	-0.23877
0.648	-58.158	165.7008	558.9177	-0.96572	0.50244	-0.15068	18.855	180.63	443.2525	-0.68789	0.22324	-0.14287	45.2349	4.6867	1425.568	-2.5273	1.2734	-0.41064	-1.903	-15.964	133.1575	0.10498	-0.12012	-0.25	-9.399	27.3582	29.1239	0.26758	-0.25	0.1167	13.734	214.612	853.6362	-1.2793	0.4502	-0.20898	-4.09694	-118.092	728.3696	-1.8921	0.64307	-0.21777
0.65	-25.7325	167.2836	542.458	-0.90088	0.48877	-0.14307	56.5095	140.458	427.4761	-0.63916	0.20752	-0.13428	39.3493	52.635	1403.24	-2.519	1.2524	-0.39209	34.959	-26.08	181.2913	0.053711	-0.097168	-0.27344	4.078	37.7199	20.8292	0.26953	-0.24805	0.10742	-16.057	146.183	840.7878	-1.2129	0.41797	-0.2002	16.8968	-144.937	740.4297	-1.9961	0.70898	-0.22559
0.652	-36.738	210.512	512.24081	-0.84228	0.46357	-0.12666	44.097	199.625	375.3257	-0.58984	0.18184	-0.12588	17.833	-27.2825	1428.107	-2.5083	1.2353	-0.38232	75.4928	-10.97204	221.2653	0.0029295	-0.077148	-0.28858	-19.786	1.976	36.7515	0.26416	-0.24951	0.10059	-4.465	221.481	815.12	-1.1587	0.39307	-0.19092	-19.951	-90.042	747.5667	-2.1362	0.84619	-0.23877
0.654	-43.146	166.62	498.068	-0.78769	0.43545	-0.11738	28.383	170.397	341.724	-0.54677	0.16347	-0.11718	43.449	4.3386	1446.7493	-2.4941	1.2207	-0.3623	26.269	-4.4599	278.8956	-0.069336	-0.054199	-0.30566	14.608	34.40196	38.342	0.25171	-0.24316	0.092041	-40.5604	218.794	781.92692	-1.1074	0.36621	-0.18408	-21.1484	-106.531	809.7183	-2.1657	0.95044	-0.26538
0.656	20.5833	188.229	467.4737	-0.73613	0.40654	-0.10449	61.9634	142.0376	340.99	-0.49677	0.13965	-0.10938	23.4431	26.5721	1408.39387	-2.4585	1.1938	-0.35107	58.118	40.9717	354.4911	-0.17383	-0.01416	-0.3291	-33.0754	20.4057	20.78672	0.24023	-0.23535	0.083984	-38.971	193.7621	743.1587	-1.0376	0.32959	-0.17334	-14.4783	-75.078	849.43023	-2.1284	1.0435	-0.28662
0.658	-13.2452	182.68	427.6355	-0.69209	0.38233	-0.092871	64.6761	173.321	319.499	-0.45586	0.11699	-0.10254	-8.298	-26.019	1430.495	-2.4429	1.1841	-0.34277	32.702	117.9623	423.0458	-0.23438	0.011719	-0.34082	-14.873	1.0545	36.831	0.22656	-0.21631	0.077148	-14.063	254.18	707.677	-0.99951	0.30811	-0.16553	-95.698	-93.415	854.626	-1.9824	1.1406	-0.3252
0.66	-20.7517	146.241	414.825	-0.64258	0.36279	-0.078613	66.7948	134.54	317.9724	-0.4165	0.09668	-0.095215	-2.703	57.921	1416.794	-2.4097	1.146	-0.32861	27	135.661	539.872	-0.37158	0.061035	-0.35693	9.095	21.2452	41.149	0.22461	-0.20996	0.070801	-42.2183	171.938	700.154	-0.93555	0.26855	-0.1543	-109.925	-161.231	880.397	-1.8906	1.1777	-0.34912
0.662	-3.5545	190.16	388.216	-0.60225	0.33916	-0.077246	64.7247	160.915	296.0316	-0.37539	0.070605	-0.09375	-22.4382	13.0423	1374.792	-2.3789	1.1133	-0.32129	31.243	138.335	629.698	-0.48853	0.10401	-0.36743	-22.729	-9.6582	38.3706	0.21729	-0.18262	0.060547	-27.596	183.504	683.38	-0.88965	0.24219	-0.14429	-96.22	-124.432	893.857	-1.6992	1.1992	-0.39844
0.664	-49.8395	162.992	372.561	-0.56328	0.3208	-0.074414	6.113	158.069	253.795	-0.34072	0.054297	-0.091504	-43.1373	-0.2476	1369.359	-2.3438	1.0801	-0.31689	-12.705	104.224	670.77512	-0.60938	0.15137	-0.36914	8.993	7.3978	41.924	0.21314	-0.1643	0.048828	-22.58	203.426	638.843	-0.8418	0.21924	-0.13525	-37.4437	-120.758	913.66	-1.5737	1.1572	-0.42823
0.666	-18.2319	171.451	341.39267	-0.52227	0.30635	-0.071679	51.08	112.6666	249.6402	-0.30088	0.030469	-0.091113	-37.7282	80.656	1329.388	-2.2964	1.0317	-0.30225	2.643	33.3507	730.664	-0.78125	0.22656	-0.35938	1.694	18.2492	16.8046	0.2124	-0.14795	0.045898	-28.662	141.9698	617.7139	-0.77734	0.19727	-0.12744	-11.143	-94.113	949.1776	-1.4683	1.0659	-0.44824
0.668	-28.5343	185.756	286.5721	-0.4792	0.29219	-0.066113	34.821	153.126	219.5661	-0.26367	0.0097654	-0.085254	-61.1506	24.793	1328.43	-2.271	1.0063	-0.29248	23.002	5.651	778.818	-0.87939	0.26221	-0.35107	-8.976	-2.3305	30.6484	0.21289	-0.12012	0.026855	-14.027	212.356	584.653	-0.75146	0.18799	-0.12158	-28.813	-35.72	927.318	-1.3745	0.86963	-0.46143
0.67	-53.57	128.02	262.432	-0.43359	0.27783	-0.061035	12.119	118.637	199.073	-0.23291	-0.013184	-0.087891	-67.331	92.252	1318.224	-2.2207	0.95313	-0.28125	28.55	-45.194	822.628	-1.082	0.34326	-0.31787	27.683	22.723	29.905	0.21191	-0.10352	0.018066	-10.601	176.625	558.7345	-0.6875	0.17676	-0.11914	-21.636	-112.825	930.953	-1.3472	0.76221	-0.4624
0.672	-12.329	138.7949	267.1644	-0.39931	0.26338	-0.05625	11.472	91.8266	210.7634	-0.20371	-0.032324	-0.078223	-54.531	126.749	1289.226	-2.1814	0.91577	-0.26611	59.894	-85.988	809.416	-1.2502	0.41822	-0.28174	11.558	15.5316	-4.67335	0.21533	-0.081055	-0.0019531	14.09	148.45	528.5681	-0.63941	0.16162	-0.10913	-10.934	-146.462	960.489	-1.3179	0.56299	-0.46436
0.674	-42.9176	136.353	248.2474	-0.36319	0.2458	-0.056543	-47.2404	118.869	194.663	-0.17187	-0.057129	-0.083594	-55.019	77.197	1286.0782	-2.1421	0.88135	-0.25439	2.76	-99.85	753.1157	-1.439	0.50049	-0.2373	4.178	7.7835	-0.7193	0.20947	-0.064697	-0.015381	12.759	198.102	493.8982	-0.58887	0.14502	-0.10449	-2.688	-165.733	1015.368	-1.323	0.44702	-0.46118
0.676	-29.1515	105.96	231.5611	-0.33232	0.23526	-0.051074	-31.2214	69.738	180.725	-0.14531	-0.073145	-0.078516	-45.9996	153.602	1270.032	-2.0894	0.84521	-0.24365	8.346	-165.2252	733.8674	-1.7622	0.63818	-0.20068	25.266	26.656	-7.17747	0.2124	-0.047363	-0.030273	6.758	142.31	469.831	-0.53369	0.11865	-0.089844	21.585	-243.139	1109.5511	-1.3403	0.36035	-0.45947
0.678	-4.763	139.318	201.53	-0.30605	0.21982	-0.043164	-3.849	96.705	154.0241	-0.12236	-0.091308	-0.082129	-80.1786	122.447	1224.3522	-2.0566	0.82813	-0.24854	34.766	-189.079	759.1164	-1.9351	0.73096	-0.19092	-17.689	-5.59799	-4.8596	0.20215	-0.026855	-0.053223	19.978	178.1527	444.346	-0.50586	0.10449	-0.085938	-11.355	-209.53	1157.65	-1.4146	0.31494	-0.43994
0.68	-39.9206	116.271	169.0116	-0.27686	0.20557	-0.038574	-47.548	95.871	132.0427	-0.10645	-0.10693	-0.07959	-64.4431	123.523	1210.0978	-1.9883	0.80176	-0.23828	-42.8293	-138.47	786.2393	-2.2363	0.92969	-0.18408	6.717	-7.1959	20.9212	0.19824	-0.010742	-0.063477	44.407	197.951	401.663	-0.45264	0.075684	-0.070801	-72.907	-222.973	1154.06	-1.4609	0.3125	-0.42188
0.682	-9.513	115.277	167.051	-0.25634	0.19541	-0.030176	-15.303	58.731	127.3226	-0.091309	-0.12314	-0.077539	-30.298	188.05	1185.6191	-1.9346	0.77685	-0.23487	-11.213	-120.723	864.84	-2.364	1.0564	-0.18897	18.557	5.0071	15.2524	0.18408	0.0087891	-0.083008	56.91	140.0529	376.9947	-0.41944	0.053467	-0.06543	-67.792	-229.984	1186.673	-1.5918	0.38135	-0.39063
0.684	-14.951	146.643	147.554	-0.23828	0.17881	-0.02832	-37.036	104.419	104.5276	-0.07832	-0.13262	-0.075293	-30.5447	115.1767	1195.15017	-1.877	0.75586	-0.23047	-11.534	-81.215	859.932	-2.3926	1.1738	-0.2041	-8.09	-14.9597	29.178	0.17334	0.025879	-0.099119	53.185	170.142	336.3557	-0.39014	0.035645	-0.059082	-49.4605	-144.835	1218.735	-1.7002	0.46826	-0.37109
0.686	-51.713	119.739	152.41881	-0.21641	0.16162	-0.02207	-45.41171	82.967	101.746	-0.069727	-0.13887	-0.069824	7.685	142.867	1191.087	-1.8003	0.72119	-0.22266	-105.898	-111.142	868.029	-2.2598	1.2969	-0.22949	24.648	7.1727	28.544	0.1582	0.040039	-0.10986	64.59909	143.295	323.962	-0.34717	0.013184	-0.049805	-32.1587	-132.928	1291.975	-1.8071	0.57568	-0.35352
0.688	-0.353999999999999	119.666	151.316	-0.19873	0.14619	-0.017481	-26.5172	59.0242	120.471	-0.062891	-0.14883	-0.063281	9.437	125.089	1156.035	-1.7671	0.70557	-0.22021	-70.907	-154.068	895.8884	-2.1538	1.3462	-0.25293	-26.389	2.3958	-9.2055	0.13721	0.069824	-0.12012	47.41	132.20851	337.39908	-0.32422	9.3678e-14	-0.043457	28.081	-89.981	1354.9718	-1.9414	0.7207	-0.32422
0.69	-39.6936	86.4662	122.976	-0.18018	0.13477	-0.0092773	-57.317419	89.36	104.779	-0.060547	-0.15088	-0.058594	2.427	55.6583	1137.567	-1.6992	0.66211	-0.20898	-36.064	-118.445	919.2502	-1.8999	1.4165	-0.31787	-19.517	-3.89609	-8.9617	0.12793	0.081055	-0.12695	64.9962	183.737	301.2835	-0.28809	-0.022949	-0.039551	19.6791	-63.375	1348.005	-2.0073	0.79443	-0.30811
0.692	-51.3848	48.421	108.811	-0.16601	0.12246	-0.0038086	-16.402	36.449	85.608	-0.061035	-0.15449	-0.049805	53.3423	121.272	1108.992	-1.6568	0.64014	-0.19873	-2.19900000000001	-100.239	991.184	-1.7322	1.4212	-0.36157	12.716	31.375	-12.0306	0.10791	0.10889	-0.12695	49.293	128.43818	281.3417	-0.25586	-0.042724	-0.038819	53.681	-116.539	1350.41	-2.1348	0.92578	-0.29492
0.694	-18.15	73.7973	75.025	-0.15957	0.11201	0.003125	-12.086	70.705	50.956	-0.060351	-0.15703	-0.042871	40.77	96.8634	1070.8917	-1.6089	0.61377	-0.19385	50.4	-76.11	1024.7703	-1.6011	1.3657	-0.39014	-19.055	3.7037	-16.3971	0.093995	0.12842	-0.13086	41.101	124.9751	256.5309	-0.22412	-0.060547	-0.037109	57.6658	-88.174	1362.794	-2.2342	1.0183	-0.29004
0.696	-31.441	51.241	57.973	-0.15137	0.10772	0.016016	-34.407	75.645	35.657	-0.060743	-0.1539	-0.03623	58.5305	117.9251	1054.4458	-1.5503	0.58057	-0.18799	15.088	-74.504	999.4102	-1.5015	1.1626	-0.42139	14.642	2.5467	-4.4709	0.07959	0.15234	-0.13379	45.005	139	209.727	-0.18799	-0.084961	-0.028809	63.9219	-97.257	1353.7646	-2.3301	1.0996	-0.2876
0.698	16.679	55.263	59.059	-0.14141	0.1041	0.022754	0.0670000000000002	30.59542	67.5109	-0.057422	-0.15859	-0.034375	87.543	182.022	1017.6761	-1.5156	0.56445	-0.18457	26.958	-163.482	985.176	-1.4741	1.0239	-0.43701	-18.5769	19.1517	-19.9565	0.060547	0.18164	-0.12891	24.797	82.6415	216.384	-0.16846	-0.1001	-0.027832	53.853	-123.716	1381.396	-2.4551	1.1973	-0.30664
0.7	-4.822	69.348	30.9283	-0.13574	0.10156	0.032227	7.447	46.9196	51.3076	-0.04834	-0.16309	-0.026367	51.8547	100.949	1012.2875	-1.4526	0.53271	-0.17676	62.366	-207.8965	1004.11	-1.4429	0.73486	-0.45068	-46.2547	9.7841	-0.527900000000001	0.056152	0.19287	-0.12939	-0.776	130.013	192.9822	-0.13135	-0.12402	-0.024902	-2.877	-62.443	1372.639	-2.5117	1.2373	-0.32031
0.702	-14.281	37.472	23.9714	-0.1251	0.10254	0.036621	4.942	24.0567	28.81516	-0.038965	-0.15957	-0.02041	54.4889	152.2316	992.86	-1.4106	0.51563	-0.17309	48.877	-235.574	1074.738	-1.4392	0.54175	-0.4563	8.575	53.7	16.7515	0.046387	0.22656	-0.13525	-5.891	93.9483	192.386	-0.11206	-0.13599	-0.025878	-19.5037	-77.316	1370.331	-2.5957	1.2949	-0.35254
0.704	29.345	46.7335	44.0727	-0.1082	0.098828	0.045606	40.3568	6.263	47.276	-0.025293	-0.15742	-0.01748	68.6164	175.548	961.281	-1.3687	0.49951	-0.15576	48.788	-266.962	1160.4735	-1.4604	0.38135	-0.45459	-9.789	58.265	0.0459000000000001	0.031982	0.24805	-0.13257	-4.04799999999999	51.694	204.3786	-0.094238	-0.14941	-0.02832	-20.3974	-81.681	1411.595	-2.6219	1.3171	-0.37598
0.706	4.864	48.812	28.5753	-0.086328	0.098828	0.052246	26.873	29.939	29.1505	-0.013574	-0.1539	-0.0167	79.0455	144.0735	943.78	-1.3149	0.4751	-0.15576	14.221	-209.512	1190.558	-1.5112	0.23486	-0.45068	-20.793	38.756	1.065	0.026855	0.26611	-0.13428	-2.493	90.1892	176.9473	-0.068848	-0.16602	-0.024902	-13.019	-41.4196	1436.5544	-2.6289	1.3223	-0.41309
0.708	26.874	24.6851	54.905	-0.058496	0.095019	0.05498	17.934	7.32706	46.168	0.00058594	-0.15156	-0.01543	67.97	216.874	895.554	-1.291	0.46484	-0.15332	-33.506	-214.962	1213.339	-1.5547	0.19238	-0.43945	-0.236000000000001	51.528	-13.5839	0.015625	0.29443	-0.12891	-17.731	53.0083	148.1768	-0.058594	-0.16846	-0.024902	13.84	-104.108	1472.85	-2.5913	1.3091	-0.45557
0.71	36.11	39.8907	31.377	-0.028809	0.086426	0.056152	28.896	34.913	23.584	0.015137	-0.14697	-0.014648	35.707	168.5387	846.7197	-1.2358	0.44775	-0.14697	32.41	-214.357	1247.171	-1.6602	0.18457	-0.41602	-28.1259	23.4491	-11.11083	0.012695	0.30566	-0.12793	-29.604	78.981	128.3795	-0.036133	-0.18604	-0.031738	3.63	-78.0244	1483.136	-2.5601	1.2935	-0.47998
0.712	-19.564	12.1909	21.1542	0.0030273	0.071973	0.054492	34.9671	47.309	8.13203	0.030273	-0.14571	-0.015527	49.139	149.679	804.0583	-1.1928	0.43847	-0.14502	29.312	-146.9637	1269.8337	-1.7517	0.24927	-0.4021	-13.748	26.6915	18.343	0.0092773	0.32129	-0.12402	-38.585	103.083	109.3736	-0.020996	-0.1897	-0.028076	6.953	-66.152	1454.264	-2.4883	1.2578	-0.51172
0.714	2.782	-1.381	34.571	0.027344	0.058593	0.061133	64.402	-14.9324	25.8221	0.048926	-0.14736	-0.014453	46.6291	194.553	761.997	-1.1489	0.42432	-0.13721	57.083	-146.5555	1325.2966	-1.8413	0.36084	-0.40186	6.815	40.416	11.6254	0.0068359	0.33741	-0.11817	-48.36	52.251	104.5599	-0.01123	-0.19531	-0.025879	35.732	-113.583	1472.662	-2.4414	1.2178	-0.53418
0.716	2.014	27.7705	0.3917	0.055078	0.037109	0.065429	31.265	9.694	12.2514	0.062598	-0.14619	-0.014062	15.455	132.826	759.806	-1.0854	0.40479	-0.13184	100.8058	-89.387	1330.9399	-1.9312	0.54541	-0.41748	-11.071	-2.514	22.9046	0	0.34473	-0.11719	-26.205	92.592	77.1528	0.0039063	-0.19873	-0.026367	79.19807	-41.866	1467.206	-2.3921	1.1802	-0.54834
0.718	-17.295	8.6552	11.2593	0.077735	0.013477	0.068359	-6.786	8.4028	-3.7018	0.07461	-0.15205	-0.011035	6.563	184.174	743.1019	-1.0542	0.39502	-0.12891	64.507	-62.183	1309.836	-1.9565	0.63623	-0.41455	18.31	17.40799	38.0277	-0.0063477	0.35303	-0.11475	-28.0636	52.328	68.7553	0.010742	-0.19922	-0.026855	42.277	-58.896	1458.484	-2.3296	1.1157	-0.56592
0.72	27.49	22.726	4.7997	0.088379	-0.01123	0.072754	33.245	20.4078	3.90826	0.081543	-0.15088	-0.0083008	-19.988	192.399	705.1255	-0.9873	0.37646	-0.12354	118.214	-90.174	1330.993	-2.0015	0.7915	-0.45898	-5.3	2.477	37.6482	-0.010742	0.35303	-0.11279	-29.461	31.1851	73.64508	0.028809	-0.2002	-0.020508	19.084	-52.658	1467.007	-2.3008	1.083	-0.57031
0.722	7.663	25.2096	-12.7877	0.099608	-0.032129	0.086523	8.024	59.599	4.5791	0.09082	-0.15469	-0.0052734	-29.701	142.80121	702.065	-0.94019	0.35938	-0.12061	111.4087	-47.704	1317.7893	-2.0305	0.88403	-0.4685	6.719	-22.995	73.10021	-0.021973	0.35498	-0.11475	-32.172	84.047	59.1349	0.040528	-0.19946	-0.02002	-33.287	2.025	1438.6273	-2.2461	1.0098	-0.57813
0.724	1.673	-9.3826	2.3818	0.10527	-0.057617	0.096192	12.856	-1.0182	25.319	0.094824	-0.1624	0.0043946	-4.51300000000001	188.162	660.841	-0.89063	0.33984	-0.11328	90.417	-75.066	1342.609	-2.062	0.95947	-0.4873	30.415	-4.799	79.44575	-0.038086	0.35937	-0.12402	-28.117	56.049	57.6941	0.052734	-0.19482	-0.013184	-49.9435	-43.6535	1440.4369	-2.2012	0.96045	-0.57764
0.726	37.737	17.745	7.0711	0.10645	-0.079493	0.10987	2.179	5.566	15.1838	0.096778	-0.17061	0.0067383	-33.071	126.6681	637.2017	-0.83154	0.31982	-0.11035	105.474	-90.8772	1352.696	-2.1323	1.0396	-0.50928	-19.167	-36.398	124.0771	-0.053711	0.35742	-0.13574	-22.021	73.678	54.2705	0.066406	-0.19385	-0.015625	-7.871	13.3227	1438.2676	-2.1621	0.91602	-0.57422
0.728	-11.641	5.8691204	15.357	0.10586	-0.10488	0.11797	-42.5628	23.7697	-5.5103	0.097461	-0.17168	0.009961	-42.078	130.04819	629.42	-0.80322	0.30908	-0.10156	9.361	-16.265	1336.472	-2.1699	1.0625	-0.52002	17.387	-61.645	199.166	-0.086426	0.37061	-0.13916	-7.072	75.354	27.4546	0.069824	-0.19043	-0.015137	-9.77	51.572	1401.7444	-2.1187	0.86768	-0.58252
0.73	21.184	13.9793	45.3301172	0.10205	-0.12402	0.13135	1.569	14.3087	16.9548	0.10254	-0.17578	0.013672	-17.574	186.689	581.5669	-0.74561	0.29346	-0.095215	6.399	-50.428	1374.7998	-2.2554	1.0962	-0.54053	17.1605	-75.905	252.2045	-0.10889	0.36914	-0.14551	5.815	6.8249	42.6631	0.079102	-0.18457	-0.01709	3.311	-5.19	1419.8962	-2.0991	0.85205	-0.5835
0.732	-6.848	53.677	14.04101	0.099414	-0.13603	0.1417	-29.444	55.893	18.6931	0.10381	-0.17568	0.01416	-26.897	117.4103	544.2446	-0.70385	0.27222	-0.093994	28.288	-43.505	1430.2088	-2.3115	1.1147	-0.55322	-49.869	-108.394	359.585	-0.16943	0.36963	-0.16992	14.863	50.513	32.269	0.08252	-0.18262	-0.0087891	-17.915	63.596	1402.786	-2.0522	0.81885	-0.58789
0.734	-33.7814	33.4682	11.49018	0.10235	-0.15381	0.15351	-70.953	26.173	9.2264	0.10722	-0.17881	0.017773	-12.246	157.392	523.4891	-0.66357	0.25684	-0.085938	23.019	-44.2474	1461.478	-2.3477	1.1152	-0.56104	-49.1954	-81.59	486.641	-0.22412	0.37207	-0.19068	24.7321	26.496	11.0488	0.085449	-0.18457	-0.010254	-19.421	44.2367	1383.189	-2.02	0.8042	-0.59424
0.736	-10.389	48.205	20.0786	0.097656	-0.16631	0.16054	-31.964	1.1099	0.639999999999999	0.11152	-0.17803	0.019727	-14.409	162.851	490.6167	-0.6123	0.23486	-0.077637	61.392	-124.536	1493.476	-2.3652	1.1104	-0.57666	-106.292	-69.851	578.105	-0.2915	0.36963	-0.21484	25.969	16.7393	21.4062	0.078613	-0.1748	-0.0053711	16.379	40.678	1390.925	-1.9902	0.78711	-0.5918
0.738	-40.805	47.162	6.96687	0.10263	-0.17988	0.16992	-40.8574	26.70751	-8.0452	0.11221	-0.17617	0.02041	8.391	130.503	458.4799	-0.59033	0.22607	-0.072754	48.741	-86.4386	1486.353	-2.3574	1.1055	-0.59082	-113.378	-61.737	634.9192	-0.40186	0.37646	-0.24951	27.1435	53.066	8.1369	0.074463	-0.17334	-0.0021973	55.866	121.257	1364.968	-1.9473	0.75977	-0.5918
0.74	-14.62	15.2607	23.5195	0.10986	-0.19141	0.18164	-28.64404	-4.399	30.716	0.11768	-0.17529	0.020996	33.45	188.304	424.3093	-0.54297	0.20215	-0.066895	33.808	-80.582	1464.042	-2.3145	1.0977	-0.61328	-91.026	-20.514	664.987	-0.46826	0.38086	-0.2627	42.0376	2.18581	21.50556	0.06543	-0.17139	0	74.2043	45.6889	1391.4855	-1.9336	0.75	-0.58496
0.742	-9.179	21.0971	12.681	0.12012	-0.20225	0.18789	-19.257	21.638	46.198	0.12041	-0.17861	0.018555	11.003	148.604	412.697	-0.50415	0.18335	-0.062744	78.851	-92.8658	1475.298	-2.2634	1.093	-0.62769	-67.876	-54.186	708.748	-0.63037	0.40771	-0.27344	46.624	13.1042	33.7871	0.050293	-0.17188	0.010254	64.742	60.288	1383.174	-1.9082	0.72266	-0.58008
0.744	-27.145	6.3016	10.6893	0.11933	-0.21279	0.19863	-46.3259	42.316	32.9493	0.125	-0.17656	0.018164	12.566	145.6145	387.256	-0.46436	0.16211	-0.057617	84.967	-13.279	1436.4806	-2.2109	1.0801	-0.64209	25.979	-76.78054	816.883	-0.7727	0.43677	-0.26587	31.816	20.5787	15.60819	0.040039	-0.16992	0.013672	44.375	74.387	1329.6552	-1.8914	0.71656	-0.57397
0.746	9.909	-8.14906	25.196	0.12793	-0.21592	0.2002	-13.587	14.8085	12.1295	0.12305	-0.18125	0.02207	44.098	187.031	339.6085	-0.41406	0.13428	-0.052734	76.967	-69.912	1457.9452	-2.1387	1.0488	-0.66406	-0.149000000000001	-54.428	833.763	-0.91357	0.46582	-0.24951	23.404	-0.5966	35.086	0.026855	-0.16553	0.020996	39.759	14.744	1335.019	-1.8745	0.71533	-0.57129
0.748	-8.78	29.2674	15.2722	0.13496	-0.21992	0.20137	-23.078	51.462	-10.1815	0.12383	-0.18057	0.019238	51.286	133.8489	332.708	-0.39014	0.1167	-0.049805	66.776	-58.91	1437.55424	-2.1113	1.0273	-0.6665	-23.508	-45.041	823.463	-1.1191	0.49707	-0.20166	27.083	53.442	23.6432	0.012695	-0.15869	0.031005	63.7113	89.18796	1328.1582	-1.8496	0.72266	-0.55664
0.75	-20.416	16.534	25.54076	0.13965	-0.21924	0.19971	-13.058	23.4582	7.4605	0.12354	-0.18262	0.02002	65.8	175.315	306.54	-0.34375	0.087402	-0.04248	7.229	-21.21	1423.4089	-2.0737	0.98291	-0.66553	69.659	-16.3667	830.57	-1.2859	0.51343	-0.17505	4.287	24.381	1.1353	-0.0019531	-0.15283	0.042969	36.245	73.739	1300.6579	-1.8335	0.72314	-0.54443
0.752	29.167	30.2179	28.124	0.14971	-0.21553	0.196	14.679	-2.9311	33.6693	0.11533	-0.1832	0.016211	53.3566	155.782	294.3584	-0.31421	0.064453	-0.042236	23.171	-28.5936	1427.2924	-2.0611	0.94825	-0.65967	28.076	4.12	774.431	-1.4663	0.5376	-0.15869	11.554	14.0871	9.15133	-0.019531	-0.13672	0.054688	30.848	65.28	1290.805	-1.8105	0.72656	-0.53125
0.754	-11.561	39.14942	11.2203	0.15811	-0.21397	0.18974	-13.728	31.8103	12.1535	0.10596	-0.18349	0.022949	51.455	116.5574	303.3223	-0.28271	0.041504	-0.046387	30.703	59.8346	1421.6044	-2.0601	0.9126	-0.65186	44.208	-0.221999999999994	778.91423	-1.6914	0.59912	-0.15234	13.091	35.951	-8.1653	-0.028809	-0.12842	0.061523	20.471	123.795	1240.316	-1.7774	0.73022	-0.51343
0.756	-11.679	11.494	31.524	0.17334	-0.22022	0.18545	13.053	12.735	10.01869	0.090723	-0.18077	0.022559	85.2092	178.16	269.271	-0.24268	0.019531	-0.035645	6.614	74.6404	1421.2465	-2.0654	0.88672	-0.64014	96.214	-0.751999999999995	745.964	-1.7964	0.64209	-0.16064	-7.426	1.74718	0.2724	-0.040527	-0.11523	0.072754	16.158	60.565	1222.597	-1.7378	0.73682	-0.49756
0.758	32.447	22.0869	36.702	0.18926	-0.22373	0.18008	40.2652	31.2657	17.3647	0.075098	-0.18233	0.027832	79.613	123.884	238.6673	-0.2251	0.01123	-0.035156	45.799	23.354	1425.079	-2.0684	0.87891	-0.63086	34.616	-32.466	744.4337	-1.978	0.73682	-0.18115	-13.357	25.749	35.283	-0.046875	-0.1001	0.07666	43.971	106.749	1219.2546	-1.6851	0.7417	-0.47998
0.76	-25.429	10.9558	21.7091	0.2085	-0.23096	0.17871	18.938	34.1606	33.388	0.053223	-0.17627	0.029785	75.1639	97.158	242.9034	-0.18701	-0.0092773	-0.032715	26.217	76.1529	1369.4794	-2.0684	0.85449	-0.61816	26.244	-73.449	799.5	-2.0438	0.81323	-0.18286	-41.7901	48.238	30.8434	-0.055664	-0.083496	0.084473	39.112	140.263	1171.7068	-1.6538	0.74463	-0.47314
0.762	11.772	-0.4515	43.9916	0.22031	-0.2376	0.16836	35.934	5.036	31.48233	0.02793	-0.16768	0.03291	41.18	116.058	199.4755	-0.16235	-0.02417	-0.033203	39.918	28.61	1374.82478	-2.0605	0.85009	-0.61084	-0.102	-76.94	818.742	-2.0625	0.87891	-0.17871	-37.666	8.6737	37.9025	-0.054688	-0.069824	0.092285	41.148	88.786	1154.5878	-1.5835	0.74268	-0.45654
0.764	6.964	28.2131	9.0736	0.22539	-0.24473	0.15068	27.087	41.639	6.3888	0.0078121	-0.15674	0.034278	11.576	55.948	194.245	-0.14453	-0.037109	-0.027832	92.465	49.13	1406.0036	-2.0444	0.84229	-0.60303	-5.349	-89.217	853.8706	-2.0327	0.95361	-0.18945	-23.404	40.615	24.9765	-0.054688	-0.064453	0.095215	38.663	155.904	1130.8284	-1.5264	0.73437	-0.44141
0.766	-10.836	4.4166	14.1402	0.22891	-0.24278	0.13701	24.4385	37.2152	9.0684	-0.015625	-0.14463	0.03584	24.985	102.909	185.1161	-0.11035	-0.049316	-0.027344	85.53	91.8278	1374.8695	-2.0171	0.83154	-0.59131	105.2112	-96.718	864.374	-2.0078	0.98633	-0.20068	-23.6214	12.2864	10.2317	-0.051758	-0.062988	0.10352	42.0447	134.669	1097.9874	-1.4707	0.72266	-0.42578
0.768	28.607	26.59	28.48	0.23633	-0.24512	0.12285	56.422	4.0131	47.32	-0.036035	-0.13271	0.039844	11.9632	98.703	181.886	-0.098633	-0.055176	-0.024902	94.412	17.555	1380.2572	-2.0039	0.82422	-0.57617	113.929	-113.252	820.338	-1.9199	1.0293	-0.23633	-48.4685	5.3403	27.17	-0.046143	-0.059815	0.10424	44.242	118.338	1086.3148	-1.396	0.70459	-0.40771
0.77	1.925	40.534	3.652	0.24072	-0.24365	0.10596	10.001	15.78127	30.3257	-0.058594	-0.11816	0.043945	8.058	54.5025	203.396	-0.078125	-0.069824	-0.024414	98.369	33.741	1340.366	-1.9761	0.81592	-0.57617	86.6253	-180.0372	828.081	-1.8545	1.0263	-0.26221	-28.209	41.196	11.9655	-0.035645	-0.063477	0.10645	5.553	177.287	1051.4052	-1.3574	0.69043	-0.39258
0.772	33.365	11.871	22.5515	0.23916	-0.23858	0.092871	20.392	-15.879	13.29495	-0.078028	-0.095019	0.050488	-2.764	99.527	168.441	-0.064209	-0.077636	-0.022705	56.916	14.9892	1323.8381	-1.9528	0.80396	-0.56445	91.086	-217.528	867.503	-1.7944	0.99854	-0.27441	-25.359	0.006154	21.756	-0.026367	-0.071777	0.11035	-11.697	107.835	1038.744	-1.2871	0.66211	-0.36621
0.774	14.563	25.992	12.7136	0.23848	-0.22989	0.075	32.797	10.56421	9.1836	-0.092481	-0.083691	0.049902	-30.945	77.481	124.5529	-0.053223	-0.087891	-0.018066	98.2463	-10.349	1341.5417	-1.9336	0.78711	-0.55225	74.1314	-258.078	935.299	-1.7363	0.90039	-0.27832	-39.524	6.1736	25.22063	-0.018066	-0.075195	0.098633	-31.278	126.934	1020.345	-1.2419	0.64331	-0.34228
0.776	-29.399	13.8849	-1.1056	0.23457	-0.21699	0.05625	-1.769	36.864	6.1003	-0.10928	-0.059473	0.0542	-34.174	88.955	114.4127	-0.040039	-0.098145	-0.014648	63.188	84.058	1320.302	-1.9097	0.76416	-0.53857	81.7693	-327.156	1029.76	-1.7144	0.83057	-0.27588	-17.207	12.7049	17.56557	-0.0024414	-0.087402	0.10498	-50.4963	141.91006	957.532	-1.2012	0.62695	-0.3208
0.778	22.9823	4.19968	15.889	0.22773	-0.20185	0.034668	5.363	-0.70712	37.738	-0.12334	-0.042188	0.058594	-44.06	105.777	105.037	-0.023926	-0.10693	-0.0097658	41.278	55.258	1294.188	-1.8965	0.75	-0.52441	53.5284	-321.669	1054.234	-1.6929	0.6792	-0.29053	-24.809	-22.7549	29.84483	0.0085448	-0.095947	0.10865	-26.533	78.313	934.7592	-1.1499	0.60596	-0.29199
0.78	18.095	20.498	20.4541	0.22217	-0.18457	0.02002	-6.633	33.553	21.6673	-0.13525	-0.017578	0.062012	-43.334	45.07259	110.9763	-0.016113	-0.11133	-0.0063477	59.411	54.253	1266.807	-1.8706	0.71729	-0.50342	-21.1028	-342.817	1057.211	-1.6961	0.57568	-0.31079	-15.243	31.006	21.8334	0.017578	-0.10205	0.10742	-18.079	146.586	899.623	-1.1284	0.59912	-0.28662
0.782	-26.185	-13.4548	26.3182	0.21104	-0.16211	-0.0045898	-31.29965	20.97994	9.29023	-0.14336	0.0012695	0.065332	-44.09	71.272	71.0893	0.0019531	-0.11523	-0.003418	-3.778	89.803	1213.106	-1.8428	0.69727	-0.48779	-15.274	-334.943	1092.1054	-1.707	0.49414	-0.3291	-2.012	22.9562	10.1373	0.025879	-0.11914	0.11182	-35.3331	124.3123	864.031	-1.0737	0.57861	-0.25342
0.784	13.884	3.6346	39.025	0.20029	-0.1377	-0.022949	-1.773	0.0182000000000002	31.8916	-0.14726	0.020215	0.065625	-43.3931	57.709	41.4847	0.0092773	-0.12061	-0.0024414	28.331	47.605	1208.357	-1.8203	0.68164	-0.47852	-44.7922	-227.828	1092.468	-1.75	0.42773	-0.34326	-3.438	15.9284	21.9525	0.024902	-0.12305	0.11035	-42.527	121.8673	839.074	-1.0358	0.56323	-0.23681
0.786	-18.97	25.9713	7.199	0.18857	-0.11387	-0.042871	-27.762	33.8567	24.1917	-0.14726	0.039356	0.070312	-38.383	32.9707	76.959	0.029297	-0.12549	-0.0014648	56.227	136.362	1174.257	-1.7788	0.67627	-0.46338	-52.972	-176.339	1153.828	-1.7808	0.41357	-0.3501	15.316	47.893	2.41946	0.020508	-0.13037	0.11328	-16.911	203.544	800.9507	-0.99609	0.5498	-0.21924
0.788	-21.7181	19.2558	-2.6271	0.17744	-0.092091	-0.056934	-40.155	-2.8512	15.1623	-0.14482	0.055078	0.068555	-51.51883	79.263	67.095	0.042969	-0.12744	0.001709	25.474	158.741	1138.795	-1.7456	0.67432	-0.4585	-22.382	-126.414	1207.838	-1.8647	0.43213	-0.37061	27.813	8.0108	1.5476	0.012451	-0.13745	0.11865	20.99	147.294	794.208	-0.93896	0.53662	-0.19678
0.79	6.84	42.862	8.8462	0.15771	-0.060059	-0.069336	-41.955	22.1509	-7.19926	-0.13672	0.068848	0.062988	-49.6397	42.4635	54.3872	0.061523	-0.12891	0.0019531	43.608	130.093	1135.3736	-1.6812	0.66846	-0.44531	-62.631	-95.069	1213.115	-1.9333	0.49243	-0.39575	38.454	15.176	6.2915	0.0039063	-0.13965	0.12109	33.008	191.174	758.856	-0.91162	0.52588	-0.19385
0.792	-31.9916	15.6139	4.56055	0.13369	-0.036914	-0.081446	-59.8964	44.322	-2.2065	-0.12441	0.075293	0.057617	-22.987	50.0731	32.946	0.078125	-0.13232	0.0019531	36.138	185.276	1088.823	-1.6108	0.65234	-0.43896	-38.7533	-130.425	1250.847	-2.002	0.57227	-0.41602	34.0459	30.101	5.1467	-0.0087891	-0.1416	0.12695	16.0935	211.601	712.79	-0.86035	0.50781	-0.1748
0.794	12.744	-0.0311999999999992	16.9513	0.11104	-0.0076168	-0.088769	-24.7985	0.0660999999999996	29.612	-0.11367	0.082325	0.050879	4.427	59.642	20.1223	0.083496	-0.13525	-0.00097656	34.406	135.799	1076.5393	-1.5742	0.64258	-0.43408	-19.219	-73.391	1261.0701	-2.0835	0.70166	-0.44873	22.1401	2.5907	29.06226	-0.016113	-0.13525	0.125	-9.909	141.3757	695.0283	-0.81006	0.49072	-0.15479
0.796	0.0519999999999996	23.0484	-5.30102	0.092286	0.022851	-0.10049	-17.487	25.683	27.929	-0.10039	0.080371	0.042676	5.205	-8.117	56.734	0.096191	-0.1416	0.0024414	55.69	137.629	1074.53753	-1.5137	0.62256	-0.41797	-51.6969	-45	1282.987	-2.123	0.75977	-0.46484	35.86166	39.179	34.592	-0.032715	-0.12842	0.12695	-26.6151	196.954	647.31543	-0.7793	0.47949	-0.14795
0.798	-41.6168	-0.4557	9.70379	0.067285	0.054492	-0.10576	-42.21234	-3.82796	11.8261	-0.076953	0.076563	0.033301	2.57	19.4485	51.486	0.10401	-0.14673	0.0053711	0.329999999999998	152.52	1044.3623	-1.4736	0.61084	-0.40527	-21.134	-55.112	1347.647	-2.1934	0.88184	-0.50488	16.3463	14.0266	9.632	-0.038086	-0.12256	0.12622	-37.11861	148.065	618.573	-0.73096	0.45605	-0.13428
0.8	10.084	22.107	35.6148	0.053223	0.083008	-0.11768	-20.419	0.4888	9.2303	-0.056641	0.070801	0.026367	19.1676	9.1551	11.32	0.11182	-0.14795	0.0048828	-33.864	88.463	1032.34949	-1.439	0.60693	-0.38818	-45.735	-36.165	1343.573	-2.2419	0.95874	-0.51831	32.35	-20.0605	18.0275	-0.039551	-0.11279	0.12207	-10.043	133.335	601.155	-0.68872	0.43604	-0.12549
0.802	-24.272	36.688	22.6106	0.04043	0.11846	-0.12256	-18.317	48.627	4.4955	-0.036719	0.058887	0.01709	40.124	-17.6344	25.3154	0.11523	-0.15674	0.012695	-49.4899	135.093	998.172	-1.3989	0.59424	-0.36719	-83.375	-105.483	1375.246	-2.2983	1.0356	-0.54443	37.341	24.3458	3.6515	-0.046875	-0.09668	0.12256	0.201999999999998	196.33	544.566	-0.64893	0.41455	-0.11719
0.804	-10.024	18.7469	24.1604	0.035351	0.14854	-0.13135	-0.614000000000001	8.268	19.9182	-0.020313	0.04668	0.0043945	47.3155	21.8285	19.8094	0.11475	-0.16064	0.013672	-39.577	129.0217	957.2731	-1.3765	0.59521	-0.35938	-34.978	-154.5415	1460.148	-2.373	1.125	-0.56738	4.098	-0.324999999999999	-7.7054	-0.042969	-0.086914	0.12207	-24.215	121.868	537.3296	-0.59521	0.38623	-0.10645
0.806	13.704	37.643	5.5755	0.02832	0.17705	-0.13799	-1.826	6.7215	44.3444	-0.003125	0.031445	-0.0045899	25.512	-12.12114	19.8103	0.12354	-0.16699	0.021973	12.825	94.685	948.6847	-1.3374	0.59619	-0.33545	-57.3689	-132.756	1498.395	-2.4082	1.166	-0.58203	9.717	22.2674	8.4548	-0.035156	-0.070313	0.10986	-3.452	166.12	490.568	-0.56787	0.36816	-0.097168
0.808	-22.65	24.163	4.70158	0.028027	0.20029	-0.14561	-22.4694	-11.3976	34.37	0.0092773	0.016113	-0.018262	47.494	16.3304	9.019	0.11963	-0.17065	0.02832	-3.51	177.411	900.9073	-1.3025	0.59692	-0.32032	-16.651	-177.898	1554.152	-2.4741	1.2329	-0.60107	19.3953	48.159	4.8348	-0.036377	-0.052002	0.10547	-6.2316	169.305	469.172	-0.521	0.33838	-0.086426
0.81	3.169	6.4179	17.0149	0.02832	0.22803	-0.15576	26.3943	-60.905	56.302	0.021484	0.003418	-0.033691	58.1808	40.807	-23.85759	0.125	-0.17578	0.030762	-11.545	132.971	894.638	-1.2651	0.59717	-0.30713	-3.423	-135.609	1542.711	-2.5117	1.2715	-0.60888	-8.321	-11.6302	16.3575	-0.035645	-0.039551	0.099121	8.9175	111.2109	453.509	-0.48803	0.31372	-0.081055
0.812	3.516	29.2093	12.562	0.02207	0.25029	-0.16133	10.611	-14.077	65.7044	0.031348	-0.010449	-0.046387	28.6178	7.505	4.009	0.11768	-0.17236	0.037109	11.566	159.196	878.684	-1.2207	0.58887	-0.28613	-12.7279	-107.4	1497.889	-2.5483	1.3052	-0.60498	-5.454	26.3286	31.186	-0.031738	-0.024414	0.088379	34.5123	176.107	423.7528	-0.45361	0.29346	-0.074219
0.814	-26.247	-3.432	36.888	0.018359	0.26924	-0.16533	-11.9973	-24.672	93.43	0.043164	-0.021582	-0.064453	33.146	32.736	13.99034	0.11523	-0.1709	0.040039	4.451	205.708	850.623	-1.1929	0.59424	-0.27832	53.367	-135.124	1540.621	-2.5898	1.3457	-0.61182	-24.63	14.637	23.6539	-0.03418	-0.015625	0.084961	7.678	138.124	405.7013	-0.4165	0.2666	-0.063965
0.816	37.2292	-16.6573	54.4886	0.009375	0.28994	-0.17236	24.516	-57.7748	110.7727	0.048633	-0.034473	-0.085937	20.561	15.8154	-9.8795	0.11865	-0.17383	0.046875	43.17	155.853	849.965	-1.1445	0.5835	-0.25439	53.32361	-57.7629	1548.651	-2.6011	1.3599	-0.6123	-36.681	19.0259	17.4205	-0.030273	-0.00097656	0.077637	-5.806	139.8748	390.3343	-0.39795	0.25781	-0.062988
0.818	10.365	-25.032	54.0818	-0.0014648	0.30918	-0.17256	35.393	-39.772	102.613	0.055469	-0.046289	-0.11123	17.386	6.587868	0.465000000000001	0.11303	-0.17041	0.053955	57.543	211.362	792.273	-1.1084	0.57373	-0.24097	49.867	-53.35	1548.709	-2.6211	1.3828	-0.61719	-20.885	67.006	12.2496	-0.026367	0.0065918	0.068848	-12.139	205.477	379.414	-0.36719	0.24072	-0.051758
0.82	2.265	-40.933	69.9091	-0.015625	0.32715	-0.16895	37.6576	-75.5031	137.312	0.059082	-0.060059	-0.14014	26.611	50.422	1.005873	0.11279	-0.16602	0.060059	5.754	194.705	752.36949	-1.064	0.56689	-0.2251	63.599	-66.7822	1576.172	-2.6238	1.3929	-0.61523	-47.7721	29.7053	4.6944	-0.023438	0.012695	0.063477	-56.282	139.8247	353.975	-0.34473	0.22485	-0.04541
0.822	22.934	-22.088	93.8832	-0.038965	0.34268	-0.16767	48.0993	-62.6428	216.703	0.055371	-0.060351	-0.16191	4.836	21.1689	16.562	0.10791	-0.1626	0.0625	-14.092	164.224	710.9721	-1.0161	0.55713	-0.21338	5.516	1.273	1535.391	-2.6211	1.3984	-0.61133	-52.5869	28.4797	2.7279	-0.021484	0.015137	0.047363	-37.4473	177.474	317.5572	-0.32471	0.21826	-0.040039
0.824	-6.966	-22.223	111.4996	-0.063965	0.35791	-0.16611	15.839	-2.29	283.236	0.042968	-0.057715	-0.19052	-20.059	31.7928	16.9643	0.10254	-0.16113	0.065918	-33.7452	238.038	666.354314	-0.9917	0.54834	-0.20605	15.206	-44.2279	1528.7513	-2.6011	1.4028	-0.604	-21.3307	34.3849	-6.744	-0.015137	0.01123	0.044434	-53.196	148.243	288.152	-0.2998	0.20508	-0.026855
0.826	17.145	-60.156	179.99722	-0.09248	0.37549	-0.16299	14.031	14.767	372.541	0.016406	-0.05459	-0.20108	-26.0104	49.904	-10.0402	0.10449	-0.15918	0.069336	-23.9445	168.9913	663.3315	-0.93506	0.53174	-0.19287	54.9879	13.88873	1494.563	-2.5879	1.4004	-0.59814	-20.26	-5.87163	9.8281	-0.0029297	0.015137	0.035645	-49.3596	80.61	257.917	-0.28955	0.19873	-0.023438
0.828	-9.505	-69.891	211.899	-0.12539	0.39444	-0.158	16.418	118.956	491.057	-0.017285	-0.04248	-0.21143	-35.049	9.185	-2.0556	0.1001	-0.15527	0.077149	7.594	168.805	648.6069	-0.89209	0.51416	-0.18311	20.748	57.835	1457.344	-2.5659	1.3911	-0.58545	-34.243	27.741	30.67	0.0024414	0.01709	0.023682	-50.7926	127.218	229.667	-0.27881	0.19189	-0.0087891
0.83	-43.382	-94.431	316.156	-0.16406	0.41602	-0.15723	-14.458	126.198	601.553	-0.068359	-0.027832	-0.2207	-27.202	29.5406	14.2474	0.10107	-0.15381	0.078125	-6.34	180.67	600.1992	-0.85205	0.49951	-0.17529	37.601	15.93	1497.795	-2.5445	1.3823	-0.57373	-36.336	16.0563	30.059	0.01123	0.0097656	0.011719	-41.68237	85.9536	215.4723	-0.26489	0.17846	-0.0043945
0.832	-30.3824	-54.68944	465.3368	-0.20196	0.43955	-0.15244	-12.992	98.6674	712.425	-0.13242	-0.012891	-0.21758	-40.1048	11.178	14.7256	0.10254	-0.15527	0.075195	12.959	114.949	568.1764	-0.79053	0.47314	-0.1626	10.22	76.252	1482.83842	-2.5234	1.3711	-0.56445	-13.146	3.8223	44.282	0.029297	0.003418	-0.0058594	-26.608	92.577	209.114	-0.25684	0.18066	0.012695
0.834	-117.237	-10.881	528.372	-0.24043	0.46446	-0.14824	-48.3391	122.252	736.2716	-0.20576	0.0029296	-0.22256	-44.718	-4.3044	21.8514	0.10059	-0.1582	0.070313	-5.801	179.913	534.5533	-0.75781	0.45898	-0.15771	-35.904	19.55937	1491.9231	-2.4863	1.3428	-0.54883	-3.521	41.125	26.197	0.038086	-0.0043945	-0.01123	-34.77608	138.43	204.2046	-0.24707	0.17578	0.020996
0.836	-110.696	-17.751	608.138	-0.28457	0.49141	-0.15371	-59.62	60.388	799.936	-0.28467	0.020508	-0.23115	-34.6965	36.2723	2.60425	0.098633	-0.15527	0.070313	-13.151	171.142	532.8134	-0.69678	0.43506	-0.15088	11.475	-19.46075	1526.644	-2.4712	1.3286	-0.53857	-11.287	-11.59452	45.71954	0.054688	-0.012695	-0.028809	-30.16639	86.105	202.0804	-0.2373	0.17139	0.033203
0.838	-103.97	-14.8652	664.965	-0.33106	0.51738	-0.15498	-28.772	31.236	869.922	-0.38027	0.043457	-0.25137	-63.4296	9.8047	9.0907	0.09375	-0.15747	0.064942	38.3919	141.261	520.9778	-0.65039	0.41602	-0.14478	-16.113	17.65988	1518.508	-2.437	1.2974	-0.52197	-0.183	-20.8216	66.4497	0.063964	-0.026367	-0.045166	-29.259	143.401	200.239	-0.22461	0.16602	0.04248
0.84	-146.435	-15.301	740.078	-0.38477	0.53516	-0.1626	-31.43	2.039	881.133	-0.48633	0.068848	-0.26611	-44.713	29.9593	44.239	0.087402	-0.15869	0.062012	0.564	190.609	477.5404	-0.61035	0.39648	-0.13818	-12.35	-54.116	1522.9643	-2.4167	1.2776	-0.51294	6.257	-2.437	53.0811	0.071777	-0.039551	-0.060059	-23.6701	135.752	167.683	-0.20923	0.16089	0.05127
0.842	-42.035	-48.079	837.346	-0.44326	0.55772	-0.18076	-24.3584	-89.502	837.112	-0.60156	0.11269	-0.26836	-34.3967	50.114	10.3607	0.07666	-0.15527	0.061523	-9.6759	126.301	462.47	-0.54932	0.36816	-0.13232	-17.073	-2.97377	1501.465	-2.3906	1.2617	-0.5	-6.619	-40.3783	54.9732	0.07666	-0.053223	-0.09375	-5.752	90.223	166.848	-0.18848	0.1582	0.055176
0.844	-36.698	5.33	831.892	-0.5123	0.57363	-0.18721	-28.1605	-115.484	751.121	-0.74102	0.16299	-0.25547	-48.9755	12.0958	4.0636	0.064453	-0.15186	0.063477	-12.616	141.06983	428.92	-0.53125	0.35742	-0.12354	-86.855	19.6501	1464.0781	-2.3633	1.2246	-0.48047	22.331	-14.335	78.176	0.080078	-0.05957	-0.11133	-36.3983	107.589	139.999	-0.16357	0.14551	0.060059
0.846	-78.2271	-9.037	829.444	-0.59355	0.59121	-0.2083	-53.396	-139.736	729.045	-0.89883	0.2333	-0.21875	-10.578	55.8361	3.1146	0.046387	-0.14355	0.060547	-64.843	166.382	414.633	-0.48633	0.33203	-0.11279	-60.534	-36.862	1481.3512	-2.3418	1.209	-0.47168	23.943	-60.7492	92.0955	0.078125	-0.061523	-0.13574	-36.5672	47.661	103.414	-0.14502	0.13965	0.0625
0.848	1.028	-36.3987	821.929	-0.68896	0.60889	-0.21709	-43.646	-137.363	763.84	-1.072	0.30459	-0.1669	-11.989	34.7941	3.425	0.029785	-0.12939	0.060547	-46.3773	121.7693	393.9388	-0.45703	0.31763	-0.1062	-71.885	38.9174	1467.5283	-2.3145	1.1709	-0.45508	27.863	-94.906	132.8428	0.069336	-0.066162	-0.16186	-26.198	26.074	94.5227	-0.10889	0.12451	0.069824
0.85	-7.936	-31.805	814.413	-0.80469	0.61914	-0.21826	-48.868	-40.9338	780.5775	-1.2568	0.38184	-0.088867	-8.978	11.7339	28.679	0.010254	-0.11426	0.059082	-29.628	157.323	317.749	-0.43359	0.30371	-0.097168	-74.604	15.457	1444.7931	-2.2886	1.1416	-0.4353	53.7326	-57.747	140.0205	0.051758	-0.069824	-0.17676	-11.533	73.711	81.8708	-0.085205	0.11255	0.06958
0.852	10.189	-42.77	853.6463	-0.95488	0.62637	-0.22109	-30.131	-38.3972	776.4311	-1.4818	0.46308	-0.035547	25.387	43.28	7.9699	-0.011719	-0.097656	0.062988	-55.4097	111.288	302.4978	-0.40088	0.28613	-0.086914	-28.577	34.111	1430.466	-2.2593	1.1138	-0.42529	17.2112	-79.9908	182.995	0.019043	-0.069336	-0.1958	11.197	39.32791	82.0002	-0.062012	0.096191	0.071777
0.854	61.291	-21.336	866.8705	-1.1315	0.63721	-0.21153	-35.533	-59.4193	802.553	-1.7528	0.55606	-0.028906	22.951	13.0401	10.5653	-0.023438	-0.087402	0.067383	-35.2799	82.621	281.1809	-0.39014	0.28174	-0.075195	-72.697	128.947	1387.332	-2.2207	1.0801	-0.40625	31.914	-33.139	274.049	1.3531e-13	-0.064453	-0.20654	39.856	85.782	78.3711	-0.032715	0.075195	0.073242
0.856	9.226	-36.81	832.5885	-1.328	0.64385	-0.20605	-116.674	-47.8714	811.258	-2.0101	0.67285	-0.050391	28.645	28.961	30.899	-0.047852	-0.064941	0.064941	-35.8562	144.944	244.8846	-0.36572	0.26514	-0.057129	-95.447	92.56101	1362.3725	-2.1968	1.0591	-0.396	26.215	35.395	360.19	-0.058105	-0.062988	-0.22607	17.966	70.373	44.2097	-0.01709	0.061035	0.073242
0.858	-12.97	-117.122	868.55	-1.5272	0.65771	-0.1876	-81.94	-82.24	872.712	-2.2108	0.79346	-0.08994	37.4816	44.475	27.3908	-0.061035	-0.046631	0.065674	-22.1763	112.048	257.4947	-0.35205	0.2561	-0.046875	-22.395	156.08	1336.9733	-2.144	1.0151	-0.38525	17.691	31.9647	452.242	-0.11084	-0.06128	-0.24975	6.072	20.5588	51.71559	0.0058594	0.041504	0.070313
0.86	-30.06087	-114.601	888.351	-1.7183	0.6626	-0.1748	-2.954	-38.07	939.372	-2.332	0.92383	-0.14209	33.906	-3.2138	35.611	-0.074219	-0.026855	0.069336	6.226	148.352	239.8972	-0.34033	0.24512	-0.035645	-37.8143	151.398	1291.964	-2.1	0.98584	-0.37867	41.805	63.07	522.668	-0.16895	-0.057617	-0.2793	19.368	50.359	39.646	0.020508	0.024903	0.070556
0.862	-32.65711	-140.478	957.6914	-1.8949	0.67383	-0.17383	-2.519	-19.92	956.522	-2.3224	1.0386	-0.17276	25.843	14.3753	29.4221	-0.084961	-0.0073242	0.072266	-50.9795	154.592	219.5553	-0.32764	0.2373	-0.022949	-10.381	92.256	1296.814	-2.062	0.96338	-0.37451	5.152	33.0001	562.528	-0.26563	-0.037598	-0.3208	29.0884	12.7515	35.9885	0.034668	0.0087891	0.071289
0.864	56.6626	-144.018	1010.9308	-2.041	0.69307	-0.17393	61.555	-96.675	964.2239	-2.2203	1.1449	-0.21562	47.32324	1.5574	20.3491	-0.090332	0.0083008	0.07373	-12.772	95.318	206.08743	-0.31885	0.23096	-0.015625	3.491	151.604	1271.8734	-1.999	0.92773	-0.3623	-27.35	-12.108	658.539	-0.31934	-0.021973	-0.3418	34.902	14.3449	38.436	0.050293	-0.010742	0.074219
0.866	48.473	-113.79	977.9175	-2.1346	0.73525	-0.18135	42.433	-107.672	917.111	-2.0464	1.2328	-0.2707	33.778	-20.9737	24.1756	-0.094238	0.027832	0.066895	-7.281	142.046	177.2913	-0.2998	0.2207	0.0014648	-17.281	134.912	1260.868	-1.9702	0.91553	-0.35986	-4.023	1.12	718.377	-0.45557	0.017578	-0.36816	11.648	44.112	0.3588	0.052246	-0.018066	0.072266
0.868	68.0346	-181.309	987.68771	-2.1689	0.78652	-0.18496	30.241	-181.551	901.756	-1.8596	1.3023	-0.32686	52.3893	19.8354	10.8817	-0.092285	0.041015	0.065918	-21.194	126.057	184.9776	-0.28394	0.21069	0.01416	43.5765	153.103	1280.0826	-1.9111	0.88672	-0.35156	-6.793	-28.157	763.066	-0.57544	0.051758	-0.37524	-6.976	0.727399999999999	31.2873	0.063965	-0.040039	0.075684
0.87	86.0268	-201.716	1002.11838	-2.1499	0.84033	-0.19873	75.8924	-247.349	985.778	-1.6885	1.3301	-0.38867	22.245	-2.4814	10.6454	-0.089844	0.052246	0.060547	11.798	88.2681	183.9034	-0.26758	0.19336	0.027344	32.039	182.113	1247.8174	-1.8624	0.86231	-0.34424	-6.286	-29.78	733.665	-0.70117	0.093262	-0.37354	-17.35	43.601	18.976879	0.068359	-0.05249	0.077636
0.872	75.0595	-211.358	1046.606	-2.0907	0.88896	-0.21826	46.291	-231.3	1058.206	-1.5635	1.2865	-0.43106	12.733	13.5251	18.0838	-0.071777	0.065918	0.052734	-27.6691	109.717	140.29223	-0.24316	0.18604	0.04541	41.3812	79.668	1239.0744	-1.812	0.83057	-0.33594	2.0026	-37.918	656.161	-0.87695	0.14502	-0.33594	-9.0026	32.606	14.0613	0.074219	-0.063965	0.082031
0.874	99.665	-282.489	1150.6442	-2.0144	0.93037	-0.25205	15.521	-307.516	1134.575	-1.4829	1.18	-0.45635	25.2694	43.671	17.5575	-0.058105	0.063965	0.049805	-20.606	59.984	118.26401	-0.22412	0.17578	0.05127	51.955389	100.033	1194.098	-1.7324	0.79395	-0.33203	-45.811	-103.803	647.6288	-0.98584	0.17236	-0.31982	15.351	-8.2383	24.5814	0.080566	-0.080078	0.083984
0.876	69.7107	-264.602	1178.021	-1.9312	0.96514	-0.28213	-7.937	-286.534	1180.421	-1.4481	1.0062	-0.45869	-6.036	-6.2382	20.6363	-0.037109	0.063965	0.035156	3.301	69.734	107.394	-0.19092	0.15039	0.067383	33.4798	108.9116	1153.982	-1.6929	0.76416	-0.32227	-40.397	-72.616	658.003	-1.2012	0.23291	-0.26367	-5.538	13.6262	-2.3981	0.07959	-0.081543	0.09082
0.878	-4.147	-298.92	1198.036	-1.8628	0.97881	-0.30703	-20.88	-256.629	1204.174	-1.4387	0.80215	-0.4461	-8.79	23.598	35.169	-0.019287	0.0625	0.026855	0.131	91.175	101.192	-0.16015	0.13623	0.070069	70.9655	95.456	1149.126	-1.6152	0.7207	-0.31934	-42.7362	-40.12063	699.733	-1.4214	0.29932	-0.1958	-10.857	-24.1088	-11.5218	0.083984	-0.098145	0.099609
0.88	-10.0273	-318.464	1247.884	-1.8164	0.97266	-0.32324	-7.236	-253.019	1257.23	-1.4512	0.60156	-0.43359	-5.033	21.259	9.2261	-0.00097656	0.053711	0.02002	29.925	51.7051	108.7387	-0.13184	0.12012	0.08252	52.5919	179.896	1121.884	-1.5654	0.68262	-0.30859	-31.284	-64.045	767.2986	-1.5562	0.34131	-0.1792	-7.926	-25.0655	-4.7186	0.092286	-0.1084	0.10693
0.882	-39.3582	-224.16	1258.923	-1.7913	0.92861	-0.33994	-5.647	-119.8151	1283.068	-1.4889	0.43203	-0.42636	-34.877	-1.82309	14.5716	0.024414	0.038086	-0.00097656	16.6	85.486	67.7276	-0.092773	0.095703	0.090332	25.641	155.455	1086.2081	-1.5176	0.64648	-0.29492	-44.7752	-47.97	780.2	-1.853	0.44775	-0.18555	-19.028	20.4108	-28.2058	0.097656	-0.11719	0.11377
0.884	-17.9694	-172.88347	1329.328	-1.7758	0.86289	-0.3541	28.014	-69.922	1312.859	-1.5495	0.31523	-0.41553	-33.9367	49.177	-7.72072	0.03418	0.027344	-0.0097656	13.579	60.323	57.0042	-0.080566	0.084961	0.087891	62.147	142.9236	1048.251	-1.4453	0.60059	-0.28174	-107.264	-116.297	787.788	-2.0488	0.55761	-0.20288	-27.819	-7.026	-1.0775	0.1084	-0.12988	0.1167
0.886	12.699	-122.195	1368.832	-1.7649	0.78242	-0.3666	56.117	-60.911	1353.1069	-1.6292	0.25586	-0.40381	-55.9812	13.36192	-10.09641	0.054688	0.0087891	-0.019043	20.282	40.678	62.025	-0.04541	0.058105	0.096191	40.012	199.705	1037.349	-1.4097	0.57275	-0.27881	-43.9732	-131.571	836.866	-2.209	0.67676	-0.22803	7.066	38.679	5.2815	0.11475	-0.13623	0.1167
0.888	-63.297	-72.621	1345.64	-1.7604	0.71279	-0.3708	45.0573	-4.32600000000001	1340.551	-1.7434	0.25098	-0.40147	-50.853	0.154199999999999	7.2267	0.065918	-0.0048828	-0.033447	5.481	86.868	36.9498	-0.019775	0.037598	0.096924	32.818	175.399	1022.101	-1.3413	0.52979	-0.26318	5.732	-77.495	883.1846	-2.3472	0.85205	-0.28271	-32.53277	47.187	11.5387	0.12598	-0.14746	0.12061
0.89	-40.3542	-119.2714	1376.8705	-1.77	0.65088	-0.37646	71.81	-71.009	1362.9108	-1.8667	0.31006	-0.40381	-42.319	24.1193	-0.76917	0.076172	-0.021973	-0.043945	19.899	44.645	46.7275	0.00097656	0.014648	0.10156	48.841	238.804	1003.409	-1.2861	0.49463	-0.25415	-4.772	-87.06	939.221	-2.3613	0.94141	-0.30273	-38.6013	22.6269	21.5096	0.13257	-0.15796	0.11572
0.892	-15.537	-61.405	1397.801	-1.8064	0.62451	-0.37959	90.28227	-68.552	1381.0605	-1.9898	0.42031	-0.41152	-51.90966	-23.7585	9.0741	0.086914	-0.038086	-0.057617	32.479	63.35	38.9388	0.016113	-0.0068359	0.10596	6.344	244.077	943.676	-1.2324	0.46094	-0.24902	43.488	-84.33	971.9584	-2.3062	1.1011	-0.34033	-17.407	54.47	15.4168	0.13623	-0.16455	0.11035
0.894	-30.631	-32.748	1430.1502	-1.877	0.6124	-0.38838	51.268	-27.716	1381.38	-2.1067	0.55274	-0.42383	-23.688	19.9741	24.905	0.093262	-0.041016	-0.064453	-29.431	72.702	21.2398	0.026855	-0.016602	0.10938	-6.345	172.098	897.9111	-1.1597	0.42236	-0.24219	16.732	-134.488	930.9565	-2.207	1.1924	-0.38183	-33.375	10.5672	8.4348	0.14209	-0.17432	0.10449
0.896	-1.2	-87.005	1506.143	-1.9594	0.62842	-0.39736	-3.73099999999999	-69.395	1408.04	-2.2032	0.69063	-0.43359	-28.95	19.57305	9.799	0.10059	-0.051758	-0.078125	-26.2241	24.4675	41.554	0.040527	-0.041504	0.1167	-18.503	212.384	838.334	-1.1054	0.39599	-0.23486	-2.759	-239.412	969.597	-2.0918	1.2637	-0.43018	-33.73	-0.8722	-4.0638	0.1416	-0.18066	0.10498
0.898	-54.6233	-48.732	1471.676	-2.0608	0.65644	-0.41504	-38.461	-19.235	1399.398	-2.2762	0.81357	-0.44072	-53.0557	-10.227	16.4955	0.10132	-0.056153	-0.084229	-10.084	47.169	24.5399	0.042725	-0.055176	0.12085	-39.272	176.392	818.102	-1.0547	0.37646	-0.23633	45.2628	-243.743	1035.624	-1.9292	1.3052	-0.46436	-0.514999999999997	37.7514	-18.2182	0.14209	-0.18945	0.097656
0.9	-82.8	-99.413	1456.6	-2.1577	0.69189	-0.43018	-28.01	-49.724	1424.82	-2.3374	0.91846	-0.4502	-13.539	38.7338	-0.9621	0.10693	-0.057129	-0.096191	-27.112	14.0955	19.6741	0.047363	-0.074219	0.13281	4.098	190.459	823.1975	-0.99023	0.35254	-0.22363	20.801	-252.723	1097.3755	-1.8574	1.2871	-0.49219	10.342	-5.10427	-18.3884	0.13745	-0.19043	0.09082
0.902	-68.397	-127.88	1503.3023	-2.2482	0.73731	-0.44863	-1.401	-119.538	1505.92	-2.3887	1.0016	-0.4666	-15.251	14.97	-1.13	0.10791	-0.058105	-0.10352	10.657	-1.0599	16.2908	0.045898	-0.089355	0.13721	-29.113	239.826	782.54	-0.95166	0.34424	-0.21924	12.571	-256.469	1175.461	-1.7656	1.1777	-0.51563	11.758	34.005	4.507	0.13623	-0.19287	0.083984
0.904	-90.036	-73.956	1527.0599	-2.3343	0.78565	-0.46396	-2.67	-56.145	1540.372	-2.4273	1.0712	-0.48662	-12.777	26.4885	7.207	0.1123	-0.057129	-0.10547	-24.85	23.14635	-10.5136	0.050293	-0.093262	0.14648	-21.141	164.8367	767.216	-0.89648	0.31543	-0.20703	-25.258	-225.744	1170.698	-1.7185	1.0354	-0.52905	21.8659	51.888	12.7037	0.12646	-0.19482	0.080078
0.906	-46.7462	-132.8063	1595.348	-2.4104	0.8376	-0.47568	13.189	-100.935	1563.615	-2.4632	1.1165	-0.51084	34.9061	48.609	16.1057	0.11035	-0.056641	-0.12549	-19.597	-17.5423	0.0154000000000005	0.046387	-0.10059	0.16016	-32.254	177.3819	729.416	-0.84863	0.29492	-0.20044	-70.045	-250.584	1205.361	-1.6953	0.87109	-0.52832	5.874	21.483	24.5831	0.11914	-0.19238	0.075195
0.908	-38.75154	-113.096	1585.367	-2.4847	0.90088	-0.4794	10.498	-75.516	1572.128	-2.4807	1.1342	-0.53262	7.59	-12.54179	29.3239	0.11011	-0.055908	-0.13501	-14.639	2.7578	19.4728	0.046142	-0.10718	0.16919	-55.613	155.084	708.337	-0.80566	0.27441	-0.19189	-6.261	-199.992	1283.414	-1.6919	0.6626	-0.51514	19.489	54.22	18.7964	0.11572	-0.18555	0.072266
0.91	-72.298	-99.8183	1537.447	-2.5469	0.96289	-0.48242	21.477	-17.147	1545.083	-2.478	1.1284	-0.55908	5.517	-4.726	65.77964	0.11084	-0.059082	-0.15088	-36.9266	19.0739	10.9038	0.048828	-0.10791	0.17822	11.689	110.9724	696.787	-0.74609	0.24219	-0.1748	13.876	-109.138	1322.1541	-1.7046	0.57275	-0.50146	7.463	15.238	10.58154	0.10816	-0.17579	0.07251
0.912	-18.3343	-145.144	1578.067	-2.6043	1.0311	-0.48418	55.724	-71.46	1564.022	-2.4645	1.0984	-0.57344	27.6304	-15.701	35.93	0.10156	-0.058594	-0.17285	21.002	0.279	40.5896	0.057617	-0.11426	0.18652	2.869	168.568	631.7261	-0.7207	0.22363	-0.16895	-2.375	-102.42	1388.598	-1.7656	0.44922	-0.48633	4.81	4.6197	25.00717	0.10303	-0.1665	0.070801
0.914	2.8257	-44.778	1574.479	-2.6402	1.0945	-0.48506	71.0125	-5.678	1544.343636	-2.4448	1.0521	-0.58662	20.574	-37.574	75.8998	0.091309	-0.05957	-0.18311	-6.618	36.445	27.463	0.063477	-0.11279	0.19482	-24.564	146.558	613.644	-0.67041	0.20068	-0.15576	25.777	-45.648	1389.705	-1.8432	0.4004	-0.47412	20.016	36.826	16.9325	0.10107	-0.15332	0.07373
0.916	6.2472	-22.49	1560.2268	-2.6605	1.1578	-0.4874	48.3975	1.852	1520.923	-2.4124	0.99853	-0.60107	29.908	9.749	100.5218	0.069824	-0.056641	-0.20703	-42.982	22.3456	24.2546	0.081543	-0.12207	0.19775	22.843	153.6796	571.64	-0.63233	0.17749	-0.14942	3.6215	-44.504	1351.871	-1.9194	0.39795	-0.46436	24.9285	-3.6312	18.9724	0.095703	-0.14453	0.07373
0.918	46.8627	-22.235	1553.67	-2.6787	1.2075	-0.48262	4.61	-30.6334	1531.229	-2.387	0.94697	-0.61103	45.947	-12.549	121.209	0.038086	-0.047119	-0.22387	-4.525	7.2759	35.672	0.097168	-0.12085	0.19409	17.006	193.646	515.314	-0.59326	0.1543	-0.14453	44.6362	-75.838	1397.539	-2.0347	0.46533	-0.45654	20.683	34.62	23.246	0.091309	-0.13184	0.075195
0.92	-11.3948	39.31	1508.616	-2.6934	1.2422	-0.4707	-27.868	64.436	1508.6266	-2.3672	0.9043	-0.6123	64.666	-4.608	169.687	-0.003418	-0.037109	-0.23877	-26.243	41.59	10.16549	0.1167	-0.11865	0.19629	25.827	140.4702	510.303	-0.53955	0.13477	-0.12891	77.6118	-38.454	1394.6308	-2.0874	0.51611	-0.45459	-15.3265	39.412	4.6069	0.093506	-0.1189	0.072998
0.922	-14.7697	-18.637	1521.5602	-2.7079	1.2728	-0.4627	-12.996	56.881	1499.3964	-2.35	0.86602	-0.61406	51.193	9.525	196.1059	-0.083008	-0.02002	-0.25635	-14.187	4.079	18.3734	0.13525	-0.12988	0.19043	61.819	171.21819	446.1384	-0.51123	0.12842	-0.12109	14.06	-77.388	1405.35	-2.1733	0.64893	-0.46826	13.968	12.1329	16.9462	0.096191	-0.1084	0.071777
0.924	22.635	7.109	1524.1672	-2.7261	1.2977	-0.44795	18.525	71.5796	1512.5115	-2.3461	0.83672	-0.61445	31.943	-10.5791	270.357	-0.15845	-0.00024415	-0.26538	7.812	5.5907	16.5304	0.14697	-0.1333	0.18799	16.959	167.523	425.4314	-0.46631	0.099609	-0.11719	13.058	-80.944	1451.8081	-2.2211	0.74756	-0.4834	11.663	61.557	18.6192	0.10254	-0.099609	0.070313
0.926	11.588	47.0977	1500.564	-2.7433	1.3118	-0.43545	19.703	113.078	1467.3346	-2.3383	0.8164	-0.6207	49.695	30.8515	367.763	-0.24561	0.020508	-0.2666	-25.872	18.1925	-18.6036	0.16406	-0.14551	0.17822	52.8841	138.282	404.7567	-0.42529	0.081787	-0.11181	-49.3013	-62.388	1434.3039	-2.2651	0.83643	-0.50342	12.357	27.297	7.775	0.10742	-0.09082	0.07373
0.928	24.9235	-13.5015	1528.53769	-2.7506	1.3127	-0.42031	-3.59	26.195	1464.956	-2.3252	0.80664	-0.61953	12.097	65.8468	464.6012	-0.375	0.046875	-0.26855	19.694	-3.68023	-5.9132	0.177	-0.15015	0.16602	50.0963	177.2059	351.93905	-0.38086	0.060547	-0.11035	-65.5927	-126.931	1481.286	-2.3179	0.94189	-0.53711	13.143	7.2542	24.5921	0.12354	-0.078613	0.063965
0.93	-21.2007	56.1202	1486.1027	-2.7495	1.3091	-0.39941	1.535	76.548	1471.922	-2.3081	0.81201	-0.61084	-5.182	62.7029	554.03	-0.44727	0.061523	-0.27002	30.745	38.794	-5.15996	0.18408	-0.16162	0.15869	41.6834	136.1061	336.374	-0.32568	0.038086	-0.10352	25.038	-103.157	1525.5053	-2.3506	0.98438	-0.55664	-24.748	32.227	-2.0443	0.13598	-0.073731	0.058594
0.932	-30.105	37.4715	1451.5498	-2.7321	1.2993	-0.38389	37.422	102.849	1462.6466	-2.2834	0.81133	-0.61035	2.415	81.997	632.9555	-0.59082	0.088379	-0.27637	9.8	25.0019	8.4696	0.19385	-0.16895	0.14307	83.1932	116.982	308.124	-0.30078	0.028809	-0.089844	7.26	-104.007	1531.413	-2.416	1.0527	-0.59033	-22.794	-18.9582	8.4826	0.15186	-0.07373	0.058105
0.934	-1.7	3.192	1469.922	-2.7164	1.2871	-0.36562	60.435	57.337	1489.1238	-2.2645	0.81504	-0.60527	-42.8568	37.373	678.2924	-0.70947	0.11035	-0.27979	40.425	0.3764	33.4396	0.1958	-0.1709	0.13623	55.378	158.779	267.265	-0.25537	0.0073242	-0.085938	19.6	-138.406	1554.765	-2.4675	1.0862	-0.62231	-13.715	27.2606	26.959	0.1665	-0.071289	0.038574
0.936	-2.248	58.172	1466.247	-2.6914	1.2683	-0.34454	80.324	104.716	1452.8669	-2.2473	0.81504	-0.59707	-45.61205	6.837	789.2349	-0.83545	0.13232	-0.28467	0.73	23.6892	5.9479	0.19971	-0.18213	0.12402	44.877	123.812	265.968	-0.22608	-0.010498	-0.085206	33.826	-80.757	1527.279	-2.5093	1.1079	-0.64795	-13.317	31.3019	13.8309	0.17773	-0.068359	0.03418
0.938	-7.239	-25.74638	1492.173	-2.6683	1.2499	-0.3292	48.401	13.602	1436.7514	-2.2308	0.81533	-0.58643	-19.594	7.461	855.298	-1.0137	0.18555	-0.28174	2.171	-5.5623	15.5123	0.19678	-0.18799	0.11035	53.3154	172.086	245.6077	-0.19385	-0.028809	-0.08252	3.025	-92.5632	1514.706	-2.5366	1.1128	-0.67236	-34.835	0.7286	29.4311	0.19238	-0.064941	0.026855
0.94	-17.8785	4.8719	1474.885	-2.644	1.2271	-0.3208	56.774	2.7655	1444.842	-2.2217	0.80469	-0.57813	-35.843	-44.177	893.021	-1.1108	0.21973	-0.27588	33.193	9.8943	20.2633	0.19482	-0.1875	0.10498	30.862	140.304	240.5083	-0.14844	-0.047852	-0.073242	64.1262	-75.895	1573.966	-2.543	1.1055	-0.68555	-16.878	42.782	29.779	0.19873	-0.063477	0.014648
0.942	-76.487	43.737	1413.5242	-2.6103	1.205	-0.31123	39.052	74.08	1425.975	-2.2141	0.79063	-0.56641	-12.367	-58.434	900.156	-1.3101	0.30615	-0.24121	-4.124	34.548	10.1543	0.19189	-0.17822	0.10059	53.777	91.2364	237.364	-0.12842	-0.0625	-0.07373	83.335	1.577	1561.401	-2.5327	1.0767	-0.70215	-29.6884	8.7799	6.334475	0.20215	-0.058105	0.010742
0.944	-38.106	0.875999999999998	1421.7549	-2.5764	1.1837	-0.29785	25.4647	31.001	1429.817	-2.2	0.77227	-0.55157	-45.509	-106.285	870.475	-1.5	0.38965	-0.21704	7.161	3.333	25.343785	0.1875	-0.17358	0.089111	28.916	116.5318	190.444	-0.098633	-0.08252	-0.070313	14.634	-24.607	1551.207	-2.5008	1.0569	-0.71557	-35.8346	3.9022	17.6268	0.20117	-0.052734	0.0063477
0.946	-20.298	91.234	1412.842	-2.5378	1.1489	-0.29043	44.5175	75.785	1403.743	-2.1844	0.75352	-0.54453	-104.944	-180.09	871.9657	-1.7129	0.49023	-0.19873	-5.378	30.729	-10.8069	0.18066	-0.15967	0.084473	-2.874	97.5906	186.374	-0.07959	-0.098634	-0.065673	25.954	26.9366	1526.202	-2.4565	1.0396	-0.72705	1.983	15.0424	20.8455	0.19922	-0.044678	0.0019531
0.948	-54.6393	78.6353	1369.0998	-2.4979	1.113	-0.27558	16.518	66.825	1317.817	-2.1659	0.73799	-0.53261	-54.6997	-138.564	901.8847	-2.0425	0.66504	-0.20557	-24.346	15.44655	-5.8333	0.17334	-0.13623	0.069336	-10.621	101.1938	174.0388	-0.064941	-0.11816	-0.060547	-16.648	68.891	1477.847	-2.3804	1.0005	-0.74219	-16.459	-36.961	5.5862	0.19336	-0.038086	-0.0019531
0.95	-35.8851	52.305	1353.175	-2.4585	1.0747	-0.26465	0.252000000000002	18.366	1284.799	-2.1445	0.7207	-0.52002	-57.3665	-118.459	932.8803	-2.1855	0.75	-0.20361	17.111	-0.78275	9.9208	0.17383	-0.12207	0.066895	-42.349	125.85	140.7758	-0.041992	-0.13477	-0.0625	-10.496	38.0606	1503.5266	-2.3354	0.98682	-0.74561	0.412999999999997	0.876000000000001	-1.177	0.18213	-0.025391	-0.0019531
0.952	-82.372	117.786	1313.883	-2.4266	1.0342	-0.24941	-10.242	112.91573	1249.655	-2.1121	0.70898	-0.51182	-74.663	-123.322	980.445	-2.4063	0.92969	-0.20703	-0.373999999999999	36.865	4.0666	0.17578	-0.09375	0.056641	-33.849	88.915	141.6766	-0.03418	-0.14697	-0.049316	41.258	86.59	1498.9691	-2.2495	0.94385	-0.74951	-3.439	13.6487	-10.49	0.17627	-0.015137	-0.0043945
0.954	-96.229	75.5231	1302.678	-2.3944	0.9962	-0.23506	-16.47	105.979	1244.2871	-2.08	0.69209	-0.50361	-81.137	-128.99	986.422	-2.4832	1.0534	-0.21484	-1.416	12.9263	12.53878	0.17896	-0.07251	0.049316	-19.336	113.084	114.84183	-0.021484	-0.1665	-0.048828	-5.654	43.7919	1468.086	-2.2029	0.90796	-0.74732	-8.91	7.0979	11.3596	0.15674	0.0024414	-0.0019531
0.956	-40.7706	125.636	1289.375	-2.348	0.96767	-0.22139	16.976	126.699	1246.6273	-2.0456	0.68974	-0.49424	-135.156	-203.096	989.698	-2.4824	1.168	-0.22266	-4.916	27.018	-12.657	0.1792	-0.055176	0.039551	-48.08309	106.334	115.514	-0.012207	-0.17725	-0.048584	10.743	3.919	1506.426	-2.1582	0.86816	-0.74512	0.625	50.291	19.4207	0.14306	0.018066	-0.0036621
0.958	-36.8431	155.915	1227.419	-2.3028	0.93994	-0.21777	26.0674	179.864	1193.54124	-2.0093	0.67822	-0.48252	-76.93	-190.927	1037.253	-2.3633	1.2988	-0.25879	-34.4337	47.329	-18.4838	0.18652	-0.026855	0.022949	-35.526	79.967	112.5495	-0.0073242	-0.18604	-0.043457	0.396000000000001	49.251	1464.807	-2.1147	0.81494	-0.73975	5.649	19.0416	19.6274888	0.12695	0.035156	-0.0019531
0.96	-10.588	82.72	1194.09	-2.252	0.91797	-0.21387	23.03	112.562	1178.2046	-1.9707	0.66992	-0.4707	-46.8871	-149.165	1071.2002	-2.2676	1.3457	-0.27246	-16.745	16.5369	7.6126	0.18848	-0.016113	0.018555	-38.615	114.078	69.1115	-0.0014648	-0.19336	-0.041016	14.84	24.386	1469.027	-2.1055	0.78809	-0.73242	8.391	18.0417	7.7063	0.10498	0.060547	0.00048828
0.962	-26.911	147.914	1163.049	-2.185	0.90176	-0.21416	40.171	182.03	1163.353	-1.9309	0.66367	-0.45567	-35.62965	-131.061	1116.613	-2.0605	1.4033	-0.31348	-27.646	59.242	12.4963	0.18604	-0.0014648	0.0078125	-51.1325	98.948	64.728	5.5511e-14	-0.20313	-0.032715	95.4637	74.16	1477.5491	-2.0898	0.74023	-0.71777	15.261	28.4301	-0.5536	0.097656	0.070801	0.0043945
0.964	-47.3604	137.231	1153.6282	-2.1179	0.8835	-0.21631	39.45	198.317	1126.1147	-1.891	0.65371	-0.4418	-5.956	-104.878	1095.1805	-1.9173	1.3797	-0.35864	-20.666	37.97	17.6175	0.18506	0.017334	-0.0039062	-15.997	92.959	69.712	0.0058594	-0.21094	-0.025879	70.557	94.445	1430.418	-2.0867	0.71314	-0.70728	13.188	-17.7646	8.65675	0.075684	0.10059	0.0083008
0.966	8.606	125.9765	1179.2805	-2.0472	0.86123	-0.21397	8.364	144.7642	1106.4716	-1.8485	0.64785	-0.42891	-15.7982	-131.867	1050.362	-1.8003	1.3013	-0.40283	-1.26	17.5021	34.235	0.18506	0.032227	-0.01123	-30.592	112.798	71.2459	0.01123	-0.21265	-0.023926	46.514	26.865	1451.7027	-2.084	0.69434	-0.69434	7.396	11.1243	15.8116	0.054931	0.12207	0.0053711
0.968	13.289	184.037	1157.8722	-1.9825	0.83584	-0.21084	-9.586	181.47	1079.069	-1.8014	0.64258	-0.4168	6.799	-178.0301	1095.452	-1.6973	1.0967	-0.44043	-37.6934	44.721	17.3672	0.17773	0.04834	-0.01709	-14.414	57.058	77.292	0.012695	-0.21533	-0.022461	68.762	44.917	1420.25	-2.0781	0.67578	-0.67383	15.555	24.203	-5.93999	0.035156	0.14258	0.0063477
0.97	13	92.5234	1154.052	-1.9199	0.79883	-0.20703	-43.942	90.202	1041.86	-1.7559	0.63281	-0.40137	20.6607	-170.3985	1165.769	-1.6675	0.96729	-0.44775	-33.42701	-5.5233	10.2294	0.17236	0.059082	-0.029785	-11.59	88.045	62.984	0.018555	-0.21631	-0.012695	17.327	36.20172	1399.095	-2.0742	0.66992	-0.66797	18.45	-8.16	16.9735	0.0078125	0.17627	0.0024414
0.972	13.163	101.116	1099.373	-1.8619	0.76895	-0.19892	-22.547	69.252	1053.22	-1.7095	0.62725	-0.38389	-8.7889	-208.562	1217.267	-1.644	0.70947	-0.44873	14.526	9.4091	13.5489	0.16406	0.07373	-0.029785	-46.23256	76.619	59.468	0.020996	-0.2168	-0.010254	61.7023	35.042	1434.037	-2.0605	0.66797	-0.64746	35.8281	2.005	42.0775	-0.0014648	0.18652	-0.0039063
0.974	-6.07	141.7784	1034.028461	-1.8067	0.73868	-0.19043	-7.632	136.053	992.2866	-1.666	0.62149	-0.3664	-16.845	-231.551	1291.524	-1.6639	0.54492	-0.45239	-11.197	39.9153	0.0987	0.15429	0.094241	-0.030518	20.983	42.2	69.6	0.024414	-0.21533	-0.0053711	68.3355	95.516	1376.139	-2.0464	0.66601	-0.62842	7.036	-35.846	30.884	-0.036621	0.22119	-0.0097656
0.976	37.028	99.005	1013.83	-1.7519	0.71368	-0.18457	-44.357	98.406	942.851	-1.6188	0.60782	-0.35117	-54.1049	-223.113	1277.356	-1.707	0.41602	-0.45166	11.905	-2.6412	11.6149	0.1499	0.10547	-0.036621	15.311	59.309	39.2959	0.023926	-0.21191	0.0017089	-13.877	57.359	1326.3708	-2.0308	0.66846	-0.61377	15.038	-37.086	65.9218	-0.069824	0.23999	-0.018799
0.978	39.5735	181.547	972.97	-1.694	0.6873	-0.1794	-8.915	189.418	915.796	-1.5748	0.59824	-0.33359	-88.259	-244.462	1304.702	-1.7993	0.31738	-0.43701	8.878	27.402	10.7951	0.13379	0.12842	-0.036133	-9.542	8.8953	39.2349	0.025879	-0.20654	0.0014648	16.102	89.109	1284.657	-2.0112	0.66455	-0.59326	5.357	-12.193	128.0668	-0.10645	0.25781	-0.036621
0.98	25.5294	152.2756	951.232	-1.6343	0.65869	-0.17822	-13.607	196.944	873.581	-1.5347	0.59229	-0.3208	7.889	-198.185	1340.6643	-1.8594	0.29785	-0.44141	-25.257	13.1259	9.4367	0.12695	0.13672	-0.036133	47.7377	-10.9605	39.353	0.01709	-0.20459	0.010742	-4.937	142.58	1224.594	-2.002	0.66309	-0.57813	-18.5984	-71.117	240.32	-0.17432	0.2793	-0.066406
0.982	34.817	120.079	927.6368	-1.577	0.63535	-0.18008	-26.203	159.4478	879.8527	-1.4824	0.58828	-0.30625	-11.444	-135.039	1334.598	-1.9805	0.32031	-0.4375	20.799	8.5474	31.936	0.11719	0.15869	-0.037598	34.69	8.96968	28.283	0.016113	-0.20215	0.016113	2.163	112.499	1247.6798	-1.978	0.64697	-0.55225	-24.7242	-62.258	387.352	-0.22119	0.2959	-0.089355
0.984	27.173	195.685	888.66	-1.5129	0.61455	-0.18203	35.5937	240.572	860.908	-1.4356	0.58691	-0.28769	-16.841	-134.607	1385.128	-2.062	0.39282	-0.43848	0.280000000000001	55.009	36.993	0.10499	0.17431	-0.038086	43.93464	-10.6642	47.523	0.003418	-0.20264	0.018555	83.37892	163.844	1241.026	-1.958	0.64014	-0.53956	-46.356	-79.724	453.679	-0.33154	0.3252	-0.13477
0.986	43.4715	151.605	895.758	-1.4457	0.59502	-0.18164	50.1269	190.188	845.234	-1.382	0.5748	-0.27129	39.9912	-88.032	1390.5956	-2.1304	0.50195	-0.4458	4.82	14.21209	32.853	0.097168	0.19092	-0.036621	60.4371	31.506	33.5007	-0.0070798	-0.19947	0.029052	27.831	129.76	1202.874	-1.9331	0.63818	-0.51904	-86.807	-115.0941	514.752	-0.4292	0.35376	-0.15845
0.988	39.605	216.489	857.5145	-1.3775	0.57637	-0.18203	23.059	209.074	811.489	-1.3337	0.56397	-0.25635	-0.667	-76.912	1402.894	-2.2012	0.65332	-0.47021	17.885	22.9448	25.1193	0.077148	0.21191	-0.031738	17.933	20.2237	22.104	-0.01709	-0.19678	0.035645	52.1764	100.93	1196.704	-1.8984	0.62988	-0.49414	-91.331	-69.373	549.862	-0.55225	0.38086	-0.16797
0.99	2.094	237.893	813.0796	-1.3081	0.55127	-0.18066	-15.3046	260.184	735.0009	-1.2813	0.5459	-0.2417	45.4791	-78.332	1471.972	-2.2285	0.73242	-0.47559	-2.031	37.456	13.7876	0.069824	0.22021	-0.026855	39.252	-0.1988	26.061	-0.03125	-0.19629	0.039063	48.962	155.681	1138.9332	-1.875	0.62402	-0.48438	-64.008	-75.085	594.1	-0.74561	0.43701	-0.16455
0.992	17.975	168.2758	769.95	-1.2444	0.52568	-0.18213	-51.3946	188.1317	695.265	-1.2336	0.52774	-0.22871	84.638	-39.544	1452.2424	-2.2871	0.86914	-0.48438	18.03	0.1375	16.3738	0.050781	0.24414	-0.025391	17.67	34.621	1.3271	-0.040527	-0.18848	0.044434	4.802	119.334	1125.1041	-1.8301	0.61133	-0.46484	-22.227	-69.827	651.847	-0.84766	0.46973	-0.15625
0.994	-13.263	217.873	704.4861	-1.182	0.50156	-0.18223	-36.922	247.009	660.641	-1.1831	0.51065	-0.21231	15.644	-72.044	1438.7544	-2.3374	0.95655	-0.49146	12.968	39.476	19.1366	0.039551	0.26319	-0.025147	2.548	13.1448	14.4079	-0.051758	-0.1792	0.047363	57.878	148.572	1112.5736	-1.7947	0.60034	-0.448	-1.012	-10.249	642.786	-1.0542	0.51709	-0.12842
0.996	-24.097	168.333	693.8702	-1.1225	0.48359	-0.17871	-11.082	215.774	636.085	-1.1331	0.49893	-0.19746	13.549	-62.078	1451.1288	-2.394	1.022	-0.49463	-10.229	16.2167	12.3627	0.026855	0.27734	-0.018555	28.846	15.0902	19.52132	-0.063233	-0.17334	0.052735	6.981	146.4559	1083.377	-1.7554	0.59619	-0.43701	-15.742	-15.2568	661.404	-1.2046	0.54346	-0.11572
0.998	9.46	147.2568	686.036	-1.0592	0.45596	-0.17881	-16.805	141.822	632.3404	-1.0808	0.48633	-0.19297	-44.6228	-30.534	1420.401	-2.4702	1.0903	-0.50244	27.419	-12.3732	15.2782	0.0068359	0.29785	-0.01416	-6.253	14.9378	9.7491	-0.066406	-0.16699	0.056641	-34.002	73.184	1059.691	-1.7031	0.59668	-0.40918	-22.436	9.85	681.441	-1.355	0.56885	-0.10938
1	-22.225	208.442	654.804	-0.99609	0.43262	-0.17871	-23.0821	190.042	590.183	-1.0283	0.47412	-0.18555	-42.3929	-61.4815	1465.528	-2.5054	1.1157	-0.50635	-15.238	9.363	25.1101	-0.0029297	0.31006	-0.01416	-19.6	-18.8206	19.9948	-0.065918	-0.15625	0.060059	5.245	113.339	1027.629	-1.6719	0.59863	-0.39697	-8.618	23.381	699.22	-1.54	0.61523	-0.11426
1.002	-33.924	145.881	631.756	-0.93242	0.40684	-0.17432	-36.67	145.0261	568.8594	-0.9665	0.45908	-0.18135	19.637	-32.6152	1505.4922	-2.5562	1.146	-0.52686	12.466	-40.6528	55.9828	-0.027832	0.32471	-0.016602	-0.907999999999994	12.51	3.2602	-0.069336	-0.15039	0.0625	-20.053	95.839	983.958	-1.6099	0.60596	-0.37744	-7.523	3.57400000000001	716.7465	-1.6211	0.64258	-0.11719
1.004	-23.145	177.487	597.617	-0.86397	0.37939	-0.17041	-12.593	166.38	556.01	-0.90634	0.44229	-0.17841	-6.529	-45.3948	1520.451	-2.5782	1.1592	-0.53125	12.964	-43.255	85.1305	-0.043457	0.33716	-0.021973	-33.99	11.8167	8.09454	-0.068848	-0.14209	0.0625	24.412	111.2685	984.58841	-1.562	0.60742	-0.35986	21.263	30.32209	721.828	-1.7944	0.729	-0.15186
1.006	-28.144	171.712	562.559	-0.80146	0.35674	-0.16807	11.381	197.874	523.6339	-0.8497	0.42783	-0.17061	5.73	-81.838	1564.235	-2.5894	1.1743	-0.53711	-31.6867	-30.485	100.4735	-0.0625	0.35107	-0.031738	-20.814	-7.66077	15.7915	-0.062256	-0.13916	0.068848	19.071	172.386	928.7755	-1.5117	0.60254	-0.34375	6.988	-14.372	724.643	-1.8838	0.80859	-0.16357
1.008	17.196	97.656	567.724	-0.7378	0.32646	-0.16768	-14.707	120.4141	506.1868	-0.80078	0.41094	-0.1584	18.4	-37.5332	1527.202	-2.5835	1.1821	-0.54053	-12.002	-62.862	168.7224	-0.093262	0.37305	-0.049805	-40.2672	23.6801	-2.57418	-0.052246	-0.14063	0.067383	-17.715	140.6056	880.138	-1.4468	0.59326	-0.31982	-27.058	-66.097	755.756	-1.9448	0.88916	-0.17969
1.01	-4.661	162.761	517.7998	-0.67578	0.30029	-0.16504	6.805	184.094	485.086	-0.75732	0.39893	-0.14307	16.759	-50.875	1516.146	-2.5762	1.1797	-0.54932	-32.3538	-27.173	215.56	-0.11572	0.37842	-0.05957	-52.0071	-13.1298	-4.8336	-0.037598	-0.14258	0.069336	28.582	181.945	854.995	-1.417	0.58594	-0.30859	-43.6847	-59.331	786.8	-1.9741	0.99854	-0.19873
1.012	-33.088	129.167	483.424	-0.61904	0.27373	-0.16465	-7.69499	174.602	441.825	-0.71894	0.38496	-0.13398	82.7864	-46.493	1552.366	-2.5483	1.1782	-0.56006	-61.351	-61.06	302.628	-0.16553	0.40381	-0.07959	-20.074	-11.59615	-0.0442	-0.028809	-0.146	0.068359	29.773	206.355	828.014	-1.353	0.56689	-0.28955	-13.723	-103.739	809.143	-1.9688	1.04	-0.20459
1.014	-19.795	142.218	447.837	-0.56435	0.24688	-0.16045	-36.919	152.134	432.306	-0.68623	0.37256	-0.11992	44.862	-4.046	1505.8521	-2.5107	1.1792	-0.56591	-60.248	-94.75754	417.403	-0.21704	0.4148	-0.094483	-49.6919	1.41	-2.031	-0.0092773	-0.15723	0.068359	26.657	176.02	833.3542	-1.3094	0.55396	-0.2688	74.8488	-107.751	850.707	-1.9194	1.0884	-0.21777
1.016	-26.102	187.093	405.703	-0.5124	0.225	-0.15459	-45.6247	208.242	408.804	-0.65576	0.36631	-0.10977	19.523	-53.681	1504.9669	-2.4683	1.1714	-0.56592	-115.956	-64.311	491.01	-0.28223	0.43018	-0.11328	-41.559	-14.3366	14.89635	0.0031738	-0.16455	0.065186	44.7533	226.972	785.6007	-1.2637	0.53711	-0.24609	54.736	-124.027	852.6047	-1.8623	1.0889	-0.22363
1.018	3.472	122.3602	413.132	-0.46875	0.20391	-0.15205	-46.7829	130.429	356.5854	-0.62158	0.35537	-0.096387	43.5142	-21.9353	1494.237	-2.418	1.1426	-0.57813	-151.705	-81.99	546.633	-0.38867	0.44922	-0.13965	-16.56	35.909	12.18097	0.012207	-0.17432	0.063965	-39.5878	198.164	723.761	-1.2051	0.5127	-0.23047	25.61	-201.8862	891.753	-1.7983	1.063	-0.2251
1.02	47.136	166.724	378.0737	-0.42676	0.18506	-0.14697	-39.376	133.6089	314.6991	-0.5835	0.34229	-0.093262	-32.505	4.2258	1474.6892	-2.3887	1.126	-0.5791	-129.083	-63.7966	577.762	-0.45068	0.45996	-0.15918	-61.2729	32.634	0.8017	0.030273	-0.19141	0.054688	-15.425	175.69936	707.5608	-1.1699	0.51074	-0.22607	51.041	-200.17	928.612	-1.7363	0.97461	-0.23926
1.022	3.478	158.834	343.0437	-0.383	0.1625	-0.14101	-51.7835	143.6735	266.3146	-0.54189	0.33526	-0.085352	-7.084	9.735	1522.712	-2.3394	1.0884	-0.57568	-123.296	-29.482	590.078	-0.59229	0.48145	-0.17334	-17.767	10.28803	14.0925	0.039551	-0.19922	0.048828	-4.602	202.67683	655.0154	-1.1011	0.49756	-0.20605	26.989	-220.776	990.329	-1.7051	0.91602	-0.2417
1.024	24.773	109.055	332.2611	-0.34903	0.14043	-0.13926	-46.6172	90.411	262.48069	-0.50107	0.32881	-0.081738	12.808	85.041	1470.1275	-2.3044	1.0608	-0.57788	-33.1476	-71.3051	660.362	-0.71851	0.49488	-0.18457	-11.16	44.15	-4.9841	0.04248	-0.20996	0.037109	-47.3641	147.061	640.105	-1.0308	0.47705	-0.19775	7.83	-264.778	1068.058	-1.6719	0.80078	-0.24072
1.026	15.16	162.6355	290.7696	-0.30957	0.12129	-0.12988	-33.4077	133.3101	279.539	-0.46006	0.3167	-0.072363	-19.719	42.244	1432.4401	-2.2676	1.0293	-0.57617	-8.898	-41.5487	679.112	-0.85791	0.51611	-0.19043	-9.613	21.0813	-10.6384	0.048584	-0.21533	0.035644	17.265	164.644	612.9983	-0.99756	0.46729	-0.18994	-12.847	-263.007	1111.963	-1.6697	0.72339	-0.24463
1.028	12.916	104.4729	268.7083	-0.27568	0.097949	-0.12158	-22.0268	120.356	252.6013	-0.42051	0.30518	-0.065429	21.393	26.973	1448.361	-2.2285	0.98828	-0.57227	-36.724	-16.741	693.51204	-1.0586	0.54199	-0.17969	30.388	40.063	-15.5455	0.047852	-0.21436	0.021973	-16.175	169.66549	558.9037	-0.9248	0.4375	-0.17627	-64.684	-317.833	1123.702	-1.6772	0.66455	-0.25049
1.03	71.241	106.5979	254.2621	-0.24365	0.07666	-0.11914	-14.5718	105.905	200.038	-0.38184	0.29541	-0.057129	2.985	62.3709	1400.5581	-2.2046	0.97998	-0.56787	-7.59099999999999	-15.2388	753.9127	-1.1602	0.55762	-0.17285	-0.809000000000001	55.543	-29.2113	0.043945	-0.21924	0.012207	-19.3184	125.56104	560.155	-0.86963	0.4209	-0.1648	-52.598	-305.507	1147.43791	-1.7085	0.61377	-0.25537
1.032	38.743	139.955	200.8472	-0.21113	0.058691	-0.11464	-13.2538	161.363	173.8697	-0.34795	0.28252	-0.053223	34.241	34.051	1414.8772	-2.166	0.94629	-0.57227	-3.287	33.3537	772.8997	-1.4004	0.58301	-0.1709	9.203	15.9983	-14.3623	0.036133	-0.21582	0.0078125	-2.364	174.98	513.445	-0.82129	0.39844	-0.15186	-26.9829	-209.168	1152.829	-1.7319	0.59424	-0.26367
1.034	43.8779	87.6364	200.06708	-0.18701	0.036817	-0.10801	-3.233	114.34	173.163	-0.31279	0.26905	-0.047266	103.9462	81.919	1432.7264	-2.1363	0.92139	-0.57129	9.285	-6.2763	791.3498	-1.6006	0.625	-0.16943	36.454	37.616	7.2222	0.018555	-0.21045	0.00048828	-12.378	151.362	505.8727	-0.7666	0.37305	-0.1377	-62.271	-158.573	1212.3772	-1.7969	0.57422	-0.25879
1.036	41.5113	128.109	207.424	-0.15537	0.016894	-0.10371	0.511000000000003	125.352	188.005	-0.27998	0.25615	-0.039844	36.468	85.62	1389.681	-2.103	0.90088	-0.57471	31.047	-66.624	806.1631	-1.8198	0.68799	-0.18848	21.824	37.186	3.1837	-0.0026856	-0.20166	-0.0048828	33.297	145.475	495.4666	-0.73242	0.35498	-0.13086	-49.053	-94.538	1257.647	-1.8455	0.594	-0.2605
1.038	6.578	126.658	193.4292	-0.13232	-0.0022461	-0.10371	-8.4032	137.297	159.5864	-0.25449	0.24551	-0.036328	38.162	40.122	1402.4537	-2.0659	0.87158	-0.56787	30.186	-77.366	829.871	-2.0801	0.79102	-0.19629	47.27831	22.8441	27.152	-0.023926	-0.18848	-0.0078125	13.551	171.478	454.2075	-0.67725	0.33154	-0.11914	-65.307	-81.472	1228.2064	-1.9082	0.62305	-0.27148
1.04	57.3054	84.164	209.36307	-0.11084	-0.022461	-0.1001	-10.324	59.764	140.083	-0.22607	0.23242	-0.029785	66.212	82.8509	1366.1529	-2.0522	0.85791	-0.56396	11.637	-139.765	890.402	-2.1797	0.84375	-0.20166	32.843	60.412	20.1469	-0.053711	-0.16016	-0.0083008	-57.666	122.7124	435.1699	-0.63745	0.31348	-0.10669	-51.001	-109.451	1254.854	-2.0015	0.67529	-0.30273
1.042	28.863	113.69597	158.062	-0.091504	-0.037597	-0.094531	-6.69	76.551	133.375	-0.20586	0.22373	-0.023535	11.77	61.2375	1358.4305	-2.0293	0.83398	-0.55469	-16.892	-97.467	940.927	-2.312	0.95557	-0.22021	19.354	21.8688	16.0055	-0.07959	-0.13989	-0.0065918	-16.3091	163.333	404.3948	-0.59229	0.29639	-0.1001	-18.863	-55.209	1294.2201	-2.0488	0.70898	-0.31543
1.044	11.393	67.663	128.0761	-0.075781	-0.057519	-0.090234	-33.2238	46.401	106.018	-0.18476	0.20859	-0.02041	53.219	73.951	1380.256	-2.0124	0.80981	-0.54175	7.024	-83.22	939.897	-2.3308	1.0295	-0.22509	42.308	21.3644	24.0011	-0.10742	-0.11475	-0.003418	-31.8154	173.175	353.198	-0.5293	0.27197	-0.09375	-61.132	-46.313	1333.072	-2.1465	0.76758	-0.34375
1.046	12.664	61.047	130.703	-0.058594	-0.069629	-0.089844	-30.353	39.485	88.701	-0.16563	0.20274	-0.019629	29.776	100.74	1327.941	-2.0024	0.78467	-0.54053	71.9585	-151.385	953.041	-2.2969	1.0957	-0.25391	14.869	41.2591	-12.3038	-0.1377	-0.076172	-0.0058594	-23.209	133.13	349.00172	-0.50049	0.26416	-0.091309	-49.8271	-50.659	1395.4931	-2.2312	0.81861	-0.36108
1.048	-27.184	100.992	87.5262	-0.045898	-0.079785	-0.084961	5.006	110.452	51.42903	-0.15137	0.19434	-0.0083985	-11.455	31.385	1280.993	-1.9746	0.77246	-0.53516	75.77949	-161.05531	961.882	-2.1655	1.1558	-0.29004	22.053	9.411	21.4595	-0.15283	-0.067383	-0.00048828	-6.145	162.95	297.0783	-0.44189	0.23828	-0.092285	-76.006	-29.913	1371.352	-2.3223	0.87305	-0.37695
1.05	-1.489	72.425	104.3339	-0.035645	-0.089355	-0.081543	15.694	55.3622	58.6316	-0.13818	0.19189	-0.010254	25.515	56.232	1261.884	-1.9629	0.76953	-0.53125	73.5912	-219.119	1000.9966	-2.0811	1.1621	-0.31055	37.28	34.268	24.6569	-0.17822	-0.02002	0.00048828	-59.64	118.8313	270.231	-0.39942	0.21924	-0.079345	-113.2	-103.8112	1391.486	-2.4473	0.9502	-0.39258
1.052	-2.695	91.947	88.5645	-0.029883	-0.099509	-0.076562	-4.036	55.996	67.2955	-0.12373	0.1833	-0.0081054	-2.121	80.7856	1221.9899	-1.918	0.7793	-0.51563	88.844	-238.571	1082.23	-1.8921	1.1333	-0.35059	-25.0921	31.426	11.1598	-0.18799	0.0058592	-0.00048828	-22.28	114.3021	272.234	-0.35742	0.20361	-0.07959	-58.4505	-103.0898	1471.24	-2.5029	0.99023	-0.40332
1.054	-34.6586	74.381	59.671	-0.02373	-0.1039	-0.074121	4.558	54.706	29.0084	-0.11338	0.1792	-0.0017578	43.903	75.913	1234.933	-1.8798	0.76709	-0.49561	74.006	-205.86249	1124.211	-1.7593	1.0571	-0.36817	1.579	23.5217	37.3276	-0.19922	0.031738	-0.0014648	-19.3466	138.603	244.3902	-0.31006	0.17383	-0.067871	-43.919	-92.281516	1503.14	-2.6035	1.0674	-0.41016
1.056	-12.863	37.1297	87.6369	-0.024121	-0.1039	-0.064356	17.302	12.774	33.14	-0.098534	0.17881	0.0017578	68.8375	155.2	1178.157	-1.8413	0.75439	-0.48584	28.576	-268.337	1180.876	-1.6523	0.94922	-0.36523	-10.391	58.691	15.4456	-0.20459	0.064453	-0.00048828	-13.811	88.786	247.059	-0.28711	0.15918	-0.060059	-39.4998	-120.661	1529.628	-2.666	1.1191	-0.43188
1.058	-37.245	94.139	55.3098	-0.02002	-0.099805	-0.061035	29.778	78.393	32.3436	-0.08789	0.16631	0.0078125	15.175	129.743	1133.689	-1.791	0.72998	-0.46875	-2.766	-267.603	1224.572	-1.5581	0.77783	-0.34912	-41.0251	25.9974	26.8083	-0.20215	0.081543	-0.0014648	16.673	116.985	222.8811	-0.25342	0.13232	-0.04834	-12.0589	-87.314	1513.874	-2.7104	1.1704	-0.43408
1.06	-32.4436	67.476	55.2843	-0.023926	-0.091797	-0.056152	8.488	64.588	33.6396	-0.077148	0.16309	0.01123	65.3073	139.63	1141.02806	-1.7637	0.71387	-0.45703	-38.7132	-241.094	1235.988	-1.5352	0.69531	-0.3418	-15.415	17.0474	42.155	-0.19971	0.104	-0.0029297	-33.1312	120.443	189.832	-0.23364	0.11597	-0.040283	-39.5401	-118.805	1468.657	-2.7539	1.2295	-0.43359
1.062	-5.536	58.76	65.5731	-0.022363	-0.080176	-0.050684	-9.206	37.423	33.421	-0.063965	0.15732	0.014648	42.56	186.679	1097.18108	-1.7124	0.69385	-0.43408	-10.8628	-247.664	1275.1085	-1.5273	0.54883	-0.32324	-66.1134	26.5901	12.9195	-0.19336	0.12182	-0.01123	-27.5325	94.725	187.1662	-0.21924	0.10352	-0.026367	6.8461	-136.776	1518.135	-2.7734	1.25	-0.42676
1.064	-61.3676	56.982	32.7142	-0.017187	-0.077832	-0.045019	-16.876	69.127	8.131	-0.046876	0.14863	0.020606	17.018	141.064	1095.2177	-1.6717	0.68482	-0.42163	-20.5972	-144.79	1278.239	-1.5393	0.46314	-0.30445	-34	7.502	27.692	-0.18164	0.13281	-0.017578	21.545	141.62	173.755	-0.20459	0.085449	-0.013184	39.9027	-71.832	1512.497	-2.8047	1.2949	-0.42383
1.066	-17.61	13.1941	35.9276	-0.013672	-0.066504	-0.042285	-12.356	17.1273	21.1188	-0.027344	0.13613	0.021777	34.966	168.836	1081.3716	-1.6289	0.67773	-0.41113	-43.075	-107.452	1286.754	-1.5723	0.39648	-0.28516	-15.14	27.5281	32.9699	-0.15869	0.14307	-0.022949	-26.1949	103.083	174.326	-0.2002	0.086914	-0.0043945	-8.987	-73.209	1513.1706	-2.8279	1.325	-0.41333
1.068	-10.985	48.931	20.7065	-0.0073242	-0.058692	-0.035644	-6.668	32.273	37.0755	-0.0078129	0.12539	0.027246	-42.1032	159.872	1039.9356	-1.5781	0.66406	-0.39355	-42.18977	-123.386	1327.3625	-1.6519	0.34717	-0.26709	-53.0069	19.7487	30.468	-0.14453	0.14648	-0.027344	14.283	89.471	167.491	-0.18896	0.081055	0.0024414	11.8236	-21.125	1551.14	-2.8413	1.3521	-0.39844
1.07	-48.9472	57.916	21.73394	0.0048828	-0.055664	-0.029785	-12.65	34.708	12.607	0.013672	0.11572	0.029785	-29.916	114.453	1024.3314	-1.5332	0.6521	-0.38038	-58.226	-77.508	1323.745	-1.6968	0.33691	-0.26611	-20.274	-16.1307	34.1224	-0.11865	0.15234	-0.034668	9.262	88.7976	115.723	-0.17798	0.08252	0.010498	-40.9456	53.392	1511.3845	-2.8535	1.3789	-0.37891
1.072	9.484	37.3622	52.0019	0.012402	-0.05166	-0.035938	-7.325	-8.0745	2.927	0.032032	0.10205	0.033594	2.926	170.1004	965.5798	-1.4863	0.64258	-0.37012	-35.224	-130.368	1349.0754	-1.814	0.36133	-0.28857	-37.163	16.5445	8.6275	-0.099119	0.15137	-0.044678	-47.9882	43.907	110.697	-0.16846	0.086426	0.0073242	-52.186	51.281	1509.54	-2.8516	1.3926	-0.37012
1.074	-0.702000000000002	54.423	30.4967	0.027929	-0.046387	-0.033789	-12.186	22.567	-1.31933	0.047365	0.087207	0.034766	-35.395	149.1272	934.378	-1.4277	0.61914	-0.34863	-23.024	-126.115	1396.717	-1.9033	0.43165	-0.30542	-46.8697	-2.3445	22.5087	-0.084473	0.14893	-0.050293	5.322	70.6516	108.987	-0.14502	0.087402	0.025879	15.7426	109.987	1481.922	-2.8398	1.4004	-0.34766
1.076	-21.4502	6.314	18.1578	0.042383	-0.047168	-0.033398	-7.719	-4.632	-7.8778	0.061035	0.074706	0.039844	9.742	157.385	939.6689	-1.3979	0.61279	-0.33838	-46.4754	-70.065	1403.5651	-1.9995	0.52393	-0.33057	-1.453	-3.2838	27.063	-0.060059	0.14111	-0.063477	-20.7256	76.52	79.1492	-0.13281	0.087891	0.027832	-16.9002	93.648	1442.215	-2.8239	1.3977	-0.32788
1.078	34.683	-12.4692	34.721	0.053125	-0.047851	-0.031543	-7.69	-17.7329	22.4249	0.068067	0.060742	0.044825	-12.053	187.864	880.7567	-1.3394	0.59229	-0.3208	-51.94	-111.1261	1416.6579	-2.1367	0.66504	-0.36279	-16.41	4.4388	28.197	-0.050293	0.13623	-0.081055	-11.633	54.491	81.9195	-0.10645	0.092773	0.035645	-24.5853	42.7669	1488.11865	-2.8003	1.3892	-0.31152
1.08	17.723	11.7843	26.631	0.065918	-0.053711	-0.032227	7.551	35.2192	38.417	0.078125	0.047363	0.050781	-34.4942	137.409	866.1035	-1.3033	0.58521	-0.30274	-52.2314	-74.744	1434.1621	-2.2051	0.74414	-0.37305	-6.487	-31.668	17.9122	-0.032227	0.12744	-0.094727	16.558	68.635	53.0419	-0.085694	0.087647	0.042968	-49.894	67.148	1463.595	-2.7593	1.3638	-0.29932
1.082	31.725	-13.3822	36.8238	0.076855	-0.054492	-0.031348	5.68	9.60925	32.2239	0.079297	0.033302	0.060058	18.543	169.537	850.165	-1.2617	0.57617	-0.28955	-95.579	-104.522	1422.0862	-2.3374	0.88135	-0.38867	18.051	-2.320254	7.4072	-0.017334	0.11206	-0.10596	-17.75	37.093	21.6475	-0.064941	0.081543	0.045898	-70.925	14.8442	1447.8261	-2.7324	1.3477	-0.29102
1.084	34.537	27.121	8.2457	0.084668	-0.056055	-0.034375	-3.344	41.723	44.742	0.078223	0.020707	0.062888	2.129	169.696	838.376	-1.2012	0.56836	-0.27832	-79.568	-173.379	1493.04	-2.4648	1.0137	-0.40039	0.937999999999999	17.8839	1.6736	-0.0014648	0.097168	-0.12354	13.058	39.225	54.599	-0.036133	0.070801	0.05957	-37.611	27.9732	1475.946	-2.6851	1.2993	-0.27539
1.086	0.960999999999999	40.491	-14.9226	0.087403	-0.059179	-0.029297	-30.0696	61.125	12.34985	0.078612	0.0043012	0.073044	7.211	152.198	832.43	-1.168	0.56738	-0.271	-50.2724	-129.54	1500.392	-2.5176	1.0781	-0.40674	30.282	0.62616	29.6728	0.012207	0.078613	-0.14453	24.541	70.945	19.7631	-0.025391	0.060547	0.063477	-48.183	45.2291	1460.938	-2.6309	1.248	-0.26074
1.088	20.426	3.34326	24.3528	0.091016	-0.061523	-0.027148	-32.773	19.9793	24.0632	0.074611	-0.0097621	0.078808	-0.779	218.92	758.912	-1.0977	0.55957	-0.25879	-34.604	-161.726	1503.846	-2.6094	1.1758	-0.41016	24.404	25.214	35.68	0.019531	0.068848	-0.15674	0.0470000000000006	39.741	41.3855	-0.0024414	0.055176	0.073242	-65.805	2.4924	1472.766	-2.603	1.2114	-0.25537
1.09	27.528	32.257	10.1584	0.09082	-0.062012	-0.019531	0.382999999999996	44.0275	32.53	0.068359	-0.019531	0.085938	-51.0165	199.438	714.8194	-1.0457	0.54517	-0.25244	-23.5612	-151.277	1522.312	-2.6675	1.2388	-0.40649	1.153	-36.77418	37.2	0.025391	0.046875	-0.18506	27.333	52.846	42.19	0.0078126	0.044922	0.079834	-63.123	52.557	1475.93118	-2.5581	1.1489	-0.24219
1.092	14.126	2.9935	36.67	0.091601	-0.064453	-0.014258	-9.878	1.0642	21.98	0.063572	-0.029008	0.09473	-15.666	210.264	696.872	-0.99609	0.53125	-0.24268	-36.6439	-82.0796	1501.56	-2.7188	1.2949	-0.40332	48.8853	-60.239	61.733	0.019043	0.040039	-0.21021	-27.6941	30.9489	21.8693	0.014648	0.038086	0.087891	-134.853	57.428	1450.4455	-2.5225	1.1079	-0.23267
1.094	30.137	13.0126	38.502	0.08291	-0.061328	-0.013965	-7.215	-9.44421	15.988766	0.062506	-0.037113	0.10107	-43.1135	227.22	663.0514	-0.9292	0.51318	-0.22852	-15.6586	-130.183	1519.2274	-2.7734	1.3486	-0.39355	0.970000000000002	-46.2655	47.3074	0.0087891	0.033691	-0.22949	-27.203	-7.7351	50.397	0.027832	0.032715	0.1001	-98.647	31.3687	1486.212	-2.4941	1.0664	-0.22119
1.096	-1.289	36.618	14.9695	0.078222	-0.057031	-0.0084961	8.35	35.822	-1.2128	0.067972	-0.042586	0.10655	-56.564	167.7162	655.887	-0.90039	0.50439	-0.21826	11.094	-61.5569	1509.7493	-2.7905	1.3735	-0.38525	25.1871	-82.653548	93.4823	-0.013184	0.027344	-0.25488	-5.503	24.7737	27.698	0.029297	0.025391	0.098145	-77.597	63.7364	1455.711	-2.4458	1.0317	-0.2085
1.098	16.748	-5.7557	28.5289	0.069336	-0.054981	0.0019531	15.916	4.1997	8.0361	0.07482	-0.050399	0.10957	16.4914	189.1877	619.213	-0.83838	0.4751	-0.2041	0.82917	-20.056	1476.704	-2.8164	1.4121	-0.37695	50.563	-70.049	120.5871	-0.036133	0.021484	-0.26172	-12.504	17.8701	2.93	0.040527	0.022949	0.10205	-103.126	24.351	1399.563	-2.4214	1.0142	-0.19873
1.1	-2.785	20.3618	15.8216	0.059082	-0.045898	0.0068359	18.578	20.82989	31.05	0.092285	-0.057617	0.11523	-31.12928	163.6884	575.58	-0.79077	0.45679	-0.19532	-10.8579	-50.5586	1487.3233	-2.8103	1.4309	-0.37452	16.851	-69.55	119.09	-0.083008	0.032227	-0.2832	15.148	9.864	12.8526	0.052978	0.013428	0.10279	-58.556	39.344	1382.76	-2.3613	0.98438	-0.19434
1.102	-19.941	27.1888	-3.8083	0.055469	-0.038184	0.012598	6.385	39.1856	10.2107	0.11021	-0.064352	0.11826	-19.664	136.2622	558.557	-0.74072	0.44092	-0.18994	-26.1285	21.934	1480.292	-2.7832	1.4434	-0.36914	43.235	-101.1637	201.634	-0.13208	0.035889	-0.28882	-23.576	14.4145	-17.78803	0.062012	0.0083008	0.104	-97.476	102.038	1309.6974	-2.3047	0.9668	-0.18604
1.104	38.738	2.71896	14.2192	0.050097	-0.030859	0.016992	13.628	0.194899999999999	11.5787	0.1264	-0.072253	0.11639	-13.702	183.773	512.1871	-0.67969	0.41602	-0.17871	-17.4529	-11.2933	1476.5087	-2.7344	1.4355	-0.36621	25.973	-35.504	269.5223	-0.18701	0.041016	-0.30078	-25.7829	-26.2291	-7.5407	0.072266	-0.0043945	0.10791	-114.515	100.386	1300.468	-2.2422	0.94727	-0.17725
1.106	-17.811	30.29	5.076	0.04502	-0.019141	0.023633	8.525	21.5566	42.37	0.1494	-0.077318	0.11759	-25.3014	161.613	487.2	-0.64746	0.40674	-0.17041	2.9556	-10.3174	1474.6575	-2.7051	1.4336	-0.36914	-0.798999999999999	-8.21732	389.986	-0.27539	0.054199	-0.33594	34.593	-1.1516	18.5304	0.074707	-0.010254	0.10986	-52.798	161.117	1291.715	-2.146	0.91455	-0.18018
1.108	-35.4401	4.091	18.4391	0.042969	-0.014844	0.023926	-1.817	-0.3729	26.7837	0.17114	-0.086401	0.11015	30.5806	161.528	474.0802	-0.58252	0.3833	-0.16455	-5.5474	61.567	1439.257	-2.6499	1.4126	-0.36621	20.138	46.864	533.444	-0.32666	0.064453	-0.35254	-8.661	10.28124	13.7782	0.07959	-0.026855	0.1167	-67.979	145.368	1233.763	-2.1011	0.89502	-0.17676
1.11	-15.239	-0.8022	29.146	0.042969	-0.0097656	0.027832	2.129	-9.5405	47.04	0.19141	-0.10352	0.11084	-21.44711	171.742	440.022	-0.53247	0.37256	-0.15893	-28.839	1.727	1436.194	-2.616	1.3919	-0.35864	-1.483	120.629	630.219	-0.45117	0.087402	-0.39648	-1.89	7.0342	46.77855	0.081787	-0.037109	0.12255	-34.087	88.71	1249.7309	-2	0.84961	-0.16602
1.112	-52.2506	14.6936	9.5015	0.045605	-0.0037109	0.030371	4.273	27.108	28.7361	0.21084	-0.11647	0.1024	-57.558	122.11993	439.339	-0.4873	0.35156	-0.1543	-25.24259	49.775	1450.2617	-2.5913	1.3677	-0.34814	-29.76	80.4363	726.803	-0.56055	0.11988	-0.41748	4.777	45.24	27.4922	0.080566	-0.044922	0.12744	-11.277159	114.51	1228.963	-1.9333	0.81762	-0.15698
1.114	-18.891	-2.93655	27.51921	0.050977	-0.0068359	0.027734	-15.158	-0.4231	15.4485	0.2293	-0.13228	0.10132	-19.9174	161.885	408.627	-0.42822	0.3335	-0.1416	-52.009	50.542	1440.170533	-2.5684	1.3301	-0.34473	-38.315	69.767	799.9645	-0.68018	0.15869	-0.43506	-32.744	40.872	-1.3815	0.081543	-0.052734	0.1416	-54.031	90.8246	1206.424	-1.8691	0.78516	-0.15137
1.116	-18.517	22.4408	15.0376	0.057617	-0.01543	0.026172	-11.591	7.0581	18.8888	0.24817	-0.15184	0.092398	-27.886	161.108	388.509	-0.39648	0.32227	-0.13623	-50.138	-18.9899	1479.0736	-2.5674	1.3076	-0.33594	-58.95596	33.78	874.242	-0.85498	0.22314	-0.43652	-0.646000000000001	32.5488	9.2179	0.080566	-0.058594	0.146	2.627	119.967	1215.514	-1.7827	0.73779	-0.14014
1.118	-61.7847	31.031	7.1346	0.063574	-0.030664	0.020801	4.297	25.2323	-1.243	0.26214	-0.16868	0.084176	-23.1486	114.326	373.799	-0.34814	0.30615	-0.12695	-31.474	25.28268	1467.033	-2.5508	1.2695	-0.33105	-9.782	-24.847	960.166	-0.9541	0.25293	-0.42578	-5.812	32.039	0.1182	0.089355	-0.064453	0.1543	-5.3014	159.545	1164.2358	-1.7417	0.71338	-0.1377
1.12	-17.368	-1.107	27.1797	0.066895	-0.04248	0.018555	8.957	1.2562	11.6474	0.27539	-0.18555	0.079102	-31.1544	136.927	306.0827	-0.3125	0.29444	-0.11963	-67.896	-26.5235	1437.5087	-2.5359	1.2395	-0.32324	7.289	20.014	980.115	-1.1621	0.33301	-0.38135	-16.686	1.197	14.4762	0.096925	-0.065185	0.1521	-45.2142	102.135	1142.9669	-1.6675	0.6626	-0.12354
1.122	-19.114	42.725	2.0283	0.068555	-0.062891	0.014746	12.503	37.334	5.5718	0.28872	-0.19845	0.075918	-74.619	94	278.3238	-0.28516	0.2793	-0.10938	-73.871	-10.1424	1446.083	-2.5171	1.2114	-0.31787	-16.041	-21.501	909.85	-1.3311	0.39697	-0.34375	25.088	13.32352	7.693	0.10254	-0.075684	0.15576	11.7018	120.033	1118.711	-1.6111	0.62622	-0.12329
1.124	-1.071	16.3993	8.9132	0.071387	-0.08291	0.010351	1.59	10.4427	-4.2742	0.30062	-0.2161	0.064499	-20.6409	105.98	246.909	-0.24463	0.26123	-0.10059	-91.337	76.833	1404.4882	-2.48	1.1821	-0.31396	19.0924	-89.42212	870.035	-1.5215	0.47266	-0.29688	-15.238	21.5988	-11.0999	0.12549	-0.082031	0.15039	-8.0462	108.657	1060.0917	-1.5586	0.59766	-0.11865
1.126	17.253	-3.2895	20.802	0.072168	-0.10323	0.0021484	-13.335	1.62643	-1.1598	0.31031	-0.2305	0.057709	-28.7812	125.465	218.8424	-0.2207	0.25049	-0.092285	-102.201	21.9645	1396.625	-2.4551	1.1709	-0.31055	-30.814	-106.156	820.83766	-1.8208	0.58057	-0.25342	0.954999999999998	-4.8351	21.9085	0.13623	-0.083496	0.15088	27.0687	87.3368	1067.4729	-1.4917	0.56104	-0.11279
1.128	-16.708	31.578	-6.4036	0.069629	-0.12031	-0.0032227	-17.605	55.268	-4.24796	0.31688	-0.24184	0.052453	-44.4862	72.088	223.7056	-0.18555	0.22949	-0.084473	-73.943	68.862	1384.0766	-2.4004	1.1504	-0.30811	-8.0727	-149.968	859.391	-1.978	0.63916	-0.23584	26.487	21.0556	23.6326	0.16016	-0.098633	0.13184	34.2374	140.092	1023.30771	-1.4526	0.54248	-0.11719
1.13	-0.439999999999998	0.8108	5.081	0.061523	-0.14209	-0.0073242	-22.308	17.6237	1.805	0.31787	-0.24512	0.038086	-18.22	106.718	174.1146	-0.16089	0.21387	-0.079834	-83.702	69.528	1351.4627	-2.3513	1.1292	-0.30738	23.6273	-106.518	933.52015	-2.3359	0.79492	-0.25244	-10.318	24.9454	15.665	0.17847	-0.10913	0.12183	-33.5697	101.6181	982.5794	-1.3789	0.51465	-0.11328
1.132	23.921	39.4331	9.202	0.05498	-0.15879	-0.0074219	-1.351	31.726	22.5498	0.31942	-0.24976	0.029711	-45.5927	101.243	141.065	-0.13428	0.2041	-0.072754	-83.846	25.581	1355.538	-2.3027	1.1094	-0.30664	-40.07	-71.54	942.003	-2.5086	0.92505	-0.25366	20.6	22.7096	18.0839	0.1958	-0.12305	0.10791	11.317	129.4573	972.6706	-1.324	0.48804	-0.11133
1.134	-0.267999999999997	47.668	9.2521	0.044922	-0.17315	-0.011621	-13.348	35.812	29.5899	0.31751	-0.2472	0.016883	6.047	100.823	143.3447	-0.1001	0.18164	-0.061035	-79.809	132.924	1327.545	-2.2319	1.0708	-0.31299	-34.9091	-104.497	969.735	-2.605	1.0454	-0.26221	0.776999999999997	31.122	-0.348400000000001	0.21387	-0.13672	0.086914	6.403	178.361	909.8711	-1.2646	0.46191	-0.10938
1.136	22.831	6.5505	27.1564	0.030078	-0.18056	-0.0167	-16.148	-6.3318	26.8929	0.31363	-0.2408	-0.00030732	1.665	139.475	134.3502	-0.08252	0.17285	-0.059082	-85.64	117.26	1284.6314	-2.1929	1.0532	-0.31299	-64.666	-103.93	943.245	-2.5542	1.1841	-0.27686	-35.7977	-0.519	21.6169	0.21973	-0.146	0.075195	-15.7546	166.1063	912.224	-1.1846	0.42529	-0.1084
1.138	23.046	42.596	11.2014	0.02041	-0.18818	-0.019434	-5.468	24.545	13.0179	0.30132	-0.22664	-0.010025	-55.029	91.4263	134.441	-0.049316	0.15186	-0.049805	-51.259	108.183	1279.86769	-2.1211	1.0176	-0.30615	-6.328	-122.631	951.3239	-2.4746	1.2441	-0.29443	14.098	20.3915	29.2719	0.22852	-0.15967	0.055664	13.3102	232.398	880.0595	-1.147	0.40771	-0.104
1.14	9.394	19.7213	12.6162	0.0073242	-0.19043	-0.015137	-14.5624	20.201	-4.3786	0.28955	-0.21094	-0.027344	2.975	88.5934	97.208	-0.026123	0.13428	-0.042481	-49.162	159.034	1238.9141	-2.0661	0.98951	-0.30762	66.703	-119.135	1015.57518	-2.2559	1.3281	-0.35156	8.006	22.01187	9.5454	0.22607	-0.17114	0.045899	-52.378	236.795	823.2554	-1.0703	0.37012	-0.098633
1.142	45.1471	17.4815	24.793	-0.0022461	-0.18643	-0.018457	-3.044	15.3853	1.351	0.27567	-0.18791	-0.036828	-34.4559	98.474	51.697	-0.0053711	0.12207	-0.034668	-61.084	83.389	1219.2348	-2.0156	0.96387	-0.30078	50.711	-59.53	1048.116	-2.0762	1.3521	-0.40381	-4.849	9.0545	19.7994	0.22656	-0.17871	0.033203	-50.8791	217.006	808.6984	-1.0188	0.34692	-0.093506
1.144	22.154	41.25	19.7287	-0.01543	-0.17978	-0.017676	25.662	35.433	6.64644	0.26021	-0.16596	-0.049486	-44.377	54.772	58.0735	0.020508	0.10156	-0.026367	-23.73478	131.866	1218.382	-1.9468	0.91553	-0.29102	65.3428	-100.28	1065.122	-1.9063	1.3262	-0.4502	7.843	33.4568	13.125	0.21826	-0.18213	0.018066	-41.25259	245.329	750.6216	-0.96289	0.32031	-0.085449
1.146	20.702	-2.4438	33.222	-0.028711	-0.1665	-0.021191	-4.519	-6.6613	3.564	0.24017	-0.13967	-0.056813	27.475	74.219	60.54	0.035645	0.09375	-0.024902	-27.2946	147.45	1192.207	-1.9038	0.89893	-0.29102	63.3081	-170.969	1062.799	-1.7461	1.1729	-0.48438	-27.592	27.9904	14.3205	0.20801	-0.18604	0.010254	-76.598	177.158	733.4587	-0.88867	0.28906	-0.082031
1.148	13.628	17.8481	5.695	-0.039649	-0.15117	-0.020898	1.217	15.1038	17.7608	0.22412	-0.11602	-0.070971	-9.574	54.881	40.289	0.057129	0.077637	-0.016113	-16.555	96.3942	1197.9555	-1.8223	0.86719	-0.27783	44.672117	-224.8122	1050.091	-1.6895	1.0527	-0.49219	13.691	26.432	32.3899	0.19629	-0.18457	-0.0024414	-9.221	168.3897	722.54765	-0.8501	0.27783	-0.080078
1.15	8.146	29.5931	3.7285	-0.050293	-0.13037	-0.01709	-2.992	41.786	19.6028	0.2041	-0.093262	-0.078613	-2.04	28.8666	25.927	0.073974	0.067627	-0.012207	6.233	152.945	1168.412	-1.7546	0.84888	-0.27808	61.3118	-314.169	1127.478	-1.6152	0.78711	-0.48047	6.605	39.715	9.63597	0.18482	-0.1792	-0.0041504	-33.09924	193.264	669.493	-0.77881	0.24805	-0.072754
1.152	21.884	4.8448	30.4643	-0.062988	-0.10977	-0.011328	-3.774	10.569	33.3694	0.18968	-0.066808	-0.088082	8.847	52.987	14.0113	0.092285	0.056641	-0.0083008	-5.0204	86.6119	1125.3614	-1.6875	0.82813	-0.27783	44.916	-288.932	1183.4374	-1.5981	0.59619	-0.46826	-23.37	6.7433	12.8267	0.17676	-0.16797	-0.010742	-72.352	156.5091	655.66	-0.72412	0.22998	-0.066162
1.154	-9.351	53.129	21.4215	-0.074707	-0.085352	-0.010058	19.696	44.1676	38.762	0.1734	-0.04186	-0.096852	5.523	13.7046	33.86295	0.11035	0.03418	0.00097656	13.465	68.296	1113.945	-1.5957	0.79297	-0.27148	-36.78	-261.291	1208.741	-1.603	0.43604	-0.44971	9.812	13.80738	-1.3531	0.16016	-0.15479	-0.01709	-36.861	207.88	642.394	-0.67773	0.2085	-0.061035
1.156	-6.354	21.6761	24.166	-0.080566	-0.065821	-0.009668	1.461	32.89	13.15328	0.15693	-0.020256	-0.10185	14.541	24.7551	44.9605	0.11523	0.027832	0.0043945	18.7683	137.342	1075.2269	-1.5469	0.76953	-0.27148	-54.703	-294.701	1251.794	-1.6558	0.27637	-0.42041	-31.81	24.8565	-17.969	0.15332	-0.14111	-0.023438	-53.79109	190.954	611.9159	-0.60352	0.17822	-0.053711
1.158	-2.584	11.2873	25.6833	-0.08584	-0.04375	-0.0052734	-14.17	20.1363	10.9199	0.14455	0.0027283	-0.10653	2.227	49.869	15.7265	0.12402	0.013184	0.013184	2.577	81.937	1064.9	-1.4604	0.72607	-0.26514	-68.157	-244.036	1271.201	-1.7012	0.23242	-0.4082	-11.625	18.5441	10.6036	0.14453	-0.11816	-0.030762	-20.696	158.998	588.6221	-0.58203	0.16162	-0.04248
1.16	-33.948	36.07197	9.83832	-0.084961	-0.020508	0.00048828	9.313	54.993	12.3085	0.13623	0.028809	-0.1123	18.726	22.1799	13.8781	0.12769	-0.005127	0.019531	28.703	149.811	1028.518	-1.398	0.68799	-0.26172	-22.505	-237.337	1313.5478	-1.8223	0.19775	-0.37061	12.851	46.502	30.714	0.13306	-0.097413	-0.038574	-10.348	195.357	547.979	-0.52295	0.12256	-0.03125
1.162	-16.426	-5.061	31.726	-0.079395	-0.0033201	0.00029295	2.001	14.4568	19.553	0.12045	0.053683	-0.11809	28.761	43.965	29.944	0.12646	-0.025391	0.027832	13.085	159.007	981.6323	-1.3398	0.64648	-0.25781	42.672	-213.991	1372.6637	-1.9336	0.23755	-0.36157	-25.7236	26.4699	31.1754	0.12988	-0.078125	-0.04248	-46.28467	150.073	530.765	-0.49658	0.10034	-0.022217
1.164	-11.871	26.1454	36.592	-0.072656	0.013965	-0.0016601	10.824	16.55164	34.8297	0.11021	0.071453	-0.12503	-18.6038	21.8882	11.5187	0.12207	-0.049316	0.036133	14.329	113.455	955.82279	-1.2593	0.59521	-0.25635	28.455	-120.778	1374.835	-2.0566	0.32422	-0.36621	9.538	1	41.9185	0.12988	-0.048828	-0.059082	-3.798	167.458	521.021	-0.46143	0.073242	-0.019531
1.166	-45.8504	33.7116	12.992	-0.061719	0.02373	-0.0008789	5.54	28.349	15.7454	0.098892	0.090598	-0.13048	-12.068	8.1004	26.421	0.1167	-0.053711	0.042969	23.073	191.436	924.325	-1.2222	0.57178	-0.25146	54.07	-114.437	1362.697	-2.1885	0.50195	-0.3916	-7.493	24.7802	16.5162	0.13086	-0.03418	-0.063965	-1.085	180.491	476.094	-0.41748	0.044922	-0.010254
1.168	-15.912	10.3031	29.002	-0.048926	0.033496	-0.006543	-9.653	-4.199	12.3211	0.091201	0.1096	-0.13116	-2.102	55.575	0.1926	0.10938	-0.066895	0.046875	-5.8	161.522	909.8129	-1.1445	0.52539	-0.24414	68.617	-61.803	1356.27	-2.2456	0.6001	-0.41211	-30.926	5.97831	22.0152	0.12646	-0.010254	-0.076172	-5.678	138.164	453.599	-0.396	0.034668	-0.0043945
1.17	-17.516	34.9993	18.5058	-0.032227	0.037109	-0.0053711	23.062	32.136	15.2888	0.083008	0.12451	-0.13916	-10.373	36.2343	17.9228	0.10205	-0.077392	0.056396	1.96	162.446	874.8488	-1.0959	0.4939	-0.24243	65.17663	-49.16	1334.484946	-2.3276	0.77979	-0.44434	20.924	23.231	20.4354	0.12891	0.01123	-0.096191	40.33	184.9934	405.1483	-0.3584	0.01123	-0.0039063
1.172	-43.2343	1.736	17.17771	-0.016895	0.036621	-0.014551	0.942	11.702	12.6515	0.070711	0.1413	-0.1333	22.6	36.768	44.842	0.092285	-0.085938	0.064941	2.196	214.074	824.2577	-1.0444	0.46582	-0.24072	96.9209	-121.392	1369.307	-2.376	0.9038	-0.46924	-12.908	16.75615	-4.544	0.13037	0.022461	-0.10498	7.817	163.0261	370.6895	-0.3252	-0.005371	-0.003418
1.174	-8.776	-3.7563	27.7873	-0.00097654	0.032129	-0.021777	-11.143	-0.1556	28.0619	0.059095	0.15371	-0.13095	-29.814	26.163	-9.6989	0.085449	-0.092285	0.067383	-22.703	137.235	790.976	-0.97998	0.42236	-0.23145	65.268	-103.641	1373.236	-2.4121	1.0156	-0.49365	-3.436	-5.865	3.4991	0.13428	0.043457	-0.10889	19.686	159.36	357.5278	-0.29199	-0.021973	-0.00048828
1.176	-36.503	24.0321	1.309	0.011524	0.025488	-0.026074	-15.714	36.868	34.9332	0.044254	0.16424	-0.13135	-16.707	-5.2395	12.7521	0.088379	-0.094727	0.071777	-25.094	184.425	743.5154	-0.95117	0.4043	-0.22461	4.713	-124.4127	1372.718	-2.4531	1.1289	-0.52344	33.6656	19.264	-1.019	0.13354	0.058105	-0.11328	39.676	185.118	314.2049	-0.25537	-0.041992	-0.0024414
1.178	-19.015	-8.8681	16.0712	0.027442	0.019434	-0.031152	-0.838999999999999	0.948700000000001	38.4023	0.027152	0.17646	-0.12705	32.6249	25.562	22.1405	0.088867	-0.097168	0.081543	-24.93	195.81	708.805	-0.89063	0.36914	-0.21289	-23.392	-135.994	1388.819	-2.4722	1.1743	-0.53467	-29.4444	17.5352	6.26318	0.13721	0.071289	-0.11865	9.588	123.306	305.6086	-0.23389	-0.049805	0.003418
1.18	3.954	19.1369	24.7306	0.039551	0.010254	-0.04541	-1.535	-8.589	71.709	0.0097656	0.19043	-0.12354	-14.845	18.123013	24.5664	0.092041	-0.098388	0.079345	-26.356	159.4859	702.8524	-0.84839	0.34742	-0.20484	-7.009	-71.564	1402.598	-2.4917	1.2271	-0.56348	12.461	16.277	45.9941	0.13818	0.089844	-0.11816	59.7389	116.301	306.4881	-0.20361	-0.064941	0.003418
1.182	-7.95	15.6798	15.4666	0.046582	0.00048832	-0.045801	-2.864	-27.059	84.299	-0.014068	0.19795	-0.11201	0.456	9.6577	48.892	0.097168	-0.099121	0.085449	-30.0859	228.115	682.055	-0.81055	0.32764	-0.19531	43.395	-127.362	1435.8145	-2.4936	1.2446	-0.58911	0.463999999999999	52.032	25.8862	0.1377	0.10059	-0.12305	37.0348	125.467	264.131	-0.18115	-0.076172	-0.00073242
1.184	4.086	-6.69071	29.4421	0.050977	-0.0125	-0.055567	-24.833	-73.109	85.70763	-0.035164	0.21192	-0.10371	-12.397	29.1225	6.332	0.10449	-0.10059	0.090332	-53.083	157.7485	660.71	-0.75146	0.30273	-0.18213	89.596	-119.501	1466.722	-2.4819	1.229	-0.60889	-24.618	13.0175	22.6978	0.13184	0.11328	-0.12305	0.675999999999998	89.5543	262.5687	-0.16406	-0.088867	0.00048828
1.186	10.662	38.409	38.0285	0.057617	-0.019141	-0.061426	-21.963	-44.108	123.009	-0.061334	0.21856	-0.093162	-48.4919	11.04408	12.6793	0.11475	-0.104	0.094238	-35.056	139.3847	635.715	-0.72168	0.29102	-0.18066	76.738	-93.1389	1446.341	-2.4355	1.1807	-0.63086	27.433	18.0032	21.6296	0.12647	0.12671	-0.12426	48.988	130.6829	252.9147	-0.13672	-0.1001	0.00048828
1.188	22.754	-2.3863	57.7902	0.057227	-0.025879	-0.071289	-26.8307	-65.516	162.67673	-0.08389	0.23467	-0.084081	10.524	22.634	34.27	0.12939	-0.11328	0.098145	-14.357	182.403	597.453	-0.66406	0.26709	-0.16846	78.714	-148.75	1471.52	-2.3816	1.1281	-0.64429	-18.159	15.1315	-0.9232	0.11816	0.13818	-0.1167	-8.038	120.2273	227.243	-0.125	-0.104	0.0014648
1.19	28.473	-45.3167	85.711	0.058105	-0.032227	-0.081055	-30.9681	-124.5895	252.117	-0.11328	0.24658	-0.081543	-16.261	26.136	32.5093	0.1394	-0.11938	0.098877	-17.905	106.9152	571.0143	-0.61792	0.2439	-0.16602	103.85341	-54.674	1489.924	-2.3159	1.0688	-0.65625	-5.72	-1.712	18.2761	0.10156	0.16064	-0.11035	2.041	104.4459	223.4091	-0.097656	-0.10889	0.0019531
1.192	14.945	-25.208	56.2861	0.056836	-0.035449	-0.091699	-42.968	-116.348	343.967	-0.13593	0.26162	-0.081738	-29.1495	-7.0097	35.9001	0.1543	-0.12451	0.099121	-17.477	166.94	536.7876	-0.56445	0.22168	-0.15674	114.317	-48.499	1466.8119	-2.2222	0.97607	-0.66748	31.28	27.8483	1.5177	0.092773	0.17139	-0.10352	25.231	119.437	180.7664	-0.077636	-0.11621	0.0036621
1.194	19.583	-62.3435	63.5049	0.055762	-0.035742	-0.10391	-110.188	-152.24577	451.21	-0.16425	0.27275	-0.083983	18.236	10.0371	12.674	0.1709	-0.13672	0.089355	-19.166	166.775	496.1911	-0.50098	0.18262	-0.14795	125.272	-86.709	1462.557	-2.1714	0.93604	-0.67529	-6.193	14.3231	-4.05556	0.071289	0.19385	-0.092285	-27.222	61.2711	159.915	-0.057129	-0.125	0.0073242
1.196	43.031	-36.8631	126.44837	0.054981	-0.036524	-0.11406	-129.124	-110.589	567.691	-0.19785	0.29189	-0.089063	-37.63916	3.6923	-2.5361	0.17969	-0.14258	0.08252	3.411	124.131	480.1987	-0.47461	0.15967	-0.146	74.513	-16.379	1411.437	-2.0913	0.85205	-0.67529	3.313	5.7436	9.5681	0.055176	0.21386	-0.085449	-5.468	56.6853	159.817	-0.035156	-0.12988	0.0043945
1.198	44.155	-18.511	159.7538	0.053906	-0.04209	-0.12793	-130.0812	-69.619	649.066	-0.23877	0.30752	-0.104	-7.077	-0.559399999999999	25.515	0.19336	-0.15234	0.072266	16.293	188.206	456.865	-0.41992	0.12354	-0.13525	34.776	-63.2581	1391.83	-2.0407	0.80395	-0.68311	6.251	19.2457	0.7403	0.035156	0.23145	-0.069824	-27.071	77.292	127.1373	-0.020508	-0.13965	0.0048828
1.2	61.088	-50.544	214.849	0.055664	-0.04248	-0.14404	-152.572	-83.5129	696.538	-0.28906	0.32764	-0.10791	28.35	22.7895	11.2837	0.19849	-0.16259	0.063232	6.701	138.2349	427.238	-0.38379	0.096922	-0.12793	23.836	0.8931	1401.851	-2.0029	0.76953	-0.68848	-17.931	3.9916	21.1005	0.011719	0.26025	-0.0625	-41.102	60.808	128.147	0.0024414	-0.15039	0.0073242
1.202	43.832	-8.5732	245.741	0.043164	-0.040918	-0.16748	-127.657	-55.4258	730.831	-0.35225	0.34619	-0.12451	-24.198	11.6514	-2.2004	0.20654	-0.17383	0.05957	22.708	146.31218	406.8339	-0.35303	0.07373	-0.11719	-7.496	90.678	1388	-1.957	0.73828	-0.69727	18.03	16.8377	47.15751	-0.00097656	0.2749	-0.056641	-1.847	94.299	111.3939	0.023193	-0.15771	0.0075683
1.204	35.83	17.1831	326.322	0.025	-0.035352	-0.179	-86.422	-60.357	753.715	-0.4249	0.36709	-0.1456	6.341	20.0673	9.6154	0.21387	-0.18262	0.036133	16.446	192.383	361.8833	-0.31348	0.05127	-0.10889	19.311	41.31	1422.2006	-1.9375	0.73242	-0.69922	-25.1549	10.596	43.754	-0.01709	0.30811	-0.046387	-54.9743	74.814	82.9377	0.040039	-0.16455	0.0019531
1.206	53.434	63.834	490.0595	-0.0046876	-0.027539	-0.18877	-43.1976	-77.736	798.665	-0.51084	0.3874	-0.15537	-2.443	37.332	3.04673	0.21777	-0.18848	0.02832	13.183	129.8326	342.3842	-0.29932	0.041992	-0.10498	34.361	87.0491	1407.332	-1.9102	0.71875	-0.70117	-20.997	-40.362	67.2451	-0.03125	0.33252	-0.046143	-35.922	80.056	99.78642	0.066895	-0.17822	-0.0043945
1.208	23.097	131.979	581.916	-0.05918	-0.016309	-0.19795	-17.059	-33.7274	784.328	-0.61631	0.40811	-0.17061	-1.253	14.0022	32.1868	0.21729	-0.19482	0.0097656	38.163	169.087	321.9554	-0.25781	0.022461	-0.10156	9.59	36.256	1360.0008	-1.8903	0.71216	-0.70581	13.027	-38.14	83.861	-0.043945	0.35352	-0.044434	-20.543	100.821	57.5046	0.080566	-0.18311	-0.00048828
1.21	44.369	81.7185	698.001	-0.13574	-0.010742	-0.20264	-26.221	-31.957	766.477	-0.74219	0.4375	-0.18164	24.01	17.8774	25.3333	0.22193	-0.19897	-0.0041504	41.3559	152.458	294.3325	-0.22925	0.0087889	-0.10083	30.402	-6.251	1355.5763	-1.877	0.71289	-0.70605	-36.2394	-40.47	113.2815	-0.04541	0.38281	-0.049316	-39.5601	64.676	59.85263	0.099609	-0.19043	0.00048828
1.212	31.237	54.337	738.422	-0.22393	-0.00029308	-0.20479	4.164	-3.807	774.145	-0.88653	0.46855	-0.18379	-21.79	1.0491	-3.462	0.22119	-0.19873	-0.016602	47.065	107.9371	294.5124	-0.20313	-0.0048828	-0.099609	37.17	95.953	1353.2457	-1.8672	0.71875	-0.69922	-19.372	-44.522	223.6983	-0.05127	0.39844	-0.049805	0.0230000000000032	72.358	53.6613	0.11524	-0.20044	-0.0053711
1.214	6.86799999999999	6.762	826.609	-0.33125	0.013965	-0.20381	31.177	40.3877	747.5003	-1.0391	0.50313	-0.17031	11.992	-10.1039	15.7247	0.22559	-0.18506	-0.040039	45.091	168.588	266.0324	-0.16895	-0.022461	-0.096191	69.867	54.904	1368.6142	-1.8672	0.72266	-0.69824	-25.1452	-30.36	309.885	-0.068848	0.4248	-0.072754	-46.27	68.637	26.9773	0.12744	-0.20605	-0.012695
1.216	12.859	-100.164	942.908	-0.45508	0.031933	-0.19795	54.58547	-6.612	741.711	-1.2156	0.5375	-0.15508	12.893	20.0401	4.7795	0.22827	-0.17505	-0.055176	16.849	130.344	241.2926	-0.15186	-0.030762	-0.086426	61.356	54.563	1381.6053	-1.8652	0.7334	-0.68066	-82.837	-79.855	416.256	-0.086669	0.44385	-0.087158	-34.569	35.858	37.7967	0.14111	-0.21045	-0.016602
1.218	23.088	-99.591	980.008	-0.59023	0.053515	-0.19141	48.689	-25.5412	746.046	-1.4225	0.57158	-0.14658	-20.939	8.4779	10.8994	0.22998	-0.15967	-0.066895	14.864	132.747	243.0923	-0.12891	-0.055664	-0.07666	44.402	58.889	1349.1506	-1.8553	0.73657	-0.67017	-86.394	-87.0073	543.471	-0.11279	0.46436	-0.10938	22.967	61.694	31.3269	0.14746	-0.2124	-0.020508
1.22	42.937	-113.781	967.425	-0.74365	0.074707	-0.17676	2.685	-42.137	751.871	-1.6558	0.61963	-0.146	33.732	12.5185	9.6637	0.229	-0.13379	-0.086426	22.523	152.002	215.7877	-0.11621	-0.069824	-0.074951	50.526	-43.011	1349.816	-1.8413	0.74072	-0.66455	-149.73	-68.9517	614.385	-0.1748	0.48828	-0.12988	-8.175	50.364	28.8677	0.1582	-0.21387	-0.025879
1.222	26.518	-158.033	919.671	-0.91221	0.11455	-0.14736	-3.41	-79.135	803.39	-1.8659	0.66865	-0.16025	1.683	29.6359	-17.9225	0.22314	-0.12061	-0.091797	18.63	64.23	219.8277	-0.1084	-0.085938	-0.072754	59.152	42.9988	1342.374	-1.8159	0.73682	-0.64893	-139.371	-77.5584	677.5099	-0.21582	0.5	-0.15918	15.807	36.263	45.0548	0.16016	-0.21338	-0.029785
1.224	12.1813	-168.08	904.925	-1.0935	0.1625	-0.10996	25.445	-44.82	852.1163	-2.0359	0.72344	-0.17998	-12.476	11.646	1.968	0.22168	-0.09375	-0.1084	8.487	101.102	200.861	-0.096191	-0.099609	-0.072266	36	51.164	1336.37	-1.7949	0.72656	-0.6416	-118.856	-15.982	722.828	-0.33496	0.51953	-0.19238	26.313	60.264	33.10626	0.15918	-0.21289	-0.02832
1.226	-10.626	-205.716	925.9095	-1.2853	0.21641	-0.054097	13.1895	-77.478	850.765	-2.1625	0.78906	-0.20732	20.286	33.08	8.7134	0.21826	-0.070801	-0.11621	-9.7306	91.7672	176.828	-0.092773	-0.10547	-0.05957	32.309	21.542	1292.018	-1.7651	0.70947	-0.62646	-113.492	-14.73	740.689	-0.44262	0.53247	-0.20776	3.226	12.6598	9.933	0.1582	-0.20313	-0.026855
1.228	-12.2324	-184.091	964.7361	-1.5129	0.28458	0.0047887	50.2262	-138.95	863.461	-2.2151	0.85713	-0.22393	-46.570702	31.475	-12.0574	0.21484	-0.044922	-0.1333	-22.485	59.1669	180.199	-0.083984	-0.11279	-0.059082	18.884	72.37	1227.42	-1.7458	0.69262	-0.61377	-33.5609	-33.052	820.774	-0.56787	0.54541	-0.2124	39.5787	14.3069	28.397	0.15771	-0.2002	-0.025391
1.23	-31.9337	-133.251	991.3705	-1.7935	0.37939	0.058105	95.319	-162.1965	853.214	-2.209	0.93164	-0.23242	-2.952	16.5188	10.793	0.20508	-0.015137	-0.14209	-23.569	113.749	144.7693	-0.078125	-0.11377	-0.053223	2.976	-10.06	1184.381	-1.7163	0.68115	-0.59717	-25.354	-23.1097	816.447	-0.76758	0.57227	-0.19434	37.295	22.7521	-1.0919	0.14746	-0.18896	-0.032227
1.232	-51.027	-144.317	1047.637	-2.1155	0.50907	0.090429	71.5493	-231.181	902.807	-2.1493	1.0038	-0.24307	20.38	38.814	20.95	0.19971	-0.0053711	-0.14258	-23.266	70.245	130.3707	-0.072266	-0.11719	-0.053711	43.857	33.142	1170.3331	-1.6772	0.66846	-0.57959	-51.659	-14.8202	836.198	-0.88135	0.58447	-0.18311	14.825	-3.75473	4.37014	0.13525	-0.17676	-0.018555
1.234	-101.267	-120.5518	1084.947	-2.4689	0.67115	0.079599	86.7849	-256.57	993.5768	-2.0582	1.0582	-0.26132	-35.04788	16.2783	5.8134	0.1875	0.032715	-0.15332	-27.799	70.037	120.89519	-0.063965	-0.1167	-0.048828	58.43	102.951	1141.702	-1.6523	0.65918	-0.57324	11.529	0.952999999999999	873.141	-1.1309	0.60352	-0.15332	66.1772	36.328	13.9988	0.12695	-0.16992	-0.019043
1.236	-112.677	-126.404	1069.24	-2.7881	0.85161	0.037806	64.0151	-264.477	1006.658	-1.9484	1.0907	-0.28711	1.944	22.9564	23.4871	0.17798	0.053711	-0.15015	-19.843	95.181	98.678	-0.053223	-0.1145	-0.046631	70.6629	67.433	1140.202	-1.6011	0.65186	-0.55322	-23.475	37.199	823.1135	-1.3427	0.61914	-0.14355	5.88	27.781	-11.1397	0.10986	-0.15283	-0.0097656
1.238	-24.886	-151.52	1093.8076	-2.9801	1.0377	0.0043027	27.333	-336.873	1031.901	-1.8389	1.0839	-0.31416	-30.319	56.57	-16.8337	0.17041	0.077148	-0.15332	-29.195	34.3776	114.795	-0.047852	-0.11572	-0.046875	75.0062	159.158	1114.263	-1.5562	0.63721	-0.53076	-0.720000000000002	-10.692	812.177	-1.5762	0.64258	-0.14063	-5.72	33.203	26.5525	0.097902	-0.13892	-0.0031738
1.24	0.255000000000003	-77.26	1124.006	-3.0073	1.1958	-0.01709	37.48	-327.512	1063.495	-1.7363	1.0449	-0.32373	-20.223	35.597	13.66141	0.15332	0.10742	-0.15234	-31.683	80.385	89.8828	-0.039063	-0.10791	-0.040527	60.12369	129.939	1086.952	-1.5166	0.625	-0.51465	59.254	-45.637	797.1542	-1.8706	0.71289	-0.14648	26.276	59.648	18.0619	0.086426	-0.13184	0.0024414
1.242	9.632	-78.01	1150.577	-2.8474	1.3208	-0.02774	-32.631	-317.353	1101.95	-1.6573	0.95225	-0.32832	14.4	45.274	30.779	0.14551	0.12207	-0.15479	-33.2721	69.572	67.4325	-0.030273	-0.10889	-0.040527	71.1391	88.4163	1067.6321	-1.4624	0.61182	-0.49365	3.322	-92.439	825.3132	-1.9956	0.75244	-0.14941	0.760999999999999	27.252	14.743	0.070313	-0.11328	0.0068359
1.244	23.944	-116.584	1171.5444	-2.5938	1.4119	-0.052494	-45.714	-279.65	1177.6602	-1.6012	0.83399	-0.32168	-25.4424	22.2802	3.0847	0.1333	0.15039	-0.14941	-36.938	34.1262	65.067	-0.02002	-0.10742	-0.036133	83.0071	141.236	1037.785	-1.438	0.60449	-0.48193	-7.956	-135.234	916.932	-2.2144	0.85693	-0.16992	18.321	35.183	18.743	0.0625	-0.10498	0.012207
1.246	-16.149	-154.546	1161.889	-2.3188	1.4658	-0.11814	-21.9942	-163.264	1198.006	-1.5793	0.71211	-0.31973	2.398	-16.9959	23.41	0.1206	0.17041	-0.14014	-18.479	84.753	39.1654	-0.01001	-0.10424	-0.03833	67.406	75.793	1011.6857	-1.3887	0.59766	-0.45605	-13.233	-87.92	929.9229	-2.3083	0.95434	-0.18238	-10.782	41.433	-5.50473	0.04834	-0.087402	0.018555
1.248	-10.1566	-279.004	1214.892	-2.0856	1.4529	-0.18854	-57.509	-134.233	1207.265	-1.5796	0.60556	-0.30254	6.106	18.6706	15.3142	0.10742	0.18652	-0.13281	-23.623	41.7037	25.4197	0.0014648	-0.097656	-0.041016	27.02	89.971	991.208	-1.3438	0.59229	-0.43799	12.371	-103.154	941.7	-2.353	1.061	-0.21045	-29.112	4.3738	10.47233	0.039063	-0.081299	0.024414
1.25	-5.987	-300.942	1297.989	-1.918	1.3594	-0.24805	-55.6445	-103.262	1243.3028	-1.5952	0.52197	-0.29834	-26.6039	8.429	20.7354	0.092773	0.20801	-0.12207	-9.797	47.005	43.12582	0.016113	-0.098145	-0.038086	-19.099	108.577	941.302	-1.3062	0.58643	-0.42383	77.3048	-154.949	945.785	-2.3218	1.1919	-0.22607	-4.749	31.4713	16.4265	0.029297	-0.075195	0.02002
1.252	-49.8649	-285.172	1344.16	-1.8211	1.1575	-0.26806	-67.829	-57.953	1238.768	-1.6378	0.46416	-0.29776	14.997	26.7978	27.214	0.081543	0.21631	-0.11279	-5.623	65.818	37.3694	0.023926	-0.094238	-0.033203	-22.453	33.688	907.61665	-1.2539	0.57422	-0.4043	58.9861	-180.11	943.409	-2.2769	1.2417	-0.24121	-29.611	31.2492	14.7464	0.021973	-0.0625	0.022949
1.254	-94.52	-312.319	1378.877	-1.7657	0.88225	-0.25888	-63.45833	-86.828	1289.054	-1.6838	0.43447	-0.30254	1.456	49.165	3.7529	0.063965	0.23096	-0.093262	-3.687	10.3265	37.8696	0.037598	-0.09375	-0.031738	11.84	98.792	882.114	-1.2285	0.56445	-0.39453	88.851	-242.02	987.819	-2.1538	1.3208	-0.26709	-10.793	17.5805	34.423	0.018555	-0.058105	0.024902
1.256	-119.247	-268.705	1369.796	-1.7343	0.60278	-0.22574	-22.549	-70.164	1346.443	-1.7405	0.4333	-0.31269	-12.016	20.93001	26.0508	0.054932	0.24609	-0.083985	20.028	32.476	34.744	0.044434	-0.091553	-0.030762	9.274	81.006	850.017	-1.1792	0.55029	-0.37256	126.564	-254.846	1048.8922	-2.0479	1.335	-0.29443	-19.996	31.745	16.624	0.0024414	-0.047852	0.023438
1.258	-91.398	-260.181	1394.791	-1.725	0.36064	-0.19773	-51.8175	-80.327	1346.12406	-1.8092	0.4709	-0.32617	17.494	29.1944	30.86	0.046875	0.2583	-0.070801	29.629	3.65574	13.4063	0.044434	-0.092773	-0.032227	0.863999999999997	73.838	832.872	-1.1423	0.54272	-0.35473	49.612	-258.461	1090.106	-1.9414	1.3008	-0.32715	-60.1055	-2.6082	30.5034	-0.0073242	-0.045166	0.019531
1.26	-28.676	-245.149	1460.1363	-1.7441	0.16797	-0.18311	-49.1474	-137.1	1403.71068	-1.8784	0.53223	-0.34424	-15.53	24.585	29.205	0.039063	0.2627	-0.057617	11.964	-17.4599	17.4883	0.051758	-0.094727	-0.024414	-1.008	169.187	801.3355	-1.1099	0.53857	-0.3335	35.876	-329.563	1159.867	-1.8198	1.1763	-0.36182	-8.775	5.07312	36.3863	-0.016602	-0.035156	0.01709
1.262	15.844	-142.455	1483.19161	-1.7881	0.031055	-0.16609	-33.9939	-124.71	1444.5145	-1.9482	0.61035	-0.36563	10.944	16.8824	42.126	0.03418	0.26953	-0.049316	40.7033	35.079	4.3761	0.054199	-0.095703	-0.020508	-9.228	128.517	784.2955	-1.0625	0.52734	-0.31641	9.3	-325.69	1176.716	-1.7695	1.0879	-0.375	-49.7905	13.7158	11.3745	-0.035645	-0.030273	0.02002
1.264	37.4586	-138.9699	1485.9793	-1.8418	-0.051909	-0.13759	-84.414	-148.90457	1451.417	-2.0148	0.69336	-0.38828	8.835	35.351	20.0622	0.025879	0.27539	-0.03125	32.6397	1.53975	-2.6277	0.057129	-0.095703	-0.013672	17.172	161.357	761.187	-1.0386	0.52197	-0.3042	-27.6118	-309.296	1206.188	-1.7046	0.90283	-0.37061	-52.7815	-12.8105	24.37249	-0.050781	-0.026855	0.016602
1.266	63.7597513	-86.42	1487.529	-1.9197	-0.072239	-0.10709	-46.766	-155.9988	1504.875	-2.0832	0.76797	-0.40508	-21.067	1.1561	13.0594	0.016602	0.27856	-0.020997	27.328	11.3432	7.90497	0.056397	-0.094726	-0.0036621	18.634	199.231	730.7786	-0.98975	0.51221	-0.28271	10.9099	-282.352	1261.914	-1.6871	0.77588	-0.36963	1.818	10.8979	26.7469	-0.072754	-0.021484	0.018066
1.268	89.622	-30.979	1453.362	-2.0195	-0.021764	-0.07802	-40.735	-124.4342	1514.141	-2.1555	0.83907	-0.42304	38.229	-6.1865	24.4999	0.0087891	0.28223	-0.015137	16.94	22.4546	-4.7291	0.054199	-0.10449	-0.00097656	6.808	144.5739	701.887	-0.95434	0.50268	-0.26782	-34.791	-169.59778	1246.756	-1.6929	0.65723	-0.37646	-44.7978	10.152	1.655	-0.093018	-0.019287	0.016845
1.27	96.43107	-80.65	1459.9119	-2.1284	0.10303	-0.069824	-49.93	-164.204	1533.237	-2.2285	0.9043	-0.43945	-0.265999999999998	32.86	-0.25993	-0.00097656	0.2832	-0.0029297	10.253	-22.7464	6.9688	0.053223	-0.10156	0.0092773	-28.921	226.476	648.7301	-0.91748	0.48877	-0.25488	-54.323	-129.424	1269.013	-1.7207	0.55859	-0.37549	-9.961	12.9056	19.9458	-0.11475	-0.016113	0.02002
1.272	96.9955	-27.054	1467.92	-2.2409	0.2741	-0.074685	33.272	-161.694	1574.402	-2.3051	0.97188	-0.45254	-11.916	-4.02	47.8763	-0.010742	0.28369	0.00097656	16.742	37.068	12.7828	0.05127	-0.10547	0.01709	-57.6285	197.9457	617.513	-0.85498	0.4751	-0.23486	-20.8473	-93.299	1295.7052	-1.7476	0.521	-0.37158	21.405	47.115	9.0709	-0.12939	-0.011719	0.020996
1.274	16.827	-58.181	1486.926	-2.3364	0.46233	-0.083041	12.0405	-136.853	1549.374	-2.3855	1.0352	-0.46748	39.585	-9.6897	90.2928	-0.026367	0.28174	0.0058594	17.714	34.599	-7.5817	0.054199	-0.1084	0.026855	-49.8496	170.761	599.46	-0.82617	0.46094	-0.22705	-48.82	-50.518	1288.8706	-1.8218	0.50439	-0.36475	-20.965	19.5396	14.6586	-0.13965	-0.0083008	0.023926
1.276	-45.4958	-111.545	1525.682	-2.4269	0.65665	-0.092965	23.5381	-154.411	1594.421	-2.448	1.0947	-0.48467	-31.31811	-39.769	110.3403	-0.043213	0.27613	0.00024415	-1.066	20.184	13.4875	0.054443	-0.11084	0.034424	-39.0686	216.737	571.49	-0.76563	0.43945	-0.21777	-20.163	-103.054	1369.479	-1.8855	0.52758	-0.37061	30.239	16.0069	17.5642	-0.15186	-0.003418	0.023438
1.278	-36.8279	-70.161	1525.551	-2.4984	0.82621	-0.10818	52.0782	-67.2729	1590.11	-2.4995	1.1409	-0.49883	-3.511	-92.076	165.9339	-0.060547	0.271	-0.0073242	-21.747	49.804	1.34435	0.056641	-0.11426	0.040527	-6.018	128.9155	550.7704	-0.71777	0.4209	-0.20703	-8.283	-85.115	1407.256	-1.9531	0.5791	-0.37939	15.268	24.1964	-9.3217	-0.1521	-0.00024415	0.026123
1.28	-2.41	-123.139	1528.665	-2.5586	0.97461	-0.13574	0.101999999999999	-23.151	1510.779	-2.5313	1.1797	-0.50977	-17.4565	-77.999	212.2314	-0.094238	0.26318	-0.018066	-11.528	19.3558	3.8449	0.056641	-0.1167	0.050293	-15.955	139.9917	516.2078	-0.67139	0.3999	-0.19678	-63.2261	-85.786	1407.526	-2.0444	0.68604	-0.40771	-15.06	-12.62326	2.154	-0.1543	0.0063477	0.030273
1.282	59.008	-109.354	1554.467	-2.5915	1.0801	-0.16684	21.0316	-10.449	1498.794	-2.5515	1.2067	-0.51748	-75.004	-121.723	297.27228	-0.12109	0.26123	-0.030273	-3.585	27.7404	2.172	0.059082	-0.11865	0.051758	-28.7713	171.483	488.433	-0.61279	0.37598	-0.18848	-19.0353	-127.95	1421.478	-2.0854	0.74951	-0.42432	48.9897	10.3709	7.10522	-0.14404	0.015625	0.026855
1.284	73.108	-75.559	1544.697	-2.6027	1.1344	-0.21439	51.9111	39.5223	1482.1619	-2.5719	1.2152	-0.52422	-39.825	-155.8716	393.551	-0.18457	0.25684	-0.04834	-21.8586	48.58	-4.4528	0.063477	-0.12451	0.056641	3.748	130.915	489.5489	-0.58691	0.36426	-0.18262	-42.9943	-87.584	1400.605	-2.1577	0.85791	-0.45264	18.149	7.7086	-1.506	-0.13574	0.020508	0.025391
1.286	64.343	-145.005	1554.816	-2.6027	1.136	-0.26513	14.457	14.2436	1494.725	-2.5934	1.2281	-0.52305	-107.707	-144.8628	438.539	-0.24536	0.25903	-0.070556	-31.407	11.14195	7.4843	0.064453	-0.1272	0.062012	26.711	202.226	474.6807	-0.53125	0.34033	-0.17676	-77.1793	-131.8417	1429.037	-2.2097	0.93481	-0.46362	24.416	3.766	11.2068	-0.1167	0.024902	0.022949
1.288	67.858	-95.417	1581.118	-2.5889	1.101	-0.31314	57.6804	25.618	1526.81599	-2.6232	1.2369	-0.51719	-146.725	-148.53864	485.327	-0.32373	0.2583	-0.086426	-28.391	36.454	19.8979	0.068848	-0.13086	0.063477	30.8611	161.272	471.9693	-0.49121	0.32691	-0.16407	-24.878	-151.8458	1469.705	-2.2598	0.99512	-0.47656	36.6791	31.369	0.947000000000001	-0.095702	0.026123	0.019043
1.29	87.463	-89.2437	1561.618	-2.562	1.0464	-0.34375	25.6778	60.359	1467.857	-2.6558	1.2603	-0.51221	-106.5667	-115.5107	495.9932	-0.44531	0.26514	-0.10547	-28.3879	24.4628	10.3145	0.072266	-0.14502	0.064453	19.576	124.552	452.232	-0.45508	0.31006	-0.15869	-53.483	-114.797	1474.29	-2.3213	1.0645	-0.49023	3.645	5.0481	-0.7177	-0.076172	0.027832	0.018555
1.292	86.043	-132.1928	1577.938	-2.5259	0.99072	-0.36722	-0.863999999999999	-2.9732	1492.402	-2.6887	1.2801	-0.50078	-120.474	-84.1709	504.046	-0.52002	0.26514	-0.1084	-15.95	-5.0814	19.5496	0.071777	-0.146	0.063477	7.103	172.489	423.671	-0.40723	0.29004	-0.15332	-29.1486	-166.63	1526.732	-2.3472	1.0884	-0.49365	32.768	10.0784	10.8087	-0.049805	0.030762	0.015137
1.294	70.0763	-53.327	1531.796	-2.4883	0.93053	-0.38503	20.7836	22.152	1496.2461	-2.7098	1.3015	-0.49033	-81.131	-76.9415	554.162	-0.68018	0.27148	-0.12158	-28.331	30.5433	24.081	0.073242	-0.1626	0.058594	-12.5757	134.1016	408.575	-0.38281	0.27734	-0.15283	-0.00399999999999956	-149.905	1551.254	-2.3979	1.1333	-0.49658	21.508	14.1207	4.358	-0.033691	0.023438	0.015137
1.296	3.04799999999999	-66.424	1495.333	-2.4554	0.88148	-0.40127	-26.572	21.0438	1475.796	-2.718	1.3137	-0.48682	-36.0472	-34.951	592.392	-0.82422	0.2832	-0.1211	-49.3195	6.8799	21.7833	0.074463	-0.17334	0.054688	-10.846	158.611	389.233	-0.34033	0.25879	-0.14746	-22.6686	-119.918	1537.033	-2.4294	1.1477	-0.50781	-2.231	-5.4946	2.551	-0.0092773	0.01416	0.010742
1.298	-25.93	-17.229	1495.0111	-2.408	0.83383	-0.41802	8.663	3.5985	1504.4147	-2.7125	1.3312	-0.46953	-45.982	-29.5427	620.336	-0.97607	0.30322	-0.11768	-23.446	24.777	32.7851	0.073242	-0.18408	0.046875	-19.0343	165.736	329.298	-0.31201	0.23706	-0.14233	26.9121	-131.699	1556.317	-2.4604	1.1646	-0.50732	9.395	19.2606	3.2551	0.010742	0.009033	0.0051269
1.3	-40.657	85.294	1443.124	-2.3574	0.79492	-0.43262	3.698	56.465	1513.0934	-2.7007	1.3403	-0.45557	-3.18299999999999	-13.9133	659.772	-1.1694	0.31934	-0.10596	-31.053	53.905	5.822	0.068848	-0.19971	0.037598	-17.412	85.525	305.2978	-0.29395	0.22461	-0.12891	38.583	-31.913	1492.263	-2.5015	1.1763	-0.49365	-18.7027	21.8815	-10.6292	0.02832	-0.0024414	-0.00097656
1.302	-30.495	40.8471	1454.996	-2.3066	0.76628	-0.4368	-71.978	14.0028	1522.9266	-2.6898	1.343	-0.44248	-35.712	26.2394	655.68695	-1.2632	0.33643	-0.10596	-23.732	4.29787	18.0997	0.068359	-0.20166	0.036621	-29.9152	128.23538	255.6175	-0.27246	0.20605	-0.125	2.112	-18.587	1440.5977	-2.519	1.1821	-0.48779	5.022	25.7079	9.1928	0.04834	-0.015625	-0.0029297
1.304	12.337	69.3024	1477.5243	-2.2578	0.74486	-0.44167	-39.352	18.2949	1524.892	-2.6782	1.3457	-0.42168	-24.978	5.0024	688.685	-1.4487	0.35742	-0.10742	1.492	28.983	23.7678	0.05957	-0.21289	0.025391	-27.8606	106.5807	251.865	-0.2666	0.19775	-0.11621	20.444	-28.838	1439.154	-2.5586	1.1924	-0.48193	-3.04	57.564	3.349	0.060547	-0.026367	-0.01709
1.306	-7.32	53.825	1440.6342	-2.2253	0.725	-0.4463	-85.029	60.563	1486.893	-2.6676	1.3422	-0.40684	40.925	-6.7659	705.41	-1.5991	0.40234	-0.12451	-4.063	22.7416	18.9838	0.053711	-0.21582	0.020263	-4.483	96.137	262.614	-0.24902	0.19141	-0.10986	0.350000000000001	26.741	1421.574	-2.5779	1.1985	-0.4773	-45.4811	32.9057	-3.2382	0.075195	-0.034668	-0.020996
1.308	-11.766	-3.533	1438.517	-2.1948	0.71003	-0.44449	-67.64	14.0727	1486.569	-2.6483	1.3329	-0.3874	-2.638	-23.436	719.907	-1.7383	0.45557	-0.146	0.707000000000001	7.0717	22.561	0.042969	-0.22021	0.012695	1.582	142.653	246.024	-0.23706	0.19482	-0.10596	5.0958	-30.832	1489.096	-2.5879	1.2041	-0.46777	-5.25	41.131	8.9567	0.088868	-0.044434	-0.028809
1.31	21.966	93.383	1403.705	-2.1836	0.69531	-0.43848	-25.131	67.457	1466.151	-2.627	1.3086	-0.37109	18.857	-85.655	823.1802	-1.9077	0.56104	-0.17627	22.8368	51.902	7.4804	0.026367	-0.21777	0.0083008	-1.364	85.691	233.0349	-0.22705	0.19385	-0.099121	33.3668	-0.6169	1489.254	-2.5938	1.2109	-0.45703	-51.9882	46.923	-4.7153	0.10498	-0.054199	-0.039063
1.312	25.661	60.727	1384.243	-2.1743	0.68248	-0.42995	-97.924	75.8821	1401.0516	-2.5985	1.2734	-0.35547	3.059	-90.012	873.1313	-1.9722	0.62256	-0.18701	13.902	10.6853	17.6055	0.01709	-0.21582	0.0053711	-13.954	103.618	197.0971	-0.21436	0.19287	-0.09375	3.02588	44.08	1430.7963	-2.5938	1.2109	-0.45215	-54.76085	11.89151	10.3604	0.11865	-0.061523	-0.04834
1.314	61.566	47.212	1414.999	-2.1664	0.67682	-0.41675	-75.066	78.983	1394.7777	-2.5714	1.2274	-0.34034	-23.164	-103.978	887.689	-2.0527	0.74414	-0.20068	18.844	20.983	11.195	0.0014648	-0.20898	0	-37.5943	118.327	185.079	-0.20605	0.19141	-0.086426	28.01032	-0.437000000000001	1416.417	-2.5796	1.2212	-0.44238	-2.781	22.8573	20.9872	0.12598	-0.067871	-0.056152
1.316	51.522	58.345	1390.1057	-2.1645	0.66705	-0.40584	-51.772	163.746	1368.9788	-2.5382	1.1872	-0.32549	80.1139	-151.908	910.7859	-2.0749	0.83228	-0.2124	40.604	41.366	2.4007	-0.014648	-0.19995	0.0024414	-14.631	75.6008	192.524	-0.19092	0.19238	-0.078125	-4.588	68.34	1377.762	-2.5557	1.2246	-0.42773	-44.7179	15.8627	5.1333	0.13477	-0.074707	-0.064941
1.318	16.722	-35.4399	1394.87325	-2.1541	0.65916	-0.39196	-87.631	137.052	1369.5089	-2.5084	1.1541	-0.31055	102.246	-149.6547	893.597	-2.0601	0.91455	-0.22217	19.835	-0.519	12.5107	-0.028809	-0.18701	-0.0039063	-23.407	119.58	165.0396	-0.17969	0.19214	-0.071777	-40.368	21.6109	1393.242	-2.5469	1.2295	-0.4165	-21.38	10.209	28.1898	0.13355	-0.077881	-0.074463
1.32	55.1678	11.5342	1412.533	-2.1406	0.64844	-0.37891	-23.9372	150.385	1378.209	-2.4805	1.1211	-0.29736	92.3483	-207.421	951.2574	-1.9951	0.98633	-0.23291	30.5	30.329	27.009	-0.048828	-0.16943	0.0073242	-48.8177	67.0975	144.6929	-0.16992	0.19531	-0.064453	-9.066	-28.8251	1442.982	-2.5195	1.2334	-0.40723	-5.099	26.5389	45.386	0.13232	-0.084961	-0.086914
1.322	36.355	46.451	1373.034	-2.1245	0.63956	-0.36867	-41.2187	163.261	1317.3653	-2.4489	1.0999	-0.28018	107.05	-235.78	1011.038	-1.9448	1.0083	-0.23486	5.59	6.4091	38.3044	-0.054688	-0.15869	0.0058594	-39.7677	25.196	122.303	-0.15674	0.19287	-0.052246	-30.2899	7.341	1431.939	-2.4966	1.2222	-0.39453	-45.8563	-7.714	54.0542	0.11377	-0.083496	-0.10498
1.324	45.674	26.96	1340.473	-2.1117	0.62911	-0.35724	-22.4851	104.353	1305.8463	-2.4144	1.0803	-0.275	48.934	-210.779	1025.467	-1.8145	1	-0.23877	13.069	-17.8161	20.0785	-0.071289	-0.13428	0.011719	-41.2771	49.39402	95.091	-0.14795	0.18701	-0.039063	-36.6597	-65.384	1463.72	-2.4727	1.209	-0.37793	-15.549	-18.659	73.942	0.10254	-0.080566	-0.1084
1.326	61.69	97.686	1281.097	-2.1008	0.61428	-0.34552	16.8112	152.347	1301.186	-2.3675	1.0607	-0.27305	38.061	-241.261	1113.124	-1.7087	0.95825	-0.24463	25.527	25.3672	12.2723	-0.078613	-0.11011	0.01294	-30.453	5.459	103.651	-0.12842	0.18555	-0.037109	-19.4914	-17.5278	1460.79	-2.4448	1.1724	-0.35449	-4.421	-13.95	55.3951	0.061035	-0.074707	-0.11768
1.328	16.015	36.501	1224.391	-2.0882	0.5958	-0.33067	-50.9809	140.75	1267.2926	-2.3092	1.0389	-0.26797	35.992	-243.483	1155.806	-1.6147	0.89111	-0.24951	14.057	-10.0403	13.0934	-0.084473	-0.09082	0.020996	-21.574	42.1695	90.1539	-0.11523	0.18286	-0.029296	-84.631	66.976	1404.8884	-2.4253	1.145	-0.34229	-13.26	-58.989	102.0515	0.014648	-0.067871	-0.11621
1.33	32.014	34.677	1226.626	-2.0796	0.57861	-0.3208	1.926	108.277	1271.546	-2.2451	1.0195	-0.26514	-8.058	-232.52999	1167.859	-1.5229	0.77197	-0.24902	-7.542	5.86755	13.0843	-0.089355	-0.0625	0.019043	-7.948	61.365	57.108	-0.1001	0.17773	-0.019043	-36.0361	34.976	1387.5076	-2.3984	1.0898	-0.31836	18.326	-70.058	121.0485	-0.046387	-0.055176	-0.125
1.332	63.7959	105.316	1200.498	-2.069	0.56572	-0.3168	40.726	141.7282	1245.834	-2.174	0.99679	-0.26055	29.563	-221.342	1187.916	-1.4941	0.7168	-0.25195	-3.945	35.348	3.8184	-0.088379	-0.056152	0.017578	5.093	13.429	52.469	-0.075684	0.16699	-0.018066	-62.6989	99.355	1330.07345	-2.3855	1.0501	-0.30274	23.385	-59.136	144.4794	-0.13232	-0.038574	-0.12158
1.334	58.7889	73.411	1162.87	-2.0469	0.55703	-0.31494	-2.083	90.0872	1200.1029	-2.1038	0.96983	-0.25576	14.2863	-117.689	1172.3698	-1.4824	0.62598	-0.24463	5.033	1.5812	2.0119	-0.089844	-0.02832	0.016113	11.708	53.167	23.0675	-0.057373	0.15918	-0.013427	-97.76	48.0362	1320.8585	-2.3672	1.0137	-0.2832	25.057	-69.2617	201.08	-0.18213	-0.028809	-0.12598
1.336	94.47	156.65	1130.93	-2.0129	0.55156	-0.31065	53.544	110.68478	1188.851	-2.0382	0.94483	-0.25264	-7.7674	-90.703	1202.211	-1.5044	0.57715	-0.23731	-5.617	38.335	17.5764	-0.082763	-0.014893	0.012207	6.263	35.512	24.7568	-0.037109	0.14648	-0.01123	-35.2311	27.176	1339.051	-2.3394	0.9751	-0.2666	52.726	-18.773	241.9352	-0.28516	-0.011719	-0.13379
1.338	49.3484	158.585	1090.773	-1.9663	0.5372	-0.30547	49.674	144.583	1155.611	-1.9722	0.91787	-0.24698	-20.5786	-85.18	1229.9204	-1.5425	0.54346	-0.23779	-19.2117	16.588249	7.7417	-0.077637	-0.0024414	0.0083008	21.57	32.6645	27.28224	-0.01416	0.13232	-0.0043945	-71.405	104.921	1293.544	-2.3223	0.95898	-0.25684	26.877	17.143	319.8282	-0.37256	0.00097655	-0.1438
1.34	36.723	121.324	1055.14	-1.918	0.51953	-0.29932	15.692	105.639	1146.074	-1.9102	0.88672	-0.24023	-37.8871	-26.857	1236.3554	-1.623	0.53613	-0.23438	-40.027	-14.3156	21.2535	-0.062988	0.01123	0.010254	16.023	80.31	3.9692	-0.0039063	0.12695	-0.0053711	-65.765	63.653	1311.411	-2.2695	0.92969	-0.24805	34.428	62.561	410.7394	-0.46875	0.018066	-0.15918
1.342	79.2989	192.462	1038.794	-1.8638	0.50752	-0.3	48.7105	159.3347	1115.368	-1.8465	0.85937	-0.24375	-3.457	-87.503	1291.864	-1.6758	0.54688	-0.23975	-22.467	36.7336	8.4007	-0.055664	0.020508	0.0083008	5.128	25.4464	7.7231	0.018555	0.10742	-0.0024414	-36.942	109.174	1287.7425	-2.2215	0.91089	-0.24243	35.961	127.2975	507.285	-0.61816	0.049805	-0.17676
1.344	37.804	117.07417	1034.729	-1.8078	0.49688	-0.30137	11.063	149.8926	1041.6211	-1.778	0.82588	-0.23545	-27.675	-83.787	1317.876	-1.7749	0.59619	-0.25879	-44.2674	4.0537	-1.2827	-0.04248	0.018555	-0.00048828	-1.498	37.7319	6.8373	0.039795	0.092773	-0.00073241	-60.1489	150.692	1220.681	-2.1636	0.89111	-0.23682	9.362	103.5574	631.333	-0.69873	0.072266	-0.17725
1.346	43.1611	106.764	1034.858	-1.7457	0.49219	-0.29668	46.531	143.2808	1028.448	-1.7108	0.79385	-0.23467	-67.7543	-74.647	1337.162	-1.8513	0.64672	-0.28271	-29.339	19.5572	8.7565	-0.02539	0.028321	-0.0053711	-8.729	40.248	-1.8541	0.053223	0.079102	0.00097656	-10.726	102.4085	1197.662	-2.0952	0.87744	-0.23486	32.912	76.67691	722.644	-0.89111	0.11865	-0.17334
1.348	-9.1472	124.709	999.569	-1.6867	0.49228	-0.28985	43.094	201.305	990.723	-1.646	0.75889	-0.23037	-50.5938	-131.8754	1379.248	-1.9272	0.70752	-0.30811	-16.617	44.639	-12.2036	-0.012695	0.027344	-0.01123	7.154	-3.28	19.9626	0.075684	0.057129	0.0048828	3.853	161.742	1186.036	-2.0566	0.85742	-0.24023	-24.351	47.329	738.3057	-1.0523	0.15405	-0.16578
1.35	-57.0332	41.463	951.107	-1.6245	0.4873	-0.28223	-19.054	177.075	969.65848	-1.582	0.72461	-0.22852	-77.386	-98.014	1372.017	-2.0332	0.79492	-0.34229	-40.945	2.7131	-6.7317	0.0087891	0.024902	-0.023438	16.328	53.371	-4.355	0.084473	0.050293	0.012207	-7.5706	126.257	1206.7313	-1.9819	0.83447	-0.22314	30.301	-33.629	817.368	-1.2031	0.19824	-0.14209
1.352	-23.231	111.206	902.875	-1.5705	0.4877	-0.2667	21.797	200.706	966.892	-1.5137	0.69219	-0.22695	-106.64	-148.82801	1400.6926	-2.082	0.83984	-0.35693	-9.067	32.3097	4.32058	0.024414	0.022461	-0.029785	21.1368	20.84161	-19.923	0.098633	0.02832	0.016113	9.611	85.871	1227.571	-1.9265	0.80689	-0.21948	67.305	-38.929	847.946	-1.4253	0.25635	-0.10107
1.354	-33.152	109.9363	849.856	-1.5226	0.48692	-0.254	-1.878	222.174	893.8493	-1.4488	0.66142	-0.22393	-30.857	-199.092	1427.719	-2.189	0.91455	-0.36816	-20.211	25.0931	-9.1534	0.034668	0.013672	-0.041504	11.203	-5.5258	-13.4894	0.11303	0.013428	0.019531	-8.332	124.732	1166.372	-1.8691	0.78516	-0.21191	1.51	-68.573	840.963	-1.5376	0.29443	-0.09375
1.356	-34.599	85.472	824.66	-1.4758	0.48848	-0.24814	-16.453	153.6037	867.6706	-1.3878	0.63799	-0.22197	-37.395	-155.091	1442.955	-2.2693	0.98072	-0.38867	-15.267	-4.7835	23.502	0.047363	0.0061035	-0.05249	-5.807	29.5977	-26.7709	0.12598	0.0063477	0.030273	15.842	51.76	1126.8606	-1.8027	0.74805	-0.20215	62.2605	-102.271	809.435	-1.7573	0.37549	-0.084473
1.358	-30.163	169.289	796.4952	-1.4243	0.48975	-0.23682	9.157	188.0926	821.4162	-1.3234	0.60732	-0.22012	-34.6351	-182.911	1466.733	-2.3491	1.0415	-0.39893	-0.547000000000001	24.315	22.4556	0.057129	-0.0014648	-0.0625	25.779	-7.1825	-7.3818	0.146	-0.01416	0.041504	35.9544	86.6109	1090.3436	-1.7637	0.72656	-0.19775	26.662	-119.1145	704.00437	-1.8925	0.44677	-0.082764
1.36	-37.9847	114.46098	780.0081	-1.3765	0.4917	-0.21973	-62.197	182.48044	785.4399	-1.2617	0.57422	-0.21533	-0.2325	-144.41	1475.511	-2.4429	1.1216	-0.41064	-3.662	0.8288	13.8444	0.060547	-0.015137	-0.07373	21.279	30.4332	10.0637	0.15918	-0.023926	0.04248	14.452	136.963	1055.526	-1.6948	0.69189	-0.18652	-26.394	-160.823	708.361	-2.021	0.53369	-0.10205
1.362	-17.451	141.703	781.517	-1.3255	0.49268	-0.21182	-26.412	177.0856	781.0115	-1.2017	0.55264	-0.21279	-27.9895	-98.322	1460.835	-2.5034	1.1777	-0.41797	20.922	22.7188	18.6013	0.062988	-0.017578	-0.082031	-1.594	49.913	10.2291	0.17871	-0.044434	0.053223	30.4233	101.007	1065.0902	-1.6433	0.6648	-0.18286	23.26	-132.259	757.3188	-2.1147	0.66846	-0.14209
1.364	9.731	195.005	737.2	-1.2749	0.48974	-0.19551	-17.481	218.332	733.599	-1.1409	0.52666	-0.21386	-0.108000000000001	-141.083	1494.012	-2.5522	1.229	-0.42529	18.3926	44.863	17.1676	0.064453	-0.032227	-0.099609	-7.557	17.5338	27.9248	0.19677	-0.057861	0.0542	40.168	172.126	1014.2771	-1.5913	0.64209	-0.1748	-24.0969	-95.21	785.76974	-2.1226	0.74365	-0.16016
1.366	-8.3	160.272	696.8104	-1.2217	0.48037	-0.18691	-63.801	161.32892	711.7146	-1.0823	0.504	-0.20566	-6.691	-58.4507	1476.0859	-2.603	1.2915	-0.43311	-5.927	-5.3862	44.784	0.0625	-0.040039	-0.11743	-44.5388	68.5	16.0203	0.21533	-0.074219	0.059082	27.2454	137.174	980.954	-1.5215	0.60498	-0.17383	-26.679	-90.267	813.8124	-2.0776	0.89893	-0.1792
1.368	-14.453	231.991	647.5113	-1.1711	0.46562	-0.17305	-28.133	168.0422	697.58	-1.0256	0.47402	-0.19609	-15.363	-25.476	1465.0876	-2.6245	1.3208	-0.43018	7.251	-6.726	63.8075	0.056641	-0.046875	-0.13184	-20.581	47.875	23.654	0.24219	-0.098145	0.059082	58.3297	119.2891	974.5716	-1.48	0.59229	-0.1709	-58.0014	-77.451	826.554	-2.0068	1.0076	-0.18555
1.37	-48.61459	207.1987	597.558	-1.1191	0.45068	-0.15918	-31.305	189.921	664.642	-0.96875	0.44775	-0.18994	31.9878	-29.3882	1485.30742	-2.6538	1.3657	-0.43506	8.512	-25.566	53.4358	0.037109	-0.047363	-0.16113	-19.889	34.814	42.21	0.25244	-0.10889	0.053711	33.916	184.348	924.9059	-1.4038	0.55811	-0.16064	-106.049	-104.3818	833.241	-1.9297	1.0996	-0.19922
1.372	-78.633	172.843	590.074	-1.0698	0.4376	-0.14971	-31.492	147.952989	655.876	-0.90976	0.41513	-0.18994	-6.619	53.033	1466.00375	-2.666	1.3872	-0.43335	3.858	-38.5879	104.8179	0.025879	-0.047852	-0.1748	-23.778	66.042	23.0743	0.27441	-0.13525	0.049316	8.05	144.824	922.6198	-1.3484	0.53687	-0.16577	-28.861	-105.348	889.108	-1.8335	1.1606	-0.22607
1.374	-30.3688	218.745	564.358	-1.0159	0.42158	-0.13877	-3.948	202.15	611.992	-0.85196	0.39043	-0.19004	-0.2347	6.7503	1456.215	-2.6738	1.4063	-0.42871	34.6916	5.087	145.061	-0.003418	-0.041016	-0.19141	-26.083	15.3467	8.6544	0.28711	-0.15161	0.042236	28.478	181.706	894.128	-1.293	0.51318	-0.16162	22.437	-60.73	904.9949	-1.7788	1.1465	-0.24659
1.376	-21.1478	129.461	534.897	-0.96748	0.4122	-0.12705	-48.6794	176.248	553.608	-0.79258	0.36231	-0.18653	27.8607	3.1236	1453.027	-2.687	1.4165	-0.43018	30.307	-16.73733	177.86238	-0.059082	-0.022461	-0.20752	-14.043	38.075	-3.5505	0.30029	-0.16406	0.035156	-23.3222	199.248	845.1991	-1.2163	0.48096	-0.1543	38.393	-67.32	932.794	-1.7397	1.0903	-0.25635
1.378	-9.632	137.5442	498.3696	-0.92305	0.39804	-0.11592	6.454	148.2376	530.458	-0.73535	0.33379	-0.17656	26.0184	44.351	1434.455	-2.6929	1.4106	-0.43115	35.853	1.0197	227.037	-0.087891	-0.016113	-0.22021	-17.634	46.3576	5.0246	0.30371	-0.18604	0.01416	-8.601	137.0579	823.654	-1.1763	0.46436	-0.15381	69.818	-105.678	929.497	-1.709	0.94727	-0.25684
1.38	-20.8363	159.54	465.86	-0.87158	0.37988	-0.10889	25.679	192.855	488.8978	-0.68115	0.30908	-0.16992	52.4632	-12.4599	1463.954	-2.6929	1.395	-0.41455	27.812	52.367	256.807	-0.16797	-0.00048828	-0.23926	-16.546	-2.097	35.881	0.30762	-0.19482	0.010742	-0.786999999999999	200.15	764.025	-1.1069	0.43408	-0.1499	11.624	-154.937	885.949	-1.7031	0.85156	-0.25732
1.382	-13.298	116.221	451.2415	-0.82266	0.37188	-0.10147	7.041	157.826	469.2781	-0.63047	0.2874	-0.16348	24.166	40.211	1463.5071	-2.6873	1.3811	-0.40405	-4.337	54.922	338.321	-0.23853	0.015137	-0.25342	15.502	42.0513	27.101	0.30664	-0.21191	-0.0024414	-16.102	179.41	744.077	-1.0564	0.41528	-0.14429	34.099	-234.0956	919.987	-1.7183	0.67236	-0.26025
1.384	27.4908	170.383	447.3718	-0.7711	0.35449	-0.090821	57.3349	186.16	446.854	-0.58721	0.26211	-0.15703	4.452	12.124	1444.944	-2.6753	1.3657	-0.39014	8.947	106.826	456.288	-0.31641	0.035156	-0.27441	-12.462	13.5639	20.7544	0.29785	-0.21851	-0.01294	-20.516	170.964	729.1541	-1.0073	0.39502	-0.13818	75.3462	-249.062	1001.583	-1.738	0.55787	-0.26587
1.386	38.9565	130.804	430.472	-0.72578	0.3416	-0.084961	18.866	196.839	396.2162	-0.53799	0.24141	-0.14922	29.9553	-51.348	1484.5686	-2.6523	1.3379	-0.38184	-10.111	131.3619	537.2022	-0.42969	0.061523	-0.30713	-14.538	9.9301	47.137	0.28711	-0.22656	-0.02002	-47.073	214.689	692.358	-0.94189	0.37158	-0.13184	7.712	-256.231	1080.545	-1.7593	0.46729	-0.26318
1.388	30.7897	95.1626	427.3299	-0.6792	0.32422	-0.077832	20.896	143.4555	380.75	-0.49531	0.21855	-0.13984	-3.7948	12.218	1483.03154	-2.6387	1.3223	-0.37109	-6	105.7005	631.6679	-0.48926	0.078125	-0.31543	-6.482	45.985	52.797	0.26807	-0.22314	-0.026855	-14.811	120.2958	693.345	-0.91553	0.36084	-0.12646	10.004	-277.116	1170.169	-1.8081	0.40283	-0.25342
1.39	4.609	151.719	395.816	-0.64209	0.30811	-0.072266	55.69585	175.145	359.3927	-0.44971	0.19678	-0.13037	-34.6323	-34.669	1486.5776	-2.6055	1.2793	-0.35938	-5.65	114.694	680.9362	-0.62891	0.11865	-0.33594	-6.42	-13.1767	55.516	0.25977	-0.22412	-0.025391	8.956	128.8452	678.686	-0.85254	0.33838	-0.11523	-41.663	-231.252	1159.282	-1.8359	0.39063	-0.24609
1.392	-33.259	124.77575	372.764	-0.5999	0.28994	-0.061035	14.187	147.456	338.838	-0.40869	0.17432	-0.12197	-13.501	3.284	1484.256	-2.5801	1.2403	-0.34961	-41.7995	52.859	715.0519	-0.73877	0.16211	-0.34864	14.725	12.0035	50.106	0.23047	-0.20361	-0.02832	-36.8635	147.784	651.409	-0.80738	0.31934	-0.10694	-33.247	-215.078	1189.16798	-1.8901	0.40967	-0.23047
1.394	-17.8045	163.28	350.247	-0.55732	0.2706	-0.05293	56.7748	135.186	338.9526	-0.36894	0.14805	-0.1166	-69.925	62.089	1440.8134	-2.5513	1.2026	-0.33643	-20.332	9.536	787.133	-0.86914	0.19727	-0.33887	1.527	9.4441	12.8276	0.21289	-0.18677	-0.023438	-19.196	110.875	622.501	-0.76318	0.30518	-0.098633	33.844	-172.056	1281.4455	-1.938	0.46142	-0.22461
1.396	-12.2896	169.796	299.662	-0.51396	0.2538	-0.050196	57.4926	167.148	293.46416	-0.32715	0.12617	-0.1084	-67.595	18.198	1443.3348	-2.521	1.1489	-0.31885	-1.88	-5.559	807.761	-1.0508	0.26758	-0.31738	-4.831	-36.688	25.4769	0.18945	-0.16797	-0.020996	-10.6	202.251	559.176	-0.69678	0.27979	-0.090332	26.416	-90.434	1303.723	-1.9824	0.52344	-0.21973
1.398	-38.8218	95.0477	269.9195	-0.47832	0.23379	-0.044922	24.904	136.33	262.497	-0.28838	0.10127	-0.09502	-50.2653	75.586	1404.851	-2.5024	1.1255	-0.31104	-5.456	-66.88	802.8706	-1.1484	0.30859	-0.29492	9.051	20.7064	23.3869	0.17432	-0.14014	-0.025391	-37.193	177.673	523.8854	-0.67383	0.26855	-0.079102	68.3145	-96.519	1331.0278	-2.0527	0.62109	-0.21729
1.4	-27.85841	116.4326	238.6829	-0.4375	0.21826	-0.036621	62.4791	159.076	253.5952	-0.24902	0.078613	-0.089355	-72.748	68.822	1374.5348	-2.4604	1.0845	-0.29883	25.741	-89.263	775.397	-1.3574	0.38818	-0.25391	26.151	3.0389	7.16922	0.1709	-0.12744	-0.020996	11.432	158.829	507.598	-0.60693	0.24658	-0.070313	102.8712	-65.388	1326.283	-2.0874	0.66846	-0.2124
1.402	-55.203	90.5069	225.3655	-0.40342	0.19619	-0.033007	28.633	142.951	237.25505	-0.21329	0.054199	-0.08711	-52.965	49.495	1387.1364	-2.4197	1.0564	-0.29126	-2.93865	-119.7361	713.024	-1.5281	0.46167	-0.22046	33.29	-5.8475	14.6217	0.15771	-0.10156	-0.025391	1.645	188.049	478.281	-0.56202	0.23145	-0.066163	81.716	-38.135	1306.058	-2.1636	0.76221	-0.21045
1.404	-38.2027	87.885	223.225	-0.37119	0.1791	-0.025684	6.436	99.003	233.2489	-0.18164	0.025195	-0.080274	-74.233	146.87	1363.148	-2.3784	1.0356	-0.27881	-32.978	-163.534	701.565	-1.73	0.5498	-0.20947	10.079	24.509	-1.0434	0.15015	-0.083008	-0.025879	19.687	110.6215	485.813	-0.51514	0.21338	-0.061523	121.824	-79.994	1344.163	-2.2329	0.83154	-0.21973
1.406	-11.419	141.06	212.453	-0.34697	0.16035	-0.013964	35.983	110.505	219.8222	-0.14258	0.0037108	-0.075977	-73.592	109.713	1347.387	-2.3179	0.98975	-0.26563	1.1266	-108.07	709.918	-1.9937	0.72119	-0.2002	8.779	-8.0106	6.0061	0.14697	-0.066895	-0.029785	27.523	140.6189	454.025	-0.45508	0.18701	-0.058594	113.9233	-36.592	1350.202	-2.3066	0.89453	-0.23145
1.408	-37.4181	83.394	169.711	-0.32901	0.14609	-0.0079099	-12.15	83.02596	190.7608	-0.11533	-0.021875	-0.070313	-46.2232	122.377	1331.3268	-2.2905	0.97119	-0.25586	2.5145	-85.647	732.61754	-2.0815	0.80518	-0.19141	5.508	25.242	2.00728	0.14551	-0.044434	-0.033203	5.5	150.2551	404.91	-0.42529	0.17432	-0.057617	49.003	-66.305	1337.62	-2.4082	0.97656	-0.25391
1.41	-39.0384	100.503	155.5701	-0.30811	0.13721	0.00048828	-14.784	82.349	208.188	-0.09082	-0.041992	-0.067871	-61.8076	155.173	1293.2422	-2.2266	0.9375	-0.24316	-20.522	-69.739	781.132	-2.1733	0.94678	-0.18701	5.116	31.341	-6.68316	0.14844	-0.035645	-0.041992	48.677	113.436	384.0881	-0.36719	0.14502	-0.054199	25.483	-105.738	1367.408	-2.4507	1.0024	-0.26904
1.412	-34.117	108.374	137.746	-0.30117	0.13027	0.0086915	-25.417	104.072	167.221	-0.067578	-0.062598	-0.06416	-42.5764	86.7129	1303.6598	-2.179	0.92212	-0.24292	-21.494	-54.057	787.129	-2.1472	1.0467	-0.21118	-11.693	-18.5694	21.722	0.14697	-0.015625	-0.051758	31.807	192.249	319.039	-0.32642	0.12524	-0.053223	-26.719	-61.67	1350.012	-2.5015	1.0376	-0.31006
1.414	-57.0064	49.705	173.702	-0.29297	0.1291	0.013086	-53.4909	72.92	140.1074	-0.046875	-0.07959	-0.061133	-36.0522	148.343	1289.4736	-2.1191	0.91016	-0.24121	-59.87979	-108.709	798.808	-2.0483	1.1353	-0.24316	-6.917	20.214	22.6629	0.14527	-0.0024414	-0.055664	44.9	140.815	305.679	-0.28906	0.10059	-0.050293	-19.44	-97.841	1408.05	-2.5063	1.0371	-0.3418
1.416	-43.5246	100.848	155.865	-0.28086	0.12714	0.016211	-19.765	86.623	128.5201	-0.027735	-0.09248	-0.061523	-50.103	138.966	1269.134	-2.0371	0.89844	-0.23682	-3.695	-99.091	831.4861	-1.853	1.2251	-0.30762	-9.243	-16.9052	-0.5022	0.14258	0.0097656	-0.060059	58.856	114.0129	291.7802	-0.24365	0.071777	-0.041016	51.347	-91.477	1486.833	-2.4863	1.0234	-0.37012
1.418	-46.611	62.0651	121.196	-0.2667	0.12803	0.020019	-38.2084	83.858	104.7372	-0.008887	-0.10264	-0.056641	-6.9886	88.32	1284.616	-1.9941	0.8877	-0.23633	25.548	-74.264	864.4061	-1.7515	1.2505	-0.3335	-11.826	-10.9733	4.6288	0.13672	0.030273	-0.063965	18.115	144.291	281.9909	-0.21826	0.05957	-0.041992	20.623	-83.755	1505.167	-2.4277	0.98047	-0.40625
1.42	-30.3612	46.339	97.845	-0.25391	0.12939	0.035645	-30.1696	55.447	116.083	0.0058594	-0.10986	-0.061035	-13.144	145.04	1268.399	-1.9175	0.85645	-0.22803	33.485	-101.48	914.9939	-1.5879	1.2559	-0.39746	-18.203	35.654	-17.577	0.13916	0.037109	-0.064941	49.497	91.4152	292.4395	-0.17578	0.030273	-0.037598	48.533	-124.853	1524.683	-2.3945	0.95117	-0.41992
1.422	-31.994	71.271191	66.312	-0.23799	0.12812	0.043262	-4.121	78.479	98.521	0.01748	-0.12363	-0.050489	-21.953	72.8813	1245.463	-1.8604	0.83252	-0.22485	74.628	-99.31	908.9874	-1.5095	1.2014	-0.42456	-8.557	-5.369416	-4.441	0.12744	0.058594	-0.075195	54.22293	123.661	248.0996	-0.15112	0.0075686	-0.042481	74.892	-77.49366	1502.378	-2.3257	0.89307	-0.43604
1.424	-40.2642	8.658	77.101	-0.22862	0.12021	0.042383	-51.8454	63.41	78.3474	0.02832	-0.13017	-0.04961	24.853	85.196	1204.001	-1.8086	0.80078	-0.21826	52.752	-163.021	888.388	-1.4648	1.0879	-0.44141	-8.245	19.5486	-2.663	0.12134	0.064453	-0.069824	32.144	117.346	226.091	-0.12842	-0.014648	-0.042969	67.9265	-62.029	1476.08	-2.2891	0.85254	-0.44385
1.426	0.324999999999996	40.981	68.153	-0.21103	0.11201	0.048242	-18.882	51.204	91.805	0.034179	-0.13682	-0.042578	14.692	136.851	1146.4262	-1.7441	0.76758	-0.20752	76.977	-246.4926	926.238	-1.4546	0.85791	-0.44775	-9.182	13.1951	-21.6378	0.11377	0.078125	-0.067871	30.692	71.817	217.9015	-0.087402	-0.036133	-0.036621	117.34553	-61.715	1495.5945	-2.2578	0.80469	-0.44629
1.428	7.55	31.862	52.126	-0.19239	0.1085	0.053515	-29.293	64.189	67.56	0.045899	-0.14072	-0.037402	49.609	90.323	1140.48259	-1.7148	0.74805	-0.20215	74.87731	-250.622	994.025	-1.4629	0.72949	-0.45215	-18.323	-17.507	-11.6684	0.10449	0.099609	-0.071777	2.404	115.12162	191.637	-0.076172	-0.04834	-0.035645	68.211	-8.997	1451.457	-2.2344	0.74414	-0.4458
1.43	2.422	-5.2237	47.9405	-0.17334	0.10156	0.064941	-37.7001	37.559	47.939234	0.054688	-0.14209	-0.030273	56.058	167.9381	1115.7554	-1.6489	0.71143	-0.1958	44.718	-275.576	1059.67	-1.5015	0.50439	-0.45264	-26.208	26.4052	-2.2481	0.097168	0.10986	-0.068359	-15.379	89.3846	175.1888	-0.052246	-0.069824	-0.032227	35.595	-64.86	1432.747	-2.2183	0.71729	-0.44824
1.432	38.061	36.733	30.149	-0.15527	0.098537	0.074218	16.477	58.362	52.4554	0.066015	-0.1499	-0.026562	28.4476	170.537	1088.70793	-1.5984	0.69165	-0.1897	17.491	-260.477	1127.679	-1.5518	0.37549	-0.44995	-22.074	32.1814	5.7819	0.090332	0.13135	-0.068359	10.108	81.9159	182.0829	-0.037842	-0.079101	-0.029053	31.493	-57.4143	1433.1166	-2.2007	0.67139	-0.44287
1.434	12.853	20.5142	13.1562	-0.13613	0.089649	0.075586	-12.812	58.355	38.101	0.074414	-0.15312	-0.023926	59.16383	131.008	1083.518	-1.5508	0.6748	-0.18652	-19.085	-225.819	1143.412	-1.6196	0.2876	-0.43799	-8.654	40.0978	14.3355	0.077393	0.1455	-0.065429	-30.727	105.31	155.3158	-0.025391	-0.09082	-0.030273	-38.116	-9.064	1434.6371	-2.198	0.63916	-0.44018
1.436	21.17	40.492	13.4037	-0.11895	0.085742	0.081055	-7.896	23.0306	51.812	0.080274	-0.15938	-0.020411	28.077	207.098	1038.937	-1.4858	0.65186	-0.17822	-58.2758	-245.408	1182.402	-1.7344	0.24707	-0.4248	-14.443	70.55	-3.6677	0.06543	0.16016	-0.063965	-34.25	43.4712	147.652	-0.01709	-0.10156	-0.031738	6.954	-13.1972	1457.952271	-2.1895	0.61719	-0.43164
1.438	55.5692	77.592	-5.7707	-0.10185	0.077637	0.08418	37.4179	32.5071	31.656	0.09209	-0.16191	-0.017871	20.506	161.5204	1014.308	-1.4551	0.64453	-0.1748	1.963	-185.989	1241.538	-1.8027	0.25781	-0.42578	-34.0684	33.491	-7.2365	0.053223	0.17969	-0.0625	-16.277	78.382	111.135	-0.010254	-0.10547	-0.027344	38.951	64.3971	1453.2503	-2.1875	0.6123	-0.42627
1.44	16.245	23.4583	16.6527	-0.083984	0.070801	0.084961	-2.93	-0.1991	14.0517	0.10156	-0.16455	-0.016602	24.251	186.0239	984.738	-1.3892	0.62549	-0.16455	20.253	-152.2259	1268.2209	-1.9312	0.35596	-0.41943	-5.997	44.663	3.428	0.047363	0.19141	-0.061523	-49.7249	87.022	81.708	-0.0063477	-0.11328	-0.023926	2.335	54.734	1414.0182	-2.189	0.60693	-0.41943
1.442	20.036	37.6396	34.387	-0.071484	0.065527	0.088574	34.624	-13.5986	32.2787	0.11094	-0.16972	-0.012793	0.180999999999997	225.51	927.708	-1.3452	0.61377	-0.15601	22.17	-143.736	1318.28926	-2.0156	0.47168	-0.41211	6.426	57.877	7.1351	0.036621	0.20947	-0.062012	-11.687	51.1175	97.4908	-0.0063476	-0.12061	-0.020508	31.985	-10.492	1411.99987	-2.1851	0.60986	-0.4126
1.444	15.5154	24.77	14.766625	-0.054688	0.061621	0.092578	52.3178	20.3171	26.3867	0.12256	-0.17695	-0.013379	19.778	147.896	900.6731	-1.3022	0.60059	-0.14697	54.5057	-71.935	1312.196	-2.0898	0.59473	-0.40918	3.868	19.189	14.103	0.021973	0.22486	-0.059082	-13.93	80.721	96.3269	-0.0092773	-0.12354	-0.021484	27.779	50.4722	1382.7533	-2.1885	0.61377	-0.40893
1.446	9.847	-8.1521	32.797	-0.041406	0.052246	0.091016	21.67	15.5237	22.2457	0.13428	-0.18086	-0.016504	-3.33799999999999	190.3558	845.807	-1.23	0.57861	-0.14014	42.0974	-64.676	1311.502	-2.1655	0.75439	-0.41162	6.858	47.81	11.9038	0.011719	0.24121	-0.061035	-48.01426	44.3592	91.82601	-0.011719	-0.13477	-0.010254	64.127	17.521	1382.771	-2.1851	0.62354	-0.40527
1.448	32.002	35.072	15.4071	-0.027344	0.045606	0.089258	66.037	27.0607	13.2525	0.14219	-0.19141	-0.0048828	-34.2387	167.512	808.464	-1.1973	0.56738	-0.1333	86.6375	-58.123	1349.3669	-2.1968	0.82861	-0.40771	10.361	14.3407	7.04941	0.00048828	0.26318	-0.061523	-16.26	46.0536	82.62	-0.0073242	-0.13379	-0.02002	135.6354	37.914	1419.324	-2.1792	0.63721	-0.39697
1.45	9.16	10.1153	-2.107	-0.0092773	0.037598	0.089355	24.861	38.454	-5.91957	0.13965	-0.19971	-0.0053711	-7.224	144.315	814.0025	-1.1309	0.54492	-0.12402	91.1842	-27.475	1338.65419	-2.2417	0.94189	-0.40479	4.48	-16.3448	44.119	-0.0087891	0.27246	-0.06543	-26.377	86.919	44.814	-0.0083008	-0.13525	-0.010254	97.13	68.071	1377.4439	-2.1758	0.63867	-0.39355
1.452	-0.342000000000002	-10.7189	1.024	0.006543	0.027149	0.093262	12.711	10.2607	7.938	0.14492	-0.20362	-0.0038086	-33.328	226.186	790.6294	-1.0767	0.52832	-0.11719	50.089	-81.072	1354.933	-2.2734	1.001	-0.41113	16.231	11.86	56.9887	-0.024902	0.29297	-0.069824	-10.036	51.414	46.05	-0.0053711	-0.13794	-0.0065918	88.9174	-12.11	1372.5916	-2.1577	0.62842	-0.38379
1.454	0.234999999999999	20.0802	-22.9103	0.019141	0.011133	0.091992	29.673	33.437	-7.2547	0.14258	-0.21094	0.00019531	-37.5	169.945	777.297	-1.0239	0.50439	-0.1123	36.715	-71.0454	1388.6738	-2.3022	1.0571	-0.41992	13.036	-34.634	78.5639	-0.044922	0.30396	-0.084229	-14.278	70.874	42.2781	0	-0.13525	-0.0014648	90.5054	19.0909	1357.206	-2.1523	0.61523	-0.37744
1.456	2.212	-18.4504	4.5694	0.032422	0.0017578	0.095899	0.152999999999999	25.424	-5.1756	0.13555	-0.21602	0.0091798	-14.781	169.5298	748.825	-0.95703	0.47949	-0.10498	-21.23	-53.922	1389.5	-2.353	1.0923	-0.43506	2.843	-18.49	118.3834	-0.061035	0.32373	-0.096191	-26.862	64.439	18.57	0.012207	-0.13037	-0.00048828	72.419	24.0423	1336.545	-2.146	0.60791	-0.36963
1.458	15.449	16.40732	29.8881	0.040723	-0.0080077	0.099709	16.292	6.6589	20.887	0.12783	-0.2209	0.015625	-32.132	192.765	698.0721	-0.9165	0.4624	-0.1001	-12.434	-90.013	1453.7142	-2.3804	1.1079	-0.44678	-15.05709	-15.2	173.6915	-0.10205	0.34229	-0.1167	11.862	17.9562	47.2156	0.017578	-0.12988	0.00048828	114.9966	11.959	1368.2972	-2.1323	0.59619	-0.35889
1.46	-6.163	31.586	19.8519	0.055664	-0.019531	0.10254	11.306	22.0372	8.828	0.11719	-0.22217	0.022949	-23.329	139.873	682.9523	-0.85059	0.43359	-0.091797	34.159	-61.3	1499.4	-2.4409	1.1118	-0.46045	-16.9814	-67.0782	255.67456	-0.12012	0.35791	-0.12891	9.305	45.397	44.5694	0.035645	-0.11816	-0.0019531	54.488	86.635	1325.715	-2.1206	0.59619	-0.36182
1.462	-27.881	15.5244	23.9344	0.062988	-0.026465	0.1126	-20.014	-1.641	15.9797	0.10322	-0.22129	0.030274	-49.637	209.164	619.152	-0.79907	0.4065	-0.086182	7.988	-87.674	1505.759	-2.4805	1.1065	-0.4712	-3.077	-33.129	330.359	-0.18408	0.37744	-0.15674	6.498	3.3856	45.6957	0.054688	-0.11377	-0.0019531	10.169	42.637	1263.671	-2.0874	0.59619	-0.35303
1.464	-38.104	69.305	15.6239	0.069629	-0.0375	0.12041	5.108	31.043	9.7729	0.084375	-0.21875	0.039649	-54.8732	199.066	592.235	-0.74756	0.38037	-0.077148	46.247	-111.595	1534.872	-2.5151	1.1021	-0.48877	-61.145	-62.761	406.105	-0.24048	0.39477	-0.1853	39.988	5.5126	32.9421	0.062988	-0.11279	-0.0039063	57.304	55.371	1252.246	-2.0564	0.60572	-0.35132
1.466	-50.6738	48.933	10.2429	0.080176	-0.047656	0.12705	-35.84	55.004	0.686999999999999	0.062891	-0.21328	0.047851	-23.574	158.4632	568.7019	-0.68408	0.34619	-0.073242	63.105	-67.5227	1511.582	-2.5405	1.0845	-0.51514	-108.707	-66.1056	526.2307	-0.31006	0.41064	-0.21924	25.722	50.053	-8.047	0.072754	-0.10986	-0.0043945	34.867	102.617	1220.09	-2.0215	0.6123	-0.33887
1.468	-23.752	30.4079	32.4565	0.093653	-0.051953	0.129	-37.0939	33.1876	22.0993	0.043848	-0.20244	0.059863	-2.582	202.833	527.4673	-0.65234	0.32617	-0.066406	55.111	-90.059	1506.976	-2.5444	1.0767	-0.51709	-132.584	-22.313	576.8236	-0.41211	0.43604	-0.25439	43.1147	15.8676	3.4418	0.078613	-0.11426	-0.0024414	54.096	76.969	1219.439	-1.9702	0.62256	-0.32568
1.47	-30.692	45.993	20.7009	0.10938	-0.064453	0.13184	-17.339	40.474	8.7714	0.025391	-0.19824	0.06543	-2.599	134.8676	519.255	-0.59131	0.2876	-0.061523	118.34282	-59.735	1533.906	-2.5215	1.0645	-0.53516	-139.095	-30.4289	607.757	-0.47363	0.44629	-0.27148	38.185	28.3599	14.9977	0.078613	-0.11523	0.0039063	77.117	145.901	1190.125	-1.9414	0.62891	-0.32227
1.472	-59.5807	5.275	12.0757	0.12266	-0.073144	0.13349	-69.3691	13.635	-0.446	0.0017578	-0.18379	0.080567	14.337	157.5957	487.25246	-0.54566	0.26636	-0.054932	95.311	-21.154	1499.378	-2.4898	1.0566	-0.55322	-109.963	-1.049	645.074	-0.61328	0.46875	-0.30664	13.55	15.6805	7.2456	0.078125	-0.12793	-0.0029297	52.249	155.336	1143.901	-1.8848	0.6377	-0.30176
1.474	-21.889	35.11044	8.2333	0.1417	-0.080664	0.12861	-9.904	-1.043	34.1546	-0.015332	-0.17783	0.08789	10.293	216.557	449.7847	-0.49951	0.23877	-0.050781	67.4663	-65.92	1491.111	-2.4429	1.0396	-0.56396	-63.86	-5.462	684.271	-0.72998	0.48682	-0.32056	43.2494	-19.9922	31.7311	0.070313	-0.13184	0.0078125	60.536	114.287	1150.28	-1.8394	0.64697	-0.29566
1.476	-19.0297	36.93295	-1.9609	0.15732	-0.092773	0.12861	-28.283	16.6625	23.263	-0.035254	-0.16611	0.094922	25.337	168.846	414.555	-0.44531	0.20752	-0.052734	79.5574	-15.681	1479.2018	-2.3823	1.0278	-0.58545	-44.269	-67.414	750.342	-0.85107	0.50635	-0.32373	17.077	49.368	-2.2908	0.063965	-0.13867	0.01123	48.501	175.203	1116.6993	-1.791	0.65039	-0.28711
1.478	-21.55	0.0820000000000007	23.9778	0.17783	-0.10362	0.12188	-50.42	5.796	32.1091	-0.050976	-0.15303	0.10215	19.488	208.753	372.145	-0.4165	0.19287	-0.047363	-0.0390000000000015	2.451	1451.5864	-2.3496	1.0195	-0.5918	-43.953	-33.044	744.357	-1.0239	0.51904	-0.31299	2.671	25.2996	23.884	0.05542	-0.14258	0.019776	42.625	119.243	1103.5402	-1.7173	0.65674	-0.26904
1.48	29.414	31.2886	26.6199	0.19238	-0.11768	0.11475	-13.627	33.651	36.0341	-0.062012	-0.14551	0.10986	20.686	185.651	349.873	-0.36768	0.15381	-0.043945	10.828	4.056	1481.3861	-2.2925	0.98975	-0.59229	-3.621	-30.3859	742.309	-1.153	0.51904	-0.30616	9.665	23.39468	36.188	0.050781	-0.14697	0.027832	53.829	109.4701	1098.3328	-1.6792	0.65869	-0.26025
1.482	3.941	7.8997	14.50776	0.20527	-0.13194	0.10693	-43.2797	51.225	12.6385	-0.066113	-0.13906	0.1124	52.728	140.5408	348.7776	-0.3269	0.13111	-0.04126	38.666	74.914	1458.6847	-2.2519	0.96191	-0.59522	5.64699999999999	-49.624	782.371	-1.2954	0.52783	-0.30469	-15.015	45.121	-0.15064	0.041992	-0.14648	0.03418	-28.84	131.4294	1063.724	-1.606	0.65674	-0.24072
1.484	6.034	6.06632	33.5125	0.21347	-0.14873	0.097657	-18.717	34.4739	20.64283	-0.068652	-0.13477	0.11211	63.1358	209.866	339.45	-0.29297	0.10596	-0.04248	-8.709	28.684	1451.3313	-2.2168	0.93164	-0.59229	24.933	-8.39	770.5323	-1.4897	0.5542	-0.30908	10.756	4.1976	14.6049	0.04248	-0.14746	0.035645	-38.587	72.615	1050.921	-1.5505	0.65845	-0.22973
1.486	13.963	43.861	45.839	0.22129	-0.16435	0.0875	14.362	38.994	37.169	-0.065918	-0.13789	0.11446	52.47139	139.649	337.551	-0.25195	0.075684	-0.040527	22.083	22.653	1459.6033	-2.1797	0.88867	-0.59375	30.907	-61.9871	739.86	-1.5952	0.58838	-0.3125	6.611	25.087	2.3147	0.040527	-0.15039	0.044434	-26.964	141.462	997.369	-1.5005	0.65576	-0.20752
1.488	-10.481	-1.2846	50.348	0.22334	-0.18281	0.081934	-33.966	15.0392	15.10933	-0.057129	-0.13984	0.11269	39.094	152.1	322.659	-0.2334	0.062012	-0.041992	25.16	38.7935	1412.6217	-2.1699	0.86914	-0.58789	43.282	-55.734	730.425	-1.7632	0.66064	-0.30615	-39.9889	29.0557	14.578	0.039795	-0.1499	0.050293	-32.866	144.4978	966.99637	-1.4312	0.64307	-0.18652
1.49	27.089	14.7604	40.597	0.22314	-0.19824	0.075684	12.399	-0.998000000000001	12.8094	-0.050781	-0.14648	0.11426	26.495	168.818	267.60635	-0.19434	0.033203	-0.041504	36.98	-1.9483	1433.2166	-2.1387	0.83203	-0.57813	16.364	-59.081	752.837	-1.8833	0.7251	-0.31006	-7.292	2.96906	18.0889	0.040039	-0.15039	0.053711	26.926	115.475	934.607	-1.4004	0.63281	-0.17578
1.492	33.4898	16.9482	13.4718	0.21425	-0.21035	0.066699	34.0489	25.0558	4.4298	-0.042578	-0.15518	0.11308	51.9038	92.584	246.0366	-0.17017	0.014404	-0.045166	120.8872	53.6915	1443.4464	-2.1162	0.81494	-0.58008	-12.233	-120.946	835.946	-1.9766	0.80273	-0.30811	-34.584	41.583	-2.7591	0.042969	-0.14795	0.058594	-13.599	181.701	885.284	-1.3315	0.61572	-0.15283
1.494	9.276	-18.7158	27.6793	0.20029	-0.21719	0.071484	-4.694	16.301	2.6363	-0.03711	-0.16924	0.11162	38.98	148.303	222.7782	-0.14551	-0.0024414	-0.040039	64.592	41.877	1424.84227	-2.0918	0.80078	-0.56641	23.371	-77.898	898.784	-2.0254	0.90039	-0.30127	-40.4867	20.318	1.677	0.05127	-0.14795	0.058105	-23.038	143.212	877.5917	-1.2832	0.60596	-0.13404
1.496	20.298	31.753	23.1598	0.19092	-0.22578	0.062891	44.349	19.6257	27.4726	-0.033594	-0.17549	0.11241	9.374	105.4291	219.9384	-0.125	-0.021484	-0.041504	67.92	-8.497	1446.282	-2.0566	0.78613	-0.55713	44.185	-103.174	895.081	-2.0181	0.93799	-0.29932	-16.075	-3.0735	35.476	0.054688	-0.15576	0.058105	31.383	167.264	866.944	-1.2319	0.58838	-0.12402
1.498	16.966	10.81712	19.0103	0.17969	-0.22216	0.061817	29.001	23.9432	18.4156	-0.02832	-0.18535	0.11113	15.076	71.076	217.461	-0.11133	-0.031738	-0.038086	74.308	27.23	1397.254	-2.041	0.7793	-0.5498	78.7319	-162.213	916.123	-1.98	1.0024	-0.30908	-51.0242	28.6987	36.076	0.066162	-0.15966	0.054932	36.054	202.814	859.061	-1.1563	0.57324	-0.11426
1.5	17.479	12.7318	12.5279	0.16016	-0.21875	0.060059	22.753	11.6014	33.1886	-0.024902	-0.19238	0.10938	-12.887	130.378	185.82	-0.091309	-0.049316	-0.039063	47.761	3.653	1390.1145	-2.0234	0.76953	-0.53516	109.119	-163.59395	904.296	-1.9302	1.0269	-0.30517	-34.242	-5.7053	45.678	0.074219	-0.16895	0.056152	49.4231	156.663	845.6103	-1.1167	0.57227	-0.10938
1.502	40.9944	44.174	-2.8636	0.15175	-0.20596	0.05586	49.66514	38.253	41.167	-0.023145	-0.19365	0.10781	-16.152	72.937	178.29	-0.082032	-0.053956	-0.039063	74.174	31.446	1415.329	-2.0103	0.76856	-0.52125	88.946	-228.507	909.013	-1.8706	1.0396	-0.31592	-22.118	21.8247	24.7954	0.08252	-0.18311	0.056641	39.75	205.614	789.3848	-1.0327	0.55127	-0.098633
1.504	9.81	-2.8961	1.3668	0.13848	-0.18926	0.056641	15.289	16.2549	25.1568	-0.025879	-0.19522	0.10723	-2.561	91.925	181.606	-0.071289	-0.058594	-0.038086	35.912	74.786	1350.4045	-2.0054	0.76123	-0.50342	102.3391	-236.125	987.477	-1.7954	1.0142	-0.32373	-34.3202	30.5518	7.5721	0.083496	-0.18408	0.057129	-10.804	189.707	725.536	-0.96973	0.53418	-0.094971
1.506	2.808	28.6265	20.8696	0.13066	-0.17051	0.054687	36.302	-1.6515	27.711	-0.030957	-0.19365	0.10567	-36.238	103.678	161.194	-0.059082	-0.070313	-0.032227	5.878	28.279	1319.23549	-1.9883	0.75391	-0.48438	96.4297	-225.4	1035.58	-1.7642	0.98682	-0.33252	-2.662	-3.58581	11.0787	0.086426	-0.19824	0.057617	-27.5883	159.694	700.6912	-0.90674	0.51318	-0.086914
1.508	10.71	31.993	8.5677	0.12178	-0.14668	0.048535	34.558	7.1546	-4.1217	-0.034863	-0.18818	0.10635	-19.185	70.1823	141.55526	-0.053955	-0.072021	-0.035156	37.683	70.065	1292.23	-1.9858	0.75244	-0.47363	50.01	-288.682	1083.141	-1.7202	0.90381	-0.34131	-21.024	28.77	1.1617	0.085205	-0.2063	0.057128	-28.376	218.6182	666.81235	-0.82617	0.46973	-0.082031
1.51	-3.983	5.5027	26.9099	0.11865	-0.12402	0.040527	-11.684	-9.137	-3.6896	-0.046875	-0.18213	0.10547	-49.4261	127.195	96.80291	-0.04541	-0.075195	-0.032715	6.47	74.6441	1262.47103	-1.9702	0.75244	-0.45654	16.278	-278.546	1131.903	-1.7136	0.82544	-0.35449	-9.654	13.03806	1.2045	0.07959	-0.21289	0.052734	-7.792	148.066	648.8241	-0.79443	0.45215	-0.075684
1.512	-8.375	24.719	42.356	0.11387	-0.099511	0.03623	18.291	5.9554	18.5917	-0.055664	-0.16807	0.1085	-52.4284	81.0599	98.072	-0.037109	-0.077637	-0.030273	42.297	68.737	1276.175	-1.9441	0.75562	-0.44604	7.8266	-258.128	1144.599	-1.7163	0.74854	-0.36377	11.833	5.4837	22.30724	0.07373	-0.22021	0.060059	22.487	125.637	616.717	-0.73535	0.41797	-0.070313
1.514	-32.1871	-17.3829	15.802	0.11426	-0.077246	0.028223	1.554	9.0565	10.945	-0.065722	-0.15537	0.10918	-17.642	53.7157	108.624	-0.037109	-0.078613	-0.027832	97.13	141.246	1235.8467	-1.916	0.76563	-0.43652	-13.924	-246.805	1215.831	-1.7427	0.66553	-0.37646	3.579	49.488	22.1103	0.065918	-0.229	0.059082	-14.448	133.85212	580.065	-0.69458	0.39673	-0.062988
1.516	-27.888	-14.097	11.3701	0.1209	-0.059277	0.021582	-6.195	0.93038	21.40265	-0.07627	-0.13662	0.11309	-47.0425	83.359	71.5009	-0.023438	-0.082031	-0.024902	48.625	116.033	1189.209	-1.8628	0.76416	-0.42529	-8.1674	-143.58	1252.867	-1.7617	0.63574	-0.38184	12.017	-5.681033	30.7405	0.054688	-0.23145	0.061523	5.308	89.821	567.948	-0.65625	0.37793	-0.058594
1.518	-21.69	30.015	-5.9333	0.12422	-0.042188	0.017969	1.844	36.99	19.5572	-0.091894	-0.11855	0.11416	-41.6685	36.333	54.0317	-0.017334	-0.083496	-0.023682	72.236	134.837	1191.8588	-1.8354	0.76611	-0.41846	-44.3032	-108.892	1246.695	-1.8379	0.61719	-0.40723	33.244	13.5558	10.541	0.036377	-0.23218	0.0625	15.008	161.242	546.7708	-0.61426	0.36475	-0.055176
1.52	-42.5159	-1.0676	5.8384	0.13037	-0.02832	0.012207	-34.1826	39.046	6.9382	-0.10938	-0.099121	0.11523	-13.876	60.257	55.631	-0.010742	-0.084473	-0.022461	64.978	165.609	1144.8863	-1.7847	0.74854	-0.40186	-33.219	-102.283	1298.9819	-1.9078	0.62842	-0.42749	18.832	32.7203	-21.463	0.023438	-0.23291	0.063477	-6.721	171.216	511.821	-0.57495	0.35327	-0.053467
1.522	-6.636	19.1457	14.3071	0.13965	-0.016894	0.0069336	-10.365	18.0656	31.5852	-0.11738	-0.077246	0.11494	-34.2908	74.842	53.9981	0.0068359	-0.084961	-0.023926	38.023	111.031	1133.498	-1.7319	0.729	-0.38281	-28.811	-62.114	1300.9364	-1.978	0.65967	-0.45801	27.478	7.9806	3.8654	0.0053711	-0.22021	0.0625	23.812	153.739	487.495	-0.53516	0.33789	-0.050781
1.524	-15.735	12.4013	-2.00612	0.14883	-0.013281	-0.0017578	-26.308	25.717	3.8951	-0.12822	-0.062598	0.11513	-7.762	22.413	70.0205	0.016602	-0.089355	-0.020996	83.586	146.968	1127.007	-1.7051	0.7207	-0.37109	-50.082	-93.605	1335.649	-2.0757	0.71436	-0.49365	25.958	52.266	8.2394	-0.0092773	-0.21973	0.071777	-2.329	191.993	441.114	-0.48193	0.32666	-0.050781
1.526	-37.264	-8.7163	-7.411967	0.15508	-0.010156	-0.0072266	-76.323	0.936	-4.0928	-0.1333	-0.041504	0.11084	-13.676	61.3424	35	0.029297	-0.089355	-0.023438	-8.6	112.916	1099.5041	-1.6484	0.70508	-0.35352	-15.167	-64.733	1403.7366	-2.127	0.75586	-0.51563	28.3169	17.2364	12.4133	-0.033203	-0.19971	0.072266	-26.40469	132.3966	425.124	-0.45947	0.31836	-0.049805
1.528	9.941	34.018	4.299944	0.16309	-0.0057617	-0.01123	-12.293	9.8675	14.4342	-0.13799	-0.02002	0.10733	-0.944000000000003	30.5533	33.8643	0.04248	-0.094482	-0.016113	-6.748	75.055	1100.837	-1.6111	0.69751	-0.34448	-19.144	-38.887	1406.1326	-2.2227	0.84375	-0.55664	39.785	-0.622300000000001	22.0374	-0.049316	-0.1853	0.076904	-23.219	151.6255	396.186	-0.41357	0.2959	-0.04541
1.53	-37.68855	29.441	14.4623	0.16797	-0.0048828	-0.013184	-31.4654	19.2824	-4.0753	-0.1377	-0.0039063	0.10107	30.085	3.333	44.143	0.054688	-0.10059	-0.023926	12.321	137.0873	1048.335	-1.5625	0.69238	-0.33398	-52.271	-91.148	1442.3767	-2.2971	0.91529	-0.57837	10.105	36.2337	10.4969	-0.064941	-0.16748	0.081055	-66.028	170.308	362.7383	-0.37622	0.28125	-0.05249
1.532	-27.829	30.65	29.709	0.17383	-0.0030274	-0.013379	-38.6123	3.98434	22.3928	-0.13506	0.0077146	0.096289	13.321	32.459	24.92	0.06543	-0.10303	-0.020996	-21.844	108.195	1011.4689	-1.5029	0.68555	-0.31738	-55.14456	-74.924	1454.1765	-2.3691	0.98242	-0.59863	19.625	-11.7877	22.7469	-0.089844	-0.13965	0.089355	-45.58392	106.3659	350.83336	-0.34766	0.26904	-0.04541
1.534	17.565	62.583	11.0111	0.17607	-0.0046875	-0.018945	-19.116	27.6863	13.3974	-0.13047	0.020606	0.082324	18.094	-5.8969	19.4197	0.069336	-0.10742	-0.020508	25.436	135.15581	1001.924	-1.4629	0.67871	-0.31055	-89.766	-108.182	1436.491	-2.4629	1.0801	-0.61621	13.019	16.9616	21.7664	-0.1001	-0.12646	0.093262	-59.916	136.3921	294.6307	-0.30713	0.25439	-0.050781
1.536	-27.5384	13.1817	4.4835	0.17256	-0.0039063	-0.022851	-58.7916	25.8136	-19.8301	-0.12461	0.025683	0.07334	36.582	17.19	14.5829	0.083496	-0.10986	-0.015137	19.201	171.974	955.358	-1.3965	0.65869	-0.29395	-44.989	-143.872	1514.63	-2.5059	1.123	-0.62305	-15.867	31.3682	7.0748	-0.11133	-0.10449	0.10107	-89.099	96.91	262.758	-0.29053	0.24707	-0.048828
1.538	12.535	27.207	16.0633	0.16983	0.0013672	-0.021777	7.697	19.69599	12.2721	-0.11143	0.034668	0.060547	47.39862	31.679	3.4366	0.086914	-0.11645	-0.011231	-12.333	130.9425	939.093	-1.3428	0.63965	-0.27929	-31.163	-114.655	1555.009	-2.584	1.2051	-0.63867	-3.568	-3.6896	0.574	-0.11865	-0.084473	0.10425	-31.9053	75.966	244.4366	-0.25391	0.23438	-0.04541
1.54	38.4735	30.6384	17.0409	0.16553	0.00097656	-0.022949	9.797	27.424	17.7227	-0.098633	0.040039	0.047852	48.614	-19.7135	29.5911	0.092285	-0.12354	-0.0078125	35.77	190.403	917.92	-1.2964	0.62158	-0.26123	-36.3968	-148.436	1564.459	-2.6345	1.2659	-0.63794	1.043	36.8567	-3.224	-0.12451	-0.063965	0.10742	-29.665	141.237	220.651	-0.22827	0.22754	-0.044189
1.542	-3.336	5.5269	16.023	0.15898	0.0052734	-0.024316	-27.551	-2.99147	26.2772	-0.084375	0.0375	0.032715	10.502	34.082	4.916	0.097168	-0.12988	-0.0063477	24.678	190.159	902.085	-1.2422	0.60156	-0.23779	12.8872	-134.826	1599.975	-2.6777	1.3223	-0.64453	-22.765	9.469	11.6017	-0.12695	-0.043457	0.10645	-35.1464	105.877	222.2981	-0.20459	0.21484	-0.041992
1.544	32.052	39.788	0.901000000000002	0.15401	0.013281	-0.020606	26.54	3.2284	31.71454	-0.064941	0.038672	0.018457	4.792	25.296	-16.9204	0.10303	-0.13672	-4.5103e-14	17.381	174.618	894.927	-1.2153	0.58301	-0.23096	33.75	-82.167	1581.202	-2.728	1.3794	-0.646	-14.076	11.55823	26.8071	-0.12793	-0.037109	0.10938	-20.8458	120.252	186.805	-0.17285	0.19238	-0.049805
1.546	28.871	18.8667	-2.2758	0.14698	0.023047	-0.02295	17.079	17.7016	19.63	-0.053613	0.03164	0.0016602	34.8703	23.6797	1.2387	0.10645	-0.14551	0.0053711	31.288	229.105	846.795	-1.1694	0.56592	-0.20508	25.3076	-109.718	1599.768	-2.75	1.4023	-0.63672	-21.15	65.162	9.793	-0.12549	-0.023438	0.10107	-49.579	133.727	153.1301	-0.15869	0.1792	-0.043945
1.548	7.506	0.2117	23.2344	0.13252	0.031738	-0.018457	6.024	-7.929	45.2427	-0.038477	0.023926	-0.018848	21.227	52.474	-8.1753	0.11133	-0.14917	0.0083005	-32.094	189.409	798.52072	-1.1296	0.55493	-0.19043	63.6662	-50.665	1610.232	-2.7832	1.4414	-0.62695	-33.8939	20.0128	18.9304	-0.12207	-0.011475	0.1062	-12.1	86.365	166.5348	-0.12939	0.16357	-0.021484
1.55	33.238	30.3142	14.3497	0.1167	0.042969	-0.0087891	35.1351	-5.378	73.7896	-0.020996	0.018555	-0.040039	-0.455000000000002	0.281000000000001	12.96056	0.11328	-0.15234	0.015625	-11.208	198.0244	764.8973	-1.0879	0.54297	-0.17383	22.074	-29.748	1549.9586	-2.8025	1.4563	-0.61451	-18.799	39.002	27.46	-0.11768	-0.0063477	0.10498	9.004	118.614	155.796	-0.11841	0.14917	-0.0043945
1.552	27.144	4.6772	19.1519	0.10411	0.052246	-0.011621	-12.927	-17.225	57.211	-0.0078126	0.0093751	-0.057422	12.135	20.8867	10.0582	0.11426	-0.16211	0.02002	-32.779	210.7658	727.754	-1.0254	0.52637	-0.15918	17.129	-56.0324	1563.619	-2.8105	1.4648	-0.60352	-42.9751	28.6223	14.7101	-0.1084	-0.0043945	0.095703	-15.511	111.768	149.5693	-0.10742	0.13428	0.00097656
1.554	19.05	30.7193	34.1109	0.083692	0.066895	-0.0025391	23.3377	-34.365	85.0434	0.0012695	0.00058592	-0.075683	-9.39	41.099	-19.2491	0.11426	-0.15723	0.02832	-37.476	160.558	723.883	-1.0034	0.51416	-0.1499	56.169	-3.436	1544.868	-2.8145	1.458	-0.58447	-14.51	-18.3109	24.7104	-0.10205	-0.0014648	0.093262	6.657	72.368	140.2918	-0.084473	0.11279	0.0068359
1.556	6.946	47.317	23.913	0.061035	0.079395	0.0025391	46.5997	-32.754	105.6765	0.0098631	-0.012305	-0.097171	-13.086	17.874	12.6213	0.11914	-0.16113	0.025879	14.962	204.8603	695.2831	-0.94727	0.49023	-0.13867	12.7157	-29.7296	1526.1456	-2.8047	1.4512	-0.57813	-31.974	38.7195	-2.09952	-0.09375	-0.0078125	0.082031	-48.41326	101.2939	90.8299	-0.067383	0.11035	0.0078125
1.558	5.458	20.2979	44.0893	0.03291	0.094823	0.012109	22.516	-65.739	123.021	0.013086	-0.022851	-0.12598	-34.566	63.006	18.8156	0.12231	-0.16577	0.031494	-21.489	173.0344	644.8586	-0.90308	0.47046	-0.12818	64.8959	-17.0327	1545.5964	-2.7813	1.4336	-0.55859	-34.9313	21.1609	-7.3084	-0.079834	-0.0080566	0.077881	-20.516	56.3518	76.3697	-0.03418	0.095215	0.012207
1.56	15.024	36.906	51.3193	0.0048828	0.1123	0.023926	54.058	-87.25078	180.6193	0.013184	-0.028809	-0.15283	-36.8836	26.6898	26.8999	0.12451	-0.16699	0.037598	-13.042	143.3787	653.715	-0.86523	0.45215	-0.11865	53.258	53.004	1497.114	-2.7615	1.4104	-0.53931	-13.304	17.5894	11.4853	-0.068359	-0.014648	0.068848	18.057	60.8914	61.366	-0.0073243	0.08667	0.016114
1.562	-15.311	-8.942	40.852	-0.022851	0.13516	0.030664	21.446	-66.3985	194.807	0.010449	-0.028027	-0.18193	-12.096	-3.9001	17.6805	0.12012	-0.16797	0.044434	1.264	188.882	616.822	-0.81055	0.42969	-0.1001	4.994	-0.606000000000002	1485.822	-2.7378	1.3911	-0.53076	-23.542	46.558	11.8883	-0.055176	-0.020508	0.056641	5.282	76.972	34.0073	0.019531	0.074707	0.019531
1.564	-10.649	-35.084	84.1802	-0.05127	0.15576	0.039453	11.915	-36.318	274.9464	-9.768e-05	-0.020801	-0.2042	-49.4447	37.85507	-0.645	0.11914	-0.16943	0.048828	-10.922	148.016	599.8377	-0.7876	0.41943	-0.097656	20.708	29.4164	1515.0131	-2.6948	1.3579	-0.51416	1.765	-9.0525	28.0903	-0.045898	-0.02832	0.05127	46.8694	22.2044	29.7283	0.053711	0.0625	0.015625
1.566	-5.528	-7.642	89.2644	-0.079785	0.17764	0.04375	42.289	26.697	381.094	-0.025879	-0.012207	-0.22178	-36.9892	-4.605	24.1332	0.11133	-0.17139	0.058594	40.7684	173.565	572.2745	-0.73584	0.39111	-0.089355	-1.463	26.003	1499.74447	-2.6758	1.3379	-0.50781	18.665	13.7929	24.4659	-0.029785	-0.036621	0.034668	25.365	48.218	17.4384	0.070801	0.05127	0.01416
1.568	-59.367	-24.867	149.098	-0.11494	0.20566	0.057422	4.054	77.597	515.5413	-0.058691	-0.00019532	-0.23652	-23.684	23.9788	39.816	0.10303	-0.1748	0.063232	9.584	174.145	514.3477	-0.69971	0.37745	-0.075683	1.196	-29.16951	1536.8565	-2.6401	1.2993	-0.49414	-1.096	24.897	32.2865	-0.021729	-0.041992	0.022949	-5.997	43.319	27.6983	0.098633	0.032715	0.015137
1.57	-27.0616	-7.674	244.0457	-0.14404	0.22656	0.062012	13.052	84.3493	633.736	-0.098145	0.018555	-0.24268	-49.1193	39.8185	12.9304	0.09668	-0.17529	0.067871	-36.7638	141.2155	498.6037	-0.65332	0.35352	-0.074219	24.2645	20.7936	1534.426	-2.6133	1.2729	-0.48413	7.413	-12.2567	56.8724	-0.014648	-0.048828	0.013672	57.9314	32.7748	45.4645	0.11303	0.016113	0.014892
1.572	-48.477	-27.564	295.329	-0.18056	0.24717	0.058203	3.992	106.666	681.13	-0.14912	0.029981	-0.2542	-32.0727	3.743	5.14085	0.090332	-0.17773	0.07373	0.109000000000002	182.3115	468.178	-0.59863	0.32324	-0.064453	-32.1431	-23.259	1503.0235	-2.5815	1.2456	-0.4751	22.202	13.4571	48.46678	-0.00048828	-0.052246	-0.0068359	44.913	74.513	47.9179	0.12402	0.0014648	0.016113
1.574	-94.652	-89.3795	383.896	-0.21738	0.27314	0.05166	-35.611	71.618	731.9729	-0.20049	0.044238	-0.2669	-14.579	46.95	13.0105	0.084961	-0.17529	0.072754	-39.1377	155.4049	450.9777	-0.57031	0.30859	-0.060059	-51.4218	-20.2654	1511.234	-2.5371	1.2109	-0.46289	6.294	-27.883	37.852	0.00048828	-0.054199	-0.010742	17.108	39.272	48.7169	0.13672	-0.018066	0.02002
1.576	-88.758	-74.706	483.5987	-0.26464	0.29775	0.050488	0.088000000000001	12.747	837.332	-0.26845	0.058301	-0.28447	-25.403	20.9025	34.348	0.072266	-0.17285	0.080566	-16.366	132.218448	425.211	-0.52051	0.2793	-0.055176	-67.095	47.5395	1459.6683	-2.5151	1.1899	-0.45947	27.194	-46.891	52.6818	0.0068359	-0.066895	-0.037598	14.474	38.6776	37.11	0.13965	-0.023926	0.021484
1.578	-178.974	-89.636	588.984	-0.31621	0.32129	0.036914	-19.329	-32.246	904.882	-0.34463	0.076953	-0.31494	0.364000000000001	6.24579	47.079	0.063233	-0.17432	0.084473	-18.0388	155.6578	388.383	-0.48242	0.25952	-0.050781	-79.428	-1.814	1429.25	-2.4565	1.1577	-0.44971	27.5574	-9.195	64.406	0.001709	-0.077637	-0.059814	-41.40431	39.619	16.3772	0.14209	-0.041992	0.02832
1.58	-158.323	-102.387	643.328	-0.37891	0.35156	0.029297	1.028	-96.66	913.928	-0.43945	0.10547	-0.34473	-10.611	53.683	5.1102	0.058105	-0.16992	0.081055	-59.1514	107.573	359.9387	-0.4502	0.24121	-0.047852	-48.5491	33.4756	1425.04718	-2.405	1.133	-0.44384	10.8578	-59.7455	114.398	-0.003418	-0.081543	-0.081055	-12.709	-4.4457	13.386	0.14161	-0.061279	0.029053
1.582	-96.812	-66.578	678.581	-0.45068	0.38194	0.022265	38.764	-114.85	849.574	-0.54277	0.14746	-0.36192	0.905000000000001	22.0911	2.5336	0.043457	-0.16992	0.081543	-12.945	128.2409	324.234	-0.40869	0.21631	-0.040527	-78.449	50.6455	1385.623	-2.3511	1.1157	-0.43994	34.81	-45.004	144.743	-0.023926	-0.083984	-0.11084	-17.066	16.2952	16.7918	0.14551	-0.074219	0.029785
1.584	-128.114	-95.8607	686.597	-0.53174	0.40869	0.01709	-19.2721	-131.834	784.578	-0.66553	0.20596	-0.36123	18.351	30.442	28.4569	0.039551	-0.16504	0.085449	-9.945	145.436	291.041	-0.38525	0.20996	-0.036621	-82.299	19.532	1386.435	-2.2754	1.0781	-0.43359	25.681	-46.822	147.271	-0.038086	-0.084961	-0.12207	-27.245	-0.870000000000001	-0.1731	0.14307	-0.090332	0.033691
1.586	-66.522	-106.5598	738.465	-0.62627	0.43486	0.011231	-13.7158	-167.231	776.787	-0.81358	0.26416	-0.34405	5.797	29.851	16.980782	0.027344	-0.1582	0.085938	-25.7686	116.311	273.791	-0.34766	0.19141	-0.031738	-49.30106	110.034	1360.181	-2.2319	1.0522	-0.42529	31.321	-88.347	234.786	-0.079102	-0.078125	-0.13525	3.541	-25.012	5.7866	0.14258	-0.095703	0.035156
1.588	-9.565	-93.328	780.212	-0.73486	0.4542	0.00625	-32.3858	-117.413	734.3284	-0.97773	0.33369	-0.30849	26.722	-1.7859	22.4945	0.016358	-0.15283	0.088134	18.745	157.202	253.236	-0.31934	0.17847	-0.02417	-93.927	99.747	1329.5897	-2.1582	0.98828	-0.41016	30.154	-10.2636	315.4233	-0.12231	-0.075684	-0.1499	-33.182	22.9625	-11.925	0.13965	-0.10596	0.041016
1.59	-25.22	-93.957	818.172	-0.85742	0.47852	4.4409e-14	-17.0018	-73.41552	758.295	-1.1538	0.41113	-0.24365	17.67	30.8033	-1.2258	0.0024414	-0.14209	0.084961	-27.5548	128.74	233.2858	-0.29346	0.16357	-0.018066	-46.4258	101.986	1325.256	-2.1025	0.94092	-0.39648	18.176	28.8858	425.016	-0.17188	-0.072266	-0.16455	-31.3645	-4.348	21.599	0.14258	-0.11524	0.043457
1.592	11.27	-28.4823	875.503	-0.98952	0.50166	-0.0049805	22.7741	-73.3891	813.017	-1.3671	0.49014	-0.18447	39.1965	19.8397	25.0646	-0.010742	-0.13672	0.084961	-23.142	118.782	239.2789	-0.26465	0.13916	-0.0068359	-15.41	162.394	1265.583	-2.0488	0.9043	-0.39746	23.789	64.615	542.51	-0.25928	-0.064941	-0.19238	-3.835	16.572	32.5653	0.14355	-0.12061	0.04248
1.594	28.701	-21.026	888.474	-1.1394	0.52461	-0.026465	-63.0117	-57.191	853.518	-1.6405	0.58838	-0.15801	52.1863	-18.17746	52.173	-0.018555	-0.12549	0.081055	-19.231	154.076	230.754	-0.24854	0.1333	-0.0019531	-56.2828	107.9698	1242.015	-1.9663	0.87061	-0.38525	4.061	116.424	585.75	-0.30811	-0.065918	-0.2124	-15.405	25.3212	33.00484	0.14307	-0.1333	0.041016
1.596	14.569	-75.112	913.2575	-1.3078	0.56211	-0.051465	-91.726	-109.731	877.939	-1.9229	0.7208	-0.13848	12.233	18.5001	23.1854	-0.02832	-0.11035	0.078613	-26.9725	108.102	234.621	-0.2251	0.1123	0.00048828	6.319	157.688	1246.87	-1.9233	0.85596	-0.37646	-26.655	47.4818	662.9475	-0.43164	-0.045898	-0.25879	-0.991999999999997	-8.2282	29.865	0.14648	-0.13818	0.04248
1.598	60.4429	-80.202	916.4101	-1.4916	0.61113	-0.074805	-18.364	-109.845	885.622	-2.1767	0.85449	-0.13906	36.1791	-5.9699	7.3066	-0.037597	-0.095461	0.074951	-7.856	116.9821	204.25432	-0.20655	0.098144	0.0097658	1.223	169.033	1204.9169	-1.8394	0.82861	-0.35889	-24.515	39.6433	760.464	-0.54102	-0.025879	-0.26684	-21.694	35.386	8.157	0.15234	-0.14941	0.04541
1.6	35.912	-129.4297	967.2287	-1.6714	0.67432	-0.09375	6.549	-61.24	903.425	-2.3667	0.98877	-0.16895	28.596	1.7288	10.6058	-0.045898	-0.083984	0.074707	-44.6954	102.7298	153.5993	-0.18604	0.090332	0.018066	2.823	112.569	1218.79	-1.7744	0.80175	-0.35693	-28.346	10.71	828.068	-0.66162	0.0053711	-0.28076	-43.5048	32.63736	4.9432	0.15235	-0.15918	0.041504
1.602	57.416	-124.239	1051.582	-1.8521	0.74473	-0.11885	45.171	-81.89	965.728	-2.4094	1.1203	-0.20254	5.633	22.297	18.0675	-0.052246	-0.061035	0.072266	-51.0944	66.688	148.7729	-0.16699	0.073242	0.032715	54.30834	146.374	1184.288	-1.7065	0.77588	-0.34326	-4.455	-48.309	885.03	-0.85107	0.056641	-0.28174	-23.159	1.419	10.8431	0.16064	-0.16748	0.040527
1.604	61.0214	-87.181	1069.509	-2.0156	0.8169	-0.1459	75.6364	-59.67	951.3172	-2.3219	1.2365	-0.24336	12.444	-9.1655	34.842	-0.052734	-0.049316	0.065918	-9.855	97.3301	139.872	-0.1543	0.067383	0.037109	0.808	80.6615	1142.0972	-1.6245	0.74072	-0.3291	-3.526	-26.91	828.733	-0.95068	0.085938	-0.271	-28.371	39.523	-1.514	0.16016	-0.17969	0.02832
1.606	53.837	-115.667	1082.1827	-2.1456	0.88994	-0.17246	39.149	-117.527	908.35	-2.1215	1.3291	-0.29336	3.29	34.396	9.7349	-0.054688	-0.02832	0.058105	-14.83	82.509	123.99099	-0.1377	0.055664	0.050293	57.1435	87.0396	1149.1598	-1.5879	0.7168	-0.31934	-27.066	-78.76	782.356	-1.1753	0.15283	-0.22607	-29.8547	-10.72539	14.6111	0.15967	-0.18359	0.026855
1.608	110.17326	-136.339	1075.016	-2.2219	0.95938	-0.19795	64.9427	-234.6862	933.221	-1.8661	1.3964	-0.34736	-10.27	19.7584	-9.3857	-0.052002	-0.018311	0.05127	7.652	64.435	111.37491	-0.12085	0.05542	0.050782	69.422	151.7385	1109.9281	-1.5117	0.67188	-0.29883	-3.79933	-144.295	773.491	-1.4155	0.21924	-0.16553	3.835	3.0598	13.9498	0.15869	-0.19385	0.018555
1.61	111.862842	-165.541	1059.913	-2.2422	1.0264	-0.21338	31.076	-274.086	1014.433	-1.6284	1.4263	-0.40771	-7.106	-6.07399	13.1053	-0.052246	-0.003418	0.04541	8.357	85.244	82.3369	-0.10107	0.051758	0.055176	30.119	100.823	1087.166	-1.4617	0.6355	-0.281	-18.6612	-86.444	738.004	-1.5586	0.26416	-0.13184	-5.899	10.3943	4.624	0.15918	-0.20117	0.013672
1.612	137.1479	-207.524	1163.914	-2.2116	1.0704	-0.23799	4.818	-330.893	1095.627	-1.4603	1.3855	-0.46397	-26.212	39.241	13.443	-0.04834	0.010254	0.037598	-21.6	55.65	84.15134	-0.070313	0.043945	0.057129	68.2837	151.7707	1072.5815	-1.4141	0.60352	-0.26123	-38.334	-97.425	795.635	-1.8823	0.36963	-0.077637	34.573	-12.1559	6.4131	0.15918	-0.20361	0.0087891
1.614	152.836	-178.184	1232.3656	-2.1591	1.0927	-0.27178	26.546	-334.234	1170.267	-1.3582	1.2683	-0.49765	-33.3463	2.704545	9.459	-0.044922	0.018066	0.031738	20.995	84.573	89.102	-0.057617	0.041504	0.060059	44.81	158.5802	1019.87522	-1.3491	0.56689	-0.24561	-4.535	-49.749	847.9385	-2.1455	0.48828	-0.063721	37.868	31.177	11.6762	0.15234	-0.20898	-0.0029297
1.616	95.6833	-212.342	1263.6628	-2.0845	1.0844	-0.31201	-60.7936	-283.84	1164.73	-1.3168	1.0707	-0.50117	-15.833	23.0584	10.12	-0.041504	0.025391	0.026367	11.623	99.608	66.0754	-0.020508	0.03418	0.061035	36.928	130.3072	1006.7837	-1.3184	0.54395	-0.2373	-61.358	-28.12734	877.098	-2.3862	0.61768	-0.060547	0.151	23.3035	-4.5158	0.15283	-0.22217	-0.0063477
1.618	81.9813	-254.917	1324.031	-2.0054	1.043	-0.34346	-69.5581	-311.49	1201.476	-1.3123	0.83769	-0.48926	-47.2221	46.767	-10.6191	-0.035645	0.037353	0.016845	-6.209	69.631	66.0775	-0.0012207	0.029541	0.06836	59.5985	210.028	985.557	-1.2505	0.51611	-0.22656	-69.962	-117.398	909.563	-2.6133	0.80859	-0.1123	47.6652	4.6291	1.3343	0.13428	-0.23145	-0.01123
1.62	45.487	-249.095	1332.253	-1.9292	0.96631	-0.35986	-43.674	-228.645	1236.447882	-1.3354	0.61182	-0.47803	-36.9632	-6.25614	10.216034	-0.024902	0.045898	0.010742	23.651	86.064	49.08651	0.021484	0.010742	0.061523	20.832	195.583	953.314	-1.1975	0.49219	-0.21631	-43.8566	-112.259	927.091	-2.6563	0.90918	-0.14307	-3.939	43.576	-8.6737	0.12549	-0.19141	-0.026856
1.622	-1.966	-222.64613	1360.6859	-1.8597	0.85127	-0.36436	-26.575	-132.167	1280.333	-1.3895	0.42793	-0.44971	-22.993	21.8802	5.0679	-0.013672	0.046387	-0.0048828	-41.7306	46.3306	27.5446	0.054199	-0.0063477	0.062012	43.161	184.051	934.768	-1.1421	0.46924	-0.21143	-9.993	-121.58	957.072	-2.5601	1.1001	-0.18213	15.2034	7.2725	10.8252045	0.13428	-0.18164	-0.017578
1.624	50.513	-162.567	1411.44145	-1.8022	0.71806	-0.36279	39.589	-121.287	1352.754	-1.4608	0.29864	-0.42979	-47.4669	15.953	0.44063	-0.00097656	0.04834	-0.013184	-16.19	28.1475	48.085	0.067871	-0.015625	0.064941	24.121	208.569	866.7757	-1.0688	0.42725	-0.19531	42.758	-111.99	1021.346	-2.3628	1.2133	-0.2251	39.1947	17.75282	36.411	0.13477	-0.18457	-0.010254
1.626	9.556	-99.903	1402.484	-1.757	0.58994	-0.36436	25.317	-55.979	1346.01	-1.5632	0.2252	-0.40635	-27.831	-2.63	-1.0118	0.019531	0.049316	-0.032715	4.86	63.056	31.674	0.087891	-0.040039	0.063965	-21.766	138.035	823.772	-1.0156	0.39844	-0.18335	34.709	-50.53	1022.6834	-2.1328	1.3047	-0.27539	1.893	30.269	25.061	0.13184	-0.18213	-0.014648
1.628	-10.093	-99.295	1420.885	-1.7242	0.47109	-0.36563	55.3381	-67.458	1351.768	-1.6913	0.22412	-0.39043	-20.458	41.2225	3.9026	0.03418	0.04541	-0.045654	-7.64	27.321	18.9686	0.099365	-0.052734	0.068848	-0.581000000000003	189.992	797.7113	-0.96436	0.37158	-0.17334	13.762	-123.384	1007.4868	-1.8491	1.3794	-0.34912	-4.943	-0.6609	21.3883	0.11914	-0.18457	-0.015625
1.63	26.892	-81.652	1432.7647	-1.7109	0.38281	-0.35547	113.368	-76.28	1359.777	-1.8301	0.28564	-0.37939	-10.705	-10.6786	24.87916	0.052246	0.044434	-0.060059	34.305	21.2328	36.3011	0.11279	-0.067383	0.074707	-33.385	200.347	773.6373	-0.89746	0.33496	-0.15869	32.123	-191.562	1016.087	-1.7402	1.3828	-0.38184	-6.19	28.33525	-9.0591	0.11133	-0.18506	-0.020263
1.632	-0.480999999999995	-67.765	1438.3387	-1.72	0.329	-0.34678	92.226	-23.29	1345.172	-1.9619	0.42178	-0.36982	-19.722	0.61761	14.223	0.068848	0.038086	-0.074707	5.317	22.0421	-7.164	0.12305	-0.080078	0.072266	-40.942	177.177	761.3296	-0.86475	0.31787	-0.15381	29.1031	-223.107	1066.645	-1.5957	1.2773	-0.42578	-9.714	24.567	-17.4818	0.10254	-0.17676	-0.02002
1.634	10.917	-76.839	1490.452	-1.7559	0.30049	-0.33282	54.568	-64.963	1357.495	-2.0847	0.59053	-0.37764	-5.327	43.428	5.337	0.081543	0.038086	-0.083984	-4.699	-8.5606	6.6118	0.13135	-0.086914	0.077637	-16.013	216.736	720.438	-0.80029	0.28613	-0.14209	52.7902	-289.97	1179.5658	-1.5484	1.0967	-0.44018	21.869	12.145	-9.4764	0.10107	-0.15771	-0.023438
1.636	11.502	-52.546	1485.428	-1.8152	0.29893	-0.32383	-3.336	-48.883	1375.733	-2.1796	0.76904	-0.39209	7.585	12.09394	17.588	0.098633	0.032227	-0.10596	28.544	16.2525	17.1858	0.14844	-0.10156	0.081543	-61.3402	147.5143	688.734	-0.75146	0.26733	-0.13696	-3.133	-256.865	1216.137	-1.5273	0.87305	-0.43213	2.963	61.677	-12.788	0.098633	-0.15234	-0.025391
1.638	-55.016	-65.79	1481.996039	-1.8964	0.33213	-0.3167	-54.751	-46.8755	1386.237	-2.2454	0.92803	-0.39736	3.54	37.6356	51.147	0.10815	0.025147	-0.11914	-17.611	2.53	10.2949	0.15772	-0.11109	0.087402	-33.484	133.4229	697.51	-0.70117	0.24854	-0.12793	-54.4031	-241.124	1204.736	-1.5249	0.57275	-0.40186	-13.173	17.7788	-4.7059	0.10693	-0.13477	-0.027344
1.64	-35.619	-78.119	1531.1459	-1.9897	0.38232	-0.31348	-18.204	-128.37	1465.325	-2.2925	1.061	-0.3999	17.511	-2.992	50.559	0.12012	0.017578	-0.13477	4.802	1.938	39.777	0.1709	-0.12109	0.092285	-32.934	170.169	645.727	-0.63721	0.21973	-0.12109	-58.604	-274.213	1235.115	-1.5386	0.44385	-0.38623	-1.315	32.8184	5.99036	0.11402	-0.12573	-0.029785
1.642	-14.996	-55.262	1546.5767	-2.083	0.4582	-0.3127	22.269	-92.677	1489.242	-2.3292	1.1563	-0.41914	16.951	-44.0091	50.8359	0.12451	0.003418	-0.16943	0.789999999999999	33.956	23.2285	0.18848	-0.14063	0.095215	-52.281	119.07416	613.1495	-0.604	0.2085	-0.11182	-33.178	-181.886	1239.7664	-1.605	0.229	-0.37207	-41.2714	43.665	3.8581	0.11719	-0.11768	-0.023438
1.644	-35.228	-103.7698	1585.2768	-2.1848	0.54258	-0.33106	43.787	-125.376	1532.479	-2.3711	1.2336	-0.44248	9.171	5	39.3492	0.12305	0.0019531	-0.18311	-50.55051	9.26636	26.159	0.19482	-0.1416	0.10059	-4.546	161.303	570.4258	-0.54834	0.17627	-0.099121	-0.631999999999998	-141.9351	1297.7152	-1.6811	0.12305	-0.35474	-16.42	3.112	36.04749	0.12207	-0.1001	-0.02832
1.646	-10.967	-106.0148	1607.166	-2.2813	0.63438	-0.33731	66.521	-153.772	1573.262	-2.409	1.2754	-0.45147	19.66385	-38.385	83.50551	0.11523	-0.0019531	-0.20996	-3.201	21.005	35.769	0.20508	-0.15234	0.10791	-14.504	150.5332	521.189	-0.50268	0.15356	-0.091797	33.197	-119.64	1369.7074	-1.7808	0.064453	-0.34229	-10.375	41.054	34.2553	0.12305	-0.093262	-0.026367
1.648	-28.404	-78.358	1578.019	-2.3761	0.72588	-0.33994	33.363	-85.41	1526.015	-2.45	1.2891	-0.47813	36.1755	-48.279	130.9701	0.099122	6.9389e-15	-0.22876	-29.595	37.699	9.494	0.21875	-0.15918	0.10572	-10.253	114.8865	512.9384	-0.46045	0.12744	-0.078613	28.166	-39.22	1362.058	-1.937	0.078613	-0.32959	-38.4564	27.9676	25.8524	0.12744	-0.07959	-0.025391
1.65	-29.1498	-99.624	1606.15	-2.4722	0.81982	-0.34326	65.6774	-120.0098	1518.356	-2.4819	1.2837	-0.49561	23.3	-39.231	120.0492	0.077148	0.0019531	-0.24365	-27.82	4.7904	21.2254	0.22705	-0.16602	0.10645	31.133	163.119	470.4738	-0.41162	0.095703	-0.063965	48.3097	-77.174	1367.431	-2.0176	0.12939	-0.32715	-19.878	9.1676	11.01306	0.12402	-0.065918	-0.024658
1.652	19.711	-71.989	1616.183	-2.5621	0.91093	-0.34668	123.996	-82.691	1523.658	-2.4964	1.2548	-0.50928	36.089	-97.05615	164.4689	0.029297	0.0083008	-0.26953	16.038	29.4989	-1.59511	0.23438	-0.17188	0.10498	21.043	116.911	453.1985	-0.39014	0.079102	-0.062988	68.9683	-50.992	1372.544	-2.1714	0.28369	-0.34229	-52.3889	50.582	-7.676	0.12305	-0.052246	-0.019043
1.654	21.7617	-70.6788	1588.116	-2.6477	0.99532	-0.34551	90.89	-34.199	1475.085	-2.4878	1.2116	-0.52217	25.8	-48.593	210.1211	-0.016601	0.01709	-0.27929	-34.3372	7.4004	-5.5911	0.23877	-0.17334	0.098633	21.369	134.5798	427.2943	-0.34424	0.053711	-0.056641	67.673	-13.095	1344.266	-2.2575	0.43384	-0.35864	-23.478	12.7586	10.6714	0.1167	-0.037598	-0.021973
1.656	69.1456	-95.455	1619.334	-2.7211	1.068	-0.35097	79.4501	-95.008	1489.763	-2.4612	1.1624	-0.53858	20.31	-27.738	283.316	-0.06543	0.025879	-0.29248	1.769	-2.4499	22.5083	0.23926	-0.18115	0.090332	36.046	168.2801	367.9613	-0.30762	0.032959	-0.048584	68.783	-89.629	1378.912	-2.3262	0.5791	-0.37354	12.899	20.3149	13.3034	0.11768	-0.027344	-0.021484
1.658	58.1577	-26.8646	1595.683	-2.7843	1.1293	-0.35401	44.009	-25.111	1479.531	-2.4189	1.1165	-0.55488	31.987	-11.18555	373.254	-0.14404	0.035645	-0.32471	22.441	23.2917	3.4843	0.23657	-0.18115	0.074951	19.887	123.0002	337.226	-0.27734	0.016602	-0.045898	33.987	-42.286	1366.3712	-2.3765	0.75635	-0.39209	-12.725	27.7004	11.0763	0.11328	-0.0053711	-0.015137
1.66	29.53358	-19.2886	1569.261	-2.8354	1.1782	-0.35693	-32.317	-3.235	1457.2338	-2.3662	1.0762	-0.56445	9.688	87.54	440.06452	-0.18506	0.036621	-0.34229	-12.479	5.467	16.6933	0.22949	-0.18018	0.062012	78.4861	158.05	298.7992	-0.2334	-0.0087891	-0.046387	-13.249	-77.005	1363.4	-2.3887	0.83008	-0.40625	0.893000000000001	-7.5053	18.6955	0.11401	0.0061035	-0.013672
1.662	43.3155	6.2148	1563.5393	-2.876	1.2137	-0.34697	-19.814	1.6273	1490.0831	-2.3121	1.043	-0.57696	-10.935	77.1047	515.079	-0.28369	0.052246	-0.38232	0.561	19.78499	20.1997	0.22803	-0.18115	0.04834	55.3715	142.5275	271.095	-0.21289	-0.020996	-0.048828	0.309000000000001	-125.302	1450.83574	-2.4082	0.95703	-0.43164	-6.022	18.2593	28.248	0.11475	0.021484	-0.012695
1.664	29.551	58.668	1522.3973	-2.9094	1.2451	-0.34082	14.231	84.286	1439.5403	-2.2687	1.011	-0.58711	-14.339	68.2705	602.726249	-0.37427	0.075439	-0.40478	-18.174	28.7843	-3.280752	0.2168	-0.18359	0.039551	50.829	105.6763	278.804	-0.1709	-0.045898	-0.04834	19.692	-69.355	1489.1746	-2.4265	1.0227	-0.44604	-13.305	20.0233	29.4829	0.10986	0.038086	-0.0058594
1.666	24.561	0.7729	1567.497	-2.9364	1.274	-0.33965	1.872	37.231	1420.4234	-2.234	0.98711	-0.59141	-40.5561	70.628	641.593	-0.47607	0.1167	-0.42236	-13.692	-4.0871	23.148	0.19775	-0.18408	0.025879	67.8725	167.033	244.563	-0.14405	-0.060059	-0.046387	52.61	-133.384	1510.1543	-2.4434	1.0742	-0.4707	12.826	12.3455	31.852	0.10547	0.05542	-0.00048826
1.668	71.6716	27.0364	1551.552	-2.9549	1.2947	-0.33438	12.68	41.543	1436.711	-2.2081	0.96104	-0.59677	-30.974	16.9291	722.597	-0.62842	0.1748	-0.42432	22.147	25.5151	29.019	0.18066	-0.18018	0.003418	38.764	134.148	240.786	-0.12451	-0.075195	-0.047363	72.511	-118.344	1514.32	-2.4746	1.1133	-0.49414	14.167	55.686	22.097	0.10205	0.074707	-0.00097656
1.67	37.2727	27.7326	1491.558	-2.9707	1.3125	-0.3252	-29.805	70.6	1393.55008	-2.1895	0.93945	-0.60352	-8.176	32.756	775.975	-0.71387	0.20703	-0.41455	-12.527	7.3806	15.6485	0.16943	-0.17822	-0.0024414	63.8087	126.606	240.1381	-0.099121	-0.098633	-0.050293	60.193	-71.7925	1462.641	-2.4883	1.1133	-0.50293	4.66	8.3956	10.4593	0.095703	0.09082	0.0029297
1.672	51.7198	-10.36	1500.7286	-2.9744	1.3314	-0.3209	11.305	-2.89687	1406.7426	-2.1691	0.92061	-0.60225	-7.623	2.277	773.57	-0.90186	0.27686	-0.39209	19.26	-14.9227	25.4623	0.14746	-0.1665	-0.015625	49.383	131.112	207.1274	-0.083984	-0.10352	-0.04541	74.198	-119.037	1480.354	-2.4863	1.0996	-0.52246	24.436	9.23113	25.597	0.091797	0.10596	0.0043945
1.674	32.9552	47.8739	1479.5826	-2.9702	1.3415	-0.31113	65.827	53.472	1435.129	-2.1553	0.90342	-0.59795	1.111	-58.277	737.854	-1.0474	0.33935	-0.3628	3.037	18.9408	3.9645	0.12818	-0.15576	-0.025146	13.126	75.4542	194.256	-0.066406	-0.12158	-0.039551	112.1385	-37.872	1481.445	-2.4741	1.0757	-0.53247	3.291	23.0192	13.4844	0.087402	0.12842	0.0087891
1.676	-9.982	-2.30268	1466.257	-2.9581	1.3443	-0.30605	38.331	21.058	1421.311	-2.1417	0.88506	-0.59209	-13.849	-48.501	667.542	-1.1953	0.4043	-0.33252	-30.709	3.0879	2.1231	0.11182	-0.13721	-0.03418	37.511	118.634	166.4789	-0.052978	-0.13135	-0.042236	112.4523	-37.277	1479.617	-2.4492	1.0371	-0.54102	27.378	-12.5832	15.7047	0.080566	0.14527	0.013428
1.678	54.733	0.6005	1480.29585	-2.9466	1.3398	-0.29971	64.947	-30.722	1430.556	-2.1278	0.87041	-0.59189	-21.3921	-111.474	657.5063	-1.4219	0.49609	-0.28809	32.023	23.7369	5.4967	0.089844	-0.11914	-0.042969	-1.672	116.23	148.061	-0.041992	-0.14063	-0.038086	65.573	-71.422	1520.617	-2.3984	0.98633	-0.54883	28.293	14.2661	16.532	0.071777	0.1665	0.021484
1.68	-11.351	25.7879	1423.2096	-2.9214	1.3345	-0.29443	43.349	32.1367	1377.257	-2.1113	0.8584	-0.59082	5.14458	-114.218	704.2964	-1.5483	0.56494	-0.28662	2.685	38.868	-6.634028	0.084473	-0.10645	-0.053223	-28.645	76.4252	167.9783	-0.030273	-0.14795	-0.037109	45.106	10.45	1485.982681	-2.3726	0.95752	-0.55029	4.195	-2.0463	10.1123	0.052734	0.18945	0.021973
1.682	-31.4296	-30.981	1448.02536	-2.8883	1.3234	-0.2875	32.856	-11.6798	1368.009	-2.0897	0.84853	-0.58643	-11.4144	-54.884	750.0551	-1.8218	0.7251	-0.29639	8.692	14.87	0.0310000000000006	0.075684	-0.084961	-0.05957	-1.962	107.543	145.6059	-0.025391	-0.15576	-0.034668	-4.081	-2.2828	1447.004	-2.3145	0.91406	-0.56055	15.739	-25.0775	9.8278	0.052246	0.19922	0.022949
1.684	13.076	37.1575	1464.351	-2.8483	1.3052	-0.2753	52.641	26.327	1392.793	-2.0613	0.83877	-0.58388	-23.5883	-93.86	790.5778	-1.9812	0.8518	-0.30981	18.826	36.082	3.906584	0.069336	-0.065673	-0.069824	-34.813	61.9086	137.8482	-0.013184	-0.15869	-0.028809	23.888	54.3802	1427.445	-2.2764	0.87891	-0.5625	-2.071	35.642	-10.8913	0.03418	0.22461	0.030762
1.686	-58.2386	58.8172	1436.829	-2.8026	1.2728	-0.26474	17.2	71.614	1343.902	-2.0347	0.82314	-0.57764	-34.6721	-78.11	807.128	-2.0991	0.97314	-0.32373	-31.1703	29.858	-8.7509	0.062988	-0.044922	-0.07373	-25.67	75.346	120.6684	-0.0058593	-0.16187	-0.028809	40.666	117.866	1402.182	-2.2476	0.84814	-0.56104	15.513	11.4068	6.7871	0.01587	0.24366	0.029785
1.688	-33.0773	41.853	1421.549	-2.7553	1.2244	-0.25254	36.612	6.129	1311.547	-2.0087	0.80967	-0.56963	-65.2173	-108.174	824.297	-2.1504	1.1191	-0.3457	-4.178	23.4701	18.9003	0.061035	-0.020996	-0.087891	-45.7415	107.763	102.491	0.00097656	-0.16797	-0.022461	19.129	30.824	1438.7872	-2.2222	0.81299	-0.56396	9.508	18.1368	34.5854	-0.0019531	0.26025	0.030273
1.69	-54.27	98.7593	1367.309	-2.7012	1.1699	-0.23633	6.03700000000001	49.761	1259.621	-1.9761	0.79443	-0.56006	-30.388	-150.2671	879.3817	-2.1367	1.1904	-0.35938	15.278	41.238	14.6492	0.059082	-0.0068359	-0.092773	-72.1874	77.687	106.8769	0.010742	-0.16797	-0.020996	18.375	57.8047	1436.906	-2.2144	0.79736	-0.56201	-55.04816	15.548	47.6404	-0.033691	0.27637	0.01123
1.692	-87.373	48.647	1330.215	-2.6403	1.1117	-0.21875	-21.037	55.368	1231.238	-1.9567	0.77998	-0.54932	19.609	-95.134	914.0833	-2.0405	1.3052	-0.38818	-23.887	17.2973	5.9001	0.058105	0.018555	-0.10205	-22.013	102.607	88.887	0.015137	-0.1709	-0.023438	0.00799999999999557	16.524	1406.74264	-2.1934	0.77539	-0.56055	-2.41	-55.4968	61.7877	-0.049316	0.28564	0.0019531
1.694	-37.697	89.0381	1317.8683	-2.5828	1.0629	-0.20537	36.601	64.3145	1228.2637	-1.9348	0.76836	-0.53575	39.9215	-107.801	950.7673	-1.948	1.3684	-0.4248	-2.83	22.6185	27.061	0.054687	0.0354	-0.10376	-55.8535	85.405	66.014	0.021973	-0.17188	-0.023438	39.316	-17.4863	1457.0482	-2.1804	0.75611	-0.56079	-12.124	-43.5124	90.4223	-0.10107	0.31055	-0.024902
1.696	-64.21207	145.749	1271.521	-2.5168	1.018	-0.19834	48.241	171.02	1160.464	-1.9125	0.75937	-0.52519	33.918	-133.989	973.5927	-1.8564	1.3945	-0.4502	-21.738	40.628	0.885800000000001	0.048828	0.049805	-0.11084	-51.3096	69.412	58.7949	0.029053	-0.17285	-0.020752	68.344	77.06976	1449.6126	-2.1675	0.74658	-0.55811	-54.601	-39.452	138.9433	-0.14551	0.32983	-0.045411
1.698	-47.557	103.485	1261.48	-2.4479	0.98457	-0.1958	50.485	133.793	1143.035	-1.8898	0.74648	-0.51055	30.877	-145.048	941.654	-1.7461	1.3516	-0.45508	-10.228	16.14502	10.0071	0.049805	0.068359	-0.1167	-11.014	106.17	44.148	0.032227	-0.17041	-0.013672	54.827	38.222	1428.54	-2.1421	0.74072	-0.5542	-25.969	-63.3548	239.283	-0.20605	0.35547	-0.074219
1.7	-10.007	145.928	1256.6	-2.373	0.95898	-0.20117	73.6578	145.197	1148.0521	-1.8691	0.73047	-0.49512	39.695	-215.503	962.305	-1.7148	1.2871	-0.45508	17.29	36.736	21.9375	0.046875	0.084961	-0.11768	-47.8841	64.613	54.829	0.037598	-0.17236	-0.010254	62.551	46.7098	1406.845	-2.1206	0.73486	-0.55518	-37.6153	-24.078	298.835	-0.30078	0.39063	-0.10498
1.702	-55.947	116.62	1214.318	-2.2981	0.93555	-0.20352	48.919	184.127	1116.1736	-1.8439	0.7252	-0.48614	58.056	-202.855	1019.789	-1.6787	1.0957	-0.4541	-33.1457	13.4906	9.0173	0.040527	0.10156	-0.12109	-28.954	70.519	67.574	0.036621	-0.17627	-0.012695	53.479	74.257	1370.4964	-2.0815	0.72314	-0.55225	-86.737	-74.496	396.252	-0.35547	0.4043	-0.11719
1.704	9.061	95.413	1200.2602	-2.2219	0.9082	-0.20479	58.2395	114.207	1114.8578	-1.8093	0.72041	-0.47647	38.1933	-182.1473	1064.093	-1.6707	0.91528	-0.44605	-0.581999999999997	0.507999999999999	13.1752	0.033692	0.12183	-0.11988	-12.354	78.572	56.623	0.039551	-0.17773	-0.0058594	54.205	-7.406	1386.692	-2.0557	0.71924	-0.54737	-105.444	-107.4869	501.956	-0.479	0.4248	-0.14893
1.706	12.178	157.205	1171.955	-2.15	0.87539	-0.20674	73.5352099	156.179	1092.48388	-1.7698	0.72471	-0.46631	-2.838	-236.808	1148.81	-1.6714	0.74951	-0.43604	6.715	30.8567	10.2064	0.030273	0.13428	-0.1167	4.031	20.264	61.382	0.035401	-0.18017	-0.0046387	78.8572	53.3509	1407.626	-2.0293	0.71094	-0.54102	-143.297	-67.342	515.2761	-0.59375	0.45239	-0.16968
1.708	-27.175	115.9422	1166.298	-2.0821	0.83789	-0.20196	12.976	116.7709	1074.687	-1.7287	0.72188	-0.45752	-32.022	-187.581	1168.703	-1.7031	0.5752	-0.42969	-43.7734	10.3137	15.272	0.027832	0.15723	-0.12061	44.5347	37.414	55.822	0.032715	-0.17822	-0.00048828	44.365	63.394	1372.11	-2.0137	0.68945	-0.52002	-135.76	-85.45	561.756	-0.72266	0.47949	-0.18066
1.71	19.88	132.8655	1165.363	-2.0176	0.80078	-0.19141	-20.444	54.934	1054.889	-1.6895	0.71484	-0.44531	-57.5299	-187.017	1191.202	-1.7266	0.5127	-0.42383	2.489	29.414	35.9521	0.022949	0.16357	-0.11475	1.907	17.819	31.078	0.022949	-0.17725	0.0048828	33.531	23.928	1348.072	-2.0078	0.67773	-0.5127	-81.67	-34.297	589.713	-0.90234	0.51563	-0.18945
1.712	-0.227999999999998	154.581	1111.072	-1.9597	0.76367	-0.18926	-31.73	132.942	1003.032	-1.6555	0.70469	-0.43457	-17.077	-181.558	1259.8055	-1.8042	0.43164	-0.41504	1.384	39.775	19.864	0.015625	0.18506	-0.11719	18.376	-1.0973	36.443	0.023438	-0.17383	0.0078125	20.812	104.069	1287.319	-1.9995	0.65576	-0.49658	-35.183	-21.865	637.785	-0.99951	0.5249	-0.19482
1.714	28.515	100.5319	1081.577	-1.9058	0.73682	-0.18271	-24.134	90.998	958.0697	-1.6219	0.69443	-0.42344	-5.187	-93.595	1280.064	-1.8796	0.43139	-0.40601	-14.659	22.5614	33.5868	0.010986	0.1958	-0.11743	43.87259	37.06	28.248	0.015137	-0.17041	0.015137	-15.665	70.139	1240.39	-1.9895	0.64722	-0.48071	-11.381	-61.961	700.452	-1.2012	0.50391	-0.19336
1.716	71.991	137.202	1062.869	-1.8448	0.71572	-0.1831	12.062	113.489	944.157	-1.5805	0.68974	-0.40586	-29.211	-107.172	1288.629	-1.959	0.46973	-0.39648	18.798	43.09	18.5212	0.012207	0.2085	-0.12207	32.4372	-7.7237	19.6399	0.010254	-0.16479	0.016113	39.7	112.79	1230.226	-1.979	0.63916	-0.4624	8.017	10.03419	710.448	-1.3377	0.49389	-0.19776
1.718	11.5	138.66	1033.9625	-1.7814	0.69942	-0.1791	-32.16	150.065	923.921	-1.5386	0.6874	-0.39209	16.078	-70.555	1304.4346	-2.0664	0.58789	-0.39697	-29.2101	25.662	8.534	0.0092773	0.21484	-0.12305	61.1984	-17.0844	41.416	0.0048828	-0.16113	0.025879	76.615	176.242	1192.476	-1.9526	0.63916	-0.44678	12.488	-2.551	749.9912	-1.4741	0.50439	-0.20264
1.72	35.9474	136.636	1034.211	-1.707	0.68262	-0.18701	-32.124	112.691	897.405	-1.4937	0.68213	-0.37354	26.9028	-21.376	1299.84199	-2.103	0.66064	-0.3999	-0.794	12.4582	31.47	0.0073242	0.2251	-0.12256	37.158	-8.9436	17.4927	-0.0043945	-0.15039	0.030273	63.243	105.143	1194.4187	-1.938	0.64307	-0.43896	18.66	3.717	769.7041	-1.6621	0.57129	-0.20898
1.722	47.3594	181.026	974.48005	-1.6365	0.66582	-0.19043	-4.981	188.832	879.554	-1.4516	0.68418	-0.36035	51.0058	-69.28	1357.216	-2.1636	0.80322	-0.41748	10.6	26.164	8.9062	0.0068359	0.23682	-0.11768	25.701	-26.225	22.60786	-0.0073242	-0.14746	0.04248	66.527	161.865	1189.269	-1.896	0.65479	-0.43115	-11	39.6328	777.778	-1.7573	0.62158	-0.21729
1.724	27.963	137.1985	951.1205	-1.5663	0.64189	-0.19053	13.354	180.398	857.23	-1.4098	0.67422	-0.34961	68.344	-49.581	1364.706	-2.1911	0.89819	-0.42798	-20.599	8.5034	11.93539	0.00097655	0.24292	-0.12207	54.7103	34.098	25.4584	-0.012207	-0.13672	0.046875	42.212	139.997	1162.58	-1.8582	0.6604	-0.41773	45.3878	-41.0749	792.471	-1.9253	0.76416	-0.25439
1.726	69.1622	156.795	911.6692	-1.4964	0.61572	-0.19131	16.687	159.324	832.7827	-1.3629	0.66484	-0.33242	41.484	-79.59	1353.1131	-2.2202	0.98389	-0.4458	21.731	5.4744	18.5051	-0.0029297	0.25049	-0.12158	15.542	29.827	6.1997	-0.019532	-0.13061	0.047607	56.855	97.8453	1154.5564	-1.8198	0.6626	-0.40527	71.225	-56.026	820.538	-2.0036	0.86841	-0.27075
1.728	42.888	192.024	874.6795	-1.4291	0.58692	-0.19053	-4.161	230.552	784.9311	-1.3159	0.64756	-0.32314	6.894	-129.3929	1393.30826	-2.2573	1.0649	-0.47021	4.138	14.9899	8.4337	-0.0092773	0.26123	-0.11963	9.811	7.6983	16.9793	-0.020508	-0.12598	0.054199	80.0967	155.578	1113.1428	-1.7656	0.65625	-0.38867	7.878	-80.727	858.677	-2.043	0.95801	-0.29346
1.73	34.828	166.048	853.766	-1.3667	0.55908	-0.18799	-17.8931	190.265	747.1873	-1.2637	0.63574	-0.31055	-30.453	-66.8121	1389.3382	-2.2769	1.1001	-0.48193	-7.299	-8.9904	33.967	-0.016113	0.26709	-0.12158	19.974	20.6173	-7.3748	-0.021973	-0.12305	0.058594	23.026	86.527	1092.5226	-1.7378	0.65283	-0.38184	32.487	-130.865	918.4157	-2.0288	1.0669	-0.30127
1.732	38.3131	209.626	815.714	-1.3061	0.53028	-0.18476	-38.4838	221.197	723.323	-1.2081	0.61885	-0.29883	-15.196	-87.51	1421.04	-2.332	1.1523	-0.50586	15.869	0.778	63.5329	-0.025391	0.27539	-0.12305	-15.085	-12.8596	-9.1845	-0.023438	-0.12646	0.058594	0.872999999999998	90.489	1071.915	-1.6816	0.63867	-0.36816	61.2787	-93.471	938.505	-1.9941	1.0938	-0.30664
1.734	-19.043	185.37	790.534	-1.2494	0.50176	-0.17891	-73.847	233.205	679.8017	-1.1585	0.6124	-0.28408	20.588	-88.139	1483.7214	-2.3653	1.1777	-0.52246	-0.882999999999999	-18.428	65.657	-0.039551	0.28076	-0.12622	-8.574	12.90062	5.0105	-0.019043	-0.12549	0.067383	-7.536	135.394	1023.761	-1.6382	0.62744	-0.35303	64.0932	-128.236	936.975	-1.8828	1.1211	-0.31445
1.736	4.728	139.6838	759.3876	-1.1838	0.47324	-0.17227	-44.5914	146.429	658.1463	-1.1113	0.60107	-0.27275	30.899	-45.4705	1489.006	-2.3901	1.1938	-0.53809	-0.728999999999999	-54.0464	87.1762	-0.052734	0.28467	-0.12891	-14.465	25.6907	1.4039	-0.015869	-0.1311	0.072754	-13.112	63.548	998.1726	-1.5957	0.61719	-0.3418	110.641	-182.3692	976.08898	-1.7889	1.1097	-0.31934
1.738	-1.651	178.526	718.3559	-1.1255	0.44121	-0.16826	-22.961	183.456	624.03475	-1.0527	0.58955	-0.26162	26.852	-109.46	1500.3	-2.4043	1.1982	-0.55859	2.265	-33.435	111.828	-0.082031	0.29297	-0.14404	-62.7145	-6.9642	16.38	-0.013672	-0.1333	0.070313	3.54499999999999	131.1528	965.07	-1.5347	0.59912	-0.32373	86.42048	-163.30805	1002.3601	-1.6992	1.0762	-0.32422
1.74	-27.716	145.48474	697.1943	-1.0645	0.40918	-0.16602	-32.93845	146.7675	606.8299	-0.98779	0.56787	-0.25342	47.229	-60.5918	1524.492	-2.3984	1.1953	-0.57422	-25.9247	-47.202	163.3189	-0.098145	0.29932	-0.1543	-23.614	11.3907	-5.1272	-0.010742	-0.14063	0.072754	-11.788	125.166	945.343	-1.5054	0.59033	-0.31348	81.4293	-234.259	1059.52601	-1.6035	0.98242	-0.32324
1.742	2.758	179.1554	661.2878	-1.0061	0.38242	-0.16142	-7.432	113.422	585.545	-0.93623	0.54424	-0.24658	61.4995	-28.926	1521.888	-2.3687	1.186	-0.58936	2.666	-44.8061	244.27	-0.14502	0.31543	-0.16162	-43.8415	-5.0695	-10.74	-0.0078125	-0.14746	0.068848	-1.993	109.3895	937.6069	-1.4409	0.57373	-0.29443	68.428	-227.868	1129.371	-1.5718	0.92871	-0.32031
1.744	-32.784	199.466	619.3728	-0.95068	0.35674	-0.15595	-27.671921	166.646	555.55	-0.87959	0.52764	-0.23115	70.1524	-66.995	1567.75	-2.3423	1.1705	-0.60009	-49.761	-25.353	311.276	-0.19971	0.32154	-0.1853	-46.7082	-13.3228	8.6555	-0.0039063	-0.15332	0.062988	8.997	200.044	887.914	-1.3997	0.55664	-0.27759	26.676	-231.395	1160.176	-1.5488	0.80664	-0.30762
1.746	-21.278	142.161	604.086	-0.89404	0.32588	-0.15713	7.089	115.362	542.5761	-0.83193	0.49951	-0.21318	93.6245	8.32000000000001	1525.2723	-2.3062	1.1606	-0.6084	-99.238	-61.769	412.709	-0.25977	0.32666	-0.2041	-27.652	25.8837	7.678	-0.00097656	-0.16114	0.062989	18.577	166.625	872.4129	-1.3589	0.5376	-0.25439	24.746	-290.169	1222.851	-1.5681	0.72388	-0.29297
1.748	4.2	167.674	573.846	-0.8457	0.30283	-0.14834	35.7794	139.655	515.197	-0.79053	0.47764	-0.20733	50.3683	-31.251	1480.286	-2.2656	1.1328	-0.61719	-96.8152	-43.5941	526.137	-0.36328	0.35156	-0.229	-75.9877	3.4189	11.1353	0.00097656	-0.16309	0.055176	33.322	197.588	837.9964	-1.3022	0.52783	-0.23975	3.292	-237.895	1259.836	-1.6069	0.65527	-0.28271
1.75	-38.44	140.77	560.466	-0.79883	0.28516	-0.14258	9.546	160.4	490.142	-0.75732	0.45361	-0.1958	53.009	-21.5492	1507.0501	-2.2422	1.1191	-0.62402	-158.72	-43.3302	569.1486	-0.41846	0.36084	-0.24365	-28.381	24.56179	0.4081	-0.0078125	-0.1626	0.04834	19.664	236.889	796.6665	-1.2793	0.51465	-0.22217	-11.8768	-222.688	1241.986	-1.6978	0.59521	-0.26025
1.752	9.212	122.5999	537.947	-0.75117	0.25996	-0.13936	4.8	129.944	483.528	-0.71866	0.44014	-0.18389	22.788	34.9866	1486.8626	-2.2144	1.0864	-0.62061	-111.736	-44.935	635.966	-0.5498	0.37109	-0.26221	-31.5586	21.5145	-20.4236	-0.0097656	-0.16309	0.046875	-35.517	174.136	767.6635	-1.2227	0.5	-0.2041	-0.769000000000002	-193.874	1287.384	-1.7593	0.58252	-0.25244
1.754	-3.039	166.699	495.816	-0.70342	0.2419	-0.13389	-8.819	188.004	438.258	-0.68134	0.43194	-0.17608	5.195	-3.763	1506.3341	-2.1978	1.0601	-0.61767	-81.326	-16.407	651.465	-0.66797	0.38086	-0.27344	-44.3686	-9.6589	6.1543	-0.018555	-0.16748	0.038574	-36.3785	216.877	713.111	-1.1616	0.49072	-0.18896	-23.71	-90.262	1280.372	-1.8945	0.58398	-0.24316
1.756	-29.138	129.9731	466.07934	-0.65615	0.2165	-0.13194	-23.8292	154.7003	405.4863	-0.64541	0.42686	-0.17178	30.214	51.2569	1528.657	-2.1855	1.0332	-0.61719	-88.655	-52.163	713.22	-0.80225	0.40381	-0.27783	5.858	26.482	9.95068	-0.034424	-0.16479	0.034912	-42.1586	175.21744	691.21	-1.1289	0.48438	-0.18408	-27.411	-106.181	1324.1276	-1.9968	0.60962	-0.24194
1.758	33.173	160.7689	433.8768	-0.6082	0.19287	-0.12559	2.188	124.088	375.2488	-0.59961	0.42139	-0.16914	0.760000000000002	47.558	1504.349	-2.1758	1.001	-0.60938	-39.326	-74.1425	752.671	-0.99609	0.43359	-0.26465	-13.876	36.03	-11.28991	-0.052734	-0.15918	0.037109	-32.91	134.878	692.1111	-1.0576	0.47266	-0.16602	-8.072	-90.465	1375.992	-2.0952	0.65283	-0.25684
1.76	11.408	160.756	396.1734	-0.55713	0.1665	-0.12402	-34.524	153.4312	335.7963	-0.55615	0.41455	-0.16602	-14.234	-24.858	1527.073	-2.1714	0.98486	-0.60693	-36.886	-29.0649	728.1595	-1.0957	0.45605	-0.24951	-1.501	54.579	5.231	-0.083496	-0.15039	0.042969	-4.28	191.586	642.296	-1.0036	0.45533	-0.15943	-9.462	-68.898	1369.0939	-2.2227	0.73535	-0.28418
1.762	14.513	116.864	373.6246	-0.51582	0.1417	-0.11689	-46.734	86.708	305.7876	-0.50859	0.39805	-0.1584	12.943	34.8798	1484.9004	-2.1602	0.96094	-0.60547	-25.332	-24.975	791.3385	-1.312	0.48682	-0.22314	27.2747	65.109	-9.7556	-0.10059	-0.13965	0.04834	-31.21158	132.83	611.304	-0.94971	0.44189	-0.14795	17.941	-131.8774	1421.542	-2.2832	0.7793	-0.29785
1.764	38.94	144.1032	358.883	-0.47177	0.11934	-0.11074	-27.6592	109.909	276.883	-0.46553	0.38145	-0.15156	30.402	24.6859	1458.944	-2.15	0.94776	-0.60254	15.73	9.046	817.3234	-1.4809	0.50928	-0.21631	-13.367	25.2733	-3.3845	-0.13184	-0.11572	0.05127	-20.917	162.863	582.1994	-0.87646	0.41504	-0.13428	-14.736	-92.704	1436.405	-2.4097	0.87939	-0.32227
1.766	26.801	134.692	324.6084	-0.43193	0.09629	-0.10605	-34.6956	128.241	257.6309	-0.42021	0.36387	-0.14492	75.747	45.4965	1498.9724	-2.1328	0.93555	-0.59961	-21.154	7.396	821.3574	-1.6602	0.5542	-0.22119	39.798	32.8721	13.6021	-0.16064	-0.087402	0.05957	-6.568	180.886	546.70202	-0.84717	0.39941	-0.13037	-43.201	-95.17	1432.81	-2.5034	0.95166	-0.33423
1.768	65.3986	129.0575	311.8736	-0.39678	0.075195	-0.099119	-4.9419	98.555	247.871205	-0.38243	0.34385	-0.13682	62.867	95.51	1460.29	-2.1133	0.92578	-0.5957	14.474	-65.467	840.9962	-1.8945	0.63672	-0.25244	50.0682	48.526	-7.5018	-0.1709	-0.075195	0.067871	2.919	118.162	548.4893	-0.78076	0.37354	-0.11768	-28.576	-138.6621	1474.088	-2.6074	1.0215	-0.34375
1.77	54.701	154.033	274.3189	-0.36328	0.056641	-0.091797	-9.16	150.88	219.882	-0.34717	0.32959	-0.12842	18.425	13.773	1457.57526	-2.0972	0.91846	-0.59424	23.995	-85.5981	860.386	-1.9897	0.69189	-0.26758	21.947	34.324	16.0188	-0.18652	-0.043945	0.074707	43.6603	174.574	524.891	-0.73438	0.34961	-0.11109	-46.549	-95.047	1486.1671	-2.73	1.1138	-0.35107
1.772	48.416	113.5659	267.351	-0.33066	0.039844	-0.089258	-22.9916	114.822	191.532	-0.32246	0.31074	-0.11651	61.847	46.703	1444.8685	-2.0762	0.91016	-0.58594	-44.4651	-116.41	925.448	-2.0938	0.79883	-0.26758	42.8482	47.901	31.899	-0.18823	-0.023193	0.082032	26.9579	161.045	505.291	-0.69189	0.32373	-0.094238	-22.032	-141.123	1494.468	-2.7847	1.1606	-0.35693
1.774	73.1609	117.48899	267.5426	-0.29932	0.021192	-0.083691	-2.956	90.277	199.0499	-0.29492	0.29639	-0.10821	53.573	56.1929	1441.133	-2.0615	0.89697	-0.57129	2.363	-117.253	993.128	-2.116	0.87281	-0.27002	21.4673	27.5825	6.9874	-0.19385	-0.0039063	0.084961	6.056	128.1686	481.67	-0.63721	0.29395	-0.085938	16.536	-145.22	1536.185	-2.8765	1.2407	-0.36084
1.776	23.768	135.943	223.583	-0.26885	0.0036133	-0.080566	-51.5284	136.668	187.3811	-0.26875	0.28427	-0.1	17.26	26.246	1458.773	-2.0469	0.87598	-0.55078	-0.234000000000002	-63.721	970.7404	-2.1055	0.94922	-0.28223	28.308	10.46754	25.9627	-0.18604	0.018555	0.086426	-19.9687	180.08	436.6534	-0.61084	0.28369	-0.080566	15.323	-85.747	1520.25	-2.9195	1.2876	-0.35693
1.778	59.9838	111.212	228.851	-0.23799	-0.016016	-0.076172	-37.0573	86.1221	193.5953	-0.24726	0.27305	-0.091993	29.876	103.1104	1422.552	-2.0391	0.85352	-0.54102	24.766	-105.118	949.209	-2.0151	1.0317	-0.29297	54.3736	31.96	28.911	-0.1875	0.029785	0.089355	-44.3535	143.17206	407.757	-0.56641	0.26074	-0.072266	27.85524	-142.09	1531.129	-2.9468	1.3208	-0.35693
1.78	72.7196	131.031	199.2037	-0.21387	-0.030273	-0.071289	-12.685	103.2127	169.60577	-0.2251	0.2666	-0.087402	-16.709	71.095	1354.7654	-2.0313	0.83789	-0.53711	91.429	-144.301	960.457	-1.9551	1.0605	-0.29785	6.884	16.85034	31.883	-0.16943	0.04541	0.091797	-15.65	170.122	363.628	-0.53516	0.24658	-0.06665	34.436	-97.6295	1553.391	-2.9727	1.3652	-0.35156
1.782	11.225	106.095	177.179	-0.18897	-0.045117	-0.069141	-45.8611	85.3397	131.1335	-0.20313	0.25313	-0.079687	-8.311	66.246	1330.7291	-1.9956	0.83057	-0.5249	44.491	-169.858	989.386	-1.8281	1.0869	-0.30859	23.162	21.2131	27.0341	-0.16285	0.050782	0.093505	-25.969	182.558	330.401	-0.50049	0.23389	-0.064453	36.604	-77.6739	1529.4728	-2.9741	1.3774	-0.35596
1.784	56.592	93.8265	180.6192	-0.16748	-0.061914	-0.064649	-36.3664	39.494	130.121	-0.17705	0.2457	-0.075586	14.546	126.763	1304.5364	-1.9617	0.82691	-0.5127	86.094	-222.493	1076.243	-1.7441	1.0557	-0.31005	9.187	43.79	11.92256	-0.15283	0.055664	0.092773	-31.5234	106.69	309.266	-0.4541	0.21631	-0.057129	59.732	-110.738	1541.2044	-2.9629	1.3965	-0.35742
1.786	15.061	112.254	132.7434	-0.14756	-0.074805	-0.060742	-37.658	84.3338	109.207	-0.14971	0.2418	-0.069336	17.107	67.6107	1304.73	-1.9312	0.81885	-0.50146	94.246	-229.274	1137.308	-1.6772	0.99072	-0.29932	-13.679	25.154498	19.8459	-0.13525	0.055176	0.092285	-19.618	142.508	286.354	-0.4292	0.20313	-0.056152	61.460705	-17.587	1529.0694	-2.9485	1.4035	-0.35718
1.788	-22.531	84.271	145.33573	-0.13037	-0.085351	-0.056836	-35.7167	72.885	81.867	-0.12598	0.22353	-0.06211	74.2556	133.613	1291.67	-1.8843	0.79932	-0.48877	21.744	-247.963	1149.151	-1.6245	0.85596	-0.27588	17.761	35.448	45.586	-0.12891	0.052246	0.087891	-19.8769	117.087	258.71	-0.38037	0.18604	-0.051758	23.674	-23.712	1507.1162	-2.9316	1.3984	-0.35889
1.79	23.915	95.958	149.981	-0.11572	-0.094238	-0.056641	14.596	72.255	84.5426	-0.10205	0.2124	-0.055176	55.27701	147.837	1249.2826	-1.8672	0.7832	-0.48242	12.154	-290.786	1199.366	-1.6167	0.77979	-0.26123	-31.458	11.5365	24.6511	-0.10596	0.039551	0.083984	1.033	103.263	255.39688	-0.34522	0.16431	-0.04419	26.448	0.929	1515.4241	-2.8999	1.3853	-0.34668
1.792	-26.541	86.006	138.6622	-0.10205	-0.10635	-0.050879	1.772	91.691	47.091	-0.075586	0.19404	-0.046387	42.405	95.264	1241.255	-1.8335	0.76416	-0.46338	-3.579	-253.212	1210.263	-1.6382	0.63721	-0.23193	-43.675	2.5029	28.0894	-0.085693	0.025879	0.080078	-3.611	147.911	214.438	-0.31494	0.14844	-0.042969	14.65	73.67	1501.2599	-2.8848	1.373	-0.34375
1.794	-21.561	66.784	134.8681	-0.085742	-0.1166	-0.050586	-9.486	27.9195	54.501	-0.052343	0.17852	-0.04082	69.954	170.737	1204.2795	-1.8035	0.75708	-0.4502	-22.9849	-233.234	1243.939	-1.6894	0.55761	-0.22265	-24.662	31.589	24.8709	-0.068359	0.0087891	0.07373	-16.951	96.399	206.284	-0.27734	0.12451	-0.03418	27.2474	13.7543	1498.906	-2.853	1.3501	-0.33154
1.796	-6.93	93.707	88.77418	-0.073242	-0.12012	-0.050976	17.771	56.4	57.00821	-0.035155	0.16485	-0.034569	50.581	137.066	1178.065	-1.7676	0.75	-0.43799	11.6013	-180.368	1289.819	-1.7578	0.49609	-0.21289	-73.279	21.6666	26.151	-0.043945	-0.011719	0.057129	-22.09	126.058	204.98798	-0.25732	0.11133	-0.031738	40.4	41.744	1507.5857	-2.8252	1.3222	-0.32178
1.798	-39.186	78.228	66.7032	-0.057324	-0.1251	-0.04873	6.124	68.772	20.043	-0.01748	0.1541	-0.025585	53.651	118.2254	1170.257	-1.7202	0.74365	-0.42432	-43.719	-112.629	1301.096	-1.8711	0.46777	-0.19873	-39.6495	21.1841	49.015	-0.030762	-0.019043	0.050781	-25.1798	145.817	171.32539	-0.22461	0.091797	-0.024902	8.93	45.721	1464.53065	-2.7964	1.2944	-0.31494
1.8	-17.121	63.994	81.1184	-0.039551	-0.12939	-0.048828	42.3473	54.878	55.6202	-0.00048828	0.146	-0.014648	18.652	159.13	1138.4426	-1.6817	0.73731	-0.41211	-51.362	-132.896	1340.642	-1.9351	0.4751	-0.2041	-35.8016	24.9354	14.0784	-0.0039063	-0.037109	0.039063	-24.5124	84.9504	179.419	-0.20166	0.077393	-0.019043	17.01	-17.79813	1497.51	-2.7515	1.2544	-0.30127
1.802	-40.415	90.304	60.9053	-0.028125	-0.13291	-0.045703	11.748	93.229	43.458	0.013768	0.13858	-0.0066414	-35.1947	95.375	1114.71	-1.6382	0.72705	-0.39209	-34.298	-111.835	1354.143	-2.0776	0.53564	-0.21777	-65.7993	-22.7484	6.1993	0.012451	-0.044678	0.029297	-19.649	108.01	165.265	-0.18066	0.068848	-0.0078125	11.906	48.583	1478.776	-2.728	1.2271	-0.29395
1.804	-49.622	56.43	61.3629	-0.015625	-0.13399	-0.04961	-18.816	62.631	31.609	0.025974	0.13409	-0.0025407	4.421	144.454	1093.869	-1.5879	0.73047	-0.37695	-48.4568	-97.146	1333.522	-2.1707	0.61157	-0.24195	-23.091	2.9818	2.1171	0.02832	-0.058105	0.017578	-26.2063	53.61	120.967	-0.15283	0.0625	-0.00097656	-18.2222	13.2682	1464.9398	-2.6777	1.1777	-0.2793
1.806	1.69	52.922	54.392	-0.0046876	-0.1332	-0.051953	16.446	41.3352	46.887	0.039253	0.13135	0.00097656	10.468	164.103	1052.37701	-1.5562	0.73291	-0.37354	6.776	-145.41	1369.3959	-2.2559	0.70508	-0.27783	-42.8006	9.31007	2.7603	0.047852	-0.069824	-0.00097656	-37.105	32.021	113.988	-0.13818	0.058105	0.00048828	-6.793	-9.5389	1497.5329	-2.6402	1.1446	-0.2854
1.808	-40.3386	52.857	61.325	0.011816	-0.13301	-0.054395	-2.876	50.308	9.87531	0.052926	0.12519	0.0054682	-21.571	121.3341	1029.071	-1.4902	0.71777	-0.35938	-38.834	-88.266	1359.049	-2.3496	0.83008	-0.32813	-22.101	-10.5172	38.73	0.060547	-0.073242	-0.0063477	-9.373	79.3142	76.558	-0.11328	0.049316	0.0068359	-8.82	56.432	1465.8908	-2.5933	1.1177	-0.27588
1.81	-22.568	33.502	70.502	0.027832	-0.13574	-0.057617	17.329	2.404	31.9394	0.068848	0.12256	0.0068359	12.539	201.075	1001.672	-1.4395	0.70704	-0.3462	-74.857	-102.675	1359.296	-2.3901	0.89502	-0.35303	16.685	1.76222	25.335	0.075684	-0.082031	-0.028809	-10.499	54.6035	78.4849	-0.082276	0.040528	0.011475	-38.0027	13.387	1465.2732	-2.5332	1.084	-0.2666
1.812	-7.968	59.066	50.6059	0.041992	-0.13428	-0.063672	26.684	5.5	29.27734	0.083503	0.11689	0.0076192	2.906	173.238	962.2086	-1.3921	0.69092	-0.3335	-39.477	-126.7957	1399.812	-2.4507	1.0063	-0.3833	-17.816	-27.151	14.5155	0.082764	-0.091308	-0.042236	16.178	75.884	86.7097	-0.060547	0.035645	0.019531	-25.846	67.6905	1478.311	-2.4893	1.0694	-0.26123
1.814	-24.488	52.508	43.7699	0.060937	-0.13731	-0.06416	-19.5858	1.278	-2.354	0.09806	0.10966	0.0067511	26.449	168.737	954.812	-1.3237	0.67529	-0.31543	-86.927	-89.988	1394.91	-2.5132	1.1118	-0.40967	4.724	-15.2991	18.4532	0.097168	-0.095703	-0.058105	-4.098	77.505	46.158	-0.021484	0.021973	0.015625	-54.9331	98.524	1433.483	-2.4453	1.0527	-0.25781
1.816	9.206	25.2479	44.137	0.074609	-0.13652	-0.068848	20.636	-23.696	10.9059	0.11369	0.10028	0.010637	35.0615	222.767	931.428	-1.291	0.66406	-0.30664	-79.788	-148.7245	1460.616	-2.541	1.1602	-0.43066	7.218	23.7706	-4.2666	0.10498	-0.1001	-0.078125	-0.303000000000001	29.7199	47.9737	-0.0014648	0.016602	0.020996	-54.79	36.3607	1430.384	-2.3823	1.0337	-0.25146
1.818	1.256	24.9355	20.2073	0.085351	-0.13985	-0.062988	27.555	13.377	16.5728	0.12403	0.084263	0.017582	-6.877	159.056	903.5065	-1.228	0.65479	-0.28955	-34.88	-150.9996	1482.867	-2.5854	1.2446	-0.43115	-6.192	4.4364	25.6802	0.10547	-0.10547	-0.089355	28.089	74.17	33.51	0.035156	0.003418	0.019531	-41.4739	100.038	1404.366	-2.3472	1.0269	-0.24365
1.82	8.574	-15.7995	39.351	0.094727	-0.1377	-0.07373	9.502	-0.625999999999998	31.606	0.13428	0.070313	0.019531	4.368	209.967	882.151	-1.1766	0.63697	-0.27759	-68.337	-120.3846	1467.413	-2.6054	1.2959	-0.43848	33.829	-1.8326	51.5639	0.10352	-0.11133	-0.10303	15.418	41.143	32.349	0.060791	-0.008545	0.022461	-46.0445	70.755	1361.3229	-2.2695	1.0039	-0.24316
1.822	53.5393	7.2694	29.7271	0.10557	-0.14004	-0.070703	9.653	14.6371	38.763	0.13603	0.051205	0.024211	-19.191	216.405	807.6846	-1.1265	0.62158	-0.26416	-38.907	-146.243	1497.251	-2.6211	1.334	-0.44141	9.97	-38.2077	19.636	0.09375	-0.104	-0.13306	23.672	22.8913	38.4842	0.086914	-0.01709	0.022949	-29.513	80.2298	1355.1386	-2.2058	0.98218	-0.24024
1.824	18.976	17.9371	5.624	0.11191	-0.14443	-0.066406	-16.715	52.82	14.5844	0.13282	0.036792	0.032297	-57.5861	160.017	786.4438	-1.0649	0.59717	-0.24561	-20.5079	-81.28	1481.186	-2.6284	1.3735	-0.44531	28.92	-67.2284	46.3286	0.060547	-0.11426	-0.17871	8.394	52.593	5.6036	0.10742	-0.038086	0.020996	-12.274	158.538	1307.0426	-2.1426	0.95313	-0.23633
1.826	38.4642	-11.3541	28.9998	0.11777	-0.14326	-0.062891	-7.865	19.3959	15.7199	0.13086	0.017254	0.045145	-45.1418	234.739	762.431	-1.0366	0.5874	-0.23682	-15.068	-74.006	1475.4093	-2.627	1.3809	-0.44434	57.04	-25.198	62.47963	0.052734	-0.097168	-0.20703	4.376	16.3186	13.223	0.11572	-0.047363	0.023438	-14.362	96.5095	1281.585	-2.0581	0.92236	-0.22412
1.828	40.5862	14.6611	19.5034	0.12021	-0.14267	-0.059863	-30.696	24.0968	44.176	0.12286	0.010279	0.055627	-48.7914	180.583	739.468	-0.98242	0.5625	-0.22168	32.0513	-92.613	1507.362	-2.6147	1.395	-0.44189	14.349	-27.028	105.3003	0.042969	-0.086426	-0.21826	0.417999999999999	30.3437	20.2338	0.12256	-0.060059	0.03125	10.834	138.619	1284.935	-2.0215	0.9043	-0.21924
1.83	-7.086	-0.4889	20.8639	0.12158	-0.14648	-0.052246	-67.0388	20.20229	29.631	0.11963	0.00048828	0.066895	-17.923	172.772	711.047	-0.94068	0.54761	-0.20704	-16.7779	-18.969	1447.4037	-2.5994	1.3986	-0.43921	49.619	-5.326	160.868	-0.00097656	-0.071289	-0.24756	-0.0240000000000009	33.8116	19.5326	0.12329	-0.070556	0.035156	-0.341000000000001	137.263	1241.5809	-1.9453	0.86035	-0.21973
1.832	62.4129	0.1897	22.5638	0.12285	-0.14297	-0.050781	2.745	-7.508	15.57453	0.11613	-0.0062042	0.076326	-26.156	205.3682	648.423	-0.90039	0.53516	-0.19531	-18.0687	-56.226	1460.3755	-2.5781	1.4023	-0.43262	53.142	15.5758	177.276	-0.050293	-0.056641	-0.27832	-2.515	-7.9993	33.9673	0.12402	-0.082031	0.041504	7.817	71.476	1249.5665	-1.8891	0.83984	-0.21118
1.834	16.806	33.0855	10.5371	0.11816	-0.13603	-0.044727	-23.663	32.79	1.2903	0.11994	-0.014529	0.088058	-48.2451	140.573	640.735	-0.85352	0.52344	-0.17822	-18.0901	-42.4215	1464.4115	-2.5469	1.3965	-0.41797	18.685	3.1198	236.387	-0.10791	-0.038086	-0.29639	17.047	40.558	13.5459	0.11328	-0.083496	0.052246	41.378	137.536	1241.699	-1.8296	0.81494	-0.20557
1.836	-15.402	6.3394	16.6781	0.11699	-0.13369	-0.04043	-32.6425	17.2681	0.125999999999999	0.12733	-0.024822	0.092951	-2.438	200.866	607.363	-0.82764	0.51025	-0.17627	-13.2667	13.625	1438.9493	-2.5293	1.3965	-0.41113	48.077	41.20634	316.6868	-0.20313	-0.01123	-0.33496	8.104	2.7558	3.4408	0.11475	-0.085938	0.054199	28.373	101.2306	1202.319	-1.7446	0.7876	-0.20068
1.838	49.483	21.72528	18.5054	0.1169	-0.13047	-0.02832	10.736	3.32766	9.1232	0.14528	-0.031718	0.095056	-1.435	198.677	565.72762	-0.77734	0.48877	-0.15869	14.29375	-29.849	1450.3168	-2.5034	1.3794	-0.39697	-0.745000000000005	83.92999	407.4771	-0.25244	0.0029297	-0.3501	-6.458	-21.0797	10.8979	0.10547	-0.083008	0.060547	37.869	90.871	1182.617	-1.707	0.76953	-0.19922
1.84	-13.189	26.16	-13.0318	0.11768	-0.12549	-0.020508	-17.459	31.381	0.964	0.16455	-0.041504	0.098145	-3.654	156.666	550.229	-0.73853	0.46753	-0.146	-0.611000000000001	34.013378	1421.4111	-2.4802	1.3723	-0.38598	-14.877	111.986	534.777	-0.38721	0.038086	-0.38721	4.415	11.1405	-2.09359	0.099608	-0.080078	0.070068	52.4879	154.245	1142.1624	-1.627	0.73633	-0.19873
1.842	13.018	4.3817	5.2422	0.11201	-0.12461	-0.019141	6.334	6.1168	1.1742	0.18435	-0.052881	0.092646	4.7504	206.826	504.9037	-0.70117	0.43994	-0.13086	-35.391	48.697	1400.684	-2.4565	1.3618	-0.38232	12.765	153.489	617.363	-0.49462	0.070556	-0.40992	0.231000000000002	-18.1777	7.7287	0.09375	-0.074219	0.077637	31.976	93.853	1098.313	-1.5743	0.7124	-0.19604
1.844	28.965	21.0196	10.4204	0.1084	-0.11826	-0.010547	26.911	18.5708	7.3518	0.20385	-0.064171	0.089166	-40.861	159.8656	481.1403	-0.65088	0.40723	-0.11963	-22.1904	5.261	1416.927	-2.4194	1.3403	-0.36865	-56.319	99.516	666.801	-0.61377	0.10352	-0.41992	15.376	21.8697	7.83	0.096191	-0.071777	0.088867	52.771	130.2108	1088.87	-1.5195	0.68652	-0.19141
1.846	-47.6613	11.612865	13.5802	0.11035	-0.11357	-0.0035156	-27.0194	17.1604	20.2048	0.2247	-0.078904	0.086851	-20.245	163.6022	455.822	-0.62012	0.38867	-0.11523	-42.826	67.744	1406.3386	-2.4023	1.3301	-0.36133	-38.9178	44.582	732.80723	-0.78809	0.16602	-0.43262	-16.199	48.83	5.3415	0.09668	-0.070801	0.094727	57.6117	148.668	1049.9859	-1.4429	0.6499	-0.18896
1.848	-22.199	17.9378	23.6065	0.10625	-0.11563	0.0026367	-15.155	-20.61553	41.88	0.24049	-0.099882	0.077017	-4.314	199.96	417.5254	-0.5791	0.35547	-0.1001	-25.197	5.704	1424.668	-2.373	1.3027	-0.35449	-35.062	4.772	802.711	-0.87891	0.19922	-0.42773	-29.319	18.3097	33.5834	0.10303	-0.067871	0.1084	45.064	95.134	1044.7084	-1.4043	0.63477	-0.18408
1.85	-29.754	39.3109	-15.0504	0.10596	-0.11523	0.0073242	-8.176	25.1545	27.437	0.25098	-0.11914	0.070313	-46.091	136.792	396.163846	-0.54346	0.3396	-0.090332	-10.1783	-12.8079	1420.705	-2.3553	1.2835	-0.34595	-42.485	-43.264	851.457	-1.0835	0.26416	-0.39111	-17.941	49.375	25.9111	0.1084	-0.068604	0.11035	55.634	177.711	1009.047	-1.3315	0.59912	-0.17725
1.852	-33.4908	8.5341	1.752	0.10606	-0.11934	0.0090818	5.51	3.61125	19.3866	0.26062	-0.14112	0.05805	-14.646	161.7533	363.503	-0.50781	0.32324	-0.085449	-36.952	28.5109	1382.342	-2.3301	1.2559	-0.33252	5.172	-41.577	861.481	-1.2488	0.32373	-0.34595	-31.213	22.2428	17.7668	0.12158	-0.064453	0.11084	36.277	139.787	960.871	-1.2671	0.56934	-0.17749
1.854	-10.007	10.8091	15.3624	0.10156	-0.12295	0.012695	17.094	-11.966	29.3262	0.26395	-0.16308	0.051035	-18.0248	141.501	322.987	-0.46484	0.30176	-0.08252	-37.9936	-23.405	1393.1851	-2.2988	1.2246	-0.32715	-41.998	-70.098	777.959	-1.4375	0.38867	-0.30469	-21.657	12.7746	25.5939	0.14063	-0.069824	0.10889	36.303	139.3415	923.9107	-1.2075	0.54053	-0.18066
1.856	-59.6208	19.25627	3.6469	0.096875	-0.12685	0.014257	-2.185	28.8534	11.8043	0.26144	-0.18374	0.035414	-37.1553	99.507	308.7143	-0.43701	0.29346	-0.081543	-56.9133	48.236	1376.1364	-2.271	1.2085	-0.3208	-49.589	-135.6661	745.67	-1.7305	0.4873	-0.23682	-8.651	39.719	-2.5915	0.15088	-0.070313	0.10693	39.428	202.411	876.4511	-1.1245	0.50439	-0.17188
1.858	-31.2169	-1.152	27.0718	0.093262	-0.1333	0.016895	10.685	-0.2859	-9.0495	0.25799	-0.20143	0.028827	-4.036	158.673	279.928	-0.39063	0.27783	-0.073242	-99.73	57.453	1335.916	-2.2207	1.1758	-0.31201	-21.2334	-113.434	748.862	-1.8843	0.55713	-0.21631	-19.9559	-0.662599999999999	-13.50388	0.16895	-0.07666	0.10205	12.769	139.394	855.204	-1.0835	0.48535	-0.16943
1.86	-23.3497	33.764	10.38022	0.083984	-0.14063	0.02002	29.102	42.973	-7.198	0.24219	-0.21338	0.022461	-14.2631	117.5205	260.71	-0.35596	0.25562	-0.072998	-45.664	9.19	1353.3792	-2.1784	1.1447	-0.29907	-60.354	-100.48	769.51278	-2.2363	0.69922	-0.22168	-14.423	17.1937	-1.6116	0.17602	-0.083007	0.094727	13.784	190.746	826.5353	-1	0.44727	-0.16797
1.862	-37.751	21.7609	14.674	0.074023	-0.15088	0.018945	18.318	44.37	-7.7821	0.23204	-0.22692	0.018376	-25.292	119.686	234.323	-0.31641	0.23438	-0.068848	-89.413	85.361	1323.837	-2.125	1.1064	-0.29004	-19.5796	-65.4659	840.761	-2.4295	0.82984	-0.22436	-2.203	36.6186	-4.6508	0.18359	-0.091797	0.085449	1.44900000000001	204.761	781.5213	-0.94116	0.41699	-0.16381
1.864	-5.052	14.7776	34.2265	0.063379	-0.1581	0.019043	32.298	1.9028	12.3852	0.21634	-0.23318	0.014429	-15.374	151.884	181.05	-0.27197	0.21533	-0.065918	-99.946	36.2842	1330.386	-2.0542	1.0542	-0.2832	-39.037	-33.4543	851.9	-2.5249	0.94678	-0.22754	-2.696	-0.3643	26.31986	0.18799	-0.1084	0.074707	-6.49	146.2192	771.4781	-0.88672	0.3877	-0.15918
1.866	-14.616	46.444	-0.146000000000001	0.04541	-0.16553	0.019043	1.516	31.4459	6.6336	0.20153	-0.234	0.0080187	-28.8996	100.354	181.5209	-0.24951	0.19678	-0.065918	-55.247	64.76952	1293.63	-2.0176	1.0342	-0.2793	-108.165	-77.945	886.617	-2.4844	1.0801	-0.22754	-1.893	39.1456	36.065	0.18799	-0.11328	0.068848	-3.996	227.473	727.694	-0.81641	0.3457	-0.14941
1.868	-5.853	26.97	-3.705	0.037011	-0.16953	0.019531	-6.243	26.827	-8.3314	0.18459	-0.23066	0.0015701	-10.462	149.884	186.7515	-0.21191	0.17676	-0.064453	-87.493	140.114	1235.0678	-1.9414	0.99707	-0.26074	-54.947	-96.375	915.92	-2.4043	1.1367	-0.23828	-1.654	20.7335	19.546	0.17871	-0.125	0.058105	-11.216	179.484	705.6212	-0.7793	0.32422	-0.14648
1.87	23.015	38.931	20.1821	0.016113	-0.17041	0.019531	27.6092	36.822	13.7169	0.1665	-0.22656	-0.00097656	-26.6635	133.62	155.5778	-0.18653	0.1604	-0.056641	-59.276	78.604	1241.8369	-1.8867	0.97217	-0.2644	-29.4652	-86.009	918.706	-2.1738	1.2324	-0.27979	-1.712	9.638	31.269	0.16773	-0.13379	0.047608	0.665000000000006	162.1269	677.3993	-0.70703	0.28223	-0.13916
1.872	-24.0039	39.3254	4.118169	0.0014649	-0.1749	0.021484	-10.611	61.238	19.037	0.15566	-0.2202	-0.0006007	-20.379	87.7956	148.273	-0.16309	0.14551	-0.05127	-48.3358	137.565	1203.4163	-1.834	0.94531	-0.25879	10.962	-83.93	971.0297	-1.9859	1.274	-0.32691	20.803	38.76	19.9842	0.15576	-0.14209	0.043945	5.869	206.881	630.8003	-0.65137	0.2566	-0.13672
1.874	13.797	15.327	29.025	-0.013867	-0.17735	0.026855	-15.598	7.15908	33.8922	0.14413	-0.20281	-0.0063743	-13.708	125.812	116.5641	-0.13037	0.13672	-0.044434	-62.932	130.089	1176.7616	-1.7637	0.89941	-0.24805	59.089	-61.11	982.211	-1.8262	1.2715	-0.36572	2.558	-5.75207	11.7931	0.13232	-0.15088	0.039063	-13.224	134.021	606.731	-0.59912	0.23193	-0.12842
1.876	40.8577	30.5737	10.7957	-0.032227	-0.17656	0.028418	-15.222	25.716	-0.501099999999999	0.13996	-0.18611	-0.0099327	-50.0847	72.02	99.4206	-0.11816	0.12939	-0.035645	-6.109	80.965	1184.7635	-1.7402	0.88086	-0.23926	14.07	-97.002	949.8392	-1.668	1.1699	-0.4126	6.07100000000001	13.0923	14.647672	0.11621	-0.15186	0.035156	-3.658	173.164	585.183	-0.53467	0.20068	-0.12402
1.878	2.872	25.5415	11.5882	-0.046875	-0.16905	0.03291	-23.9262	24.894	-8.6563	0.13506	-0.16838	-0.016531	-21.126	74.4944	93.0647	-0.091797	0.11377	-0.031738	-8.0168	161.837	1171.759	-1.689	0.82275	-0.21973	38.714	-163.736	959.033	-1.6172	1.0645	-0.42773	2.242	29.702	-8.299	0.092773	-0.15137	0.028809	-3.44	190.931	553.481	-0.50146	0.18311	-0.12158
1.88	41.1453	26.847	40.266	-0.056152	-0.16309	0.040039	9.336	10.8274	30.7221	0.13428	-0.14551	-0.024414	-5.925	109.618	51.6016	-0.071045	0.11328	-0.02002	-15.9694	101.5281	1171.458	-1.6551	0.78589	-0.19922	62.641	-209.111	980.297	-1.5488	0.7998	-0.4375	11.286	-1.3635	22.563	0.07666	-0.14746	0.026368	12.708	137.4905	523.687771	-0.44238	0.15283	-0.11377
1.882	27.25	47.552	15.2481	-0.072656	-0.15049	0.043262	-14.88	42.999	34.673	0.13612	-0.12378	-0.029309	-21.556	41.093	55.31712	-0.049316	0.10498	-0.016602	-1.239	102.87285	1134.557	-1.6191	0.75	-0.18848	33.739	-257.975	1056.427	-1.5225	0.59986	-0.43017	23.282	57.021	19.6167	0.062012	-0.14209	0.021973	14.546	197.757	489.258	-0.3999	0.13477	-0.10523
1.884	13.279	25.3947	25.293	-0.085547	-0.13847	0.044824	-9.356	6.3514	26.76152	0.13848	-0.10217	-0.036467	-4.305	68.804	47.731	-0.021484	0.097656	-0.010742	-12.491	138.617	1075.733	-1.5742	0.71094	-0.17188	41.528	-274.013	1156.747	-1.5171	0.42432	-0.42627	1.752	23.2085	14.30011	0.045898	-0.12402	0.023438	13.752	155.352	462.24275	-0.36377	0.11377	-0.10107
1.886	48.92745	22.501	38.2249	-0.09375	-0.12246	0.053027	-0.965	-0.4516	7.3494	0.14044	-0.084219	-0.045436	-5.249	53.758	26.0877	-0.0019531	0.093262	-0.0083008	-1.889	67.825	1057.944	-1.5508	0.69336	-0.17139	-43.839	-238.109	1159.429	-1.5464	0.24268	-0.42285	23.696	15.9507	22.9671	0.03418	-0.11475	0.018555	34.892	156.2333	452.079	-0.31152	0.090332	-0.095215
1.888	18.614	17.2386	22.6642	-0.098634	-0.10664	0.054883	-32.5391	36.6501	8.4058	0.14355	-0.067947	-0.046285	9.493	22.0678	34.754	0.027832	0.075684	-0.0039063	28.4221	135.9271	1043.4425	-1.4937	0.66846	-0.16455	-70.7484	-249.883	1189.795	-1.5815	0.17334	-0.41895	5.359	42.702	1.21432	0.035156	-0.092285	0.016602	39.532	201.983	434.199	-0.2915	0.07373	-0.090332
1.89	13.629	-17.34	39.699	-0.10303	-0.092773	0.056152	-18.611	3.71	28.0593	0.14063	-0.056641	-0.053711	23.421	72.835	36.4396	0.046387	0.06836	-0.00073245	7.6521	122.4229	1023.8451	-1.4404	0.65405	-0.1626	-32.9536	-221.643	1241.565	-1.6641	0.095703	-0.40527	-12.549	1.445	5.15811	0.031738	-0.07837	0.0075684	31.351	133.934	391.789	-0.24951	0.050293	-0.086914
1.892	24.28	14.4006	28.50525	-0.10518	-0.079786	0.062988	-0.191000000000003	26.3216	46.978	0.1378	-0.038485	-0.054691	-1.688	28.013	34.9391	0.069824	0.053223	0.0053711	32.7378	82.142	1009.261	-1.3882	0.63916	-0.15381	-47.3393	-169.734	1261.388	-1.7388	0.10156	-0.3916	14.69	22.3562	12.3109	0.038574	-0.061523	0.0058594	44.536	173.267	355.6276	-0.21069	0.031006	-0.080566
1.894	-13.867	24.2522	11.2855	-0.10635	-0.064355	0.058105	-45.9462	50.2333	11.3243	0.13625	-0.024713	-0.057996	-11.056	28.086	48.331	0.094238	0.036621	0.0029297	14.071	153.627	967.2877	-1.3198	0.61475	-0.15869	17.444	-156.8723	1315.5145	-1.8198	0.15283	-0.38428	7.083	30.442	0.962000000000002	0.055176	-0.04248	0.0014648	57.09	159.179	328.5379	-0.18213	0.0083008	-0.075195
1.896	9.74	17.6355	27.5144	-0.10478	-0.056543	0.056934	-7.547	18.6412	17.1438	0.13271	-0.014563	-0.062697	9.769	52.894	15.2186	0.10059	0.030273	0.0019531	8.692	106.1736	947.7283	-1.2847	0.60205	-0.15479	42.463	-88.314	1319.5568	-1.9292	0.28662	-0.38623	-9.035	-5.2613	31.607	0.065918	-0.02832	-0.00048828	43.417	106.591	312.0088	-0.14697	-0.023438	-0.071289
1.898	-6.875	37.351	22.6431	-0.10088	-0.045898	0.05459	9.914	44.032	27.7808	0.12764	-0.0077175	-0.062597	-6.305	-3.6067	25.548	0.11865	0.010742	0.010742	26.521	147.267	921.1667	-1.2202	0.56592	-0.146	1.721	-63.58	1318.597	-1.9722	0.3667	-0.40186	1.251	37.768	19.2432	0.085449	-0.018555	-0.01123	56.319	166.315	287.949	-0.12891	-0.037109	-0.072266
1.9	-34.219	-1.3573	30.497	-0.094238	-0.044434	0.049805	-15.122	20.97	42.557	0.11865	0.0039063	-0.063965	20.674	38.1589	27.1083	0.13232	-0.003662	0.0073243	-5.513	195.489	868.4618	-1.1758	0.53198	-0.13818	55.9194	-73.967	1352.446	-2.0566	0.53223	-0.42773	-23.37339	18.66287	16.5129	0.10449	-0.0068359	-0.021973	46.791	124.012	269.2066	-0.10107	-0.064941	-0.064941
1.902	0.278000000000002	3.9455	29.196	-0.087012	-0.037403	0.044824	11.907	6.7335	36.4282	0.10586	0.016314	-0.06416	6.828	26.94	10.8198	0.13477	-0.019043	0.022949	20.538	129.89532	847.84224	-1.1348	0.50195	-0.12988	60.0453	-47.616	1324.9034	-2.1123	0.64697	-0.43823	-15.863	11.64289	24.1725	0.11279	-0.0053711	-0.021484	47.18	125.883	264.2493	-0.079345	-0.081787	-0.060791
1.904	-41.7378	25.4095	13.11074	-0.078223	-0.032617	0.032227	-0.378	35.261	-0.933	0.091499	0.028325	-0.064743	-13.222	6.0151	20.3671	0.14355	-0.038574	0.021973	-11	180.651	808.2054	-1.0859	0.45947	-0.11182	35.097	-78.307	1334.964	-2.1772	0.74854	-0.44873	4.546	32.904	12.50291	0.12744	-0.0039063	-0.030273	31.053	147.131	240.6203	-0.062012	-0.10645	-0.052246
1.906	-24.755	10.143	35.874	-0.070019	-0.03457	0.027149	14.658	-1.53	11.1602	0.073922	0.043949	-0.063966	14.548	41.955	-1.016	0.14307	-0.042969	0.025879	-33.60646	157.7	768.848	-1.0586	0.44092	-0.10986	39.459	-80.205	1348.082	-2.271	0.86768	-0.46143	-27.022	-10.626	11.2708	0.13549	-0.0083007	-0.032715	13.628	84.56	222.09	-0.04248	-0.12891	-0.04541
1.908	-16.248	20.6288	22.0512	-0.05625	-0.033008	0.016113	17.593	4.5974	13.9886	0.057322	0.065237	-0.063867	4.347	-3.32295	5.7794	0.14502	-0.062012	0.033203	-17.265	122.504	751.949	-1.0098	0.40234	-0.104	-61.306	-55.0685	1333.856	-2.3247	0.92236	-0.47412	-17.108	2.595	11.9539	0.14063	-0.0048828	-0.029297	30.793	107.7641	205.1452	-0.030762	-0.13525	-0.047852
1.91	-58.7157	12.0566	0.9975	-0.041504	-0.03418	0.0014648	-0.545000000000002	15.8503	14.1614	0.041504	0.083496	-0.065918	8.269	-5.9522	40.1106	0.14234	-0.069336	0.039306	-22.866	207.128	700.8462	-0.96484	0.3789	-0.099123	-55.06066	-73.868	1391.772	-2.4316	1.0059	-0.49658	-1.185	16.2677	-7.5265	0.14648	-0.013672	-0.035156	1.996	109.442	175.2739	-0.017578	-0.15186	-0.038086
1.912	-2.978	-7.5948	9.4404	-0.029688	-0.040136	-0.010254	13.492	-11.9526	13.4701	0.020802	0.10449	-0.061328	2.591	13.5395	20.67	0.14063	-0.072266	0.046875	-22.686	160.0922	703.7978	-0.91797	0.36133	-0.096191	-12.169	-51.552	1438.108	-2.5151	1.063	-0.52197	-26.728	-6.9839	6.946695	0.14648	-0.015137	-0.033691	2.749	66.5395	184.301	-0.0063477	-0.15893	-0.031739
1.914	-19.323	26.4313	-4.141	-0.015918	-0.04541	-0.026269	13.008	27.82	20.8626	0.0042987	0.12705	-0.057812	-0.637	-3.9432	30.38	0.13623	-0.077148	0.060059	-26.121	185.149	666.137	-0.84766	0.33594	-0.09668	-26.698	-63.861	1464	-2.5488	1.0781	-0.54102	-14.999	47.551	17.5839	0.14648	-0.020996	-0.034668	-9.714	109.299	157.916	0.0029297	-0.16455	-0.027832
1.916	-42.3531	7.4318	16.527	-0.0077147	-0.047363	-0.038379	12.1942	3.498	58.524	-0.014062	0.15049	-0.057422	18.27	42	24.1942	0.13281	-0.081055	0.066895	-58.945	193.477	631.3513	-0.81396	0.32178	-0.093262	27.417	-123.644	1519.974	-2.5781	1.0918	-0.57617	-7.554	40.333	10.8908	0.14722	-0.022461	-0.037353	-21.804	61.057	146.146	0.013184	-0.17676	-0.020508
1.918	-3.818	8.3414	24.157	0.0018555	-0.058398	-0.055078	12.566	-46.014	91.715	-0.032031	0.17832	-0.056738	-12.838	30.712	18.6204	0.13672	-0.084961	0.081055	-32.6839	121.7027	624.8652	-0.73779	0.2959	-0.099609	30.507	-64.0115	1499.518	-2.5778	1.0896	-0.59741	-14.116	24.1343	26.9502	0.14404	-0.023438	-0.037109	-17.379	58.688	133.4394	0.022949	-0.1792	-0.016113
1.92	-27.608	22.008	4.3507	0.003418	-0.059082	-0.066895	2.898	-37.8235	75.6799	-0.045898	0.19971	-0.04834	-20.498	9.7581	35.992	0.1372	-0.09497	0.094726	-10.843	173.347	584.5637	-0.68677	0.2688	-0.089844	27.279	-65.0352	1499.772	-2.564	1.0747	-0.6167	-7.559	39.448	14.4264	0.13965	-0.023926	-0.036133	-36.248	87.58	118.37959	0.033203	-0.1875	-0.0068359
1.922	-16.402	-19.909	21.967	0.0063476	-0.058691	-0.082422	4.381	-73.72665	81.0032	-0.063477	0.22158	-0.052149	0.972999999999999	39.464	9.8657	0.13818	-0.099609	0.099609	-44.1793	147.809	558.0962	-0.64014	0.23682	-0.089355	95.7282	-27.675	1512.141	-2.5176	1.041	-0.63672	-15.569	-1.183	25.86834	0.12891	-0.020996	-0.026855	-34.984	40.7456	110.8432	0.04126	-0.19091	-0.0075684
1.924	21.964	5.5878	32.253	0.0085938	-0.059766	-0.096386	-3.776	-50.813	108.0976	-0.079492	0.25068	-0.055078	-11.6328	10.7854	-2.5647	0.14697	-0.11084	0.10059	-32.72	122.183	535.40367	-0.57324	0.19531	-0.086914	61.711	30.484	1470.213	-2.4897	1.0259	-0.6499	2.228	9.5487	23.7294	0.11426	-0.016602	-0.029297	-27.789	67.108	106.1732	0.052734	-0.19287	-0.0078125
1.926	-8.313	-0.132	37.31346	0.0085938	-0.060937	-0.11552	-12.9295	-28.726	174.2239	-0.095118	0.2749	-0.060547	-12.36	2.3123	35.658	0.15527	-0.11768	0.10547	-15.954	187.096	491.667	-0.54541	0.17676	-0.084473	55.701	-34.325	1497.131	-2.418	0.9707	-0.66504	15.23	26.79404	-6.2818	0.093748	-0.0087889	-0.034424	-34.1293	60.828	77.1395	0.066895	-0.19531	-0.0014648
1.928	35.2577	-33.2911	49.5757	0.0058593	-0.056836	-0.13008	-21.7709	-71.9991	264.558	-0.11162	0.29844	-0.068945	-20.203	10.3875	10.5581	0.16895	-0.12402	0.091309	-10.693	126.655	492.977	-0.48584	0.13916	-0.077637	57.3932	-16.198	1487.803	-2.3611	0.92603	-0.6726	6.966	-3.725	-2.80672	0.073242	-0.0019531	-0.038574	-28.894	8.377	84.473	0.070313	-0.19385	-0.00097656
1.93	16.704	2.721	46.356	0.0019531	-0.057129	-0.14453	-55.059	-35.724	358.502	-0.13232	0.31982	-0.078613	-35.541	-19.4094	14.2266	0.17944	-0.13232	0.085205	14.838	143.137	456.7247	-0.44654	0.11304	-0.076172	-34.513	-9.148	1463.493	-2.3047	0.87109	-0.68066	17.287	33.6015	1.6111	0.046387	0.0083008	-0.038574	-36.574	42.921	54.9149	0.084473	-0.19678	0.0043945
1.932	-18.3959	-15.438	61.551	0.0023437	-0.054981	-0.16367	-85.668	-25.978	494.206	-0.15986	0.34228	-0.092675	20.823	22.475	8.2239	0.18213	-0.14404	0.071777	-20.844	160.352	438.11375	-0.40625	0.086426	-0.078125	6.871	-2.736	1505.1975	-2.2319	0.80322	-0.68311	12.043	14.12902	-2.7534	0.03125	0.015625	-0.039551	-25.249	16.9322	49.13	0.0896	-0.19458	0.0014649
1.934	39.0259	2.2469	108.7832	0.0029297	-0.053906	-0.18106	-104.431	-43.1525	630.34	-0.19024	0.36855	-0.10742	-7.545	17.86631	-18.8303	0.18994	-0.1582	0.053711	28.999	125.2554	419.7579	-0.35791	0.06543	-0.085449	3.529	92.691	1475.8388	-2.2046	0.77197	-0.68115	6.423	-2.7419	49.6345	-0.0014648	0.035645	-0.043457	-17.601	25.1426	45.3581	0.098633	-0.1958	0.0019531
1.936	32.103	25.072	123.1622	-0.0001953	-0.055469	-0.19316	-159.282	6.795	692.6045	-0.22813	0.39004	-0.12657	-34.048	1.5254	18.6683	0.1958	-0.16162	0.049805	30.624	173.949	375.526	-0.33252	0.04834	-0.083496	-20.263	78.761	1465.1966	-2.1655	0.72705	-0.68604	10.972	13.3582	64.7886	-0.024902	0.048828	-0.05249	-21.257	67.639	20.7787	0.10498	-0.18848	0.0053711
1.938	62.123	-0.12988	175.779	0.00097653	-0.052344	-0.21572	-166.038	-23.726	748.49	-0.27539	0.41524	-0.14717	5.624	37.411	7.8024	0.19531	-0.16748	0.027344	12.399	142.8346	349.1661	-0.28809	0.026855	-0.085938	30.091	60.592	1462.9923	-2.1508	0.6997	-0.6875	-0.390000000000001	-36.4545	75.494	-0.048828	0.06543	-0.055664	-8.69	35.027	33.85724	0.10791	-0.18262	0.010742
1.94	61.402	31.8567	233.2139	-0.0063477	-0.04834	-0.23389	-96.693	-34.298	825.804	-0.33545	0.43018	-0.17676	-12.938	17.367	2.1167	0.19678	-0.17139	0.0097656	41.484	116.4648	333.6011	-0.25195	0.0090334	-0.086426	-18.933	82.9827	1436.2683	-2.1289	0.67969	-0.68555	17.079	-37.491	117.357	-0.083008	0.085938	-0.057129	9.404	48.867	36.2514	0.1167	-0.18018	0.01416
1.942	30.579	67.289	340	-0.016601	-0.039161	-0.2625	-69.633	-61.232	881.794	-0.40469	0.44854	-0.20762	4.273	26.9638	20.1991	0.19775	-0.16846	0.0029297	33.565	152.48	296.7122	-0.22168	-0.003418	-0.081543	17.79	40.5777	1464.801	-2.1094	0.65527	-0.67969	-16.3387	-3.517	149.9981	-0.10254	0.099121	-0.062988	13.8333	37.459	20.2127	0.11914	-0.17919	0.016113
1.944	55.982	78.6231	453.666	-0.033886	-0.036621	-0.27627	-31.821	-115.3646	914.156	-0.48467	0.46494	-0.23018	-1.843	27.785	22.1179	0.19482	-0.16602	-0.015137	44.2773	107.573	298.7576	-0.18604	-0.030273	-0.091797	52.607	87.965	1505.544	-2.1016	0.64648	-0.67871	-53.034	-30.316	266.12	-0.15479	0.12646	-0.063965	13.18	-6.8391	26.3383	0.12012	-0.17529	0.023926
1.946	31.415	122.835	520.919	-0.060839	-0.028028	-0.29307	-34.082	-82.217	885.931	-0.57998	0.48369	-0.26221	-19.962	-20.8931	34.9351	0.19091	-0.15454	-0.019287	48.918	130.529	284.5085	-0.16748	-0.041992	-0.094238	45.535	106.082	1470.127	-2.0898	0.63477	-0.66748	-22.4537	-9.986	379.384	-0.20727	0.14233	-0.082519	1.951	26.89	-1.7669	0.12646	-0.17188	0.021484
1.948	17.232	78.325	584.755	-0.11182	-0.024219	-0.31729	-7.562	-55.3586	867.757	-0.7003	0.50127	-0.29111	8.171	16.1466	6.8016	0.18945	-0.14063	-0.029785	9.695	149.937	260.4216	-0.13428	-0.060547	-0.089844	62.9254	46.675	1463.413	-2.0776	0.63233	-0.65918	-73.596	-55.143	443.964	-0.2627	0.16797	-0.09375	20.765	6.50526	-1.435	0.12988	-0.16748	0.032227
1.95	25.46	46.424	671.2244	-0.17676	-0.022949	-0.3418	41.268	-48.553	915.18544	-0.83398	0.53027	-0.3125	0.981	28.5132	-17.1826	0.18408	-0.11914	-0.044922	42.1621	115.286	253.1674	-0.11621	-0.074219	-0.091797	37.523	70.927	1412.0139	-2.0742	0.64063	-0.65039	-114.622	-98.7812	516.327	-0.35938	0.2002	-0.10254	32.009	16.9226	-6.3729	0.12744	-0.16357	0.037109
1.952	-27.8288	19.856	748.31454	-0.26221	-0.0041985	-0.35879	37.51	-4.198	913.164	-0.97793	0.55742	-0.31758	6.322	14.8387	0.278	0.18652	-0.11084	-0.049316	44.614	135.851	217.3309	-0.095703	-0.085938	-0.094238	9.116	30.3729	1386.5455	-2.0649	0.65088	-0.64014	-121.8648	-65.054	571.747	-0.41943	0.20996	-0.10986	27.509	49.764	-30.7606	0.12524	-0.15796	0.041993
1.954	-10.8209	-57.735	847.702	-0.36046	0.01172	-0.37373	51.041	-62.51	881.59	-1.1546	0.59463	-0.31904	15.841	43.094	0.9564	0.17871	-0.08252	-0.064453	15.397	110.963	211.1611	-0.067871	-0.10449	-0.096191	46.472	34.658	1430.244	-2.0527	0.6543	-0.6333	-115.691	-107.581	640.933	-0.55322	0.22803	-0.12256	35.3744	5.08652	-2.5315	0.11963	-0.15234	0.049805
1.956	-3.838	-59.274	856.596	-0.4714	0.029298	-0.38545	87.3404	-115.337	886.2623	-1.3577	0.64385	-0.30966	3.862	16.8403	-5.7447	0.17823	-0.055176	-0.071289	14.456	83.19022	204.9736	-0.051514	-0.11426	-0.10059	-1.597	93.624	1405.15	-2.0293	0.65723	-0.62402	-59.539	-87.72	709.471	-0.68139	0.24267	-0.13037	30.507	28.217	8.1477	0.10498	-0.14355	0.062012
1.958	-47.888	-65.155	825.129	-0.6003	0.055568	-0.39404	21.023	-99.05	915.068	-1.5777	0.70195	-0.30391	-0.726999999999997	26.8211	-6.6606	0.1748	-0.032227	-0.079102	-14.81	113.668	184.71	-0.037109	-0.12549	-0.104	-14.271	29.123	1392.906	-2.0059	0.6587	-0.61133	-40.9721	-48.47	683.907	-0.81836	0.25488	-0.13379	4.341	32.727	9.874	0.09375	-0.13697	0.066162
1.96	-9.9849	-117.0574	850.958	-0.74414	0.083496	-0.39648	-3.682	-123.927	1005.137	-1.7905	0.76807	-0.30078	22.427	46.218	-1.4124	0.17139	0.0019531	-0.089355	-10.184	69.5507	179.1496	-0.025879	-0.13721	-0.10547	-2.208	59.968	1352.12	-1.9858	0.65088	-0.5957	-59.8273	-64.00071	691.781	-1.0288	0.26904	-0.12207	27.887	2.2267	26.9382	0.084961	-0.12842	0.075684
1.962	-24.4658	-91.987	845.075	-0.89266	0.11845	-0.39502	30.898	-64.52	1026.08	-1.9819	0.83018	-0.29131	2.545	-1.8816	36.651	0.17236	0.016602	-0.093262	-2.59500000000001	84.51	171.958	-0.022949	-0.14453	-0.10156	-28.938	61.856	1296.713	-1.9565	0.64307	-0.56982	-42.552	-3.4743	702.12	-1.1387	0.27344	-0.10205	2.057	47.087	13.5552	0.072266	-0.12256	0.085938
1.964	-53.407	-95.779	877.38947	-1.0505	0.16375	-0.37793	81.1815	-62.61	989.295	-2.1492	0.9041	-0.29375	2.373	30.58	35.6974	0.16895	0.049316	-0.10449	-29.201	97.082	142.8056	-0.027832	-0.14111	-0.098145	8.296	52.0232	1283.621	-1.9468	0.64111	-0.55811	-57.8578	7.467	719.479	-1.3862	0.28076	-0.05957	-7.889	20.5337	-2.0446	0.062012	-0.11963	0.088379
1.966	-19.3122	-89.831	935.2354	-1.2169	0.22391	-0.34669	120.888	-149.495	978.666	-2.2652	0.98027	-0.30039	-15.2248	34.755	-6.3765	0.17261	0.072265	-0.11328	-15.742	47.6342	146.314	-0.029296	-0.13403	-0.091797	34.936	149.451	1223.591	-1.9116	0.63916	-0.53857	-31.665	1.095	774.088	-1.6003	0.29004	-0.047607	4.718	9.95984	10.3546	0.057617	-0.11963	0.095215
1.968	-69.834	-67.755	931.976	-1.4129	0.29969	-0.30635	119.024	-153.04	995.166	-2.319	1.0509	-0.30928	-11.192	19.75084	9.4662	0.17383	0.095703	-0.11768	-35.974	84.278	107.8447	-0.03125	-0.13379	-0.086426	14.656	129.298	1193.54	-1.8796	0.63598	-0.5188	13.644	7.521	777.281	-1.8379	0.30859	-0.047852	-12.712	43.754	-13.0222	0.049317	-0.11914	0.095703
1.97	-102.382	-125.969	971.026	-1.6465	0.41016	-0.25928	112.629	-197.497	1043.996	-2.3042	1.1196	-0.31201	14.599	53.581	21.02745	0.17676	0.12305	-0.12646	-65.544	72.833	106.0329	-0.035645	-0.12012	-0.078125	56.5342	115.11	1185.019	-1.8379	0.63135	-0.50879	-7.828	-65.9675	796.85	-2.1401	0.37939	-0.074219	-32.2614	7.9129	-2.55547	0.047363	-0.11475	0.098633
1.972	-70.304	-132.7604	980.787	-1.9268	0.55251	-0.22264	135.131	-241.038	1114.232	-2.2327	1.1759	-0.31543	-32.817	14.5504	18.3713	0.18018	0.13574	-0.12988	-2.156	50.7906	101.5682	-0.038086	-0.11377	-0.071289	43.158	139.9	1141.72	-1.7813	0.61914	-0.48828	-30.4247	-108.741	831.888	-2.2651	0.41943	-0.08252	-14.536	54.747	21.8792	0.037109	-0.12012	0.089355
1.974	-67.5045	-114.341	994.139	-2.2419	0.71822	-0.2085	115.3642	-238.7152	1139.928	-2.1371	1.2102	-0.33291	-1.794	24.57911	16.7332	0.18359	0.16064	-0.13135	-35.295	70.137	79.689	-0.034668	-0.098633	-0.060547	40.521	84.4024	1158.5443	-1.752	0.61035	-0.47852	-62.842	-83.426	835.621	-2.4453	0.52832	-0.12842	-26.822	43.376	22.1691	0.032227	-0.11768	0.089844
1.976	-3.594	-106.898	1043.762	-2.5486	0.89992	-0.22494	52.645	-334.162	1163.349	-2.0371	1.2188	-0.35517	17.964	42.8132	-3.9219	0.18286	0.177	-0.13501	-29.357	34.3231	77.941	-0.026368	-0.085938	-0.057617	61.659	123.5177	1126.823	-1.689	0.60791	-0.45459	-40.5536	-93.126	864.339	-2.4873	0.62305	-0.15771	-31.612	7.9929	29.9881	0.026367	-0.12451	0.082031
1.978	-1.603	-35.34	1041.8037	-2.763	1.0845	-0.2422	-2.202	-354.062	1212.433	-1.9463	1.1869	-0.36357	-16.9641	-2.963	22.4761	0.18359	0.19287	-0.13867	-19.06	49.1477	54.385	-0.018066	-0.077637	-0.051758	-2.685	121.9093	1091.2517	-1.6474	0.60644	-0.43774	48.8132	-68.341	867.375	-2.4546	0.7251	-0.18262	-18.703	45.851	23.092	0.023437	-0.12696	0.074707
1.98	-29.0562	-76.01	1042.088	-2.855	1.2524	-0.25928	2.273	-320.542	1239.7068	-1.873	1.1133	-0.3584	-0.434999999999999	23.0433	46.309	0.18311	0.2124	-0.1333	-39.0394	75.314	35.3078	-0.00048828	-0.072266	-0.046875	-9.664	86.608	1063.6279	-1.603	0.60791	-0.41748	51.409	-101.516	854.344	-2.3218	0.8501	-0.20557	-34.8577	3.5955	7.6707	0.02002	-0.12793	0.061035
1.982	6.558056	-158.468	1076.562	-2.7724	1.3863	-0.27332	-5.315	-293.19	1313.472	-1.8163	0.98115	-0.34365	-26.285	7.49498	22.0506	0.18311	0.21826	-0.13867	-6.953	45.5406	56.4477	0.0068359	-0.065918	-0.043945	-30.019	129.365	998.765	-1.5352	0.60352	-0.39844	59.3305	-180.607	904.617	-2.2358	0.91846	-0.2168	-39.3511	20.6206	23.06408	0.016113	-0.13477	0.052734
1.984	-17.4165	-185.7365	1116.135	-2.5778	1.4966	-0.29654	-20.4797	-158.075	1350.127	-1.7777	0.83779	-0.32188	-17.28	3.45375	19.9218	0.17969	0.22803	-0.13086	-15.604	78.821	34.15	0.023926	-0.061523	-0.038574	-35.001	101.166	964.1038	-1.5059	0.59961	-0.38672	75.515	-200.714	966.116	-2.0557	1.0225	-0.25586	-25.4193	41.417	27.674	0.0053711	-0.13672	0.042969
1.986	14.176	-237.044	1176.05	-2.3214	1.5689	-0.35072	-37.5292	-115.704	1350.4256	-1.7538	0.70303	-0.30312	4.784	54.226	15.4082	0.17188	0.23901	-0.12696	-10.663	37.184	25.6444	0.030274	-0.059082	-0.036133	21.837	93.377	950.025	-1.4429	0.58545	-0.35693	46.0817	-248.449	1024.8874	-1.9326	1.0654	-0.27685	-13.563	-4.7565	19.0411	-0.0019531	-0.14258	0.029297
1.988	30.039	-235.895	1225.261	-2.0741	1.5911	-0.42096	-40.941	-130.211	1376.883	-1.7557	0.59141	-0.29278	-26.2727	20.2055	20.54517	0.1665	0.24512	-0.12305	26.159	8.4206	25.0754	0.039551	-0.054199	-0.038086	-10.598	153.129	907.914	-1.3984	0.57544	-0.33667	46.154	-270.249	1103.314	-1.8335	1.0708	-0.30029	-18.618	20.294826	21.8944	-0.0073242	-0.14282	0.021485
1.99	-51.7103	-213.08	1230.615	-1.8691	1.5352	-0.48828	-26.203	-81.117	1364.719	-1.7813	0.50781	-0.27979	-11.2	18.1229	43.136	0.15137	0.25439	-0.11572	15.213	40.707	12.4166	0.039551	-0.050293	-0.035645	-4.45	110.9721	885.878	-1.3569	0.56006	-0.31787	24.027	-253.926	1119.306	-1.7344	0.99023	-0.31641	-7.164	19.6241	4.2152	-0.014648	-0.13867	0.010254
1.992	-61.7757	-273.114	1260.708	-1.7364	1.3656	-0.53485	-14.087	-126.407	1375.947	-1.8504	0.45664	-0.27324	-4.471	28.489	6.5234	0.14697	0.25537	-0.11084	27.193	-3.8918	23.6201	0.039063	-0.052246	-0.017578	9.927	167.342	853.5786	-1.2959	0.55029	-0.28662	-45.0681	-292.226	1134.286	-1.6948	0.92432	-0.31592	5.641	-0.363300000000001	21.2728	-0.025391	-0.13135	-0.003418
1.994	-33.356	-238.402	1280.921	-1.6392	1.1143	-0.53446	2.487	-116.216	1426.9	-1.9452	0.43564	-0.27939	-16.39	4.6626	3.0365	0.12891	0.2627	-0.10107	48.554	13.3831	12.0504	0.033203	-0.057129	-0.01709	-2.762	195.589	843.2042	-1.2656	0.54883	-0.271	2.3367	-259.995	1173.5776	-1.6519	0.75439	-0.30029	-1.419	41.256	19.1449	-0.033203	-0.12598	-0.0078125
1.996	-38.636	-198.931	1306.902	-1.5661	0.8209	-0.52443	-39.9501	-74.561	1420.2277	-2.0702	0.46221	-0.28642	13.659	28.3685	32.6644	0.11718	0.26538	-0.096193	12.231	27.7981	3.704	0.030762	-0.056152	-0.011963	35.386	163.95	851.48	-1.2109	0.54297	-0.24854	3.58127	-190.4932	1168.533	-1.6411	0.62597	-0.2915	14.7156	9.30493	27.7059	-0.035645	-0.11768	-0.017578
1.998	48.89294	-172.765	1383.1873	-1.512	0.54946	-0.506	-48.29977	-140.32805	1440.457	-2.2003	0.52588	-0.30693	4.609	7.2151	14.5308	0.10254	0.26611	-0.085938	53.1534	-11.8222	8.2129	0.030762	-0.058105	-0.0073242	49.5547	224.599	791.6043	-1.1685	0.54126	-0.23145	-25.6484	-157.411	1257.796	-1.6465	0.51465	-0.2832	12.965	7.4142	22.469	-0.037353	-0.11108	-0.026367
2	37.0163	-81.371	1376.278	-1.4897	0.31934	-0.49854	-54.715	-104.357	1442.6608	-2.3335	0.6167	-0.32959	-0.036999999999999	-16.86223	37.5807	0.081055	0.26855	-0.068359	40.462	16.1229	7.3218	0.02832	-0.061035	-0.00048828	-24.569	189.603	740.595	-1.1206	0.5376	-0.229	-7.0652	-101.015	1307.7198	-1.6895	0.41406	-0.26855	26.4139	16.502	9.9971	-0.037598	-0.099609	-0.037598
2.002	32.3072	-90.312	1360.739	-1.5019	0.15211	-0.49062	-62.791	-110.257	1445.593	-2.446	0.72295	-0.34873	17.002	29.0057	5.24139	0.068359	0.27002	-0.064941	-6.255	17.2346	9.37	0.030273	-0.062988	0	-24.043	186.4798	690.388	-1.0459	0.51953	-0.2085	-52.34	-106.966	1288.9585	-1.7246	0.38477	-0.25684	30.047	-22.8177	13.2489	-0.036133	-0.075195	-0.040527
2.004	80.0461	-86.981	1362.0209	-1.5432	0.032371	-0.47144	-26.173	-154.0631	1522.841	-2.5485	0.8375	-0.36524	-18.014	15.2531	-4.4667	0.042969	0.26807	-0.048828	30.67	11.09739	20.4525	0.030273	-0.072266	0.0053711	-52.9037	240.44	647.359	-1.0117	0.50781	-0.19727	-31.9545	-127.572	1305.5711	-1.8242	0.36621	-0.2334	24.19	16.90307	14.9189	-0.034668	-0.066895	-0.041504
2.006	55.792	-28.877	1353.015	-1.6099	-0.03038	-0.44713	-14.796	-85.226	1536.081	-2.6223	0.94961	-0.37265	11.844	17.6264	50.096	0.026123	0.26904	-0.035157	12.212	49.978	-1.55649	0.042481	-0.075439	0.0053711	-49.6627	177.7535	646.486	-0.93164	0.48438	-0.17969	-1.572	-62.057	1312.1622	-1.9289	0.38892	-0.22241	9.332	30.458704	-2.0592	-0.027832	-0.049316	-0.053223
2.008	63.223	-70.508	1423.3789	-1.7105	-0.030611	-0.41206	-31.194	-142.339	1528.975	-2.6637	1.0527	-0.37988	11.961	8.373	48.854	0.013672	0.27051	-0.023926	6.23	2.1028	13.9053	0.049316	-0.081543	0.0092773	-11.462	201.9794	618.0874	-0.88183	0.46386	-0.16772	-31.669	-57.709	1340.425	-2.041	0.44238	-0.21924	21.256	5.4216	10.7663	-0.023926	-0.028076	-0.053711
2.01	49.877	-26.61	1436.8707	-1.832	0.041504	-0.38574	-8.1417	-152.222	1580.132	-2.6836	1.1465	-0.39258	-22.331	-51.4201	54.156	-0.0078125	0.27148	-0.019043	15.867	19.9327	17.8624	0.055664	-0.09375	0.012207	-37.548869	182.854	580.1836	-0.83057	0.44287	-0.16162	-30.961	-49.467	1392.2851	-2.1987	0.54541	-0.22021	26.398	38.702	2.0243	-0.024414	-0.012695	-0.05957
2.012	-18.471	-3.133	1417.5375	-1.9745	0.19259	-0.38576	23.9643	-108.203	1570.702	-2.6831	1.2173	-0.39971	19.263	-41.2446	64.13682	-0.017578	0.26953	-0.01416	-11.002	23.9059	-7.3374	0.061035	-0.098145	0.01709	-13.326	139.011	570.746	-0.77051	0.4126	-0.14502	-71.056	-39.607	1385.77	-2.2808	0.6001	-0.2334	3.343	-5.0539	1.3661	-0.01416	0.010254	-0.0625
2.014	-2.89	-66.806	1432.885	-2.1112	0.39789	-0.40276	61.798	-150.542	1571.827	-2.6699	1.2719	-0.40449	5.557	-45.6964	68.8072	-0.036621	0.27002	-0.019531	5.97	9.7069	6.0627	0.063477	-0.11084	0.017578	-22.5856	210.611	541.795	-0.74219	0.40137	-0.13867	-118.888	-114.6387	1433.824	-2.4351	0.71924	-0.25684	27.102	-7.9979	23.5826	-0.015625	0.018555	-0.064941
2.016	-4.297	-26.375	1427.844	-2.2273	0.61162	-0.42064	64.9438	-66.524	1512.4469	-2.6575	1.3086	-0.40605	-24.8017	-75.1122	142.7985	-0.054687	0.27612	-0.031738	-23.374	62.014	8.7589	0.070068	-0.12207	0.016357	-36.4753	181.999	532.24737	-0.68506	0.37988	-0.12598	-78.547	-115.75	1484.724	-2.532	0.80249	-0.27124	8.407	24.409	14.3885	-0.0053711	0.04248	-0.063477
2.018	1.483	-65.986	1464.661	-2.3175	0.81181	-0.44637	33.5189	-28.95	1445.572	-2.6435	1.3182	-0.40996	-0.963999999999999	-46.4073	190.6177	-0.07373	0.27734	-0.041992	-39.497	51.974	1.9803	0.069336	-0.12793	0.019043	24.458	186.508	516.0394	-0.64624	0.36181	-0.12207	-86.491	-129.457	1492.494	-2.603	0.88721	-0.29346	-18.491	-9.160687	2.3352	-0.0026855	0.055176	-0.065674
2.02	39.724	-109.328	1501.945	-2.3823	0.97705	-0.47607	21.496	-49.32	1488.2596	-2.6304	1.3149	-0.4126	-49.415	-58.8049	228.485	-0.1167	0.28711	-0.054688	-9.737	20.738	20.23074	0.071289	-0.14453	0.021484	12.052	212.253	461.5742	-0.61084	0.3501	-0.1167	-50.4289	-155.846	1530.371	-2.6641	0.99023	-0.32422	-9.66	27.385	8.1631	0.0063477	0.06543	-0.063965
2.022	20.27	-54.6537	1474.477	-2.4173	1.0969	-0.51792	40.535	27.067	1479.7661	-2.6305	1.293	-0.40469	-34.0844	-39.823	326.546	-0.14258	0.29102	-0.0625	-52.4917	46.71	2.91312	0.069824	-0.15479	0.017578	4.528	140.089	446.9554	-0.55664	0.33154	-0.10303	-22.7211	-101.6443	1494.404	-2.6733	1.0317	-0.34375	-17.889	26.511	-13.1269	0.015625	0.078125	-0.063965
2.024	43.336	-116.079	1517.519	-2.4292	1.1697	-0.55248	56.662	-14.5484	1469.71	-2.6339	1.2708	-0.39551	-53.336	-7.027	421.205	-0.21973	0.28027	-0.089844	-35.4082	3.049	18.6297	0.064453	-0.17041	0.025879	-20.7731	167.652	425.134	-0.52539	0.31982	-0.10498	-50.286	-130.04	1465.896	-2.6758	1.123	-0.38281	-10.807	-6.5269	4.7513	0.020996	0.084473	-0.067383
2.026	74.5001	-79.704	1542.295	-2.4292	1.2046	-0.58853	67.632	-23.606	1482.057	-2.6358	1.2485	-0.38731	-136.825	-27.84446	518.885	-0.28735	0.28686	-0.11011	-25.048	19.012	33.826	0.060303	-0.17724	0.021728	-52.661	166.646	414.922	-0.47803	0.30615	-0.10254	-3.88917	-127.053	1519.468	-2.66	1.1838	-0.3977	-14.969	39.6476	4.03	0.035156	0.10107	-0.067871
2.028	65.1663	-39.783	1500.66	-2.4199	1.2057	-0.61789	29.6651	32.6787	1441.467	-2.6408	1.2303	-0.37783	-133.038	21.7037	597.1464	-0.37402	0.29004	-0.12939	-56.048	32.7176	14.6751	0.052246	-0.18457	0.021973	-22.7102	129.9658	401.702	-0.4441	0.29004	-0.099611	4.118	-75.682	1523.912	-2.644	1.231	-0.40283	-22.3129	17.6202	-5.602	0.048095	0.10547	-0.077149
2.03	60.4553	-85.1962	1513.099	-2.4023	1.1777	-0.64355	-14.811	-19.571	1428.208	-2.6382	1.2231	-0.37207	-149.8921	37.763	648.9247	-0.50146	0.30078	-0.16064	-30.483	6.1334	27.2156	0.046387	-0.19141	0.023438	-20.51	164.1541	350.161	-0.40723	0.2793	-0.092285	-26.2243	-91.926	1553.408	-2.6304	1.2778	-0.41504	-37.697	19.3509	16.9116	0.066895	0.10596	-0.077637
2.032	-12.54	13.003	1477.959	-2.3862	1.1251	-0.65567	-7.715	46.4583	1425.7338	-2.6344	1.2168	-0.36699	-162.225	14.818	748.997	-0.57227	0.30664	-0.17578	-19.589	44.012	10.8533	0.04248	-0.19385	0.024902	-32.96081	112.605	311.5968	-0.37109	0.25391	-0.087891	8.797669	-38.271	1544.256	-2.627	1.293	-0.4165	-22.251	39.62	-1.3748	0.086426	0.11279	-0.085938
2.034	-26.435	17.322	1472.77073	-2.3712	1.0625	-0.66765	2.008	65.009	1405.278	-2.6222	1.2223	-0.36055	-114.951	18.51	813.981	-0.74414	0.32422	-0.19824	-33.5532	12.6792	10.14772	0.033203	-0.20313	0.023438	-20.1494	103.479	287.258	-0.35352	0.24658	-0.079102	-41.068	3.607	1465.52612	-2.6162	1.3086	-0.40918	-38.225	-6.26625	3.6592	0.09668	0.11182	-0.089355
2.036	0.818000000000005	15.991	1482.025	-2.3521	0.98929	-0.67986	-3.99	-14.158	1449.9165	-2.6156	1.232	-0.35899	-104.624	-19.883	801.629	-0.88501	0.34424	-0.19848	16.441	4.68317	42.274	0.027344	-0.19996	0.02417	-28.7479	143.122	251.4131	-0.32178	0.22607	-0.065918	-36.815	-4.932	1468.529	-2.6098	1.2935	-0.39649	-15.26	26.8767	4.25379	0.10742	0.11035	-0.095703
2.038	-2.661	104.858	1448.6929	-2.323	0.91908	-0.68949	5.048	31.707	1445.64	-2.6079	1.244	-0.36142	-83.02292	-34.115	780.035	-1.0327	0.37744	-0.18848	2.792	39.852	12.289	0.018066	-0.19873	0.023926	-12.931	94.1589	261.9882	-0.30029	0.20899	-0.06543	20.1937	39.703	1448.036	-2.6089	1.2739	-0.38037	-25.153	25.1052	-1.1351	0.11645	0.10767	-0.098144
2.04	17.06	10.385	1468.4464	-2.2808	0.86377	-0.69482	-48.457	-23.2568	1428.7917	-2.5879	1.2549	-0.36084	-25.008	-20.131	747.896	-1.2358	0.43018	-0.15234	-12.887	2.5582	20.24313	0.013672	-0.19629	0.029297	0.0410000000000004	124.893	239.17576	-0.28223	0.19678	-0.056641	-21.9568	26.072	1429.527	-2.6108	1.2388	-0.35303	-27.216	10.23954	0.1901	0.12207	0.10645	-0.10449
2.042	4.733	40.807	1467.4074	-2.238	0.82272	-0.70298	-50.7668	-5.062	1438.9795	-2.5682	1.2597	-0.35439	4.34400000000001	-63.9306	771.857	-1.3496	0.45703	-0.13037	21.27	30.9085	24.645	0.0097656	-0.19092	0.029785	-24.173	110.662	211.52835	-0.2627	0.18213	-0.043457	12.0598	7.5093	1470.0905	-2.6094	1.2207	-0.33398	-11.437	63.924	4.3216	0.12549	0.10059	-0.11377
2.044	-21.687	77.979	1425.64	-2.1962	0.80283	-0.7175	-70.232	76.148	1413.3752	-2.5379	1.2523	-0.34561	23.116	-58.8904	786.582	-1.6035	0.53516	-0.11475	1.947	28.046	11.6914	-0.0024414	-0.18896	0.026367	-0.602	80.4088	194.4917	-0.25488	0.17529	-0.031738	-1.59506	44.4318	1463.643	-2.6226	1.1958	-0.30225	-27.8824	27.349	-5.9356	0.12012	0.099609	-0.11475
2.046	28.223	37.45872	1432.696	-2.1631	0.80401	-0.72179	-79.2185	4.1691	1389.78579	-2.5051	1.2351	-0.34405	8.211	-48.0652	749.287	-1.7983	0.61621	-0.12158	27.701	-3.9094	23.31936	-0.0041504	-0.1831	0.025879	5.7	143.704	175.317	-0.23828	0.1665	-0.01416	-48.9	3.8848	1475.32	-2.6309	1.1992	-0.27246	3.678	29.449	15.8826	0.11572	0.093262	-0.12842
2.048	64.053	126.716	1433.1805	-2.1371	0.81702	-0.72753	-48.8859	50.0063	1365.37	-2.4703	1.2051	-0.33438	10.409	-84.88	764.629	-1.9707	0.70605	-0.125	26.948	41.139	4.29971	-0.010254	-0.17773	0.022949	-14.337	112.592	187.8096	-0.22656	0.15869	-0.0009766	-4.089	14.1968	1488.697	-2.627	1.2031	-0.25488	15.749	41.158	25.53788	0.10693	0.090576	-0.14111
2.05	72.432	68.3092	1438.2652	-2.1191	0.83789	-0.729	-69.421	46.4727	1327.977	-2.4253	1.1763	-0.32471	24.165	-78.7429	789.968	-2.1191	0.82959	-0.11914	12.882	20.9076	9.9465	-0.019043	-0.16699	0.02002	1.525	97.115	175.87949	-0.21094	0.15332	0.0078125	-14.9076	28.28	1445.435	-2.6211	1.2031	-0.22803	-1.568	-25.03644	64.1534	0.094238	0.083984	-0.16357
2.052	83.44	14.724	1438.94	-2.1102	0.86082	-0.73134	-74.844	6.456	1337.228	-2.379	1.1413	-0.31611	-37.56635	-108.383	817.962	-2.1484	0.88574	-0.11426	46.1047	17.4459	23.0385	-0.025391	-0.16309	0.018066	-43.0836	94.7149	131.9262	-0.18945	0.14014	0.023438	-26.3013	-32.9124	1450.497	-2.6082	1.2063	-0.21338	25.907	-15.931	80.5704	0.062012	0.09082	-0.18945
2.054	39.807	54.90621	1410.328	-2.0985	0.87753	-0.73165	-76.043	124.835	1331.91	-2.3269	1.1099	-0.31534	-5.889	-128.103	862.433	-2.1401	1.0024	-0.11475	4.606	46.002	33.796	-0.030762	-0.15039	0.016602	-38.3252	19.946	108.9962	-0.17578	0.13965	0.025391	-6.451	18.2527	1436.0439	-2.5874	1.1938	-0.20166	5.571	-32.727	76.4252	0.034668	0.10205	-0.18604
2.056	29.221	-13.8759	1415.751	-2.0856	0.88964	-0.72345	-84.531	99.747	1295.27838	-2.2659	1.0817	-0.30674	31.846	-97.481	882.783	-2.0779	1.0823	-0.12378	18.188	-4.915	11.9164	-0.038819	-0.13354	0.016113	-13.289	48.428	80.765	-0.146	0.13184	0.039551	-98.853	2.297	1415.358	-2.5464	1.1665	-0.18506	2.058	-46.4565	113.095618	-0.026367	0.11865	-0.20459
2.058	57.0108	52.551	1423.366	-2.0664	0.88945	-0.71504	-40.7428	105.139	1263.231	-2.2055	1.048	-0.30518	4.747	-120.682	897.0333	-1.9839	1.1392	-0.14111	35.169	-6.1642	7.1803	-0.044922	-0.12109	0.01709	-35.142	50.2519	79.318	-0.11816	0.11865	0.044922	-56.548	-13.607	1463.055	-2.5171	1.1401	-0.17822	25.621	-1.748	141.4872	-0.092527	0.13208	-0.21557
2.06	27.655	84.799	1384.357	-2.0449	0.87891	-0.70703	-28.2741	145.936	1210.865	-2.1421	1.0161	-0.30566	67.0395	-141.749	927.077	-1.8374	1.1821	-0.17383	7.843	5.8124	4.3477	-0.053223	-0.098145	0.014648	-6.474	22.4102	58.495	-0.099609	0.11475	0.044922	-51.898	49.2242	1433.662	-2.4648	1.0859	-0.16699	48.797	-18.4146	168.98	-0.16699	0.14893	-0.22314
2.062	58.419	20.378	1337.782	-2.019	0.86806	-0.69795	-14.992	54.8594	1186.3281	-2.0783	0.98027	-0.30069	67.2401	-164.922	896.7526	-1.77	1.1743	-0.18506	0.481999999999999	-16.8922	23.0075	-0.055664	-0.089355	0.013184	8.372	64.823	34.1249	-0.074219	0.099121	0.048828	-98.592	10.703	1406.2567	-2.4168	1.0393	-0.16138	35.896	3.021	220.322	-0.26318	0.17676	-0.23242
2.064	49.981	78.89	1294.855	-1.9964	0.85204	-0.69092	32.312	117.831	1195.911	-2.026	0.94492	-0.29668	71.3745	-241.017	914.211	-1.6597	1.103	-0.21924	6.167	35.382	6.27429	-0.058594	-0.067383	0.0083008	-13.196	30.4571	27.262	-0.056641	0.090088	0.052735	-37.838	36.879	1377.165	-2.3628	0.99072	-0.15283	30.733	28.468	278.2261	-0.31494	0.18457	-0.23486
2.066	6.18	52.367	1277.972	-1.9706	0.82939	-0.6831	37.8112	132.842	1184.018	-1.9744	0.91055	-0.28457	115.904	-276.483	987.2103	-1.6025	0.99758	-0.23266	-8.856	16.068	8.886	-0.062012	-0.050781	0.0083008	22.028	24.5006	38.05888	-0.035156	0.077148	0.053711	-98.572	99.147	1304.8008	-2.2866	0.93213	-0.14893	3.729	22.653	366.892	-0.43311	0.20801	-0.24561
2.068	21.245	57.6949	1265.0456	-1.948	0.81201	-0.66259	25.127	69.9065	1174.977	-1.9323	0.88213	-0.27695	55.10675	-299.766	1017.0104	-1.562	0.87744	-0.24365	-2.363	-0.5363	11.7222	-0.06543	-0.032715	0.0039063	3.583	62.392	39.4873	-0.0068359	0.05957	0.058105	-80.041	85.569	1314.91046	-2.248	0.89551	-0.14063	10.247	85.311	458.6659	-0.53906	0.23315	-0.2583
2.07	37.328	147.397	1212.0529	-1.9331	0.79053	-0.64209	35.8086	117.922	1135.82	-1.8809	0.85254	-0.27051	-4.243	-316.407	1074.752	-1.5444	0.72803	-0.25928	-23.312	23.3408	6.1859	-0.061523	-0.012207	0.0043945	7.516	14.16749	40.2483	0.0068359	0.052246	0.062988	-27.7509	156.699	1302.9515	-2.1777	0.83887	-0.13525	14.721	128.883	544.4029	-0.6499	0.26465	-0.27588
2.072	57.5419	93.399	1187.3622	-1.9216	0.77686	-0.62754	23.816	48.629	1086.6737	-1.8345	0.82881	-0.26436	-0.658000000000001	-273.364	1106.514	-1.5488	0.6543	-0.26855	-20.625	-4.7033	25.122	-0.0625	-0.003418	0.0043945	24.08	62.696	16.5981	0.027832	0.034668	0.060059	-89.546	114.229	1267.871	-2.1228	0.802	-0.14087	-8.88	110.9013	650.2663	-0.81934	0.32324	-0.28125
2.074	64.129	140.558	1170.548	-1.9031	0.76182	-0.61084	59.0273	61.868	1076.466	-1.7816	0.80479	-0.2541	-47.361	-268.646	1137.9652	-1.5581	0.55713	-0.28271	-7.762	19.5368	23.1014	-0.055664	0.014648	-0.00097656	-32.76	46.041	-10.3093	0.048584	0.019532	0.070313	-43.577	59.314	1286.73407	-2.0703	0.76465	-0.13867	-19.325	129.588	725.866	-0.91357	0.35596	-0.2793
2.076	29.938	157.26	1142.704	-1.8847	0.75674	-0.59561	86.719	133.9477	1044.8045	-1.7257	0.78486	-0.2498	-53.9	-232.989	1199.4454	-1.5796	0.52246	-0.2915	-53.573694	39.0735	2.25133	-0.04834	0.029541	-0.0026855	-4.012	10.5723	-7.3686	0.062012	0.003418	0.073242	-40.033	96.074	1243.6311	-2.0093	0.72314	-0.13037	-49.229	76.443	759.1193	-1.1035	0.42871	-0.25195
2.078	52.1189	99.2399	1120.25177	-1.8614	0.75224	-0.58213	18.801	67.658	1021.715	-1.6692	0.7622	-0.24053	-60.735	-161.56469	1223.9234	-1.6128	0.51709	-0.3042	-29.9372	0.3864	19.7136	-0.035645	0.038574	-0.0053711	-14.886	54.389	-8.2508	0.083984	-0.011719	0.077148	-64.617	79.904436	1227.745	-1.9805	0.69336	-0.12891	-28.931	13.314	810.9983	-1.2715	0.49073	-0.2312
2.08	28.596	179.474	1095.1506	-1.8242	0.75	-0.56641	39.2203	129.3524	1005.927	-1.6113	0.73926	-0.23145	-91.205	-142.9634	1281.999	-1.6816	0.56641	-0.33594	-26.336	32.005	7.5593	-0.015625	0.046875	-0.012207	-14.764	20.99673	-13.62649	0.092285	-0.018066	0.085449	0.391	134.103	1232.686	-1.9336	0.64453	-0.11377	-13.598	-20.092	842.008	-1.4551	0.57031	-0.18701
2.082	-9.343	125.3347	1081.8755	-1.783	0.7416	-0.55605	46.4285	119.416	940.398	-1.5491	0.71377	-0.22686	-54.046	-106.144	1303.454	-1.7163	0.61377	-0.35645	-52.3393	11.2737	-15.755	-0.003418	0.046875	-0.018066	31.015	26.626	7.5549	0.11572	-0.040039	0.094238	-32.7245	164.924	1190.331893	-1.9021	0.60572	-0.11182	-5.629	-123.731	870.527	-1.7148	0.67188	-0.13867
2.084	-7.017	82.849	1060.652	-1.7445	0.73789	-0.54805	44.38	71.286	927.117	-1.4918	0.68398	-0.21934	-85.938	-82.95	1271.927	-1.7905	0.71826	-0.39404	-14.054	6.81395	4.8661	0.016113	0.048828	-0.03125	-9.615	37.2045	-7.5343	0.12866	-0.049561	0.098634	-37.5146	75.747	1171.1725	-1.8647	0.57373	-0.10547	9.662	-143.08	873.167	-1.8418	0.71973	-0.11084
2.086	-36.372	134.7353	1014.722	-1.6973	0.74766	-0.53672	68.201	164.303	894.842	-1.4332	0.6543	-0.21582	-57.512	-128.119	1299.27	-1.8628	0.83057	-0.43994	-38.142	43.136	-6.687	0.033936	0.043213	-0.042236	-0.950000000000003	-9.6458	-1.1018	0.14355	-0.062012	0.10693	-0.545	92.6727	1142.285	-1.8159	0.53857	-0.10303	-31.2479	-159.783	779.334	-2.1128	0.83838	-0.10205
2.088	-15.015	58.209	978.73581	-1.6476	0.75068	-0.51728	42.814	129.462	883.994	-1.377	0.62422	-0.20801	-21.626	-108.483	1318.283	-1.896	0.88037	-0.46045	-25.9834	20.4047	13.7228	0.043945	0.035156	-0.05127	8.655	27.6568	5.80603	0.16406	-0.080078	0.11328	-24.71811	58.114	1104.9286	-1.791	0.521	-0.10352	-26.4189	-198.371	770.539	-2.2566	0.93677	-0.10254
2.09	4.928	105.014	958.49	-1.5996	0.75195	-0.50391	34.04	151.252	857.3895	-1.3179	0.59326	-0.20605	-85.1248	-121.207	1300.2392	-1.9702	0.97705	-0.49658	10.489	7.0726	45.875	0.058594	0.025391	-0.066895	-10.365	22.4844	-11.276	0.17627	-0.090332	0.11914	22.0126	54.5866	1128.192	-1.7285	0.50537	-0.10645	-39.5224	-123.739	760.6	-2.3452	1.0298	-0.12158
2.092	-44.7218	138.874	918.034	-1.5557	0.73828	-0.46934	2.274	182.778	794.381	-1.2602	0.5498	-0.19356	-51.9562	-131.465	1318.1304	-2.0234	1.0483	-0.52222	-14.526	2.492	39.37176	0.0625	0.013672	-0.073242	29.345	19.8835	27.6351	0.19727	-0.10889	0.11719	34.9136	138.464	1093.5326	-1.6782	0.49952	-0.11059	-52.279	-112.433	769.212	-2.2964	1.1392	-0.12793
2.094	-33.2513	102.955	901.491	-1.506	0.72227	-0.44902	-19.5	104.31	764.093	-1.2008	0.50937	-0.18594	-74.072	-106.318	1316.158	-2.0674	1.1172	-0.54395	7.413	-45.7838	63.8833	0.066406	-0.003418	-0.099121	-1.368	59.473	20.04278	0.21534	-0.11963	0.11157	-6.256	100.1642	1051.398	-1.625	0.49219	-0.11523	-32.65	-107.955	828.2978	-2.2202	1.1841	-0.13525
2.096	-3.414	203.543	847.7986	-1.4572	0.70156	-0.42714	-9.665	162.531	735.696	-1.1465	0.46836	-0.17851	-119.331	-154.925	1373.724	-2.1147	1.2046	-0.57373	-5.924	-12.35	69.512	0.062256	-0.014893	-0.12085	-24.6684	39.96	23.0751	0.23584	-0.13086	0.10742	36.8376	141.228	1014.64444	-1.5576	0.4873	-0.11572	-55.893	-66.696	831.816	-2.0273	1.248	-0.16943
2.098	24.716	174.002	833.304	-1.4061	0.68672	-0.40977	-18.22	174.762	701.0449	-1.0947	0.42891	-0.1707	-53.807	-162.101	1426.296	-2.1323	1.2446	-0.58496	-18.1482	-10.857	71.28949	0.053223	-0.024414	-0.14355	6.343	43.442	25.433	0.25049	-0.13965	0.098633	19.734	175.184	961.4073	-1.5195	0.4834	-0.12207	-102.277	-117.838	863.698	-1.8777	1.2805	-0.20288
2.1	16.9	166.754	829.229	-1.3555	0.68164	-0.3833	-17.724	133.1128	678.8343	-1.0488	0.39453	-0.16602	-71.175	-132.634	1407.413	-2.1538	1.3188	-0.60791	21.058	-43.323	106.5993	0.023438	-0.024902	-0.15771	-31.934	52.175	4.089	0.25977	-0.14844	0.089844	10.564	147.678	968.007	-1.4492	0.46875	-0.12256	-86.582	-102.322	891.737	-1.7461	1.2559	-0.25
2.102	6.847	232.098	780.3237	-1.3093	0.67432	-0.3624	-40.168	200.193	637.939	-0.99825	0.36816	-0.16016	-44.7393	-145.787	1443.49	-2.1563	1.3608	-0.63086	37.883	-23.691	106.79298	-0.0090332	-0.026367	-0.16309	-11.589	14.9179	34.4237	0.27393	-0.15771	0.075684	46.148	217.782	942.556	-1.395	0.45899	-0.12232	-36.5748	-83.45	888.3738	-1.6304	1.1294	-0.29346
2.104	-3.356	174.7861	752.552	-1.2601	0.67071	-0.3375	-55.6765	134.19	634.7884	-0.95586	0.34688	-0.15693	-6.675	-106.626	1444.178	-2.1499	1.3989	-0.64795	15.8	-82.0236	146.7974	-0.050781	-0.022949	-0.17285	-1.871	41.266	23.0777	0.28394	-0.16309	0.064941	-25.6232	187.122	891.38111	-1.3438	0.44434	-0.1167	-24.812	-116.85	923.248	-1.5786	0.97118	-0.31421
2.106	-25.2757	212.414	702.162	-1.2133	0.65899	-0.31524	-10.971	135.0851	630.4188	-0.90547	0.32773	-0.15029	-52.471	-95.999	1414.1766	-2.1348	1.4258	-0.66602	39.179	-72.687	197.2713	-0.12109	-0.02002	-0.18066	-17.917	31.061	8.5643	0.28857	-0.16699	0.049805	-2.361	160.176	878.3462	-1.2788	0.43018	-0.11914	37.199	-91.96	914.577	-1.5605	0.79102	-0.32617
2.108	-54.178	212.365	679.859	-1.1655	0.64277	-0.29179	3.349	160.173	591.1698	-0.86699	0.30762	-0.14668	25.899	-110.5098	1428.419	-2.1357	1.4297	-0.66699	15.115	1.687	242.2441	-0.16553	-0.015137	-0.19238	17.195	27.318	14.2711	0.28662	-0.17529	0.039551	-8.294	173.532	838.6696	-1.2471	0.42139	-0.11572	36.5491	-137.255	903.947	-1.564	0.56396	-0.35059
2.11	-13.649	153.773	665.8536	-1.1226	0.62744	-0.27197	-11.494	104.2267	561.048	-0.82227	0.28223	-0.14063	43.533	-57.083	1409.4033	-2.1265	1.4399	-0.67725	38.269	16.7338	311.7984	-0.25049	-0.0063477	-0.21826	-5.332	40.866	19.9955	0.28076	-0.17871	0.027832	-36.2834	112.9852	814.0781	-1.1797	0.40527	-0.11279	15.033	-204.625	941.443	-1.5776	0.46338	-0.3623
2.112	-4.955	221.509	607.8955	-1.0736	0.60899	-0.24824	-15.483	174.109	530.4214	-0.78154	0.26357	-0.13418	-12.75959	-65.336	1408.701	-2.1247	1.4289	-0.67847	37.174	104.573	387.531	-0.32568	0.0048828	-0.24023	-10.58	14.7591	29.2608	0.27002	-0.17578	0.017578	10.017	155.33	793.49	-1.1299	0.39355	-0.11377	28.4745	-216.2339	997.859	-1.6265	0.31396	-0.37451
2.114	-9.6137	179.98	574.2869	-1.0261	0.58955	-0.2333	-3.018	180.519	491.4885	-0.74326	0.24239	-0.12793	36.026	-67.616	1414.2032	-2.1245	1.4146	-0.68018	0.381	119.973	475.798	-0.40576	0.020996	-0.26563	13.987	14.9071	45.183	0.25245	-0.16944	0.0075684	-30.0144	188.08	742.116	-1.0757	0.38916	-0.11133	-9.0906	-289.322	1094.839	-1.6785	0.25586	-0.37305
2.116	-20.6	155.8673	548.4068	-0.97764	0.56767	-0.21104	23.197	135.906	478.1941	-0.7042	0.21895	-0.11933	-5.9646	-11.813	1359.514	-2.1343	1.395	-0.66455	15.827	90.5746	560.718	-0.52686	0.045898	-0.29346	-24.045	34.7358	16.70688	0.23389	-0.1582	0.00048828	-46.01226	163.39	725.0746	-1.0117	0.37305	-0.11182	-31.4211	-295.283	1181.255	-1.7466	0.24023	-0.36621
2.118	-40.0658	203.326	533.975	-0.92715	0.54785	-0.19317	44.663	188.789	439.37095	-0.66885	0.20088	-0.11162	-3.8097	-27.8	1374.548	-2.146	1.3872	-0.66357	-7.27	111.404	598.222	-0.5957	0.05957	-0.30469	-8.886	5.6298	34.389	0.21777	-0.14453	-0.003418	-12.048	198.006	699.763	-0.97461	0.3667	-0.1123	-70.716	-258.484	1203.4	-1.8491	0.3042	-0.36182
2.12	9.5835	136.819	532.3315	-0.88477	0.52979	-0.17871	35.485	116.8615	425.6623	-0.63184	0.17773	-0.104	19.7481	1.243	1373.344	-2.1733	1.3784	-0.64502	3.524	45.202	659.843	-0.75537	0.10596	-0.31787	5.544	10.1471	44.53	0.20947	-0.13867	-0.0019531	-53.73634	152.73	669.216	-0.90723	0.34375	-0.10254	-95.217	-273.493	1230.92	-1.8965	0.36426	-0.36816
2.122	51.327	172.907	506.5976	-0.84248	0.50596	-0.16221	56.149	125.7174	412.948	-0.59414	0.16093	-0.097852	-41.946	6.56163	1362.99	-2.1999	1.3826	-0.63648	0.866	19.63	729.383	-0.88501	0.14185	-0.31226	-20.136	-3.2115	40.7114	0.19385	-0.11182	-0.010742	-2.57700000000001	126.837	672.592	-0.85401	0.32764	-0.10767	-49.8344	-193.952	1279.554	-1.9707	0.51563	-0.37402
2.124	6.2063	171.076	476.012	-0.79922	0.48555	-0.1498	72.90175	164.8789	365.7991	-0.55498	0.1417	-0.093262	-9.7437	-17.4252	1406.2734	-2.2261	1.3931	-0.62744	-16.034	11.27	732.72	-1.022	0.1748	-0.29932	7.322	-12.1136	34.55	0.18408	-0.089355	-0.0080567	-5.914	158.355	636.798	-0.80762	0.30859	-0.10303	-46.94511	-129.41553	1289.049	-2.0086	0.62183	-0.3816
2.126	-8.3704	132.5544	472.254	-0.7586	0.46289	-0.13457	48.68	118.1314	341.093	-0.51553	0.11943	-0.084277	-16.8437	33.4	1400.8971	-2.2598	1.4043	-0.61914	17.937	-75.052	713.52	-1.2246	0.22949	-0.27588	-13.434	16.4195	17.31682	0.17529	-0.07373	-0.016113	-54.4585	118.09914	619.477	-0.74268	0.27734	-0.10449	-21.6447	-116.36	1349.4	-2.0425	0.71533	-0.38428
2.128	-42.8345	190.634	445.208	-0.71875	0.44687	-0.11797	52.281	159.566	315.658	-0.47588	0.098928	-0.079297	-67.105	0.471	1407.20478	-2.2754	1.4072	-0.60938	0.633999999999997	-72.973	651.0577	-1.3301	0.26465	-0.25781	-16.067	-2.63977	22.438	0.17383	-0.053711	-0.022461	-1.727	164.9547	586.386	-0.71631	0.26611	-0.10449	32.7456	-64.779	1376.754	-2.0874	0.8042	-0.40186
2.13	-53.848	158.177	413.745	-0.68311	0.43066	-0.10596	71.2296	126.991	294.3987	-0.43848	0.074707	-0.074219	-27.6879	-4.261	1414.5629	-2.2905	1.4106	-0.59326	-36.214	-100.697	651.7377	-1.562	0.33643	-0.22461	18.274	-15.51437	25.8527	0.17871	-0.04248	-0.023438	-32.9772	186.147	520.55188	-0.66211	0.24219	-0.104	16.49262	-86.797	1364.1121	-2.1182	0.83203	-0.4082
2.132	-27.3532	141.0424	382.4926	-0.6418	0.41055	-0.095508	65.5972	91.8853	287.2459	-0.40058	0.052441	-0.069727	-40.2571	31.8705	1407.261	-2.2966	1.4026	-0.57202	3.2224	-133.573	709.0665	-1.7439	0.40406	-0.21436	-3.88	18.8817	9.60971	0.18213	-0.019043	-0.03418	-5.832	146.77725	506.3187	-0.61939	0.23072	-0.10181	47.648	-78.751	1394.337	-2.1992	0.88281	-0.41943
2.134	-45.6509	165.709	326.977	-0.60303	0.39306	-0.086328	79.2482	144.685	247.8819	-0.36231	0.031836	-0.065821	-66.939	-13.695	1419.7	-2.2969	1.3906	-0.55273	-4.4336	-50.878	757.44	-1.939	0.49854	-0.22705	21.0453	-4.335	3.52235	0.18677	-0.0068357	-0.039795	24.842	181.326	465.452	-0.57764	0.21631	-0.104	74.778	-27.274	1380.5084	-2.2719	0.91113	-0.43164
2.136	-30.5847	96.582	300.47	-0.56397	0.37471	-0.079297	71.493	103.807	247.4338	-0.32598	0.011133	-0.060352	-43.9981	13.745	1416.069	-2.2974	1.3696	-0.52197	-18.57761	-81.937	794.8202	-2.1543	0.63477	-0.26172	22.496	8.5726	-2.0926	0.19434	0.0019531	-0.043945	-18.179	143.6243	429.0614	-0.53076	0.19434	-0.10596	-7.586	-43.179	1384.753	-2.3457	0.93359	-0.44531
2.138	-35.3051	130.8831	262.582	-0.51699	0.35263	-0.070899	60.5542	118.845	245.894	-0.29238	-0.0023437	-0.057324	-84.946	29.08	1379.248	-2.2886	1.3521	-0.50439	-41.7406	-117.163	834.083	-2.209	0.70117	-0.2666	-23.102	8.1787	-16.7806	0.20557	0.014648	-0.053711	15.422	138.2077	417.547	-0.50781	0.18262	-0.10645	-22.753	-27.482	1438.9052	-2.4414	0.95508	-0.46484
2.14	-62.869	137.421	246.0621	-0.47656	0.3291	-0.058594	54.94	128.215	210.9924	-0.26221	-0.018555	-0.057129	-70.918	-30.2672	1395.349	-2.2632	1.3091	-0.47314	-70.3266	-122.5231	841.995	-2.2515	0.82275	-0.28564	6.686	-4.9823	4.72	0.20752	0.018066	-0.057617	21.8946	171.401	374.608	-0.45752	0.16357	-0.10693	-57.6897	-18.3308	1400.817	-2.4707	0.96289	-0.48242
2.142	-36.37425	90.9389	254.794	-0.43174	0.30908	-0.065723	33.005	63.0348	192.5217	-0.2335	-0.038086	-0.048926	-65.189	24.0875	1371.51	-2.2368	1.2695	-0.44654	-56.8154	-174.6037	893.198	-2.2204	0.90942	-0.27563	-2.152	40.992	-8.274	0.21094	0.029297	-0.0625	12.005	106.8411	374.7527	-0.4253	0.14966	-0.10937	-90.858	-80.976	1433.957	-2.4844	0.96875	-0.51172
2.144	-28.877	125.448	233.457	-0.39336	0.28379	-0.046094	13.867	91.108	180.1662	-0.20205	-0.05293	-0.050976	-127.303	4.1118	1361.973	-2.2109	1.2266	-0.43262	1.784	-113.212	935.2564	-2.1636	0.99658	-0.26758	-6.34	16.0683	7.9671	0.21631	0.035644	-0.063721	60.3747	132.6476	348.0144	-0.39209	0.13818	-0.11768	-8.681	-48.353	1496.4256	-2.4731	0.9668	-0.53467
2.146	-22.1627	86.283	216.4615	-0.35703	0.25566	-0.040235	-9.867	74.958	165.3632	-0.17197	-0.069336	-0.048632	-70.111	15.004	1351.516	-2.1714	1.1704	-0.40479	3.705	-74.255	966.1282	-2.0723	1.1016	-0.2793	25.609	-3.382	30.061	0.21777	0.039063	-0.069824	33.913	134.4003	301.606	-0.35303	0.12061	-0.10352	-26.771	-81.663	1509.754	-2.4409	0.96729	-0.56396
2.148	-8.061	84.7753	189.448	-0.32725	0.23653	-0.029492	-9.528	56.26906	185.269	-0.14668	-0.078418	-0.045898	-106.58	101.522	1305.7803	-2.1538	1.145	-0.396	34.877	-107.501	984.2023	-2.0234	1.1475	-0.27783	-29.927	20.2531	2.098	0.21533	0.041992	-0.068359	32.458	121.3264	290.606	-0.33301	0.1084	-0.10889	-6.161	-121.307	1558.565	-2.3809	0.95703	-0.59375
2.15	-27.8979	150.497	165.339	-0.30078	0.21875	-0.019531	-21.941	99.22	149.621	-0.12549	-0.085449	-0.048828	-103.742	69.698	1313.761	-2.1167	1.1021	-0.37451	18.986	-115.731	962.4763	-1.9404	1.2012	-0.27686	-16.322	-15.9192	-2.879	0.21436	0.038086	-0.064453	37.387	171.881	272.443	-0.2915	0.091309	-0.11133	34.721	-86.6527	1526.953	-2.3511	0.95557	-0.60498
2.152	-27.5671	96.651	153.0956	-0.27559	0.20684	-0.0071288	-50.3292	61.944	124.5068	-0.10264	-0.094141	-0.048047	-25.067772	101.233	1294.549	-2.1004	1.0765	-0.3562	23.956	-191.848	974.951	-1.8972	1.1838	-0.29029	9.635	15.7134	-9.8341	0.20166	0.041504	-0.063965	8.266	131.694	270.4265	-0.26636	0.070801	-0.11157	7.362	-124.1744	1500.371	-2.292	0.9375	-0.63184
2.154	-28.301	103.766	117.8241	-0.25469	0.19766	0.0048828	-50.41	66.122	117.845	-0.085645	-0.10244	-0.044824	-76.686	104.023	1261.741	-2.0742	1.0557	-0.34375	43.686	-230.482	1065.099	-1.8579	1.1216	-0.29541	-17.771	16.6448	-13.5853	0.20068	0.074463	-0.070068	48.1457	107.326	264.421	-0.24072	0.057129	-0.11523	85.5839	-99.24	1531.119	-2.2478	0.92017	-0.64282
2.156	-43.1824	70.224	83.0099	-0.23633	0.18438	0.014649	-47.486	66.415	70.2842	-0.066113	-0.10634	-0.044434	-36.7606	56.0911	1288.302	-2.0405	1.0278	-0.32715	25.267	-199.746	1135.96	-1.8042	0.97119	-0.31982	4.034	-13.8537	-3.6871	0.20947	0.086426	-0.05957	36.729	98.163	213.1002	-0.20508	0.030762	-0.10938	62.1545	-53.902	1491.3299	-2.2031	0.9043	-0.64648
2.158	4.482	2.703	98.797	-0.20938	0.18174	0.021191	-34.386	22.698	76.8874	-0.050782	-0.10918	-0.040625	3.159	119.455	1244.901	-2.0176	1.0137	-0.32129	0.504999999999999	-247.495	1209.836	-1.7808	0.88135	-0.33545	10.024	26.725	-22.7066	0.2041	0.091309	-0.055664	1.66	44.558	202.6503	-0.18799	0.019531	-0.10791	8.088	-75.477	1490.715	-2.1499	0.87158	-0.65088
2.16	-12.447	54.506	85.292	-0.18115	0.17188	0.026367	-5.958	59.204	81.7486	-0.033203	-0.10889	-0.037598	-27.5449	76.746	1213.34	-1.9707	0.97852	-0.2998	-33.446	-222.777	1235.261	-1.7437	0.70557	-0.36377	-27.2155	13.3689	-15.2052	0.20166	0.093262	-0.054199	6.739	78.023	196.231	-0.15723	-0.0039063	-0.10059	17.76	-17.224	1493.5342	-2.127	0.85547	-0.64844
2.162	2.515	35.1852	73.032	-0.15175	0.16387	0.032617	-44.0689	41.5981	74.659	-0.019434	-0.11514	-0.037402	35.6874	64.7825	1196.4619	-1.9329	0.95728	-0.28857	-54.5637	-179.023	1236.134	-1.7498	0.59643	-0.3816	4.127	23.848	11.2488	0.17871	0.091797	-0.047363	-16.106	86.6677	168.272	-0.13794	-0.018555	-0.097654	-63.187	-6.366	1451.971	-2.0859	0.82422	-0.63672
2.164	37.594	38.43944	72.279	-0.12324	0.14853	0.036914	-42.5269	29.0805	80.723	-0.0072265	-0.11845	-0.034277	-1.168	94.228	1165.3281	-1.8901	0.93408	-0.27197	-13.303	-178.293	1288.0828	-1.7754	0.51709	-0.39209	-1.343	59.11	8.4184	0.16235	0.096925	-0.045654	-15.462	82.752	166.41	-0.12109	-0.033691	-0.096191	-47.1557	-2.073	1468.2242	-2.0622	0.80493	-0.63183
2.166	7.948	74.213	13.226	-0.093946	0.13916	0.040039	-18.264	71.648	40.3682	0.0076172	-0.1208	-0.032324	7.978	29.954	1162.6579	-1.832	0.89844	-0.25293	6.278	-100.29	1335.4348	-1.8574	0.46924	-0.3877	-5.575	29.28959	17.4158	0.14209	0.10498	-0.036133	-5.06	106.506	130.995	-0.093262	-0.050781	-0.090332	-14.392	71.2206	1425.80768	-2.0386	0.79004	-0.62451
2.168	23.217	12.6978	14.261	-0.067383	0.13262	0.043164	-33.8257	39.9921	37.84042	0.025098	-0.12022	-0.033496	50.9882	66.927	1149.0512	-1.7964	0.87939	-0.24756	-0.0989999999999966	-84.544	1356.027	-1.9077	0.46924	-0.38037	-4.883	47.617	11.3993	0.10986	0.12256	-0.029297	-38.7346	77.112	108.742	-0.08252	-0.058105	-0.090332	-22.605	37.812	1411.0148	-2.0171	0.77393	-0.61279
2.17	30.473	41.793	-6.099	-0.046387	0.12939	0.046387	-3.346	59.864	50.8602	0.041504	-0.12012	-0.029785	-1.6462	90.7805	1109.0521	-1.7285	0.8457	-0.24219	19.459	-102.838	1396.855	-2.0176	0.51367	-0.36328	-26.478	48.775	-0.5374	0.093262	0.12842	-0.025879	3.904	74.001	129.825	-0.056152	-0.064941	-0.092285	-4.79	42.558	1426.976	-2.0059	0.77148	-0.61133
2.172	15.248	41.755	-5.4872	-0.02334	0.1208	0.05127	-16.914	64.306	28.743	0.053711	-0.11787	-0.028125	15.6304	59.685	1110.6751	-1.6746	0.81275	-0.23365	37.34978	-55.737	1372.784	-2.094	0.57837	-0.34936	1.336	32.416	9.6135	0.063477	0.14844	-0.015137	-23.134	89.258	90.8497	-0.034668	-0.074219	-0.086426	-27.773	71.885	1396.3031	-1.9761	0.75635	-0.59619
2.174	38.702	13.725	30.669	-0.0041993	0.11191	0.05459	-1.866	9.73554	27.7212	0.065039	-0.11767	-0.026074	36.84139	121.653	1068.6974	-1.6187	0.77686	-0.22949	58.674	-100.176	1386.7636	-2.1523	0.65234	-0.34766	-1.709	64.774	-0.9453	0.037353	0.16113	-0.0078125	-55.49834	71.585	99.2857	-0.011719	-0.078125	-0.085938	-13.484	13.9743	1390.513	-1.9539	0.75123	-0.5896
2.176	23.977	56.063	22.682	0.012207	0.10254	0.055761	40.5105	20.98111	16.3292	0.075586	-0.11377	-0.020215	-19.338	97.134	1050.1574	-1.5527	0.72949	-0.22412	76.719	-88.956	1400.2923	-2.2188	0.75	-0.3418	-19.917	37.1937	-0.431000000000001	0.0078125	0.17725	-0.00097656	-0.0830000000000055	95.734	88.6298	0.013672	-0.083984	-0.083496	60.9316	50.7365	1379.805	-1.9395	0.74414	-0.58398
2.178	-16.986	24.1666	20.5282	0.027735	0.093066	0.058399	33.6668	-10.936	19.47496	0.086328	-0.11397	-0.013184	17.264	102.1478	1023.5607	-1.5176	0.71191	-0.21973	52.565	-35.453	1382.29	-2.2495	0.79541	-0.34668	-8.651	19.0637	35.5915	-0.024414	0.19141	0.012207	-37.3868	69.664	68.1986	0.026855	-0.088867	-0.084961	25.548	30.034	1365.216	-1.9194	0.73096	-0.57373
2.18	-9.67	7.037	10.5592	0.037598	0.080078	0.064453	22.942	-17.0187	25.2446	0.09375	-0.1123	-0.0068359	-0.556000000000001	162.577	993.7585	-1.4507	0.6665	-0.2124	12.141	-68.3328	1398.909	-2.291	0.88086	-0.36084	-4.943	23.5447	39.9469	-0.041992	0.20654	0.01709	-35.333	42.844	64.3887	0.050781	-0.094238	-0.083008	30.874	-14.041	1375.5159	-1.9082	0.7207	-0.57324
2.182	-0.423999999999999	43.422	-0.398	0.04668	0.070703	0.064258	59.91688	43.541	-2.7514	0.10411	-0.11084	0.00097658	-3.179	126.19	968.169	-1.406	0.63452	-0.20727	-8.24	-14.676	1418.6444	-2.3252	0.93067	-0.37158	15.639	-42.2575	76.778	-0.07959	0.22656	0.020508	-18.997	68.631	47.4129	0.069824	-0.098634	-0.081543	49.0033	33.31665	1352.643	-1.8921	0.71143	-0.56104
2.184	9.634	1.6288	12.0262	0.054395	0.056933	0.067285	48.4484	27.2289	-4.7889	0.11347	-0.10918	0.010351	3.9629	161.943	937.7984	-1.3628	0.60596	-0.20166	-24.137	-33.3773	1455.6104	-2.3574	0.97461	-0.38672	15.321	-20.899	84.814	-0.11011	0.24365	0.022705	-39.7783	58.21	40.5889	0.088379	-0.10645	-0.077148	-21.276	-2.0286	1323.342	-1.8826	0.69946	-0.54712
2.186	14.657	41.975	8.641	0.060254	0.047559	0.075879	37.018	40.248	18.11536	0.11973	-0.1084	0.01543	-43.5728	186.231	893.13	-1.3047	0.57227	-0.1958	-3.903	-94.874	1532.726	-2.3965	1.0156	-0.41211	-28.867	-15.68	83.1062	-0.14746	0.25781	0.019043	12.667	46.249	52.7563	0.10059	-0.1167	-0.071289	22.185	7.866	1345.026	-1.8804	0.69385	-0.53613
2.188	-11.121	37.524	-14.675	0.064648	0.037598	0.078711	42.6942	37.1929	2.964	0.12569	-0.11045	0.021778	-35.1043	144.839	895.329	-1.2764	0.56055	-0.1958	20.681	-60.191	1529.422	-2.4077	1.0317	-0.42627	11.13	-49.8	132.809	-0.19824	0.28662	0.021484	-12.201	52.924	23.4432	0.10645	-0.12061	-0.066406	22.744	57.226	1297.607	-1.8711	0.68945	-0.51953
2.19	-2.432	-15.9646	-2.1512	0.069336	0.030273	0.095215	14.272	-0.61463	19.0519	0.13525	-0.10986	0.023926	-30.8356	191.719	842.413	-1.2109	0.53516	-0.1875	8.748	-98.604	1513.976	-2.4316	1.0439	-0.45996	-9.05	-22.261	176.8614	-0.2251	0.2959	0.021973	-8.844	5.5331	31.9568	0.11768	-0.12695	-0.060547	-19.365	13.428	1263.262	-1.8594	0.69531	-0.51758
2.192	-14.599	25.3795	8.4045	0.075	0.012403	0.09209	52.1437	41.51	11.06108	0.146	-0.11094	0.031543	-79.264	137.873	810.699	-1.1643	0.52173	-0.18286	28.321	-78.687	1509.811	-2.4373	1.0384	-0.47998	-41.107	-68.3094	270.3555	-0.29102	0.31641	0.017578	45.4665	12.5575	32.204	0.11914	-0.13721	-0.047852	27.051	72.012	1229.205	-1.8262	0.70313	-0.50391
2.194	1.951	1.17	27.3032	0.083105	0.0021485	0.09873	29.7702	19.1814	-2.8656	0.15498	-0.10987	0.034082	-51.1582	144.748	801.123	-1.1152	0.50391	-0.17871	39.264	-6.155	1486.26	-2.4292	1.0269	-0.50342	-20.5061	-63.3666	398.891	-0.34937	0.33301	0.0085447	15.006	26.632	23.7446	0.11768	-0.13867	-0.047363	-33.223	89.075	1173.2793	-1.7934	0.70849	-0.49463
2.196	-1.468	20.2851	47.3218	0.087012	-0.0076172	0.10967	-5.304	0.5297	16.45618	0.16123	-0.1083	0.038769	-66.8779	199.791	772.42125	-1.0405	0.48682	-0.17432	59.961	-50.29	1516.93775	-2.3999	0.98877	-0.52881	-86.137	-19.171	480.293	-0.41602	0.34766	-0.003418	18.579	14.7596	50.352	0.1167	-0.14795	-0.034668	-11.368	79.601	1170.4751	-1.7539	0.69629	-0.48438
2.198	-22.032	65.069	24.617	0.089453	-0.017481	0.11553	-17.822	49.123	-0.294	0.16777	-0.10957	0.043262	-73.94	149.227	771.653	-1.0083	0.479	-0.17188	82.184	-5.11	1525.0213	-2.3789	0.9707	-0.53906	-86.784	-42.1468	534.9933	-0.51953	0.36621	-0.01709	41.0971	45.209	23.531	0.11035	-0.14673	-0.0271	41.3641	153.146	1130.649	-1.6968	0.68701	-0.47119
2.2	-23.514	25.036	30.6469	0.089355	-0.029297	0.12744	1.083	19.3205	0.797000000000001	0.17383	-0.11084	0.045898	-41.07531	184.674	738.018	-0.93896	0.46143	-0.16992	60.9692	-2.77099999999999	1510.3263	-2.3262	0.91699	-0.55762	-82.155	-11.3806	573.348	-0.58398	0.37891	-0.021973	-15.19	24.464	14.8979	0.10547	-0.14648	-0.020508	-4.276	117.236	1092.644	-1.6719	0.67969	-0.45752
2.202	-35.627	49.827	26.0039	0.09375	-0.033106	0.13613	0.542000000000002	53.207	29.8954	0.18203	-0.1124	0.050684	-76.086	177.733	710.4249	-0.8855	0.44263	-0.1565	25.775	-44.167	1530.703	-2.2917	0.88111	-0.57055	-98.87	-22.254	607.158	-0.71729	0.40527	-0.035645	30.566	8.54099	22.2369	0.1001	-0.14844	-0.012695	39.8326	127.35	1087.8693	-1.623	0.67285	-0.44336
2.204	-50.8816	44.084	5.722	0.099902	-0.037012	0.14443	-31.1951	51.79	20.4982	0.18291	-0.11494	0.055079	-26.7615	139.324	701.4055	-0.83105	0.42188	-0.15283	8.925	42.225	1517.093	-2.2534	0.84521	-0.57764	-6.071	-68.38008	675.446	-0.86768	0.43066	-0.04541	29.37	28.302	-11.938	0.09668	-0.14111	-0.0087891	35.365	166.814	1046.4547	-1.5859	0.67188	-0.42456
2.206	-0.228000000000002	10.5426	18.144	0.1124	-0.045214	0.15108	-45.7259	15.6484	30.6512	0.1876	-0.11611	0.058594	-26.358	183.883	676.62	-0.77002	0.40283	-0.13867	-14.997	40.0213	1497.5913	-2.2104	0.79834	-0.57959	-4.741	-31.02	665.961	-0.95313	0.44775	-0.044922	0.658999999999999	-0.9778	8.9898	0.088379	-0.13721	-0.0019531	-10.219	120.958	1047.2864	-1.5464	0.67236	-0.40576
2.208	-1.635	46.9166	6.0157	0.12842	-0.053711	0.15645	-28.3881	43.7275	6.45748	0.18672	-0.12178	0.057519	-57.4897	156.319	649.611	-0.74023	0.38867	-0.1377	17.092	57.4371	1495.7983	-2.189	0.77588	-0.5835	-45.214	-56.749	656.219	-1.1128	0.48096	-0.039551	35.354	38.385	13.0705	0.089844	-0.13086	0.0036621	40.9733	166.101	1026.9658	-1.4897	0.65869	-0.38965
2.21	-15.285	11.6622	17.3658	0.14355	-0.061035	0.1582	-53.2629	8.543	-6.2808	0.18408	-0.12158	0.062988	3.991	162.242	611.848	-0.68652	0.36426	-0.11768	13.127	101.504	1461.7287	-2.1582	0.73633	-0.58398	11.67	-62.0933	659.264	-1.24	0.50318	-0.03711	-11.075	39.941	-10.247	0.087891	-0.12695	0.0063477	-25.5966	133.851	980.2714	-1.4546	0.65088	-0.37451
2.212	13.488	10.229	38.6623	0.16552	-0.068261	0.16152	-39.425	2.342	33.579	0.18095	-0.12871	0.066601	14.547	184.572	552.5179	-0.64673	0.34864	-0.11011	1.33199999999999	3.886	1471.0678	-2.1386	0.71191	-0.58398	20.24	-41.701	631.876	-1.3633	0.53125	-0.040527	1.563	7.756	24.4032	0.086914	-0.11279	0.01416	-34.8705	86.382	980.5584	-1.3921	0.62744	-0.36279
2.214	-9.098	37.9906	39.743	0.18642	-0.077832	0.16026	-36.755	30.7952	35.879	0.17217	-0.13037	0.071485	21.86	140.8417	529.2129	-0.60547	0.32959	-0.098145	19.866	39.5809	1491.408	-2.1226	0.69287	-0.57959	33.522	-54.338	653.509	-1.5313	0.56641	-0.062988	24.55	30.7832	15.8593	0.085938	-0.11328	0.018066	-18.2	120.312	933.716	-1.3381	0.60718	-0.34448
[truncated: 11,892 more rows]
