# Supplementary material for: Reliability and Validity of Running Cadence and Stance Time Derived from Instrumented Wireless Earbuds
Source: Sensors (Basel). 2021 Nov 30;21(23):7995. doi: 10.3390/s21237995 (PMC8659722; doi:10.3390/s21237995)
Supplement: Supplementary file 1 [file sensors-21-07995-s001.zip › Data_P14_speeds_1.csv]

time	S7kmh_force_plate_1	S7kmh_force_plate_2	S7kmh_force_plate_3	S7kmh_earbuds_1	S7kmh_earbuds_2	S7kmh_earbuds_3	S10kmh_force_plate_1	S10kmh_force_plate_2	S10kmh_force_plate_3	S10kmh_earbuds_1	S10kmh_earbuds_2	S10kmh_earbuds_3	S13kmh_force_plate_1	S13kmh_force_plate_2	S13kmh_force_plate_3	S13kmh_earbuds_1	S13kmh_earbuds_2	S13kmh_earbuds_3	max_force_plate_1	max_force_plate_2	max_force_plate_3	max_earbuds_1	max_earbuds_2	max_earbuds_3
0	23.958	-1.4308	24.9829	0.129	-0.10625	-0.025202	16.2647	115.714	119.839	-0.037109	-0.096191	-0.041992	65.844	141.0393	1073.18	-1.5566	0.60547	-0.28271	10.441	168.055	280.5922	0.12793	-0.27881	-0.071777
0.002	29.1746	-15.783	43.1041	0.13378	-0.10537	-0.026855	10.6298	53.5442	120.5435	-0.015137	-0.089844	-0.042969	44.2897	139.778	1065.2335	-1.5132	0.59424	-0.26709	6.84231	174.2754	241.115	0.1708	-0.30654	-0.06709
0.004	45.287	-22.682	36.1341	0.13379	-0.10537	-0.028025	33.689433	48.7387	121.0273	-0.0087891	-0.09082	-0.040527	83.399	162.825	1033.067	-1.4316	0.58203	-0.24463	-1.039	159.0458	193.812	0.19267	-0.33223	-0.069824
0.006	33.83964	-15.329	28.544	0.13408	-0.10762	-0.029785	-7.5321	72.775	112.424	0.010742	-0.09668	-0.039063	79.4039	157.1765	993.7596	-1.375	0.57324	-0.22143	6.054	126.3586	136.064	0.18252	-0.34317	-0.082715
0.008	27.06	-8.692	55.6795	0.13135	-0.10742	-0.029785	27.355	9.174	115.235	0.026367	-0.092041	-0.037353	88.851	193.6	943.214	-1.3208	0.56885	-0.20459	-23.912	82.381	105.0739	0.1418	-0.34092	-0.10654
0.01	28.041	-9.8788	74.404	0.1293	-0.10645	-0.035354	6.8614	47.2873	86.5373	0.037109	-0.095703	-0.034668	59.539	150.9682	919.4134	-1.2456	0.56201	-0.18506	6.124	89.4656	94.9867	0.09375	-0.32471	-0.12598
0.012	29.88	-4.8338	84.039	0.12587	-0.10704	-0.03838	-11.1399	44.165	49.989	0.038086	-0.089355	-0.033203	50.38	201.229	895.172	-1.2065	0.5542	-0.17676	-7.1388	101.7488	64.713	0.056836	-0.30322	-0.13076
0.014	11.403	2.3681	100.01	0.1208	-0.10507	-0.041114	5.809	20.1895	44.327	0.036621	-0.089355	-0.036621	39.739	140.31	865.975	-1.1382	0.54541	-0.15234	4.25716	104.136	66.916	0.026758	-0.28662	-0.13017
0.016	12.354	-2.4718	124.0391	0.10898	-0.097554	-0.048537	-13.2801	58.713	39.9216	0.044434	-0.08252	-0.035156	7.606	204.2233	827.3361	-1.0837	0.53101	-0.13794	20.36311	91.1657	59.829	0.0044921	-0.27412	-0.12627
0.018	1.55500000000001	15.5142	166.851	0.097168	-0.082031	-0.058594	-15.8202	20.3012	40.2863	0.048584	-0.080811	-0.027099	9.904	161.463	774.796	-1.0254	0.52148	-0.1333	-26.5358	62.427	43.915	-0.0085937	-0.26484	-0.12012
0.02	-5.542	63.208	221.3818	0.081837	-0.057716	-0.069432	-5.234	13.7027	34.1311	0.052734	-0.084473	-0.017578	-45.569	201.512	734.088	-0.95264	0.50244	-0.11865	8.81	69.754	23.253	-0.025391	-0.25	-0.10986
0.022	11.44	102.45	272.9152	0.057717	-0.033889	-0.080272	-35.1325	31.9272	22.693	0.052734	-0.084473	-0.01123	-50.181	171.0407	670.131	-0.91602	0.49316	-0.11133	25.151	57.264	27.231	-0.054395	-0.22119	-0.10547
0.024	14.441	105.759	327.906	0.032326	-0.00068564	-0.095507	-20.3525	-6.45073	20.70066	0.046875	-0.08252	-0.0058594	-57.4577	198.202	646.9	-0.84033	0.47803	-0.09668	24.4228	53.6177	33.0723	-0.081934	-0.19052	-0.10528
0.026	2.584	68.847	379.224	9.4696e-07	0.03828	-0.11172	-23.292	41.406	2.8501	0.050293	-0.078613	0.003418	-23.6325	190.83	602.64	-0.78931	0.46558	-0.093995	7.5847	23.6172	34.2409	-0.11006	-0.15342	-0.097071
0.028	-21.585	65.788	424.426	-0.041016	0.077148	-0.11963	-40.134	47.464	-7.5187	0.043213	-0.081543	0.01001	-56.6444	196.507	594.3167	-0.7373	0.44824	-0.083984	19.96534	9.1048	21.4382	-0.12852	-0.11973	-0.087891
0.03	-16.159	48.027	496.443	-0.083985	0.12246	-0.13164	3.1717	14.8453	-7.7744	0.033203	-0.078613	0.016602	-59.192	195.823	546.619	-0.67383	0.42725	-0.070801	26.504	0.5491	17.7585	-0.14258	-0.088867	-0.069824
0.032	-4.407	37.3591	553.345	-0.13682	0.16006	-0.14297	-7.2517	42.16	-8.2903	0.030762	-0.07373	0.02832	-77.716	197.058	524.1736	-0.63574	0.41406	-0.076172	33.4707	23.0149	30.2758	-0.15576	-0.062305	-0.058203
0.034	3.129	11.247	591.843	-0.19385	0.19561	-0.16328	2.6568	-18.3876	8.826	0.026367	-0.072754	0.038086	-64.267	234.843	474.003	-0.58008	0.39258	-0.063477	53.191	47.98	3.3495	-0.17149	-0.038183	-0.048828
0.036	-8.281	-15.266	566.2921	-0.25303	0.2293	-0.18438	20.5113	-27.6531	8.31497	0.015625	-0.071289	0.050293	-64.347	215.856	451.6249	-0.54028	0.37231	-0.049072	3.056	44.081	4.7333	-0.2	-0.013965	-0.034766
0.038	-22.7964	-51.7683	559.6366	-0.31494	0.27148	-0.20947	-3.846	2.154	5.4229	0.012695	-0.068848	0.060547	-94.705	249.54	408.861	-0.50342	0.35254	-0.042969	0.5228	44.356	-11.8612	-0.22617	0.014551	-0.029101
0.04	-21.239	-66.976	603.335	-0.38398	0.32627	-0.23291	38.584	-35.1504	4.3133	0.0039063	-0.06543	0.070801	-85.602	189.68	380.47	-0.45996	0.32031	-0.030273	-1.8005	10.5851	34.24867	-0.24609	0.046387	-0.022949
0.042	3.65325	-49.349	648.417	-0.46485	0.38399	-0.26221	27.9095	10.4987	-11.487	0.00097656	-0.068359	0.083496	-75.809	215.713	371.543	-0.44287	0.30615	-0.025391	15.48444	-9.0336	47.601	-0.25879	0.069629	-0.010547
0.044	9.9362	-20.0796	679.482	-0.56054	0.44219	-0.29541	15.2921	10.1484	-10.9318	0.0024414	-0.064941	0.088867	-39.4989	169.495	346.853	-0.40967	0.2749	-0.01123	26.7114	-10.6437	40.616	-0.25693	0.093066	0.00048828
0.046	11.198	-11.284	678.3202	-0.67324	0.50781	-0.33213	51.721	-9.3558	6.4271	-0.0019531	-0.06543	0.10205	-51.706	182.689	317.6242	-0.39014	0.25439	-0.0021973	8.0332	-1.03873	-0.7378	-0.24678	0.11064	0.010645
0.048	-5.617	-26.03005	694.4	-0.79102	0.57959	-0.354	17.71647	29.3333	-1.75241	0.0075684	-0.071533	0.10938	-8.2964	143.181	303.39985197	-0.37354	0.23389	0.0063477	-2.749	19.496	-10.6098	-0.22608	0.11426	0.018359
0.05	-0.464	-50.793	706.62	-0.91572	0.65888	-0.37725	22.4988	-11.5826	13.8507	0.01123	-0.074707	0.11719	-19.133	153.79765	272.413	-0.34766	0.20996	0.01709	-14.1336	10.7128	12.3365	-0.19678	0.11865	0.033691
0.052	12.878	-50.8941	723.658	-1.0338	0.7375	-0.38711	34.45066	-1.4511	16.4394	0.019043	-0.074707	0.11816	41.6	151.485	238.8057	-0.33594	0.19531	0.023438	-10.0898	9.59	23.6482	-0.16592	0.1084	0.038574
0.054	23.724	-39.988	735.232	-1.1443	0.82227	-0.38399	0.783999999999999	26.0697	-10.972	0.03125	-0.080566	0.11719	19.8859	136.94645	224.585	-0.31494	0.16846	0.027832	3.5386	-12.7363	17.9238	-0.12842	0.09502	0.04209
0.056	26.361	-13.078	736.232	-1.2405	0.90342	-0.37822	34.491	-5.84725	-1.3873	0.039551	-0.088379	0.11523	42.657	135.691	220.865	-0.28955	0.15137	0.039551	10.5786	-20.4623	6.9219	-0.095215	0.074707	0.051465
0.058	20.135	-21.261	729.1692	-1.314	0.98291	-0.3667	33.1439	19.4499	-11.0583	0.046386	-0.092529	0.11158	33.4522	88.57	221.351	-0.28271	0.14502	0.04541	-5.962	-32.413	22.4317	-0.053614	0.049609	0.056446
0.06	18.873	-43.574	717.123	-1.3815	1.0435	-0.35264	-2.2218	31.3615	-26.719	0.051758	-0.098145	0.104	44.738	99.056	170.439	-0.26318	0.13281	0.052246	-38.0315	-21.5557	0.238404	-0.02002	0.021484	0.068848
0.062	6.585	-84.633	741.704	-1.412	1.0958	-0.34092	2.643	-1.3596	2.509	0.055664	-0.098145	0.095215	47.73007	73.469	133.411	-0.24438	0.12574	0.058594	-39.8227	-25.6714	0.831	0.02207	-0.012012	0.077734
0.064	47.048	-102.9571	782.542	-1.4152	1.1333	-0.32412	2.338	38.713	0.2398	0.059082	-0.10059	0.092773	19.5592	118.67758	102.769	-0.22461	0.12061	0.06543	-0.971	-16.3726	-18.493	0.06084	-0.055273	0.090234
0.066	40.791	-110.1081	830.9151	-1.3829	1.1429	-0.32549	-12.6961	1.15532	7.195097	0.054688	-0.097656	0.083496	44.37178	78.828	96.0687	-0.19922	0.11719	0.070801	0.393800000000001	-1.1857	-32.9353	0.088184	-0.091211	0.1043
0.068	8.398	-123.5187	883.605	-1.3384	1.1294	-0.3335	1.52	-4.91649	12.4998	0.049316	-0.09375	0.079101	16.9693	88.246	86.699	-0.18945	0.12109	0.067871	17.0013	-13.4995	-24.3055	0.098341	-0.11914	0.10703
0.07	-20.471	-151.305	895.411	-1.2637	1.102	-0.35527	-14.663172	19.2313	7.714	0.037598	-0.087402	0.077637	39.688	28.139	35.602	-0.16357	0.11426	0.074219	-6.78264	9.9947	-19.2322	0.10352	-0.13574	0.10547
0.072	-15.299	-186.69	920.847	-1.1625	1.0555	-0.38516	-20.4269	-28.704	3.1061	0.020996	-0.07666	0.077637	-6.113	38.12	20.684	-0.1333	0.094972	0.081055	-10.3711	14.4993	6.86784	0.1043	-0.14941	0.10459
0.074	-0.478999999999999	-171.579	954.8987	-1.048	0.99023	-0.42305	-24.0736	10.2404	3.4965	0.013184	-0.067871	0.077637	11.315	8.705	11.625	-0.099121	0.078613	0.09082	31.8816	32.3384	7.7828	0.11621	-0.16054	0.10449
0.076	-4.13500000000001	-164.244	982.876	-0.92783	0.90166	-0.45508	-32.527	10.6621	-0.4271	-0.0083008	-0.056641	0.084961	-25.282	11.29465	11.65	-0.050293	0.052246	0.10547	40.0995	46.6504	-11.165	0.13145	-0.17774	0.10293
0.078	-5.25	-140.3588	1019.8152	-0.82373	0.81104	-0.48096	-14.427	-17.74257	2.864	-0.028809	-0.040527	0.088379	-4.439	32.308	-15.5781	-0.032715	0.041016	0.10693	12.668	34.7884	-20.3263	0.1503	-0.19004	0.1041
0.08	-4.475	-134.5705	1042.3781	-0.74336	0.72012	-0.50449	-13.881	27.53	4.3733	-0.040039	-0.032227	0.095215	-25.6168	9.3804	-10.2723	0.0014648	0.0063477	0.097168	13.2456	37.715	-14.4356	0.16406	-0.20068	0.098633
0.082	0.466999999999999	-116.246	1052.5485	-0.68848	0.64316	-0.51738	-5.9686	7.2751	-4.9445	-0.052246	-0.019043	0.099121	-45.769	9.1423	-8.364	0.021972	-0.0095216	0.099853	21.4321	24.124	4.0876	0.175	-0.21221	0.090136
0.084	23.351	-110.627	1084.558	-0.66308	0.58496	-0.52324	-4.2491	17.7837	4.9266	-0.055664	-0.01123	0.10376	-53.6244	-25.9222	8.466	0.041504	-0.029297	0.095703	21.2118	33.112	12.0995	0.18369	-0.22334	0.081641
0.086	32.709	-110.138	1120.4141	-0.67129	0.54922	-0.5334	-5.2668	36.7905	-0.316400000000001	-0.061523	-0.00097656	0.10645	-66.346	14.4992	2.235	0.066895	-0.055176	0.098633	7.93198	17.4987	19.7986	0.18721	-0.22841	0.067578
0.088	44.925	-93.226	1130.2533	-0.71143	0.54736	-0.54932	6.78996	-15.7903	2.796	-0.057617	0.016113	0.10645	-42.728	-7.665	-19.0943	0.075195	-0.070313	0.099121	31.3761	13.018	8.1294	0.18818	-0.23935	0.053808
0.09	21.567	-79.614	1148.1647	-0.79697	0.5876	-0.56201	-0.297000000000001	19.1529	3.2617	-0.05127	0.018555	0.10156	-58.1329	38.33	-15.3241	0.085938	-0.10156	0.1001	15.3568	7.2719	4.307	0.18604	-0.24561	0.036621
0.092	17.462	-79.004	1156.5334	-0.90888	0.64931	-0.59629	2.66794	27.104	-6.9443	-0.041992	0.030762	0.097656	-37.418	-11.0205	0.802899999999999	0.092773	-0.12256	0.10058	-12.701	19.2563	16.1541	0.18135	-0.24131	0.026563
0.094	18.635	-74.146	1194.5616	-1.0245	0.74228	-0.61973	27.5128	-8.755	6.6708	-0.032227	0.03418	0.096924	-66.064	18.2847	0.624000000000001	0.094727	-0.14111	0.1001	9.1406	17.4722	38.494	0.17217	-0.24014	0.016211
0.096	30.826	-65.9573	1226.298	-1.1329	0.84092	-0.6374	19.6443	43.433	-0.431500000000001	-0.022461	0.041504	0.092773	-10.555	-0.523000000000003	-17.8411	0.092285	-0.16895	0.104	38.4207	21.5055	42.827	0.1667	-0.23467	0.0083984
0.098	25.945	-65.57955	1238.181	-1.229	0.94189	-0.65674	7.8983	4.8904	8.3972	-0.0043945	0.049316	0.086426	-23.6717	20.5908	7.95901	0.095703	-0.16992	0.10352	28.046	3.0118	26.757	0.15488	-0.23535	-0.0019531
0.1	15.233	-78.8846	1240.474	-1.3037	1.024	-0.667	47.3562	-13.0169	13.5394	0.0078125	0.046875	0.080078	1.839	38.316	-6.947	0.12012	-0.17529	0.11523	0.347	-28.2333	11.1603	0.13916	-0.22949	-0.010254
0.102	49.859	-87.5074	1255.213	-1.3589	1.0981	-0.67754	21.6111	14.0405	4.2205	0.027832	0.04541	0.072754	-10.086	47.484	15.3164	0.1543	-0.18409	0.1294	-8.167	-7.2144	-0.256	0.11592	-0.21582	-0.020606
0.104	58.253	-81.8618	1289.697	-1.3952	1.1454	-0.68574	47.321	-43.878	5.8912	0.044434	0.041748	0.065429	42.0806	64.105	-17.0331	0.19287	-0.19434	0.13086	-23.9919	9.2456	37.934	0.098826	-0.20195	-0.033594
0.106	82.4895	-89.486	1300.063	-1.442	1.19	-0.69863	36.4591	5.70991	5.729	0.057129	0.036133	0.059082	22.424	18.9804	-5.458	0.24805	-0.21484	0.14404	6.4193	21.1882	18.8016	0.074609	-0.18086	-0.041406
0.108	85.7367	-104.5776	1305.3974	-1.4897	1.231	-0.71045	3.076	19.2391	-7.9092	0.080566	0.027344	0.050293	34.0729	50.99	8.5646	0.27148	-0.22363	0.1416	-2.4533	4.1403	13.8747	0.054687	-0.15605	-0.055468
0.11	85.6603	-102.6424	1319.639	-1.5402	1.2746	-0.71953	28.77618	-15.0022	7.0889	0.08252	0.021484	0.047852	35.5722	-1.3667	32.3185	0.30322	-0.23291	0.12256	-20.3301	-17.9831	11.7538	0.035156	-0.13379	-0.063477
0.112	43.6384	-84.19252	1317.61305	-1.5941	1.3242	-0.73593	22.6172	31.2171	6.6962	0.1001	0.014648	0.029297	32.1094	55.034	27.322	0.31348	-0.23658	0.10205	-30.1807	-18.1757	8.7648	0.011133	-0.1083	-0.07832
0.114	19.493	-61.9433	1316.0708	-1.6414	1.366	-0.74531	-14.2881	-7.906	0.8296	0.10962	0.0063477	0.018311	70.1164	18.0545	27.3797	0.32422	-0.23828	0.08252	-24.8793	-25.5325	6.30837	-0.012695	-0.083984	-0.091113
0.116	36.223	-46.4534	1309.3249	-1.6863	1.4015	-0.76524	27.445	-7.6929	14.8758	0.11865	0.0024414	0.0058594	40.7527	48.0431	4.7969	0.34375	-0.24121	0.058105	-4.413	2.46317	-8.2557	-0.037305	-0.060937	-0.10556
0.118	35.509	-35.2018	1312.65779	-1.7241	1.4341	-0.78662	-3.8257	30.6202	-3.204	0.13086	-0.012695	-0.0058594	69.7644	3.9952	15.20333	0.35938	-0.23828	0.044922	18.227	-12.552	-21.0731	-0.056055	-0.040039	-0.12139
0.12	18.169	-35.1332	1323.3059	-1.7609	1.4641	-0.80117	-17.0264	-0.528	6.4851	0.13135	-0.020996	-0.013672	28.2916	15.8674	40.362	0.39404	-0.2417	0.036621	19.80806	-17.1707	-44.1536	-0.077637	-0.025391	-0.12988
0.122	-15.546	-39.767	1306.82572	-1.7933	1.4889	-0.82188	-0.994	32.591	-0.9261	0.13672	-0.03125	-0.030762	60.5478	-12.629	19.0169	0.41431	-0.24609	0.017822	-16.14213	-24.975	-27.7577	-0.093946	-0.0085936	-0.14961
0.124	1.944	-31.4283	1290.5225	-1.8172	1.5057	-0.84101	-24.478879	13.1137	-12.3464	0.13916	-0.038574	-0.044677	20.5409	-16.23582	24.81679	0.43164	-0.24609	0.010254	-4.6329	4.497	-1.815	-0.10049	0.009668	-0.16035
0.126	29.758	-6.847	1303.8757	-1.8348	1.5145	-0.8664	-10.056	-23.32	-6.3266	0.14404	-0.04834	-0.057617	31.3783	3.0428	15.68217	0.44141	-0.24756	-0.00048828	21.1612	16.572	19.88722	-0.11221	0.01748	-0.17989
0.128	27.768	15.191	1311.203	-1.8491	1.522	-0.87842	-24.141	16.91476	-4.807	0.13867	-0.056641	-0.077637	-14.727	-18.8574	28.8437	0.44678	-0.23926	-0.0019531	27.68055	27.0777	24.9333	-0.13867	0.027344	-0.1959
0.13	38.544	0.442	1304.301	-1.8538	1.5149	-0.88604	-29.399	-13.3062	2.969	0.14209	-0.058594	-0.086426	10.999	43.566	10.1389	0.44434	-0.23779	-0.010742	10.2375	42.3512	-11.6711	-0.17139	0.046387	-0.21484
0.132	42.743	-17.993	1306.4766	-1.8495	1.5048	-0.88975	-0.596	-8.7333	9.0985	0.13916	-0.061523	-0.10791	-5.001	0.557399999999999	12.056	0.44238	-0.22338	-0.021729	15.739	21.107	-10.7715	-0.20547	0.056152	-0.23691
0.134	47.766	-15.252	1312.87	-1.8374	1.4763	-0.8917	-26.3271	29.4913	-1.375	0.1416	-0.061767	-0.12305	-52.507	42.545	-2.828	0.43213	-0.21143	-0.028809	1.988	30.6599	-12.7306	-0.23574	0.073828	-0.24873
0.136	25.748	-20.9642	1332.6332	-1.8164	1.4484	-0.88555	-12.1181	-11.4179	-8.5979	0.14063	-0.063477	-0.13232	-46.375	-21.1125	29.038	0.41699	-0.18799	-0.032715	2.471	6.03204	-6.454	-0.24902	0.091016	-0.26123
0.138	20.668	-31.8568	1335.602	-1.7891	1.4121	-0.87695	4.851	16.6256	-5.6608	0.1333	-0.067871	-0.16699	-62.514	28.71	16.5824	0.40332	-0.17432	-0.03125	43.2839	13.6365	-3.7049	-0.25254	0.097169	-0.271
0.14	31.373	-31.859	1318.919	-1.7651	1.3794	-0.86865	-6.46634	3.476	24.99613	0.12744	-0.071289	-0.18359	-32.36	-25.176	1.2362	0.37549	-0.14404	-0.03125	16.7097	24.805	-13.3012	-0.24609	0.099609	-0.27881
0.142	31.122	-18.7183	1299.103	-1.7359	1.35	-0.85683	-1.177	-53.736	67.8213	0.10352	-0.075195	-0.21826	-60.9166	17.5055	-11.7346	0.3479	-0.12622	-0.026856	6.1169	34.603	-0.286000000000001	-0.23711	0.10489	-0.2836
0.144	29.893	-16.98818	1287.932	-1.7027	1.3222	-0.85175	21.4481	-19.246	82.8682	0.077149	-0.06543	-0.24365	-25.005	-17.4592	-15.2024	0.32471	-0.10547	-0.022461	22.93774	44.908	41.106	-0.22119	0.10322	-0.29287
0.146	38.737	-6.0934	1251.00157	-1.6725	1.2865	-0.84863	-4.8433	-52.6647	86.9935	0.04248	-0.049316	-0.25586	-78.173	-2.3503	1.2963	0.27539	-0.079102	-0.02002	2.953	12.1699	85.297	-0.20361	0.099316	-0.30928
0.148	57.757	11.2889	1253.2201	-1.6367	1.2568	-0.84961	39.3764	-25.9466	136.5693	-0.030273	-0.021973	-0.27686	-17.205	8.742	1.2991	0.25439	-0.068848	-0.016113	12.593	-3.402	113.4626	-0.18955	0.080273	-0.325
0.15	65.342	39.834	1247.349	-1.6077	1.229	-0.84307	51.1324	23.7812	155.4519	-0.080566	-0.012207	-0.27881	-20.569	-4.0957	3.114	0.21094	-0.041504	-0.0087891	36.9453	-25.773	147.045	-0.18115	0.058594	-0.3501
0.152	74.8607	45.003	1247.0752	-1.584	1.1946	-0.84492	44.282	-3.838	196.807	-0.18506	0.019531	-0.28223	-10.0611	19.7441	0.114999999999998	0.18506	-0.023437	-0.010254	25.2208	-9.2708	166.996	-0.18525	0.053418	-0.37168
0.154	70.744	50.954	1242.882	-1.5609	1.1746	-0.84297	64.4371	45.398	244.92	-0.27002	0.036621	-0.28173	-11.244	-19.3817	4.8016	0.15869	-0.0087891	-0.0043945	1.953	-24.382	224.025	-0.2041	0.04961	-0.38828
0.156	90.0844	53.264	1220.47	-1.5485	1.1608	-0.83545	51.8071	42.8033	291.739	-0.34717	0.052246	-0.26904	-5.588	30.935	-13.834	0.13086	0.019043	-0.0039063	32.927	-18.6942	272.4348	-0.24902	0.057813	-0.40664
0.158	82.1851	58.816	1201.9802	-1.5347	1.145	-0.82568	59.7337	28.348	383.8258	-0.45898	0.06543	-0.24316	-0.701000000000001	-11.8448	-12.4631	0.11768	0.036133	-0.0073242	9.611	-20.9001	308.762	-0.32412	0.081445	-0.40547
0.16	66.45	54.711	1210.903	-1.5355	1.1395	-0.82344	35.556	87.7773	431.842	-0.53076	0.075195	-0.24316	11.56915	44.591	-8.81	0.10791	0.064453	-0.0083008	14.042	-13.0083	384.1347	-0.41943	0.1167	-0.39355
0.162	48.93	52.8165	1185.8	-1.5375	1.1383	-0.81582	32.613	83.3286	460.6605	-0.68896	0.13574	-0.229	64.56712	-6.062	12.31379	0.10205	0.09082	-0.0095213	23.1563	51.4589	496.311	-0.53135	0.15811	-0.36494
0.164	54.8383	46.36141	1151.383	-1.536	1.1328	-0.81582	54.6603	83.13374	508.704	-0.81397	0.17676	-0.20898	9.463	37.938	1.3743	0.090332	0.10498	-0.016113	-25.5221	53.026	667.995	-0.65323	0.19229	-0.3292
0.166	41.403	54.2216	1102.8863	-1.5341	1.1304	-0.80908	21.6525	99.138	555.0246	-0.95117	0.22998	-0.17725	79.7828	27.4297	-6.2043	0.061523	0.13037	-0.016113	-12.4637	51.996	768.312	-0.7876	0.22822	-0.28975
0.168	22.577	32.834	1103.8457	-1.5308	1.1313	-0.8042	26.3799	35.2132	611.468	-1.1416	0.30811	-0.12012	49.74258	63.488	0.0719999999999992	0.048828	0.14355	-0.022949	29.462	3.542	877.871	-0.95174	0.24873	-0.23477
0.17	40.559	35.7661	1112.0263	-1.5192	1.1311	-0.79717	31.928	22.1264	655.4464	-1.2378	0.35059	-0.085449	56.101	47.2902	-8.375	0.0087891	0.17627	-0.036621	35.96	-60.8064	923.867	-1.2041	0.20605	-0.12988
0.172	29.139	37.9883	1100.444	-1.5061	1.1296	-0.79248	38.6904	-1.835	688.3958	-1.4429	0.44385	-0.02832	35.3554	20.876	1.4126	-0.0085449	0.20703	-0.043701	4.244	-118.2487	1018.993	-1.612	0.16944	-0.0096679
0.174	24.35	56.707	1081.1993	-1.4909	1.1277	-0.78584	74.7146	-72.1913	729.3828	-1.6309	0.51563	0.0041502	58.866	44.914	-9.705	-0.023438	0.229	-0.047852	58.17	-156.881	1113.8987	-2.0231	0.36602	-0.0333
0.176	29.961	51.9177	1063.4351	-1.4684	1.1183	-0.77148	73.3932	-75.142	771.1562	-1.8081	0.60596	0.024902	15.042	-0.75975	12.956	-0.032227	0.25293	-0.04541	75.446	-145.762	1126.6675	-2.3465	0.61094	-0.062598
0.178	44.634	53.28	1063.994	-1.4414	1.1074	-0.76074	36.463	-113.824	781.2561	-2.0449	0.71289	0.015625	28.2437	43.19	17.7622	-0.029785	0.26367	-0.04248	77.1263	-181.811	1091.5	-2.6534	0.77588	-0.046777
0.18	35.233	86.752	1050.678	-1.4057	1.095	-0.74131	74.1962	-112.6004	789.25	-2.1719	0.77344	-0.022949	26.684	-9.2464	25.9241	-0.03125	0.28174	-0.04248	72.201	-205.577	1058.195	-2.9624	0.93213	-0.046875
0.182	11.655	108.085	1013.5121	-1.3749	1.0759	-0.72256	10.6496	-80.0621	792.1946	-2.3413	0.96338	-0.14355	-39.9148	53.635	14.0997	-0.033447	0.2876	-0.039063	23.867	-260.963	1075.174	-3.1543	1.0918	-0.067578
0.184	7.996	100.359	968.9002	-1.337	1.0528	-0.7081	-13.329	-117.193	812.7067	-2.3249	1.0652	-0.20166	11.107	10.8705	15.549	-0.036621	0.29395	-0.036621	-21.811	-224.982	1086.898	-3.1465	1.223	-0.098632
0.186	-9.061	86.6309	956.56609	-1.3064	1.0268	-0.6873	-11.2617	-103.696	844.581	-2.2031	1.1123	-0.22314	-15.1048	48.159	29.69392	-0.041016	0.29785	-0.026367	-17.964	-221.664	1133.219	-2.9203	1.2883	-0.14511
0.188	-15.44	98.1704	936.7369	-1.2754	1.0039	-0.66992	-53.397	-107.031	859.099	-1.9409	1.0806	-0.23486	-14.763	-7.8883	16.04377	-0.039063	0.29932	-0.025391	-14.4518	-222.867	1159.895	-2.5665	1.2964	-0.21895
0.19	7.059	97.77276	935.143	-1.2449	0.98437	-0.65469	-37.959	-146.488	913.805	-1.8081	1.0415	-0.25586	-53.796	13.4546	27.826	-0.041016	0.29932	-0.01709	-60.838	-256.593	1185.172	-2.1968	1.2642	-0.30859
0.192	15.895	95.5267	903.174	-1.2146	0.97022	-0.63584	-53.068	-131.8021	961.756	-1.5967	0.93359	-0.2998	-26.084	-7.7861	20.3587	-0.039551	0.29395	-0.012207	-64.243	-272.516	1212.577	-1.9152	1.2137	-0.38535
0.194	4.357	86.0772	882.4779	-1.1868	0.94873	-0.61514	-41.005	-160.0031	988.8488	-1.499	0.85351	-0.33936	-77.552	-3.0889	31.8402	-0.040527	0.2915	-0.010742	-51.981	-199.393	1209.8385	-1.7411	1.14	-0.44014
0.196	-7.21	100.2737	853.5383	-1.164	0.93096	-0.60029	-5.567	-200.0644	1019	-1.4526	0.77588	-0.36963	-32.4731	16.6679	8.7257	-0.03125	0.27734	-0.0097656	-20.038	-119.9	1255.4662	-1.6649	1.0317	-0.47491
0.198	15.137	89.19479	838.40254	-1.1406	0.91797	-0.58398	9.181	-160.544	1024.444	-1.4502	0.66992	-0.39893	-55.20238	-7.2595	15.493	-0.03125	0.27686	-0.0083008	27.8356	-26.12	1314.13	-1.6526	0.89199	-0.49365
0.2	40.506	97.9437	838.1259	-1.1153	0.90342	-0.56631	-1.435	-173.495	1067.589	-1.4663	0.61963	-0.40283	-58.192	39.061	6.9966	-0.020996	0.26416	-0.0053711	-24.3739	-59.21	1333.637	-1.6675	0.74268	-0.47705
0.202	38.88511	104.6636	816.7041	-1.0941	0.8876	-0.55088	-2.895	-163.109	1115.748	-1.5352	0.52344	-0.38574	-13.512	-20.364	28.2519	-0.010254	0.25439	-0.018066	-9.62	-127.169	1307.5478	-1.7058	0.5999	-0.44151
0.204	21.627	103.1963	788.6066	-1.0659	0.87979	-0.53604	10.52726	-114.712	1147.5277	-1.6143	0.47265	-0.35889	-9.3054	33.786	23.2882	-0.0039063	0.24658	-0.0058594	-4.406	-238.255	1335.14	-1.7672	0.47344	-0.40351
0.206	27.285	107.689	757.8275	-1.0386	0.86846	-0.52393	3.2318	-182.843	1210.54399	-1.7319	0.44971	-0.32227	-31.775	-38.405	15.6491	0.0053711	0.22754	-0.019043	-28.688	-276.716	1400.115	-1.8719	0.38242	-0.36289
0.208	20.184	106.515	748.1374	-1.0098	0.85547	-0.51025	26.799	-179.372	1265.231	-1.9116	0.46338	-0.27295	-29.8768	-7.0442	34.389	0.014892	0.20972	-0.039795	-73.66	-265.594	1454.226	-2.008	0.34844	-0.31856
0.21	30.397	108.963	734.0963	-0.9833	0.84619	-0.49775	-8.8068	-180.769	1298.438	-2.0117	0.48242	-0.24023	35.021	-74.449	84.463	0.013672	0.18604	-0.064941	-85.634	-285.07	1475.005	-2.166	0.36719	-0.28711
0.212	17.791	105.7046	719.064	-0.95	0.83359	-0.4833	-32.5509	-202.757	1362.188	-2.1987	0.5415	-0.18555	-9.4497	-24.509	142.591	-0.0019531	0.15332	-0.11133	-84.314	-281.228	1441.02	-2.3279	0.43281	-0.28086
0.214	9.498	94.742	694.878	-0.91524	0.82071	-0.47315	-23.1269	-131.9202	1376.562	-2.3155	0.59912	-0.15405	42.5737	-29.111	196.872	-0.018066	0.14063	-0.13867	-79.8143	-315.638	1461.5801	-2.4722	0.52852	-0.2916
0.216	29.2111	98.653	661.1813	-0.88408	0.80186	-0.46035	-41.3546	-152.338	1359.5241	-2.4121	0.65527	-0.12988	-3.0912	-23.5745	288.232	-0.071289	0.13867	-0.18896	-17.474	-246.959	1492.463	-2.5821	0.64023	-0.31933
0.218	17.418	102.6132	613.516	-0.84863	0.78223	-0.44873	20.859	-147.701	1389.3665	-2.5068	0.73145	-0.11426	-11.70575	-72.904	360.251	-0.1316	0.15894	-0.2146	18.943	-196.51	1554.813	-2.6457	0.76055	-0.34639
0.22	1.071	109.1427	593.35	-0.81153	0.76269	-0.43535	48.23084	-95.99	1393.7253	-2.5818	0.79614	-0.13819	-49.882	-117.9823	493.153	-0.20361	0.18359	-0.2334	33.5385	-114.2514	1544.5347	-2.6753	0.88525	-0.37451
0.222	-3.71	104.803	572.562	-0.7788	0.74229	-0.42158	59.07651	-148.435	1439.55076	-2.6484	0.87891	-0.17383	-33.413	-103.284	565.993	-0.3252	0.22461	-0.24707	69.638	-83.221	1501.312	-2.6762	0.99181	-0.42383
0.224	16.535	97.399	558.0671	-0.74678	0.72978	-0.41143	74.756	-105.721	1468.92	-2.6987	0.979	-0.22656	-84.052	-141.0007	639.867	-0.39551	0.24902	-0.24609	116.996	-93.424	1472.798	-2.6492	1.0831	-0.47295
0.226	6.819	103.454	520.8327	-0.72256	0.70518	-0.39912	58.242	-70.24	1443.3833	-2.7129	1.0156	-0.25439	-89.491	-75.825	683.493	-0.54443	0.29004	-0.23779	158.435	-82.725	1464.327	-2.5862	1.146	-0.52256
0.228	-19.4144	112.529	505.1338	-0.70117	0.68994	-0.38672	59.877	-91.239	1471.759	-2.7144	1.0903	-0.31299	-89.6442	-85.7104	702.331	-0.66919	0.31274	-0.22095	146.4492	-85.623	1496.723	-2.5026	1.1771	-0.5709
0.23	-4.799	116.93	502.8811	-0.66982	0.6792	-0.37491	81.472	-27.998	1467.3564	-2.6939	1.1181	-0.35791	-101.332	-20.193	741.064	-0.82471	0.32666	-0.18945	102.663	-36.603	1462.383	-2.4102	1.1855	-0.61719
0.232	-1.995	116.348	502.3282	-0.63897	0.66377	-0.36123	60.2832	-51.8816	1449.091	-2.6699	1.1289	-0.39258	-13.5816	-82.573	773.08	-1.1323	0.30908	-0.10742	47.1718	-19.726	1462.86	-2.3261	1.1763	-0.64268
0.234	-20.98	115.12	457.442	-0.61201	0.64775	-0.34755	50.72	-59.128	1476.6561	-2.6284	1.1294	-0.43018	-31.3232	-40.593	797.1974	-1.3257	0.30615	-0.069824	55.1553	-5.2932	1456.632	-2.2659	1.1583	-0.654
0.236	-47.4712	107.3525	423.847	-0.58818	0.63506	-0.33633	37.174	-21.7894	1481.2348	-2.6133	1.123	-0.44922	-16.421	-92.16	857.462	-1.7261	0.37158	-0.025879	107.045	-14.0255	1441.708	-2.2315	1.1333	-0.65948
0.238	-27.2434	99.4089	406.3935	-0.56836	0.62061	-0.32227	12.717	-86.791	1513.6761	-2.5952	1.106	-0.47803	-41.577	-39.8984	920.181	-1.9966	0.45996	0.020019	138.816	-36.987	1458.67	-2.2183	1.0979	-0.65117
0.24	-15.562	91.5068	414.494	-0.54238	0.6043	-0.31172	42.379	-75.749	1556.515	-2.5779	1.0872	-0.48877	31.738	-47.934	936.993	-2.2349	0.56689	0.092285	140.799	-57.115	1461.041	-2.2168	1.0566	-0.64063
0.242	-22.458	97.393	386.0128	-0.50752	0.58398	-0.29736	54.3362	-63.77385	1505.09962	-2.5542	1.061	-0.49072	-27.59	-79.054	932.277	-2.5054	0.73096	0.19922	64.6616	-84.28	1484.414	-2.2097	1.0102	-0.62881
0.244	-26.3218	90.753	357.1038	-0.46924	0.55782	-0.28213	55.995	-111.75	1515.7588	-2.5195	1.0156	-0.48242	-17.403	-104.766	915.096	-2.605	0.80615	0.23926	71.027	-51.1823	1496.619	-2.1903	0.96406	-0.61406
0.246	-5.45	87.903	339.9293	-0.42842	0.52451	-0.2669	70.6236	-38.655	1519.744	-2.5054	0.98682	-0.47607	-9.105	-168.386	987.2495	-2.6748	0.95898	0.28027	79.382	-35.455	1507.047	-2.1637	0.92109	-0.59648
0.248	-10.16	84.573	315.4666	-0.38818	0.48877	-0.26514	59.6596	-40.5236	1484.488	-2.4761	0.92627	-0.45264	4.358	-134.34	1030.60251	-2.6885	1.0127	0.23828	117.964	28.089	1497.621	-2.1242	0.87754	-0.57851
0.25	-14.347	89.888	315.64455	-0.3458	0.46142	-0.25342	59.607739	-46.1874	1513.235	-2.4589	0.88818	-0.43261	24.238	-175.155	1098.382	-2.6875	1.0684	0.16064	103.326	7.569	1437.68173	-2.0796	0.84424	-0.55664
0.252	-0.174999999999997	93.907	304.4465	-0.3044	0.43662	-0.23935	57.7802	15.782	1510.375	-2.4468	0.85986	-0.41846	56.1189	-136.852	1125.958	-2.5991	1.1694	0.049805	15.437	39.591	1409.965	-2.0267	0.81748	-0.53681
0.254	16.045	100.608	288.3163	-0.26064	0.41201	-0.22529	22.507	-49.579	1516.638	-2.4453	0.82813	-0.40039	103.629	-256.393	1147.998	-2.5073	1.2134	0.0063477	-21.146	60.995	1379.491	-1.9764	0.79463	-0.51474
0.256	6.4551	97.509	282.0418	-0.23398	0.38262	-0.22002	18.902	-23.7632	1548.762	-2.4434	0.82031	-0.39111	77.43	-259.35	1184.807	-2.2632	1.2329	-0.039063	-41.58	86.555	1405.581	-1.9296	0.77744	-0.49092
0.258	-19.2471	81.8746	253.3199	-0.20459	0.35986	-0.21631	7.084	45.892	1475.96311	-2.4434	0.80859	-0.37012	126.9342	-352.246	1224.1895	-2.0759	1.176	-0.071045	-13.031	123.389	1365.43313	-1.8827	0.76865	-0.46533
0.26	-2.186	85.585	241.114	-0.17803	0.33984	-0.20527	6.612	8.582	1473.8459	-2.4363	0.8064	-0.36353	58.841	-294.923	1259.483	-1.9238	1.0752	-0.10156	-12.726	71.091	1321.0954	-1.834	0.75977	-0.44531
0.262	18.176	94.854	233.419	-0.15859	0.31846	-0.19424	30.104	74.334	1464.7292	-2.4219	0.80664	-0.36133	116.971	-302.046	1333.9539	-1.8125	0.92188	-0.11914	-3.315	69.506	1247.902	-1.7937	0.7583	-0.42187
0.264	18.6271	98.78	208.2938	-0.14023	0.30322	-0.18643	7.559	44.5822	1422.049	-2.3965	0.81836	-0.35742	80.6326	-277.758	1386.867	-1.7959	0.84668	-0.12012	-42.953	77.539	1204.324	-1.7464	0.75791	-0.39854
0.266	6.824	85.042	196.2065	-0.12783	0.28516	-0.17705	44.406	-0.0748999999999995	1443.8891	-2.3838	0.81934	-0.35986	112.55	-260.7496	1386.344	-1.8262	0.71484	-0.11621	-43.999	130.4559	1198.072	-1.7046	0.75283	-0.37939
0.268	5.386	55.1034	192.96	-0.11572	0.27002	-0.16064	50.9552	46.339	1417.229	-2.3418	0.83203	-0.35742	87.226	-272.086	1407.831	-1.9007	0.65112	-0.10498	-19.799	185.861	1202.353	-1.6628	0.75088	-0.35635
0.27	25.4708	54.4743	187.0878	-0.10772	0.25401	-0.15342	56.5804	4.9848	1397.142	-2.311	0.8418	-0.35596	116.716	-208.336	1431.314	-2.0093	0.60596	-0.098633	4.71	173.804	1193.354	-1.6211	0.74023	-0.3418
0.272	1.977	63.7496	165.257	-0.094922	0.24053	-0.14052	80.174	30.18	1419.6505	-2.2793	0.84668	-0.35254	69.25	-220.72	1477.0351	-2.2026	0.59619	-0.083984	24.01465	137.726	1149.178	-1.5759	0.73623	-0.3126
0.274	1.545	58.2788	153.13	-0.083985	0.22647	-0.13467	49.6573	73.894	1368.0863	-2.23	0.84717	-0.35303	92.598	-125.389	1465.466	-2.3105	0.60938	-0.083496	-3.901	96.326	1116.8983	-1.5343	0.72901	-0.29287
0.276	2.928	65.804	147.475	-0.072657	0.21572	-0.12275	62.0495	21.821	1362.56491	-2.2046	0.84619	-0.35107	109.186	-143.4844	1455.07825	-2.5132	0.65869	-0.073242	34.979	139.606	1107.8488	-1.4894	0.71455	-0.271
0.278	-0.190000000000001	65.921	143.091	-0.061035	0.20117	-0.1123	73.9893	59.576	1358.262	-2.144	0.84619	-0.35059	43.7166	-75.846	1440.86	-2.655	0.71704	-0.065918	48.4188	176.8652	1089.678	-1.4391	0.70391	-0.25293
0.28	-19.899	66.147	130.894	-0.046094	0.19121	-0.10918	21.81	52.598	1305.8382	-2.0867	0.84692	-0.34521	30.174	-138.0826	1477.603	-2.7656	0.78711	-0.062012	56.07	214.0115	1039.284	-1.3828	0.68652	-0.23682
0.282	-20.4512	61.737	118.6603	-0.028711	0.17607	-0.10312	44.1854	34.072	1317.542	-2.0308	0.83643	-0.33936	-34.254	-116.4471	1511.921	-2.8608	0.89697	-0.069824	27.40668	153.691	986.9296	-1.3207	0.67325	-0.21738
0.284	16.113	64.28	124.508	-0.0083985	0.16513	-0.095703	60.178	107.829	1277.208	-1.9453	0.83105	-0.32813	-19.069	-140.915	1525.277	-2.8999	0.9458	-0.081543	28.107	123.483	914.433	-1.2565	0.65537	-0.19551
0.286	-8.521	65.808	115.0566	0.00078126	0.15733	-0.088672	-0.863	54.107	1224.834009	-1.8984	0.82617	-0.32813	-66.979	-112.2414	1559.396	-2.9766	1.0547	-0.12012	51.841	151.872	884.378	-1.1874	0.63701	-0.17715
0.288	-28.782	62.6662	98.64132	0.012695	0.14795	-0.083496	41.867	60.382	1216.16	-1.8159	0.81299	-0.31006	-22.135	-129.5095	1562.256	-3.0244	1.1397	-0.15088	73.683	190.3486	870.9769	-1.1226	0.61807	-0.15947
0.29	-31.4458	49.63674	88.4041	0.023633	0.13457	-0.080469	53.88131	98.984	1148.4971	-1.7504	0.80224	-0.30053	-54.2567	-148.045	1593.417	-3.0601	1.2153	-0.18213	58.694	270.567	797.173	-1.0581	0.59912	-0.146
0.292	-0.102999999999998	44.376	85.381	0.032813	0.12549	-0.073926	45.8965	56.99966	1127.3693	-1.6855	0.79004	-0.28564	-22.841	-116.714	1611.751	-3.0723	1.3027	-0.21436	44.887	270.188	737.146	-0.9879	0.5834	-0.13408
0.294	-9.2637	46.355	88.451	0.041797	0.11299	-0.068067	81.23	125.205	1106.6152	-1.6016	0.7793	-0.26563	-57.4153	-137.195	1596.88	-3.0762	1.3359	-0.23047	51.305	271.073	686.14	-0.91865	0.56592	-0.11953
0.296	-44.3432	43.627	61.5506	0.050488	0.10215	-0.062598	22.8121	121.753	1040.3901	-1.5586	0.76758	-0.25293	-78.442	-87.31	1578.685	-3.0542	1.3677	-0.24854	33.75706	254.259	679.2325	-0.84795	0.55225	-0.10625
0.298	-28.12779	45.333	39.8106	0.05957	0.093262	-0.053223	23.1241	102.899	1048.7402	-1.4824	0.75586	-0.23242	-63.429	-122.6746	1596.9	-3.0542	1.3774	-0.25683	50.772	257.731	685.411	-0.78487	0.53262	-0.096483
0.3	13.015	45.592	47.447	0.06543	0.080567	-0.04209	27.2088	159.286	1012.9155	-1.4243	0.74267	-0.21997	-56.139	-58.135	1604.676	-3.041	1.375	-0.26074	56.542	286.974	652.9611	-0.71875	0.50977	-0.07959
0.302	-1.005	50.199	43.4588	0.069433	0.068066	-0.043164	-16.4069	101.755	983.7239	-1.3672	0.7334	-0.19922	-22.407	-73.55453	1608.869	-3.0234	1.3516	-0.25	-11.189	269.174	612.238	-0.65576	0.48887	-0.068652
0.304	-8.41	33.5095	49.15763	0.076856	0.053223	-0.037305	5.191	117.83	980.308	-1.3008	0.71094	-0.18555	-49.913	-3.546	1578.3647	-3.0073	1.3403	-0.24365	-59.5555	256.309	539.661	-0.59678	0.46621	-0.055469
0.306	13.84	29.1138	48.8187	0.086036	0.038769	-0.03418	-10.0662	160.7297	910.7688	-1.2598	0.69727	-0.18262	-19.814	-8.051	1560.892	-2.9839	1.3149	-0.21924	-117.104	209.2273	489.872	-0.54092	0.44356	-0.042578
0.308	8.432	26.8662	48.4778	0.10254	0.024902	-0.027832	-30.421	111.249	897.4398	-1.1855	0.68066	-0.15918	-51.5125	38.864	1548.0352	-2.9529	1.2854	-0.20727	-73.449	204.5903	460.755	-0.48183	0.42002	-0.027051
0.31	3.245	36.341	61.483	0.11338	0.013086	-0.029492	-22.24228	169.569	885.286	-1.1365	0.66089	-0.15551	9.838	39.7457	1520.28	-2.9219	1.2559	-0.19434	-52.552	178.9403	434.64928	-0.4292	0.39697	-0.013184
0.312	6.232	20.9396	39.4684	0.12559	0.0049805	-0.03252	-7.38563	149.952	819.299	-1.0859	0.6377	-0.14258	31.675	61.326	1527.421	-2.8574	1.2129	-0.17578	-93.081	182.45185	381.196	-0.37988	0.37178	-0.0048828
0.314	17.574	24.7443	40.666	0.13535	-0.0012695	-0.033301	-23.9068	112.82	811.6209	-1.0073	0.60889	-0.11816	65.101	58.945	1544.225	-2.8179	1.1919	-0.16553	-117.664	150.449	345.7195	-0.33916	0.34482	0.0050781
0.316	23.043	36.652	5.82	0.14795	-0.00625	-0.039941	12.6998	183.266	774.1216	-0.97217	0.59912	-0.10938	47.66065	40.1281	1558.949	-2.7437	1.1353	-0.14697	-118.549	153.264	325.388	-0.30244	0.3167	0.014062
0.318	17.579	18.7246	-1.7803	0.15332	-0.0087891	-0.043457	-16.02999	131.9915	733.6545	-0.91162	0.56299	-0.099121	56.333	33.534	1524.2833	-2.6894	1.0928	-0.1377	-96.414	144.0108	332.713	-0.27168	0.29424	0.019727
0.32	12.628	3.7059	15.0781	0.16201	-0.01416	-0.048633	0.0960000000000001	169.08	734.966	-0.86792	0.5354	-0.088379	36.198	26.7015	1498.5898	-2.6406	1.0508	-0.12451	-59.822	112.4861	320.841	-0.24902	0.27148	0.022949
0.322	7.433	5.9994	23.1366	0.16484	-0.012207	-0.057324	2.5573	208.799	677.51697	-0.82813	0.51563	-0.076172	43.631	51.291	1463.19	-2.5679	1.0034	-0.11084	-23.6032	146.206	262.171	-0.23115	0.25224	0.023535
0.324	25.0272	15.157814	16.5631	0.16719	-0.012597	-0.058496	-15.0019	135.342	638.748	-0.77051	0.47852	-0.055176	57.0122	31.251	1495.23	-2.5332	0.99023	-0.10645	-75.497	151.544	209.431	-0.23125	0.2377	0.033008
0.326	20.1139	16.42754	14.6231	0.16035	-0.012402	-0.060449	-1.07153	192.1542	610.2985	-0.74512	0.45313	-0.043945	41.8183	31.142759	1477.655	-2.4531	0.95508	-0.094238	-99.25	169.809	157.1992	-0.23398	0.22637	0.029492
0.328	6.906	16.1233	17.45407	0.14551	-0.0078125	-0.064453	-48.201	169.6888	570.0717	-0.69238	0.4126	-0.019043	45.9493	15.644	1460.656	-2.3894	0.93872	-0.087158	-84.033	136.764	162.982	-0.2414	0.22295	0.018164
0.33	11.953	19.462	26.8233	0.13584	-0.0058594	-0.066895	-27.6362	162.222	563.3559	-0.65747	0.37378	-0.0046387	39.597	30.66	1450.117	-2.3276	0.92236	-0.077637	-42.9595	107.258	129.556	-0.24463	0.22119	0.024902
0.332	-4.689	27.6079	6.209	0.11865	-0.0028321	-0.070508	4.6927	228.807	536.2567	-0.62793	0.34375	0.0048828	36.9766	57.178	1424.05	-2.2422	0.89648	-0.077637	7.0034	79.826	89.992	-0.2459	0.22285	0.037793
0.334	-11.961	22.0268	-3.2591	0.10146	-0.0028321	-0.070118	-14.4356	145.166	496.3696	-0.59473	0.30469	0.015137	-1.543	83.31	1379.00109	-2.1992	0.88477	-0.079102	30.3332	48.699	41.368	-0.25732	0.22246	0.054883
0.336	-10.2	18.9146	2.35238	0.093652	0.003125	-0.066406	3.65068	162.4877	464.7595	-0.57617	0.28613	0.019043	11.885	119.0933	1326.4434	-2.1089	0.84619	-0.07373	3.5631	54.783	20.808	-0.28428	0.2252	0.066992
0.338	12.707	0.522	13.4202	0.078125	0.0063477	-0.062012	15.9303	178.28	423.985	-0.53955	0.25098	0.032715	-13.143	120.3979	1291.3332	-2.0444	0.81836	-0.068848	-2.4827	45.032	25.5371	-0.31777	0.22793	0.076172
0.34	-12.688	0.1855	17.5006	0.071679	0.0045898	-0.063281	12.22	125.4736	399.655	-0.50879	0.2229	0.037109	1.212	153.651	1245.891	-1.978	0.78369	-0.066895	89.978	63.292	30.5	-0.34912	0.23633	0.08252
0.342	-23.453	5.46356	0.2342	0.064063	0.0049805	-0.064843	21.0221	179.031	377.30638	-0.46875	0.19385	0.04541	-33.885	133.284	1250.5814	-1.8979	0.74072	-0.063965	99.221	32.1295	23.231	-0.37422	0.24395	0.088575
0.344	-13.3668	16.3099	3.268	0.057422	0.0077148	-0.066015	4.1672	141.102	357.1585	-0.42627	0.1543	0.05127	-40.9801	166.041	1212.78	-1.8323	0.70142	-0.061523	102.103	19.317	9.811	-0.38799	0.25547	0.094726
0.346	3.519	15.4294	13.5536	0.057324	0.0087891	-0.062988	-8.4468	105.8552	342.1858	-0.40723	0.13574	0.058594	-74.521	160.506	1211.78177	-1.7729	0.6665	-0.059082	102.362	10.029	5.75704	-0.39541	0.26133	0.09707
0.348	-10.94	24.1198	16.8875	0.060059	0.0092773	-0.063477	-10.2135	153.164	306.9721	-0.36719	0.10449	0.055176	-64.4354	195.559	1153.183	-1.6875	0.61523	-0.055664	26.5108	44.192	8.09883	-0.39424	0.26943	0.099121
0.35	-17.783	10.8866	8.0433	0.05918	0.0084961	-0.061621	-37.4	90.595	299.045	-0.34033	0.083496	0.053223	-49.2189	202.1496	1127.5569	-1.6445	0.59473	-0.053711	27.87794	61.035	27.4422	-0.38721	0.26611	0.1001
0.352	-4.871	13.1346	-0.6039	0.064844	0.011816	-0.058398	-36.038	121.8203	277.9849	-0.30273	0.061523	0.054199	-49.6752	220.979	1042.486	-1.564	0.55225	-0.053711	80.066	29.076	38.8785	-0.37314	0.26192	0.10557
0.354	12.66	17.5911	10.52833	0.069141	0.014551	-0.058398	-26.0062	145.295	253.3002	-0.26221	0.030273	0.054688	-20.0936	209.763	1072.386	-1.5004	0.52002	-0.045655	42.674	4.4204	5.855	-0.35283	0.25439	0.10957
0.356	-11.022	21.2178	19.6292	0.071485	0.010156	-0.05791	-31.805	81.665	231.9461	-0.2417	0.017578	0.050781	-51.286	184.328	1024.1083	-1.4409	0.48535	-0.041992	0.946	-39.8	-18.5887	-0.33174	0.2458	0.11464
0.358	-13.04	15.337426	8.44316	0.076172	0.0043945	-0.061035	-15.6699	124.549	197.8251	-0.20752	0.0063477	0.055664	-25.7965	187.2177	1011.7414	-1.355	0.44824	-0.040527	1.8579	12.6126	-25.589	-0.31123	0.22891	0.11611
0.36	6.856	11.9605	12.7561	0.082422	0.0023437	-0.057129	-28.883	84.0732	165.0152	-0.17725	-0.0083008	0.053711	-27.672	169.233	946.0752	-1.3105	0.43359	-0.043457	-29.7557	39.1033	14.707	-0.29248	0.20557	0.11963
0.362	18.822	14.8313	6.0074	0.091211	-0.0076171	-0.054688	-21.4843	63.0493	169.9763	-0.15332	-0.013184	0.054199	14.986	202.919	913.705	-1.2241	0.39941	-0.041992	-26.6785	64.229	39.712	-0.26748	0.18086	0.12783
0.364	0.661999999999999	22.37	12.6698	0.10098	-0.013476	-0.051562	8.8074	118.137	143.9815	-0.11377	-0.034668	0.062012	22.245	202.44	871.0787	-1.154	0.37426	-0.043701	8.122	49.2095	14.704	-0.23955	0.15469	0.1378
0.366	5.89	18.2255	13.422	0.11192	-0.014746	-0.049414	-39.087	69.3115	111.548	-0.08374	-0.040039	0.062011	57.96786	274.755	838.295	-1.0874	0.34814	-0.040039	-50.074	-12.101	-17.1605	-0.2122	0.12773	0.14326
0.368	15.263	24.6129	11.45506	0.11719	-0.014648	-0.047363	-19.4023	98.282	105.5522	-0.05957	-0.043945	0.060547	45.33021	233.92	820.2039	-0.99707	0.31885	-0.041992	-72.614	-14.2406	-12.497	-0.18652	0.10146	0.14688
0.37	20.507	25.8956	-3.56677	0.1248	-0.0091795	-0.046387	-16.49658	86.46	73.83187	-0.034668	-0.047852	0.060547	67.783	277.254	763.208	-0.95264	0.30811	-0.040527	-39.8773	-7.7823	49.3184	-0.1543	0.069336	0.15576
0.372	13.305	15.6377	-2.9865	0.12891	-0.0033203	-0.045117	-30.213819	42.5504	80.12774	-0.020508	-0.046387	0.057129	72.458	204.70416	765.999	-0.86523	0.27393	-0.036621	-50.845	27.4291	51.779	-0.12031	0.043262	0.15186
0.374	13.475	9.7739	10.9127	0.1332	0.00097654	-0.047851	-11.6328	88.53	66.2602	0.00097656	-0.047852	0.054688	71.2361	257.297	671.6307	-0.80469	0.24561	-0.03955	-56.465	1.09479	35.2314	-0.080567	0.0093751	0.15039
0.376	26.236	7.2975	20.3127	0.1291	0.010254	-0.047558	-12.32	51.5661	39.5794	0.029297	-0.049316	0.05127	79.429	230.613	656.732	-0.74268	0.21924	-0.041992	-40.6825	-10.4347	0.9271	-0.036426	-0.025	0.15196
0.378	7.636	16.4064	9.83372	0.13086	0.020508	-0.050781	-7.761	42.0903	34.4167	0.055176	-0.047852	0.053223	97.0091	272.749	571.0615	-0.66699	0.18701	-0.044434	-77.679	-39.1751	-8.6324	0.016406	-0.060352	0.14854
0.38	7.752	23.839	22.9202	0.13086	0.024707	-0.051953	10.2844	67.228	30.214	0.084473	-0.060547	0.045898	83.099	217.6449	587.249	-0.62695	0.17578	-0.041504	-67.62	-16.7284	8.7482	0.077148	-0.099609	0.14111
0.382	4.174	17.2155	28.2628	0.13067	0.033789	-0.049414	2.034	5.575	27.50803	0.1001	-0.058105	0.046875	49.342	212.4622	517.905	-0.55371	0.13818	-0.039551	-3.4106	5.968	30.6197	0.14131	-0.14424	0.13916
0.384	23.8655	19.2261	9.0917	0.12793	0.042383	-0.049805	26.598	18.59396	30.2569	0.11963	-0.058594	0.040039	90.512	193.7407	520.16095	-0.49976	0.11377	-0.042724	-2.485	-4.4044	12.228	0.22793	-0.19697	0.13965
0.386	0.601000000000003	20.7067	1.751	0.12295	0.050977	-0.048535	45.073	25.5592	24.1312	0.1289	-0.060302	0.033447	53.132	207.31	433.751	-0.44434	0.09375	-0.039551	8.2262	-8.0462	-19.6124	0.31035	-0.24346	0.12637
0.388	-14.089	23.6042	20.0829	0.1123	0.061523	-0.04834	7.5759	-14.4996	18.4818	0.13965	-0.064941	0.026855	57.1144	213.493	445.014	-0.37695	0.066406	-0.039063	33.9613	-57.71	-2.3138	0.36826	-0.28086	0.093555
0.39	-3.086	3.075	79.686	0.11074	0.073828	-0.044727	15.4142	28.078	0.7968	0.15137	-0.06543	0.024414	18.862	173.1888	394.053	-0.33984	0.050293	-0.038574	31.25036	-19.54562	-11.32	0.4043	-0.30566	0.057129
0.392	11.136	-15.168	122.5195	0.10527	0.084473	-0.041406	32.663	-8.2027	-8.7147	0.15918	-0.062012	0.021484	19.668	174.976	383.496	-0.28271	0.022949	-0.040039	53.344	-19.9611	-14.598	0.42363	-0.31162	0.017578
0.394	-21.75	1.865	145.364	0.10215	0.095019	-0.041406	12.453	-11.8183	-2.6396	0.17334	-0.064941	0.016113	19.041	127.7863	351.26	-0.24585	0.0031738	-0.041992	117.902	26.5644	-9.567	0.44854	-0.31465	-0.011914
0.396	-57.637	8.3095	177.4237	0.099904	0.10479	-0.040723	24.0398	22.5875	-14.4603	0.18237	-0.06665	0.012451	11.771	156.125	319.6344	-0.21045	-0.013672	-0.042969	78.051	56.586	-18.336	0.48643	-0.31582	-0.034571
0.398	-46.398	7.7412	264.2377	0.095703	0.11377	-0.039551	14.2369	-26.2343	-6.66	0.19531	-0.077148	0.01123	-37.777	105.612	313.352	-0.16553	-0.030273	-0.050781	48.748	51.435	-14.1744	0.52334	-0.32617	-0.053125
0.4	-58.656	-7.6923	340.2938	0.093066	0.12305	-0.038477	14.03	20.7223	5.32834	0.19873	-0.07959	0.01123	-43.1262	150.989	270.1038	-0.15625	-0.034668	-0.056152	73.294	41.123	-0.1317	0.56201	-0.33936	-0.063965
0.402	-111.721	-11.495	374.841	0.092676	0.12832	-0.048633	8.1852	32.3701	-4.4131	0.20068	-0.08252	0.0048828	-30.121	97.27	230.8432	-0.13574	-0.040527	-0.056152	44.81063	10.1962	-1.6332	0.58125	-0.34804	-0.08291
0.404	-95.502	-49.3814	389.1675	0.08877	0.13222	-0.058008	13.9536	-8.8168	10.9314	0.21191	-0.082031	0.0014648	-27.086	141.853	148.481	-0.098389	-0.05542	-0.049316	43.9296	34.753	-0.329000000000001	0.60205	-0.34073	-0.089258
0.406	-81.131	-78.1213	425.554	0.081153	0.14092	-0.076758	4.7534	49.097	-1.21531	0.22485	-0.086181	0.00024415	-35.8985	66.063	165.3706	-0.061035	-0.078125	-0.038574	60.519	10.281	-3.1695	0.62315	-0.32627	-0.10801
0.408	-76.305	-76.4861	464.45	0.066895	0.15332	-0.094727	-7.3473	16.9978	-19.7599	0.23633	-0.087402	-0.0043945	-32.562	93.5457	124.7086	-0.014648	-0.10986	-0.017578	32.068	21.1408	-13.1341	0.64082	-0.30957	-0.12412
0.41	-74.545	-63.3405	502.617	0.034961	0.18701	-0.12314	-0.00100000000000122	-3.3701	4.6995	0.24902	-0.095703	-0.013672	-43.9926	39.114	136.73	0.0029297	-0.12256	-0.012695	-15.421	0.1831	2.5115	0.6499	-0.28857	-0.14502
0.412	-18.3486	-39.15385	510.9498	-0.01914	0.2251	-0.15371	-8.288	34.5393	-10.41568	0.25488	-0.096191	-0.02002	-32.539	114.23	57.955	0.025879	-0.13916	-0.0043945	14.2095	3.1032	20.8303	0.65244	-0.25342	-0.16279
0.414	-12.242	-13.5754	546.604	-0.096483	0.27744	-0.18692	-17.3717	-10.9162	2.9047	0.2666	-0.10303	-0.036621	14.795	89.098781	69.509	0.028321	-0.15087	-0.011963	16.228	13.782	16.7944	0.64531	-0.21202	-0.18115
0.416	-40.4562	17.017	593.698	-0.18886	0.33096	-0.21905	-0.194100000000001	7.632	4.04528	0.27026	-0.10938	-0.051514	-13.28	126.808	27.401	0.039063	-0.15088	-0.0087891	-9.947	15.057	33.084	0.63437	-0.16474	-0.19561
0.418	-43.7578	14.144	645.7229	-0.29688	0.38477	-0.24609	-1.8985	9.5661	-0.34947	0.27686	-0.11035	-0.06543	22.824	89.367	80.8407	0.059082	-0.14209	-0.0083008	-12.639	56.141	24.2455	0.61211	-0.1164	-0.19932
0.42	-12.5671	10.618	688.483	-0.40762	0.4373	-0.26445	-24.7147	-27.6893	15.9547	0.27783	-0.10693	-0.077148	21.184	112.073	33.611	0.067871	-0.14551	-0.0068359	-54.556	12.745	24.3747	0.58057	-0.066895	-0.19873
0.422	23.6695	4.6775	716.992	-0.52324	0.49414	-0.28057	-2.979	15.8012	14.81	0.27246	-0.10303	-0.087891	28.699	88.538	47.363	0.077637	-0.14941	-0.0087891	-59.351	19.5761	21.2011	0.54102	-0.021778	-0.20225
0.424	-6.744	5.621	750.914	-0.64121	0.55703	-0.29541	-21.2252	4.6988	-2.697	0.27344	-0.098145	-0.096191	19.526	58.634	17.7942	0.088379	-0.1482	-0.0046387	-50.48	-16.2847	42.483	0.48838	0.020215	-0.20009
0.426	-7.608	-6.02	773.884	-0.76074	0.61817	-0.3084	-13.808	-2.2565	14.3116	0.27197	-0.087402	-0.10425	77.806	21.5412	35.0446	0.095215	-0.14844	-0.0014648	-45.981	-21.4716	28.1892	0.43174	0.062012	-0.19306
0.428	-22.65	-10.171	780.0288	-0.87061	0.68896	-0.31543	16.1778	21.8385	0.9304	0.26514	-0.07373	-0.10596	33.271	19.1766	-7.0441	0.10498	-0.14453	0.0048828	-71.428	-8.1213	3.8039	0.36738	0.10254	-0.18174
0.43	24.189	-20.444	768.131	-0.9667	0.75713	-0.31904	-22.3668	-16.8447	0.539	0.25	-0.057617	-0.10303	71.971	32.951	-15.364	0.11328	-0.15088	0.016113	-80.029	-5.2264	7.7874	0.30322	0.13818	-0.16455
0.432	43.313	-48.4498	774.569	-1.0488	0.83164	-0.32813	19.44535	13.1315	8.6702	0.24658	-0.046387	-0.10596	56.317	28.4819	-1.9586	0.12451	-0.16016	0.024902	-58.303	21.0392	5.2359	0.24443	0.17636	-0.1458
0.434	61.869	-74.829	825.884	-1.1094	0.90234	-0.33672	17.1772	25.6945	-10.657	0.22852	-0.035645	-0.097656	48.841	43.213	21.2001	0.12842	-0.16626	0.036866	-34.6695	-7.3725	21.9394	0.20576	0.21386	-0.11572
0.436	72.8414	-100.775	863.4744	-1.1467	0.96699	-0.34551	5.752	-5.1277	15.2317	0.21704	-0.020996	-0.094482	10.284	3.6957	34.506	0.12207	-0.17334	0.050781	21.55168	-1.7093	7.0071	0.17022	0.24355	-0.088379
0.438	82.0617	-128.926	885.867	-1.1626	1.0298	-0.36279	24.299	28.36	13.7755	0.2041	-0.0092773	-0.091797	77.453	30.07998	18.2234	0.11768	-0.18115	0.062012	4.611	-36.457	-15.366	0.11689	0.25381	-0.057227
0.44	44.8033	-140.801	906.831	-1.1732	1.0581	-0.38525	6.1482	3.8432	-2.6328	0.18311	0.0083008	-0.081055	9.491	-1.2576	25.6776	0.11328	-0.18018	0.074707	12.5633	-15.0448	-19.5633	0.037598	0.28027	-0.035645
0.442	24.299	-163.92	940.396	-1.1961	1.0843	-0.41426	24.47719	3.2579	5.8762	0.17334	0.015137	-0.080566	12.931	32.8501	15.1374	0.10352	-0.18262	0.083984	27.965	-19.20416	2.987	-0.051758	0.32051	-0.019238
0.444	35.8728	-168.332	975.2342	-1.22	1.1067	-0.42636	20.2545	31.199	-16.4538	0.15967	0.028809	-0.072266	11.273	15.818	53.153	0.090088	-0.18384	0.099124	30.2798	3.9154	4.556	-0.13018	0.36045	-0.0083008
0.446	29.4176	-156.2087	1007.7744	-1.2419	1.1314	-0.43428	13.3459	-20.6695	4.3922	0.15039	0.037842	-0.071534	-9.841	59.055	-10.048	0.07373	-0.1792	0.10938	48.72	4.91035	-7.114	-0.19267	0.38896	0.0073242
0.448	15.4951	-129.70409	1007.8775	-1.2534	1.1421	-0.43896	10.1445	4.07223	15.8662	0.14209	0.049316	-0.069336	-22.2388	32.154	-0.446999999999999	0.049805	-0.17871	0.12158	74.303	-15.7399	-10.59428	-0.2372	0.41552	0.02832
0.45	-4.0411	-136.508	1033.78102	-1.2575	1.1421	-0.42432	17.568482	1.6562	-10.3392	0.14063	0.060547	-0.070801	-11.442	59.055	-2.2836	0.034668	-0.17334	0.12842	66.473	32.886	-9.1825	-0.27393	0.42822	0.039063
0.452	-2.396	-140.3915	1062.75925	-1.2465	1.127	-0.41621	14.7809	-25.66514	-9.5424	0.1377	0.063965	-0.069336	-56.578	-1.0946	51.129	0.0068359	-0.15869	0.13721	29.3858	14.8224	4.334	-0.30078	0.43613	0.053223
0.454	-10.672	-127.424	1070.107	-1.2258	1.1016	-0.40918	25.30302	10.5931	5.8327	0.13428	0.075195	-0.065918	-58.532	33.962	30.0754	-0.0095212	-0.15137	0.15283	66.83	44.922	-1.76	-0.32207	0.43877	0.059179
0.456	-20.002	-117.625	1088.133	-1.1929	1.0667	-0.40732	19.69004	-7.5141	6.98034	0.13354	0.086426	-0.067871	-48.2562	-9.9874	43.006	-0.020996	-0.13867	0.16455	64.232	20.1458	-6.9617	-0.33262	0.43291	0.067774
0.458	-8.61	-129.503	1106.93972	-1.1553	1.0332	-0.41016	0.335000000000001	-5.6945	9.213	0.1333	0.093262	-0.071777	-55.96822	23.293	0.2181	-0.041016	-0.13379	0.18262	85.387	8.7507	-12.2796	-0.33486	0.42432	0.069434
0.46	-3.563	-129.8945	1125.6898	-1.1097	1.0005	-0.41045	35.7507	38.602	-1.63731	0.13428	0.10547	-0.067871	-58.308	-26.2614	32.242	-0.047363	-0.12793	0.19238	56.398	13.9863	-27.281	-0.32617	0.41064	0.064941
0.462	-17.6694	-122.927	1157.102	-1.0726	0.97862	-0.42276	-13.239	-0.4632	-10.3155	0.1416	0.11084	-0.074707	-21.91	-14.7616	9.9016	-0.06543	-0.12305	0.20898	25.0427	18.6027	-24.043	-0.30361	0.39248	0.053906
0.464	-33.41677	-118.365	1180.293	-1.0425	0.96572	-0.43604	-6.234	1.62576	12.3131	0.14258	0.12402	-0.072754	-42.7835	-34.2519	-6.09063	-0.067871	-0.11744	0.21655	29.511	52.4391	3.4593	-0.27393	0.37383	0.03916
0.466	-41.5889	-111.264	1207.849	-1.0328	0.97061	-0.44922	5.5373	16.3282	-7.8531	0.14477	0.12745	-0.07666	-24.127	-6.8738	-13.601955	-0.071289	-0.1167	0.22314	-13.5386	38.925	35.1564	-0.23252	0.35664	0.016504
0.468	-30.299	-116.472	1230.615431	-1.0391	0.98438	-0.47266	-30.7365	-12.3802	-7.7135	0.14697	0.13135	-0.074707	7.5993	-2.1741	22.795	-0.07666	-0.11133	0.23242	-4.26	46.1338	65.211	-0.18457	0.33262	-0.012695
0.47	-61.3428	-112.529	1254.784	-1.064	1.0134	-0.49131	-1.8548	41.31	-1.0513	0.15186	0.13916	-0.072754	-18.424	0.8197	25.3358	-0.07373	-0.10938	0.23779	-30.4117	-17.0544	82.183	-0.14111	0.31104	-0.046875
0.472	-33.199	-120.1439	1276.424	-1.0989	1.0489	-0.51387	-14.6896	12.6446	-10.1685	0.15625	0.13965	-0.075195	-10.176	-9.7059	16.6462	-0.071777	-0.10791	0.23633	-41.963	-33.214	92.654	-0.09922	0.27461	-0.092386
0.474	-19.2693	-111.48943	1283.038	-1.1461	1.0906	-0.53144	-17.2504	-10.3603	-4.6818	0.15576	0.1416	-0.074219	38.813	-7.7453	-10.9282	-0.064697	-0.1084	0.23413	-50.389	-57.9615	113.8867	-0.069336	0.24804	-0.14492
0.476	3.30369	-100.882	1297.32353	-1.1933	1.1454	-0.55127	-4.2796	34.968	-4.1316	0.15771	0.14697	-0.072754	23.7118	-0.0594999999999999	-27.5239	-0.053711	-0.11328	0.22852	-84.138	-34.7977	175.094	-0.051758	0.22656	-0.19297
0.478	-18.8203	-111.03596	1321.6333	-1.2363	1.1836	-0.56348	-11.437	-10.5486	-0.347	0.15674	0.15381	-0.068848	13.287	-1.8591	-1.592	-0.033203	-0.11914	0.21289	-97.869	-26.7071	276.7566	-0.046191	0.21592	-0.24004
0.48	-25.88058	-110.7899	1338.0272	-1.2933	1.222	-0.58974	13.041	13.734	24.4191	0.15576	0.15771	-0.064453	66.17	30.826	-6.815	-0.018555	-0.12598	0.20117	-104.99	-51.116	405.087	-0.070313	0.21631	-0.28662
0.482	-10.607	-95.3361	1343.6543	-1.3652	1.2634	-0.61338	-2.2842	14.8797	19.6769	0.1543	0.15869	-0.062988	30.2	24.7275	-33.518	0.0058594	-0.1377	0.18555	-84.223	-26.3493	578.703	-0.13711	0.21641	-0.33203
0.484	15.4	-74.585	1332.4674	-1.4464	1.3087	-0.6376	-9.7981	-27.934	2.6476	0.14648	0.16357	-0.057129	53.364	57.122	-40.87	0.031738	-0.15063	0.17066	-161.06	-62.811	745.044	-0.23476	0.22519	-0.37402
0.486	13.976	-66.129	1339.8804	-1.5333	1.3671	-0.66338	29.7574	19.2006	-7.2399	0.13916	0.16455	-0.054688	57.462	11.50822	-2.2599	0.054688	-0.16357	0.15381	-158.543	-41.8184	885.935	-0.35625	0.24394	-0.40449
0.488	-16.5023	-69.3172	1360.657	-1.6226	1.4224	-0.68896	-2.334	-1.9181	-6.9572	0.13525	0.1709	-0.04834	40.7909	34.8123	-6.5621	0.086426	-0.17773	0.13184	-185.094	-43.8254	1034.668	-0.48662	0.26533	-0.43115
0.49	0.442000000000001	-50.613	1349.1937	-1.7056	1.4821	-0.71289	6.3221	1.9414	13.27406	0.12598	0.17432	-0.042969	41.2775	-1.929	16.1812	0.098389	-0.18676	0.11939	-179.534	-47.969	1112.138	-0.62891	0.29688	-0.45508
0.492	-3.4579	-39.0038	1338.3318	-1.7793	1.5476	-0.73711	17.8906	37.295	3.65548	0.11816	0.17822	-0.043457	47.72402	42.418	-10.3443	0.10938	-0.19434	0.10352	-55.4102	-74.791	1189.905	-0.78213	0.34424	-0.45859
0.494	-0.0246999999999999	-18.955	1328.415	-1.8543	1.6109	-0.76289	-3.1225	-13.4182	-4.892	0.11182	0.18604	-0.038086	16.3025	14.7692	2.7381	0.11523	-0.2002	0.084473	-1.957	-124.2172	1172.203	-0.96201	0.4001	-0.42685
0.496	-1.201	-26.3739	1356.842	-1.911	1.6687	-0.79736	25.7413	11.284	9.6397	0.10108	0.18457	-0.039063	1.334	44.836	3.6711	0.11475	-0.19824	0.069336	28.29	-137.87045	1157.477	-1.26	0.4458	-0.33349
0.498	5.751	-27.856	1350.202	-1.9531	1.7168	-0.82227	26.9141	26.937	1.0233	0.092773	0.18994	-0.041016	8.563	-0.892999999999999	13.3651	0.11475	-0.19531	0.054199	71.683	-161.953	1193.352	-1.6746	0.5126	-0.24629
0.5	-2.8167	-48.262	1354.589	-1.9756	1.7506	-0.84687	9.929	-5.8357	20.10836	0.085449	0.19678	-0.046387	-7.414	46.0047	-5.64894	0.10913	-0.1836	0.043457	129.869	-131.06	1189.658	-2.1484	0.60645	-0.20508
0.502	-25.93072	-57.436	1345.3517	-1.977	1.7739	-0.87188	45.607	25.9904	20.7892	0.075684	0.19653	-0.060791	-33.40688	26.4352	7.6926	0.10352	-0.17627	0.025391	135.0601	-184.611	1187.316	-2.578	0.74854	-0.15791
0.504	-9.1505	-61.9689	1354.0119	-1.9594	1.7844	-0.88164	5.9856	-9.3006	16.961	0.058594	0.19727	-0.077148	-15.089	51.225	30.755	0.085938	-0.16699	0.026855	185.276	-240.162	1137.431	-2.887	0.92041	-0.07705
0.506	1.402	-44.6436	1365.6466	-1.9326	1.783	-0.89024	16.2867	-41.9689	56.704	0.037109	0.21094	-0.104	-42.1562	17.0186	45.835	0.078613	-0.15723	0.0087891	184.901	-334.978	1104.955	-3.0397	1.0615	0.014355
0.508	-28.4178	-24.8113	1351.9697	-1.8906	1.7773	-0.89648	25.9615	-25.53	56.22	0.012207	0.21924	-0.11865	-36.8	42.675	36.1673	0.063965	-0.1416	-0.0092773	107.9139	-343.5766	1144.093	-3.0606	1.1546	0.064453
0.51	-41.5747	-23.52272	1356.595	-1.851	1.7608	-0.89571	-26.195	-60.4634	108.0688	-0.047363	0.23535	-0.14795	-48.21	3.868	9.88941	0.05249	-0.12573	-0.025635	102.031	-254.893	1173.8108	-2.9902	1.2207	0.061523
0.512	-41.014	-20.8371	1329.5396	-1.8074	1.7465	-0.89102	-17.8136	-34.623	199.7916	-0.10571	0.25	-0.17212	-30.8367	21.2546	15.7936	0.044922	-0.10742	-0.032227	125.066	-178.211	1198.034	-2.8397	1.2712	0.026563
0.514	-37.625	-32.9501	1330.691	-1.7703	1.7321	-0.88047	-7.256	-33.3898	266.581	-0.15527	0.27295	-0.18066	-74.994	7.3387	12.6291	0.039063	-0.083008	-0.046387	178.213	-119.15	1180.088	-2.6749	1.3138	-0.024707
0.516	-83.861	-23.4932	1317.7377	-1.7391	1.7199	-0.86992	-70.412	-79.6047	355.954	-0.24805	0.27734	-0.17432	-54.8448	32.688	19.2319	0.036133	-0.071289	-0.057617	173.938	-155.939	1196.906	-2.5073	1.3517	-0.074707
0.518	-51.81	-17.733	1305.567	-1.7183	1.7075	-0.86279	-73.39694	-60.9282	438.818	-0.31299	0.27881	-0.1792	-30.98926	29.0457	2.694	0.035645	-0.049805	-0.069824	157.337	-168.122	1274.8919	-2.354	1.3593	-0.12393
0.52	-35.87	3.2174	1307.752	-1.7106	1.702	-0.84961	-124.7197	-60.9912	526.401	-0.49023	0.31543	-0.19141	-15.839	15.4745	9.3239	0.02832	-0.036621	-0.081543	145.832	-195.5302	1372.595	-2.2324	1.334	-0.16162
0.522	-62.728	25.3643	1281.8784	-1.7056	1.7009	-0.83662	-161.756	-54.1573	620.21986	-0.63965	0.35523	-0.19214	-11.4408	3.1085	34.34	0.013672	-0.023926	-0.095703	114.398	-198.967	1453.172	-2.1706	1.2696	-0.1791
0.524	-75.153	22.7622	1258.768	-1.7118	1.7009	-0.82646	-113.0853	-3.212	669.981	-0.78662	0.39795	-0.17236	-18.374	-18.2747	30.615	-0.0024414	-0.0014648	-0.1123	93.609	-244.581	1488.102	-2.1745	1.1841	-0.19873
0.526	-38.7779	21.7163	1270.533	-1.7174	1.7037	-0.80918	-112.074	-35.053	707.759	-1.0034	0.48096	-0.12646	3.27	-5.84716	27.1261	-0.016602	0.0043945	-0.12012	-9.335	-299.481	1459.669	-2.2499	1.0899	-0.1999
0.528	-13.0231	32.6001	1280.3107	-1.7222	1.7017	-0.80127	-23.2791	-57.733	776.807	-1.1069	0.521	-0.094238	9.044	-10.7633	22.2994	-0.032227	0.022949	-0.13135	-30.1278	-371.297	1448.604	-2.3696	0.99992	-0.18955
0.53	-47.766	40.82	1264.858	-1.7264	1.6967	-0.78965	13.144	-72.4968	796.566	-1.3613	0.58008	-0.035645	47.8593	10.2311	16.7207	-0.040528	0.038819	-0.14746	-59.961	-388.967	1462.0652	-2.5156	0.93945	-0.17773
0.532	-40.232	37.5415	1250.603	-1.7285	1.6875	-0.77735	-21.358	-91.2401	820.316	-1.5781	0.6377	-0.00024415	28.034358	-40.0432	7.3185	-0.052246	0.052246	-0.15479	-59.505	-307.643	1515.136	-2.6499	0.90361	-0.16357
0.534	-9.5033	32.0864	1233.397	-1.7254	1.6703	-0.76172	63.339	-39.7906	859.893	-1.7813	0.70703	0.027344	32.486	-4.66786	-11.15659	-0.061035	0.063965	-0.1665	-33.6007	-253.866	1568.264	-2.7656	0.89844	-0.15996
0.536	5.8945	35.9946	1206.137	-1.7165	1.6499	-0.74814	51.266	-24.6783	849.26	-2.0874	0.78369	0.06543	51.4395	-21.3151	-18.359	-0.068359	0.071777	-0.17676	-74.516	-187.266	1586.5993	-2.8598	0.93086	-0.17597
0.538	-34.8569	26.7921	1165.8183	-1.7012	1.627	-0.72803	19.465	-73.559	866.418	-2.2422	0.83203	0.069336	59.4379	29.8085	-21.52304	-0.074219	0.078125	-0.18848	-52.571	-169.5724	1588.84	-2.9365	0.99979	-0.19473
0.54	-32.8008	15.978	1153.201	-1.6786	1.6003	-0.7122	64.94	-97.433	862.84907	-2.5117	0.9707	0.04248	37.6811	-21.6136	3.564	-0.084473	0.079346	-0.19532	-63.161	-145.861	1592.822	-2.9976	1.0854	-0.21338
0.542	6.3183	24.404	1156.475	-1.6543	1.5676	-0.69511	30.33637	-173.618	896.002	-2.6004	1.0569	0.041748	36.216	31.267	-32.2179	-0.086914	0.082031	-0.20264	-41.282	-95.281	1632.053	-3.0369	1.1795	-0.23652
0.544	16.9369	40.792	1148.2932	-1.6281	1.536	-0.6791	50.7242	-179.3613	995.46	-2.6089	1.1216	0.062988	54.45686	-10.40197	2.6995	-0.091797	0.077148	-0.22314	-60.886	-49.053	1634.8181	-3.0656	1.2759	-0.2581
0.546	9.6263	46.4386	1125.9517	-1.5966	1.5038	-0.66377	77.288	-133.864	1022.238	-2.4976	1.1509	0.089844	46.302	43.884	6.2654	-0.089844	0.07666	-0.22803	-70.658	-5.501	1593.747	-3.0702	1.3634	-0.28037
0.548	-3.774	45.4482	1114.0971	-1.562	1.4731	-0.65186	58.4078	-152.67	1032.2183	-2.4307	1.1504	0.089844	30.4708	-6.3421	33.695	-0.086914	0.061523	-0.24854	-85.295	-29.975	1557.455	-3.0582	1.4414	-0.30469
0.55	29.0252	64.2136	1110.691	-1.5267	1.4405	-0.63916	128.387	-148.02	1038.6822	-2.291	1.1465	0.051758	-1.58	14.397	47.058	-0.081543	0.047119	-0.2705	-119.378	-69.0479	1529.503	-3.0254	1.502	-0.32861
0.552	4.65	70.507	1077.013	-1.4891	1.4074	-0.62715	108.734	-187.076	1000.604	-2.1961	1.1301	0.01416	-18.062	-50.88	59.687	-0.07666	0.033203	-0.29102	-65.617	-84.7472	1559.992	-2.981	1.544	-0.34854
0.554	-28.7918	72.282	1031.49353	-1.45	1.3746	-0.61738	112.819	-244.619	1077.915	-2.1011	1.1079	-0.022949	-6.379	14.323	70.405	-0.077148	0.017578	-0.3125	-14.319	-79.6593	1579.499	-2.9398	1.5781	-0.36553
0.556	-12.2485	75.8034	1000.184	-1.4139	1.3407	-0.60693	152.494	-208.1341	1131.542	-1.998	1.0391	-0.069824	0.420999999999999	-22.122	139.3208	-0.085449	0.0078125	-0.31885	18.1889	-56.85	1561.185	-2.9055	1.5984	-0.37998
0.558	28.4224	79.6044	992.8581	-1.377	1.3086	-0.59668	120.551	-233.275	1178.9954	-1.9512	0.98828	-0.096191	4.705	-0.257999999999999	187.5749	-0.11719	0.0053711	-0.32471	15.746	-65.185	1569.1113	-2.8844	1.6059	-0.38867
0.56	-5.085	78.00154	970.556	-1.3343	1.277	-0.57998	112.188	-258.593	1254.214	-1.875	0.90527	-0.12793	-13.2	-32.4836	240.325	-0.16773	0.0061036	-0.33252	56.9	-88.388	1549.501	-2.8672	1.6055	-0.38721
0.562	-77.653	87.353	939.533	-1.2926	1.2485	-0.5668	73.909	-250.241	1259.829	-1.8513	0.84594	-0.12817	-17.079	6.562	290.9877	-0.22998	0.012695	-0.33496	89.665	-93.119	1604.063	-2.8488	1.5957	-0.38281
0.564	-33.0889	87.156	923.914	-1.2543	1.2203	-0.55039	28.5599	-290.12	1293.9404	-1.856	0.79541	-0.13965	-22.134	25.4845	354.6341	-0.33057	0.028809	-0.32129	97.164	-33.9904	1605.442	-2.8195	1.5723	-0.37031
0.566	0.317	83.1213	922.2277	-1.2209	1.1858	-0.54141	41.79747	-248.968	1359.4582	-1.9194	0.7583	-0.14453	-29.231	78.976	447.18	-0.39209	0.041016	-0.31006	97.774	3.069	1588.2757	-2.7789	1.5324	-0.35508
0.568	-21.8593	79.5139	901.457527	-1.1851	1.1548	-0.52832	-3.1132	-170.3768	1351.443	-1.9707	0.74609	-0.14648	-41.4276	112.371	555.1153	-0.52734	0.067871	-0.28223	59.081	41.6197	1523.13918	-2.7212	1.4804	-0.33311
0.57	-64.425	80.4268	878.2154	-1.142	1.1221	-0.51543	-27.0747	-164.9927	1375.805	-2.1016	0.76953	-0.14014	-43.421	117.823	641.221	-0.63965	0.093748	-0.2583	17.065	42.2082	1476.5788	-2.6504	1.418	-0.31104
0.572	0.719000000000001	97.466	841.1767	-1.0966	1.0833	-0.4999	-7.2818	-105.431	1396.625	-2.2027	0.80273	-0.14624	-17.023	103.402	737.192	-0.77881	0.11475	-0.21924	27.11616	63.46	1480.1696	-2.5675	1.3474	-0.28779
0.574	7.8768	91.8254	826.754	-1.054	1.0454	-0.48155	-36.8373	-109.788	1401.184	-2.3086	0.84277	-0.14209	-38.513	52.252	794.42	-1.0483	0.11816	-0.146	67.807	92.029	1479.629	-2.4866	1.2759	-0.2665
0.576	-51.4553	91.493	791.2087	-1.0174	1.0082	-0.46718	20.182	-149.87	1457.118	-2.4355	0.9082	-0.13867	-27.53847	7.464	869.296	-1.2197	0.13086	-0.11865	66.857	95.035	1467.296	-2.394	1.2075	-0.2458
0.578	-56.8466	84.005	754.908	-0.97949	0.96875	-0.44922	21.573	-113.737	1456.003	-2.4819	0.94385	-0.13672	-5.644	-55.913	959.466	-1.582	0.19922	-0.080078	41.422	127.836	1396.02123	-2.3051	1.1449	-0.21933
0.58	2.886	98.89	765.434	-0.94248	0.9335	-0.43389	-36.6026	-119.182	1461.254	-2.6094	1.0313	-0.14844	42.232	-50.266	956.703	-1.8491	0.29248	-0.040527	-10.9537	124.557	1326.905	-2.2202	1.0923	-0.19385
0.582	18.6401	105.131	757.884	-0.90576	0.89892	-0.42324	-24.43236	-99.943	1494.0994	-2.7027	1.1226	-0.16357	65.931908	-91.202	962.995	-2.1128	0.41064	0.024902	-22.1006	134.904	1306.3427	-2.142	1.042	-0.17422
0.584	-36.843	102.3487	722.4759	-0.86787	0.86651	-0.41191	-44.069	-61.845	1475.3476	-2.791	1.2129	-0.17725	84.857	-88.5926	920.892	-2.4648	0.58008	0.10498	-19.104	134.2383	1327.682	-2.0679	0.99581	-0.16016
0.586	-12.355	87.6015	691.1791	-0.82802	0.8292	-0.40069	-54.4665	-119.9053	1515.9176	-2.873	1.332	-0.19336	33.4279	-170.919	924.6565	-2.627	0.6748	0.13525	-29.2516	124.9637	1332.547	-2.0007	0.95675	-0.14765
0.588	31.0698	93.5354	681.826	-0.79492	0.79688	-0.39063	-5.878	-124.83114	1531.78368	-2.9004	1.3867	-0.19678	8.9002	-160.661	947.226	-2.8472	0.86182	0.13086	-28.5294	112.7703	1305.895	-1.9262	0.91524	-0.14043
0.59	33.888	110.68	651.42219	-0.75908	0.76865	-0.3835	-50.578	-136.2272	1536.5721	-2.9097	1.4751	-0.20752	34.2755	-190.265	994.137	-2.8728	1.0061	0.098388	-53.394	117.377	1252.6477	-1.8569	0.87256	-0.1333
0.592	1.329	96.013	606.4906	-0.72354	0.74102	-0.37656	-37.579	-166.288	1572.384	-2.8992	1.5159	-0.2129	20.6518	-136.119	1035.056	-2.7734	1.123	0.054199	-111.187	144.3861	1233.0197	-1.7832	0.83016	-0.12334
0.594	4.612	92.265	576.99396	-0.69111	0.71094	-0.37148	-14.4839	-115.882	1565.251	-2.875	1.5449	-0.22168	-10.916	-215.755	1085.569	-2.5054	1.2134	-0.057617	-87.668	176.388	1246.005	-1.7097	0.78707	-0.11238
0.596	57.47799	108.615	575.149	-0.65459	0.68477	-0.3624	-15.9719	-127.841	1562.215	-2.8301	1.5566	-0.23828	-34.7583	-188.309	1070.347	-2.3457	1.2285	-0.11279	-52.5633	186.585	1226.8722	-1.6378	0.73862	-0.097942
0.598	41.3842	114.345	553.7993	-0.61865	0.65869	-0.35498	49.318	-120.077	1568.416	-2.8022	1.5552	-0.23975	-17.442	-224.275	1099.2157	-2.0269	1.2065	-0.21777	-39.1186	140.477	1177.6087	-1.5671	0.69644	-0.093554
0.6	23.953	106.968	531.0585	-0.58086	0.63203	-0.34512	59.0403	-65.2701	1533.335	-2.752	1.5273	-0.23633	7.243	-143.709	1114.457	-1.8318	1.1321	-0.27563	-22.2676	131.259	1109.697	-1.4844	0.64844	-0.089355
0.602	17.912	107.995	508.022	-0.54765	0.60351	-0.34229	30.5124	-77.7392	1527.7838	-2.7088	1.4964	-0.22876	-3.6801	-140.917	1149.412	-1.6909	1.02	-0.32568	-18.3372	133.476	1044.1155	-1.4128	0.60095	-0.086629
0.604	51.8502	101.8825	488.0165	-0.51328	0.57383	-0.3333	70.394	-29.153	1529.6764	-2.6753	1.4595	-0.21826	-18.5703	-90.37	1160.108	-1.5874	0.80908	-0.35498	-11.217	191.238	1024.264	-1.3318	0.55202	-0.088201
0.606	18.554	91.05921	466.377	-0.48437	0.54512	-0.32578	27.9902	1.799	1519.065	-2.6367	1.4189	-0.19922	-2.7545	-142.307	1175.261	-1.5635	0.69922	-0.37598	-3.977	234.759	987.278	-1.2526	0.504	-0.090486
0.608	-1.618	91.2259	445.0923	-0.45752	0.51611	-0.31885	34.99	-43.0268	1561.391	-2.6265	1.3931	-0.19238	-11.064	-160.02	1190.6295	-1.5669	0.48486	-0.36963	6.663	218.013	925.339	-1.1711	0.45678	-0.093943
0.61	31.9015	102.099	437.252	-0.43604	0.49307	-0.30537	69.353	1.223	1520.2596	-2.5972	1.354	-0.16504	-16.1344	-209.1156	1265.148	-1.6162	0.35498	-0.3457	16.0741	227.902	839.329	-1.0923	0.40967	-0.09668
0.612	37.829	100.869	408.648	-0.41162	0.46826	-0.29532	16.7557	-24.0297	1466.759	-2.58	1.3272	-0.14233	-60.5295	-223.627	1294.732	-1.6948	0.25244	-0.31592	34.1859	234.6667	817.213	-1.0107	0.36056	-0.098335
0.614	0.489999999999998	87.916	373.8738	-0.38857	0.44131	-0.28204	30.7683	-25.6611	1473.338	-2.5659	1.3013	-0.12354	-73.453	-204.22	1324.4743	-1.8608	0.18359	-0.2627	52.7895	287	816.4242	-0.92906	0.31587	-0.10068
0.616	-33.149	87.958	356.18729	-0.36514	0.41611	-0.27452	25.1774	32.7609	1421.507	-2.5449	1.2813	-0.10742	-127.519	-197.447	1336.403	-1.9663	0.17725	-0.23389	93.269	326.046	834.11	-0.85385	0.2754	-0.10087
0.618	22.244	97.443	355.1462	-0.3418	0.39258	-0.26563	-12.2108	-12.7306	1460.466	-2.5332	1.2725	-0.097168	-118.67	-141.6227	1335.9502	-2.2007	0.23486	-0.18945	99.138	316.085	775.1768	-0.78391	0.23307	-0.099781
0.62	19.179	94.055	338.2899	-0.32158	0.3707	-0.25283	35.515	5.7563	1484.129	-2.4902	1.25	-0.086914	-72.745	-149.6119	1379.9496	-2.3843	0.31738	-0.17383	96.097	255.217	671.862	-0.71484	0.19141	-0.1001
0.622	-23.293	100.258	313.1296	-0.29893	0.34765	-0.24697	-4.9136	-6.1838	1439.752	-2.4558	1.241	-0.077392	-28.701	-106.217	1430.613	-2.5508	0.41797	-0.16748	91.286	202.5419	618.935	-0.64592	0.15171	-0.096043
0.624	-17.545	79.6021	296.62107	-0.27314	0.32109	-0.22627	-17.4252	-68.033	1458.237	-2.4136	1.2251	-0.071777	-14.615	-150.915	1462.08017	-2.7183	0.57568	-0.18213	91.232	208.827	576.90469	-0.57915	0.11687	-0.097736
0.626	-1.422	77.9237	290.176	-0.25039	0.29521	-0.21699	-14.3536	12.5562	1434.457	-2.3477	1.2051	-0.063477	15.566	-88.326	1455.913	-2.7729	0.65869	-0.19092	88.916	215.975	608.235	-0.50744	0.090466	-0.10226
0.628	-5.229	73.7727	271.422	-0.22461	0.27441	-0.2085	-78.273	31.759	1382.489	-2.3081	1.1919	-0.063965	40.0731	-95.598	1455.245	-2.8242	0.8125	-0.23438	85.944	231.635	571.099	-0.43294	0.060941	-0.11825
0.63	-42.077	82.776	246.8139	-0.20273	0.25117	-0.19727	-42.075	37.717	1391.1094	-2.2339	1.1577	-0.060059	73.7635	-11.679	1455.799	-2.8242	0.94727	-0.29102	64.459	193.9427	493.3468	-0.37695	0.049316	-0.14258
0.632	7.156	88.72	239.747	-0.1836	0.22949	-0.18282	-62.868	77.571	1336.23486	-2.1714	1.1289	-0.06128	87.1001	-42.811	1502.743	-2.8179	1.0044	-0.32568	27.6848	169.138	429.9915	-0.32955	0.028388	-0.14227
0.634	20.126	79.307	236.501	-0.16953	0.21114	-0.17774	-91.806	15.871	1325.2903	-2.1108	1.1001	-0.062988	120.5643	6.25	1462.929	-2.7676	1.0996	-0.40234	39.644	166.425	409.988	-0.2614	-0.034547	-0.12803
0.636	-4.399	78.146	223.1822	-0.15293	0.19366	-0.1708	-44.105	35.999	1348.178	-2.0273	1.0488	-0.054688	84.0508	-67.6926	1470.8635	-2.7117	1.1369	-0.44702	44.247	206.7685	415.024	-0.18661	-0.095416	-0.11205
0.638	-23.0696	61.1605	200.2254	-0.14063	0.1748	-0.16357	-69.187	79.434	1288.1117	-1.9878	1.022	-0.051758	55.6175	-22.5837	1488.342	-2.644	1.1489	-0.48682	32.754	219.083	392.341	-0.11379	-0.13983	-0.10473
0.64	28.6595	49.8513	201.791	-0.1247	0.1623	-0.14638	-54.999	56.511	1267.4801	-1.9097	0.96533	-0.044434	52.0914	-92.637	1510.2007	-2.5562	1.1294	-0.51709	39.4189	161.223	351.866	-0.049316	-0.16455	-0.11279
0.642	35.878	50.3802	204.96	-0.11601	0.14823	-0.13524	-34.985	121.211	1227.4844	-1.8242	0.91748	-0.038574	69.353	-27.734	1491.83	-2.5269	1.104	-0.52295	0.510999999999999	134.128	274.091	0.0065449	-0.18022	-0.1254
0.644	3.746	54.9485	177.2475	-0.10271	0.12673	-0.12626	-70.929	98.6168	1167.899	-1.7832	0.88867	-0.040039	116.523	-76.838	1521.801	-2.4805	1.0488	-0.52344	-40.8836	97.246	228.3302	0.059244	-0.19058	-0.13786
0.646	25.629	53.5673	152.4073	-0.091787	0.10037	-0.11767	1.399	86.5428	1160.163	-1.6987	0.83057	-0.043457	119.617	-38.187	1476.647	-2.4712	0.99904	-0.5122	-22.535	135.995	232.1525	0.10325	-0.20187	-0.14944
0.648	17.284	56.4322	141.485	-0.072754	0.078125	-0.10693	19.4057	138.092	1126.654	-1.635	0.79223	-0.043457	86.944	-78.832	1525.467	-2.4722	0.94971	-0.50146	-28.632	174.605	196.491	0.13984	-0.22245	-0.1551
0.65	39.2915	64.91	147.34	-0.050026	0.055511	-0.091632	-3.0069	80.9011	1132.3371	-1.5669	0.74951	-0.05127	103.4464	-33.3234	1495.964	-2.4663	0.89014	-0.4834	-52.441	175.791	143.82	0.17139	-0.2373	-0.16162
0.652	26.941	60.5682	143.1379	-0.032968	0.03203	-0.087117	27.928	105.7612	1135.743	-1.4824	0.70313	-0.061035	109.668	-56.7876	1518.656	-2.4565	0.86963	-0.47217	-34.9095	142.6212	92.773	0.18379	-0.25365	-0.16439
0.654	32.4	51.4861	134.1474	-0.017726	0.0050787	-0.084776	4.0296	121.6384	1090.876	-1.4385	0.68262	-0.069336	76.311	-8.236	1500.0045	-2.4233	0.82666	-0.46924	-27.4862	98.735	72.117	0.19411	-0.26686	-0.17043
0.656	16.932	54.4074	118.748	-0.0021833	-0.018993	-0.081929	20.4225	81.388	1063.6985	-1.3574	0.64258	-0.08252	43.726	-18.3707	1492.5949	-2.3864	0.80737	-0.46557	-37.692	70.402	95.931	0.18845	-0.27261	-0.174
0.658	29.4713	57.2057	105.1266	0.010254	-0.039551	-0.081543	69.912	152.202	1019.6283	-1.2825	0.60864	-0.087158	7.685	20.4828	1434.2302	-2.3359	0.79199	-0.46484	6.575	47.87	109.1031	0.1801	-0.26735	-0.18202
0.66	38.2537	48.6553	105.669	0.019555	-0.053401	-0.077232	34.0412	124.344	979.153	-1.2148	0.57031	-0.088379	8.718	16.403	1430.9227	-2.2656	0.77539	-0.46191	7.947	63.1446	72.8	0.15869	-0.25684	-0.18799
0.662	-8.511	41.9917	97.6072	0.026213	-0.063177	-0.077281	63.689	101.719	979.57816	-1.1304	0.5249	-0.098145	-43.458	47.8784	1369.079	-2.2256	0.76465	-0.45508	-4.275	46.969	34.399	0.13243	-0.23766	-0.1921
0.664	5.966	47.9992	76.869	0.025938	-0.079253	-0.069191	36.121	147.5739	919.8022	-1.0991	0.50439	-0.10742	-17.121	69.883	1357.405	-2.1426	0.75	-0.45898	37.7478	66.207	29.4482	0.10455	-0.21172	-0.18952
0.666	20.628	52.396	55.09711	0.025424	-0.088425	-0.06192	20.6848	101.7028	912.5464	-1.0195	0.4707	-0.1167	-47.9332	72.488	1363.0148	-2.0838	0.73901	-0.45288	53.42	57.072	51.7672	0.072951	-0.18909	-0.1825
0.668	15.316	44.3683	50.1999	0.021973	-0.096191	-0.057129	85.582	131.6985	876.011	-0.96167	0.44239	-0.12061	-54.093	104.4549	1337.3009	-2.0254	0.72656	-0.44141	42.4149	52.527	57.005	0.035696	-0.16402	-0.16939
0.67	-17.818	42.4047	68.4092	0.019214	-0.10371	-0.049529	27.372	154.432	821.7421	-0.90381	0.41309	-0.11719	-41.54	78.9545	1338.304	-1.9546	0.70752	-0.43311	65.104	25.5067	37.0633	0	-0.13818	-0.1543
0.672	-5.045	44.3593	65.8958	0.014349	-0.11152	-0.039926	38.2689	128.649	803.3083	-0.83008	0.36523	-0.11523	-15.151	105.695	1265.61	-1.9199	0.69824	-0.42871	77.202	-8.1488	4.3511	-0.027909	-0.10276	-0.12521
0.674	-8.825	37.2844	64.915	0.014238	-0.1166	-0.034152	57.973	178.071	744.4892	-0.79102	0.3457	-0.11426	-42.08	95.299	1260.355	-1.8491	0.67822	-0.40771	25.1674	19.38	-40.744	-0.061797	-0.06985	-0.1012
0.676	-36.6246	40.179	59.6937	0.008958	-0.12204	-0.021879	-18.7675	163.283	715.311	-0.72803	0.30566	-0.10889	-18.749	130.114	1255.182	-1.8032	0.65771	-0.39111	76.901	14.8161	-14.903	-0.087179	-0.041728	-0.073462
0.678	-27.0634	22.6608	64.5699	0.0048828	-0.13184	-0.0097656	15.41219	143.1547	717.1756	-0.67651	0.28027	-0.10816	-25.754	90.137	1252.857	-1.7554	0.64307	-0.37451	70.3	26.9029	7.881	-0.11639	-0.0095827	-0.047667
0.68	-12.408	16.9875	65.921	-0.0001731	-0.13147	-0.0063662	-0.363	180.472	653.7641	-0.63281	0.25293	-0.10791	3.35	140.96	1185.684	-1.6909	0.62646	-0.33643	34.8283	15.1397	5.16049	-0.15527	0.021973	-0.01709
0.682	-8.721	31.945	42.1961	-0.0026224	-0.13458	-0.00028088	-29.995	149.5289	621.939	-0.57861	0.21826	-0.10889	4.2207	102.63633	1222.535	-1.6577	0.61768	-0.31982	34.92	16.7279	23.2064	-0.19552	0.052057	0.0038145
0.684	-29.348	37.171	20.5688	-0.012232	-0.13659	0.0040854	-0.936	173.839	605.895	-0.55322	0.21191	-0.10596	22.3551	173.138	1172.5777	-1.5977	0.58984	-0.29004	27.10078	47.373	2.775	-0.23781	0.086241	0.030866
0.686	-2.45	26.984	25.8129	-0.023128	-0.13278	0.0060139	-42.166	177.978	552.672	-0.49805	0.18262	-0.11035	26.2373	139.643	1199.057	-1.5549	0.57592	-0.26318	5.04963	53.025	23.74	-0.26905	0.11827	0.055475
0.688	-5.517	17.7454	38.5581	-0.029297	-0.13721	0.0068359	-44.611	131.7859	536.5788	-0.44751	0.16162	-0.10595	11.213	188.90515	1097.5523	-1.5073	0.56299	-0.24268	45.9419	55.621	46.266	-0.29453	0.13877	0.072268
0.69	-27.3539	19.0288	34.4865	-0.038922	-0.14487	0.0078031	4.4497	160.148	518.1884	-0.40918	0.13623	-0.10059	9.09308	145.604	1077.489	-1.4429	0.55029	-0.21973	19.864	14.87351	26.2593	-0.30273	0.15234	0.091309
0.692	-3.405	15.2687	30.6118	-0.045169	-0.14776	0.007954	-35.2508	121.5652	472.6624	-0.35303	0.1123	-0.099609	36.746	203.7798	1041.8414	-1.4126	0.54932	-0.20605	-27.90447	-15.398	-17.5447	-0.30429	0.15645	0.10517
0.694	24.4315	21.3901	38.8815	-0.053034	-0.15428	0.0083008	-3.553	109.6392	452.9745	-0.32178	0.098145	-0.092773	69.637	168.6561	1059.963	-1.3413	0.54932	-0.17725	-8.116	-49.079	-22.8336	-0.29102	0.15703	0.11924
0.696	23.212	32.734	46.1792	-0.067746	-0.15485	0.011931	-6.944	153.439	397.0183	-0.27344	0.077148	-0.092285	58.367	212.567	982.8996	-1.2862	0.55127	-0.16137	-28.223	-17.7726	12.8558	-0.26719	0.14922	0.12588
0.698	-13.098	35.006	26.2018	-0.083008	-0.15234	0.015625	-27.52	111.3054	376.048	-0.22729	0.058594	-0.086914	69.947	186.628	972.109	-1.2358	0.55518	-0.14307	-58.203	-15.8784	35.6217	-0.23936	0.13017	0.12373
0.7	10.106	28.5386	11.643	-0.094168	-0.14897	0.011039	43.2714	137.622	370.5601	-0.19629	0.04248	-0.087891	47.5405	234.965	904.1426	-1.1646	0.55518	-0.12402	-54.6772	-4.965	57.186	-0.20166	0.10596	0.11914
0.702	13.142	31.536	5.6587	-0.11026	-0.14238	0.0063477	0.356999999999999	108.8932	347.44	-0.15918	0.026855	-0.091797	44.591	213.375	910.748	-1.1265	0.55127	-0.11035	-41.932	0.944000000000001	6.46526	-0.15996	0.079784	0.12109
0.704	34.2527	30.3581	15.2787	-0.12318	-0.13153	0.0090159	12.3615	85.4571	339.0264	-0.13965	0.015625	-0.089355	45.629	255.002	858.847	-1.0649	0.54297	-0.087402	-78.79	-23.4135	-5.5788	-0.11679	0.055273	0.11973
0.706	28.8401	13.9737	18.9491	-0.13603	-0.11883	0.0045016	22.58196	124.8814	301.279	-0.099121	-0.0019531	-0.081055	53.292	229.0374	816.527	-1.019	0.53076	-0.077881	-59.735	-2.6102	-1.487	-0.076562	0.031445	0.11934
0.708	7.069	3.00852	22.1693	-0.14551	-0.10449	0.0014648	25.6143	104.2876	268.138	-0.085937	-0.019043	-0.081787	-6.184	229.841	795.451	-0.97217	0.52197	-0.063965	-24.5468	-14.2796	14.866	-0.037793	-2.8651e-07	0.12529
0.71	41.2944	14.9382	14.6465	-0.14989	-0.086031	0.0044319	65.0586	109.8144	254.64198	-0.077148	-0.027832	-0.07666	-23.46752	191.71	749.448	-0.90771	0.50049	-0.043945	-46.681	-8.6241	-1.443	-0.0019531	-0.029297	0.12891
0.712	33.81	33.2689	11.79198	-0.14907	-0.058594	0.0091823	49.4199	144.292	207.397	-0.071777	-0.03418	-0.081055	-84.819	181.2	692.617	-0.87793	0.49121	-0.036133	8.5948	-18.4817	-7.1419	0.029688	-0.06377	0.13525
0.714	19.472	22.7307	29.74516	-0.16117	-0.061346	-0.01856	64.464	87.2391	202.677	-0.070313	-0.031738	-0.083496	-61.03	172.76	660.26	-0.81885	0.46826	-0.023926	19.035	-18.2042	-23.10587	0.051758	-0.092578	0.12783
0.716	-18.09	11.9714	28.2472	-0.13991	-0.02924	-0.0028921	62.976	89.8076	184.341236	-0.078613	-0.027832	-0.083008	-92.246	179.2951	597.066	-0.77124	0.45239	-0.018555	12.826	24.3664	-39.835	0.062305	-0.11719	0.12041
0.718	21.0815	17.3889	5.70634	-0.12695	-0.0053711	-0.00048828	60.107	86.8319	176.39243	-0.077881	-0.025391	-0.072998	-93.242	177.656443	557.529	-0.72021	0.43213	-0.0092773	12.94	50.365	-2.574	0.07334	-0.1376	0.10801
0.72	14.6827	21.7948	-2.1888	-0.13104	-0.0091577	-0.028088	73.441	55.2845	187.3421	-0.074707	-0.020508	-0.0625	-93.274	176.1254	548.446	-0.65332	0.39795	-0.0068359	28.9176	68.476	-0.183000000000003	0.077637	-0.14893	0.099121
0.722	-21.7918	27.1748	6.66684	-0.11625	0.0022852	-0.03727	68.3231	96.5493	155.7998	-0.081055	-0.015137	-0.057617	-79.139	200.55	472.219	-0.61475	0.38428	-0.003418	34.401	35.103	7.6051	0.09082	-0.16973	0.082617
0.724	-7.698	14.08534	17.2549	-0.092	0.037876	-0.01181	28.09069	79.6599	128.473	-0.080078	-0.011719	-0.051758	-77.498	181.576	460.458	-0.54736	0.3501	0.00048828	31.79	11.781	3.7814	0.10195	-0.18633	0.078418
0.726	-4.43	3.5791	16.0884	-0.096775	0.035461	-0.036123	34.6651	65.4679	114.3795	-0.07959	0.0019531	-0.039551	-68.578	195.906	432.454	-0.50146	0.32642	0.0058594	55.45	-24.7043	-4.42845	0.11875	-0.2039	0.072559
0.728	-5.19	14.369	0.3942	-0.09082	0.016113	-0.060059	5.7585	87.7163	86.603	-0.074707	0.0092774	-0.033204	-95.589	175.904	405.9648	-0.45947	0.29639	0.01709	44.3255	-5.4168	-8.6511	0.12783	-0.21885	0.064453
0.73	-37.8249	18.3827	21.5375	-0.050386	0.062799	-0.010245	5.2237	55.0113	89.3172	-0.072266	0.017578	-0.02832	-77.1	205.478	377.4384	-0.41797	0.26758	0.019043	72.384	5.376	-0.2564	0.13818	-0.22754	0.057617
0.732	-3.664	21.9517	31.6394	-0.059185	0.04803	-0.035071	22.1987	64.71575	91.1287587	-0.0625	0.027344	-0.02002	-70.813	161.6148	342.752	-0.39795	0.25049	0.026855	44.1243	20.311	0.8214	0.13857	-0.23613	0.04668
0.734	-2.279	18.9901	14.3811	-0.05605	0.011324	-0.05967	-18.8837	60.0493	81.99	-0.057617	0.033203	-0.018555	-62.491	196.237	269.697	-0.375	0.22363	0.038574	35.483	26.24277	-3.949	0.13759	-0.23467	0.035156
0.736	-38.2753	32.45	-4.9109	-0.0098602	0.05762	-0.0050722	-8.193	29.2094	71.3405	-0.036621	0.03418	-0.015625	-69.383	137.9017	289.557	-0.36279	0.20215	0.045899	52.763	14.0347	12.28	0.13174	-0.23154	0.027735
0.738	-32.4716	25.408	-7.0507	-0.025391	0.035645	-0.02832	-18.4695	49.5297	50.2186	-0.022461	0.039795	-0.013427	-50.884	180.723	250.285	-0.35645	0.1792	0.054199	49.512	43.9202	38.197	0.12705	-0.22285	0.019922
0.74	-2.016	15.3067	11.916	-0.02139	-0.010742	-0.066993	-41.73611	29.439	32.936	-0.012695	0.040527	-0.013672	-55.927	134.6611	215.729	-0.35596	0.15674	0.062988	41.405	27.96703	43.3837	0.11914	-0.21338	0.01416
0.742	5.035	13.4176	16.1727	0.040721	0.035937	-0.0021512	-8.9052	26.4727	45.683	0.00048828	0.040527	-0.00097656	-18.2797	170.592	184.466	-0.35938	0.14404	0.070801	-7.5141	21.8768	34.676	0.11269	-0.20019	0.011426
0.744	-36.256	15.0844	6.2392	0.034865	0.01016	-0.020503	-34.9641	48.894	23.9431	0.0048828	0.035156	-0.00097656	40.991	126.342845	200.6493	-0.36084	0.12744	0.078125	-22.6585	7.4789	18.236	0.10312	-0.1834	0.011328
0.746	3.997	13.0945	21.136	0.034959	-0.045118	-0.065723	-36.776	14.8155	21.8916	0.01416	0.034668	0.0053711	50.88075	181.694	178.7215	-0.36328	0.11744	0.085449	-44.5931	-9.51	-3.2	0.091406	-0.16426	0.013672
0.748	17.022	13.8555	42.968	0.087402	-0.017578	-0.010254	-22.7818	21.3772	5.35112	0.021484	0.03125	0.0078124	58.213	127.262	190.436	-0.36279	0.11182	0.091309	10.0591	12.7485	6.36069	0.074707	-0.14297	0.01748
0.75	8.291	16.5817	30.1639	0.098242	-0.039942	-0.038771	-51.511	31.525	3.4652	0.031738	0.023438	0.014648	45.9942	162.107	129.4614	-0.35791	0.11572	0.104	-14.723	-7.463	21.9723	0.057129	-0.12061	0.02002
0.752	1.997	16.679	6.467	0.11446	-0.073339	-0.06582	-14.111	19.8143	12.2902	0.032227	0.01416	0.022949	26.368	112.035	137.3144	-0.354	0.11621	0.10449	-47.246	0.991	17.996	0.038867	-0.10498	0.015918
0.754	25.599	14.9049	-7.3169	0.15	-0.044824	-0.031835	11.5939	46.282	11.7048	0.033691	0.0043945	0.025879	22.952	155.643	112.3654	-0.34229	0.12109	0.12158	-62.927	-10.9338	11.8327	0.023437	-0.082227	0.011426
0.756	29.4476	13.8642	1.2301	0.14492	-0.069531	-0.073828	-28.7402	8.22822	18.6394	0.031738	-0.0029297	0.037109	45.041	113.396	110.5708	-0.32446	0.12085	0.11694	-75.205	-4.86244	9.4691	0.013281	-0.06582	0.0098634
0.758	12.812	16.9149	11.1785	0.1626	-0.075195	-0.086914	31.8812	-4.3153	27.0762	0.028564	-0.0095213	0.050049	31.91	141.353	81.9068	-0.30908	0.12061	0.11768	-43.0735	-3.9193	9.681	0.0026367	-0.050391	0.0054687
0.76	27.9434	19.4567	4.9593	0.18359	-0.042285	-0.053907	15.7313	13.5737	-5.1215	0.032227	-0.018555	0.057617	16.8294	74.3947	59.183	-0.28027	0.12402	0.11865	-24.4969	-14.6464	23.407	-0.0029297	-0.040039	-0.0019531
0.762	16.706	13.5301	18.7195	0.15674	-0.066992	-0.10459	7.7978	-26.7838	13.2788	0.036621	-0.030762	0.067383	-6.946	63.69114	48.725	-0.26025	0.12061	0.11914	-8.6454	-26.589	-7.239	-0.0091796	-0.02959	-0.013965
0.764	34.0848	18.9093	40.2825	0.18759	-0.04043	-0.074121	57.92	12.5608	6.2084	0.033691	-0.039551	0.070313	-20.7459	21.6369	58.381	-0.22803	0.11279	0.1167	-36.386	-33.5197	-6.489384	-0.016504	-0.025293	-0.027246
0.766	18.609	10.5303	80.1715	0.17627	-0.041015	-0.069238	19.7571	0.7302	-21.5005	0.038086	-0.049316	0.080566	-18.4666	29.321	48.694	-0.19824	0.098386	0.11328	-9.8514	0.2634	-12.5202	-0.021191	-0.026074	-0.044433
0.768	11.248	1.3873	114.8747	0.13867	-0.087402	-0.125	47.303	-11.7699	-2.515	0.041992	-0.056885	0.087158	-0.893000000000001	24.7547	49.002	-0.17188	0.087402	0.104	-23.25	4.6894	10.6076	-0.024121	-0.028613	-0.062305
0.77	15.387	-0.00309999999999988	129.7568	0.18027	-0.037012	-0.060352	59.789	16.1822	-16.458	0.04834	-0.067383	0.097168	-6.24	18.5823	38.2004	-0.14502	0.071289	0.092773	20.8625	29.8514	5.525	-0.024902	-0.027344	-0.07959
0.772	14.788	13.7464	129.06355	0.13477	-0.074023	-0.104	25.2444	-19.7111	7.7199	0.054199	-0.080078	0.10352	-39.0621	4.7063	4.93669	-0.1333	0.06543	0.092773	39.528	6.2035	-12.52	-0.026563	-0.033496	-0.1001
0.774	29.488	15.7814	163.2961	0.14297	-0.078711	-0.098144	52.743	-6.2754	28.9956	0.054688	-0.084473	0.10498	-54.88108	4.6869	25.4129	-0.090332	0.036621	0.1001	16.378	7.1209	-39.469	-0.031152	-0.038379	-0.12276
0.776	48.117	-6.548	223.3352	0.15518	-0.053711	-0.061816	33.636	18.8837	-2.8332	0.057129	-0.10205	0.11279	-61.575	18.4847	-4.221	-0.048828	-0.0039063	0.11475	46.929	17.2075	0.593399999999999	-0.030371	-0.039551	-0.14307
0.778	75.114	-25.46	279.6446	0.10742	-0.11328	-0.13379	11.245	6.2859	2.3078	0.060547	-0.11157	0.11402	-66.4376	-11.6502	21.8669	-0.025391	-0.023926	0.12646	17.6397	23.533	9.0314	-0.036035	-0.042871	-0.15889
0.78	46.061	-44.5611	284.1805	0.13867	-0.074805	-0.085253	39.9783	26.94	-0.29859	0.064453	-0.12256	0.11279	-31.678	4.41467	33.9669	0.012207	-0.063477	0.12988	51.9	39.68439	-10.792	-0.038086	-0.040527	-0.17676
0.782	22.88	-39.633	310.8022	0.11387	-0.07334	-0.10488	6.3113	17.1368	-6.4142	0.070313	-0.13623	0.11035	-65.7822	-29.6034	27.4169	0.038818	-0.09253	0.12867	66.95	24.954	-23.1731	-0.044336	-0.042187	-0.19033
0.784	27.141	-40.5388	346.326	0.070508	-0.090137	-0.17168	22.3543	0.222	0.2084	0.071045	-0.14599	0.10889	-54.3198	-1.889	-12.89297	0.0625	-0.11719	0.13086	64.3458	19.9667	-27.416	-0.054981	-0.041211	-0.19853
0.786	19.6376	-26.5119	384.714	0.078516	-0.0028316	-0.12949	7.451	19.0355	-4.7145	0.069336	-0.15527	0.10645	-40.1979	-30.05	6.2418	0.10107	-0.14697	0.12256	29.6197	24.0646	24.077	-0.070215	-0.045898	-0.21338
0.788	14.6209	-3.9959	409.5689	-0.013184	0.026855	-0.18652	-37.613	3.193	-2.8514	0.067871	-0.17188	0.099121	-22.176	28.4318	-30.987	0.11523	-0.16211	0.11914	46.8237	19.278	65.64	-0.086621	-0.049121	-0.22802
0.79	-39.981	19.38832	433.639	-0.10312	0.068359	-0.23584	-7.827	-7.656	10.0243	0.072266	-0.17725	0.094727	-26.2007	-15.65061	-2.872	0.15527	-0.19385	0.10205	57.509	-4.83300000000001	115.165	-0.10889	-0.0625	-0.24707
0.792	-11.0632	28.0326	483.848	-0.15459	0.18135	-0.20137	-29.25829	12.73177	-13.93815	0.0625	-0.18604	0.087402	1.428	30.604	-20.886	0.17896	-0.219	0.08667	-2.8842	-28.231	111.0097	-0.13828	-0.070605	-0.26601
0.794	-35.533	25.951	522.658	-0.30498	0.21885	-0.26269	-50.72	-13.0971	-0.469100000000001	0.060546	-0.19092	0.080566	14.7142	-18.1685	-20.3944	0.20654	-0.24268	0.066406	31.534	-35.638	152.802	-0.1708	-0.067285	-0.28662
0.796	-42.9221	43.50909	567.701	-0.42549	0.27881	-0.28936	-3.1301	5.3968	-0.5813	0.055176	-0.19531	0.07666	39.4317	32.92	-12.7495	0.22217	-0.27539	0.031738	-2.805	-27.38588	194.523	-0.21377	-0.063379	-0.30811
0.798	-26.8523	50.05	602.3784	-0.49756	0.40869	-0.23828	-46.351	12.6331	3.8221	0.047363	-0.19824	0.070801	67.368	-9.2884	22.6817	0.22998	-0.29395	0.011719	20.02	-4.1169	216.7373	-0.27715	-0.04834	-0.31982
0.8	28.068	37.003	654.334	-0.65508	0.4625	-0.27588	-42.297	-6.7389	24.3517	0.040527	-0.19824	0.067871	30.781	51.857	-12.755	0.25049	-0.30615	-0.017578	54.506	5.985	268.3803	-0.36426	-0.020996	-0.3335
0.802	16.319	15.559	666.466	-0.78545	0.52315	-0.3085	-20.0619	19.7027	-1.9866	0.035645	-0.19336	0.063477	45.9407	3.33241	2.4589	0.27979	-0.30103	-0.034912	16.019	27.0208	326.362	-0.46103	0.022754	-0.33194
0.804	-33.8534	-2.932	667.1025	-0.8499	0.64307	-0.26396	-48.1042	-8.964	1.1212	0.027099	-0.18823	0.059082	65.4534	43.341	-5.4535	0.32715	-0.29932	-0.045898	-37.3736	37.62	462.21373	-0.56445	0.075683	-0.32461
0.806	-5.55	-20.636	688.033	-0.96229	0.71172	-0.28389	16.273	0.607	15.8766	0.019531	-0.18457	0.058594	65.861	2.46	4.2547	0.3916	-0.29883	-0.060059	-43.7267	36.391	602.379	-0.67695	0.12061	-0.31523
0.808	16.9273	-46.281	732.546	-1.0679	0.75049	-0.34229	-12.2224	32.084	-6.6359	0.014648	-0.17676	0.055664	68.3793	44.388	-2.2672	0.42432	-0.30029	-0.071289	-25.6841	54.9927	732.355	-0.79678	0.16348	-0.30068
0.81	30.9195	-70.208	772.0343	-1.0936	0.83047	-0.33086	-11.24582	2.95719	-3.240256	0.010254	-0.16309	0.054199	50.253	21.0662	3.372	0.45557	-0.28955	-0.09375	-47.5876	22.1364	821.2973	-0.93408	0.19141	-0.27881
0.812	-0.714000000000002	-102.1477	791.6509	-1.1282	0.90986	-0.33154	26.9015	17.12689	-4.8567	0.0039063	-0.15723	0.056152	24.024	32.0013	-6.9495	0.46435	-0.27075	-0.11792	6.752	-11.819	889.976	-1.1437	0.18554	-0.21865
0.814	-8.8586	-129.3177	808.963	-1.1865	0.93603	-0.39912	-7.1783	19.0628	-19.0623	-0.0021972	-0.14673	0.053467	14.1194	13.058	-3.0659	0.46143	-0.25	-0.14063	-21.42574	-100.9691	962.881	-1.4628	0.22685	-0.16885
0.816	-13.7568	-136.5121	849.607	-1.2002	0.98086	-0.41699	34.952	5.9131	8.419	-0.0073242	-0.13379	0.052734	30.98	19.8649	-3.0586	0.45459	-0.20801	-0.16406	-23.382	-171.532	987.021	-1.7936	0.42021	-0.18291
0.818	-25.0259	-123.1499	882.5568	-1.1836	1.0605	-0.40039	45.36627	19.9781	4.2316	-0.013672	-0.11328	0.047852	20.7698	31.6322	16.94203	0.45166	-0.18848	-0.17773	11.618	-189.001	1004.722	-2.0737	0.6333	-0.17969
0.82	-22.313	-118.5917	939.65	-1.2121	1.0785	-0.4375	9.166	10.3353	-7.49493	-0.01416	-0.10596	0.047363	26.585	37.823	22.3347	0.44629	-0.14795	-0.18799	10.5884	-192.937	972.797	-2.3613	0.81934	-0.13428
0.822	-17.783	-106.5805	958.2305	-1.2234	1.0848	-0.46748	49.6701	8.2028	8.4731	-0.018555	-0.085449	0.044922	-16.0829	48.839	23.1684	0.44141	-0.12377	-0.18823	18.488	-214.987	957.9429	-2.6552	1.0132	-0.086035
0.824	18.15	-120.808	969.892	-1.1941	1.1165	-0.45459	39.228	32.8584	-5.5725	-0.018554	-0.067627	0.047851	-50.4566	36.108	29.338	0.4375	-0.10254	-0.18604	-0.442	-208.165	968.0267	-2.9097	1.1974	-0.06836
0.826	10.676	-122.022	978.3952	-1.1889	1.1244	-0.44766	15.2735	1.1967	15.6943	-0.019531	-0.056152	0.050781	-47.2966	34.131	9.5512	0.4165	-0.067383	-0.19092	-39.006	-186.711	984.577	-3.0257	1.3439	-0.075781
0.828	7.298	-99.8919	1014.3905	-1.209	1.0898	-0.47949	67.918	-1.1034	19.7438	-0.010742	-0.039551	0.04834	-63.90196	8.6162	26.773	0.4043	-0.054199	-0.18945	-39.437	-200.329	1055.032	-2.9515	1.4364	-0.12393
0.83	9.739	-72.11	1060.0218	-1.202	1.0704	-0.46767	21.9677	-0.7762	-6.52153	-0.0097656	-0.031738	0.042969	-44.1497	27.397	21.3236	0.36572	-0.026367	-0.17285	-38.747	-194.315	1115.405	-2.7183	1.4673	-0.20459
0.832	22.78	-56.751	1056.74603	-1.1737	1.07	-0.42324	29.3713	-20.3015	9.6127	0.0063477	-0.024414	0.034668	-51.5813	-10.2989	32.523	0.33399	-0.003418	-0.16773	-83.214	-222.826	1165.744	-2.3825	1.446	-0.31191
0.834	23.171	-80.722	1059.41809	-1.1796	1.0204	-0.43379	36.2452	13.1325	4.68798	0.019775	-0.020508	0.032227	-47.6099	33.062	30.2012	0.30469	0.018555	-0.16162	-62.809	-199.695	1158.4812	-2.041	1.3887	-0.41289
0.836	-7.892	-79.415	1077.0023	-1.1703	0.94863	-0.45293	-2.5155	17.397	-5.2584	0.036621	-0.01709	0.019043	-91.315	-20.6847	24.4	0.25	0.047852	-0.14941	-2.6463	-144.947	1137.7915	-1.7742	1.293	-0.48985
0.838	17.758	-70.9683	1121.6732	-1.1211	0.91016	-0.42236	29.1688	8.4605	16.0514	0.056641	-0.020996	0.0043945	-47.5932	13.6375	4.6643	0.21729	0.068359	-0.14258	4.023	-95.27	1171.5121	-1.6041	1.1549	-0.54219
0.84	27.496	-61.4693	1156.72579	-1.0914	0.85918	-0.41797	-2.0675	14.436	-4.1334	0.067383	-0.022949	-0.0053711	-12.433	-30.6832	28.928	0.15918	0.10889	-0.12891	11.2374	-36.75	1174.409	-1.5151	0.98193	-0.57275
0.842	-5.081	-58.374	1175.603	-1.0933	0.78867	-0.46856	-40.994	-11.1659	-0.85006	0.087402	-0.025879	-0.019531	1.112	15.3563	-19.9553	0.12061	0.14063	-0.11719	-13.502	-87.808	1218.308	-1.4824	0.79121	-0.57129
0.844	-19.078	-72.57334	1194.0085	-1.0653	0.75742	-0.48496	6.157	10.7343	9.284	0.095705	-0.029297	-0.035645	-4.44	-30.04342	27.944	0.088379	0.17285	-0.1123	13.024	-146.575	1232.955	-1.4812	0.60381	-0.54561
0.846	3.421	-89.082	1233.698	-1.0369	0.78301	-0.47315	-37.3441	19.3388	12.55695	0.10742	-0.029297	-0.050781	-2.778	22.82114	8.9311	0.046387	0.21484	-0.098145	-34.26	-197.488	1281.89228	-1.5241	0.43506	-0.51592
0.848	42.162	-91.794	1268.713	-1.0737	0.77783	-0.5249	-29.1905	12.1098	8.3397	0.11426	-0.029785	-0.066406	-1.0371	-23.063	22.20739	0.033691	0.23145	-0.094727	-51.845	-221.013	1368.141	-1.5983	0.29932	-0.46308
0.85	38.054	-73.119	1293.471	-1.1311	0.77744	-0.57529	-6.1715	22.582	1.04222	0.11572	-0.030762	-0.081055	26.04	22.8864	6.8641	0.0039063	0.26758	-0.084473	-79.784	-217.001	1423.278	-1.7144	0.22998	-0.40625
0.852	57.356	-66.777	1310.703	-1.1617	0.84659	-0.56846	-52.02	-0.42	-9.0356	0.12109	-0.033203	-0.10107	33.4213	-31.326	19.6044	-0.010742	0.28833	-0.078369	-121.862	-226.152	1419.649	-1.8784	0.23907	-0.35752
0.854	49.7339	-61.165	1318.574	-1.2261	0.9126	-0.57041	-17.4418	-11.321	3.70918	0.11621	-0.030517	-0.11328	35.375	23.3885	-29.0174	-0.025391	0.31445	-0.079102	-117.272	-277.866	1396.571	-2.0597	0.30459	-0.31758
0.856	30.071	-72.8849	1308.976	-1.3152	0.94141	-0.59844	-21.743	14.5257	-8.4015	0.11475	-0.027832	-0.12891	54.06	-7.755	0.351299999999999	-0.036621	0.33643	-0.071289	-120.684	-266.961	1390.956	-2.2378	0.40381	-0.30078
0.858	40.367	-72.442	1306.74978	-1.3813	0.98877	-0.60498	-21.5005	-5.544	-0.949	0.11084	-0.022949	-0.1582	56.5798	31.2897	-16.9599	-0.041504	0.34717	-0.067871	-54.935	-220.71	1454.339	-2.3929	0.52236	-0.29756
0.86	57.496	-62.2841	1313.6398	-1.4242	1.0609	-0.58164	-5.084	10.1406	12.121	0.10205	-0.022949	-0.1582	60.086	-0.4282	-15.8884	-0.053223	0.37061	-0.060547	-31.677	-164.935	1527.491	-2.5181	0.65674	-0.30811
0.862	53.584	-40.7014	1336.338	-1.4612	1.1044	-0.5833	-15.7031	-0.595	28.0447	0.081543	-0.026367	-0.19678	45.159	12.0675	-17.602	-0.063232	0.37744	-0.053711	26.9697	-88.918	1535.125	-2.5826	0.79434	-0.34063
0.864	22.603	-29.8926	1335.297	-1.4991	1.1298	-0.60557	4.8666	-64.727	61.2313	0.0542	-0.02124	-0.22192	45.6905	-13.6462	-9.113	-0.067871	0.38525	-0.047852	31.886	-71.114	1482.632	-2.603	0.93565	-0.37529
0.866	14.452	-26.86922	1335.8742	-1.5395	1.1625	-0.61758	3.938	-49.493	70.49852	0.022949	-0.0087891	-0.24561	42.923	23.8051	-20.1881	-0.078125	0.39111	-0.043457	66.9792	-59.443	1449.062	-2.5862	1.0689	-0.42568
0.868	17.343	-27.4456	1335.5635	-1.5859	1.209	-0.63184	-9.6583	-52.8924	88.5238	-0.03418	0.015625	-0.26074	46.872	36.6756	-0.5685	-0.083008	0.38623	-0.032227	74.38138	-57.453	1433.856	-2.5321	1.1804	-0.49033
0.87	32.551	-18.6645	1366.2928	-1.6485	1.278	-0.64619	29.0491	-56.2642	141.4558684	-0.075195	0.030273	-0.27197	34.586	47.4771	1.8747	-0.094238	0.38379	-0.021484	52.2942	-69.128	1439.968	-2.4604	1.2622	-0.55029
0.872	40.452	-18.6249	1360.9483	-1.7086	1.3473	-0.65664	24.5409	-15.64	164.8899	-0.16943	0.056641	-0.27783	-3.471	37.9409	21.839	-0.10449	0.3728	-0.022705	27.0046	-32.835	1449.154	-2.3714	1.3024	-0.60889
0.874	37.021	-9.279	1355.565	-1.7777	1.4109	-0.67813	45.038	-37.79689	201.684	-0.2461	0.076905	-0.28637	-7.255	-8.266	53.20835	-0.11133	0.35449	-0.022949	5.261	-59.211	1453.327	-2.2859	1.3183	-0.64922
0.876	28.34	-3.041	1347.5804	-1.8418	1.4705	-0.70664	93.791	-22.9779	241.381	-0.33154	0.098633	-0.28271	-18.9865	-25.852	47.5799	-0.12451	0.31836	-0.043945	19.3513	-59.02	1427.126	-2.2144	1.307	-0.66601
0.878	43.4034	-1.819	1355.437	-1.8979	1.5239	-0.73193	51.0636	16.2481	288.986	-0.41797	0.12402	-0.2749	-35.213	-41.535	48.5148	-0.12744	0.30664	-0.055176	54.585	-62.313	1427.132	-2.1572	1.2736	-0.66484
0.88	41.124	-22.6658	1368.655	-1.9467	1.5686	-0.76817	58.457	32.613	381.7046	-0.46387	0.13184	-0.27051	-28.5458	-19.914	94.8393	-0.14355	0.27393	-0.061523	85.847	-41.082	1419.353	-2.1187	1.2251	-0.65381
0.882	33.978	-28.931	1359.105	-1.9874	1.5986	-0.79521	61.335	95.4775	430.9666	-0.58154	0.14307	-0.26611	-65.3514	-55.225	136.736	-0.1565	0.25805	-0.073242	70.1034	-6.2966	1462.043	-2.1069	1.1553	-0.63652
0.884	50.071	-28.318	1365.517	-2.0136	1.6271	-0.81905	-7.6332	122.388	486.7351	-0.70264	0.18457	-0.25684	-35.3957	-44.339	152.2835	-0.17285	0.24316	-0.087402	94.944	-1.696	1484.342	-2.1031	1.0769	-0.61934
0.886	51.392	-29.1303	1359.381	-2.0285	1.6439	-0.84092	36.539	98.1639	548.513	-0.82568	0.22803	-0.25439	-59.876	-118.516	197.3476	-0.20459	0.22656	-0.10596	80.466	-6.4428	1468.819	-2.0996	1.0055	-0.59082
0.888	20.036	-18.8451	1358.714	-2.0288	1.645	-0.8501	1.0825	106.86	599.9176	-1.0039	0.2749	-0.2373	-81.785	-81.802	231.1823	-0.22852	0.21826	-0.1123	72.817	-12.0881	1467.3064	-2.0846	0.93438	-0.56094
0.89	10.508	-6.8749	1344.5643	-2.0114	1.6347	-0.85909	-46.812	66.131	669.96464	-1.0991	0.31543	-0.2207	-89.335	-98.5616	324.713	-0.27832	0.21436	-0.12646	94.56	-3.923	1432.414	-2.0718	0.87354	-0.53662
0.892	49.798	-0.0899000000000001	1343.1195	-1.9812	1.6164	-0.86719	24.5836	49.544	724.6804	-1.2871	0.38086	-0.18408	-56.88	3.082	392.358	-0.32886	0.21216	-0.13623	44.136	-3.968	1408.812	-2.0493	0.82568	-0.51045
0.894	68.332	6.065	1345.2777	-1.9375	1.5852	-0.87188	-2.243	38.5521	741.1434	-1.4477	0.43212	-0.14551	-74.84	18.7639	504.77	-0.38525	0.2124	-0.146	6.385	48.43	1395.3249	-2.023	0.78438	-0.48486
0.896	38.832	29.0693	1345.302	-1.8848	1.5445	-0.87187	-5.9294	-35.138	783.58058	-1.6323	0.50049	-0.11523	-63.701	59.1871	554.504	-0.47754	0.21289	-0.16699	-22.353	80.196	1377.714	-1.9887	0.75782	-0.46181
0.898	43.817	48.4037	1331.7565	-1.8262	1.502	-0.85938	43.3976	-79.3233	803.3391	-1.8691	0.61621	-0.066406	-103.857	-9.548	680.1231	-0.53076	0.21338	-0.1792	-20.5152	113.818	1368.76	-1.9462	0.7417	-0.44092
0.9	65.8814	69.58	1318.7407	-1.7604	1.4604	-0.85371	-0.760999999999999	-117.473	807.1179	-1.9902	0.66797	-0.044922	-120.007	17.9022	744.0585	-0.66748	0.22119	-0.1958	-24.1947	119.8693	1340.048	-1.8979	0.72705	-0.42236
0.902	68.673	69.816	1303.384	-1.6914	1.4244	-0.83935	17.83	-146.8277	827.409	-2.2612	0.79639	-0.023438	-82.106	-15.8943	836.061	-0.80151	0.22974	-0.2063	-31.1275	115.37	1334.561	-1.8459	0.71543	-0.4084
0.904	43.119	63.063	1284.6016	-1.6364	1.3717	-0.84131	3.3557	-98.73431	822.0048	-2.4195	0.9209	-0.061768	-38.204	20.52	894.578	-0.95654	0.25732	-0.21045	-22.7379	137.24	1288.879	-1.7878	0.70517	-0.39639
0.906	55.011	44.572	1278.9298	-1.5934	1.3129	-0.85273	-41.7561	-114.487	855.192	-2.4956	1.0347	-0.098145	7.8865	-32.075	932.139	-1.1851	0.31006	-0.20557	-62.465	130.767	1248.906	-1.73	0.68955	-0.38506
0.908	74.7416	36.01705	1260.356	-1.5342	1.3008	-0.82031	-25.2545	-119.474	884.733	-2.3882	1.1108	-0.10889	23.998	-36.833	880.354	-1.3042	0.34229	-0.19727	-66.189	154.001	1181.8979	-1.6704	0.671	-0.37373
0.91	60.156	37.92373	1247.25491	-1.531	1.2593	-0.83955	-62.01	-115.444	895.522	-2.2729	1.1118	-0.10205	42.2014	-102.614	859.84743	-1.5542	0.43799	-0.15137	-27.1045	140.119	1175.1917	-1.6172	0.65332	-0.35547
0.912	47.71	34.6054	1252.8476	-1.5348	1.2031	-0.86992	-51.657	-156.329	929.971	-1.998	1.0547	-0.12988	64.049	-124.298	850.527	-1.7478	0.52368	-0.094972	-25.9921	134.456	1179.9171	-1.5642	0.62871	-0.33496
0.914	36.006	24.907	1248.2424	-1.5067	1.2359	-0.81836	-31.658	-139.401	965.0155	-1.8098	0.9807	-0.17749	82.8712	-144.57	886.452	-1.9453	0.61523	-0.033203	-21.6597	134.451	1186.765	-1.5155	0.60986	-0.31748
0.916	39.203	36.759	1226.4592	-1.54	1.2099	-0.8291	-74.684	-129.264	981.9327	-1.6499	0.90088	-0.22705	91.6967	-153.166	938.017	-2.1948	0.73291	0.030762	-27.4795	147.133	1188.743	-1.4691	0.58994	-0.29405
0.918	36.59	39.324	1182.5568	-1.5781	1.1523	-0.85938	-17.6151	-141.923	1025.4004	-1.5151	0.7915	-0.28662	94.909	-170.106	959.5115	-2.3309	0.82398	0.064942	-21.2735	171.94647	1123.063	-1.4219	0.5711	-0.2707
0.92	43.613	56.7867	1159.5872	-1.5519	1.1935	-0.77685	4.931	-125.955	1006.815	-1.4824	0.7334	-0.31689	99.8585	-221.829	962.554	-2.4019	0.91553	0.083496	-0.1636	200.781	1082.126	-1.375	0.55762	-0.24414
0.922	52.583	63.732	1160.654	-1.5777	1.187	-0.76299	-16.9696	-157.093	1045.702	-1.4487	0.62549	-0.35938	33.6763	-239.609	971.1322	-2.3901	1.022	0.074219	12.1111	206.497	1051.9745	-1.322	0.54834	-0.22373
0.924	57.885	71.15	1141.886	-1.5999	1.1194	-0.7915	39.656	-173.338	1108.219	-1.4648	0.5332	-0.37402	25.157	-263.083	1003.425	-2.3516	1.0684	0.063965	8.988	162.476	1025.872	-1.2746	0.53936	-0.19629
0.926	38.043	63.739	1112.6253	-1.5406	1.1562	-0.71328	7.974	-155.096	1127.394	-1.4897	0.50342	-0.37256	33.585	-193.288	1023.11	-2.228	1.1353	0.013184	18.1046	140.21	975.536	-1.2257	0.53506	-0.1709
0.928	21.531	73.044	1097.2825	-1.5156	1.1777	-0.68457	15.5281	-183.8701	1191.4618	-1.5781	0.46484	-0.35449	46.9678	-193.565	1093.087	-2.117	1.1462	-0.023438	16.6804	129.332	919.71897	-1.1712	0.53213	-0.15029
0.93	26.243	84.76	1083.54267	-1.5045	1.1099	-0.71816	24.703	-184.649	1250.527	-1.6814	0.46655	-0.333	39.3731	-150.299	1088.05	-2.0093	1.1333	-0.062012	22.3828	185.0343	854.477	-1.1187	0.53027	-0.13477
0.932	21.899	103.383	1048.244	-1.444	1.12	-0.6833	-14.2252	-179.97	1279.03	-1.8022	0.4917	-0.30225	36.3012	-209.7055	1128.5126	-1.8765	1.0679	-0.10889	56.275	232.468	817.057	-1.0648	0.5293	-0.11602
0.934	32.429	102.6858	1021.459	-1.4175	1.095	-0.69502	6.0103	-226.637	1338.78	-1.9785	0.56934	-0.25098	56.139	-193.2582	1154.053	-1.8223	1.0234	-0.12549	32.7833	280.6	773.451	-1.0102	0.53008	-0.10449
0.936	10.199	112.362	1007.9376	-1.3923	1.053	-0.7207	-5.11878	-186.121	1350.923	-2.062	0.61377	-0.23096	11.351	-251.71102	1245.259	-1.7598	0.92383	-0.15137	43.648	311.91	734.518	-0.94922	0.53086	-0.094336
0.938	-3.755	104.6175	991.4917	-1.3198	1.0845	-0.65967	-50.173	-177.087	1349.084	-2.2363	0.71484	-0.19336	-23.642	-189.314	1274.3	-1.7557	0.84888	-0.1648	61.008	283.458	721.7586	-0.88994	0.53076	-0.082715
0.94	2.151	94.2028	974.672	-1.2969	1.0796	-0.65205	12.2272	-181.288	1389.326	-2.3298	0.79175	-0.16259	-56.236	-235.356	1346.145	-1.7808	0.78271	-0.18018	66.948	268.736	691.605	-0.82666	0.53174	-0.070801
0.942	10.509	106.691	941.9563	-1.2973	1.0172	-0.68203	8.085	-127.231	1410.684	-2.4219	0.85352	-0.1416	-79.924	-207.66	1343.335	-1.8887	0.72656	-0.19531	7.2008	254.648	666.07537	-0.76211	0.53477	-0.061719
0.944	24.017	96.3075	929.66902	-1.2394	1.0406	-0.6125	26.31706	-151.2787	1417.1919	-2.582	0.96484	-0.17676	-51.031	-251.902	1423.166	-1.9585	0.71533	-0.20361	-13.244	246.727	638.298	-0.69688	0.53242	-0.054883
0.946	17.411	111.766	921.768	-1.2272	1.0336	-0.59473	71.802	-148.6553	1445.494	-2.6543	1.04	-0.20508	-41.6204	-202.4198	1426.6722	-2.1309	0.72266	-0.21045	-33.292	234.7632	570.724	-0.63476	0.52969	-0.047461
0.948	29.592	113.613	898.6861	-1.2397	0.97314	-0.61279	16.2524	-106.904	1408.893	-2.7715	1.1777	-0.25635	-51.538	-177.2992	1483.7157	-2.2625	0.75708	-0.21362	-63.636	213.627	513.496	-0.57139	0.5251	-0.039258
0.95	16.555	117.036	874.593	-1.1974	0.99689	-0.54688	33.138	-111.256	1433.592	-2.8261	1.2778	-0.30273	-54.774	-121.799	1480.9362	-2.4004	0.80371	-0.22266	-54.116	204.3508	462.917	-0.51807	0.51611	-0.03418
0.952	20.265	111.23	854.297	-1.1921	0.98564	-0.52608	38.83581	-40.68	1447.317	-2.8452	1.3579	-0.34619	-54.228	-134.529	1503.226	-2.5605	0.89844	-0.24854	-51.816	206.934	429.4596	-0.46855	0.5125	-0.032324
0.954	20.223	102.1858	841.2164908	-1.2073	0.92197	-0.54131	8.563	-34.815	1440.2224	-2.8223	1.4121	-0.40381	-32.283	-119.783	1482.783	-2.6191	0.95703	-0.24707	-88.665	224.548	415.397	-0.42705	0.50498	-0.026172
0.956	18.325	112.629	820.693	-1.1591	0.93233	-0.48145	30.871	-67.9104	1478.88672	-2.7905	1.4341	-0.43457	16.0503	-141.7353	1524.274	-2.7397	1.0845	-0.27441	-106.752	198.72	416.4139	-0.39111	0.49912	-0.027734
0.958	15.594	115.102	800.488	-1.1426	0.91602	-0.45898	-8.126	-52.887	1509.264	-2.7109	1.4414	-0.48633	35.389	-126.227	1549.13	-2.8113	1.1858	-0.29492	-76.323	175.84	400.659	-0.35957	0.48828	-0.030566
0.96	2.957	109.1525	770.849	-1.1335	0.8544	-0.47109	-19.3723	-99.946	1527.8078	-2.6345	1.4183	-0.51001	10.8879	-107.3179	1572.53	-2.8765	1.2817	-0.33057	-69.948	145.3434	361.66	-0.33252	0.47852	-0.030762
0.962	0.374000000000002	119.3344	744.412	-1.0843	0.84766	-0.42012	6.347	-96.309	1546.632	-2.5581	1.3813	-0.53662	-12.877	-96.486	1523.7614	-2.9507	1.4106	-0.36572	-41.928	156.215	328.319	-0.31221	0.4668	-0.024024
0.964	15.239	124.1339	704.1794	-1.059	0.82617	-0.40254	-5.987	-53.9684	1511.8412	-2.4707	1.3164	-0.56641	-16.153	-78.855	1534.614	-2.9722	1.4673	-0.37744	-40.493	161.814	275.443	-0.29688	0.45859	-0.022363
0.966	25.501	118.98996	705.1832	-1.0368	0.77823	-0.40772	33.8549	-111.876	1513.7423	-2.4297	1.2754	-0.57129	-5.776	-83.516	1544.1648	-2.9722	1.5493	-0.39502	-90.978	147.5562	257.1537	-0.28789	0.45195	-0.018457
0.968	9.082	124.6698	673.0623	-0.97998	0.77197	-0.36084	59.762	-88.7474	1510.5597	-2.3516	1.1855	-0.57813	30.2071	-78.436	1563.1983	-2.9499	1.5813	-0.40943	-116.077	167.3954	216.6987	-0.28516	0.4499	-0.012012
0.97	1.832	133.852	637.95906	-0.95312	0.75097	-0.36152	27.61	-74.779	1476.6428	-2.3054	1.1096	-0.57813	26.2618	-109.891	1604.748	-2.9194	1.5981	-0.42188	-84.674	140.093	188.1891	-0.29004	0.44189	-0.010254
0.972	20.0735	140.117	611.9242	-0.92998	0.70479	-0.3667	70.328	-119.239	1524.6703	-2.2671	1.0396	-0.57471	8.1855	-83.36	1567.475	-2.8511	1.5923	-0.42139	-70.777	137.1682	149.063	-0.30244	0.44287	-0.00068364
0.974	5.585	123.262	614.7734	-0.87803	0.72159	-0.32803	26.2084	-47.021	1517.1348	-2.2358	0.95947	-0.56592	-12.6205	-95.729	1578.617	-2.8242	1.5742	-0.41797	-22.0299	115.158	120.956	-0.31162	0.43955	0.010059
0.976	-0.0429999999999993	119.352	601.4949	-0.85224	0.70518	-0.32764	-4.8436	-55.4897	1519.684	-2.23	0.92822	-0.56201	14.8336	-53.2379	1530.067	-2.7646	1.5371	-0.4082	2.9987	92.869	113.5411	-0.32022	0.43448	0.015918
0.978	-19.2279	128.921	569.4299	-0.83008	0.66504	-0.33984	49.745	-47.029	1531.9134	-2.2202	0.88232	-0.55029	33.068	-68.2545	1537.475	-2.7273	1.4954	-0.40015	-23.3912	60.928	81.8989	-0.32969	0.43106	0.027832
0.98	8.675	129.535	534.1216	-0.77949	0.68301	-0.30078	5.174	33.9723	1483.5369	-2.2158	0.8545	-0.5437	49.0994	-32.6316	1478.875	-2.6895	1.4531	-0.39063	0.2728	53.915	70.62341	-0.33398	0.42871	0.033203
0.982	-17.844	127.309	517.286	-0.76172	0.66465	-0.30586	20.451	18.816	1471.364	-2.2085	0.84424	-0.53369	-9.388	-53.382	1523.776	-2.646	1.3892	-0.37158	57.086	63.3277	38.908	-0.33682	0.41885	0.042285
0.984	-12.561	112.0426	501.248	-0.73672	0.63691	-0.30351	27.452	63.0705	1456.586	-2.2012	0.83398	-0.52539	-23.9863	11.88531	1474.852	-2.6226	1.354	-0.36328	73.176	46.7261	35.485	-0.3291	0.40576	0.050684
0.986	-16.6922	117.7373	471.99	-0.69726	0.64082	-0.26621	-1.741	82.586	1436.148	-2.1948	0.83447	-0.52295	-19.63165	15.7595	1508.179	-2.5801	1.2891	-0.33936	83.33	45.281	33.661	-0.32793	0.39483	0.056543
0.988	-16.739	117.797	455.732	-0.68359	0.61621	-0.26904	42.3031	10.37965	1476.8766	-2.1772	0.84229	-0.51904	-34.44479	73.053	1460.442	-2.545	1.2495	-0.32593	76.361	38.931	29.5011	-0.31621	0.37754	0.064746
0.99	-32.2593	106.8164	440.3394	-0.65634	0.58818	-0.26104	30.8506	37.081	1458.632	-2.1578	0.85596	-0.51563	-37.017	37.647	1464.158	-2.5039	1.2129	-0.31445	42.2394	52.1313	0.7528	-0.30762	0.35352	0.07373
0.992	-3.805	91.98167	428.395	-0.61709	0.58349	-0.22519	42.1861	-4.846	1408.8698	-2.1387	0.86719	-0.5127	-64.093	78.069	1400.824	-2.4453	1.1777	-0.29297	37.238	45.4807	17.2276	-0.28818	0.33135	0.076465
0.994	-9.742	82.8085	400.5258	-0.60029	0.55654	-0.22715	98.515	-15.19806	1406.5848	-2.1094	0.88574	-0.50439	-50.898	48.9193	1417.039	-2.4077	1.1626	-0.28906	59.963	25.6725	30.922	-0.26992	0.30606	0.07793
0.996	-35.65388	105.167	372.2888	-0.57236	0.52021	-0.22383	48.4772	46.543	1363.369	-2.0918	0.88867	-0.50293	-64.4663	95.838	1369.697	-2.3276	1.1333	-0.2749	44.548	-5.5218	0.640999999999998	-0.24805	0.27363	0.092774
0.998	-13.2681	108.209	360.278	-0.53418	0.51855	-0.18896	28.572	8.9232	1360.262	-2.0425	0.91064	-0.4917	-65.115	95.216	1397.6817	-2.2642	1.1132	-0.26391	16.4288	-28.563	-14.3583	-0.22197	0.23526	0.097072
1	-0.606000000000002	112.29	345.864	-0.51387	0.48359	-0.18828	40.2775	25.1304	1369.247	-2.0024	0.91503	-0.48169	-66.711	128.235	1354.673	-2.1948	1.0913	-0.25439	24.991	1.0972	-32.6906	-0.19727	0.18945	0.11035
1.002	-23.0749	104.89	327.2872	-0.48769	0.44434	-0.19199	3.108	36.0055	1334.174	-1.9526	0.91504	-0.47119	-42.754	91.18	1346.12008	-2.105	1.0493	-0.2417	-10.708	17.475327	-1.002	-0.18086	0.14639	0.12305
1.004	-37.7764	93.0247	304.961	-0.44043	0.44629	-0.15879	30.6026	-24.499	1337.804	-1.8848	0.91211	-0.45654	-52.1043	122.434	1321.3163	-2.0586	1.0313	-0.24023	12.8071	46.9774	15.3841	-0.16601	0.097458	0.13516
1.006	12.828	94.4739	296.4805	-0.41944	0.4167	-0.15938	23.1342	43.549	1316.158	-1.8438	0.90723	-0.45215	-22.984	97.944	1332.117	-1.9546	0.979	-0.22803	-18.8761	36.6059	6.3766	-0.15898	0.047071	0.14727
1.008	9.91	90.7949	293.643	-0.39404	0.37646	-0.1626	-13.6347	44.5924	1250.799	-1.7612	0.89307	-0.43311	-36.458	137.319	1319.258	-1.8807	0.92896	-0.22632	-33.1158	18.24	-2.0695	-0.15459	0.0001952	0.16035
1.01	-20.2774	88.36	279.9766	-0.34951	0.37373	-0.1332	23.6462	54.10998	1212.2497	-1.6963	0.87696	-0.41919	-14.91805	143.1705	1319.892	-1.8086	0.87695	-0.22559	-22.1652	11.583	27.001	-0.14404	-0.045898	0.18311
1.012	-1.637	78.1832	269.3421	-0.3289	0.34561	-0.13233	2.586	115.859	1166.1412	-1.6362	0.86377	-0.40088	-18.295	141.434	1280.098	-1.7144	0.81494	-0.21973	-48.8293	3.51	48.072	-0.13896	-0.089843	0.20693
1.014	-16.122	67.8568	249.0001	-0.30821	0.30381	-0.13897	8.23	55.348	1126.629	-1.5542	0.84229	-0.37402	-15.4495	130.301	1221.116	-1.6675	0.78369	-0.22021	-34.852	32.0589	31.4037	-0.14199	-0.12002	0.22061
1.016	-2.548	81.822	209.5052	-0.2668	0.29678	-0.1083	40.8736	86.771	1124.2596	-1.5195	0.82813	-0.3623	-4.994	120.919	1195.843	-1.5737	0.71338	-0.21826	-50.5063	9.7672	10.3164	-0.14433	-0.13721	0.23115
1.018	7.504	72.578	195.631562	-0.24658	0.27246	-0.097656	29.0365	104.59	1077.0047	-1.4453	0.8125	-0.33545	12.7208	150.1685	1166.145	-1.5112	0.66748	-0.21216	-45.663	-1.9481	-4.79272	-0.14375	-0.15127	0.23916
1.02	2.404	68.7478	206.513	-0.23662	0.23203	-0.10518	26.9044	55.057	1059.1983	-1.3923	0.79272	-0.31543	48.031	177.761	1166.837	-1.4512	0.62109	-0.20801	-73.537	-32.578	-4.927	-0.13818	-0.16602	0.24121
1.022	-7.701	70.33283	196.677	-0.2002	0.22578	-0.083398	-3.5988	131.88	1027.6274	-1.3413	0.77881	-0.29248	51.955	199.271	1119.8724	-1.3765	0.56494	-0.19385	-57.489	-19.3493	16.929	-0.12461	-0.17803	0.24531
1.024	-11.089	71.9431	171.7701	-0.1791	0.21914	-0.056836	-32.546	93.50851	979.3492	-1.2754	0.75488	-0.27441	39.5268	171.54	1081.0744	-1.3374	0.54346	-0.18799	-29.1759	7.546	15.893996	-0.10186	-0.19346	0.24727
1.026	20.26445	77.786	159.3618	-0.18574	0.18916	-0.073633	9.702	76.018	974.9959	-1.2378	0.74463	-0.25879	32.9289	171.046	1037.0185	-1.269	0.50049	-0.17969	-12.7887	5.41856	23.0316	-0.064746	-0.21104	0.24883
1.028	-13.4853	62.9113	173.3302	-0.16895	0.15869	-0.07666	-23.0652	136.905	937.375	-1.1909	0.71924	-0.24609	78.5223	158.4335	1030.889	-1.2216	0.47119	-0.1709	-12.3516	0.8541	19.7	-0.018848	-0.22637	0.24404
1.03	3.555	59.30819	174.7592	-0.12696	0.16641	-0.025098	-22.2972	62.212	906.9322	-1.1501	0.70727	-0.22607	63.9878	211.765	976.5097	-1.1792	0.44678	-0.15967	-24.4134	-39.477	11.123	0.026855	-0.23877	0.23193
1.032	-2.781	63.7591	129.3854	-0.13349	0.1415	-0.039941	2.5302	114.866	890.849	-1.1055	0.68945	-0.21191	57.9783	187.1362	965.067	-1.1152	0.41895	-0.14893	40.1912	-15.5326	-4.774	0.080664	-0.24688	0.21758
1.034	0.594999999999999	68.045	108.8383	-0.13115	0.10127	-0.048144	-27.2152	144.435	848.9038	-1.0522	0.66846	-0.17822	23.556	213.936	881.5028	-1.0835	0.40576	-0.14746	43.4578	-17.4312	-5.5409	0.14326	-0.25537	0.20303
1.036	-13.5027	75.461	117.373	-0.088086	0.092969	-0.021289	21.47	88.317	830.127	-1.0244	0.65186	-0.16943	10.529	158.727	874.8405	-1.021	0.37842	-0.13428	94.599	17.76678	3.826	0.20693	-0.25459	0.18818
1.038	-23.7394	53.93	100.5859	-0.066406	0.095703	0.0063477	8.0549	152.068	794.5281	-0.97852	0.625	-0.14648	11.329	182.813	793.748	-0.97314	0.35913	-0.12842	74.853	17.7269	-21.771	0.26797	-0.2626	0.17002
1.04	-22.7747	43.8506	75.7829	-0.070996	0.060547	-0.016113	-5.1725	123.7187	758.5853	-0.94702	0.60669	-0.13745	42.6874	159.912	770.304	-0.92188	0.33594	-0.11572	32.13	11.9694	-14.0922	0.31982	-0.26758	0.15137
1.042	-18.89	53.337	66.308	-0.057617	0.031348	-0.023047	36.3713	118.337	741.43	-0.91357	0.58838	-0.13135	4.576	202.276	715.974	-0.85547	0.29688	-0.11035	43.798	18.0018	-25.273	0.36533	-0.26279	0.13486
1.044	-1.611	45.3961	95.1384	-0.012305	0.047364	0.014453	4.2089	188.861	691.841	-0.87451	0.56885	-0.12451	17.813	179.8184	713.604	-0.82422	0.28467	-0.10742	54.5221	21.44	2.3194	0.40429	-0.25156	0.11709
1.046	-5.792	40.3256	85.8219	-0.0083983	0.041406	0.012012	-4.653	128.692	668.0544	-0.84961	0.56152	-0.11475	-1.079	212.789	646.0462	-0.75586	0.24854	-0.10059	45.276	40.5464	16.595	0.44062	-0.2457	0.094042
1.048	-1.731	42.824	82.1208	-0.011719	0.017578	0	-6.0608	166.4524	616.998	-0.7998	0.5332	-0.10498	9.881	186.453	622.501	-0.69995	0.2207	-0.10156	48.997	23.0257	9.248	0.4666	-0.22842	0.071484
1.05	-21.416	49.618	68.40587	0.0070312	0.0091795	-0.01084	-41.162	190.421	584.3238	-0.76147	0.51098	-0.092041	-11.29	218.002	563.676	-0.65039	0.19385	-0.10156	55.527	17.6944	-17.2152	0.48877	-0.20996	0.05127
1.052	-23.8839	47.521	53.1153	0.036426	0.019141	0.014356	-15.0701	138.258	564.5164	-0.72607	0.48486	-0.084961	23.246	195.099	549.008	-0.58252	0.15674	-0.104	0.981	-17.5328	-12.1283	0.49814	-0.17754	0.037793
1.054	14.958	36.452	59.591	0.036816	0.0050782	0.0018555	-6.8971	203.334	518.6359	-0.67236	0.45215	-0.079102	-22.494	227.228	519.3574	-0.55322	0.14111	-0.10205	27.6895	5.839	-5.8372	0.50195	-0.14366	0.01582
1.056	-5.639	39.831	49.7518	0.038965	-0.015137	-0.011719	-40.741	155.0269	506.337	-0.64746	0.43701	-0.072754	-9.664	212.075	475.1765	-0.48828	0.10156	-0.10449	39.7215	19.8467	9.2334	0.49844	-0.09873	-0.00019536
1.058	0.576999999999998	28.0357	19.4045	0.067871	-0.012207	0.0043945	-7.0891	145.163	494.204	-0.59424	0.4043	-0.060547	-12.812	230.648	429.7459	-0.44726	0.077636	-0.10596	13.7113	25.258	16.3501	0.49463	-0.047754	-0.013477
1.06	-0.427	36.1392	24.1137	0.08457	-0.012891	0.0090819	-24.1006	187.894	465.1991	-0.55444	0.3728	-0.057861	5.464	190.1205	403.793	-0.4043	0.054199	-0.10596	-5.15245	37.9917	-4.738	0.50195	0.0087891	-0.032227
1.062	15.547	35.167	41.0455	0.083203	-0.028516	-0.0070312	-17.36146	112.374	440.0449	-0.51904	0.35059	-0.057617	-19.476	189.59	365.541	-0.35596	0.026855	-0.10791	-37.4814	22.138	17.228	0.50742	0.054102	-0.058008
1.064	-8.448	29.089	47.737	0.090625	-0.041797	-0.017187	-5.890629	154.524	397.695	-0.47656	0.3208	-0.067871	18.269	180.479	343.0017	-0.32397	0.0085449	-0.10449	-65.312	27.3265	46.3869	0.50322	0.097948	-0.093946
1.066	-1.775	22.9033	49.4552	0.11143	-0.029004	-0.00097655	-27.1119	149.917	373.1989	-0.44848	0.30249	-0.065918	14.597	188.068	319.2247	-0.29199	-0.0048828	-0.10303	-49.8608	4.2917	44.785	0.49854	0.14053	-0.13418
1.068	19.056	16.6689	25.0757	0.1123	-0.029785	-0.010742	-6.9616	103.945	364.58037	-0.41064	0.28418	-0.058105	32.7392	195.787	303.181	-0.26318	-0.0078125	-0.11133	-20.0483	1.65384	26.6644	0.49219	0.19248	-0.17705
1.07	25.453	36.34	9.5219	0.10918	-0.041406	-0.023242	-41.267	152.383	338.5592	-0.36279	0.24756	-0.049316	53.427	185.392	326.405	-0.25537	-0.015625	-0.10596	-69.318	-9.275	-1.0003	0.48047	0.23535	-0.20654
1.072	18.471	41.599	16.3423	0.11797	-0.032031	-0.014746	-61.363	100.6014	324.2531	-0.33789	0.22852	-0.040039	59.4569	161.32	282.597	-0.24023	-0.030762	-0.10059	-58.616	-21.2243	-16.105	0.47529	0.27695	-0.23887
1.074	-8.473	26.042	15.9517	0.12149	-0.022265	-0.010449	-38.465	88.795	291.068	-0.29395	0.20752	-0.028809	52.224	148.152	260.7551	-0.22315	-0.046875	-0.091552	-39.7308	-0.743000000000002	5.469	0.47041	0.33438	-0.2498
1.076	8.449	25.535	-1.06859	0.11114	-0.030664	-0.022461	-40.91	121.8226	270.34055	-0.26733	0.1897	-0.021728	57.5833	150.7158	211.7246	-0.20557	-0.062988	-0.080566	-49.697	0.19818	18.2902	0.44307	0.38906	-0.26895
1.078	23.0866	25.7673	2.9063	0.10059	-0.04248	-0.030762	-30.9941	88.0086	256.48152	-0.24316	0.17627	-0.022461	33.667	137.324	220.613	-0.19238	-0.07959	-0.05957	-8.5438	11.1767	18.1425	0.39375	0.44902	-0.2873
1.08	5.873	16.271	21.5641	0.10791	-0.025391	-0.0044921	-25.2898	119.242	227.7682	-0.20361	0.15625	-0.012695	50.581	148.472	191.607	-0.18896	-0.089844	-0.056152	4.489	-9.7414	9.292	0.33057	0.5083	-0.30371
1.082	-11.482	16.8394	36.5474	0.089258	-0.037598	-0.012598	-36.821	123.049	200.3787	-0.18945	0.14453	-0.0073242	63.8603	109.3369	185.507	-0.18701	-0.099121	-0.04248	-27.4073	-2.9013	18.0621	0.26279	0.57315	-0.3126
1.084	11.728	18.526	30.777	0.071289	-0.049707	-0.019629	-22.4309	73.1651	184.658	-0.15967	0.12549	-0.01416	51.7074	107.66	127.5561	-0.18921	-0.10669	-0.031982	-13.2392	-3.88	12.4719	0.19931	0.63564	-0.31064
1.086	11.704	29.189	15.4496	0.066211	-0.051953	-0.013086	-17.8308	115.836	169.583938	-0.14013	0.11938	-0.010254	21.9656	66.28	125.2279	-0.19092	-0.10254	-0.024902	49.9981	10.31	20.0512	0.14424	0.69268	-0.29815
1.088	-12.849	26.853	1.8929	0.0625	-0.046875	-0.00097656	-14.5515	80.895	147.7474	-0.11182	0.10791	-0.010742	19.253	82.967	89.1532	-0.18848	-0.10498	-0.015625	32.58	-0.517099999999999	-2.175	0.091995	0.73868	-0.28184
1.09	-10.143	11.76104	9.12194	0.043652	-0.060058	-0.015723	-0.0979999999999999	85.8626	138.0351	-0.076172	0.08252	-0.0014648	7.286	51.2714	104.593	-0.19238	-0.10498	-0.0087891	46.238	-29.1264	-17.839	0.052734	0.77148	-0.25781
1.092	10.011	12.3199	0.00619999999999976	0.028516	-0.073242	-0.023828	-4.16742	127.351	119.2121	-0.061523	0.074219	-0.0048828	49.1048	96.865	72.5604	-0.18457	-0.10303	-0.0092773	72.56	-14.1	-26.1389	0.016992	0.7914	-0.23584
1.094	10.762	7.8965	5.1536	0.032812	-0.065039	-0.0125	-3.0175	62.2097	96.056	-0.037598	0.058105	0	22.5284	41.9334	62.3462	-0.18042	-0.095459	-0.0029297	18.1789	-17.4726	-14.3214	-0.018164	0.79668	-0.21367
1.096	-21.838	3.97587	17.579	0.031055	-0.062891	-0.016406	-7.41421	78.185	90.843	-0.027588	0.051758	-0.0029297	-13.044	60.636	30.1581	-0.17432	-0.097168	-0.0058594	63.334	32.758	-6.16112	-0.043164	0.79395	-0.19492
1.098	-15.328	12.8728	24.0443	0.023438	-0.066895	-0.033203	-22.772	48.5496	82.4186	-0.015137	0.045898	0.00048828	-5.603	10.5543	43.146	-0.16162	-0.088867	-0.0029297	95.412	32.852	11.7192	-0.066602	0.76621	-0.17852
1.1	13.405	26.408	14.1498	0.026172	-0.069238	-0.044922	17.4439	5.912	77.1548	0.01123	0.040527	0.0014648	-20.043	47.43	6.113	-0.15674	-0.081543	-0.0014648	72.001	36.1944	10.915	-0.08252	0.73193	-0.16748
1.102	-3.49	20.3084	21.4157	0.035156	-0.050488	-0.026953	-5.869	58.9319	55.097	0.023926	0.03418	0.0043945	-38.3567	18.2269	25.539	-0.14258	-0.074707	0.00097656	42.151	16.29687	-13.302	-0.0875	0.68662	-0.16777
1.104	-17.899	17.1255	16.237	0.026172	-0.047363	-0.04414	-7.5771	22.325	37.7929	0.047363	0.022949	0.0058594	-32.027	47.604	-9.383	-0.13623	-0.064941	0.01123	28.3904	5.0949	15.301	-0.076074	0.63555	-0.16954
1.106	-7.279	18.0041	19.1168	0.020215	-0.047168	-0.058789	42.6141	22.775	25.5875	0.062744	0.015381	0.0085449	-18.8481	-11.192	13.7848	-0.13184	-0.057129	0.01709	13.1287	-10.846	50.377	-0.053418	0.57305	-0.17695
1.108	22.298	22.2753	10.8484	0.027344	-0.025391	-0.054199	5.5119	37.434	9.2029	0.074707	0.0092773	0.0068359	-46.3953	-2.93201	5.11963	-0.12744	-0.050781	0.02832	41.5891	-32.819	101.385	-0.019141	0.51269	-0.19375
1.11	-10.495	31.8827	-6.5244	0.034277	-0.0077148	-0.050195	15.0612	-7.64169	16.209	0.09082	0.0068359	0.014648	-28.6671	-33.245	-1.68	-0.13037	-0.04834	0.038574	51.52	-37.483	144.1209	0.017578	0.45361	-0.21826
1.112	-2.892	14.1729	4.83825	0.033789	-0.0045898	-0.062598	12.3883	17.5223	19.0292	0.099121	0.0063477	0.016113	-41.6602	-0.184000000000001	-5.095	-0.13623	-0.04248	0.054688	-44.668	-44.082	221.24539	0.043359	0.39024	-0.24844
1.114	2.463	7.4765	16.2166	0.04082	0.002832	-0.077832	-1.8838	12.2062	19.322595	0.11328	-0.0043945	0.021973	-20.7966	10.4707	-7.6637	-0.13989	-0.039551	0.064941	-64.805	-31.936	371.9361	0.051465	0.34052	-0.28399
1.116	24.52	15.8564	14.82401	0.066016	0.031543	-0.06377	11.72237	-11.32545	22.9285	0.11939	-0.0092772	0.023682	-5.145	30.9353	-21.2382	-0.1416	-0.039063	0.078125	-73.248	-29.2	611.84942	0.028028	0.29795	-0.32891
1.118	11.962	18.6758	19.13792	0.07666	0.040039	-0.07373	-7.806	41.498	-21.9764	0.12256	-0.021484	0.029297	-6.786	27.523	-18.8373	-0.15186	-0.032227	0.099121	-111.503	-37.495	784.441	-0.030566	0.26269	-0.37491
1.12	-15.7203	11.5111	22.6928	0.082227	0.045117	-0.081934	0.771700000000001	10.9361	-19.3022	0.12988	-0.032227	0.035156	3.968	24.5185	-9.1692	-0.14941	-0.028809	0.10596	-137.966	-55.3201	870.099	-0.12695	0.23633	-0.4209
1.122	16.581	-0.8002	28.179	0.090235	0.050977	-0.085059	2.291	10.5686	-14.3592	0.13525	-0.032715	0.037109	6.0571	27.666	-10.9655	-0.15234	-0.028809	0.12793	-148.664	-67.0776	939.59897	-0.26094	0.24014	-0.44267
1.124	15.91	21.529	8.32823	0.10547	0.077929	-0.060839	-14.3992	36.681	-14.84771	0.146	-0.049805	0.044434	17.328	15.455	30.951	-0.15063	-0.021729	0.14258	-162.411	-74.258	1002.504	-0.4167	0.2668	-0.46035
1.126	5.326	13.7898	7.411	0.097168	0.069824	-0.070703	-14.1385	-17.3816	3.57106	0.15136	-0.058838	0.043945	9.8291	34.114	0.1591	-0.14502	-0.023438	0.15381	-63.1905	-83.3166	1112.023	-0.57725	0.32696	-0.44394
1.128	2.233	15.2471	12.55785	0.081055	0.055664	-0.072754	5.3057	9.5136	-5.6243	0.1582	-0.074219	0.048828	24.444	29.8551	16.7733	-0.13574	-0.02002	0.16943	9.55	-29.053	1130.326	-0.73789	0.40996	-0.39638
1.13	25.453	12.2458	2.6657	0.086523	0.069727	-0.052148	-6.9298	9.60194	4.67817	0.17139	-0.09375	0.042969	28.647	55.987	1.6597	-0.12793	-0.021484	0.17627	29.734	-49.002	1099.132	-0.92139	0.49072	-0.32471
1.132	14.959	17.2644	10.7301	0.079199	0.073535	-0.041113	18.915	-24.868	10.04302	0.17627	-0.097168	0.031738	37.5173	34.0849	15.8463	-0.10498	-0.024414	0.17969	60.222	-59.134	1080.511	-1.249	0.50898	-0.18496
1.134	3.469	12.61935	22.2141	0.064746	0.057129	-0.048926	-10.423	22.2042	-8.0735	0.19287	-0.11963	0.035645	32.338	56.783	2.7698	-0.085205	-0.027832	0.18311	50.762	-109.827	1080.078	-1.7245	0.46142	-0.047949
1.136	-3.003	10.2263	34.0738	0.06377	0.045801	-0.054394	-16.1992	3.1952	-24.8542	0.20361	-0.13819	0.025635	18.771	22.7366	21.7122	-0.059082	-0.037598	0.17871	50.589	-164.77	1036.1861	-2.3468	0.3915	0.0098629
1.138	2.526	14.8112	19.38437	0.075684	0.0625	-0.02832	27.0537	12.4126	-5.6436	0.21143	-0.14893	0.013184	19	34.954	-10.6062	-0.023438	-0.050293	0.17529	126.906	-211.17	977.77	-2.8949	0.63789	-0.068164
1.14	15.685	18.8153	13.6091	0.069726	0.054883	-0.039844	-14.1271	35.066	2.81758	0.22021	-0.16309	0.0014648	31.7893	5.5248	32.543836	-0.0058594	-0.061035	0.16943	179.845	-287.422	977.913	-3.2188	0.92773	-0.060059
1.142	-16.033	11.9635	17.6482	0.060742	0.046582	-0.051856	6.8159	-10.2359	23.7285	0.21729	-0.16992	0.00048828	40.652	29.691	13.939	0.037109	-0.08252	0.16162	72.6659	-280.338	976.596	-3.3327	1.0907	0.032519
1.144	-11.568	4.0741	40.7531	0.073242	0.060644	-0.045996	4.415	9.6811	11.9804	0.21045	-0.17432	-0.0097656	26.9019	-10.83731	41.9296	0.066162	-0.09741	0.15308	32.445	-255.482	972.257	-3.3098	1.1887	0.085448
1.146	13.41	-2.322	62.623	0.080664	0.073926	-0.036523	-10.233	15.4141	-2.3513	0.20459	-0.17993	-0.011963	17.143	23.796	23.8674	0.094238	-0.11572	0.146	102.506	-164.408	981.861	-3.1519	1.2433	0.10381
1.148	9.212	17.3869	97.1924	0.074707	0.068359	-0.052734	9.599	0.84429	6.2163	0.19531	-0.17529	-0.010742	-7.1762	-13.7112	34.053	0.12598	-0.13867	0.13428	171.066	-150.308	1019.788	-2.9465	1.2707	0.066992
1.15	-23.937	11.9225	126.864	0.07666	0.071875	-0.049805	-4.9563	37.879	-7.1038	0.18701	-0.17822	-0.0068359	-32.764	25.404	4.47	0.14063	-0.15234	0.13184	182.683	-147.005	1079.547	-2.6987	1.3003	0.019043
1.152	-42.46	18.2411	173.3133	0.097558	0.09287	-0.031543	6.5947	11.8806	-6.328	0.17822	-0.17236	-0.0024414	-23.16961	0.7641	38.342	0.15332	-0.17773	0.11475	191.082	-202.4437	1142.889	-2.4392	1.328	-0.051855
1.154	-35.6353	18.8846	235.8021	0.093652	0.097167	-0.033887	24.4248	8.7229	3.1105	0.16699	-0.17041	-0.0029297	-17.58	19.6526	6.6077	0.16919	-0.19165	0.11084	139.634	-243.941	1161.227	-2.194	1.3482	-0.12774
1.156	-77.9411	18.721	282.103	0.092774	0.097949	-0.045117	9.672	17.6002	-7.635	0.15698	-0.16162	0.0051269	-22.3882	-17.4439	31.5872	0.17969	-0.21387	0.099609	94.154	-259.5872	1198.978	-2.0046	1.3517	-0.18594
1.158	-70.04	-10.6737	348.6694	0.099609	0.1123	-0.044922	11.368	-21.4172	14.3121	0.1499	-0.15186	0.003418	-31.38	1.3998	-3.1468	0.18311	-0.23193	0.088379	63.1112	-329.6202	1294.407	-1.8981	1.3258	-0.22207
1.16	-71.834	-35.8051	369.3688	0.096094	0.11904	-0.057617	27.716	13.6507	14.4774	0.14063	-0.14355	0.012207	-21.7209	-21.0473	5.80187	0.19434	-0.23438	0.080078	9.057	-369.641	1293.98	-1.8652	1.2773	-0.23975
1.162	-62.185	-45.8648	374.773	0.077344	0.12959	-0.086524	9.315	22.8774	5.4322	0.13721	-0.13916	0.010742	-45.7569	2.776	9.9443	0.21973	-0.24463	0.066406	-8.8844	-437.46	1291.1481	-1.8954	1.21	-0.24463
1.164	-68.092	-32.373	391.802	0.057812	0.13897	-0.11817	16.1892	-7.4841	10.681874	0.13818	-0.12646	0.0097656	-19.5055	-17.0152	7.3369	0.23609	-0.25122	0.052978	-18.1914	-390.414	1287.813	-1.9565	1.1306	-0.25146
1.166	-44.668	-28.79	420.402	0.040528	0.18008	-0.1251	6.4048	17.637	12.9613	0.13867	-0.11352	0.010742	-18.413	10.3221	-14.0015	0.25342	-0.25586	0.046875	-87.295	-319.657	1327.716	-2.0237	1.0649	-0.25615
1.168	24.744	-17.347	459.273	-0.010742	0.2041	-0.15723	-3.4160093	-20.2073	11.4102	0.1416	-0.10352	0.0068359	-3.9105	9.0351	-8.4775	0.271	-0.25928	0.030273	-123.063	-201.9496	1395.09	-2.082	1.0223	-0.27051
1.17	13.003	4	499.985	-0.078613	0.23486	-0.18936	17.8825	-9.3305	11.00776	0.14453	-0.085938	0.0024414	-11.346	20.6719	-12.9254	0.27441	-0.25879	0.023926	-78.637	-148.936	1445.303	-2.1304	1.0044	-0.28662
1.172	-4.126	18.70551	554.302	-0.15176	0.27509	-0.1999	-11.9695	19.7372	-5.4819	0.14502	-0.079102	-0.0014648	-18.5017	13.64099	-4.8549	0.26123	-0.24121	0.0048828	-63.5466	-131.84	1462.873	-2.1817	1.0078	-0.30352
1.174	5.251	25.956	611.4988	-0.23223	0.32627	-0.19482	9.3813	-16.4814	-4.69332	0.14404	-0.064941	-0.0019531	-16.918	4.383	7.7148	0.25171	-0.22143	-0.012207	-64.02	-111.601	1456.415	-2.2304	1.0372	-0.31767
1.176	40.773	32.02	657.749	-0.33838	0.35928	-0.2251	5.71	14.3362	-5.72975	0.1438	-0.052978	-0.0068359	7.224	5.9214	-12.6563	0.23584	-0.2002	-0.020996	-65.781	-105.239	1488.689	-2.2776	1.0821	-0.32588
1.178	24.615	38.757	679.168	-0.43652	0.39648	-0.24219	-20.7101	13.6303	-8.72	0.14258	-0.045898	-0.0073242	23.201	-9.4466	12.1753	0.21484	-0.16748	-0.052246	-79.743	-29.814	1493.27	-2.3203	1.1371	-0.33144
1.18	10.829	34.86551	701.231	-0.52373	0.45908	-0.23964	24.6651	-11.31096	2.827042	0.14355	-0.029297	-0.0073242	24.1097	13.14888	-8.1132	0.20508	-0.14941	-0.056641	-88.253	-25.884	1511.558	-2.3452	1.1938	-0.34131
1.182	35.441	21.553	726.929	-0.62149	0.50742	-0.25391	-9.1348	28.5081	-0.1575	0.1416	-0.01709	-0.0024414	19.8279	9.9413	4.734	0.19678	-0.11328	-0.069824	-76.66	-14.322	1491.431	-2.3532	1.2508	-0.34883
1.184	29.197	-1.54300000000001	734.696	-0.71875	0.54375	-0.27852	-8.68589	2.0708	20.3397	0.1416	-0.013672	-0.003418	34.2358	42.946	-20.2134	0.18848	-0.08374	-0.076416	-121.801	-74.4733	1460.38	-2.3504	1.3082	-0.36016
1.186	27.086	-18.703	749.649	-0.79082	0.59512	-0.28633	2.231	0.7759	17.3925	0.14233	0	-0.0021973	44.4118	18.9651	-6.591	0.18018	-0.054688	-0.086426	-98.047	-117.15	1482.241	-2.3442	1.3645	-0.37657
1.188	54.298	-44.9626	763.035	-0.85547	0.66211	-0.28711	-23.791	19.8389	-10.7751	0.14111	0.0058594	-0.0019531	33.013	45.769	-21.9393	0.15723	-0.019531	-0.10352	-67.8748	-124.366	1530.835	-2.3428	1.4232	-0.38799
1.19	79.82736	-67.3814	783.248	-0.93565	0.71748	-0.31064	1.548	-12.9634	-19.3224	0.14307	0.019531	0.0024414	41.9737	14.102	10.5478	0.1499	0.00048828	-0.10742	-49.9267	-123.745	1562.468	-2.355	1.478	-0.40381
1.192	87.348	-92.9989	812.8859	-0.99179	0.77246	-0.32588	12.756	7.0252	-8.0844	0.14063	0.020996	-0.00097656	38.9573	42.27	-14.0224	0.13379	0.034668	-0.12891	11.166	-96.773	1559.746	-2.3726	1.5329	-0.40908
1.194	60.7362	-119.0742	842.359	-1.0355	0.8459	-0.32354	-18.3384	6.6115	3.8257	0.13965	0.031738	0.0029297	24.91503	16.993	19.9632	0.12622	0.06543	-0.14673	56.3106	-123.495	1541.961	-2.3956	1.5767	-0.40947
1.196	42.6836	-147.2108	866.276	-1.082	0.91211	-0.3292	5.6296	-24.188	8.4759	0.13868	0.036865	0.0026856	11.559	51.233	11.8226	0.11865	0.087402	-0.16016	82.606	-105.833	1518.3642	-2.4187	1.6099	-0.40947
1.198	49.613	-151.7079	876.023	-1.1406	0.95508	-0.34668	2.947	10.4664	-3.9743	0.14111	0.04248	-0.00097656	-2.079	19.43549	44.798	0.11475	0.1167	-0.17969	109.833	-75.127	1518.633	-2.4289	1.6254	-0.3957
1.2	54.8146	-132.8022	907.381	-1.1769	0.98916	-0.34843	4.19119	-2.61828	-3.7648	0.13916	0.054199	-0.0014648	-2.774	54.526	4.2012	0.11523	0.12744	-0.19238	121.256	10.0467	1509.661	-2.4316	1.6309	-0.37939
1.202	41.4853	-120.9467	957.421	-1.1936	1.027	-0.33926	35.5109	-2.3718	10.4961	0.13428	0.062988	0	-2.7	20.9109	11.36252	0.11182	0.15234	-0.21582	120.493	77.108	1510.47	-2.4305	1.6242	-0.36045
1.204	0.257000000000001	-121.846	974.042	-1.2092	1.0536	-0.33496	7.1776	28.071	1.2896	0.13379	0.07373	0	-4.198	51.424	-6.9487	0.10254	0.17041	-0.22705	124.952	100.671	1470.0031	-2.4195	1.6036	-0.33848
1.206	-11.9595	-118.933	983.98309	-1.2249	1.0516	-0.34561	-0.895	3.1795	1.6217	0.12891	0.092285	0	-6.935	16.8412	44.4433	0.094238	0.17432	-0.23779	107.552	113.332	1405.644	-2.398	1.5719	-0.31699
1.208	-9.6921	-110.3645	1006.294	-1.2227	1.0459	-0.35742	21.1343	27.8249	-13.5114	0.12744	0.097656	-0.00048828	-23.277	27.9226	20.9877	0.082031	0.19336	-0.24951	95.74	91.772	1363.228	-2.3619	1.5357	-0.29346
1.21	-37.32925	-107.559	1041.4785	-1.2049	1.0385	-0.35781	-18.8157	19.5403	-6.1743	0.12061	0.11377	0.0024414	-17.483	-22.6576	41.69	0.068848	0.20142	-0.25952	95.844	139.24	1352.208	-2.3159	1.4771	-0.27393
1.212	-37.31128	-103.1	1085.927	-1.1875	1.0242	-0.36289	17.3869	-10.52216	14.5305	0.11524	0.12817	0.0021973	-26.277	-1.467	11.4336	0.056641	0.2041	-0.26465	53.0311	129.35964	1367.344	-2.2475	1.4173	-0.25586
1.214	-7.073	-107.274	1087.123	-1.1785	0.99571	-0.37812	19.9436	23.59	0.42778	0.11084	0.1377	-0.00048828	-23.4039	-31.426	17.7647	0.033203	0.21436	-0.2749	28.0514	154.5947	1349.274	-2.1723	1.3519	-0.24111
1.216	-15.462	-102.602	1084.6287	-1.1614	0.96358	-0.3958	7.1729	8.9174	-8.6838	0.104	0.14697	0	-35.807	19.844	23.6723	0.027344	0.21777	-0.27588	-0.331	155.8178	1293.889	-2.0879	1.2816	-0.22354
1.218	-20.413	-106.347	1139.4648	-1.1328	0.94531	-0.40332	12.8198	9.3619	-5.2388	0.10059	0.15479	0.0024414	-18.6629	4.5816	33.262	0.0092773	0.21777	-0.28223	-16.3299	134.7286	1316.47	-2.0091	1.2194	-0.1999
1.22	-18.2996	-88.528	1165.79	-1.1218	0.92627	-0.4167	1.5467	28.651	-9.6984	0.092773	0.16699	0.00097656	-13.292	24.48	6.21207	0	0.22192	-0.28418	-4.4597	162.578	1340.397	-1.9292	1.1499	-0.19141
1.222	-22.961	-87.931	1192.785	-1.1131	0.91065	-0.43173	6.50448	-8.1877	-2.242	0.090576	0.17822	-0.0012207	-41.3856	-9.2306	32.31666	-0.0092773	0.21973	-0.28174	-23.0687	152.503	1368.097	-1.8569	1.0907	-0.17344
1.224	-33.39	-94.5878	1220.4145	-1.1163	0.89893	-0.46572	24.3037	8.5263	8.6281	0.090332	0.18848	0.0029297	-34.65	-14.6408	41.326	-0.023926	0.19971	-0.3042	-42.1464	203.108	1328.481	-1.7902	1.034	-0.1626
1.226	-40.459	-113.937	1248.97	-1.1244	0.90645	-0.4916	-8.1937	16.0528	-13.7857	0.083008	0.20264	0.00097656	-0.893000000000001	-63.569	69.498	-0.034668	0.18262	-0.31738	-103.603	181.201	1292.372	-1.7246	0.97931	-0.15088
1.228	-14.989	-102.708	1277.299	-1.146	0.93799	-0.51465	11.2945	-13.899	5.6068	0.085449	0.20361	-0.00097656	15.555	-41.9637	85.273	-0.056152	0.14355	-0.34521	-73.933	187.462	1253.77243	-1.6666	0.92832	-0.13731
1.23	20.202	-92.2564	1283.414	-1.1869	0.96973	-0.54199	-7.8179	30.502	9.1095	0.074219	0.21973	-0.0019531	10.4119	-27.3814	104.62	-0.081787	0.13306	-0.36133	-22.6492	168.079	1245.848	-1.6094	0.87891	-0.12744
1.232	2.258	-89.855	1310.5605	-1.2359	1.0103	-0.56552	-9.81451	8.7231	5.6748	0.065674	0.22314	-0.0058594	6.609	-12.0623	185.25989	-0.12451	0.12549	-0.37793	-20.688	149.954	1236.102	-1.5509	0.83096	-0.1207
1.234	-10.573	-100.9366	1338.7511	-1.2811	1.0603	-0.58623	8.7757	-1.7515	56.3293	0.048828	0.22803	-0.016113	60.2043	-12.4162	230.519	-0.2085	0.12793	-0.38477	2.582	154.486	1199.88	-1.4946	0.78477	-0.11191
1.236	-0.527999999999999	-102.109	1351.6639	-1.3264	1.1034	-0.60527	-14.5678	-10.844	85.9073	0.0078125	0.22705	-0.043457	47.046	-3.92	246.046	-0.26367	0.13623	-0.38232	-28.793	162.045	1166.69	-1.4347	0.73515	-0.10645
1.238	24.6414	-79.6975	1337.4333	-1.3784	1.1372	-0.62549	9.6344	-79.35	136.55	-0.020508	0.22998	-0.056152	57.4008	9.5746	279.697	-0.38623	0.16553	-0.35986	-59.084	209.2105	1089.749	-1.371	0.68467	-0.10352
1.24	39.9887	-70.6475	1355.0715	-1.4489	1.1768	-0.6501	10.692	-51.8028	187.8868	-0.094727	0.23975	-0.066895	39.384	34.8587	365.984	-0.50073	0.19458	-0.32471	-64.4517	215.9448	1064.8025	-1.3125	0.6416	-0.10449
1.242	48.4445	-63.9588	1359.8322	-1.5258	1.214	-0.67774	-42.965	-22.914	234.843	-0.16015	0.25098	-0.065918	36.664	71.4251	431.788	-0.62988	0.2168	-0.28418	-1.66699999999999	263.895	1005.403	-1.2483	0.59307	-0.097949
1.244	48.9198	-58.2683	1347.6911	-1.5973	1.2644	-0.69571	-54.129	-79.681	338.144	-0.24658	0.25098	-0.05127	30.366	82.144	548.724	-0.87695	0.21387	-0.21729	-1.464	249.7751	966.839	-1.1813	0.54882	-0.092968
1.246	14.4711	-50.99729	1353.831	-1.6659	1.3136	-0.71533	-68.914	-67.694	431.3	-0.41455	0.26807	-0.032227	45.6495	96.332	610.181	-1.0332	0.20801	-0.19531	47.3686	269.6402	932.798	-1.118	0.50508	-0.090234
1.248	16.5648	-39.2455	1359.6491	-1.7285	1.3594	-0.73828	-98.973	-119.2159	470.865	-0.51318	0.28174	-0.022949	21.6642	38.357	724.853	-1.3594	0.2207	-0.2041	82.698	281.06658	892.751	-1.05	0.46485	-0.087988
1.25	14.2917	-35.4419	1363.67	-1.7869	1.4115	-0.76777	-92.105	-154.602	499.7511	-0.73047	0.29688	-0.00097656	29.129	25.4248	815.109	-1.585	0.26465	-0.22436	103.577	274.1912	876.124	-0.98193	0.42432	-0.085938
1.252	18.5804	-26.4853	1373.6125	-1.8387	1.4656	-0.79179	-87.9678	-114.3156	525.741	-0.9021	0.3252	0.043945	22.215	-17.673	931.8513	-1.7891	0.33887	-0.23096	151.859	278.15	846.942	-0.91445	0.38555	-0.084863
1.254	3.93	-26.1695	1365.464	-1.8781	1.5168	-0.82031	-59.886	-99.9857	573.736	-1.084	0.36133	0.094727	22.61	1.047	959.658	-2.0366	0.47656	-0.21191	148.277	230.1552	808.2413	-0.84092	0.34424	-0.082715
1.256	-7.182	-40.643	1363.831	-1.906	1.5685	-0.84902	9.036	-48.3263	631.866	-1.334	0.41504	0.15576	63.283	-65.701	1069.78	-2.1582	0.55615	-0.20117	152.801	231.7752	748.9192	-0.76709	0.30986	-0.084278
1.258	-33.6645	-40.215	1359.0651	-1.9331	1.6157	-0.88232	39.018	-14.94289	645.626	-1.4688	0.43945	0.18066	60.496	-96.089	1069.9112	-2.3848	0.7168	-0.17383	138.513	213.675	686.3712	-0.69082	0.27041	-0.0875
1.26	-19.1897	-39.545	1354.0764	-1.9387	1.6485	-0.90664	43.136	-45.7867	673.552	-1.7417	0.50049	0.2207	45.017	-192.131	1098.361	-2.5213	0.83716	-0.15649	161.343	227.19427	639.037	-0.6167	0.23291	-0.088379
1.262	-13.05637	-32.265	1377.712	-1.95	1.6793	-0.92305	-1.494	-2.982	726.5372	-1.9566	0.56543	0.21899	-16.749	-173.72	1055.557	-2.6074	0.95996	-0.14941	123.002	218.0043	621.332	-0.54385	0.19678	-0.092871
1.264	-27.6158	-31.2113	1395.701	-1.9582	1.7008	-0.94141	13.8985	-7.189	775.089	-2.1465	0.65625	0.19531	-30.2635	-229.774	1090.177	-2.6035	1.1045	-0.16309	67.006	187.10757	596.186	-0.47031	0.15869	-0.10195
1.266	-36.197	-22.8329	1381.5172	-1.9634	1.7249	-0.94971	41.6122	-32.764	814.504	-2.3901	0.77246	0.14453	-60.9993	-179.2125	1108.376	-2.5581	1.1646	-0.18408	74.351864	190.06612	541.752	-0.4125	0.14267	-0.13906
1.268	-46.0196	-19.8324	1348.3516	-1.9702	1.7368	-0.94873	30.319	5.877	809.746	-2.5034	0.86768	0.093262	-61.81	-220.456	1173.339	-2.394	1.2153	-0.26514	65.515	180.1211	507.289	-0.38476	0.11856	-0.14707
1.27	-74.423	-14.6831	1343.854	-1.9808	1.7489	-0.93935	66.2893	-37.948	818.875	-2.5703	1.1016	-0.024902	-83.841	-177.719	1165.176	-2.2432	1.2036	-0.35303	60.9932	235.269	471.299	-0.34375	0.071289	-0.13281
1.272	-72.109	-12.9012	1356.27	-1.9863	1.7521	-0.92725	45.157	-45.183	829.5505	-2.44	1.2182	-0.056397	-77.773	-233.133	1185.741	-2.084	1.1553	-0.43945	61.312	248.944	463.155	-0.28672	0.015037	-0.12558
1.274	-59.248	-3.174	1346.49436	-2.0019	1.763	-0.91474	21.058	-32.658	832.048	-2.2085	1.2788	-0.060059	-87.541	-198.987	1175.8937	-1.8862	1.0337	-0.53076	28.6507	261.086	445.909	-0.22051	-0.034963	-0.11758
1.276	-64.401	8.477	1320.8665	-2.0127	1.7752	-0.90176	63.595	-116.6107	870.177	-1.8608	1.2856	-0.071289	-106.266	-216.9728	1222.0148	-1.8047	0.96387	-0.57275	0.949999999999999	219.779	377.6365	-0.15918	-0.071682	-0.11015
1.278	-93.075	13.1903	1340.128	-2.0332	1.7842	-0.89063	136.211	-128.7443	894.666	-1.7065	1.27	-0.10254	-86.858	-146.806	1237.288	-1.6816	0.80664	-0.61133	-29.553	198.492	329.5676	-0.11523	-0.097364	-0.11992
1.28	-67.898	7.2235	1343.6563	-2.0447	1.7756	-0.88848	99.052	-189.239	925.9187	-1.4663	1.2134	-0.17139	-39.156	-155.749	1287.144	-1.6333	0.70019	-0.61621	-32.466	200.184	289.0599	-0.07959	-0.11279	-0.13086
1.282	-49.993	19.4603	1337.6026	-2.0508	1.7754	-0.87598	98.599	-255.178	984.924	-1.3398	1.1528	-0.21216	-30.5343	-118.567	1314.504	-1.6206	0.60986	-0.6084	-19.272	191.043	291.197	-0.053323	-0.12431	-0.14443
1.284	-38.526	45.823	1301.447	-2.0508	1.7699	-0.85879	60.88696	-226.588	995.502	-1.2432	1.083	-0.24609	-17.2237	-169.92	1326.3059	-1.6636	0.53174	-0.58936	-14.8374	203.808	241.9134	-0.024907	-0.13642	-0.14687
1.286	-19.7375	51.799	1293.2943	-2.0413	1.7573	-0.83799	51.15343	-249.79	1006.6654	-1.1655	0.979	-0.28467	-21.0996	-190.058	1329.992	-1.7134	0.50928	-0.57275	-61.285	119.137	208.9041	-0.0053768	-0.1501	-0.14453
1.288	-11.6898	42.6354	1289.483	-2.0269	1.7427	-0.82178	79.78	-229.63	1055.6256	-1.1406	0.92188	-0.29785	-3.9193	-235.673	1366.504	-1.8555	0.50195	-0.53027	-65.286	98.189	189.604	0.00097656	-0.16221	-0.13818
1.29	-9.5714	37.199	1252.089	-1.999	1.7178	-0.8	29.4816	-186.112	1090.4139	-1.1343	0.81104	-0.30908	-27.4304	-223.445	1377.576	-1.9903	0.53223	-0.50146	-83.066	59.373	180.087	-0.0039063	-0.17188	-0.13428
1.292	2.7769	38.475	1233.6941	-1.9636	1.6876	-0.779	41.032	-213.895	1133.7347	-1.1749	0.74609	-0.30859	-19.8369	-234.255	1430.0386	-2.1348	0.58545	-0.47412	-61.722	80.964	171.325	-0.026676	-0.17354	-0.12422
1.294	14.3201	24.291	1242.92	-1.9249	1.6528	-0.76455	21.76	-160.631	1169.919	-1.2534	0.6958	-0.29102	-23.75	-229.924	1454.533	-2.3198	0.67432	-0.45557	-15.564	111.1177	139.8221	-0.067328	-0.17098	-0.1204
1.296	-5.9611	15.9671	1248.0218	-1.8818	1.6166	-0.7459	-5.6977	-134.775	1172.8758	-1.4214	0.67432	-0.26123	-18.868	-255.23	1454.7753	-2.4023	0.72461	-0.4541	-26.074	99.8938	152.575	-0.12165	-0.15575	-0.10869
1.298	-9.1536	27.3156	1209.3994	-1.834	1.584	-0.73242	3.651	-159.3202	1203.3709	-1.5269	0.68213	-0.24805	5.20800000000001	-243.447	1473.024	-2.5464	0.81787	-0.46045	-3.074	89.2058	129.596	-0.17719	-0.13093	-0.097348
1.3	13.2449	36.7953	1186.89343	-1.7968	1.5419	-0.71679	3.436	-93.828	1210.5597	-1.7378	0.72217	-0.22266	19.468	-207.634	1483.26	-2.624	0.89599	-0.48169	10.981	54.476	103.647	-0.22363	-0.09668	-0.083984
1.302	43.2965	56.50552	1187.1332	-1.76	1.5009	-0.70576	4.846	-95.694	1202.124	-1.8923	0.76587	-0.20898	32.169	-129.146	1506.359	-2.6792	0.979	-0.50195	41.534	50.6983	83.865	-0.25776	-0.065081	-0.064484
1.304	12.2478	66.2031	1180.466	-1.7191	1.4645	-0.68506	14.202	-92.364	1237.0042	-2.0249	0.81982	-0.20508	78.1784	-81.541	1533.6418	-2.7183	1.0864	-0.54346	82.537	38.775	50.694	-0.28625	-0.044617	-0.045365
1.306	18.8647	69.985	1132.4675	-1.6861	1.4292	-0.66904	-2.734	-52.775	1247.701	-2.1543	0.89258	-0.19238	103.3041	-50.823	1539.79	-2.7363	1.1338	-0.56934	88.665	56.4416	25.568	-0.30852	-0.017689	-0.027811
1.308	5.6094	70.164	1090.1107	-1.6543	1.3965	-0.65234	-33.1839	-98.9057	1283.521	-2.2012	0.92578	-0.19678	122.592	-44.425	1513.7986	-2.7456	1.2192	-0.62549	77.413	26.421	3.9913	-0.32555	0.0057972	-0.020417
1.31	5.983	67.125	1090.0136	-1.6296	1.3618	-0.63466	-11.561	-76.986	1354.493	-2.2676	0.99805	-0.22656	111.821	-22.608	1530.4028	-2.7334	1.2598	-0.66358	74.427	48.7216	-26.7664	-0.33496	0.029297	-0.013184
1.312	6.4998	75.839	1087.429	-1.6003	1.321	-0.62217	-49.74	-100.963	1381.441	-2.3259	1.054	-0.26245	85.53135	-27.104	1515.947	-2.707	1.2881	-0.69727	95.825	44.6449	-34.873	-0.34369	0.045909	-0.015244
1.314	-1.035	75.87	1050.7779	-1.5729	1.2897	-0.6081	-49.1126	-161.688	1427.379	-2.3667	1.1177	-0.30322	33.256	-16.836	1509.061	-2.6523	1.2988	-0.72363	75.785	17.3348	-14.878	-0.34572	0.058641	-0.019852
1.316	-14.1889	92.764	1030.978	-1.5379	1.2533	-0.59199	-25.9075	-108.1487	1445.555	-2.3979	1.188	-0.34521	23.159	-9.753	1500.584	-2.6191	1.2891	-0.73242	81.174	39.523	-11.886	-0.34148	0.063364	-0.025423
1.318	-42.3976	93.856	1032.9406	-1.5015	1.2212	-0.57471	17.0226	-120.424	1440.454	-2.4038	1.2153	-0.35889	4.791	-36.0621	1525.3226	-2.5503	1.2563	-0.74756	62.267	31.6058	0.98428	-0.32676	0.068439	-0.033612
1.32	-59.883	96.643	997.47298	-1.4561	1.1829	-0.55674	13.5477	-113.126	1468.482	-2.4082	1.2441	-0.38232	33.092	-39.361	1544.328	-2.5007	1.2132	-0.75903	45.641	57.592	-4.7546	-0.30127	0.061523	-0.032715
1.322	-52.401	91.709	973.8654	-1.4101	1.1445	-0.54297	8.5895	-64.384	1450.8773	-2.419	1.2569	-0.39209	21.939	-65.6229	1549.985	-2.4473	1.1582	-0.76172	56.332	6.5809	10.9314	-0.27306	0.048129	-0.039085
1.324	-56.2306	95.569	970.975	-1.3653	1.1082	-0.52266	6.00716	-112.237	1460.37	-2.4395	1.2539	-0.39258	16.429	-53.931	1513.4191	-2.3784	1.0854	-0.76318	51.8306	-11.614	22.0902	-0.25018	0.032602	-0.034967
1.326	-35.9583	101.88	950.187	-1.3176	1.0695	-0.5126	13.842	-91.993	1500.761	-2.4883	1.252	-0.39063	21.184	-54.1537	1574.725	-2.3457	1.0449	-0.75488	-7.191	-18.432	-2.321	-0.23273	0.015384	-0.02953
1.328	-33.1886	90.6589	919.724	-1.2651	1.0337	-0.49756	25.5456	-58.5817	1501.0179	-2.5151	1.2524	-0.39111	7.585	-30.736	1559.292	-2.2866	0.98291	-0.74951	-11.6847	-15.5066	-5.3786	-0.21493	0.00071356	-0.01615
1.33	-36.4792	95.0267	881.4925	-1.216	1.002	-0.48408	34.906	-74.8576	1506.8495	-2.5737	1.2466	-0.37061	45.44391	-30.489	1576.714	-2.2546	0.94458	-0.73901	-29.328	23.9642	20.785	-0.20166	-0.017578	0.00097656
1.332	-41.3511	94.443	882.534	-1.1717	0.97314	-0.471	45.822	-3.437	1485.592	-2.6152	1.2403	-0.35474	58.341	1.677	1524.689	-2.2246	0.91016	-0.72266	-77.892	34.537	35.0178	-0.18645	-0.034798	0.012182
1.334	-9.171	96.658	871.8744	-1.1327	0.94502	-0.45849	36.35	11.6114	1443.974	-2.6538	1.2388	-0.32813	18.687	-6.623	1497.442	-2.1929	0.88525	-0.71045	-60.671	38.886	27.4323	-0.17285	-0.053198	0.02809
1.336	-15.025	98.11	842.034	-1.098	0.91953	-0.44805	4.4146	-4.70424	1458.301	-2.6816	1.2422	-0.30664	-34.349	35.306	1471.58	-2.1714	0.87744	-0.69873	-23.126	2.68688	9.2894	-0.15833	-0.066533	0.040346
1.338	-14.776	115.47	805.913	-1.0645	0.89258	-0.43262	20.003	59.353	1457.089	-2.6895	1.248	-0.29492	-28.4519	34.84131	1446.616	-2.127	0.87109	-0.67871	-84.17	0.5806	6.027	-0.13759	-0.081666	0.047598
1.34	-2.144	114.9549	792.619	-1.031	0.86972	-0.42109	48.3962	8.0954	1477.652	-2.6904	1.2451	-0.27246	-28.036	74.2144	1414.366594	-2.0886	0.86547	-0.6643	-71.461	-13.7128	26.8398	-0.11084	-0.10156	0.054199
1.342	11.504	108.8315	790.191	-0.99891	0.85049	-0.41025	51.857	8.6999	1520.354	-2.6738	1.2363	-0.25903	-14.663	53.977	1413.105	-2.0483	0.86182	-0.6499	-55.289	-0.890599999999999	28.3773	-0.081073	-0.12021	0.056697
1.344	20.1956	111.1749	744.908	-0.96611	0.82783	-0.39658	22.8483	29.601	1499.846	-2.6484	1.2266	-0.25244	-16.685	63.037	1355.817	-1.9844	0.85156	-0.61914	-59.033	5.8218	2.93159	-0.044632	-0.14305	0.047654
1.346	14.976	109.13698	710.911	-0.93438	0.80703	-0.38438	25.358	-38.622	1497.942	-2.6187	1.2114	-0.24365	1.95	53.375	1333.879	-1.9492	0.8457	-0.60645	-21.911	-8.1252	4.276814	-0.014606	-0.15732	0.036322
1.348	30.967	113.3076	695.5036	-0.90234	0.7832	-0.37842	16.8804	4.8906	1509.359	-2.5928	1.1943	-0.23218	-6.431	95.5007	1284.616	-1.8843	0.82471	-0.57568	-28.15587	15.5316	-5.7814	0.012826	-0.17408	0.025008
1.35	42.74	115.4174	674.247	-0.86729	0.76026	-0.36768	-4.255	3.3351	1481.843	-2.5698	1.1841	-0.2207	22.359	95.9017	1247.675	-1.8159	0.79932	-0.53662	-69.247	-8.53	10.93373	0.043945	-0.18457	0.016602
1.352	52.88355	125.446	653.369	-0.83233	0.73526	-0.35869	4.629	-35.5797	1509.2313	-2.5469	1.1699	-0.20801	38.083	119.751	1222.582	-1.7852	0.78125	-0.52344	-37.5967	34.021	20.5737	0.067674	-0.19054	0.016886
1.354	58.23637	128.467	619.3321	-0.79484	0.70713	-0.35166	-15.0628	34.2961	1486.613	-2.541	1.168	-0.20117	72.177	84.134	1219.913	-1.7124	0.74365	-0.49707	19.9626	8.1483	23.8206	0.085905	-0.19729	0.01511
1.356	55.8783	128.021	605.31009	-0.75567	0.67755	-0.34277	-28.947	-4.466	1464.8326	-2.5288	1.1567	-0.18848	51.7372	106.188	1190.414	-1.6494	0.71241	-0.47754	12.339	-14.5182	25.102	0.091857	-0.19514	0.010789
1.358	62.9331	123.737	584.31239	-0.72266	0.64453	-0.3335	-25.6695	21.609	1495.912	-2.5125	1.1526	-0.18213	52.492	74.736	1196.829	-1.5854	0.68994	-0.45703	55.76	-37.772	4.911	0.10054	-0.1933	0.0047158
1.36	35.073	101.1962	551.9231	-0.68417	0.62382	-0.32441	-34.451	84.158	1457.002	-2.4961	1.1484	-0.17285	36.528	116.3434	1140.7822	-1.4883	0.65137	-0.43066	69.455	-48.3954	-14.0582	0.11279	-0.18799	0.0043945
1.362	20.085	102.2151	531.161	-0.64792	0.59812	-0.31357	-32.073	48.7384	1427.645	-2.4683	1.1431	-0.16357	24.4474	104.592	1120.0875	-1.4434	0.63867	-0.42041	63.662	-21.3663	-23.6373	0.12631	-0.18252	0.00075883
1.364	14.771	104.6868	510.722	-0.61823	0.56999	-0.30496	-17.1426	111.717	1421.504	-2.4565	1.1372	-0.16113	28.973	146.9716	1063.8276	-1.3452	0.61279	-0.39014	85.527	9.5756	-16.6163	0.14219	-0.17354	-0.0078759
1.366	33.776	104.5199	494.99774	-0.5866	0.54403	-0.29687	-41.4413	132.111	1370.128	-2.4121	1.1211	-0.15723	30.8899	125.216	1034.1182	-1.2764	0.59278	-0.37036	103.781	50.447	-2.746	0.16521	-0.17	-0.024274
1.368	19.387	104.017	467.678	-0.55859	0.51953	-0.28955	-15.408	108.7297	1369.287	-2.3699	1.1164	-0.15503	33.748	164.7988	991.3692	-1.2065	0.57275	-0.34717	96.393	28.83	-1.157	0.18694	-0.16306	-0.045144
1.37	-20.916	94.987	453.5471	-0.53022	0.49935	-0.27902	18.2848	175.764	1355.961	-2.3164	1.1035	-0.15625	5.58	147.087	968.4123	-1.1201	0.55469	-0.31689	73.474	32.259	-10.1553	0.21094	-0.15088	-0.067871
1.372	-11.135	97.003	432.8325	-0.50437	0.47977	-0.26447	5.70417	118.477	1335.09	-2.2358	1.0825	-0.15869	11.491	195.18	921.455	-1.0776	0.54443	-0.30664	76.753	14.7377	-8.9315	0.23543	-0.14385	-0.10153
1.374	13.295	103.275	411.6632	-0.47863	0.45905	-0.25436	-6.7258	113.1387	1358.5124	-2.1948	1.0669	-0.16943	10.7564	189.046	899.0705	-1.0029	0.52637	-0.27539	43.0853	30.5729	-3.299	0.25955	-0.13585	-0.136
1.376	-6.672	95.884	380.0868	-0.45592	0.43133	-0.24046	2.56921	134.015	1312.8354	-2.0996	1.041	-0.18359	9.596	238.805	846.1	-0.94946	0.521	-0.26123	40.3541	34.1967	1.604	0.27908	-0.12492	-0.16765
1.378	-27.985	92.7244	372.206	-0.43652	0.41016	-0.23291	11.408	77.151	1297.4944	-2.0202	1.0197	-0.18091	-10.1663	225.137	815.1949	-0.90039	0.50879	-0.24609	37.978	13.88871	13.846	0.29102	-0.10782	-0.19706
1.38	-11.117	87.637	346.684	-0.4081	0.38766	-0.21841	21.912	144.0258	1280.86	-1.939	0.99658	-0.18311	9.176	273.091	791.286	-0.82959	0.49854	-0.21582	-15.6915	19.2396	-14.498	0.29053	-0.086426	-0.21631
1.382	-17.058	85.0144	325.9271	-0.3827	0.36208	-0.21058	37.9235	136.8655	1252.3828	-1.8477	0.95703	-0.19922	-11.61902	259.181	749.7154	-0.80566	0.49805	-0.20264	-23.8018	0.44975	15.63	0.27949	-0.056438	-0.23565
1.384	-26.108	87.818	304.10438	-0.35482	0.33423	-0.19606	33.8776	92.934	1242.94373	-1.8086	0.94141	-0.20215	-33.0706	275.187	690.7846	-0.74512	0.49219	-0.17773	-1.3149	41.472	24.661	0.26015	-0.024698	-0.25166
1.386	-29.857	87.948	302.2695	-0.3267	0.30966	-0.18916	33.607	157.2485	1217.2997	-1.7231	0.91064	-0.20459	-69.822	231.9287	674.2978	-0.70459	0.48779	-0.1582	-58.051	34.5657	38.769	0.22733	0.0038142	-0.2587
1.388	7.3	99.714	296.361	-0.29834	0.28516	-0.18066	47.936	96.122	1181.9888	-1.6551	0.88404	-0.20678	-86.481	232.394	638.564	-0.66797	0.48535	-0.13721	-61.651	29.3501	15.9955	0.18926	0.031058	-0.25605
1.39	-1.38	105.29	269.822	-0.27567	0.26257	-0.17058	46.8083	128.177	1193.2236	-1.5933	0.85596	-0.2124	-82.976	194.0692	627.632	-0.62012	0.47852	-0.11133	-37.277	5.5449	5.5257	0.15527	0.059082	-0.25244
1.392	-13.988	88.959	241.8724	-0.25789	0.23738	-0.16275	68.852	189.725	1157.674	-1.5117	0.81055	-0.2207	-45.2397	193.942	578.981	-0.60254	0.47559	-0.10156	-70.849	-28.7683	5.53	0.11192	0.081444	-0.23232
1.394	-9.035	82.434	244.3621	-0.24091	0.21658	-0.15445	44.6957	140.4957	1109.7367	-1.4683	0.79053	-0.22607	-79.098	168.4506	521.7146	-0.5625	0.46826	-0.074707	-46.903	-38.779	35.3333	0.053716	0.11065	-0.22236
1.396	53.9502	78.1084	240.222	-0.22044	0.19311	-0.14668	56.0026	207.93	1069.96413	-1.3784	0.74072	-0.2207	-49.314	174.659	495.29339	-0.54101	0.45654	-0.060547	-20.0381	-34.124	46.325	-0.020112	0.1458	-0.21806
1.398	35.3064	70.9765	219.82	-0.19775	0.17383	-0.13037	48.1511	204.663	1001.019	-1.3171	0.70825	-0.21899	-65.027	160.1832	464.6041	-0.51953	0.44482	-0.044434	-68.185	-0.6463	11.8729	-0.091013	0.18486	-0.20996
1.4	13.733	55.41579	194.217	-0.18448	0.14671	-0.11553	24.662	174.995	1009.451	-1.2573	0.67432	-0.21875	-37.789	179.647	433.207	-0.49561	0.42822	-0.033691	-68.458	-1.82312	13.1659	-0.1626	0.22607	-0.20801
1.402	50.2244	60.64	195.129	-0.16511	0.12232	-0.10421	33.18	238.503	975.4179	-1.1719	0.62842	-0.21143	-38.029	186.6697	406.59	-0.48535	0.41943	-0.01416	-63.471	30.4013	19.289	-0.221	0.25898	-0.20283
1.404	63.6281	69.599	199.495	-0.14816	0.096273	-0.093341	35.5144	176.2248	921.248	-1.1304	0.60986	-0.21045	15.2485	184.599	374.891	-0.46045	0.39893	-0.003418	-55.516	15.0526	19.8314	-0.26992	0.28984	-0.20215
1.406	32.0571	73.417	170.264	-0.13146	0.074701	-0.083317	19.225	187.7575	911.69538	-1.0425	0.56006	-0.20996	-20.2764	157.391	345.389	-0.44458	0.38013	0.0053711	-16.13147	5.62	15.5289	-0.30625	0.3168	-0.21075
1.408	14.693	57.899	143.876	-0.11816	0.057617	-0.074219	13.982	213.833	858.4119	-0.98463	0.52661	-0.20874	-20.6991	130.022	309.82145	-0.42725	0.36572	0.015137	40.367	-6.0464	-5.784	-0.32861	0.3377	-0.22724
1.41	65.6711	62.152	159.9373	-0.10118	0.037353	-0.06573	-3.96	145.841	838.607	-0.92432	0.48975	-0.19678	-48.488	139.475	282.4097	-0.40234	0.3335	0.022949	19.6208	-27.7805	-14.2543	-0.33838	0.35693	-0.24854
1.412	61.9632	59.1275	162.9366	-0.084983	0.018371	-0.060172	16.184	222.131	834.578	-0.86133	0.44922	-0.20801	-28.2966	133.149	259.1493	-0.38672	0.32227	0.029785	26.362	-0.8627	-12.826	-0.3333	0.36406	-0.27256
1.414	14.003	42.964	145.8138	-0.067307	-0.0003116	-0.053113	37.7031	199.96	767.1059	-0.83008	0.42578	-0.2124	-26.5958	152.2671	219.189	-0.36133	0.2959	0.02832	59.059	-33.948	22.266	-0.32422	0.36445	-0.31172
1.416	11.119	49.9057	120.96	-0.054771	-0.015754	-0.04834	12.658	152.576	751.1284	-0.75781	0.37891	-0.19727	16.5359	122.855	181.2618	-0.33838	0.28564	0.03418	67.49	-29.566	33.062	-0.30195	0.35235	-0.3582
1.418	35.9597	55.387	118.1886	-0.036621	-0.028809	-0.04248	16.166	211.54	722.349	-0.70752	0.34546	-0.18823	0.1465	132.123	128.229	-0.3125	0.27148	0.039063	89.249	-49.127	53.765	-0.27246	0.34424	-0.39903
1.42	26.956	56.587	110.183	-0.027845	-0.044295	-0.037406	4.792	147.06494	684.619	-0.6543	0.31055	-0.17383	13.3029	112.63	114.265	-0.27783	0.25732	0.045898	88.093	-36.918	96.8084	-0.23975	0.33936	-0.42725
1.422	-18.211	52.748	95.072	-0.015776	-0.062263	-0.026796	24.941	169.761	669.261	-0.58887	0.26025	-0.16113	21.619	121.55	98.267	-0.26172	0.25586	0.049316	53.951	-44.971	126.2126	-0.2252	0.34053	-0.44424
1.424	-16.942	44.474	88.909	-0.0027501	-0.07603	-0.030715	27.78804	195.907	616.763	-0.56201	0.23682	-0.15771	22.6013	75.7346	102.524	-0.22607	0.23828	0.05127	55.212	-68.48	177.6216	-0.23584	0.34834	-0.44756
1.426	13.467	48.546	80.544	0.010778	-0.093167	-0.02913	15.13	130.277	574.3476	-0.52051	0.19531	-0.15381	4.663	93.717	69.867	-0.20141	0.23218	0.048096	93.588	-87.534	223.082	-0.27529	0.35264	-0.44638
1.428	6.236	44.868	81.4582	0.022949	-0.11133	-0.023926	50.6531	197.7384	543.385	-0.48388	0.16699	-0.15014	28.5274	64.101	72.5084	-0.17188	0.22168	0.047363	78.19427	-120.6589	281.397	-0.34219	0.36299	-0.42754
1.43	-26.275	47.041	72.2827	0.033228	-0.12143	-0.020302	26.1389	174.7246	489.96267	-0.44824	0.14209	-0.13818	5.241	85.837	35.895	-0.13037	0.21729	0.043945	74.3161	-78.187057	353.885	-0.42578	0.37158	-0.40186
1.432	-46.484	37.0499	85.8152	0.044736	-0.12825	-0.016098	41.0854	159.3481	460.903	-0.39795	0.098145	-0.11377	-10.0688	53.311	60.38312	-0.11523	0.21777	0.035645	40.002	-29.255	459.43	-0.52852	0.37998	-0.37168
1.434	-19.712	54.093	76.5182	0.052189	-0.13174	-0.013374	24.168	209.225	441.0879	-0.37646	0.081055	-0.10938	-30.202	81.6	20.305	-0.085449	0.21436	0.02832	-3.277	77.637	628.4596	-0.64453	0.37832	-0.3545
1.436	-25.3294	43.344	59.9639	0.05685	-0.13653	-0.0088905	38.6975	136.517	403.0653	-0.33496	0.043945	-0.094238	-22.3183	33.098	22.535	-0.057129	0.20434	0.035156	20.056	94.854	802.3412	-0.79258	0.36777	-0.34512
1.438	-36.62	21.9918	52.6774	0.061523	-0.13721	-0.0092773	78.164	165.4859	385.411	-0.30835	0.0090334	-0.082519	-46.876	60.132	-21.0126	-0.033691	0.18896	0.040039	30.371	67.173	953.1421	-0.99871	0.34971	-0.31435
1.44	-27.9564	32.313	60.868	0.069233	-0.14034	-0.0023484	58.704	176.865	348.3066	-0.28906	-0.015137	-0.078613	-8.0968	16.1986	3.011	0.0019531	0.16748	0.059082	-15.638	15.884	1014.861	-1.2515	0.3584	-0.27539
1.442	-8.891	44.403	51.293	0.072363	-0.14033	0.0015616	58.0341	119.8663	330.762	-0.25488	-0.040527	-0.060059	-25.646	31.1077	-25.0452	0.0097656	0.15479	0.063477	-9.768	-48.89	1114.737	-1.5456	0.42783	-0.23457
1.444	-7.822	42.735	23.2024	0.074314	-0.14657	0.0066325	57.6278	170.955	311.5367	-0.24072	-0.059082	-0.051758	-20.952413	-7.1149	20.9568	0.029785	0.12451	0.071777	10.749	-73.061	1158.021	-1.8695	0.53525	-0.17471
1.446	-16.192	23.3974	30.1849	0.07744	-0.14639	0.0071259	53.7264	141.2646	277.049	-0.22705	-0.090332	-0.048828	-23.307	32.94	-6.7843	0.041015	0.10108	0.074463	29.936	-127.821	1186.67	-2.2367	0.67276	-0.093848
1.448	-4.301	22.8982	49.0015	0.075195	-0.15283	0.0039063	36.451	118.6796	262.533	-0.22314	-0.10474	-0.046143	-28.761	-3.07	22.619	0.056152	0.075195	0.080566	22.497	-139.773	1101.2	-2.6524	0.83428	-0.048145
1.45	25.235	33.9878	53.9904	0.071286	-0.15284	0.0078143	38.4987	147.394	249.3197	-0.21533	-0.11816	-0.035645	-37.407	49.7653	5.835	0.074707	0.046387	0.082031	6.1741	-239.467	1022.458	-3.0703	1.0127	-0.045898
1.452	21.1703	25.80312	39.6834	0.067282	-0.15469	0.0043934	47.5837	85.913	235.0979	-0.18945	-0.14063	-0.017578	3.6501	30.1785	39.4886	0.083984	0.025391	0.081055	-52.923	-302.89	1008.6105	-3.3222	1.2068	-0.077735
1.454	19.378	20.6191	42.8845	0.056736	-0.16055	0.0020506	37.62619	108.4682	230.284	-0.17773	-0.15039	-0.015625	-7.069	61.613	27.9078	0.10938	-0.013184	0.087891	-96.3629	-312.28	1042.3273	-3.3367	1.375	-0.12265
1.456	17.553	23.051	50.62	0.045312	-0.16055	0.0019527	23.86528	113.8837	192.3875	-0.16992	-0.16699	-0.0019531	-6.7147	21.9772	38.26	0.13257	-0.039551	0.089356	-75.6882	-264.27	1131.9896	-3.0883	1.4891	-0.18906
1.458	25.8297	27.194	30.647	0.030762	-0.15527	0.0014648	2.558	68.132	173.581	-0.17309	-0.17553	-0.00048827	-26.1	35.41	-7.6506	0.15576	-0.070313	0.091797	-56.13044	-244.222	1180.05	-2.6906	1.5211	-0.29727
1.46	25.017	25.934	2.1695	0.012208	-0.14648	0.00039048	9.171	122.567	165.06917	-0.17139	-0.17676	0.012695	3.6385	-10.145	12.6021	0.18994	-0.10547	0.091309	-54.68	-271.195	1174.848	-2.2534	1.479	-0.4375
1.462	45.3119	13.0248	14.2368	-0.010252	-0.13242	0.00029249	-2.549	94.35	135.3392	-0.16504	-0.18555	0.019043	-9.408	11.9375	10.91153	0.20898	-0.12354	0.09375	-49.9231	-285.958	1156.6856	-1.8864	1.3827	-0.57939
1.464	34.004	8.861	18.22009	-0.034862	-0.11758	0.003418	-0.777000000000001	74.2271	120.326	-0.15576	-0.18555	0.016113	27.1203	-15.98	40.286	0.25146	-0.16455	0.091797	-23.247	-268.9874	1176.081	-1.619	1.2638	-0.69209
1.466	32.363	23.8323	18.9649	-0.05791	-0.09512	0.0039061	14.7351	107.249	120.4491	-0.14795	-0.18799	0.024414	14.342	7.4309	34.2165	0.27978	-0.1936	0.087403	31.5043	-151.543	1238.505	-1.4476	1.129	-0.76631
1.468	36.8861	30.272	18.7522	-0.087402	-0.068359	0.0043945	-13.5183	62.58871	97.026	-0.13281	-0.19287	0.029053	41.4473	-7.03559	14.7996	0.30518	-0.22412	0.075684	60.53	-108.63	1305.197	-1.3385	0.97716	-0.80977
1.47	25.5637	19.2439	25.7047	-0.10889	-0.0333	0.0069336	-24.2337	91.227	97.40059	-0.12012	-0.19727	0.036133	37.981	8.378	11.0611	0.29443	-0.29004	0.044922	55.149	-91.46	1295.107	-1.2769	0.81348	-0.83154
1.472	15.713	17.1169	32.4409	-0.1294	-0.0081046	0.0040042	-16.13397	91.553	73.7922	-0.099609	-0.20264	0.039551	29.6562	-11.0369	13.897	0.28906	-0.30469	0.029785	40.1272	-181.131	1280.26	-1.2476	0.67314	-0.8419
1.474	-1.819	14.9353	22.1355	-0.15127	0.01963	0.010254	-24.1928	42.9034	51.137	-0.089844	-0.20459	0.043457	21.553	13.8377	3.354	0.33496	-0.31299	0.035156	48.907	-283.679	1287.025	-1.2448	0.56846	-0.82832
1.476	-8.723	16.67041	3.25846	-0.16494	0.050391	0.010644	-5.467	85.197	54.9404	-0.075195	-0.20898	0.051758	53.8123	-1.394	3.7897	0.40943	-0.33203	0.042724	64.635	-302.36	1355.409	-1.2839	0.51143	-0.80332
1.478	-9.336	20.5133	5.9293	-0.17383	0.07666	0.0083008	8.2468	58.5572	41.2942	-0.066162	-0.2124	0.054443	48.9521	-1.4635	14.2783	0.48145	-0.3584	0.045898	20.507	-303.7	1387.4201	-1.3704	0.50176	-0.77178
1.48	-0.134999999999998	20.0283	7.05847	-0.17549	0.098142	0.0098633	9.264	32.6486	52.3706	-0.064941	-0.21582	0.058594	-2.5295	-31.04	1.12177	0.54492	-0.39453	0.015625	-4.146	-260.252	1390.6181	-1.5078	0.54297	-0.74414
1.482	-16.506	7.2796	3.7039	-0.17353	0.11319	0.010547	1.0408	64.111	43.024	-0.066895	-0.21387	0.056152	-0.716000000000001	-13.2785	3.6656	0.55322	-0.3999	-0.0043945	-54.4465	-272.222	1384.384	-1.6953	0.62422	-0.74238
1.484	-36.237	-2.8442	9.174	-0.1626	0.12491	0.013281	12.227	2.9937	41.778412	-0.062988	-0.21338	0.060059	-20.609	4.7666	-11.8031	0.53662	-0.38184	-0.04834	-52.8	-282.126	1406.047	-1.893	0.72656	-0.75313
1.486	-34.6853	6.0634	9.451	-0.14668	0.13027	0.01582	8.014	13.7088	35.1633	-0.056641	-0.21973	0.067871	-1.559	22.6182	-2.023	0.52319	-0.34741	-0.077637	3.616	-245.391	1459.997	-2.0746	0.83868	-0.77344
1.488	-23.477	19.8977	15.397	-0.13281	0.12451	0.02002	24.1874	25.3074	23.76	-0.056641	-0.21533	0.07666	1.103	30.375	-26.798	0.5083	-0.31445	-0.10107	38.619	-166.5138	1508.465003	-2.2122	0.95342	-0.78935
1.49	-19.431	22.603	17.5478	-0.11094	0.1123	0.024902	33.0506	-19.3398	27.5843	-0.054199	-0.21729	0.081543	3.636	22.2123	-30.2431	0.48438	-0.27148	-0.11865	75.9569	-93.905	1559.635	-2.3022	1.0601	-0.80225
1.492	-35.431	9.789867	27.314	-0.087793	0.10156	0.028808	18.1383	27.4158	20.393	-0.061035	-0.21143	0.089355	-3.7688	25.1196	-40.58	0.47754	-0.24902	-0.12256	64.1529	-60.323	1542.505	-2.3341	1.1502	-0.81739
1.494	-31.482	10.3125	13.4976	-0.06709	0.080469	0.031152	28.18	9.0335	13.5288	-0.069092	-0.2019	0.095459	-8.221	12.863	-14.01231	0.46191	-0.21582	-0.11816	77.704	-36.506	1500.997	-2.3124	1.2204	-0.83662
1.496	-1.199	12.44	-3.7847	-0.048535	0.059961	0.037207	38.238	-16.9026	0.808	-0.073242	-0.19629	0.099121	-26.5933	26.3342	2.1654	0.4375	-0.18701	-0.11084	90.5962	-60.919	1487.725	-2.253	1.2688	-0.86709
1.498	-10.541	26.7857	-0.52244	-0.023438	0.027344	0.038086	20.3626	30.154	-6.95392	-0.07373	-0.18018	0.10986	-25.454	19.086	19.9366	0.4165	-0.17041	-0.10889	119.9034	-69.922	1479.1523	-2.1648	1.2986	-0.89521
1.5	-25.9393	9.8976	16.934	-0.004785	0.005664	0.043164	24.3235	-15.39017	-0.95642	-0.079102	-0.17139	0.11719	-21.665	30.3934	-3.7445	0.37109	-0.13379	-0.10547	83.184	-106.329	1479.46	-2.0684	1.3145	-0.92188
1.502	-4.654	11.548	24.6438	0.013379	-0.023535	0.043945	27.4078	12.624879	7.8666	-0.072266	-0.15869	0.12695	-25.3473	21.2094	-0.529	0.33496	-0.096191	-0.10205	-6.872	-104.494	1457.827	-1.9782	1.3089	-0.94229
1.504	16.605	21.6686	4.434	0.032911	-0.047363	0.04707	4.059	22.5527	1.9366	-0.070069	-0.14966	0.12744	-28.57	49.177	2.4688	0.30713	-0.064941	-0.095703	-13.3761	-103.849	1412.205	-1.907	1.2892	-0.95381
1.506	24.353	23.8465	7.2544	0.051367	-0.067285	0.04668	10.0639	-16.8818	6.96793	-0.061035	-0.13379	0.12891	-20.8	33.5473	31.1968	0.2876	-0.0053711	-0.092773	0.840999999999994	-122.622	1457.048	-1.8632	1.2548	-0.96084
1.508	27.296	6.9368	15.62197	0.06543	-0.090332	0.042969	33.251	22.7503	2.49688	-0.04541	-0.12793	0.12744	-44.387	53.287	8.2326	0.28418	0.019043	-0.086914	57.986	-93.858	1477.735	-1.8436	1.2032	-0.95108
1.51	15.748	-2.71275	27.658	0.075489	-0.10469	0.040527	-15.4858	2.042102	-8.8732	-0.027344	-0.12354	0.13232	-18.7092	16.0538	5.8054	0.25928	0.060059	-0.077637	79.936	-106.694	1510.364	-1.8433	1.1489	-0.93506
1.512	26.837	10.017	4.6671	0.081738	-0.12226	0.031739	0.253	-11.8361	-0.3871	-0.0039063	-0.12402	0.12402	-8.774	26.3642	-15.674	0.22607	0.10547	-0.082032	94.113	-95.893	1493.393	-1.8617	1.1052	-0.91201
1.514	35.5842	20.2723	-4.32507	0.089942	-0.13477	0.030175	-2.3915	29.287	-20.5426	0.019775	-0.12329	0.11499	28.211	0.838	42.1621	0.19092	0.15332	-0.091309	58.645	-62.848	1466.526	-1.8925	1.0642	-0.88506
1.516	32.7232	15.5264	11.63486	0.095801	-0.1419	0.024219	-11.0566	-12.8557	-3.94026	0.041504	-0.12305	0.10059	25.522	24.9585	32.5201	0.15039	0.2251	-0.10059	72.96	-18.9252	1468.27	-1.9233	1.0317	-0.85811
1.518	25.7617	9.31965	13.8097	0.10059	-0.15137	0.017578	-22.0872	-0.4246	7.7226	0.071777	-0.1333	0.087891	16.5757	20.1503	53.957	0.13281	0.25879	-0.10596	125.914	17.927	1463.5836	-1.943	1.0117	-0.82695
1.52	29.407	26.437	5.6252	0.10137	-0.15693	0.016406	-0.6148	3.76244	3.1725	0.081543	-0.13672	0.07959	16.041	42.253	32.941	0.11133	0.32227	-0.10986	111.739	30.1717	1424.788	-1.9375	0.99902	-0.80469
1.522	30.004	25.39	15.8961	0.10166	-0.16368	0.010059	-14.1676	-30.87	19.3739	0.10205	-0.14746	0.05957	27.1112	10.00515	17.3819	0.096192	0.35669	-0.10742	104.296	11.851	1353.392	-1.8994	0.99004	-0.78594
1.524	3.825	12.2455	40.1479	0.1001	-0.16836	0.003418	-8.7566	12.6802	9.2719	0.11011	-0.1499	0.045166	28.101	16.97974	7.991	0.081055	0.38867	-0.10742	50.1326	4.0057	1305.434	-1.8418	0.98359	-0.77314
1.526	26.2692	-9.6489	55.0968	0.094043	-0.16738	-0.0041016	-8.13959	0.393	-7.5017	0.11328	-0.15137	0.02832	34.0838	-9.02	32.219	0.060059	0.42676	-0.09668	8.503	68.491	1276.919	-1.7672	0.97383	-0.76104
1.528	-13.8477	-20.9869	63.358	0.085938	-0.16797	-0.0073242	-39.8173	-6.9933	4.367	0.11182	-0.15186	0.01416	37.158	17.6659	10.2586	0.043945	0.43555	-0.098633	37.617	98.871	1304.071	-1.6963	0.95703	-0.74492
1.53	-27.4388	1.668	75.0216	0.079882	-0.16582	-0.016894	-6.5625	39.189	-10.0674	0.10645	-0.14844	0.0063477	28.5215	-8.395	36.352	0.019043	0.45313	-0.08252	34.571	137.001	1300.494	-1.6309	0.93555	-0.72656
1.532	4.425	26.4733	110.817	0.074414	-0.16074	-0.024121	-17.981	-13.1681	-15.4491	0.09375	-0.1416	-0.0092773	0.628999999999998	-9.2692	6.8838	-0.0051268	0.45898	-0.066162	39.17581	110.189	1247.313	-1.5781	0.91446	-0.71289
1.534	38.714	45.426	134.1388	0.066211	-0.1541	-0.033496	3.797	15.4842	-0.2992	0.07666	-0.13819	-0.01709	-2.544	-35.2313	12.3067	-0.025391	0.46436	-0.050293	31.878	104.522	1201.0956	-1.5276	0.89052	-0.69463
1.536	3.734	39.294	153.097	0.059082	-0.14688	-0.047168	2.9107	27.0889	-15.0229	0.060059	-0.12402	-0.015625	18.417	1.343	-4.6355	-0.063477	0.46729	-0.029785	37.851	139.432	1158.483	-1.4831	0.86631	-0.67901
1.538	3.81	10.4851	223.7473	0.052246	-0.14453	-0.062988	13.405	-14.5702	4.70022	0.026855	-0.1001	-0.030762	14.5898	-17.6318	16.5566	-0.080566	0.46729	-0.021973	16.808	160.576	1182.059	-1.4319	0.84072	-0.66006
1.54	27.843	6.5423	296.3963	0.043261	-0.13291	-0.080761	27.0362	46.477	7.95129	0.016602	-0.089355	-0.03125	13.952	17.87953	-4.51491	-0.11621	0.45996	-0.0014648	44.059	197.987	1205.99	-1.3828	0.81836	-0.64355
1.542	30	-1.792	340.644	0.030762	-0.11553	-0.10088	13.09	22.7591	-16.9192	-0.012695	-0.05957	-0.033203	-0.1738	-4.7786	13.1273	-0.13794	0.4541	0.0056153	22.8978	158.266	1195.1425	-1.3343	0.79619	-0.6251
1.544	14.575	-10.461	333.91	0.01748	-0.094434	-0.12432	12.0873	2.453	7.139	-0.027588	-0.036865	-0.032715	-25.287	20.3003	-29.431	-0.15967	0.44385	0.01416	28.0272	134.404	1153.219	-1.2814	0.78135	-0.59824
1.546	7.623	-38.406	334.171	-0.0097658	-0.067871	-0.14522	21.8439	33.703	-2.43994	-0.038086	-0.013672	-0.031738	-20.0147	-6.35713	-18.0486	-0.17725	0.42236	0.019531	14.9712	124.01	1130.733	-1.2279	0.76143	-0.57598
1.548	3.715	-50.1099	354.552	-0.046875	-0.033203	-0.16602	16.6957	-19.6402	-1.513	-0.04834	0.015137	-0.024902	-7.29199999999999	14.7832	-22.3674	-0.17969	0.41016	0.021484	13.298	170.934	1098.907	-1.1782	0.74912	-0.55205
1.55	-3.3677	-24.949	388.5445	-0.092873	0.007324	-0.18886	18.5748	5.7291	12.74184	-0.049805	0.031738	-0.026855	-17.3998	-2.9692	3.7374	-0.17822	0.37549	0.016602	35.8804	205.049	1087.497	-1.127	0.73828	-0.53125
1.552	-22.222	-1.581	429.1339	-0.15254	0.050879	-0.20762	39.409	11.5521	-15.3198	-0.053711	0.05957	-0.033203	-14.461	24.784	21.48301	-0.16772	0.35205	0.018799	-27.1343	189.79	1031.198	-1.0734	0.72304	-0.49922
1.554	-9.3912	11.59826	483.9537	-0.21973	0.10166	-0.23067	18.18327	-16.8724	8.77086	-0.048096	0.07837	-0.036622	-42.23	-1.4831	23.8687	-0.15137	0.32422	0.0043945	-30.1589	148.06	994.574	-1.0195	0.70977	-0.475
1.556	0.59563	22.402	538.1246	-0.29551	0.14932	-0.25244	15.3463	18.5911	9.54764	-0.041504	0.099121	-0.041992	-35.9347	-12.902	36.678	-0.12549	0.28027	-0.026855	-22.9492	106.943	936.558	-0.96484	0.69883	-0.44375
1.558	-21.6219	33.219	558.4485	-0.37109	0.19629	-0.27734	31.805	3.30145	-6.575	-0.025879	0.11963	-0.038574	-26.064	-37.194	50.212	-0.10986	0.25732	-0.043457	7.541888	144.495	889.6363	-0.91221	0.68974	-0.41748
1.56	-4.668	26.679	594.01	-0.45488	0.25215	-0.30537	12.616	-2.0678	8.498	-0.015137	0.13135	-0.043945	-10.589	-29.91	86.156	-0.094727	0.21484	-0.09082	17.6865	188.0158	866.5011	-0.86475	0.68018	-0.38818
1.562	31.992	15.9467	643.974	-0.53916	0.31787	-0.33408	21.59917	37.753	10.7831	-0.00048828	0.14209	-0.049805	-20.5296	-26.305	121.5523	-0.087402	0.19654	-0.11499	-4.0886	232.509	821.4524	-0.81357	0.66748	-0.36446
1.564	13.461	9.5563	666.388	-0.62862	0.38779	-0.36025	-7.5352	-1.2938	10.0891	0.013672	0.1504	-0.054199	-0.291	-0.407000000000004	153.747	-0.10059	0.18506	-0.14795	-10.1793	233.797	772.3604	-0.76211	0.65136	-0.34004
1.566	-18.3844	6.023	655.651	-0.7251	0.46728	-0.38545	2.768	20.2831	11.2251	0.025391	0.15283	-0.060547	-10.02227	-7.638	201.221	-0.14453	0.17139	-0.18164	-6.376	245.155	716.7633	-0.7082	0.63965	-0.30918
1.568	-0.2019	-10.151	676.6199	-0.81592	0.54785	-0.40967	-6.2733	34.1458	-2.5757	0.050293	0.15088	-0.066895	-13.6553	-12.306	297.234	-0.18164	0.16992	-0.19287	20.2249	274.73	666.169	-0.66475	0.62783	-0.28418
1.57	13.9012	-26.086	722.30448	-0.90898	0.63867	-0.43398	-14.3632	-7.4911	0.3413	0.060547	0.14746	-0.070313	-30.19	-3.4545	371.0443	-0.27344	0.17822	-0.21143	40.118	264.286	660.277	-0.62109	0.60938	-0.26514
1.572	38.65342	-51.324	748.6468	-0.98936	0.72666	-0.44355	-13.7853	26.8389	15.18706	0.078613	0.13916	-0.07373	-27.82429	22.835	482.484	-0.3584	0.18628	-0.21387	11.1717	255.9218	618.14	-0.58115	0.59033	-0.2414
1.574	24.5286	-74.4438	745.094	-1.0616	0.81846	-0.45567	-14.6863	-9.3708	-10.1713	0.097412	0.12988	-0.079102	-31.318	63.84483	575.757	-0.44727	0.19336	-0.21533	-42.1007	202.183	567.8386	-0.53857	0.57041	-0.2167
1.576	7.211	-105.063351	773.204	-1.1276	0.9001	-0.46552	-5.811	-14.7663	9.00339	0.10547	0.11963	-0.088867	-17.1612	79.262	678.661	-0.58496	0.20068	-0.22217	-51.608	165.65	504.3832	-0.50108	0.54775	-0.19092
1.578	-16.832	-122.1476	827.6601	-1.1895	0.97266	-0.47266	-14.1177	23.625	-2.2434	0.1167	0.097168	-0.092773	-50.924	64.582	758.474	-0.66455	0.19385	-0.22656	-26.4123	141.682	465.728	-0.46455	0.52139	-0.17197
1.58	-11.501	-126.841	886.916	-1.235	1.035	-0.47471	-15.92291	-14.6196	-0.5319	0.11914	0.088867	-0.096191	-60.951	27.1688	835.2418	-0.86279	0.1958	-0.21729	-29.752	151.6915	453.46	-0.43115	0.49756	-0.14746
1.582	-36.6003	-123.268	923.163	-1.2636	1.0907	-0.47646	-4.996	4.9362	19.3936	0.12061	0.075684	-0.10205	-64.693	2.819	909.3185	-1.0556	0.19946	-0.20874	-21.0856	177.989	407.833	-0.4001	0.46719	-0.12773
1.584	-29.298	-110.569	941.0205	-1.2714	1.136	-0.4749	-5.7036	12.3256	-0.5861	0.11547	0.05957	-0.1001	-31.0363	-37.439	1017.637	-1.269	0.22656	-0.20459	-48.788	184.14096	358.533	-0.37685	0.44112	-0.10967
1.586	-6.724	-94.953	981.2028	-1.2765	1.1435	-0.47803	-10.0996	-21.2143	15.9709	0.1123	0.049805	-0.10889	2.019	-62.449	1066.075	-1.5718	0.32666	-0.18896	-72.791	208.485	319.853	-0.35772	0.41416	-0.090918
1.588	-25.259	-86.846	1001.9543	-1.2974	1.144	-0.48486	2.2893	7.0154	14.2067	0.099121	0.032715	-0.11328	42.2408	-85.475	1075.811	-1.7163	0.39111	-0.16113	-30.59716	197.032	320.3418	-0.3417	0.37871	-0.069727
1.59	-48.5708	-76.7969	1028.3987	-1.3164	1.1539	-0.49023	-4.5681	0.1893	-0.0630000000000006	0.096191	0.026855	-0.11914	45.44	-120.028	1036.238	-2.0039	0.54297	-0.081055	-6.4097	190.326	321.5924	-0.32861	0.354	-0.053223
1.592	-13.879	-82.409	1080.136	-1.3328	1.156	-0.49405	-1.93	-14.59478	19.8642	0.077637	0.011719	-0.12256	52.658	-174.248	1040.098	-2.2048	0.66674	-0.01709	-6.491	147.822	296.3173	-0.31738	0.32852	-0.041894
1.594	20.8175	-76.322	1110.229	-1.3394	1.1454	-0.49209	24.5693	18.5001	0.8003	0.064697	0.001709	-0.13208	63.307	-191.294	1041.9966	-2.3823	0.78955	0.036621	-38.462	148.898	264.073	-0.31455	0.3041	-0.033692
1.596	-2.144	-88.676	1110.26802	-1.3343	1.1184	-0.49649	-7.0764	-11.8119	7.084	0.039063	-0.0083008	-0.14941	84.534	-217.944	1065.031	-2.5249	0.91748	0.073242	-60.744	160.895	202.251	-0.31104	0.28105	-0.016113
1.598	-25.0172	-85.793	1125.9022962	-1.3198	1.0825	-0.50928	15.1922	-28.64398	51.3535	0.0073242	-0.0097656	-0.18115	118.448	-220.651	1029.9268	-2.543	0.97656	0.067871	-88.071	176.532	195.809	-0.30752	0.26123	-0.0090818
1.6	7.514	-73.2531	1141.5455	-1.2872	1.0315	-0.51377	43.08	-27.4702	56.1118	-0.0097656	-0.0087891	-0.18799	91.364	-236.626	1061.384	-2.4727	1.0469	0.011719	-37.456	184.499	167.776	-0.30566	0.24951	-1.3323e-13
1.602	16.206	-44.782	1178.98	-1.2473	0.97578	-0.53477	-12.14769	-74.0515	81.48	-0.060059	0.0073242	-0.20801	49.369	-242.114	1063.9543	-2.4109	1.0774	-0.078368	-22.4723	130.5823	162.542	-0.30166	0.24336	0.002832
1.604	-2.332	-26.3989	1209.886	-1.1973	0.93203	-0.56328	26.636	-27.7284	128.5431	-0.11011	0.015869	-0.22095	26.217	-231.4817	1087.0792	-2.3359	1.1113	-0.15674	-42.196	123.7852	112.094028	-0.30166	0.24834	0.0023437
1.606	-18.476	-43.365	1246.9207	-1.1652	0.91153	-0.59141	34.9483	-28.4778	152.0508	-0.16455	0.028809	-0.23633	42.711	-205.189	1081.404	-2.2026	1.1577	-0.229	-38.16	82.452	96.222	-0.29853	0.25224	0.011328
1.608	5.887	-45.865	1290.379	-1.1436	0.90625	-0.62695	19.981	-29.0969	205.274	-0.25781	0.040039	-0.24805	59.9434	-186.19	1121.763	-2.1343	1.1704	-0.24902	-22.254	80.382	76.616	-0.28936	0.25303	0.023242
1.61	22.033	-36.925	1296.021	-1.1405	0.93076	-0.6582	59.9466	10.844	243.1115	-0.30664	0.049805	-0.25488	78.621	-165.534	1138.439	-2.0156	1.1602	-0.271	11.5894	65.6313	82.956	-0.28076	0.24951	0.035156
1.612	14.194	-33.2961	1301.266	-1.1653	0.97109	-0.68789	37.922	-4.708	290.855	-0.38965	0.071289	-0.26025	88.477	-169.42	1202.8206	-1.9627	1.1077	-0.28784	30.45723	37.028	74.256	-0.26865	0.24521	0.049121
1.614	41.733	-42.124	1318.91	-1.2086	1.0191	-0.71094	12.901	45.836	361.5075	-0.45557	0.085693	-0.25171	103.3564	-179.532	1220.889	-1.9316	1.0391	-0.3125	37.5413	1.4872	68.2617	-0.25918	0.24072	0.057031
1.616	58.5457	-40.501	1325.4553	-1.2451	1.0682	-0.7252	26.36024	90.492	412.4802	-0.53369	0.090332	-0.24854	82.3414	-207.7329	1280.047	-1.9355	0.94141	-0.33301	-13.2807	-6.495	53.612	-0.25489	0.22979	0.055469
1.618	64.1724	-33.291	1317.6446	-1.2832	1.1162	-0.73145	5.634	82.71	488.0226	-0.66602	0.12402	-0.25098	63.66	-243.591	1316.652	-1.9492	0.91016	-0.34521	13.2533	38.7064	55.19	-0.25234	0.21934	0.05459
1.62	53.679	-39.262	1316.789	-1.3337	1.1618	-0.73916	16.675	116.733	550.1653	-0.7373	0.14355	-0.24658	0.558999999999999	-276.24	1355.575	-2.0161	0.86377	-0.35303	15.5017	56.653	57.98795	-0.23926	0.20557	0.044434
1.622	66.598	-46.6844	1355.25303	-1.3956	1.2028	-0.75069	-2.4664	90.126	582.0494	-0.89014	0.17236	-0.23926	10.338	-266.658	1360.8055	-2.0923	0.85108	-0.35572	12.132	54.88	43.877	-0.23056	0.1956	0.043555
1.624	61.8752	-41.3709	1374.734	-1.4565	1.2505	-0.76631	-11.3186	52.293	646.6764	-1.0125	0.19995	-0.22583	28.3619	-248.827	1389.749	-2.1836	0.85156	-0.35596	51.845	-6.215	6.168	-0.22236	0.18262	0.047168
1.626	45.748	-26.8187	1346.3048	-1.5149	1.2911	-0.77842	13.628	65.11	684.29	-1.1426	0.22656	-0.20654	29.567	-209.327	1425.989	-2.312	0.87354	-0.35889	19.7013	-39.584	-43.7424	-0.21377	0.16621	0.044043
1.628	22.22	-23.3352	1341.9051	-1.5732	1.3379	-0.79492	14.173	10.766	715.8876	-1.3125	0.27734	-0.16357	6.033	-205.1319	1471.61	-2.3687	0.896	-0.34766	-7.1882	-67.716	-53.2081	-0.20752	0.15439	0.045703
1.63	8.54499999999999	-6.9761	1361.398	-1.6235	1.3792	-0.80713	33.346	-21.676	752.3576	-1.4705	0.33227	-0.12866	7.753	-181.495	1471.0777	-2.4883	0.94141	-0.34033	32.0605	-36.3481	-25.82	-0.20264	0.13916	0.047852
1.632	4.23399999999999	5.5973	1370.1627	-1.6649	1.418	-0.82227	53.2609	-48.141	757.076	-1.6211	0.39648	-0.078125	-6.394	-186.377	1486.7737	-2.5613	0.9905	-0.34424	35.07455	15.1741	-7.568	-0.20869	0.13379	0.049707
1.634	2.417	14.0041	1359.8136	-1.7031	1.4523	-0.84336	31.366	-130.362	761.91	-1.8848	0.48828	-0.040527	9.896	-130.36	1497.142382	-2.625	1.0449	-0.35498	16.1729	24.692	-5.977	-0.21514	0.13184	0.055371
1.636	15.245	15.83318	1354.3262	-1.7397	1.4821	-0.86553	25.4285	-123.1714	787.2891	-2.0151	0.5542	-0.028809	0.0519999999999996	-109.984	1516.015	-2.6934	1.125	-0.36963	8.4824	41.21532	-31.174	-0.22568	0.13262	0.071387
1.638	14.145	22.0206	1387.575	-1.7656	1.5059	-0.89258	8.4662	-127.8927	770.5261	-2.2593	0.69385	-0.025391	52.601	-40.488	1533.735	-2.7322	1.1878	-0.38526	-3.524	33.415	-22.4835	-0.23877	0.14589	0.085547
1.64	18.746	26.31	1381.91423	-1.7844	1.5197	-0.91192	4.015	-156.839	807.034	-2.4305	0.79028	-0.048096	19.807	-50.825	1519.303	-2.7598	1.2539	-0.4043	-21.91008	48.59148	4.4897	-0.2583	0.1626	0.10742
1.642	14.897	27.2682	1353.307	-1.7996	1.5313	-0.93164	16.38	-116.857	826.194	-2.5488	0.91992	-0.1084	-19.009	-41.06	1493.6672	-2.7676	1.3281	-0.4209	25.7358	45.0344	23.983	-0.26924	0.171	0.12061
1.644	32.821	25.084	1341.564	-1.8074	1.5351	-0.94648	-18.9896	-157.239	834.637	-2.521	1.0474	-0.16309	-41.2806	-110.659	1515.3758	-2.7554	1.3579	-0.42188	-2.4294	34.89	17.7889	-0.27539	0.18164	0.1456
1.646	44.708	15.4266	1374.4023	-1.8133	1.5297	-0.96289	-10.40892	-160.504	894.56	-2.4233	1.0737	-0.16553	-41.0168	-105.39166	1553.945	-2.7227	1.4004	-0.43311	-24.0749	-4.7073	-12.6819	-0.26875	0.18242	0.16319
1.648	25.639	3.7353	1398.581	-1.8101	1.5239	-0.96436	-6.6854	-142.7306	904.513	-2.1602	1.041	-0.15869	-33.0586	-113.793	1576.111	-2.6909	1.4053	-0.44287	-36.9184	-22.5833	-10.181	-0.24902	0.18359	0.18428
1.65	21.006	8.28	1359.1717	-1.8027	1.5083	-0.97061	-15.6541	-193.5702	925.76	-1.9629	0.99365	-0.17407	-1.4948	-80.39	1558.417	-2.6621	1.4023	-0.44922	-24.3727	0.698399999999999	-0.867000000000001	-0.21484	0.17188	0.19922
1.652	17.693	7.0664	1347.5163	-1.7886	1.4943	-0.97119	12.355	-172.329	980.2603	-1.7925	0.92627	-0.20166	-5.656	-102.02	1523.44	-2.6323	1.3794	-0.43896	-6.853	17.3701	12.7162	-0.15859	0.15059	0.21015
1.654	26.864	18.6593	1367.158	-1.773	1.4708	-0.96651	-3.507	-158.206	992.992	-1.6401	0.81494	-0.26025	-11.183	-90.813	1505.2011	-2.625	1.3672	-0.43799	1.9447	56.481	22.4791	-0.096875	0.12539	0.21534
1.656	19.211	28.0885	1347.215	-1.7518	1.4451	-0.96621	15.039	-168.404	1029.482	-1.5957	0.75391	-0.2959	-19.7586	-116.118	1510.1506	-2.6187	1.3364	-0.42773	-7.7258	22.07251	29.5395	-0.026953	0.090235	0.21768
1.658	26.335	49.9331	1313.27937	-1.7227	1.417	-0.96289	36.7978	-140.086	1051.9889	-1.5405	0.64893	-0.3374	39.7929	-78.2768	1507.2347	-2.6159	1.3078	-0.41455	-51.796	0.96	23.236	0.053614	0.051172	0.21113
1.66	53.598	45.2966	1300.7192	-1.6947	1.3861	-0.95762	7.2104	-160.442	1078.625	-1.5374	0.57642	-0.34253	34.8988	-85.745	1532.143	-2.6055	1.2773	-0.40332	-6.5479	-29.838	26.21	0.14014	-0.0019531	0.20313
1.662	56.885	53.421	1307.976	-1.6655	1.3474	-0.9542	21.772	-178.6539	1133.549	-1.5547	0.51318	-0.34277	48.777	-47.644	1539.992	-2.5933	1.2349	-0.37842	31.53	-25.1702	36.2664	0.23105	-0.054785	0.18135
1.664	90.5828	65.615	1305.189	-1.6366	1.313	-0.94638	16.46	-171.183	1190.1038	-1.6245	0.45459	-0.31982	19.8234	-42.298	1504.426	-2.5796	1.2134	-0.36768	29.035206	-2.0575	23.0004	0.32725	-0.11582	0.15986
1.666	85.5916	69.252	1277.4921	-1.611	1.2816	-0.93486	-16.448	-196.783	1240.023	-1.6831	0.43994	-0.30371	23.532	5.563	1452.662	-2.5562	1.1802	-0.34326	19.987	0.339	27.4797	0.45732	-0.19199	0.16689
1.668	94.385	70.437	1266.33632	-1.5859	1.25	-0.92383	-13.412	-187.758	1286.43	-1.8257	0.44971	-0.26563	21.84	25.738	1403.841	-2.5302	1.1533	-0.32812	-4.285	16.043	-2.367	0.58633	-0.27852	0.16182
1.67	83.1349	83.529	1270.52	-1.5682	1.2291	-0.91465	-31.676	-176.634	1289.732	-1.9522	0.48633	-0.24365	-6.502	58.156	1390.849	-2.5	1.1367	-0.31299	-19.9521	8.608	12.115	0.6499	-0.36865	0.13281
1.672	58.378	87.005	1238.7364	-1.5613	1.208	-0.89648	-24.717	-197.329	1320.6733	-2.0703	0.53418	-0.22168	12.399	44.263	1385.928	-2.4487	1.1177	-0.2915	12.273	19.0471	18.268	0.65088	-0.40508	0.084862
1.674	51.395	78.8105	1211.4261	-1.5609	1.1951	-0.88437	49.6135	-154.1264	1337.148	-2.1992	0.60645	-0.20117	12.227	56.8583	1368.5712	-2.4224	1.1099	-0.27881	46.6171	7.5574	31.615	0.60918	-0.41836	0.032519
1.676	51.902	72.433265	1185.70792	-1.563	1.1901	-0.87041	33.2954	-139.1012	1337.6028	-2.2515	0.64502	-0.19287	32.8015	48.9545	1340.729	-2.3589	1.0884	-0.26123	7.614	-5.8752	-6.212	0.5541	-0.4125	-0.01123
1.678	44.135	57.654	1182.1835	-1.5645	1.1836	-0.86328	60.0371	-146.7278	1375.6794	-2.3218	0.70752	-0.19189	28.72596	70.056	1329.2487	-2.3103	1.0716	-0.24292	6.6598	-15.586	-26.9237	0.54033	-0.37949	-0.028516
1.68	29.64	61.14	1161.356	-1.5682	1.1838	-0.84941	95.568	-104.476	1384.033	-2.3674	0.75122	-0.2041	17.246	69.726	1304.335	-2.2554	1.0493	-0.22461	1.1529	-18.8698	-35.6423	0.56494	-0.36035	-0.033203
1.682	32.134	64.8178	1133.5288	-1.5655	1.1817	-0.84151	53.38798	-120.8027	1384.08909	-2.4292	0.80322	-0.24805	-4.262	92.425	1281.017	-2.1675	1.0142	-0.21094	41.053	-9.8444	-18.75628	0.59434	-0.35371	-0.02793
1.684	24.833	73.3578	1124.0512	-1.5558	1.179	-0.83799	100.999	-100.561	1416.4811	-2.5093	0.89697	-0.30127	13.748	115.786	1258.437	-2.127	0.99316	-0.20898	59.912	-9.3756	9.207	0.60791	-0.34502	-0.028125
1.686	55.611	73.1473	1110.4889	-1.5427	1.1764	-0.82569	94.531	-56.397	1382.8554	-2.5308	0.94385	-0.32471	5.785	138.206	1291.111	-2.0313	0.94727	-0.19238	48.727	3.81	-2.417	0.60635	-0.32119	-0.032422
1.688	37.398	71.3359	1110.241	-1.5234	1.1719	-0.8125	61.4108	-79.6114	1411.5818	-2.5547	1.0117	-0.35986	36.52899	138.421	1281.892	-1.9626	0.90454	-0.1875	3.1185	10.239	-10.9145	0.58232	-0.28741	-0.034277
1.69	29.445	86.743	1082.596	-1.5023	1.1691	-0.79922	83.774	-39.3764	1420.38108	-2.5537	1.0508	-0.38867	-10.3654	105.1098	1270.949	-1.8901	0.85986	-0.18457	-19.045731	47.694	-12.90342	0.55029	-0.24902	-0.038086
1.692	16.965	102.458	1059.7559	-1.4701	1.1621	-0.78555	60.244	-37.0783	1401.6453	-2.5464	1.0786	-0.42334	-21.463	101.234	1224.286	-1.8003	0.79932	-0.17334	17.2766	48.678	13.887	0.51289	-0.20264	-0.03916
1.694	23.052	112.414	1023.1773	-1.4381	1.1465	-0.7707	57.395	-67.44	1462.5414	-2.5288	1.1001	-0.46436	-43.3197	89.1947	1191.932	-1.7539	0.76563	-0.16797	-5.936	39.927	6.893	0.47666	-0.15576	-0.043652
1.696	9.736	111.2958	995.5428	-1.4016	1.1309	-0.7582	88.8372	-48.0275	1465.7745	-2.5112	1.106	-0.47705	-6.746	133.477	1147.935	-1.6738	0.70898	-0.14893	11.8041	11.263	4.303	0.43447	-0.11436	-0.050684
1.698	-22.988	110.1313	978.06967	-1.3652	1.1133	-0.73584	58.4475	-91.233	1464.6308	-2.457	1.0879	-0.50391	-12.636	145.2763	1147.151	-1.6131	0.6687	-0.14136	-12.1384	-15.1252	-9.9998	0.39971	-0.068359	-0.060645
1.7	-18.82	107.7227	960.03443	-1.3225	1.0849	-0.71777	92.8691	-102.747	1498.228	-2.4051	1.0603	-0.51831	37.176	176.9	1085.757	-1.5601	0.62939	-0.12891	-40.051	-13.6727	-19.522	0.36084	-0.022461	-0.069824
1.702	-14.523	107.8233	940.7486	-1.2796	1.0599	-0.70069	113.921	-53.058	1454.641374	-2.3452	1.0181	-0.53076	21.9406	175.45385	1075.311	-1.478	0.58447	-0.12939	-24.7052	8.887	10.8385	0.32197	0.02002	-0.083594
1.704	-13.246	115.2087	925.2488	-1.2448	1.0313	-0.68076	88.233	-78.3142	1453.411	-2.2749	0.93994	-0.54053	27.4547	189.878	1016.0858	-1.4419	0.55713	-0.12354	14.415	46.2398	27.757	0.28379	0.069239	-0.088965
1.706	-1.696	108.74014	910.9091	-1.2042	1.0079	-0.6624	105.4169	-44.3636	1468.6782	-2.2437	0.89893	-0.54443	-8.334	181.6326	1003.026	-1.3589	0.51904	-0.11768	12.8858	44.0458	17.7124	0.25371	0.11495	-0.088965
1.708	9.024	116.438	878.68521	-1.166	0.97949	-0.64453	48.6727	-18.148	1415.112	-2.189	0.81494	-0.54736	30.09	223.395	969.633	-1.2993	0.48974	-0.1211	-15.71631	16.1535	2.723	0.2419	0.16221	-0.084863
1.71	38.7056	129.214	851.386	-1.1297	0.95547	-0.62431	54.918	-47.9112	1463.9963	-2.1658	0.76001	-0.54273	20.665	206.6852	966.119	-1.2339	0.46143	-0.11816	-7.4972	14.2212	-5.062	0.22754	0.20068	-0.070313
1.712	16.995	125.022	827.4631	-1.0968	0.93252	-0.60479	47.6864	0.9521	1461.158	-2.1479	0.71338	-0.5415	53.9884	215.448	900.732	-1.146	0.42725	-0.12158	-41.987	6.63725	24.1725	0.17451	0.2375	-0.056543
1.714	25.394	120.014	814.1715	-1.064	0.9083	-0.57979	4.075	2.4552	1433.936	-2.1387	0.66211	-0.53125	5.742	169.931	879.4	-1.103	0.40381	-0.12207	1.3697	4.0042	67.403	0.10244	0.29815	-0.049805
1.716	12.559	116.13	790.2645	-1.0385	0.88613	-0.56113	42.659	6.321	1442.1664	-2.1343	0.64209	-0.52588	35.9513	177.99301	805.9384	-1.0205	0.36719	-0.12012	17.1773	-3.46	64.64	0.030957	0.36259	-0.044336
1.718	29.0895	126.553	774.24933	-1.0151	0.86963	-0.54932	28.422	63.5474	1398.003	-2.1387	0.61865	-0.51221	12.445	170.619	790.2756	-0.95801	0.34399	-0.11767	-7.638	-9.2286	10.1548	-0.030566	0.42813	-0.038379
1.72	19.5306	125.97006	755.7177	-0.99209	0.86064	-0.52803	30.455	32.6882	1384.952	-2.1414	0.61011	-0.50049	58.243	198.325	737.654	-0.896	0.31982	-0.11572	11.1164	-27.4349	-11.287	-0.075684	0.48877	-0.019043
1.722	9.043	129.8878	739.854	-0.96944	0.84873	-0.51006	57.211	56.198	1401.88942	-2.1426	0.61133	-0.48438	40.089	183.513	697.5039	-0.82031	0.28516	-0.11133	-0.674000000000003	6.445	4.698	-0.11621	0.52715	-0.010938
1.724	4.175	127.9719	706.292	-0.94716	0.83037	-0.50576	54.787	63.758	1362.061	-2.1426	0.61914	-0.46289	70.907	196.1138	650.9748	-0.7793	0.27295	-0.11816	-2.756	12.44628	17.99	-0.14805	0.56651	0.0019531
1.726	5.174	129.57338	671.2442	-0.92022	0.81416	-0.49502	71.5409	6.743	1387.9235	-2.1348	0.62695	-0.45508	65.4861	159.194	625.2366	-0.70117	0.23633	-0.11621	22.8725	-1.088	30.4645	-0.17539	0.58643	0.0070313
1.728	19.325	115.8464	655.7793	-0.89014	0.79541	-0.47803	103.4848	42.239	1382.386	-2.1245	0.64893	-0.43848	74.0791	160.8593	580.052	-0.64161	0.21534	-0.11011	44.767	-0.77961	0.761000000000001	-0.19424	0.60088	0.0082031
1.73	4.382	108.3309	641.48814	-0.86055	0.7789	-0.46338	35.943	25.4387	1343.8806	-2.1072	0.65429	-0.42603	28.636	159.594	556.411	-0.58154	0.19287	-0.11572	3.3764	-31.6771	-17.25	-0.20508	0.60645	0.0078125
1.732	10.307	117.9432	597.5198	-0.8295	0.75957	-0.4539	85.1465	10.5798	1337.5158	-2.082	0.66992	-0.41504	51.9962	195.703	521.837	-0.50781	0.1582	-0.1167	26.5483	-17.3453	-18.2769	-0.204	0.60166	0.00058594
1.734	18.798	122.596	564.5966	-0.79473	0.74121	-0.44141	83.4437	58.5764	1296.7701	-2.0371	0.67383	-0.40039	39.574	196.6283	479.1677	-0.4707	0.14209	-0.11328	34.7833	3.0185	1.015	-0.1916	0.58692	-0.018359
1.736	19.3432	120.106	551.2862	-0.75664	0.71797	-0.43183	42.927	17.267	1278.92526	-2.0112	0.67822	-0.38818	53.451	205.8	429.6762	-0.40039	0.1123	-0.11719	40.3614	38.613	-2.324	-0.16504	0.56738	-0.041016
1.738	-15.1155	126.464	525.3595	-0.71924	0.69971	-0.41797	87.29392	30.089	1282.613	-1.9546	0.66846	-0.37744	25.647	188.7675	372.01	-0.34546	0.090088	-0.12036	36.954	28.377	-3.995	-0.11953	0.54033	-0.071973
1.74	-18.1775	133.819	510.4011	-0.67969	0.67939	-0.40947	60.5097	62.3501	1246.913	-1.9077	0.66431	-0.36182	33.793	200.05	367.118	-0.2998	0.066895	-0.12061	1.6063	5.6303	-10.9393	-0.062988	0.5083	-0.10986
1.742	-14.773	132.578	485.73687	-0.64326	0.66103	-0.39717	69.7947	12.673	1247.942	-1.855	0.65674	-0.34814	25.564	172.889	326.406	-0.23535	0.041992	-0.12305	-0.6472	-1.6671	19.997	-0.0057616	0.46651	-0.15762
1.744	-32.17632	108.997	477.9499	-0.60537	0.63643	-0.3874	86.11753	74.1242	1223.053	-1.7852	0.64209	-0.32861	26.97	164.376	317.155	-0.2168	0.029785	-0.12842	-4.4467	-27.8212	57.47	0.050879	0.42344	-0.20742
1.746	-30.0728	100.5356	465.76629	-0.57529	0.61572	-0.37568	58.334	73.708	1147.2537	-1.7505	0.63525	-0.32031	12.528	165.271	285.6834	-0.18018	0.0092773	-0.13037	34.1423	-38.173	96.022	0.10166	0.37226	-0.27031
1.748	-52.301	106.7466	435.8019	-0.54541	0.59131	-0.36768	99.547	72.8156	1122.1232	-1.6836	0.61914	-0.30371	30.493	168.059	273.8016	-0.15063	-0.019531	-0.12524	-20.105	-46.908	104.565	0.1293	0.32734	-0.33721
1.75	-33.0078	120.794	402.032	-0.51612	0.57978	-0.35615	84.587	136.979	1060.9345	-1.624	0.60645	-0.29223	44.723	165.769	234.3421	-0.11572	-0.046387	-0.11133	-51.554	-33.87	180.085	0.14258	0.29785	-0.40039
1.752	-24.717	112.615	390.8029	-0.48643	0.55556	-0.34366	53.4347	84.8262	1046.2706	-1.5718	0.59424	-0.27588	38.002	162.876	227.702	-0.076172	-0.094238	-0.084473	-41.1959	-56.943	300.623	0.12324	0.27734	-0.46719
1.754	-38.4126	115.45	362.71283	-0.45752	0.53017	-0.3331	111.172	108.746	1046.363	-1.502	0.57813	-0.25879	-1.932	162.257	187.5891	-0.056152	-0.11084	-0.073242	-74.174	-60.1162	460.832	0.070801	0.2747	-0.5292
1.756	-37.2929	103.46	345.5209	-0.42793	0.50459	-0.31982	30.482	119.699	998.5819	-1.4673	0.57666	-0.23633	5.064	155.003	206.49	-0.037109	-0.146	-0.05957	-77.5096	-59.55	631.449	-0.019043	0.28838	-0.58232
1.758	-27.86758	98.054	337.4575	-0.3999	0.48584	-0.30957	23.496	75.487	992.1488	-1.3999	0.56494	-0.22656	-3.339	144.09	171.936	-0.021485	-0.16626	-0.057373	-135.1458	-59.381	774.4351	-0.1417	0.31846	-0.6251
1.76	-15.2757	82.758	316.7669	-0.37588	0.46182	-0.29502	57.6066	129.2776	980.593	-1.3545	0.56055	-0.21118	13.6148	117.5745	165.309	-0.0073242	-0.17969	-0.061523	-159.62141	-42.698	851.379	-0.28125	0.36133	-0.6543
1.762	-26.0799	86.667	311.418	-0.34824	0.44023	-0.28213	-19.058	104.974	925.6518	-1.3086	0.55859	-0.2002	30.558	105.8251	135.434	0.0063477	-0.18652	-0.058594	-213.555	-52.62	933.797	-0.43232	0.4124	-0.67676
1.764	-0.716000000000001	99.543	281.2969	-0.32207	0.42227	-0.27158	13.694	108.634	931.756	-1.2539	0.5498	-0.18018	10.66	90.01184	125.789	0.0092773	-0.19434	-0.061035	-109.374	-37.434	1007.653	-0.5832	0.47851	-0.67246
1.766	-17.149	92.0385	269.9027	-0.29952	0.40391	-0.25967	20.5216	155.9183	870.9215	-1.2305	0.55225	-0.17188	11.929	100.121	89.857	0.018066	-0.19141	-0.061035	-17.6434	-65.985	1078.49	-0.75195	0.56289	-0.62559
1.768	-2.124	99.403	265.7232	-0.27539	0.38623	-0.25146	-24.5978	98.262	821.641	-1.1699	0.54834	-0.15234	6.548	84.817	93.687	0.020752	-0.18848	-0.064453	15.681	-85.60119	1108.274	-1.025	0.6334	-0.53437
1.77	-6.087	104.371	235.594	-0.25303	0.36875	-0.2417	27.215	138.256	836.2915	-1.1172	0.53711	-0.13184	20.485	83.764	53.4523	0.023438	-0.18213	-0.062988	47.771	-90.778	1101.776	-1.3926	0.72168	-0.45313
1.772	-11.412	103.638	228.298	-0.2253	0.35537	-0.22959	-21.9573	145.559	776.4272	-1.0894	0.52783	-0.12793	29.6993	46.55	83.068	0.017578	-0.17578	-0.054199	42.827	-117.343	1096.619	-1.8284	0.81924	-0.4249
1.774	8.7313	93.149	231.843	-0.20576	0.34248	-0.21045	11.447	120.903	769.468	-1.0337	0.51221	-0.11475	44.337	49.077	52.429	0.019043	-0.17139	-0.048828	71.552	-148.919	1082.0951	-2.2508	0.94726	-0.396
1.776	13.292	75.3846	218.109	-0.18603	0.33379	-0.20273	44.5594	178.331	748.006	-0.99779	0.50171	-0.10937	27.5235	28.278	44.02	0.010742	-0.16504	-0.025391	94.3331	-213.796	1085.7868	-2.6086	1.1066	-0.32021
1.778	8.196	71.864	197.1929	-0.16211	0.32129	-0.19189	-17.1857	137.7043	699.969	-0.95996	0.49023	-0.10303	4.333	37.2799	10.7497	0.00073245	-0.15137	-0.015381	141.319	-281.218	1076.8833	-2.8629	1.2727	-0.22178
1.78	21.13	65.871	168.6897	-0.1417	0.30566	-0.17646	3.056	145.7522	685.4709	-0.89209	0.47021	-0.077148	-1.312	10.612	19.8363	-0.010254	-0.14551	-0.0019531	102.99998	-289.6117	1114.007	-3.0068	1.416	-0.14502
1.782	21.807	51.4783	163.1313	-0.11797	0.29277	-0.16387	-5.2219	189.5708	637.1511	-0.86719	0.45459	-0.064453	7.447	13.3465	16.264	-0.031738	-0.12793	0.021484	69.332	-247.698	1137.498	-3.0163	1.5064	-0.12393
1.784	-0.393000000000001	56.6042	160.170166	-0.09961	0.27559	-0.15059	-45.0317	152.0292	608.177	-0.81201	0.43408	-0.063477	6.017	-13.145	26.9227	-0.052002	-0.11597	0.036866	90.796	-174.216	1130.272	-2.9351	1.5722	-0.14355
1.786	8.891	66.565	133.6763	-0.079688	0.26104	-0.1376	5.346	200.148	575.644	-0.76831	0.41015	-0.056396	24.617	1.4205	-9.6715	-0.068848	-0.10107	0.054199	133.35	-146.123	1139.717	-2.768	1.6238	-0.18457
1.788	31.5243	68.098	121.9226	-0.063965	0.24561	-0.12793	-11.4559	186.5257	536.276	-0.72656	0.39453	-0.04834	6.5387	-8.7756	0.9025	-0.085449	-0.083496	0.074219	195.848	-164.484	1169.416	-2.5401	1.6513	-0.22959
1.79	2.356	63.507	127.289	-0.04541	0.23213	-0.11494	-0.0600000000000005	148.873817	526.6157	-0.67529	0.37256	-0.041504	-4.935	8.0707	-4.6759	-0.093262	-0.071289	0.085449	175.682	-235.435	1224.548	-2.2969	1.6484	-0.2876
1.792	-2.551	63.096	108.24974	-0.031152	0.21719	-0.10117	36.525	186.617	504.151	-0.64844	0.3623	-0.037109	-23.9767	-5.7793	-3.818	-0.10254	-0.044434	0.10498	180.949	-266.069	1270.429	-2.0804	1.5931	-0.34639
1.794	-8.834	67.115	98.474	-0.019433	0.20352	-0.091015	-1.6865	142.3191	483.8394	-0.60059	0.33936	-0.032715	11.665	12.7999	-18.189	-0.1062	-0.035644	0.11816	146.775	-306.54	1321.815	-1.9077	1.5199	-0.4041
1.796	-6.782	54.8223	88.559	-0.0072264	0.18848	-0.085156	28.26	141.088	460.637	-0.57105	0.32373	-0.03247	-0.646	-15.6588	-8.1157	-0.10596	-0.02002	0.12646	129.242	-295.2724	1397.671	-1.8046	1.4245	-0.44316
1.798	-33.2988	46.6486	95.055	0.0073242	0.1748	-0.068359	33.9766	165.463	415.899	-0.53809	0.30811	-0.027832	6.021	4.331	-1.7452	-0.098633	-0.01709	0.14111	60.5177	-301.2247	1413.208	-1.7726	1.3336	-0.47871
1.8	-11.455	43.5889	89.1588	0.020215	0.15879	-0.0583	15.8832	123.0497	405.761	-0.49951	0.28516	-0.024414	-11.5145	-10.3112	17.8733	-0.089844	-0.021973	0.13916	60.0732	-335.036	1390.234	-1.814	1.2524	-0.49609
1.802	-9.2575	39.2591	59.9151	0.029883	0.1458	-0.05	32.56946	143.124	372.222	-0.4751	0.28271	-0.024414	-17.614	28.364	-13.1566	-0.073242	-0.029297	0.15088	66.54	-303.924	1388.44	-1.9169	1.2038	-0.50157
1.804	-14.462	43.22	40.9582	0.04082	0.13213	-0.038281	-13.8757	134.379	347.7372	-0.4375	0.26074	-0.02002	-26.323	24.585	-21.68147	-0.055176	-0.036377	0.15796	54.34665	-273.246	1432.493	-2.0566	1.1744	-0.50801
1.806	-20.89	48.208	41.725	0.050683	0.1247	-0.031445	7.1001	94.9045	342.9091	-0.40673	0.24511	-0.013183	1.826	43.48	-26.9533	-0.035156	-0.047363	0.16113	33.1135	-192.6487	1499.341	-2.2145	1.1713	-0.51855
1.808	-18.588	49.553	24.2105	0.05957	0.11475	-0.023926	3.2239	129.6127	316.326	-0.37988	0.21924	-0.0063477	-13.117	21.3207	-16.3532	-0.010742	-0.060547	0.16357	5.049	-156.0597	1531.227	-2.359	1.1989	-0.53125
1.81	-10.376	49.961	14.44988	0.069434	0.104	-0.01875	-43.411	103.8808	283.9186	-0.34668	0.20703	0.0083008	0.0120000000000005	46.6178	0.0107000000000004	0.0019531	-0.070801	0.16113	10.929	-132.402	1557.507	-2.4727	1.248	-0.53613
1.812	-21.164	37.44	27.8624	0.077539	0.095019	-0.011426	-0.2786	96.146	271.6904	-0.33154	0.19873	0.015137	12.995	34.3564	2.7594	0.024414	-0.086426	0.16162	-4.723	-132.581	1571.543	-2.5575	1.3182	-0.54033
1.814	8.616	25.7118	50.063	0.08418	0.084863	-0.0032227	-4.2141	126.9482	225.0783	-0.31396	0.18066	0.019531	0.151	54.466	8.25809	0.042725	-0.10303	0.16358	-51.091	-107.353	1589.19	-2.6141	1.3938	-0.54805
1.816	0.022000000000002	15.243	43.49	0.093457	0.070118	0.0054688	-37.792	83.3579	209.636	-0.29858	0.16992	0.027832	-18.215	26.816	29.463	0.055664	-0.11963	0.16211	-33.87762	-52.914	1612.912	-2.6406	1.4594	-0.56445
1.818	-11.28	25.3977664	38.9589	0.10596	0.059082	0.0097656	16.3347	98.6778	201.5625	-0.28467	0.16064	0.036133	-5.567	30.9924	18.5876	0.071289	-0.13721	0.15625	-67.441	0.340000000000003	1613.6214	-2.6403	1.5087	-0.58916
1.82	-3.902	28.3751	24.21137	0.1167	0.041699	0.017383	-40.204	99.014	162.8449	-0.25342	0.14404	0.044922	-6.832	14.5396	8.6768	0.07373	-0.14697	0.16113	-68.755	23.963	1591.8641	-2.6152	1.5488	-0.61523
1.822	13.505	26.8565	26.1285	0.12802	0.022265	0.025293	-37.247	76.595	162.9507	-0.24463	0.13672	0.050293	13.1892	31.62991	15.0823	0.077148	-0.15967	0.15918	-78.463	-46.8798	1592.7587	-2.5718	1.5641	-0.64287
1.824	8.814	26.2553	22.0045	0.13818	0.00078132	0.027636	13.5361	113.029	131.976	-0.21289	0.12451	0.057617	17.72	9.4807	19.04065	0.079345	-0.16529	0.16137	-64.3012	-69.9069	1563.57642	-2.5246	1.573	-0.65996
1.826	-10.864	14.920726	-2.5735	0.14805	-0.018262	0.031543	-66.439	75.777	114.456	-0.18677	0.10694	0.061035	18.988	22.56772	33.3765	0.086426	-0.1748	0.16064	-40.615	-111.46	1597.948	-2.4906	1.5719	-0.65957
1.828	44.5644	-4.2759	6.0737	0.15967	-0.043457	0.033203	-28.5224	79.486	109.3719	-0.16699	0.099121	0.0625	13.607	1.90405	10.9511	0.092773	-0.18213	0.16943	2.962	-103.342	1620.818	-2.4709	1.567	-0.65195
1.83	35.809	-6.1435	12.9143	0.16924	-0.065918	0.034277	6.458	95.2266	80.6083	-0.12646	0.090332	0.071289	7.624	16.0446	6.3131	0.094727	-0.18994	0.16504	-3.4468	-97.745	1637.201	-2.4624	1.5649	-0.63623
1.832	11.674	4.27232	10.907	0.17637	-0.085059	0.032325	-58.479	37.3168	81.0603	-0.11182	0.075684	0.07666	12.906	5.0077	17.7949	0.098633	-0.1958	0.1665	9.7608	-93.702	1646.094	-2.4629	1.5653	-0.62383
1.834	19.972	14.6287	8.02463	0.18457	-0.0999	0.033496	1.5775	51.2559	76.0595	-0.084961	0.058594	0.06543	21.2655	14.5701	38.947	0.09961	-0.19311	0.16333	50.102	-51.2347	1627.454	-2.4633	1.5692	-0.60488
1.836	18.826	16.8435	19.93528	0.18233	-0.11914	0.030762	-12.02358	36.254	53.476	-0.061768	0.050049	0.062012	10.935	11.3367	27.5274	0.094238	-0.19238	0.16113	79.7296	-27.3662	1624.0125	-2.4648	1.5769	-0.58301
1.838	14.884	25.235	15.5866	0.18018	-0.125	0.030273	7.3677	9.8997	48.206	-0.036621	0.037109	0.05957	11.5598	26.1109	32.4208	0.07666	-0.18652	0.14404	100.1212	9.7786	1607.36675	-2.4525	1.5775	-0.55996
1.84	-3.49	26.3079	19.528	0.17217	-0.13349	0.029004	34.0962	47.199	15.18531	-0.0058594	0.022461	0.059082	-5.319	-1.3532	0.996	0.074707	-0.17871	0.13916	81.2051	39.4118	1557.3606	-2.4316	1.5742	-0.53418
1.842	20.203	23.3022	21.43876	0.16055	-0.1333	0.026367	2.424	8.9	16.00388	0.0097656	0.010742	0.057129	-7.5487	6.6108	20.7962	0.0625	-0.16748	0.12793	67.706	45.466	1498.112	-2.4065	1.5576	-0.50137
1.844	-7.047	23.3283	16.2241	0.14297	-0.13448	0.024805	32.15616	1.1458	34.4094	0.036133	-0.01123	0.056152	-9.038	-4.9716	3.06	0.059571	-0.15113	0.12061	115.936	55.32705	1470.098	-2.3742	1.5211	-0.47149
1.846	25.986	20.3779	11.9291	0.1248	-0.13115	0.025098	17.6666	23.5169	-2.7593	0.05835	-0.025146	0.050537	17.399	2.3044	7.6119	0.060059	-0.13867	0.1123	131.512	72.7344	1458.113	-2.3309	1.4786	-0.43985
1.848	-3.933	8.9265	-0.2523	0.10742	-0.12256	0.027832	17.4196	-4.8243	23.3549	0.082031	-0.044434	0.047852	9.14100000000001	3.4267	-3.466	0.064941	-0.12598	0.10303	122.319	86.5923	1450.26	-2.2794	1.4169	-0.40166
1.85	-19.062	1.6455	7.3764	0.091993	-0.11797	0.02793	50.261	18.7591	7.2872	0.11328	-0.061523	0.052246	-1.3611	4.587	11.5365	0.059082	-0.11768	0.10107	100.634	116.8157	1418.928	-2.2168	1.3477	-0.37109
1.852	-14.097	3.9705	13.8711	0.078711	-0.10869	0.026465	4.31709	19.4517	-11.5606	0.125	-0.07373	0.053711	-17.573	-12.5788	-4.893	0.055664	-0.10938	0.083008	62.3486	169.274	1380.139	-2.144	1.2802	-0.34385
1.854	11.958	15.05938	9.8567	0.06582	-0.099707	0.026855	16.4144	-7.5701	5.71487	0.15137	-0.090332	0.048828	-18.3842	-22.6043	15.1235	0.053467	-0.10352	0.072998	55.4406	182.432	1353.115	-2.0682	1.211	-0.32178
1.856	-1.284	19.6489	7.8923	0.054688	-0.091211	0.022168	39.4304	30.7661	-20.663	0.16065	-0.1062	0.038818	-18.664	-10.272	-20.0194	0.054688	-0.097656	0.064453	34.7031	205.626	1345.117	-1.9902	1.1462	-0.3085
1.858	-33.322	17.8722	19.6922	0.05127	-0.081055	0.01709	-4.9997	7.5954	-25.5406	0.1626	-0.11426	0.046875	-8.60213	-0.99715	-4.9322	0.052246	-0.083984	0.049316	49.707	174.275	1356.235	-1.9105	1.0853	-0.29091
1.86	-7.269	16.24	15.31755	0.052148	-0.070117	0.015234	29.4028	11.326	2.746679	0.17139	-0.12793	0.044434	10.004	18.2129	-11.4653	0.053223	-0.080078	0.044434	40.4988	132.26821	1348.1043	-1.8301	1.0293	-0.28418
1.862	-19.694	14.7177	8.14441	0.052344	-0.058008	0.012012	22.9047	25.9851	-8.942	0.1792	-0.13232	0.043457	-10.8472	14.2931	7.3264	0.055664	-0.064941	0.03125	13.627	130.1131	1310.272	-1.7551	0.97539	-0.26699
1.864	-19.4576	25.6081	-8.8337	0.051562	-0.049805	0.0030273	6.1988	-13.4955	-5.2606	0.19287	-0.146	0.052246	-9.376	24.2489	-17.842	0.055176	-0.05957	0.029541	-24.0597	139.6621	1289.705	-1.6785	0.93359	-0.2541
1.866	-19.252	4.821	23.3498	0.052051	-0.040918	-0.0015625	34.9647	13.2072	-4.7313	0.20655	-0.15601	0.048096	4.361	9.6693	-6.956	0.058594	-0.049805	0.017578	-23.8118	211.205	1264.424	-1.6051	0.88516	-0.23848
1.868	-2.271	3.4197	29.726	0.052246	-0.033691	-0.003418	-18.215	17.4557	-15.234	0.22021	-0.16553	0.045898	-12.365	33.6921	-18.4262	0.062012	-0.044434	0.010254	-21.603	223.297	1254.163	-1.5344	0.83877	-0.229
1.87	5.066	15.4956	11.8064	0.054199	-0.022559	-0.0073242	-15.7469	-10.2458	-3.9808	0.23682	-0.1748	0.041016	16.3922	26.3135	23.6305	0.066895	-0.042969	0.0058594	-39.5566	208.513	1233.343	-1.4604	0.7915	-0.21924
1.872	-7.488	30.5689	-1.739	0.05459	-0.020411	-0.015528	10.925	21.2819	7.0176	0.24072	-0.17383	0.035156	-8.7	41.4933	-1.8865	0.072754	-0.039063	-0.0063477	-56.737	197.796	1167.522	-1.3941	0.74795	-0.20674
1.874	26.225	26.4023	7.7885	0.055371	-0.019239	-0.012402	-40.372	4.45733	5.699	0.25	-0.17969	0.028809	17.4272	29.007	-0.9235	0.076905	-0.03833	-0.017334	-30.3101	207.0388	1125.296	-1.3255	0.7126	-0.19492
1.876	16.124	21.5825	14.1147	0.063867	-0.017578	-0.011817	-11.6932	6.0625	15.1146	0.25732	-0.18066	0.021729	-8.436	45.7171	-21.2449	0.081543	-0.042969	-0.024902	-35.7488	232.0754	1079.372	-1.2583	0.6751	-0.18203
1.878	-6.091	29.1391	2.6943	0.068359	-0.01416	-0.011719	-13.13995	30.771	4.7206	0.26318	-0.18701	0.016602	7.137	20.0299	-4.3138	0.085938	-0.04834	-0.038086	-46.7543	242.0061	1031.0568	-1.1937	0.64297	-0.17315
1.88	6.715	14.0799	-9.18521	0.075879	-0.014844	-0.012109	-26.4775	-1.7524	3.4417	0.2627	-0.18848	0.017578	3.247	36.7192	-3.2012	0.083008	-0.05127	-0.049805	-14.586	225.585	975.8762	-1.127	0.60547	-0.16602
1.882	20.626	6.0191	9.4564	0.083105	-0.011914	-0.011914	-12.832	14.3331	1.507	0.26172	-0.19238	0.014648	18.85431	21.9172	9.546	0.081543	-0.061035	-0.062012	-39.905	218.17	904.5288	-1.0556	0.57569	-0.16338
1.884	24.5339	6.6234	30.7635	0.093262	-0.0072266	-0.013086	-25.6346	22.8873	-5.9209	0.2583	-0.19043	0.011719	14.227	49.869	12.286	0.080078	-0.067627	-0.075195	19.06	246.6936	861.249	-0.98242	0.53848	-0.16191
1.886	10.509	11.0515	16.6646	0.10234	-0.0016601	-0.016114	-9.2592	1.862	10.438	0.25586	-0.1875	0.014404	15.5907	21.74321	49.045	0.075684	-0.077148	-0.088379	47.5511	270.1231	856.619	-0.90586	0.50645	-0.16231
1.888	31.876	18.7066	7.53203	0.1084	0.0019531	-0.02002	5.3005	28.4552	1.9478	0.25439	-0.18457	0.012207	15.968	31.6273	41.003	0.065918	-0.083984	-0.10547	65.1304	324.242	817.19518	-0.82178	0.47276	-0.16133
1.89	17.8	27.401	12.5453	0.11973	0.0061523	-0.024219	-15.2026	4.7783	6.5994	0.24268	-0.17529	0.014648	-8.417	-9.503	32.071	0.063965	-0.088867	-0.11133	37.9167	313.173	767.87	-0.7417	0.43799	-0.15674
1.892	17.908	28.791	14.9528	0.12832	0.0088867	-0.024024	16.6634	3.6885	13.3318	0.23633	-0.16895	0.01709	18.778	15.3181	18.5068	0.052246	-0.092285	-0.12744	80.1605	261.1245	685.037	-0.66192	0.4001	-0.1584
1.894	-3.687	13.8934	6.9728	0.13535	0.019043	-0.024024	7.544	37.374	-1.91635	0.23486	-0.1582	0.016113	-2.501	-13.321	3.626	0.044677	-0.093506	-0.13623	70.926	221.165	639.66	-0.58184	0.3666	-0.16162
1.896	14.898	1.3166	15.5321	0.14776	0.028808	-0.02041	-0.1469	0.4102	14.5947	0.23071	-0.15137	0.018067	6.505	30.5615	32.23928	0.036621	-0.097168	-0.15039	88.387	186.856	590.059	-0.50176	0.32637	-0.16319
1.898	6.132	8.4205	7.0685	0.15381	0.039551	-0.024414	61.003	6.22552	15.4248	0.22803	-0.14258	0.016602	12.7398	2.9125	31.5616	0.024414	-0.096191	-0.15576	127.905	203.803	580.704	-0.42569	0.28838	-0.15889
1.9	9.726	28.8912	4.258	0.15928	0.047559	-0.025488	-7.2915	6.0282	-0.3497	0.2251	-0.12939	0.014648	-10.347	20.058	31.1846	0.018555	-0.098633	-0.16455	127.944	204.8	529.444	-0.3584	0.24854	-0.16602
1.902	0.391999999999999	18.7321	21.7104	0.15654	0.058301	-0.02998	15.7667	-22.4947	23.7054	0.22412	-0.12842	0.0083008	-22.656	-43.698	48.208	0.0073242	-0.10742	-0.18896	85.881	198.7679	462.632	-0.29209	0.2083	-0.1667
1.904	-20.981	11.05514	57.9096	0.15498	0.068847	-0.0292	40.376	9.7835	1.95793	0.22852	-0.11328	0.0019531	-8.131	-41.202	93.123	-0.014649	-0.11694	-0.20556	90.24	197.1179	428.848	-0.22656	0.18652	-0.18926
1.906	2.849	-6.082	104.3061	0.15117	0.082618	-0.030371	-12.5155	-8.254	1.96149	0.23316	-0.10498	-0.0014649	-3.825	-41.998	121.6192	-0.037109	-0.12256	-0.22559	112.91	207.487	370.413	-0.20039	0.17559	-0.20293
1.908	-4.003	-13.968	135.9298	0.14648	0.091309	-0.031738	44.2072	-2.0875	18.5948	0.23584	-0.096191	-0.0039063	-14.742	18.21359	202.908	-0.073242	-0.12305	-0.24561	100.975	219.395	352.093	-0.16846	0.14395	-0.18379
1.91	-29.0108	-6.799	177.0115	0.14141	0.10342	-0.035547	25.874	10.6183	-6.8003	0.23486	-0.087891	-0.013184	21.452	-0.821	205.773	-0.095703	-0.11572	-0.25488	100.372	222.466	329.103	-0.12939	0.092773	-0.16504
1.912	-75.585	-14.132	245.8329	0.13222	0.11689	-0.039454	-0.886000000000001	-3.6023	6.356	0.23559	-0.080567	-0.022461	16.616	5.81233	262.714	-0.16309	-0.10205	-0.26416	64.641	192.123	283.1267	-0.086719	0.038477	-0.14043
1.914	-72.097	-33.0466	317.39	0.12558	0.12979	-0.045313	64.214	6.8567	12.9474	0.23438	-0.07373	-0.02832	4.394	-19.0573	298.403	-0.22998	-0.083496	-0.27637	17.0055	174.063	244.8761	-0.04834	-0.0075195	-0.1247
1.916	-70.641	-44.597	337.69	0.11953	0.1416	-0.053223	1.8718	8.5418	-9.552	0.23438	-0.05957	-0.030762	-5.528	11.7843	377.012	-0.30762	-0.063965	-0.2876	27.179	177.138	221.9672	-0.020996	-0.045801	-0.11377
1.918	-91.682	-72.318	353.21867	0.11035	0.15869	-0.066406	-9.7702	-5.2382	8.2806	0.22998	-0.054688	-0.033203	9.938	37.5692	423.188	-0.43652	-0.038574	-0.28955	13.406	182.474	196.684	-0.0089845	-0.06836	-0.11631
1.92	-61.3807	-110.1417	397.411	0.099024	0.17383	-0.074902	24.8023	11.8284	-0.75738	0.2251	-0.046875	-0.040039	-7.627	75.4159	525.239	-0.50195	-0.024414	-0.28711	-3.033	203.544	160.9115	-0.0058594	-0.08252	-0.11523
1.922	-81.342	-114.7417	457.059	0.080078	0.19492	-0.097266	-23.7619	8.0347	-18.337	0.21753	-0.034424	-0.038575	0.974	73.9897	576.3202	-0.65234	0.021484	-0.26514	-7.23	195.001	151.027	-0.014942	-0.090332	-0.11416
1.924	-71.924	-74.0542	484.584	0.053906	0.21875	-0.11914	-9.87	1.93146	6.6398	0.2085	-0.026855	-0.044922	0.212	78.6195	648.428	-0.83057	0.070801	-0.21924	-44.6813	172.822	104.037	-0.027832	-0.090723	-0.11338
1.926	-32.848	-31.6631	497.8562	0.014551	0.24941	-0.14775	4.2211	18.12804	-11.631	0.1958	-0.010254	-0.044434	-19.7568	20.7692	695.533	-0.96094	0.081543	-0.1748	-70.003	128.8767	91.222	-0.053223	-0.090723	-0.10869
1.928	19.7075	-5.2213	539.535	-0.036133	0.28906	-0.18066	-34.079	-9.8165	3.3525	0.1875	-0.00097656	-0.042969	-21.5566	16.735	782.709	-1.3198	0.11377	-0.075684	-28.3108	71.668	101.9162	-0.081347	-0.084277	-0.10196
1.93	-26.619	-1.143	575.26	-0.10097	0.33106	-0.21611	-2.866	1.5960509	4.0303	0.17139	0.012695	-0.040527	0.482999999999997	-18.353	848.574	-1.6319	0.17627	-0.035889	-8.544	65.55798	108.708	-0.12109	-0.074707	-0.092773
1.932	-69.579	10.707	606.971	-0.17705	0.3791	-0.25078	-15.3894	10.1238	-17.6257	0.15429	0.024903	-0.041504	-9.466	-32.634	918.884	-1.9375	0.27637	0	-54.3666	32.619	67.269	-0.1544	-0.064941	-0.085547
1.934	4.938	12.774	671.2667	-0.26025	0.43653	-0.27422	-19.9729	-16.2081	8.63726	0.14209	0.035645	-0.036621	51.3368	-62.858	936.707	-2.3008	0.43945	0.07373	-32.0658	19.8955	48.837	-0.18936	-0.060937	-0.074023
1.936	12.215	24.5099	732.338	-0.35039	0.49815	-0.29932	3.463	11.0023	-8.3693	0.11621	0.054688	-0.03418	39.4261	-120.799	935.168	-2.4644	0.52979	0.11963	-48.4882	28.7215	54.286	-0.21513	-0.051953	-0.06543
1.938	13.065	27.01	779.858	-0.45508	0.56836	-0.31934	-21.3502	4.8336	-13.1381	0.10645	0.063477	-0.025879	52.636	-155.441	917.381	-2.7246	0.7207	0.16553	-14.8732	36.154	78.585	-0.23242	-0.043554	-0.062403
1.94	-21.657	1.165	787.874	-0.56504	0.64336	-0.33887	3.043	1.41159	6.2538	0.083496	0.083496	-0.018555	-23.2466	-169.2582	928.559	-2.8028	0.86279	0.15088	41.438	13.1586	81.732	-0.24707	-0.037598	-0.057129
1.942	1.134	-18.072	781.839	-0.68428	0.71416	-0.35967	-3.772805	29.1954	-8.5791	0.064209	0.10254	-0.01709	-20.0253	-155.6216	917.6826	-2.7651	0.98877	0.11621	18.78945	-4.833	41.5267	-0.25312	-0.029687	-0.060742
1.944	19.144	-29.766	804.409	-0.79444	0.78447	-0.37607	-21.6774	-4.3602	4.0256	0.041504	0.11768	-0.013184	-41.383	-151.94	946.065	-2.5386	1.0962	0.019531	-17.8468	-16.47	-13.2703	-0.2542	-0.014063	-0.061817
1.946	57.672	-40.419	837.533	-0.8918	0.85274	-0.39649	22.4792	12.67	12.6962	0.014648	0.14063	-0.0097656	-8.974	-158.355	986.27	-2.3965	1.1172	-0.049316	28.2503	-22.003	-18.1515	-0.2542	-0.0035156	-0.062989
1.948	60.849	-81.643	877.917	-0.98047	0.91992	-0.40869	-5.8076	27.926	-20.361	0.0053711	0.15088	-0.003418	-52.0214	-196.56	1039.51	-2.0762	1.1123	-0.19531	57.111	-1.765	-8.169	-0.25205	0.011328	-0.058008
1.95	65.6332	-119.392	912.8195	-1.0483	0.96972	-0.43096	0.743	0.37402	0.4097	-0.022461	0.17529	-0.0048828	-70.876	-189.6745	1074.729	-1.8528	1.0608	-0.28613	27.3866	-3.3735	-3.736	-0.24219	0.021484	-0.058105
1.952	63.07239	-152.465	939.461	-1.1086	1.0242	-0.44804	43.6933	25.0572	3.972	-0.041749	0.19116	6.9389e-15	-59.858	-204.8	1091.0008	-1.6738	0.97852	-0.3457	76.432	1.4704	-10.753	-0.23906	0.031348	-0.054297
1.954	38.167	-158.144	974.076	-1.1504	1.077	-0.46875	-9.1105	10.4349	-6.3612	-0.0625	0.20752	0.0039063	-65.396	-160.268	1117.157	-1.5425	0.81885	-0.37646	53.127	-6.48823	-33.862	-0.23135	0.028516	-0.041602
1.956	27.576	-163.45	1016.741	-1.1738	1.1232	-0.48516	22.67842	-8.2259	17.911	-0.086426	0.23096	-0.003418	-73.089	-186.096	1183.874	-1.5229	0.71924	-0.38623	35.9513	22.0765	-29.519	-0.22236	0.029297	-0.033789
1.958	17.078	-157.7	1055.834	-1.1914	1.1387	-0.5	48.837	11.06496	15.062	-0.095215	0.24365	0.0014648	-38.8486	-155.803	1208.3201	-1.5547	0.50586	-0.39893	65.193	60.431	0.831000000000001	-0.21524	0.030371	-0.018652
1.96	36.5986	-146.084	1077.49022	-1.2204	1.1613	-0.5167	8.0233	-32.1736	57.067	-0.11963	0.24414	-0.010742	-20.2293	-189.356	1235.42	-1.6221	0.36914	-0.38257	91.43	54.124	19.7	-0.19971	0.024414	-0.0029297
1.962	15.86851	-133.113	1092.3644	-1.2539	1.1836	-0.52344	41.7347	-42.0426	97.7211	-0.16235	0.25341	-0.034179	-7.897	-174.759	1251.1017	-1.7124	0.26025	-0.34863	54.248	49.487	-11.56	-0.18633	0.013867	0.010645
1.964	-1.9111	-129.4383	1130.0637	-1.2883	1.2039	-0.53047	3.14108	-18.665	116.591	-0.21094	0.26514	-0.059082	-28.056	-252.291	1271.0323	-1.8789	0.18311	-0.27832	31.269	-6.19831	-32.301	-0.16826	0.002832	0.026758
1.966	-2.673	-115.342	1158.1738	-1.3155	1.2134	-0.52842	-17.1864	-57.0783	198.08	-0.29736	0.29834	-0.094238	-40.0382	-243.37	1311.8003	-1.9727	0.17383	-0.24707	26.704	-16.79001	-32.52643	-0.1499	-0.0053712	0.038477
1.968	1.949	-95.654	1166.0999	-1.3359	1.2246	-0.52637	-0.0710000000000015	-50.994	292.12	-0.33887	0.31885	-0.10693	-46.627	-284.295	1351.852	-2.189	0.2085	-0.19971	-9.1136	-3.59739	12.8619	-0.12686	-0.016211	0.04873
1.97	1.525	-64.223	1169.699	-1.3425	1.2083	-0.51914	-95.9717	-92.361	365.645	-0.44678	0.36279	-0.12451	-18.843	-222.674	1389.007	-2.3504	0.27075	-0.17846	24.09177	40.54041	46.3729	-0.10156	-0.022949	0.052734
1.972	-20.471	-48.875	1173.246	-1.3448	1.1845	-0.51182	-78.007	-129.8099	490.435	-0.54468	0.3877	-0.12793	-40.3485	-275.378	1424.127	-2.4956	0.36084	-0.1626	-4.117	25.7306	34.308	-0.071387	-0.03623	0.059863
1.974	-1.436	-45.841	1199.5093	-1.3339	1.1517	-0.51651	-126.0121	-94.9748	524.006	-0.65381	0.42725	-0.12842	-52.1972	-202.513	1417.275	-2.6421	0.50049	-0.16406	-61.385	-1.278	-9.1804	-0.036817	-0.049414	0.061816
1.976	6.446	-55.685	1228.56392	-1.312	1.113	-0.52314	-163.0386	-100.1926	565.63359	-0.81201	0.4751	-0.11182	-19.8315	-249.171	1417.543	-2.6968	0.57275	-0.16016	-51.189	-12.0407	-5.596	0.0010735	-0.065039	0.0583
1.978	-34.192	-75.532	1250.752	-1.2788	1.0786	-0.53369	-112.4165	-66.501	612.859	-0.90381	0.49951	-0.10352	9.77	-130.572	1433.407	-2.7749	0.71729	-0.17432	-51.8683	-16.0141	21.8472	0.037988	-0.081249	0.055566
1.98	-39.102	-100.63448	1274.893	-1.2417	1.0493	-0.54912	-110.774	-63.716	629.84	-1.1289	0.55859	-0.080078	26.119	-134.9921	1466.978	-2.8267	0.81983	-0.20093	-40.359	15.4834	40.514	0.076172	-0.09668	0.054199
1.982	-43.769	-96.643	1300.016	-1.2104	1.0352	-0.56592	-41.2764	-103.0641	704.086	-1.3025	0.62427	-0.043945	69.1387	-41.198	1497.2435	-2.8652	0.91406	-0.23584	-41.61	6.8031	56.439	0.11543	-0.11806	0.046679
1.984	-24.8183	-86.113	1315.726	-1.1968	1.0349	-0.59209	17.156	-58.3776	734.24	-1.4941	0.66016	-0.029785	97.036	-87.194	1520.102	-2.8945	1.0254	-0.2915	-33.4134	13.5537	12.2438	0.15381	-0.1378	0.04795
1.986	-32.7218	-91.4443	1332.976	-1.2021	1.0555	-0.61797	-46.187	-42.539	746.7394	-1.7886	0.72559	-0.0039063	90.656	-30.627	1500.429	-2.9004	1.0781	-0.31836	-66.182	-10.139	-9.747	0.19366	-0.16397	0.0542
1.988	5.656	-99.44667	1350.533	-1.2295	1.0898	-0.64063	-23.152	-25.189	827.865	-1.9565	0.77588	-0.0043945	91.421	-65.902	1483.108	-2.8691	1.1348	-0.37744	-40.9456	2.68459	-6.694	0.2294	-0.19024	0.054981
1.99	26.5921	-102.9573	1363.1427	-1.2688	1.1371	-0.66308	-37.5227	-0.886700000000001	775.4593	-2.2578	0.9082	-0.023438	74.7057	-32.385	1470.219	-2.8223	1.1426	-0.42139	-23.758	38.712	27.1894	0.24707	-0.21094	0.054199
1.992	-10.79469	-87.4289	1367.0515	-1.3105	1.186	-0.67822	-51.4018	-63.6386	779.698	-2.4135	1.0034	-0.012207	75.6534	-81.689	1487.901	-2.771	1.1274	-0.4624	-12.782	20.931	33.278	0.24815	-0.22168	0.047267
1.994	-11.565	-84.7841	1375.2145	-1.3542	1.2329	-0.69658	11.5745	-103.0573	830.3862	-2.4839	1.0708	0.019531	34.742	-40.817	1497.811	-2.6909	1.0786	-0.48877	-0.004	12.4115	29.624	0.24336	-0.22461	0.048341
1.996	-5.83	-68.733	1373.54	-1.4026	1.267	-0.71778	-18.0111	-113.932	872.871	-2.4688	1.1143	0.059082	50.4855	-103.719	1500.458	-2.6519	1.0415	-0.48779	-26.2312	-23.25614	-16.1419	0.23985	-0.21993	0.039749
1.998	1.691	-46.392	1382.458	-1.4702	1.311	-0.7417	-26.0226	-122.81	947.043	-2.4121	1.1191	0.065918	26.181	-88.129	1517.749	-2.5972	0.96924	-0.48975	9.6643	-25.1616	-10.6257	0.23887	-0.21416	0.033203
2	-8.3626	-27.02	1363.4122	-1.5408	1.3561	-0.76485	33.6278	-108.469	939.671	-2.271	1.106	0.030762	45.666	-122.316	1542.566	-2.5698	0.90772	-0.48681	35.5827	-22.897	20.1311	0.24512	-0.21143	0.02832
2.002	-0.1899	-30.2508	1351.5224	-1.6187	1.4142	-0.78642	34.67621	-128.733	931.946	-2.1376	1.0762	-0.0039063	20.784	-67.9885	1547.232	-2.5586	0.84473	-0.48096	57.6168	5.1768	22.102	0.2545	-0.20058	0.031833
2.004	-15.3116	-16.1195	1349.25678	-1.6917	1.4802	-0.80596	64.678	-202.2645	960.081	-1.9819	1.0298	-0.033691	45.7499	-57.8588	1527.972	-2.5405	0.76904	-0.46582	48.836	14.41	-4.499	0.26827	-0.18876	0.028117
2.006	-22.357	0.735000000000001	1362.413	-1.763	1.5425	-0.82197	83.734	-226.39	1000.923	-1.7847	0.93994	-0.054199	56.414	-4.819	1533.559	-2.5347	0.74658	-0.45898	51.411	-3.0638	-32.254	0.27921	-0.17665	0.017957
2.008	-20.6246	5.841	1364.553	-1.8257	1.605	-0.8374	52.909	-241.954	1043.643	-1.7085	0.88428	-0.063965	53.096	-6.813	1544.347	-2.5132	0.70166	-0.44775	74.897	-12.4221	-25.0828	0.2835	-0.15926	0.0074104
2.01	-5.1146	-9.436	1351.41	-1.8823	1.6634	-0.85088	100.454	-257.771	1117.65	-1.603	0.77881	-0.07666	1.93	6.593	1553.278	-2.5044	0.68701	-0.4458	46.8792	-10.18136	-2.953	0.28809	-0.1377	-0.0068359
2.012	-1.404	-36.9352	1366.7986	-1.9285	1.7218	-0.86728	58.512	-241.607	1134.006	-1.5727	0.7063	-0.081055	8.218	-3.038	1501.9605	-2.4897	0.67822	-0.43848	91.504	27.321	17.387	0.29053	-0.11967	-0.028676
2.014	-6.189	-44.73	1371.258	-1.9738	1.775	-0.88525	29.084	-278.276	1180.258	-1.5781	0.64648	-0.083984	-41.5409	21.2074	1515.369	-2.46	0.67773	-0.43164	58.7096	20.944	-9.8616	0.28743	-0.099386	-0.054301
2.016	-18.5742	-49.5504	1379.614	-1.9986	1.8163	-0.89658	51.601	-269.282	1242.006	-1.626	0.58496	-0.077637	-21.702	33.283	1493.888	-2.4395	0.67773	-0.43164	39.582	39.6198	-30.953	0.27612	-0.077143	-0.080084
2.018	-20.5386	-34.6	1365.8941	-2.0132	1.8481	-0.90381	-2.6319	-227.692	1257.233	-1.6636	0.56543	-0.071777	-48.182	64.468	1490.655	-2.394	0.67822	-0.43018	10.0695	21.6918	-18.453	0.26499	-0.059645	-0.10597
2.02	-28.1535	-20.245	1374.088	-2.0178	1.8733	-0.9127	9.0996	-221.061	1306.763	-1.7695	0.54346	-0.062988	10.411	67.267	1415.6591	-2.3542	0.67993	-0.42383	28.7519	24.302	1.8179	0.24707	-0.03418	-0.12939
2.022	-37.909	-21.0926	1362.601	-2.0116	1.8915	-0.91279	-33.4389	-152.781	1312.951	-1.8725	0.54883	-0.058838	-38.988	61.312	1424.888	-2.3125	0.67285	-0.42188	31.2924	39.12	36.8042	0.21816	-0.0079816	-0.14276
2.024	-55.148	-35.602	1343.66	-1.9972	1.8935	-0.90928	-57.4166	-108.814	1299.462	-1.9844	0.57422	-0.059082	-11.794	59.794	1385.3438	-2.2534	0.6626	-0.40869	1.317	14.1539	30.344	0.18836	0.022612	-0.1468
2.026	-53.107	-44.372	1337.155	-1.9783	1.8877	-0.90234	7.72854	-112.183	1330.911	-2.1519	0.62939	-0.060547	-22.06	42.145	1419.264	-2.2246	0.65527	-0.40625	-9.0401	23.047	-18.5649	0.16129	0.050589	-0.14312
2.028	-47.685	-33.913	1341.952	-1.959	1.873	-0.89453	-28.7685	-71.889	1330.012	-2.2383	0.66309	-0.068359	39.9421	68.923	1357.272	-2.1699	0.62695	-0.39404	-49.1217	-2.9952	-30.0575	0.10741	0.079958	-0.14314
2.03	-55.468	-8.982	1325.5929	-1.9383	1.859	-0.88594	-51.8	-101.144	1356.597	-2.3999	0.74463	-0.085449	30.53	58.1567	1393.226	-2.1421	0.60644	-0.38916	-40.0805	16.467	1.9372	0.041016	0.11963	-0.14014
2.032	-77.563	-2.913	1317.1266	-1.9163	1.8329	-0.86944	-31.1383	-101.913	1401.5552	-2.5056	0.80933	-0.090332	66.2509	88.384	1350.293	-2.1108	0.58643	-0.37451	-31.5436	7.758	28.676	-0.027951	0.15329	-0.13888
2.034	-63.339	16.2457	1294.2966	-1.8901	1.8059	-0.85733	-92.519	-65.952	1402.5943	-2.5938	0.88281	-0.088867	34.612	66.1783	1345.2423	-2.0645	0.56934	-0.35156	-22.23713	0.162000000000003	53.626	-0.094423	0.1904	-0.13908
2.036	-40.299	49.407	1274.7122	-1.8685	1.7721	-0.8415	-89.23	-110.212	1445.449	-2.6895	0.97852	-0.085449	43.944	99.175	1263.607	-2.0444	0.56299	-0.33936	-48.201	-0.1808	42.3104	-0.15437	0.22834	-0.13352
2.038	-50.569	79.29	1276.726	-1.8418	1.7363	-0.82422	-82.093	-102.0888	1477.7539	-2.7456	1.0317	-0.10498	32.501	72.515	1275.226	-1.9839	0.55127	-0.31348	-66.615	-10.3344	10.676	-0.20509	0.26371	-0.13493
2.04	-50.492	70.768	1272.45999	-1.8187	1.6985	-0.80889	-114.984	-119.279	1473.189	-2.8374	1.145	-0.14941	46.44058	106.4347	1231.7227	-1.9389	0.54443	-0.302	-32.9766	10.038	35.47	-0.24316	0.29248	-0.13574
2.042	-52.716	55.076	1262.3667	-1.7933	1.6651	-0.79092	-73.72	-160.378	1498.9975	-2.8738	1.2239	-0.18335	48.7876	71.747	1225.653	-1.8887	0.54102	-0.28906	-44.7646	-3.9669	38.173	-0.26746	0.3114	-0.15209
2.044	-43.402	28.88796	1252.658	-1.7698	1.6292	-0.77373	-79.976	-108.033	1492.48	-2.8765	1.2876	-0.19971	66.511	108.796	1137.184	-1.812	0.54541	-0.26123	-10.544	2.05674	20.5176	-0.27771	0.32147	-0.16661
2.046	-61.407	27.95166	1233.871	-1.7399	1.5883	-0.75723	-76.6468	-135.80033	1498.085	-2.8418	1.3311	-0.20898	36.2504	97.399	1116.954	-1.7729	0.54932	-0.25537	-32.1868	-33.5427	-6.9303	-0.2747	0.31376	-0.19955
2.048	-22.1937	17.1692	1229.9	-1.7085	1.5571	-0.74756	-43.295	-143.509	1561.503	-2.8159	1.3442	-0.2085	36.324	166.213	1058.532	-1.687	0.55029	-0.22998	-21.1948	-21.1161	-18.0461	-0.25011	0.29175	-0.23988
2.05	-21.5433	24.9894	1199.7586	-1.6865	1.5271	-0.7291	-54.55491	-106.7952	1556.351	-2.7793	1.3516	-0.21045	30.275	157.489	1039.48	-1.615	0.54712	-0.21631	-7.804	-1.4633	-15.8644	-0.19873	0.26953	-0.27588
2.052	-32.758	26.505	1158.261	-1.6617	1.5016	-0.71328	-32.1024	-149.452	1552.576	-2.7598	1.3506	-0.20508	35.8543	224.044	988.635	-1.5464	0.54346	-0.20752	21.1667	21.0822	15.5299	-0.14036	0.23978	-0.30937
2.054	-21.963	33.086	1157.686	-1.6441	1.4785	-0.70039	-2.2787	-93.794	1523.7571	-2.7559	1.3516	-0.20508	47.452	198.119	991.63484	-1.4453	0.52881	-0.19238	36.3709	45.607	18.83	-0.069656	0.2026	-0.33111
2.056	-9.7507	24.849	1157.1669	-1.6251	1.4562	-0.6915	-37.0764	-19.529	1468.847	-2.7383	1.3496	-0.19727	21.8457	246.478	969.2028	-1.3984	0.52148	-0.17822	49.8766	-0.606999999999999	-13.51954	-0.0031145	0.16587	-0.35188
2.058	-13.1977	34.0991	1160.908	-1.5991	1.4341	-0.68213	8.257	-26.212	1476.442	-2.7338	1.3501	-0.17993	3.271	204.725	952.227	-1.3003	0.5083	-0.16553	59.629	18.958933	-3.44	0.057858	0.12602	-0.37003
2.06	-11.914	48.17	1124.312	-1.575	1.4062	-0.66836	-4.04	26.177	1480.4669	-2.7222	1.3472	-0.17236	-35.7511	250.229	887.238	-1.2331	0.5017	-0.15039	21.0368	-25.8835	25.833	0.11377	0.077148	-0.38965
2.062	7.6348	51.3347	1107.761	-1.5569	1.3798	-0.65928	-24.4493	-7.562	1495.646	-2.7031	1.332	-0.15332	-30.295	211.166	865.59	-1.168	0.49023	-0.13525	76.042	-39.1408	72.048	0.14263	0.021245	-0.41934
2.064	-0.992000000000001	63.137	1079.034	-1.5366	1.3579	-0.64599	34.19438	-51.536	1512.034	-2.6909	1.3247	-0.146	-50.94637	244.61	837.5789	-1.082	0.47559	-0.11719	54.69	-48.389	101.994	0.15811	-0.041506	-0.45196
2.066	-26.2618	80.819	1048.893	-1.5067	1.3432	-0.62861	0.780999999999999	-9.92987	1490.388	-2.6597	1.3013	-0.14014	-59.163	186.2431	783.721	-1.0381	0.46875	-0.10352	26.636	-42.484	117.435	0.15467	-0.093397	-0.48006
2.068	-17.36112	90.802	1020.28	-1.4707	1.332	-0.6123	-25.8594	-33.533	1465.215	-2.6406	1.2788	-0.12939	-64.735	219.329	740.179	-0.96484	0.45557	-0.083984	46.596	-12.038	141.667	0.13053	-0.12898	-0.50927
2.07	-9.81278	95.2525	999.699	-1.4267	1.3015	-0.59561	17.9125	8.0326	1458.567	-2.6113	1.252	-0.12793	-64.905	186.0337	716.145	-0.89453	0.43359	-0.061523	67.5651	-7.4849	209.436	0.071777	-0.14307	-0.53174
2.072	-24.7095	88.69552	980.415	-1.3863	1.2672	-0.58242	-21.62952	33.2531	1429.1812	-2.5698	1.2095	-0.12598	-66.079	227.985	673.9605	-0.85889	0.42725	-0.058105	68.5881	24.8342	277.3	-0.030056	-0.12588	-0.53995
2.074	-34.885	100.454	960.83	-1.3504	1.2375	-0.56797	-23.4055	-52.885	1468.0691	-2.5527	1.1875	-0.12207	-70.558	184.5053	646.0138	-0.79102	0.41016	-0.038574	40.303	19.9651	371.091	-0.16675	-0.073228	-0.53429
2.076	-35.68061	100.823	938.48075	-1.3124	1.2064	-0.55655	-28.3308	-26.9163	1463.166	-2.5137	1.1494	-0.11523	-76.539	232.257	600.532	-0.7483	0.39819	-0.029541	48.9477	59.225	469.8011	-0.32561	0.010353	-0.51479
2.078	-36.4972	96.499	931.155	-1.271	1.1743	-0.53857	-58.4666	-57.903	1465.044	-2.4793	1.1189	-0.11255	-48.412	203.7598	560.449	-0.70654	0.3833	-0.023438	-24.5904	46.4824	577.5703	-0.4906	0.10535	-0.48265
2.08	-21.975	81.288	919.0355	-1.2335	1.1375	-0.52021	-22.0369	-45.7	1497.977	-2.4443	1.0908	-0.10498	-33.633	233.955	564.716	-0.65137	0.3584	-0.015625	-30.355	93.409	701.95289	-0.66016	0.21289	-0.44092
2.082	-38.574	82.456	880.208	-1.1879	1.0902	-0.4994	-88.349	40.257	1443.136	-2.3862	1.0552	-0.10498	-33.4262	190.5275	521.086	-0.62891	0.35645	-0.017578	-29.823	106.22	842.6112	-0.83217	0.31681	-0.39428
2.084	-19.2593	88.6332	852.1489	-1.1476	1.0429	-0.4826	-91.258	-0.914999999999999	1397.955537	-2.3516	1.0321	-0.10407	-66.95	215.211	486.133	-0.57422	0.33008	-0.012207	-45.381	82.015	946.8358	-1.0655	0.38999	-0.31605
2.086	-11.794	100.4145	843.2421	-1.0984	0.99155	-0.46874	-51.5017	22.835	1365.4274	-2.3303	1.02	-0.10483	-25.584	175.741	437.137	-0.53369	0.31617	-0.014649	-65.745	42.531	1015.657	-1.4734	0.44662	-0.21287
2.088	-14.097	103.085	828.0568	-1.0557	0.94141	-0.4502	-108.11	43.722	1325.2305	-2.3075	1.0055	-0.10416	-38.8191	187.158	390.0165	-0.49902	0.30078	-0.01709	-62.732	-67.687	1113.444	-2.0074	0.55091	-0.16582
2.09	-33.611	106.923	803.023	-1.0091	0.89793	-0.44299	-84.657	12.0133	1344.294	-2.2845	0.98921	-0.10325	-30.82625	151.116	350.0684	-0.45361	0.27832	-0.01709	-57.4136	-109.873	1180.202	-2.5977	0.74902	-0.18066
2.092	-45.26743	115.775	773.548	-0.96879	0.85039	-0.43568	-64.605	95.465	1318.256	-2.2617	0.9707	-0.10254	-12.05	165.992	346.197	-0.43311	0.27246	-0.019531	-40.488	-175.78	1195.031	-3.1493	1.0446	-0.17177
2.094	1.087	95.8956	768.6442	-0.93012	0.82189	-0.42824	-96.361	87.166	1293.47788	-2.2286	0.95739	-0.10382	14.9074	128.998	295.54	-0.39453	0.25293	-0.0097656	11.69265	-227.866	1165.565	-3.5634	1.3825	-0.1367
2.096	1.219	87.2088	766.334	-0.89515	0.79705	-0.41635	-68.583	75.2418	1272.1667	-2.1891	0.93827	-0.10119	15.6279	123.975	291.6354	-0.37231	0.24194	-0.010986	-59.4579	-308.786	1105.975	-3.7356	1.7079	-0.087492
2.098	-20.05393	100.7563	730.84	-0.86279	0.77002	-0.40137	-56.963	119.828	1224.722	-2.1357	0.91242	-0.096634	-0.032	92.701	245.98	-0.3501	0.22852	-0.0087891	-122.257934	-364.943	1106.155	-3.6354	1.9439	-0.13273
2.1	-8.097	105.2697	683.5864	-0.83254	0.74802	-0.39194	-36.1178	61.069	1208.253	-2.0549	0.87538	-0.091754	-22.1056	110.711	231.428	-0.3291	0.20557	0.003418	-108.146	-332.574	1123.944	-3.3159	2.0435	-0.26074
2.102	35.8644	108.642	648.76943	-0.80708	0.72698	-0.37773	-29.9162	101.3925	1216.2662	-1.9585	0.83057	-0.088379	23.665507	126.321	190.58	-0.31201	0.19531	0.00048828	-76.467	-277.706	1185.135	-2.8396	1.9905	-0.44188
2.104	20.698	107.3703	620.6839	-0.77627	0.70545	-0.36831	-55.928	124.655	1184.9342	-1.8855	0.79892	-0.087574	23.6546	136.2056	178.4258	-0.2915	0.17383	0.015137	-61.382	-231.675	1226.663	-2.3452	1.8778	-0.612
2.106	-7.597	119.735	591.961	-0.75415	0.68727	-0.35785	-24.8885	68.653	1170.0754	-1.8149	0.76249	-0.087033	21.4871	130.894	148.121	-0.27027	0.15845	0.02539	-93.833	-269.501	1253.576	-1.9093	1.7309	-0.72685
2.108	23.981	122.896	582.2024	-0.72607	0.66455	-0.34229	-9.0069	124.267	1144.6907	-1.7526	0.73475	-0.084559	-23.15523	98.4799	140.3736	-0.24951	0.14209	0.03125	-124.843	-272.756	1231.5829	-1.5823	1.5419	-0.79482
2.11	53.4601	124.127	572.6441	-0.70094	0.64511	-0.33037	0.2673	91.2827	1095.144	-1.688	0.70495	-0.092318	0.473300000000001	95.252	114.815	-0.22412	0.11865	0.040527	-124.472	-267.4721	1245.132	-1.355	1.313	-0.84326
2.112	47.152	120.199	568.1538	-0.6759	0.6295	-0.31902	40.425	69.144	1102.4383	-1.6245	0.67334	-0.084961	-24.0349	86.1445	97.6504	-0.21387	0.10938	0.043945	-33.1235	-172.352	1297.838	-1.2099	1.071	-0.85361
2.114	12.381	106.2296	538.0689	-0.65248	0.60614	-0.30996	-0.4026	134.4591	1086.8847	-1.5604	0.64922	-0.088963	-14.9826	97.901	57.4	-0.18311	0.094238	0.049316	-21.6288	-126.08	1341.196	-1.1226	0.84482	-0.84306
2.116	8.208	103.0199	505.5456	-0.63094	0.58931	-0.29836	32.6901	90.091	1049.1859	-1.5002	0.62006	-0.08789	-41.0325	86.9858	38.9426	-0.16431	0.082032	0.052247	-30.3288	-137.893	1349.336	-1.0898	0.65811	-0.82393
2.118	11.567	114.111	486.326	-0.60889	0.55518	-0.29541	49.539	130.276	1036.48325	-1.4413	0.5894	-0.088767	-6.568	93.463	7.463	-0.13818	0.070801	0.055176	-6.872	-179.59	1333.495	-1.1029	0.52265	-0.78653
2.12	21.4	126.466	450.7763	-0.57511	0.51963	-0.28038	38.172	142.9553	978.981	-1.383	0.56346	-0.08924	-30.5461	51.716	-3.4755	-0.10791	0.05957	0.055176	-21.3381	-234.3658	1366.729	-1.1694	0.45361	-0.73975
2.122	8.28	107.4646	427.56764	-0.5442	0.489	-0.26439	56.723	114.4699	942.17	-1.3281	0.53516	-0.088379	-32.9381	51.3861	-7.003	-0.10156	0.061035	0.055664	-13.6042	-225.221	1428.205	-1.31	0.46963	-0.69893
2.124	9.561	95.582	420.243	-0.51686	0.45621	-0.25491	41.7869	175.991	915.7582	-1.2732	0.51043	-0.087654	-49.2227	8.1196	15.4599	-0.077637	0.048828	0.048828	-24.5543	-244.46394	1510.8601	-1.5133	0.5418	-0.66426
2.126	28.132	86.8402	410.035	-0.49132	0.42523	-0.23835	16.0319	163.25	876.3519	-1.2223	0.49275	-0.088646	-20.808	31.23	14.2176	-0.04956	0.039062	0.0542	-78.031	-240.063	1511.604	-1.7586	0.66211	-0.658
2.128	6.75	97.582	386.7417	-0.46875	0.39307	-0.23145	33.926	146.9683	868.7308	-1.1719	0.4707	-0.082679	-41.8725	22.68057	32.8554	-0.013184	0.018555	0.05957	-102.671	-300.416	1487.913	-2.0223	0.80703	-0.66992
2.13	1.18	93.957	365.3066	-0.44361	0.37197	-0.21743	-2.257	186.717	836.2102	-1.1168	0.45191	-0.076059	-27.4752	67.769	15.36593	0.029297	-0.011719	0.071777	-71.907	-292.698	1492.4804	-2.2715	0.96289	-0.69238
2.132	-12.468	92.618	348.3399	-0.42075	0.35284	-0.20285	1.6038	138.6728	796.288	-1.0679	0.43018	-0.077148	-35.3458	29.348	7.122	0.049316	-0.024414	0.070801	-32.8082	-262.353	1540.018	-2.4628	1.1294	-0.72256
2.134	7.991	90.0424	339.1743	-0.39107	0.32779	-0.19832	25.3323	160.3207	773.7613	-1.0151	0.40507	-0.070142	-6.068	44.59	36.563	0.073242	-0.053711	0.067383	-31.3203	-177.6586	1591.421	-2.5703	1.2851	-0.75313
2.136	-6.368	90.413	309.486	-0.35958	0.30137	-0.19536	-35.0995	187.515	704.2233	-0.96049	0.38336	-0.064865	-26.583	-7.38265	24.582	0.091064	-0.067871	0.072266	-21.8654	-108.157	1598.674	-2.5707	1.4285	-0.78867
2.138	-16.2454	103.518	282.2044	-0.32471	0.27686	-0.18799	-10.574	157.0847	694.3347	-0.90538	0.36348	-0.062112	-30.7103	30.2576	26.1382	0.10889	-0.07959	0.071777	-17.4235	-97.826	1584.347	-2.4828	1.5336	-0.83516
2.14	-11.508	99.465	284.298	-0.29488	0.25059	-0.18213	-9.3035	205.67	659.7699	-0.85507	0.33755	-0.062012	1.7237	-13.1137	22.793	0.12598	-0.10107	0.07959	9.918	-63.509	1551.62	-2.3438	1.5996	-0.88281
2.142	-0.265000000000001	93.253	267.9193	-0.26899	0.2262	-0.17955	-45.335	159.673	645.835	-0.80566	0.32031	-0.056641	32.7981	18.0634	22.8469	0.13184	-0.11084	0.081543	71.913	-97.664	1586.43	-2.1909	1.6274	-0.93271
2.144	-7.916	93.267	246.8902	-0.24551	0.20771	-0.17165	-9.9268	120.5747	633.474	-0.75142	0.30163	-0.059659	14.454	-21.0601	27.8256	0.14307	-0.12451	0.090332	73	-62.006	1546.8444	-2.0542	1.6244	-0.9667
2.146	-15.37	85.038	222.263	-0.22396	0.18908	-0.16642	-39.138	149.976	597.115	-0.70013	0.28063	-0.052833	29.976	22.8679	7.4548	0.15064	-0.13257	0.09375	32.1047	-70.22	1521.901	-1.9558	1.5946	-0.98623
2.148	18.591	79.927	242.538	-0.20264	0.16992	-0.15674	-31.8732	106.8963	557.32852	-0.64859	0.25916	-0.053223	22.6468	-13.4728	0.1945	0.1626	-0.14893	0.093262	-43.21	-78.075	1493.0217	-1.9024	1.5569	-0.9794
2.15	18.154	63.7709	232.432	-0.19058	0.15876	-0.14742	-12.435	146.6914	517.7139	-0.59734	0.23856	-0.048629	46.425	42.509	13.1793	0.16553	-0.16211	0.091309	-72.485	-56.359	1466.5687	-1.896	1.5142	-0.95068
2.152	1.745	62.7579	207.5891	-0.17574	0.14997	-0.1394	-32.9152	158.407	481.2163	-0.55078	0.21924	-0.050293	29.2658	-16.126	29.4518	0.16846	-0.17041	0.098145	-34.595	-73.323	1508.6212	-1.9312	1.4633	-0.91816
2.154	14.736	63.1239	185.9687	-0.16756	0.1398	-0.13203	-0.695	103.4073	460.4572	-0.51476	0.19971	-0.046972	32.9369	34.09189	33.88	0.19971	-0.18555	0.093262	32.4752	-68.147	1538.4343	-1.9781	1.413	-0.88252
2.156	23.872	66.5588	176.7729	-0.15585	0.12937	-0.12636	-7.678	142.6601	425.635	-0.47355	0.18341	-0.045701	28.708	-5.897	16.1611	0.22559	-0.19678	0.083984	14.9149	-84.84	1531.426	-2.0186	1.3606	-0.84189
2.158	23.534	60.8971	172.0766	-0.14453	0.1167	-0.12256	3.6501	100.7887	408.219	-0.42745	0.16231	-0.052342	38.6582	27.3476	-2.1704	0.25049	-0.21045	0.078125	-30.8191	-81.34	1516.693	-2.0399	1.3073	-0.80791
2.16	-5.8	66.7783	151.45933	-0.13058	0.10851	-0.11475	39.6887	105.967	382.022	-0.37442	0.13946	-0.050488	29.021	-22.784	-4.140482	0.29688	-0.22119	0.069824	-34.467	-84.582	1489.51	-2.0366	1.2603	-0.7749
2.162	25.281	49.154	145.9351	-0.10821	0.088009	-0.11104	23.3567	155.591	341.0636	-0.33008	0.11035	-0.045898	3.81	7.52876	-14.03565	0.31982	-0.23047	0.065918	17.2758	-44.46819	1471.1601	-2.0086	1.2266	-0.74844
2.164	34.2764	50.6728	162.827	-0.085964	0.068864	-0.10284	34.2657	120.8337	310.031	-0.28808	0.083592	-0.047852	0.994	-20.7315	-8.7959	0.35303	-0.24463	0.048828	73.89	-25.254	1447.861	-1.9578	1.199	-0.72881
2.166	29.0691	56.8182	166.02	-0.065731	0.048838	-0.098438	48.4913	144.20354	281.542	-0.25244	0.062009	-0.049122	35.723	20.1315	-0.9033	0.35889	-0.24805	0.033203	59.712	-14.266	1434.076	-1.9003	1.1766	-0.71435
2.168	4.596	58.8519	140.1112	-0.039551	0.024414	-0.10059	29.0396	125.475	267.3684	-0.22197	0.039355	-0.053028	15.421	-21.8352	5.676	0.36182	-0.24463	0.02002	16.2767	0.6389	1384.249	-1.8332	1.1549	-0.69688
2.17	16.287	53.5099	107.45135	-0.014935	0.0074169	-0.1	80.537	83.712	260.675	-0.18418	0.015331	-0.048242	-23.777	0.7462	12.408	0.35791	-0.23535	-0.0029297	-31.1584	21.006	1366.58992	-1.7651	1.1235	-0.6792
2.172	32.778	55.192	97.2748	0.0062566	-0.0086956	-0.098535	53.225	129.765	247.0107	-0.14941	-0.010254	-0.052734	-31.11	-18.39164	-16.369	0.35791	-0.22559	-0.0078125	-33.4673	111.741	1334.243	-1.701	1.0989	-0.65146
2.174	7.684	65.837	87.6911	0.028521	-0.022757	-0.10205	54.965	102.389	218.5786	-0.11963	-0.028808	-0.052637	-15.315	27.0463	-42.9794	0.35645	-0.2207	-0.012207	-18.6427	131.949	1330.563	-1.6434	1.066	-0.62598
2.176	4.233	64.307	73.6409	0.04717	-0.034669	-0.098047	58.293	90.922	198.9695	-0.097758	-0.05166	-0.056836	-33.4491	17.972	-25.085	0.36231	-0.20923	-0.015137	-12.632	148.778	1292.626	-1.589	1.0367	-0.60293
2.178	3.525	49.5376	67.9456	0.061035	-0.041504	-0.099121	37.2192	112.95	170.326	-0.068067	-0.068457	-0.050195	-15.429	37.2484	-7.007	0.36523	-0.2002	-0.013672	-42.1888	104.079	1196.531	-1.54	1.0076	-0.57939
2.18	15.769	41.3605	65.6698	0.072753	-0.051367	-0.097755	43.29889	60.323	155.628	-0.045899	-0.087598	-0.047559	-39.2606	12.086	2.8029	0.36279	-0.18701	-0.012695	-58.107	63.505	1171.013	-1.4897	0.97998	-0.56104
2.182	-7.977	37.9429	70.3238	0.079979	-0.057324	-0.095703	43.45224	81.363	141.192	-0.036621	-0.10449	-0.046875	-46.6899	33.2897	17.9998	0.3584	-0.18506	-0.010742	-58.147	112.1658	1150.692	-1.4447	0.95371	-0.53662
2.184	-11.985	35.5422	72.4603	0.089355	-0.062402	-0.091406	14.4874	85.227	151.2234	-0.021582	-0.11152	-0.037598	-42.1634	41.4849	-14.629	0.34912	-0.16846	-0.0039063	-8.21127	140.724	1182.024	-1.3948	0.92979	-0.51826
2.186	-5.76	41.552	77.3666	0.095312	-0.070605	-0.083398	12.1501	43.003	150.3723	-0.016504	-0.11865	-0.041992	-20.123	56.496	-1.2011	0.33789	-0.15673	-0.005127	12.1018	196.684	1182.978	-1.3444	0.90908	-0.49599
2.188	4.835	50.573	68.7768	0.10254	-0.072754	-0.083496	5.7365	79.4533	132.136	-0.018066	-0.12139	-0.041601	-15.988	51.064	18.2495	0.32227	-0.14355	-0.003418	-21.7334	180.283	1132.16266	-1.2959	0.88926	-0.47139
2.19	-5.945	37.2865	57.3962	0.11015	-0.08252	-0.076562	-8.9613	58.52	109.88433	-0.018848	-0.12041	-0.04414	-21.972	37.854	0.5117	0.30078	-0.12012	-0.0014648	-33.7538	183.024	1100.652	-1.2456	0.87158	-0.44482
2.192	-35.1832	28.576	34.68	0.11524	-0.085157	-0.072266	-4.686	55.0893	72.668	-0.012207	-0.12109	-0.038574	9.114	24.24702	10.9086	0.28955	-0.11182	-0.0039063	-39.343	173.479	1080.013	-1.1952	0.85596	-0.41201
2.194	5.722	23.139	48.7621	0.12461	-0.085157	-0.070313	-27.0164	87.104	66.5973	-0.0068359	-0.12314	-0.035742	0.611999999999998	13.3516	29.184	0.26318	-0.088379	-0.00048828	-16.1141	200.57	1085.884	-1.1421	0.83779	-0.39248
2.196	6.977	27.2837	32.8638	0.13057	-0.088867	-0.070117	-6.1931	42.497	60.367	0.0024414	-0.12207	-0.029785	2.499	10.73	12.6055	0.24732	-0.073731	0	14.59966	180.7504	1074.265	-1.0885	0.81709	-0.36943
2.198	-15.004	27.6254	30.9811	0.13623	-0.09082	-0.066895	-31.7791	61.5745	55.8511	0.017676	-0.12481	-0.02666	5.903	3.6422	35.82	0.22852	-0.055664	0.0039063	-40.6545	134.26	1010.104	-1.036	0.7957	-0.35195
2.2	-23.334	22.1041	29.5091	0.14033	-0.093262	-0.064844	-58.574	63.157	42.5421	0.030273	-0.1252	-0.025879	24.034	25.145	-7.8146	0.20605	-0.030273	0.0083008	-74.422	101.312	915.49	-0.97949	0.77051	-0.33252
2.202	-0.305	23.456	50.3106	0.14844	-0.099511	-0.062012	2.28	17.3794	53.5264	0.045898	-0.12549	-0.022949	27.5037	21.1231	21.8227	0.19287	-0.023926	0.0063477	-68.398	96.481	880.491	-0.91768	0.75439	-0.31465
2.204	8.983	27.054	50.7937	0.15391	-0.10341	-0.061621	-38.1529	65.376	31.1558	0.047168	-0.12461	-0.022168	57.061	34.24	36.565	0.17188	-0.0043945	0.018066	-16.9622	192.9155	840.2068	-0.85283	0.73701	-0.29639
2.206	-15.999	21.7708	31.195	0.15752	-0.10693	-0.059863	-34.426	40.852	24.8113	0.048633	-0.11757	-0.024903	34.7107	-7.3	54.276	0.15503	0.01123	0.026368	-6.1894	220.859	825.136	-0.78994	0.72334	-0.27803
2.208	14.408	26.0735	27.7921	0.16016	-0.10693	-0.059082	-4.23	32.51869	22.4751	0.056055	-0.11836	-0.020996	30.636	20.3022	25.7769	0.14453	0.025391	0.029297	-12.638	245.754	769.2764	-0.72861	0.7044	-0.25732
2.21	1.004	32.0338	18.995	0.15957	-0.1082	-0.062109	-38.491	57.66	3.2166	0.067187	-0.11983	-0.014453	9.3	-15.5586	31.532	0.12158	0.042969	0.035156	-64.7783	209.2632	698.823	-0.66943	0.69092	-0.23926
2.212	10.259	47.188	4.808	0.15342	-0.10166	-0.064453	7.9782	9.7974	28.9713	0.07959	-0.12744	-0.0087891	32.1209	24.0678	-0.678900000000001	0.10303	0.055664	0.044678	-39.3474	194.342	660.911	-0.61328	0.67315	-0.21963
2.214	15.104	36.297	11.21216	0.14326	-0.091504	-0.065235	17.8191	13.8157	23.1497	0.078809	-0.12607	-0.006836	25.234	-14.315	27.612	0.081055	0.071289	0.044922	4.515	239.387	637.0061	-0.5624	0.65596	-0.19472
2.216	23.169	13.7279	10.0311	0.12851	-0.080566	-0.067285	0.7883	17.3766	17.5494	0.074219	-0.12266	-0.0071289	28.8411	23.737	4.1557	0.043457	0.092773	0.052246	8.2812	249.438	629.163	-0.51357	0.63213	-0.16777
2.218	16.718	2.5813	25.0793	0.10645	-0.059082	-0.070801	39.822	-22.372	9.5103	0.06914	-0.12383	-0.0020507	8.508	-14.4966	7.62027	0.027344	0.104	0.052246	-22.0621	272.588	559.751	-0.4667	0.60791	-0.1458
2.22	8.235	15.5334	26.534	0.079297	-0.042578	-0.074121	28.4507	21.0674	0.133000000000001	0.072754	-0.125	0.0025391	11.311	23.639	-1.305	0.0063477	0.13232	0.057129	-85.506	203.56	493.572	-0.42334	0.57959	-0.12988
2.222	23.117	15.3406	17.0184	0.049609	-0.017578	-0.073437	38.4151	-0.679	15.9917	0.071777	-0.12207	0.013184	-11.295	-27.3263	8.124	-0.010498	0.1477	0.064941	-74.535	171.33	440.649	-0.38789	0.55235	-0.11094
2.224	19.8736	37.654	16.5526	0.019141	0.010157	-0.06836	59.422	-10.5058	13.8523	0.068848	-0.1251	0.017871	-18.388	21.221	-13.1716	-0.025879	0.15967	0.068848	-53.19	169.735	439.449	-0.35772	0.52627	-0.094629
2.226	25.958	24.4981	24.71751	-0.012012	0.036816	-0.064551	32.821	7.5666	5.5404	0.068652	-0.12793	0.026563	-12.257	-25.5128	-1.707	-0.047852	0.17822	0.075684	-36.836	182.762	423.782	-0.32568	0.4958	-0.081348
2.228	-11.22	15.1057	-2.0104	-0.039063	0.062988	-0.062012	27.7202	-26.187	3.374	0.066309	-0.12832	0.036719	-11.213	30.1789	-13.0014524	-0.054688	0.18066	0.075684	-44.3437	176.879	369.977	-0.3001	0.47227	-0.070313
2.23	-5.356	10.2968	-0.7039	-0.066113	0.086914	-0.058984	33.0875	16.4157	-5.65364	0.065527	-0.12861	0.04209	-15.372	-21.3345	5.77744	-0.072754	0.19531	0.080078	-67.614	151.1135	292.424	-0.27344	0.44629	-0.059082
2.232	17.269	9.0244	12.8411	-0.087989	0.11592	-0.05498	21.5108	21.4316	-4.7093	0.063477	-0.12891	0.050293	-39.7508	34.5548	-1.2511	-0.084717	0.20313	0.084473	-116.695	139.9001	255.536	-0.25186	0.42666	-0.051856
2.234	16.298	13.9223	27.0488	-0.11104	0.13467	-0.049902	43.0536	-8.92871	6.113	0.069727	-0.12842	0.058398	-37.0974412	-29.6425	-5.8312	-0.097168	0.20947	0.087891	-87.186	132.547	281.0446	-0.23213	0.40928	-0.042383
2.236	-12.021	14.5585	27.242	-0.12783	0.15234	-0.047657	19.7305	20.8586	0.2448	0.071972	-0.1294	0.067773	-38.5406	34.1638	-7.4112	-0.10938	0.21143	0.097656	3.6575	184.788	296.0666	-0.22119	0.39678	-0.027539
2.238	-13.305	19.9345	2.275746	-0.14355	0.17285	-0.042969	-2.021	-13.9949	-1.8913	0.077051	-0.13252	0.075586	-17.366	-4.8478	-10.93332	-0.11377	0.21631	0.097168	-32.479	177.88	277.223	-0.21602	0.38926	-0.016113
2.24	14.076	28.508	11.8056	-0.14824	0.18838	-0.037989	30.7278	-6.63301	18.1173	0.077343	-0.13184	0.080664	-6.537	60.199	0.1023	-0.12158	0.2207	0.10205	-37.2963	179.35	204.159	-0.21191	0.37891	-0.0048828
2.242	-14.221	25.9985	9.4735	-0.15381	0.1998	-0.030078	-18.3038	23.863	7.154	0.081055	-0.13379	0.083984	-13.695	4.5656	-1.0179	-0.12524	0.22387	0.10498	-78.132	158.631	160.668	-0.2125	0.37266	0.0042969
2.244	-27.5526	11.6198	14.88613	-0.15186	0.20215	-0.028516	0.421700000000001	-5.4408	-5.3374	0.086328	-0.13008	0.082422	-22.886	45.6516	-18.5084	-0.12744	0.22559	0.10791	-73.993	135.516	143.029	-0.20772	0.36797	0.016894
2.246	-23.673	9.9308	16.0864	-0.14766	0.2124	-0.016016	-9.832	25.7257	-13.28117	0.087305	-0.13057	0.079297	-19.4114	-3.802	5.45	-0.13184	0.22461	0.10742	-34.4864	145.884	157.6414	-0.21162	0.35743	0.02627
2.248	5.091	19.2881	5.4086	-0.13916	0.20068	-0.010254	-38.4411	13.1668	-18.71982	0.085351	-0.13213	0.077343	8.064	33.9801	33.5645	-0.1333	0.22021	0.10547	-12.8536	98.684	128.7501	-0.20976	0.3625	0.034766
2.25	-3.144	20.2812	5.7987	-0.12793	0.18701	-0.003125	-18.3485	-29.003	3.4044	0.081445	-0.13183	0.074804	23.729	-18.945	58.7574	-0.13281	0.20801	0.098145	-34.556	87.32755	72.8911	-0.20947	0.36133	0.040527
2.252	-25.248	10.0668	4.1207	-0.10898	0.15928	-0.00048824	-34.317	8.9209	3.051	0.077148	-0.12939	0.073242	24.732	26.495	94.415	-0.13989	0.20069	0.089111	-46.832	48.499	38.9328	-0.21191	0.36397	0.046778
2.254	2.859	8.2152	15.5737	-0.081641	0.13428	0.0041992	-26.9141	-19.5201	5.9446	0.065918	-0.12051	0.068457	4.177	4.28	85.8985	-0.14844	0.18262	0.065918	-6.0103	72.28797	45.167	-0.20937	0.36407	0.055664
2.256	-2.026	23.556	26.592	-0.054004	0.10088	0.0053711	-27.9071	-23.225	5.48644	0.052832	-0.1125	0.066113	-7.887	61.287	151.0517	-0.16406	0.17529	0.040039	-2.9902	59.5892	58.0266	-0.20703	0.3582	0.063086
2.258	1.64	29.342	18.3658	-0.023438	0.068359	0.01123	-37.297	21.5849	-0.5106	0.034863	-0.10586	0.064161	-1.1929	30.481	252.503	-0.17725	0.17139	0.029297	59.753	26.75	69.3372	-0.20664	0.35674	0.072461
2.26	-5.426	16.0156	21.1135	0.0012695	0.038379	0.0090821	-22.7238	-9.8612	-13.30104	0.011133	-0.096387	0.06377	1.0673	24.5884	340.681	-0.21826	0.1665	0.003418	31.3267	0.218400000000001	45.728735	-0.2041	0.35742	0.084473
2.262	21.06	7.9931	23.9889	0.026465	0.0055664	0.010254	-7.806	30.522	-20.192	-0.012207	-0.080078	0.064941	-15.487	-27.07	431.748	-0.26171	0.16846	-0.013672	-26.6555	-24.8239	12.4665	-0.20586	0.35645	0.089551
2.264	13.551	-1.1633	15.7562	0.043652	-0.029199	0.011426	-3.5177	31.934	-14.943	-0.03955	-0.070313	0.071485	-56.429	-6.58401	530.872	-0.31396	0.16699	-0.027832	21.2409	-0.129	13.3883	-0.20351	0.35303	0.091992
2.266	-4.291	16.6115	-7.7816	0.056836	-0.051465	0.010254	14.6088	-4.2453	-10.051	-0.066992	-0.052637	0.075586	-78.0675	-20.8778	636.104	-0.41016	0.17627	-0.037109	33.07417	2.285	37.449	-0.19844	0.35341	0.096289
2.268	33.0396	19.5537	5.4927	0.072266	-0.077637	0.0097656	4.797206	27.481	-0.9537	-0.093163	-0.037403	0.08457	-96.908	-0.636000000000003	707.5	-0.46582	0.17578	-0.042969	38.5221	26.8288	44.754	-0.19434	0.3417	0.1002
2.27	26.729	24.6958	11.8345	0.077149	-0.10137	0.013867	7.01933	4.8927	-0.2291	-0.11778	-0.020605	0.08916	-60.797	-37.811	745.659	-0.59717	0.18018	-0.045898	6.471	-25.937	-4.362	-0.1875	0.33691	0.10693
2.272	3.048	13.873	22.8929	0.085351	-0.11738	0.0080078	44.2191	-1.2682	0.504000000000001	-0.13281	-0.0048828	0.092285	-24.5736	-72.319	767.343	-0.71656	0.18042	-0.036133	36.2265	-24.578	-43.63	-0.17324	0.32949	0.11035
2.274	-10.012	11.1513	20.0949	0.094726	-0.13613	0.0044922	-3.936	33.458	-16.6109	-0.14941	0.011036	0.094336	-1.432	-105.791	780.393	-0.86719	0.17969	-0.012695	-29.7125	-10.8082	-43.318	-0.16513	0.32061	0.11807
2.276	30.1246	13.1366	30.7294	0.098634	-0.14521	0.0017578	38.5341	5.7897	-4.302	-0.16035	0.026271	0.10205	2.205	-123.351	811.654	-1.1401	0.17578	0.060547	19.519	2.5935	-1.556	-0.15537	0.3124	0.12784
2.278	32.5934	5.2335	60.8839	0.10352	-0.15088	-0.0019531	46.203	26.32584	-8.3189	-0.16543	0.045021	0.10205	30.385	-90.669	811.886	-1.2905	0.18604	0.081055	50.9912	34.0889	16.971	-0.14297	0.30449	0.14229
2.28	-5.465	-12.4652	44.935	0.11534	-0.15439	-0.0125	13.5099	18.1779	-2.0811	-0.16075	0.065236	0.104	39.71	-83.876	815.084	-1.584	0.24316	0.13379	-4.454	-17.6881	-12.659	-0.12842	0.28955	0.15381
2.282	-26.828	-19.5016	31.475	0.11953	-0.15459	-0.019726	55.577	-13.1633	10.229	-0.15332	0.078613	0.10352	36.606	-89.885	803.576	-1.7883	0.29517	0.17968	3.2816	23.192	-48.537	-0.11104	0.26992	0.16553
2.284	-8.497	-3.502	52.5782	0.12227	-0.15459	-0.031054	39.1134	4.2035	4.63386	-0.1458	0.097947	0.099704	11.374	-154.224	815.7312	-1.9741	0.34961	0.23242	-19.2057	7.4372	-38.0754	-0.090625	0.24971	0.17763
2.286	26.7214	9.8353	93.966	0.12627	-0.14903	-0.045508	25.9623	-0.00869999999999926	11.1894	-0.13291	0.10869	0.095509	8.301	-165.349	832.4027	-2.2085	0.42627	0.27246	-15.6739	69.324	-0.8043	-0.06289	0.22354	0.19091
2.288	6.852	9.95251	113.4599	0.13184	-0.14258	-0.049316	39.1801	6.3309	1.9806	-0.11455	0.11651	0.090431	-11.887	-209.681	871.258	-2.3042	0.46729	0.27246	11.263	76.505	32.0619	-0.026367	0.19024	0.20009
2.29	11.438	15.9712	150.512	0.13584	-0.13496	-0.064062	11.0889	36.435	-1.25818	-0.096392	0.12187	0.081348	8.477	-144.321	918.1351	-2.4043	0.56836	0.25635	27.1219	56.876	23.5949	0.013184	0.1543	0.2041
2.292	24.5	36.9642	211.3746	0.13759	-0.1292	-0.07666	11.0417	7.2799	9.7944	-0.068848	0.12744	0.075195	14.634	-163.403	959.835	-2.3931	0.64942	0.23535	-28.491	4.6477	-19.1865	0.06543	0.11318	0.2124
2.294	31.452	68.80347	304.5858	0.13213	-0.12334	-0.091504	17.6628	10.03529	10.1877	-0.048038	0.12792	0.065718	10.812	-118.899	946.049	-2.334	0.72656	0.20264	-40.9775	-38.287	-28.1878	0.12588	0.058985	0.20644
2.296	5.662	82.0889	378.383	0.1249	-0.10791	-0.11006	-12.73003	16.3733	11.6181	-0.024495	0.1204	0.060439	29.212	-194.23	929.294	-2.2012	0.79883	0.14111	-3.343	-10.441	15.1639	0.18955	0.0050781	0.19824
2.298	8.516	71.4918	417.767	0.11572	-0.087891	-0.12451	-2.0852	-3.2937	5.901	-0.0041755	0.11337	0.048718	61.4001	-162.114	943.981	-2.1284	0.82275	0.11035	-25.871	-11.068	45.731	0.25683	-0.052442	0.18613
2.3	33.238	50.182	430.9678	0.092187	-0.066308	-0.14619	-2.283	33.228	9.5652	0.015838	0.10751	0.040517	80.189	-227.1916	1065.5486	-2.0054	0.83838	0.04834	18.70561	27.9056	38.03	0.33154	-0.11865	0.1709
2.302	-16.576	30.4058	472.9714	0.06416	-0.032129	-0.16631	-40.252	14.7999	-2.321	0.03418	0.091797	0.027832	101.074	-176.694	1126.664	-1.9382	0.81665	0.0065917	5.5749	-7.9768	23.5968	0.45703	-0.20059	0.18438
2.304	-27.1864	11.686	521.7415	0.023535	-0.0004882	-0.18819	-25.6039	-7.7516	14.5102	0.044218	0.07893	0.01799	96.672	-252.478	1190.4602	-1.8936	0.77637	-0.014648	-19.6611	-8.5353	-12.798	0.58291	-0.30381	0.19326
2.306	-6.7088	-7.003	576.6933	-0.025293	0.035156	-0.21865	-29.6203	16.71787	10.1242	0.055601	0.067053	0.0081482	44.3898	-217.1513	1212.011	-1.8984	0.70313	-0.02832	15.1913	6.5685	13.9459	0.64072	-0.38506	0.16436
2.308	7.8193	-10.772	579.2941	-0.080566	0.072754	-0.25146	-24.7395	-18.8671	-2.5611	0.069305	0.049868	-0.0020223	-6.9269	-305.941	1253.7009	-1.9199	0.66211	-0.024902	18.618	9.2404	47.086	0.64639	-0.42539	0.10869
2.31	-12.8795	-33.025	568.0902	-0.14414	0.12002	-0.27617	-39.045	1.2543	11.8797	0.077304	0.038058	-0.012157	-21.37	-238.107	1299.979	-2.0117	0.59619	0.0024414	20.55	41.015	40.567	0.60352	-0.44531	0.046387
2.312	-26.2519	-27.05	588.8829	-0.20879	0.17392	-0.31025	-30.12	14.4678	0.855400000000001	0.083496	0.01709	-0.023926	4.9407	-229.874	1370.252	-2.1147	0.56201	0.031982	8.0912	-28.0389	7.9867	0.57784	-0.42041	-0.00019546
2.314	18.795	-23.632	633.73	-0.28184	0.23447	-0.34931	-9.7154	-15.9449	4.55242	0.093499	0.0042167	-0.033131	11.455	-106.468	1373.8531	-2.2422	0.53418	0.069824	27.3536	-13.7217	0.0620000000000012	0.60381	-0.39639	-0.033301
2.316	10.7621	3.361	659.3946	-0.36865	0.30771	-0.3833	-26.2076	14.6328	-8.4935	0.098894	-0.011968	-0.043491	10.6522	-131.573	1425.675	-2.4238	0.5293	0.10889	-23.6171	-30.0543	-7.5603	0.6499	-0.39326	-0.061035
2.318	-11.735	12.349	655.7063	-0.45947	0.38721	-0.41357	-0.655399999999998	-7.5704	14.66581	0.10036	-0.022494	-0.052048	-27.0528	-83.33	1433.202	-2.5176	0.53223	0.12646	19.362	16.3607	18.224	0.69873	-0.39463	-0.081054
2.32	-42.1846	17.5973	668.6961	-0.55693	0.48721	-0.44189	10.9316	-28.66	10.2609	0.10258	-0.031659	-0.064024	-3.86	-145.5782	1456.037	-2.6753	0.55322	0.15479	37.7228	41.87	26.7768	0.73438	-0.39258	-0.10547
2.322	-13.812	2.83754	696.406	-0.65274	0.59336	-0.45742	-18.5184	6.4754	6.8145	0.10449	-0.037109	-0.075684	36.265	-78.614	1489.937	-2.7966	0.58179	0.14941	-0.8739	31.2368	-17.732	0.74697	-0.38067	-0.12881
2.324	3.7763	-21.982	706.43	-0.75469	0.69844	-0.46953	24.22	-11.2352	4.0598	0.10558	-0.048785	-0.086573	19.19	-99.652	1514.606	-2.9155	0.62158	0.14063	24.5889	3.766	-30.619	0.73555	-0.35352	-0.1544
2.326	2.554	-32.772	708.0449	-0.85274	0.79648	-0.47246	39.272	9.8258	2.68986	0.10162	-0.055319	-0.097926	-20.56	-24.053	1516.675	-3.062	0.70557	0.10791	24.80555	-24.8118	-29.7061	0.71055	-0.3168	-0.17822
2.328	26.888	-13.219	717.381	-0.94727	0.88672	-0.46484	10.9543	25.9	-9.4632	0.10135	-0.05957	-0.10961	-50.175	-49.111	1532.336	-3.1128	0.75146	0.104	18.2344	-18.1074	-7.734	0.67461	-0.27324	-0.19365
2.33	40.887	-6.78	749.638	-1.0274	0.96983	-0.45146	36.1613	-18.0892	0.202	0.097525	-0.063796	-0.12753	-43.3425	-39.562	1540.2089993	-3.1929	0.8501	0.087891	27.50279	-31.116	25.5952	0.63525	-0.22705	-0.20605
2.332	4.787	-38.747	768.161	-1.1074	1.039	-0.4334	36.04277	1.262	21.8445	0.093262	-0.064453	-0.14307	-66.859	-100.357	1569.27	-3.2133	0.92627	0.063233	36.425	3.7765	2.216	0.58711	-0.1707	-0.21601
2.334	-2.548	-96.183	770.165	-1.1731	1.0969	-0.41699	25.8913	-26.1577	64.5131	0.085412	-0.067383	-0.17116	-63.2323	-103.08679	1597.9647	-3.2163	0.98682	0.042969	-19.8941	2.028	-23.9655	0.53291	-0.11065	-0.21739
2.336	27.418	-136.4431	800.181	-1.2223	1.1481	-0.40928	53.2842	-30.22	102.349	0.062858	-0.070904	-0.2084	-61.471	-129.195	1610.454	-3.1929	1.0571	0.015625	-3.034	29.9117	-21.8688	0.46728	-0.05166	-0.21699
2.338	69.157	-148.6523	857.0297	-1.2461	1.1914	-0.40674	35.2732	33.701	129.4019	0.027913	-0.066588	-0.23993	-66.94	-96.508	1635.545	-3.1733	1.0835	-0.00048828	28.7658	51.438	13.021	0.40088	0.0039064	-0.21065
2.34	14.733	-152.531	926.633	-1.2496	1.21	-0.41621	59.2673	10.249	172.63	-0.019587	-0.049644	-0.26514	-37.521	-93.114	1615.687	-3.1284	1.1187	-0.02002	-16.807	37.8189	27.3683	0.3335	0.062988	-0.19873
2.342	-24.896	-149.513	942.784	-1.2613	1.2261	-0.43789	70.405	23.412	213.508	-0.085938	-0.025879	-0.27881	-7.5299	-82.541	1610.477	-3.0947	1.1319	-0.028076	1.9298	38.6807	14.4942	0.28037	0.11758	-0.17715
2.344	-7.659	-164.502	971.297	-1.2707	1.2543	-0.46289	46.398	39.3131	241.41	-0.17583	0.0037182	-0.28894	28.7207	-89.915	1573.7876	-3.0757	1.1392	-0.030273	-17.6321	-12.5681	-20.087	0.25889	0.1749	-0.14404
2.346	23.639	-174.313	1007.3831	-1.2799	1.2779	-0.49043	52.78284	9.7	301.247	-0.27255	0.041164	-0.28414	24.451	-60.4027	1587.1363	-3.0586	1.1289	-0.027344	-24.356	7.476	-25.6723	0.2417	0.2167	-0.11006
2.348	25.18	-151.2354	1061.2432	-1.2793	1.3047	-0.51563	24.836	69.1725	352.8148	-0.35653	0.078071	-0.25858	-6.139	-23.7874	1563.019	-3.0522	1.1235	-0.023926	0.15	1.3	-2.21524	0.19121	0.25224	-0.079004
2.35	34.666	-127.144	1103.0369	-1.27	1.3131	-0.53388	33.3111	84.176	417.006	-0.43639	0.10261	-0.22261	6.5877	15.9519	1588.2096	-3.0366	1.1099	-0.012207	30.5176	21.7665	25.8278	0.11279	0.31006	-0.0625
2.352	73.025	-100.444	1136.281	-1.2527	1.3032	-0.55605	13.174	67.3869	504.671	-0.53662	0.12646	-0.19482	11.2898	54.963	1564.993	-3.0268	1.0869	-0.0014648	-25.651	18.7207	13.0753	0.032324	0.37715	-0.050391
2.354	58.6705	-100.879	1155.879	-1.2347	1.265	-0.57637	31.07	92.745	576.413	-0.66713	0.16503	-0.1791	41.828	44.807	1579.4327	-3.0034	1.0669	0.0092773	-20.5574	29.1681	1.179	-0.041895	0.4461	-0.045801
2.356	24.844	-103.295	1156.2242	-1.2095	1.1987	-0.59502	31.50416	33.7484	658.009	-0.81013	0.20167	-0.16487	2.436	54.0924	1494.968	-2.9648	1.0371	0.022949	14.01541	39.859	21.9905	-0.092676	0.50703	-0.040723
2.358	40.4018	-80.531	1193.652	-1.1836	1.1152	-0.60938	12.344	2.5046	732.54	-0.95736	0.25015	-0.14007	2.225	47.0201	1488.311	-2.9135	1.0175	0.030518	-27.9351	20.3396	34.1203	-0.12881	0.55869	-0.02793
2.36	72.5803	-60.615	1245.689	-1.1574	1.019	-0.61933	-8.076	-6.205	822.2814	-1.1048	0.29527	-0.1128	-1.794	105.406	1463.569	-2.8613	0.99805	0.037109	21.285453	7.60447	56.02	-0.15625	0.59619	-0.020508
2.362	54.469	-45.1835	1264.7014	-1.1387	0.93477	-0.62578	43.439	-71.873	908.4184	-1.2637	0.34375	-0.068359	-1.872	92.972	1505.76248	-2.7886	0.96924	0.03418	19.5416	-43.6375	42.1553	-0.17451	0.62266	-0.017774
2.364	7.868	-44.989	1273.5139	-1.1398	0.87265	-0.63555	60.47	-77.199	953.2799	-1.4359	0.41285	-0.011827	10.0643	116.346	1469.722	-2.7461	0.95508	0.035645	-6.1263	-45.538	-6.484	-0.18907	0.64073	-0.01123
2.366	23.678	-34.525	1299.486	-1.1559	0.83818	-0.65205	11.8005	-113.433	912.1366	-1.6615	0.48251	0.055126	25.0256	57.569	1477.00237	-2.6602	0.93262	0.039063	-6.51178	-40.31	2.1621	-0.19883	0.64502	-0.010449
2.368	60.1123	-23.684	1346.595	-1.1987	0.83936	-0.67041	5.121	-167.8581	897.317	-1.9124	0.5982	0.11523	-3.482	77.212	1423.275	-2.5974	0.91431	0.03711	21.5082	6.4015	7.429783	-0.19658	0.64844	-0.012109
2.37	35.749	-39.371	1384.191	-1.2648	0.88242	-0.6959	-50.136	-139.6701	911.653	-2.1991	0.73399	0.15944	-19.784488	54.8199	1458.0798	-2.5327	0.90283	0.041504	20.0686	24.3812	16.271	-0.19434	0.63477	-0.010254
2.372	34.023	-67.8049	1385.8194	-1.3402	0.94541	-0.71123	-55.137	-155.493	955.257	-2.5479	0.88574	0.15967	-33.2737	139.336	1432.692	-2.4414	0.87891	0.039551	13.484	7.536	11.1431	-0.18399	0.61905	-0.013477
2.374	68.397	-79.9111	1401.764	-1.4151	1.0126	-0.72998	-13.077	-120.617	1024.974	-2.8489	1.1264	0.085309	-16.1867	131.309	1423.89922	-2.394	0.86182	0.035156	43.404	17.4035	2.7859	-0.16553	0.5959	-0.020117
2.376	87.9461	-77.1185	1402.332	-1.4736	1.0776	-0.74433	-43.109	-117.641	1036.361	-2.9913	1.3381	0.031373	-33.6215	176.197	1397.047	-2.3027	0.83203	0.039551	-6.719	-13.5387	-19.0763	-0.1378	0.56895	-0.031445
2.378	57.362	-75.189	1419.1647	-1.521	1.1235	-0.75928	-48.118	-178.283	1053.1361	-2.9638	1.4581	0.01846	-19.5706	97.7284	1388.837	-2.237	0.80346	0.043701	36.848	18.1279	-5.0557	-0.10596	0.5372	-0.039551
2.38	68.655	-62.23	1418.79	-1.5739	1.1686	-0.77139	-49.892	-171.903	1080.883	-2.7976	1.5057	0.012019	-59.871	133.3517	1357.73	-2.1714	0.77393	0.048828	24.8362	6.5087	-0.561999999999998	-0.066895	0.49756	-0.052734
2.382	63.663	-64.3935	1448.4514	-1.6315	1.2115	-0.78427	-69.945	-150.1267	1076.6356	-2.5371	1.5059	-0.010254	-44.069	118.935	1352.479	-2.0874	0.73193	0.055664	-9.079	3.9866	-7.484	-0.02207	0.45957	-0.067773
2.384	37.112	-66.5666	1452.743	-1.6878	1.2505	-0.79991	-21.9374	-130.712	1122.532	-2.239	1.4113	-0.056553	-54.619	208.185	1288.8752	-2.0464	0.70947	0.05957	26.5395	0.779500000000001	-15.8889	0.019629	0.41367	-0.090723
2.386	4.983	-58.618	1424.5993	-1.7332	1.2867	-0.81524	-8.1258	-79.48	1153.631	-1.9635	1.2591	-0.11184	-34.0407	183.834	1272.837	-1.959	0.66211	0.060547	-0.296000000000001	5.8366	-5.5064	0.05791	0.36836	-0.11885
2.388	24.95	-32.542	1421.787	-1.769	1.313	-0.8335	-24.6305	-96.994	1152.931	-1.7437	1.0813	-0.1712	-51.5857	213.07	1215.34	-1.8916	0.63037	0.066163	-1.07239	22.514	33.255	0.087012	0.32236	-0.15381
2.39	59.33	-4.5067	1424.3269	-1.8043	1.3371	-0.85703	-22.1736	-127.491	1180.5436	-1.587	0.89461	-0.21339	-29.2632	153.801	1181.6278	-1.8257	0.59814	0.069824	-2.4672	3.927	78.781	0.10498	0.27051	-0.19873
2.392	4.709	-7.156	1433.5591	-1.8327	1.3579	-0.88037	-25.7797	-126.332	1199.988	-1.4917	0.71533	-0.23486	-24.812	217.356	1163.3217	-1.7339	0.55127	0.068359	16.90569	6.16	129.527	0.10156	0.23115	-0.26182
2.394	-13.479	-8.58622	1408.081	-1.8573	1.3802	-0.90966	-0.853999999999999	-182.446	1249.162	-1.4489	0.5669	-0.23155	24.6859	191.8023	1164.439	-1.689	0.53369	0.072754	-51.018	-4.788	194.44	0.079102	0.19814	-0.31563
2.396	14.171	18.5106	1382.855	-1.8804	1.4103	-0.93603	-20.3487	-179.673	1302.0417	-1.4484	0.44083	-0.21807	-23.891	252.933	1128.301	-1.5933	0.49072	0.066406	-27.29	3.2226	313.465	0.026758	0.19424	-0.35976
2.398	63.7286	17.534	1410.2666	-1.8984	1.4414	-0.96094	-51.74	-190.093	1310.176	-1.4875	0.34356	-0.19268	-17.2175	196.887	1092.59	-1.5256	0.46167	0.066162	-9.0434	-41.6851	440.004	-0.057715	0.21436	-0.39912
2.4	52.848	20.463	1438.6345	-1.9196	1.4764	-0.98955	-101.093	-248.328	1329.232	-1.5627	0.2752	-0.15137	-3.479	229.49054	1031.876	-1.4565	0.43506	0.062012	-64.996	-57.424	591.476	-0.17236	0.24805	-0.43945
2.402	69.616	22.766	1440.7273	-1.9358	1.5075	-1.0104	-80.138	-216.284	1358.822	-1.6675	0.24463	-0.104	33.7343	174.941	1005.1681	-1.3574	0.40234	0.058594	-107.8041	-59.329	790.137	-0.30205	0.29238	-0.46904
2.404	79.3927	28.13986	1449.3164	-1.9499	1.5357	-1.0261	-49.521	-219.901	1372.876	-1.8022	0.26631	-0.062402	10.708	211.8449	971.6612	-1.312	0.3833	0.058594	-162.924	-79.482	886.3438	-0.44766	0.34551	-0.49775
2.406	62.125	25.0462	1425.7735	-1.9587	1.5538	-1.0386	-17.6008	-198.41	1434.244	-1.9527	0.325	-0.039648	42.0865	171.319	928.69	-1.2148	0.35156	0.057617	-151.2235	-60.94	976.578	-0.59805	0.39825	-0.52236
2.408	50.399	13.465	1424.7948	-1.9609	1.5645	-1.0488	-9.324	-110.074	1416.757	-2.1043	0.40938	-0.029492	31.001	221.8529	870.828	-1.1318	0.32397	0.053223	-127.486	-81.081	1028.16	-0.75801	0.45879	-0.52265
2.41	72.398	8.44	1417.16868	-1.9536	1.5597	-1.0559	9.85166	-125.87	1404.399	-2.244	0.50683	-0.029492	46.136	174.941	831.564	-1.0601	0.30029	0.052734	-13.8612	-73.9	1113.42	-0.98828	0.52148	-0.47852
2.412	87.4839	17.445	1403.4164	-1.9374	1.5509	-1.0624	32.4371	-85.345	1423.956	-2.3652	0.61133	-0.038086	31.493	220.00633	788.5924	-0.95703	0.26172	0.047363	63.759	-131.411	1175.305	-1.3468	0.61162	-0.42412
2.414	75.9	6.54	1404.268	-1.9058	1.5341	-1.062	65.308	-42.326	1387.703	-2.4542	0.71553	-0.054199	69.9106	195.308	759.237963	-0.91064	0.24707	0.047363	46.603	-124.375	1170.786	-1.7757	0.74228	-0.40537
2.416	51.767	-0.890999999999998	1386.175	-1.8564	1.5054	-1.061	94.336	-87.706	1413.0913	-2.527	0.81641	-0.076074	65.231	250.381	714.1551	-0.8125	0.20801	0.04834	40.075	-139.008	1209.375	-2.207	0.92119	-0.38819
2.418	42.264	2.5981	1370.7559	-1.8003	1.4673	-1.0503	47.2849	-36.646	1439.0763	-2.5711	0.90859	-0.1042	55.462	228.8109	658.878	-0.75122	0.17968	0.046387	34.982	-168.963	1185.961	-2.5615	1.126	-0.30938
2.42	75.825	38.791	1360.1966	-1.744	1.4169	-1.0481	14.6578	-38.4514	1408.422	-2.5875	0.98752	-0.13506	24.485	262.353	606.316	-0.68604	0.15527	0.049805	69.711	-215.465	1162.468	-2.7773	1.3262	-0.18799
2.422	115.9862	58.368	1332.67	-1.6879	1.3645	-1.0281	4.5954	-75.125	1440.247	-2.582	1.041	-0.16992	6.0878	233.5583	572.875	-0.60254	0.11963	0.044434	98.115	-264.466	1168.17	-2.8501	1.4633	-0.094725
2.424	107.1277	68.892	1321.907	-1.641	1.3097	-1.014	-4.04	-9.2023	1418.765	-2.5521	1.069	-0.2043	19.015	256.74	549.61338	-0.56104	0.10107	0.056152	101.5326	-245.5517	1149.685	-2.8324	1.5266	-0.074218
2.426	82.176	79.526	1304.2901	-1.5986	1.2592	-0.99395	31.9892	-76.799	1432.779	-2.5186	1.079	-0.2417	46.557	235.06	500.47	-0.47803	0.066406	0.047852	67.34	-231.747	1180.341	-2.7199	1.5563	-0.11055
2.428	85.0752	84.332	1288.886	-1.5659	1.2134	-0.97803	46.412	-84.607	1456.7622	-2.48	1.0786	-0.26787	15.153	241.599	459.563	-0.42407	0.033936	0.045898	74.794	-193.51	1146.41	-2.527	1.5675	-0.16728
2.43	85.34264	83.224	1266.2691	-1.547	1.1819	-0.95283	27.5415	-48.462	1435.648	-2.4422	1.0664	-0.28594	-23.512	224.614	429.412	-0.37158	0.0092773	0.046387	113.367	-176.73	1107.77	-2.2988	1.5664	-0.23291
2.432	57.849	56.773	1246.6541	-1.5459	1.1593	-0.93047	51.268	-113.117	1454.343	-2.4058	1.0396	-0.28467	-3.957	243.917	400.9697	-0.31104	-0.026855	0.039063	158.54	-178.426	1146.315	-2.047	1.5296	-0.28057
2.434	40.529	54.7166	1239.675	-1.558	1.1496	-0.91523	84.441	-71.2812	1488.168	-2.372	1.0083	-0.27412	-5.306	218.058	376.479	-0.28711	-0.042969	0.039551	178.85	-194.1816	1233.632	-1.8141	1.457	-0.30742
2.436	36.128	37.533	1202.167	-1.5762	1.1502	-0.90547	77.621	-63.581	1463.184	-2.3559	0.97471	-0.27383	-5.517	210.359	377.385	-0.24219	-0.075684	0.034668	125.919	-206.955	1306.948	-1.6301	1.3441	-0.32969
2.438	24.623	37.632	1161.708	-1.5913	1.1636	-0.89795	83.057	-97.119	1472.63	-2.3486	0.94229	-0.27422	16.883	185.03	343.635	-0.20727	-0.093263	0.032959	129.252	-206.5729	1318.152	-1.5136	1.2138	-0.35381
2.44	23.898	43.5116	1125.911	-1.603	1.1794	-0.89834	46.806	-6.1	1457.2861	-2.3473	0.92383	-0.26904	1.719	170.584	316.226	-0.18018	-0.11182	0.029785	112.127	-213.525	1342.955	-1.4629	1.0781	-0.37402
2.442	22.799	49.756	1120.685	-1.6102	1.1969	-0.8957	-1.743	-35.01596	1424.476	-2.3472	0.91064	-0.2627	-30.479	173.969	276.173	-0.14795	-0.12402	0.015625	63.4833	-243.7762	1364.4467	-1.4926	0.97052	-0.39688
2.444	36.791	50.374	1114.0971	-1.6129	1.2145	-0.89766	-22.715	1.6981	1451.947	-2.3517	0.90059	-0.25566	-19.828	163.17	262.38	-0.1416	-0.12646	0.0043945	32.5353	-313.6	1405.7225	-1.5672	0.90088	-0.41494
2.446	30.785	53.677	1091.3656	-1.6004	1.2258	-0.89414	-16.384	69.317	1408.5289	-2.3507	0.89229	-0.25576	-6.317	169.902	284.415	-0.11768	-0.1499	0.0053711	27.827	-306.146	1394.281	-1.7036	0.88643	-0.43252
2.448	46.049	64.3	1050.2615	-1.5781	1.2314	-0.88086	4.267	-3.368	1415.7363	-2.3441	0.89111	-0.25224	11.297	140.344	250.564	-0.091311	-0.17431	0.018798	22.6361	-291.8	1419.843	-1.866	0.92266	-0.43555
2.45	41.252	76.003	1048.44	-1.5393	1.2186	-0.86856	-11.3398	41.9871	1414.856	-2.3288	0.88994	-0.25498	1.063	133.1427	202.375	-0.066406	-0.19531	0.03418	-9.3222	-230.563	1443.768	-2.0444	0.98877	-0.43896
2.452	48.704	99.329	1040.736	-1.4914	1.1965	-0.85078	-25.223	35.203	1367.0358	-2.3081	0.88818	-0.26025	12.079	115.7836	163.254	-0.054199	-0.23242	0.033691	19.7755	-187.389	1468.063	-2.2181	1.0773	-0.44307
2.454	32.867	114.152	1008.6563	-1.4359	1.1684	-0.83359	-19.9279	11.081	1377.6126	-2.2799	0.88291	-0.26787	-5.391	135.159	155.078	-0.042969	-0.24365	0.041016	17.0462	-150.765	1475.394	-2.3668	1.1793	-0.45195
2.456	11.73	114.189	968.6965	-1.3748	1.1342	-0.81172	1.843	94.196	1356.3166	-2.2421	0.88037	-0.27178	30.775	124.26	154.274	-0.03418	-0.25	0.039063	14.386	-107.283	1510.8619	-2.4773	1.2828	-0.45859
2.458	-0.208000000000002	107.2095	941.812	-1.3179	1.1021	-0.78369	16.415	50.5158	1336.243	-2.2003	0.87529	-0.27881	34.473	128.802	110.4189	-0.023926	-0.25073	0.035156	-26.519	-110.006	1560.884	-2.547	1.385	-0.47588
2.46	5.8	100.87182	927.5699	-1.264	1.0751	-0.76123	50.2868	53.75466	1351.8911	-2.1588	0.86504	-0.27754	28.5772	63.499	67.5567	-0.020996	-0.24902	0.036133	-69.457	-61.902	1575.337	-2.5898	1.4824	-0.50293
2.462	34.757	94.8708	895.9782	-1.218	1.0445	-0.73291	32.3054	76.008	1320.8241	-2.1162	0.85449	-0.28125	46.5276	76.7103	71.276	-0.021973	-0.23438	0.02832	-101.15	-20.82	1574.899	-2.6013	1.5643	-0.53603
2.464	25.801	94.3302	881.725	-1.1778	1.0175	-0.70674	-2.016	-0.9662	1333.027	-2.0722	0.83955	-0.28467	49.47721	33.772	81.507	-0.020996	-0.23242	0.028809	-89.687	1.752	1537.146	-2.598	1.6352	-0.571
2.466	30.812	108.1179	843.8614	-1.1376	0.99327	-0.6833	36.5936	59.17	1358.497	-2.0316	0.82657	-0.28594	40.248	84.712	67.6314	-0.012695	-0.21436	0.030273	-119.502	-16.683	1532.384	-2.5745	1.6899	-0.60146
2.468	46.9681	110.69	825.0471	-1.103	0.96533	-0.65918	7.4668	52.12	1308.2174	-1.986	0.81601	-0.28554	45.52554	37.3121	56.545	-0.0090332	-0.20801	0.030274	-137.356	-52.753	1526.3526	-2.5464	1.7161	-0.63731
2.47	42.2099	105.737	815.72	-1.0682	0.94356	-0.6334	13.905	15.329	1293.002	-1.9434	0.80576	-0.28349	17.481	53.2938	3.434	-0.0039063	-0.19775	0.034668	-75.2463	-57.4063	1511.597	-2.5112	1.7231	-0.66357
2.472	51.6256	106.791	795.523	-1.0396	0.91601	-0.60996	11.3978	75.62	1238.928	-1.8926	0.78711	-0.2793	36.0759	-16.716	13.6352	0.0024414	-0.19141	0.04541	-42.4799	-71.734	1557.15	-2.4855	1.7103	-0.67988
2.474	60.8898	111.549	777.695	-1.0068	0.89258	-0.58262	2.64	26.305	1173.6367	-1.84	0.7748	-0.27422	25.1087	24.8126	-9.1153	0.0039063	-0.18701	0.04541	-18.8372	-63.656	1573.945	-2.4656	1.6894	-0.68261
2.476	62.2124	117.034	756.291	-0.9794	0.86788	-0.55762	21.095	55.2613	1183.481	-1.7863	0.76065	-0.26504	29.21265	-10.6462	21.3657	0.0048828	-0.17822	0.060547	-18.556	-85.842	1580.259	-2.4605	1.6726	-0.67129
2.478	14.871	125.151	732.929	-0.95508	0.84766	-0.53906	34.281	119.291	1136.1183	-1.7327	0.75166	-0.26035	-1.5	33.191	12.136	0.0029297	-0.17114	0.067139	10.9765	-109.963	1580.179	-2.4624	1.6532	-0.65107
2.48	-8.958	116.2426	708.0075	-0.92813	0.825	-0.52031	49.448	47.716	1102.421	-1.6807	0.73926	-0.25176	15.5893	-26.625	7.894	0.0019531	-0.15771	0.07666	32.1885	-87.722	1541.585	-2.4707	1.6406	-0.62695
2.482	6.492	101.502	677.9031	-0.90527	0.80821	-0.50566	37.843	98.084	1110.2926	-1.6226	0.73096	-0.24365	-25.784	8.8513	-21.5731	0.00048828	-0.14648	0.083984	40.097	-23.555	1534.791	-2.4754	1.6375	-0.59258
2.484	13.329	96.318	644.7051	-0.87481	0.78633	-0.4873	21.7762	106.818	1045.147	-1.5651	0.71767	-0.2415	-18.573	-21.9933328	-12.006749	-0.00048828	-0.13721	0.092773	62.7778	19.1597	1502.6548	-2.4706	1.636	-0.55498
2.486	2.185	103.8122	616.1235	-0.84687	0.76758	-0.46836	40.6998	93.6298	1036.674	-1.5034	0.70478	-0.22607	-13.153	42.4129	-10.964	0	-0.12354	0.1001	33.6284	55.262	1466.931	-2.4514	1.6302	-0.52607
2.488	-5.28	109.9595	595.897	-0.81982	0.74854	-0.45264	44.831	190.162	1006.5489	-1.4417	0.69072	-0.21631	3.8786	9.4069	18.0581	-0.0036621	-0.11303	0.1084	51.351	86.632	1427.345	-2.4127	1.6123	-0.49804
2.49	-12.863	112.7193	551.718	-0.78936	0.729	-0.43643	1.3051	137.7488	968.336	-1.3825	0.67881	-0.20557	-20.719	47.0469	3.1391	-0.0083008	-0.1084	0.11523	40.672	61.754	1429.8477	-2.3652	1.582	-0.47461
2.492	4.614	117.134	519.6935	-0.75811	0.70518	-0.41944	-23.9574	127.759	982.936	-1.3237	0.66748	-0.19043	-33.68	-2.7809	-23.6095	-0.0092773	-0.095703	0.125	59.49	99.471	1392.654	-2.2991	1.5377	-0.4502
2.494	7.676	125.366	503.7836	-0.73311	0.6833	-0.4042	-28.8992	138.131	928.593	-1.2694	0.65264	-0.17686	-55.84472	47.932	-30.706	-0.0083008	-0.089844	0.12988	67.634	120.619	1370.505	-2.2242	1.4867	-0.42696
2.496	-10.411	119.577	478.8855	-0.70322	0.65654	-0.38291	-53.21	61.764	900.3434	-1.2199	0.6332	-0.16104	-33.565	18.66777	-21.434	-0.010742	-0.086426	0.14209	59.933	160.0252	1332.132	-2.1524	1.4258	-0.40039
2.498	-18.6182	122.935	462.0746	-0.67236	0.62939	-0.36865	-42.021	127.3966	884.664	-1.1723	0.61523	-0.14345	-26.124	63.441	15.84936	-0.012207	-0.082031	0.1499	30.785	171.28	1279.454	-2.08	1.3618	-0.37353
2.5	-19.0571	122.602	435.55482	-0.63809	0.60234	-0.35019	-42.523	117.9778	815.596	-1.1289	0.59824	-0.13174	-10.925	41.581	45.441	-0.013672	-0.081543	0.15869	18.037	159.0056	1295.0811	-2.0098	1.2949	-0.34668
2.502	-37.2781	121.0183	423.705	-0.60859	0.57461	-0.33262	-57.704	96.319	784.056	-1.0835	0.58252	-0.11377	-34.678	59.119	8.0607	-0.011719	-0.077148	0.1543	28.4126	191.514	1265.03	-1.9407	1.2339	-0.32412
2.504	-43.2289	122.361	411.3507	-0.57461	0.54727	-0.31465	-38.824	178.529	760.192	-1.0428	0.56465	-0.10303	-1.1281	11.2083	10.5068	-0.011718	-0.080079	0.15893	45.385	180.297	1277.142	-1.8737	1.1743	-0.30303
2.506	-38.2704	103.1924	391.8358	-0.54492	0.51738	-0.29453	-38.0608	123.3092	735.9	-1.0043	0.54375	-0.090137	-6.824	28.3254	20.3892	-0.0097656	-0.080566	0.1582	8.177	185.676	1249.902	-1.798	1.1149	-0.28505
2.508	-23.4465	110.642	352.1052	-0.51514	0.4917	-0.27686	-19.773	156.121	752.386	-0.96211	0.525	-0.078809	0.468	-1.6728	25.662	-0.011719	-0.078613	0.16357	-34.185	191.605	1224.7623	-1.7226	1.0572	-0.2667
2.51	-33.4429	100.081	335.092	-0.49082	0.46094	-0.25684	-36.7159	210.923	708.095	-0.92256	0.5124	-0.066309	16.576	23.6233	36.6688	-0.0092773	-0.077637	0.1582	-35.4841	201.543	1225.312	-1.644	1.0024	-0.25146
2.512	-21.20827	84.1383	336.053	-0.46172	0.43008	-0.23594	-38.7891	154.1792	679.6292	-0.896	0.49854	-0.063965	35.879	5.0914	20.8545	0.00048828	-0.080078	0.1543	-22.2074	196.879	1200.627	-1.5622	0.94287	-0.24043
2.514	-10.239	68.9458	320.172	-0.44336	0.39532	-0.22031	-51.504	199.36	644.89	-0.85918	0.48789	-0.04961	13.829	12.064	4.9532	0.0036621	-0.077637	0.15601	-29.0659	191.6244	1197.477	-1.4804	0.8791	-0.22822
2.516	-3.549	74.6558	289.709	-0.41836	0.36875	-0.2002	-80.003	194.3374	587.812	-0.80849	0.47041	-0.029688	30.2568	-6.1262	13.4418	0.016113	-0.080078	0.14307	-12.8878	164.5471	1142.372	-1.4043	0.81778	-0.21884
2.518	-0.9597	73.4158	266.724	-0.39453	0.34033	-0.18115	-39.347	151.686	569.227	-0.76709	0.44463	-0.017188	34.201	-6.69147	35.214	0.025391	-0.080566	0.13867	-40.45	178.147	1093.208	-1.3286	0.75732	-0.20762
2.52	-5.14	69.2976	260.0347	-0.37226	0.31016	-0.16875	-35.173	200.6263	532.162	-0.7209	0.42304	-0.003125	24.8512	14.46388	21.1368	0.034668	-0.083984	0.13379	-48.149	233.809	1046.332	-1.2573	0.69385	-0.19678
2.522	-4.601	64.8323	246.8937	-0.34922	0.28359	-0.16025	-47.915	140.26	506.036	-0.68311	0.39893	0.0043945	22.259	11.8662	39.502	0.052734	-0.085449	0.12012	-48.7588	246.7884	1007.628	-1.1883	0.63535	-0.18535
2.524	-2.312	76.6343	236.90193	-0.32227	0.26328	-0.14853	-25.6509	152.7284	495.361	-0.65195	0.37607	0.0033203	35.6426	23.6432	9.3226	0.06958	-0.087647	0.10718	-24.783	260.485	954.7839	-1.121	0.579	-0.17559
2.526	-1.0299	85.848	219.1533	-0.29922	0.24336	-0.1375	-21.4737	178.911	452.784	-0.61475	0.3584	0.018262	26.461	4.4713	23.648	0.086426	-0.098145	0.090332	-2.32100000000001	216.573	889.3133	-1.0585	0.529	-0.16543
2.528	1	79.56	206.1846	-0.27051	0.22705	-0.12891	-18.8194	116.581	440.5488	-0.57842	0.33926	0.026856	18.8621	12.4637	8.1417	0.10693	-0.10596	0.07959	11.745	222.179	843.6413	-0.99168	0.48067	-0.16133
2.53	1.869	72.0404	193.99	-0.24882	0.21152	-0.11934	23.8853	159.361	430.8107	-0.55137	0.31836	0.033594	15.291	-11.6355	-5.1651	0.11572	-0.1123	0.072754	18.05811	244.7127	815.267	-0.92285	0.43018	-0.15674
2.532	-12.271	80.4443	172.3831	-0.22168	0.2002	-0.11142	17.725	138.676	389.118	-0.52539	0.29688	0.047363	20.3242	18.29811	-9.60985	0.13232	-0.11865	0.056152	18.507	252.82153	796.292	-0.85313	0.39072	-0.15127
2.534	8.669	80.1292	155.549	-0.1916	0.18457	-0.10166	-9.2233	114.1383	389.9917	-0.49834	0.28027	0.052149	-2.307	-2.228	5.9089	0.14527	-0.12427	0.044433	55.8988	300.499	775.683	-0.78438	0.34668	-0.14336
2.536	18.7519	77.737	141.4835	-0.16475	0.16885	-0.097754	2.754	174.763	361.4492	-0.46914	0.25859	0.060157	-3.055	17.5858	-0.609999999999999	0.15381	-0.12646	0.034668	61.2688	266.8024	691.756	-0.71562	0.30918	-0.13829
2.538	19.716	64.544	125.133	-0.13525	0.15723	-0.093262	-30.2381	115.8813	341.6277	-0.44688	0.23828	0.063672	-16.257	-23.025	-1.51	0.16113	-0.12939	0.028809	81.964	240.637	637.195	-0.64316	0.26709	-0.13447
2.54	-8.6503	47.9663	117.4006	-0.11025	0.14619	-0.087012	-8.8447	123.9553	339.204	-0.42197	0.21797	0.075293	-18.4599	0.3748	-12.365	0.16309	-0.12744	0.023926	68.4099	212.524	573.62	-0.57422	0.22998	-0.12891
2.542	-9.764	39.4592	96.6081	-0.084082	0.13731	-0.084375	-3.9379	136.694	286.872	-0.39844	0.20068	0.082031	-16.388	-33.4904	14.8135	0.16309	-0.12451	0.017578	77.1963	217.525	552.569	-0.50625	0.18975	-0.12617
2.544	-4.489	50.617	74.9804	-0.058691	0.12012	-0.078906	-32.5118	80.941	256.7293	-0.38379	0.18096	0.091407	-36.1455	16.38676	-13.6653	0.15748	-0.12598	0.014648	124.777	220.5126	533.9476	-0.42617	0.15293	-0.14472
2.546	3.944	51.809	63.228	-0.034277	0.11162	-0.073437	-28.1994	124.1995	243.241	-0.36836	0.16172	0.098633	-35.5083	-7.0583	-4.6479	0.14746	-0.12451	0.0063477	91.932	189.887	475.957	-0.37891	0.13184	-0.17559
2.548	-7.851	64.452	64.2103	-0.015625	0.10107	-0.074219	-20.1122	93.80352	207.8484	-0.35156	0.14414	0.10684	-11.155	53.222	-14.5041	0.14063	-0.12061	0.00097656	85.012	163.5128	431.181	-0.33887	0.10518	-0.17949
2.55	-23.863	55.257	67.036	0.0040039	0.086328	-0.071484	-44.515	66.0246	199.564	-0.34443	0.13203	0.11036	-5.484	8.5881	-2.0788	0.13232	-0.11865	0.0043945	111.975	138.426	385.919	-0.2915	0.057129	-0.16455
2.552	-21.4491	39.8442	49.8202	0.027441	0.075391	-0.066406	-21.811	108.35	181.358	-0.34375	0.125	0.11377	-25.316	43.0861	-8.0654	0.12158	-0.10449	-0.0058594	102.8218	193.181	355.905	-0.23467	-0.0072266	-0.15039
2.554	-17.6386	41.21	55.5674	0.041113	0.063281	-0.064063	-23.2283	63.1069	151.988	-0.33945	0.11992	0.11338	-23.7203	4.3902	10.6553	0.11792	-0.095214	-0.0065918	66.127	211.455	344.7013	-0.17158	-0.070214	-0.13721
2.556	-9.725	36.012	69.5472	0.056153	0.050977	-0.055371	-33.3057	98.731	150.62	-0.32647	0.11367	0.12071	-26.67	53.259	-27.392	0.10986	-0.09082	-0.013672	82.644	243.75	326.486	-0.10557	-0.12841	-0.12978
2.558	-15.812	29.436	45.06684	0.076172	0.041504	-0.055664	-15.181	128.573	132.064	-0.30342	0.10859	0.12891	-14.2545	18.8305	14.3322	0.104	-0.078125	-0.018555	51.1321	201.996	268.305	-0.046192	-0.17197	-0.13232
2.56	-17.133	28.262	17.23106	0.088965	0.022852	-0.045605	-39.454	62.9256	124.1037	-0.28711	0.10078	0.12637	1.611	63.349	16.4189	0.098145	-0.071777	-0.024902	27.859	159.5312	221.96	0.0083008	-0.20068	-0.1416
2.562	-4.389	33.806	-9.4173	0.10293	0.0079101	-0.043946	-25.8256	97.493	121.069	-0.2666	0.10107	0.11865	3.925	10.4054	15.66394	0.088867	-0.064941	-0.040527	33.318	144.078	196.2903	0.054785	-0.22344	-0.1542
2.564	9.871	35.4855	-2.3331	0.12012	-0.0088863	-0.03457	-28.5597	51.8503	90.12793	-0.24512	0.09883	0.11367	0.597000000000001	46.3608	-11.21057	0.085693	-0.059814	-0.04834	-3.101	134.284	197.807	0.088868	-0.23565	-0.17187
2.566	5.217	16.86431	16.6603	0.13466	-0.023144	-0.028223	-47.2741	8.303	81.2138	-0.21211	0.08877	0.10967	20.9335	4.7327	-7.7228	0.083496	-0.059082	-0.064941	-3.325	169.69	182.295	0.11309	-0.24111	-0.18047
2.568	-11.366	10.083273	6.9484	0.1416	-0.034668	-0.02832	-28.728	66.1568	53.8603	-0.18789	0.090723	0.10263	13.88	51.364	-1.874	0.07373	-0.052734	-0.081055	-13.727	151.527	135.638	0.12695	-0.24863	-0.19229
2.57	-1.531	24.1376	5.5767	0.15322	-0.049804	-0.022754	-12.0385	17.799	32.798	-0.15967	0.085938	0.095801	30.1702	15.5863	52.322	0.070801	-0.051758	-0.087891	-18.3936	138.709	89.3445	0.12891	-0.25195	-0.20703
2.572	16.123	23.913	22.7597	0.1623	-0.065528	-0.020996	-3.794	29.66659	41.07253	-0.12842	0.078613	0.087891	45.333	31.728	32.899	0.062012	-0.050293	-0.11133	-22.4824	94.46625	81.7919	0.11406	-0.24512	-0.21064
2.574	14.056	10.4503	31.568	0.16933	-0.083105	-0.011231	8.6331	42.118	15.791	-0.093358	0.067871	0.08457	33.95196	-8.2414	33.002	0.052002	-0.050293	-0.12842	-30.079	87.5048	105.398	0.093164	-0.23447	-0.21172
2.576	11.688	10.3894	30.3352	0.17324	-0.094334	-0.005957	21.8882	-25.973	15.0389	-0.067871	0.055664	0.075586	21.03	11.1383	20.5583	0.041504	-0.049316	-0.13818	-28.8762	77.21985	92.044	0.066211	-0.22236	-0.20781
2.578	16.671	20.2326	17.83671	0.17578	-0.11035	-0.00097656	7.9063	28.887	19.8427	-0.040528	0.045117	0.069336	23.7708	-14.6304	18.2564	0.022949	-0.053223	-0.15186	-63.2061	53.2343	70.58	0.026758	-0.2039	-0.204
2.58	24.1439	25.88198	6.9195	0.17041	-0.12178	0.0033203	28.573	22.1896	8.0551	-0.0084963	0.031054	0.067481	6.786	31.093	21.187	0.015137	-0.055664	-0.1582	-31.1498	50.629	57.825	-0.013672	-0.17773	-0.19775
2.582	5.557	9.868	13.3409	0.16289	-0.1334	0.003125	40.4039	2.941	20.0155	0.019531	0.012695	0.060547	17.8077	13.6103	21.5062	-0.0053711	-0.062988	-0.17041	-9.5023	20.8236	67.602	-0.045605	-0.1459	-0.18369
2.584	22.254	5.8597	18.6426	0.15078	-0.14902	0.0070312	29.7496	61.454	0.55	0.048926	-0.00029294	0.048926	21.303	20.9206	0.48	-0.024659	-0.065186	-0.18042	-3.0005	15.48894	59.43	-0.07705	-0.11103	-0.17051
2.586	19.63	21.3096	8.32193	0.13877	-0.1582	0.0092774	23.8563	-2.648	-13.4275	0.077636	-0.01875	0.050586	21.226	-10.078	26.041	-0.041016	-0.0625	-0.18408	-3.398	-1.983	55.391	-0.10674	-0.073926	-0.15293
2.588	39.827	17.2462	3.5408	0.12109	-0.16113	0.012207	33.4273	8.737	-0.343984	0.10693	-0.034766	0.047461	-18.476	-12.9816	37.2606	-0.06543	-0.068848	-0.20264	14.586	20.929	23.8254	-0.14531	-0.033984	-0.13799
2.59	19.291	16.0209	11.8875	0.10937	-0.16406	0.01123	12.4172	34.604	-10.25735	0.13164	-0.048828	0.049317	-4.108	-47.282	59.921	-0.077637	-0.071777	-0.21143	28.8032	6.89	3.566	-0.18262	0.0073242	-0.12402
2.592	14.13	9.5589	20.1747	0.089453	-0.16279	0.010742	-2.9476	-9.6665	0.563800000000001	0.15283	-0.0625	0.048828	-22.532	-42.989	78.676	-0.10059	-0.080566	-0.23535	33.901676	9.78	-6.689	-0.21465	0.049512	-0.10762
2.594	-4.662	10.23161	39.1739	0.080078	-0.1503	0.0083985	34.7698	36.56	2.9023	0.16904	-0.080078	0.03916	-42.272	-48.464	101.394	-0.11987	-0.079346	-0.25244	29.8432	-2.5938	-14.0279	-0.24522	0.089259	-0.091699
2.596	-18.1452	15.6949	16.9245	0.063672	-0.13829	0.0035157	22.358	3.5301	-34.048	0.18652	-0.094824	0.03877	-11.624	-23.6445	154.4834	-0.14404	-0.077148	-0.26709	36.4011	-39.339	-29.444	-0.2667	0.12559	-0.076855
2.598	-1.369	23.0231	7.7156	0.04834	-0.12061	-0.0019531	4.287	-23.8233	-6.634	0.20449	-0.11279	0.035254	3.632	-17.975	169.206	-0.18652	-0.066895	-0.28809	70.402	-24.1775	-0.44941	-0.28594	0.15566	-0.059668
2.6	0.0799999999999983	26.7247	4.5914	0.039941	-0.10478	-0.008789	24.292043	25.082	-15.7324	0.21358	-0.12803	0.029395	-8.402	-13.312	208.571	-0.21582	-0.061523	-0.29736	65.249	-12.77984	-19.2498	-0.29736	0.17676	-0.048828
2.602	-13.843	22.7947	14.4637	0.031347	-0.091016	-0.016699	8.7959	-18.9824	-13.3823	0.21973	-0.13672	0.021484	-10.549	-8.35176	246.196	-0.28711	-0.058594	-0.30664	39.982	48.987	-14.709	-0.30117	0.19736	-0.03125
2.604	-11.911	19.3174	0.433800000000001	0.028223	-0.075781	-0.024121	-3.4459	19.2726	19.2591	0.22559	-0.14795	0.011719	-6.154	-0.6873	325.464	-0.35474	-0.047852	-0.31348	64.158	54.242	-9.473	-0.29854	0.21054	-0.011035
2.606	-17.073	13.6413	-5.6177	0.031055	-0.058985	-0.031055	-0.8263	44.975	3.2465	0.23105	-0.15693	-1.2e-08	-36.4509	49.1776	395.6363	-0.42578	-0.03125	-0.31152	43.0671	54.364	1	-0.29229	0.21484	0.006543
2.608	9.708	18.9413	11.0665	0.030762	-0.044922	-0.039063	-26.1911	-6.2122	16.03577	0.24316	-0.16865	-0.0097653	-14.839	60.0354	481.101	-0.54297	-0.0083008	-0.30273	38.4648	36.2	-16.5474	-0.28028	0.20811	0.020508
2.61	-6.747	4.26072	34.3765	0.037207	-0.026758	-0.053125	-19.3225	32.646	13.10612	0.24893	-0.18174	-0.023145	12.044	96.1534	545.134	-0.60303	0.0043945	-0.29248	31.2677	10.7873	3.1068	-0.26074	0.19336	0.033691
2.612	-18.991	2.5834	17.1887	0.040332	-0.0054687	-0.06543	-12.3621	11.2942	-13.2228	0.25244	-0.18604	-0.026855	-14.0916	63.57	647.736	-0.75	0.022949	-0.26514	45.285	8.5037	1.7847	-0.23321	0.15937	0.04209
2.614	-16.569	5.109809	13.5549	0.046191	0.010156	-0.079492	-36.71538	12.971	-0.127000000000001	0.24854	-0.18809	-0.038965	-28.725	76.74	698.837	-0.91211	0.031006	-0.22168	9.198	8.8185	-4.8446	-0.20234	0.12022	0.044434
2.616	1.883	24.7498	0.6317	0.053907	0.027344	-0.088379	-11.920151	49.538	-3.39047	0.24306	-0.18682	-0.049414	-18.1156	24.811	754.614	-1.0952	0.046387	-0.17969	-9.619	13.212	27.4164	-0.16562	0.075683	0.049121
2.618	-9.934	22.8796	5.7618	0.067383	0.036133	-0.099121	-16.27506	-9.8581	-3.9619	0.2415	-0.18174	-0.05332	-2.711	27.737	802.0303	-1.3696	0.095703	-0.13818	-18.1455	-8.085	12.1454	-0.12949	0.026563	0.055176
2.62	-16.389	18.9894	26.633	0.080761	0.047852	-0.11094	-20.1829	1.69	27.482	0.2331	-0.17412	-0.057422	50.159	-46.427	872.091	-1.5054	0.13428	-0.10791	-36.7412	2.276	4.4311	-0.094727	-0.011719	0.057129
2.622	5.167	9.55543	3.5255	0.093457	0.048633	-0.11504	9.4824	18.96057	0.4109	0.21875	-0.16699	-0.057129	72.9758	-52.864	862.754	-1.7637	0.2334	-0.016113	-13.411	1.45	3.4892	-0.064356	-0.051758	0.058789
2.624	6.966	18.7194	1.1145	0.11455	0.052539	-0.11426	7.7561	-17.918	11.3917	0.20381	-0.15127	-0.054199	62.22383	-131.212	879.481	-1.9685	0.32251	0.044433	-34.129	19.81484	9.1203	-0.034472	-0.081836	0.071191
2.626	14.385	19.3403	20.5707	0.13467	0.051856	-0.11484	18.7376	28.873	23.688	0.19229	-0.13604	-0.052441	20.6104	-112.801	808.0244	-2.187	0.42139	0.10547	-49.988	31.7597	32.7899	-0.01416	-0.11035	0.08877
2.628	3.552	10.0028	25.615759	0.15283	0.047852	-0.12061	-4.73543	15.4869	-8.4091	0.18213	-0.12119	-0.050097	3.585	-152.478	842.529	-2.4409	0.55811	0.13379	-55.887	-14.1004	44.28782	0.012695	-0.14131	0.11582
2.63	22.215	14.1269	21.3994	0.17276	0.043262	-0.12002	-8.345	-2.6944827	11.337	0.16719	-0.10927	-0.046777	-15.523	-121.181	875.967	-2.5308	0.63525	0.12793	-25.7787	-13.2228	25.1892	0.027344	-0.16895	0.13379
2.632	16.838	20.1748	2.9051	0.18799	0.038965	-0.12305	24.37	25.1071	10.4918	0.15918	-0.095215	-0.04248	-16.584	-152.366	921.903	-2.5874	0.78369	0.095703	-25.093	-23.681	2.618	0.035156	-0.19404	0.14795
2.634	18.357	22.0139	7.2356	0.19736	0.039356	-0.12656	11.9178	-32.307	3.4971	0.15469	-0.083692	-0.04668	-32.8697	-117.069	949.91	-2.5125	0.87867	0.046631	-37.3809	5.654	23.8058	0.037011	-0.21045	0.15215
2.636	11.04	23.1693	16.2488	0.20293	0.035742	-0.12881	33.3192	-14.835	35.433	0.15606	-0.076172	-0.038574	-32.0864	-194.67	979.309	-2.3628	0.93994	-0.014648	-20.27958	28.0104	20.5693	0.034668	-0.21748	0.15371
2.638	16.197	10.8281	12.0592	0.20654	0.039063	-0.13135	20.694	10.7418	12.5813	0.15371	-0.06875	-0.046778	-84.747	-176.084	973.521	-2.1152	0.95313	-0.1084	-38.405	22.2122	14.0059	0.042773	-0.21934	0.14756
2.64	1.289	22.8553	4.709	0.21123	0.035156	-0.12393	7.4776	-20.4194	4.0371	0.15772	-0.065137	-0.048242	-80.752	-206.5265	1037.142	-1.9922	0.93555	-0.15039	-12.72633	11.3897	-3.3156	0.063965	-0.22412	0.14404
2.642	7.162	8.5597	-1.161	0.21416	0.036816	-0.12383	47.781	30.278	8.71343	0.16016	-0.058105	-0.054688	-48.0932	-152.911	1054.3624	-1.8125	0.84863	-0.21924	6.715	-12.6116	0.2125	0.092186	-0.22959	0.1334
2.644	22.13	9.1815	9.631	0.21611	0.040723	-0.1211	30.3812	0.8977	-11.0539	0.1665	-0.057324	-0.060449	-7.601	-156.653	1111.07903	-1.7285	0.70703	-0.26465	38.16546	-14.9988	5.9	0.12442	-0.24131	0.12041
2.646	11.398	5.1172	26.969	0.21338	0.046582	-0.11611	29.9906	-12.3636	0.9358	0.17304	-0.047949	-0.06543	-24.658	-124.675	1138.856	-1.7241	0.62549	-0.27295	37.8401	-14.147	4.0428	0.15996	-0.25381	0.10518
2.648	2.725	5.12862	28.30679	0.21191	0.049805	-0.10889	44.561	25.2668	-14.7439	0.18164	-0.043261	-0.074414	-71.615	-175.758	1142.1054	-1.7617	0.47852	-0.25098	0.30565	-8.249	-17.2772	0.1877	-0.27422	0.08125
2.65	-5.409	10.0318	5.0213	0.20586	0.063086	-0.10596	-0.4638	-19.7153	-19.9447	0.1835	-0.040039	-0.077246	-49.144	-177.542	1155.092	-1.8262	0.38061	-0.22167	46.357	-4.567	-10.1012	0.21387	-0.29297	0.052734
2.652	6.9	14.4974	0.767954	0.19902	0.076562	-0.098633	7.2246	3.0642	-1.8663	0.18994	-0.031738	-0.085938	-37.626	-221.919	1231.5618	-1.9155	0.30713	-0.17871	61.938	1.726	4.0254	0.2335	-0.31416	0.018457
2.654	3.601	30.6897	5.7349	0.19863	0.094141	-0.094726	0.6312	15.962	-11.51	0.18935	-0.026953	-0.084864	-60.7049	-214.432	1271.052	-2.0601	0.2583	-0.1167	79.271	7.3599	7.196	0.25439	-0.32979	-0.015918
2.656	-16.878	21.1243	16.267	0.19316	0.11035	-0.091211	-8.525	-27.672	3.1212	0.18906	-0.017285	-0.085352	-82.429	-244.69	1324.598	-2.1406	0.26074	-0.088867	68.636	27.0629	-11.723	0.26807	-0.34151	-0.053027
2.658	-5.173	22.253	-9.4412	0.18555	0.12695	-0.088867	10.325	20.9565	3.8849	0.18047	-0.0094726	-0.087304	-93.086	-224.4	1327.285	-2.3081	0.30127	-0.039551	37.5635	33.1397	-19.9553	0.27763	-0.34639	-0.08994
2.66	-1.877	20.2444	6.5692	0.1833	0.14228	-0.08584	-19.4721	7.926	-14.9221	0.17588	0.0050781	-0.082226	-91.047	-218.996	1351.3632	-2.4304	0.36596	-0.018555	21.0305	21.578	-12.4364	0.27393	-0.34277	-0.12451
2.662	-18.6676	17.0782	53.7045	0.18252	0.15274	-0.083984	-15.5761	-1.3857	7.8634	0.16895	0.0097656	-0.083496	-75.537	-193.051	1387.753	-2.5449	0.44531	-0.011719	44.146	36.548	12.2369	0.26387	-0.3334	-0.16025
2.664	-34.4332	-22.71141	111.4502	0.17822	0.16367	-0.082812	-15.17228	28.459	-4.9437	0.15391	0.022851	-0.07959	-32.5624	-151.433	1407.262	-2.6812	0.55615	-0.034668	47.793	8.46688	6.016	0.24297	-0.30869	-0.18448
2.666	-23.578	-41.5351	140.336	0.17627	0.17441	-0.079785	-13.8818	-11.15049	-14.0086	0.14033	0.036035	-0.074414	11.119	-96.58	1442.52	-2.7358	0.61768	-0.04248	36.9947	10.8364	2.818	0.21445	-0.27588	-0.19776
2.668	-21.2704	-22.315	158.636	0.17285	0.18115	-0.081055	-12.7247	-11.8807	-7.0075	0.12627	0.049707	-0.066992	48.4722	-62.621	1459.5282	-2.8223	0.72656	-0.087891	19.8038	-3.4145	1.14807	0.179	-0.23321	-0.20703
2.67	-53.484	4.215	204.927	0.17373	0.18457	-0.079004	-7.9148	0.7489	-26.4656	0.10986	0.063086	-0.059473	56.1063	-47.633	1466.515	-2.868	0.80103	-0.12671	-33.3304	9.67358	-3.097	0.1333	-0.18799	-0.21436
2.672	-69.409	-19.387	297.371	0.17364	0.18818	-0.085059	-16.2374	-11.3633	-10.2943	0.095215	0.071289	-0.05127	72.148	-31.887	1474.2167	-2.896	0.86182	-0.16992	-21.9769	30.7059	9.6258	0.082714	-0.13926	-0.21553
2.674	-73.742	-58.421	351.1838	0.17207	0.1917	-0.086621	-12.9243	35.2	4.59938	0.086035	0.084961	-0.041895	94.369	-35.852	1499.917	-2.918	0.92188	-0.23877	-12.845	44.6505	3.4988	0.034277	-0.090136	-0.21865
2.676	-62.1828	-79.43	361.374	0.16699	0.19317	-0.09043	-9.9306	32.067	-19.7136	0.069043	0.096776	-0.037598	72.714	-37.403	1499.877	-2.9082	0.94336	-0.26514	-12.0077	24.078	15.3763	-0.0063478	-0.046387	-0.2167
2.678	-83.63	-104.527	391.4574	0.1543	0.19678	-0.10449	-1.4934	10.0958	7.768	0.057324	0.10693	-0.029785	25.6991	-51.783	1516.36	-2.8745	0.9585	-0.31787	-24.1733	-10.1944	22.0699	-0.028418	-0.0051758	-0.20986
2.68	-67.956	-114.85166	469.265	0.14023	0.19697	-0.12588	12.785	26.1186	9.2786	0.047949	0.11602	-0.026172	14.836	-49.985	1483.664	-2.8359	0.95898	-0.35474	-34.696	-25.143	26.4181	-0.031738	0.030273	-0.20996
2.682	-65.079	-87.5638	505.517	0.11494	0.20322	-0.15459	-14.022	-2.18285	-8.2023	0.03418	0.12842	-0.02002	35.7458	-45.14519	1518.64863	-2.7847	0.95166	-0.37842	-78.918	-24.089	36.96188	-0.041797	0.040918	-0.22226
2.684	-42.9112	-39.77342	507.9448	0.073926	0.22237	-0.1831	19.8308	11.68922	8.5504	0.025488	0.13662	-0.015625	36.2313	-21.5507	1536.4627	-2.7207	0.92969	-0.4043	-26.715	11.803	39.6079	-0.081445	0.054687	-0.2336
2.686	-17.415	-2.4787	523.445	0.023144	0.25205	-0.2167	35.766	37.077	-9.3855	0.014355	0.15596	-0.024317	48.5329	-25.9322	1554.403	-2.6851	0.91455	-0.41455	-21.4904	23.2521	34.926	-0.13379	0.096875	-0.25547
2.688	-30.047	8.354	562.774	-0.047363	0.29102	-0.24854	-2.839	6.3926	-6.2552	0.0014648	0.16181	-0.027832	13.025	-21.3014	1551.758	-2.6309	0.87012	-0.42969	-40.243	4.34009	17.3366	-0.1791	0.13955	-0.28476
2.69	-44.3219	17.279	628.4725	-0.13349	0.34053	-0.27051	33.4382	21.0213	15.3641	-0.012988	0.17207	-0.030664	41.687	-50.993	1564.543	-2.5964	0.82739	-0.43677	-25.924	-9.4923	-10.4082	-0.21045	0.18506	-0.31104
2.692	-23.3328	21.5456	670.071	-0.23086	0.39258	-0.29629	30.7644	9.84132	-2.031	-0.026367	0.18701	-0.033203	18.2381	-19.6859	1558.291	-2.5562	0.77979	-0.43994	-33.8622	-26.5599	-25.74884	-0.21846	0.22256	-0.33213
2.694	5.75	18.5666	698.708	-0.33711	0.44843	-0.31777	13.9294	-14.0691	33.307	-0.040137	0.19688	-0.04502	42.134	-7.854	1588.99	-2.5034	0.72217	-0.43896	-14.913	0.32934	30.9155	-0.2125	0.2582	-0.34893
2.696	4.364	16.888	744.121	-0.45361	0.5124	-0.32988	44.556	-6.497	57.8542	-0.05752	0.20957	-0.052637	9.51	38.966	1539.9689	-2.4741	0.69092	-0.43506	3.48	-13.69545	54.858	-0.1996	0.27969	-0.37471
2.698	-6.356	6.17100000000001	777.023	-0.5625	0.56934	-0.34082	19.2165	-57.65615	74.081	-0.079785	0.21738	-0.066309	-36.3657	30.357	1543.727	-2.4155	0.63916	-0.43115	46.4756	-45.995	83.433	-0.18125	0.28691	-0.39883
2.7	-12.756	-12.453	791.6151	-0.66817	0.63184	-0.35596	3.633	-55.026	133.1476	-0.10107	0.22695	-0.077442	-79.45	58.307	1512.891	-2.3689	0.60034	-0.41772	-3.30607	-83.559	61.038	-0.16602	0.27832	-0.42969
2.702	-12.423	-33.234	805.878	-0.76641	0.68867	-0.37871	17.117	-31.555	180.309	-0.12793	0.22949	-0.09082	-68.387	40.3493	1506.31	-2.3296	0.57275	-0.41357	-1.8883	-73.974	97.9012	-0.15128	0.267	-0.45332
2.704	27.3204	-68.765	815.199	-0.84688	0.74414	-0.39277	6.08086	-77.2671	253.213	-0.18691	0.23682	-0.11699	-52.9473	81.8828	1476.1989	-2.2734	0.5459	-0.3999	66.872	-27.7239	176.2608	-0.14072	0.25762	-0.47012
2.706	52.7023	-95.9408	851.504	-0.91514	0.80303	-0.40987	-42.4688	-51.468	358.329	-0.25674	0.26446	-0.13496	-29.2695	63.525	1493.322	-2.2456	0.5376	-0.39697	72.659	4.44	224.495	-0.15517	0.2502	-0.47715
2.708	55.8343	-109.98	888.951	-0.97217	0.86572	-0.43311	-73.44	-80.8809	472.024	-0.33916	0.30117	-0.14863	-73.09	88.233	1437.595	-2.189	0.521	-0.38135	112.967	2.107	272.36	-0.19013	0.24346	-0.4833
2.71	56.3455	-136.145	920.977	-1.0125	0.92598	-0.45078	-106.5076	-101.758	550.772	-0.43164	0.32793	-0.14658	-75.536	58.941	1400.319	-2.1453	0.51734	-0.36792	66.4599	-20.9494	315.902	-0.25781	0.24023	-0.49023
2.712	50.55	-161.058	940.203	-1.0503	0.98643	-0.4749	-106.84134	-43.755	574.089	-0.54541	0.36279	-0.13818	-69.62388	94.378379	1354.4805	-2.1035	0.51318	-0.3623	34.3951	-5.7	402.611	-0.34526	0.25147	-0.48456
2.714	44.324	-184.98	969.62	-1.0765	1.0485	-0.49873	-111.9749	-98.8899	594.33	-0.66924	0.39746	-0.12949	-11.592	84.91	1354.652	-2.0479	0.50146	-0.34668	43.9833	27.853	575.585	-0.44912	0.26721	-0.47117
2.716	5.025	-182.732	1015.3909	-1.0901	1.0975	-0.52246	-22.4452	-93.6237	666.541	-0.80058	0.43398	-0.1125	2.23	105.818	1352.6695	-2.0176	0.49609	-0.33057	64.6903	105.986	740.377	-0.56673	0.28831	-0.45243
2.718	34.6376	-168.729	1060.759	-1.105	1.1226	-0.54443	12.532	-74.362	707.034	-0.95332	0.4793	-0.083594	7.72348	76.062	1347.57165	-1.9629	0.48242	-0.3125	22.2494	123.465	862.512	-0.70813	0.3141	-0.43904
2.72	24.9213	-157.091	1079.201	-1.1399	1.1413	-0.5665	3.72	-76.2978	706.9668	-1.1424	0.52071	-0.050293	-5.005	114.264	1318.03371	-1.9307	0.47437	-0.28931	-7.1708	58.82	916.681	-0.85742	0.35156	-0.41797
2.722	36.266	-128.8014	1095.174	-1.1824	1.1597	-0.57344	45.262	-1.399	751.495	-1.3413	0.59814	-0.018555	0.5678	99.082	1297.6752	-1.896	0.46631	-0.271	-2.9837	3.427	975.552	-1.0818	0.38454	-0.35239
2.724	-3.928	-125.785	1115.0162	-1.225	1.1797	-0.58828	6.461	-5.691	745.2253	-1.5471	0.65508	0.01836	32.714	139.252	1260.617	-1.8491	0.45459	-0.24365	-22.754	-58.591	1061.973	-1.4034	0.41446	-0.27253
2.726	-8.089	-104.767	1127.275	-1.2598	1.1863	-0.58613	1.682	-24.796	778.6202	-1.7933	0.71064	0.041406	25.7877	109.526	1224.681	-1.8218	0.44824	-0.23145	54.774	-63.757	1107.726	-1.8015	0.49044	-0.23419
2.728	9.807	-83.927	1147.178	-1.2871	1.1855	-0.57568	53.7505	-18.8735	791.23889	-2.0678	0.79932	0.030468	45.58	133.495	1161.501	-1.7593	0.44189	-0.20557	56.128	-85.71	1069.174	-2.2294	0.63068	-0.21725
2.73	0.965	-74.118	1157.49	-1.3012	1.1802	-0.56318	64.3052	-52.732	791.10576	-2.2923	0.93232	-0.0045899	27.659	100.001	1145.534	-1.7028	0.43579	-0.19263	-1.6726	-144.166	989.004	-2.6206	0.82861	-0.19434
2.732	-1.668	-80.2672	1193.0042	-1.3184	1.1648	-0.54551	48.3374	-68.999	855.907	-2.4219	1.0508	-0.016113	28.0922	146.8961	1116.304	-1.6421	0.43604	-0.18018	-45.849	-215.693	959.148	-2.9166	1.0569	-0.164
2.734	6.546	-89.3606	1221.346	-1.3226	1.1457	-0.53418	23.53	-71.106	857.696	-2.4149	1.1253	0.0054689	23.3115	134.845	1087.669	-1.5586	0.43945	-0.15869	-76.6339	-253.472	987.269	-3.0607	1.2685	-0.1577
2.736	9.023	-88.7096	1243.2331	-1.314	1.1231	-0.52168	35.449	-101.043	877.158	-2.3289	1.1828	0.017676	39.3565	188.343	1034.203	-1.5176	0.44727	-0.14502	-41.236	-215.112	1050.8926	-3.0039	1.4104	-0.21338
2.738	-37.239	-86.61	1269.8027	-1.3062	1.1021	-0.50928	114.5983	-91.355	917.762	-2.182	1.1969	0.0012695	30.109	194.981	986.838	-1.4312	0.45264	-0.12158	-27.7666	-178.259	1099.531	-2.7677	1.4608	-0.32602
2.74	-56.1063	-97.771	1299.962	-1.3014	1.0736	-0.51328	145.666	-117.997	917.32	-2.03	1.1728	-0.045215	34.768	231.549	944.769	-1.3662	0.45556	-0.10474	-52.573	-202.811	1106.156	-2.418	1.4473	-0.45898
2.742	-20.395	-110.4812	1323.798	-1.3047	1.0485	-0.52344	105.729	-182.1312	946.917	-1.8921	1.105	-0.10303	-1.11211	236.564	935.609	-1.3022	0.45361	-0.090332	-142.559	-236.081	1094.489	-2.0436	1.3895	-0.56113
2.744	-9.707	-120.8403	1356.488	-1.327	1.034	-0.53633	126.751	-200.1	965.5226	-1.756	1.003	-0.13906	8.697	270.885	894.99	-1.2144	0.45313	-0.067871	-121.443	-231.705	1110.083	-1.7219	1.3114	-0.6429
2.746	2.625	-112.432	1362.3534	-1.3616	1.0256	-0.55107	88.356	-233.683	994.708	-1.6253	0.88955	-0.14756	-8.408	264.636	881.7453	-1.168	0.45117	-0.060059	-38.3881	-183.434	1186.6186	-1.5078	1.2104	-0.69705
2.748	-1.72	-113.301	1369.3882	-1.4077	1.0278	-0.57373	111.255	-239.983	1093.462	-1.5222	0.77705	-0.14326	-9.9154	264.041	851.97	-1.0796	0.44434	-0.039063	16.76	-131.98	1251.8896	-1.3894	1.075	-0.74449
2.75	10.1944	-94.734	1374.6427	-1.4678	1.0516	-0.58828	120.234	-225.247	1101.812	-1.457	0.675	-0.15156	-69.911	213.1023	806.424	-1.02	0.4375	-0.023193	-1.32	-115.719	1269.3331	-1.3359	0.91602	-0.77441
2.752	-25.003	-87.6754	1384.588	-1.5181	1.0863	-0.60371	59.692	-267.206	1128.7506	-1.4395	0.58789	-0.15869	-92.968	217.828	738.817	-0.96094	0.42773	-0.013672	3.7441	-171.36	1269.5853	-1.3345	0.74911	-0.77336
2.754	-25.7476	-69.834	1388.8593	-1.5697	1.1246	-0.62402	48.9279	-250.606	1178.9761	-1.4537	0.52481	-0.15996	-96.819	215.0126	693.572	-0.88574	0.40918	0.0073242	8.18	-215.164	1267.77	-1.377	0.59486	-0.76048
2.756	-0.295000000000002	-68.4013	1390.04	-1.6239	1.1585	-0.65166	-0.00749999999999984	-212.563	1179.142	-1.4987	0.48838	-0.14326	-75.096	235.832	653.873	-0.84912	0.39893	0.012695	15.2678	-285.977	1341.534	-1.4723	0.486	-0.72783
2.758	-1.0539	-63.37178	1376.306	-1.6855	1.1934	-0.69141	-9.7561	-159.2686	1239.395	-1.5663	0.47041	-0.11943	-93.107	229.8	626.81499	-0.7832	0.38135	0.030273	59.4606	-290.009	1399.206	-1.6376	0.45456	-0.6763
2.76	17.0695	-56.1464	1364.3771	-1.749	1.2365	-0.71699	23.5295	-89.048	1275.7516	-1.6648	0.4751	-0.086426	-94.403	207.905	589.8431	-0.73632	0.36792	0.037354	21.259	-276.793	1403.462	-1.853	0.50732	-0.63623
2.762	-38.341	-28.6921	1364.233	-1.8132	1.295	-0.75185	-1.667	-94.719	1268.9083	-1.7817	0.50439	-0.055176	-100.299	191.9104	545.541	-0.69141	0.35156	0.044922	-10.184	-263.67	1404.2384	-2.0955	0.6188	-0.62256
2.764	-24.048	-12.2318	1358.926	-1.8741	1.3591	-0.7792	2.268	-117.971	1292.712	-1.9153	0.55674	-0.02998	-76.467	198.399	511.019	-0.62891	0.33398	0.054688	-17.2425	-232.497	1402.812	-2.3175	0.75317	-0.63231
2.766	-22.9665	-5.1875	1344.449	-1.9277	1.4239	-0.80576	12.18	-84.561	1260.0919	-2.0565	0.61474	-0.01123	-64.483	215.359	500.003	-0.60254	0.32422	0.055176	-5.703	-217.039	1471.538	-2.4947	0.90679	-0.64998
2.768	9.003	-12.296	1350.959	-1.9766	1.4902	-0.83789	-13.734	-83.773	1285.53	-2.1831	0.68115	-0.0022461	-32.751	233.529	481.194	-0.55518	0.29736	0.062012	76.8538	-154.1205	1561.95	-2.6041	1.0603	-0.66838
2.77	3.025	-32.0693	1387.479	-2.0096	1.5545	-0.87794	-6.954	-63.369	1367.803	-2.3006	0.74707	-0.0057617	-65.968	230.075	448.513	-0.51977	0.28149	0.070069	83.7074	-113.397	1582.443	-2.6543	1.209	-0.70117
2.772	-8.5473	-32.68	1392.376	-2.0296	1.6157	-0.90635	-9.616	-49.687	1381.065	-2.3945	0.81445	-0.018555	-50.757	186.6394	388.0723	-0.49414	0.26025	0.072266	94.869	-71.641	1551.029	-2.6423	1.335	-0.7405
2.774	8.3253	-39.86	1395.574	-2.039	1.6767	-0.94072	-72.858	-98.8213	1407.9359	-2.4646	0.88272	-0.022657	-83.898	165.972	347.5473	-0.46387	0.24219	0.083496	78.534	-35.978	1514.593	-2.5825	1.4423	-0.78769
2.776	-13.525	-31.415	1372.7091	-2.0331	1.7302	-0.96592	-29.445	-116.006	1434.462	-2.5101	0.95049	-0.027148	-40.592	145.3068	335.7359	-0.45068	0.23145	0.085938	135.352	-9.64	1511.14	-2.4913	1.5104	-0.84303
2.778	-18.7655	-23.874	1367.706	-2.0234	1.7695	-0.98828	-31.541	-118.41	1435.52825	-2.5413	1.0068	-0.033399	-19.0651	157.251	292.448	-0.43164	0.20605	0.094238	139.262	-24.981	1529.789	-2.3781	1.5395	-0.90316
2.78	-37.3358	-25.2598	1361.4036	-2.0088	1.8045	-1.0021	-18.161	-124.549	1501.413	-2.5667	1.063	-0.052344	10.5964	141.238	280.7867	-0.42309	0.19116	0.097656	117.2763	-72.782	1540.391	-2.2632	1.5239	-0.95654
2.782	-9.0409	-32.009	1334.9803	-1.9898	1.8236	-1.0105	30.8987	-82.329	1508.685	-2.5991	1.1235	-0.088867	-14.3445	148.223	229.6921	-0.41846	0.17529	0.10791	52.2656	-89.796	1521.629	-2.1544	1.4787	-0.99932
2.784	-25.2661	-39.929	1338.4822	-1.969	1.8348	-1.0116	-14.5963	-110.222	1478.713	-2.6127	1.1748	-0.12217	7.90446	104.318	221.9614	-0.41602	0.15576	0.11377	-38.1104	-106.636	1522.2889	-2.0652	1.4215	-1.0198
2.786	-53.608	-39.009	1346.03887	-1.9477	1.8316	-1.0094	37.778	-129.183	1530.587	-2.6054	1.2177	-0.14629	25.0053	132.9529	186.888	-0.41552	0.14111	0.12696	0.0630000000000006	-57.152	1535.564	-2.0044	1.3544	-1.0182
2.788	-50.119	-35.374	1353.382	-1.9316	1.8242	-0.99609	52.622	-91.518	1508.858	-2.5792	1.2345	-0.15098	46.045	105.322	178.278	-0.41553	0.13135	0.13574	31.232	-37.594	1555.778	-1.9672	1.2924	-1.0106
2.79	-49.206	-7.852	1336.542	-1.9147	1.8091	-0.9789	67.619	-92.6067	1510.3133	-2.5409	1.2357	-0.15947	27.40074	147.738	147.927	-0.4126	0.11426	0.14795	55.0621	-20.8111	1556.801	-1.9453	1.2207	-1.001
2.792	-53.598	26.8225	1319.5971	-1.8998	1.7915	-0.9659	88.201	-24.029	1529.7545	-2.5098	1.2227	-0.15918	39.454	120.5883	153.649	-0.40869	0.10742	0.15625	27.6979	-61.459	1545.018	-1.9322	1.1712	-0.98088
2.794	-51.852	49.668	1301.8908	-1.8838	1.7684	-0.94441	42.704	10.995	1468.832	-2.4932	1.2064	-0.15254	-11.461	146.424	110.3952359	-0.39844	0.099609	0.17188	-9.573	-89.126	1536.646	-1.9207	1.132	-0.96312
2.796	-46.61	62.301	1269.5398	-1.8691	1.7435	-0.92694	43.651	-29.5844	1475.52143	-2.489	1.1911	-0.14541	-0.5354	102.975	111.0244	-0.38257	0.097168	0.17407	-8.228532	-67.845	1537.693	-1.9098	1.1047	-0.93343
2.798	-39.979	59.388	1256.264	-1.8428	1.7207	-0.91211	79.318	-2.5298	1458.6643	-2.4999	1.1818	-0.13291	-1.59200000000001	116.787	49.81	-0.36816	0.089844	0.18311	34.2109	-27.2331	1534.716	-1.8953	1.0891	-0.89728
2.8	-41.589	61.025	1266.29884	-1.818	1.6969	-0.89534	54.824	-13.8571	1437.338	-2.5172	1.1722	-0.12119	-1.33131	71.812	39.261	-0.32959	0.083984	0.19287	82.055	41.071	1517.362	-1.8784	1.0747	-0.86279
2.802	-48.13	37.541	1257.542	-1.7906	1.6791	-0.88471	85.427	-19.86158	1486.53856	-2.5347	1.1685	-0.10938	-21.97	102.787	11.987	-0.31641	0.083496	0.19189	14.304	39.8376	1456.0084	-1.8565	1.0614	-0.82881
2.804	-51.556	26.1026	1247.42	-1.7578	1.6541	-0.87222	44.575	38.6283	1454.029	-2.5578	1.1633	-0.094922	-17.2182	42.4305	20.55062	-0.27734	0.072266	0.19678	-17.344	40.511	1379.0684	-1.8195	1.0461	-0.79686
2.806	-12.3408	18.5393	1216.622	-1.7236	1.6301	-0.86298	-8.6643	4.014	1445.042	-2.5714	1.1638	-0.08584	-44.818	68.523	8.9332	-0.24463	0.061523	0.19507	-20.654	57.72	1350.918	-1.7788	1.0226	-0.76796
2.808	-32.4998	14.8517	1203.15	-1.689	1.606	-0.85693	29.92536	13.77685	1454.7451	-2.5761	1.1607	-0.070996	-25.2338	9.3423	35.988	-0.20947	0.050293	0.19434	-10.311	101.9339	1349.892	-1.7269	1.0002	-0.74375
2.81	-21.5472	27.6477	1187.827	-1.6496	1.5829	-0.8478	21.7242	9.9339	1419.5094	-2.5736	1.1541	-0.064453	-40.986	35.092	1.816	-0.16895	0.031738	0.18506	27.5852	132.984	1346.859	-1.6641	0.97363	-0.71484
2.812	-21.6097	29.4134	1160.0694	-1.6087	1.5565	-0.83502	39.5417	-42.5515	1453.5956	-2.5586	1.1445	-0.058105	-21.9903	-10.285	25.8819	-0.15918	0.022461	0.17285	23.6687	107.716	1304.2901	-1.6063	0.95528	-0.6877
2.814	-7.84	30.7755	1150.4464	-1.5729	1.5345	-0.83028	34.665	2.3125	1446.696	-2.5369	1.1279	-0.056738	-66.9567	44.5478	-8.1355	-0.1416	0.01416	0.17676	-2.9689	120.064	1219.505	-1.5448	0.94092	-0.65889
2.816	-22.9445	38.2744	1138.3442	-1.5442	1.5083	-0.82507	-65.283	-5.28638	1422.6216	-2.4987	1.1095	-0.055762	-41.478	36.103	19.9089	-0.11499	-0.012696	0.18335	6.729	118.126	1195.105	-1.4886	0.91592	-0.63545
2.818	8.6542	62.7758	1118.456	-1.5176	1.4863	-0.81641	-34.717	-15.7098	1446.9184	-2.453	1.0864	-0.056152	-45.047	64.424	28.58676	-0.08252	-0.046387	0.19287	44.1581	166.864	1209.24	-1.4298	0.90635	-0.59932
2.82	20.7227	74.648	1096.759	-1.4846	1.465	-0.80388	-45.682	33.3255	1395.218	-2.4059	1.0629	-0.053906	-23.2498	6.3107	36.55	-0.049316	-0.094238	0.20605	38.95	198.59	1220.299	-1.3711	0.8877	-0.57324
2.822	-8.496	92.061	1070.616	-1.4457	1.4474	-0.79185	-78.973	-0.408000000000001	1384.124	-2.3555	1.0391	-0.058105	-38.942	15.9402	8.5489	-0.040039	-0.1167	0.2124	52.5646	209.072	1198.522	-1.3163	0.86846	-0.54287
2.824	-12.221	91.903	1059.136	-1.4083	1.4138	-0.78239	-17.2146	44.857	1390.016	-2.3052	1.0163	-0.055664	-36.27	-30.0793	25.7123	-0.024414	-0.15576	0.22998	65.579	186.402	1147.2727	-1.2605	0.85401	-0.50869
2.826	-19.1445	95.062	1025.1346	-1.3704	1.3837	-0.76877	-81.488	95.76854	1334.896	-2.257	0.98594	-0.053711	-33.136	13.724	8.583	-0.019287	-0.17749	0.22657	24.0466	157.739	1131.8103	-1.2073	0.83994	-0.47822
2.828	9.7454	92.8884	1000.5165	-1.3413	1.354	-0.75049	-97.137	81.3922	1325.2042	-2.2074	0.9543	-0.056836	1.8971	8.63	35.3789	-0.015137	-0.19385	0.22754	61.195	167.452	1105.3413	-1.152	0.82422	-0.4456
2.83	-24.1054	89.9283	987.6614	-1.306	1.3216	-0.73085	-45.439	133.475	1304.2695	-2.1646	0.92675	-0.05664	9.038	39.052	32.6867	-0.0014648	-0.2168	0.22461	53.5205	172.7855	1093.3713	-1.0977	0.81348	-0.40869
2.832	-22.4217	85.5211	974.1432	-1.274	1.2877	-0.70836	-49.169	101.107	1274.909	-2.1226	0.89697	-0.055176	49.366	11.9198	12.0496	0.0029297	-0.22803	0.22705	35.583	198.0944	1037.8324	-1.0469	0.79804	-0.38242
2.834	-11.5358	104.9243	939.8146	-1.234	1.2477	-0.68195	4.09947	62.4121	1275.208	-2.0812	0.86846	-0.053223	18.681	11.09945	0.5068	0.017578	-0.24365	0.21191	-23.0895	172.397	991.455	-0.99277	0.78398	-0.35293
2.836	-27.4636	107.406	906.0114	-1.1929	1.2073	-0.65828	5.51	102.113	1234.228	-2.0402	0.84609	-0.046875	28.634	-13.332	0.8348	0.042236	-0.25488	0.20581	-33.166	188.744	957.975	-0.93496	0.77304	-0.31699
2.838	-31.0853	101.265	883.4492	-1.145	1.1626	-0.63525	-30.0263	96.3304	1205.352	-1.9993	0.82305	-0.048828	28.067	9.4233	10.6039	0.06543	-0.2666	0.19189	-17.5039	210.0956	903.059	-0.88398	0.76484	-0.28887
2.84	-25.6609	84.6238	878.5975	-1.1084	1.1269	-0.61663	31.9825	150.508	1236.136	-1.9602	0.80811	-0.047363	65.5	9.318	26.185	0.09668	-0.27148	0.16553	19.68563	246.121	864.798	-0.82959	0.7583	-0.26416
2.842	0.190999999999999	86.5364	857.258	-1.0763	1.0892	-0.60125	5.0374	166.765	1188.499	-1.916	0.79102	-0.050781	53.0726	10.6564	17.8363	0.11963	-0.27051	0.14941	20.9215	250.31	818.6021	-0.78428	0.74678	-0.23095
2.844	-20.9919	91.2463	856.318	-1.0431	1.0552	-0.5804	24.07683	94.65893	1177.984	-1.867	0.77636	-0.053321	71.489	-12.141	9.4093	0.19238	-0.26611	0.11572	-51.827	219.613	759.3466	-0.73594	0.73086	-0.20762
2.846	-13.5976	91.8329	839.893	-1.0005	1.0179	-0.5639	62.923	111.6642	1157.181	-1.8147	0.75909	-0.057227	29.219	-8.0063	5.1566	0.24927	-0.26318	0.091798	-59.291	232.32	711.55447	-0.69023	0.71563	-0.18301
2.848	-19.879	86.6972	813.9609	-0.95947	0.97119	-0.5376	-4.2793	83.35	1119.3818	-1.7616	0.74814	-0.059179	19.184	-8.7001	-19.1298	0.30566	-0.26367	0.064941	-17.7476	231.8232	673.5174	-0.64365	0.69971	-0.15557
2.85	-19.307	99.6729	789.511	-0.91575	0.92407	-0.51745	48.541	98.343	1148.558	-1.7121	0.7293	-0.061133	17.15	10.9702	2.123	0.36279	-0.26123	0.015625	-7.6568	265.28	667.497	-0.604	0.67432	-0.1333
2.852	-24.262	104.0065	756.4927	-0.86971	0.87586	-0.49407	85.048	158.5088	1093.1851	-1.6592	0.70703	-0.064453	37.7146	13.841395	-8.27	0.38916	-0.25391	-0.0073242	-54.492	249.482	619.747	-0.56612	0.64991	-0.1165
2.854	-31.2323	112.3867	738.6851	-0.82582	0.82417	-0.47083	20.745	125.58449	1054.838	-1.6023	0.68711	-0.067187	3.224	2.0875	4.753	0.42041	-0.23145	-0.050293	-94.665	232.7011	560.942	-0.53125	0.61631	-0.092285
2.856	9.8441	112.339	715.775	-0.78249	0.77934	-0.45367	79.37	142.9063	1042.6436	-1.5433	0.66455	-0.070411	16.9343	-0.0409999999999999	-19.1146	0.43945	-0.21338	-0.080078	-101.54	207.848	494.557	-0.5	0.58154	-0.072364
2.858	0.286	109.005	676.282	-0.74121	0.73975	-0.43311	54.6146	147.6975	983.9472	-1.4812	0.63994	-0.073926	-4.274	-15.9824	-12.33715	0.46045	-0.19092	-0.10449	-91.092	182.295	447.6486	-0.47099	0.5542	-0.056445
2.86	3.956	107.0401	648.3869	-0.70593	0.70518	-0.41852	30.9147	141.758	981.3401	-1.421	0.6167	-0.076856	-30.2215	14.0838	-19.9732	0.48486	-0.16895	-0.13379	-52.96	182.094	424.588	-0.44629	0.51953	-0.036133
2.862	-8.317	105.3902	631.3551	-0.67824	0.6772	-0.40845	85.927	213.633	970.791	-1.3594	0.59766	-0.078613	-19.499	23.7584	3.9134	0.49658	-0.15479	-0.14404	-70.247	157.87	386.187	-0.42802	0.48994	-0.02627
2.864	28.67	117.779	599.6643	-0.65597	0.65112	-0.39478	27.6928	182.102	916.1886	-1.2985	0.57275	-0.082031	-24.6908	58.267	-16.6991	0.50146	-0.13525	-0.16504	-50.725	146.333	329.498	-0.40859	0.45342	-0.014453
2.866	24.854	123.584	565.632	-0.63259	0.6276	-0.38271	21.5887	147.0682	904.0953	-1.237	0.54307	-0.080762	-36.4971	39.237	13.8264	0.50708	-0.11694	-0.16919	-64.7468	149.181	286.049	-0.39883	0.42256	0.0035156
2.868	20.639	119.4162	546.048	-0.60889	0.60791	-0.37402	-2.84	170.0992	831.233	-1.1792	0.51338	-0.08545	-47.562	45.3268	-19.0934	0.50195	-0.099121	-0.1748	-45.5833	157.479	284.27	-0.3916	0.3918	0.00048832
2.87	18.867	120.493	562.905	-0.59044	0.57922	-0.35929	-30.1118	135.9961	801.542	-1.1212	0.48711	-0.083398	-46.2261	19.499	7.1566	0.48633	-0.070313	-0.17334	-7.0101	189.206	285.8279	-0.38574	0.36621	0.0043945
2.872	29.3683	119.778	533.031	-0.57287	0.55627	-0.34787	13.216	190.193	805.313	-1.0718	0.46338	-0.087891	-58.8254	41.47279	9.5968	0.47412	-0.056641	-0.17188	-1.581	195.957	260.4106	-0.38613	0.34082	0.01084
2.874	38.7	123.96	499.176	-0.55217	0.53166	-0.32873	-13.4031	218.865	763.4523	-1.0255	0.44033	-0.088769	-41.575	13.6653	7.8202	0.44775	-0.034668	-0.16699	2.1735	198.264	205.7914	-0.3874	0.32627	0.014453
2.876	-3.328	107.868	468.9694	-0.52764	0.49982	-0.31485	-29.7559	177.1048	744.49	-0.97275	0.41475	-0.079785	-35.7141	39.1893	-5.7718	0.41211	-0.016113	-0.16431	-16.1358	175.461	159.1517	-0.38975	0.31689	0.022266
2.878	13.482	93.4671	454.4614	-0.50732	0.47705	-0.2998	-8.0343	200.212	713.62	-0.91767	0.38545	-0.072754	-31.4981	-4.1802	26.454	0.37354	0	-0.16016	-37.088	168.755	135.628	-0.39678	0.31592	0.020508
2.88	26.985	96.6816	434.348	-0.48935	0.454	-0.28564	-30.50437	149.5011	670.8666	-0.86572	0.3541	-0.069532	9.66	31.5523	22.3061	0.3374	0.022949	-0.15039	-13.5792	133.40278	137.597	-0.40771	0.31689	0.026367
2.882	34.3906	96.7842	418.69384	-0.46503	0.43046	-0.27031	-6.282	120.1361	680.46	-0.81641	0.32715	-0.064453	11.0778	2.8044	48.921	0.31445	0.030273	-0.14307	3.5106	134.214	125.513	-0.40537	0.31377	0.0417
2.884	14.258	81.9294	406.0459	-0.4373	0.40585	-0.2625	-0.591000000000001	164.781	624.9509	-0.77373	0.30576	-0.071484	8.222	36.27258	15.2288	0.27539	0.043945	-0.13086	-19.0392	99.797	104.1082	-0.40059	0.30312	0.055664
2.886	2.46	71.7893	393.8717	-0.41161	0.37939	-0.25156	-16.846	134.3662	593.28339	-0.73243	0.27823	-0.069727	12.7289	4.42571	17.1099	0.23242	0.056152	-0.12574	8.4219	93.344	70.186	-0.39434	0.29961	0.068945
2.888	21.641	77.9884	373.1493	-0.38037	0.34814	-0.2417	22.2284	164.13	571.025	-0.67969	0.26025	-0.067774	33.919	34.264	17.0707	0.18555	0.074219	-0.12207	30.936	83.4812	49.595	-0.38525	0.30147	0.075195
2.89	0.172000000000004	95.642	343.5429	-0.35469	0.317	-0.2251	-7.8218	156.3552	521.254	-0.62657	0.23652	-0.06582	33.781	-10.727	32.7051	0.13135	0.098633	-0.11035	22.2813	57.376	60.759	-0.37695	0.2998	0.078613
2.892	-11.026	92.47	321.4731	-0.32852	0.29082	-0.21455	10.819	105.519	503.0362	-0.57617	0.2085	-0.060547	60.098	22.489	22.1146	0.10791	0.10938	-0.10693	29.4735	39.8236	57.9985	-0.36133	0.30293	0.077246
2.894	-3.425	85.699	325.462	-0.31562	0.2627	-0.20127	60.8928	155.736	467.63435	-0.53984	0.18437	-0.060645	50.962	-9.994	41.714	0.067871	0.13867	-0.094238	27.43447	-5.516	56.12	-0.34912	0.29815	0.074414
2.896	19.097	91.133	290.187	-0.30518	0.23887	-0.18555	18.03	142.3432	426.3567	-0.4999	0.17129	-0.066699	22.452	9.20978	-4.5169	0.038574	0.15991	-0.084961	-3.49773	-11.787	40.254	-0.32959	0.29151	0.070117
2.898	-7.011	85.511	275.1138	-0.29248	0.21582	-0.17627	57.638	138.645	411.553	-0.4542	0.15527	-0.076074	9.9817	-12.24	25.0104	0.013184	0.18408	-0.076172	-21.4046	-14.9298	39.954	-0.30908	0.28134	0.070507
2.9	-23.146	86.239	267.4428	-0.28642	0.19258	-0.16592	58.429	167.6133	366.2374	-0.4042	0.1333	-0.071973	30.555	28.8278	-5.5181	-0.02832	0.20117	-0.062012	14.5009	2.4806	34.261	-0.29248	0.26807	0.070801
2.902	-2.49	88.022	255.6729	-0.27959	0.17139	-0.15547	42.844899	107.696	357.3272	-0.35596	0.10352	-0.0625	50.616	-4.394	11.8164	-0.046875	0.21777	-0.050293	-4.709	15.33338	47.533	-0.27939	0.24658	0.071094
2.904	-3.816	99.134	244.5413	-0.26787	0.15263	-0.14688	98.706	116.162	334.336	-0.31299	0.081738	-0.060742	53.401	21.6688	5.1091	-0.087891	0.24316	-0.030762	-33.5396	6.3005	15.545	-0.26368	0.2249	0.075391
2.906	-5.079	91.255	217.401	-0.25635	0.13086	-0.14141	65.825	130.8971	299.009	-0.27325	0.051855	-0.056543	24.5425	-18.311	3.059	-0.11621	0.25952	-0.013672	-28.0791	-1.986	-3.83	-0.24804	0.20225	0.080469
2.908	-3.979	80.323	212.1688	-0.24609	0.11328	-0.13477	51.99	125.819	288.306	-0.24394	0.034668	-0.059277	-14.894	1.8023	-23.793	-0.14893	0.27539	0.00048828	-50.421	-24.494	-27.1382	-0.23916	0.17637	0.087012
2.91	18.923	76.383	204.7946	-0.22237	0.091504	-0.12744	79.258	177.088	250.6435	-0.21914	0.011914	-0.056445	1.8475	-13.5131	-5.661	-0.18799	0.2915	0.028809	-36.7256	-0.4979	-13.4906	-0.23291	0.1499	0.092773
2.912	10.272	69.675	184.4839	-0.2	0.074805	-0.125	31.3924	131.3005	238.1378	-0.19092	-0.0053711	-0.057129	-6.545	9.8711	-2.474	-0.20752	0.29639	0.040039	15.604	-6.0197	2.4568	-0.22168	0.12617	0.10566
2.914	12.368	63.094	176.9945	-0.175	0.063867	-0.125	53.27	99.3157	234.009	-0.16543	-0.029297	-0.055274	0.119	-4.7512	21.14892	-0.24756	0.30615	0.066895	-16.385	-9.2427	-11.5389	-0.21504	0.10391	0.1251
2.916	5.73	49.4703	171.361	-0.14658	0.049707	-0.12246	50.102	104.2867	203.16	-0.1413	-0.051953	-0.050782	-18.569	14.9253	1.0718	-0.27026	0.31104	0.081787	-36.366	-16.8398	-36.8793	-0.20606	0.0875	0.1415
2.918	21.884	59.511	161.8069	-0.12109	0.039551	-0.12891	17.9793	59.749	207.565	-0.11982	-0.073047	-0.047656	-40.787	7.059	-21.1229	-0.29004	0.31104	0.094727	4.71074	13.7517	-29.513	-0.19414	0.069922	0.15577
2.92	20.0424	72.64	158.0594	-0.10254	0.035449	-0.12343	31.3232	98.693499	195.4909	-0.096384	-0.092383	-0.036133	-68.984	27.672	-13.033	-0.3125	0.31494	0.11133	-6.08826	39.028	-12.9091	-0.17773	0.057129	0.18066
2.922	-0.714000000000002	60.7798	154.1374	-0.082129	0.032519	-0.11787	-8.749	107.7392	176.819	-0.072754	-0.1167	-0.03125	-44.268	10.50827	-2.074	-0.31689	0.31055	0.11182	4.206	51.324	8.386	-0.16142	0.044433	0.20059
2.924	24.264	44.1037	161.712	-0.06416	0.029395	-0.11591	-15.326	79.2788	177.50677	-0.069922	-0.13252	-0.032422	-50.375	6.81	26.737	-0.32227	0.30859	0.10596	36.8094	37.0625	16.21	-0.13448	0.030762	0.22324
2.926	30.383	52.7326	130.5628	-0.045996	0.028515	-0.11054	8.603	112.278	149.5698	-0.06377	-0.13877	-0.03164	-5.812	-22.193	37.335	-0.31518	0.30151	0.104	-8.446	-0.0480000000000018	1.2613	-0.10049	0.018262	0.23886
2.928	17.795	58.29	103.941	-0.034668	0.024414	-0.10303	-20.4886	74.059	119.34	-0.061035	-0.14697	-0.032422	-15.875	-35.182	49.5632	-0.30615	0.29541	0.087402	4.2654	-6.2675	-16.9172	-0.061426	0.00087894	0.25225
2.93	7.48	57.598	106.122	-0.020215	0.021289	-0.096777	-34.6449	61.501	119.8301	-0.055762	-0.15527	-0.033399	-30.7979	-36.542	63.2383	-0.28662	0.28027	0.062012	27.0139	-7.3286	-11.3273	-0.0068359	-0.019531	0.25684
2.932	28.725	54.04	97.129	-0.0052735	0.016406	-0.091114	-26.3447	85.601	95.9829	-0.047852	-0.16113	-0.036133	-35.7968	-38.933	129.993	-0.26318	0.2749	0.043457	31.88703	19.6515	-3.51	0.07207	-0.056348	0.26943
2.934	24.427	51.043	81.9695	0.0064453	0.011719	-0.089942	-50.991	52.724	111.6763	-0.038574	-0.16875	-0.031836	-22.2494	-45.455	144.164	-0.24951	0.26611	0.023926	21.331	24.8986	16.097	0.15205	-0.099122	0.26318
2.936	4.463	53.377	73.1346	0.021875	0.0057617	-0.0875	0.425000000000001	68.079	110.2804	-0.030859	-0.17852	-0.02461	-11.318	-56.54	212.6655	-0.23877	0.25049	-0.00048828	45.3763	10.95823	26.6813	0.23252	-0.14795	0.2413
2.938	6.843	39.2016	84.9718	0.036621	-0.0043945	-0.085449	-25.4885	59.089	64.8243	-0.021094	-0.17657	-0.02539	4.22113	-62.011	238.0171	-0.24365	0.23828	-0.0063477	23.1492	15.2638	12.6189	0.29082	-0.18506	0.2
2.94	-0.381	37.835	96.7784	0.048926	-0.017969	-0.087988	-25.1357	41.6841	68.5809	-0.020117	-0.17881	-0.02373	-3.9343	-38.4384	341.299	-0.27148	0.21387	-0.021484	36.3735	-2.829	7.13495	0.34766	-0.20898	0.15918
2.942	27.309	50.5024	84.366	0.062207	-0.02793	-0.08291	-1.15	79.228	47.2862	-0.014648	-0.17578	-0.018555	-26.2997	9.9621	458.793	-0.3108	0.18823	-0.035889	51.696	24.54	26.58111	0.39697	-0.22959	0.11514
2.944	-13.328	55.823	60.6477	0.07627	-0.033399	-0.077441	-35.34	68.328	53.6952	-0.010156	-0.17578	-0.015722	-39.156	25.9752	578.619	-0.37109	0.16504	-0.049805	24.1018	18.8485	26.8508	0.44326	-0.24756	0.081543
2.946	-30.5627	50.444	50.7353	0.0833	-0.040527	-0.069434	6.425	52.923	65.4757	-0.012305	-0.17549	-0.013379	-48.718	33.43567	642.786	-0.46729	0.14063	-0.059082	17.0182	21.4934	3.9726	0.49483	-0.25811	0.052636
2.948	-9.284	31.396	48.8163	0.090332	-0.046387	-0.066895	27.2604	53.238	37.5504	-0.016602	-0.16846	-0.0083008	-64.2481	2.85665	740.542	-0.5249	0.12842	-0.066406	-1.5958	1.7426	6.922	0.53887	-0.2709	0.027832
2.95	13.667	28.316	45.98	0.088574	-0.050196	-0.060937	10.898	-8.7481	23.42529	-0.020508	-0.16152	0.00039062	-56.8643	-8.2428	788.895	-0.66357	0.10645	-0.067383	3.274	3.06185	17.054	0.56836	-0.28418	0.0078125
2.952	-26.8995	22.6658	52.818	0.08584	-0.058106	-0.052637	35.1016	1.4031	33.376	-0.02832	-0.15381	0.0073242	-24.9021	-20.3945	903.449	-0.79688	0.090332	-0.048096	-6.078	13.0244	20.275	0.58457	-0.29062	-0.0069336
2.954	-19.671	31.0228	47.894	0.081933	-0.058496	-0.044043	27.476	20.5935	17.1216	-0.036035	-0.14492	0.018262	16.047	12.683	921.12	-0.95361	0.077637	-0.02002	8.583	7.1748	45.2005	0.59932	-0.28135	-0.017188
2.956	21.036	35.1512	43.5251	0.07793	-0.062988	-0.033203	29.2808	4.6474	36.03374	-0.047559	-0.13633	0.03164	27.643	-10.623	901.17	-1.1968	0.081055	0.023438	-24.6466	16.3248	24.8982	0.62041	-0.26182	-0.023437
2.958	-8.206	38.9962	49.751	0.072754	-0.060059	-0.026855	73.528	41.693	15.338	-0.056933	-0.12422	0.041797	53.519	-55.758	837.448	-1.3354	0.091797	0.043457	-58.964	-6.8666	7.16	0.63086	-0.24258	-0.030859
2.96	-28.3985	41.723	40.8806	0.061621	-0.063281	-0.014746	42.8418	-0.7574	12.5647	-0.070996	-0.11367	0.050684	52.884	-135.077	834.24721	-1.605	0.11914	0.10498	-7.342	-27.549	-1.662	0.63135	-0.22314	-0.044922
2.962	-19.5427	23.47577	43.91212	0.044922	-0.064648	-0.0039062	28.5606	-19.8052	21.3231	-0.085938	-0.10742	0.061035	78.191	-137.858	854.985	-1.8162	0.15601	0.15284	-19.2063	-37.077	-16.3039	0.61485	-0.18769	-0.052735
2.964	-0.344999999999999	21.9608	30.1199	0.025781	-0.065039	0.0058594	57.712	22.5735	-16.3329	-0.093848	-0.098244	0.070118	95.204	-139.289	943.53364	-2.0293	0.19043	0.18994	-3.753	-21.292	-17.6632	0.58867	-0.15302	-0.064648
2.966	3.913	27.811	13.3388	0.0093751	-0.068262	0.019141	23.8552	-13.51266	-5.22457	-0.10694	-0.087402	0.089453	104.426	-139.53	950.6392	-2.2949	0.25293	0.21973	-8.861	-11.4797	6.6222	0.55742	-0.11202	-0.072461
2.968	-8.103	27.056	30.065	-0.0097656	-0.076172	0.030273	34.8661	6.0763	13.1659	-0.11474	-0.080762	0.098437	22.338	-199.15	971.8	-2.3945	0.29492	0.2251	-30.7468	-3.392	5.69382	0.52304	-0.074219	-0.069238
2.97	2.825	21.4874	20.6638	-0.030664	-0.087598	0.046289	12.7625	-1.50757	-10.7867	-0.12265	-0.075879	0.10859	-6.742	-245.1485	938.31481	-2.5073	0.39893	0.23096	-39.535	18.613	-6.3623	0.48047	-0.039551	-0.067871
2.972	9.486	22.907	14.2683	-0.053223	-0.099511	0.05	6.2439	-39.32	17.9821	-0.12451	-0.073242	0.12012	1.022	-265.5608	969.842	-2.4968	0.49658	0.22242	15.043	29.236	-4.00513	0.42969	-0.010449	-0.079102
2.974	26.8265	36.41	17.8112	-0.07041	-0.11005	0.058203	23.6114	16.1867	-15.31296	-0.12461	-0.072656	0.12842	66.159	-214.788	1034.107	-2.4336	0.58203	0.20703	22.4357	45.534	9.502	0.37754	0.015039	-0.080078
2.976	5.291	26.9423	18.5295	-0.091797	-0.11963	0.060352	-32.1104	10.0027	-16.9297	-0.12138	-0.073242	0.13496	63.664	-171.481	1098.9404	-2.3101	0.67041	0.15625	-10.2369	4.7417	12.874	0.32402	0.047461	-0.084766
2.978	19.4315	16.3177	35.3234	-0.11084	-0.12939	0.064453	1.913	12.5165	10.2089	-0.11474	-0.074414	0.13965	78.926	-166.163	1079.862	-2.2539	0.69727	0.12109	-5.9233	6.7437	-1.3304	0.26973	0.078418	-0.084668
2.98	21.497	19.1257	25.1183	-0.12588	-0.13437	0.055371	-21.4869	33.302	-21.6756	-0.10459	-0.076074	0.14267	58.1421	-213.564	1098.0187	-2.1499	0.73682	0.061035	-26.6271	-14.5726	-20.8017	0.21875	0.11621	-0.085449
2.982	14.899	21.6291	6.4457	-0.14472	-0.13515	0.046973	-45.008	-3.3967	-9.5216	-0.09668	-0.086914	0.146	65.4258	-253.947	1123.205	-2.0906	0.74487	0.030762	36.19249	12.245	-22.5222	0.18086	0.15596	-0.078809
2.984	11.337	11.83926	12.7254	-0.15996	-0.13399	0.035254	-11.53091	-8.4542	-7.84	-0.083496	-0.089649	0.14795	72.8941	-265.983	1219.122	-2.0469	0.74121	0.01416	54.504	32.8143	-3.781	0.14873	0.19883	-0.064844
2.986	4.576	11.0637	15.0486	-0.17442	-0.12676	0.027148	-28.5786	-12.0136	0.706	-0.073339	-0.097755	0.14365	93.129	-230.638	1285.349	-2.0488	0.7041	0.0053711	45.027	28.2236	5.5	0.13506	0.23828	-0.046875
2.988	24.742	11.9115	2.3334	-0.1875	-0.1167	0.010742	-36.778	-18.90431	19.8877	-0.06123	-0.10322	0.14014	31.666	-221.7969	1321.152	-2.0679	0.68018	0.010742	24.1389	37.616	-10.3256	0.11123	0.26973	-0.023535
2.99	7.136	12.8875	2.99078	-0.1956	-0.099608	0.01084	-25.9325	23.6601	-4.42958	-0.045507	-0.1126	0.13545	1.448	-217.0734	1339.931	-2.1519	0.63916	0.017578	17.3688	23.7468	6.5679	0.064941	0.29346	-0.0014648
2.992	12.874	17.4042	5.3331	-0.20313	-0.073926	0.00097656	-68.782	14.432	-23.05795	-0.036621	-0.11865	0.13086	-15.81591	-224.881	1373.1482	-2.2488	0.61181	0.039795	45.014	20.7769	24.961	0.0007812	0.32734	0.02041
2.994	-0.704999999999998	19.0846	31.743	-0.20586	-0.05127	-0.00097653	-12.7355	7.67674	-0.6675	-0.029884	-0.1209	0.12568	23.191	-174.14	1417.097	-2.3569	0.59521	0.057129	30.6987	11.0515	39.5596	-0.064355	0.36846	0.035059
2.996	15.154	16.4226	20.2631	-0.20429	-0.024219	-0.012695	19.6984	14.2016	-13.0147	-0.021387	-0.12988	0.12207	39.001	-148.4319	1488.6094	-2.5059	0.58887	0.076172	60.604	-1.224	34.7922	-0.11553	0.4001	0.042871
2.998	-10.478	12.0828	9.193	-0.20117	0.0068359	-0.021973	-29.7401	-6.15698	-14.29625	-0.016702	-0.12832	0.12246	40.048	-108.087	1500.1976	-2.5723	0.59668	0.088379	10.3229	-9.9432	15.4882	-0.14697	0.41826	0.060449
3	-26.176	25.5912	4.244	-0.19385	0.032226	-0.031055	22.7079	17.4648	0.39101	-0.016505	-0.13037	0.11524	-0.256	-106.972	1478.649	-2.7124	0.61768	0.099609	-7.811	-14.84966	14.486	-0.17188	0.42139	0.076172
3.002	6.284	19.6038	8.101	-0.18897	0.059571	-0.036817	17.4854	22.301	-22.0033	-0.016113	-0.13184	0.11182	26.6351	-73.155	1481.536	-2.813	0.64648	0.087647	-4.9627	8.8629	22.5992	-0.18223	0.4209	0.087207
3.004	-11.28	22.2523	10.7507	-0.17607	0.07832	-0.037207	6.798	7.4671	11.9126	-0.018066	-0.13076	0.10722	62.5778	-81.247	1512.254	-2.9238	0.69141	0.076172	7.383	16.53519	25.265	-0.18926	0.41572	0.089941
3.006	-4.954	13.51771	6.2066	-0.16582	0.096386	-0.038184	33.4854	21.8045	7.4268	-0.021786	-0.12324	0.10645	61.822	-64.436	1586.602	-3.0464	0.76709	0.059082	11.8051	26.1696	24.92323	-0.18926	0.39697	0.095801
3.008	-17.608	11.8429	7.09828	-0.15332	0.10645	-0.035645	18.4837	16.9728	-18.5647	-0.02803	-0.12168	0.11232	44.957	-101.045	1569.3941	-3.0977	0.8125	0.047363	1.363	-15.8028	5.8258	-0.17822	0.37861	0.098048
3.01	4.289	10.72868	16.0055	-0.14121	0.11328	-0.035644	39.531	24.783	10.1258	-0.033502	-0.1119	0.10567	12.688	-84.7473	1570.9121	-3.187	0.89697	0.015137	-9.2203	-11.1073	1.264	-0.16016	0.35938	0.097168
3.012	-14.197	8.635503	27.1531	-0.12686	0.11328	-0.02998	61.991	38.2332	-6.55583	-0.041504	-0.10547	0.11035	-11.184	-88.55	1567.9116	-3.2214	0.95435	-0.0085448	-49.065	-19.9325	-14.048	-0.13301	0.34004	0.097363
3.014	-22.078	11.5825	29.1987	-0.10889	0.10391	-0.024512	17.8213	13.7061	8.9075	-0.04794	-0.1006	0.11171	-26.2131	-52.265	1590.5029	-3.2378	1.0122	-0.033203	3.434	-1.8774	8.18101	-0.10078	0.31201	0.085644
3.016	-0.424999999999997	17.7082	15.5182	-0.094141	0.09248	-0.023633	23.4161	-1.3807	9.9459	-0.055937	-0.090846	0.11599	2.677	-59.3038	1608.91	-3.228	1.0708	-0.047363	-18.2494	22.6846	5.454	-0.066016	0.27881	0.064941
3.018	-1.721	12.6165	-8.1401	-0.076172	0.077637	-0.020508	47.5163	0.9303	-15.3677	-0.059469	-0.083815	0.12226	18.55	-58.8711	1629.781	-3.2227	1.0996	-0.056152	-46.9397	-5.0278	37.0305	-0.037109	0.24111	0.034864
3.02	3.086	25.8788	9.1612	-0.063184	0.060156	-0.017773	37.0819	-11.355	-6.83935	-0.062886	-0.076004	0.1217	-11.773	-103.286	1608.642	-3.1875	1.1348	-0.061035	-25.1117	-15.5304	55.4709	-0.010254	0.20703	-0.0092773
3.022	-2.514	17.3568	22.8199	-0.046485	0.043848	-0.016895	42.151	15.699	3.132	-0.057617	-0.067871	0.12305	-5.894	-90.863	1614.248	-3.1687	1.1565	-0.054687	-31.5812	-60.887	63.199	0.0064453	0.18184	-0.052149
3.024	12.057	13.1616	13.1371	-0.033203	0.027832	-0.019239	12.8963	15.2435	2.7851	-0.052604	-0.060583	0.12343	18.6525	-67.689	1590.099	-3.1465	1.1699	-0.04248	-18.0553	-45.2527	95.7012	0.015234	0.1625	-0.10761
3.026	7.534	11.1279	-6.56059	-0.018555	0.012988	-0.018652	19.90075	10.5269	29.0197	-0.042553	-0.05551	0.12376	50.11382	-17.1655	1611.7481	-3.1304	1.1782	-0.03418	-29.9	-43.7942	149.315	0.0058594	0.15547	-0.15684
3.028	13.714	13.94082	16.7452	0.0014648	0.00097656	-0.01709	3.9185	39.24	17.4317	-0.031158	-0.05121	0.12271	40.362	0.231800000000001	1589.7349	-3.1211	1.1797	-0.027832	-17.2886	-44.1953	255.557	-0.028223	0.15957	-0.2127
3.03	14.724	11.6397	34.43	0.021387	-0.0048828	-0.025976	-20.0111	11.1428	7.6935	-0.013488	-0.049475	0.11558	12.032	14.841	1545.421	-3.0957	1.1699	-0.019043	-29.3718	-64.831	360.699	-0.091309	0.16943	-0.271
3.032	11.438	20.0489	21.2016	0.046973	-0.01084	-0.031933	9.345	-3.00419	22.769	0.0039063	-0.051758	0.10254	12.083	10.904	1505.643	-3.0664	1.1582	-0.0097654	-42.0814	-94.481	518.772	-0.175	0.18027	-0.32881
3.034	26.927	21.928	-1.149	0.07666	-0.018261	-0.041308	-46.9528	14.11189	-6.0422	0.021758	-0.048318	0.093391	20.839	43.7482	1506.2144	-3.0254	1.1348	-0.00048828	-53.8161	-71.099	672.694	-0.2747	0.19502	-0.38877
3.036	-2.524	22.9345	4.719	0.11065	-0.019824	-0.051465	-35.1437	-7.4646	-2.3778	0.039239	-0.056548	0.082692	25.032	52.019	1508.447	-2.9453	1.084	0.01123	-75.044	-59.072	835.673	-0.38994	0.22198	-0.45088
3.038	9.959	8.9497	32.806	0.1499	-0.021973	-0.060547	1.6897	22.7009	7.918	0.057575	-0.061806	0.075018	15.32	66.6685	1520.4204	-2.896	1.0532	0.019043	-91.3244	-17.601	940.4286	-0.50332	0.25996	-0.5041
3.04	1.024	-4.151	37.549	0.18799	-0.021875	-0.079882	-56.405	5.951	8.7614	0.075459	-0.068951	0.063514	11.868	63.9029	1482.988	-2.7891	0.9873	0.027344	-95.7922	-36.672	1010.533	-0.61768	0.31396	-0.53857
3.042	24.663	-16.516	30.7413	0.23105	-0.024219	-0.092578	-16.4862	-25.1805	20.1919	0.088867	-0.07373	0.045898	-5.704	57.122	1455.9176	-2.7065	0.93994	0.037842	-10.8699	-56.594	1082.441	-0.74697	0.40674	-0.5544
3.044	-4.008	-29.081	49.1868	0.26856	-0.021094	-0.11758	-27.7492	6.1126	-5.4008	0.1064	-0.085252	0.031275	5.271	72.636	1418.633	-2.6265	0.89502	0.041992	51.511	-120.546	1132.97	-0.89258	0.53008	-0.52715
3.046	-5.89	-15	70.4829	0.30303	-0.020801	-0.13613	-41.8626	0.2594	-8.5048	0.11865	-0.094291	0.011151	22.648	101.044	1403.153	-2.5112	0.83838	0.045898	109.843	-133.88	1182.293	-1.1402	0.63711	-0.43105
3.048	17.46	0.287599999999999	105.3996	0.33838	-0.013672	-0.15283	3.0221	14.482	10.7227	0.13163	-0.10719	-0.01133	60.7898	135.554	1389.144	-2.4609	0.80957	0.040039	112.604	-119.031	1199.645	-1.5704	0.73662	-0.34658
3.05	15.741	11.3035	149.9641	0.36758	-0.016113	-0.16699	-19.0795	5.7641	1.7182	0.14473	-0.11898	-0.038581	32.0532	129.443	1402.885	-2.3511	0.75635	0.035645	105.316	-171.263	1213.007	-2.0977	0.86133	-0.33984
3.052	23.555	19.6931	195.326	0.38799	-0.016504	-0.18555	-25.0838	-38.956	20.1753	0.15332	-0.12988	-0.061035	22.906	109.22	1368.6509	-2.2727	0.72192	0.036866	101.9435	-213.143	1162.68926	-2.6004	1.0383	-0.36973
3.054	19.762	16.5621	254.747	0.40596	-0.016504	-0.20234	18.7468	-19.6836	5.5831	0.16261	-0.13512	-0.080961	-19.2168	78.719	1366.502	-2.1934	0.68164	0.038086	116.45138	-316.114	1158.969	-2.9309	1.2453	-0.33184
3.056	38.771	27.5018	334.1675	0.41006	-0.012012	-0.22559	-1.0875	-24.8883	30.7864	0.16363	-0.14165	-0.10608	30.962	98.151	1335.2738	-2.0938	0.62598	0.037109	144.835	-333.0149	1193.505	-3.0406	1.4316	-0.24551
3.058	41.179	33.085	410.256	0.40576	-0.0063477	-0.24707	26.4694	-41.544	55.82036	0.15633	-0.15391	-0.14196	17.539	104.9399	1332.8164	-2.041	0.5957	0.040039	96.526	-323.354	1250.819	-3.0091	1.5472	-0.19502
3.06	48.134	45.309	451.483	0.38564	0.019141	-0.26953	25.6619	-21.8851	53.0054	0.13846	-0.15716	-0.17069	25.018	145.334	1296.728	-1.9429	0.54541	0.040527	81.497	-248.223	1240.986	-2.8784	1.6177	-0.19971
3.062	37.851	31.7725	468.819	0.34765	0.047949	-0.28975	-8.3089	-46.5946	51.739	0.12061	-0.15723	-0.19824	-24.823	149.699	1249.676	-1.8767	0.50904	0.043945	89.6722	-208.636	1193.321	-2.71	1.6389	-0.2502
3.064	11.521	17.3653	521.5454	0.28789	0.083496	-0.30811	61.626	-63.3827	84.347	0.087736	-0.14259	-0.21857	15.663	174.682	1194.482	-1.8105	0.47461	0.04248	113.83232	-201.34	1203.365	-2.5281	1.6469	-0.31347
3.066	-4.2331	9.892	601.55402	0.20381	0.12217	-0.3334	44.341	-63.4147	112.261	0.050832	-0.12587	-0.23666	-10.673	185.356	1191.824	-1.7188	0.43164	0.038574	129.502	-194.637174	1285.893	-2.325	1.6406	-0.36739
3.068	-45.3347	2.5316	635.5665	0.10205	0.1665	-0.35107	41.6259	-75.4744	171.641	-0.0049964	-0.10706	-0.25083	44.715	205.621	1163.3952	-1.6704	0.41016	0.041992	141.165	-225.01	1379.0925	-2.1208	1.5893	-0.42705
3.07	-26.367	7.2651	651.525	-0.015918	0.22657	-0.37188	71.736	-34.1428	210.6869	-0.07502	-0.08353	-0.25991	18.017	180.396	1158.791	-1.5776	0.37256	0.04248	118.52	-207.213	1416.282	-1.9395	1.4961	-0.47949
3.072	-34.2161	32.89986	691.022	-0.14453	0.28877	-0.39014	18.2521	3.182	235.4207	-0.15381	-0.058594	-0.27002	20.697	196.882	1107.977	-1.4839	0.33252	0.049316	91.3461	-270.303	1437.384	-1.832	1.3724	-0.51367
3.074	-42.8585	26.493	721.889	-0.27891	0.36025	-0.41084	29.05754	31.1473	311.607	-0.22847	-0.033424	-0.2814	4.139	175.575	1082.813	-1.437	0.31885	0.045898	39.04	-290.534	1456.547	-1.8018	1.2468	-0.5249
3.076	-13.0792	27.049	735.428	-0.42959	0.4415	-0.43194	39.6737	89.4286	363.912	-0.30875	-0.009384	-0.29321	38.12	215.764	1039.558	-1.3418	0.28125	0.045898	43.059	-351.711	1455.304	-1.8585	1.1308	-0.51592
3.078	8.434	20.15	725.816	-0.58545	0.53662	-0.4502	-10.2352	94.4013	455.671	-0.39107	0.014831	-0.30374	30.127	207.1158	1008.459	-1.2786	0.25903	0.049317	52.65	-368.61	1460.201	-1.9909	1.0528	-0.48389
3.08	-13.251	14.2337	737.412	-0.74639	0.65986	-0.45381	-3.7307	103.5346	559.804	-0.45372	0.040267	-0.2949	50.888	225.825	953.4555	-1.2188	0.23145	0.04834	71.384	-335.127	1441.193	-2.1738	1.0117	-0.45361
3.082	-65.549	-3.0382	792.385	-0.91435	0.78916	-0.45068	-40.659	112.4482	613.0884	-0.5249	0.057617	-0.28613	11.276	206.21	919.036	-1.1401	0.19873	0.044922	54.4271	-297.13	1475.035	-2.3592	1.0233	-0.43379
3.084	-33.84	-24.8029	804.215	-1.0757	0.9122	-0.4378	-49.012	66.202	682.8661	-0.6329	0.085516	-0.2749	1.148	207.3388	859.0162	-1.0991	0.18506	0.041992	27.7673	-209.737	1503.206	-2.5227	1.0692	-0.43301
3.086	-1.4848	-16.584	798.0996	-1.2315	1.0095	-0.41279	0.785	46.485	735.083	-0.76168	0.13813	-0.26789	14.881	195.43	835.489	-1.022	0.15479	0.043945	-10.172	-169.54	1555.7162	-2.6414	1.1551	-0.43887
3.088	25.768	-13.922	805.65	-1.3667	1.103	-0.396	-26.457	13.063	747.226	-0.89958	0.19556	-0.24406	56.4463	220.1094	807.7422	-0.96363	0.13379	0.04126	39.033	-111.5	1598.759	-2.7238	1.2644	-0.45098
3.09	7.297	-30.484	842.359	-1.4515	1.1568	-0.38457	13.235	-43.383	765.7059	-1.0528	0.25212	-0.20549	59.964	206.773	768.76	-0.91016	0.11621	0.043945	11.896	-116.271	1622.506	-2.7749	1.3774	-0.47217
3.092	-10.15	-39.383	860.9093	-1.5186	1.1728	-0.38653	10.9655	-39.67	741.8817	-1.2046	0.3208	-0.14697	51.249	215.54663	724.403	-0.82959	0.084473	0.037598	-14.9	-87.456	1608.0256	-2.8091	1.4851	-0.49346
3.094	-13.4665	-64.374	845.402	-1.5698	1.1809	-0.39941	-39.7486	-80.191	729.4248	-1.3822	0.38986	-0.083482	22.53	202.506	665.2709	-0.79297	0.064941	0.03125	-5.6199	-55.519	1592.566	-2.828	1.5852	-0.51768
3.096	-15.2519	-98.3559	874.368	-1.5935	1.1971	-0.42383	-8.057	-108.416	736.4753	-1.5738	0.47366	-0.021665	29.652	224.474	622.7241	-0.72412	0.033691	0.030762	-49.591	-4.65300000000001	1595.705	-2.8284	1.6661	-0.53799
3.098	-12.668	-125.229	930.334	-1.5913	1.2251	-0.45459	-30.9021	-101.388	746.6316	-1.7972	0.56037	0.025987	63.69	231.645	603.3014	-0.6648	0.01416	0.024414	-15.4916	22.03	1600.957	-2.8156	1.7238	-0.5543
3.1	-28.055	-134.016	980.085	-1.5396	1.2477	-0.48281	-14.0869	-101.653	783.3726	-2.0259	0.66593	0.053419	73.07365	236.253	565.334	-0.61182	-0.0078125	0.024902	-11.533	-21.395	1608.209	-2.7891	1.7598	-0.56836
3.102	16.146	-117.358	981.599	-1.4493	1.2774	-0.51484	-1.82294	-81.766	832.89	-2.2813	0.75488	0.059082	32.14	224.185	505.844	-0.53711	-0.037598	0.013184	-7.777	-22.349	1582.438	-2.7527	1.7789	-0.5751
3.104	-18.255	-112.271	993.8256	-1.3164	1.282	-0.55235	-48.695	-87.091	838.923	-2.5349	0.88895	-0.011421	35.0738	211.4694	478.738	-0.50537	-0.046387	0.0078125	-23.1724	-82.08	1583.045	-2.7164	1.7808	-0.57207
3.106	-20.532	-122.781	1029.546	-1.1713	1.2611	-0.59571	-40.8768	-115.994	875.58	-2.7003	1.0446	-0.094916	27.18	199.9815	415.464	-0.43115	-0.078613	0.0014648	5.0938	-52.239	1607.084	-2.6836	1.7715	-0.56504
3.108	26.661	-131.085	1080.3522	-1.0132	1.2134	-0.6333	-8.002	-98.127	903.513	-2.689	1.1591	-0.13555	30.662	196.991	406.762	-0.38818	-0.094725	-0.006836	2.8473	-45.604	1626.324	-2.6579	1.7519	-0.55146
3.11	40.221	-121.533	1114.2593	-0.85928	1.1343	-0.65108	-26.545	-122.429	961.1825	-2.5518	1.2006	-0.13926	27.311	198.299	388.091	-0.33936	-0.11377	-0.0092773	0.2157	-59.345	1653.985	-2.6309	1.7227	-0.53809
3.112	43.0233	-114.845	1146.6144	-0.7211	1.0246	-0.65625	38.0125	-131.776	999.3136	-2.3398	1.1875	-0.14551	37.2124	202.835	369.6669	-0.28516	-0.13379	-0.021484	61.734	-66.089	1617.371	-2.5911	1.6925	-0.51221
3.114	32.9116	-103.938	1150.7784	-0.61133	0.89063	-0.64336	32.0243	-111.699	974.096	-2.1223	1.1313	-0.1833	13.391	216.283	332.452	-0.26318	-0.14307	-0.026367	27.737	-77.495	1585.628	-2.551	1.6567	-0.49697
3.116	55.2568	-94.109	1153.4344	-0.53906	0.75078	-0.61992	33.5723	-149.354	983.497	-1.9415	1.0521	-0.2415	23.0169	202.239	320.393	-0.22363	-0.15283	-0.043945	59.41	-20.2978	1556.713	-2.5089	1.6099	-0.47823
3.118	36.804	-69.554	1155.712	-0.50342	0.62158	-0.59033	98.059	-168.335	1014.716	-1.8087	0.95439	-0.29854	2.01	195.345	270.069	-0.20288	-0.16064	-0.047119	29.294	27.682	1556.249	-2.4536	1.562	-0.45908
3.12	40.391	-47.539	1200.984	-0.54961	0.53243	-0.56992	54.863	-179.3713	1070.76	-1.722	0.8499	-0.33721	21.6528	175.077	284.3223	-0.17188	-0.18164	-0.046875	46.8217	98.234	1538.533	-2.3926	1.5137	-0.44043
3.122	53.81	-46.9158	1233.092	-0.6498	0.48868	-0.57266	80.276	-222.645	1158.3999	-1.6641	0.74219	-0.36914	19.808	187.035	238.086	-0.12842	-0.22461	-0.027344	67.588	113.179	1508.586	-2.3279	1.4682	-0.41855
3.124	22.883	-59.164	1251.4598	-0.79551	0.50899	-0.57617	44.8269	-207.683	1216.353	-1.6473	0.64531	-0.37529	24.5152	155.879	232.041	-0.10889	-0.23975	-0.025879	57.462	92.972	1448.9008	-2.2578	1.4222	-0.40078
3.126	24.881	-62.807	1261.3365	-0.96631	0.58018	-0.58682	-29.854	-190.769	1266.504	-1.6496	0.55469	-0.36933	-1.35899999999999	151.791	210.721	-0.087402	-0.27832	-0.015625	62.872	72.203	1387.512	-2.1828	1.3785	-0.38047
3.128	25.381	-58.2985	1306.96	-1.1387	0.67871	-0.61328	-20.151	-201.913	1320.73	-1.682	0.48242	-0.35566	3.308	124.1867	207.925	-0.076416	-0.29273	-0.011474	29.817	78.398	1364.7326	-2.1082	1.3289	-0.36055
3.13	50.56	-53.4632	1338.127	-1.2819	0.79268	-0.63877	-30.6927	-133.381	1315.0106	-1.7458	0.43272	-0.32685	2.049	145.948	170.2505	-0.072754	-0.2998	-0.011719	19.482	121.727	1342.024	-2.0308	1.2798	-0.34326
3.132	65.761	-57.67	1328.2497	-1.393	0.91524	-0.65019	12.5856	-123.223	1346.1129	-1.8379	0.41504	-0.29736	11.6446	123.39	141.8691	-0.069824	-0.30664	-0.014648	-7.1682	139.2586	1322.38	-1.9592	1.2305	-0.32754
3.134	54.602	-65.977	1310.078	-1.466	1.0313	-0.67246	53.98894	-117.775	1380.0197	-1.9456	0.4208	-0.27823	7.205	140.786	106.405	-0.070313	-0.30518	-0.016602	-3.27589	162.399	1276.408	-1.8905	1.1775	-0.31279
3.136	54.872	-70.604	1335.7791	-1.5176	1.1006	-0.70879	8.289	-71.954	1373.0852	-2.0586	0.45137	-0.28017	10.49	109.101	119.834	-0.070313	-0.29785	-0.015625	31.974	130.555	1246.613	-1.83	1.1255	-0.29443
3.138	59.32432	-54.229	1378.45	-1.5566	1.1719	-0.73828	47.576	-96.605	1392.507	-2.1683	0.48965	-0.28174	2.716	114.8026	70.8347	-0.067871	-0.28735	-0.0075684	23.5142	157.6138	1251.632	-1.7676	1.0698	-0.27764
3.14	56.7115	-32.961	1382.5386	-1.6059	1.235	-0.77978	87.939	-59.202	1415.0798	-2.2638	0.53945	-0.28369	21.348	75.607	82.195	-0.063965	-0.2793	0.0043945	8.256	194.06	1252.26	-1.7007	1.0142	-0.25879
3.142	23.719	-26.316	1366.331	-1.6522	1.2912	-0.82139	24.8263	-43.116	1414.18	-2.3594	0.59863	-0.29102	33.169	74.431	56.438	-0.068848	-0.26807	0.0087891	-1.314	226.617	1243.133	-1.6443	0.95918	-0.24678
3.144	46.961	-37.8599	1379.49	-1.6831	1.3649	-0.84131	59.5092	-93.998	1427.8044	-2.4449	0.67148	-0.3001	10.1004	20.258	70.478	-0.069336	-0.26416	0.016113	17.6162	236.822	1194.553	-1.5741	0.90948	-0.23359
3.146	15.104	-42.167	1373.99	-1.7236	1.4193	-0.87402	36.932	-52.488	1401.925	-2.5253	0.74698	-0.31231	9.599	39.613	45.11	-0.080078	-0.24902	0.032715	5.652	176.532	1157.706	-1.5081	0.85517	-0.22031
3.148	2.416	-27.8116	1356.79	-1.752	1.4629	-0.91406	-3.245	-69.014	1404.04	-2.6053	0.82314	-0.33262	-0.0960000000000001	26.202	47.253	-0.083008	-0.24732	0.045654	22.4653	162.11927	1133.709	-1.4354	0.80527	-0.21055
3.15	-5.384	-15.76969	1355.36332	-1.7635	1.5173	-0.9377	21.1386	-79.339	1458.922	-2.6768	0.90371	-0.36973	25.233	57.871	11.8679	-0.098145	-0.23535	0.061035	15.813	156.6372	1096.997	-1.3589	0.75244	-0.20264
3.152	16.334	-11.136	1375.1361	-1.7837	1.547	-0.96826	-35.768	-48.515	1471.207	-2.7402	0.98535	-0.4248	48.9599	19.86	35.0483	-0.11328	-0.2207	0.077148	6.558	217.803	1053.9615	-1.2797	0.70078	-0.19531
3.154	-4.528	-15.2066	1385.386925	-1.7993	1.5704	-1.0034	6.373	-93.794	1523.904	-2.7622	1.053	-0.47754	10.862	4.4448	-4.874	-0.12158	-0.21875	0.081055	0.395	255.515	979.396	-1.2014	0.65088	-0.18847
3.156	-7.51000000000001	-7.347	1348.711	-1.798	1.5959	-1.0231	53.8302	-74.077	1532.384	-2.7518	1.0985	-0.52061	-21.9823	-30.783	-5.704	-0.13037	-0.20459	0.095703	-15.2621	264.138	943.267	-1.1261	0.59931	-0.18262
3.158	34.251	12.927	1359.66	-1.7866	1.6147	-1.0386	15.288	-63.572	1506.976	-2.7022	1.1137	-0.55225	-0.891999999999999	-13.2225	-18.2938	-0.13867	-0.19262	0.098387	-1.464	259.299	884.458	-1.0508	0.55293	-0.18183
3.16	75.4054	37.266	1372.3572	-1.7863	1.6141	-1.0537	76.25	-78.735	1527.44	-2.6385	1.1065	-0.56797	11.8678	-14.19	0.4817	-0.14209	-0.18115	0.10547	27.109	230.3569	873.652	-0.9751	0.51221	-0.17871
3.162	60.625	30.4353	1379.845	-1.7659	1.6189	-1.0534	98.21	-14.609	1511.1588	-2.5698	1.0728	-0.57764	28.903	16.3191	21.3496	-0.13965	-0.16455	0.11377	74.18	233.2769	871.317	-0.89619	0.46904	-0.17334
3.164	31.531	10.668	1366.185	-1.7527	1.6212	-1.0503	66.069	-15.538	1501.509	-2.5047	1.0242	-0.59336	13.619	-0.9508	13.6123	-0.13525	-0.15869	0.11426	56.6637	212.9611	835.047	-0.8207	0.42578	-0.16612
3.166	38.458	7.9621	1370.9072	-1.7376	1.6003	-1.0534	75.587	-34.258	1514.365	-2.4457	0.96514	-0.59883	-9.973	19.133	-26.7055	-0.12549	-0.14502	0.12012	33.8516	265.906	778.912	-0.74531	0.38164	-0.16143
3.168	79.09521	6.9926	1380.365	-1.7246	1.5762	-1.0566	33.4572	9.846	1486.473	-2.402	0.90732	-0.59805	-29.5809	3.9759	-25.005	-0.11743	-0.14209	0.12671	64.17821	267.124	693.5619	-0.67216	0.33076	-0.17129
3.17	60.8986	-2.289	1361.057	-1.7031	1.5523	-1.0466	38.5314	-26.953	1509.614	-2.3631	0.84863	-0.5955	7.585	32.1864	-2.4565	-0.10645	-0.13525	0.13281	55.5393	273.01	640.7634	-0.59863	0.28467	-0.16211
3.172	22	-0.538	1328.2604	-1.6839	1.5173	-1.0413	62.7844	32.5984	1510.5224	-2.3335	0.79541	-0.59131	-8.73	29.335	3.5441	-0.09375	-0.12744	0.13916	51.8872	243.4194	598.83	-0.52822	0.24356	-0.16357
3.174	68.019	24.1845	1333.8205	-1.6589	1.4767	-1.0343	14.61	83.941	1476.942	-2.3117	0.75039	-0.58652	3.037	47.0285	-1.647	-0.086426	-0.12793	0.15186	73.3436	195.536	574.1365	-0.45811	0.20381	-0.16006
3.176	83.0041	39.6243	1323.2776	-1.6308	1.4395	-1.0099	41.6298	56.235	1483.9037	-2.291	0.71972	-0.58067	4.901	29.9924	-16.7544	-0.075684	-0.12695	0.15039	79.107	189.134	511.95	-0.38701	0.17295	-0.17803
3.178	36.427	26.78081	1311.3182	-1.6167	1.3989	-0.98975	14.778	102.17	1468.2939	-2.2821	0.69746	-0.56426	-7.006	28.8274	-2.8671	-0.068604	-0.12671	0.15454	47.1162	163.951	484.2426	-0.35625	0.15185	-0.19824
3.18	48.273	32.2207	1302.3496	-1.5977	1.3566	-0.96992	32.3855	64.5717	1446.0584	-2.2779	0.6873	-0.54463	-42.5874	9.3415	2.7239	-0.063965	-0.12744	0.15527	42.7397	170.504	453.50195	-0.31934	0.11426	-0.19092
3.182	115.986	45.489	1317.253	-1.5839	1.3204	-0.94443	82.7896	32.22044	1444.9111	-2.2808	0.67725	-0.52686	-17.768	32.7492	25.7095	-0.058594	-0.12891	0.16162	48.44	149.569	418.004	-0.25908	0.048926	-0.17442
3.184	106.1149	70.487	1290.978	-1.5726	1.288	-0.91357	50.529	78.599	1420.3916	-2.2883	0.68379	-0.50938	1.05	36.2229	17.7916	-0.054199	-0.12793	0.16602	67.034	163.801	351.8923	-0.19219	-0.010742	-0.15488
3.186	65.665	80.093	1243.6942	-1.5749	1.2587	-0.89209	99.412	22.4424	1417.5572	-2.2961	0.69258	-0.49317	15.535	45.6615	21.1711	-0.041992	-0.12891	0.15967	82.9287	174.801	305.141	-0.12109	-0.065039	-0.14121
3.188	61.447	89.014	1226.48668	-1.5869	1.2363	-0.87744	66.9557	36.518	1418.227	-2.2965	0.70313	-0.47949	2.42	15.20156	2.877	-0.031982	-0.13672	0.15552	56.1792	195.7895	278.153	-0.053321	-0.1127	-0.14014
3.19	78.445	82.497	1244.674	-1.6087	1.2226	-0.85986	11.405	50.588	1375.378	-2.2888	0.71768	-0.46543	-17.1821	11.434	25.6017	-0.015137	-0.13916	0.14893	25.6624	191.1697	263.776	0.0068359	-0.15137	-0.14795
3.192	43.749	69.6549	1225.821	-1.6273	1.2111	-0.84316	78.337	12.862	1381.2669	-2.2676	0.72852	-0.45117	0.633000000000003	-2.709	-3.1752	0.0053711	-0.14453	0.14551	6.305	185.534	243.744	0.058886	-0.18232	-0.15986
3.194	32.981	52.64109	1192.0779	-1.6445	1.2096	-0.83067	45.8099	62.366	1373.944	-2.2325	0.73428	-0.43887	0.872	11.5899	32.582	0.015625	-0.14648	0.13623	27.908	180.866	199.405	0.1044	-0.20859	-0.17158
3.196	13.851	40.292	1177.8907	-1.6658	1.2014	-0.82598	0.327000000000002	64.743	1315.224	-2.1875	0.73399	-0.43008	5.175	13.8079	16.1548	0.040039	-0.15479	0.12988	36.31	146.137	154.883	0.13994	-0.22656	-0.1876
3.198	28.305	46.739	1170.2	-1.6787	1.2021	-0.81836	51.9094	46.683	1299.237	-2.1375	0.72773	-0.41211	10.6533	22.6235	50.346	0.061279	-0.15894	0.1167	25.684	171.328	123.508	0.17129	-0.24062	-0.19815
3.2	9.47	55.3138	1146.957	-1.682	1.1984	-0.80625	-17.585	88.0644	1262.07	-2.0799	0.71953	-0.39961	15.114	24.0023	21.1331	0.080078	-0.16406	0.11133	14.148	147.611	118.013	0.18066	-0.25293	-0.2085
3.202	10.289	51.8816	1097.68	-1.6721	1.2028	-0.79834	14.509	52.4067	1234.26058	-2.0215	0.7041	-0.37939	22.46088	15.8166	15.4404	0.11621	-0.17627	0.10205	-4.044	162.552	101.7188	0.18428	-0.25137	-0.21963
3.204	32.002	66.485	1082.1175	-1.6549	1.1958	-0.79131	42.5465	76.7791	1209.22176	-1.9625	0.69375	-0.36875	-11.195	7.4439	-7.2824	0.1333	-0.18701	0.09375	-12.0745	137.864	98.3182	0.17793	-0.25215	-0.21299
3.206	32.449	70.09	1087.787	-1.6166	1.1885	-0.78222	12.2501	102.807	1159.6241	-1.9016	0.67852	-0.35117	15.687	11.297	24.324	0.16016	-0.19385	0.075195	-11.894	100.8487	85.31476	0.14941	-0.24434	-0.20478
3.208	21.19	71.111	1057.958	-1.5762	1.1777	-0.77734	48.7393	73.189	1130.20278	-1.8422	0.66445	-0.33828	0.0259999999999962	5.122	5.29809	0.18042	-0.19971	0.062256	9.306	86.09	60.066	0.10772	-0.22725	-0.20166
3.21	16.474	76.096	1032.448	-1.5226	1.1659	-0.76778	45.6634	141.983	1103.9248	-1.7801	0.65547	-0.30732	23.9792	-0.545000000000002	15.441	0.19531	-0.20605	0.046875	17.65	44.5808	43.8675	0.061035	-0.20215	-0.19092
3.212	28.466	98.008	1045.931	-1.4723	1.1507	-0.75664	13.5184	137.393	1046.109	-1.7202	0.64697	-0.29004	18.876	6.91844	1.1588	0.21484	-0.2168	0.031738	7.487	53.382	53.3709	0.01084	-0.17461	-0.1791
3.214	24.222	122.063	1021.426	-1.4223	1.1351	-0.74726	58.2402	89.2688	1031.214	-1.6611	0.64082	-0.2751	0.4337	2.171	16.5704	0.21826	-0.21436	0.019531	-14.985	21.1001	73.489	-0.030176	-0.1414	-0.15586
3.216	10.004	101.8529	974.247	-1.3706	1.122	-0.73037	16.294	130.69	1000.5265	-1.6039	0.63906	-0.25273	5.442	6.6848	11.477	0.22705	-0.20703	0.0073242	-3.1965	15.64	84.821	-0.061035	-0.11563	-0.13984
3.218	-1.71599999999999	91.42	949.281	-1.3203	1.1035	-0.7168	30.5833	57.833	995.6265	-1.5524	0.63203	-0.23047	-20.8841	-4.78	4.8151	0.22461	-0.19629	-0.0087891	36.389	-10.5293	56.644	-0.088183	-0.080274	-0.11162
3.22	-10.606	106.5624	951.2868	-1.2765	1.0802	-0.69522	20.834	93.569	964.2227	-1.4929	0.62959	-0.20586	-15.713	14.4635	-22.1482	0.21777	-0.18652	-0.0097656	30.291	-6.28633	30.7115	-0.12402	-0.04834	-0.088379
3.222	41.82744	108.42935	931.1055	-1.2335	1.0505	-0.67705	-36.42	134.9198	925.525	-1.438	0.62549	-0.18457	7.147	-1.718	3.279	0.20557	-0.1748	-0.0087891	35.8735	6.881	18.1111	-0.15781	-0.020703	-0.06582
3.224	21.547	115.3951	890.8578	-1.1929	1.0255	-0.66143	16.6376	95.695	893.075	-1.3881	0.61465	-0.16719	31.114	7.7914	-4.9192	0.1897	-0.15771	-0.010986	21.1583	14.5371	10.6481	-0.20244	0.0054688	-0.043652
3.226	31.864	92.1626	851.3837	-1.1561	1.0068	-0.6417	32.7638	162.2452	847.815	-1.334	0.60469	-0.1501	-4.6217	-15.4759	14.9857	0.17139	-0.14551	-0.010254	-12.942	21.0715	-6.811	-0.24033	0.039063	-0.029199
3.228	35.596	111.477	840.9015	-1.1226	0.98584	-0.62646	-20.7329	150.069	803.848	-1.2836	0.59258	-0.12939	-19.564	12.616	-24.216	0.12891	-0.12549	-0.0063477	5.266	-31.278	-11.09769	-0.2709	0.072461	-0.01543
3.23	49.8536	123.916	831.8662	-1.0917	0.97158	-0.60615	32.7367	124.579	800.526	-1.2334	0.57774	-0.11777	-15.7274	-1.1382	-10.2131	0.10938	-0.11279	-0.0053711	8.9049	-14.599	-5.6163	-0.29492	0.099609	-0.0039063
3.232	39.4887	124.074	806.315	-1.0656	0.94952	-0.5917	18.7828	196.402	746.2754	-1.1831	0.56201	-0.10352	-10.949	33.292	-3.126	0.068848	-0.089355	0.0073242	22.1143	-43.957	12.60594	-0.30342	0.11602	0.010742
3.234	38.76135	118.239	792.854	-1.0413	0.94131	-0.57373	10.9168	135.4108	752.6779	-1.1431	0.54414	-0.10742	2.256	16.3816	22.379	0.046387	-0.068115	0.013183	10.6295	-0.173999999999999	23.38	-0.30869	0.1295	0.022168
3.236	38.2707	100.4344	804.175	-1.0159	0.93154	-0.55713	45.222	173.894	710.566	-1.0942	0.53321	-0.091211	16.619	41.012	-10.84142	0.027832	-0.04248	0.018555	17.6117	26.62521	-6.7628	-0.304	0.14004	0.03584
3.238	19.81	110.7971	776.5489	-0.99365	0.91846	-0.54395	-10.7295	190.2	645.132	-1.0297	0.51172	-0.074414	-14.5816	12.759	-6.644	0.010742	-0.019043	0.03418	20.4448	42.6822	-23.0146	-0.2918	0.14082	0.048731
3.24	0.330000000000002	132.082	736.9593	-0.97002	0.90889	-0.52822	3.3536	139.047	631.603	-0.97519	0.48457	-0.063379	-14.708	39.384	-17.3446	-0.0053711	-0.012207	0.034668	21.4763	52.02	-35.5267	-0.27246	0.14258	0.069336
3.242	4.397	128.451	700.5825	-0.95469	0.89844	-0.51348	-29.2912	203.5763	586.3452	-0.91797	0.45801	-0.04834	-28.18949	8.5674	-6.1644	-0.04248	0.0063477	0.033691	28.356	2.1396	-22.4409	-0.2459	0.13223	0.076562
3.244	0.848000000000003	131.577	677.2575	-0.93594	0.88984	-0.49707	-39.414	189.0358	549.086	-0.8668	0.42988	-0.045606	2.926	52.22996	6.6506	-0.07666	0.026611	0.02539	0.0775999999999999	7.09926	-12.5539	-0.20986	0.10781	0.083985
3.246	-2.346	125.6274	641.8404	-0.91524	0.87871	-0.48067	4.6884	168.139	538.0213	-0.81719	0.41289	-0.043262	16.741	29.4813	9.1812	-0.10352	0.044922	0.013672	1.9638	-24.1631	6.8782	-0.17392	0.076953	0.086719
3.248	10.895	106.3581	618.8437	-0.89404	0.87158	-0.46436	-32.8763	213.37	499.7897	-0.76445	0.38828	-0.031543	28.725	48.04	23.0171	-0.12793	0.070313	-0.0029297	4.2893	-1.8176	4.23017	-0.12598	0.042969	0.0875
3.25	-1.811	97.126	617.178	-0.87295	0.85635	-0.4542	-26.2504	130.7852	478.7433	-0.71709	0.36143	-0.024023	11.28	8.4632	29.8898	-0.13477	0.07959	-0.020508	-13.879	1.949	4.374	-0.081055	0.0058594	0.096191
3.252	-22.3812	107.9768	597.1676	-0.84366	0.83838	-0.43897	-23.5992	151.5068	454.0104	-0.66992	0.33301	-0.018555	-13.317	27.8185	17.6543	-0.13721	0.094238	-0.040527	-9.544	23.3709	-1.212	-0.031738	-0.032227	0.095215
3.254	-5.533	117.769	563.9792	-0.80889	0.82314	-0.42607	-45.657	166.903	425.981	-0.63311	0.30839	-0.013672	-9.111	0.891399999999999	29.0709	-0.13452	0.1023	-0.055664	-11.1568	30.711	-1.685	0.021387	-0.078223	0.098144
3.256	-4.292	122.55	519.317	-0.77334	0.80185	-0.40674	-13.2759	131.5277	418.7187	-0.59687	0.28359	-0.0125	25.596	27.75	10.7997	-0.12793	0.10596	-0.07373	-8.7057	16.0014	2.64828	0.067871	-0.1208	0.10909
3.258	-34.1045	113.165	504.74	-0.73535	0.77734	-0.3877	10.4042	185.519	394.0512	-0.56211	0.26524	-0.013282	16.391	-4.1796	11.583	-0.11426	0.10254	-0.097656	-1.1955	23.369	-2.886	0.10029	-0.16318	0.11308
3.26	-43.9979	130.771	491.611	-0.69707	0.74805	-0.37959	-32.2244	142.635	361.53796	-0.52725	0.25049	-0.010058	31.1613	24.4834	11.034	-0.1084	0.10107	-0.10693	5.2342	2.19086	16.0788	0.11865	-0.19531	0.11328
3.262	-5.8962	131.57	461.503	-0.65293	0.71884	-0.36191	-24.7247	131.5416	337.3258	-0.48633	0.22998	-0.0048828	14.441	-4.091	1.7814	-0.094238	0.084473	-0.12988	-5.6585	29.4865	18.41394	0.11845	-0.21406	0.1042
3.264	-18.6774	115.465	452.3403	-0.60606	0.68369	-0.34707	-41.328	157.789	317.381	-0.44453	0.20967	0.006543	4.927	35.831	21.6896	-0.086426	0.073731	-0.14673	2.2518	0.363999999999997	12.9713	0.11142	-0.22236	0.091797
3.266	-47.8512	117.891	435.10569	-0.56221	0.64228	-0.33135	-35.841	108.15231	289.4892	-0.40263	0.18427	0.014062	-9.865	10.6976	28.844464	-0.075684	0.058105	-0.16113	-14.4207	20.084	7.7568	0.10909	-0.23056	0.082031
3.268	-22.992	112.9173	413.6958	-0.521	0.604	-0.32324	-21.7945	133.323	273.4755	-0.36474	0.16319	0.023828	-0.263000000000002	26.1958	33.3679	-0.063965	0.031738	-0.17676	-7.23	20.6491	10.6823	0.12285	-0.23408	0.074512
3.27	-8.193	118.905	396.899	-0.47754	0.57324	-0.30078	-68.005	127.44	246.8813	-0.33272	0.14619	0.023145	9.767	-14.1782	40.756	-0.061035	0.019531	-0.18652	18.8484	31.253	27.5201	0.1416	-0.23535	0.072266
3.272	-8.076	106.289	378.4194	-0.44111	0.54375	-0.2833	-7.9604	67.983	232.67724	-0.30078	0.13232	0.027344	7.719	-31.0347	63.211	-0.058105	-0.011719	-0.2124	22.6433	39.098	33.7942	0.16377	-0.24004	0.07041
3.274	-16.3043	94.293	362.3877	-0.40947	0.51289	-0.26963	-10.3159	119.297	215.6676	-0.2668	0.10821	0.035547	0.120000000000001	-71.25	61.7208	-0.059814	-0.036621	-0.23047	-2.504	7.323	25.735	0.18662	-0.23515	0.063867
3.276	17.7671	86.57796	333.7637	-0.38506	0.4876	-0.25654	-16.1945	92.731	195.7981	-0.24365	0.087988	0.03545	-22.7571	-47.887	95.7661	-0.061035	-0.055176	-0.24756	29.5356	-9.73696	23.8785	0.20616	-0.23047	0.052929
3.278	0.76	91.0253	309.387	-0.36084	0.46338	-0.24512	10.3791	86.5208	184.3867	-0.21787	0.067285	0.04209	-28.2954	-48.987	110.155	-0.086914	-0.067383	-0.26758	-9.738	-61.099	10.21	0.22569	-0.22549	0.039258
3.28	-2.158	94.278	295.7803	-0.33427	0.4414	-0.23261	-17.6815	134.144	149.5377	-0.19707	0.050098	0.047559	20.472	-31.0388	185.9495	-0.10742	-0.072754	-0.2749	0.797600000000001	-29.22	2.565	0.23877	-0.21924	0.020996
3.282	-1.015	92.556	279.1322	-0.31113	0.41758	-0.21426	12.803	84.582	131.7488	-0.17285	0.028809	0.057617	26.245	-44.205	204.76	-0.16699	-0.075684	-0.29053	29.1597	-14.7412	9.9364	0.25801	-0.21211	0.0020508
3.284	8.467	92.248	261.3054	-0.29082	0.39531	-0.20059	12.3474	99.786	103.8194	-0.15049	0.016797	0.064648	46.281	-32.004	256.379	-0.22705	-0.063476	-0.28906	27.2004	6.0451	3.1727	0.27168	-0.20986	-0.023242
3.286	10.752	97.389	253.9334	-0.26846	0.37569	-0.18789	-31.6707	80.128	102.96451	-0.13995	0.00029294	0.061133	41.72	-24.747	319.131	-0.3042	-0.046387	-0.28662	6.347572	-3.5503	10.2998	0.27949	-0.20478	-0.047461
3.288	5.069	95.408	251.9737	-0.25195	0.35449	-0.17627	13.9284	18.489	107.45557	-0.13291	-0.0067383	0.063868	0.722999999999999	23.036	413.6658	-0.42236	-0.024902	-0.2666	-2.552	-13.6668	4.9407	0.28555	-0.19629	-0.080957
3.29	23.2936	92.9611	268.938	-0.23691	0.33496	-0.1666	-0.4771	65.717	90.525	-0.11836	-0.011621	0.06748	-22.816	40.457	455.667	-0.4873	-0.010742	-0.25684	12.424	16.26757	-14.1096	0.28809	-0.18018	-0.10889
3.292	11.403	88.9151	229.87	-0.22422	0.31709	-0.15605	-14.086361	52.57761	68.4859	-0.10352	-0.01709	0.067383	2.83	70.322	562.4747	-0.62939	0.016602	-0.22705	12.589	14.2936	-6.9559	0.27597	-0.16348	-0.14112
3.294	4.255	82.338	199.5811	-0.21094	0.30616	-0.13379	29.3596	33.043	44.7422	-0.081934	-0.02041	0.066504	32.268	57.207	649.023	-0.75122	0.033936	-0.20166	32.7296	39.255	-2.175	0.25947	-0.1333	-0.16113
3.296	4.653	72.6888	171.712	-0.19717	0.29336	-0.12266	-7.421	52.8207	26.3031	-0.054395	-0.021973	0.065234	29.001	39.205	753.849	-0.91113	0.033203	-0.1543	13.452	-5.17	-8.1355	0.23096	-0.098144	-0.18301
3.298	3.747	70.812	153.81126	-0.18457	0.28174	-0.11377	2.797	3.491	24.228	-0.022754	-0.028223	0.065625	22.179	2.966	819.928	-1.2046	0.02002	-0.083496	2.1466	9.6049	-17.86849	0.19366	-0.059375	-0.1913
3.3	1.682	72.481	136.671	-0.16943	0.26845	-0.10293	41.7214	20.7251	13.1047	0.0029296	-0.033984	0.061816	40.48	-24.039	885.3983	-1.3711	0.038086	-0.054688	-13.6799	0.1499	-19.3509	0.14648	-0.022461	-0.19678
3.302	-10.7574	63.544	133.9398	-0.15205	0.25302	-0.090137	-26.3502	16.5273	-1.00851	0.028809	-0.040527	0.050781	39.435	-52.354	932.708	-1.7051	0.1123	-0.013184	5.875	20.7319	6.7469	0.097266	0.0082034	-0.19609
3.304	-7.723	46.553	132.3216	-0.13643	0.24209	-0.074512	14.4913	-15.7388	17.1502	0.056445	-0.037012	0.039258	92.1745	-101.903	994.961	-1.9382	0.20654	0.046631	1.6818	51.892	3.005	0.053711	0.040918	-0.19219
3.306	-1.321	52.55199	137.753	-0.11816	0.22695	-0.06377	16.964	26.8039	21.055	0.086816	-0.040137	0.031152	100.939	-127.564	954.257	-2.1763	0.30225	0.11475	-24.9511	25.4489	-14.425	0.018164	0.070996	-0.17734
3.308	1.245	67.719	115.6907	-0.10059	0.21338	-0.052734	0.211	8.7162	7.1256	0.11611	-0.043261	0.020606	100.928	-168.5841	958.436	-2.5073	0.44678	0.17725	9.5404	23.181	-19.521	0.0017578	0.10098	-0.16367
3.31	-25.761	67	102.0378	-0.080957	0.2	-0.043555	21.3219	9.2794	-12.868	0.14619	-0.052637	0.010449	61.981	-177.9531	937.984	-2.6597	0.52881	0.18555	-7.958	-1.3473	-3.4747	-0.013184	0.11572	-0.14941
3.312	-32.24	65.8737	88.3069	-0.063477	0.18721	-0.036425	-14.338	25.8377	-19.4289	0.16846	-0.056152	0.0078125	-0.978000000000002	-211.605	1003.379	-2.8569	0.69775	0.17334	-11.4382	-1.1399	24.199	-0.055957	0.13448	-0.15176
3.314	-26.298	68.2942	66.75894	-0.045508	0.1708	-0.030566	-5.296	-12.9862	-5.396	0.19053	-0.064551	-0.0017578	-34.5645	-180.7571	1049.729	-2.8657	0.84033	0.13964	10.197	2.567	39.1224	-0.11231	0.16612	-0.15469
3.316	-14.3596	65.954	46.3088	-0.027735	0.15664	-0.023047	-16.1106	12.6168	-20.9157	0.2039	-0.068262	-0.0022461	-26.394	-203.332	1098.669	-2.8003	0.9624	0.084961	8.8072	14.004	22.9592	-0.15879	0.19776	-0.16954
3.318	2.227	50.999	45.87	-0.0083008	0.14453	-0.018555	-4.51	24.9292	-18.5905	0.21992	-0.076074	-0.0092774	-14.6508	-202.955	1123.278	-2.6191	1.0762	-0.026855	-4.8622	11.685	24.2645	-0.18515	0.22812	-0.2
3.32	-22.1612	42.948	52.493	0.008301	0.12666	-0.0088867	29.073	-18.0843	-12.2127	0.2331	-0.080664	-0.0058593	-33.5259	-265.449	1154.436	-2.5132	1.1177	-0.079102	-13.9183	8.3915	21.9828	-0.19531	0.25195	-0.2251
3.322	-14.607	37.4478	25.7241	0.020313	0.11631	-0.0023438	-2.212	17.6177	-16.0267	0.24512	-0.085449	-0.0024414	-40.45	-218.5855	1156.807	-2.2964	1.147	-0.17041	0.8014	39.8847	20.7247	-0.19317	0.26455	-0.25567
3.324	-19.024	52.044	17.06179	0.036328	0.10537	0.003125	-15.9351	-6.5875	-3.8193	0.25371	-0.090332	-0.0018554	-20.2276	-204.603	1181.6977	-2.1628	1.1067	-0.21875	4.513	4.4704	28.4312	-0.17647	0.27265	-0.28155
3.326	-3.51000000000001	43.042	37.19	0.04834	0.087891	0.0097655	19.574	2.327	-4.7421	0.26142	-0.095411	-0.00087888	-1.888	-118.33	1211.067	-2.0605	1.0273	-0.2627	20.8318	20.5315918	18.5111	-0.14951	0.2793	-0.30068
3.328	-2.654	33.6267	46.3752	0.060547	0.077637	0.019531	7.56204	51.33	-14.0434	0.26729	-0.098145	0.0038086	-14.5688	-162.606	1259.055	-1.9902	0.8667	-0.27734	-0.4965	-25.974	-3.7641	-0.11641	0.27539	-0.31592
3.33	9.209	19.3973	26.1597	0.072656	0.066601	0.028223	10.9585	4.5153	12.7582	0.27666	-0.10117	0.0019532	-20.4195	-148.389	1280.867	-1.9727	0.78027	-0.26953	-4.4126	-13.0411	-12.199	-0.080078	0.26367	-0.32861
3.332	11.668	11.4171	7.148	0.088965	0.053418	0.036523	10.3408	17.3517	9.77577	0.28955	-0.10596	-0.0019531	-34.4224	-235.151	1294.95	-1.978	0.59619	-0.24219	11.446	-9.662	2.921	-0.038672	0.23887	-0.33799
3.334	6.623	19.8287	10.508	0.10342	0.038965	0.04082	-8.3904	25.273	-9.9875	0.29804	-0.11152	-0.010156	1.184	-193.3974	1336.2808	-2.0081	0.46436	-0.21582	27.186	-6.6502	23.00744	-0.0026368	0.21133	-0.35088
3.336	30.919	21.1281	35.144	0.11494	0.02666	0.047949	24.6513	3.5412	-6.3479	0.3045	-0.11357	-0.025586	-34.5347	-258.619	1381.6813	-2.0488	0.34961	-0.1792	14.6368	39.63	16.7395	0.034472	0.17813	-0.35439
3.338	29.6418	24.9906	8.8719	0.12842	0.0087891	0.054199	2.037	45.598	-8.5238	0.31191	-0.11592	-0.038476	-87.314	-208.269	1375.834	-2.125	0.24512	-0.11816	7.7487	0.69216	38.0294	0.061719	0.14483	-0.37002
3.34	7.713	18.693	7.5417	0.14277	-0.0020508	0.058008	-13.962	15.3466	7.3845	0.32021	-0.11172	-0.051074	-84.481	-264.365	1384.3659	-2.1758	0.21484	-0.096191	2.83756	-7.48669	52.0145	0.07959	0.10596	-0.39111
3.342	28.6149	5.31249	10.8347	0.15625	-0.015136	0.059766	29.854	0.00300000000000011	29.9789	0.32275	-0.10498	-0.071777	-48.687	-213.196	1406.6081	-2.2827	0.19873	-0.053223	-12.1591	-57.306	84.4829	0.071289	0.063379	-0.42842
3.344	28.2982	8.4503	37.117	0.17031	-0.033496	0.064453	-1.054	30.804	3.5932	0.32949	-0.10244	-0.085547	-15.939	-270.854	1442.1886	-2.3706	0.2163	-0.038818	26.153	-33.744	119.82135	0.044824	0.028125	-0.45615
3.346	16.994	8.64705	26.1769	0.18369	-0.048536	0.063769	32.947	-0.3446	7.65509	0.32686	-0.091895	-0.097559	5.38	-192.241	1490.59412	-2.4546	0.25537	-0.041016	26.103	-4.0723	139.36	-0.012988	0.028515	-0.46982
3.348	8.767	11.93137	18.049	0.19629	-0.064941	0.064941	26.303	8.7647	11.3308	0.32022	-0.07666	-0.10537	43.352	-187.631	1512.943	-2.5586	0.32568	-0.052246	28.8412	11.6291	174.537	-0.11006	0.055468	-0.46641
3.35	19.248	15.1737	-1.283	0.20713	-0.080371	0.059277	-14.3135	22.9094	7.7182	0.31201	-0.067579	-0.11191	64.5	-90.391	1515.825	-2.6074	0.37207	-0.068359	48.529	8.6644	217.922	-0.2417	0.10645	-0.45313
3.352	6.661	19.7667	-6.5969	0.21299	-0.094434	0.052539	23.88825	-3.5742	5.0861	0.29639	-0.053711	-0.11133	77.7753	-97.431	1484.429	-2.6895	0.47461	-0.097656	14.205	6.743	318.479	-0.39307	0.17119	-0.42393
3.354	0.785	23.1131	0.73633	0.21533	-0.10459	0.04668	11.698	29.495	-0.7648	0.2794	-0.040625	-0.10977	115.075114	-46.754	1452.113	-2.7393	0.55615	-0.12598	23.144	62.396	482.22	-0.54805	0.24395	-0.38047
3.356	-6.016	29.8654	1.3118	0.2164	-0.10986	0.037695	-3.2075	8.9725	14.9171	0.25185	-0.024805	-0.10254	141.099	-75.586	1462.876	-2.7734	0.63379	-0.16016	56.763	62.982	670.691	-0.69766	0.30527	-0.33946
3.358	8.795	23.4916	12.8789	0.21729	-0.11377	0.032227	19.5555	-20.7384	21.5011	0.22529	-0.0087892	-0.099807	139.829	-52.473	1509.3994	-2.7969	0.72266	-0.20898	71.287	69.552	798.166	-0.85186	0.35508	-0.31074
3.36	-7.393	22.97977	15.481	0.2083	-0.11855	0.028125	-11.3749	17.9593	22.4925	0.20518	0.0056641	-0.083985	85.0668	-74.746	1506.376	-2.7964	0.7788	-0.24951	39.124	0.404999999999998	890.747	-1.0332	0.39746	-0.29199
3.362	-8.531	14.79222	14.5087	0.20176	-0.1167	0.024414	-4.1257	-3.842	11.6588	0.17383	0.01709	-0.076172	47.0532	-58.4675	1530.8035	-2.7773	0.83008	-0.28516	45.788	-39.058	1024.591	-1.3347	0.41045	-0.22998
3.364	-17.915	9.15762	20.3781	0.19082	-0.10928	0.019727	8.6589	4.4615675	6.25121	0.15225	0.028418	-0.06748	61.2894	-79.202	1524.209	-2.7363	0.875	-0.32275	58.264	-98.32	1158.506	-1.7676	0.45645	-0.19785
3.366	-14.057	21.8614	12.5488	0.18184	-0.10254	0.01377	-22.3283	7.9236	-1.2705	0.13565	0.040332	-0.061524	74.672	-63.036	1516.5	-2.709	0.88672	-0.33643	88.8606	-137.828	1243.6349	-2.2828	0.59433	-0.2377
3.368	-1.8	14.4069	4.7084	0.16699	-0.092773	0.0097656	4.403	-33.116	5.3969	0.12275	0.05166	-0.055664	110.495	-58.15467	1484.835	-2.6328	0.88672	-0.35938	62.923	-151.697	1229.418	-2.7774	0.83438	-0.27422
3.37	-24.5725	13.17684	1.6513	0.14961	-0.079394	0.0089844	10.552	10.3449	-6.0254	0.1086	0.056934	-0.050781	112.843	-36.7514	1501.144	-2.574	0.86206	-0.36646	-1.795	-199.691	1217.799	-3.1992	1.1543	-0.25146
3.372	-8.839	3.5557	11.9249	0.13642	-0.067773	0.0040039	3.32971	5.7457	-19.7418	0.10352	0.061035	-0.050781	94.917	-41.316	1523.485	-2.5132	0.81885	-0.36377	-36.834	-217.634	1254.503	-3.4518	1.4798	-0.18662
3.374	-16.149	4.8352	14.619	0.11924	-0.05332	-0.0049805	36.684	-0.2844	17.1248	0.099219	0.065137	-0.053516	56.9318	-57.389	1567.512	-2.4355	0.75586	-0.36523	-49.99	-237.755	1295.976	-3.518	1.7285	-0.1625
3.376	-6.252	14.5496	-2.4029	0.11201	-0.0417	-0.0090821	-44.428	27.998	-7.2836	0.1001	0.068164	-0.058008	75.9178	-76.726	1549.59	-2.4038	0.71338	-0.35693	-37.387	-242.22	1341.34	-3.359	1.8641	-0.22266
3.378	-3.277	10.6449	13.55347	0.10498	-0.03125	-0.015625	4.533	-18.0462	3.406085	0.104	0.07207	-0.063477	69.6554	-49.18	1549.682	-2.3555	0.63184	-0.33984	-27.273	-295.56	1329.607	-3.0136	1.8641	-0.34687
3.38	-3.798	12.6452	28.402	0.10224	-0.019824	-0.024024	27.3382	-1.5352	7.2076	0.11201	0.077734	-0.066211	47.055	-1.09800000000001	1504.394	-2.3279	0.57153	-0.32739	-94.407	-335.75	1330.029	-2.5796	1.7856	-0.48389
3.382	-3.62	15.7833	12.2866	0.1002	-0.011425	-0.028027	-8.7257	12.7718	-15.7848	0.12451	0.085938	-0.069824	1.345	36.711	1481.907	-2.3042	0.5249	-0.31201	-124.616	-317.982	1334.177	-2.1482	1.6441	-0.60322
3.384	12.823	20.567	-2.997	0.1084	-0.0075196	-0.032715	23.5766	-30.05	19.0043	0.1293	0.082715	-0.075195	-26.905	77.359	1424.6787	-2.2827	0.48486	-0.29736	-134.91	-222.795	1345.18	-1.7968	1.4633	-0.69199
3.386	14.6042	17.2197	15.5011	0.11464	-0.0066406	-0.042188	-0.898	6.1941	-2.6188	0.13623	0.086035	-0.074023	-28.782	62.7752	1438.456	-2.2676	0.47412	-0.28906	-67.005	-111.22	1373.7999	-1.5516	1.2445	-0.75136
3.388	8.8	22.681	20.5689	0.12451	0.00048828	-0.048828	-24.4198	-5.6775	-22.782	0.13584	0.086817	-0.072852	-16.164	57.0851	1434.0223	-2.2324	0.46387	-0.27881	-56.577	-61.18	1379.6254	-1.403	1.0063	-0.77471
3.39	25.376	24.9035	18.38029	0.13056	-0.0041016	-0.051465	21.1085	-3.10269	-17.6566	0.13692	0.085449	-0.076074	-20.525	-0.893999999999998	1439.141	-2.196	0.46705	-0.27124	-56.8303	-60.16	1346.096	-1.3184	0.76367	-0.78027
3.392	29.187	35.506	-19.2576	0.14121	-0.0056641	-0.056055	19.2759	26.736	-17.7369	0.13965	0.080566	-0.073242	-19.219	19.193	1371.4715	-2.1597	0.4751	-0.26416	-61.374	-133.832	1361.845	-1.2923	0.54541	-0.754
3.394	7.606	23.1469	0.0999999999999996	0.15332	-0.00058594	-0.056445	8.325	-10.9709	-1.13337	0.1334	0.074707	-0.069531	-15.314	32.194	1365.182	-2.103	0.48486	-0.25	-77.5462	-158.1264	1435.427	-1.3082	0.36835	-0.72539
3.396	12.431	10.0778	30.864	0.15898	-0.0012695	-0.06377	13.284	-1.3601	-5.103278	0.13399	0.067285	-0.06416	16.192	114.709	1319.404	-2.082	0.48438	-0.24707	-75.442	-194.212	1494.504	-1.3742	0.25702	-0.68984
3.398	5.382	-1.2947	21.8946	0.17236	0.0019531	-0.068848	-5.193	23.197	-10.7859	0.12773	0.062988	-0.054395	32.892	104.611	1304.8532	-2.0327	0.47803	-0.2251	-94.131	-219.993	1515.922	-1.4942	0.22784	-0.64326
3.4	24.766	3.5101	15.24707	0.17744	0.0060547	-0.069824	14.7909	-6.2913	-8.092	0.12011	0.057617	-0.04707	49.427	113.432	1262.554	-2.0007	0.47241	-0.21728	-81.957	-245.496	1474.713	-1.6597	0.28564	-0.604
3.402	15.005	2.2651	15.0264	0.17705	0.0071289	-0.071484	20.5969	27.8323	11.0225	0.11426	0.047852	-0.04248	51.229	50.9698	1260.376	-1.9668	0.46777	-0.2041	-125.147	-298.015	1456.7779	-1.8675	0.40965	-0.58057
3.404	7.664	11.0932	11.9243	0.18448	0.013769	-0.077343	3.8822	19.1849	-7.4836	0.1085	0.044434	-0.034375	33.348	79.9886	1254.7258	-1.9194	0.46045	-0.18457	-96.037	-316.985	1476.872	-2.0909	0.57076	-0.58779
3.406	5.462	18.8467	7.6594	0.1915	0.016992	-0.073535	17.602	7.6189	-7.0225	0.099124	0.041797	-0.02832	55.0412	62.193	1265.525	-1.8979	0.45557	-0.18018	-56.6428	-257.262	1515.706	-2.294	0.74497	-0.61278
3.408	5.899	25.3705	5.0415	0.19385	0.017578	-0.075195	-13.9762	43.041	-10.401	0.090918	0.041406	-0.011914	60.8209	125.6567	1199.5352	-1.8394	0.4458	-0.15869	-24.4334	-178.406	1548.717	-2.4484	0.92594	-0.64316
3.41	3.299	20.4868	19.26243	0.19756	0.019434	-0.068164	6.8162	8.75024	0.1052	0.079199	0.035547	-0.012012	62.9968	91.567	1187.56927	-1.7917	0.43676	-0.14843	39.034	-110.6227	1564.439	-2.543	1.0977	-0.67285
3.412	-4.095	10.4071	19.468211	0.19922	0.02207	-0.065137	-2.558	13.3426	12.559	0.065918	0.037598	-0.0029297	56.392	128.1	1131.354	-1.7476	0.42627	-0.13721	62.766	-96.702	1531.126	-2.5501	1.2394	-0.7052
3.414	9.162	7.8111	15.8217	0.19883	0.029101	-0.063575	-10.3546	16.4307	0.8579	0.058789	0.039746	0.0036133	48.011	98.308	1090.337	-1.6816	0.42334	-0.12256	108.494	-105.155	1514.09	-2.4999	1.347	-0.74762
3.416	-13.269	21.5163	16.4315	0.19209	0.03623	-0.062109	29.2079	-16.12887	-13.2464	0.050879	0.044825	0.012793	53.70211	160.4355	1050.063	-1.6484	0.41992	-0.11523	126.2122	-69.277	1530.361	-2.4076	1.4142	-0.7976
3.418	-16.257	21.0261	20.7772	0.18994	0.047363	-0.055176	-1.3938	30.912	-13.9395	0.041894	0.050293	0.022168	92.91	159.981	1035.9003	-1.5781	0.42529	-0.095215	146.581	6.40000000000001	1547.4474	-2.2995	1.445	-0.84212
3.42	-21.306	16.1408	40.3269	0.18262	0.065527	-0.053125	-12.7431	16.1077	-1.3712	0.034961	0.059961	0.02207	81.465	223.753	1013.6812	-1.53	0.43286	-0.07959	104.373	44.293	1533.199	-2.1895	1.4414	-0.875
3.422	-25.6356	5.2738	53.838	0.17041	0.079589	-0.051172	9.642	0.89596	17.02523	0.030273	0.071777	0.020996	83.385	188.968	977.0646	-1.4766	0.43945	-0.071289	80.365	79.70581	1479.363	-2.108	1.4175	-0.89111
3.424	-20.89	-26.2705	89.712	0.16181	0.098343	-0.044141	-18.268	40.3614	19.3879	0.027441	0.086621	0.019043	54.5929	219.241	915.068	-1.416	0.45508	-0.039063	84.365	29.726	1415.05	-2.0555	1.3821	-0.88911
3.426	-3.736	-30.066	134.2867	0.15127	0.11318	-0.048926	-3.11345	-6.25	39.6987	0.025488	0.10059	0.01748	58.5871	193.324	892.773	-1.3843	0.46338	-0.031738	79.1417	-8.798	1427.176	-2.0473	1.342	-0.87622
3.428	-23.8879	-16.624	177.553	0.14307	0.13184	-0.048828	25.3243	-19.402	72.2285	0.018847	0.10918	0.009668	16.362	243.212	885.811	-1.3228	0.47314	-0.0097656	95.01	-43.358	1464.239	-2.0661	1.2941	-0.85478
3.43	-54.221	-5.505	229.0282	0.1333	0.15439	-0.047363	-15.6021	-31.669	84.5335	0.0049805	0.11846	-0.007324	5.4322	223.511	841.0923	-1.2751	0.47876	0.0043946	74.452	-80.268	1488.859	-2.1016	1.248	-0.83398
3.432	-47.8332	-26.166	307.4737	0.129	0.17403	-0.046875	-24.674	-73.8549	116.49	-0.018066	0.12646	-0.029785	-22.591	262.244	810.541	-1.2266	0.4834	0.016602	50.951	-86.457	1480.058	-2.1188	1.191	-0.81393
3.434	-83.691	-46.1443	349.807	0.12315	0.19395	-0.054297	-30.4628	-33.151	199.449	-0.047559	0.13877	-0.058789	-32.7738	222.85	769.038	-1.1519	0.48096	0.029785	57.894	-94.607	1475.164	-2.1176	1.1453	-0.79382
3.436	-87.2385	-64.6992	383.982	0.11553	0.20683	-0.063476	-46.16508	-51.1	321.823	-0.094239	0.15224	-0.082812	-83.78	234.466	726.643	-1.1167	0.47656	0.037598	70.685	-76.573	1499.947	-2.0908	1.0974	-0.77702
3.438	-66.4743	-59.9984	411.618	0.10645	0.22021	-0.080078	-13.263	-99.1745	508.393	-0.15948	0.17216	-0.10859	-72.577	175.765	675.9125	-1.0352	0.4668	0.04248	82.717	-45.548	1496.582	-2.0422	1.0629	-0.7621
3.44	-95.296	-49.9436	452.298	0.094728	0.23819	-0.10557	-80.8189	-89.6584	603.506	-0.24365	0.18721	-0.13438	-99.747	191.975	636.0899	-0.96948	0.45361	0.042724	38.4523	-18.679	1432.499	-1.978	1.0356	-0.74756
3.442	-94.076	-37.0526	463.426	0.075879	0.25771	-0.1291	-99.9567	-121.3786	658.64	-0.31689	0.20215	-0.13086	-56.55	186.576	595.677	-0.90137	0.43848	0.043457	-2.798	-3.528	1387.164	-1.8999	1.0188	-0.73639
3.444	-43.784	-22.1658	450.6385	0.053223	0.2874	-0.15644	-133.1854	-98.8635	716.885	-0.41123	0.19209	-0.11465	-57.842	209.228	594.87	-0.80469	0.4165	0.043457	-71.813	34.973	1355.5766	-1.8228	1.0075	-0.71914
3.446	-18.6138	-7.867	470.7561	0.0046876	0.31631	-0.19004	-79.3779	-85.772	789.038	-0.5667	0.18701	-0.10069	-59.278	190.541	551.583	-0.75781	0.40039	0.043457	-72.158	67.628	1348.277	-1.7408	1.0011	-0.70325
3.448	-67.276	-1.47499	534.1132	-0.057617	0.35352	-0.22705	11.38886	-113.9908	876.925	-0.77099	0.23272	-0.077246	-64.222	212.311	522.147	-0.67188	0.36816	0.040039	-38.93367	95.417	1323.474	-1.6621	0.9958	-0.68238
3.45	-52.066	11.892	588.315	-0.12744	0.39697	-0.24903	7.32400000000001	-89.132	859.798	-0.98759	0.28574	-0.02959	-31.2233	187.504	472.656	-0.60132	0.34936	0.042724	-34.9485	108.382	1254.042	-1.5854	0.98682	-0.66113
3.452	-16.5617	38.865	598.8153	-0.2126	0.44267	-0.26504	39.113	-74.362	841.431	-1.231	0.33691	0.039551	-65.8347	198.333	459.395	-0.5415	0.3252	0.039063	-54.3115	89.187	1181.8602	-1.5163	0.9776	-0.6362
3.454	-23.7316	55.3085	620.668	-0.31533	0.4919	-0.28066	65.407	-84.04	873.559	-1.4925	0.40176	0.10674	-74.774	184.156	409.5771	-0.45898	0.29297	0.040527	-92.869	127.378	1132.699	-1.4501	0.96556	-0.61287
3.456	-21.3185	45.455	682.4638	-0.42627	0.54258	-0.28887	3.23399999999999	-35.952	873.008	-1.7715	0.46797	0.16504	-74.097	184.182	389.466	-0.42871	0.28027	0.04834	-107.005	162.82302	1104.005	-1.3883	0.95618	-0.5853
3.458	-23.9091	19.55	731.092	-0.54639	0.6001	-0.29248	26.615	-60.8834	887.2078	-2.0402	0.55469	0.20136	-11.3578	166.116	352.0328	-0.36475	0.24658	0.046875	-64.242	200.326	1084.395	-1.3343	0.94437	-0.55851
3.46	-49.6181	13.292	741.2059	-0.66836	0.65528	-0.30195	134.348	-89.527	862.9293	-2.3182	0.63515	0.18935	-22.7883	144.206	325.3341	-0.32935	0.2212	0.051269	-12.053	191.228	1064.321	-1.2827	0.93604	-0.52686
3.462	-68.313	4.059	755.327	-0.77735	0.71719	-0.30821	63.8811	-127.3395	896.084	-2.583	0.73633	0.14746	-13.9571	123.964	271.62	-0.29736	0.1958	0.052734	-8.1347	160.944	1037.629	-1.2432	0.92658	-0.49743
3.464	-16.7226	-41.625	780.67344	-0.8793	0.78008	-0.31524	-4.449	-179.238	933.975	-2.7943	0.87344	0.055468	-32.215	120.541	255.059	-0.26025	0.16357	0.062012	4.6964	178.128	1016.054	-1.2057	0.91248	-0.45718
3.466	4.6	-69.6134	807.634	-0.96846	0.84287	-0.32549	7.898	-136.999	967.4066	-2.8792	1.0532	-0.040625	26.2696	139.847	223.487	-0.25098	0.14648	0.063477	0.4349	205.714	1003.886	-1.1706	0.89828	-0.4336
3.468	22.72	-100.699	823.9378	-1.0474	0.91064	-0.34473	56.1142	-118.676	949.701	-2.7683	1.1876	-0.076562	30.0343	138.6463	230.581	-0.22168	0.11328	0.068848	-1.22309	231.708	1021.5692	-1.1285	0.87882	-0.40434
3.47	26.797	-125.917	834.5055	-1.1047	0.97071	-0.3502	130.551	-155.724	959.605	-2.5438	1.2413	-0.07793	70.781	129.979	206.13216	-0.20727	0.090088	0.077148	18.9114	228.798	1025.86	-1.0835	0.85498	-0.37256
3.472	19.293	-144.85	864.221	-1.1551	1.0343	-0.35791	99.608	-155.143	984.608	-2.2729	1.2583	-0.08252	39.757	99.078	183.9842	-0.19531	0.070313	0.088379	52.175	185.012	963.426	-1.0331	0.82764	-0.34468
3.474	12.74	-150.929	922.5752	-1.1914	1.0887	-0.36924	81.749	-215.223	1010.408	-2.0445	1.2277	-0.12344	43.947	107.937	136.24	-0.18604	0.046387	0.099121	65.891	150.098	864.46	-0.97438	0.80082	-0.32058
3.476	9.64	-147.1106	956.6889	-1.2113	1.1375	-0.38056	91.841	-236.419	1072.5236	-1.8823	1.1806	-0.17451	11.6677	98.069	125.931	-0.18018	0.031738	0.10742	49.739	161.103	798.6814	-0.90275	0.77392	-0.29553
3.478	17.2953	-151.279	992.036	-1.2202	1.1606	-0.39209	101.293	-224.3026	1140.349	-1.787	1.1212	-0.22646	3.789	117.623	97.097	-0.17822	0.010742	0.12451	16.8252	191.588	756.95	-0.83144	0.7493	-0.27803
3.48	8.6897	-142.2914	1020.481	-1.2282	1.163	-0.41182	68.977902	-296.454	1214.221	-1.7389	1.0547	-0.2625	-10.354	109.58251	111.9925	-0.17798	-0.00097655	0.1377	7.0581	206.2492	731.099	-0.75049	0.72412	-0.25244
3.482	3.5897	-123.363	1039.844	-1.2371	1.1504	-0.42099	23.648	-307.429	1270.052	-1.7202	0.97705	-0.28516	16.2078	128.554	79.71085	-0.17627	-0.0053711	0.14307	31.2116	222.93	681.158	-0.66769	0.69601	-0.22914
3.484	-22.5393	-100.85	1055.0631	-1.2469	1.1352	-0.4206	3.3923	-313.775	1258.0048	-1.7256	0.90391	-0.28379	11.524	80.9136	36.674	-0.18408	-0.0048828	0.15137	46.888	194.912	638.08076	-0.58709	0.66988	-0.21017
3.486	-19.8153	-85.323	1077.9967	-1.2466	1.1085	-0.42295	-1.8498	-332.606	1288.006	-1.759	0.8334	-0.26543	-3.324	82.083	21.914	-0.18408	-0.0097656	0.15576	37.9593	229.76	622.074	-0.51099	0.63907	-0.1887
3.488	-11.303	-61.94	1088.3034	-1.2285	1.0625	-0.41406	-27.333	-213.8785	1305.247	-1.8137	0.76777	-0.2373	-43.35725	34.0587	22.2417	-0.16455	-0.020508	0.17285	27.8757	244.362	613.224	-0.44258	0.60727	-0.16412
3.49	7.173	-49.578	1099.106	-1.1933	0.99952	-0.40019	-22.91474	-156.8	1330.923	-1.9093	0.71377	-0.19912	-34.3668	55.498	9.294	-0.15113	-0.031738	0.18384	2.5252	290.378	580.894	-0.37646	0.58057	-0.1416
3.492	-6.036	-61.251	1111.7655	-1.1531	0.92226	-0.39493	-7.4849	-125.45	1395.3788	-2.0269	0.68408	-0.16504	-31.962	33.2088	25.2691	-0.12988	-0.04248	0.19531	-18.2262	270.333	516.432	-0.3267	0.54407	-0.12258
3.494	0.843	-71.21	1138.4056	-1.1086	0.84023	-0.38398	-21	-67.181	1399.244	-2.158	0.67246	-0.13467	-19.639	51.8156	12.4053	-0.11572	-0.050781	0.19873	-85.387	206.6113	455.7796	-0.2771	0.51371	-0.097782
3.496	-0.956	-83.772	1166.6653	-1.0745	0.7665	-0.38799	16.835	-121.342	1399.2064	-2.2936	0.67959	-0.11777	-41.9056	11.8515	12.57941	-0.10889	-0.054199	0.19385	-81.279	174.746	396.2441	-0.24192	0.47933	-0.077457
3.498	1.411	-87.671	1178.858	-1.0425	0.70752	-0.39355	5.271	-96.815	1435.2124	-2.4171	0.70303	-0.11308	-43.647	31.858	25.8294	-0.091309	-0.064453	0.18604	-93.315	136.401	368.475	-0.21651	0.4503	-0.059482
3.5	-42.3932	-100.173	1220.8897	-1.0275	0.67002	-0.40283	-15.7621	-38.001	1442.225	-2.5262	0.72764	-0.12139	-62.144	10.6726	14.7126	-0.078369	-0.063232	0.18799	-114.002	148.184	342.8999	-0.2002	0.41895	-0.042969
3.502	-33.6117	-110.8967	1263.888	-1.021	0.65635	-0.42197	-16.861	-75.744	1465.436	-2.6094	0.76172	-0.12744	-51.781	52.2021	21.680703	-0.067871	-0.063965	0.1875	-155.681	142.596	307.794	-0.18857	0.38867	-0.025973
3.504	-20.3265	-111.9656	1288.418	-1.0378	0.66923	-0.44814	-58.808	-46.624	1475.883	-2.6737	0.81201	-0.13721	-37.3824	8.38776	16.969	-0.056641	-0.06543	0.18311	-146.535	135.0655	257.491	-0.18643	0.36415	-0.0096634
3.506	2.526	-100.4168	1284.085	-1.0807	0.70839	-0.46855	-80.275	-79.063	1462.277	-2.7293	0.86289	-0.14707	-24.645	23.2339	25.2317	-0.044677	-0.075684	0.18018	-122.536	118.2171	213.703	-0.19268	0.34501	0.0067421
3.508	-21.526	-99.4792	1273.6059	-1.1367	0.77051	-0.50049	-23.696	-152.868	1539.245	-2.7734	0.92188	-0.15644	-15.836	-15.8851	19.0531	-0.036133	-0.081055	0.17969	-83.497	127.276	198.716	-0.21045	0.32998	0.025686
3.51	-14.3433	-86.0669	1301.4566	-1.2103	0.84369	-0.52824	-17.4506	-107.2572	1562.023	-2.8119	0.98496	-0.17862	-27.1912	17.9553	8.25268	-0.020996	-0.09082	0.1792	-63.691	137.5503	196.5189	-0.2373	0.31934	0.047363
3.512	0.129999999999999	-77.15912	1304.115	-1.2809	0.92662	-0.55314	1.663	-150.024	1558.777	-2.8477	1.0469	-0.19531	-6.007	-5.6006	21.0073	-0.01123	-0.096191	0.18896	-55.862	148.0434	173.743	-0.26494	0.31572	0.062792
3.514	-15.668	-61.921	1323.599	-1.3458	1.0001	-0.58168	1.067	-152.874	1594.975	-2.8616	1.1099	-0.2167	2.1	27.388	29.0896	0.0043945	-0.11084	0.18994	-70.121	167.35	116.6803	-0.29893	0.31348	0.073339
3.516	-22.2229	-60.734	1333.71	-1.4009	1.0762	-0.60559	-25.977	-124.392	1567.233	-2.8766	1.1578	-0.23565	29.324	-3.6355	25.5377	0.02124	-0.12134	0.19384	-74.405	143.957	82.093	-0.33526	0.31309	0.092089
3.518	-3.7817	-69.7703	1338.474	-1.4375	1.1445	-0.64063	13.052	-178.843	1579.495	-2.8797	1.2	-0.24658	40.9536	35.475	23.65401	0.039551	-0.1377	0.18994	-72.495	166.593	78.529	-0.36484	0.31133	0.096191
3.52	-4.4649	-53.525	1336.8538	-1.4658	1.1774	-0.6631	69.6255	-100.5504	1573.006	-2.8768	1.2263	-0.24541	56.306548	0.709499999999999	-6.8464	0.067871	-0.16309	0.18555	-31.0631	125.362	80.799	-0.39404	0.31641	0.10645
3.522	-37.038	-26.683	1312.936	-1.5226	1.217	-0.69992	41.7246	-63.546	1527.216	-2.8687	1.2407	-0.24072	58.6208	23.4666	13.79	0.08252	-0.17627	0.18457	-7.41	107.838	64.3387	-0.41504	0.32383	0.11015
3.524	-41.329	-11.3238	1315.962	-1.5913	1.2669	-0.72645	23.1182	-82.58224	1553.7428	-2.8629	1.2441	-0.23086	44.964	-24.59828	16.7109	0.12012	-0.20215	0.15576	23.24242	87.2139	17.4349	-0.42344	0.33496	0.1164
3.526	-15.4233	6.4031	1325.3241	-1.6659	1.3289	-0.75284	-2.566	3.602	1549.3067	-2.8581	1.2417	-0.2166	22.8346	3.049	4.017	0.14844	-0.22949	0.13135	42.559	39.12	9.6561	-0.42305	0.34004	0.11836
3.528	-10.0679	8.79803	1332.9825	-1.748	1.4004	-0.78027	-14.456	-20.9342	1522.4593	-2.8534	1.2355	-0.20019	52.5289	-13.6917	-7.4995	0.17432	-0.25146	0.1084	52.727	33.863	-2.835	-0.41963	0.33935	0.12783
3.53	-7.658	-5.028	1327.9012	-1.8254	1.476	-0.80374	32.1135	-5.43026	1531.5894	-2.8507	1.2294	-0.18711	57.772	20.906	17.4412	0.22705	-0.27295	0.081543	69.838	-1.45	-0.734000000000002	-0.40918	0.33008	0.12939
3.532	-17.265	-40.9765	1349.673	-1.8996	1.5537	-0.83156	32.706	40.322	1496.5034	-2.8413	1.2212	-0.17139	49.6741	4.388	2.643	0.25586	-0.28516	0.066406	83.987	-15.9701	15.0726	-0.39004	0.31641	0.13184
3.534	-11.2049	-49.4421	1367.287	-1.9619	1.6341	-0.86106	8.266	-22.1814	1475.03	-2.8271	1.2103	-0.15781	13.98	15.4966	13.294	0.33057	-0.30371	0.04541	99.27	-30.7884	13.0665	-0.37256	0.29346	0.12676
3.536	-6.1641	-39.668	1382.008	-2.0151	1.7043	-0.89344	-3.2	14.7474	1455.7673	-2.8086	1.1918	-0.14053	2.499	5.745	-26.955	0.37745	-0.31568	0.022216	97.39	-7.4427	36.035	-0.35459	0.26689	0.12402
3.538	-15.3403	-36.9366	1349.6052	-2.0527	1.7715	-0.92578	-31.318	15.6175	1429.404	-2.7793	1.1742	-0.13115	-11.544	11.1017	-17.7911	0.40332	-0.32275	-0.0043945	92.22	10.93	54.318	-0.33623	0.23652	0.1207
3.54	-8.8163	-32.3756	1335.8262	-2.0778	1.8196	-0.95049	-14.409	-46.2087	1491.218	-2.7501	1.146	-0.12314	11.857	-2.707	-9.37043	0.41797	-0.31934	-0.040527	52.009	16.8504	70.901	-0.32178	0.20752	0.12354
3.542	-8.585	-15.80269	1332.0233	-2.084	1.8594	-0.97052	9.5195	-4.134	1493.2103	-2.7124	1.1147	-0.11816	4.933	-15.4136	11.7449	0.42139	-0.30957	-0.053223	41.694	4.847	55.9343	-0.30986	0.19014	0.11396
3.544	-15.8661	-23.4208	1337.2196	-2.0767	1.8831	-0.98623	-6.8963	-54.961	1449.712	-2.6726	1.093	-0.10791	-10.681	13.0022	-18.24885	0.41504	-0.27979	-0.084473	8.906	-26.71412	36.075	-0.30196	0.17588	0.11455
3.546	-41.0624	-26.488	1344.7594	-2.0647	1.8931	-0.98975	-22.1909	-32.462	1482.042	-2.6289	1.0676	-0.1042	-16.816	33.56	4.63138	0.41162	-0.25293	-0.094483	14.374	-1.147	1.725	-0.29375	0.14268	0.12901
3.548	-33.0485	-19.3509	1339.5631	-2.0366	1.8892	-0.98584	-71.466	42.58	1424.5858	-2.5832	1.0468	-0.097559	-43.6452	39.9826	-14.197	0.41211	-0.23145	-0.098633	1.011	-6.948	-6.183	-0.27646	0.11455	0.1502
3.55	-35.632	5.1747	1334.471	-1.9974	1.8655	-0.97184	-65.416	-4.577	1435.948	-2.5317	1.0269	-0.09541	-73.018	35.378	18.3511	0.40527	-0.19482	-0.10352	-9.0201	32.367	-4.294	-0.25342	0.08252	0.17285
3.552	-31.8249	26.8254	1316.4784	-1.9591	1.8308	-0.95109	-41.961	52.1677	1430.995	-2.4844	0.99902	-0.09082	-48.06241	38.78063	-3.99	0.40381	-0.17871	-0.10352	-25.4391	-0.4933	-14.4223	-0.22715	0.053027	0.19844
3.554	-49.1	46.444	1300.1566	-1.9232	1.7828	-0.9328	-43.0933	29.973	1365.7077	-2.4324	0.97422	-0.089844	-45.272929	17.0012	-4.21	0.38281	-0.14941	-0.095703	-64.398	-2.1561	-7.5562	-0.19687	0.023633	0.21387
3.556	-33.75085	67.047	1289.8389	-1.8918	1.7346	-0.91295	-35.1794	-17.983	1383.361	-2.3854	0.94424	-0.085547	-29.0776	35.34	-6.149	0.36011	-0.12427	-0.092285	-63.993	-2.462	-31.564	-0.15938	0.0029296	0.22989
3.558	-21.4027	69.375	1280.036	-1.8628	1.688	-0.89404	-58.104	75.36584	1343.242	-2.3401	0.9208	-0.083203	-54.766	11.0885	24.457	0.32813	-0.099609	-0.083496	-54.992	-3.8982	-5.8882	-0.10986	-0.020508	0.23594
3.56	-39.711	49.141	1278.864	-1.8461	1.6406	-0.8754	-58.61	70.806	1275.313	-2.2896	0.89092	-0.075879	-48.1564	31.047	11.1498	0.29395	-0.070801	-0.075684	-29.9983	30.911	-2.9311	-0.048828	-0.044922	0.23877
3.562	-58.798	39.599	1289.4501	-1.8292	1.6028	-0.86053	-19.3256	105.746	1285.71	-2.2383	0.87207	-0.070801	-30.153	10.1554	8.0425	0.27344	-0.058594	-0.074707	-80.288	15.8992	-1.6581	0.028418	-0.071778	0.23838
3.564	-32.297	26.8858	1280.5195	-1.8082	1.5729	-0.8452	-19.3875	151.163	1221.978	-2.1826	0.84531	-0.064063	-6.915	42.34489	-6.571	0.23633	-0.029297	-0.0625	-59.29	-3.0924	-18.7582	0.11465	-0.1002	0.23203
3.566	-14.8014	36.03228	1274.391	-1.7955	1.5456	-0.83235	-24.1839	64.4563	1186.548	-2.1265	0.8208	-0.059278	10.48	19.6037	32.0839	0.21728	-0.0026854	-0.057861	-64.588	-25.7898	-26.0318	0.2166	-0.14043	0.21211
3.568	-31.3662	28.8116	1247.77733	-1.7808	1.5278	-0.81885	26.7383	100.587	1214.44	-2.0651	0.79776	-0.056934	49.7148	44.215	44.428	0.2002	0.016602	-0.05127	-77.634	-0.6871	-2.5341	0.31514	-0.18633	0.19297
3.57	-43.397	18.771	1237.818256	-1.7637	1.5084	-0.80807	7.6287	110.2937	1190.9655	-2.0018	0.77861	-0.053516	20.0177	-7.767	41.961	0.17285	0.033691	-0.036621	-14.6082	18.9783	9.3229	0.42676	-0.2251	0.17139
3.572	-36.598	23.9358	1207.72456	-1.7542	1.4901	-0.80165	1.7173	89.242	1193.9537	-1.9375	0.75391	-0.051758	10.92	23.3252	21.0125	0.14941	0.044922	-0.034668	-16.4107	32.8209	6.89745	0.58564	-0.30244	0.17705
3.574	-29.478	38.3862	1179.2105	-1.7377	1.4775	-0.79273	16.3558	155.613	1165.5926	-1.8689	0.73262	-0.046973	8.709	-29.566	18.88776	0.10303	0.070801	-0.031738	7.891	25.513	2.56816	0.68916	-0.38398	0.14336
3.576	-29.3249	56.9977	1184.31	-1.7193	1.4657	-0.78015	-7.9665	92.787	1088.257	-1.8051	0.7086	-0.051562	62.474	17.0578	11.1161	0.06958	0.096192	-0.033692	23.8724	10.3452	10.0369	0.71963	-0.44375	0.078515
3.578	-21.7993	54.3672	1192.379	-1.6968	1.4536	-0.77295	10.904	87.217	1084.8554	-1.7348	0.68516	-0.058985	49.3724	-20.9254	26.2518	0.040039	0.12061	-0.034668	44.736	8.7727	6.533	0.68232	-0.46309	0.00918
3.58	-2.2995	62.3047	1167.569	-1.6754	1.4403	-0.75963	47.286	126.1712	1049.49	-1.6605	0.66397	-0.067676	44.8251	34.0896	1.2618	0.010742	0.15088	-0.027344	13.06625	-10.6239	6.98	0.62891	-0.43164	-0.051758
3.582	-6.73	74.864	1133.1911	-1.6539	1.4218	-0.75859	33.401	67.556	1047.0338	-1.584	0.64063	-0.073242	32.767	-5.359	7.555	-0.0039063	0.16406	-0.021484	87.56	20.6236	-7.715	0.62646	-0.3789	-0.084375
3.584	-17.1247	78.805	1105.635	-1.6382	1.3992	-0.75309	35.123	135.65	1038.867	-1.5008	0.61485	-0.075098	41.9896	36.1608	18.8797	-0.025391	0.18066	-0.016602	106.694	24.4442	0.0175999999999998	0.65195	-0.33125	-0.10722
3.586	-21.4453	86.548	1108.8331	-1.615	1.3873	-0.74138	20.0959	130.404	975.861	-1.4241	0.59033	-0.075293	41.4852	-24.31	29.061	-0.042481	0.19898	-0.0043945	59.595	37.363	9.7848	0.69453	-0.29766	-0.12558
3.588	-11.0298	110.06	1089.7904	-1.5913	1.3735	-0.72949	18.3297	94.092	939.369	-1.353	0.5622	-0.07959	24.876	23.0231	8.164	-0.064453	0.20898	-0.00048828	71.288	46.654	4.9342	0.72197	-0.26387	-0.13848
3.59	-7.16906	115.703	1039.7172	-1.5511	1.3517	-0.71008	25.1311	185.003	902.9128	-1.2822	0.53662	-0.079297	18.353	-22.7765	-15.6797	-0.084473	0.22754	0.0097656	84.634	31.137	16.3266	0.73145	-0.21875	-0.16064
3.592	-17.8038	96.661	1023.8948	-1.5069	1.3328	-0.69612	31.8457	156.574	877.22939	-1.2178	0.51172	-0.084473	23.563	33.766	-16.0605	-0.097168	0.23291	0.01416	50.675	23.7365	29.0497	0.71289	-0.16885	-0.17373
3.594	-19.4357	94.2459	1005.0715	-1.4744	1.3075	-0.67775	32.860269	167.587	875.121	-1.1612	0.48369	-0.087012	9.652	-7.928977	0.5154	-0.12256	0.24072	0.03125	52.199	1.9125	33.2525	0.67617	-0.10742	-0.18799
3.596	-34.8819	94.0006	1003.3813	-1.4428	1.2873	-0.66123	3.3911	200.548	814.8129	-1.103	0.45889	-0.081738	-22.154	24.4365	6.144	-0.14356	0.24903	0.038086	52.731	-6.2263	29.875	0.62773	-0.046485	-0.19815
3.598	-22.6997	101.622	972.3126	-1.4146	1.2642	-0.64502	-9.7021	115.864	778.4635	-1.037	0.42177	-0.073535	-40.2983	-9.607	-15.675	-0.16504	0.25488	0.048828	33.9786	-15.25424	23.13544	0.5751	0.012988	-0.20645
3.6	-21.1668	93.2486	963.9647	-1.3785	1.2371	-0.63222	-15.4033	171.093	741.7982	-0.97432	0.38584	-0.072852	-33.402	31.4044	-6.987	-0.19287	0.25195	0.059082	14.379	-16.5951	28.0326	0.5249	0.06543	-0.2002
3.602	-16.6939	94.417	964.124	-1.3366	1.2024	-0.61708	-25.698	176.634	704.5285	-0.91357	0.3501	-0.068359	-26.949908	-11.0475	-8.986	-0.2002	0.25098	0.067383	4.033	-19.7048	14.764644	0.4791	0.10527	-0.18955
3.604	-22.0165	98.0593	932.382	-1.2944	1.1634	-0.59833	7.427	135.683	690.9069	-0.85449	0.31895	-0.070019	-30.6376	23.744	8.756	-0.22217	0.24854	0.080078	-38.905	-26.86069	-4.2443	0.4374	0.14365	-0.18174
3.606	-15.833	96.438	910.8082	-1.2381	1.1201	-0.57246	4.667	200.966	651.3914	-0.80283	0.29326	-0.07539	-42.1864	2.5229	-10.8089	-0.23193	0.24317	0.08667	-10.7531	-7.126	-15.203111	0.3917	0.16592	-0.15908
3.608	-13.451	107.151	898.5704	-1.1943	1.0723	-0.55469	-33.259	132.187	606.6803	-0.75166	0.27217	-0.070703	-43.2379	30.904	-24.3751	-0.23877	0.23828	0.091309	-45.8	-15.1196	8.331	0.31182	0.19981	-0.14873
3.61	-13.772	110.818	868.81608	-1.1494	1.0332	-0.53603	-5.8321	126.349	616.453	-0.69492	0.24951	-0.068945	-33.2345	1.633	-16.2486	-0.24805	0.23096	0.091309	-55.302	7.9532	13.7191	0.22314	0.24805	-0.14209
3.612	-9.762	120.183	841.873	-1.1019	0.99649	-0.51807	-2.5555	150.785	584.405	-0.64209	0.22217	-0.05957	-33.809	27.9357	0.5304	-0.24072	0.22314	0.088867	-33.6803	-11.0657	15.8074	0.13467	0.29932	-0.1292
3.614	-5.607	108.811	813.0625	-1.0606	0.96524	-0.50479	-10.424	90.8709	546.37735	-0.59609	0.2041	-0.062695	-32.1	18.2944	6.642	-0.24121	0.21484	0.077148	-50.4785	12.1689	-5.2499	0.056933	0.35469	-0.1084
3.616	-0.962999999999997	101.5076	812.555	-1.0151	0.94287	-0.50029	20.131	151.632	510.95	-0.55742	0.18672	-0.059766	-7.715	35.7491	45.928	-0.23803	0.20703	0.063721	-77.067	1.4983	-21.0484	-0.011035	0.41015	-0.086915
3.618	-19.186	107.67197	790.572	-0.9707	0.91797	-0.48926	25.9311	138.387	445.3286	-0.51719	0.17578	-0.051563	-11.441	4.92	60.1798	-0.2334	0.19629	0.041992	-92.757	7.7283	-12.522	-0.069043	0.45615	-0.051465
3.62	-17.801	117.5434	744.3494	-0.92656	0.90762	-0.47637	8.373	100.568	440.9296	-0.47461	0.15918	-0.041699	-9.476	-16.356	106.895	-0.2251	0.17871	0.0058594	-57.248	28.666	-4.06181	-0.11963	0.49268	-0.01709
3.622	-4.21	122.95	702.7997	-0.88897	0.88916	-0.47022	33.6729	147.172	433.372	-0.43115	0.1333	-0.03418	-12.3035	-34.263	119.52434	-0.22363	0.18213	-0.02002	-47.4413	33.353	-1.519	-0.16787	0.51475	0.01377
3.624	0.742999999999999	118.7616	702.432	-0.8581	0.86611	-0.4624	27.6049	78.316	396.043	-0.39248	0.11631	-0.033789	-26.85793	-31.077	143.149	-0.22607	0.18359	-0.035156	-2.2342	44.06	-10.360963	-0.21357	0.53135	0.043652
3.626	9.795	119.4097	680.269	-0.82803	0.84365	-0.45166	37.1981	109.242	366.8113	-0.35449	0.09209	-0.022754	12.116	-19.229	179.6201	-0.2461	0.18897	-0.064697	-7.9353	16.0431	-21.0202	-0.24912	0.53564	0.070606
3.628	15.915	133.759	650.734	-0.80273	0.82031	-0.43896	58.743	136.6519	323.7046	-0.32285	0.070996	-0.019239	19.9378	-20.2411	251.713	-0.27734	0.19727	-0.080566	-13.59637	6.1555	-23.2652	-0.28447	0.52647	0.090039
3.63	23.13	132.369	627.2166	-0.77754	0.79707	-0.42207	33.2038	78.006	281.9032	-0.28594	0.048535	-0.0099608	2.219	-2.087	351.2856	-0.34424	0.20557	-0.10205	9.702	6.0512	-0.00850000000000062	-0.30859	0.51563	0.11279
3.632	9.928	128.541	615.6502	-0.75352	0.76543	-0.40742	36.498	142.874	259.24	-0.25537	0.028809	0	-30.5031	2.027	489.0848	-0.3833	0.20605	-0.10986	35.1619	12.1714	16.7955	-0.31993	0.49238	0.12393
3.634	11.065	119.328	589.7256	-0.72734	0.73379	-0.39219	58.6356	109.3637	233.679	-0.22227	0.010156	0.0047851	-43.3708	10.40035	600.113	-0.48145	0.20117	-0.12842	77.456	16.21518	23.5301	-0.32022	0.47061	0.12695
3.636	-4.328	120.0885	553.48017	-0.69873	0.70273	-0.37109	60.5521	70.102	230.188	-0.1961	-0.015332	0.0080078	-85.437	-17.3047	709.7659	-0.57715	0.18506	-0.12866	64.124	3.8858	7.7686	-0.30537	0.4417	0.12969
3.638	14.76	122.492	541.957	-0.66797	0.67285	-0.35449	57.542	126.71	216.113	-0.17695	-0.038769	0.014648	-77.8614	-23.168	809.2682	-0.69629	0.17432	-0.12646	68.85	7.11216	20.6155	-0.27256	0.41201	0.12607
3.64	35.853	117.079	526.99	-0.63916	0.63271	-0.34434	47.49	74.832	207.726	-0.15508	-0.058203	0.020703	-117.8535	-87.469	915.096	-0.90381	0.15869	-0.11182	37.43259	17.155	32.047	-0.23096	0.36963	0.11133
3.642	3.048	107.4393	510.098	-0.60742	0.59492	-0.32773	39.936	113.4544	200.83075	-0.1333	-0.079102	0.026367	-91.044	-72.316	993.435	-1.0293	0.16016	-0.1084	54.713	31.4116	44.067	-0.17158	0.33086	0.091603
3.644	-3.719	107.4137	470.1451	-0.57031	0.57109	-0.31329	63.8273	144.073	163.9187	-0.12373	-0.09336	0.026758	-69.906	-116.0666	1029.737	-1.2935	0.18506	-0.077637	77.708	24.4911	32.636	-0.1082	0.292	0.069922
3.646	7.774	97.3928	439.7437	-0.53858	0.53916	-0.3042	30.228	60.28	156.649	-0.11533	-0.098438	0.028516	-44.3008	-81.395	1024.666	-1.5776	0.24023	-0.024902	68.637	6.5736	0.592843	-0.043359	0.25215	0.03789
3.648	7.962	96.0605	429.0396	-0.51172	0.50879	-0.29688	8.635	88.4016	139.05424	-0.10478	-0.11211	0.021094	-18.936	-160.886	1034.925	-1.73	0.27393	0.0063477	64.33	-13.181	5.4289	0.029688	0.21309	0.0019532
3.65	4.762	104.6425	410.6573	-0.4831	0.48545	-0.28681	4.8021	60.2469	113.2844	-0.083008	-0.11719	0.018848	36.824	-144.21	1010.29571	-2.0581	0.35596	0.079102	38.1324	-9.76335	19.5851	0.091797	0.17139	-0.041504
3.652	6.886	105.9747	379.4921	-0.45693	0.46181	-0.27627	9.48	34.08	108.81536	-0.061035	-0.12451	0.022949	43.692	-200.37	1053.33	-2.2957	0.43042	0.125	20.1861	16.54937	50.7299	0.1499	0.12949	-0.091894
3.654	21.814	113.804	372.4344	-0.43193	0.44073	-0.26416	1.718	98.3	113.928	-0.029785	-0.13164	0.023438	33.222	-149.431	1094.5458	-2.4976	0.51025	0.14941	13.1256	-16.4814	67.0564	0.19004	0.089648	-0.15107
3.656	3.171	109.792	353.3927	-0.40225	0.41318	-0.25313	-1.945	44.0353	92.8838	-0.011719	-0.14268	0.019043	17.456	-233.77	1111.9466	-2.6167	0.64111	0.17334	26.1772	-28.933	89.213	0.2084	0.045899	-0.21084
3.658	2.294	108.549	333.7292	-0.37402	0.38379	-0.24756	-1.721	55.7206	92.2124	0.0039062	-0.14424	0.0081054	-2.472	-218.431	1087.0623	-2.6187	0.70752	0.17188	-33.8064	-21.5244	147.152	0.19668	0.014746	-0.27978
3.66	-6.777	97.5899	326.8838	-0.34844	0.35293	-0.23935	-13.064	87.205	47.101	0.030957	-0.14853	0.0043945	-4.408	-290.447	1073.0042	-2.5308	0.81885	0.14063	-72.863	20.7203	276.8438	0.15479	0.0019531	-0.35059
3.662	3.19	100.932	314.06052	-0.31963	0.32139	-0.23145	-23.786	47.3689	50.63	0.049316	-0.15527	-0.00097656	5.616	-205.186	1092.41	-2.4577	0.89038	0.088377	-82.319	44.6498	443.6037	0.078321	0.016211	-0.40117
3.664	9.956	97.2691	287.0687	-0.29775	0.29013	-0.21817	-3.3169	82.579	71.122	0.06582	-0.15156	-0.0048828	42.516	-215.917	1189.0071	-2.3745	0.95361	0.032227	-135.895	-15.3672	573.093	-0.033496	0.057129	-0.44287
3.666	1.579	95.4759	253.53612	-0.27471	0.26416	-0.21064	-7.1154	38.6951	65.034	0.078125	-0.15703	-0.003125	56.963	-105.33	1203.34	-2.2715	1.0039	-0.023926	-153.73	-59.8701	721.221	-0.17295	0.10713	-0.48076
3.668	-0.939	85.8666	247.07691	-0.2583	0.23193	-0.20215	-11.779	18.7999	46.4237	0.086328	-0.15351	-0.0074219	68.4985	-152.493	1228.221	-2.2202	1.0151	-0.041504	-201.415	-98.625	853.946	-0.32236	0.16914	-0.50146
3.67	6.274	84.5679	257.371	-0.2456	0.2085	-0.1876	-15.0202	65.707	19.7204	0.096289	-0.15371	-0.0088867	103.94	-134.508	1239.691	-2.1362	1.0005	-0.056641	-212.622	-84.959	987.9501	-0.48486	0.24365	-0.51855
3.672	20.197	78.633	235.4319	-0.23096	0.17949	-0.17392	-8.2766	25.809	11.9652	0.10449	-0.15186	-0.0073242	99.872	-248.19	1276.734	-2.1055	0.95898	-0.049561	-194.602	-70.23	1091.64	-0.65293	0.33047	-0.51582
3.674	7.329	76.86	204.4866	-0.21768	0.15801	-0.16572	-7.79	41.17	43.6939	0.11143	-0.15537	-0.0010742	104.3235	-211.513	1332.0664	-2.105	0.90088	-0.047363	-94.988	-54.148	1153.494	-0.84356	0.42773	-0.48379
3.676	2.065	68.2123	209.0622	-0.20879	0.13574	-0.15156	-8.8457	47.673	26.1863	0.11318	-0.15322	0.0010742	95.227	-242.712	1383.048	-2.1636	0.82275	-0.025391	-30.489	-102.145	1202.669	-1.1557	0.50704	-0.38418
3.678	5.394	69.9093	210.0606	-0.19922	0.12158	-0.14209	23.66598	2.501	22.692	0.11006	-0.15401	0.0057615	61.93	-186.919	1392.919	-2.2183	0.79346	-0.0053711	29.753	-110.8805	1232.1774	-1.643	0.59648	-0.30234
3.68	26.278	77.8964	197.8236	-0.19111	0.10674	-0.13477	45.786	34.821	22.5886	0.11279	-0.15274	0.0098632	11.5412	-261.475	1431.014	-2.3491	0.74268	0.021484	65.169	-115.159	1287.2548	-2.2515	0.73291	-0.29053
3.682	-8.959	78.228	164.9459	-0.18203	0.090527	-0.12285	19.4769	-13.28283	20.9192	0.11279	-0.146	0.016113	6.622	-252.173	1451.246	-2.4605	0.71533	0.040772	19.239	-147.454	1308.757	-2.8497	0.95731	-0.27295
3.684	12.412	66.6103	154.7574	-0.16836	0.072559	-0.11309	15.975	-30.116	14.0924	0.1128	-0.14561	0.017188	47.93	-259.919	1505.894	-2.5757	0.70068	0.051758	71.627	-187.402	1282.745	-3.2776	1.2255	-0.16416
3.686	17.944	65.9845	148.4957	-0.15078	0.052637	-0.10166	35.791	16.3277	-2.375	0.11075	-0.14395	0.032324	45.7177	-178.025	1565.0255	-2.7241	0.69775	0.058594	122.652	-271.689	1261.175	-3.4604	1.4716	0.0006836
3.688	17.354	66.8679	137.7247	-0.13281	0.029785	-0.094238	28.902	-13.695	-9.6453	0.10683	-0.1459	0.038575	19.02	-154.3854	1564.9535	-2.793	0.70508	0.053711	156.948	-294.631	1228.638	-3.4319	1.6274	0.090138
3.69	8.817	91.333	113.5443	-0.11435	0.0023438	-0.085645	38.582	0.9711	16.85932	0.104	-0.14385	0.045606	-2.621	-113.506	1539.3	-2.9116	0.74561	0.04248	157.928	-280.114	1244.196	-3.2793	1.6777	0.063477
3.692	21.115	79.775	121.6556	-0.093848	-0.019825	-0.074609	33.694	4.5701	9.0128	0.099609	-0.13721	0.054199	18.721576	-101.764	1524.046	-2.9868	0.79346	0.028564	148.29939	-244.004	1238.6023	-3.0734	1.6836	-0.064648
3.694	25.908	64.0537	124.8685	-0.073926	-0.051074	-0.071485	1.702	-32.331	3.45	0.095899	-0.13711	0.057617	3.344	-71.751	1560.149	-3.0581	0.8501	0.010742	158.841	-173.533	1212.989	-2.8059	1.6961	-0.19248
3.696	-2.176	45.41958	106.0614	-0.060156	-0.070996	-0.065723	22.8793	26.732	-0.0280999999999993	0.092383	-0.13701	0.064159	-8.436	-78.642	1591.219	-3.1323	0.93604	-0.024902	183.019	-167.649	1234.697	-2.4809	1.6851	-0.27803
3.698	-5.955	41.8886	90.4573	-0.04541	-0.09082	-0.060059	29.5874	15.2705	-10.2784	0.091211	-0.13623	0.071189	-41.7508	-88.878	1620.45	-3.1538	0.98096	-0.035156	255.849	-166.258	1311.437	-2.153	1.6131	-0.33359
3.7	18.192	56.24	86.995	-0.040137	-0.10762	-0.052539	-3.674	-14.2585	14.7918	0.084377	-0.13614	0.070604	-81.081	-78.268	1624.6565	-3.1694	1.0649	-0.056641	220.051	-189.2913	1403.568	-1.8862	1.4907	-0.38037
3.702	13.841	61.347	92.9609	-0.034375	-0.12275	-0.04834	13.9392	14.4582	-3.795	0.07666	-0.12939	0.078613	-106.444	-71.0331	1605.7069	-3.1656	1.0991	-0.083008	214.244	-207.8688	1469.053	-1.7298	1.3308	-0.42119
3.704	-3.037	58.157	65.3425	-0.030078	-0.13408	-0.042871	17.7988	-39.908	-23.72039	0.071874	-0.12793	0.085158	-91.443	-55.511	1556.333	-3.1543	1.127	-0.10693	154.176	-227.4114	1486.94	-1.6734	1.1669	-0.45342
3.706	1.53	46.813	49.3962	-0.026465	-0.14317	-0.039063	5.5937	-1.0217	-0.764799999999999	0.065332	-0.12802	0.092088	-68.329	-89.637	1585.6293	-3.1167	1.1509	-0.11963	127.142	-254.8527	1487.182	-1.7144	1.0345	-0.46787
3.708	11.855	43.299	61.5794	-0.021484	-0.15479	-0.031738	0.94287	26.1674	3.5189	0.057895	-0.12216	0.10031	-64.8434	-95.7122	1595.0876	-3.1055	1.1543	-0.12207	72.262	-296.631	1488.274	-1.8255	0.95146	-0.46963
3.71	12.0292	50.006	76.3471	-0.018457	-0.16436	-0.026758	-17.17975	-7.4476	9.2852	0.04374	-0.1208	0.10244	-84.764	-130.223	1625.63	-3.0718	1.1587	-0.11865	82.41175	-337.119	1510.7257	-1.9917	0.91943	-0.45752
3.712	-2.067	33.21	71.003	-0.015723	-0.17031	-0.020703	-23.1975	24.9795	-6.6256	0.036621	-0.11475	0.10059	-64.324	-92.95	1619.384	-3.0563	1.1526	-0.11328	36.6673	-326.555	1496.741	-2.1881	0.93887	-0.44219
3.714	-7.973	23.2055	84.87	-0.012989	-0.17539	-0.015625	-24.4052	-1.9379	-38.362	0.026487	-0.11289	0.10263	-17.745	-92.539	1647.418	-3.0332	1.1426	-0.1084	-35.1528	-325.542	1535.567	-2.3856	0.98593	-0.43164
3.716	-11.503	23.2842	69.0368	-0.0099611	-0.18135	-0.0086915	-15.4283	-26.363	-5.49258	0.018675	-0.10723	0.10323	-3.0886	-42.85	1615.8238	-3	1.1289	-0.085449	-53.11	-270.374	1539.818	-2.5559	1.0633	-0.43555
3.718	-0.398	32.172	47.58748	-0.0048828	-0.17822	-0.00097656	-17.5531	9.6196	16.492	0.010487	-0.10413	0.099339	-19.763	-53.7912	1602.2078	-2.9746	1.1172	-0.079102	-36.0027	-247.425	1538.129	-2.6886	1.1546	-0.43721
3.72	-7.303	28.659	23.0153	-0.0022461	-0.18184	-0.0013672	-9.386289	-22.0989	12.2958	-0.00075883	-0.10002	0.094341	-11.569	11.709	1499.641	-2.9258	1.0908	-0.06543	-28.357	-184.425	1548.477	-2.7754	1.25	-0.44336
3.722	-13.971	29.553	22.1315	0.0013672	-0.1792	0.0014648	-13.3481	3.0222	1.98503	-0.012695	-0.094727	0.095215	-0.0589999999999975	-18.5738	1521.6033	-2.8777	1.0657	-0.053711	-51.4171	-131.471	1586.953	-2.8204	1.3456	-0.45635
3.724	3.157	28.405	29.3355	0.0044922	-0.17099	0.0045899	-18.3639	21.6479	-17.85311	-0.022913	-0.085485	0.090987	18.188	44.371	1497.341	-2.8247	1.0337	-0.045898	-83.193	-90.86	1618.03	-2.8452	1.4365	-0.46836
3.726	19.82	28.135	17.6469	0.0052734	-0.16523	0.009961	-3.755	-6.19305	-12.4774	-0.032522	-0.079114	0.094513	35.753	3.139	1519.125	-2.7422	0.99219	-0.039063	-117.831	-29.491	1609.729	-2.8487	1.5079	-0.48985
3.728	-12.722	34.955	10.8154	0.0087891	-0.15576	0.011719	9.544	40.895	1.7142	-0.046967	-0.070452	0.094152	38.483	61.827	1493.012	-2.7007	0.97412	-0.033691	-129.006	-0.664999999999999	1568.136	-2.8432	1.5748	-0.50723
3.73	-1.609	24.7761	28.6848	0.014356	-0.15205	0.014355	5.6163	37.985	-17.8557	-0.058448	-0.060738	0.093637	57.674	30.071	1495.915	-2.6074	0.93945	-0.017578	-96.821	21.008	1526.726	-2.8315	1.6313	-0.53076
3.732	-0.675999999999998	17.2327	45.358	0.019043	-0.1459	0.016113	-3.0271	4.06649	-13.8253	-0.07373	-0.055176	0.098145	6.402	111.329	1412.957	-2.531	0.91431	-0.0051269	-132.394	5.29	1537.093	-2.8111	1.6568	-0.55098
3.734	10.33	22.234	28.0565	0.026856	-0.13731	0.014551	25.8949	38.458	-3.8861	-0.080206	-0.044733	0.10443	18.9651	88.435	1397.812	-2.4644	0.88525	0.0039063	-106.9	-1.867	1542.975	-2.7828	1.668	-0.56895
3.736	6.372	28.887	23.8355	0.026953	-0.12969	0.016406	6.3302	-10.6836	3.4328	-0.08638	-0.030429	0.10523	17.743	153.979	1337.701	-2.3784	0.84814	0.013672	-92.089	-40.2633	1568.066	-2.7512	1.6621	-0.57324
3.738	22.2579	27.152	14.1038	0.026367	-0.12158	0.012207	32.6972	3.77431	3.9295	-0.091782	-0.023862	0.10659	46.311	92.595	1377.9237	-2.334	0.83203	0.020996	-51.682	-51.6955	1558.7868	-2.7173	1.6507	-0.5665
3.74	10.6432	15.0881	17.65578	0.02666	-0.11582	0.012598	36.3911	35.623	-13.17789	-0.093271	-0.01955	0.10642	3.862	114.663	1388.019	-2.2466	0.79053	0.037598	17.056	-84.109	1578.3709	-2.6792	1.6294	-0.5459
3.742	-7.576	16.56436	-8.317	0.021094	-0.10733	0.016602	12.7351	14.304	-12.3266	-0.09375	-0.01416	0.10547	16.8854	28.2955	1386.075	-2.1821	0.76221	0.049317	64.517	-80.301	1590.259	-2.6497	1.6132	-0.51894
3.744	1.635	14.0432	-4.59341	0.012109	-0.094824	0.012696	17.9931	46.884	13.3714	-0.088323	-0.0077939	0.11074	-35.8516	93.53	1333.4336	-2.1191	0.73633	0.058105	60.058	-53.233	1592.478	-2.6164	1.5957	-0.48818
3.746	16.79	1.7051	3.74259	0.0015625	-0.075879	0.015234	9.5557	23.61	7.99646	-0.077173	0.0014139	0.1091	3.74491	79.6117	1326.9766	-2.0273	0.69531	0.064941	79.8773	-38.4632	1580.924	-2.5707	1.5789	-0.4456
3.748	3.72	0.1094	19.5353	-0.012207	-0.068848	0.015625	20.9319	-16.6871	1.604	-0.064789	0.0051656	0.10861	-26.29	176.25	1274.539	-1.9824	0.66602	0.072754	127.649	12.3249	1554.916	-2.5246	1.5539	-0.40625
3.75	11.398	9.8007	13.1925	-0.023535	-0.054004	0.022071	38.5138	14.0815	13.4334	-0.047437	0.0064465	0.10547	-9.757	137.3968	1268.15	-1.8867	0.62305	0.073242	120.635	28.3869	1530.508	-2.4702	1.52	-0.37598
3.752	15.495	3.2583	24.629	-0.033301	-0.041797	0.025196	20.8951	-10.7512	5.6711	-0.02832	0.0078125	0.10449	-44.619	165.231	1213.973	-1.8074	0.58789	0.070556	119.226	70.777	1496.2815	-2.3972	1.4731	-0.34941
3.754	17.404	20.9833	29.221	-0.041113	-0.029687	0.026367	9.75293	5.6672	18.387	-0.0067608	0.0076529	0.104	-42.034	93.779	1204.843	-1.7266	0.55176	0.075684	104.614	97.425	1470.69	-2.3214	1.4189	-0.33076
3.756	-8.419	22.843	30.007	-0.045996	-0.015039	0.030273	-4.4809	36.602	-6.7248	0.016297	0.0070272	0.10592	-62.178	146.544	1161.975	-1.6211	0.50586	0.072266	75.298	96.7481	1446.086	-2.2343	1.3591	-0.31162
3.758	-11.132	26.1759	-0.5662	-0.04541	-0.0048828	0.033691	2.677	-1.3229	-7.1125	0.034555	0.00093024	0.093531	-43.6683	117.4814	1123.55189	-1.5698	0.4873	0.069824	87.964	117.4554	1395.7419	-2.1441	1.2965	-0.29561
3.76	-5.127	18.3351	0.142399999999999	-0.04668	0.0070312	0.028711	6.782	25.5348	24.303	0.055093	-0.006433	0.098187	-69.3625	194.588	1076.662	-1.4565	0.4458	0.062012	84.753	123.298	1344.294	-2.0488	1.2334	-0.28027
3.762	3.82	22.8176	11.6389	-0.040722	0.016113	0.028125	-3.6058	13.17468	14.7527	0.070313	-0.013672	0.094238	-44.05642	171.6225	1057.621	-1.3796	0.41675	0.058349	79.595	141.4772	1294.081	-1.9534	1.1728	-0.26182
3.764	6.933	14.2103	5.1177	-0.037988	0.02041	0.025	-11.6497	-8.1501	12.0917	0.087218	-0.020733	0.092047	-42.421	231.555	1007.562	-1.2988	0.38965	0.05127	61.39599	151.2959	1249.97	-1.8574	1.1068	-0.24795
3.766	0.872	6.72583	6.2466	-0.025586	0.028418	0.021192	-5.8189	37.522	17.0786	0.10472	-0.023056	0.091137	3.454	208.5542	971.238	-1.1909	0.35498	0.04248	15.5206	147.5167	1245.2653	-1.7686	1.0501	-0.22725
3.768	-5.864	9.3472	12.1106	-0.016602	0.030273	0.019531	-29.503	6.53932	-5.81185	0.11607	-0.036145	0.086139	-7.582	251.815	931.6077	-1.1343	0.33203	0.038574	-4.881	132.585	1228.269	-1.6822	0.98889	-0.21738
3.77	-6.877	9.8455	15.253019	-0.0036133	0.032715	0.013867	-26.3871	7.0997	19.9697	0.12525	-0.042564	0.078363	25.8706	200.7859	899.966	-1.0391	0.29492	0.032715	17.8502	157.7542	1212.3452	-1.603	0.93213	-0.20605
3.772	-2.153	19.4587	1.7015	0.003418	0.028906	0.01123	-1.9107	3.6381	9.41275	0.13721	-0.046875	0.072266	-19.091	220.4525	877.884	-0.96069	0.27075	0.027344	-3.175	171.345	1158.116	-1.5179	0.86474	-0.19932
3.774	-11.91	18.5986	7.0967	0.01084	0.026172	0.0073243	-32.8483	-38.905	-2.71378	0.1428	-0.051873	0.063747	0.983000000000001	178.798	796.9422	-0.89404	0.24658	0.029297	-37.6133	199.876	1144.759	-1.4393	0.79912	-0.19482
3.776	-1.57	24.376	11.706	0.015527	0.024512	0.003125	6.397	7.9364	10.7898	0.15131	-0.055999	0.054067	22.415	197.6328	758.704	-0.8042	0.20361	0.012207	-57.31071	213.2691	1128.8366	-1.3628	0.73155	-0.18974
3.778	6.105	18.2612	21.968153	0.016602	0.016113	0.0019531	-1.9617	-4.25787	-10.8155	0.15556	-0.059463	0.042335	77.539	174.06	709.798	-0.76123	0.18652	0.010742	-81.839	177.489	1109.339	-1.2875	0.6666	-0.1835
3.78	7.365	15.1698	3.7996	0.024805	0.0083984	-0.0015625	-18.7528	-14.6647	8.2563	0.15918	-0.063268	0.037211	38.691	191.971	680.174	-0.68018	0.14551	0	-65.356	170.571	1038.047	-1.2144	0.604	-0.18115
3.782	-9.342	16.9631	12.9582	0.030859	-0.00087892	-0.00019532	25.9142	25.1083	15.7425	0.15625	-0.06543	0.023926	50.736	181.915	644.322	-0.61743	0.11743	-0.0056153	-35.1914	155.531	994.7594	-1.1436	0.54492	-0.16582
3.784	7.428	6.3828	17.2822	0.037891	-0.012988	-0.0044922	-6.0183	-37.776	-6.7856	0.15898	-0.063284	0.0091875	49.298	212.00782	589.593	-0.5625	0.093262	-0.013672	-36.1771	187.9867	948.4869	-1.0729	0.4876	-0.15771
3.786	5.764	7.0236	23.8466	0.044824	-0.021777	-0.0072266	10.8322	-23.327	5.1806	0.15849	-0.065434	-0.0052616	89.445	214.26	556.8081	-0.4834	0.057617	-0.02002	-58.4501	220.71	904.4605	-1.005	0.43565	-0.14287
3.788	3.487	17.7102	13.4808	0.052734	-0.031738	-0.01709	25.1128	6.235	-6.023	0.15655	-0.064646	-0.016591	100.5226	220.07	527.97	-0.44629	0.043457	-0.020508	-61.53	236.109	865.9094	-0.93565	0.38916	-0.13623
3.79	2.958	13.5059	16.6081	0.062012	-0.040918	-0.019824	-5.7741	-13.3768	-1.5456	0.15156	-0.061133	-0.032904	101.051	197.436	473.278	-0.37646	0.0043945	-0.030762	-23.477	259.813	785.146	-0.86719	0.3418	-0.12598
3.792	16.992	15.8558	16.95141	0.070801	-0.048242	-0.030859	29.3835	31.999	12.7057	0.15332	-0.057617	-0.049316	52.877	198.167	444.509	-0.31201	-0.02832	-0.037598	10.588	261.557	716.345	-0.80088	0.30068	-0.12656
3.794	1.383	18.1344	1.5889	0.086816	-0.060352	-0.042187	33.0934	7.1584	-21.5244	0.14922	-0.051269	-0.062407	46.324	207.66	414.911	-0.28564	-0.044922	-0.039063	81.7	282.268	696.617	-0.7335	0.26162	-0.12315
3.796	2.544	25.1644	-3.6329	0.095801	-0.077148	-0.048926	8.4128	-29.268	5.034	0.14746	-0.051462	-0.078034	34.764	191.691	370.207	-0.23584	-0.071777	-0.046387	78.419	275.933	682.9175	-0.66319	0.22412	-0.12432
3.798	15.303	12.20727	25.2091	0.10742	-0.087891	-0.060547	27.5608	-1.764	30.069	0.14277	-0.044432	-0.097955	36.6969	203.638	352.661	-0.20214	-0.090332	-0.051026	67.935	281.908	638.862	-0.59053	0.1919	-0.125
3.8	3.821	-7.3469	69.0022	0.12021	-0.10205	-0.06875	32.344	-47.9886	56.937	0.12793	-0.048536	-0.1291	17.556	198.534	314.4872	-0.16943	-0.096191	-0.053711	83.3222	252.02	590.039	-0.52246	0.1582	-0.12695
3.802	-12.421	-25.0994	102.8219	0.13428	-0.11309	-0.077441	26.2137	-22.3761	102.149995	0.10352	-0.047363	-0.1582	31.889	215.912	272.453	-0.15039	-0.10059	-0.068359	126.452	254.611	537.0023	-0.44443	0.13037	-0.13828
3.804	20.776	-19.23	118.8178	0.14873	-0.12558	-0.088379	26.9709	29.7598	122.288	0.067971	-0.037892	-0.18525	-6.647	185.077	256.29	-0.1377	-0.10303	-0.070801	123.206	233.573	493.904	-0.38154	0.11504	-0.16709
3.806	11.886	-16.8065	148.2153	0.15899	-0.13496	-0.092774	30.029	-19.1992	174.521	0.027544	-0.016798	-0.20645	-34.33	177.517	234.8134	-0.10303	-0.12695	-0.061523	129.59	217.148	461.2104	-0.34717	0.10254	-0.17646
3.808	29.705	-12.819	191.1098	0.16895	-0.14063	-0.10059	49.0482	19.1684	218.1408	-0.033394	0.00038982	-0.21035	-27.998	129.826	236.566	-0.076172	-0.15162	-0.050293	141.884	202.93943	427.663	-0.296	0.060938	-0.16729
3.81	72.979	-42.152	232.0744	0.17617	-0.14492	-0.10899	24.564	26.3569	247.161	-0.11201	0.021874	-0.2251	-0.289000000000001	139.171	225.2798	-0.0625	-0.1748	-0.039063	123.313	157.065	401.479	-0.23633	0.0043945	-0.15479
3.812	72.345	-55.287	238.031	0.17841	-0.14775	-0.12011	22.118	32.3635	322.103	-0.20459	0.05127	-0.22705	-3.042	112.5412	205.374	-0.058105	-0.19238	-0.029785	131.196	132.6105	351.257	-0.17012	-0.054004	-0.1457
3.814	78.724	-53.857	292.25488	0.17725	-0.15244	-0.13496	30.4872	104.6196	383.67311	-0.30107	0.078419	-0.23164	-8.21	155.062	192.091	-0.056152	-0.19141	-0.027832	123.846	99.909	309.139	-0.10244	-0.104	-0.13799
3.816	74.962	-58.4489	323.729	0.17002	-0.15508	-0.15703	-30.8509	89.539	448.9416	-0.39189	0.10791	-0.21738	-45.766	110.064	185.703	-0.061035	-0.19092	-0.029297	115.703	108.44	260.7432	-0.039551	-0.14424	-0.14541
3.818	84.098	-55.55541	322.6488	0.16064	-0.14941	-0.17041	6.554	115.2591	533.14972	-0.46221	0.12783	-0.19238	-44.5207	140.79	147.1702	-0.067383	-0.18433	-0.026611	76.3223	121.114	220.6038	0.013867	-0.17217	-0.15879
3.82	62.895	-37.602	338.745	0.14306	-0.12969	-0.19892	7.3465	120.551	597.045	-0.55771	0.13535	-0.17217	-32.12	86.4183	119.506	-0.075195	-0.17578	-0.02832	54.89865	128.847	198.814	0.061035	-0.19678	-0.17871
3.822	57.234	-2.3533	378.8137	0.10664	-0.091211	-0.22334	-22.6564	53.2	669.469	-0.69531	0.17676	-0.16992	3.175	97.45	82.5174	-0.084473	-0.16699	-0.022949	36.8654	143.474	173.9244	0.10733	-0.21221	-0.19336
3.824	17.0248	6.7246	414.7726	0.05039	-0.039258	-0.25654	5.6503	36.897	735.144	-0.83994	0.24082	-0.14267	-0.631	34.542	85.772	-0.088379	-0.15674	-0.019043	12.673	142.5398	141.9266	0.14228	-0.22803	-0.21104
3.826	-10.8775	18.0953	448.1392	-0.026855	0.017187	-0.28574	-24.1443	4.241	782.7191	-0.99141	0.31211	-0.10791	19.648	69.5903	78.796	-0.10059	-0.14209	-0.014648	4.739	143.998	122.261	0.16416	-0.23896	-0.23174
3.828	-37.3658	37.4028	488.88232	-0.11279	0.084961	-0.30713	15.016	-40.618	833.1826	-1.1605	0.38204	-0.053223	-3.681	24.649	36.6509	-0.10278	-0.1333	-0.0046386	-40.3053	120.4008	79.9166	0.18018	-0.24648	-0.25195
3.83	-19.6781	53.2663	521.7748	-0.20752	0.15996	-0.3294	48.0727	-60.88	827.7848	-1.3672	0.46309	0.0091796	3.896	73.876	28.282	-0.10352	-0.12354	0.0039063	-39.9088	100.515	60.117	0.17822	-0.25049	-0.26465
[truncated: 28,085 more rows]
