# Supplementary material for: Reliability and Validity of Running Cadence and Stance Time Derived from Instrumented Wireless Earbuds
Source: Sensors (Basel). 2021 Nov 30;21(23):7995. doi: 10.3390/s21237995 (PMC8659722; doi:10.3390/s21237995)
Supplement: Supplementary file 1 [file sensors-21-07995-s001.zip › Data_P14_speeds_2.csv]

time	S7kmh_force_plate_1	S7kmh_force_plate_2	S7kmh_force_plate_3	S7kmh_earbuds_1	S7kmh_earbuds_2	S7kmh_earbuds_3	S10kmh_force_plate_1	S10kmh_force_plate_2	S10kmh_force_plate_3	S10kmh_earbuds_1	S10kmh_earbuds_2	S10kmh_earbuds_3	S13kmh_force_plate_1	S13kmh_force_plate_2	S13kmh_force_plate_3	S13kmh_earbuds_1	S13kmh_earbuds_2	S13kmh_earbuds_3	max_force_plate_1	max_force_plate_2	max_force_plate_3	max_earbuds_1	max_earbuds_2	max_earbuds_3
0	18.389	5.6761	18.7111	-0.13867	0.055664	-0.017578	11.447	-8.3727	13.1976	0.017578	-0.058106	0.03003	-22.483	1.8709	34.9285	0.15771	0.024414	-0.00097656	28.622	93.328	592.191	-0.09082	0.013184	-0.089844
0.002	-9.682	5.4728	27.995	-0.13941	0.062989	-0.0065918	13.889	25.9622	13.37895	0.024902	-0.060059	0.04248	-26.7892	9.4277	22.5821	0.12451	0.066406	-0.0014648	46.975	90.809	707.424	-0.10254	0.038867	-0.10381
0.004	7.11	12.3678	39.476	-0.1377	0.067871	-0.0063477	21.755	24.9758	-7.1529	0.03418	-0.061523	0.055664	-23.46	-15.5468	40.0646	0.10474	0.093019	-0.0029296	48.972	51.085	826.192	-0.10596	0.054981	-0.121
0.006	14.692	22.5965	30.767	-0.13184	0.072754	-0.0073242	36.822	-2.18637	14.3557	0.033691	-0.067871	0.058594	-25.506	25.4543	-4.793	0.086426	0.12354	-0.0014648	55.25	12.868	930.472	-0.11181	0.076465	-0.13701
0.008	-17.721	23.6537	13.762	-0.12158	0.075195	-0.0097656	7.048	43.238	0.3502	0.041016	-0.07666	0.065918	-43.685	-12.91	16.0013	0.069824	0.14844	-0.00048828	47.806	-45.067	1018.4191	-0.11142	0.082617	-0.146
0.01	-28.249	25.3458	14.625	-0.10742	0.075195	-0.0097656	3.689	19.1307	2.353	0.044922	-0.083496	0.06543	-41.9638	34.6164	-11.2818	0.0625	0.16602	0.00048828	76.967	-75.478	1106.758	-0.11768	0.081543	-0.15576
0.012	7.317	27.52	25.59	-0.094238	0.067383	-0.008789	15.583	26.775	3.601	0.055664	-0.091797	0.072266	-71.6821	-13.773	9.142	0.044922	0.19141	0.0043945	105.252	-118.568	1162.026	-0.12402	0.073047	-0.16416
0.014	-26.634	22.4637	27.9131	-0.077637	0.064941	-0.017578	0.0730000000000004	60.385	-4.504	0.063965	-0.096191	0.070313	-32.241	17.6194	15.8174	0.030273	0.21192	0.0063476	90.377	-155.299	1167.603	-0.13135	0.059571	-0.17647
0.016	-26.641	13.4605	19.9476	-0.054688	0.055176	-0.025879	38.696	17.5384	16.06497	0.071777	-0.10498	0.075684	-20.974	-35.755	61.304	0.016602	0.22949	0.012207	81.529	-191.546	1163.447	-0.13838	0.040039	-0.18701
0.018	-21.698	9.3812	30.366	-0.046875	0.047852	-0.025879	13.077	33.248	17.0154	0.080566	-0.1084	0.072266	-19.345	-7.648	74.674	-0.0014648	0.25293	0.015625	5.525	-234.9319	1151.239	-0.13857	0.017188	-0.19336
0.02	-21.003	12.805	22.9161	-0.01709	0.036621	-0.030762	-27.5204	36.7645	8.7917	0.086914	-0.11523	0.069824	-39.9301	-36.168	94.232	-0.0092773	0.25879	0.018066	-25.745	-267.374	1190.771	-0.13135	-0.0073242	-0.19678
0.022	-22.662	11.8582	26.124	0.00097655	0.025147	-0.035157	13.953	-0.387	24.652	0.09082	-0.12012	0.061035	-23.27	-11.77	110.817	-0.026855	0.27393	0.016602	-82.435	-277.216	1228.554	-0.12617	-0.026465	-0.20781
0.024	-32.879	8.5542	11.758	0.015625	0.010254	-0.032715	-11.456	31.663	20.4527	0.099609	-0.13037	0.055664	-35.9283	-48.316	150.5153	-0.039307	0.28394	0.019531	-86.718	-264.777	1251.986	-0.11387	-0.04375	-0.21387
0.026	-12.843	24.2877	26.0148	0.037598	-0.0063477	-0.033203	-28.9108	4.0308	25.4666	0.097656	-0.13135	0.057617	-8.862	-37.945	235.915	-0.053711	0.29248	0.020996	-105.848	-257.353	1285.319	-0.097851	-0.058984	-0.2248
0.028	-10.619	22.2333	22.048	0.044922	-0.012207	-0.04248	0.270000000000003	7.1988	40.0622	0.090332	-0.13867	0.047363	-3.3028	-63.222	312.214	-0.066895	0.30225	0.022461	-97.426	-244.077	1297.492	-0.07666	-0.071875	-0.23799
0.03	5.528	19.2657	15.2265	0.056152	-0.02832	-0.048828	-28.094	52.991	14.443	0.084228	-0.14112	0.041504	-45.863	-46.122	454.6718	-0.076172	0.30908	0.024902	-114.127	-234.2663	1301.2741	-0.065918	-0.083008	-0.25635
0.032	-14.345	11.58051	22.7754	0.070801	-0.038086	-0.054199	-15.633	20.3635	13.0568	0.075195	-0.14551	0.041992	-71.4282	-42.0756	523.941	-0.084473	0.30859	0.024414	-116.413	-190.214	1304.363	-0.072364	-0.094141	-0.27686
0.034	7.631	10.3775	31.904	0.081055	-0.041504	-0.056152	-0.624000000000002	43.9739	28.2585	0.062012	-0.14453	0.045898	-58.885	-37.021	603.0146	-0.090576	0.31396	0.023682	-80.985	-143.923	1345.405	-0.094044	-0.098828	-0.29258
0.036	33.614	16.5575	16.2295	0.088379	-0.055664	-0.0625	-32.7175	36.6902	10.3431	0.05127	-0.14844	0.046387	-79.6428	-14.363	642.307068	-0.09375	0.31787	0.023438	-114.32	-132.455	1391.1939	-0.15381	-0.091797	-0.2961
0.038	3.461	23.5597	9.7626	0.091309	-0.057617	-0.066895	-21.664	-6.2758	37.974	0.037109	-0.14453	0.047363	-59.844	-38.047	716.717	-0.10254	0.31201	0.012207	-91.687	-128.884	1422.228	-0.25059	-0.077344	-0.29287
0.04	14.228	19.715	29.5196	0.10107	-0.070313	-0.07373	-1.692	34.3575	23.23522	0.032714	-0.1438	0.042969	17.9194	-12.226	766.893	-0.10254	0.31494	0.0024414	-97.509	-176.161	1436.5356	-0.38379	-0.075195	-0.27637
0.042	24.3	22.4559	45.422	0.10425	-0.07251	-0.076416	-11.34	18.427	5.69656	0.025391	-0.13721	0.045898	19.032	-44.964	792.406	-0.11719	0.31787	-0.019531	-53.884	-227.795	1458.932	-0.53809	-0.058789	-0.25097
0.044	23.729	11.3032	42.84308	0.10596	-0.076172	-0.083008	2.593	13.5338	30.4493	0.016602	-0.12549	0.043945	19.859	-15.205	769.984	-0.12158	0.32105	-0.044678	-40.2	-261.602	1482.523	-0.70733	-0.042969	-0.21553
0.046	16.628	-3.759	29.238	0.11523	-0.078613	-0.085449	-20.613	50.37	17.3323	0.016113	-0.11963	0.038086	38.426	-57.2289	772.719	-0.13721	0.32568	-0.067383	-78.882	-269.375	1512.8199	-0.88741	-0.02539	-0.17217
0.048	15.118	-8.929	53.99088	0.11304	-0.081543	-0.095459	-1.986	9.5429	28.1064	0.010254	-0.10645	0.035156	63.565	-10.8239	794.332	-0.1748	0.33398	-0.094727	-94.579	-241.271	1536.217	-1.0779	0.0033203	-0.13506
0.05	22.965	-21.513	66.462	0.10498	-0.08252	-0.099609	27.105	27.866	24.3589	0.01416	-0.096435	0.029785	29.75	-69.811	798.175	-0.20117	0.33594	-0.12012	-74.298	-221.102	1564.884	-1.2671	0.038574	-0.11621
0.052	12.743	-25.804	76.932	0.091797	-0.085938	-0.11816	5.836	16.4928	20.0359	0.018555	-0.087891	0.030273	54.301	-52.361	822.052	-0.27393	0.34473	-0.17041	-6.744	-207.408	1578.223	-1.4581	0.089353	-0.12608
0.054	27.274	-17.483	85.62989	0.083496	-0.085938	-0.11816	28.864	-35.605	35.104	0.024414	-0.072266	0.018066	6.682	-170.935	827.045	-0.3435	0.36401	-0.20556	10.706	-202.376	1579.461	-1.6453	0.17011	-0.13896
0.056	13.565	-18.424	116.7563	0.049316	-0.07373	-0.12354	23.505	5.914	30.6914	0.029785	-0.070801	0.0083008	-18.762	-166.009	898.673	-0.42236	0.37744	-0.24072	51.253	-162.882	1593.4288	-1.8187	0.27051	-0.16123
0.058	28.256	-12.52	154.5208	0.013428	-0.064453	-0.12744	23.0416	-1.1768	14.5568	0.035156	-0.062012	0.010254	-36.2095	-207.52	942.614	-0.55127	0.39795	-0.28613	26.409	-114.8101	1612.59	-1.974	0.39082	-0.17998
0.06	8.32	12.0975	231.2725	-0.032715	-0.052734	-0.13281	37.378	2.8367	17.8973	0.042724	-0.057129	-0.0004883	-41.67	-156.742	991.972	-0.62891	0.41797	-0.31055	69.394	-53.421	1651.864	-2.0938	0.51074	-0.16455
0.062	15.082	66.1967	312.681	-0.098145	-0.036133	-0.13525	14.81	35.578	7.5762	0.049316	-0.055664	-0.0063477	-44.8923	-160.805	977.215	-0.80225	0.45996	-0.34521	96.891	-9.504	1621.092	-2.1843	0.61552	-0.16103
0.064	24.435	96.159	414.244	-0.13428	-0.025391	-0.13965	12.573	-16.9982	26.87903	0.057129	-0.057129	-0.02002	-14.974	-170.18	980.114	-0.9441	0.50708	-0.35009	111.878	-15.973	1606.895	-2.2909	0.71826	-0.18145
0.066	33.47	74.907	429.776	-0.20996	-0.013672	-0.14844	0.931000000000001	18.64887	20.2182	0.061523	-0.058105	-0.025879	13.2866	-228.116	1003.317	-1.082	0.56055	-0.33496	132.204	-2.42	1596.0355	-2.3878	0.82451	-0.21973
0.068	-0.390000000000001	48.921	453.0615	-0.2771	-0.0021972	-0.16797	9.434	35.394	16.8435	0.066406	-0.0625	-0.038574	-2.324	-273.221	1089.3776	-1.2383	0.6001	-0.28857	80.22551	-9.536	1583.5575	-2.4756	0.91426	-0.27149
0.07	-32.153	15.481	501.784	-0.34912	0.015625	-0.18799	11.897	-7.3319	29.393	0.064697	-0.066162	-0.046143	3.5914	-283.18	1160.245	-1.394	0.65479	-0.31982	79.7022	25.891	1574.29	-2.5098	0.99316	-0.30957
0.072	4.542	-1.56	593.413	-0.4707	0.056641	-0.20166	-2.359	32.882	11.29846	0.065918	-0.064453	-0.053711	-1.18	-317.735	1214.443	-1.6621	0.76953	-0.33789	47.9981	26.492	1585.06164	-2.5187	1.034	-0.36377
0.074	-10.058	-10.691	624.068	-0.53125	0.08252	-0.20117	-0.0269999999999975	3.2585	-9.2459	0.062012	-0.0625	-0.063477	-40.2774	-298.035	1233.805	-1.8259	0.8479	-0.31591	58.965	-8.8314	1568.1187	-2.4898	1.0509	-0.40186
0.076	3.068	-13.718	588.9667	-0.66943	0.13818	-0.20068	1.282	0.6208	-2.5146	0.061035	-0.062988	-0.070801	-86.108	-307.223	1235.935	-1.9531	0.92383	-0.28027	30.804	-57.542	1584.119	-2.4167	1.006	-0.43545
0.078	8.089	-36.827	611.463	-0.77807	0.1748	-0.18653	-16.54	48.574	-5.3828	0.054199	-0.057129	-0.087891	-59.668	-237.2749	1253.1112	-2.0801	0.99023	-0.24219	28.613	-91.56	1561.946	-2.3342	0.8998	-0.46846
0.08	-6.8318	-31.9969	606.3389	-0.89014	0.21973	-0.16016	-2.012	-8.5315	12.1245	0.050049	-0.054688	-0.086914	-48.303	-216.989	1294.901	-2.1304	1.02	-0.23486	12.328	-68.254	1575.414	-2.2397	0.75049	-0.47412
0.082	-23.6064	-23.183	618.0251	-1.0542	0.27979	-0.12939	-13.253	15.1855	20.059	0.047852	-0.046875	-0.095215	-36.038	-114.123	1360.504	-2.1855	1.0625	-0.23926	-1.875	-38.927	1601.418	-2.1571	0.57413	-0.45928
0.084	11.094	1.335	658.6844	-1.1514	0.31445	-0.10791	-45.5171	33.8113	-3.1741	0.039551	-0.042969	-0.10791	-74.839	-150.072	1357.873	-2.1777	1.0894	-0.24585	0.945	1.8	1565.869	-2.1096	0.40059	-0.43516
0.086	24.095	18.347	713.157	-1.3613	0.39063	-0.08252	-2.812	-1.26587	4.9778	0.036133	-0.039063	-0.11475	-95.038	-90.657	1367.3936	-2.1421	1.1108	-0.25537	7.616	8.5325	1534.9	-2.1144	0.25449	-0.41836
0.088	-40.8945	4.8522	746.011	-1.5303	0.46973	-0.078613	0.442	39.3539	14.250141	0.027832	-0.029297	-0.12744	-58.623	-118.595	1383.47	-2.0488	1.0986	-0.26514	2.091	25.0828	1481.214	-2.1772	0.16045	-0.3958
0.09	-49.864	-23.4	729.919	-1.6953	0.56299	-0.078125	-29.4363	8.4902	0.8963	0.026612	-0.023438	-0.13281	-11.775	-48.228	1434.738	-1.9951	1.084	-0.27539	-53.3242	27.629	1464.961	-2.2852	0.1123	-0.35742
0.092	6.938	-43.5438	731.677	-1.877	0.69531	-0.076172	-20.471	-6.5953	12.9363	0.015625	-0.021484	-0.13428	-30.58609	-77.346	1471.674	-1.8921	1.0376	-0.29639	-32.402	47.698	1445.569	-2.4156	0.13125	-0.33047
0.094	34.855	-21.649	752.938	-1.939	0.76416	-0.075195	-23.121	43.806	4.358527	0.0053711	-0.0092773	-0.14502	-18.121	-45.59	1481.0778	-1.8252	0.99709	-0.32227	-56.263	86.313	1400.13785	-2.5492	0.19375	-0.31602
0.096	50.152	2.53400000000001	755.3607	-1.9844	0.87012	-0.078125	1.77	12.08356	5.923	-0.0029297	-0.003418	-0.14843	-48.1189	-102.418	1484.482	-1.7754	0.96289	-0.34082	-61.7828	96.9542	1333.484	-2.6539	0.29688	-0.31914
0.098	4.903	-7.41200000000001	742.615	-1.9449	0.94385	-0.094724	8.191	32.4632	57.1391	-0.015137	0.0058594	-0.15625	-80.764	-82.1142	1489.26	-1.7593	0.93799	-0.36475	-53.1672	115.8021	1278.596	-2.7281	0.42109	-0.33769
0.1	24.699	-34.209	748.554	-1.8711	1	-0.12646	-12.668	17.068	48.68	-0.030762	0.012695	-0.16797	-86.65	-115.7791	1514.041	-1.7788	0.92432	-0.37744	-72.508	111.625	1240.5006	-2.7715	0.54883	-0.36719
0.102	19.731	-90.118	770.7363	-1.7227	1.0566	-0.18701	3.83	-45.1843	66.492	-0.043945	0.01709	-0.17432	-65.7305	-87.76398	1533.0359	-1.8623	0.92383	-0.39453	-31.785	152.83057	1220.0145	-2.8033	0.66621	-0.39805
0.104	40.795	-141.426	801.1161	-1.6401	1.0767	-0.21826	8.982	8.383	75.914	-0.068359	0.028809	-0.18896	-53.737	-114.417	1588.661	-1.947	0.92798	-0.40552	-40.8635	174.459	1188.847	-2.8179	0.75518	-0.42822
0.106	37.298	-166.123	833.633	-1.48	1.0649	-0.26709	-2.7047	-2.587	102.2986	-0.098146	0.036133	-0.20313	-66.318	-97.366	1577.496	-2.0293	0.93945	-0.41797	-0.657	195.721	1146.599	-2.8148	0.80596	-0.46025
0.108	30.032	-150.265	885.034	-1.3711	1.0112	-0.28808	33.493	-11.926	169.2592	-0.13818	0.041992	-0.20996	-66.8593	-103.412	1588.708	-2.1255	0.98291	-0.44482	2.707	188.278	1124.558	-2.8047	0.82422	-0.49531
0.11	-13.35	-138.199	909.348	-1.2715	0.91992	-0.30371	48.122	35.5946	230.6018	-0.21777	0.053223	-0.22363	-56.632	-73.254	1593.363	-2.1714	1.0103	-0.46045	-6.768	169.995	1123.449	-2.7925	0.81592	-0.53174
0.112	-42.054	-126.374	900.173	-1.1563	0.74219	-0.29883	62.25	4.0791	310.227	-0.271	0.058105	-0.22949	-48.8998	-36.3294	1597.129185	-2.2554	1.063	-0.48682	18.322	185.419	1114.424	-2.7782	0.79639	-0.56748
0.114	-16.725	-130.295	933.7509	-1.1045	0.64746	-0.29883	73.924	31.088	448.329	-0.39648	0.071289	-0.24219	-61.9167	8.534	1552.72	-2.3281	1.1064	-0.49463	63.1146	203.965	1079.7172	-2.7531	0.78017	-0.57784
0.116	10.995	-128.7125	995.359	-1.0229	0.46729	-0.31396	83.727	25.183	563.0671	-0.50977	0.079834	-0.24633	-40.6634	47.9751	1523.4549	-2.4038	1.1548	-0.49951	76.283	223.132	1027.85012	-2.7311	0.75517	-0.5794
0.118	45.475	-124.528	1062.0475	-0.99514	0.34864	-0.3291	123.588	-35.6756	667.468	-0.63867	0.091797	-0.23828	-64.887	45.8702	1502.7259	-2.498	1.2285	-0.49805	16.4917	205.4405	980.2983	-2.7019	0.73633	-0.58887
0.12	21.603	-110.112	1075.318	-0.98584	0.25537	-0.34521	104.871	-15.315	687.575	-0.84229	0.10693	-0.2168	-59.843	37.111	1539.4112	-2.5371	1.2676	-0.50586	22.9332	204.786	950.42	-2.6636	0.71143	-0.59521
0.122	26.781	-94.199	1067.427	-1.0112	0.16504	-0.34619	76.706	-58.436	737.468	-0.96289	0.11719	-0.20898	-82.295	26.3721	1541.9421	-2.5938	1.3457	-0.51172	13.1933	198.389	918.734	-2.6151	0.67783	-0.60342
0.124	29.547	-85.827	1092.008	-1.0444	0.14502	-0.34717	76.08	-89.631	824.963	-1.2319	0.14404	-0.17334	-51.33	50.7105	1524.7469	-2.612	1.3987	-0.52173	40.9516	206.373	900.27	-2.5633	0.64609	-0.60664
0.126	58.131	-94.942	1111.20568	-1.1597	0.15088	-0.34131	24.903568	-66.061	835.583	-1.4676	0.18701	-0.14038	-93.177	58.1271	1518.973	-2.6245	1.438	-0.52637	42.735	228.753	819.2221	-2.5043	0.61524	-0.61015
0.128	50.775	-108.248	1116.805	-1.2888	0.2063	-0.33081	-18.771	-99.908	842.499	-1.73	0.24756	-0.094727	-76.873	88.594	1476.6951	-2.6323	1.479	-0.53174	21.6041	232.871	742.431	-2.4481	0.58818	-0.61221
0.13	19.595	-100.4658	1138.634	-1.4272	0.2876	-0.33057	-27.423	-51.257	856.184	-2.1309	0.36963	-0.057617	-81.156	81.655	1449.7744	-2.6372	1.5	-0.53589	10.2532	265.267	699.952	-2.3843	0.56689	-0.61572
0.132	33.559	-90.705	1186.925	-1.605	0.43115	-0.34082	-24.006	-7.089	898.411	-2.3496	0.45166	-0.066895	-38.1084	87.349	1434.6407	-2.6382	1.5142	-0.54443	-40.192	251.476	681.077	-2.3258	0.54825	-0.6123
0.134	16.819	-64.129	1225.199	-1.6875	0.50879	-0.3418	-2.352	-62.183	966.922	-2.7188	0.65527	-0.07959	-66.008	36.3285	1455.75	-2.6445	1.5195	-0.54883	-21.6277	276.848	650.6525	-2.2644	0.53398	-0.60645
0.136	12.094	-54.4295	1246.1997	-1.834	0.66016	-0.3418	-2.871	-67.961	969.55	-2.9062	0.82666	-0.093994	-61.868	51.732	1437.4034	-2.646	1.5122	-0.54492	-20.6942	256.772	621.672	-2.1988	0.51875	-0.59161
0.138	20.681	-73.871	1281.0293	-1.9213	0.76709	-0.34034	-57.3153	-122.179	954.3339	-2.9878	0.99072	-0.1001	-70.87	33.9219	1452.149	-2.6284	1.4946	-0.53662	-33.9924	244.668	557.689	-2.1432	0.50332	-0.58086
0.14	36.876	-93.7381	1303.445	-1.9937	0.86084	-0.33643	-98.146	-169.802	1011.994	-2.8945	1.1797	-0.11621	-40.899	87.373	1409.285	-2.6167	1.4731	-0.52392	-90.261	247.869	504.07	-2.0859	0.48242	-0.5625
0.142	58.791	-90.64305	1309.314	-2.0742	0.96484	-0.34375	-75.436	-137.287	1050.07	-2.7871	1.25	-0.14111	-44.41	97.9876	1399.436	-2.5977	1.4551	-0.51758	-135.553	226.3334	473.742	-2.028	0.46182	-0.53682
0.144	51.77	-57.227	1308.65	-2.103	1.0083	-0.34131	-56.979	-160.158	1071.2987	-2.4863	1.3535	-0.22852	-36.7709	155.056	1335.912	-2.5664	1.4336	-0.50195	-121.933	223.153	429.1017	-1.9659	0.44932	-0.51524
0.146	97.7034	-40.675	1330.814	-2.1577	1.0737	-0.35303	-16.064	-138.604	1087.44	-2.2429	1.3723	-0.31275	-52.59	141.5792	1330.7807	-2.5508	1.4258	-0.49414	-108.638	183.2514	383.248	-1.8987	0.43603	-0.49024
0.148	85.2254	-32.971	1348.7286	-2.1941	1.1116	-0.36987	-8.724	-130.756	1048.484	-2.0093	1.3286	-0.38232	-67.467	170.348	1305.867	-2.5132	1.397	-0.47412	-87.889	146.49	328.316	-1.8331	0.41884	-0.46641
0.15	76.645	-44.338	1336.8657	-2.2358	1.1411	-0.39258	-10.89697	-197.356	1063.352	-1.7637	1.125	-0.41992	-43.397	159.45639	1290.802	-2.4775	1.3638	-0.46143	-126.409	129.729	292.475	-1.7734	0.4082	-0.44336
0.152	52.135	-52.6577	1326.7543	-2.2773	1.1729	-0.41602	-48.834	-170.652	1134.489	-1.6719	0.97266	-0.42383	-45.6394	203.148	1250.364	-2.4316	1.3223	-0.45117	-112.372	143.4036	282.7167	-1.7134	0.3999	-0.41631
0.154	28.791	-51.8785	1330.1218	-2.2827	1.1821	-0.4292	-64.258	-194.901	1183.4465	-1.5425	0.63916	-0.44922	-16.001	199.914	1226.84	-2.3604	1.2568	-0.43555	-93.224	142.8156	271.2377	-1.6563	0.38974	-0.38985
0.156	34.143	-31.3804	1344.992	-2.2852	1.1758	-0.43799	-39.1257	-254.099	1274.869	-1.4842	0.41235	-0.47143	-40.5822	226.909	1179.0926	-2.3315	1.2231	-0.43311	-79.574	152.579	239.2817	-1.6004	0.38233	-0.3668
0.158	34.64	-11.248	1344.502	-2.2615	1.1468	-0.44019	-87.41	-239.19	1316.866	-1.4468	0.23486	-0.48486	-34.892	221.1676	1143.019	-2.2617	1.207	-0.4209	-61.403	146.663	207.756	-1.5392	0.38184	-0.3377
0.16	32.917	-11.9598	1315.289	-2.2285	1.1133	-0.43945	-102.212	-269.807	1309.248	-1.4409	0.081055	-0.48389	-48.3041	241.402	1106.364	-2.2068	1.1867	-0.39624	-54.27	151.225	153.9475	-1.4824	0.38672	-0.30908
0.162	-6.896	-21.3985	1325.1969	-2.1772	1.063	-0.45215	-87.241	-249.201	1347.4334	-1.4688	0.031738	-0.47705	-7.503	243.988	1102.323	-2.1523	1.1602	-0.37695	-36.692	166.811	130.3503	-1.4223	0.39307	-0.28428
0.164	31.392	-17.737	1323.6844	-2.1563	1.0371	-0.45703	-37.002	-167.93949	1346.34	-1.584	0.0039063	-0.46436	-11.9024	254.014	1118.476	-2.0957	1.1113	-0.34863	-52.758	150.465	122.838434	-1.3602	0.39668	-0.26367
0.166	34.556	0.846	1322.7174	-2.1167	0.979	-0.4585	-1.617	-153.739	1382.785	-1.7263	0.05249	-0.45678	8.006	232.037	1077.78	-2.0664	1.0879	-0.33398	-11.228	154.742	115.7933	-1.298	0.40645	-0.23984
0.168	72.543	33.207	1339.4479	-2.1003	0.93969	-0.45581	40.682	-96.01	1426.21478	-1.8965	0.14551	-0.45508	-5.386	211.089	1043.144	-1.9971	1.0391	-0.30371	5.402	139.994	84.442	-1.2339	0.41357	-0.22022
0.17	61.429	34.528	1355.80134	-2.0835	0.90088	-0.45459	67.334	-68.385	1429.194	-2.1387	0.33887	-0.47266	-16.191	208.232	978.589621	-1.9355	0.99611	-0.28809	14.51	108.04	46.39	-1.168	0.4209	-0.19824
0.172	69.564	23.008	1374.982	-2.0776	0.86865	-0.45068	84.149	-128.184	1461.642	-2.2534	0.45166	-0.48193	-21.468	213.6621	955.3808	-1.8726	0.95557	-0.27979	49.352	96.961	19.8887	-1.1025	0.42871	-0.17617
0.174	65.076	4.2175	1332.812	-2.0767	0.85889	-0.45459	103.1604	-85.09	1469.4424	-2.4551	0.69336	-0.48633	3.329	232.408	921.088	-1.7808	0.89893	-0.271	46.9295	68.9586	43.289	-1.0401	0.42812	-0.15088
0.176	50.863	-0.4275	1315.4942	-2.0742	0.83594	-0.44775	107.304	-75.717	1453.168	-2.584	0.8711	-0.48633	7.631	227.762	897.307	-1.7256	0.86719	-0.26807	77.617	66.909	49.433	-0.98076	0.42812	-0.12666
0.178	61.518	12.0358	1344.593	-2.0728	0.83105	-0.43799	73.2935	-71.59	1502.387	-2.6909	1.0454	-0.49365	15.67	236.322	818.706691	-1.6294	0.81494	-0.26025	61.5466	38.599	44.272	-0.92119	0.42568	-0.10303
0.18	45.324	10.884	1326.034	-2.0698	0.81689	-0.43213	52.876	-2.92	1502.9212	-2.7749	1.2407	-0.51611	-2.151	219.731	812.304	-1.5669	0.77294	-0.25781	81.035	28.479	24.7772	-0.86719	0.4248	-0.086426
0.182	36.863	7.244	1298.1999	-2.0547	0.7959	-0.42383	9.065	-83.51	1507.9615	-2.8003	1.3267	-0.53613	11.313	238.826	762.093	-1.5054	0.73291	-0.25635	41.48758	10.2682	19.3328	-0.81475	0.42588	-0.067969
0.184	14.79	-2.083	1287.5375	-2.0508	0.7832	-0.42188	19.509	-103.923	1550.69	-2.7969	1.4473	-0.58008	-14.988	236.032	735.066	-1.4175	0.68604	-0.24707	27.239	5.4398	54.513	-0.75977	0.42285	-0.052051
0.186	38.967	-7.1477	1301.4195	-2.0249	0.76904	-0.42041	61.054	-77.2053	1556.629	-2.7566	1.4817	-0.60718	5.723	247.663	655.8578	-1.3828	0.6582	-0.24365	30.531	8.9588	69.075	-0.7043	0.41972	-0.042676
0.188	78.638	20.1285	1294.3037	-2.0044	0.75342	-0.41992	79.9043	-144.308	1601.9605	-2.6953	1.4766	-0.62891	0.0630000000000024	232.927	612.8086	-1.3062	0.61572	-0.22217	30.539	8.11444	65.965	-0.64844	0.41719	-0.03125
0.19	95.596	56.85	1255.518	-1.9805	0.73828	-0.41602	77.0367	-85.87648	1597.068	-2.5972	1.4087	-0.65186	5.259	230.664	565.849	-1.2497	0.58276	-0.21777	21.306	11.2596	51.71	-0.58936	0.41455	-0.026367
0.192	101.589	66.99	1257.2086	-1.9468	0.70557	-0.41748	75.6919	-75.1785	1545.953	-2.5527	1.3594	-0.65576	6.029	217.1593	537.5161	-1.1924	0.54883	-0.20898	-21.646	-12.6329	52.18	-0.53525	0.40361	-0.01543
0.194	78.973	71.916	1274.787	-1.9336	0.69336	-0.41406	110.0552	-81.35467	1589.932	-2.4785	1.2402	-0.65625	2.772	249.528	481.0836	-1.1055	0.50391	-0.20313	-33.595	-5.3175	37.376	-0.48623	0.39922	-0.0034179
0.196	88.122	67.058	1259.715	-1.9019	0.6665	-0.41748	106.7567	-0.144999999999996	1573.273	-2.4499	1.1419	-0.64428	11.612	250.525	463.0993	-1.062	0.48682	-0.19482	-48.3718	-13.9632	19.6311	-0.44561	0.38437	0.0024414
0.198	82.5	55.529	1228.746	-1.8818	0.64942	-0.42041	61.7425	-51.738	1556.494	-2.4375	1.0439	-0.625	12.462	247.514	445.624	-0.97852	0.44336	-0.18945	-30.687	15.5752	-10.0464	-0.41319	0.36807	0.012305
0.2	94.405	39.9353	1216.7436	-1.8652	0.62891	-0.41895	16.087	-39.785	1575.5272	-2.4258	0.93555	-0.58984	-21.916	201.5523	403.45	-0.91309	0.4082	-0.18116	-58.842	18.78145	-13.1041	-0.38574	0.34668	0.023438
0.202	53.274	39.115	1212.837	-1.8398	0.61621	-0.41113	-40.663	8.711	1546.791	-2.4199	0.89258	-0.57617	-2.697	197.369	395.407	-0.85107	0.36719	-0.17871	-50.93704	4.94	8.2334	-0.36728	0.32715	0.028613
0.204	24.565	58.6085	1174.966	-1.8281	0.60693	-0.41211	-47.914	-33.7042	1559.556	-2.4165	0.84619	-0.56201	26.927	164.668	345.422	-0.76514	0.3208	-0.16992	-49.1916	5.455	-2.5269	-0.35547	0.31289	0.041894
0.206	23.852	53.0611	1132.4354	-1.8047	0.60352	-0.40234	-9.07100000000001	50.674	1562.521	-2.406	0.82349	-0.54444	26.929	183.988	323.0191	-0.72217	0.29053	-0.16455	-72.4496	4.951	-13.14847	-0.35625	0.29844	0.053223
0.208	32.206	51.0785	1117.6989	-1.7847	0.59571	-0.39942	1.671	41.8159	1502.6634	-2.394	0.81689	-0.53467	-14.859	161.176	292.4268	-0.64404	0.24023	-0.15576	-32.639	23.758	26.3857	-0.36484	0.28926	0.063867
0.21	59.935	39.9219	1133.5026	-1.7578	0.59912	-0.39648	-5.322	-19.009	1510.714	-2.3804	0.82666	-0.52002	-9.243	171.328	256.104	-0.58764	0.20312	-0.15308	-31.816	12.834	19.894	-0.37451	0.28174	0.077148
0.212	49.202	52.2687	1125.151	-1.7246	0.60693	-0.38965	-11.262	34.617	1494.128	-2.3711	0.83008	-0.51465	-32.645	162.0508	220.4818	-0.52881	0.1626	-0.14746	-30.304	33.959	10.564	-0.38731	0.27666	0.09248
0.214	60.112	66.176	1085.529	-1.6992	0.61035	-0.39063	-20.524	-9.417	1473.6828	-2.3594	0.83789	-0.50195	39.57	173.219	207.018	-0.4541	0.12549	-0.13428	-10.35	29.715	3.587	-0.3959	0.26787	0.10186
0.216	51.607	86.519	1064.765	-1.6523	0.61426	-0.38574	35.619	35.111	1512.71	-2.3472	0.83056	-0.49731	25.606	148.0317	190.454	-0.42334	0.10889	-0.12891	-7.1004	15.7996	-5.4388	-0.40371	0.25811	0.11162
0.218	50.914	87.776	1064.142	-1.6162	0.61035	-0.3794	72.018	89.165	1458.7689	-2.3315	0.81299	-0.48828	17.503	169.95	203.607	-0.37109	0.072754	-0.12646	-12.611	17.5927	19.3375	-0.40322	0.25147	0.12226
0.22	53.003	91.242	1036.127	-1.5796	0.60791	-0.37354	51.278	6.927	1439.6694	-2.3018	0.75977	-0.46387	6.90499999999999	159.743	166.571	-0.33252	0.05249	-0.12305	19.158	13.7333	24.2324	-0.39697	0.24561	0.12842
0.222	40.679	89.613	1017.4644	-1.5288	0.59619	-0.36523	64.482	41.342	1437.6379	-2.2788	0.73096	-0.44775	22.167	157.016	140.2353	-0.29834	0.037109	-0.11963	35.267	24.2116	11.9607	-0.38252	0.23467	0.13653
0.224	17.681	92.013	988.87079	-1.5059	0.58984	-0.36572	51.364	16.6788	1396.644	-2.2417	0.67236	-0.42529	-30.084	132.9519	99.215	-0.25049	0.0092773	-0.10986	38.238	19.5507	22.6823	-0.36572	0.22265	0.14306
0.226	7.322	81.3122	975.984	-1.4629	0.57617	-0.35107	42.969	24.965	1436.7494	-2.208	0.63135	-0.41821	1.415	125.276	96.238	-0.22412	0.0053711	-0.10303	64.6912	32.6295	36.082	-0.33174	0.21328	0.14111
0.228	3.611	74.0805	960.646	-1.416	0.5625	-0.33594	87.316	105.0877	1419.454	-2.168	0.60596	-0.40625	11.591	113.731	88.8547	-0.18994	-0.022461	-0.094238	61.43	23.2378	28.7009	-0.30625	0.19658	0.14053
0.23	9.363	78.4745	937.0645	-1.3945	0.55664	-0.33203	84.4943	63.776	1368.561	-2.105	0.58643	-0.40576	14.961	110.547	77.838	-0.16748	-0.033448	-0.092285	68.4115	38.242	28.0722	-0.26904	0.17969	0.1416
0.232	39.662	82.7507	928.934	-1.3477	0.5459	-0.3208	90.8864	86.53	1337.373	-2.0684	0.57715	-0.40137	-5.687	93.085	50.5092	-0.14697	-0.04834	-0.092285	55.5837	56.357	23.7275	-0.2456	0.1669	0.14062
0.234	39.301	89.3036	879.3987	-1.3139	0.53125	-0.3186	85.8424	113.365	1275.948	-1.9961	0.56396	-0.3916	9.224	63.34	70.316	-0.12305	-0.063477	-0.089844	55.2418	57.849	28.418	-0.21914	0.15127	0.14472
0.236	26.834	92.0074	858.6919	-1.2808	0.52393	-0.30322	52.63	43.4	1244.702	-1.94	0.54858	-0.39282	-19.482	23.5759	68.48109	-0.12012	-0.071289	-0.090332	46.8782	68.599	28.2349	-0.18946	0.12783	0.15449
0.238	22.166	91.696	850.688	-1.2363	0.51611	-0.28711	87.075	104.436	1244.3478	-1.8921	0.53955	-0.38965	13.707	18.0331	35.365	-0.10547	-0.083008	-0.081543	24.082	34.729	34.2216	-0.16494	0.10303	0.1667
0.24	39.349	105.138	854.395	-1.2134	0.51465	-0.2793	111.244	100.719	1196.675	-1.8301	0.52246	-0.37207	23.324	17.5174	30.8687	-0.096436	-0.095215	-0.082764	14.131	17.9467	32.9459	-0.13965	0.076172	0.17822
0.242	52.626	113.641	827.4744	-1.1812	0.50439	-0.27295	97.51	86.934	1187.366	-1.7988	0.52148	-0.3623	0.91	25.113	31.4118	-0.098145	-0.104	-0.080078	-3.104	5.047	38.828	-0.12461	0.045215	0.18008
0.244	32.202	114.786	804.6857	-1.1531	0.49927	-0.26855	102.921	153.522	1150.311	-1.7422	0.51953	-0.34717	-17.418	12.9476	48.073	-0.1001	-0.11084	-0.078613	10.807	9.4801	53.378	-0.10655	0.014257	0.18721
0.246	30.268	105.972	793.204	-1.123	0.49805	-0.25781	67.5956	123.869	1120.4481	-1.6997	0.52051	-0.34082	-7.766	-1.806	58.182	-0.10303	-0.11279	-0.075684	-12.758	1.1401	42.107	-0.09834	-0.014648	0.19658
0.248	-6.038	103.5366	774.021	-1.0859	0.50293	-0.24219	78.071	151.37	1131.09436	-1.6504	0.52539	-0.33691	-13.752	-8.192	14.0139	-0.11328	-0.11377	-0.072266	-31.8	-13.8376	25.067	-0.094433	-0.042773	0.19697
0.25	22.631	127.301	730.3477	-1.0684	0.50195	-0.23633	62.9358	191.647	1093.0173	-1.5781	0.53516	-0.33008	-15.572	-1.862	12.8286	-0.12158	-0.10816	-0.067383	-34.89	-19.1668	17.22	-0.08252	-0.067383	0.20947
0.252	17.35	117.7379	709.43832	-1.0332	0.49512	-0.23145	-11.856	123.329	1061.30924	-1.541	0.53418	-0.3252	4.577	2.149	20.2781	-0.13281	-0.10791	-0.067871	-40.248	-18.6129	5.1447	-0.069629	-0.097264	0.21592
0.254	1.735	101.8884	693.0541	-1.0029	0.4917	-0.22608	9.63	163.1681	1039.698	-1.4565	0.54248	-0.31494	-16.37	19.1744	34.69137	-0.13037	-0.10547	-0.060059	-34.2927	6.989	28.94336	-0.05498	-0.12295	0.22217
0.256	6.275	91.7959	659.263	-0.97461	0.48828	-0.21924	-13.056	132.377	994.88	-1.3935	0.53613	-0.30762	11.877	32.8434	11.4931	-0.13428	-0.10205	-0.060059	-38.0857	-8.8977	39.9205	-0.028809	-0.1417	0.2292
0.258	9.129	103.1697	629.168	-0.9292	0.48486	-0.21582	-35.948	106.363	964.4561	-1.334	0.53125	-0.29932	-3.525	29.1468	1.54466	-0.12646	-0.099609	-0.053223	-65.886	-0.8902	8.3612	0.0092775	-0.16055	0.23233
0.26	17.918	113.3994	619.426	-0.90723	0.48389	-0.21387	-18.01	183.978	900.855	-1.2617	0.52051	-0.27881	-9.077	23.5299	-17.344	-0.12719	-0.098878	-0.046142	-50.2192	-14.3229	8.672	0.05127	-0.1792	0.2334
0.262	3.713	121.678	605.9123	-0.8667	0.48291	-0.20752	-62.4059	147.353	843.488	-1.228	0.51318	-0.271	-22.669	13.4431	22.829	-0.12451	-0.095215	-0.043457	-17.743	7.3281	4.981	0.086621	-0.19502	0.22568
0.264	8.578	115.726	589.7812	-0.84228	0.47876	-0.20288	-30.564	178.651	825.035	-1.1616	0.49854	-0.25098	-0.363999999999997	29.7465	-6.02167	-0.12256	-0.095703	-0.028809	-54.47702	30.8753	9.5772	0.12998	-0.20156	0.2166
0.266	3.57	112.464	551.5906	-0.81836	0.47559	-0.19824	-21.152	222.002	810.4184	-1.114	0.48608	-0.23511	-3.552	43.485	3.12	-0.11719	-0.086426	-0.021973	-13.149	35.97	8.961	0.17647	-0.20391	0.20371
0.268	-20.099	106.55	526.8759	-0.78125	0.47168	-0.19141	-33.057	169.001	798.8896	-1.0723	0.47754	-0.22461	14.059	54.1496	6.472	-0.12256	-0.08252	-0.016113	-6.934	43.37	-1.676	0.21924	-0.21181	0.1916
0.27	-27.94	115.478	520.329	-0.76563	0.4707	-0.18945	26.638	229.501	785.246	-1.0117	0.46729	-0.20361	-0.0530000000000008	18.2786	50.361	-0.12598	-0.078857	-0.0063476	-33.287	28.196	-16.0304	0.25928	-0.21484	0.17041
0.272	-16.649	128.218	505.291	-0.73584	0.46143	-0.18213	-10.348	206.138	738.54	-0.98047	0.4585	-0.19287	-10.475	8.261	17.2349	-0.1333	-0.07373	0.00097656	8.323	36.036	7.6874	0.29805	-0.21963	0.14541
0.274	-6.337	125.89	477.0173	-0.70899	0.46045	-0.17895	-41.5047	163.2379	704.1004	-0.91553	0.4458	-0.18066	-17.181	-8.2662	3.5826	-0.14648	-0.066406	0.014648	36.045	31.534	16.0864	0.33887	-0.22803	0.12949
0.276	-24.095	109.113	450.7496	-0.68115	0.44385	-0.16357	-42.6352	214.724	663.587	-0.87256	0.4375	-0.16626	18.343	17.5659	4.3388	-0.15381	-0.05957	0.022461	37.776	44.896	16.5197	0.3709	-0.23662	0.11309
0.278	-24.402	94.3762	438.8968	-0.64063	0.4375	-0.16504	-36.3089	163.0483	620.3153	-0.83105	0.42773	-0.14941	-4.7	14.276	40.0778	-0.17676	-0.04834	0.033691	42.2296	37.692	16.8446	0.39921	-0.24639	0.09248
0.28	-23.222	91.90446	425.506	-0.61865	0.43311	-0.15967	3.632	177.357	614.666	-0.76855	0.41113	-0.13818	20.039	36.168	18.6175	-0.18897	-0.04126	0.043702	48.9054	25.878	7.6184	0.4209	-0.25098	0.078125
0.282	-22.645	105.81	410.523	-0.57227	0.40918	-0.15039	19.0279	190.741	564.228	-0.73975	0.40186	-0.13232	2.122	14.6367	7.7285	-0.19873	-0.026855	0.056641	53.367	22.3079	29.1888	0.43623	-0.2628	0.066211
0.284	-1.532	108.469	397.6405	-0.54688	0.39551	-0.14624	-4.246	110.596	524.97722	-0.68359	0.3877	-0.11914	1.807	39.07348	-4.7774	-0.21436	-0.01123	0.068359	68.3336	27.1273	47.646	0.4459	-0.26845	0.056934
0.286	-1.7	107.845	371.2266	-0.51221	0.37939	-0.13818	13.1451	161.016	496.641	-0.6377	0.3789	-0.11255	-23.292	4.444	10.441	-0.21582	-0.0019531	0.07373	64.782	34.102	66.8222	0.45254	-0.26494	0.046387
0.288	-12.402	97.989	317.4277	-0.46924	0.36426	-0.12793	29.8656	138.7654	473.5058	-0.59375	0.3667	-0.099121	7.51	50.0294	33.9497	-0.21094	0.013184	0.085938	42.7092	20.751	32.6905	0.45097	-0.25918	0.030469
0.29	-17.864	99.877	316.9517	-0.44775	0.35254	-0.12012	37.2266	114.9126	477.688	-0.54297	0.35059	-0.092773	9.468	45.472	35.275	-0.20166	0.025147	0.095703	55.5167	34.7585	38.348	0.44141	-0.24121	0.021484
0.292	9.439	97.354	331.078	-0.40869	0.33057	-0.11621	54.2558	165.349	427.098	-0.51025	0.33691	-0.08252	25.192	78.915	17.2971	-0.18164	0.029297	0.099121	-1.151	16.1012	29.0541	0.42861	-0.2209	0.0083985
0.294	-18.356	118.443	323.63	-0.37256	0.31177	-0.10864	37.5957	102.3761	400.215	-0.45801	0.32178	-0.079102	3.524	37.8856	28.902	-0.14551	0.027832	0.10107	13.685	19.9584	38.424	0.40625	-0.19346	-0.0015625
0.296	2.856	129.149	300.4302	-0.34131	0.29443	-0.10645	29.1541	139.1935	388.911	-0.42163	0.30517	-0.070556	3.131	33.029	28.7379	-0.12354	0.022461	0.10449	19.192	14.9652	39.408	0.38594	-0.15908	-0.015625
0.298	-13.177	109.85	279.7775	-0.29443	0.27393	-0.10889	4.2607	171.397	344.338	-0.38672	0.28662	-0.062988	-34.139	-0.6449	27.338	-0.069336	0.016113	0.10156	17.131	2.5771	38.962	0.36709	-0.12217	-0.025977
0.3	0.0199999999999996	92.7228	286.331	-0.2793	0.25781	-0.10449	-34.4483	122.9958	328.9034	-0.34912	0.26318	-0.056152	11.066	32.5797	24.5878	-0.024658	-0.0031739	0.092529	-18.73	16.9993	12.9468	0.34668	-0.086914	-0.038086
0.302	-3.689	90.41	269.84	-0.23779	0.23486	-0.10107	-11.8756	169.575	297.6056	-0.33057	0.25488	-0.054199	-1.096	0.14595	10.7601	0.02002	-0.026855	0.085449	-33.9671	5.4697	7.39	0.3334	-0.046972	-0.04375
0.304	5.598	98.224	223.1212	-0.20679	0.21778	-0.10034	-24.3523	106.199	257.4741	-0.29785	0.23779	-0.040527	-1.319	26.2831	27.5077	0.080566	-0.055664	0.071289	-51.2057	29.94	16.0711	0.31758	-0.014746	-0.048536
0.306	15.242	85.874	221.2954	-0.1792	0.20361	-0.099121	-39.16	63.72	235.637	-0.26953	0.21875	-0.038086	-4.898	-14.62619	43.574	0.12354	-0.081055	0.056396	-43.1963	22.958	32.2947	0.29258	0.015722	-0.059472
0.308	-12.235	71.636	208.5059	-0.15088	0.17529	-0.09668	-32.71509	88.8632	206.326	-0.25293	0.21094	-0.036133	-9.302	5.2	21.5524	0.16602	-0.10986	0.049316	-12.95	12.268	52.1324	0.26475	0.043653	-0.064746
0.31	-2.808	68.977	190.2771	-0.13281	0.16504	-0.093262	-56.381	41.4201	186.9221	-0.22266	0.19434	-0.029297	-24.918	-13.748	21.0605	0.2085	-0.14258	0.030273	-55.2374	-33.5756	64.217	0.23926	0.074707	-0.068359
0.312	-0.926000000000002	68.598	178.3315	-0.11084	0.14453	-0.088379	-33.7666	73.607	176.5015	-0.19531	0.1853	-0.02124	-6.052	24.5375	28.7405	0.23047	-0.16504	0.022949	-60.1425	-75.8463	63.9294	0.20557	0.093945	-0.072657
0.314	10.826	62.807	187.2999	-0.093018	0.13134	-0.089843	-27.2714	102.77	130.369	-0.17188	0.17334	-0.018555	12.666	10.351	26.4585	0.26416	-0.1958	0.010254	-58.0233	-73.1695	98.8362	0.16807	0.11953	-0.07793
0.316	-0.248000000000005	74.827	195.142	-0.087891	0.12061	-0.087891	-69.011	66.7957	106.643	-0.13086	0.15137	-0.018066	0.305	34.089	34.749	0.28638	-0.21777	-0.001709	-51.7049	-43.527	144.8216	0.12783	0.14492	-0.070899
0.318	-28.26	89.05	183.654	-0.074707	0.10547	-0.085449	-44.7854	121.247	104.2119	-0.11426	0.14404	-0.013184	-2.141	6.3699	21.1516	0.2959	-0.23926	-0.0097656	-45.531	-2.877	180.039	0.091506	0.16855	-0.07002
0.32	-11.194	97.958	173.198	-0.083008	0.10107	-0.096191	-44.49574	82.6178	85.9243	-0.07373	0.13037	-0.011719	-12.438	27.93376	10.5251	0.30713	-0.25098	-0.019531	-24.60852	-28.0643	211.017	0.049805	0.19189	-0.061035
0.322	-16.349	80.953	170.648	-0.088379	0.10498	-0.088379	-54.2324	68.186	104.4403	-0.050781	0.11597	-0.0063477	-6.019	3.537	5.24439	0.30615	-0.25684	-0.021484	-34.341	-24.558	258.502	0.011133	0.21524	-0.050097
0.324	-16.724	60.809	160.34	-0.055908	0.090576	-0.053223	-47.3114	87.93	75.608	-0.018555	0.10645	-0.0073242	-21.324	29.0599	11.3239	0.31055	-0.25781	-0.027344	-66.779	-34.8794	346.503	-0.031348	0.23701	-0.033789
0.326	-19.271	63.521	125.6271	-0.020508	0.061523	-0.029297	-53.138	16.92	51.2319	0.017578	0.09082	-0.0058594	-5.102	14.464196	-1.1995	0.2998	-0.25488	-0.033936	-11.334	16.9437	507.2956	-0.068067	0.26006	-0.025586
0.328	-2.69	65.701	100.3082	-0.0039063	0.034668	-0.018555	-37.0294	42.531	45.335	0.032715	0.083496	-0.0029297	3.523	41.111	9.083	0.29102	-0.24561	-0.038574	-28.442	72.975	645.879	-0.096095	0.2793	-0.017968
0.33	-17.718	61.271	94.6221	-0.0092773	0.029297	-0.020508	-12.423	75.559	12.38746	0.063965	0.066406	0.00097656	29.056	18.9422	0.86299	0.26709	-0.22705	-0.044922	-9.7905	91.073	761.658	-0.12354	0.29688	-0.0048828
0.332	-26.568	64.46	109.968	-0.01123	0.021484	-0.026855	12.794	27.596	7.878	0.082276	0.05249	-0.003418	-20.691	28.2153	23.1268	0.2583	-0.2124	-0.045898	-21.917	90.634	869.516	-0.14473	0.31465	0.00058594
0.334	-5.542	58.625	90.729	-0.023437	0.019775	-0.028077	20.951	66.086	0.289000000000001	0.10059	0.038086	-0.0039063	-21.848	-3.2807	-9.974	0.22412	-0.17871	-0.053223	-38.06	35.244	946.713	-0.15615	0.33047	0.0077148
0.336	-17.857	48.999	87.6365	-0.029785	0.018066	-0.020996	2.706	22.4527	-0.428999999999998	0.11133	0.020996	-0.003418	-8.027	21.1709	6.43283	0.19824	-0.15381	-0.055908	-5.7727	16.559	1070.384	-0.16006	0.34336	0.0077148
0.338	-8.8	37.2214	99.947	-0.02832	0.022949	-0.013672	31.7189	5.813	16.632	0.11865	0.0097656	-0.003418	23.838	27.15318	1.4694	0.1709	-0.125	-0.056641	1.1965	-11.574	1160.953	-0.15722	0.35078	0.010644
0.34	-14.923	48.0777	90.449	-0.032227	0.026855	-0.012695	56.26	38.3836	10.4628	0.11816	-0.0039063	0.0024414	16.483	35.798	41.898231	0.12305	-0.077148	-0.067871	22.0237	-36.703	1217.325	-0.15283	0.35938	0.012207
0.342	0.192	59.523	69.632	-0.026367	0.032227	-0.0087891	65.472	-3.8214	25.5833	0.11816	-0.020507	0.008789	22.9	19.9487	31.764	0.099121	-0.054199	-0.067871	34.35783	-101.124	1198.396	-0.14434	0.36074	0.017188
0.344	-20.166	60.331	60.1518	-0.026855	0.033936	-0.0061035	49.845	33.353	48.772	0.1167	-0.028809	0.01416	3.087	20.5843	33.447	0.052734	-0.014648	-0.074219	72.6068	-176.17582	1128.238	-0.13272	0.35752	0.019532
0.346	9.956	50.122	60.4116	-0.024902	0.039063	-0.0083008	25.3218	47.595	13.1253	0.1123	-0.047852	0.020996	-13.871	39.407	-16.843	0.018067	0.015869	-0.078125	85.32	-226.804	1113.603	-0.12295	0.34697	0.023047
0.348	6.08	45.662	61.143	-0.019531	0.034668	-0.00048828	30.36	17.3027	16.050988	0.11328	-0.049316	0.024414	-13.505	35.2063	30.747	-0.017578	0.041992	-0.085938	109.914	-281.047	1110.891	-0.11983	0.32998	0.027246
0.35	6.419	39.252	41.3859	-0.017578	0.030762	-0.010742	30.789	68.097	20.2768	0.1167	-0.064453	0.030273	6.358	43.761	7.287	-0.05957	0.080078	-0.092773	118.084	-263.456	1113.677	-0.11084	0.31201	0.025391
0.352	7.07	31.523	50.178	-0.013184	0.031738	-0.0048828	19.47	27.57	19.77514	0.1211	-0.07251	0.032471	-15.911	23.9393	34.958	-0.081543	0.094238	-0.09375	126.67	-282.792	1092.4682	-0.10352	0.28916	0.026758
0.354	7.029	41.71	54.596	-0.0092773	0.025635	-0.0031739	32.094	18.44885	39.6382	0.12891	-0.075684	0.032227	10.329	36.509	9.9688	-0.11768	0.12598	-0.10107	101.272	-252.323	1076.524	-0.095801	0.26611	0.025293
0.356	18.388	31.1894	46.1421	-0.0097656	0.021484	-0.0014648	35.0848	36.3171	12.7897	0.14111	-0.07959	0.039551	-5.034	1.7691	45.03	-0.14722	0.14869	-0.10474	45.983	-262.0384	1121.103	-0.085254	0.24697	0.025293
0.358	17.853	24.5993	31.6832	-0.013672	0.016113	-0.00097656	-7.36	-5.858	6.9791	0.15186	-0.081543	0.037109	-12.993	8.12	64.019	-0.16943	0.17334	-0.10742	46.168	-255.106	1177.0176	-0.070703	0.2252	0.019629
0.36	6.593	6.1056	31.284	-0.014648	0.013672	-0.0029297	-1.571	15.9779	38.793	0.17188	-0.080566	0.033691	-39.1235	-43.307	122.185	-0.19287	0.19971	-0.10693	16.151	-214.618	1193.722	-0.061523	0.20068	0.0092773
0.362	-6.922	5.8196	23.115	-0.016113	0.0097656	-0.0048828	-5.049	24.5871	19.4685	0.19092	-0.082764	0.033203	-2.486	-15.185	96.388	-0.20166	0.20752	-0.11182	41.179	-194.935	1252.364	-0.055371	0.18369	-0.0079101
0.364	4.697	30.252	14.5209	-0.014892	0.0070801	-0.0024414	-37.8703	9.4301	36.4123	0.20947	-0.081543	0.030273	-20.881	-33.914	147.323	-0.20801	0.22266	-0.12109	40.0384	-162.812	1277.86629	-0.065821	0.16006	-0.024707
0.366	6.988	31.615	27.102	-0.014648	0.0043945	-0.0092773	-5.604	59.674	31.0004	0.23389	-0.08252	0.022949	12.135	-17.036	194.2254	-0.20556	0.22925	-0.13428	26.541	-198.114	1329.23	-0.093555	0.14912	-0.043848
0.368	-12.677	28.7429	31.2635	-0.0092773	0.0019531	-0.011719	-25.8232	23.6189	13.0059	0.24414	-0.083984	0.019043	5.855	-51	240.0375	-0.20459	0.22998	-0.14404	74.175	-205.93	1362.5601	-0.14414	0.14414	-0.05127
0.37	11.73	16.8031	48.504	-0.0029297	0.003418	-0.0092773	-70.043	9.8574	28.5867	0.26416	-0.08252	0.0068359	0.298999999999999	-32.558	284.416	-0.18701	0.22461	-0.16748	75.265	-276.455	1374.775	-0.21729	0.14209	-0.056641
0.372	9.218	23.515	14.85338	0.0073242	0.00097656	-0.018066	-44.6482	26.5866	22.2757	0.27759	-0.086914	-0.0065919	-17.939	-46.6677	348.5825	-0.17432	0.22363	-0.18018	41.633	-293.261	1394.451	-0.32022	0.14024	-0.061524
0.374	-7.105	15.2055	18.7467	0.015137	0.0029297	-0.024903	-56.9871	-12.6779	14.0388	0.28125	-0.086426	-0.02002	22.295	29.6217	442.683	-0.14746	0.20605	-0.20703	24.736	-336.996	1445.94	-0.43838	0.1375	-0.064746
0.376	-9.183	25.2925	32.6674	0.029297	0.0029297	-0.03125	-28.117	8.723	42.572	0.29932	-0.087402	-0.029785	-0.117000000000004	33.589	560	-0.12719	0.19384	-0.22071	-10.458	-330.91	1482.022	-0.56728	0.13555	-0.06709
0.378	-9.243	22.8057	26.468	0.042969	3.4694e-14	-0.046875	-21.989	6.7488	24.631	0.31445	-0.09375	-0.028809	10.021	116.873	679.1407	-0.10449	0.17969	-0.24121	-10.317	-304.286	1515.6643	-0.70137	0.13486	-0.074317
0.38	-0.863	17.0923	4.8555	0.054688	0.0048828	-0.047852	-38.316	-16.8999	21.4041	0.33008	-0.10938	-0.032715	9.193	97.744	779.00149	-0.077637	0.14697	-0.27979	31.116	-284.129	1561.7914	-0.8374	0.13281	-0.087402
0.382	-20.811	10.6825	-4.02566	0.069336	0.0024414	-0.054199	-2.265	30.134	25.665	0.33619	-0.11499	-0.038574	1.67	110.848	864.032	-0.072266	0.13037	-0.29883	30.302	-218.1071	1568.166	-0.98299	0.13506	-0.10489
0.384	-11.166	11.91008	12.5736	0.082275	0.003418	-0.057861	2.665	20.6739	2.09336	0.33105	-0.11865	-0.053711	-29.763	23.0565	933.4447	-0.057129	0.10352	-0.34131	1.837	-206.3707	1585.8619	-1.1366	0.14268	-0.11504
0.386	-2.491	18.4347	25.54	0.095703	0.0019531	-0.061035	4.043	10.2112	34.398	0.3291	-0.12598	-0.062988	24.409	12.22	1016.783	-0.056885	0.096191	-0.36279	12.532	-95.249	1598.7589	-1.3085	0.16025	-0.12402
0.388	6.284	30.116	31.148	0.10791	0.0087891	-0.070801	6.128	26.8507	14.032	0.32471	-0.12842	-0.061035	62.578	-64.811	1055.902	-0.065918	0.084961	-0.39404	31.427	-50.344	1629.765	-1.4957	0.19356	-0.12295
0.39	-32.935	24.1251	31.885	0.11816	0.0068359	-0.071289	6.955	-14.6863	2.6477	0.30566	-0.12988	-0.072266	111.166	-58.379	1067.951	-0.10938	0.095703	-0.41895	72.9398	11.613	1661.499	-1.6987	0.24609	-0.11133
0.392	-1.207	14.0295	31.6641	0.12939	0.011719	-0.080566	30.986	0.3827	13.36719	0.2981	-0.12354	-0.071533	99.848	-137.803	1049.241	-0.14209	0.10449	-0.42822	75.9958	15.143	1658.227	-1.9025	0.30986	-0.096581
0.394	13.655	11.782516	22.1386	0.13648	0.01709	-0.082276	49.6919	14.6658	15.637	0.28564	-0.12109	-0.073242	49.287	-153.9868	1021.164	-0.23877	0.13428	-0.44531	64.175	-14.54	1624.495	-2.0851	0.37373	-0.073633
0.396	-1.878	22.5177	14.7011	0.14746	0.02002	-0.087891	24.191	-10.92779	32.6023	0.26367	-0.1084	-0.080078	16.0785	-239.453	1020.5811	-0.33032	0.16675	-0.45801	33.598	-12.377	1609.9432	-2.2581	0.43427	-0.070899
0.398	-0.527000000000001	30.0265	12.00083	0.15771	0.032715	-0.09375	38.7417	30.0507	33.8013	0.25342	-0.10156	-0.078613	20.1315	-205.56	1051.3602	-0.43164	0.19922	-0.46484	-5.514	-54.898	1620.0845	-2.4025	0.50088	-0.082813
0.4	16.653	35.058	20.8435	0.16016	0.040527	-0.093262	30.7692	22.5358	-7.9214	0.23877	-0.088379	-0.07959	31.4154	-227.469	1090.1853	-0.57129	0.24609	-0.47461	-24.8824	-49.403	1639.7747	-2.5195	0.58105	-0.094727
0.402	3.398	29.3	13.3202	0.16162	0.044922	-0.092285	44.9724	13.7767	13.5009	0.22412	-0.070801	-0.084717	-1.2892	-182.832	1148.751	-0.6499	0.2666	-0.48193	-3.36	-97.066	1661.004	-2.5884	0.68252	-0.10176
0.404	-10.397	29.0627	2.7942	0.16552	0.05835	-0.094971	66.659	43.348	-1.2942	0.21436	-0.058105	-0.085449	-18.5145	-220.839	1151.869	-0.83301	0.31396	-0.50342	11.4925	-95.968	1636.747	-2.6285	0.78486	-0.10479
0.406	11.627	9.9636	40.149	0.1626	0.070801	-0.097656	17.824	-15.6375	2.514	0.19678	-0.042969	-0.087402	-56.322	-203.838	1190.805	-0.98927	0.36914	-0.5127	24.149	-108.04	1634.63	-2.6468	0.88213	-0.10674
0.408	1.645	18.462	41.492	0.15723	0.088867	-0.092285	26.303	12.8432	6.7467	0.19238	-0.03418	-0.087891	-24.906	-212.309	1223.253	-1.1602	0.42969	-0.50977	11.127	-76.655	1658.687	-2.6619	0.96465	-0.11738
0.41	5.865	35.867	19.489	0.15039	0.10327	-0.094727	25.0078	39.1691	-19.8231	0.17334	-0.012695	-0.083496	-12.833	-145.718	1278.304	-1.3706	0.51025	-0.43311	19.384	-21.2173	1657.817	-2.6597	1.0181	-0.13428
0.412	18.906	35.421	20.9544	0.14307	0.11914	-0.098633	-23.237	-1.8533	4.256	0.156	0.0014649	-0.087647	12.255	-107.51	1322.952	-1.4585	0.55518	-0.34912	34.354	-31.8306	1667.057	-2.6563	1.0371	-0.16035
0.414	-5.027	28.085	21.1268	0.12842	0.1416	-0.091309	24.618	41.159	32.6698	0.14648	0.013672	-0.085938	-1.601	-89.294	1364.231	-1.875	0.68652	-0.35791	33.3224	-4.854	1623.559	-2.6433	1.0176	-0.18985
0.416	10.19	22.2836	21.8875	0.12207	0.15186	-0.091309	-19.094	17.5667	9.09	0.12354	0.035645	-0.078613	3.77	-132.683	1341.6488	-2.1941	0.83032	-0.34204	42.22	-26.3131	1584.204	-2.598	0.97384	-0.19609
0.418	13.809	24.3359	12.2774	0.10986	0.17871	-0.09082	-32.231	12.2513	22.1086	0.10986	0.039551	-0.075684	-8.901	-196.042	1357.723	-2.5137	0.96484	-0.32227	32.834	25.9926	1561.534	-2.5609	0.89102	-0.19395
0.42	11.734	23.24051	8.7443	0.1001	0.19751	-0.084717	-22.796	62.81	12.448	0.081543	0.057129	-0.06543	-6.312	-241.3591	1381.885	-2.834	1.1621	-0.2876	12.945	61.279	1505.1071	-2.5396	0.79736	-0.19971
0.422	-18.713	23.49707	54.89	0.09082	0.21875	-0.078125	-58.892	19.4793	1.5252	0.064697	0.06836	-0.05835	-22.281	-273.477	1446.7134	-2.9116	1.2427	-0.2832	-7.947	99.266	1455.857	-2.5362	0.71552	-0.19756
0.424	-1.45	11.9833	99.869	0.081543	0.23828	-0.070313	-40.8136	25.2224	22.947	0.043457	0.081543	-0.052246	-49.591	-244.311	1481.101	-2.9043	1.334	-0.29297	1.752	115.36	1397.862	-2.5589	0.64951	-0.20596
0.426	6.763	-11.506	106.5947	0.078125	0.25098	-0.065918	-31.905	33.4235	-14.0655	0.019043	0.09668	-0.04248	-86.934	-259.095	1488.469	-2.7449	1.2439	-0.33227	-9.42299999999999	98.3081	1385.368	-2.6073	0.60732	-0.22002
0.428	-1.967	-5.588	138.1658	0.068359	0.271	-0.062988	-45.5639	4.66	4.2009	0.0058594	0.10547	-0.039063	-35.442	-206.701	1496.6145	-2.4316	0.99805	-0.39697	12.642	120.314	1368.859	-2.6622	0.59795	-0.24228
0.43	-9.28	5.114	182.4338	0.059082	0.28076	-0.071533	-20.793	47.7719648	31.2317	-0.013672	0.11719	-0.023926	-10.519	-221.504	1563.827	-1.8828	0.88672	-0.52637	15.133	110.517111	1395.976	-2.7188	0.62451	-0.26855
0.432	-52.1132	19.2026	247.4799	0.046875	0.28955	-0.078125	-27.3282	20.9755	21.1023	-0.028565	0.12402	-0.019043	9.518	-147.463	1552.413	-1.8062	1.0142	-0.61572	14.643	150.558	1370.72532	-2.7644	0.67969	-0.29453
0.434	-50.424	5.977	296.7091	0.021484	0.29834	-0.090332	-47.0009	20.8525	31.4999	-0.046387	0.13135	-0.013184	32.912	-146.558	1577.917	-2.0229	1.2368	-0.64795	18.164	150.251	1331.05	-2.8	0.75263	-0.3128
0.436	-81.819	-12.518	315.778	0	0.30566	-0.10059	-0.619	58.965	28.862	-0.063477	0.13721	-0.0024414	98.068	-68.95	1585.558	-2.1528	1.2993	-0.55811	-0.946000000000005	168.126	1303.248	-2.8356	0.82178	-0.33584
0.438	-75.375	-64.512	355.53299	-0.048828	0.31006	-0.12402	0.500999999999998	20.7079	8.81245	-0.073242	0.14307	0	92.077	-79.857	1620.811	-2.2202	1.2642	-0.53662	27.812	167.11	1287.051	-2.874	0.88652	-0.36699
0.44	-63.148	-101.0896	411.043	-0.10083	0.31299	-0.13257	3.033	33.6351	49.864	-0.086426	0.15332	0.01123	136.0004	-27.729	1576.561	-2.2051	1.1113	-0.62891	48.008	183.775	1306.648	-2.916	0.95898	-0.38965
0.442	-43.5802	-97.6003	448.25	-0.16895	0.31494	-0.13916	11.993	24.284	14.0953	-0.09668	0.16089	0.018555	163.387	-83.11	1579.558	-2.1387	1.0254	-0.65918	59.7578	200.614	1278.381	-2.9596	1.0119	-0.41777
0.444	-66.612	-53.746	472.328	-0.28076	0.31738	-0.14844	-7.245	-3.4874	11.2978	-0.10938	0.16748	0.023926	139.679	-46.606	1550.604	-1.9448	0.83838	-0.66357	60.9753	163.20884	1243.651	-3.0012	1.0578	-0.43232
0.446	-21.134	-10.488	458.3719	-0.34766	0.32129	-0.14893	30.212	40.4961	32.4885	-0.11621	0.17871	0.03125	71.618	-110.9867	1560.225	-1.8956	0.66894	-0.65429	49.3442	177.697	1191.934	-3.034	1.0977	-0.43506
0.448	-3.771	15.6034	474.524	-0.48877	0.33447	-0.14307	46.2505	9.8999	35.946	-0.12793	0.18506	0.035156	73.99	-48.2997	1526.361	-1.9434	0.55762	-0.63086	24.554	157.9955	1160.914	-3.0631	1.1275	-0.43535
0.45	-46.418	28.053	520.373	-0.60864	0.34716	-0.1294	33.518	13.3387	44.062	-0.1377	0.19531	0.040527	91.419	-87.672	1565.624	-2.1289	0.63477	-0.64453	40.277	193.893	1146.002	-3.0859	1.1582	-0.43066
0.452	-43.114	43.518	593.8964	-0.73193	0.36475	-0.11621	54.423706	15.4311	21.7721	-0.14209	0.20142	0.049561	120.598	-41.089	1565.809	-2.2358	0.70166	-0.63037	26.866	212.354	1089.478	-3.0874	1.1845	-0.42803
0.454	4.33	55.8068	633.591	-0.90039	0.39355	-0.094238	33.385	1.5814	3.7764	-0.14307	0.21436	0.050293	119.069	-111.063	1580.722	-2.4063	0.83008	-0.62402	56.431	226.7741	1047.289	-3.0739	1.2015	-0.42226
0.456	10.685	62.366	661.319	-0.98193	0.41455	-0.09375	49.5548	25.3172	31.857	-0.15527	0.22461	0.055664	91.687	-52.279	1537.706	-2.5202	0.93383	-0.66577	45.706	259.76	988.957	-3.0535	1.214	-0.41992
0.458	-14.14	41.2846	690.368	-1.1401	0.47119	-0.094238	48.6946	21.8808	15.6195	-0.15332	0.23145	0.058105	93.4097	-85.859	1558.212	-2.6147	1.02	-0.69482	31.413	264.303	947.544	-3.0203	1.2223	-0.42051
0.46	-25.89	22.498	713.533	-1.2534	0.52002	-0.10425	12.143	-15.6666	17.4759	-0.15137	0.24219	0.055176	110.006	-6.461	1572.173	-2.7031	1.1377	-0.69531	37.294	279.397	929.652	-2.978	1.2251	-0.42383
0.462	-24.627	17.046	707.8262	-1.3574	0.5791	-0.12109	34.403	13.0278	45.91	-0.14453	0.24536	0.056885	105.4888	-27.282	1584.659	-2.7339	1.1958	-0.70459	60.445	256.22	889.663	-2.9154	1.2111	-0.41582
0.464	-2.81	8.553	688.399	-1.457	0.66211	-0.13379	8.876	0.877	35.258	-0.13867	0.24951	0.054688	105.256	54.8215	1522.4704	-2.7402	1.291	-0.73242	47.077	263.874	835.413	-2.8425	1.1841	-0.41064
0.466	38.1045	-35.551	706.168	-1.4922	0.70898	-0.1416	7.074	-28.7968	101.374	-0.12842	0.25049	0.040527	75.761	14.2894	1514.614	-2.6811	1.3081	-0.76172	52.522	243.6577	785.427	-2.7632	1.1532	-0.39853
0.468	41.564	-73.1647	743.9033	-1.5293	0.79102	-0.15332	23.027	-36.267	154.59	-0.125	0.24316	0.026367	11.476	72.98	1474.335	-2.584	1.3027	-0.80078	35.191	248.0027	730.9787	-2.6812	1.1074	-0.37832
0.47	27.7499	-104.852	760.477	-1.5349	0.83935	-0.15454	-48.23462	-89.8604	185.072	-0.12207	0.23242	0	2.272	50.069	1452.008	-2.416	1.3145	-0.84668	48.199	238.3696	698.1929	-2.5996	1.0527	-0.35352
0.472	33.4449	-130.139	787.442	-1.5229	0.87744	-0.15381	-36.327	-93.917	264.388	-0.13111	0.22631	-0.030762	-5.42599999999999	111.571	1429.936	-2.3511	1.3228	-0.86084	43.105	213.2026	657.069	-2.5256	1.0021	-0.32685
0.474	27.274	-145.9637	828.054	-1.499	0.90625	-0.17188	-61.043	-94.748	328.2906	-0.1543	0.21875	-0.060059	0.731000000000002	64.068	1398.481	-2.2847	1.3188	-0.87158	45.168	197.405	590.375	-2.4546	0.954	-0.30518
0.476	14.806	-149.2731	868.814	-1.4819	0.91064	-0.17236	-114.394	-142.009	400.194	-0.2207	0.21582	-0.10059	-11.791	99.103	1379.4892	-2.2566	1.2776	-0.87378	52.762	174.295	539.487	-2.3901	0.91221	-0.28564
0.478	-4.36	-136.673	903.37	-1.4438	0.89111	-0.17627	-95.794	-128.127	447.08	-0.26807	0.22119	-0.11084	9.763	71.337	1358.523	-2.2202	1.2134	-0.86963	39.323	210.6182	504.1662	-2.3226	0.87461	-0.26465
0.48	-5.233	-124.551	901.2288	-1.4063	0.84571	-0.1731	-132.07	-159.4492	437.02528	-0.38281	0.21436	-0.12695	-10.55	133.962	1321.998	-2.1465	1.0996	-0.87305	76.222	213.157	486.643	-2.2539	0.83691	-0.24854
0.482	-13.1287	-108.255	921.5081	-1.3652	0.78125	-0.16357	-123.677	-166.5551	486	-0.48731	0.21119	-0.13819	34.733	119.456	1299.392	-2.1084	1.0391	-0.87305	47.561	227.791	461.3658	-2.1732	0.79814	-0.23017
0.484	-15.7124	-105.3756	964.57795	-1.3081	0.67041	-0.14453	-102.74	-81.547	538.482	-0.60156	0.20752	-0.14551	29.512	150.172	1315.52227	-2.0391	0.92969	-0.86719	54.635	203.4824	413.1403	-2.0878	0.75586	-0.21631
0.486	-43.5536	-110.98	996.395	-1.2847	0.61328	-0.1377	-97.496	-71.6756	574.239	-0.77295	0.2124	-0.16504	44.618	114.628	1294.8863	-2.0269	0.82275	-0.8374	52.134	187.6166	368.048	-1.9925	0.71133	-0.20186
0.488	-48.3338	-129.124	992.8188	-1.2612	0.50928	-0.12891	-26.609	-35.14	585.422	-0.86182	0.21289	-0.16797	39.067	121.826	1288.24	-2.0288	0.80322	-0.82959	39.214	222.291	312.169	-1.8936	0.66338	-0.19658
0.49	-53.082	-119.714	1008.0856	-1.2664	0.45337	-0.12183	-22.273	3.84399999999999	586.739	-1.0444	0.2251	-0.18262	59.151	105.533	1251.8833	-2.0273	0.83984	-0.8252	46.407	228.721	308.615	-1.7944	0.6167	-0.18506
0.492	-33.6989	-106.276	1032.3259	-1.2813	0.4082	-0.11865	-83.0463	-3.082	642.626	-1.1907	0.24633	-0.18921	52.281	134.932	1233.993	-2.0014	0.85889	-0.80615	60.711	258.077	270.1404	-1.6928	0.57158	-0.16787
0.494	-36.8474	-92.697	1060.684018	-1.3198	0.37744	-0.10889	-15.821	35.446	708.3684	-1.3398	0.28271	-0.20215	67.019	133.8455	1180.7195	-1.9609	0.86523	-0.79688	65.001	219.538	252.634	-1.5973	0.52031	-0.16054
0.496	-35.998	-85.22	1096.4909	-1.3496	0.37598	-0.11182	-8.9111	22.194	729.8788	-1.5605	0.36328	-0.21484	49.914	133.808	1152.287	-1.9038	0.85693	-0.77686	46.158	199.555	207.8105	-1.5039	0.47305	-0.15234
0.498	-26.128	-87.94	1127.0804	-1.418	0.39551	-0.11914	1.817	16.149	782.5	-1.6738	0.4248	-0.22461	45.169	117.784	1092.964	-1.8784	0.84814	-0.76123	57.075	173.944	160.8061	-1.4193	0.42246	-0.14512
0.5	-44.6968	-82.907	1144.433	-1.4736	0.42822	-0.12793	32.008	24.634	815.753	-1.8979	0.57471	-0.24268	64.813	130.49	1067.156	-1.8398	0.82617	-0.72656	34.544	174.117	175.3728	-1.3301	0.375	-0.13525
0.502	-78.4281	-83.722	1182.5886	-1.5288	0.47314	-0.13867	-1.286	-18.481	841.2958	-2.038	0.69336	-0.25293	95.7701	151.5853	1032.031	-1.8057	0.81006	-0.69922	38.594	183.208	181.631	-1.2566	0.32705	-0.12568
0.504	-64.5897	-106.7782	1241.282	-1.5913	0.53955	-0.1582	20.014	-56.885	881.434	-2.1445	0.80957	-0.26953	78.1378	179.428	1000.751	-1.7749	0.79541	-0.6792	29.851	170.788	162.057	-1.178	0.27744	-0.11895
0.506	-14.213	-120.87739	1276.365	-1.6226	0.57275	-0.16748	44.5433	-77.52	851.522	-2.228	0.94385	-0.28711	76.4092	198.907	944.883	-1.728	0.78076	-0.65283	16.184	141.495	120.213	-1.1003	0.22901	-0.11308
0.508	-7.14	-105.9328	1278.376	-1.6895	0.63672	-0.18555	78.002	-149.5254	904.399	-2.2363	1.002	-0.30273	60.029	207.137	903.9864	-1.7056	0.77588	-0.64404	19.643	91.3294	119.498	-1.0239	0.17763	-0.10302
0.51	-2.094	-93.89508	1264.7669	-1.7371	0.67895	-0.20337	126.874	-177.565	997.825	-2.1792	1.0942	-0.31982	46.179	243.91	855.962	-1.6567	0.7749	-0.61182	12.218	103.122	117.968	-0.94629	0.12891	-0.09375
0.512	-15.434	-91.4836	1278.6658	-1.7891	0.7207	-0.22217	77.4893	-207.008	1010.753	-2.043	1.1309	-0.33984	69.1296	233.092	833.983	-1.6179	0.77466	-0.573	16.523	59.222	130.634	-0.87149	0.085939	-0.088281
0.514	14.384	-74.349	1314.071	-1.8677	0.76025	-0.25635	57.95	-244.572	1066.835	-1.9629	1.127	-0.354	54.1514	254.223	802.4114	-1.5737	0.77393	-0.55029	8.52199999999999	61.15	111.254	-0.80381	0.045312	-0.080957
0.516	4.499	-41.826	1322.0174	-1.8984	0.7832	-0.26855	98.1002	-234.964	1106.124	-1.7949	1.0781	-0.36426	34.924	226.083	792.232	-1.5098	0.76758	-0.52051	17.172	35.0441	71.652	-0.73818	0.0054688	-0.084082
0.518	19.217	-34.713	1315.6242	-1.9746	0.82227	-0.2876	18.475	-248.624	1143.539	-1.6845	1.0029	-0.37133	-17.043	232.152	713.5587	-1.4683	0.76025	-0.50146	10.18	2.594	47.979	-0.67813	-0.028906	-0.086914
0.52	30.0075	-60.3993	1342.933	-2.0457	0.85962	-0.31421	24.896	-240.065	1229.195	-1.5991	0.90088	-0.36865	-71.0721	192.784	690.219	-1.3926	0.74805	-0.47168	5.913	10.7787	34.248	-0.61719	-0.058594	-0.085938
0.522	8.294	-64.062	1341.167	-2.1289	0.9043	-0.34668	53.035	-175.7247	1218.1327	-1.5313	0.74219	-0.35352	-64.2528	220.2652	622.589914	-1.3396	0.73413	-0.44507	9.787	-10.6889	35.05	-0.55791	-0.088379	-0.093262
0.524	-14.6948	-30.3737	1332.7288	-2.2207	0.97852	-0.37793	-0.654	-160.5265	1237.1188	-1.5117	0.66797	-0.34668	-34.101	181.568	576.4767	-1.2852	0.71875	-0.42041	-37.807345	-2.2217	-3.245	-0.49971	-0.11348	-0.10302
0.526	-17.3193	-1.9055	1320.696	-2.2637	1.0234	-0.37988	31.113	-139.14	1297.451	-1.5137	0.54883	-0.32813	-47.5203	218.6907	536.1289	-1.2124	0.6958	-0.3916	-19.922	-20.8212	4.49345	-0.45518	-0.13145	-0.11787
0.528	-11.856	7.4702	1327.764	-2.3418	1.0996	-0.41016	-9.534	-103.547	1285.6423	-1.5454	0.48511	-0.31177	-70.814	184.605	493.68872	-1.1797	0.68945	-0.37402	-9.044	-6.700713	-9.3379	-0.41231	-0.14727	-0.12851
0.53	-15.8584	2.137	1339.4009	-2.3882	1.1616	-0.42016	-4.80399999999999	-96.62	1330.9268	-1.605	0.44775	-0.30322	-78.19	238.907	462.2246	-1.1074	0.66992	-0.34277	-21.488	6.0222	5.4878	-0.36377	-0.15576	-0.12793
0.532	-22.902088	0.0449999999999982	1346.8427	-2.4199	1.2168	-0.43164	34.536	-57.357	1359.645	-1.7266	0.4375	-0.28955	-58.4929	187.742	458.158	-1.0615	0.6499	-0.3169	2.292	24.2603	22.5599	-0.30117	-0.17989	-0.11475
0.534	-35.9228	-14.389	1350.809	-2.4414	1.2813	-0.43311	-30.908	-52.826	1355.0174	-1.7988	0.44824	-0.29297	-64.8996	225.979	407.631	-1.0176	0.62695	-0.29102	10.624	18.167	-0.782	-0.24082	-0.20674	-0.1043
0.536	-28.791	-9.109	1375.995	-2.4468	1.2993	-0.43506	-22.739	-109.262	1421.694	-1.9487	0.51611	-0.29443	-37.5728	183.053	411.792	-0.95068	0.61963	-0.25928	-14.087	14.0502	1.7677	-0.18691	-0.23291	-0.10351
0.538	-29.643	-7.736	1385.933	-2.4429	1.3286	-0.42725	-34.8363	-78.11	1420.35845	-2.0554	0.59058	-0.30566	-56.0722	235.923	372.862	-0.91357	0.61865	-0.24023	-19.052	29.102	0.9076	-0.15381	-0.2542	-0.11084
0.54	-41.892	-7.548	1355.4709	-2.4295	1.3362	-0.42236	-69.708	-106.2532	1452.734	-2.1621	0.67188	-0.31152	-47.541	195.005	337.049	-0.8457	0.60156	-0.2085	12.741	36.769	-0.153600000000001	-0.12207	-0.2666	-0.11475
0.542	-63.559	-8.6607	1326.37391	-2.4253	1.3325	-0.41162	-52.3071	-132.876	1506.2211	-2.2866	0.77979	-0.32031	-54.9053	221.4	305.7671	-0.79028	0.58911	-0.19409	-2.329	65.977	-0.102999999999998	-0.090819	-0.27969	-0.10742
0.544	-61.708	-16.40398	1327.7948	-2.4194	1.3286	-0.40283	-90.038	-117.9804	1508.814	-2.3506	0.83301	-0.32861	-58.788	142.9897	273.572	-0.7373	0.57227	-0.17188	35.122	17.2569	20.7424	-0.068262	-0.29521	-0.1086
0.546	-71.07	-17.1736	1347.239	-2.4141	1.3145	-0.39111	-63.6642	-141.025	1552.726	-2.4668	0.93359	-0.33301	-33.885	179.24	239.566	-0.66064	0.5542	-0.15137	4.364	16.7275	2.6394	-0.062402	-0.29756	-0.10899
0.548	-99.488	-8.458	1353.447	-2.3921	1.2876	-0.3667	23.65	-107.88	1585.673	-2.5608	1.0076	-0.34742	3.184	106.376	214.0416	-0.62646	0.54541	-0.14258	-33.06	9.616	2.892	-0.049805	-0.29688	-0.10127
0.55	-98.896	-8.0274	1343.5	-2.375	1.2617	-0.35889	-1.2302	-89.592	1565.222	-2.6519	1.0728	-0.36475	9.79	134.6821	177.173	-0.54834	0.51611	-0.12744	13.287	37.3848	31.3546	-0.049316	-0.2998	-0.098145
0.552	-93.062	4.427	1329.421	-2.3555	1.2246	-0.34766	19.8166	-125.105	1611.148	-2.7612	1.1411	-0.37842	28.9044	80.526	162.661	-0.49463	0.49609	-0.11719	44.8326	61.008	33.851	-0.046973	-0.30293	-0.092871
0.554	-97.679	26.7079	1316.879	-2.3193	1.1816	-0.33398	22.3847	-76.56298	1590.578	-2.8066	1.166	-0.37109	33.46	122.486	159.012	-0.44727	0.47363	-0.10547	21.15	45.342	55.3031	-0.050293	-0.30567	-0.09082
0.556	-77.729	49.482	1293.7915	-2.3003	1.1558	-0.32324	-13.659	-86.1041	1566.368	-2.8867	1.21	-0.37598	55.9623	45.37792	128.8008	-0.38086	0.43555	-0.088867	16.2257	42.548	36.464	-0.065137	-0.30332	-0.089648
0.558	-78.537	53.276	1285.78	-2.2612	1.1118	-0.31006	30.443	-75.8564	1586.7119	-2.9343	1.2268	-0.38257	54.534	78.081	108.0003	-0.35205	0.41602	-0.080078	23.245	12.4949	25.4332	-0.08086	-0.29648	-0.08916
0.56	-46.4429	55.392	1273.7573	-2.2351	1.0833	-0.30005	26.465	-13.997	1550.9211	-2.9707	1.2363	-0.38867	47.1873	33.919	94.2892	-0.30371	0.38086	-0.075195	-30.4396	36.039	21.1287	-0.095215	-0.28662	-0.089844
0.562	-68.221	52.454	1272.424	-2.2051	1.0547	-0.29297	31.989	-7.224	1546.5168	-2.9839	1.2349	-0.38818	23.459	100.195	79.822	-0.26977	0.3501	-0.053223	11.989	40.913	58.748	-0.11328	-0.28106	-0.091797
0.564	-58.439	45.509	1257.307	-2.1641	1.0234	-0.28223	55.651	23.89798	1555.8762	-2.98	1.229	-0.38818	54.4787	59.604	67.441	-0.24463	0.3208	-0.04541	23.727	33.913	57.582	-0.12344	-0.26524	-0.087304
0.566	-36.772	27.4462	1263.762	-2.1387	1.0059	-0.27539	-2.4149	61.288	1514.338	-2.9521	1.2012	-0.38574	40.068	94.124	41.3608	-0.22852	0.28906	-0.033691	12.286	6.259	33.7218	-0.13711	-0.24844	-0.086914
0.568	-31.0807	33.889	1254.774	-2.0894	0.979	-0.26709	31.8149	27.7644	1561.329	-2.9167	1.175	-0.38281	14.917	15.8813	22.2237	-0.22363	0.27637	-0.028809	-11.561	-20.6645	25.8507	-0.15059	-0.23193	-0.086817
0.57	-12.126435	43.286	1217.8992	-2.0499	0.96142	-0.26611	40.634	52.746	1554.173	-2.8804	1.147	-0.38428	1.005	24.3099	1.8867	-0.21631	0.25781	-0.016602	-6.019	2.2769	5.952	-0.16797	-0.21191	-0.084473
0.572	-24.9435	36.7871	1181.547	-2.0137	0.9375	-0.25977	1.672	29.486	1527.115	-2.8218	1.1079	-0.39014	-18.446	-26.029	-8.47	-0.2146	0.24511	-0.0061034	-1.312	2.7443	47.3056	-0.19121	-0.19346	-0.076269
0.574	-33.6248	34.371	1170.4787	-1.9648	0.91992	-0.26172	47.317	3.3734	1567.193	-2.7983	1.0864	-0.38721	-24.406	22.4527	19.53	-0.21094	0.22998	3.296e-14	-6.259	30.424	47.9404	-0.2127	-0.18086	-0.067383
0.576	-25.1845	29.0799	1168.2722	-1.9414	0.90234	-0.25781	20.181	51.66	1538.3085	-2.7573	1.0493	-0.38818	-14.55	3.889	2.93543	-0.19824	0.2168	0.015625	4.124	-5.475	21.926	-0.2295	-0.16133	-0.056055
0.578	7.2954	45.2672	1161.7	-1.896	0.87646	-0.25146	-25.184	23.93269	1563.3954	-2.7322	1.0232	-0.37719	-17.581	32.1832	0.109100000000001	-0.19629	0.20947	0.019043	-31.0489	-17.0111	-8.6491	-0.24444	-0.14736	-0.040234
0.58	10.0217	40.7551	1135.685	-1.8623	0.84717	-0.24902	1.5669	26.985	1585.1517	-2.7183	0.99463	-0.37646	-42.8457	1.625	-19.9986	-0.18164	0.18945	0.030762	-5.115	-29.8871	5.04	-0.26123	-0.13574	-0.019043
0.582	3.0369	54.122	1114.757	-1.8296	0.82275	-0.23877	-48.307	57.419	1531.416	-2.7026	0.96338	-0.3584	-71.6706	25.8822	-26.606	-0.17212	0.18261	0.039795	-1.983	-7.2082	32.223	-0.27168	-0.12432	-0.0018554
0.584	-1.507	61.507	1097.423	-1.7866	0.78076	-0.23291	-50.0724	28.982	1551.018	-2.6948	0.95166	-0.34912	-31.6192	18.491	2.5528	-0.15479	0.16943	0.046387	-11.863	21.6057	18.0174	-0.27959	-0.1167	0.016504
0.586	-9.493	80.851	1076.3185	-1.7632	0.76318	-0.2251	-20.9733	86.4485	1532.102	-2.6758	0.93359	-0.33887	-51.895	34.92	44.321	-0.13525	0.15332	0.056641	11.503	5.208	11.61	-0.28545	-0.11279	0.031739
0.588	-22.3554	83.219	1046.3464	-1.7266	0.73047	-0.21484	-87.034	88.908	1479.199	-2.6489	0.92724	-0.33423	-38.3454	22.582	27.627	-0.12256	0.14453	0.051758	-9.982	16.2128	-14.6976	-0.28369	-0.10752	0.04707
0.59	-20.4111	80.596	1033.1281	-1.6777	0.70508	-0.2041	-52.95	63.7791	1501.143	-2.6147	0.92432	-0.3252	-41.962	26.6687	21.04	-0.10107	0.12598	0.057617	-11.094	0.0326699999999999	-8.3071	-0.27539	-0.10889	0.063477
0.592	-25.0565	81.1012	1006.4638	-1.6479	0.69385	-0.19922	-55.373	109.863	1443.0581	-2.5605	0.91406	-0.31641	-39.3683	18.2625	2.6939	-0.085938	0.11206	0.059082	-2.501	38.002	20.8342	-0.26856	-0.11143	0.072558
0.594	-47.8223	80.9756	985.331	-1.6016	0.67383	-0.19385	-66.872	88.347	1445.7125	-2.5313	0.91016	-0.31543	-54.686	24.5948	16.0711	-0.070801	0.095215	0.068359	25.28	38.934	22.018	-0.24931	-0.11807	0.082715
0.596	-62.866	80.493	964.232	-1.5569	0.65747	-0.19361	-25.5182	120.059	1441.715	-2.4683	0.89795	-0.31201	-19.55	49.189	30.83625	-0.056152	0.078613	0.063965	-12.7425	46.509	3.578	-0.22549	-0.12471	0.091699
0.598	-76.598	83.908	957.375	-1.5098	0.65039	-0.19141	-65.224	174.44	1376.1677	-2.4177	0.88305	-0.30835	-2.631	41.359	7.503	-0.053223	0.066895	0.071777	-0.329000000000001	27.787	-3.22737	-0.20244	-0.13574	0.098438
0.6	-58.568	94.235	929.5575	-1.4468	0.62744	-0.18799	-26.1205	156.718	1378.3974	-2.3711	0.86719	-0.30078	13.521	58.352	1.21	-0.048828	0.052246	0.072754	-6.516	11.7861	4.254	-0.18115	-0.15039	0.10547
0.602	-60.423	89.2545	890.5025	-1.4194	0.61377	-0.18115	1.824	186.188	1368.534	-2.3105	0.84863	-0.2959	34.09	17.6531	43.277	-0.047607	0.034424	0.081299	0.439	42.969	16.8312	-0.16778	-0.16201	0.11133
0.604	-61.902	90.0285	873.5119	-1.3633	0.58398	-0.17285	-56.357	156.707	1330.1242	-2.2754	0.83594	-0.2876	10.083	25.3425	11.3632	-0.052734	0.022461	0.087402	59.7694	32.589	40.321	-0.15254	-0.17539	0.12265
0.606	-59.621	94.971	868.498	-1.3218	0.56299	-0.16211	-3.196	100.9434	1341.598	-2.1992	0.81445	-0.28418	19.877	11.0149	27.2181	-0.061035	0.0087891	0.097656	25.5713	69.173	21.8541	-0.14317	-0.18242	0.13242
0.608	-58.27	103.221	851.106	-1.2852	0.53516	-0.1582	0.763999999999999	125.89773	1288.587	-2.1324	0.80176	-0.28345	55.5223	49.489	18.40548	-0.0625	0.0019531	0.10498	22.5929	29.7989	19.5861	-0.13418	-0.18984	0.14746
0.61	-37.0061	103.993	822.9224	-1.2344	0.50586	-0.14941	-15.125	107.47694	1275.761	-2.0679	0.78662	-0.27881	53.8559	6.94722	52.515	-0.073242	-0.013672	0.11914	-19.641	40.596	25.9722	-0.13037	-0.19678	0.16113
0.612	-49.1909	95.308	801.7595	-1.2085	0.49121	-0.14551	49.4697	121.187	1262.738	-1.9683	0.76611	-0.27588	41.09	48.041	42.5337	-0.079834	-0.018799	0.12305	-9.409	26.2812	44.793	-0.12344	-0.19815	0.17217
0.614	-27.865	101.709	787.439	-1.1602	0.45605	-0.13867	16.518	155.449	1209.1854	-1.9219	0.75098	-0.27344	45.335	2.816	43.4431	-0.084961	-0.027344	0.12939	15.948	22.4638	68.464	-0.10605	-0.19873	0.18614
0.616	-25.5935	114.561	766.502	-1.118	0.43384	-0.13598	18.709	112.003	1202.185	-1.8315	0.72705	-0.2627	41.255	50.47	20.6386	-0.092285	-0.033203	0.13867	23.829	29.8336	49.15	-0.092383	-0.19873	0.19394
0.618	-27.21	117.6066	743.315	-1.0791	0.40869	-0.13281	70.322	149.2801	1184.843	-1.7654	0.70044	-0.25122	22.062	-0.361599999999999	32.29649	-0.090332	-0.036621	0.14307	9.438	-3.693	35.355	-0.071973	-0.19717	0.1999
0.62	-11.054	119.605	724.664	-1.0234	0.38574	-0.12891	17.943	144.561102	1147.3386	-1.6948	0.67627	-0.25049	21.806	36.0941	14.655	-0.081543	-0.047363	0.15234	-32.5109	13.2204	14.511	-0.041016	-0.19385	0.2002
0.622	-6.749	121.607	694.0184	-0.99756	0.37158	-0.12891	61.58442	141.9706	1137.197	-1.6035	0.63672	-0.23633	2.607	-38.1863	34.302	-0.069092	-0.052246	0.16578	-22.481	0.3111	37.8674	-0.012109	-0.1875	0.19609
0.624	10.745	119.3857	659.20288	-0.93945	0.34961	-0.12891	67.6517	205.544	1071.466	-1.5581	0.61963	-0.23096	23.445	9.694	10.2183	-0.050293	-0.058105	0.17578	-3.969	21.827	41.465	0.019434	-0.18037	0.18564
0.626	13.553	111.6758	629.88433	-0.89893	0.33008	-0.12573	33.396	176.256	1018.87	-1.4727	0.57422	-0.21777	23.444	-40.484	34.6019	-0.015625	-0.072754	0.18652	31.708	7.867	30.0821	0.05459	-0.17412	0.16963
0.628	34.2	118.106	628.34	-0.86133	0.31348	-0.12598	42.103	180.4939	994.463	-1.4045	0.54516	-0.20972	-12.861	34.0072	18.7386	0.011719	-0.079102	0.19531	5.636	-2.066	17.4526	0.099121	-0.17188	0.16025
0.63	37.729	121.264	608.3951	-0.80664	0.29053	-0.11621	0.551000000000002	208.716	940.9606	-1.3433	0.51709	-0.20068	-26.145	7.3699	24.6425	0.063965	-0.10156	0.2002	-24.01	-9.2778	-4.0783	0.14307	-0.17725	0.14551
0.632	41.3079	125.946	585.4253	-0.7832	0.2793	-0.12012	23.766	167.777	920.643	-1.2598	0.47363	-0.19531	-32.663	67.338	-17.5276	0.10449	-0.12207	0.20044	-27.084	-8.33112	24.0853	0.18486	-0.19453	0.13096
0.634	38.9744	114.323	553.5074	-0.73438	0.25879	-0.11816	41.668	218.4482	905.7645	-1.2178	0.4541	-0.19336	-43.6619	16.31041	-5.3224	0.15332	-0.14404	0.19092	-14.719	16.4993	41.067	0.22598	-0.20674	0.11455
0.636	25.79	109.2986	545.1526	-0.70239	0.24683	-0.11011	-11.164	215.8872	844.996	-1.1328	0.41016	-0.18652	-55.837	49.468	-1.476	0.20703	-0.18604	0.18311	23.675	-8.8188	47.6967	0.26074	-0.23096	0.089159
0.638	23.58	125.221	519.9916	-0.67334	0.23779	-0.1084	4.175	197.423	827.2583	-1.0787	0.38282	-0.18506	-26.891	-15.8664	41.79	0.23633	-0.2002	0.18066	14.2201	-9.678	29.113	0.28496	-0.24492	0.074707
0.64	13.715	124.353	497.0066	-0.62646	0.22021	-0.10205	3.33000000000001	228.664	781.594	-1.0234	0.35205	-0.17773	-62.789	34.72404	26.0415	0.28906	-0.2417	0.15918	0.373000000000001	-60.081	32.381	0.2998	-0.2666	0.058594
0.642	26.249	120.257	471.793	-0.60596	0.2085	-0.096191	-23.96	181.9181	734.729	-0.95508	0.31445	-0.17236	-51.1515	-11.9811	-2.2861	0.32031	-0.27002	0.14697	-20.221	-39.4309	59.3405	0.30254	-0.28232	0.037891
0.644	8.16	101.423	464.016	-0.56348	0.19287	-0.099609	10.644	188.0343	720.4876	-0.91699	0.29541	-0.1709	-62.5463	45.113	7.627	0.3501	-0.29443	0.13477	-25.362	-10.246	115.8916	0.29824	-0.29375	0.023535
0.646	-7.009	97.497	451.103	-0.52857	0.18213	-0.097412	-36.388	216.279	674.8619	-0.85059	0.2666	-0.16113	-38.9368	-7.51659	17.6654	0.38477	-0.31738	0.11523	7.717	2.553	177.976	0.29082	-0.30469	0.01416
0.648	-24.406	93.4057	436.093	-0.49902	0.16504	-0.099609	-5.601	182.927	659.6926	-0.80444	0.24487	-0.15747	-38.825	46.042	19.5391	0.40479	-0.32764	0.11377	33.187	10.117	179.643	0.2708	-0.31104	0.0085936
0.65	0.747999999999998	103.296	407.1518	-0.45801	0.14941	-0.09668	15.914	228.006	626.05	-0.75537	0.22705	-0.15332	22.214	12.6307	18.2431	0.42627	-0.3374	0.09668	26.329	-24.2222	214.242	0.23926	-0.3042	-6.1062e-14
0.652	3.621	109.487	381.1243	-0.43896	0.14063	-0.096191	-32.273	198.991	577.7683	-0.69141	0.20313	-0.15039	-10.677	45.961	-9.8487	0.43677	-0.34399	0.087158	-5.011	15.0283	270.7786	0.19258	-0.28642	-0.0094726
0.654	-29.061	116.714	359.2248	-0.40625	0.12207	-0.096191	17.494	175.5037	559.6428	-0.66162	0.19092	-0.14258	1.244	7.6231	1.461834	0.44238	-0.34082	0.077637	-7.389	46.53	373.509	0.13828	-0.25635	-0.013281
0.656	-38.161	106.254	335.9089	-0.38355	0.1128	-0.087158	14.302	212.222	520.9801	-0.60254	0.15771	-0.12988	4.15199999999999	32.294	24.3589	0.44385	-0.33643	0.066895	-1.423	110.48	462.054	0.078125	-0.2247	-0.014453
0.658	-34.11	104.032	328.108	-0.36035	0.094727	-0.084473	-4.669	167.1306	495.2994	-0.55786	0.13183	-0.12182	20.189	12.7834	22.777	0.43652	-0.32666	0.058594	11.9417	116.679	496.30836	0.022656	-0.1875	-0.013379
0.66	-11.662	105.828	322.742	-0.32959	0.078613	-0.078613	35.125	182.8254	474.882	-0.51563	0.10645	-0.11328	36.258	47.355	26.2926	0.42285	-0.30225	0.061035	-15.99826	105.43	558.188	-0.029785	-0.14746	-0.015137
0.662	-45.1512	103.464	316.919	-0.32031	0.067871	-0.078125	15.617	196.546	417.389	-0.46924	0.079102	-0.10156	72.267	23.34888	36.996	0.40503	-0.28125	0.049805	-17.1812	82.208	657.6947	-0.069629	-0.10762	-0.016797
0.664	-36.222	97.682	295.8282	-0.29834	0.057129	-0.077148	43.578	170.434	394.67289	-0.44531	0.062012	-0.092285	16.057	45.295	36.688	0.38281	-0.25586	0.049316	-32.7207	59.5288	784.052	-0.10743	-0.062988	-0.026172
0.666	-4.1	103.313	272.838	-0.29102	0.052246	-0.079834	66.8346	211.437	359.5532	-0.40332	0.036621	-0.080078	26.7392	34.6252	32.7314	0.34863	-0.21631	0.046387	0.295000000000002	54.621	865.1759	-0.13594	-0.021973	-0.032812
0.668	-10.169	112.137	253.199	-0.28809	0.054199	-0.094238	16.537	186.306	328.762	-0.36523	0.016113	-0.074218	37.915	47.348	20.1535	0.31836	-0.1875	0.042968	9.134	1.924	929.662	-0.15224	0.011328	-0.044629
0.67	-17.669	101.841	241.9636	-0.26563	0.047852	-0.062012	64.4141	174.267	332.7099	-0.3335	-0.0087891	-0.068848	56.2389	39.079	10.671	0.28955	-0.15137	0.035156	12.991	-22.976	958.835	-0.16406	0.043457	-0.056152
0.672	-6.943	78.7205	246.589	-0.23828	0.04248	-0.036621	55.5012	190.921	306.5653	-0.28174	-0.035156	-0.066406	28.512	17.1916	27.935	0.25439	-0.11035	0.033691	36.396	-115.586	1020.042	-0.17119	0.062207	-0.069629
0.674	38.7017	77.346	240.388	-0.20801	0.032715	-0.019531	56.4571	146.16	309.688	-0.26318	-0.045898	-0.063965	43.7276	3.3528	11.0701	0.23535	-0.087891	0.033691	62.327	-127.203	1046.176	-0.17158	0.074512	-0.079883
0.676	19.527	65.505	217.625	-0.18824	0.019532	-0.024658	88.6719	155.37	289.39	-0.22607	-0.069336	-0.061035	14.951	-1.6581	18.7728	0.19971	-0.049316	0.022461	59.981	-172.7212	1073.928	-0.16924	0.07959	-0.095117
0.678	13.958	63.002	201.479	-0.16797	0.0073242	-0.028809	28.709	157.997	247.9851	-0.19922	-0.093752	-0.055176	10.214	24.53469	12.9	0.17749	-0.019531	0.019775	36.697	-209.066	1070.485	-0.16777	0.077539	-0.10547
0.68	35.4	53.1945	208.967	-0.14453	0.0043945	-0.030273	30.452	126.745	235.6738	-0.16895	-0.1123	-0.053223	-21.234	15.125	41.093	0.15381	0.0073242	0.015137	25.9287	-218.772	1069.616	-0.15918	0.0625	-0.11768
0.682	43.766	65.956	203.341	-0.13281	0.0043945	-0.035156	50.654	165.055	203.186	-0.15039	-0.13623	-0.053223	-8.886	25.32035	45.063	0.12695	0.043457	0.0083008	-16.045	-252.048	1103.223	-0.15069	0.046387	-0.12608
0.684	42.954	84.733	174.697	-0.09668	0.00048828	-0.016113	0.0599999999999987	146.392	185.785	-0.13379	-0.14697	-0.051758	-25.431	5.433	39.593	0.11377	0.058105	0.0043945	-19.812	-246.205	1147.278	-0.13662	0.022364	-0.13447
0.686	9.903	62.8587	163.2627	-0.070069	-0.0056152	-0.016846	32.844	104.33708	206.879	-0.11572	-0.16797	-0.046387	-27.647	29.4176	3.966	0.085938	0.090332	0.0063477	-9.241	-252.552	1193.069	-0.1206	-0.0049805	-0.14463
0.688	35.17	53.871	174.994	-0.048828	-0.010254	-0.021973	24.776	104.3328	185.205	-0.11158	-0.17895	-0.046387	-37.906	16.1803	19.7692	0.070801	0.11352	0.0036621	-9.616	-228.362	1186.699	-0.10674	-0.034766	-0.15107
0.69	58.2477	54.5862	172.941	-0.020996	-0.016113	-0.025879	-9.037	54.6535	169.719	-0.099609	-0.18652	-0.045898	-48.81326	29.85596	9.2641	0.052246	0.13574	0.0048828	-14.583	-221.952	1176.005	-0.094727	-0.066895	-0.15381
0.692	35.819	52.8381	144.169	-0.0068359	-0.021973	-0.029785	15.176	79.158	146.785	-0.099121	-0.19336	-0.041016	-43.031	-14.1643	33.007	0.031738	0.15771	0.0063477	-32.5782	-173.411	1168.021	-0.091602	-0.090332	-0.17461
0.694	4.38500000000001	62.224	108.8556	0.019531	-0.028809	-0.031738	-26.661	95.83	123.138	-0.097656	-0.19336	-0.036621	-53.995	12.9581	-2.9226	0.019043	0.1709	0.010254	-21.076	-138.874	1230.746	-0.10967	-0.10644	-0.18672
0.696	33.846	63.073	114.6789	0.04126	-0.038575	-0.031982	-13.636	65.832	115.9074	-0.090332	-0.19434	-0.030273	-41.84	-24.18749	0.3309	-0.0024414	0.19287	0.019043	-14.777	-117.458	1273.699	-0.146	-0.11895	-0.19375
0.698	21.842	59.426	134.068	0.05957	-0.044922	-0.03125	-6.255	99.442	91.844	-0.086915	-0.19287	-0.022705	-31.944	37.4689	12.4214	-0.019043	0.20899	0.023194	20.828	-98.68	1295.7292	-0.21318	-0.12666	-0.20196
0.7	-21.859	62.261	88.5806	0.067871	-0.055176	-0.033203	-27.165	73.936	71.296	-0.084473	-0.18848	-0.014648	-30.8902	6.1939	44.798	-0.032715	0.2207	0.024902	40.195	-136.03	1304.6619	-0.30859	-0.12305	-0.20264
0.702	-15.637	54.865	78.185	0.074707	-0.064941	-0.029785	-2.31	53.43976	72.22	-0.080078	-0.17969	-0.010742	-49.491	48.0406	25.126	-0.051758	0.2373	0.029297	7.688	-141.919	1300.956	-0.42178	-0.11748	-0.19082
0.704	10.17	43.741	99.472	0.09082	-0.081055	-0.029297	-44.2312	65.7555	62.785	-0.071289	-0.17627	-0.0097656	-6.264	-25.024	49.4061	-0.061035	0.24219	0.033691	4.695	-173.922	1374.15704	-0.5541	-0.10527	-0.16885
0.706	-12.814	41.7078	103.516	0.091064	-0.088867	-0.03003	-45.5263	30.0517	81.797	-0.060059	-0.16309	-0.0029297	-3.722	-8.862	52.9724	-0.072754	0.2583	0.038086	-6.255	-164.0271	1435.181	-0.70527	-0.09082	-0.13409
0.708	-51.667	43.378	82.2602	0.089844	-0.09375	-0.028809	3.248	39.5782	48.136	-0.050537	-0.15405	0	-3.015	-66.8914	97.98	-0.085693	0.26782	0.048095	17.768	-164.3029	1472.974	-0.86279	-0.078125	-0.10225
0.71	-38.396	42.538	58.2862	0.099121	-0.099609	-0.025879	-22.998	41.271	21.6344	-0.043945	-0.14648	0.0048828	3.04199999999999	-0.0280000000000022	128.0735	-0.096191	0.27588	0.062012	8.126	-185.237	1476.5183	-1.0347	-0.063477	-0.076172
0.712	-14.225	41.167	67.795	0.095703	-0.098633	-0.023438	10.298	11.2427	38.2527	-0.026367	-0.14014	0.0053711	33.7075	-32.2876	195.88885	-0.11475	0.28809	0.061523	17.415	-173.937	1452.471	-1.2072	-0.035254	-0.057715
0.714	-23.756	43.933	89.016	0.092773	-0.097168	-0.025391	2.282	40.57246	24.4974	-0.021973	-0.13574	0.0029297	-18.291	32.66513	244.823	-0.12061	0.2959	0.066406	32.925	-152.114	1488.6234	-1.3765	0.0041993	-0.039355
0.716	-53.5912	29.24	75.138	0.08667	-0.093995	-0.025391	-22.504	31.838	2.986	-0.012207	-0.13525	0.0078125	10.9486	-34.212	365.066	-0.13525	0.31055	0.07666	50.604	-97.403	1546.485	-1.5452	0.061231	-0.037012
0.718	-27.767	30.6853	58.5352	0.081543	-0.089844	-0.024414	46.3843	13.70172	21.944	-0.0053711	-0.13379	0.010254	-28.2521	28.3204	478.716	-0.14526	0.31617	0.07837	67.789	-68.65	1596.941	-1.7168	0.12998	-0.055957
0.72	5.683	50.482	56.9708	0.068848	-0.083496	-0.029297	10.634	19.9123	9.5725	-0.0073242	-0.13428	0.011719	-37.3917	-14.4155	633.396	-0.15283	0.32666	0.08252	73.328	-54.739	1583.687	-1.8745	0.21729	-0.088867
0.722	-35.594	44.881	42.0362	0.055176	-0.078125	-0.025879	8.485	-19.4625	22.1633	-0.0092773	-0.13965	0.019043	-54.835	34.239	720.366	-0.15967	0.34033	0.081055	99.30364	-60.017	1580.622	-2.0088	0.32246	-0.12012
0.724	-33.953	24.055	39.7126	0.037109	-0.064453	-0.026855	59.2865	-9.2074	23.4796	-0.010498	-0.14453	0.024414	-63.0122	-17.5777	825.0466	-0.15918	0.34717	0.080078	91.5342	-31.312	1559.809	-2.0989	0.41914	-0.14697
0.726	2.47300000000001	12.0067	47.3523	0.022705	-0.055176	-0.028321	22.7	11.40019	-2.5395	-0.015137	-0.15088	0.03125	-114.051	-5.303	924.9955	-0.1665	0.35156	0.070313	116.9001	-3.694	1578.126	-2.1297	0.50391	-0.15987
0.728	18.336	30.7409	47.557	0.003418	-0.043945	-0.022949	28.0032	-0.4594	23.0001	-0.023438	-0.15234	0.038086	-55.554799	-85.725	1015.087	-0.1687	0.3562	0.050781	97.119	21.65722	1586.6617	-2.1412	0.55996	-0.18984
0.73	14.811	34.336	29.1571	-0.023438	-0.023926	-0.02832	34.4342	36.456	7.595	-0.027832	-0.15332	0.043945	-30.203	-76.027	1069.667	-0.17432	0.35645	0.020508	91.2933	33.0989	1541.6775	-2.1362	0.61377	-0.23633
0.732	-4.921	29.021	38.929	-0.037109	-0.017578	-0.02832	-13.009	29.768	-9.402	-0.029297	-0.14795	0.048828	-34.551	-124.961	1064.517	-0.18994	0.35693	-0.023926	87.548	0.58	1536.5508	-2.1202	0.65713	-0.2873
0.734	22.921	35.751	43.903	-0.05957	-0.0048828	-0.030273	53.4648	24.0682	5.3747	-0.033204	-0.14477	0.059571	1.549	-135.817	1059.12	-0.20313	0.35938	-0.049805	76.543	-5.4705	1534.221	-2.1028	0.67343	-0.33164
0.736	35.253	46.11	31.1164	-0.076904	0.0065918	-0.025635	27.768	46.164	-6.3639	-0.035156	-0.13965	0.06543	59.191	-199.902	1095.896	-0.24512	0.36865	-0.11426	55.619	-19.27014	1560.997	-2.0918	0.67266	-0.37305
0.738	36.864	40.983	22.694	-0.092773	0.014648	-0.025391	-10.206	14.156	6.4339	-0.033203	-0.13184	0.074707	33.03	-182.429	1100.401	-0.29346	0.38134	-0.16089	65.692	-25.75302	1596.53	-2.0939	0.64238	-0.41035
0.74	7.14299999999999	17.54863	30.24875	-0.10742	0.027344	-0.021484	30.844	13.7654	14.5209	-0.029785	-0.13184	0.078613	19.409	-213.718	1092.679	-0.35352	0.39404	-0.20313	77.276	-25.9426	1558.499	-2.0957	0.58008	-0.42969
0.742	39.53	13.6172	41.19	-0.1167	0.03418	-0.018066	-24.476	27.0395	-1.9135	-0.018066	-0.12305	0.083984	41.134	-240.414	1103.8016	-0.45508	0.4209	-0.25781	52.279	-26.436	1523.566	-2.0975	0.50088	-0.43896
0.744	33.937	25.1011	45.84	-0.13232	0.04541	-0.016113	-10.07	20.076	21.8592	-0.0097657	-0.11548	0.090088	4.749	-311.47	1093.2588	-0.51465	0.43457	-0.28613	82.7845	-0.581999999999999	1489.8428	-2.1129	0.41445	-0.43984
0.746	13.016	37.558	30.1263	-0.14673	0.056153	-0.0090332	-1.466	46.228	15.73393	-0.0014648	-0.10986	0.095215	-37.09	-316.612	1151.943	-0.65771	0.46924	-0.34717	73.209	34.5797	1489.60802	-2.141	0.32773	-0.43672
0.748	11.434	27.7829	14.7336	-0.16016	0.063965	0.003418	-37.0824	41.643	15.0955	0.021973	-0.10791	0.098633	-15.762	-279.583	1184.271	-0.7876	0.50074	-0.39112	81.011	63.859	1474.5137	-2.1819	0.24854	-0.42764
0.75	22.782	19.0251	24.5894	-0.16553	0.078125	0.0053711	-13.463	35.263	21.206	0.037598	-0.11133	0.097168	30.597	-225.87	1245.225	-0.92383	0.53125	-0.42725	51.45	75.389	1469.5335	-2.2417	0.19043	-0.42041
0.752	25.186	28.7543	28.4906	-0.16992	0.080566	0.0019531	-36.226	53.621	11.924	0.0625	-0.11279	0.09668	42.007	-179.528	1251.5638	-1.0757	0.57471	-0.40918	34.379	80.22	1421.8122	-2.3169	0.18027	-0.40459
0.754	-20.73	33.078	15.3747	-0.16992	0.088379	0.0087891	-34.3636	22.585	23.9896	0.083984	-0.12207	0.082764	57.124	-194.904	1265.3375	-1.2358	0.63623	-0.46143	25.12	93.3763	1397.0692	-2.4047	0.20576	-0.38867
0.756	-3.761	34.987	22.2589	-0.16724	0.09082	0.015136	-8.595	0.184000000000001	38.648	0.10352	-0.13232	0.077148	66.74	-208.70151	1249.165	-1.5605	0.76855	-0.48828	-9.679	158.472	1364.4014	-2.4969	0.26631	-0.38554
0.758	0.298000000000002	21.4704	36.7037	-0.15771	0.095215	0.014648	-43.0879	4.8608	28.8567	0.13281	-0.14209	0.063965	96.9867	-249.11	1351.48	-1.7908	0.87719	-0.45093	14.142	187.378	1338.9526	-2.5815	0.35166	-0.3915
0.76	-25.41	21.1845	30.4164	-0.14502	0.085938	0.020508	-6.442	-7.7589	26.2293	0.146	-0.14844	0.055664	107.7799	-267.886	1425.188	-2.0132	1.0015	-0.40332	-8.435	203.84	1303.2496	-2.625	0.44531	-0.40527
0.762	-50.3481	16.51027	15.7788	-0.1333	0.085938	0.021484	-1.28	43.012	20.4633	0.1665	-0.15918	0.03418	74.5449	-300.408	1496.762	-2.2988	1.1445	-0.33643	0.797000000000004	208.172	1240.0232	-2.6522	0.53066	-0.42168
0.764	-21.411	25.79894	7.234	-0.11621	0.069336	0.01709	-49.1847	53.355	14.70994	0.17456	-0.16675	0.020752	23.342	-314.042	1463.399	-2.4175	1.2095	-0.3208	-7.376	191.6878	1207.8461	-2.6694	0.61768	-0.46153
0.766	-7.155	41.7298	24.59383	-0.089844	0.057617	0.016602	-1.756	30.36	35.1819	0.18359	-0.17773	0.0078125	-2.207	-360.123	1478.596	-2.5894	1.3247	-0.31396	22.845	214.123	1183.1564	-2.6667	0.69541	-0.50176
0.768	-45.066	45.6387	25.4446	-0.075684	0.050781	0.017578	-20.15	49.824	24.5127	0.19189	-0.18701	-0.0048828	-9.388	-330.132	1455.665	-2.6306	1.3919	-0.31372	21.165	222.813	1204.73566	-2.66	0.76143	-0.54014
0.77	-43.171	26.622	16.1048	-0.054688	0.036133	0.018066	0.521999999999998	6.737	32.7658	0.19678	-0.18994	-0.0068359	31.44	-286.173	1529.936	-2.6152	1.4355	-0.31299	28.22	232.599	1195.1993	-2.6636	0.80518	-0.57764
0.772	-19.522	17.7522	19.4608	-0.030762	0.021728	0.016601	50.6262	5.12274	27.9228	0.19531	-0.20703	-0.012695	35.557	-205.203	1564.689	-2.5156	1.4395	-0.31445	40.98	224.178	1145.674	-2.6775	0.82851	-0.62012
0.774	-6.016	21.7958	33.7541	-0.013184	0.0068359	0.0087891	-6.401	14.3388	25.0928	0.1853	-0.20728	-0.017579	15.3241	-191.8078	1609.001	-2.439	1.4126	-0.31592	18.125	204.95	1105.086	-2.68	0.84463	-0.65498
0.776	-17.167	29.306	29.3496	0.0083008	-0.0092773	0.0068359	28.5155	-11.9121	42.066	0.16943	-0.20117	-0.027832	-21.702	-179.4312	1563.744	-2.2715	1.2813	-0.31836	40.3844	232.016	1086.892	-2.6647	0.84424	-0.67959
0.778	-21.935	17.3578	32.565	0.018555	-0.018066	0.003418	47.8044	30.8203	20.625	0.14063	-0.18604	-0.036621	12.315	-161.5123	1590.097	-2.0518	1.0948	-0.34399	16.395	224.7528	1077.902	-2.6327	0.8251	-0.6876
0.78	8.999	17.62484	30.4236	0.040039	-0.032715	0	-6.663	27.265	-0.00419999999999909	0.12695	-0.17969	-0.027832	-1.546	-93.56	1604.194	-1.8145	0.94141	-0.37402	8.297	219.5548	1046.274	-2.5859	0.7959	-0.69141
0.782	-8.073	32.4333	23.8459	0.054688	-0.045899	-0.0031738	55.0912429	3.2444	26.0668	0.094238	-0.14307	-0.028809	-18.202	-61.129	1638.211	-1.8062	0.95752	-0.38721	30.776	201.913	990.536	-2.5358	0.76221	-0.69189
0.784	19.242	27.6771	31.3117	0.065918	-0.054199	-0.0063477	23.823	17.5276	23.0335	0.070801	-0.11622	-0.031982	-39.089	-30.637	1610.6754	-1.9746	0.99219	-0.39453	-12.806	207.492	914.22	-2.4823	0.72373	-0.69756
0.786	10.685	7.0207	48.712	0.086914	-0.068848	-0.016602	2.742	-9.8953	27.4972	0.04541	-0.087402	-0.034668	-71.345	-60.552	1606.2684	-2.2905	1.0552	-0.32129	20.332	227.824	880.251	-2.426	0.69014	-0.6999
0.788	34.949	-7.5063	65.169	0.092773	-0.071777	-0.019043	43.775	1.47337	34.1657	0.016113	-0.040039	-0.040039	-117.966	-65.5	1597.551	-2.3982	1.0872	-0.29078	38.4686	258.8963	839.1394	-2.3686	0.66094	-0.69551
0.79	24.871	-1.28	52.8707	0.10596	-0.084473	-0.025391	4.575	15.22721	13.581	0.0043945	-0.018555	-0.037598	-89.585	-98.5348	1659.3997	-2.4395	1.082	-0.33301	24.76097	270.102	770.448	-2.314	0.64209	-0.68896
0.792	13.322	-1.067	51.255	0.11621	-0.093262	-0.034912	15.483	-30.55	21.044	-0.015625	0.019531	-0.040039	-86.223	-83.439	1662.54809	-2.4121	0.99805	-0.40234	-9.5613	235.4039	730.26752	-2.2689	0.6167	-0.68252
0.794	21.535	-14.044	74.749	0.12158	-0.10205	-0.049316	16.413	1.077	4.302	-0.027099	0.051025	-0.043213	-78.649	-98.2298	1684.58	-2.418	0.98926	-0.42822	-1.1989	243.56523	655.216	-2.2269	0.59473	-0.67187
0.796	28.573	-29.345	99.22	0.125	-0.11035	-0.064941	-19.571	19.7477	-7.8296	-0.036133	0.076172	-0.044434	-88.623	-80.1619	1664.591	-2.4565	1.0962	-0.47998	-8.5994	241.2676	632.676	-2.1828	0.57168	-0.66289
0.798	35.23	-30.212	113.935	0.12646	-0.10986	-0.080078	21.143	23.9848	10.6112	-0.037598	0.10791	-0.051758	-73.786	-97.05	1636.928	-2.5044	1.1646	-0.45898	-11.1279	278.323	596.0001	-2.1456	0.55205	-0.64756
0.8	17.457	-31.823	109.707	0.11182	-0.1084	-0.083008	-11.054	50.017	24.84	-0.041504	0.12256	-0.055664	-46.565	-79.192	1666.905	-2.5645	1.2109	-0.46191	1.455	269.461	563.7923	-2.1035	0.52832	-0.63379
0.802	32.257	-15.8975	146.948	0.10083	-0.11059	-0.096194	-44.3714	9.7321	21.4326	-0.037598	0.1416	-0.056152	-19.1512	-76.89491	1671.86	-2.6577	1.2661	-0.50928	-58.283	258.665	495.2016	-2.0505	0.51114	-0.61259
0.804	19.259	18.593	212.7535	0.08252	-0.10498	-0.1084	-22.131	-1.8741	6.9766	-0.030029	0.15454	-0.070557	-34.268	-53.216	1652.2674	-2.7085	1.2896	-0.5249	-62.303	238.3	438.4787	-2.0031	0.49453	-0.58868
0.806	26.956	57.7538	287.261	0.038574	-0.094238	-0.11572	-33.15	18.5328	-8.02	-0.020996	0.16162	-0.07666	-58.692	-43.5316	1624.596	-2.7769	1.3462	-0.51709	-68.406	235.4449	406.4237	-1.9531	0.48438	-0.55664
0.808	7.171	77.8578	357.081	0.010254	-0.092773	-0.125	-6.529	-6.8984	8.4306	-0.003418	0.17236	-0.09082	-44.775	10.566	1596.696	-2.8171	1.3919	-0.51734	-52.14	248.008	397.227	-1.9079	0.4708	-0.53095
0.81	0.184000000000005	65.0378	396.333	-0.062988	-0.07666	-0.14307	-17.76	23.9011	-0.4406	0.0048828	0.17188	-0.099121	-17.873	32.798	1571.669	-2.8452	1.4399	-0.52588	-52.572	214.469	382.468	-1.8647	0.45752	-0.50244
0.812	-13.144	47.5594	438.2026	-0.13306	-0.06372	-0.15821	-62.856	14.9571	-8.1032	0.026855	0.16895	-0.11328	21.751	58.6	1532.196	-2.8633	1.4902	-0.53955	-55.158	192.27	321.777	-1.827	0.44873	-0.46982
0.814	-33.531	33.6729	484.741	-0.2085	-0.041992	-0.17822	1.252	11.6186	2.059	0.04419	0.16406	-0.12256	6.832	45.4294	1507.666	-2.8569	1.5024	-0.54053	-91.164	178.296	297.4818	-1.7815	0.44101	-0.43584
0.816	-20.562	19.755	549.799	-0.32617	-0.00097656	-0.18701	-17.736	41.206	1.5125	0.061035	0.15332	-0.12939	3.962	57.039	1484.6582	-2.8237	1.5083	-0.54053	-78.698	197.796	247.023	-1.7382	0.43437	-0.41318
0.818	-7.059	20.787	586.186	-0.38184	0.017578	-0.18945	-27.387	19.4703	26.2169	0.08252	0.13818	-0.14648	-20.2761	48.628	1479.009	-2.8064	1.5286	-0.53589	-20.83	212.385	252.1731	-1.6851	0.42373	-0.38095
0.82	8.496	-2.093	564.5268	-0.50781	0.057617	-0.18066	21.917	17.4908	31.5862	0.09082	0.13135	-0.15283	11.8121	59.39	1433.0836	-2.8066	1.5547	-0.51953	-47.83	223.272	233.7216	-1.6309	0.41406	-0.35498
0.822	-18.094	-38.716	525.541	-0.62597	0.095458	-0.17969	-22.504	37.1667	6.8556	0.10156	0.11377	-0.16357	0.856000000000002	53.769	1408.2275	-2.8496	1.5957	-0.49316	-14.362	215.83	206.7717	-1.568	0.40449	-0.32735
0.824	-40.6402	-58.627	547.2182	-0.74609	0.13672	-0.1626	10.1439	11.9833	8.0808	0.11377	0.097413	-0.16968	24.516	49.735	1390.6002	-2.8706	1.6157	-0.47998	-45.004	176.112	183.768	-1.5074	0.39395	-0.30167
0.826	-15.019	-32.2906	598.8436	-0.90967	0.20313	-0.12402	25.334	27.725	-1.219	0.11963	0.083984	-0.17578	-21.3191	49.3467	1373.5323	-2.8789	1.6328	-0.4668	-54.908	173.79	151.008	-1.4403	0.39082	-0.26729
0.828	9.547	4.136	655.5456	-0.99219	0.23926	-0.10645	-4.431	20.01837	5.2649	0.11719	0.067383	-0.18799	-3.669	79.239	1340.9732	-2.8399	1.6328	-0.46118	-40.6778	156.293	162.374	-1.3837	0.39053	-0.2378
0.83	19.775	24.62	684.4667	-1.1831	0.32471	-0.078125	35.87	9.0352	18.3263	0.12061	0.059082	-0.19141	-40.808	97.7962	1335.4429	-2.7827	1.606	-0.46924	-7.779	171.876	128.69428	-1.3198	0.38916	-0.20947
0.832	-39.3478	4.712	700.241	-1.3416	0.40723	-0.075195	31.749	52.05	3.010783	0.11475	0.050293	-0.20068	-12.3707	114.971	1320.842	-2.6733	1.5493	-0.45654	-1.858	123.645	99.19496	-1.2648	0.38965	-0.18466
0.834	-30.3654	-14.0321	715.717	-1.4995	0.50439	-0.072754	0.782	45.1797	22.2786	0.10962	0.042481	-0.21167	-42.5523	106.231	1327.941	-2.6191	1.5117	-0.44336	6.54	95.3344	69.824	-1.207	0.3961	-0.15965
0.836	-13.679	-26.838	737.51	-1.6714	0.63916	-0.063477	50.365	23.8362	70.7216	0.10205	0.037109	-0.22656	-30.398	94.3579	1291.088	-2.5562	1.4106	-0.41455	27.648	74.5896	63.525	-1.1472	0.39805	-0.13465
0.838	25.706	-10.152	756.209	-1.7227	0.70508	-0.048828	5.601	6.347	78.0656	0.085449	0.030273	-0.25049	-59.8727	88.843	1238.75	-2.5103	1.3442	-0.37524	9.751	35.4292	70.725	-1.085	0.39599	-0.10116
0.84	41.828	-5.435	773.6056	-1.7852	0.81055	-0.040039	-9.185	-50.375	79.2756	0.074707	0.032227	-0.2666	-42.749	94.2771	1169.955	-2.4688	1.3105	-0.3623	48.1878	39.433	74.3631	-1.0176	0.39844	-0.083984
0.842	38.222	-8.06999999999999	756.059	-1.8034	0.87329	-0.065674	22.8489	-23.133	100.499	0.03125	0.039551	-0.29541	-64.6337	145.338	1151.3461	-2.3945	1.2754	-0.34277	31.01112	5.8318	71.612	-0.95108	0.40215	-0.067021
0.844	35.479	-48.732	748.254	-1.7988	0.94727	-0.10596	-11.4771	-14.147	116.576	-0.017578	0.054688	-0.30151	-48.39947	178.967	1115.2403	-2.3477	1.252	-0.32715	13.6243	-17.6414	40.0247	-0.88294	0.39698	-0.049367
0.846	8.497	-92.4962	755.225	-1.7456	1.0259	-0.16553	31.104	-43.9945	172.75	-0.081543	0.074219	-0.30176	-46.67593	207.924	1061.859	-2.2476	1.1978	-0.3125	21.137	-33.434	32.3595	-0.81656	0.39308	-0.035692
0.848	62.38	-113.16	797.769	-1.7065	1.0493	-0.19482	22.281	-3.383	213.078	-0.19141	0.097168	-0.30225	-46.40955	191.384	1024.095	-2.144	1.1392	-0.29541	30.119	-21.2932	28.114	-0.75149	0.38227	-0.021907
0.85	78.025	-117.2436	870.4182	-1.6069	1.0728	-0.2334	14.162	-11.675	327.3203	-0.25488	0.10938	-0.2959	-50.282	209.5826	1005.1302	-2.1016	1.1016	-0.29102	40.718	-18.2258	31.1072	-0.68213	0.37061	-0.013184
0.852	63.212	-122.5293	915.538	-1.5357	1.0537	-0.24658	51.94	-1.0824	488.218	-0.39063	0.12891	-0.29785	-26.17	216.667	988.7002	-2.0132	1.0317	-0.26904	17.495	-12.0908	23.235	-0.61893	0.35459	-0.006217
0.854	5.30200000000001	-134.961	931.852	-1.4688	1.0078	-0.2627	13.449	19.7176	628.631	-0.5	0.14697	-0.30152	-23.972	257.934	960.643	-1.945	0.98169	-0.25782	10.007	-11.91823	5.8094	-0.55581	0.33918	0.00095133
0.856	-10.35	-142.915	945.498	-1.3882	0.8833	-0.27295	39.326	-41.1307	700.1905	-0.62012	0.1626	-0.31445	-4.5752	226.51	938.963	-1.8823	0.93018	-0.24951	-30.121	-9.75122	-10.266	-0.49807	0.31364	0.011837
0.858	8.011	-128.261	981.8147	-1.3511	0.79541	-0.27637	39.079	-52.295	758.906	-0.7876	0.19385	-0.32764	-19.075	220.018	900.998	-1.7983	0.86963	-0.2417	4.617	25.3426	-0.430999999999999	-0.4538	0.29245	0.026347
0.86	8.53100000000001	-111.5695	1031.606	-1.2852	0.61914	-0.27979	-5.005	-71.486	829.282	-0.87793	0.22119	-0.33594	-8.38	174.777806	862.775	-1.7515	0.84424	-0.23682	-15.841	21.4131	16.3319	-0.41064	0.26904	0.03418
0.862	18.977	-91.571	1063.5608	-1.2507	0.49341	-0.29029	32.184	-110.24	929.663	-1.0913	0.27783	-0.34229	5.617	201.232	791.9839	-1.6597	0.79443	-0.22559	-24.632	49.1496	-22.638	-0.38039	0.2409	0.037173
0.864	16.752	-82.314	1070.987	-1.229	0.39014	-0.3042	-5.247	-66.784	936.064	-1.2847	0.34205	-0.32251	47.941	198.702	757.389	-1.5844	0.75781	-0.21924	-4.092	25.5567	-18.577	-0.35451	0.22142	0.046829
0.866	25.09	-76.416	1082.517	-1.2388	0.28418	-0.32471	-25.436	-73.055	923.795	-1.5151	0.42822	-0.28662	46.511	230.382	695.728	-1.5117	0.7207	-0.21484	-65.0088	45.756	-24.8315	-0.343	0.19891	0.046684
0.868	20.498	-90.845	1119.203	-1.2534	0.24512	-0.33252	-6.635	-79.901	942.754	-1.9058	0.5752	-0.22656	25.879	166.3	685.6443	-1.4141	0.67383	-0.20703	-44.8963	66.133	-2.6668	-0.33757	0.18072	0.047842
0.87	46.095	-86.69	1143.6957	-1.314	0.21338	-0.35498	-38.7071	-37.94	969.092	-2.1172	0.66797	-0.18164	57.791	179.1872	628.4	-1.3667	0.64502	-0.19922	-18.513	49.027	28.153	-0.33936	0.17041	0.053223
0.872	70.867	-78.227	1165.5212	-1.3757	0.23218	-0.36841	0.100999999999999	-99.286	1041.5641	-2.5762	0.86523	-0.1377	73.7988	148.2477	620.654	-1.2788	0.6001	-0.18848	10.572	63.752	17.22113	-0.35093	0.16699	0.05635
0.874	28.522	-63.68	1170.033	-1.4453	0.27539	-0.37695	31.4882	-110.092	1071.8403	-2.8777	1.0227	-0.13403	83.433	189.057	558.7917	-1.2076	0.5586	-0.1792	-25.683	29.2507	13.2996	-0.36907	0.1663	0.053017
0.876	-6.426	-57.167	1192.5841	-1.5469	0.37109	-0.39063	-63.2256	-129.104	1080.041	-3.0952	1.1782	-0.13672	65.8521	170.5146	547.012	-1.1367	0.51953	-0.17334	-18.737	23.2624	18.804	-0.38374	0.16849	0.059543
0.878	-1.393	-38.451	1233.2415	-1.5933	0.42578	-0.40625	-71.671	-200.505	1116.352	-3.1519	1.3911	-0.11182	23.85	219.441	471.20357	-1.0508	0.47461	-0.16797	-18.798	18.6757	35.4546	-0.39401	0.17359	0.060744
0.88	21.503	-27.4422	1275.4517	-1.6841	0.54346	-0.41748	-50.532	-165.282	1141.412	-3.0874	1.479	-0.11328	21.051	204.686	462.653	-1.0098	0.4502	-0.16504	-27.4075	29.8528	38.804	-0.39404	0.17725	0.069824
0.882	20.919	-29.262	1289.52111	-1.7485	0.62842	-0.42895	4.036	-151.916	1147.905	-2.832	1.6484	-0.16162	42.786	238.674	393.5419	-0.91357	0.40381	-0.16602	32.475	21.5492	58.2595	-0.39256	0.18425	0.075243
0.884	-2.11300000000001	-56.2869	1308.584	-1.8047	0.70801	-0.43262	67.8814	-127.381	1170.211	-2.5749	1.7405	-0.22193	41.903	176.7772	393.762	-0.84814	0.36621	-0.16113	9.21	6.5259	36.9646	-0.3822	0.18612	0.080453
0.886	46.918	-67.47361	1326.854	-1.8828	0.80078	-0.43115	29.289	-67.14	1139.677	-2.3101	1.7622	-0.28564	16.897	193.876	327.76	-0.78467	0.33154	-0.15332	12.155	-0.854700000000001	25.8625	-0.3663	0.1824	0.081985
0.888	57.816	-50.67	1349.653	-1.9253	0.84229	-0.42334	9.58926	-125.845	1150.525	-2.0034	1.6235	-0.36768	13.244	148.7153	310.6573	-0.69678	0.28906	-0.15674	-8.015	8.30459	54.9649	-0.34708	0.18357	0.097784
0.89	94.774	-28.75	1364.0569	-2.0117	0.91211	-0.41602	-9.103	-139.1068	1195.731	-1.8828	1.4795	-0.40332	-6.24299999999999	175.938	260.8718	-0.65576	0.26318	-0.15186	27.057	26.456	60.372	-0.32617	0.17578	0.094238
0.892	77.114	-29.89	1371.418	-2.0769	0.94946	-0.40527	-24.05145	-163.305	1250.413	-1.6758	1.1152	-0.41699	-11.566	126.3676	265.548	-0.56836	0.21094	-0.14453	36.0929	13.67227	51.154	-0.29769	0.16651	0.092741
0.894	104.958	-42.5739	1355.427	-2.1616	0.98682	-0.41357	9.119	-240.713	1334.314	-1.5574	0.82837	-0.40161	-3.653	138.618	226.041	-0.50806	0.16895	-0.1438	52.5212	25.608	34.0076	-0.27058	0.15528	0.095387
0.896	72.198	-37.1913	1353.9582	-2.2651	1.0396	-0.42334	-34.775	-229.99	1360.554	-1.4805	0.56152	-0.39648	-5.013	105.2797	230.023	-0.45068	0.13428	-0.13428	39.54027	10.7293	13.89992	-0.24307	0.13662	0.094285
0.898	54.094	-13.381	1358.297	-2.3105	1.0645	-0.42188	-113.795	-222.635	1346.986	-1.4473	0.27148	-0.39502	-15.102	146.035	188.1952	-0.37891	0.083984	-0.13086	-8.143	5.907	8.0969	-0.22038	0.1133	0.095215
0.9	50.644	3.1821	1377.955	-2.3745	1.0923	-0.42627	-83.166	-239.188	1360.4619	-1.4629	0.15039	-0.39941	-33.056	144.3499	176.52325	-0.3374	0.060547	-0.12451	23.96	23.613	27.8899	-0.19092	0.091797	0.097168
0.902	80.063	9.53999	1380.724	-2.3996	1.1115	-0.4292	-73.4652	-159.2835	1360.529	-1.5332	-0.02832	-0.40039	-50.736	174.588	150.0607	-0.27539	0.023926	-0.12207	15.967	4.1414	20.61	-0.16616	0.061822	0.10862
0.904	62.097	-9.4088	1374.048	-2.3999	1.1196	-0.43311	-16.032	-148.851	1393.358	-1.6226	-0.11474	-0.37598	-36.4509	127.8788	163.653	-0.23389	0.0024414	-0.12573	32.9574	17.5028	2.872	-0.14661	0.031898	0.12429
0.906	22.767	-17.9682	1366.228	-2.3823	1.1099	-0.43701	49.694	-109.524	1468.718	-1.7319	-0.15234	-0.36035	-9.828	112.861	134.638	-0.19727	-0.017578	-0.13086	21.158	-20.6755	10.5224	-0.13023	-0.0024595	0.14185
0.908	23.341	-6.1474	1358.7702	-2.3726	1.1001	-0.44824	43.7415	-47.19	1466.68	-1.9258	-0.092285	-0.35254	-17.145	77.4218	118.437	-0.15332	-0.039551	-0.12988	14.005	-16.7963	7.134	-0.11865	-0.042448	0.1591
0.91	69.718	19.1335	1351.306	-2.314	1.062	-0.44287	54.8263	-101.973	1488.009	-2.0313	-0.020996	-0.354	4.065	89.892	76.59	-0.12842	-0.046875	-0.12842	-16.326	-14.6261	23.02137	-0.11914	-0.075195	0.17285
0.912	79.763	40.7282	1355.094	-2.2706	1.0206	-0.4419	77.298	-64.966	1486.001	-2.2461	0.19336	-0.37891	-13.587	75.4449	71.253	-0.084473	-0.07666	-0.1333	5.421	-1.092	26.42998	-0.11729	-0.10554	0.18524
0.914	62.278	34.829	1370.1574	-2.2305	0.97266	-0.43945	53.222	-34.974	1456.0487	-2.4031	0.38794	-0.4043	-0.252000000000002	95.238	52.4656	-0.057128	-0.090088	-0.12989	9.342	7.556	-3.189	-0.11241	-0.13132	0.19344
0.916	65.93	12.751	1375.514	-2.1792	0.89697	-0.43262	81.414	-77.757	1510.487	-2.543	0.58984	-0.41797	11.46	83.51	26.039	-0.036621	-0.1001	-0.12891	-35.5311	2.39318	-19.2504	-0.10343	-0.1614	0.20673
0.918	80.857	-10.8962	1359.216	-2.1602	0.85645	-0.42969	20.183	-17.573	1501.151	-2.6851	0.85205	-0.4292	53.722	76.763	37.011	-0.013184	-0.11084	-0.13916	-28.61	24.377	-4.7012	-0.086436	-0.18993	0.2124
0.92	59.198	-1.318	1344.288066	-2.1265	0.78076	-0.41162	-26.016	-82.89	1495.209	-2.7241	0.96533	-0.44092	18.339	56.4525	40.0835	-0.003418	-0.11426	-0.13867	-53.2291	33.183	11.6297	-0.054688	-0.20898	0.2207
0.922	28.948	5.8918	1376.129	-2.1084	0.72949	-0.40405	22.638	-110.14	1532.7944	-2.7695	1.1563	-0.47363	31.788	36.43	45.9964	0.013184	-0.11719	-0.14014	-19.461	50.13	24.6325	-0.027141	-0.22491	0.21923
0.924	48.489	6.528	1347.6119	-2.0938	0.68945	-0.39014	40.392	-59.9583	1543.6778	-2.7397	1.2778	-0.51904	28.692	36.0254	43.766	0.023193	-0.11572	-0.13965	-1.142	42.2962	23.712	0.0053801	-0.23438	0.2127
0.926	40.732	-2.319	1302.728	-2.0742	0.64844	-0.38184	92.7623	-114.055	1581.598	-2.7026	1.3091	-0.54248	42.714	31.1187	36.9044	0.03418	-0.11328	-0.14551	-20.365	58.277	-6.22953	0.040146	-0.2332	0.2041
0.928	7.846	9.6741	1280.058	-2.0664	0.63086	-0.37793	96.5054	-76.909	1568.618	-2.623	1.3164	-0.5752	42.998	20.0657	32.455	0.041016	-0.10986	-0.1416	-26.188	49.4935	9.1316	0.088874	-0.23642	0.19677
0.93	12.689	11.9248	1289.241	-2.0483	0.61572	-0.36377	95.0326	-67.4418	1521.639	-2.5659	1.2759	-0.59375	39.444	-5.8819	38.07	0.040527	-0.10645	-0.14502	-8.219	49.816	27.3455	0.14893	-0.24268	0.19189
0.932	65.237	26.924	1303.131	-2.0401	0.60694	-0.36279	140.011	-108.78	1553.995	-2.5171	1.2153	-0.59717	-11.551	1.0847	15.1319	0.041016	-0.093262	-0.14404	6.937	62.181	35.733	0.19395	-0.24453	0.18066
0.934	80.837	52.493	1280.2851	-2.0249	0.60498	-0.35986	122.327	-30.854	1549.165	-2.4727	1.0938	-0.59863	38.872	5.525	22.852	0.038818	-0.084472	-0.13769	-16.518	41.573	27.2433	0.23027	-0.24297	0.16465
0.936	59.579	58.357	1255.14181	-2.0015	0.60986	-0.35889	103.72	-47.47	1522.931	-2.4531	1.0254	-0.5957	11.352	26.9887	15.5752	0.034668	-0.075684	-0.13623	24.7493	50.377	24.2421	0.27754	-0.23985	0.15723
0.938	64.74	58.924	1248.087	-1.9824	0.60742	-0.35742	72.466	-56.557	1537.30166	-2.4004	0.88867	-0.57617	15.513	1.599	27.4634	0.021484	-0.060547	-0.12939	-22.148	13.1899	16.83182	0.32841	-0.24561	0.15274
0.94	87.954	61.613	1233.371	-1.9531	0.60742	-0.3623	3.34	0.988	1491.2831	-2.364	0.80102	-0.56201	-14.855	14.8302	15.9074	0.01416	-0.053223	-0.12549	-17.995	12.64	49.407	0.37109	-0.25439	0.14941
0.942	79.703	78.013	1204.4989	-1.9285	0.60669	-0.36059	-9.997	-51.347	1498.287	-2.3354	0.73877	-0.5459	-3.275	-14.6679	25.50974	-0.0029297	-0.037109	-0.1123	18.902	2.8564	64.665	0.41054	-0.26875	0.14951
0.944	79.443	71.497	1181.257	-1.9058	0.60596	-0.36084	15.849	22.35389	1487.232	-2.3164	0.69727	-0.53467	-26.363	15.5363	9.1492	-0.015869	-0.022217	-0.10254	19.716	-6.2059	47.777	0.43477	-0.28028	0.14512
0.946	55.171	54.8079	1166.6726	-1.8828	0.5957	-0.35352	28.264	57.099	1454.253	-2.3164	0.69238	-0.5293	-9.796	12.0444	27.0478	-0.034668	-0.0078125	-0.092773	46.0059	-5.87445	43.772	0.45547	-0.28496	0.1377
0.948	46.697	41.4665	1148.44	-1.863	0.59058	-0.34204	32.152	-22.452	1457.781	-2.3062	0.71045	-0.51807	-46.574	35.3715	12.3765	-0.053711	0.0053711	-0.07666	33.27	-8.8419	31.3202	0.46728	-0.28848	0.13242
0.95	47.344	38.6408	1119.681	-1.8394	0.57959	-0.33838	-12.422	23.562	1429.901	-2.3006	0.7434	-0.51514	-43.7244	22.788	13.7162	-0.062012	0.0083008	-0.068848	13.186	2.20675	34.959	0.47021	-0.28369	0.12451
0.952	57.349	44.0004	1107.282	-1.8047	0.57129	-0.32715	-28.782	-1.518	1383.11984	-2.291	0.77832	-0.51172	-49.41	39.219	-6.25758	-0.083008	0.021973	-0.055664	-4.385	2.9041	51.284	0.46006	-0.27959	0.11807
0.954	65.452	47.6759	1100.3431	-1.7852	0.56641	-0.32422	46.272	10.9663	1380.8377	-2.2671	0.82471	-0.50928	-31.339	19.3597	3.514	-0.092041	0.029297	-0.043945	58.2111	-2.158	50.4054	0.43769	-0.26426	0.11006
0.956	68.308	47.4083	1073.3444	-1.7417	0.56201	-0.31152	67.267	90.9749	1351.049	-2.252	0.83594	-0.50684	-41.311	44.666	9.9343	-0.104	0.03418	-0.034668	31.2959	-14.58318	23.689	0.40059	-0.2252	0.096387
0.958	71.817	48.0107	1043.6952	-1.7019	0.55591	-0.30469	53.45	2.605	1354.461	-2.2065	0.84619	-0.49365	-24.1644	9.7913	19.7011	-0.11279	0.04541	-0.019531	12.729	-27.8375	41.3429	0.39717	-0.18564	0.10381
0.96	55.191	64.306	1011.9902	-1.666	0.5498	-0.29688	33.16	20.9414	1368.846	-2.1726	0.83716	-0.48511	-36.707	30.0341	-8.068	-0.12158	0.044434	-0.016113	20.604	-38.7563	63.60284	0.39941	-0.15137	0.10352
0.962	69.372	85.58	1001.285	-1.6167	0.54541	-0.28467	-9.233	51.966	1328.9453	-2.1304	0.82275	-0.47412	-23.707	2.14617	22.3158	-0.12598	0.051758	0.0063477	-35.149	-66.6672	86.9365	0.40362	-0.11807	0.092969
0.964	83.045	84.051	997.378	-1.5864	0.5415	-0.27881	30.439	11.358	1343.2146	-2.082	0.7793	-0.4502	-20.025	16.93357	8.3312	-0.12573	0.053466	0.017578	2.533	-49.464	111.352	0.38848	-0.088867	0.074218
0.966	45.907	94.07	961.4673	-1.5332	0.5293	-0.27344	33.134	103.6645	1321.13	-2.0605	0.75391	-0.44727	-10.307	-5.6463	37.4597	-0.12695	0.054688	0.02832	-5.579	-91.347	159.841	0.37012	-0.049024	0.04961
0.968	23.873	97.001	931.8781	-1.493	0.51538	-0.26734	18.562	80.819	1277.4468	-2.0176	0.71289	-0.43066	13.744	37.531	20.7741	-0.11816	0.047852	0.043457	-18.1617	-99.362	198.697	0.33984	-0.0073243	0.022168
0.97	14.785	98.9697	908.5801	-1.4512	0.50293	-0.26563	42.798	64.481	1233.994	-1.9839	0.68799	-0.41578	25.241	26.6509	8.4024	-0.10938	0.045898	0.053711	-56.799	-127.3295	268.748	0.30908	0.030762	0.0024414
0.972	28.903	90.593	897.90742	-1.4019	0.48291	-0.25732	27.96	113.6921	1169.7123	-1.9487	0.67139	-0.3999	23.54	50.975	5.409	-0.091797	0.036621	0.059082	-56.624	-96.466	367.5413	0.27099	0.074414	-0.017188
0.974	1.645	99.5407	888.2355	-1.3745	0.47607	-0.25195	21.201	43.395	1169.025	-1.8921	0.65576	-0.37842	7.8722	15.899	15.572567	-0.07251	0.023682	0.070801	-66.968	-48.291	493.661	0.23418	0.11162	-0.030371
0.976	22.681	107.583	857.05	-1.3315	0.45947	-0.23779	72.0974	101.046	1164.9544	-1.8691	0.65039	-0.37207	15.63	40.212	13.2663	-0.054688	0.0097656	0.074707	-73.689	-2.04547	671.769	0.19199	0.15302	-0.041309
0.978	18.799	99.7866	824.616	-1.3052	0.45264	-0.22802	83.654	138.531	1131.324	-1.8184	0.64063	-0.35303	39.86707	23.95383	30.781	-0.032715	-0.010742	0.075195	-39.834	53.652	826.509	0.14424	0.19433	-0.048535
0.98	10.759	104.1	805.332	-1.2773	0.44629	-0.2207	91.6356	97.072	1104	-1.7749	0.63769	-0.33203	52.267	51.785	22.8732	-0.023438	-0.021484	0.076172	-94.491	65.447	962.683	0.10059	0.22168	-0.052246
0.982	-0.500999999999998	112.994	796.4353	-1.2432	0.43945	-0.20508	100.0431	187.204	1070.319	-1.7324	0.63379	-0.32031	23.7088	26.8579	31.719	-0.0024414	-0.043457	0.07373	-89.459	42.5922	1120.953	0.044727	0.24873	-0.054395
0.984	26.932	119.229	777.8633	-1.2241	0.43896	-0.2041	68.63	170.36	1046.2692	-1.6733	0.63916	-0.30225	27.148	45.9673	19.6599	0.0090332	-0.052735	0.075439	-128.851	2.096	1257.615	-0.009961	0.27647	-0.054687
0.986	52.846	111.304	750.6924	-1.1855	0.43262	-0.19336	71.322	151.79582	1050.699	-1.6421	0.64111	-0.2959	14.532	15.3262	11.9607	0.018555	-0.071289	0.07666	-101.52	-27.224	1380.278	-0.060352	0.29365	-0.059375
0.988	19.931	112.891	722.2331	-1.1548	0.43018	-0.18872	63.2634	209.397	1028.0676	-1.5757	0.64307	-0.27881	29.395	34.3668	18.3549	0.03418	-0.081543	0.073242	-64.949	-70.945	1432.49	-0.10312	0.31309	-0.051953
0.99	4.91	121.252	707.028	-1.1226	0.42578	-0.18701	17.5938	113.889	997.7746	-1.521	0.64014	-0.26733	16.792	19.2852	37.9542	0.040527	-0.087891	0.077637	-23.6187	-109.615	1391.144	-0.14014	0.32666	-0.045898
0.992	4.047	126.888	697.882	-1.0796	0.42432	-0.18164	1.47	136.1373	963.826	-1.4624	0.63135	-0.25586	18.222	27.43779	33.4849	0.058105	-0.10254	0.076172	20.684	-182.156	1342.579	-0.17598	0.33652	-0.039551
0.994	19.095	125.934	686.7	-1.0581	0.42432	-0.17773	-14.348	139.7105	924.939	-1.3828	0.61523	-0.23682	-10.8027	0.460600000000001	36.81	0.072022	-0.11133	0.072266	25.212	-278.353	1280.888	-0.2082	0.34727	-0.033985
0.996	18.683	119.779	664.161	-1.0195	0.41406	-0.17236	9.292	94.761	886.3426	-1.3457	0.60156	-0.22656	-13.679	8.672	15.5191	0.089355	-0.11768	0.072754	73.972	-336.193	1281.276	-0.23594	0.3543	-0.033203
0.998	1.414	115.44245	632.0495	-0.99319	0.41309	-0.16431	2.606	194.524	846.885	-1.2788	0.56592	-0.19727	-27.911	-14.0114	26.878	0.11279	-0.12939	0.069824	99.044	-363.3	1252.5718	-0.25127	0.36318	-0.029785
1	13.924	116.92	602.842	-0.9624	0.40771	-0.15625	-14.662	164.493	803.184	-1.2295	0.5415	-0.1831	-19.154	4.924	35.475	0.12354	-0.13477	0.064453	125.77791	-340.993	1242.932	-0.26855	0.375	-0.030273
1.002	21.049	134.481	559.1694	-0.92041	0.40186	-0.15771	-20.02	152.867	788.0415	-1.1777	0.51367	-0.1626	-33.122	-0.32	33.17	0.14746	-0.14648	0.058594	94.3844	-341.141	1269.179	-0.27656	0.38711	-0.030274
1.004	30.429	130.869	545.0419	-0.89844	0.39844	-0.15283	-33.5555	207.495	766.38	-1.1133	0.4751	-0.13428	-22.548	27.849	23.1708	0.16797	-0.1582	0.054443	37.822	-342.841	1292.147	-0.28398	0.39267	-0.038867
1.006	15.252	117.382	532.65927	-0.85352	0.38672	-0.14404	-9.481	128.414	740.049	-1.0796	0.45752	-0.13037	-49.170327	17.1287	13.8077	0.18555	-0.16895	0.047852	45.4646	-304.343	1321.662	-0.28555	0.39736	-0.047461
1.008	29.384	106.456	515.11	-0.8169	0.37256	-0.14331	-13.879	193.711	727.336	-1.0117	0.42236	-0.11328	-31.597	21.4969	14.8719	0.2041	-0.17871	0.036621	53.3768	-266.125	1364.6371	-0.28672	0.39355	-0.062012
1.01	38.653	100.982	486.79	-0.77881	0.35889	-0.13818	-23.9356	199.396	679.818	-0.95947	0.39892	-0.097169	-50.9164	13.387	22.7812	0.21191	-0.18311	0.030762	89.1038	-168.63	1407.559	-0.2832	0.39063	-0.083008
1.012	23.785	107.734	482.961	-0.73828	0.33398	-0.13623	-66.346	130.155	641.7615	-0.9082	0.37109	-0.080078	-23.122	23.496	6.6781	0.22705	-0.18848	0.015625	69.6685	-145.876	1453.134	-0.28603	0.38525	-0.1043
1.014	12.868	122.805	474.677	-0.7124	0.32471	-0.12646	-83.817	212.485	597.953	-0.83887	0.33447	-0.062012	-41.645	20.2691	1.497	0.2268	-0.19434	0.010254	98.152	-165.367	1458.857	-0.29511	0.37588	-0.11445
1.016	6.004	137.088	457.627	-0.67578	0.30518	-0.12012	-67	169.554	570.116	-0.80615	0.31689	-0.053223	-10.291	28.4932	15.5732	0.22217	-0.19629	0.003418	63.7394	-226.9085	1447.681	-0.32637	0.3626	-0.13203
1.018	12.4	127.223	419.864	-0.64722	0.29102	-0.11572	-34.0393	158.364439	554.974	-0.74463	0.28174	-0.033691	-16.932	16.4885	7.1362	0.21338	-0.18848	-0.00097656	81.4437	-300.334	1445.562	-0.37861	0.33711	-0.14521
1.02	-22.471	106.66658	393.4047	-0.62256	0.2832	-0.1123	-17.0779	186.877	519.438	-0.69898	0.25952	-0.019287	-12.892	19.3643	1.4846	0.20215	-0.18555	-0.0014648	56.991	-336.699	1456.856	-0.44629	0.31738	-0.1543
1.022	-22.619	96.8813	383.7898	-0.58789	0.27246	-0.10254	-23.5693	85.81	476.537	-0.65576	0.23877	-0.0097656	13.801	21.804	-11.1595	0.18701	-0.1665	0.0014648	10.601	-351.747	1484.3392	-0.53428	0.28975	-0.16015
1.024	-25.427	95.5964	371.904	-0.56592	0.25928	-0.095215	-24.7607	140.8296	436.969	-0.59961	0.21484	0.0039063	5.292	31.7704	0.18998	0.15967	-0.14844	0.0014648	-64.197	-333.355	1488.97	-0.64346	0.26299	-0.16299
1.026	17.409	94.246	371.729	-0.53467	0.24854	-0.092773	-14.4293	129.618	420.134	-0.57178	0.19775	0.013672	11.86	28.5428	10.7834	0.14404	-0.13428	0.0024414	-82.981	-362.677	1531.8219	-0.77315	0.23877	-0.17392
1.028	-11.987	89.666	347.296	-0.50659	0.23974	-0.088623	19.7965	78.031	417.1766	-0.51367	0.18115	0.027344	24.3601	35.1081	32.944	0.11182	-0.10547	0.0029297	-43.074	-316.823	1557.618	-0.93056	0.21787	-0.19316
1.03	-16.728	90.643	312.31639	-0.47803	0.22949	-0.085938	39.2289	146.675	388.294	-0.47168	0.1582	0.034424	35.138	34.0655	11.1951	0.088867	-0.080566	0.0085449	-66.007	-264.835	1596.681	-1.1133	0.21777	-0.2124
1.032	-8.317	84.225	285.19157	-0.44531	0.2168	-0.08252	23.558615	97.2732	356.537	-0.4292	0.14307	0.039551	51.97067	18.4225	39.144	0.064453	-0.056152	0.011719	-56.678	-168.566	1624.5445	-1.3154	0.22734	-0.21231
1.034	-12.879	92.31	280.9859	-0.42773	0.20996	-0.082031	10.58	130.211	342.155	-0.37549	0.11279	0.04541	22.032	10.0792	7.7804	0.039063	-0.028809	0.016602	-77.596	-71.347	1625.637	-1.548	0.25576	-0.20205
1.036	-11.535	93.837	286.21298	-0.38965	0.19385	-0.075195	-3.346	180.183	300.399	-0.35059	0.10596	0.046387	29.854	14.8951	28.5182	0.026367	-0.014648	0.0078125	-80.577	-26.677	1648.599	-1.798	0.3003	-0.18838
1.038	-11.222	98.444	277.288	-0.36084	0.18383	-0.068848	-7.819	98.091	279.7466	-0.30713	0.087891	0.047363	21.893	39.385	1.3992	0.0043945	0.0087891	0.01709	-56.302	7.73099999999999	1630.614	-2.0619	0.33467	-0.17158
1.04	-0.149000000000001	86.8892	255.727	-0.33203	0.17676	-0.0625	14.288	129.4461	251.0298	-0.2749	0.080078	0.055665	38.046	39.118	26.075	-0.0043946	0.026611	0.010986	-18.79549	-27.937	1624.04	-2.3296	0.38428	-0.17188
1.042	-35.315	90.663	231.657	-0.30322	0.15771	-0.064453	7.2164	92.85	210.5235	-0.25049	0.070801	0.062012	31.388	35.352	20.5864	-0.012207	0.039063	0.0058594	-43.331	-40.278	1615.6264	-2.5605	0.44746	-0.18272
1.044	-21.366	83.971	240.134	-0.28467	0.14795	-0.063477	-1.8616	38.537	197.8487	-0.21533	0.062988	0.064453	14.422	24.7435	29.5014035	-0.01709	0.054199	-0.00048828	-90.879	-67.762	1592.4696	-2.7426	0.52129	-0.19677
1.046	-8.34200000000001	72.3688	232.303	-0.25732	0.13623	-0.058594	-21.3718	102.1539	164.735	-0.19434	0.057129	0.064941	-5.022	28.5614	6.176	-0.016113	0.053223	-0.0078125	-101.689	-66.536	1583.7346	-2.8484	0.61075	-0.196
1.048	-1.769	79.389	215.0207	-0.24048	0.12476	-0.061768	-13.7725	70.061	141.3681	-0.15967	0.042969	0.070313	-13.406	28.709	32.3028	-0.011719	0.058105	-0.023438	-126.874	-84.363	1571.4621	-2.8918	0.7125	-0.19336
1.05	3.926	77.478	192.515	-0.22852	0.12305	-0.067383	-6.241	82.684	128.993	-0.13306	0.036622	0.075439	-6.988	50.603	23.6378	-0.0070801	0.056153	-0.038574	-49.585	-96.931	1575.827	-2.8882	0.82959	-0.17725
1.052	-0.0829999999999984	58.6896	182.6307	-0.23486	0.12451	-0.083008	0.628999999999998	125.716	91.221	-0.10205	0.032715	0.074219	-16.075	30.296	45.82	-0.00097656	0.051758	-0.058105	-38.854	-117.627	1585.615	-2.8703	0.95195	-0.15645
1.054	25.553	43.4544	187.658	-0.2124	0.11865	-0.057129	-21.19	63.048	88.123	-0.069336	0.016602	0.075195	-16.174	25.0989	8.8635	0.0063477	0.041016	-0.078613	-15.6357	-115.578	1596.686	-2.8378	1.0626	-0.13593
1.056	15.329	50.9566	161.2508	-0.15137	0.097168	-0.029297	-27.09	103.878	83.2294	-0.055664	0.013672	0.075195	-37.3592	-8.0039	27.183	0.0097656	0.035645	-0.091797	-43.2838	-76.422	1620.906	-2.7976	1.1231	-0.12773
1.058	24.457	59.617	150.4032	-0.10962	0.073731	-0.01001	-44.3509	94.455	86.8077	-0.019531	0.012695	0.06543	-34.441	12.599	32.7124	0.015625	0.022949	-0.12012	-27.961	-65.443	1630.966	-2.7736	1.1424	-0.14453
1.06	13.399	61.991	137.3584	-0.077637	0.052734	-0.0019531	-48.2281	55.97642	87.24801	0.0070802	0.0065918	0.064209	-45.187	-12.0733	93.771	0.02417	0.012696	-0.1355	8.8197	-10.492	1609.938	-2.7417	1.1235	-0.16016
1.062	-2.837	65.633	138.807	-0.073242	0.040039	-0.015137	-46.7143	92.78	51.7195	0.032227	0.0073242	0.062012	-40.142	5.646	101.111	0.024902	0	-0.15869	35.2814	-19.603	1546.316	-2.6976	1.0435	-0.17373
1.064	3.433	65.373	144.577	-0.074219	0.037598	-0.020996	-54.4312	29.81993	23.299	0.058105	-0.003418	0.05127	-22.171	18.4653	147.4744	0.026367	-0.010254	-0.17139	38.8466	14.077	1489.9434	-2.6637	0.92383	-0.17891
1.066	-10.977	69.95	133.9119	-0.062012	0.035156	-0.014648	-50.446	27.2886	29.0114	0.071777	-0.0029297	0.047363	-6.148	52.556	160.7816	0.028809	-0.017578	-0.18604	24.0611	29.5162	1442.3923	-2.6386	0.7918	-0.19843
1.068	11.312	59.369	122.0049	-0.052002	0.036621	-0.01001	-30.509	72.826	16.5233	0.095215	-0.010254	0.039063	-13.411	44.9359	252.71	0.035156	-0.022949	-0.20898	-0.186999999999999	54.897	1387.031	-2.6516	0.67041	-0.21592
1.07	-2.374	63.898	106.2714	-0.040039	0.035645	-0.003418	-11.174	31.9826	20.7678	0.10083	-0.0087891	0.018066	12.196	61	284.4384	0.037354	-0.03125	-0.22559	0.713	95.165	1357.756	-2.6973	0.57178	-0.23438
1.072	17.705	62.005	92.4802	-0.034668	0.039551	-0.0068359	-10.273	70.152	32.7682	0.10742	-0.0083008	0.0097656	1.294	49.2495	345.2696	0.042969	-0.037598	-0.24121	-4.147	79.61834	1319.378	-2.7833	0.51103	-0.254
1.074	-18.635	58.106	79.9342	-0.03418	0.047852	-0.0068359	-14.3816	40.6439	10.703	0.1543	-0.018555	0.029297	24.745	84.454	388.5383	0.056152	-0.041992	-0.25732	12.447	85.4288	1290.126	-2.8903	0.49707	-0.26973
1.076	-6.48099999999999	50.961	68.5996	-0.03418	0.057617	-0.016113	6.809	-7.8829	29.06133	0.17188	-0.030762	0.035645	32.918	94.536	480.377	0.060059	-0.044922	-0.26807	-13.649	82.169	1265.3465	-2.9969	0.53574	-0.2877
1.078	14.888	47.412	57.0692	-0.025391	0.06543	-0.015869	7.386	39.022	20.4307	0.19531	-0.048828	0.032715	44.582	107.958	593.506	0.069336	-0.053711	-0.2876	-51.022	106.03111	1223.736	-3.0826	0.61504	-0.30127
1.08	4.145	51.113	63.6061	-0.016602	0.07373	-0.017578	21.943	12.025	29.282	0.20239	-0.052978	0.023438	38.805	71.518	691.0065	0.074707	-0.056641	-0.30298	-67.777	129.513	1200.9033	-3.1382	0.71533	-0.31299
1.082	-18.884	48.969	69.4485	0.00097656	0.071777	-0.022461	37.493	31.08	56.775	0.20801	-0.052246	0.016602	68.381	60.926	779.935	0.084961	-0.060547	-0.31738	-8.9375	162.957	1192.083	-3.1622	0.81534	-0.31514
1.084	-31.043	51.878	55.9043	0.0068359	0.070801	-0.025391	11.695	60.59	34.788	0.20947	-0.047363	0.0029297	52.101	-16.8387	861.752	0.086426	-0.069336	-0.34521	-15.73295	176.865	1184.998	-3.1542	0.90772	-0.30928
1.086	0.450000000000003	52.689	54.2975	0.021484	0.074219	-0.033203	22.246	7.3156	23.0878	0.2124	-0.044434	0.0019531	65.587	-55.984	965.3883	0.07959	-0.074707	-0.37451	-22.133	161.613	1179.7739	-3.1358	0.97842	-0.30537
1.088	-33.351	54.961	53.6223	0.032715	0.075195	-0.039307	22.847	40.934	27.8575	0.21533	-0.041504	0.0039063	66.751	-136.9656	1019.464	0.053223	-0.078125	-0.41064	-18.3414	173.924	1151.683	-3.1178	1.0267	-0.30742
1.09	-25.005	42.178	65.8761	0.045898	0.07373	-0.040527	12.582	26.3259	13.3835	0.22021	-0.036621	5.204e-15	103.448	-139.756	1040.317	0.010498	-0.060303	-0.43335	-29.434	171.999	1126.217	-3.0977	1.0781	-0.31445
1.092	-2.66500000000001	28.574	54.795	0.058594	0.064941	-0.047363	45.7363	-4.527	36.0716	0.22314	-0.037109	-0.0043945	98.1905	-159.251	1015.454	-0.065918	-0.037598	-0.4585	-28.076	193.829	1101.082	-3.0895	1.109	-0.31387
1.094	2.642	26.755	42.146	0.0625	0.064941	-0.050293	44.8916	38.19	26.8531	0.23291	-0.030273	-0.012695	77.477	-162.644	1020.492	-0.20752	0.015137	-0.48877	-16.849	182.961	1066.044	-3.0808	1.125	-0.31016
1.096	-20.184	40.565	37.756	0.067871	0.062012	-0.060059	26.225	-8.7362	20.1484	0.24023	-0.03125	-0.013184	10.9003	-204.684	1029.435	-0.28418	0.04834	-0.4917	-4.104	159.973	1023.923	-3.0719	1.1278	-0.29961
1.098	-7.138	39.239	37.9829	0.076904	0.059082	-0.06665	29.9264	0.2006	35.2993	0.25049	-0.031738	-0.02002	-13.983	-160.885	1053.571	-0.45898	0.11426	-0.49268	-34.056	139.838	962.976	-3.054	1.1171	-0.28818
1.1	21.043	34.683	29.491	0.085938	0.054688	-0.066895	15.763	24.3448	26.175	0.26221	-0.034668	-0.028321	-37.323	-162.887	1096.8022	-0.60279	0.16626	-0.48193	-27.998	144.972	930.181	-3.0176	1.0977	-0.27344
1.102	14.527	40.023	16.7384	0.087891	0.050293	-0.075684	13.009	-15.7747	29.0864	0.26855	-0.039063	-0.040039	-41.2571	-141.499	1163.702	-0.75732	0.2251	-0.47217	-15.959	200.1006	875.583	-2.9606	1.0659	-0.25703
1.104	0.0229999999999961	35.839	22.4747	0.09082	0.050781	-0.072754	13.985	41.556	33.475	0.28662	-0.041504	-0.050781	-67.593	-183.728	1187.445	-0.97021	0.31104	-0.44092	16.708	233.787	846.909	-2.8984	1.0286	-0.2418
1.106	-4.906	23.6313	28.9589	0.09375	0.050293	-0.07666	-24.48	37.92	14.9243	0.29297	-0.044922	-0.057617	-105.038	-191.6428	1222.334	-1.0864	0.35791	-0.41553	35.1735	267.33	813.3989	-2.8339	0.99152	-0.22734
1.108	8.393	27.4642	34.847	0.093018	0.053711	-0.076661	-22.561	1.6232	20.0103	0.29785	-0.045898	-0.071777	-131.242	-203.912	1201.229	-1.2676	0.43311	-0.29346	42.635	242.8917	767.763	-2.7706	0.9544	-0.2166
1.11	13.392	45.651	33.9092	0.096191	0.054199	-0.07959	-37.181	21.654	21.1802	0.30005	-0.047852	-0.076172	-79.7473	-134.34	1238.636	-1.5505	0.54614	-0.29468	56.2639	232.8618	722.323	-2.7129	0.91992	-0.20752
1.112	-2.599	50.56	28.0639	0.097168	0.04834	-0.07666	-32.439	-22.7865	23.7507	0.29932	-0.051758	-0.083496	-51.966	-116.72	1283.819	-1.8511	0.70068	-0.28174	71.469	238.463	703.381	-2.6501	0.89522	-0.20381
1.114	28.634	35.115	19.5588	0.095215	0.041992	-0.075684	-8.09	-10.8742	35.2741	0.29541	-0.046875	-0.095703	-41.3952	-61.92	1332.291	-2.2754	0.9248	-0.2334	101.0665	253.152	665.507	-2.584	0.87149	-0.19453
1.116	13.056	30.964	23.6633	0.095703	0.036621	-0.075195	-23.798	18.3071	7.5516	0.29199	-0.04834	-0.10205	-54.6355	-130.047	1340.8245	-2.4976	1.0688	-0.2085	66.93	231.035	614.12732	-2.5106	0.84414	-0.17969
1.118	24.283	33.4079	25.7583	0.094971	0.033203	-0.071777	-37.484	-11.8879	9.99999999997669e-05	0.28516	-0.046387	-0.10693	-64.331	-166.5774	1378.8755	-2.8555	1.3398	-0.15723	70.424	191.3016	548.32	-2.4309	0.81787	-0.16494
1.12	-2.51	32.5026	28.1478	0.099609	0.036133	-0.071289	-33.913	21.6487	-2.4136	0.27881	-0.040772	-0.11255	-83.466	-243.11	1422.5852	-2.9676	1.509	-0.12964	60.699	164.03	491.126	-2.3511	0.79346	-0.14697
1.122	21.235	17.6732	26.824836	0.094238	0.037598	-0.076172	-21.114	26.3292	11.181	0.27051	-0.034668	-0.11475	-90.374	-248.313	1473.215	-2.9585	1.5903	-0.12793	73.816	132.957	462.10726	-2.2685	0.76816	-0.12842
1.124	16.165	14.6456	17.5558	0.093262	0.039551	-0.069824	-6.388	-1.564	16.1335	0.25781	-0.022949	-0.11963	-98.1635	-272.943	1495.63	-2.6367	1.3506	-0.20947	77.1139	158.2594	414.0805	-2.1821	0.73691	-0.11328
1.126	13.185	14.6259	22.1497	0.10547	0.040527	-0.068848	-10.221	19.4699	5.4806	0.25146	-0.011719	-0.11914	-74.6798	-249.411	1528.103	-2.3257	1.1499	-0.25684	70.978	151.003	393.384	-2.0879	0.70293	-0.10156
1.128	-10.442	19.1676	10.9817	0.10889	0.047363	-0.075684	-21.0069	-4.4709	0.3324	0.23535	0.0048828	-0.11768	-68.3154	-241.852	1523.5656	-1.896	1.2173	-0.44482	82.042	175.9886	343.438	-2.0015	0.66768	-0.090918
1.13	-16.51	34.192	17.0492	0.10986	0.04834	-0.07959	-12.405	-2.9024	8.1665	0.22314	0.016601	-0.12182	-22.355	-204.391	1566.1185	-2.0056	1.427	-0.55737	63.915	169.3724	289.8323	-1.9082	0.62305	-0.081543
1.132	3.566	39.459	35.863	0.12061	0.044922	-0.074219	14.424	43.04	8.0554	0.21094	0.024414	-0.12402	24.79	-154.0691	1590.89	-2.1602	1.541	-0.52002	49.854	160.852	285.586	-1.8074	0.58291	-0.080371
1.134	-12.36	29.0233	40.121	0.12475	0.039795	-0.075439	14.193	-2.22	19.327	0.18945	0.037109	-0.12109	46.576	-104.039	1619.5938	-2.2188	1.4707	-0.4834	51.648	178.012	270.6891	-1.7051	0.53652	-0.079101
1.136	-32.446	14.3463	47.185	0.12939	0.038086	-0.074219	21.033	33.3573	25.9879	0.17603	0.05127	-0.11865	99.7674	-37.76	1607.615	-2.2065	1.354	-0.5415	48.669	169.744	256.5949	-1.6059	0.49121	-0.075586
1.138	-4.068	17.0788	25.458	0.13428	0.02832	-0.071777	18.5596	34.992	-12.4903	0.16113	0.067871	-0.12109	148.09	-12.016	1602.782	-2.0835	1.0864	-0.64404	17.781	187.314	223.714	-1.5019	0.44766	-0.07666
1.14	6.412	27.3663	10.6295	0.13379	0.03125	-0.071777	37.6883	0.29084	10.6375	0.14063	0.086914	-0.1167	155.467	7.61199999999999	1596.216	-1.905	0.88208	-0.6648	1.018	200.921	186.4084	-1.4038	0.40576	-0.080078
1.142	-23.322	30.1091	25.1044	0.13574	0.022949	-0.068359	32.2174	56.824	11.0683	0.12793	0.09082	-0.11865	147.842	-30.008	1614.777	-1.7437	0.68311	-0.66748	4.361	203.869	157.0697	-1.3045	0.36582	-0.08125
1.144	-21.267	27.433	25.07122	0.13134	0.023926	-0.065186	36.5943	23.3219	-0.772	0.11279	0.11084	-0.11572	106.3577	-20.796	1571.414	-1.7261	0.38428	-0.61865	-16.248	180.142	135.39	-1.2051	0.32734	-0.0875
1.146	-0.336999999999996	20.2548	25.7898	0.13135	0.025879	-0.062012	46.5605	15.9519	16.1178	0.095459	0.12207	-0.11304	59.1598	-41.4562	1593.227	-1.7461	0.36914	-0.63184	9.909	156.442	112.2631	-1.1129	0.29063	-0.091406
1.148	-7.98	20.4819	4.12923	0.13135	0.032227	-0.05957	21.688	45.083	-3.5211	0.083984	0.13623	-0.10791	25.305	-18.5886	1555.227	-1.916	0.48047	-0.63086	-8.516	143.108	83.907	-1.0242	0.25596	-0.093164
1.15	-20.824	10.0068	26.496	0.12744	0.02832	-0.054199	17.518	-4.8886	5.7469	0.064453	0.15186	-0.10889	57.2071	-56.954	1588.3697	-2.0141	0.56787	-0.58423	-10.94	110.091	81.567	-0.94141	0.22168	-0.093262
1.152	-4.071	8.25367	35.275	0.12549	0.040527	-0.052734	24.314	37.985	31.7703	0.059082	0.16357	-0.11133	86.978	-9.5917	1577.968	-2.1108	0.65674	-0.58936	-23.184	96.222	94.384	-0.85918	0.1875	-0.098047
1.154	15.997	26.553	35.288	0.12158	0.041748	-0.045411	4.07	34.023	20.9222	0.04248	0.17871	-0.098633	74.857	-46.4809	1610.971	-2.2397	0.76611	-0.63818	-40.358	55.282	92.95	-0.78223	0.15625	-0.1001
1.156	-3.185	34.744	35.36	0.1167	0.047852	-0.041504	12.458	16.1689	25.7509	0.03418	0.19384	-0.098144	98.871	-8.1381	1620.58	-2.3052	0.82373	-0.6499	-0.740000000000002	55.826	102.795	-0.71856	0.12149	-0.10439
1.158	-12.867	22.3426	19.7298	0.11523	0.051758	-0.03418	-4.185	59.755	26.8911	0.023926	0.20703	-0.091797	48.985	-69.305	1633.369	-2.4609	0.9668	-0.63916	9.343	31.8208	96.749	-0.64892	0.093945	-0.10127
1.16	14.24	5.0143	38.06	0.11182	0.056152	-0.03418	-14.001	18.0595	-8.9258	0.011719	0.22217	-0.088867	46.394	-33.5697	1617.424	-2.5772	1.0957	-0.63477	4.386	37.422	86.725	-0.57861	0.071289	-0.1084
1.162	6.561	6.4905	31.3456	0.10791	0.067871	-0.031738	-29.458	23.1955	22.968	0.0083008	0.22852	-0.08252	48.0865	-50.6025	1614.389	-2.6743	1.2192	-0.64795	-15.0123	30.064	76.781	-0.51534	0.052246	-0.10576
1.164	11.768	11.359	27.28236	0.097412	0.073486	-0.029541	-12.946	55.113	30.365	0.003418	0.24463	-0.07666	43.394	39.568	1565.3573	-2.7461	1.3398	-0.67188	20.794	-5.590161	75.537	-0.44707	0.028808	-0.11738
1.166	7.862	17.77098	23.2236	0.091797	0.083496	-0.028809	-23.453	-2.6943	29.597	-0.00048828	0.25244	-0.07837	-15.939	38.3723	1555.0796	-2.7515	1.3735	-0.68701	23.191	-0.6884	56.712	-0.3873	0.006543	-0.12402
1.168	26.754	18.5219	10.8702	0.082031	0.09375	-0.03125	-17.418	40.6955	27.5527	-0.0029297	0.26123	-0.072754	-65.824	109.994	1505.511	-2.6948	1.3481	-0.73975	32.275	-33.001	39.137	-0.32002	-0.0064454	-0.13105
1.17	18.517	29.2455	18.7716	0.07959	0.10498	-0.035645	-28.5021	22.93538	20.7164	-0.0019531	0.26855	-0.067383	-79.4043	72.892	1493.367	-2.5991	1.2832	-0.76612	62.6721	-24.6289	-0.887999999999998	-0.27295	-0.013672	-0.14502
1.172	4.791	17.9048	63.1759	0.067383	0.1167	-0.041504	-38.6304	-5.834	16.31	-0.0019531	0.27197	-0.063965	-74.908	139.511	1477.171	-2.5015	1.2915	-0.80811	0.384999999999998	-31.529	-37.8647	-0.22695	-0.019922	-0.15927
1.174	-6.286	-10.6727	159.8883	0.060791	0.12989	-0.048584	-33.677	41.3324	29.1603	-0.00048828	0.27832	-0.060547	-45.5106	87.351	1476.9505	-2.4839	1.3579	-0.82178	0.457999999999998	6.888	-20.32645	-0.1628	-0.029492	-0.15713
1.176	15.813	-33.2558	209.886	0.050293	0.14258	-0.057129	-14.568	15.8319	23.0353	0.0024414	0.2815	-0.057129	-33.398	124.6603	1442.248	-2.5171	1.3794	-0.82275	32.281	20.9961	11.9753	-0.092089	-0.047461	-0.14814
1.178	20.325	-29.9047	217.783	0.03418	0.15674	-0.065918	-13.929	16.7424	41.289	0.0039063	0.28564	-0.055664	-21.048	93.81	1419.075	-2.5601	1.3872	-0.80225	34.1063	25.1571	24.2557	-0.033789	-0.069922	-0.14121
1.18	-66.029	-22.64	215.2771	0.024902	0.1626	-0.07373	-13.291	24.6023	30.6945	0.0078125	0.28271	-0.047852	-36.772	142.142	1372.408	-2.5435	1.3603	-0.81397	24.7701	23.0497	12.204	0.018555	-0.088379	-0.13818
1.182	-73.85	-56.238	290.115	-0.0097656	0.17139	-0.10107	-19.3326	-18.17248	28.739	0.0058594	0.27832	-0.044922	-5.062	117.46	1324.048	-2.4917	1.3091	-0.82373	29.333	8.1774	-3.8149	0.057227	-0.11162	-0.14532
1.184	-5.6351	-107.819	364.1458	-0.035645	0.17969	-0.12842	-1.248	28.4742	38.7117	0.012207	0.2793	-0.043457	43.167	148.799	1323.561	-2.3647	1.2085	-0.82861	-5.651	38.8567	-14.8819	0.085938	-0.12324	-0.15547
1.186	-5.591	-130.216	414.3201	-0.071777	0.18701	-0.15381	14.522	22.6788	20.6513	0.019287	0.27661	-0.043945	49.912	107.506	1301.85	-2.293	1.1582	-0.82227	-2.462	37.399	9.3932	0.11875	-0.13691	-0.16015
1.188	-50.307	-143.287	444.1574	-0.13232	0.20605	-0.19434	19.459	-11.7791	37.035	0.02002	0.2749	-0.040527	52.45	127.039	1303.722	-2.189	1.0415	-0.80615	42.259	54.283	18.6513	0.15156	-0.1539	-0.15556
1.19	-82.582	-93.9487	476.801	-0.17188	0.21582	-0.21191	23.65	15.2489	23.2742	0.029785	0.27148	-0.041504	84.2477	95.237	1288.998	-2.1504	0.96484	-0.78271	-2.568	14.6563	-11.245	0.18311	-0.17188	-0.15088
1.192	-72.538	-24.057	527.827	-0.27295	0.24512	-0.23389	-3.028	-27.79	45.379	0.03125	0.27002	-0.044434	40.386	142.3247	1259.677	-2.1538	0.88135	-0.74365	-0.173999999999999	2.6288	-8.9243	0.20654	-0.18936	-0.15742
1.194	-39.9307	30.693	559.7873	-0.35815	0.26392	-0.25683	47.3068	-53.6451	111.2963	0.036133	0.26514	-0.053223	91.309	123.83	1200.3627	-2.1328	0.88477	-0.73926	-9.518	10.1522	-8.0504	0.2208	-0.2	-0.16143
1.196	-20.723	59.132	614.729	-0.4502	0.28662	-0.27246	49.7729	-62.808	158.1785	0.036377	0.26001	-0.068359	70.6392	136.378	1171.898	-2.1167	0.90088	-0.72803	-40.532	21.9379	26.02714	0.23408	-0.21016	-0.16064
1.198	-5.65	51.1461	671.2564	-0.58154	0.32324	-0.28174	4.332	-84.584	201.747	0.026855	0.25049	-0.089844	76.7389	115.379	1107.044	-2.0405	0.90771	-0.69678	-33.3324	58.2082	42.318	0.23242	-0.22295	-0.16162
1.2	-61.9729	44.826	702.095	-0.65186	0.34229	-0.27881	-1.198	-43.165	288.017	0.003418	0.24951	-0.12598	60.592	146.057	1099.851	-1.9874	0.89063	-0.68457	-24.609	33.6755	43.919	0.23047	-0.23047	-0.15771
1.202	-72.741	46.021	753.028	-0.80469	0.38867	-0.28418	-42.6492	-74.578	349.639	-0.016113	0.25195	-0.14648	89.045	158.823	1025.3807	-1.9297	0.86914	-0.6748	-11.982	33.0861	17.8889	0.21787	-0.23095	-0.15332
1.204	-62.2088	53.89	785.394	-0.93481	0.43823	-0.29614	-36.7266	-126.5357	446.002	-0.097656	0.25293	-0.16992	62.147	202.247	1010.152	-1.8613	0.83984	-0.63086	-22.0172	15.3668	17.3371	0.20117	-0.22813	-0.14834
1.206	14.776	43.573	782.4726	-1.0742	0.48926	-0.30469	-90.33778	-117.1367	474.457	-0.17919	0.25366	-0.18969	75.1875	217.061	922.246	-1.8233	0.83105	-0.60352	-21.489	36.28	42.423	0.1793	-0.22344	-0.14326
1.208	40.2342	7.434	782.357	-1.2578	0.57422	-0.30469	-106.51814	-158.933	464.795	-0.27734	0.25488	-0.20068	30.014	234.28	902.29	-1.7969	0.82422	-0.58203	-28.46	54.209	62.938	0.1499	-0.21211	-0.13115
1.21	21.211	-44.672	762.415	-1.3354	0.61182	-0.29541	-82.256	-134.449	505.308	-0.43311	0.26123	-0.19922	42.162	248.711	849.27	-1.7637	0.81641	-0.54297	-7.385	48.673	64.645	0.11328	-0.19727	-0.11768
1.212	-32.011	-71.531	795.701	-1.4922	0.68945	-0.28809	-93.261	-61.466	538.941	-0.52686	0.26221	-0.20264	28.787	261.214	847.33	-1.7417	0.81885	-0.52881	-5.801	43.346	36.345	0.075977	-0.18164	-0.10186
1.214	-3.276	-94.002	853.2124	-1.616	0.74145	-0.2976	-28.494	-51.3009	596.443	-0.71777	0.27539	-0.1875	36.566	265.817	823.607	-1.6953	0.79883	-0.49023	-13.546	0.7453	18.3083	0.033789	-0.16152	-0.078223
1.216	55.6266	-98.678	903.319	-1.7285	0.80469	-0.30615	31.677	14.2348	636.644	-0.8628	0.28858	-0.17187	-28.439	254.74761	814.834	-1.6543	0.78515	-0.46093	-0.707999999999998	13.6025	34.8686	-0.017774	-0.14355	-0.066504
1.218	67.481	-108.2149	942.117	-1.855	0.88721	-0.32861	-22.994	24.241	636.218	-1.0137	0.30957	-0.15283	-59.9434	251.431	728.47195	-1.6089	0.77002	-0.43115	-8.271	-6.1887	52.539	-0.072168	-0.12373	-0.045117
1.22	40.718	-138.537	963.478	-1.9063	0.92969	-0.34082	-52.783	8.992	691.4879	-1.228	0.34229	-0.15137	-104.9	232.607	678.417	-1.5308	0.75049	-0.40088	14.384	12.94808	37.2178	-0.125	-0.10303	-0.025879
1.222	21.232	-153.219	959.713	-1.9512	1.002	-0.35547	-43.3257	44.018	730.59	-1.3359	0.36719	-0.15576	-96.546	227.0018	603.228	-1.4858	0.74072	-0.39014	20.9234	-16.3742	8.732	-0.17041	-0.084961	-0.0063476
1.224	1.177	-121.777	996.2576	-1.938	1.0356	-0.34473	-23.5	29.9872	755.90912	-1.5527	0.43848	-0.17285	-100.793	206.531	612.7509	-1.3921	0.72021	-0.3584	25.35	-31.613	9.0919	-0.2128	-0.064161	0.012109
1.226	-3.155	-85.0092	1058.1681	-1.9077	1.0532	-0.34717	-1.512	24.025	795.79791	-1.7029	0.50903	-0.18482	-91.516	226.885	547.749	-1.3179	0.69971	-0.3396	13.867	-24.80752	12.1263	-0.24912	-0.046192	0.034766
1.228	23.798	-81.969	1127.138	-1.8242	1.0371	-0.33887	-14.398	16.501	814.8943	-1.8472	0.58643	-0.19629	-102.058	196.6556	532.4229	-1.248	0.67969	-0.31348	32.407	-29.4576	33.956	-0.283	-0.027539	0.048731
1.23	35.9752	-104.702	1136.001	-1.7734	1.0098	-0.33008	-34.79	-46.762	838.865	-2.0122	0.69971	-0.21045	-95.314	209.689	482.142	-1.1665	0.63867	-0.2749	59.0867	16.0355	47.5327	-0.30322	-0.0087891	0.061035
1.232	21.832	-136.479	1107.075	-1.6768	0.92969	-0.30811	-16.367	-64.491	882.235	-2.0776	0.76416	-0.2085	-81.97	179.932	479.257	-1.1265	0.62354	-0.26416	33.093	6.3323201	19.6701	-0.31934	0.005957	0.075391
1.234	1.517	-125.873	1108.859	-1.6089	0.8379	-0.29029	35.3913	-84.142	906.793	-2.1611	0.87207	-0.21484	-68.234	216.804	437.6146	-1.0444	0.604	-0.23926	34.9757	16.00426	4.466	-0.32178	0.015332	0.083008
1.236	-2.771	-79.219	1125.265	-1.5562	0.73877	-0.26904	90.698	-157.53802	943.825	-2.1806	0.94434	-0.21411	-47.5131	211.908	425.588	-0.98437	0.57715	-0.21167	-2.312	11.9215	-21.0669	-0.31982	0.022754	0.095117
1.238	6.001	-28.464	1155.358	-1.5112	0.61182	-0.24316	100.946	-158.1266	994.639	-2.1797	1.002	-0.22656	1.086	246.883	391.525	-0.92871	0.55469	-0.19238	12.657	33.2887	-18.3434	-0.30244	0.025879	0.10488
1.24	5.192	-24.175	1171.51	-1.5137	0.55664	-0.23291	87.865	-220.894	999.298	-2.1323	1.0542	-0.23975	-38.937	206.129	362.271	-0.85791	0.53369	-0.16748	7.31	45.452	4.387	-0.28271	0.021973	0.1084
1.242	-49.8296	-68.7785	1207.02	-1.5347	0.46338	-0.21338	55.669	-270.789	1041.81	-2.1016	1.0684	-0.24756	-46.121	201.235	320.5271	-0.82227	0.51953	-0.15674	14.307	28.419	4.1362	-0.26162	0.0125	0.1126
1.244	-42.783	-77.32	1246.241	-1.572	0.41406	-0.2002	67.173	-228.626	1077.978	-2.0273	1.0625	-0.26953	-49.1135	142.826	295.9418	-0.75586	0.49609	-0.13818	-14.399	35.2049	-19.9464	-0.22901	-0.0016602	0.11973
1.246	-36.828	-71.014	1291.726	-1.623	0.37939	-0.19336	49.9909	-255.149	1165.3	-1.9711	1.0122	-0.28321	-18.2043	151.438	255.822	-0.70752	0.47852	-0.12818	-17.336	18.4248	-5.1656	-0.19189	-0.020411	0.11738
1.248	-43.813	-49.634	1316.812	-1.7109	0.37598	-0.17725	62.0116	-217.979	1267.354	-1.9233	0.93799	-0.29736	14.042	116.2566	237.682	-0.65625	0.46387	-0.11914	-4.406	45.494	39.846	-0.15889	-0.039453	0.12705
1.25	-72.063	-42.815	1325.357	-1.7593	0.38281	-0.17041	48.981	-161.1844	1250.371	-1.8628	0.79736	-0.30859	39.5862	140.598	202.803	-0.59033	0.43799	-0.104	1.236	38.218	38.78	-0.12842	-0.063965	0.13086
1.252	-51.8102	-52.408	1313.914	-1.8667	0.44287	-0.18018	43.062	-162.75	1267.135	-1.8394	0.7251	-0.30078	29.3532	103.718	175.106	-0.56396	0.43018	-0.093262	-0.788	58.678	29.7388	-0.10293	-0.088379	0.13174
1.254	-5.833	-83.6119	1318.811	-1.9519	0.51489	-0.19311	45.3089	-88.779	1274.544	-1.8296	0.59033	-0.30029	60.16929	125.003	135.6599	-0.51563	0.40332	-0.080078	-5.575	43.2825	-0.4874	-0.076856	-0.11611	0.13311
1.256	-30.337	-106.282	1348.86	-2.0386	0.59717	-0.2085	3.607	-75.829	1278.5423	-1.8506	0.52099	-0.29932	68.336	63.87986	120.76	-0.47998	0.38403	-0.071289	-35.728	32.71941	4.3171	-0.046777	-0.13877	0.13896
1.258	1.897	-90.514	1356.4756	-2.1543	0.72461	-0.24219	24.777	-83.923	1331.4273	-1.894	0.46924	-0.30127	66.4016	86.164	118.26	-0.44629	0.36768	-0.061523	-40.9054	34.4675	37.849	-0.02041	-0.1585	0.13741
1.26	-1.937	-56.981	1351.9538	-2.2065	0.7876	-0.25244	20.663	-55.523	1336.0089	-1.9824	0.44629	-0.31592	44.607	59.1895	114.538	-0.40771	0.34717	-0.054199	-33.182	4.933	71.815	0.0092773	-0.1748	0.14063
1.262	-25.7236	-39.316	1344.726	-2.3047	0.91211	-0.28027	5.127	-88.9269	1350.1428	-2.0288	0.46143	-0.31592	28.352	105.005	100.767	-0.39209	0.33447	-0.047363	-10.726	13.77602	61.122	0.034082	-0.18642	0.13858
1.264	-56.628	-35.409	1343.695	-2.3609	0.99855	-0.29541	-6.156	-96.6183	1411.725	-2.125	0.51563	-0.32715	2.851	81.81	79.129	-0.35889	0.32471	-0.043457	-16.436	0.529199999999999	51.219	0.063281	-0.19766	0.12988
1.266	-35.1397	-36.5407	1360.881	-2.4116	1.0786	-0.31201	-40.9468	-51.07	1419.8753	-2.1921	0.57739	-0.34229	19.863	94.544	50.2236	-0.33691	0.31372	-0.037109	-16.085	21.8427	36.5602	0.091407	-0.20547	0.12949
1.268	-2.095	-18.9237	1364.278	-2.4683	1.1646	-0.33447	-54.564	-98.119	1480.317	-2.2554	0.65088	-0.36328	-6.188	32.7159	25.1491	-0.31689	0.30615	-0.030762	-8.643	23.949	35.6432	0.11817	-0.21084	0.11992
1.27	-7.479	2.7128	1359.274821	-2.502	1.207	-0.35352	-79.1926	-75.334	1518.443	-2.3315	0.74658	-0.38818	-33.311	34.11902	1.201	-0.29443	0.29102	-0.024414	9.373	28.011	53.787	0.13672	-0.21191	0.11035
1.272	-53.948	15.09703	1377.3727	-2.564	1.2856	-0.40381	-106.651	-87.5306	1505.393	-2.3652	0.79492	-0.40088	-46.5683	1.217	-14.6833	-0.27979	0.28467	-0.017578	16.524	12.2905	30.21079	0.15586	-0.20615	0.10654
1.274	-61.298	17.05552	1380.708	-2.5935	1.3479	-0.42651	-63.7458	-143.797	1548.899	-2.4395	0.88037	-0.4209	-41.9181	33.565	3.008	-0.25977	0.271	-0.0087891	4.402	-17.9655	11.8536	0.19414	-0.2085	0.10567
1.276	-33.647	19.4391	1365.1991	-2.6113	1.4023	-0.4502	-10.682	-97.568	1565.899	-2.4939	0.93335	-0.43603	-35.279	12.7498	-6.5652	-0.24414	0.26099	-0.0063476	11.877	3.181	1.3867	0.22734	-0.2167	0.099414
1.278	4.742	6.278	1358.932	-2.6055	1.4473	-0.45801	-25.824	-115.348	1557.0412	-2.5527	0.98438	-0.45068	-51.853	24.8363	1.551	-0.22949	0.24854	0.0029297	26.781	1.4956	5.9162	0.25401	-0.22275	0.089551
1.28	5.327	-17.566	1375.5553	-2.5874	1.4556	-0.45703	-31.3464	-104.283	1584.023	-2.6245	1.0278	-0.45654	-47.9	-5.03	-21.2158	-0.20459	0.229	0.019043	14	18.955	28.6363	0.27441	-0.22705	0.06543
1.282	3.972	-20.43	1382.107	-2.5483	1.4438	-0.46582	-35.77366	-41.555	1556.782	-2.6636	1.0454	-0.45752	-72.1834	15.335	0.818499999999998	-0.19873	0.22363	0.022949	19.982	-6.6362	31.6181	0.28799	-0.23545	0.048926
1.284	-23.796	-17.824	1369.684	-2.5125	1.4231	-0.47192	-41.864	-66.0901	1557.406	-2.7461	1.082	-0.47461	-70.9298	22.239	22.2682	-0.18115	0.20557	0.030762	41.679	5.3725	20.2096	0.29727	-0.24326	0.030664
1.286	-61.756	-16.42696	1339.4342	-2.4722	1.396	-0.46631	6.675	-7.234	1572.184	-2.7979	1.1113	-0.47852	-58.9271	68.545	52.68	-0.16772	0.18921	0.040284	31.6838	-6.923	-1.79614	0.30508	-0.2503	0.016992
1.288	-69.818	-21.1914	1367.9334	-2.4116	1.3501	-0.4502	10.825	30.6258	1536.72	-2.8394	1.1333	-0.47412	-33.442	46.55	37.8578	-0.15918	0.17188	0.043457	34.91	-0.6872	11.2525	0.30058	-0.25537	0.0058593
1.29	-30.463204	-20.6151	1368.6453	-2.3823	1.3228	-0.43994	16.205	19.9829	1551.1015	-2.877	1.1602	-0.46387	-39.1232	34.6715	36.767	-0.13477	0.15771	0.052246	6.43	23.0093	8.5075	0.28711	-0.26563	-0.0043945
1.292	-40.6242	-15.383	1333.7938	-2.334	1.2666	-0.42773	17.7986	66.164	1546.5047	-2.8867	1.1699	-0.45996	-33.898	9.54035	2.8328	-0.12451	0.14063	0.054199	8.275	1.8415	25.876	0.27022	-0.26221	-0.018359
1.294	-80.212	-9.1681	1327.397	-2.3035	1.2336	-0.42139	-7.4911	54.3978	1509.608	-2.877	1.1836	-0.44385	-30.991	21.5975	8.6491	-0.10693	0.12451	0.066406	15.776	-1.763	43.948	0.24267	-0.26309	-0.022949
1.296	-101.797	4.65008	1326.867	-2.2695	1.1953	-0.4126	7.8315	41.7328	1544.757	-2.8581	1.1834	-0.43457	-4.213	31.5234	12.2598	-0.098634	0.1106	0.072266	20.421	-46.3392	46.058	0.20986	-0.2541	-0.024903
1.298	-75.557	42.384	1329.565	-2.2261	1.1606	-0.40723	49.6774	87.228	1529.448	-2.8335	1.1812	-0.42627	15.912	51.405	35.651	-0.091797	0.098145	0.082031	-9.013	-10.255	80.443	0.17041	-0.24356	-0.026465
1.3	-55.774	58.99	1304.2923	-2.2026	1.1489	-0.40332	46.638	46.821	1552.3019	-2.7949	1.168	-0.41211	44.1826	44.5311	28.7988	-0.083984	0.081055	0.091309	-24.1215	40.5055	138.059	0.12305	-0.22656	-0.03418
1.302	-68.322	51.6061	1274.107	-2.1641	1.1172	-0.3916	48.7768	63.107	1569.811	-2.7749	1.1567	-0.40234	42.541	20.637	42.142	-0.083008	0.072754	0.092773	7.466	72.726	205.2618	0.077246	-0.19961	-0.042286
1.304	-43.354	48.316	1264.3642	-2.1385	1.0969	-0.38331	26.1712	82.368	1513.78486	-2.7324	1.1367	-0.38379	60.2264	5.596	17.661	-0.079102	0.052246	0.099609	7.044	75.538	243.6541	0.03291	-0.16973	-0.04668
1.306	-53.36	54.503	1251.0598	-2.1108	1.0815	-0.37061	5.7461	40.0066	1529.965	-2.6978	1.1075	-0.37622	34.547	-6.0254	29.5925	-0.07959	0.040039	0.10962	7.39100000000001	60.785	284.5442	-0.0041993	-0.13848	-0.050586
1.308	-46.226	80.315	1233.6405	-2.0742	1.0605	-0.354	39.264	76.906	1546.6481	-2.6655	1.0728	-0.35791	60.8211	23.596	29.1148	-0.078125	0.027832	0.11426	-37.119	67.163	346.49	-0.034277	-0.10439	-0.060449
1.31	-60.061	74.053	1241.737	-2.045	1.0361	-0.34424	-10.9138	50.1881	1513.152	-2.6309	1.0273	-0.33594	57.5694	13.72794	43.468	-0.073242	0.0092773	0.12695	-19.978	78.578	450.4732	-0.062012	-0.070801	-0.078125
1.312	-41.7474	48.07	1248.562	-2.0176	1.0156	-0.33398	-4.675	34.062	1529.561	-2.6113	1.0078	-0.32422	67.1254	30.7765	37.117	-0.074219	0.003418	0.125	-42.8948	113.484	578.822	-0.077832	-0.046094	-0.087012
1.314	-44.6776	36.1084	1209.657	-1.9707	0.98828	-0.33105	-3.188	99.1131	1483.493	-2.5815	0.99365	-0.29932	38.472	-13.745	37.8169	-0.061523	-0.012695	0.13965	-39.57314	89.616	696.834	-0.085938	-0.022656	-0.10967
1.316	-53.1179	30.374	1172.423	-1.9429	0.98096	-0.32178	-67.342	77.1878	1465.2311	-2.5562	0.9917	-0.28467	41.8482	15.2529	8.4028	-0.05127	-0.022461	0.1499	-17.075	74.442	802.1942	-0.094531	-0.0074219	-0.12724
1.318	-54.849	42.524	1164.0917	-1.8945	0.95264	-0.31396	-32.26941	120.054	1481.267	-2.5195	0.98633	-0.27295	4.168	-8.8517	25.761	-0.032715	-0.036133	0.16455	-41.4958	11.85351	885.582	-0.09209	0.0011719	-0.14678
1.32	-31.7201	56.9767	1180.146	-1.8589	0.92627	-0.30102	-57.784	169.192	1415.5643	-2.4565	0.97705	-0.25586	7.967	46.30149	11.7363	-0.003418	-0.057129	0.18018	-25.23	-36.9342	983.5105	-0.086426	0.0063477	-0.16846
1.322	-10.5259	66.026	1166.7061	-1.8242	0.8916	-0.29102	-71.63	142.33	1410.5134	-2.4194	0.96338	-0.24854	-19.99	2.7187	11.6741	0.01123	-0.071289	0.18066	-19.109	-53.725	1085.033	-0.083301	0.0053711	-0.18252
1.324	-12.9886	52.384	1114.4668	-1.7866	0.85791	-0.27393	-42	196.922	1383.516	-2.3574	0.93359	-0.23242	-3.291	30.5692	-1.1799	0.053223	-0.094238	0.18701	13.522	-97.253	1156.921	-0.078614	0.0018554	-0.20371
1.326	-11.167	56.112	1083.6028	-1.7593	0.84033	-0.26367	-87.394	170.99	1335.5765	-2.3122	0.90698	-0.22412	-31.602	-26.4077	-9.8603	0.082031	-0.11402	0.18701	33.224	-121.752	1162.851	-0.069629	-0.0083006	-0.21582
1.328	25.607	77.055	1073.411	-1.7241	0.80322	-0.24414	-50.8653	148.04	1340.7461	-2.2637	0.88086	-0.20898	-19.949	17.355	2.8367	0.11768	-0.13525	0.19043	51.0257	-184.777	1122.815	-0.063281	-0.020703	-0.22832
1.33	34.71	111.653	1062.813	-1.6963	0.78028	-0.23218	-38.8082	195.339	1312.724	-2.1831	0.85205	-0.20068	-57.713	-9.50379	11.56678	0.16406	-0.17139	0.17529	10.0288	-223.381	1109.561	-0.053711	-0.033203	-0.23486
1.332	13.47	116.671	1043.1563	-1.6636	0.76709	-0.22266	-66.95	137.127	1296.1498	-2.1387	0.83691	-0.19727	-62.8521	67.709	16.6833	0.18701	-0.1875	0.16943	-23.0671	-268.945	1125.286	-0.050098	-0.049903	-0.23613
1.334	-16.7384	110.698	1025.42709	-1.6172	0.75586	-0.21143	-46.7091	136.8114	1296.851	-2.041	0.80664	-0.19629	-65.1781	36.6355	27.2854	0.22998	-0.21729	0.15381	-28.852	-241.775	1139.912	-0.050781	-0.062793	-0.23672
1.336	-14.23	89.9194	986.98939	-1.5859	0.75391	-0.21045	-35.8575	165.548	1252.201	-1.9567	0.78296	-0.19825	-48.161	74.664	1.8761	0.26416	-0.24609	0.13257	-26.377	-209.862	1141.519	-0.053516	-0.07334	-0.23789
1.338	-34.865	86.259	960.48101	-1.5298	0.73877	-0.19971	-35.7392	125.3083	1234.752	-1.8789	0.75098	-0.19336	-55.36485	6.8179	12.9261	0.29541	-0.26563	0.11621	-13.6885	-207.21	1139.806	-0.057324	-0.082519	-0.24033
1.34	-38.106	105.3563	945.43872	-1.4861	0.73267	-0.19751	17.042	179.549	1217.264	-1.7773	0.7041	-0.18408	-36.282	34.1892	2.48235	0.33057	-0.28955	0.094238	-44.176	-194.951	1135.1276	-0.063477	-0.089355	-0.24414
1.342	-16.179	123.057	937.5511	-1.437	0.71533	-0.1875	-26.45112	155.07929	1160.7019	-1.7085	0.66406	-0.17163	-63.2968	-25.706	13.6622	0.34619	-0.30029	0.088379	-65.3629	-196.218	1148.588	-0.065039	-0.091895	-0.24834
1.344	-2.999	133.944	892.35037	-1.373	0.69336	-0.18164	-13.571	122.24	1141.467	-1.6504	0.62891	-0.15723	-38.172	37.4307	19.71486	0.37549	-0.31396	0.064941	-57.074	-110.058	1146.485	-0.072363	-0.090039	-0.25733
1.346	-36.3396	118.07	873.162	-1.3433	0.67432	-0.17969	30.2428	172.7688	1103.62	-1.5684	0.57617	-0.14453	-35.116	1.9778	12.8742	0.3916	-0.3191	0.051758	-17.196	-67.65	1193.993	-0.079004	-0.083789	-0.26826
1.348	-54.321	96.259	866.849	-1.2827	0.64502	-0.18115	25.787	138.25	1063.57	-1.5327	0.55713	-0.14355	3.968	60.459	12.1459	0.40479	-0.31445	0.042969	-3.974	-1.44999999999999	1243.072	-0.10801	-0.077832	-0.28115
1.35	-22.984	97.057	866.918	-1.2363	0.62061	-0.16455	76.881	183.0412	1063.663	-1.4487	0.521	-0.13623	25.89	9.30382	30.082	0.41357	-0.30859	0.027344	-17.347	-44.82	1268.82116	-0.1626	-0.069824	-0.28955
1.352	0.941000000000003	118.972	841.1793	-1.1973	0.59375	-0.1626	61.0957	232.744	991.1272	-1.387	0.48999	-0.13159	38.02	51.697	21.40224	0.41553	-0.3042	0.023926	11.5807	-110.454	1307.1673	-0.24932	-0.05664	-0.29736
1.354	0.343	132.27	814.3064	-1.1372	0.55615	-0.15918	29.906	193.7218	957.137227	-1.3203	0.45703	-0.12793	9.236	13.8553	30.8843	0.41406	-0.28223	0.015137	-6.2922	-165.351	1320.501	-0.36397	-0.046875	-0.29229
1.356	-44.584	123.363	788.699	-1.104	0.53955	-0.15234	63.8785	247.656	924.5463	-1.2437	0.42041	-0.11377	29.615	64.764	35.99	0.40429	-0.26196	0.0070801	-43.803	-199.391	1360.58304	-0.50146	-0.0375	-0.27549
1.358	-41.8915	125.696	765.024	-1.0488	0.50293	-0.15234	23.111	205.3056	878.6823	-1.209	0.39844	-0.11279	54.6978	22.1503	30.0822	0.39551	-0.23682	0.00048828	-38.1089	-181.8182	1408.328	-0.66006	-0.025	-0.23623
1.36	-31.869	120.283	739.5166	-1.0051	0.47925	-0.1521	44.5694	187.084	853.249	-1.1362	0.36279	-0.099121	64.2928	41.211	42.096	0.37549	-0.20459	-0.0073242	-63.51	-198.521	1431.445	-0.83545	-0.0092773	-0.19287
1.362	-25.457	126.557	717.0548	-0.96289	0.45313	-0.14941	50.4884	228.8509	799.87203	-1.0889	0.33594	-0.095459	60.3322	-8.98473	28.5325	0.3623	-0.17773	-0.0087891	-64.7846	-185.605	1433.0426	-1.0319	0.016699	-0.14873
1.364	-26.409	120.777	725.006	-0.90967	0.4292	-0.15137	14.154	181.921	747.656	-1.0415	0.31934	-0.087402	57.148	31.134	22.82408	0.33594	-0.13232	-0.0092773	-20.427	-226.218	1474.6971	-1.2352	0.040429	-0.11025
1.366	-18.125	127.6673	695.148	-0.88037	0.41455	-0.14746	25.932	210.0325	735.3862	-0.96875	0.28125	-0.076172	42.005	17.53087	22.5905	0.30981	-0.10059	-0.010742	-36.774	-187.613	1520.3723	-1.4508	0.088867	-0.091113
1.368	2.441	123.5288	633.359	-0.82959	0.3833	-0.14209	-0.323	223.589	690.3651	-0.93652	0.27002	-0.079102	12.686	43.129	25.8957	0.2876	-0.067871	-0.01123	-12.236	-148.518	1587.757	-1.6744	0.16074	-0.096973
1.37	1.814	114.7962	604.72891	-0.79322	0.36597	-0.13477	-6.055	185.5857	668.251	-0.86475	0.23975	-0.078613	40.173	22.0616	19.7422	0.25684	-0.024414	-0.015625	39.071	-72.556	1607.248	-1.9077	0.26221	-0.12451
1.372	8.088	114.299	615.1942	-0.75586	0.34863	-0.13428	17.712	224.499	644.38222	-0.80688	0.22241	-0.075684	32.835	17.4514	42.137	0.24072	-0.0024414	-0.01709	49.41	-7.547	1608.063	-2.1142	0.38506	-0.13701
1.374	39.538	130.494	597.265	-0.71387	0.32959	-0.12695	-10.213	183.6295	606.8937	-0.74951	0.20361	-0.072754	28.336	-10.404	7.5497	0.21143	0.039551	-0.016602	102.9439	-0.768000000000001	1594.935	-2.2635	0.50967	-0.12451
1.376	51.6323	134.151	558.8172	-0.69238	0.32129	-0.13184	-6.975	188.882	594.535	-0.67969	0.16797	-0.071289	3.023	-6.4944	17.5441	0.1897	0.06836	-0.019287	113.1801	33.651	1581.036	-2.3807	0.60732	-0.12295
1.378	34.167	139.041	512.6737	-0.64551	0.30615	-0.13086	-9.171	220.09	550.528	-0.63477	0.1543	-0.058105	-10.852	-2.426	14.55084	0.17188	0.09375	-0.019043	126.2871	12.118	1574.788	-2.4806	0.70283	-0.15576
1.38	12.018	126.281	511.2099	-0.60693	0.29175	-0.13037	-36.17	159.76956	505.829	-0.56689	0.11426	-0.058105	-53.169	17.72192	19.7857	0.14893	0.12939	-0.018555	84.171	52.2895	1556.821	-2.5347	0.80127	-0.20654
1.382	26.573	126.747	500.472	-0.56982	0.28271	-0.12988	-22.63	185.471	466.7142	-0.52246	0.088135	-0.056153	-29.491	27.2693	20.3997	0.12988	0.13965	-0.020508	62.8891	37.644	1549.371	-2.5505	0.87295	-0.28115
1.384	31.78	119.2237	490.209	-0.51709	0.2583	-0.12939	-28.028	205.797	427.3375	-0.47705	0.064453	-0.04834	-56.0331	20.904	27.0824	0.10693	0.16699	-0.025391	49.7836	13.457	1541.882	-2.519	0.94151	-0.35117
1.386	20.932	107.747	465.6076	-0.49365	0.25049	-0.13086	-39.2354	169.743	416.0355	-0.41602	0.032715	-0.044434	-41	20.8468	11.4596	0.083008	0.19287	-0.012207	47.993	-26.71	1527.407	-2.4484	0.97939	-0.41094
1.388	11.648	90.381	447.674	-0.44922	0.22168	-0.12988	19.526	207.217	394.671	-0.39746	0.020508	-0.042969	-65.6162	5.041564	26.1077	0.068359	0.2002	-0.010742	64.102	-61.971	1564.019	-2.349	0.99121	-0.44004
1.39	14.054	91.4826	414.478	-0.41797	0.2063	-0.125	-19.687	163.7518	357.272	-0.34961	-0.0068359	-0.044922	-76.12584	24.0905	-5.8434	0.041016	0.22217	-0.0083008	70.14613	-36.515	1569.393	-2.2378	0.95361	-0.46143
1.392	6.82	91.9247	389.4726	-0.38818	0.18799	-0.12207	2.008	158.211	351.7199	-0.3147	-0.020264	-0.039063	-70.5573	11.7928	-1.8164	0.023193	0.23633	-0.0026856	69.9309	-31.6374	1591.696	-2.1449	0.84726	-0.48281
1.394	32.93	101.582	382.5162	-0.35352	0.16748	-0.12158	44.225	195.2	306.5869	-0.27881	-0.033691	-0.040039	-43.553	39.5369	-7.2506	0.0043945	0.24512	0.0039063	67.89	6.2374	1590.411	-2.0659	0.6872	-0.48037
1.396	10.594	98.632	355.6954	-0.3374	0.15479	-0.11719	-4.236	152.656	291.953	-0.22754	-0.05957	-0.039551	-37.996	-8.63853	-0.229999999999999	-0.022461	0.26123	0.010742	71.419	17.8217	1569.2794	-2.0073	0.51299	-0.46162
1.398	2.305	99.809	326.9866	-0.30518	0.13428	-0.12256	48.869	183.066	277.80093	-0.20215	-0.066895	-0.040527	-18.867	24.258	6.4305	-0.031738	0.26709	0.012207	57.2661	48.197	1555.548	-1.9721	0.34726	-0.4291
1.4	8.232	92.482	309.303	-0.28223	0.1272	-0.11499	56.3816	181.723	253.5429	-0.15625	-0.088379	-0.047852	-12.093	-3.2052	43.5697	-0.049805	0.27393	0.024902	70.438	56.165	1514.728	-1.9868	0.20508	-0.41113
1.402	-11.199	89.42	314.478	-0.26855	0.11865	-0.11377	40.424	131.314	266.888	-0.12744	-0.10987	-0.050293	-19.615	25.014	73.459	-0.062256	0.28125	0.031739	30.392	101.874	1479.9251	-2.0565	0.10185	-0.40098
1.404	-9.546	88.94	318.938	-0.25879	0.11133	-0.13525	74.17592	174.953	238.083	-0.098633	-0.12939	-0.056152	-13.563	-13.048	140.0929	-0.077148	0.28613	0.035156	-17.124	141.686	1426.078	-2.1628	0.052441	-0.40107
1.406	-6.495	85.969	298.709	-0.26416	0.11475	-0.14453	45.21882	124.555	216.467	-0.070801	-0.15088	-0.063477	15.105	14.252	171.594	-0.092773	0.29443	0.046875	-29.571	151.949	1414.339	-2.2937	0.066895	-0.39092
1.408	-23.404	91.622	260.0441	-0.21533	0.10938	-0.12305	40.083	102.85623	195.66167	-0.05957	-0.15771	-0.064453	0.466999999999999	-18.6902	275.16467	-0.10254	0.29883	0.055176	-42.2868	203.25	1374.021	-2.4243	0.14268	-0.38389
1.41	-45.262	94.248	243.59144	-0.1748	0.087158	-0.10888	53.3424	125.0373	177.002	-0.060547	-0.1582	-0.095215	12.854	0.232000000000003	353.144	-0.11279	0.30859	0.074707	-48.821	173.6807	1351.2506	-2.5444	0.25879	-0.3833
1.412	-23.139	100.205	230.568	-0.1416	0.070313	-0.095215	46.109	76.1738	166.3755	-0.055908	-0.15893	-0.093994	-5.4173	-80.666	492.625	-0.125	0.31323	0.074707	-35.809	220.182	1312.8857	-2.6226	0.38974	-0.396
1.414	5.957	93.689	222.0961	-0.093262	0.049316	-0.09082	54.3581	96.4137	147.843	-0.022949	-0.16406	-0.06543	-59.32577	-54.245	578.698	-0.12988	0.31982	0.078613	-30.885	217.443	1280.60534	-2.6723	0.52227	-0.41152
1.416	-2.201	67.639	233.03	-0.077637	0.043945	-0.098145	37.9441	99.451	119.543	0.011719	-0.19678	-0.041504	-74.0246	-113.7737	633.241	-0.1377	0.3291	0.083496	-45.771	237.12	1271.3223	-2.6957	0.64102	-0.43067
1.418	1.175	52.9	220.09	-0.053223	0.027832	-0.10107	9.323	49.3722	127.14	0.023438	-0.19922	-0.036133	-63.0039	-56.166	665.492	-0.14063	0.33691	0.086914	-48.5007	251.328	1222.0869	-2.6949	0.73623	-0.45195
1.42	-11.393	49.034	188.1892	-0.041993	0.019776	-0.1062	26.679	100.766	106.623	0.021973	-0.19922	-0.03125	-7.8562	-99.4329	725.73	-0.14209	0.3501	0.09082	-13.341	214.264	1217.685	-2.6812	0.80127	-0.47021
1.422	5.988	60.595	166.6528	-0.022949	0.013184	-0.10547	3.141	79.155	90.8454	0.013184	-0.18604	-0.041748	33.269	-31.569	764.097	-0.14087	0.34912	0.091797	6.239	209.606	1216.204	-2.6689	0.83496	-0.49453
1.424	12.949	68.931	190.804	0.00097656	-0.0039063	-0.098145	3.061	76.977	96.26	0.0073242	-0.17188	-0.039063	69.94	-85.259	794.474	-0.14014	0.35205	0.087891	26.382	176.793	1218.256	-2.6777	0.84463	-0.53779
1.426	26.944	77.278	178.4668	0.017578	-0.0097656	-0.090332	-0.705000000000002	82.909	68.484	0.0043945	-0.15234	-0.035156	69.892	10.7855	817.969	-0.13525	0.34082	0.0625	29.8917	214.083	1176.8691	-2.6839	0.84463	-0.56905
1.428	33.997	76.012	158.7201	0.032715	-0.022949	-0.09668	-50.416	21.911	67.5239	-0.0053711	-0.1416	-0.027832	30.94	-41.56911	846.58545	-0.13818	0.33594	0.040527	-2.142	223.3062	1134.394	-2.6772	0.82197	-0.59014
1.43	15.87	77.406	134.32158	0.047607	-0.025879	-0.10279	-24.551	49.253	59.444	-0.0058594	-0.11475	-0.017578	-13.875	19.848	859.109	-0.14746	0.31934	-0.0039063	6.2002	228.76	1097.666	-2.6621	0.79688	-0.60156
1.432	3.517	65.0599	142.9156	0.058594	-0.034668	-0.097168	-48.352275	48.416	26.3457	-0.0061035	-0.096924	-0.0053711	29.715	-81.467	879.852	-0.17382	0.31543	-0.04956	27.1461	205.063	1095.473	-2.6448	0.76201	-0.59092
1.434	8.227	64.125	155.066	0.074707	-0.041504	-0.092285	-43.785	13.4925	47.9926	-0.0083008	-0.079102	0.0024414	41.992	-72.01	885.033	-0.20654	0.31006	-0.09375	19.888	183.624	1038.453	-2.6262	0.71992	-0.58515
1.436	32.317	61.195	131.184	0.079102	-0.046875	-0.090332	-16.565	43.408	29.586	-0.0043945	-0.058105	0.0087891	43.834	-151.166	946.627	-0.27979	0.31543	-0.15625	28.805	196.108	965.903	-2.6027	0.67149	-0.58594
1.438	38.149	63.837	104.0258	0.082031	-0.056641	-0.094727	-49.5787	8.5595	11.40439	-0.0048828	-0.05127	0.02002	-33.173	-129.14	973.13	-0.32764	0.30811	-0.18311	56.0584	191.235	893.9075	-2.5652	0.6291	-0.58203
1.44	37.621	57.73	95.2302	0.074463	-0.050048	-0.099367	-28.6616	7.9393	28.893	0.00048828	-0.041016	0.027832	-43.264	-149.7	960.815	-0.44482	0.31055	-0.24805	8.9244	241.306	820.434	-2.5151	0.59521	-0.57764
1.442	15.186	53.788	79.1766	0.070801	-0.049805	-0.099121	-12.5334	20.3242	10.2885	0.0029297	-0.03955	0.033203	-20.208	-136.288	941.356	-0.55078	0.32056	-0.29614	17.434	253.14	795.053	-2.4541	0.5709	-0.56797
1.444	8.306	71.896	71.4382	0.068359	-0.044434	-0.087402	-36.6627	-19.8363	24.4676	0.0029297	-0.039551	0.041016	35.792	-193.961	962.963	-0.66846	0.34326	-0.33203	38.2542	297.281	747.943	-2.4035	0.5584	-0.56289
1.446	15.637	82.751	61.336	0.066895	-0.040039	-0.080566	-7.581	0.4654	35.422	0.0024414	-0.039551	0.045898	57.02	-193.7894	1044.6068	-0.82959	0.37695	-0.34521	48.417	300.763	701.771	-2.366	0.54824	-0.55195
1.448	6.634	76.651	78.6433	0.062988	-0.036133	-0.076172	-1.6	9.2434	-3.38629	-0.0039063	-0.042969	0.044922	74.4882	-235.337	1134.028	-0.87598	0.37891	-0.29883	40.039	289.42	667.5486	-2.3407	0.53955	-0.53916
1.45	2.301	63.012	74.367	0.053467	-0.030762	-0.069581	-8.84	1.6105	1.3866	-0.0097656	-0.047363	0.053711	48.578	-264.041	1194.645	-1.1133	0.43164	-0.3291	16.3743	301.277	632.679	-2.314	0.53174	-0.52686
1.452	1.887	47.3775	60.713	0.044434	-0.020996	-0.06543	33.54	39.323	6.1473	-0.019043	-0.056397	0.057129	10.995	-303.959	1225.895	-1.3201	0.49121	-0.32739	-51.3441	279.356	600.12	-2.2782	0.52549	-0.51455
1.454	1.24	47.246	77.54	0.039551	-0.012695	-0.059082	8.55	18.7773	-0.7355	-0.026367	-0.064941	0.059082	-6.389	-318.846	1262.899	-1.521	0.5708	-0.30957	-49.2268	290.408	549.9632	-2.2319	0.51455	-0.49639
1.456	-17.382	45.29	84.848	0.035156	-0.0053711	-0.056641	16.534	18.8151	20.601	-0.039551	-0.069824	0.072266	11.309	-305.396	1303.907	-1.7944	0.68408	-0.28418	-60.7749	235.7087	506.9774	-2.1663	0.50439	-0.48193
1.458	-14.05	50.095	83.492	0.031738	0.0014648	-0.047363	56.7886	33.4392	-8.0319	-0.050781	-0.076172	0.07666	30.213	-260.655	1358.201	-1.9155	0.74854	-0.25439	-75.005	216.6573	426.088	-2.108	0.48486	-0.46406
1.46	-22.372	49.47	43.38411	0.0271	0.008789	-0.043457	19.814	1.0157	-2.8738	-0.068848	-0.079102	0.084473	42.197	-197.813	1340.132	-2.1479	0.87354	-0.23145	-54.566	190.122	386.741	-2.0483	0.46533	-0.44482
1.462	-30.969	39.78	36.4901	0.026367	0.017578	-0.044434	53.5484	17.2628	13.2179	-0.083008	-0.075927	0.095459	21.2445	-175.8968	1387.5777	-2.2898	0.96558	-0.20239	-94.835	202.3232	355.6201	-1.9857	0.45186	-0.41787
1.464	-20.29	41.397	39.8801	0.020996	0.023438	-0.04248	27.6796	31.239	-4.7623	-0.095703	-0.075684	0.10693	19.496	-124.637	1388.3088	-2.3809	1.0547	-0.19043	-88.703	224.596	359.7521	-1.9348	0.43125	-0.39297
1.466	-6.57	42.24	37.83	0.020508	0.03125	-0.039551	23.127	15.6927	8.267	-0.11475	-0.066895	0.1167	27.458	-139.423	1430.0949	-2.396	1.145	-0.16553	-84.652	221.439	348.5763	-1.8797	0.40977	-0.37383
1.468	1.38200000000001	37.971	37.6878	0.015137	0.028809	-0.044922	47.0042	57.124	4.7001	-0.11865	-0.065918	0.12305	64.196	-72.093	1459.9683	-2.3706	1.1763	-0.16113	-76.586	230.548	305.3429	-1.8238	0.38984	-0.34922
1.47	-21.186	28.9951	57.6	0.01294	0.029785	-0.04248	15.031	34.303	-5.0542	-0.12549	-0.056152	0.13135	47.11	-91.178	1493.838	-2.2578	1.1836	-0.17969	-69.775	205.005	269.729	-1.7676	0.37793	-0.32568
1.472	-9.423	28.459	61.085	0.0019531	0.027344	-0.043457	20.452	20.1812	26.036	-0.11938	-0.054931	0.13599	25.736	-42.555	1493.6186	-2.1391	1.1548	-0.20484	-66.925	225.652	230.648	-1.7155	0.36299	-0.30576
1.474	3.347	33.669	48.339	-0.0073242	0.026855	-0.044922	27.996	40.431	15.2372	-0.10889	-0.049805	0.13965	-7.574	-66.909	1527.6241	-2.0137	1.0996	-0.22949	-68.657	228.336	228.236	-1.6558	0.35742	-0.28018
1.476	-2.155	48.603	49.134	-0.016113	0.025879	-0.043457	-2.044	13.98343	11.6779	-0.092773	-0.054688	0.14941	-9.755	-28.706	1521.778	-1.8574	0.99609	-0.26074	-73.742	238.668	209.3338	-1.5976	0.35468	-0.25557
1.478	5.201	48.015	44.252	-0.035645	0.024414	-0.04248	-1.029	29.2467	26.7809	-0.076172	-0.056152	0.13721	-25.986	-74.151	1599.244	-1.7808	0.93408	-0.28564	-46.754	212.353	186.4602	-1.54	0.35694	-0.23574
1.48	-3.56	52.274	36.7568	-0.053467	0.027343	-0.043701	-23.835	23.0746	21.7923	-0.051758	-0.062012	0.13867	-48.494	-40.864	1614.616	-1.6387	0.82227	-0.34766	-59.7954	156.79	154.3581	-1.4819	0.36182	-0.21436
1.482	15.591	45.366	16.48384	-0.065918	0.03125	-0.041992	-45.2305	2.739	24.7849	-0.023437	-0.075684	0.13574	-25.087	-97.8601	1660.69	-1.6592	0.833	-0.37183	-28.5417	147.2225	112.4156	-1.4198	0.37178	-0.19854
1.484	-3.376	26.811	20.8356	-0.08252	0.034668	-0.042969	-9.559	42.282	22.6882	0.0024414	-0.09082	0.12744	-37.364	-47.2216	1654.034	-1.8315	0.89111	-0.37061	0.0769999999999982	106.266	116.002	-1.3526	0.37989	-0.18057
1.486	20.378	9.0535	35.418	-0.094726	0.039795	-0.035401	-39.1246	39.304	14.7495	0.03418	-0.11572	0.11426	-16.0843	-94.049	1675.365	-2.1602	0.96094	-0.3418	32.0372	114.4352	121.964	-1.282	0.38926	-0.16143
1.488	23.958	4.5957	46.264	-0.10449	0.046875	-0.032227	-28.498	29.1853	36.107	0.049316	-0.12646	0.10645	-17.998	-45.9582	1640.16	-2.2808	0.99854	-0.3252	29.4101	57.7432	93.474	-1.218	0.39375	-0.14404
1.49	34.712	18.2535	23.3966	-0.10986	0.058594	-0.026855	-27.966	53.239	24.071	0.073242	-0.15234	0.086914	2.206	-102.744	1659.745	-2.4141	1.0508	-0.34668	43.898	31.4558	57.5557	-1.1479	0.40674	-0.125
1.492	14.682	29.489	28.2418	-0.11377	0.063477	-0.025879	-50.065603	6.056	6.6766	0.092774	-0.1709	0.072021	-24.701	-48.9149	1634.1165	-2.4522	1.0743	-0.39258	76.939	-6.6767	33.776	-1.0807	0.40762	-0.11523
1.494	22.27	29.205	45.673	-0.11523	0.070801	-0.024902	-15.793	19.1749	18.3782	0.1084	-0.18213	0.057617	-27.044	-55.053	1646.691	-2.5015	1.1313	-0.44092	33.1075	-26.0886	46.6136	-1.0105	0.41426	-0.10762
1.496	18.989	29.138	39.766	-0.11426	0.075684	-0.020752	-29.8402	26.9787	12.24694	0.11621	-0.19678	0.039551	-42.27	51.6032	1651.913	-2.5449	1.2402	-0.46094	49.5776	-2.6612	70.0428	-0.93476	0.4127	-0.1002
1.498	6.189	23.975	19.1169	-0.10596	0.07959	-0.016602	-18.98	-3.9427	42.468	0.11719	-0.20557	0.031738	-13.068	37.31653	1659.594	-2.5664	1.2891	-0.45313	61.09274	3.127	63.937	-0.85176	0.41211	-0.087988
1.5	8.827	15.1527	20.2355	-0.093262	0.07959	-0.021484	13.875	31.969	40.156	0.11816	-0.20947	0.017578	-21.696	99.812	1631.9188	-2.6152	1.3574	-0.47119	42.6483	31.9043	37.9	-0.76318	0.40625	-0.081055
1.502	-1.476	9.6727	41.56	-0.088867	0.078125	-0.024414	-33.9964	26.7736	12.32403	0.10889	-0.20972	0.0073243	-14.362	58.096	1618.1315	-2.6423	1.385	-0.50097	43.7858	-10.1995	26.47	-0.68701	0.39629	-0.066602
1.504	-1.356	19.7138	37.795	-0.068848	0.071777	-0.024414	3.622	21.706	32.234	0.098633	-0.20801	0.0043945	-26.628	106.762	1576.147	-2.6582	1.4121	-0.52344	18.63	-0.600099999999999	12.1411	-0.61104	0.3835	-0.054687
1.506	-15.412	11.93623	25.026	-0.057861	0.064209	-0.019532	24.0996	32.509	31.622	0.076172	-0.18848	0	6.322	89.6033	1584.297	-2.6655	1.4341	-0.54639	17.931	-23.7311	8.6987	-0.54268	0.36358	-0.044922
1.508	-21.893	11.16201	11.4063	-0.039551	0.053223	-0.019043	7.71	-12.38593	28.897	0.066895	-0.17969	0.0043945	-10.52	133.277	1561.782	-2.6714	1.4399	-0.5625	5.201	14.5889	-1.738	-0.48047	0.34004	-0.032227
1.51	-1.764	13.2741733	32.0779	-0.021484	0.044434	-0.020996	36.736	-13.6732	32.5435	0.037109	-0.14453	-0.0014648	17.912	88.0507	1541.9706	-2.6895	1.4629	-0.58203	9.432	23.807	-30.2307	-0.4209	0.31152	-0.019043
1.512	-5.926	25.1858	19.7271	-0.016113	0.034668	-0.023438	32.3644	-10.26182	0.2438	0.011475	-0.11377	-0.00097654	-5.03599999999999	112.291	1531.0769	-2.7117	1.4749	-0.59448	-22.768	18.814	-48.239	-0.37784	0.28369	-0.012793
1.514	-7.835	22.3514	12.9526	0.0029297	0.020996	-0.019531	32.115	-13.2114	10.041	-0.0063477	-0.079102	-0.0024414	25.5851	62.3295	1499.97	-2.7358	1.4946	-0.60498	-37.2223	50.4977	-36.031	-0.34258	0.24297	0.009375
1.516	-35.097	24.737	20.5738	0.016113	0.010742	-0.020263	67.72587	22.9529	32.954	-0.029297	-0.030762	-0.0063477	-4.846	103.154	1505.23919	-2.7769	1.5239	-0.59814	-61.4859	35.3608	3.3461	-0.31953	0.21406	0.022656
1.518	-2.094	29.5196	26.8136	0.026855	-0.00048828	-0.023438	25.09	9.664	6.7744	-0.040039	-0.0063477	-0.010742	27.2625	94.939	1492.7074	-2.791	1.5371	-0.59668	-39.3718	74.923	14.2547	-0.30205	0.18037	0.038672
1.52	-14.044	19.2814	27.409	0.038086	-0.012695	-0.030762	38.501	14.3864	17.4765	-0.052246	0.040527	-0.015137	7.801	137.4623	1488.356	-2.8203	1.5625	-0.58057	-30.5769	62.432	41.157	-0.30078	0.14746	0.049805
1.522	-33.102	1.3267	20.5849	0.04541	-0.012207	-0.032715	44.1273	36.0333	12.15374	-0.055664	0.071533	-0.018066	5.642	126.851	1485.062	-2.83	1.581	-0.56739	-45.9964	73.438	27.01135	-0.31426	0.11699	0.065722
1.524	-17.908	-3.7667	38.359	0.061035	-0.027832	-0.036133	3.531	6.6663	23.076	-0.056152	0.10059	-0.021973	-0.206999999999994	142.095536	1453.514	-2.8418	1.6035	-0.55371	-56.8414	53.13	19.7097	-0.33252	0.091016	0.076368
1.526	-1.6	8.65404	52.007	0.06958	-0.037842	-0.050538	12.634	9.4727	32.153	-0.051758	0.12988	-0.033203	-14.569	114.006	1408.8649	-2.834	1.6309	-0.53418	-54.1873	30.4035	28.96	-0.36768	0.067187	0.080664
1.528	6.82	13.3414	38.2989	0.076172	-0.043457	-0.056152	12.768	11.6448	-1.43175	-0.04541	0.15137	-0.038574	-3.559	152.6011	1390.878	-2.8257	1.6372	-0.52686	-35.295	17.4289	41.652	-0.3916	0.051367	0.10313
1.53	-25.87	-0.609999999999999	29.293	0.089355	-0.052734	-0.067871	-21.988	-4.14148	-8.091	-0.035156	0.16309	-0.049316	2.326	179.3942	1348.9307	-2.7813	1.6387	-0.51074	-48.632	-4.797	36.642	-0.3999	0.022949	0.12939
1.532	4.095	-7.055	40.422	0.091797	-0.055664	-0.074219	16.016	22.625	-4.3537	-0.029053	0.17114	-0.064209	1.78	249.975	1330.979	-2.7241	1.6216	-0.50244	-19.966	3.6055	29.4768	-0.41201	0.0014649	0.14209
1.534	10.273	-19.509	47.2837	0.10205	-0.062988	-0.088867	-18.082	14.6969	-5.7599	-0.020508	0.18018	-0.07666	-1.97300000000001	262.117	1272.20983	-2.6479	1.5806	-0.49121	-6.75	-14.911	37.326	-0.41875	-0.013867	0.14863
1.536	12.618	-15.889	53.5449	0.10254	-0.068604	-0.098633	-22.663	15.14037	18.24352	-0.0058594	0.17676	-0.099609	-11.412	259.829	1238.097	-2.5469	1.5107	-0.46289	-5.847	20.5378	42.385	-0.42266	-0.018164	0.15957
1.538	6.487	-27.403	77.107	0.099609	-0.069824	-0.11182	-1.12	35.27	2.7819	0	0.17236	-0.10938	-7.829	238.614	1201.157	-2.4976	1.4653	-0.45557	28.138	5.906239	60.669	-0.4209	-0.022559	0.1542
1.54	39.946	-23.043	96.339	0.091797	-0.068359	-0.12598	-52.3864	6.1956	4.7097	0.016602	0.15576	-0.12842	-7.805	219.674	1188.9102	-2.4077	1.3794	-0.42285	24.2207	16.8817	57.425	-0.40625	-0.020508	0.16504
1.542	29.628	-26.777	116.722	0.085449	-0.061035	-0.12744	-21.24	13.7139	21.7309	0.02832	0.14086	-0.14356	-25.4536	233.618	1167.32972	-2.354	1.313	-0.40039	43.7986	6.6083	32.58	-0.38731	-0.018946	0.167
1.544	2.377	-21.9665	123.669	0.064453	-0.050781	-0.13525	-38.4261	19.4035	0.866300000000001	0.036621	0.12549	-0.1582	-14.934	238.373	1178.681	-2.3081	1.2495	-0.37646	51.1698	-3.2186	22.055	-0.36465	-0.014844	0.16416
1.546	22.995	10.1028	160.2993	0.037842	-0.034668	-0.14331	-35.917	5.3234	1.6243	0.048828	0.10059	-0.1792	-28.564	257.848	1123.533	-2.2437	1.1938	-0.35303	51.4025	21.102	31.2151	-0.33535	-0.017188	0.15791
1.548	45.036	39.7127	216.5585	0.0092773	-0.017578	-0.14893	-8.944	36.008	1.8186	0.057617	0.086181	-0.19409	-17.015	242.682	1073.639	-2.1973	1.1738	-0.34814	35.425	2.748	43.1173	-0.30625	-0.018359	0.15039
1.55	46.432	71.7941	267.348	-0.05127	-0.0048828	-0.15771	-51.781	32.008	-0.663500000000001	0.065918	0.067871	-0.20752	-11.236	244.332	1017.5242	-2.0977	1.123	-0.32422	63.254442	27.6378	32.5273	-0.27734	-0.027832	0.14941
1.552	45.21	69.1782	317.156	-0.080566	0.0019531	-0.1748	-11.838	21.0458	52.5686	0.068848	0.050781	-0.22803	14.44	226.58	979.02	-2.0264	1.0703	-0.30639	56.4404	-0.7852	6.2465	-0.25479	-0.043359	0.15127
1.554	63.725	53.411	382.9058	-0.15381	0.021484	-0.19336	-7.935	14.452	61.8161	0.07373	0.043945	-0.23291	0.102999999999994	248.638	955.3536	-1.9609	1.0176	-0.29395	27.6855	5.8189	-6.293	-0.23945	-0.061816	0.16084
1.556	51.573	50.203	414.645	-0.21192	0.039795	-0.21143	-22.483	-28.18	65.984	0.072754	0.014648	-0.26172	16.733	219.7915	934.805	-1.8765	0.95166	-0.26904	46.834	1.0722	-1.41	-0.22812	-0.083691	0.1667
1.558	3.211	41.0961	467.516	-0.27783	0.062012	-0.2251	6.266	-27.55	74.36043	0.068115	0.0061035	-0.28687	38.976	245.656	885.133	-1.8359	0.92188	-0.26074	12.215	-8.6383	10.3169	-0.21973	-0.099901	0.18066
1.56	1.951	34.074	516.663	-0.36816	0.10156	-0.24219	-1.8332	-13.592	84.399	0.056641	-0.0014648	-0.30811	60.248	208.848	841.169	-1.748	0.86914	-0.24609	27.883	-2.162	-2.1592	-0.2124	-0.12402	0.19629
1.562	11.922	22.064	556.3848	-0.4082	0.11963	-0.23584	-10.071	-59.225	113.3433	0.037598	0.00097656	-0.32813	51.686	241.691	774.9923	-1.6901	0.82837	-0.23339	23.852	-6.814	-2.504	-0.21103	-0.1414	0.21231
1.564	2.7656	8.055	564.6177	-0.51709	0.15234	-0.24902	48.15856	-58.068	149.405	0.02002	0.003418	-0.33643	31.356	219.5895	714.7098	-1.6289	0.78516	-0.22461	-19.092	7.861	-16.3604	-0.20547	-0.16113	0.22998
1.566	-52.278	-11.8277	553.529	-0.61377	0.18652	-0.25903	14.613	-78.493	171.034	-0.023438	0.0092773	-0.34912	18.596	281.901	663.0167	-1.5439	0.72461	-0.20703	-9.841	-1.8792	-1.2726	-0.19571	-0.1752	0.24053
1.568	-44.9	-25.1631	582.00074	-0.7124	0.23584	-0.26025	31.473	-81.828	257.8246	-0.072998	0.020508	-0.35889	25.741	255.675	633.967	-1.479	0.68994	-0.19653	-26.847	46.253	27.0787	-0.18291	-0.18643	0.25039
1.57	-22.3963	-7.44	647.8546	-0.84961	0.29541	-0.24658	57.0622	-11.0731	371.907	-0.13135	0.027832	-0.3667	40.334	284.432	599.073	-1.4063	0.6543	-0.18945	-42.6555	50.809	41.902	-0.16211	-0.19727	0.25391
1.572	-22.6348	20.0512	677.2824	-0.91992	0.32813	-0.229	18.097	25.5459	498.6794	-0.22998	0.037598	-0.37256	70.55701	217.85119	551.21	-1.3066	0.59961	-0.1875	-35.16198	62.548	35.611	-0.13076	-0.20782	0.25761
1.574	-31.695	27.0249	689.212	-1.0835	0.40332	-0.21045	68.165	64.08685	620.191	-0.29102	0.042969	-0.38037	28.074	228.969	482.269	-1.2534	0.57861	-0.17822	-39.0542	44.536	8.0286	-0.092188	-0.21133	0.25439
1.576	-54.9637	9.1527	738.37	-1.2305	0.47387	-0.20556	47.747	61.7317	664.056	-0.42334	0.059082	-0.40967	28.442	191.9775	462.2478	-1.1563	0.53662	-0.1709	-65.865216	40.7179	9.35187	-0.039063	-0.21406	0.24932
1.578	-43.7927	-9.6641	780.427	-1.3784	0.56104	-0.19824	-11.977	2.94386	713.484	-0.54541	0.075927	-0.4126	34.132	247.581	413.7728	-1.0769	0.50098	-0.15991	-43.041	58.7909	-14.16534	0.0079102	-0.21592	0.23848
1.58	-51.1835	-26.5856	787.263	-1.5449	0.67871	-0.17432	24.001	-14.608	803.062	-0.67676	0.097168	-0.42578	44.222	212.2148	421.08	-1.0034	0.46582	-0.15039	-55.6546	42.3676	20.5595	0.067383	-0.21631	0.22656
1.582	-3.093	-10.142	762.5094	-1.605	0.73486	-0.15381	4.75	-24.288	861.741	-0.87646	0.12988	-0.43311	29.953	246.486	373.7573	-0.91309	0.41504	-0.14209	-38.288	51.45	25.32	0.12676	-0.22431	0.2086
1.584	-7.718	-7.40600000000001	797.0301	-1.6934	0.82617	-0.12988	35.311	-24.456	885.731	-0.99121	0.15234	-0.42871	47.8911	178.1958	354.5763	-0.87109	0.39258	-0.13281	-6.56	20.199	25.703056	0.179	-0.23203	0.19883
1.586	-13.309	-19.965	822.414	-1.7417	0.88525	-0.14428	41.7772	2.66399999999999	812.89	-1.2344	0.20898	-0.39258	5.206	205.896	321.1668	-0.78271	0.34229	-0.12842	-7.335	20.2148	32.1911	0.23174	-0.23281	0.18399
1.588	-48.1489	-54.644	806.8452	-1.7749	0.9458	-0.17236	-6.12531	-70.9852	770.831	-1.4449	0.2688	-0.34399	-11.486	153.69015	292.0385	-0.72363	0.30859	-0.11523	-12.243	11.5342	51.624	0.28545	-0.24297	0.16797
1.59	-32.546	-85.819	819.878	-1.7813	1.0176	-0.22363	-0.3597	-117.784	770.421	-1.6831	0.3501	-0.30615	-35.195	192.999	247.773	-0.6626	0.27295	-0.10791	1.789	17.58866	70.384	0.33057	-0.24658	0.1499
1.592	32.91	-104.0679	871.069	-1.7695	1.0488	-0.24707	-16.043	-97.007	773.883	-2.0542	0.48486	-0.26807	3.012	151.3636	256.861	-0.58447	0.229	-0.10156	18.396	21.7701	69.767	0.36973	-0.25381	0.1377
1.594	31.81	-115.8281	941.431	-1.7026	1.0894	-0.27539	-24.8819	-104.943	854.76	-2.2402	0.55566	-0.25586	8.125	188.158	212.807	-0.54639	0.20166	-0.097656	1.766	4.0989	48.143	0.40127	-0.25781	0.12881
1.596	-5.504	-116.147	974.539	-1.6387	1.085	-0.29053	6.12	-78.673	903.2234	-2.5581	0.71533	-0.25293	25.8426	125.6	208.416	-0.47021	0.14844	-0.085938	35.33203	2.8923	17.5313	0.42119	-0.25977	0.11591
1.598	-23.033	-107.568	968.464	-1.5708	1.0688	-0.31006	-78.2385	-111.805	911.488	-2.7165	0.84156	-0.27808	-15.959	150.7667	172.9882	-0.41578	0.10864	-0.081543	50.9247	-29.7408	45.981	0.43271	-0.25205	0.1084
1.6	-2.44900000000001	-109.52	1005.868	-1.478	0.979	-0.31396	-81.059	-184.8569	916.045	-2.7847	0.96826	-0.30078	-20.713	115.6065	163.5166	-0.36475	0.071289	-0.075684	30.1311	-8.3888	31.3437	0.43848	-0.23926	0.10059
1.602	-3.359	-123.6844	1054.868	-1.4395	0.91016	-0.31982	2.313	-171.17	941.078	-2.6987	1.1177	-0.33252	-18.441	173.459	127.4947	-0.29834	0.020508	-0.066895	57.3352	-22.2694	27.1016	0.44404	-0.22051	0.10361
1.604	2.488	-124.3213	1073.1814	-1.3633	0.74805	-0.32129	-13.63	-138.381	988.73	-2.6011	1.188	-0.35059	-3.92	135.066	117.9905	-0.26367	-0.0039063	-0.061035	60.7609	0.1254	32.7629	0.4375	-0.19844	0.10078
1.606	45.797	-120.109	1115.7	-1.3169	0.62695	-0.32055	48.624	-95.29	1062.0213	-2.353	1.2954	-0.41846	-2.973	150.975	87.1808	-0.20801	-0.041016	-0.066406	33.672	-15.1627	37.2559	0.42071	-0.16445	0.10039
1.608	55.3908	-99.457	1132.105	-1.291	0.50781	-0.32422	16.409	-70.728	1042.655	-2.1702	1.344	-0.47437	31.245	86.405	98.292	-0.18042	-0.064209	-0.076661	67.98613	-37.98739	60.351	0.39834	-0.11689	0.091993
1.61	26.247	-96.759	1151.054	-1.293	0.38379	-0.3335	-31.90908	-157.502	1007.409	-2.0137	1.3428	-0.52832	-7.978	88.61	80.4759	-0.14844	-0.085938	-0.07373	66.1819	-33.682	60.487	0.37695	-0.071289	0.077148
1.612	22.373	-95.972	1153.5762	-1.3125	0.33936	-0.3418	28.6104	-222.255	1048.026	-1.8511	1.2329	-0.56104	4.255	49.9725	69.619	-0.11035	-0.11914	-0.085449	21.258	-50	72.063	0.35733	-0.02373	0.067187
1.614	48.842	-87.81	1174.6939	-1.375	0.2793	-0.3418	20.062	-255.705	1122.749	-1.791	1.123	-0.56836	3.32899999999999	84.692	54.3756	-0.089844	-0.13184	-0.084473	22.59	-47.196	114.9393	0.34512	0.032715	0.060449
1.616	53.9375	-80.118	1192.98944	-1.4468	0.27051	-0.34765	18.535	-275.83	1220.61481	-1.6909	0.86572	-0.5459	24.603	52.165	53.1317	-0.060547	-0.15283	-0.091309	-1.054	-79.315	142.106	0.34238	0.07373	0.041309
1.618	8.86	-75.5767	1204.5294	-1.5308	0.29443	-0.35107	-4.759	-234.229	1253.75	-1.6413	0.66797	-0.52368	-1.396	57.974	41.891	-0.042237	-0.16967	-0.097168	-44.62	-106.289	192.385	0.34277	0.11299	0.01709
1.62	7.534	-73.717	1205.77323	-1.646	0.37061	-0.35986	-97.139	-220.157	1215.658	-1.627	0.49609	-0.50781	33.4351	24.98428	33.776	-0.022949	-0.17627	-0.09668	-25.0703	-128.617	236.318	0.34277	0.1499	-0.0043945
1.622	3.453	-59.068	1269.508	-1.7012	0.42188	-0.36816	-37.2101	-219.471	1261.0527	-1.6743	0.33398	-0.49854	31.214	18.52	19.5603	-0.012207	-0.19336	-0.10742	-45.567	-117.6599	339.1764	0.34414	0.18203	-0.030176
1.624	16.52	-43.6119	1324.231	-1.8101	0.5376	-0.37158	17.045	-150.897	1297.296	-1.7246	0.27979	-0.4873	18.2077	-14.3516	29.0231	-0.0053711	-0.19385	-0.10791	-79.325	-61.454	447.689	0.33887	0.20606	-0.054493
1.626	-13.191	-46.851	1318.3312	-1.8728	0.63012	-0.37427	31.787	-116.409	1348.4	-1.873	0.23193	-0.48242	5.163	-13.848	38.609	-0.00048828	-0.19482	-0.10986	-69.518	4.939	579.2897	0.32715	0.22598	-0.077149
1.628	4.862	-57.5366	1310.3641	-1.9316	0.7168	-0.36914	81.2193	-86.155	1404.5685	-2.0164	0.25757	-0.46753	-6.957	-7.62	39.012	-0.0019531	-0.18945	-0.1062	-43.79	75.802	706.404	0.30889	0.24141	-0.09336
1.63	17.212	-51.409	1326.051	-2.0034	0.82471	-0.3623	28.333	-41.601	1366.398	-2.1636	0.32959	-0.46826	1.441	2.546	31.6598	-0.010254	-0.18213	-0.099609	-65.0866	64.819	836.957	0.27246	0.25537	-0.10059
1.632	28.513	-42.534	1360.249	-2.0391	0.87305	-0.35742	56.749	-67.278	1389.982	-2.3438	0.49023	-0.49316	27.7831	15.7441	13.0412	-0.020508	-0.1709	-0.086914	-92.103	94.739	967.1011	0.22285	0.2626	-0.10429
1.634	33.767	-43.429	1358.146	-2.105	0.95947	-0.35889	112.14	-65.165	1422.312	-2.4219	0.58496	-0.51172	14.227	4.2263	23.939	-0.027832	-0.16602	-0.083496	-80.315	43.299	1087.201	0.17207	0.26445	-0.10703
1.636	35.165	-42.093	1342.3663	-2.1533	1.0054	-0.34864	71.735	-52.844	1429.395	-2.5352	0.77148	-0.53125	-0.356999999999999	25.648	5.8118	-0.04541	-0.14648	-0.073242	-119.63	46.438	1173.901	0.10762	0.26602	-0.10352
1.638	47.912	-57.8187	1362.8333	-2.2046	1.0464	-0.34912	82.764	-98.205	1474.1775	-2.5877	0.90014	-0.54174	-19.782	10.1443	0.87957	-0.057373	-0.13305	-0.062988	-98.24	11.94	1222.963	0.041797	0.27471	-0.093848
1.64	5.771	-63.1805	1374.431	-2.2729	1.0825	-0.36377	-11.363	-71.72197	1455.376	-2.6245	1.02	-0.55762	-18.1265	40.284	-10.895	-0.069336	-0.12109	-0.053223	-43.857	-35.895	1218.389	-0.020996	0.27881	-0.08252
1.642	-10.459	-49.5532	1372.854	-2.2983	1.0981	-0.36279	-55.032	-82.439	1446.653	-2.6426	1.1465	-0.57813	-12.614	13.6915	9.889	-0.080078	-0.10498	-0.043457	0.479999999999999	-99.455	1151.674	-0.079199	0.28652	-0.067578
1.644	22.321	-31.4875	1368.282	-2.3374	1.1255	-0.37451	40.3494	-102.889	1520.5821	-2.6465	1.1914	-0.58691	-6.433	41.913	1.175	-0.084473	-0.099609	-0.039063	1.641	-178.064	1101.257	-0.13701	0.29649	-0.051465
1.646	39.527	-15.0919	1357.401	-2.3533	1.137	-0.38354	35.088	-60.076	1541.282	-2.6328	1.2383	-0.60156	-10.308	20.2427	27.2607	-0.089355	-0.084473	-0.02832	48.3417	-229.068	1091.625	-0.18428	0.30625	-0.039746
1.648	5.807	-19.26651	1358	-2.3472	1.1411	-0.39209	65.401	-102.862	1583.941	-2.6299	1.2451	-0.61767	-37.33	55.854	-17.49086	-0.095459	-0.078369	-0.026123	70.849	-271.03	1108.8511	-0.22285	0.31972	-0.029687
1.65	-13.334	-12.6118	1339.3686	-2.3159	1.1294	-0.40381	66.176	-108.296	1565.489	-2.6187	1.2368	-0.62646	-31.213	18.9604	26.374	-0.095703	-0.07373	-0.022949	84.19674	-279.378	1109.243	-0.25537	0.33447	-0.018066
1.652	42.587	-7.053	1337.2321	-2.2886	1.1099	-0.40381	14.3	-77.245	1540.58	-2.5835	1.186	-0.62158	-29.315	39.614	22.829	-0.10254	-0.069824	-0.02002	94.6591	-316.614	1135.0011	-0.2752	0.35224	-0.014648
1.654	72.067	1.129	1349.5059	-2.2402	1.0742	-0.42188	68.3219	-91.465	1577.589	-2.562	1.1411	-0.61426	-14.637	-9.0979	32.36	-0.097168	-0.068359	-0.01416	42.838	-336.676	1135.706	-0.28584	0.36631	-0.011817
1.656	43.239	6.916	1359.4728	-2.2016	1.0356	-0.43799	90.1224	-31.627	1578.191	-2.4976	1.0298	-0.59326	18.565	40.479	9.2108	-0.098145	-0.066406	-0.010254	58.2795	-336.613	1172.313	-0.29053	0.37646	-0.014551
1.658	62.907	7.961	1354.14353	-2.1621	0.99219	-0.44531	46.686	-16.443	1559.374	-2.445	0.93774	-0.58081	9.392	1.0556	27.15	-0.095703	-0.065673	-0.0080565	55.73598	-286.0893	1237.731	-0.28994	0.38526	-0.019922
1.66	83.0595	9.4375	1340.067	-2.1133	0.92773	-0.45313	63.354	-45.568	1569.627	-2.396	0.8501	-0.56592	-21.421	37.257	-10.9168	-0.095215	-0.063477	0.0014648	69.778	-194.975	1275.842	-0.2832	0.38965	-0.033691
1.662	61.881	16.4461	1323.5822	-2.0933	0.89697	-0.45947	-16.062	1.468	1526.506	-2.3555	0.76172	-0.54492	-21.305	-6.49611	27.966	-0.095215	-0.05957	0.012207	70.445	-159.75	1309.8566	-0.27285	0.3875	-0.040137
1.664	39.703	14.4606	1323.8879	-2.0605	0.84961	-0.46289	-39.396	-19.90231	1515.587	-2.3433	0.7251	-0.5376	-7.334	44.584	3.689	-0.094727	-0.058594	0.014648	66.76	-152.868	1313.6869	-0.26699	0.3793	-0.052051
1.666	76.699	1.6202	1319.9043	-2.0293	0.81055	-0.46729	13.208	12.983	1530.8709	-2.3394	0.68799	-0.52881	7.745	6.529658	26.5374	-0.093262	-0.054199	0.03125	60.2611	-209.0875	1323.7952	-0.26816	0.36328	-0.054395
1.668	61.333	-4.6988	1324.957	-2.0137	0.79297	-0.46777	12.561	58.43	1524.305	-2.3518	0.6687	-0.51147	22.286	66.343	20.6306	-0.095215	-0.049072	0.047119	51.375	-260.928	1354.11	-0.28555	0.34346	-0.064257
1.67	32.779	-3.1047	1306.4906	-1.9824	0.76953	-0.46533	32.209	-15.886	1539.083	-2.3672	0.66211	-0.50195	7.277	20.7541	39.701	-0.094238	-0.043945	0.061035	52.179	-289.351	1397.308	-0.31885	0.31592	-0.074707
1.672	28.017	6.3655	1296.9165	-1.9604	0.75	-0.47266	17.976	21.542	1480.936	-2.3848	0.67285	-0.48633	-13.845	65.496	5.734	-0.090332	-0.046387	0.072754	-24.891	-291.293	1431.707	-0.37461	0.28692	-0.087696
1.674	64.478	26.79851	1298.252	-1.939	0.73096	-0.47998	-5.419	26.9269	1439.9368	-2.3867	0.68164	-0.48242	15.642	18.1975	31.7551	-0.087402	-0.043457	0.078613	-41.4431	-293.5007	1430.8573	-0.44287	0.25478	-0.09668
1.676	54.487	57.654	1284.8894	-1.9199	0.71973	-0.4707	97.2375	15.1508	1479.306	-2.3789	0.70264	-0.4707	27.972	63.938	8.413	-0.081055	-0.049805	0.087891	-92.112	-294.98	1451.2729	-0.53271	0.22198	-0.097461
1.678	58.787	74.832	1251.4925	-1.9082	0.7168	-0.4668	81.215	84.5677	1485.3132	-2.3603	0.70996	-0.46436	28.51	9.275	39.426	-0.071045	-0.050293	0.093506	-65.247	-272.511	1488.803	-0.65303	0.18643	-0.10117
1.68	62.818	81.115	1217.5408	-1.8823	0.72705	-0.46826	42.541	10.885	1481.278	-2.3315	0.71533	-0.4541	42.98	36.0448	35.281	-0.057617	-0.052734	0.09668	-38.127	-193.4284	1528.38	-0.80273	0.15576	-0.097168
1.682	55.194	71.053	1222.94	-1.8614	0.73096	-0.47583	79.3686	1.59161	1474.503	-2.2813	0.70703	-0.44238	11.037	-11.0485	41.866	-0.034668	-0.056641	0.10156	-61.079	-106.411	1572.933	-0.98469	0.13759	-0.096387
1.684	43.995	65.79	1242.82	-1.8418	0.73926	-0.48047	40.424	29.2995	1438.105	-2.2559	0.69922	-0.43555	-29.977	33.1	14.9202	-0.023438	-0.058594	0.10547	-87.699	-39.61	1603.317	-1.2	0.13203	-0.091211
1.686	24.35	56.965	1226.798	-1.8086	0.74414	-0.48438	55.8713	7.182	1450.3075	-2.1987	0.68018	-0.42725	9.008	-9.7502	30.127	0.0043945	-0.071777	0.09375	-122.17	-33.404	1618.954	-1.4453	0.14179	-0.086523
1.688	39.838	59.833	1180.2251	-1.7944	0.74561	-0.48779	92.7694	99.262	1413.2637	-2.1551	0.65357	-0.41333	12.14	10.106	12.8614	0.029785	-0.081543	0.097169	-59.027	-40.602	1627.22	-1.7139	0.16016	-0.086524
1.69	13.915	63.3602	1155.01495	-1.7651	0.73877	-0.47754	17.297	77.222	1343.3642	-2.1094	0.62207	-0.40625	-11.63	-30.769	25.111	0.050781	-0.090332	0.093262	-60.373	-66.625	1638.226	-1.9858	0.20459	-0.09082
1.692	9.135	57.3398	1131.917	-1.7427	0.73438	-0.47265	29.588	33.272	1307.4324	-2.0566	0.57227	-0.38574	-2.82	2.0444	12.53718	0.084961	-0.11084	0.083008	-26.1744	-65.678	1624.6242	-2.2161	0.25849	-0.080664
1.694	7.119	65.3158	1103.179	-1.7183	0.72217	-0.4624	6.044	71.658	1281.229	-2.0234	0.54883	-0.38477	4.559	-5.7389	31.3986	0.104	-0.11572	0.081543	-77.872	-82.5	1631.061	-2.3879	0.3127	-0.070215
1.696	14.271	75.786	1083.5132	-1.6855	0.70898	-0.45801	34.383	54.6222	1276.75666	-1.9604	0.51611	-0.37061	-22.247	38.8439	23.1183	0.1377	-0.13135	0.068359	-91.436	-70.234	1595.606	-2.5035	0.37832	-0.070996
1.698	33.569	76.611	1080.244	-1.6694	0.70068	-0.44482	100.814	104.802	1272.7849	-1.9109	0.50122	-0.36133	-16.176	11.4598	44.034	0.15992	-0.14404	0.066162	-96.275	-58.0834	1579.409	-2.5499	0.45401	-0.073925
1.7	21.413	57.669	1058.5324	-1.6284	0.69092	-0.43311	44.766	164.642	1231.596	-1.8574	0.49414	-0.34961	-22.177	34.0679	27.3105	0.18457	-0.15771	0.057129	-25.2062	-59.355	1605.922	-2.5308	0.54346	-0.081543
1.702	27.643	50.1174	1046.848	-1.5918	0.68847	-0.42725	31.796	122.308	1208.836	-1.7827	0.47803	-0.34131	-42.388562	10.9188	-4.29146	0.21729	-0.17432	0.045898	33.152	-66.94	1633.839	-2.4866	0.64717	-0.08877
1.704	31.381	64.939	1010.128	-1.5557	0.6875	-0.41748	39.838	184.981	1171.6346	-1.7422	0.47021	-0.33984	-1.845	40.329	5.5307	0.23193	-0.18018	0.037598	-24.972	-78.259	1624.236	-2.4393	0.75869	-0.10234
1.706	38.869	81.531	999.869	-1.4956	0.67822	-0.40967	13.632	177.667	1131.995	-1.6655	0.46338	-0.3335	-11.497	21.8717	2.132	0.25488	-0.19531	0.016602	-14.2207	-82.381	1601.575	-2.3972	0.86729	-0.10195
1.708	46.912	90.231	977.655	-1.4663	0.67236	-0.396	67.7261	151.46	1148.23493	-1.6089	0.45117	-0.32569	-44.698	21.4037509	-1.9017	0.26587	-0.2041	0.0065916	-26.227	-57.0097	1600.731	-2.3875	0.94629	-0.11865
1.71	31.777	104.648	939.3377	-1.4121	0.6582	-0.38086	36.675	184.837	1114.518	-1.5601	0.44775	-0.31787	-28.251	18.3921	-1.8805	0.28027	-0.2085	-0.013672	34.625	-17.4391	1619.231	-2.4082	0.99414	-0.15234
1.712	34.423	99.234	910.4564	-1.3672	0.64014	-0.36572	-37.3653	109.552	1086.332	-1.4937	0.44385	-0.29736	4.136	16.2179	-0.4868	0.28467	-0.21436	-0.019531	57.9373	21.3754	1604.3379	-2.4254	1.0059	-0.18252
1.714	19.432	90.9309	896.938	-1.332	0.62598	-0.3457	-4.425	103.658	1046.762	-1.4688	0.44629	-0.29492	-20.039	19.2951	-17.8149	0.2876	-0.21582	-0.031738	53.3934	27.7808	1538.441	-2.4237	0.97276	-0.19707
1.716	24.354	84.08152	894.8318	-1.2808	0.60107	-0.33203	-37.853	154.702	986.366	-1.4116	0.44971	-0.2876	15.725	25.193	36.1225	0.27686	-0.20361	-0.039063	24.7308	37.501	1471.831	-2.4237	0.92119	-0.21347
1.718	22.932	103.2685	862.1083	-1.2593	0.59033	-0.32178	-2.218	123.9142	978.154	-1.3633	0.45361	-0.2837	21.334	37.4812	25.9404	0.26733	-0.18994	-0.048096	-19.63512	62.0625	1438.961	-2.4366	0.85811	-0.22969
1.72	33.655	102.1665	836.6463	-1.2163	0.56494	-0.30469	31.612	202.133	930.49	-1.311	0.46338	-0.27881	4.243	35.554	24.4996	0.25244	-0.17334	-0.053711	17.878928	115.129	1440.143	-2.4668	0.79688	-0.25
1.722	27.943	104.7705	819.726	-1.1804	0.54566	-0.28881	-28.104	193.674	878.702	-1.2305	0.47656	-0.28125	11.501	28.8403	19.1351	0.2207	-0.14893	-0.055176	15.093	119.405	1427.62	-2.5263	0.74404	-0.26982
1.724	24.403	105.037	805.883	-1.146	0.52979	-0.28125	2.106	178.977	894.376	-1.187	0.48389	-0.27734	22.316	6.711	16.7954	0.20703	-0.13232	-0.060059	19.903	99.7361	1367.983	-2.6066	0.70469	-0.28819
1.726	22.617	107.826	776.3653	-1.1099	0.50732	-0.25781	-3.014	237.126	863.7	-1.1069	0.4917	-0.27539	-8.18	25.4268	12.8418	0.16846	-0.10107	-0.062012	-27.557591	58.729	1316.2887	-2.6969	0.68711	-0.31435
1.728	23.388	113.106	748.22593	-1.0947	0.49902	-0.25195	25.211	189.538	845.987	-1.0473	0.49683	-0.2644	25.579	16.9744	26.0105	0.13354	-0.075195	-0.069336	-75.574	76.983	1289.8069	-2.7854	0.6917	-0.33867
1.73	27.645	108.619	743.813	-1.0586	0.48047	-0.24512	45.9727	209.98	813.957	-0.99023	0.49316	-0.26123	26.656	52.72	19.5645	0.098633	-0.04834	-0.074219	-50.1345	142.985	1316.7494	-2.8584	0.71484	-0.36328
1.732	8.243	112.016	719.198	-1.0315	0.47144	-0.23902	-15.023	247.236	740.648	-0.91357	0.49072	-0.25342	12.792	38.801	30.606	0.056641	-0.01709	-0.077148	-27.022	199.114	1310.82	-2.914	0.76142	-0.38018
1.734	-1.111	110.504	702.308	-1.0044	0.46533	-0.22705	-7.501	202.6978	706.6758	-0.88086	0.48242	-0.24512	4.034	44.902	29.297	0.038086	0.003418	-0.083984	-14.307	223.829	1308.804	-2.955	0.81963	-0.39444
1.736	-11.851	99.1974	681.642	-0.97266	0.46094	-0.2207	-12.663	249.729	655.216	-0.81396	0.47021	-0.23291	11.845	9.1183	15.9699	0	0.030762	-0.09082	-63.474	187.812	1269.527	-2.9816	0.88526	-0.40615
1.738	5.494	93.0336	678.99	-0.94482	0.46045	-0.21094	-33.415178	214.439	638.3661	-0.76343	0.46167	-0.2229	7.302	46.016	22.42	-0.027832	0.051269	-0.088623	-52.767	186.311	1240.608	-2.995	0.94521	-0.41201
1.74	-14.251	88.9312	655.663	-0.90967	0.45947	-0.2002	27.1571	165.199	625.9491	-0.71631	0.44873	-0.20557	22.151	4.014	63.04697	-0.04541	0.074707	-0.094238	-49.0165	193.415	1227.08	-3	1.0059	-0.41211
1.742	-34.4239	99.5799	609.902	-0.8855	0.45533	-0.19092	20.285	184.9574	582.732	-0.66602	0.43555	-0.18848	7.876	-9.383	84.6042	-0.076172	0.099121	-0.098145	1.849	216.754	1208.646	-3.0062	1.0613	-0.41328
1.744	-15.901	104.5369	581.947	-0.85547	0.45117	-0.18164	-33.0171	133.9569	545.262	-0.64014	0.42822	-0.1792	-31.0145	-67.51	106.9658	-0.089111	0.11206	-0.10961	-2.205	214.885	1201.52	-3.0034	1.1154	-0.41162
1.746	-21.125	109.3437	558.2889	-0.81982	0.4375	-0.16943	7.402	156.5844	495.472	-0.59521	0.4165	-0.15869	-53.7825	-33.18	97.7434	-0.10059	0.12158	-0.12109	-50.0759	173.4303	1106.931	-2.9968	1.1579	-0.41006
1.748	-14.421	110.243	532.9851	-0.81055	0.43164	-0.16357	3.274	177.775	488.987	-0.56933	0.40869	-0.14551	-33.0124	-47.04	163.707	-0.10498	0.12988	-0.13916	-24.65	158.054	1055.487	-2.9877	1.1802	-0.4082
1.75	-22.156	111.412	503.0991	-0.77979	0.4292	-0.15869	22.9704	126.5214	484.9467	-0.54297	0.40039	-0.13379	-15.268	-15.389	194.2375	-0.10693	0.13525	-0.15137	-31.727	191.373	1017.347	-2.978	1.1958	-0.39648
1.752	-4.931	95.399	492.7317	-0.75488	0.42431	-0.15235	23.3216	169.724	441.1063	-0.50537	0.39893	-0.11279	3.729	-52.8156	264.499	-0.1001	0.1377	-0.1709	18.098	261.835	1027.781	-2.9615	1.1926	-0.38222
1.754	-12.809	94.371	487.4903	-0.73389	0.41797	-0.14209	-20.0127	155.371	399.9325	-0.48096	0.39893	-0.11084	11.772	-34.758	299.4715	-0.091553	0.13453	-0.1875	37.291	286	1004.2362	-2.9484	1.1808	-0.3707
1.756	-23.793	107.255	467.698	-0.70117	0.40918	-0.13916	5.8978	150.4392	385.847	-0.43945	0.38818	-0.10303	-18.889	-56.993	370.5447	-0.084961	0.13135	-0.20557	30.3891	277.457	923.0168	-2.9316	1.1633	-0.35977
1.758	-19.493	119.381	434.2694	-0.6792	0.40479	-0.13672	-38.66822	192.346	359.788	-0.39404	0.38037	-0.091309	-26.068	22.128	438.8058	-0.060547	0.12451	-0.22266	29.818	227.742	881.759	-2.9016	1.1386	-0.3416
1.76	-8.329	118.726	418.823	-0.6377	0.39111	-0.13184	-37.9151	133.696	338.069	-0.36865	0.37109	-0.089844	-22.103	48.7553	567.992	-0.054199	0.10889	-0.23389	48.154	225.9588	833.584	-2.8608	1.104	-0.31592
1.762	7.83	106.661	404.4541	-0.6084	0.38037	-0.12915	-2.368	131.0472	275.92033	-0.3208	0.34814	-0.070801	-9.79000000000001	115.65	632.707	-0.039063	0.095703	-0.25928	108.475	232.988	827.868	-2.8172	1.0683	-0.29902
1.764	-22.038	100.2133	369.52585	-0.5752	0.37207	-0.12988	-54.236	101.111	233.8849	-0.28882	0.32739	-0.064454	-34.72632	92.5407	740.011	-0.027344	0.076172	-0.27905	119.4555	261.31	778.67805	-2.766	1.0308	-0.2832
1.766	-8.491	93.7441	351.6247	-0.53223	0.35205	-0.13037	-43.644	47.293	222.56044	-0.25732	0.30908	-0.057129	-29.849	97.414	774.58093	-0.022949	0.057617	-0.30811	114.346	276.98	668.043	-2.7024	0.99452	-0.26055
1.768	0.989999999999998	96.631	342.1582	-0.50781	0.3457	-0.12988	-36.5093	102.5283	192.53664	-0.22168	0.2793	-0.043457	-34.8095	24.9477	857.884	-0.026855	0.038574	-0.34521	59.2267	234.714	607.657	-2.6314	0.95644	-0.24141
1.77	8.491	87.348	343.1066	-0.4751	0.33154	-0.12354	-49.5696	102.126	169.541	-0.20703	0.26904	-0.029785	-17.464	7.32	922.373	-0.040527	0.032715	-0.36084	68.5137	218.54	565.6384	-2.5547	0.92188	-0.22168
1.772	0.116	76.2419	311.63146	-0.44605	0.31763	-0.12646	12.421	113.971	149.587	-0.18018	0.25	-0.016113	19.845	-67.63	951.04	-0.068359	0.028809	-0.38721	73.676	211.492	579.7368	-2.4648	0.88555	-0.20224
1.774	-3.22	76.9864	298.0875	-0.41797	0.30127	-0.12598	-25.05	142.766	113.157	-0.16406	0.2395	-0.0048828	25.791	-93.148	892.618	-0.11084	0.032715	-0.40113	92.255	217.9205	551.203	-2.3754	0.84805	-0.18145
1.776	11.04	85.143	289.513	-0.38672	0.28516	-0.10986	-35.01118	85.973	120.2175	-0.14551	0.22803	0	45.7246	-163.555	856.819	-0.16699	0.040527	-0.42188	81.1085	227.7405	479.996	-2.2843	0.80938	-0.16621
1.778	3.129	101.602	265.5532	-0.37061	0.27734	-0.10693	-0.0489999999999995	89.5222	111.661	-0.12158	0.21777	0.0087891	29.5322	-180.963	807.3397	-0.26172	0.062012	-0.44922	31.453	209.1547	400.9037	-2.1968	0.76807	-0.14522
1.78	-1.792	94.134	259.5115	-0.34229	0.26416	-0.11182	-26.5944	104.496	100.0833	-0.10498	0.21484	0.015137	4.959	-207.064	834.4692	-0.31543	0.074219	-0.46484	26.747	206.5094	360.9427	-2.1113	0.71484	-0.13281
1.782	-8.887	92.641	244.9537	-0.32202	0.25049	-0.10816	10.801	53.3557	93.3793	-0.070313	0.19922	0.0092773	12.7841	-174.043	866.311	-0.43896	0.11133	-0.49316	29.862	212.958	364.2864	-2.0173	0.66475	-0.12627
1.784	-3.352	79.973	248.94	-0.29932	0.24268	-0.10693	-2.673	81.74143	56.2391	-0.038574	0.18774	0.0090329	-9.752	-153.793	923.927	-0.54638	0.14599	-0.50635	72.235	232.266	352.061	-1.9316	0.60928	-0.11806
1.786	-17.891	88.121	216.2476	-0.26855	0.22852	-0.10498	-43.1155	55.3753	37.0106	-0.0043945	0.17334	0.0097656	-39.111	-141.181	960.34	-0.67139	0.19287	-0.52148	38.395	233.374	317.765	-1.846	0.5542	-0.11026
1.788	-16.589	77.855	206.3702	-0.25879	0.21973	-0.10156	-5.558	28.9111	5.459	0.041016	0.14453	0.003418	-81.115	-186.522	1010.209	-0.86133	0.26367	-0.50781	10.412	245.041	252.98751	-1.7502	0.50645	-0.10156
1.79	-8.573	82.416	200.3371	-0.23145	0.21387	-0.09668	13.797	68.727	9.1009	0.061523	0.13379	0.0029297	-54.1094	-206.4601	1040.217	-0.96191	0.30762	-0.48975	-36.3795	231.982	228.047	-1.6577	0.46143	-0.10449
1.792	-14.518	74.041	206.558	-0.21216	0.20069	-0.097413	15.862	26.585	24.108	0.10254	0.098633	-0.00097656	-54.178	-195.919	1082.9514	-1.1113	0.37695	-0.375	-40.619	239.631	217.908	-1.5659	0.4169	-0.099998
1.794	-21.295	81.094	179.1519	-0.19238	0.19287	-0.10205	46.925	21.752	39.7331	0.12989	0.078614	0.001709	-23.756	-146.69	1134.622	-1.3653	0.46582	-0.3811	7.449	222.618	213.90084	-1.4742	0.3793	-0.095313
1.796	-14.72	79.879	154.3207	-0.17773	0.18359	-0.10889	21.6939	27.5286	23.155	0.1499	0.05127	0.00097656	-43.7885	-124.7	1167.895	-1.623	0.59082	-0.354	-8.892	188.52	188.3391	-1.391	0.33984	-0.097265
1.798	-8.698	65.761	157.175	-0.18066	0.1875	-0.11133	26.9087	-8.898	25.551	0.15674	0.026855	-0.012695	-37.648	-137.36	1176.4771	-1.9922	0.76953	-0.27734	-23.19	155.828	135.894	-1.3094	0.30371	-0.098632
1.8	-36.768	63.083	156.954	-0.1709	0.18408	-0.10693	29.881	46.965	-4.68294	0.14502	0.026855	-0.036621	-39.54206	-196.345	1185.8196	-2.1792	0.87646	-0.23779	-56.677	129.613	111.602	-1.2314	0.26709	-0.10107
1.802	-14.182	77.672	141.8868	-0.12671	0.16895	-0.078614	12.169	42.962	11.815	0.16748	0.01123	-0.00097656	-2.623	-233.71927	1236.804	-2.5273	1.1074	-0.16992	-34.114	139.2176	122.462	-1.1577	0.22803	-0.099807
1.804	-18.565	77.204	132.34035	-0.093262	0.14844	-0.067871	42.3627	33.132	31.5451	0.21143	-0.036865	0.025635	-20.6422	-270.236	1310.9177	-2.6977	1.2597	-0.14917	-13.495	127.438	153.727	-1.0914	0.19629	-0.10195
1.806	-8.11	73.165	140.513	-0.067383	0.13232	-0.064941	-17.233	68.901	15.06744	0.24365	-0.07959	0.046875	-53.919	-265.487	1380.785	-2.7573	1.3735	-0.14795	30.745	90.263	134.771	-1.0223	0.16269	-0.097656
1.808	-12.191	66.993	129.772	-0.058594	0.12744	-0.069336	-13.227	30.632	36.8171	0.24658	-0.1123	0.041992	-134.553	-268.68	1374.719	-2.6147	1.3794	-0.18311	27.56	51.62	111.698	-0.9542	0.13545	-0.094043
1.81	-26.739	84.977	112.688	-0.044434	0.11572	-0.070801	9.369	31.989	31.4008	0.23291	-0.12061	0.035156	-143.074	-237.82	1386.699	-2.4487	1.2739	-0.229	-4.395	18.215	61.134	-0.89014	0.10986	-0.089844
1.812	5.38	78.482	100.225	-0.032959	0.11425	-0.076416	-18.139	38.6459	32.154	0.21387	-0.12744	0.020996	-102.715	-226.484	1410.509	-1.8906	0.89453	-0.32373	29.24	24.381	71.506	-0.82187	0.087598	-0.084082
1.814	-0.108000000000004	80.323	99.189	-0.026367	0.11084	-0.075195	26.248	-4.072	31.5101	0.2019	-0.1377	0.028076	-20.887	-165.0018	1482.206	-1.5647	0.92017	-0.44116	20.444	22.27959	93.663	-0.75342	0.066894	-0.082227
1.816	0.192	60.213	91.5886	-0.0068359	0.104	-0.071777	-6.461	35.433	1.919	0.19727	-0.14355	0.037598	-16.948	-148.854	1502.1064	-1.5928	1.0879	-0.55566	57.59464	21.4386	62.2885	-0.68545	0.056348	-0.079102
1.818	-15.035	53.8644	63.1964	-0.0014648	0.10059	-0.071777	-32.0247	13.5736	-9.3759	0.19385	-0.15332	0.054688	-27.304	-94.123	1543.962	-1.8867	1.2061	-0.5	77.007	-11.142	36.7541	-0.61572	0.046973	-0.07959
1.82	16.992	47.0269	60.51727	0.014648	0.09375	-0.071289	15.424	-14.3689	34.9157	0.19189	-0.16064	0.066895	-11.677	-92.936	1519.442	-1.9766	1.1953	-0.45117	22.435	-18.057	-39.979	-0.54443	0.041504	-0.083008
1.822	7.22	54.532	82.408	0.024658	0.092041	-0.06958	-4.451	31.209	34.62	0.1958	-0.16357	0.066895	43.0766	-70.242	1542.094	-2.0488	1.0723	-0.48145	29.697	-11.985	-11.4603	-0.48154	0.036231	-0.088281
1.824	-3.477	54.582	76.612	0.03418	0.077637	-0.063965	-26.7439	2.055	39.453	0.19751	-0.167	0.064453	78.6872	-74.635	1515.679	-1.99	0.92846	-0.54444	17.326	19.8437	15.999	-0.41777	0.029785	-0.092285
1.826	14.301	52.234	69.4189	0.046875	0.074707	-0.0625	19.085	24.264	47.091	0.20215	-0.16602	0.05957	110.9257	-85.603	1513.064	-1.8398	0.77246	-0.57422	45.081	30.571	40.9486	-0.36152	0.023535	-0.096191
1.828	1.047	49.94	53.4956	0.05127	0.067383	-0.061523	-52.4542	36.403	24.6684	0.22607	-0.17236	0.053711	75.036	-103.199	1494.7427	-1.6597	0.51318	-0.55518	32.0769	12.9035	20.633	-0.31368	0.017774	-0.10508
1.83	6.071	50.421	56.829	0.064941	0.054688	-0.056152	-35.8416	-3.6338	31.2979	0.23389	-0.17188	0.053711	22.142	-97.987	1516.0093	-1.6479	0.3916	-0.52637	31.196	-4.672	-29.5429	-0.26611	0.013184	-0.11475
1.832	5.58	46.819	48.3173	0.071289	0.044434	-0.054931	-2.702	18.9896	39.452	0.24805	-0.17334	0.040527	-0.811	-99.335	1519.219	-1.709	0.41406	-0.5293	-10.5	-8.275	-31.189	-0.20966	0.00029294	-0.11973
1.834	24.071	47.189	63.343	0.076172	0.036133	-0.053223	-36.49	-2.7996	16.2753	0.2583	-0.17358	0.031739	25.3421	-85.595	1568.9878	-1.8237	0.51123	-0.49121	10.208	39.5102	-12.2158	-0.15332	-0.029101	-0.12148
1.836	9.776	32.694	60.099	0.099121	0.016602	-0.056641	25.798	-12.8017	27.0028	0.26563	-0.17383	0.022949	43.251	-86.888	1570.77042	-1.9312	0.6001	-0.45166	0.561	52.446	18.111	-0.10137	-0.057617	-0.1211
1.838	-4.04	28.979	47.3025	0.11182	0.0097656	-0.054688	-5.295	25.2251	8.479	0.28027	-0.17383	0.0073242	61.762	-72.459	1575.97	-2.0879	0.7168	-0.49219	10.154	55.043	-7.6137	-0.046289	-0.084668	-0.12129
1.84	-9.07	30.759	39.62305	0.125	-0.003418	-0.056152	-11.077	-8.5797	13.9436	0.28467	-0.1748	0.0063477	67.377	-60.039	1561.398	-2.1626	0.77197	-0.51709	2.57	29.5938	-0.5817	0.0063477	-0.11621	-0.12061
1.842	-3.518	35.619	43.622	0.13672	-0.017578	-0.064941	24.753	18.2286	11.7545	0.28711	-0.16846	-0.003418	49.2512	-39.82	1551.835	-2.3159	0.89697	-0.52393	-55.034	11.0402	-7.173	0.047265	-0.14561	-0.12539
1.844	12.299	27.988	60.627	0.15039	-0.027832	-0.063477	16.566	33.3316	2.9931	0.28467	-0.16919	-0.013672	34.5324	-2.262	1578.9648	-2.4353	1.0032	-0.52637	-24.985	27.11552	27.3349	0.077245	-0.16904	-0.13652
1.846	-23.321	26.675	37.354	0.15723	-0.043457	-0.075195	27.2959	-8.383	19.9512	0.28369	-0.16553	-0.01416	38.1314	-17.471	1582.83	-2.5386	1.1157	-0.53467	-48.4445	47.18	51.765	0.11162	-0.19717	-0.14433
1.848	0.424999999999997	32.547	19.394567	0.15698	-0.052002	-0.071778	19.726	15.5616	7.5357	0.27686	-0.15723	-0.024902	31.066	5.116	1550.132	-2.6206	1.2544	-0.56738	-30.122	60.8843	51.285	0.13555	-0.221	-0.15293
1.85	-2.908	25.3484	20.168	0.15869	-0.060059	-0.071777	-9.863	4.06001	21.4034	0.27246	-0.14844	-0.027344	-1.898	15.533	1531.3617	-2.6382	1.2935	-0.59131	-64.9795	32.0197	29.27	0.1582	-0.24805	-0.15186
1.852	-17.159	15.4031	37.733	0.1543	-0.065918	-0.071777	13.698	-10.6558	16.474	0.25684	-0.13184	-0.033203	-14.518	73.182	1500.7925	-2.5859	1.2734	-0.66016	-37.1356	14.2063	4.013	0.16944	-0.27022	-0.14473
1.854	-16.307	8.6892	41.5221	0.15283	-0.069336	-0.072754	8.321	33.5147	6.6609	0.24316	-0.11401	-0.040527	-54.936	101.87	1472.658	-2.4909	1.2522	-0.70922	-37.6516	3.9874	33.327	0.16328	-0.29199	-0.13506
1.856	-6.714	29.071	26.7303	0.14258	-0.066895	-0.071289	19.475	3.573	28.6609	0.22998	-0.097656	-0.041504	-41.033	113.804	1463.938	-2.4058	1.2798	-0.75146	-27.799	23.6174	35.209	0.13516	-0.2998	-0.121
1.858	10.716	31.798	30.1665	0.13843	-0.070068	-0.069824	30.058	9.74783	21.4108	0.20752	-0.074707	-0.049316	-67.5155	83.018	1464.6997	-2.394	1.3384	-0.76709	4.357	32.055	57.53	0.10029	-0.30595	-0.10136
1.86	-18.402	29.71	40.044	0.1333	-0.066406	-0.071289	-15.895	13.2497	-9.7463	0.19873	-0.06543	-0.052734	-51.71	64.881	1460.685	-2.4175	1.3599	-0.76416	-8.862	30.836	59.787	0.050293	-0.30615	-0.08252
1.862	-10.802	18.9428	39.336	0.12939	-0.059082	-0.070801	17.169	-0.937	3.4755	0.17383	-0.036133	-0.059082	-65.947	55.995	1460.681	-2.4424	1.373	-0.76074	15.4836	36.544	25.00857	-0.0022405	-0.29903	-0.067188
1.864	-16.054	23.3207	29.129	0.12646	-0.057129	-0.066895	16.774	43.485	-10.0632	0.15967	-0.019531	-0.060791	-19.078	107.136	1417.966	-2.4167	1.3489	-0.77515	-6.088	11.7008	44.44	-0.057408	-0.2792	-0.048736
1.866	13.377	10.3038	14.4483	0.12598	-0.050781	-0.0625	-4.452	17.2406	-1.675	0.14404	0.0014648	-0.061523	-9.038	128.318	1402.4813	-2.3555	1.2949	-0.79297	25.635	12.0896	44.6166	-0.11522	-0.24717	-0.027253
1.868	0.654000000000003	5.6664	6.7426	0.12402	-0.046386	-0.058593	21.976	1.32505	7.07	0.125	0.028809	-0.060547	-1.002	146.42	1373.922	-2.228	1.1938	-0.81006	24.78	0.495999999999999	62.5803	-0.16044	-0.20919	-0.010745
1.87	-7.781	4.60421	22.5177	0.12109	-0.042969	-0.056152	-19.01	47.707	-27.262	0.11475	0.044434	-0.062988	-23.047	105.549	1372.278	-2.1699	1.1406	-0.80762	35.736	-4.64356	27.8713	-0.19971	-0.1709	0.0019531
1.872	11.123	14.9388	22.6207	0.12109	-0.03125	-0.057617	-17.1153	19.3064	1.2132	0.098145	0.070313	-0.06543	3.721	94.469	1346.4011	-2.0757	1.0317	-0.79639	27.434	-6.9698	11.4075	-0.23409	-0.12801	0.016218
1.874	18.489	18.8689	17.9453	0.11621	-0.02832	-0.04541	13.487	43.351	33.468	0.087891	0.093749	-0.069092	19.226	71.8982	1333.285	-2.0535	0.96851	-0.78101	25.914	-36.374	0.1703	-0.25715	-0.089518	0.03321
1.876	12.974	18.7341	33.7931	0.11475	-0.021973	-0.048828	-40.326	55.374	26.0806	0.080566	0.11035	-0.071289	71.077	107.68	1318.371	-2.0483	0.92041	-0.76318	57.7867	-26.2527	18.3918	-0.27902	-0.052402	0.043373
1.878	4.377	15.4951	27.2673	0.1145	-0.018067	-0.04834	-18.951	15.3967	28.9564	0.069336	0.13525	-0.079102	37.4494	119.195	1296.783	-2.0742	0.87598	-0.73828	34.0486	-15.804773	14.0774	-0.29395	-0.027128	0.048536
1.88	3.817	18.2182	25.42	0.11377	-0.01416	-0.04834	0.0440000000000005	37.665	6.47743	0.064453	0.14502	-0.077148	16.327	134.8607	1220.3854	-2.082	0.86621	-0.72754	65.077	17.537	-2.0325	-0.30322	-0.0073242	0.057617
1.882	0.862000000000002	17.1802	22.1225	0.11133	-0.0053711	-0.04541	-41.4979	27.59567	4.1923	0.058105	0.16357	-0.074219	-5.826	115.707	1177.9658	-2.0444	0.88623	-0.72412	33.6087	28.3189	5.885	-0.2998	0.011605	0.061885
1.884	7.658	20.7212	16.5007	0.11133	-0.0024414	-0.041504	-5.011	13.9102	19.8623	0.047851	0.17603	-0.075928	11.361	143.529	1133.1209	-2.0009	0.90039	-0.71752	28.04	38.7568	-8.4955	-0.28774	0.017483	0.064225
1.886	22.064	19.4888	11.3353	0.11182	0.0039063	-0.044434	-8.177	46.478	18.4305	0.044434	0.18799	-0.075195	29.706	148.963	1106.9463	-1.9487	0.89893	-0.7041	-1.059	20.7915	1.806	-0.27524	0.012053	0.078247
1.888	7.609	14.4798	19.3054	0.1084	0.0085449	-0.040284	-4.561	11.28	10.3187	0.039551	0.2002	-0.072754	71.103	188.031	1086.357	-1.8926	0.89844	-0.68555	14.99	35.8875	-0.657999999999998	-0.25853	0.0036482	0.085823
1.89	4.52699999999999	13.8928	14.37971	0.10889	0.01709	-0.042969	15.916	18.2609	12.79034	0.032227	0.20557	-0.071289	50.7928	210.781	1040.36	-1.8706	0.90088	-0.67236	17.952	31.8629	28.2261	-0.24512	-0.01123	0.095215
1.892	-1.027	24.3351	14.6815	0.10791	0.019043	-0.041504	-26.0382	25.2213	30.6579	0.023926	0.21924	-0.070313	20.751	230.005	1015.1265	-1.8359	0.89648	-0.63477	-16.4037	19.7925	-0.762	-0.23027	-0.026866	0.10189
1.894	11.152	33.616	29.9656	0.10449	0.024414	-0.039063	8.035	1.974	37.203	0.02124	0.2229	-0.070069	11.254	214.847	971.08068	-1.8181	0.89428	-0.61499	-37.63238	34.3022	7.92922	-0.20913	-0.046349	0.10519
1.896	-17.763	33.2839	23.019	0.10156	0.032715	-0.039551	23.474	47.282	41.494	0.018066	0.22998	-0.069336	12.3	223.054	931.578	-1.7891	0.89063	-0.59375	-54.363	35.802	15.25992	-0.18795	-0.063482	0.11159
1.898	0.539000000000001	18.7687	27.154	0.10278	0.039063	-0.033203	-0.186	49.435	32.635	0.011719	0.2373	-0.060059	29.901	229.835	897.8307	-1.7402	0.87109	-0.57422	-0.415999999999997	55.4113	17.2235	-0.1569	-0.078468	0.11373
1.9	-5.29	15.3274	19.6902	0.10303	0.050293	-0.027832	24.0942	17.68	32.297	0.010742	0.23633	-0.064453	31.9854	231.5256	905.454	-1.7129	0.85547	-0.56445	-28.319	47.5249	19.18721	-0.12598	-0.087891	0.11377
1.902	-8.267	24.0752	2.14272	0.094727	0.060547	-0.027832	9.104	45.729	21.45629	0.0073242	0.24609	-0.058105	-37.622	231.5375	826.149	-1.6421	0.81494	-0.52881	-41.601	29.8667	-0.2934	-0.084562	-0.10332	0.1142
1.904	-2.569	23.5799	16.0935	0.091797	0.064941	-0.024902	1.301	-1.3092	33.932	0.0046387	0.24536	-0.044922	-84.812	221.363	796.108	-1.5955	0.78394	-0.50855	-36.588	45.975	16.4763	-0.048854	-0.1121	0.11265
1.906	-15.619	18.25176	24.4091	0.092773	0.080078	-0.030273	36.932	14.6101	20.4935	0	0.24805	-0.04541	-80.779	207.9692	703.769	-1.5527	0.75488	-0.4873	-35.5974	37.7553	38.019	-0.010918	-0.12442	0.1091
1.908	-23.902	22.0864	37.4878	0.090088	0.09082	-0.0354	13.159	25.724	18.4858	-0.0039063	0.25635	-0.040039	-80.509	208.90998	668.997	-1.4966	0.72998	-0.45654	-9.668	22.9513	59.062	0.021842	-0.13632	0.10922
1.91	-29.365	21.85896	95.9454	0.086914	0.1001	-0.040527	16.418	-6.278	26.71	-0.0073242	0.25977	-0.037109	-85.254	211.857	644.013	-1.4648	0.7207	-0.43262	-36.46664	6.5346	61.803	0.058594	-0.15186	0.10693
1.912	-2.192	-12.252	155.608	0.079102	0.11133	-0.043457	22.07	14.4251	5.7059	-0.0097656	0.26758	-0.031738	-74.643	229.3566	641.164	-1.4155	0.71533	-0.39697	-3.822	8.9218	66.075	0.090988	-0.16021	0.1016
1.914	-0.463000000000001	-10.433	212.3536	0.074219	0.11816	-0.048828	-9.999	-0.822500000000002	11.39896	-0.011963	0.27344	-0.033203	-70.986	259.066	578.9849	-1.3647	0.71338	-0.37622	-36.271	12.5662	58.948	0.1259	-0.17687	0.094727
1.916	-26.541	7.362	230.8667	0.061523	0.13281	-0.064453	22.541	-17.5989	32.179	-0.018066	0.27881	-0.03418	-68.674	247.183	574.606	-1.314	0.71338	-0.35107	8.24	35.057	43.932	0.15188	-0.1864	0.090745
1.918	-60.386	-10.532	261.161	0.04541	0.14477	-0.080078	-0.471	27.71	26.0307	-0.02002	0.28613	-0.029785	-55.371	250.02	517.135	-1.2393	0.70703	-0.31738	9.4644	29.1282	40.832	0.17303	-0.19297	0.077106
1.92	-59.343	-41.786	299.96	0.023926	0.15039	-0.10059	-6.31	-2.6744	55.8727	-0.02002	0.29395	-0.032715	-82.592	231.147	498.1032	-1.2002	0.70703	-0.30762	-1.351	4.299	15.4651	0.19189	-0.19092	0.065918
1.922	-51.054	-74.97	351.8703	-0.013672	0.16064	-0.13721	19.445	-26.4709	84.767	-0.023438	0.30225	-0.037598	-71.8488	248.06	424.946	-1.1133	0.69727	-0.27832	33.3282	-17.7895	8.5506	0.22311	-0.19223	0.063439
1.924	-32.2757	-95.79	403.8348	-0.038574	0.16895	-0.15527	-37.4602	-33.867	102.61	-0.025635	0.3042	-0.049561	-62.294	221.744	424.863	-1.0332	0.67773	-0.24512	33.807	-37.9867	4.2966	0.25662	-0.20007	0.056846
1.926	-32.019	-83.9373	446.528	-0.098633	0.1875	-0.19336	-19.8183	-86.4647	157.771	-0.030762	0.30322	-0.071289	-40.0844	226.014	385.16	-0.99219	0.66602	-0.23242	44.6222	-3.1118	17.5517	0.28295	-0.2047	0.051901
1.928	-39.3851	-30.023	469.295	-0.15699	0.20117	-0.21827	-24.2627	-45.874	222.081	-0.053711	0.29834	-0.10205	-62.525	183.242	381.319	-0.91992	0.63086	-0.20117	38.9262	0.2752	22.48369	0.30051	-0.20654	0.035262
1.93	-45.8578	23.0963	494.9012	-0.23193	0.22217	-0.24072	-52.855	-71.851	295.118	-0.068848	0.29883	-0.12598	-40.3295	180.946	315.495	-0.88184	0.58496	-0.17163	72.3831	12.8739	23.0954	0.3125	-0.20557	0.022461
1.932	-4.037	54.257	495.06	-0.33936	0.25293	-0.26074	-52.259	-139.9653	418.011	-0.12842	0.30615	-0.17041	-26.647	146.5888	291.1927	-0.83398	0.57031	-0.15967	22.918	11.3873	15.4139	0.32242	-0.2069	0.0094949
1.934	-12.38	51.948	546.1675	-0.40088	0.26465	-0.26953	-120.266	-123.14	528.127	-0.20142	0.31616	-0.20947	-12.166	148.198	245.5802	-0.7627	0.56055	-0.1377	59.73341	14.4627	23.0233	0.32112	-0.20689	-0.00094392
1.936	-11.916	52.9708	624.105	-0.51855	0.29541	-0.26514	-148.607	-161.689	611.677	-0.2915	0.33008	-0.24072	-8.894	120.8	276.219	-0.72412	0.54639	-0.12158	51.2525	36.566	39.0418	0.30509	-0.19899	-0.012232
1.938	-14.29	53.475	662.633	-0.62304	0.32593	-0.26538	-123.4016	-149.865	644.6385	-0.44043	0.35059	-0.26904	40.016	139.335	226.533	-0.65332	0.51855	-0.10059	-3.783	5.8138	38.91	0.2841	-0.19587	-0.027845
1.94	-20.247	60.382	675.861	-0.73096	0.35693	-0.26025	-173.861	-117.111	665.891	-0.5249	0.36084	-0.28271	26.3418	115.2586	203.374	-0.60449	0.49414	-0.09082	6.552	-18.921	42.716	0.24854	-0.18018	-0.036133
1.942	-29.642	65.005	688.665	-0.896	0.41357	-0.26074	-125.077	-135.687	699.561	-0.71338	0.38623	-0.30713	54.7196	116.917	167.6176	-0.55469	0.46875	-0.07959	-10.806	-58.7303	43.54	0.2016	-0.16872	-0.039768
1.944	7.449	44.5545	721.518	-0.98291	0.45068	-0.25732	-37.823	-98.025	772.43	-0.87402	0.40771	-0.3186	0.0479999999999983	75.90074	149.153	-0.48145	0.43604	-0.060547	-13.305	-42.589	88.971	0.14831	-0.15019	-0.043961
1.946	23.838	22.475	732.303	-1.1426	0.52539	-0.25488	-18.498	-69.5212	805.5005	-1.043	0.43652	-0.33301	-3.52200000000001	95.681	119.60719	-0.45068	0.4165	-0.057129	-10.011	-17.29	158.7817	0.089737	-0.12796	-0.048257
1.948	-5.504	-3.888	726.009	-1.2531	0.58032	-0.23096	12.544	-57.598	837.87204	-1.2861	0.47461	-0.33594	15.788	90.3263	114.151	-0.3999	0.38721	-0.048828	19.553	12.763	218.5396	0.029983	-0.10503	-0.052259
1.95	-12.414	-52.436	739.559	-1.3589	0.63525	-0.21777	-26.519	-3.096	849.677	-1.4082	0.5	-0.32617	26.369	123.315	67.7546	-0.36401	0.36011	-0.036377	2.046	21.948	251.6341	-0.025391	-0.080078	-0.056641
1.952	11.5	-99.47924	786.794	-1.5376	0.71533	-0.22998	-29.803	-17.075	849.333	-1.6675	0.56299	-0.30322	-4.579	88.5806	63.52	-0.32617	0.33594	-0.026855	-10.618	30.0297	307.961	-0.074079	-0.052661	-0.058002
1.954	25.145	-113.35	842.817	-1.6089	0.76611	-0.23877	11.0745	-39.034	869.5078	-1.8699	0.63159	-0.2854	16.576	59.472	43.436	-0.28857	0.30322	-0.022461	-13.978	50.5301	406.6715	-0.12194	-0.022208	-0.057222
1.956	21.458	-114.77707	869.64	-1.7476	0.86377	-0.25244	26.0294	-29.456	893.8354	-2.0625	0.7207	-0.26318	-32.585	14.711	3.904	-0.26758	0.28906	-0.015625	-62.0286	52.658	499.258	-0.15592	0.013739	-0.06035
1.958	36.903	-129.142	895.523	-1.822	0.93628	-0.26245	45.212	-84.32	962.429	-2.2832	0.86719	-0.23535	-26.516	25.3678	-15.3522	-0.24219	0.25928	-0.013672	-37.4409	79.387	604.2654	-0.18837	0.048914	-0.064842
1.96	13.049	-132.164	904.492	-1.8608	1.0044	-0.26709	4.453	-78.53	985.837	-2.3667	0.94189	-0.23096	-16.767	13.66651	-6.83873	-0.22754	0.24023	-0.010986	-53.4207	75.775	706.496	-0.20703	0.077148	-0.071289
1.962	-38.2214	-120.718	926.7794	-1.8574	1.0742	-0.26904	-10.608	-76.99	975.638	-2.4858	1.1021	-0.2334	2.01300000000001	40.81333	9.4556	-0.2124	0.21924	-0.0043945	-56.308	66.869	829.5367	-0.22129	0.11007	-0.076468
1.964	-17.7612	-109.28	980.07532	-1.8315	1.0903	-0.26611	62.3577	-148.953	995.406	-2.4897	1.2368	-0.25244	-40.166	26.615	9.958598	-0.1958	0.20703	-0.0039063	-58.928	29.0065	964.042	-0.22246	0.1376	-0.095415
1.966	6.518	-112.328368	1037.761	-1.7578	1.0938	-0.26807	86.2896	-141.666	1031.906	-2.4585	1.2915	-0.26807	-36.4582	31.52314	3.9623	-0.18555	0.20313	-0.0073242	-37.127	-14.2772	1063.433	-0.21269	0.15596	-0.11182
1.968	-9.844	-112.982	1055.076	-1.6785	1.0599	-0.25537	110.419	-197.1163	1084.4192	-2.3394	1.356	-0.31396	-57.5123	24.614	-1.5386	-0.16699	0.19385	-0.003418	-32.718	-27.302	1151.851	-0.19531	0.16572	-0.13545
1.97	-26.656	-124.951	1046.489	-1.6011	1.0005	-0.24268	119.929	-264.434	1138.715	-2.2241	1.3531	-0.34155	-40.1404	19.5886	35.72	-0.15454	0.18921	-0.0012207	8.41	-80.733	1229.363	-0.1748	0.17188	-0.15625
1.972	-15.956	-129.293	1043.084	-1.5205	0.89258	-0.21924	56.6491	-249.091	1143.749	-2.1089	1.311	-0.36328	-35.007	16.95438	36.535	-0.14355	0.18262	0.00097656	70.58793	-141.299	1287.535	-0.15527	0.16816	-0.17461
1.974	-17.068	-97.247	1062.0934	-1.4956	0.8208	-0.21289	38.378	-303.981	1217.906	-1.9688	1.1592	-0.35205	-24.267	33.867	24.4712	-0.12158	0.17627	0.010254	44.014	-225.084	1285.951	-0.13838	0.15489	-0.18828
1.976	-25.102	-59.15	1100.3	-1.4741	0.70361	-0.19434	41.149	-303.015	1276.07	-1.9155	1.0483	-0.33936	-37.421	30.2754	-4.3645	-0.11523	0.17285	0.01123	55.1447	-286.553	1260.907	-0.12353	0.13301	-0.20469
1.978	-3.663	-52.55	1126.908	-1.4812	0.62671	-0.18286	17.355	-278.677	1303.186	-1.8457	0.82715	-0.31445	-22.14	24.1055	19.9281	-0.094727	0.16162	0.017578	17.8972	-340.017	1257.147	-0.11778	0.10537	-0.21602
1.98	-25.341	-75.534	1159.8944	-1.5034	0.55908	-0.16992	31.61199	-311.28	1349.342	-1.8289	0.6814	-0.3147	-28.209	18.704	29.03933	-0.081787	0.15698	0.026856	7.169	-363.324	1250.237	-0.1084	0.07373	-0.2207
1.982	-49.177	-89.0466	1189.1891	-1.5625	0.50977	-0.16016	8.0357	-230.716	1337.26534	-1.8296	0.56592	-0.31201	-14.947	34.9704	28.415	-0.069336	0.14746	0.035645	-17.107	-323.134	1249.746	-0.096486	0.034081	-0.22392
1.984	-36.728	-84.5846	1218.682	-1.6016	0.49414	-0.15723	-22.47314	-193.6534	1345.39	-1.8765	0.46924	-0.31299	8.111	42.9583	18.419	-0.062988	0.13477	0.042969	-8.079	-299.314	1263.248	-0.08496	-0.0012704	-0.22246
1.986	-29.662	-74.8	1253.656	-1.6851	0.49268	-0.15918	-6.356	-171.771	1383.369	-1.9116	0.43799	-0.31299	28.28531	53.491	32.283	-0.056641	0.12207	0.044922	-10.80393	-253.663	1255.5277	-0.074414	-0.033301	-0.22989
1.988	-22.464	-75.269	1281.603	-1.7497	0.52026	-0.16699	-9.68	-79.876	1380.393	-2.0195	0.43164	-0.31738	28.762	41.139	25.695	-0.058594	0.10693	0.058594	-28.9	-264.724	1282.3571	-0.065429	-0.067383	-0.23994
1.99	-30.952	-86.815	1303.418	-1.8159	0.56201	-0.18115	1.078	-110.278	1406.7311	-2.116	0.469	-0.33814	42.083	27.374	39.455	-0.056396	0.09375	0.068115	-31.139	-216.96	1303.165	-0.060059	-0.095215	-0.25439
1.992	-10.472	-98.4741	1310.362	-1.8999	0.63916	-0.21436	-24.176	-121.022	1417.732	-2.2188	0.54492	-0.36182	38.318	18.6837	15.722	-0.061523	0.082031	0.076172	-72.877	-186.956	1313.133	-0.071289	-0.11904	-0.27813
1.994	-23.026	-89.54	1319.1153	-1.9395	0.68359	-0.22754	-52.3817	-99.754	1416.3072	-2.3413	0.68408	-0.40137	21.28	15.8083	15.109	-0.067383	0.064453	0.09082	-19.874	-160.036	1352.44	-0.097558	-0.13457	-0.29473
1.996	1.92	-60.307	1326.0508	-2.019	0.77197	-0.27002	-46.335	-151.5896	1462.3074	-2.4004	0.7627	-0.42285	41.395	14.5232	19.37728	-0.064941	0.057617	0.095215	-25.395	-115.17	1381.9926	-0.16631	-0.14082	-0.30058
1.998	2.536	-43.973	1331.82799	-2.075	0.83521	-0.29248	-54.992	-106.698	1491.7457	-2.4956	0.90967	-0.45264	37.7574	17.8332	48.1576	-0.069336	0.043457	0.10303	-8.745	-128.241	1402.91	-0.28213	-0.13555	-0.30605
2	-22.144	-38.46	1323.2911	-2.1309	0.90039	-0.31055	-83.752	-114.408	1511.5802	-2.5445	1.0171	-0.46387	30.149	14.9334	45.378	-0.069824	0.030762	0.11353	6.9208	-141.063	1406.645	-0.43457	-0.12402	-0.2915
2.002	-28.6579	-37.978	1332.696	-2.1987	0.97217	-0.32666	-67.9895	-182.198	1541.465	-2.5815	1.106	-0.48438	29.448	8.36467	53.314	-0.067383	0.021484	0.11963	-2.795	-224.571	1431.864	-0.61523	-0.10371	-0.25859
2.004	-14.5726	-49.8749	1352.179	-2.2285	1.0049	-0.33594	-65.335	-141.97161	1537.563	-2.6265	1.2095	-0.50146	20.565	3.75	15.491	-0.063965	0.0073242	0.12793	-31.113	-240.781	1454.997	-0.80966	-0.080762	-0.20771
2.006	-23.865	-32.2062	1366.624	-2.2964	1.0659	-0.37061	-60.508	-174.166	1563.2	-2.6382	1.2388	-0.49756	-5.188	-12.0977	13.4261	-0.054199	-0.0019531	0.13232	-71.0255	-269.117	1504.169	-1.0257	-0.053418	-0.1417
2.008	-35.032	-6.403	1373.9288	-2.3428	1.1094	-0.39746	-35.316	-155.973	1600.022	-2.6602	1.2734	-0.51563	-4.307	-11.784	1.736	-0.037109	-0.020996	0.13867	-46.963	-224.9484	1560.356	-1.2489	-0.02334	-0.086719
2.01	-45.138	27.253	1366.074	-2.3809	1.1563	-0.42188	-14.269	-101.0339	1604.42	-2.6745	1.2815	-0.53247	-1.596	-14.13389	11.7544	-0.011963	-0.031983	0.14599	-42.806	-240.993	1572.468	-1.4805	0.019043	-0.051758
2.012	-49.086	34.715	1343.562	-2.4043	1.207	-0.44531	-3.922	-164.038	1589.04	-2.6855	1.2813	-0.5332	-0.665999999999997	17.4881	0.7048	0.013672	-0.055176	0.14844	-15.316	-248.636	1550.382	-1.7127	0.076953	-0.050097
2.014	-52.111	26.3681	1340.1511	-2.418	1.2285	-0.44922	3.281	-119.382	1564.745	-2.6733	1.2603	-0.5332	-21.119	13.4094	16.1542	0.061035	-0.083008	0.15186	9.546	-235.553	1552.4406	-1.9444	0.17314	-0.085254
2.016	-31.73	18.204	1344.4788	-2.4219	1.2617	-0.46484	-14.215	-87.4028	1531.5706	-2.6641	1.2363	-0.5293	-10.469	47.0054	4.81671	0.083496	-0.098633	0.15479	20.63	-197.909	1596.263	-2.1444	0.2997	-0.12509
2.018	-16.9893	-5.932	1379.09	-2.4104	1.2707	-0.47632	3.601	-94.8145	1543.715	-2.6406	1.1934	-0.51855	-60.7376	27.3794	20.0451	0.14209	-0.13037	0.15283	36.979	-97.788	1634.923	-2.2726	0.43066	-0.13145
2.02	-21.249	-20.489	1385.632	-2.3965	1.2715	-0.47363	7.384	10.419	1534.8604	-2.6219	1.1614	-0.50757	-51.526	46.6378	-9.7961	0.18042	-0.16309	0.15088	87.793	-75.037	1642.036	-2.3535	0.54639	-0.12695
2.022	-62.964	-15.628	1370.05	-2.3652	1.2539	-0.4707	-1.3521	-3.85	1513.018	-2.6016	1.1348	-0.49316	-41.6084	32.5396	14.13408	0.22168	-0.19336	0.14697	121.516	-33.813	1579.509	-2.4105	0.66172	-0.14619
2.024	-67.901	0.997999999999999	1374.055	-2.3516	1.2402	-0.47363	-5.34345	1.3358	1514.052	-2.5918	1.1152	-0.4707	-29.071	42.1828	11.3802	0.27588	-0.23242	0.13477	133.048	-52.236	1542.2753	-2.4733	0.78369	-0.20186
2.026	-57.406	-1.22	1359.4614	-2.3301	1.2227	-0.47266	-6.9396	74.661	1456.907	-2.5835	1.1118	-0.4624	-43.3275	-2.589	22.0371	0.29932	-0.25635	0.12695	143.351	-45.559	1533.5201	-2.5253	0.90205	-0.26904
2.028	-51.3036	11.35931	1335.5374	-2.3062	1.2095	-0.46045	20.4279	11.12	1479.462	-2.5757	1.1177	-0.44775	-24.274	19.8722	-3.37934	0.33594	-0.28906	0.10547	129.0355	-15.289	1531.495	-2.5532	1.0105	-0.3251
2.03	-53.8649	18.7723	1327.6009	-2.3003	1.1958	-0.45459	23.581	59.125	1493.2686	-2.5701	1.1272	-0.43896	-44.5658	2.0678	-9.9841	0.36548	-0.31323	0.095703	116.69922	-28.9445	1525.792	-2.5542	1.0845	-0.35693
2.032	-75.242	22.4133	1332.367	-2.2788	1.1841	-0.44385	-4.854	50.6142	1471.5866	-2.5625	1.1387	-0.43066	-13.834	42.7312	-7.1781	0.38623	-0.33154	0.085938	105.9476	-36.502	1516.842	-2.524	1.1041	-0.38848
2.034	-63.373	18.9864	1340.196	-2.2627	1.1763	-0.43896	-0.000300000000000189	-46.2117	1492.2518	-2.543	1.1465	-0.41699	2.643	24.16283	21.5904	0.40771	-0.35107	0.073242	85.7216	-97.32	1515.103	-2.4445	1.0759	-0.40059
2.036	-91.686	27.1712	1335.838	-2.248	1.1699	-0.43652	-9.0099	0.106999999999999	1488.754	-2.5254	1.1445	-0.41406	28.766	49.047	23.1729	0.41553	-0.34717	0.072754	88.2492	-96.964	1531.771	-2.3336	0.97128	-0.42012
2.038	-53.292	54.704	1317.51441	-2.2144	1.1528	-0.4292	-17.4117	-36.846	1470.517	-2.4922	1.1348	-0.39893	0.137	20.1621	35.4515	0.42188	-0.34766	0.060547	106.4518	-86.048	1530.819	-2.1975	0.79424	-0.421
2.04	-42.852	76.221	1300.2016	-2.1953	1.1445	-0.42578	-3.447	-21.4564	1505.3371	-2.4646	1.1194	-0.39062	22.249	44.635	39.2491	0.42651	-0.33764	0.054443	106.5937	-49.29	1527.348	-2.0645	0.58203	-0.4082
2.042	-31.3065	92.043	1275.681	-2.1582	1.1211	-0.41602	-44.3264	85.993	1451.0099	-2.4355	1.1016	-0.37549	-9.156	10.5822	31.30054	0.42236	-0.32568	0.04541	83.7868	-35.647	1505.1697	-1.9704	0.37978	-0.39268
2.044	-57.391	91.505	1262.712	-2.1257	1.0954	-0.41479	-68.918	12.332	1428.386	-2.3906	1.0762	-0.35547	28.329	43.3979	39.2255	0.40771	-0.3042	0.044434	84.0946	-34.1385	1472.2246	-1.9355	0.2044	-0.37763
2.046	-52.9706	82.169	1254.162	-2.0918	1.0713	-0.40137	-63.604	57.3478	1414.114	-2.3652	1.0586	-0.34131	34.965	16.65657	27.2883	0.39844	-0.28613	0.033203	69.5045	-22.387	1452.87927	-1.9726	0.075488	-0.36279
2.048	-29.76	73.182	1262.574	-2.0532	1.0396	-0.39746	-82.767	46.0802	1381.458	-2.3125	1.0254	-0.31934	33.029	43.477	16.65881	0.37305	-0.25	0.030273	56.694	11.278	1432.3164	-2.0737	-0.0027345	-0.34463
2.05	-29.08736	50.815	1241.39	-2.0308	1.02	-0.39111	-48.224	-2.224	1402.836	-2.2744	0.99168	-0.30298	24.809	17.6111	25.708	0.34912	-0.21801	0.030029	37.509	78.868	1414.682	-2.2129	-0.020996	-0.32715
2.052	-32.1859	38.7135	1225.0942	-1.9897	0.98486	-0.38037	-38.217	108.245	1380.956	-2.2319	0.96533	-0.2915	70.3548	56.128	33.238	0.32178	-0.1875	0.025879	0.198	81.27	1377.2293	-2.3802	0.021387	-0.32207
2.054	-42.7874	37.54	1212.876	-1.9627	0.95337	-0.37989	-77.46	98.918	1318.0511	-2.1655	0.9165	-0.28125	14.617	13.91871	25.1167	0.28467	-0.13965	0.01416	-43.943	138.346	1317.533	-2.5241	0.12862	-0.31748
2.056	-37.7499	53.6	1204.2032	-1.9297	0.92871	-0.36914	-55.4102	130.694	1299.7655	-2.1265	0.89893	-0.28271	21.788	34.7541	25.33037	0.26318	-0.11475	0.0078125	-35.154	149.823	1257.309	-2.6304	0.26729	-0.3335
2.058	-17.6944	69.8375	1186.9133	-1.8882	0.8999	-0.35107	-55.6333	197.253	1245.2647	-2.0508	0.87207	-0.2832	28.304	-3.9436	11.4382	0.22998	-0.066895	0.0078125	-56.89	158.589	1265.741	-2.6939	0.4211	-0.36387
2.06	-8.9088	77.674	1168.6107	-1.8687	0.88916	-0.34619	-20.8747	118.266	1237.157	-1.992	0.85328	-0.2793	18.433	17.195	24.3763	0.20386	-0.02832	-0.0073243	-67.092	183.453	1235.405	-2.7222	0.56689	-0.39502
2.062	-16.5534	70.682	1146.64	-1.8276	0.85986	-0.3335	-0.800999999999998	149.36	1251.467	-1.9312	0.83252	-0.27832	-17.097	-4.639	19.0029	0.18359	0.0073242	-0.01123	-47.169	164.721	1223.228	-2.7249	0.6876	-0.4374
2.064	-21.766	76.587	1139.547	-1.7976	0.83667	-0.323	-22.6247	133.069	1223.003	-1.8569	0.80518	-0.27246	7.259	19.9086	35.63	0.1582	0.050781	-0.019531	-59.697	192.703	1163.3136	-2.7129	0.79648	-0.47891
2.066	2.836	81.885	1119.946	-1.7612	0.81299	-0.31396	-28.3265	71.837	1220.05	-1.8198	0.79346	-0.27051	-30.368	4.401	29.726	0.15186	0.074219	-0.026367	-58.589	175.648	1113.461	-2.6828	0.86641	-0.50899
2.068	-8.089	106.515	1084.4994	-1.7183	0.78955	-0.30029	-22.1244	135.028	1177.101	-1.7456	0.76025	-0.26123	-39.9816	28.3478	27.289	0.13379	0.11768	-0.031738	-17.217	190.746	1107.418	-2.6515	0.9003	-0.54502
2.07	-18.9134	111.368	1070.228	-1.6992	0.77734	-0.29199	-8.367	72.919	1128.1679	-1.6953	0.74219	-0.25097	-29.785	3.9159	9.107	0.1228	0.1482	-0.042237	1.39	183.389	1123.976	-2.6265	0.90967	-0.59619
2.072	-19.6402	100.7447	1048.5504	-1.6499	0.7583	-0.28271	15.781	69.549	1116.7948	-1.6465	0.72266	-0.23828	-34.046	13.2937	29.4025	0.11182	0.1665	-0.04248	27.27	188.94	1112.629	-2.593	0.89531	-0.64218
2.074	-27.369	104.4566	1027.0102	-1.6138	0.7417	-0.27002	7.942	130.686	1085.4949	-1.5815	0.69385	-0.21875	-42.498	-9.0679	3.9423	0.094727	0.20459	-0.056152	28.24	181.0279	1053.415	-2.5418	0.86348	-0.66992
2.076	-39.7199	111.7	1004.236	-1.5776	0.72705	-0.26025	26.1704	68.026	1070.5662	-1.5405	0.67529	-0.21338	-19.011	9.72686	24.6371	0.09375	0.21631	-0.056641	9.969	173.4689	1042.855	-2.4778	0.8166	-0.67227
2.078	-49.19	130.18	977.169	-1.5313	0.71094	-0.25391	37.647	144.8669	1052.936	-1.4766	0.64258	-0.19873	-41.315	-1.052	-6.0961	0.076172	0.24658	-0.056152	-0.1236	179.6821	1014.877	-2.408	0.75449	-0.66719
2.08	-23.928	125.149	957.174	-1.5088	0.69727	-0.24561	37.6724	142.3028	1002.847	-1.4172	0.61939	-0.19262	-47.3946	13.8245	-5.6166	0.064453	0.26099	-0.059082	11.464	168.207	998.672	-2.353	0.68408	-0.66357
2.082	-40.8593	108.426	939.848	-1.4565	0.67236	-0.23389	40.735	95.811	970.765	-1.3647	0.59521	-0.18994	-22.809	24.31258	-4.248	0.051758	0.27881	-0.063477	17.6559	184.902	938.664	-2.2982	0.62568	-0.66592
2.084	-45.7433	110.618	917.2429	-1.4227	0.65137	-0.22437	56.291	179.182	928.541	-1.2886	0.56885	-0.18311	-24.811	36.5024	10.8215	0.029297	0.29639	-0.054688	49.1132	161.385	835.3857	-2.2512	0.57305	-0.66602
2.086	-36.71	105.1992	894.2236	-1.3848	0.62891	-0.2124	25.42	151.113	865.9231	-1.2554	0.55615	-0.17334	-13.216	49.084	-10.7291	0.020996	0.30225	-0.056641	49.6146	190.094	755.722	-2.211	0.53086	-0.65469
2.088	-16.831	114.1919	877.5674	-1.3433	0.59033	-0.19971	13.366	171.9491	844.2979	-1.1851	0.52686	-0.16504	-2.574	47.3066	30.749	0.0078125	0.31348	-0.053711	54.1084	208.668	707.451	-2.172	0.5042	-0.65186
2.09	-23.304	115.933	860.2907	-1.3223	0.57422	-0.19141	9.46	216.305	814.5911	-1.1348	0.50244	-0.15918	-6.402	24.56085	42.3027	-0.0009766	0.32032	-0.049561	45.4373	234.6829	685.323	-2.1387	0.48193	-0.64355
2.092	-25.979	119.668	837.511	-1.2651	0.5415	-0.1875	7.192	133.769	780.591	-1.0815	0.47705	-0.15625	-21.887	-17.77528	82.307	-0.0078125	0.32764	-0.04541	23.5062	256.056	654.34	-2.1049	0.4791	-0.63301
2.094	-34.108	128.244	821.209	-1.2109	0.52173	-0.18091	12.84	189.631	753.7693	-1.0098	0.44141	-0.14355	38.731	-42.1485	76.23	-0.019043	0.33252	-0.041504	33.052	234.138	602.5238	-2.0785	0.48027	-0.62265
2.096	-27.731	125.35	803.016	-1.1572	0.50195	-0.17285	-8.989	188.434	690.3318	-0.97559	0.42969	-0.14404	25.493	-47.4672	111.1537	-0.02832	0.33398	-0.037598	25.147	253.662	559.6311	-2.0457	0.48183	-0.61758
2.098	-10.012	115.365	775.939	-1.0879	0.47852	-0.16846	-10.076	160.42248	654.383	-0.91113	0.39941	-0.1377	28.727	-4.728	163.218	-0.038574	0.34033	-0.02832	-8.558	245.499	528.6642	-2.0049	0.48623	-0.60771
2.1	-28.037	121.301	750.4237	-1.0586	0.47217	-0.16406	-16.766	222.841	645.5258	-0.85693	0.38159	-0.13281	37.5132	-1.741	287.1012	-0.050049	0.34668	-0.023437	-33.7983	265.2	512.21518	-1.9629	0.48242	-0.59375
2.102	-14.505	123.5211	722.5912	-0.99756	0.45166	-0.16162	-13.708	155.5495	609.874	-0.80811	0.36426	-0.12451	21.558	-1.434	351.531	-0.062012	0.34814	-0.018555	-69.603	249.086	460.823	-1.9104	0.48086	-0.57383
2.104	12.073	122.977	698.0493	-0.96069	0.43384	-0.15942	2.202	147.8329	598.4184	-0.73779	0.33838	-0.125	-58.723	-68.6434	460.155	-0.07666	0.35498	-0.016602	-84.715	214.154	409.384	-1.8608	0.47744	-0.55498
2.106	-6.175	126.7135	663.73491	-0.92188	0.41797	-0.16016	-9.239	175.224	569.722	-0.70557	0.32471	-0.12256	-49.769631	-55.015	564.227	-0.081543	0.35889	-0.01416	-85.297	173.564	352.536	-1.814	0.46885	-0.53233
2.108	-10.153	127.3023	636.9599	-0.86523	0.39648	-0.15625	-22.3576	107.167	537.3517	-0.63477	0.29688	-0.1167	-103.7886	-78.177	751.787	-0.09082	0.3623	-0.0058594	-98.451	156.2238	307.893	-1.766	0.4586	-0.51387
2.11	5.42	133.272	624.964	-0.83984	0.38574	-0.15039	-4.995	175.105	507.9083	-0.58545	0.27344	-0.10864	-108.379	-26.741	825.576	-0.09375	0.37402	-0.0087891	-111.001	164.404	312.4073	-1.7129	0.44922	-0.49219
2.112	58.5673	139.926	606.577	-0.78906	0.35742	-0.146	-22.855	187.809	459.728	-0.53809	0.25195	-0.10303	-102.175	-28.762	885.41	-0.096191	0.375	-0.012207	-110.903	162.252	296.741	-1.6617	0.43672	-0.46192
2.114	18.116	137.683	593.839	-0.75073	0.33765	-0.14185	-5.304	157.693	442.921	-0.47021	0.22803	-0.10107	-80.991	-1.277	871.858	-0.09668	0.38184	-0.021484	-121.69	184.969	268.39	-1.6073	0.42763	-0.44346
2.116	2.602	140.139	542.78714	-0.71875	0.31787	-0.13916	21.323	200.541	420.468	-0.44482	0.21045	-0.098145	-64.772	-91.3424	907.482	-0.098878	0.37988	-0.033691	-103.851	161.007	242.092	-1.5479	0.42139	-0.42158
2.118	7.26	119.635491	522.2379	-0.66895	0.29297	-0.12842	20.442	131.4343	394.9038	-0.37891	0.18262	-0.097168	15.696	-93.679	937.997	-0.10303	0.37744	-0.056152	-87.035	177.652	210.892	-1.4981	0.41934	-0.40078
2.12	26.447	126.6512	505.015	-0.65137	0.28809	-0.12695	22.095	139.202	372.9434	-0.33447	0.16309	-0.09668	12.216	-118.851	993.731	-0.11719	0.37305	-0.099609	-84.122	177.766	189.575	-1.4429	0.42041	-0.37646
2.122	-12.152	134.09	474.815	-0.60889	0.27295	-0.11426	25.63	192.115	326.073	-0.29102	0.14063	-0.094727	30.23	-51.282	1024.327	-0.12646	0.36816	-0.12305	-75.377	165.777	195.062	-1.3911	0.4294	-0.36006
2.124	-19.358	127.941	465.366	-0.58203	0.26172	-0.11548	32.71	147.579	304.4136	-0.23535	0.10596	-0.10059	19.358	-113.219	1029.994	-0.17236	0.36865	-0.17627	-75.062	153.412	164.305	-1.3413	0.43974	-0.34209
2.126	15.899	121.4286	443.812	-0.55225	0.25049	-0.10498	34.575	195.519	270.0424	-0.20557	0.088379	-0.098633	32.194	-127.74182	1002.6797	-0.23511	0.37281	-0.22168	-69.493	109.29018	146.363	-1.2909	0.44795	-0.31748
2.128	12.329	116.865	426.85	-0.51123	0.24219	-0.098145	31.227	154.364	253.8638	-0.14551	0.05127	-0.104	-19.681	-261.86	999.851	-0.30371	0.38037	-0.26025	-46.278	128.796	101.255	-1.245	0.45596	-0.29521
2.13	-17.498	121.053	420.085	-0.49561	0.23877	-0.10156	48.958	102.0115	244.3429	-0.10596	0.025879	-0.10278	3.626	-231.837	1058.4374	-0.42773	0.39844	-0.29932	3.176	103.176	85.216	-1.1968	0.47119	-0.27246
2.132	-14.641	116.012	380.4446	-0.45557	0.22314	-0.095215	60.1434	151.571	236.4989	-0.069336	0.0029297	-0.10352	28.536	-259.582	1132.676	-0.5	0.41357	-0.31934	8.04	86.86499	75.769	-1.1505	0.4791	-0.25117
2.134	5.484	121.882	367.314	-0.42603	0.20972	-0.094483	54.3493	122.944	240.66	-0.03125	-0.029785	-0.1123	36.137	-129.84	1165.927	-0.66748	0.43359	-0.35498	34.91234	54.766	55.155	-1.1034	0.48955	-0.22334
2.136	-14.081	111.394	338.0306	-0.39844	0.19824	-0.093262	59.5028	133.047	213.3117	-0.014648	-0.043945	-0.11182	47.845	-179.019	1184.115	-0.76733	0.43872	-0.34546	64.4926	18.9055	72.5	-1.0522	0.49541	-0.20342
2.138	-35.78	99.5735	322.119	-0.35986	0.17676	-0.086914	27.101	138.571	180.068	0.01123	-0.062012	-0.11523	61.927	-189.944	1156.7656	-0.9585	0.49023	-0.40283	56.433	-10.694	26.22	-1.0015	0.49961	-0.18438
2.14	-28.622	100.1009	308.00789	-0.33887	0.16895	-0.077148	35.704	62.239	167.5934	0.021973	-0.079834	-0.11938	77.177	-291.082	1169.308	-1.2344	0.57813	-0.42578	79.119	-28.9494	38.424	-0.94482	0.50439	-0.16699
2.142	-1.998	113.335	304.16	-0.31445	0.146	-0.077148	25.89	101.8761	155.273	0.03418	-0.087891	-0.11719	120.3673	-266.098	1278.449	-1.3711	0.62305	-0.40625	71.455	-24.044	31.606	-0.88194	0.49814	-0.1501
2.144	-6.114	121.098	293.538	-0.28735	0.12549	-0.071777	21.783	86.523	137.772	0.038574	-0.09375	-0.12158	155.662	-307.622	1365.671	-1.6753	0.73779	-0.35938	70.2391	-25.537	44.014	-0.81914	0.49531	-0.13526
2.146	-45.345	113.514	278.958	-0.26758	0.11328	-0.070313	22.6651	50.4997	156.316	0.029785	-0.087402	-0.12744	101.1588	-246.351	1400.816	-1.9178	0.83521	-0.31128	88.896	-3.463	33.39	-0.7543	0.48945	-0.11963
2.148	-21.988	100.373	262.528	-0.24268	0.09082	-0.062988	-9.04	90.048	135.313	0.010254	-0.073242	-0.14063	84.8075	-316.65	1384.77	-2.1733	0.93701	-0.27588	84.582	-7.722	24.789	-0.68916	0.47558	-0.10576
2.15	-2.995	100.595	252.475	-0.22949	0.083496	-0.063965	-22.2266	38.8177	107.4417	0.026611	-0.06958	-0.11524	68.631	-276.1269	1390.656	-2.4741	1.0845	-0.24854	40.4245	27.222	19.6696	-0.63086	0.46338	-0.088379
2.152	13.602	93.526	230.4763	-0.22754	0.074219	-0.080078	2.40600000000001	55.7348	66.5001	0.052734	-0.08252	-0.07959	81.054	-290.353	1437.454	-2.5801	1.1602	-0.23047	22.484	20.9449	19.6649	-0.57802	0.44561	-0.079492
2.154	-8.77399999999999	81.2248	223.921	-0.21533	0.066162	-0.066406	-8.617	88.437	60.2675	0.063965	-0.085449	-0.061035	57.384	-225.1445	1493.379	-2.689	1.2759	-0.21045	13.523	13.2179	16.9439	-0.52969	0.42305	-0.072461
2.156	11.832	74.8413	219.4264	-0.1875	0.055176	-0.04834	-22.272	32.4537	69.1728	0.060547	-0.083984	-0.059082	51.6585	-176.1194	1515.372	-2.6687	1.3361	-0.21558	-23.205	20.1091	-20.532	-0.48672	0.40313	-0.065039
2.158	23.335	82.093	199.5721	-0.13867	0.023926	-0.023926	-24.188	71.337	62.82	0.049316	-0.063965	-0.060059	25.889	-118.1961	1523.4412	-2.5972	1.3696	-0.22412	-13.376	2.9961	-31.1981	-0.44903	0.37695	-0.053515
2.16	-9.516	83.349	191.6351	-0.11475	0.0068359	-0.015625	-30.7818	48.918	40.574	0.040039	-0.05249	-0.05542	46.537	-96.0402	1507.7496	-2.4277	1.3477	-0.25391	-25.784	38.0281	-30.3529	-0.41406	0.35254	-0.036133
2.162	4.234	80.055	182.375	-0.086914	-0.015137	-0.016602	-29.3662	8.101	41.784	0.037598	-0.039063	-0.048828	32.315	-83.121	1550.289	-2.3237	1.2974	-0.26318	-41.0744	33.5676	-18.4072	-0.39463	0.31758	-0.014649
2.164	13.499	73.29	187.454	-0.071045	-0.027832	-0.018798	-18.197	53.557	33.364	0.035156	-0.019531	-0.030762	12.916	-72.04	1568.2913	-2.0098	1.0459	-0.31836	-41.4402	58.6847	-1.4092	-0.38164	0.28545	-0.0057617
2.166	30.762	78.491	184.046	-0.055176	-0.038574	-0.013184	-21.012	4.1285	28.9017	0.037598	-0.020508	-0.02832	-25.624	-62.199	1585.0697	-1.7273	0.89672	-0.35596	-76.2169	59.6728	15.0642	-0.38047	0.25576	0.0043945
2.168	1.703	77.155	160.7653	-0.036621	-0.055664	-0.015137	-31.984	34.888	5.382	0.038086	-0.0058594	-0.02002	-42.464	-44.54	1567.3017	-1.6348	0.90625	-0.37891	-65.8454	60.7943	31.6627	-0.38164	0.2291	0.011719
2.17	0.445	74.1454	130.3345	-0.029297	-0.063477	-0.013672	-15.501	53.598	13.2163	0.04834	0.00097656	-0.011719	-46.17	-44.901	1578.1519	-1.9858	1.0142	-0.38623	-43.708	59.628	28.6693	-0.38379	0.21191	0.024414
2.172	19.522	59.8547	137.68	-0.0068359	-0.070801	-0.00048828	-2.47	-12.28262	34.3579	0.05127	-0.0024414	-0.011719	-38.093	-61.305	1610.444	-2.1641	1.0518	-0.3418	-43.638	36.9845	41.781	-0.38614	0.1959	0.031347
2.174	29.709	68.959	135.2177	0.0063476	-0.085694	-0.00048827	-10.646	10.227	31.1783	0.057129	-0.0053711	-0.00097656	-45.9048	-119.1617	1648.9664	-2.3516	1.084	-0.2832	-73.334	26.938	27.056	-0.38906	0.18438	0.038183
2.176	7.627	69.329	124.0075	0.016113	-0.094238	-0.0019531	18.288	-12.4844	9.4545	0.06543	-0.015869	0.011231	-66.826	-117.207	1622.9382	-2.378	1.0694	-0.34863	-67.9163	-3.714	31.9139	-0.38398	0.17734	0.045214
2.178	0.942999999999998	75.887	105.1567	0.026367	-0.10107	-0.0048828	30.594	-28.702	9.2508	0.065918	-0.023438	0.017578	-86.6536	-128.946	1620.584	-2.3218	1.0298	-0.42139	-56.2463	2.00517	38.387	-0.38066	0.16719	0.05293
2.18	13.342	72.993	101.859	0.033203	-0.10498	-0.0048828	10.933	30.943	-13.89155	0.064453	-0.041504	0.029297	-73.681	-78.954	1613.019	-2.2358	0.89111	-0.45361	-34.239	-9.2159	45.603	-0.36914	0.16309	0.052734
2.182	-16.098	66.215	91.289	0.044922	-0.11621	0.0014648	27.5166	-6.9342	2.5534	0.0625	-0.043457	0.033203	-57.9453	-102.0465	1663.123	-2.2344	0.8916	-0.47461	6.678	25.6105	61.372	-0.35195	0.15371	0.055469
2.184	-13.621	57.653	97.798	0.048096	-0.12134	-0.003418	20.215	10.5958	13.4681	0.055176	-0.053223	0.047363	-16.027	-59.0506	1642.496	-2.2988	1.0117	-0.51953	19.429	16.2457	44.188	-0.33106	0.14023	0.057812
2.186	-0.478999999999999	44.158	79.4902	0.053711	-0.12646	-0.0019531	21.056	34.596	-6.4651	0.052246	-0.061768	0.060303	17.848	-94.01	1658.315	-2.3542	1.075	-0.51538	17.704	17.3549	48.715	-0.30449	0.12735	0.059766
2.188	-4.862	45.6611	67.9201	0.065918	-0.13135	0.0014648	35.3686	-6.93957	13.199	0.047852	-0.06543	0.067871	-9.413	-38.2785	1612.921	-2.4214	1.1313	-0.53174	22.2666	25.6006	35.5447	-0.27842	0.11768	0.057617
2.19	-10.962	49.017	65.1586	0.065918	-0.13232	0	38.446	46.92	17.2654	0.042969	-0.075195	0.080078	-48.1472	-36.265	1578.7495	-2.5098	1.1924	-0.57227	81.31559	0.944100000000001	56.562	-0.25439	0.10791	0.057617
2.192	-24.939	45.46	75.7064	0.068359	-0.13379	0.0039063	5.172	49.676	-3.6641	0.037109	-0.077148	0.089355	-25.286	48.6926	1514.946	-2.5444	1.2212	-0.58154	60.6553	25.4887	31.473	-0.22598	0.10098	0.067285
2.194	-19.616	38.294	77.832	0.067627	-0.13355	0.0061035	31.361	34.338	1.7847	0.039551	-0.07666	0.097656	11.023	26.3064	1527.158	-2.6133	1.2852	-0.57617	71.708	-12.526	18.987	-0.19629	0.089356	0.073242
2.196	-16.007	43.212	65.225	0.068359	-0.13477	0.0043945	19.869	68.508	-7.1435	0.04126	-0.077636	0.10547	52.129	69.752	1530.608	-2.6424	1.3342	-0.5774	76.776	0.00799999999999912	9.491	-0.16504	0.06748	0.080664
2.198	3.335	47.861	56.3668	0.067871	-0.13721	0.0083008	9.728	0.3748	-2.9516	0.044434	-0.081055	0.11133	55.65658	1.838	1555.858	-2.6563	1.375	-0.58008	57.1576	-8.628	-2.4245	-0.13994	0.046192	0.08125
2.2	-25.379	27.601	55.348	0.062012	-0.13672	0.010742	18.379	15.09797	27.3867	0.04834	-0.081543	0.11816	34.448	68.657	1480.0275	-2.646	1.3989	-0.59326	55.40433	22.7037	32.8781	-0.12891	0.025391	0.082031
2.202	-18.856	22.943	48.265	0.052734	-0.13232	0.015137	-14.225	44.679	14.8359	0.052734	-0.081055	0.1167	41.0039	39.108	1456.75	-2.6304	1.397	-0.59131	56.9686	30.389	24.28013	-0.12178	0.0085937	0.086524
2.204	4.542	24.824	43.3112	0.027832	-0.12842	0.016602	-19.891	10.9599	21.3644	0.060059	-0.09082	0.12207	19.318	117.787	1418.677	-2.605	1.4165	-0.59375	53.2328	13.489	14.022	-0.12139	-0.005957	0.093067
2.206	-8.712	32.484	38.3457	0.017578	-0.12646	0.020508	0.318999999999999	65.479	21.9647	0.063721	-0.0979	0.12427	33.28	57.5599	1428.7386	-2.6323	1.4585	-0.58448	19.0143	-1.514	-14.20331	-0.11943	-0.023535	0.10752
2.208	-8.618	20.6729	31.8113	-0.0043945	-0.11963	0.027344	-33.2219	32.5232	16.2813	0.069336	-0.10156	0.12451	38.157	84.196	1382.97433	-2.6934	1.5059	-0.56738	29.356	-36.693	-4.15929	-0.11592	-0.040528	0.12139
2.21	-11.297	19.64798	47.406	-0.022949	-0.11328	0.032226	-22.688	-3.6997	24.7283	0.074707	-0.10498	0.11865	48.7112	22.849	1398.454	-2.7637	1.5723	-0.54883	-5.318	-5.5084	-1.574	-0.11035	-0.058105	0.13428
2.212	15.218	29.817	28.9567	-0.043457	-0.10889	0.03418	-19.249	20.00197	22.3198	0.080078	-0.11279	0.12012	13.361	77.5603	1389.911	-2.7695	1.5996	-0.55078	-8.447	6.4911	11.316	-0.10244	-0.069336	0.15156
2.214	-0.707000000000001	32.942	23.1023	-0.070801	-0.097168	0.041504	-42.5977	-6.7892	22.88	0.088379	-0.11865	0.11572	10.6149	58.058	1393.8529	-2.7266	1.625	-0.56104	-2.32	41.2226	16.131	-0.095703	-0.084864	0.15839
2.216	6.641	34.669	27.7379	-0.085938	-0.094727	0.044922	-16.3	23.4145	48.575	0.092773	-0.12134	0.11304	-17.865	153.911	1375.1804	-2.6538	1.6147	-0.58008	-46.177	32.0751	-12.9182	-0.079297	-0.092676	0.16934
2.218	14.758	17.0663	35.814	-0.10645	-0.080566	0.050293	-21.302	47.948	40.013	0.097656	-0.12891	0.10547	0.0380000000000003	124.5488	1336.0952	-2.5625	1.584	-0.58789	-55.8007	33.2657	16.536	-0.048047	-0.098535	0.17422
2.22	22.919	11.7191	26.8619	-0.12402	-0.06958	0.058593	-14.741	7.0643	29.405	0.09668	-0.13477	0.10059	-13.185	161.451	1300.899	-2.4297	1.5117	-0.58301	-69.702	65.773	7.346	-0.012207	-0.097168	0.18457
2.222	10.321	10.0321	24.8065	-0.13672	-0.060059	0.063965	-15.898	52.496	18.3687	0.097168	-0.1333	0.093262	2.763	99.881	1261.621	-2.377	1.4727	-0.57861	-60.7312	60.8307	24.4346	0.036231	-0.096191	0.18281
2.224	12.521	15.951	11.3596	-0.15234	-0.050781	0.066895	-3.988	35.3138	16.9036	0.091309	-0.13574	0.089355	-51.787	165.142	1221.2222	-2.2969	1.3867	-0.56445	-62.4385	82.98	28.5946	0.075195	-0.088672	0.17276
2.226	33.8968	15.848	17.3044	-0.15771	-0.041992	0.066406	-7.421	18.6374	39.788	0.08789	-0.12989	0.082031	-38.21038	153.816	1188.857	-2.2574	1.3325	-0.54443	-62.1333	36.0813	9.2559	0.1205	-0.080078	0.16377
2.228	11.871	22.5467	24.8565	-0.16846	-0.028809	0.078125	-0.381	50.737	31.568	0.081543	-0.12598	0.078613	-65.59601	212.447	1164.8946	-2.2295	1.2852	-0.52734	-71.134	22.6052	8.2165	0.16982	-0.080664	0.15019
2.23	-12.777	27.9284	11.7761	-0.17675	-0.02124	0.074707	3.877	-2.2149	18.035	0.066895	-0.11621	0.075195	-52.6566	183.996	1122.9864	-2.1904	1.2402	-0.50293	-61.0716	10.96498	22.1178	0.22266	-0.085449	0.13672
2.232	1.809	17.8998	13.08	-0.18311	-0.012207	0.076172	11.285	7.9079	15.3151	0.060059	-0.10596	0.072754	-65.117	232.702	1112.444	-2.1694	1.2153	-0.49268	-4.719	28.128	62.433	0.26494	-0.094629	0.11758
2.234	21.11	9.00335	22.3027	-0.1875	0.00048828	0.07959	21.749	20.028	7.5849	0.041016	-0.09082	0.066895	-18.672	210.547	1056.0733	-2.1035	1.1855	-0.47607	-27.125	34.805	56.022	0.31523	-0.1042	0.10547
2.236	-4.148	9.5037	27.9199	-0.18701	0.0019531	0.081543	23.711	-21.9598	27.9374	0.030762	-0.073974	0.063232	-28.62	266.34	1068.414	-2.0483	1.1684	-0.45996	-8.562	19.7827	56.998	0.36523	-0.12178	0.095312
2.238	-8.61	12.68422	23.5279	-0.18262	0.0058594	0.080078	34.2269	36.566	41.416	0.016602	-0.0625	0.061035	-32.80594	229.295	1039.8149	-1.9863	1.1484	-0.44824	-1.0332	22.2018	18.1942	0.41026	-0.15264	0.08584
2.24	1.422	19.1154	11.8619	-0.17407	0.0095214	0.075683	11.8128	5.51795	29.955	0.0048828	-0.040527	0.055176	-40.005	234.356	1025.948	-1.9004	1.1211	-0.4375	4.061	-14.2299	42.0528	0.44385	-0.17188	0.081055
2.242	-16.004	27.8136	10.5626	-0.16406	0.0083008	0.074219	38.50724	-17.5157	44.725	-0.003418	-0.032227	0.053711	-6.756	186.369	953.656	-1.8608	1.1089	-0.43115	31.0893	8.18781	56.993	0.46778	-0.1957	0.073144
2.244	-14.691	37.3171	26.686	-0.14746	0.0014648	0.072266	24.279	8.1072	24.379	-0.01416	-0.0053711	0.053223	21.994	194.208	914.218	-1.7788	1.0649	-0.41895	58.628	-22.2304	68.0672	0.48359	-0.21231	0.066602
2.246	-23.296	23.5842	19.66459	-0.1377	0.00048828	0.076172	12.526	-24.6379	4.161	-0.01709	0.010742	0.046875	65.1765	173.837	864.456751	-1.7183	1.0303	-0.40772	69.5932	-9.3904	36.877	0.49649	-0.22168	0.06582
2.248	-6.744	19.1305	13.1474	-0.1167	-0.01123	0.065918	30.953	6.6767	4.3967	-0.021973	0.026367	0.038574	17.682	202.981	852.754	-1.6577	0.98877	-0.39404	42.82003	-23.5926	10.0594	0.50498	-0.22764	0.063281
2.25	-6.944	23.48165	9.6096	-0.099121	-0.019775	0.063721	1.596	22.313	-12.5112	-0.023926	0.044434	0.043457	38.8301	197.458	791.7596	-1.5859	0.93359	-0.37305	58.3409	-11.485	19.3541	0.50342	-0.22412	0.058105
2.252	-7.927	23.72533	24.4248	-0.088867	-0.02832	0.061523	11.2016	-3.912881	5.6756	-0.021484	0.041016	0.032227	45.598	193.2904	768.3699	-1.5503	0.90381	-0.3623	58.0116	29.1248	24.8793	0.48604	-0.20713	0.052441
2.254	-21.501	16.0096	32.3004	-0.064453	-0.041016	0.056641	17.613	28.685	19.2609	-0.016113	0.05957	0.032715	77.993754	180.0983	716.5734	-1.478	0.85205	-0.34033	86.5231	3.2568	53.086	0.4624	-0.1831	0.039062
2.256	-21.564	22.2336	21.5243	-0.05127	-0.04541	0.055664	4.531	2.48772	21.711	-0.010986	0.069336	0.026855	87.719	185.918	695.923	-1.4314	0.80786	-0.32446	90.516	32.5461	1.094	0.4292	-0.14834	0.024219
2.258	9.18	20.5827	24.9258	-0.033203	-0.063965	0.047852	-8.019	5.0811	10.5362	-0.003418	0.073242	0.022461	95.44415	207.8935	634.346	-1.3809	0.76563	-0.30859	32.2945	0.8436	-34.7799	0.39804	-0.10781	0.013965
2.26	-22.23	12.5175	48.6242	-0.016358	-0.067627	0.042969	-11.688	50.3	6.3302	0.015137	0.075195	0.019043	67.874	227.296	590.402	-1.314	0.72119	-0.27881	15.4389	14.7625	-29.7074	0.36377	-0.063965	0.0053711
2.262	-6.46	-2.65	59.5385	0.00048828	-0.077637	0.039551	-28.392	31.888	-6.449	0.021973	0.077637	0.016602	43.266	224.037	538.8373	-1.2852	0.69043	-0.27148	10.135	22.2912	-12.3534	0.33526	-0.019336	-0.0055664
2.264	-5.286	-4.911	59.433	0.01416	-0.090332	0.027344	-35.862	33.344	-5.524	0.036133	0.074219	0.011719	31.124	203.686	515.5378	-1.2202	0.64014	-0.24561	0.32	34.5758	27.242	0.30596	0.024512	-0.0096678
2.266	25.93	-3.647	49.7722	0.021484	-0.098633	0.023926	-20.121	24.5388	-8.9781	0.047607	0.07251	0.0053711	57.991	204.147	476.215	-1.1729	0.6101	-0.22974	-1.88	29.37358	32.306	0.27197	0.065528	-0.018262
2.268	-0.611999999999998	-9.42	57.0545	0.03418	-0.11133	0.0092773	-32.957	-22.5627	1.42182	0.061523	0.067383	-0.0048828	76.864	192.602645	436.61148	-1.1147	0.5874	-0.21826	-5.962	-24.393	59.0973	0.23701	0.10469	-0.025
2.27	13.887	-27.22	83.505	0.036865	-0.11987	0.0039063	-19.926	8.507	17.612	0.082031	0.056152	-0.018066	56.231	220.056	390.9114	-1.0415	0.54346	-0.2041	-37.832	-25.135	61.16019	0.20264	0.13818	-0.036133
2.272	36.453	-47.472	85.018	0.040039	-0.12354	-0.017578	-14.965	14.45	9.2022	0.094238	0.046875	-0.024414	9.772	208.3953	364.7971	-1.002	0.52051	-0.19434	-77.9932	-29.649	134.572	0.16621	0.16982	-0.044727
2.274	3.224	-56.641	103.5967	0.032227	-0.13623	-0.022949	-13.853	14.0838	11.9508	0.11133	0.036621	-0.035156	-6.555	219.794	327.3957	-0.92432	0.47803	-0.18604	-80.77	34.638	199.285	0.13321	0.19912	-0.053418
2.276	9.5	-43.163	119.7929	0.026855	-0.13721	-0.029297	-14.528	54.985	3.5446	0.12597	0.022217	-0.053222	-20.169	166.9477	301.8461	-0.86133	0.44189	-0.17749	-71.115	24.72	233.1847	0.09961	0.2249	-0.060449
2.278	27.164	-30.2432	148.618	0.0063477	-0.14209	-0.039551	-9.578	21.1656	9.027	0.13818	0.018066	-0.055664	20.378	156.076	279.844	-0.80469	0.41211	-0.17041	-75.111	3.20399999999999	258.277	0.068457	0.24853	-0.06377
2.28	43.482	14.14927	207.2923	-0.010254	-0.14234	-0.044678	8.387	19.3289	22.01	0.15283	0	-0.069336	-2.411	118.504	281.662	-0.71875	0.36426	-0.16016	-82.532	-29.3653	291.342	0.036621	0.26953	-0.063477
2.282	16.532	46.396	292.6808	-0.032227	-0.14014	-0.052734	-7.179	38.312	7.6585	0.16309	-0.0029297	-0.08252	-24.099	169.394	266.077	-0.68164	0.33203	-0.1582	-111.287	-10.53143	438.104	0.0020509	0.28086	-0.056348
2.284	22.001	65.78	369.891	-0.070313	-0.13818	-0.064453	-0.112000000000002	7.4008	25.347	0.18213	-0.013184	-0.092773	-37.669	161.5545	243.462	-0.60742	0.27148	-0.14453	-101.1	67.508	597.795	-0.025293	0.29297	-0.051855
2.286	30.445	37.3441	417.359	-0.09668	-0.13428	-0.069824	16.195	51.545	21.285	0.18921	-0.027344	-0.10425	-38.339	202.752	203.709	-0.53467	0.23047	-0.14014	-81.509	74.563	761.438	-0.053808	0.30078	-0.042481
2.288	28.642	33.814	442.2728	-0.15234	-0.12695	-0.095215	3.63	42.343	17.4164	0.19434	-0.037598	-0.11816	-28.347	139.747	185.748	-0.49854	0.2085	-0.13916	-65.505	96.461	849.758	-0.075781	0.31045	-0.036914
2.29	12.588	39.3489	507.192	-0.20581	-0.11303	-0.11743	22.623	21.2888	17.1795	0.20459	-0.044922	-0.13574	-31.595	141.804	170.48888	-0.42773	0.15625	-0.12744	-62.97	24.9732	963.2231	-0.098145	0.30859	-0.027344
2.292	11.228	25.322	561.012	-0.26465	-0.092773	-0.13574	31.913	40.8366	38.1146	0.21191	-0.053223	-0.14307	-14.709	87.910217	164.433	-0.38086	0.11108	-0.11987	-72.94	-11.975	1072.982	-0.11201	0.31094	-0.022363
2.294	35.338	19.455	593.581	-0.3623	-0.070313	-0.14893	9.275	-13.138	60.3036	0.21973	-0.0625	-0.16602	-10.36	142.408	133.55	-0.33154	0.072754	-0.11328	-49.604	-54.96	1208.425	-0.1207	0.31065	-0.018555
2.296	13.309	6.078	580.2496	-0.41504	-0.053711	-0.15967	30.156	-19.784	98.929976	0.22046	-0.076661	-0.18995	3.578	111.644	123.779	-0.25977	0.022949	-0.096191	-25.2106	-68.605	1322.887	-0.12813	0.30986	-0.013477
2.298	-8.352	-37.339	559.984	-0.54492	-0.03125	-0.15723	21.3455	11.899	97.6624	0.21777	-0.087402	-0.21387	-2.22600000000001	144.01	89.558	-0.22705	-0.00097656	-0.086914	26.215	-99.081	1319.196	-0.13653	0.30918	-0.011816
2.3	-12.1964	-74.529	584.5	-0.66382	-0.0085447	-0.15698	13.472	-28.7791	133.459	0.21387	-0.089844	-0.25537	9.931	74.811	76.691	-0.16455	-0.054199	-0.083496	73.342	-188.9487	1267.552	-0.14307	0.31006	-0.0063477
2.302	-24.8271	-58.886	592.244	-0.78662	0.022949	-0.14551	58.978	-3.553	176.435	0.19824	-0.086426	-0.26514	32.323	101.853	59.296	-0.13379	-0.093752	-0.082032	74.9292	-254.222	1208.383	-0.14366	0.30527	-0.0035156
2.304	-7.9729	-13.973	620.984	-0.95703	0.06543	-0.11328	40.435	-17.137	193.329	0.16309	-0.086426	-0.29834	40.267	44.62917	65.462	-0.097656	-0.12939	-0.078613	138.471	-316.536	1207.171	-0.15196	0.30302	-0.00019531
2.306	-10.3058	19.131	642.948	-1.0464	0.085938	-0.089355	42.411	-30.5218	285.395	0.1145	-0.086914	-0.31324	34.81	88.647	77.855	-0.058594	-0.18066	-0.076172	153.781	-310.617	1210.141	-0.15117	0.2999	0.0048828
2.308	-16.235	21.539	653.782	-1.2319	0.13379	-0.045898	42.687	46.6118	398.867	0.048828	-0.075684	-0.33398	44.4189	36.3199	89.769	-0.042969	-0.19336	-0.078613	179.0487	-318.837	1200.3349	-0.15	0.29512	0.0027344
2.31	-65.9271	26.018	666.283	-1.3845	0.18506	-0.023438	33.166	48.877	526.4487	-0.077148	-0.058594	-0.35889	43.015	56.929	49.513	-0.016602	-0.22314	-0.072754	160.0783	-301.656	1175.125	-0.14258	0.28906	0.0029297
2.312	-25.899	25.8163	688.648	-1.5488	0.25195	-0.0053711	37.437	48.1181	615.87	-0.15234	-0.042969	-0.37646	39.375	-12.1165	23.033	1.0408e-14	-0.23511	-0.08252	128.0666	-299.689	1163.179	-0.12686	0.28193	-0.0039063
2.314	-5.424	2.973	737.045	-1.7559	0.36426	0.00048828	29.789	57.509	640.4935	-0.30664	-0.015625	-0.39258	43.075	15.7378	9.7559	0.012207	-0.23975	-0.087891	71.759	-281.273	1218.101	-0.10869	0.27237	-0.011426
2.316	16.427	12.209	755.215	-1.8379	0.43164	0.0053711	15.306	-9.3732	722.3882	-0.4414	0.010987	-0.39868	42.25	-14.7455	28.2597	0.03418	-0.24316	-0.091309	59.943	-215.415	1251.771	-0.088379	0.26299	-0.029785
2.318	17.331	-3.092	746.039	-1.9531	0.57031	0.011719	7.835	-18.187	801.922	-0.58936	0.042969	-0.40723	25.231	36.971	28.8991	0.041504	-0.24365	-0.094238	84.6316	-170.789	1280.33	-0.067676	0.24941	-0.050391
2.32	1.09399999999999	-32.92	737.1928	-1.977	0.65381	0.0058595	4.269	-50.563	853.367	-0.80908	0.091797	-0.40527	49.445	11.9639	34.877	0.048828	-0.24219	-0.09375	75.285	-91.5	1302.667	-0.060547	0.23486	-0.080566
2.322	15.684	-72.107	742.432	-1.9688	0.73242	-0.013184	7.938	-83.837	851.143	-0.92773	0.12256	-0.40039	9.049	20.8642	30.3687	0.055908	-0.23584	-0.094238	75.01929	-91.1	1340.2404	-0.077441	0.21855	-0.10762
2.324	38.489	-118.312	761.869	-1.9023	0.83594	-0.069824	2.1895	-70.71	810.397	-1.1753	0.18359	-0.36328	-7.198	-33.2395	30.263	0.057617	-0.22412	-0.088867	40.93	-98.864	1371.796	-0.11826	0.20654	-0.12197
2.326	69.244	-139.4527	791.9109	-1.8496	0.88281	-0.098633	-12.4434	-109.215	770.528	-1.3967	0.24976	-0.30029	-22.106	-10.2807	15.6855	0.052734	-0.21484	-0.088867	68.169	-182.258	1415.828	-0.18037	0.19756	-0.12315
2.328	46.597	-166.128	840.874	-1.73	0.95752	-0.13867	-10.44861	-101.006	771.8475	-1.6602	0.33691	-0.23633	-0.396999999999998	5.786	-11.7294	0.044434	-0.2124	-0.083984	30.396	-240.8075	1439.3121	-0.2793	0.18692	-0.12061
2.33	12.468	-172.748	887.408	-1.6416	0.9707	-0.1582	4.31244	-53.336	794.362	-2.0972	0.51416	-0.16162	-20.84	49.549	3.064	0.037109	-0.19775	-0.07666	-7.808	-291.4137	1475.2371	-0.396	0.16895	-0.12207
2.332	-3.338	-169.616	927.334	-1.5674	0.96289	-0.17188	-31.0614	-86.1205	828.922	-2.3281	0.62109	-0.13184	-24.858	33.762	-15.5886	0.020752	-0.19018	-0.074219	-47.1999	-311.329	1502.436	-0.52324	0.15449	-0.12402
2.334	-9.316	-159.102	948.1908	-1.4858	0.88721	-0.18311	-49.412	-89.478	881.6	-2.7515	0.85498	-0.088867	-67.9951	34.3166	6.9566	0.0073242	-0.17627	-0.061523	-88.311	-325.753	1517.182	-0.65576	0.14072	-0.12373
2.336	5.767	-144.6722	970.1368	-1.4585	0.82471	-0.19141	-82.924	-116.006	880.974	-2.9663	1.0459	-0.074951	-54.8461	9.4758	-9.8379	-0.021973	-0.16602	-0.055664	-67.686	-332.477	1566.373	-0.79092	0.13799	-0.1292
2.338	37.264	-131.388	1026.763	-1.4058	0.65967	-0.19092	-46.444	-179.814	908.933	-3.0508	1.2217	-0.063477	-35.797	12.3854	4.7756	-0.037598	-0.15723	-0.049316	-65.9793	-291.266	1583.365	-0.93008	0.13252	-0.13262
2.34	56.327	-101.926	1054.519	-1.3709	0.52344	-0.19555	22	-131.374	948.521	-2.9004	1.418	-0.069336	-25.452	38.267	14.3098	-0.066406	-0.13867	-0.040527	-60.5184	-266.376	1616.657	-1.0879	0.1416	-0.14697
2.342	55.969	-70.29	1063.356	-1.353	0.39404	-0.19775	28.501	-96.2	927.33	-2.7578	1.4902	-0.10254	-56.043	43.95	32.3921	-0.087158	-0.13037	-0.033936	-73.656	-164.0159	1626.392	-1.2578	0.16875	-0.15019
2.344	43.6289	-44.63	1102.254	-1.3569	0.25146	-0.21436	7.864	-80.02	962.398	-2.4082	1.6055	-0.19434	-21.099	56.514	8.0086	-0.10352	-0.11719	-0.022461	-46.086	-87.901	1635.027	-1.4418	0.21367	-0.14141
2.346	70.296	-56.026	1115.8878	-1.377	0.19873	-0.22656	13.2784	-77.567	945.49	-2.1492	1.6413	-0.27246	-32.853	26.7003	25.2114	-0.12549	-0.10156	-0.0092773	-22.64295	-18.392	1648.276	-1.6481	0.27109	-0.13555
2.348	60.302	-66.578	1109.802	-1.4336	0.13867	-0.23828	-24.1865	-177.016	964.932	-1.9448	1.6138	-0.33545	-14.794	19.4658	-0.873000000000001	-0.1333	-0.097168	-0.00048828	16.875	18.409	1660.231	-1.857	0.33984	-0.11689
2.35	51.655	-72.027	1118.848	-1.4958	0.13062	-0.24512	21.2086	-222.096	1050.298	-1.771	1.4087	-0.37939	-13.252	-3.7646	28.8719	-0.14453	-0.081543	0.01416	27.341	3.396	1653.485	-2.062	0.4126	-0.097656
2.352	21.341	-76.0671	1143.9427	-1.5723	0.14844	-0.24658	19.5474	-232.763	1114.1809	-1.7207	1.2393	-0.37891	9.741	36.137	19.3809	-0.15039	-0.070556	0.025147	23.175	-1.552	1607.208	-2.2708	0.47959	-0.10137
2.354	25.592	-63.442	1183.8647	-1.6719	0.2168	-0.24902	-17.151	-255.446	1179.292	-1.6323	0.85791	-0.35596	-5.611	24.0999	11.454	-0.15381	-0.061035	0.038086	1.11	-21.313	1590.486	-2.4477	0.56328	-0.12607
2.356	7.233	-48.2865	1226.017	-1.7183	0.26221	-0.25146	-51.3714	-227.084	1203.749	-1.6008	0.59936	-0.33886	23.969	58.631	13.15807	-0.15137	-0.053711	0.055176	-12	-42.90298	1589.624	-2.5789	0.65781	-0.16201
2.358	-15.518	-52.52311	1249.2924	-1.8027	0.36523	-0.26074	-122.829	-233.62	1182.1659	-1.5859	0.38672	-0.3291	23.639	16.4039	37.755	-0.14795	-0.04834	0.063477	1.012	-81.592	1603.3736	-2.6484	0.75439	-0.18897
2.36	-0.445999999999998	-72.546	1298.84	-1.8535	0.43603	-0.26342	-64.78542	-238.754	1233.584	-1.6211	0.17383	-0.31738	29.44	33.652	27.587	-0.13965	-0.047852	0.072266	28.6022	-101.242	1596.3305	-2.6655	0.86377	-0.2085
2.362	10.43	-79.492	1307.352	-1.8979	0.50635	-0.27197	-0.304000000000002	-143.279	1295.648	-1.6641	0.10352	-0.31055	40.738	-4.4909	43.3533	-0.12402	-0.048828	0.082764	67.05	-107.146	1568.027	-2.6447	0.9543	-0.2207
2.364	44.599	-59.0925	1307.021	-1.9565	0.57861	-0.27246	2.118	-103.885	1357.5085	-1.7886	0.027344	-0.27832	48.444	66.247	16.2398	-0.10791	-0.04834	0.090332	36.1915	-86.058	1578.4955	-2.5952	1.038	-0.22783
2.366	53.197	-37.232	1328.792	-1.9917	0.61377	-0.27393	33.66	-63.395	1400.743	-1.9209	0.041016	-0.26074	10.274	30.255	33.137	-0.079102	-0.05957	0.10059	35.363198	-42.176	1573.522	-2.5362	1.0751	-0.23877
2.368	68.749	-33.855	1322.365	-2.0742	0.67969	-0.27832	24.676	-17.135	1378.961	-2.0586	0.11523	-0.25977	45.651	71.464	28.003	-0.068359	-0.066895	0.10254	43.2099	-16.53535	1597.754	-2.4955	1.0728	-0.25938
2.37	66.53	-28.846	1322.587	-2.1306	0.72388	-0.28344	38.6787	-57.328	1392.674	-2.2319	0.30566	-0.28662	45.821	4.9306	41.653	-0.050781	-0.084473	0.104	66.353	24.4008	1575.347	-2.4585	1.0278	-0.27588
2.372	61.631	-34.356	1304.3686	-2.1909	0.76611	-0.28027	91.6041	-38.963	1426.662	-2.3027	0.4248	-0.31152	15.196	22.129	6.5613	-0.029785	-0.10083	0.10132	60.6152	0.6425	1561.347	-2.4173	0.921	-0.26934
2.374	21.752	-39.278	1308.46589	-2.2612	0.81494	-0.3042	56.413	-31.346	1435.7505	-2.4141	0.6626	-0.35156	26.378	-46.588	23.382	-0.01709	-0.11621	0.098633	37.6443	27.9035	1508.351	-2.3829	0.78642	-0.25733
2.376	25.692	-17.9841	1319.2695	-2.2866	0.83057	-0.30908	10.923	-61.152	1480.3521	-2.4646	0.82739	-0.37231	17.974	10.6301	18.1964	-0.0087891	-0.12842	0.099121	21.658	65.994	1456.1912	-2.3786	0.65791	-0.23858
2.378	38.827	6.8816	1318.9556	-2.3159	0.87158	-0.32178	-1.839	-24.7151	1488.909	-2.5073	0.97314	-0.39258	-1.317	-14.4605	52.032	-0.0078125	-0.13867	0.097656	-9.92	121.797	1437.305	-2.4127	0.55703	-0.21982
2.38	21.103	25.244503	1302.437	-2.3182	0.88452	-0.34008	-35.1635	-44.421	1490.2	-2.5542	1.1235	-0.42236	-9.834	41.378	13.84047	-0.01123	-0.14453	0.10645	4.15	173.954	1379.722	-2.4858	0.48779	-0.20947
2.382	13.678	20.2902	1299.574	-2.3062	0.89697	-0.35693	16.507	-57.47	1549.2481	-2.5908	1.1983	-0.45459	2.374	-5.0146	8.48718	-0.017822	-0.146	0.11035	-15.405	158.049	1355.425	-2.6032	0.45586	-0.20869
2.384	10.558	21.4773	1297.7158	-2.2637	0.89844	-0.37207	54.4201	-44.346	1569.1131	-2.6187	1.2427	-0.4834	-38.203	26.6113	4.41547	-0.023926	-0.14697	0.11279	-6.08799999999999	161.339	1302.168	-2.7288	0.46553	-0.21006
2.386	44.844	13.9452	1300.2291	-2.2212	0.89502	-0.38306	13.092	-93.395	1593.405	-2.6582	1.2441	-0.51611	-53.589	-21.35886	31.608	-0.03125	-0.14355	0.12451	-32.6074	146.6957	1285.941	-2.8558	0.51123	-0.21279
2.388	81.132	11.36	1287.1704	-2.1812	0.87939	-0.39844	56.769	-73.512	1607.677	-2.6714	1.229	-0.52881	-55.968	31.4495	21.91553	-0.032715	-0.14063	0.12744	-72.479	158.398	1265.11	-2.957	0.59746	-0.22637
2.39	78.438	16.705	1313.6769	-2.1226	0.84424	-0.41455	51.9513	-41.6724	1585.455	-2.687	1.1685	-0.54834	-50.8127	2.83047	20.571	-0.022949	-0.13281	0.13623	-57.826	172.338	1249.744	-3.0308	0.69971	-0.24561
2.392	100.622	21.344	1331.027	-2.0918	0.81836	-0.42383	77.578	-71.377	1606.963	-2.6863	1.1116	-0.5564	-26.175	45.543	14.7983	-0.016602	-0.1272	0.13648	-85.232	176.99	1239.25	-3.0795	0.80215	-0.26474
2.394	98.8709	16.35	1320.826	-2.0366	0.75928	-0.43115	93.096	-36.902	1588.163	-2.6694	1.0474	-0.56592	-13.245	-5.55734	20.0045	-0.0048828	-0.12305	0.13477	-61.9606	154.412	1224.331	-3.1039	0.88711	-0.28574
2.396	88.999	8.997	1296.764	-1.9995	0.70801	-0.43604	36.504	-41.963	1558.301	-2.627	0.96094	-0.57324	-54.962	18.9398	-6.4871	0.015625	-0.12012	0.13379	-48.863	149.1632	1216.673	-3.109	0.95703	-0.30645
2.398	64.883	3.686402	1288.5006	-1.9644	0.65479	-0.43604	0.860999999999997	-48.59712	1591.0258	-2.5913	0.92334	-0.57861	-41.7385	2.3031	-15.47971	0.032715	-0.11719	0.12891	-19.001	174.28	1207.549	-3.1244	1.0221	-0.34199
2.4	82.083	2.371	1274.641	-1.9258	0.59961	-0.43066	-23.712	38.947	1570.834	-2.5293	0.87012	-0.58594	-23.014	58.388	-13.06526	0.057617	-0.11719	0.12354	-18.094	187.101	1186.401	-3.1465	1.0801	-0.37109
2.402	66.327	2.211	1251.794	-1.9141	0.58203	-0.42773	-43.3713	39.2813	1567.383	-2.4841	0.84497	-0.60083	-6.562	20.726	2.23604	0.076172	-0.11597	0.11597	2.099	220.469	1150.783	-3.1586	1.1246	-0.3834
2.404	26.847	5.881	1248.233	-1.894	0.54932	-0.42334	9.437	62.8351	1571.896	-2.4468	0.83447	-0.60107	-8.141	51.53	19.52528	0.095215	-0.11768	0.10449	16.025	171.008	1101.421	-3.1714	1.1634	-0.37441
2.406	28.294	22.876	1237.915	-1.8767	0.53296	-0.41895	-8.835	77.9766	1533.5282	-2.4102	0.83398	-0.61523	14.002	10.6884	14.19947	0.11377	-0.12305	0.091309	17.11	155.733	1024.399	-3.1772	1.1865	-0.35449
2.408	53.511	38.7684	1232.3159	-1.8652	0.52539	-0.41797	-41.992	11.953	1542.4668	-2.3979	0.83447	-0.61084	-13.61	32.253	-4.5012	0.12012	-0.12158	0.086426	69.556	130.487	955.495	-3.1816	1.2059	-0.3459
2.41	76.929	56.8	1207.3809	-1.8398	0.5293	-0.41211	-11.175	67.947	1511.08736	-2.3784	0.84424	-0.60889	-2.092	26.801	16.3604	0.13477	-0.12988	0.062012	44.273	139.879	910.5643	-3.1753	1.2231	-0.33545
2.412	64.814	76.143	1178.6604	-1.8218	0.52783	-0.41357	-15.775	79.372	1474.976	-2.363	0.84008	-0.6018	24.986	46.104	50.066	0.1355	-0.13281	0.050538	60.0731	197.9378	872.763	-3.1471	1.226	-0.3126
2.414	93.707	85.926	1192.645	-1.7969	0.53125	-0.41113	48.932	65.93	1508.865	-2.3496	0.83691	-0.59766	23.831	35.541	28.9572	0.13965	-0.13184	0.04248	65.5518	218.3686	831.259	-3.1042	1.2267	-0.30205
2.416	86.625	101.2	1186.162	-1.7781	0.52661	-0.40747	51.624	112.801	1507.3949	-2.3242	0.83008	-0.58203	42.665	36.5737	31.769	0.13818	-0.12744	0.030762	54.98	277.512	778.549	-3.0542	1.2267	-0.2958
2.418	79.977	84	1156.112	-1.7617	0.5293	-0.40234	1.525	44.9869	1500.5075	-2.3145	0.81836	-0.57422	72.104	31.24	6.57624	0.13184	-0.12109	0.024902	77.4477	272.263	750.457	-2.9869	1.2166	-0.29141
2.42	48.396	58.634	1151.724	-1.7422	0.52539	-0.39453	38.975	44.502	1493.91771	-2.2769	0.79736	-0.55811	29.456	23.19049	30.523	0.12402	-0.10986	0.013184	83.4483	278.497	724.1754	-2.9102	1.1973	-0.28564
2.422	42.939	34.7824	1129.3287	-1.7339	0.52393	-0.39111	23.912	85.028	1467.0876	-2.251	0.77881	-0.54297	23.954	28.1571	18.906	0.11181	-0.099121	0.01001	117.6786	275.088	691.0864	-2.8298	1.1709	-0.271
2.424	33.494	27.246	1102.942	-1.7085	0.5249	-0.37646	13.966	61.164	1498.4446	-2.228	0.7583	-0.53564	32.845	12.5354	23.937	0.10352	-0.084473	0.0078125	74.6415	274.27	638.2576	-2.7496	1.1273	-0.25351
2.426	17.148	30.369	1065.502	-1.6934	0.52344	-0.37061	66.8482	129.356	1460.868	-2.1987	0.73486	-0.52295	24.163	36.945	-2.363	0.087402	-0.062012	0.0058594	99.447	256.003	589.7453	-2.6648	1.0793	-0.23867
2.428	4.979	29.995	1050.3208	-1.6714	0.51904	-0.36328	20.004	114.794	1394.206	-2.1812	0.72852	-0.5249	33.192	14.7955	26.12593	0.080566	-0.050781	0.0039063	73.402	204.5801	554.2629	-2.5762	1.0254	-0.21817
2.43	14.327	45.7076	1039.597	-1.6445	0.51953	-0.35938	10.22	67.622	1365.781	-2.1343	0.72119	-0.50928	17.86	28.7707	45.425	0.069824	-0.030273	-0.00048828	56.271	182.141	493.77	-2.4819	0.97119	-0.19092
2.432	49.044	49.3871	1035.1	-1.6265	0.51318	-0.35693	24.585	117.5999	1336.846	-2.0971	0.71924	-0.49341	-20.743	18.1413	57.89	0.062988	-0.017334	-0.0048829	51.757	157.787	446.663	-2.3797	0.91855	-0.17304
2.434	43.822	54.0728	990.2816	-1.584	0.50879	-0.3457	12.701	95.832	1302.685	-2.0645	0.70703	-0.48633	-24.44	44.959	30.33041	0.059082	-0.0087891	-0.021484	46.929	211.421	399.759	-2.2733	0.87354	-0.15459
2.436	43.706	65.507	988.5803	-1.5528	0.50489	-0.33764	77.0645	149.888	1292.692	-2.0122	0.6958	-0.47217	-19.99	22.7887	32.969	0.052246	0.0019531	-0.031738	37.726	205.313	378.089	-2.1636	0.82705	-0.14678
2.438	85.231	80.625	993.622	-1.5176	0.50195	-0.3291	83.526	213.375	1241.318	-1.9897	0.68604	-0.46533	-32.879	23.269	48.7891	0.048828	0.0039063	-0.037109	-21.887	216.532	367.5408	-2.0508	0.77617	-0.13389
2.44	84.108	87.491	972.238	-1.4707	0.49414	-0.31934	47.169	160.842	1249.5375	-1.9375	0.6709	-0.44531	-29.678	-60.2075	95.971	0.045898	0.0058594	-0.057617	-6.567	206.647	347.521	-1.9375	0.72852	-0.13379
2.442	52.475	98.968	937.9792	-1.4487	0.48682	-0.31885	82.67014	207.957	1236.8	-1.9021	0.66675	-0.43091	-15.818	-52.3385	91.48875	0.040772	0.0078125	-0.077881	-7.491	162.1879	337.741	-1.8266	0.67647	-0.12988
2.444	19.79	111.429	905.4472	-1.4077	0.47754	-0.30615	41.29193	194.218	1189.541	-1.8628	0.66455	-0.42139	-46.0028	-59.5868	112.869324	0.042969	0.0063477	-0.09375	8.534	171.896	306.652	-1.7206	0.62431	-0.12754
2.446	58.89	115.257	886.8034	-1.3762	0.4663	-0.30176	46.0319	162.061	1189.8407	-1.8027	0.66211	-0.40234	-50.0371	21.938	152.7403	0.033691	0.0019531	-0.11475	-9.296	164.17	296.086	-1.6163	0.5708	-0.12441
2.448	44.844	102.3945	859.4773	-1.3452	0.46045	-0.28857	37.2575	201.835	1159.066	-1.7617	0.66016	-0.39453	-19.729	-24.1623	235.75	0.031738	-0.0019531	-0.12256	-9.173	213.737	246.485	-1.5165	0.51768	-0.11924
2.45	-3.295	93.0152	843.368	-1.3047	0.44043	-0.28418	-54.8318	144.279	1118.599	-1.687	0.64893	-0.37842	-10.571	18.75504	257.0398	0.030762	-0.00097656	-0.14111	-23.716	213.836	211.631	-1.417	0.4668	-0.11279
2.452	27.587	100.78222	825.31421	-1.2944	0.43018	-0.27881	-6.587	159.572	1092.242	-1.6267	0.63794	-0.35547	-0.0259999999999962	-21.5469	325.9966	0.025879	-0.0036621	-0.15283	-33.531	194.348	167.39755	-1.3305	0.41328	-0.10957
2.454	67.053	97.374	824.585	-1.2583	0.41455	-0.27393	-1.23	183.9363	1030.0628	-1.5718	0.62061	-0.34229	34.976	72.09	388.5522	0.021973	-0.0024414	-0.15967	-2.204	149.673	141.2874	-1.2471	0.36729	-0.10381
2.456	23.996	93.812	792.2234	-1.2371	0.40698	-0.27295	-27.013	139.8311	1015.157	-1.4917	0.59033	-0.31738	20.872	57.6098	532.254	0.025879	-0.0029297	-0.17188	-9.467	116.6161	127.0604	-1.1691	0.32432	-0.089746
2.458	2.413	98.4606	779.8433	-1.2168	0.39063	-0.2793	-0.054000000000002	194.598	995.6258	-1.4546	0.57861	-0.30518	-25.144	129.541	649.6168	0.023438	-0.0024414	-0.1792	13.435	98.2367	120.533	-1.0932	0.28437	-0.079394
2.46	68.22	106.287	764.6558	-1.1855	0.37793	-0.26465	-61.967	186.439	943.6178	-1.377	0.55469	-0.28027	10.988	62.3831	749.602	0.032227	-0.003418	-0.18994	2.747	65.672	103.073	-1.0176	0.24561	-0.066895
2.462	64.1988	116.103	752.103	-1.1719	0.37891	-0.25879	-27.4959	190.974	942.31	-1.3213	0.5376	-0.26587	26.197	55.45	809.095	0.032227	-0.0046387	-0.2002	14.864	58.853	86.8831	-0.94756	0.20381	-0.066113
2.464	24.134	129.021	722.9974	-1.1479	0.37451	-0.25684	25.482	250.717	905.516	-1.2656	0.52148	-0.25342	55.1389	-54.3355	928.7574	0.026855	-0.0097656	-0.21582	43.133	15.941	79.8063	-0.87305	0.16973	-0.060742
2.466	9.027	121.798	710.716	-1.1336	0.3728	-0.26294	-8.069	200.537	866.314	-1.1909	0.49414	-0.23389	73.929	-44.187	1027.622	0.010742	-0.013184	-0.24414	48.571	30.816	81.2246	-0.80195	0.13614	-0.058398
2.468	14.987	112.976	707.335	-1.1133	0.37305	-0.25977	10.47	226.362	837.688	-1.1504	0.47852	-0.22852	87.714	-113.668	1078.797	-0.013916	-0.010742	-0.25806	62.8903	26.2563	84.593	-0.73232	0.10693	-0.058496
2.47	-2.739	115.273	689.531	-1.0835	0.37646	-0.25244	-17.175	252.185	750.14	-1.0796	0.45557	-0.20996	80.613	-57.384	1044.488	-0.057129	-0.00048828	-0.2749	59.4168	46.701	77.3293	-0.66406	0.07373	-0.057129
2.472	-1.92899999999999	114.7338	651.4503	-1.0659	0.37598	-0.24414	-81.578	219.49922	733.1862	-1.0329	0.4353	-0.19897	97.831	-129.395	996.57678	-0.15234	0.019043	-0.30029	71.958	49.62	43.1987	-0.59161	0.04502	-0.05625
2.474	-17.257	101.975	636.486	-1.0391	0.37695	-0.22998	-33.2386	258.365	718.376	-0.98633	0.41406	-0.18652	73.529	-152.4931	1009.696	-0.2168	0.034668	-0.31494	34.2595	11.7102	42.3994	-0.52695	0.020898	-0.062305
2.476	-17.848	118.7545	603.0105	-1.0152	0.37646	-0.22681	-35.6609	222.6979	675.0188	-0.93164	0.38818	-0.16992	40.5873	-233.46	1037.973	-0.35547	0.08252	-0.31934	57.4684	8.2142	24.0726	-0.46211	-0.0033203	-0.068945
2.478	-8.518	129.0311	569.3286	-0.98828	0.375	-0.22266	-1.511	166.266	653.332	-0.90674	0.38135	-0.15869	2.179	-170.646	1048.4502	-0.48316	0.12232	-0.31689	44.315	-16.7784	2.925	-0.40078	-0.024805	-0.073828
2.48	-13.785	119.932	548.1347	-0.94336	0.375	-0.21582	10.894	198.8661	591.561	-0.86133	0.36719	-0.14795	-3.841	-179.181	1123.4599	-0.62012	0.16504	-0.30811	39.882	10.805	-32.8307	-0.34375	-0.046387	-0.080566
2.482	2.08600000000001	111.522	543.5755	-0.91992	0.37402	-0.21484	-53.271	148.234	565.9319	-0.82104	0.35815	-0.13843	-55.322	-143.794	1166.439	-0.8335	0.2251	-0.2959	30.4951	13.38738	-33.005	-0.30186	-0.065625	-0.094238
2.484	-6.755	115.163	536.96	-0.87207	0.37207	-0.20605	13.9991	182.562	544.042	-0.78271	0.34521	-0.12646	-95.478	-189.244	1206.257	-0.95508	0.25781	-0.29199	-3.498	42.339	-24.366	-0.25899	-0.081445	-0.099417
2.486	10.322	115.444	497.55586	-0.83887	0.36694	-0.19874	20.1085	195.723	503.99174	-0.72852	0.32813	-0.11621	-94.0607	-182.233	1188.903	-1.1421	0.31787	-0.19727	8.124	51.992	-9.3873	-0.2043	-0.098239	-0.083789
2.488	8.7	111.267	479.3002	-0.80762	0.36084	-0.18945	20.3167	146.3437	496.9256	-0.70117	0.32227	-0.11182	-28.431	-168.763	1172.334	-1.3725	0.38281	-0.18506	0.707999999999998	62.677	23.1054	-0.15586	-0.13154	-0.079981
2.49	-19.02	134.85	480.6284	-0.77686	0.35205	-0.1792	67.992	186.726	458.644	-0.646	0.3042	-0.10059	-10.563	-108.8	1215.803	-1.6602	0.48633	-0.18066	-9.499	63.41053	27.1681	-0.11084	-0.15674	-0.074219
2.492	-1.886	145.389	475.606	-0.7627	0.34668	-0.17334	-12.516	161.1818	430.377	-0.60645	0.28687	-0.093262	-44.006	-80.52	1269.0868	-2.0767	0.6958	-0.15479	-29.2453	33.0435	21.8007	-0.07334	-0.17823	-0.069824
2.494	-2.648	142.271	435.9666	-0.72217	0.3335	-0.16406	-9.841	155.9141	423.928	-0.57031	0.27246	-0.089844	-77.806	-96.13	1285.2208	-2.3047	0.80664	-0.13818	-30.80096	44.3315	27.3809	-0.039356	-0.20137	-0.073242
2.496	-14.122	121.246	424.6167	-0.69921	0.32422	-0.15479	-5.702	195.273	384.813	-0.51953	0.24512	-0.076172	-51.013	-148.424	1293.1852	-2.7515	1.0903	-0.12354	-43.3486	19.2807	23.604	-0.0092773	-0.2166	-0.066992
2.498	-15.872	111.636	412.275	-0.66992	0.30615	-0.14648	-31.9621	142.353	350.692	-0.49707	0.23193	-0.072266	-52.4554	-241.7309	1319.181	-2.9734	1.2991	-0.11694	-45.416	43.567	24.5268	0.016113	-0.23721	-0.061328
2.5	9.235	97.822572	403.212	-0.63086	0.29004	-0.14307	-20.03753224	142.751	317.22215	-0.45605	0.21045	-0.060059	-55.8679	-261.762	1343.1154	-3.0444	1.4653	-0.10303	-37.519	21.8225	25.9312	0.029297	-0.25342	-0.059082
2.502	0.740000000000002	101.7656	380.082	-0.61279	0.28662	-0.13721	-26.8767	143.0063	250.6116	-0.42261	0.18775	-0.055665	-76.744	-263.029	1390.063	-2.8745	1.4771	-0.13965	-60.7364	11.1796	24.8735	0.043457	-0.25361	-0.055176
2.504	-0.917999999999999	99.481	371.947	-0.57373	0.27051	-0.13281	-35.3579	102.642	233.556	-0.39551	0.16797	-0.047363	-102.19838	-213.714	1419.167	-2.6572	1.3281	-0.20605	-43.2362	5.65569	12.54972	0.05039	-0.25957	-0.059668
2.506	17.93	94.605	339.3024	-0.54444	0.25879	-0.12573	-39.5374	147.945	217.141	-0.35596	0.15332	-0.036621	-125.705	-225.608	1423.105	-1.9844	0.99121	-0.33936	-62.4711	-3.566	46.3093	0.046875	-0.258	-0.059668
2.508	25.067	96.612	315.622876	-0.51758	0.25	-0.12207	-62.362	137.427	207.644	-0.3374	0.14111	-0.03125	-87.2948	-223.148	1441.47685	-1.7081	1.1031	-0.49414	-28.6956	26.808	71.676	0.046289	-0.25097	-0.061816
2.51	5.511	106.134	318.5027	-0.48193	0.24121	-0.11768	-11.401	132.188	188.1302	-0.30225	0.12354	-0.021973	4.145	-238.799	1489.4132	-1.7695	1.2949	-0.60205	-24.985	7.0967	84.422	0.044434	-0.24609	-0.054199
2.512	0.376999999999995	110.124	299.21809	-0.45898	0.23535	-0.11279	5.767	152.522	147.5009	-0.27636	0.11011	-0.015381	35.338	-184.008	1497.073	-1.9409	1.3853	-0.5166	3.948	19.0411	56.012	0.042969	-0.24668	-0.052344
2.514	19.194	109.299	313.83	-0.4292	0.22363	-0.10303	-54.076	109.116	150.6136	-0.25342	0.097168	-0.0078125	82.357	-129.299	1504.06	-1.9766	1.3418	-0.49805	0.533000000000001	-13.6867	8.7664	0.038281	-0.24473	-0.048926
2.516	-2.387	113.624	290.735	-0.40406	0.2168	-0.10034	-18.962	123.797	150.8086	-0.22559	0.085449	-0.003418	108.686	-34.525	1474.578	-1.9707	1.1191	-0.59668	1.033	-8.15	0.5975	0.026562	-0.24512	-0.048926
2.518	-12.214	105.043	282.936	-0.38525	0.2085	-0.094727	-34.8369	132.951	117.152	-0.20996	0.078613	0.0014648	143.138	-17.881	1515.604	-1.8491	0.91357	-0.66822	41.755	24.8053	20.5034	0.010937	-0.24414	-0.044531
2.52	-8.355	86.1963	282.319	-0.35645	0.19824	-0.086914	-51.9418	92.92	106.153	-0.18066	0.0625	0.0078125	158.823	-13.062	1512.655	-1.6523	0.71094	-0.7041	37.814	24.295	35.6056	-0.0073242	-0.24268	-0.037109
2.522	-9.822	84.6323	263.216	-0.34521	0.18701	-0.07959	-12.262	102.588	73.447	-0.1587	0.052247	0.016113	173.625	-86.275	1516.6415	-1.4941	0.35791	-0.68945	72.208	27.513	17.193	-0.029883	-0.23867	-0.029102
2.524	-17.116	99.384	246.936	-0.31641	0.16943	-0.070801	-63.648	52.5424	59.449	-0.13672	0.043457	0.023438	147.5121	-73.774	1498.621	-1.4629	0.26416	-0.69922	52.96888	-15.8496	-0.655000000000001	-0.056445	-0.23379	-0.017285
2.526	-6.773	89.445	238.2914	-0.29907	0.1604	-0.064697	-28.02	35.5299	71.153	-0.10596	0.032715	0.029785	99.2329	-82.179	1513.623	-1.5415	0.29395	-0.75244	34.7504	-14.4518	1.259	-0.077148	-0.22559	-0.0098633
2.528	-3.944	68.5621	220.797	-0.28125	0.1499	-0.057129	25.476	85.763	39.996	-0.094238	0.023926	0.030273	80.459	-30.2093	1507.912	-1.6452	0.39429	-0.70581	39.816	-11.4408	11.377	-0.097072	-0.21592	2e-08
2.53	-22.689	69.3585	202.3102	-0.25342	0.13477	-0.049805	-4.483	52.738	46.0895	-0.058594	0.018066	0.039063	109.3946	-30.0097	1508.174	-1.7554	0.49854	-0.66846	42.0968	35.239	23.3386	-0.11084	-0.20361	0.0048828
2.532	11.242	74.354	173.35773	-0.24561	0.12451	-0.047363	17.442	44.2	55.5677	-0.031983	0.0036621	0.03711	101.886	-26.831	1480.332	-1.9297	0.64258	-0.71582	58.4152	29.3818	-4.249	-0.11885	-0.18974	0.011719
2.534	3.002	53.448	191.515	-0.2207	0.1084	-0.043945	4.784	39.045	30.9219	-0.0024414	-0.0087891	0.037598	135.1895	-80.287	1544.537	-2.0195	0.71875	-0.72266	36.4755	3.59022	-5.636	-0.11787	-0.17676	0.012598
2.536	-28.394	66.889	190.6302	-0.20752	0.096436	-0.042237	22.23	12.1996	37.0469	0.037109	-0.038574	0.043457	107.6523	-77.223	1573.753	-2.2026	0.88721	-0.7124	40.3385	-5.0608	-10.1974	-0.11592	-0.16035	0.023145
2.538	-7.72300000000001	74.6354	182.948	-0.18994	0.085449	-0.041504	65.2947	51.187	29.991	0.056152	-0.048828	0.046387	104.7741	-81.517	1609.748	-2.3445	1.0354	-0.69507	-6.887	0.9167	9.9021	-0.10733	-0.15225	0.033399
2.54	-6.388	88.052	170.043	-0.1665	0.072266	-0.038574	38.4283	42.521	33.566	0.081055	-0.072266	0.04834	111.288	-11.182	1613.872	-2.4688	1.1875	-0.68359	13.126	59.0871	18.43236	-0.10352	-0.14307	0.040527
2.542	-6.932	78.615	172.921	-0.15625	0.066406	-0.039551	29.4126	26.631	53.377	0.095458	-0.089356	0.051514	77.4218	-7.939	1575.9699	-2.5776	1.3774	-0.6792	17.956	41.89978	34.54	-0.091894	-0.1418	0.047754
2.544	-24.925	85.937	171.827	-0.13281	0.052246	-0.035645	20.496	48.751	16.8254	0.10596	-0.11035	0.054199	12.803	34.951	1530.716	-2.6016	1.4492	-0.68945	-18.0977	54.7022	14.8802	-0.08584	-0.14189	0.054492
2.546	4.305	82.301	136.9421	-0.11597	0.038086	-0.033447	-18.641	12.99631	22.3126	0.097168	-0.12061	0.04248	-1.909	9.638	1499.4146	-2.5879	1.498	-0.71973	-31.0035	33.5377	-7.2621	-0.074121	-0.14463	0.060742
2.548	-3.48	82.028	116.3891	-0.09668	0.025391	-0.042969	10.361	30.835	31.9613	0.094238	-0.12549	0.044434	-22.282	55.7196	1477.3079	-2.4929	1.4187	-0.75074	-36.8052	38.7628	-1.732	-0.061523	-0.15557	0.067188
2.55	5.538	59.368	119.9403	-0.079102	0.013184	-0.040039	36.2601	26.5223	22.2986	0.11523	-0.13379	0.077637	-46.679	64.2114	1497.9985	-2.3608	1.356	-0.78467	-30.413	47.449	27.405	-0.046875	-0.16553	0.071777
2.552	3.716	46.7505	121.765	-0.07373	0.0058594	-0.038574	11.126	-9.5492	31.5152	0.13208	-0.15918	0.093016	-46.877	103.718	1494.151	-2.291	1.417	-0.81445	-77.61857	43.595	49.534	-0.03711	-0.18145	0.074024
2.554	18.721	35.2693	95.2269	-0.069824	0.003418	-0.062988	23.765	12.9291	14.2708	0.13965	-0.17188	0.11035	-67.60408	83.201	1485.757	-2.3496	1.4668	-0.81445	-47.52262	47.366	43.689	-0.025098	-0.19258	0.072168
2.556	15.831	40.839	98.4429	-0.063232	-0.0036621	-0.054687	-9.009	-8.629	7.35594	0.13574	-0.17529	0.10205	-60.975	91.8259	1450.954	-2.4961	1.5254	-0.7832	-44.9855	14.3929	22.9405	-0.014551	-0.20743	0.072559
2.558	9.359	45.973	101.541	-0.024902	-0.011719	-0.031738	13.909	-11.1294	36.5138	0.13574	-0.17188	0.099121	-66.552	82.214	1411.469	-2.5503	1.5347	-0.75732	-53.2745	14.0503	15.608	-0.005957	-0.22275	0.072851
2.56	-7.109	48.999	109.1623	0.012695	-0.04541	-0.016113	11.374	19.9956	24.9006	0.14453	-0.17041	0.099121	-35.609	116.363	1358.482	-2.5566	1.5137	-0.76172	-36.5589	-2.06365	66.2344	6.1062e-14	-0.2334	0.071289
2.562	7.041	57.365	87.732	0.031738	-0.063965	-0.013672	-16.787	-6.1515	30.02	0.15357	-0.17236	0.10059	2.293	109.483	1355.639	-2.4727	1.4414	-0.79004	-27.312	18.3649	59.417	0.0071289	-0.24336	0.075098
2.564	6.319	62.156	79.6954	0.042969	-0.077148	-0.023438	15.21	25.791	35.311	0.16406	-0.17041	0.10742	56.692	134.906	1361.86791	-2.4023	1.3965	-0.79688	-10.044	11.8859	44.4604	0.010644	-0.24707	0.091699
2.566	8.176	53.482	81.0549	0.055176	-0.084961	-0.02832	-52.1	26.6927	-0.00589999999999957	0.18311	-0.16943	0.11035	23.7	100.819	1376.747	-2.2593	1.2778	-0.78662	-8.711	4.89128	29.1814	0.010254	-0.24746	0.10186
2.568	10.244	38.75257	92.179	0.054199	-0.092285	-0.032715	-40.43229	-4.66052	31.6512	0.18896	-0.16895	0.11133	39.594	96.452	1341.802	-2.1931	1.1858	-0.77172	11.62	-7.1102	13.05895	0.010156	-0.24619	0.11611
2.57	6.522	30.12722	74.781	0.066895	-0.10156	-0.037109	-21.057	15.0144	20.5735	0.19873	-0.15479	0.10205	47.6081	77.174	1323.222	-2.1655	1.1177	-0.75732	3.745	-17.821	38.559	0.012695	-0.24365	0.12256
2.572	-4.034	35.815	59.15784	0.078613	-0.10767	-0.036377	-69.175	-7.6296	5.766	0.20166	-0.14917	0.095703	83.99	116.5033	1279.2474	-2.2109	1.0205	-0.70898	31.586	5.0546	49.835	0.019141	-0.2376	0.1289
2.574	5.331	34.515	65.4574	0.088867	-0.11279	-0.039063	-6.453	1.0457	14.7345	0.21143	-0.14795	0.087402	73.3802	134.264	1241.45	-2.1914	1.0176	-0.69531	37.732	-8.269	27.6573	0.031055	-0.22676	0.13662
2.576	-7.117	39.815	61.7946	0.09375	-0.11475	-0.052734	-8.382	20.1504	-7.228	0.22021	-0.13477	0.070801	98.1298	150.604	1200.593	-2.1636	1.0513	-0.70752	47.9292	6.46417	20.4321	0.045508	-0.21504	0.13584
2.578	2.416	43.344	45.4594	0.095215	-0.11182	-0.057617	-32	0.505199999999999	9.8576	0.22656	-0.13525	0.062012	69.6726	140.261	1184.021	-2.0918	1.065	-0.7002	42.3262	-5.4688	16.8707	0.063183	-0.2044	0.12842
2.58	-11.922	34.288	35.6248	0.10303	-0.11377	-0.065918	18.97	15.2128	11.07151	0.24072	-0.12891	0.04248	78.519	147.816	1126.8687	-2.0151	1.0552	-0.69775	20.508	-2.6309	2.8715	0.086426	-0.19238	0.11768
2.582	-8.882	36.566	35.5372	0.10474	-0.11035	-0.065918	6.138	28.43	3.117	0.24805	-0.12964	0.028809	81.92739	145.182	1089.2594	-1.9292	1.0171	-0.68896	59.7347	22.3197	10.534	0.10654	-0.18486	0.10772
2.584	-12.007	30.78	34.6042	0.10645	-0.10986	-0.069336	-14.272	11.4562	10.559	0.25244	-0.12988	0.010254	108.05	198.729	1030.951	-1.9004	0.99805	-0.68164	50.5856	28.2943	26.9	0.13272	-0.17724	0.09883
2.586	-12.777	40.258	36.9218	0.10596	-0.10791	-0.067871	26.889	30.483	13.7034	0.25635	-0.12695	-0.012695	69.7182	232.282	995.804	-1.8608	0.95361	-0.63721	53.617	1.107	25.298	0.14717	-0.17139	0.089844
2.588	-13.744	36.062	38.6271	0.10596	-0.10645	-0.070801	-9.106	10.6008	2.04333	0.25733	-0.12524	-0.025879	83.943	261.361	985.3112	-1.8467	0.92773	-0.60718	35.6928	-38.318	38.653	0.15703	-0.17295	0.075977
2.59	-22.946	34.697	48.612	0.099609	-0.10107	-0.075684	-0.609000000000002	4.712	20.9235	0.25586	-0.12354	-0.035645	84.2747	267.329	966.645	-1.8413	0.90674	-0.5835	-0.899000000000001	-36.169	68.1327	0.16016	-0.17285	0.064453
2.592	13.041	27.0158	42.125	0.090088	-0.096436	-0.074707	31.3938	18.4045	10.0639	0.24658	-0.1123	-0.053223	49.6063	247.859	921.9659	-1.8145	0.88965	-0.56104	19.529	-29.996	140.031	0.15264	-0.17754	0.060058
2.594	-18.332	34.581	40.408	0.084473	-0.089355	-0.075195	12.454	0.423	16.2229	0.23828	-0.10596	-0.05957	20.131	249.304	896.008	-1.7866	0.87939	-0.54932	28.071	-19.351	206.294	0.13799	-0.18623	0.055371
2.596	-7.04199999999999	45.198	37.9851	0.073242	-0.078125	-0.07373	35.97245	10.4282	26.5387	0.22266	-0.093262	-0.067871	8.995	236.367	830.9018	-1.7026	0.85791	-0.53271	45.848	-29.534	225.5258	0.11533	-0.19209	0.049902
2.598	8.28	35.164	36.3273	0.069336	-0.078613	-0.080078	24.986	36.0935	-12.1468	0.20556	-0.073486	-0.075684	-63.367	261.8077	789.2914	-1.6309	0.83692	-0.52149	-9.528	-31.891	267.1063	0.088379	-0.19228	0.045898
2.6	7.17	28.672	13.21117	0.0625	-0.064941	-0.069824	11.645	35.942	-2.981	0.18555	-0.054688	-0.081055	-95.468	249.9759	772.75	-1.5483	0.81104	-0.50244	-37.8667	-6.79	302.6866	0.060059	-0.18896	0.045898
2.602	3.489	18.5977	11.5252	0.057129	-0.055176	-0.063721	47.91	52.474	1.7734	0.16797	-0.025391	-0.090332	-120.788	250.827	693.2003	-1.4546	0.78174	-0.47314	-72.214	18.5883	412.868	0.025879	-0.17813	0.0375
2.604	-5.059	16.3086	10.3545	0.052246	-0.04834	-0.063965	7.762	38.9433	1.4333	0.1582	-0.0068359	-0.097656	-90.216	216.0494	667.72	-1.4136	0.76318	-0.45361	-38.817	64.893	490.0861	-0.0021486	-0.16035	0.032617
2.606	21.691	19.3173	29.862	0.04834	-0.035645	-0.055176	23.707	22.8197	23.776684	0.14941	0.02002	-0.10596	-107.245	209.8435	608.139	-1.334	0.73438	-0.41406	-52.5891	63.5747	592.8706	-0.025586	-0.14043	0.023242
2.608	11.588	25.956	13.0728	0.042969	-0.031738	-0.058105	2.38	33.175	-2.1590889	0.14404	0.044434	-0.1145	-127.366	188.263	589.624	-1.279	0.71265	-0.3894	-84.714	73.557	698.3173	-0.041504	-0.11914	0.0081054
2.61	-2.695	28.76	38.449	0.045898	-0.022949	-0.053223	-21.062	17.3929	19.1033	0.14355	0.067383	-0.11816	-138.155	245.3	570.945	-1.2305	0.69141	-0.36523	-77.54	54.961	794.236	-0.052734	-0.091797	-0.0073242
2.612	15.671	34.142	44.171	0.047852	-0.016845	-0.053223	37.6122	36.542	40.544	0.13623	0.093262	-0.12158	-103.625	252.889	553.757	-1.1616	0.68018	-0.32471	-88.633	39.522	889.094	-0.053223	-0.069434	-0.020215
2.614	7.885	38.823	30.023	0.05127	-0.014648	-0.052246	-19.77	53.265	19.0697	0.13281	0.10596	-0.12646	-62.4071	278.999	493.295	-1.1211	0.66992	-0.31055	-86.14	6.495	970.041	-0.055859	-0.052637	-0.038965
2.616	34.726	40.496	20.6728	0.058594	-0.012695	-0.054199	-39.309	18.32118	13.5258	0.12842	0.12646	-0.13037	-56.524	214.484	460.5534	-1.0562	0.6333	-0.27295	-49.191	-24.323	1039.181	-0.051172	-0.034668	-0.060058
2.618	0.0300000000000011	31.3371	17.821	0.065918	-0.010254	-0.058594	-5.568	35.973	12.58326	0.125	0.1399	-0.13306	-95.075	221.053	407.09	-0.99512	0.625	-0.25488	26.908	-69.789	1073.809	-0.056348	-0.025879	-0.082226
2.62	-3.053	15.471	29.796	0.078125	-0.0083008	-0.054688	-47.5204	23.8923	14.2065	0.1167	0.15137	-0.13721	-71.717	198.139	410.5602	-0.92969	0.61523	-0.23584	21.351	-137.256	1055.921	-0.054688	-0.017578	-0.10547
2.622	21.131	17.61238	25.4802	0.086914	-0.012451	-0.059815	-7.915	11.5966	53.332	0.1084	0.16455	-0.14063	-59.839	221.028	374.411	-0.85156	0.59766	-0.20361	31.604	-187.6267	1033.573	-0.060938	-0.022754	-0.12529
2.624	-1.327	16.7431	27.8706	0.095703	-0.0043945	-0.061035	4.892	29.352	36.205	0.10254	0.17139	-0.13232	-47.821	167.0998	337.384	-0.81494	0.58252	-0.19189	8.286	-251.204	1022.497	-0.065137	-0.030469	-0.14511
2.626	-23.123	6.176	43.2529	0.10693	-0.0068359	-0.062988	-42.7405	-0.875	17.4139	0.096191	0.18555	-0.13574	-29.015	159.64668	298.026	-0.74609	0.56006	-0.16943	-13.0762	-271.815	1028.91531	-0.074512	-0.040625	-0.15683
2.628	14.251	-1.288	58.258	0.11377	-0.0048828	-0.063477	0.899000000000001	12.0904	27.8738	0.083496	0.19385	-0.13086	6.182	103.344	260.252	-0.69361	0.53736	-0.15087	14.557	-290.297	1061.4223	-0.09043	-0.049512	-0.1668
2.63	9.049	-1.407	59.2	0.12109	-0.0029297	-0.060547	-26.537	25.4418	11.2208	0.075195	0.2041	-0.12451	17.813	118.0046	207.83	-0.64014	0.51318	-0.13232	5.185	-280.496	1082.173	-0.10693	-0.05957	-0.17969
2.632	-23.35	6.243	61.2082	0.1228	0.00097656	-0.06372	-37.2662	8.8775	33.1244	0.061523	0.21533	-0.12305	35.552	89.9442	204.639	-0.57959	0.49072	-0.11279	-7.574	-272.025	1131.826	-0.12822	-0.069824	-0.1875
2.634	-18.084	-9.047	96.6747	0.12158	0.0053711	-0.067383	21.959	39.964	38.541	0.051758	0.21924	-0.11865	53.3473	130.349	175.19324	-0.54932	0.47412	-0.10059	-41.053	-265.126	1161.263	-0.14981	-0.077149	-0.20108
2.636	-13.157	-29.159	130.2321	0.12061	0.018066	-0.076172	-19.384	28.145	24.9733	0.039063	0.23389	-0.11133	65.72	86.151	176.802	-0.48975	0.43799	-0.083008	-25.1808	-223.1372	1181.997	-0.16582	-0.084961	-0.21709
2.638	-22.858	-79.3719	163.0871	0.11865	0.02832	-0.077148	10.87	7.2418	33.5162	0.026611	0.23828	-0.10669	101.32	114.16	124.3919	-0.45215	0.42187	-0.068359	-47.007	-177.362	1195.29	-0.17715	-0.088379	-0.24092
2.64	-58.451	-102.798	232.2428	0.10498	0.041504	-0.081543	18.235	22.7179	30.16518	0.010742	0.25098	-0.104	79.06	71.48224	96.8701	-0.41211	0.39746	-0.058105	-20.6958	-146.512	1233.373	-0.18701	-0.085938	-0.26123
2.642	-56.756	-106.669	306.1796	0.091064	0.05542	-0.088379	-12.287	-1.06061	28.2005	-0.0058594	0.25928	-0.092773	44.562	89.443	87.442	-0.37256	0.3667	-0.043457	-30.7619	-136.945	1266.275	-0.2039	-0.080371	-0.27871
2.644	-74.02	-82.412	345.431	0.069336	0.069336	-0.096191	18.064	6.4554	18.3039	-0.01416	0.2666	-0.089844	30.097	54.6825	97.535	-0.3396	0.33813	-0.032715	-33.283	-154.317	1286.621	-0.23135	-0.073438	-0.28877
2.646	-83.103	-64.463	345.3811	0.03418	0.089844	-0.10938	17.1	7.2774	8.18349	-0.037109	0.28076	-0.077148	-6.147	97.217	44.1976	-0.3125	0.31641	-0.022461	0.9168	-159.85	1312.067	-0.28095	-0.070703	-0.30088
2.648	-84.813	-74.8774	369.413	0.0083008	0.095703	-0.12549	21.096	-8.7723	10.0237	-0.055664	0.28808	-0.073731	4.0892	68.6755	18.8057	-0.2793	0.28467	-0.015625	-29.8094	-174.52	1349.4793	-0.35439	-0.063574	-0.31123
2.65	-65.552	-83.3221	406.033	-0.053223	0.11719	-0.15137	53.0328	5.0719	17.2479	-0.070313	0.30078	-0.062988	35.707	72.961	-26.936	-0.26709	0.27002	-0.0097656	-50.298	-198.347	1386.183	-0.44824	-0.059082	-0.31299
2.652	-23.0707	-72.0656	436.832	-0.1106	0.13745	-0.16675	10.232	0.7637	9.3772	-0.086914	0.31299	-0.060059	-9.91	20.08	-1.48995	-0.25	0.23389	-0.0019531	-85.996	-213.4399	1411.3381	-0.55576	-0.045508	-0.304
2.654	-35.149	-40.6418	436.575	-0.17139	0.15918	-0.1792	31.845	-4.4353	30.2202	-0.10156	0.31445	-0.051758	-49.403	28.417	-10.2687	-0.24097	0.20483	-0.0063476	-120.07	-210.9613	1444.623	-0.68321	-0.035645	-0.28672
2.656	-50.159	-4.129	453.409	-0.26514	0.19482	-0.19189	23.671	7.1779	37.3796	-0.11572	0.33301	-0.046875	-60.6315	4.4967	-21.19334	-0.23389	0.18213	0	-125.896	-199.716	1484.642	-0.82344	-0.030176	-0.26016
2.658	-29.8	17.835	466.768	-0.31152	0.21191	-0.19482	7.098	-30.988	83.7832	-0.12574	0.34595	-0.043946	-35.147	34.083	-2.4459	-0.2207	0.16797	0.012695	-112.446	-199.706	1521.725	-0.97978	-0.016504	-0.23408
2.66	-13.033	45.722	475.245	-0.42432	0.25293	-0.19385	26.455	-60.1533	137.4504	-0.13135	0.354	-0.046875	-74.783	11.3715	23.0396	-0.22021	0.1543	0.018066	-88.541	-183.366	1539.23	-1.1421	1.5543e-13	-0.20068
2.662	15.842	75.8598	477.0638	-0.51343	0.28296	-0.19018	-6.922	-56.5222	149.149	-0.14551	0.36133	-0.062012	-60.488	23.964	27.527	-0.22119	0.14111	0.024414	-69.5745	-170.1083	1552.912	-1.3178	0.020996	-0.17539
2.664	21.502	72.8076	516.4529	-0.60352	0.30859	-0.18164	-18.5371	-71.5755	248.576	-0.15527	0.35742	-0.070313	-65.3564	16.1597	34.703	-0.21802	0.13306	0.019288	-19.787	-136.0144	1570.08	-1.5039	0.063867	-0.1456
2.666	12.948	50.712	533.3307	-0.74365	0.34521	-0.17725	-31.502	-78.136	335.744	-0.18066	0.36426	-0.097656	-83.75291	43.7922	6.83	-0.20557	0.12793	0.022461	-46.4553	-102.731	1597.874	-1.7058	0.12988	-0.1206
2.668	-16.869	42.6252	539.598	-0.81592	0.36963	-0.17334	-118.234	-103.571	440.718	-0.2168	0.36743	-0.11719	-78.365	44.3	22.7115	-0.18945	0.12158	0.032227	29.797	-47.953	1592.285	-1.9215	0.22764	-0.11074
2.67	-28.9684	38.549	564.9733	-0.9624	0.42432	-0.17529	-97.2569	-161.178	497.613	-0.26611	0.36816	-0.14111	-74.8055	33.7738	43.261	-0.17236	0.11377	0.032715	38.4473	-34.554	1580.106	-2.1426	0.34766	-0.10693
2.672	-1.832	15.036	627.3744	-1.0708	0.47754	-0.17627	-92.5893	-143.299	504.89	-0.35449	0.36914	-0.1709	-68.0495	27.6727	23.6461	-0.15723	0.10156	0.039551	52.533	-34.762	1572.304	-2.3297	0.48164	-0.11231
2.674	22.653	-21.545	654.583	-1.1753	0.53369	-0.18311	-157.458	-164.461	552.963	-0.40234	0.3667	-0.17529	-14.575	22.591	26.0245	-0.1377	0.089599	0.042969	36.489	-38.469	1557.514	-2.4504	0.61524	-0.10078
2.676	30.809	-55.478	660.4962	-1.2866	0.61572	-0.16406	-38.796	-124.7488	648.121	-0.53516	0.36914	-0.18359	6.392	28.99	24.3538	-0.12939	0.083984	0.043945	15.816	-70.481	1555.0233	-2.5117	0.73203	-0.097266
2.678	30.1367	-86.772	660.82554	-1.3335	0.65479	-0.15967	-36.586	-47.437	681.867	-0.64892	0.37793	-0.20288	11.466	22.473	35.0332	-0.11328	0.06543	0.054199	24.889	-65.866	1547.007	-2.5233	0.83994	-0.11855
2.68	25.52	-128.04	702.952	-1.4316	0.72754	-0.1499	-23.557	-31.408	705.2066	-0.77246	0.38672	-0.20508	-7.699	38.085	23.0243	-0.10889	0.057617	0.05127	32.955	-55.272	1561.1894	-2.4941	0.92773	-0.15039
2.682	5.6853	-140.299	741.995	-1.4917	0.78613	-0.15503	27.393	13.4309	733.3437	-0.95654	0.39307	-0.20508	30.232	29.154	31.4911	-0.10107	0.037598	0.053711	66.795	-44.585	1568.288	-2.4503	0.99502	-0.21103
2.684	17.089	-143.995	760.033	-1.5562	0.84619	-0.17334	-53.73	-11.047	765.408	-1.063	0.39404	-0.21191	42.918	43.4033	16.107	-0.099855	0.024414	0.053711	69.727	-28.609	1580.164	-2.3906	1.0422	-0.25664
2.686	-1.355	-149.543	782.604	-1.6172	0.91797	-0.18408	-27.225	-18.2935	813.399	-1.2964	0.3999	-0.21875	82.2189	17.7836	46.9	-0.097656	0.012207	0.055664	82.344	-14.707	1540.9356	-2.3504	1.0543	-0.30391
2.688	-2.82100000000001	-165.839	809.877	-1.6367	0.94434	-0.19629	24.991	-10.679	841.662	-1.4841	0.42358	-0.21924	87.8061	19.9618	40.304	-0.094238	-0.0068359	0.058594	68.117	-12.021	1540.906	-2.3139	1.0076	-0.3419
2.69	-19.2999	-144.476	826.342	-1.6636	0.99072	-0.19922	28.081	-44.15	861.449	-1.687	0.45654	-0.21924	69.5213	-14.1099	42.576	-0.092285	-0.012207	0.061035	90.4177	-1.5711	1538.4025	-2.2578	0.89648	-0.36084
2.692	-19.361	-115.3611	831.96	-1.6582	1.003	-0.19482	41.621	-84.449	898.685	-1.959	0.52148	-0.2124	65.67072	-2.6212	18.3921	-0.093262	-0.029785	0.064453	53.0586	23.936	1518.4212	-2.1904	0.73681	-0.35635
2.694	-22.0664	-95.022	889.3627	-1.6348	1	-0.19043	-4.87	-90.958	895.7495	-2.0894	0.56104	-0.2124	43.649	-17.8134	30.084	-0.089844	-0.035888	0.068848	48.71723	31.2627	1482.193	-2.1237	0.5585	-0.33887
2.696	-45.575069	-91.461	943.3758	-1.5957	0.96094	-0.18359	28.334	-119.373	901.736	-2.3125	0.65527	-0.21191	45.623	3.6579	38.963	-0.083984	-0.044922	0.07373	52.1125	50.0608	1446.3589	-2.0608	0.38271	-0.32793
2.698	-73.086	-78.184	953.902	-1.5723	0.92969	-0.17773	100.6701	-126.344	929.058	-2.4334	0.74243	-0.22022	58.5756	-9.7162	29.0345	-0.07666	-0.05127	0.078613	-16.687	57.966	1432.7543	-2.0313	0.23056	-0.31416
2.7	-73.846	-62.187	930.7146	-1.5371	0.86035	-0.17676	108.631	-144.819	973.377	-2.5078	0.83789	-0.23096	46.246	15.6042	6.0114	-0.072266	-0.052246	0.087891	-21.473	104.824	1425.492	-2.0469	0.12207	-0.28516
2.702	-55.419	-71.348	975.3605	-1.5136	0.80469	-0.17529	142.92	-213.452	1055.816	-2.5215	0.96191	-0.22363	11.768	4.248	0.7306	-0.055176	-0.062988	0.099121	-41.574	143.624	1395.566	-2.1166	0.066016	-0.24863
2.704	-47.6945	-62.323	1021.1638	-1.5039	0.75195	-0.17236	148.709	-224.999	1076.044	-2.4941	1.0176	-0.21875	-7.847	21.9774	-21.4171	-0.039306	-0.068848	0.10523	-26.429	185.127	1351.1732	-2.2229	0.062207	-0.21426
2.706	-27.621	-73.787	1068.0028	-1.5039	0.69336	-0.17285	70.0361	-263.545	1123.395	-2.3711	1.1172	-0.24414	-19.876	4.7693	13.5503	-0.015137	-0.07373	0.11426	-73.404	188.523	1334.45	-2.3569	0.10948	-0.19199
2.708	-35.285	-87.801	1070.205	-1.5098	0.66504	-0.17969	97.278	-280.685	1181.577	-2.2361	1.1585	-0.26343	-27.981	30.736	-15.4614	0.023926	-0.092285	0.12354	-90.235	166.957	1298.963	-2.4953	0.21064	-0.1832
2.71	-48.2153	-119.6389	1112.9121	-1.5293	0.62305	-0.18652	69.744	-250.119	1226.054	-2.0879	1.1641	-0.29004	-33.6004	11.6454	9.0419	0.046387	-0.10156	0.12451	-64.9822	169.405	1272.453	-2.6245	0.34521	-0.18164
2.712	-51.863	-134.2941	1170.914	-1.5493	0.60791	-0.19189	18.701	-259.756	1274.276	-1.9023	1.0938	-0.31104	-33.623	46.482	5.4333	0.10205	-0.12695	0.12158	-70.1233	164.03	1227.795	-2.7358	0.48799	-0.20596
2.714	-13.526	-139.4948	1211.982	-1.5776	0.59814	-0.19531	84.538	-242.684	1305.305	-1.8237	1.0298	-0.31006	-60.547	24.292	14.5829	0.14672	-0.14941	0.11524	-49.39177	178.495	1215.8367	-2.8281	0.63066	-0.23408
2.716	7.484	-124.8123	1233.323	-1.627	0.60156	-0.2002	29.2016	-190.1184	1282.2759	-1.7158	0.86523	-0.29004	-79.0515	57.061	1.8843	0.18799	-0.17578	0.10107	-77.685	167.913	1199.317	-2.8793	0.74824	-0.26572
2.718	24.213	-119.3715	1265.608	-1.6563	0.60938	-0.19824	38.359	-190.3533	1330.669	-1.6809	0.73316	-0.26831	-94.597	38.938	11.91299	0.24756	-0.20947	0.07959	-70.247	183.06	1171.239	-2.8876	0.83467	-0.30674
2.72	14.711	-101.3601	1287.619	-1.7266	0.63379	-0.21045	38.201	-141.264	1335.1415	-1.6787	0.61328	-0.25244	-78.0953	47.2007	-21.1555	0.27246	-0.22314	0.066406	-33.9078	194.977	1156.651	-2.873	0.88379	-0.36523
2.722	17.344	-79.6658	1288.791	-1.782	0.65552	-0.21704	2.725	-109.472	1343.2121	-1.7261	0.48779	-0.24365	-64.1953	25.8533	16.9345	0.32471	-0.24951	0.048828	-18.6501	197.7712	1135.181	-2.8426	0.91172	-0.44297
2.724	16.444	-55.457	1311.284	-1.8477	0.68555	-0.23242	35.798	-119.52	1368.7307	-1.7734	0.43945	-0.24316	-28.225	36.5087	13.0549	0.35913	-0.26294	0.029542	-24.1832	199.264	1117.789	-2.7901	0.92041	-0.51201
2.726	50.5983	-31.031	1325.0129	-1.9468	0.73486	-0.24512	6.331	-71.916	1346.5565	-1.8843	0.38721	-0.24561	-51.5798	10.5002	13.0626	0.38525	-0.27539	0.015625	-26.4866	179.126	1067.074	-2.7233	0.90987	-0.55967
2.728	42.9876	-17.955	1342.192	-1.9976	0.7583	-0.24951	-36.664	-85.457	1402.4275	-1.9859	0.38818	-0.25024	-35.019	26.6424	28.8209	0.41602	-0.27734	-0.00048828	-4.263	190.561	1013.013	-2.639	0.88447	-0.58271
2.73	27.614	-7.918	1327.728	-2.1069	0.81494	-0.26123	-15.886	-101.6572	1464.7333	-2.0991	0.43262	-0.26514	-33.7821	9.6536	44.2669	0.42969	-0.27832	-0.0043945	-6.5051	175.028	971.149	-2.5522	0.83643	-0.60205
2.732	19.265	-8.6784	1320.428	-2.1777	0.8584	-0.27344	-53.9055	-63.139	1463.865	-2.25	0.56152	-0.29248	-1.102	38.3825	31.1621	0.43555	-0.26758	-0.01709	30.927	198.229	902.264	-2.4734	0.77851	-0.62109
2.734	26.848	3.4069	1338.5725	-2.2402	0.9082	-0.28027	-55.7295	-113.6684	1484.705	-2.3218	0.63916	-0.3042	36.1503	27.8945	47.75	0.43921	-0.25366	-0.028565	25.2999	211.2105	856.5822	-2.3961	0.71797	-0.63321
2.736	24.5529	21.8681	1345.5497	-2.3101	0.96533	-0.29883	-48.281	-103.8818	1487.7772	-2.4565	0.81299	-0.31885	55.469	52.93	24.315	0.43164	-0.24023	-0.028809	44.659	218.5147	804.57	-2.318	0.64922	-0.64336
2.738	7.61	35.1126	1345.0847	-2.3354	0.99658	-0.30859	-66.3628	-99.0832	1502.761	-2.5466	0.93286	-0.32349	41.215	39.4257	41.574	0.4165	-0.20996	-0.030273	45.9446	234.6648	744.225	-2.2404	0.58808	-0.64609
2.74	-2.395	16.1112	1348.2967	-2.3745	1.0532	-0.32666	-8.34	-147.409	1535.905	-2.6191	1.0488	-0.33398	61.759	47.2564	32.08415	0.40527	-0.19092	-0.03418	15.5247	242.5492	724.0546	-2.168	0.5376	-0.65137
2.742	-15.787	3.808	1361.963	-2.3845	1.0832	-0.33057	10.786	-95.6887	1530.437	-2.6675	1.1724	-0.3335	52.73036	10.4165	33.7518	0.37012	-0.15625	-0.030762	42.42	270.537	681.4109	-2.0976	0.49483	-0.65849
2.744	-24.1153	-2.114	1378.792	-2.3882	1.106	-0.32764	-8.0866	-109.2887	1532.7794	-2.6816	1.2217	-0.33936	47.163	13.347	25.2729	0.34057	-0.12573	-0.030029	28.85264	269.789	636.9895	-2.0367	0.46387	-0.6625
2.746	-9.332	-6.544	1382.1735	-2.3926	1.125	-0.33252	40.8376	-140.169	1552.894	-2.7144	1.3071	-0.36279	50.9968	4.268	33.958	0.3125	-0.094238	-0.027832	17.4793	267.496	575.862	-1.9762	0.44004	-0.66368
2.748	-20.578	-14.6211	1404.86	-2.3959	1.1333	-0.32422	20.024	-64.577	1529.9332	-2.737	1.3586	-0.38257	77.2516	18.12486	31.4818	0.27051	-0.057617	-0.01709	-29.257	237.5999	552.267	-1.9226	0.42432	-0.65859
2.75	-36.52348	-14.64813	1417.191	-2.3945	1.1328	-0.31836	36.652	-83.9354	1518.0238	-2.7456	1.4028	-0.38721	57.75127	12.5812	32.5749	0.25	-0.037598	-0.01123	-40.853	238.975	501.2527	-1.873	0.41357	-0.65234
2.752	-66.496	-11.9791	1379.16	-2.3848	1.123	-0.31055	42.334	-25.215	1525.5055	-2.7456	1.4165	-0.37842	45.373	23.064	30.438	0.21826	-0.00097656	-0.0078125	-57.319	232.609	463.5932	-1.8228	0.40869	-0.64277
2.754	-75.937	-4.57307	1366.321	-2.3843	1.1216	-0.30615	4.392	28.6887	1480.745	-2.7461	1.4141	-0.37207	1.067	0.430000000000001	7.44062	0.19018	0.023193	-0.0043946	-49.134	240.011	417.0805	-1.7741	0.40108	-0.6292
2.756	-60.953	-7.72987	1367.907	-2.3652	1.1016	-0.2876	49.822	-12.707	1489.572	-2.7339	1.3931	-0.354	17.633	1.916	2.0567	0.16406	0.046387	-0.0014648	-57.634	240.62	382.051	-1.7245	0.39756	-0.60967
2.758	-76.405	13.307	1372.2813	-2.3555	1.083	-0.27465	52.9471	56.544	1457.474	-2.7205	1.3694	-0.34766	-2.727	-1.7368	0.31184	0.1333	0.075195	-0.0019531	-93.612	222.387	370.9608	-1.679	0.38838	-0.58525
2.76	-67.4	37.022	1360.098	-2.3496	1.0693	-0.26074	19.2091	71.667	1461.498	-2.7065	1.3403	-0.3374	10.149	8.7508	36.1377	0.11816	0.085938	0.0019531	-76.134	211.653	331.2683	-1.6382	0.3833	-0.56396
2.762	-91.921	50.643	1320.97964	-2.3398	1.0527	-0.25293	81.5937	43.5109	1500.754	-2.689	1.3052	-0.31982	-25.185	3.3274	25.49017	0.091797	0.11182	-0.0073242	-129.19	182.558	316.828	-1.6058	0.37324	-0.5332
2.764	-81.285	63.764	1317.4274	-2.3335	1.0435	-0.24658	52.8751	100.027	1466.8336	-2.6792	1.2837	-0.31104	-42.283	5.197	34.045	0.075195	0.12915	-0.0078125	-107.814	187.49	302.052	-1.5761	0.36553	-0.50264
2.766	-62.766	78.881	1334.929	-2.314	1.0308	-0.23682	30.399	36.0579	1463.4691	-2.6621	1.2549	-0.29492	-66.8287	3.9878	8.1983	0.054688	0.14307	-0.0073242	-99.1	184.365	290.735	-1.5433	0.36045	-0.47061
2.768	-35.1288	76.072	1306.204	-2.3023	1.021	-0.22852	30.983	20.774	1466.3596	-2.6494	1.2285	-0.28808	-66.0715	3.684	-12.46	0.030762	0.16748	-0.0058594	-90.143	190.143	250.982	-1.5115	0.35439	-0.43945
2.77	-47.7232	75.491	1297.861	-2.2891	1.0117	-0.21875	-7.1159	26.944	1440.4163	-2.6265	1.2075	-0.28076	-76.644	22.8748	2.25	0.021973	0.17676	-0.0043945	-116.31	197.735	205.9718	-1.4761	0.35693	-0.40576
2.772	-44.3659	62.149	1302.754	-2.2593	0.99658	-0.2124	23.379	-40.4142	1469.5491	-2.5913	1.1792	-0.271	-38.16	30.897	8.28	-0.0019531	0.19922	0.0058594	-112.508	182.6896	175.523	-1.4409	0.35938	-0.37285
2.774	-29.276	64.9594	1299.683	-2.2422	0.98438	-0.20801	25.631	35.261	1452.1489	-2.5698	1.1587	-0.26514	-57.6259	43.761	-31.7802	-0.017823	0.2085	0.011474	-78.19	184.967	172.511	-1.4007	0.37471	-0.3415
2.776	-16.778	60.131	1279.43	-2.2109	0.96484	-0.20166	-40.5615	38.7343	1430.7422	-2.519	1.1177	-0.2627	-51.7967	27.0968	2.0786	-0.033691	0.22461	0.019043	-80.853	153.42095	162.281	-1.3581	0.38838	-0.31143
2.778	3.11	46.2259	1257.91519	-2.1822	0.9458	-0.19361	-18.121	22.351	1445.394	-2.4805	1.083	-0.25024	-61.514	28.1139	-8.9396	-0.049316	0.22852	0.028809	-24.45	141.089	157.118	-1.3168	0.40371	-0.28076
2.78	-0.795000000000002	34.3591	1250.0172	-2.1563	0.92773	-0.18945	-48.3689	101.917	1393.367	-2.4312	1.0454	-0.23877	-51.376	18.6601	12.1558	-0.054199	0.23535	0.031738	-26.2191	102.721	132.561	-1.271	0.4165	-0.25342
2.782	8.9222	38.8871	1227.8008	-2.1104	0.90039	-0.18555	-61.698	43.3595	1394.889	-2.3652	0.99609	-0.21973	-23.01	35.01	22.7464	-0.0625	0.2417	0.034668	-13.3559	70.118	85.034	-1.2269	0.4294	-0.22568
2.784	-6.852	29.89	1203.2171	-2.0894	0.89111	-0.18311	-23.8548	69.4755	1381.751	-2.332	0.97852	-0.21973	-4.577	34.4335	56.916	-0.071289	0.23974	0.049804	30.272	45.57	78.41	-1.1812	0.43301	-0.19922
2.786	1.53	35.4442	1194.551	-2.0347	0.85986	-0.17529	-64.634	107.18	1337.534	-2.2651	0.93799	-0.20557	2.689	35.7376	99.732	-0.075684	0.23975	0.054688	41.334	43.4526	48.0303	-1.1344	0.43457	-0.17265
2.788	25.1845	36.5073	1199.282	-1.9946	0.83837	-0.16552	-43.7344	68.758	1309.606	-2.2031	0.91114	-0.19922	18.6079	-19.428	176.2335	-0.081055	0.2417	0.0625	74.321	38.599	41.871	-1.0839	0.43369	-0.14307
2.79	35.986	65.6105	1181.175	-1.9546	0.81006	-0.16162	-23.337	145.58	1270.882	-2.146	0.88916	-0.18994	17.991	-19.579	187.546	-0.088867	0.23975	0.065918	55.711	3.741	37.481	-1.0317	0.42627	-0.11963
2.792	14.04	91.666	1143.5605	-1.8984	0.7666	-0.15283	-38.479	138.639	1234.2301	-2.062	0.85107	-0.1748	-3.923	-9.668	283.33	-0.095215	0.24219	0.070313	73.227	8.0529	38.87328	-0.97793	0.41719	-0.093651
2.794	-12.101	103.574	1116.8167	-1.875	0.75	-0.15137	8.05	102.2695	1245.9505	-2.0117	0.82324	-0.16992	-21.6009	-15.589	364.513	-0.098145	0.23853	0.075927	40.7951	-11.763	54.627	-0.9211	0.40664	-0.070801
2.796	-4.273	123.73	1109.4625	-1.8164	0.71875	-0.14404	-13.405	164.611	1211.767	-1.9565	0.79736	-0.16406	1.123	-68.8221	506.9382	-0.096191	0.24023	0.078613	76.215	10.3698	45.489	-0.8711	0.39688	-0.050489
2.798	-20.2928	125.837	1088.9755	-1.7723	0.69263	-0.13867	-19.0224	106.0512	1210.177	-1.8848	0.76758	-0.15625	-30.427	-80.388	580.255	-0.095215	0.24072	0.082031	59.6361	21.6177	26.476	-0.81738	0.38555	-0.032617
2.8	-33.6206	115.352	1058.0378	-1.7266	0.67969	-0.1416	7.892	128.867	1204.157	-1.8438	0.75391	-0.15479	-70.472	-118.4185	653.4998	-0.088867	0.24365	0.074219	43.6582	18.8316	-9.117	-0.76953	0.37305	-0.01123
2.802	-48.2712	90.4402	1045.162	-1.6694	0.6582	-0.14453	-11.526	158.777	1154.978	-1.7632	0.729	-0.15479	-72.7999	-103.368	667.9371	-0.078125	0.23438	0.069824	53.5568	13.01154	-10.6413	-0.72373	0.36543	0.0017578
2.804	-58.0684	87.5023	1018.214	-1.6426	0.65137	-0.14404	26.434	73.709	1129.911	-1.6941	0.70678	-0.15625	-83.087	-91.825	732.202	-0.065186	0.23682	0.0625	10.685	-1.1599	-29.279	-0.68321	0.35703	0.015039
2.806	-54.9442	97.681	989.0496	-1.5894	0.6333	-0.14111	41.508	123.0806	1091.0369	-1.627	0.6875	-0.15576	-42.8852	-53.308	755.363	-0.050781	0.22998	0.050781	31.389	22.3249	-6.98758	-0.6457	0.35274	0.028711
2.808	-69.476	100.659	968.8505	-1.5484	0.61963	-0.14063	13.223	95.5508	1066.7357	-1.5366	0.66162	-0.15771	22.072	-64.329	820.197	-0.030273	0.22119	0.025391	1.454	30.0369	-1.34	-0.60732	0.3501	0.038965
2.81	-57.0821	99.714	946.7901	-1.5171	0.60791	-0.13818	68.225	62.914	1052.1269	-1.4937	0.64307	-0.15771	61.629	-48.1193	839.49234	-0.02832	0.21387	0.01709	16.988	38.31	9.891	-0.57227	0.34961	0.049316
2.812	-71.171	116.208	935.3879	-1.4741	0.58643	-0.13184	57.2031	154.606	1017.4934	-1.4116	0.60596	-0.15527	-28.582	-77.162	912.23	-0.029785	0.20166	-0.039063	-44.27671	37.7828	6.5081	-0.54091	0.33691	0.060449
2.814	-46.34341	116.853	912.5853	-1.4512	0.5752	-0.12988	54.4389	111.943	988.7384	-1.3528	0.573	-0.14819	-56.499	-79.8711	920.012	-0.05249	0.19189	-0.089845	-52.0972	44.5392	5.501	-0.51269	0.32978	0.065234
2.816	-64.84	104.3107	907.866	-1.4097	0.55518	-0.12305	100.7329	148.3114	955.353	-1.2993	0.53857	-0.14063	-48.3515	-134.919	956.862	-0.087402	0.19043	-0.14844	-60.2772	67.092	30.292	-0.48653	0.32041	0.069531
2.818	-52.736136	111.134	885.424	-1.3745	0.54052	-0.12182	56.315	191.987	896.5868	-1.2358	0.49951	-0.12744	-4.933	-161.497	960.403	-0.16846	0.20801	-0.20557	-65.111	56.999	28.3943	-0.47392	0.30889	0.077051
2.82	-42.0764	116.416	866.57	-1.3433	0.52783	-0.11963	54.1504	140.7035	870.84261	-1.2051	0.47607	-0.12158	-16.614	-182.188	995.586	-0.22021	0.21582	-0.23633	-50.1651	49.749	37.8532	-0.46143	0.29639	0.081055
2.822	-33.105	129.726	834.507	-1.2905	0.50635	-0.1167	38.336	201.778	827.5587	-1.1396	0.42969	-0.10449	17.258	-171.74	997.409	-0.34863	0.23438	-0.28418	-80.436	14.86065	22.508	-0.45459	0.28428	0.087793
2.824	-56.3957	127.566	815.722	-1.2603	0.50439	-0.11475	18.573	182.696	808.227	-1.0879	0.4004	-0.09448	-45.558	-191.007	1010.928	-0.49756	0.26123	-0.33936	-76.25678	17.7157	18.1555	-0.45508	0.26797	0.09209
2.826	-34.2994	131.229	793.915	-1.2007	0.48779	-0.12158	36.282	145.071	783.1767	-1.0386	0.37256	-0.088867	-27.092	-163.742	1011.789	-0.57715	0.27881	-0.35547	-82.877	9.1172	35.566	-0.46211	0.25781	0.09834
2.828	5.924	142.767	745.832	-1.1553	0.47364	-0.1228	-5.364	214.158	718.289	-0.96777	0.33252	-0.077148	-14.974	-220.1636	1054.579	-0.73926	0.32813	-0.37598	-4.339	13.25582	53.334	-0.46582	0.24687	0.1085
2.83	9.245	140.7174	717.299	-1.106	0.46094	-0.12256	-6.197	173.0332	695.305	-0.93359	0.31738	-0.070801	55.818	-210.1646	1133.095	-0.84082	0.36036	-0.3413	-19.167	19.7043	64.677	-0.4751	0.23828	0.1167
2.832	10.469	140.608	700.6247	-1.0508	0.4375	-0.11816	26.122	191.946	662.165	-0.87451	0.28857	-0.063965	80.6267	-271.534	1209.907	-0.9624	0.39307	-0.31299	-9.137	2.4515	65.071	-0.48867	0.23457	0.12393
2.834	13.134	133.6	677.8282	-1.021	0.42627	-0.11816	-17.939	217.175	637.3147	-0.82495	0.26929	-0.052246	87.066	-278.572	1252.885	-1.2344	0.49805	-0.31689	8.213	-0.0475000000000003	51.732	-0.4956	0.2335	0.13623
2.836	36.749	131.166	650.1434	-0.96582	0.40723	-0.11621	-11.992	157.253	622.2008	-0.77734	0.24609	-0.041016	34.208	-316.327	1258.401	-1.3711	0.56348	-0.31787	-16.257	-13.7109	26.13239	-0.49365	0.2335	0.14482
2.838	46.2836	127.07	631.6332	-0.92578	0.39014	-0.10962	-14.435	198.039	568.5034	-0.7124	0.21631	-0.033203	39.164	-262.0299	1262.2451	-1.6387	0.68848	-0.28564	51.0932	11.3087	32.6023	-0.48389	0.23506	0.14736
2.84	29.345	120.505	620.9275	-0.88965	0.37646	-0.11133	-18.209	162.472	558.6388	-0.68164	0.20264	-0.029785	30.358	-254.1281	1318.0209	-1.8386	0.79224	-0.25855	50.17754	9.754	21.705	-0.46631	0.23389	0.14844
2.842	42.6802	129.012	611.553	-0.83496	0.35547	-0.10938	3.676	113.1776	551.352	-0.62451	0.17041	-0.015625	83.43	-177.88	1360.801	-2.0405	0.90674	-0.24072	59.87653	15.1496	14.154	-0.4332	0.23515	0.14736
2.844	30.998	151.857	569.3133	-0.80615	0.34326	-0.11084	-28.058	183.969	498.8307	-0.5791	0.14526	-0.01001	51.7288	-202.787	1369.673	-2.2754	1.0488	-0.22314	59.776	0.556000000000001	16.5385	-0.39824	0.23135	0.14532
2.846	30.743	147.829	535.7359	-0.75244	0.31787	-0.10938	-35.232	151.278	479.105	-0.53711	0.12451	-0.0048828	84.554	-137.6661	1409.4203	-2.3633	1.1172	-0.21289	51.7428	-4.808	6.0091	-0.35957	0.22275	0.13984
2.848	12.135	130.5764	541.919	-0.71411	0.30152	-0.10571	3.811	175.67	458.5228	-0.48438	0.094727	0.00048828	64.523906	-155.708	1412.5925	-2.4512	1.2363	-0.18408	49.8539	14.3545	37.6806	-0.31524	0.20899	0.13467
2.85	13.442	129.044	518.0983	-0.67383	0.28906	-0.1084	-25.3847	200.002	431.447	-0.45654	0.083008	-0.00048828	79.5991	-80.773	1449.4488	-2.449	1.2971	-0.17529	63.136	16.58	35.24	-0.2793	0.19043	0.13184
2.852	13.242	129.08	487.8957	-0.62695	0.26807	-0.10693	-1.458	125.7812	411.4	-0.40576	0.062012	0.0097656	40.335	-83.756	1462.5224	-2.4082	1.3359	-0.18213	85.013	27.87	14.08	-0.2417	0.17012	0.12617
2.854	2.944	113.489	466.063	-0.60547	0.25391	-0.10547	22.996	177.072	365.85	-0.37085	0.041748	0.008789	14.944	-54.652	1484.2482	-2.2827	1.3267	-0.21436	36.2635	10.7655	-12.4183	-0.21543	0.14687	0.12597
2.856	-9.606	91.1338	465.972	-0.5542	0.23535	-0.10205	28.091	164.11	332.2924	-0.33496	0.024902	0.0087891	-26.9185	-98.156	1488.6761	-2.1855	1.2734	-0.23389	51.989	11.2303	-20.9393	-0.19551	0.12266	0.1166
2.858	-27.452	101.0448	443.648	-0.52491	0.21851	-0.094483	45.576	136.118	319.279	-0.29248	-0.00097656	0.0083008	-15.1955	-69.227	1521.6456	-1.8691	1.0645	-0.2959	17.492	-7.7124	-8.9897	-0.18291	0.10489	0.11026
2.86	-8.065	119.895	396.8845	-0.4917	0.20264	-0.092285	24.212	183.427	295.012	-0.271	-0.018066	0.010254	-24.8393	-82.207	1551.147	-1.6782	1.0141	-0.34082	25.117	7.305	3.44	-0.16357	0.082031	0.125
2.862	-33.587	130.918	359.6836	-0.45801	0.18115	-0.084473	40.002	127.987	276.0205	-0.2251	-0.041992	0.016113	-43.9336	-49.214	1599.357	-1.687	1.0649	-0.37549	10.1519	31.5582	16.877	-0.12851	0.049902	0.13418
2.864	-32.347	133.275	352.1747	-0.43555	0.17334	-0.080566	86.359	145.916	253.34937	-0.19263	-0.061035	0.01709	-92.113	-85.427	1602.0508	-1.9883	1.1426	-0.36572	4.801	32.77127	3.49013	-0.088379	0.01211	0.15283
2.866	-52.4393	122.001	345.753	-0.40186	0.15234	-0.07666	47.1601	162.188	247.4339	-0.1626	-0.076172	0.015137	-94.141	-84.111	1583.916	-2.1108	1.1606	-0.3374	-52.711	43.5428	19.637	-0.059082	-0.026953	0.1669
2.868	-51.263	118.225	329.674	-0.37598	0.13623	-0.074218	42.0493	104.8488	243.895	-0.12695	-0.10449	0.013184	-70.1511	-111.1967	1592.326	-2.2358	1.1665	-0.32861	-70.4548	39.319	17.804	-0.038086	-0.05625	0.16357
2.87	-41.057	109.717	314.7966	-0.354	0.12256	-0.075195	47.7532	149.705	214.044	-0.10938	-0.11377	0.011719	-50.499	-96.0457	1632.513	-2.237	1.1291	-0.38672	-35.636	55.155	44.661	-0.018066	-0.077637	0.16748
2.872	-17.197	105.574	314.505	-0.31396	0.097168	-0.073242	35.128	108.3304	192.4559	-0.080078	-0.14258	0.0097656	-51.574	-93.3566	1641.241	-2.2031	1.042	-0.44141	-64.7049	57.852	30.2499	0.0096681	-0.097556	0.17695
2.874	-19.45	101.606	298.788	-0.29248	0.089355	-0.069824	47.064	71.408	179.4301	-0.058838	-0.16016	0.0078125	-79.608	-78.4535	1638.381	-2.1831	0.98486	-0.47998	-57.7295	32.8214	34.7886	0.039746	-0.11757	0.18525
2.876	-34.608	94.931	274.784	-0.2666	0.074707	-0.068848	33.863	112.789	162.311	-0.050293	-0.17383	0.0048828	-100.587	-69.125	1608.4849	-2.1992	1.0176	-0.51172	-80.218	21.0804	3.219	0.069433	-0.13086	0.19073
2.878	-5.03	98.389	270.401	-0.2439	0.061279	-0.067627	33.3637	42.23	171.024	-0.053223	-0.18213	-0.026855	-111.984	-45.3709	1628.565	-2.2598	1.1084	-0.50781	-81.5313	7.0273	13.591	0.10752	-0.1416	0.19942
2.88	1.278	102.561	239.0309	-0.22607	0.054688	-0.070313	28.997	63.97577	141.319	-0.06543	-0.18311	-0.033203	-87.4619	-8.727	1606.5815	-2.313	1.1606	-0.51562	-59.828	25.9394	35.6546	0.14697	-0.15137	0.20068
2.882	15.153	91.425	232.0224	-0.19824	0.048828	-0.065918	-12.981	84.828	128.38	-0.026367	-0.19531	-0.0019531	-58.7719	13.4889	1591.395	-2.3789	1.2109	-0.54492	-18.183	28.3914	48.963	0.1875	-0.15996	0.19814
2.884	18.117	72.0063	224.0265	-0.18701	0.047363	-0.063965	-12.503	21.057	118.0631	0.0043943	-0.21289	0.018311	18.134	52.5478	1573.164	-2.4531	1.2695	-0.5791	-10.6538	37.61	51.624	0.23525	-0.16895	0.19356
2.886	18.483	58.2662	228.876	-0.16357	0.039551	-0.057129	-11.426	84.936	97.5123	0.021973	-0.23389	0.026367	-20.9988	48.9122	1565.712	-2.48	1.3013	-0.56982	-29.92809	5.0344	33.4293	0.27237	-0.18223	0.17832
2.888	27.851	61.0859	209.335	-0.14673	0.039795	-0.055664	-35.027	50.8555	77.2255	0.021484	-0.23193	0.018066	-28.8686	51.851	1544.1258	-2.5391	1.3633	-0.56982	-12.129	11.3901	38.6483	0.29961	-0.1875	0.14609
2.89	41.3675	57.9001	202.503	-0.13135	0.033203	-0.053711	-4.671	27.452	75.88	0.019043	-0.23535	0.0083008	-26.5642	33.406	1548.3019	-2.5757	1.4063	-0.57471	-12.132	-4.219	50.168	0.32617	-0.18555	0.13086
2.892	39.039	55.4004	196.264	-0.11768	0.03125	-0.063477	-48.4541	80.411	27.9746	0.025391	-0.22998	0.0073242	40.922	59.874	1509.72	-2.6016	1.4512	-0.58105	45.672	-3.609	57.5975	0.35918	-0.1917	0.10938
2.894	28.861	61.2298	198.572	-0.11523	0.037598	-0.064941	-44.67	15.8666	48.135	0.028809	-0.22265	0.005127	29.096	53.277	1536.88	-2.6274	1.4966	-0.58496	64.7542	2.793	34.744	0.3916	-0.19873	0.095702
2.896	51.6708	73.775	161.4414	-0.085449	0.034668	-0.046875	-35.118	41.7756	41.078	0.027832	-0.21924	0.0083008	58.5995	103.931	1489.8961	-2.6362	1.5083	-0.58643	53.1262	-24.67541	14.5519	0.41191	-0.20771	0.081249
2.898	34.332	77.293	136.4306	-0.053467	0.018799	-0.035156	-53.9175	40.206	20.5859	0.039063	-0.20898	0.0063477	25.546	88.6618	1472.589	-2.6328	1.5273	-0.58496	25.4859	-8.94489	0.3787	0.42988	-0.21348	0.068652
2.9	26.991	74.938	134.15625	-0.025879	0.0063477	-0.032715	-31.752	8.8764	30.7217	0.042969	-0.19531	0.0063477	45.972	123.178	1443.467	-2.6316	1.5218	-0.58081	64.202	-11.9179	21.9087	0.44092	-0.22168	0.059082
2.902	27.29	65.915	137.7779	0.00097656	-0.01123	-0.025879	-14.355	56.791	9.8732	0.054199	-0.18701	0.0087891	30.2713	74.9722	1469.5213	-2.6226	1.5103	-0.57764	91.902	18.8491	37.271	0.45371	-0.22842	0.045118
2.904	25.258	65.652	113.5394	0.0097656	-0.018066	-0.027832	-35.2355	28.958	12.074	0.059326	-0.1792	0.0029297	38.487	92.7165	1453.257	-2.627	1.5352	-0.5708	71.6052	21.2242	16.349	0.4539	-0.23018	0.039162
2.906	9.238	63.513	95.0268	0.021484	-0.034668	-0.040039	-4.054	9.0678	27.765	0.067871	-0.17432	0.0029297	35.4545	73.092	1461.777	-2.6367	1.5547	-0.56152	74.9045	26.791	-7.317	0.44961	-0.22354	0.028227
2.908	-4.42	46.344	118.917	0.034179	-0.050293	-0.041259	-26.2203	34.1007	-4.5725	0.077637	-0.17285	0.0092773	37.608	152.7305	1407.939	-2.6655	1.5942	-0.5376	37.1759	20.7401	-30.319	0.44268	-0.20781	0.015922
2.91	-3.633	36.6096	108.659	0.044922	-0.058105	-0.037598	16.451	-17.8906	5.4	0.083984	-0.17578	0.01416	22.443	153.95	1399.303	-2.6757	1.6103	-0.5249	26.945	25.9193	-4.254	0.43555	-0.18896	0.00048828
2.912	-25.551	42.477	95.936	0.052734	-0.062988	-0.024414	20.565	0.8334	17.8853	0.083496	-0.18213	0.01709	6.13	210.85	1349.4383	-2.6641	1.6055	-0.51855	51.014	24.146	15.461	0.42656	-0.1578	-0.015141
2.914	-16.52	57.235	70.0833	0.053711	-0.072754	-0.023926	12.294	14.68026	0.582	0.082031	-0.18604	0.02124	-22.641	183.541	1318.212	-2.5898	1.5674	-0.50391	31.599	18.3733	18.195	0.41669	-0.12702	-0.025893
2.916	-28.731	46.029	74.3809	0.058105	-0.08252	-0.024902	57.88913	-1.3323	15.2589	0.083984	-0.19385	0.025391	-17.203	222.479	1283.304	-2.5444	1.5376	-0.50146	-6.645	32.661	12.1628	0.40419	-0.088723	-0.040737
2.918	-30.352	41.977	78.5091	0.063476	-0.09082	-0.023926	27.791	33.6082	0.286	0.077637	-0.20264	0.032715	-28.573	186.209	1291.675	-2.4609	1.4639	-0.48047	-17.4974	19.3396	29.914	0.39071	-0.056026	-0.059188
2.92	-48.9146	31.1331	77.092	0.068848	-0.084473	-0.015137	18.5593	20.6339	16.861	0.074219	-0.20459	0.040527	-44.139	249.931	1242.8184	-2.4043	1.4033	-0.45532	-45.1102	12.876	57.558	0.38232	-0.024414	-0.067871
2.922	-56.4383	31.705	47.25864	0.074707	-0.089355	-0.019531	48.9861	10.3651	21.5859	0.063965	-0.21826	0.046875	-41.9326	226.18	1240.584	-2.3589	1.3481	-0.43506	-61.543	-17.645	94.015	0.36788	0.010305	-0.078797
2.924	-17.923	34.9268	51.7292	0.080078	-0.09253	-0.020019	16.006	46.918	-0.3842	0.058105	-0.22144	0.052002	-47.2906	263.058	1177.884	-2.3101	1.2739	-0.3999	-14.99	-17.24	120.9587	0.34931	0.044713	-0.08777
2.926	-24.668	25.9537	70.603	0.093262	-0.09375	-0.029785	25.224	25.04732	1.0999	0.054199	-0.21826	0.049316	-64.5472	210.2653	1142.749	-2.2949	1.2285	-0.38281	-74.268	-14.046	142.5511	0.32432	0.078285	-0.098674
2.928	-39.453	39.3504	55.558	0.097656	-0.091309	-0.025391	55	43.341	10.54829	0.05127	-0.22168	0.056152	-84.5966	236.753	1110.455	-2.2476	1.1763	-0.36328	-86.224	-36.287	198.652	0.29746	0.10626	-0.10606
2.93	-25.256	27.168	39.1835	0.098145	-0.09375	-0.026855	9.655	55.818	-1.077	0.053711	-0.21875	0.061035	-49.993	214.584	1099.513	-2.197	1.1506	-0.35279	-89.413	-29.771	265.068	0.26318	0.13916	-0.11377
2.932	6.216	35.912	42.7907	0.10352	-0.091309	-0.030762	35.1985	24.218	13.5758	0.04834	-0.21631	0.063965	-41.401	260.38	1079.329	-2.1406	1.1172	-0.34375	-108.248	-43.7718	342.393	0.22345	0.16502	-0.11662
2.934	-3.617	39.924	30.3817	0.10595	-0.096191	-0.033448	10.605	61.634	-8.3449	0.053467	-0.21363	0.067627	-8.256	229.315	1032.569	-2.0527	1.0605	-0.32813	-70.259	-8.711	452.689	0.17842	0.18569	-0.11138
2.936	-15.234	34.128	32.0593	0.10303	-0.09375	-0.034668	-24.4765	33.1312	15.4232	0.05127	-0.20459	0.069336	-18.726	234.659	974.9564	-2.0098	1.0313	-0.32178	-59.294	32.4306	572.284	0.12943	0.20469	-0.10282
2.938	18.574	28.0074	32.884	0.095703	-0.093262	-0.041504	10.149	11.3133	47.589	0.050293	-0.19971	0.066406	-33.163	197.2175	918.2453	-1.9268	0.97852	-0.30273	-93.722	68.531	716.29	0.074597	0.22492	-0.098369
2.94	6.767	26.77	31.686	0.088379	-0.092773	-0.041016	-27.971	47.175	25.954	0.051758	-0.20313	0.070313	-14.98	224.138	882.243	-1.8772	0.93383	-0.2832	-88.338	87.7143	840.3438	0.020996	0.24365	-0.090332
2.942	31.18	33.223	28.5922	0.075195	-0.090332	-0.040039	-26.254	12.8986	33.963	0.052734	-0.20117	0.064941	42.395	209.08741	840.5138	-1.8276	0.89697	-0.26709	-20.698	57.759	954.249	-0.036508	0.25622	-0.073987
2.944	16.666	23.1482	17.4339	0.060059	-0.084717	-0.040772	-16.601	15.1289767	31.5522	0.053222	-0.19995	0.066162	60.247	254.0723	830.157	-1.7617	0.85352	-0.25439	-36.0369	25.6543	1065.235	-0.092058	0.27177	-0.060922
2.946	33.787	19.0573	36.0773	0.044434	-0.078125	-0.039551	-49.2012	24.1358	24.30143	0.05127	-0.20215	0.066895	62.437	246.0591	748.526	-1.7241	0.82861	-0.24316	-17.593	-36.6984	1165.421	-0.14092	0.28651	-0.047172
2.948	40.187	27.9815	30.2443	0.0083008	-0.064941	-0.037598	-28.3389	-9.7062	41.007	0.049316	-0.19727	0.063477	49.0196	259.471	712.652	-1.6406	0.77441	-0.23193	13.9133	-43.5	1244.605	-0.18377	0.30461	-0.030001
2.95	47.5912	26.845	15.86406	-0.0024414	-0.060547	-0.035645	-29.188	30.805	30.4728	0.047363	-0.19824	0.054688	67.5964	235.0237	629.8428	-1.565	0.73828	-0.22485	25.96585	-91.791	1243.223	-0.22314	0.31934	-0.015625
2.952	36.5793	31.76	6.9524	-0.038086	-0.042969	-0.028809	-24.85	25.5193	29.9744	0.048828	-0.19043	0.067871	52.482	238.6819	603.4213	-1.4917	0.69385	-0.21484	94.797	-121.431	1222.803	-0.25458	0.33615	-0.0011186
2.954	15.075	24.6289	21.6211	-0.060303	-0.028564	-0.020019	-11.35	-5.4108	35.23	0.050293	-0.18799	0.060058	67.963	227.8959	557.419	-1.395	0.64111	-0.19873	151.257	-180.355	1185.024	-0.27392	0.34909	0.0082498
2.956	40.235	14.0331	34.92	-0.082031	-0.010742	-0.013672	-24.011	33.425	24.358	0.044922	-0.18457	0.058105	94.6889	228.903	538.015038	-1.3462	0.61182	-0.19678	178.9871	-240.82	1150.559	-0.28772	0.36562	0.0081462
2.958	9.698	25.8925	24.099	-0.10107	0.0048828	-0.0048828	-22.297	-2.3397	31.3378	0.04834	-0.1748	0.05957	94.7463	226.1522	465.507	-1.2534	0.56299	-0.18945	166.9175	-263.281	1106.9987	-0.2909	0.37151	0.012893
2.96	-4.402	26.813	8.98088	-0.10938	0.016113	-0.00097656	-15.731	30.926	28.699	0.044922	-0.16943	0.058594	59.6031	229.336	459.815	-1.1824	0.52514	-0.18554	179.68028	-293.033	1091.256	-0.28467	0.37793	0.013184
2.962	-2.821	22.2734	28.079	-0.12598	0.040039	0.003418	-14.4717	44.3307	17.1604	0.043945	-0.15479	0.054199	51.546	220.045	399.508	-1.1172	0.48877	-0.17627	154.32596	-249.869	1092.362	-0.26604	0.37645	0.0079439
2.964	-3.417	30.7803	23.1678	-0.13111	0.051758	0.010498	25.3476	-2.1185	15.7879	0.042968	-0.14331	0.05127	36.679	229.029	387.8332	-1.0249	0.43848	-0.16748	137.343	-268.536	1123.12	-0.24385	0.36877	0.0002549
2.966	-24.791	25.1191	11.2702	-0.13525	0.065918	0.018555	-3.189	24.4869	10.1	0.041992	-0.13574	0.047852	57.36	228.47	351.772	-0.98047	0.41748	-0.16211	119.8221	-241.531	1163.9611	-0.21298	0.35873	-0.0085828
2.968	-21.553	30.2342	16.7789	-0.13232	0.083496	0.019531	4.665	12.0808	12.6222	0.038086	-0.11865	0.046387	19.159	220.364	320.167	-0.896	0.36865	-0.14893	86.788	-243.567	1172.25	-0.17703	0.33863	-0.018557
2.97	-16.537	30.523	22.6876	-0.12744	0.096191	0.019043	46.4929	-7.9934	27.358	0.03125	-0.11328	0.044922	26.819	216.998	286.1341	-0.83277	0.33692	-0.14185	94.664	-186.29	1213.205	-0.1416	0.30859	-0.033203
2.972	-32.186	31.12869	24.873	-0.12012	0.10107	0.022461	22.837	23.122	13.5165	0.027832	-0.092285	0.04541	-10.159	193.9354	290.868	-0.77344	0.30713	-0.13281	74.5263	-107.25	1280.417	-0.11511	0.28218	-0.058067
2.974	-42.926	31.97186	18.2086	-0.10254	0.10571	0.023438	42.4439	-25.7677	24.0852	0.020508	-0.078857	0.046386	-9.874	181.927	248.451	-0.69434	0.26367	-0.12207	69.444	-71.11	1360.139	-0.097055	0.24858	-0.088453
2.976	-37.194	15.71187	22.499	-0.084961	0.10889	0.021484	47.0842	-5.4369	26.1457	0.015625	-0.066895	0.043457	-39.975	156.1827	243.618	-0.65283	0.2417	-0.1167	56.2355	-68.98	1373.0722	-0.1011	0.22282	-0.1155
2.978	-29.434	28.0868	48.761	-0.060547	0.098145	0.02002	14.136	16.032	5.2424	0.0073242	-0.049805	0.042969	-42.938	172.59	208.826	-0.57617	0.20117	-0.11328	71.515	-182.177	1402.864	-0.12721	0.1954	-0.13811
2.98	-29.812	25.9959	36.3	-0.044434	0.092285	0.013672	58.6993	-13.4676	14.7321	0.0053711	-0.037109	0.04248	-57.9827	159.671	197.263	-0.51147	0.17309	-0.1101	9.969	-243.6878	1409.0051	-0.17822	0.17139	-0.14893
2.982	-41.2912	25.937	-4.8871	-0.012695	0.074707	0.0073242	27.837	27.565	13.5002	-0.00048828	-0.021973	0.04248	-30.621	168.971	163.93	-0.45117	0.1377	-0.10156	-18.633	-333.809	1467.02	-0.26478	0.14719	-0.15341
2.984	-18.836	14.8249	13.5102	0.011231	0.059327	-0.0012207	-4.788	9.2589	7.5928	-0.0080567	-0.0097654	0.041259	-46.297	134.337	160.694	-0.37402	0.092285	-0.098633	-22.544	-316.855	1514.686	-0.37295	0.13013	-0.15758
2.986	-15.869	15.3358	28.883	0.03418	0.04248	-0.0078125	18.932	-15.6448	3.8508	-0.013672	0.0029297	0.039551	-30.731	142.57	129.3736	-0.33545	0.065918	-0.092285	-69.7426	-324.937	1539.204	-0.49827	0.11528	-0.15568
2.988	11.417	23.2818	37.039	0.066406	0.02002	-0.012695	23.7539	42.329	-6.187	-0.021484	0.014648	0.035645	-51.69	101.326	107.3462	-0.26465	0.020508	-0.08252	-56.173	-297.554	1553.052	-0.63215	0.11053	-0.16887
2.99	-6.841	28.6625	26.591	0.07959	0.010742	-0.023438	-0.998999999999999	3.143	9.5278	-0.024414	0.019531	0.033691	-28.482	104.402	90.4067	-0.21412	-0.02124	-0.082276	-55.078	-262.265	1564.031	-0.77393	0.10693	-0.18555
2.992	25.018	15.5836	41.626	0.098145	-0.0068359	-0.035156	-6.755	17.1413	13.2671	-0.027344	0.031738	0.029297	-20.177	83.031	96.985	-0.16309	-0.053711	-0.078125	-34.043	-224.669	1609.667	-0.92497	0.10947	-0.19676
2.994	19.095	2.665	57.3403	0.11108	-0.01123	-0.043457	-38.399	40.166	-1.418	-0.027832	0.035156	0.023437	6.908	96.441	80.692	-0.11816	-0.089355	-0.090332	-15.305	-143.55319	1645.7287	-1.0877	0.12771	-0.20595
2.996	30.418	1.258	59.9797	0.12207	-0.015137	-0.059082	-28.114	10.94656	-3.335	-0.030762	0.038086	0.018555	12.894	59.5557	76.676	-0.10107	-0.10547	-0.096191	-0.0679999999999978	-93.331	1678.648	-1.2659	0.15584	-0.20674
2.998	26.223	-8.451	65.466	0.13525	-0.019531	-0.070313	-5.771	59.941	-1.4714	-0.029297	0.039063	0.0058594	22.861	72.67	69.482	-0.072754	-0.12549	-0.104	17.83	-19.166	1664.849	-1.4649	0.20134	-0.19366
3	32.341	-5.913	64.167	0.14111	-0.021973	-0.07959	-29.5954	41.612	10.3971	-0.031738	0.038086	0	12.014	10.7205	44.96	-0.050293	-0.14209	-0.10766	23.16	-25.688	1641.745	-1.6777	0.2627	-0.17871
3.002	42.3956	-22.117	74.796	0.14355	-0.020996	-0.10498	-14.037	3.7051	20.4276	-0.030273	0.03418	-0.0097656	21.143	19.4519	30.9223	-0.031738	-0.16016	-0.10889	62.3018	-12.439	1642.967	-1.8855	0.3301	-0.15888
3.004	21.826	-38.3398	80.0638	0.14282	-0.018311	-0.12109	-33.6876	47.8916	-10.086	-0.026367	0.029785	-0.033203	34.874	-11.138	13.5623	-0.018066	-0.17822	-0.10938	79.0083	-35.695	1632.4342	-2.0769	0.39699	-0.14209
3.006	28.893	-49.5363	95.3117	0.14063	-0.0073242	-0.13428	-39.25169	6.63	1.4783	-0.024902	0.021973	-0.04248	54.6992	22.2454	18.0072	-0.014404	-0.18164	-0.10864	46.449	-48.0975	1626.299	-2.2483	0.463	-0.13857
3.008	31.994	-58.5595	113.7872	0.12451	0.013184	-0.14844	-30.196	15.9598	25.8169	-0.026855	0.016113	-0.064453	67.0014	-15.05578	32.7197	-0.016113	-0.18555	-0.11084	44.9406	-42.864	1602.67	-2.3798	0.5382	-0.14063
3.01	34.576	-42.1168	141.9002	0.11035	0.023438	-0.15723	-37.532	21.8512	19.9597	-0.029785	0.0073242	-0.079834	68.0024	-4.1017	29.1	-0.02002	-0.17383	-0.104	36.622	-62.828	1590.962	-2.4727	0.62012	-0.15527
3.012	27.539	-9.7879	198.3321	0.068848	0.049316	-0.16602	-3.20200000000001	-7.8951	38.365	-0.03125	0.00097656	-0.097168	11.313	-36.128	18.3063	-0.029297	-0.16162	-0.10254	42.9409	-22.5172	1588.704	-2.5378	0.7204	-0.18086
3.014	24.302	28.3206	289.357	0.042236	0.068603	-0.1748	-12.24	31.1521	41.1421	-0.039063	-0.0014648	-0.11279	20.427	12.7907	23.1788	-0.040039	-0.14648	-0.086426	73.557	-55.1508	1612.8391	-2.5651	0.83154	-0.19326
3.016	34.064	53.6351	395.0637	0.0087891	0.091309	-0.18262	4.335	-2.911	69.281	-0.041016	-0.0053711	-0.125	39.1907	-1.61265	3.7354	-0.05127	-0.12671	-0.074463	81.1859	-33.9889	1624.9263	-2.5659	0.92919	-0.19209
3.018	4.895	57.196	431.285	-0.040527	0.10938	-0.20264	12.077	-39.31	88.903	-0.058105	-0.014648	-0.14746	50.7711	49.917	2.708	-0.060547	-0.10938	-0.0625	97.497	-58.66	1634.734	-2.5715	0.99687	-0.1959
3.02	-1.123	44.962	428.896	-0.062988	0.11816	-0.21826	-40.13175	-1.094	81.471	-0.071289	-0.016113	-0.17163	17.167	14.0688	-7.3399	-0.080566	-0.08252	-0.04834	104.565	-41.3943	1640.194	-2.5781	1.041	-0.20508
3.022	-21.79	16.53	490.742	-0.12939	0.13721	-0.26904	6.404	-54.677	95.6535	-0.085449	-0.01416	-0.19092	-9.385	39.9168	-11.7084	-0.085449	-0.072266	-0.039063	86.848	14.41	1613.312	-2.5941	1.0541	-0.21729
3.024	-18.944	11.033	579.519	-0.18872	0.15625	-0.2915	61.2914	-61.073	133.928	-0.11963	-0.0058594	-0.21631	-29.158	8.58	-13.0688	-0.10889	-0.049805	-0.026367	79.386	35.689	1603.105	-2.5976	1.0419	-0.21826
3.026	-9.98	5.219	627.113	-0.25293	0.18506	-0.31689	32.422	-56.567	181.997	-0.13818	0.00097656	-0.22119	-27.09	43.661	17.0446	-0.11792	-0.03833	-0.020019	86.24345	99.059	1557.2997	-2.5847	0.98917	-0.21787
3.028	-10.634	-9.626	585.401	-0.36621	0.23438	-0.34082	51.666	-93.01	236.8836	-0.18359	0.01123	-0.23193	-25.53	28.8588	10.8821	-0.12646	-0.025879	-0.011719	45.33	94.607	1499.1287	-2.5677	0.91748	-0.21006
3.03	9.228	-52.152	561.6807	-0.43164	0.25879	-0.34961	46.457	-11.8699	290.36236	-0.22461	0.021485	-0.23731	-45.592	56.803	30.087	-0.1416	-0.019043	0.0024414	13.356	135.277	1466.003	-2.562	0.83252	-0.21094
3.032	-40.2437	-79.38	587.8561	-0.57568	0.31592	-0.34033	32.717	37.253	378.5758	-0.27295	0.032715	-0.24561	-37.568	32.431	5.9177	-0.15088	-0.016113	0.0043945	-6.061	138.854	1428.907	-2.5822	0.76602	-0.21631
3.034	-35.0364	-55.661	608.1365	-0.69849	0.37036	-0.32691	36.967	61.4924	531.2494	-0.34717	0.040527	-0.26855	-45.595	51.295	13.2735	-0.15869	-0.0092773	0.019531	-25.501	152.121	1448.7285	-2.6264	0.71729	-0.23564
3.036	-18.26086	-15.485	638.6619	-0.83789	0.42773	-0.30859	34.418	115.6094	641.1923	-0.39746	0.045898	-0.2876	-44.677	28.1702	8.888	-0.1709	-0.0090329	0.028809	-35.839	148.7308	1433.19	-2.6917	0.69345	-0.26064
3.038	27.077	10.678	665.7316	-1.0391	0.51172	-0.28418	16.757	42.791	714.9584	-0.50195	0.054199	-0.32227	-64.5713	29.1493	13.9638	-0.17334	-0.0078125	0.040527	-65.5035	127.132	1402.848	-2.7656	0.69639	-0.27353
3.04	-23.881	3.649	693.527	-1.1367	0.55957	-0.25879	3.358	44.5228	763.557	-0.60474	0.077881	-0.34009	-38.827	11.112	11.9969	-0.1792	-0.0073242	0.054688	-69.3671	128.953	1342.735	-2.8359	0.72266	-0.30078
3.042	-68.8239	-6.60213	696.737	-1.3325	0.64111	-0.21826	-23.0886	39.2991	841.114	-0.72266	0.11035	-0.34766	-39.5716	30.492	34.2245	-0.17969	-0.0097656	0.060059	-76.0478	125.2463	1333.133	-2.8898	0.77002	-0.32226
3.044	-40.5323	-19.4661	717.56	-1.4832	0.71313	-0.20166	-10.329	-25.438	931.779	-0.90381	0.15869	-0.32227	2.785	23.5371	28.1421	-0.17725	-0.011719	0.074707	-35.6543	197.303	1301.2226	-2.9246	0.82871	-0.3498
3.046	29.968	-7.17	745.962	-1.6323	0.7915	-0.2041	14.026	-3.21999999999999	936.41	-1.0151	0.18311	-0.29834	-21.029	34.719	57.298	-0.17652	-0.011719	0.080078	-32.742	176.835	1327.2046	-2.9437	0.8916	-0.37793
3.048	52.855	0.305000000000007	766.70281	-1.7905	0.92041	-0.22217	0.986000000000001	-34.977	861.468	-1.2617	0.24707	-0.22314	-17.726	35.7621	30.601	-0.17627	-0.010742	0.090332	-14.078	181.931	1330.003	-2.946	0.94814	-0.4081
3.05	7.636	-8.21899999999999	767.8571	-1.8354	0.98682	-0.23535	-10.8851	-104.372	801.304	-1.4839	0.30835	-0.16699	-24.484	33.0758	38.2112	-0.16211	-0.016602	0.10352	12.946	150.6696	1284.586	-2.9434	0.99219	-0.43945
3.052	25.212	-41.841	747.5276	-1.8589	1.0981	-0.26904	-46.5101	-98.474	787.599	-1.7407	0.38037	-0.11572	15.906	44.37222	12.3123	-0.16016	-0.011719	0.10693	13.389	141.475	1247.652	-2.9295	1.0334	-0.46474
3.054	42.921	-90.626	742.21	-1.794	1.164	-0.29663	-52.4818	-126.998	811.1591	-2.125	0.51172	-0.055664	12.367	25.063	28.2642	-0.14307	-0.022461	0.11621	34.382	169.785	1197.994	-2.9164	1.0656	-0.47861
3.056	66.3842	-128.422	767.992	-1.6855	1.2051	-0.33398	-13.6298	-93.892	849.212	-2.3105	0.58789	-0.033203	49.9999	26.07257	24.4081	-0.12744	-0.025635	0.125	43.384	149.03	1176.9499	-2.909	1.0887	-0.48681
3.058	57.864	-160.334	811.299	-1.5015	1.2017	-0.37549	-53.582	-60.572	855.3389	-2.6367	0.77344	-0.014648	45.397	7.8694	48.149	-0.10938	-0.02832	0.12695	38.313	156.809	1113.7354	-2.9261	1.1073	-0.49151
3.06	44.751	-173.111	856.721	-1.4023	1.1709	-0.39355	-82.067	-125.308	877.808	-2.782	0.90747	-0.035156	59.279	28.1967	23.0599	-0.079102	-0.04248	0.12939	35.137	129.974	1067.471	-2.9414	1.123	-0.48438
3.062	17.241	-157.157	899.899	-1.2461	1.0586	-0.43359	-103.892	-135.948	895.752	-2.8027	1.0313	-0.055176	29.141	12.552	38.485	-0.061035	-0.049316	0.12988	54.709	179.199	1001.0338	-2.9557	1.1263	-0.47354
3.064	-22.605	-155.639	914.391	-1.148	0.94189	-0.44092	-94.509	-132.097	898.8281	-2.6284	1.1763	-0.092285	44.3437	24.9534	19.5293	-0.024414	-0.067383	0.12402	99.2105	224.516	973.7885	-2.966	1.1246	-0.45703
3.066	-11.99	-156.195	942.1162	-1.0679	0.80713	-0.44287	-22.51	-145.342	977.0566	-2.4941	1.2305	-0.12305	28.658	-15.1256	34.814	0.0063478	-0.078125	0.12451	102.4762	267.845	942.376	-2.9676	1.1262	-0.44453
3.068	4.791	-154.5162	992.386773	-1.0059	0.63086	-0.44336	-10.142	-75.51	1025.8964	-2.1694	1.314	-0.21191	53.875	8.33564	19.0829	0.038574	-0.09375	0.11816	113.957	285.718	888.591	-2.9551	1.1258	-0.433
3.07	44.748	-136.368	1033.563	-0.98828	0.55664	-0.44629	-4.174	-119.28	1026.2666	-1.9487	1.3257	-0.28809	34.383	-19.8318	18.80104	0.080566	-0.11719	0.11133	98.0114	277.454	856.324	-2.9316	1.125	-0.42188
3.072	36.392	-99.377	1056.202	-0.97461	0.43506	-0.46289	7.695	-202.822	1020.5732	-1.7695	1.2813	-0.34668	27.494	12.596	12.4047	0.10059	-0.12842	0.10498	126.042	274.989	808.431	-2.8889	1.1189	-0.4081
3.074	14.601	-73.018	1059.285	-0.98707	0.37719	-0.49243	0.733999999999998	-216.416	980.115	-1.6226	1.106	-0.396	-21.485	-29.368	15.0287	0.1416	-0.15527	0.092773	141.898	262.179	780.922	-2.8418	1.1	-0.39199
3.076	33.922	-75.83	1087.541	-1.0132	0.34424	-0.50537	22.553	-298.834	1064.493	-1.5737	0.97119	-0.3999	-1.418	20.2287	7.7742	0.16822	-0.17505	0.083007	140.457	285.457	748.3727	-2.7754	1.0766	-0.37754
3.078	46.371	-85.487	1127.3353	-1.0894	0.35059	-0.51807	40.599	-274.171	1170.29	-1.5039	0.66309	-0.39063	-8.03	-3.5882	7.2641	0.19287	-0.19336	0.07959	109.5728	260.435	686.1922	-2.709	1.0414	-0.35801
3.08	55.855	-89.088	1125.637	-1.1406	0.37305	-0.52734	-26.083	-243.991	1200.426	-1.4734	0.44849	-0.37549	2.741	41.811	21.3765	0.21826	-0.21631	0.064453	45.313	256.748	624.42674	-2.644	0.99854	-0.33447
3.082	12.104	-89.941	1141.163	-1.271	0.46729	-0.53857	-67.031	-278.45	1237.475	-1.4722	0.26807	-0.35986	-21.83	7.782	29.4419	0.22705	-0.22803	0.056641	36.243	243.471	580.298	-2.5674	0.95449	-0.30957
3.084	-6.202	-87.384	1165.80924	-1.3789	0.55908	-0.54687	-43.9089	-221.064	1249.069	-1.5332	0.099609	-0.33008	-32.116	46.136	21.181	0.24902	-0.24219	0.046387	28.481	216.534	559.686	-2.4945	0.90625	-0.28125
3.086	-16.383	-77.201	1227.166	-1.4878	0.66846	-0.55957	-16.0136	-191.26	1295.761	-1.5894	0.047852	-0.31396	-73.572	6.80123	-18.0869	0.26318	-0.25659	0.035889	33.878	228.576	533.9215	-2.4227	0.86094	-0.25234
3.088	-23.178	-49.1944	1250.455	-1.6265	0.80029	-0.56396	32.252	-148.2388	1377.62	-1.7534	0.013672	-0.2749	-59.8124	51.3447	-25.739	0.27197	-0.26563	0.030762	34.433	201.6835	514.782	-2.3505	0.81162	-0.23222
3.09	13.941	-67.8962	1284.269	-1.6895	0.86133	-0.56738	35.804	-50.558	1391.8714	-1.9116	0.063232	-0.25684	-32.917	9.768	-9.9699	0.28418	-0.26514	0.020996	10.714	219.098	458.294	-2.2788	0.76416	-0.20703
3.092	18.082	-80.2725	1302.339	-1.7983	0.96924	-0.56982	34.889	-78.457	1385.921	-2.0776	0.16553	-0.25635	-40.834	40.2731	-4.2654	0.28516	-0.26416	0.015137	-7.678	200.8202	397.665	-2.2047	0.71895	-0.18945
3.094	31.923	-92.7088	1332.022	-1.8689	1.0324	-0.57202	45.8312	-65.5	1388.794	-2.2905	0.37256	-0.28857	-40.073	8.5493	9.1633	0.28711	-0.25977	-0.00048828	-10.611	217.129	393.494	-2.1238	0.67353	-0.17822
3.096	21.126	-66.9692	1358.636	-1.9272	1.0933	-0.57373	72.913	-37.496	1397.133	-2.3867	0.48926	-0.3042	-35.973	67.187	4.221	0.28296	-0.25195	-0.0075684	28.007	219.212	363.423	-2.0296	0.63057	-0.16729
3.098	75.262	-43.599	1369.332	-1.998	1.1426	-0.58789	105.942	-81.452	1447.5151	-2.5464	0.71533	-0.32568	-35.124	32.634	17.7702	0.27588	-0.23975	-0.019043	-10.193	219.354	364.994	-1.9296	0.58994	-0.15957
3.1	85.8101	-26.074	1374.04	-2.0327	1.1704	-0.59424	81.907	-27.268	1466.929	-2.6463	0.86743	-0.34937	-17.046	67.023	32.1624	0.25635	-0.20801	-0.029297	1.53	205.786	305.365	-1.8203	0.55225	-0.15479
3.102	80.908	-40.145	1363.5258	-2.0933	1.2134	-0.61182	8.27	-35.362	1434.2132	-2.7168	1.0068	-0.36426	-11.983	11.8569	31.0657	0.24365	-0.19092	-0.032227	-37.394	173.7777	273.974	-1.7109	0.5124	-0.15
3.104	56.959	-62.846	1352.519	-2.1284	1.2368	-0.62402	-31.388	-96.718	1467.2383	-2.7651	1.1333	-0.40381	-4.694	41.696	24.6691	0.21143	-0.14502	-0.037598	-32.803	169.8043	227.728	-1.6062	0.47656	-0.14512
3.106	47.967	-72.7352	1354.954	-2.1343	1.2427	-0.63623	-28.6448	-56	1486.376	-2.7793	1.1699	-0.42969	26.886	7.1137	27.0176	0.17871	-0.11303	-0.041992	8.955	137.2	226.55	-1.5027	0.44102	-0.14589
3.108	34.101	-39.42709	1375.287	-2.1484	1.2422	-0.66016	5.455	-126.505	1517.2248	-2.7676	1.2129	-0.47754	22.188	41.7538	32.9051	0.14502	-0.078613	-0.04834	5.334	150.311	172.394	-1.4103	0.40264	-0.14521
3.11	48.424	-5.8917	1366.1552	-2.1453	1.2337	-0.67846	42.845	-126.392	1558.367	-2.7412	1.2158	-0.50806	22.735	19.661	27.3724	0.099609	-0.033203	-0.053223	44.58	105.595	132.256	-1.3257	0.36719	-0.13965
3.112	45.86	-5.335	1357.6815	-2.1304	1.2212	-0.69189	37.276	-81.7712	1536.202	-2.6948	1.1948	-0.53271	29.098	47.336	30.1596	0.081543	-0.012207	-0.053223	30.075	90.394	117.401	-1.2493	0.32461	-0.13155
3.114	23.836	-13.968	1335.4307	-2.0996	1.1973	-0.71094	19.508	-115.638	1553.325	-2.6147	1.1333	-0.55225	49.704	12.9177	10.233	0.038574	0.026367	-0.056152	37.648	81.234	107.115	-1.1764	0.28633	-0.12803
3.116	26.217	-14.816	1353.323	-2.0815	1.1782	-0.72217	49.9731	-42.378	1565.152	-2.5737	1.0903	-0.55811	49.062	40.492	36.889	0.0095215	0.051269	-0.060791	64.4277	76.2284	135.634	-1.1061	0.24922	-0.12764
3.118	34.394	1.986	1347.906	-2.0444	1.147	-0.74268	69.5067	-29.618	1520.52296	-2.5059	1.0078	-0.56152	70.1837	20.0895	40.695	-0.015625	0.075195	-0.062988	106.015	110.444	104.826	-1.035	0.2123	-0.13106
3.12	63.37	8.399	1354.1506	-2.0076	1.1194	-0.75855	54.3776	-72.08	1555.3145	-2.4597	0.93531	-0.55957	32.175	25.592	56.559	-0.041992	0.10938	-0.05957	91.5014	70.795	96.425	-0.96875	0.17529	-0.13672
3.122	74.388	2.733	1366.823	-1.9727	1.082	-0.76758	20.176	-8.468	1543.937	-2.416	0.86523	-0.55078	21.426	11.2901	25.0105	-0.057617	0.125	-0.056641	55.7511	74.29	53.4787	-0.8998	0.14707	-0.13135
3.124	63.383	-9.031	1378.355	-1.9233	1.0474	-0.78467	-30.412	-40.1627	1508.69	-2.373	0.79492	-0.54688	-8.403	11.7741	19.6994	-0.079102	0.1499	-0.060547	56.933	35.6312	51.6667	-0.83125	0.11895	-0.12754
3.126	63.363	-13.095	1360.935	-1.8965	1.0293	-0.79297	-35.949	-0.0862999999999996	1514.193	-2.355	0.76807	-0.53857	14.859	4.859	7.29055	-0.092286	0.16504	-0.0625	69.1272	44.0024	46.776	-0.75977	0.093946	-0.12988
3.128	52.322	-20.8876	1335.465	-1.8491	0.99658	-0.80615	-15.945	78.406	1461.67755	-2.3242	0.72021	-0.55273	9.724	10.837	44.959	-0.098145	0.17334	-0.069824	81.887	37.0129	25.35	-0.69209	0.072656	-0.13448
3.13	53.295	-17.3157	1325.6647	-1.8188	0.96924	-0.81005	-4.29499999999999	8.355	1468.334	-2.3101	0.70264	-0.55273	9.425	-4.321	55.518	-0.10498	0.17773	-0.082031	76.115	25.0848	5.194	-0.625	0.056152	-0.13916
3.132	33.531	-7.4026	1320.272	-1.791	0.9375	-0.80859	22.752	25.308	1462.3607	-2.293	0.68945	-0.55566	-7.107	-24.7295	100.114	-0.10645	0.17725	-0.09668	19.341	19.0665	-15.6425	-0.5582	0.043946	-0.14219
3.134	17.303	-3.632	1301.7477	-1.7632	0.90576	-0.80518	-16.291	18.88	1421.88	-2.269	0.68408	-0.55518	-35.6234	-42.081	83.163	-0.092773	0.16406	-0.11377	-21.876	25.0596	-24.5036	-0.49571	0.035059	-0.14639
3.136	10.112	-8.795	1278.323	-1.7559	0.88477	-0.80176	-5.311	-12.408	1455.8511	-2.2593	0.68408	-0.55322	-69.997	-41.7084	142.123	-0.078369	0.15502	-0.13013	0.632999999999999	55.761	-1.0825	-0.43203	0.023731	-0.15185
3.138	17.575	-4.5898	1289.416	-1.7339	0.85596	-0.79346	46.007	88.716	1459.12	-2.2383	0.68945	-0.55273	-32.945	-5.465	184.6758	-0.063477	0.14209	-0.15332	30.77	49.9737	31.0139	-0.37676	0.014649	-0.15098
3.14	44.202	11.0451	1284.199	-1.7251	0.83497	-0.78711	50.783	47.097	1432.222	-2.2202	0.6919	-0.54882	-13.257	-14.8359	246.283	-0.037109	0.11963	-0.17383	-30.219	52.518	30.5158	-0.33447	0.01123	-0.15088
3.142	39.659	35.2859	1260.0689	-1.7168	0.81934	-0.77734	89.389	27.963	1429.8316	-2.207	0.69727	-0.54492	7.419	22.8796	255.342	-0.019531	0.10547	-0.18652	-31.1992	19.518	31.3845	-0.30078	0.0063476	-0.16778
3.144	70.994	56.776	1222.711	-1.7065	0.80322	-0.76709	59.093	48.7497	1388.2244	-2.1895	0.69873	-0.53418	-9.197	19.2897	346.762	0.0078125	0.081055	-0.21484	-55.8606	11.8746	22.8273	-0.26865	0.0034179	-0.16934
3.146	71.457	74.761	1216.486	-1.7031	0.79297	-0.75391	25.791	-20.3741	1397.4527	-2.1753	0.70166	-0.52686	-41.486	81.582	395.925	0.03125	0.059814	-0.22949	-72.8307	31.131	23.1595	-0.22451	-0.0071289	-0.15879
3.148	74.225	80.276	1213.4	-1.7012	0.78906	-0.74609	58.3182	55.514	1409.831	-2.1499	0.70068	-0.50635	-82.9136	89.2738	523.513	0.05127	0.041992	-0.24512	-42.435	28.782	53.059	-0.18017	-0.020996	-0.15068
3.15	67.019	79.386	1209.429	-1.7	0.78833	-0.73218	50.9509	82.7309	1370.0881	-2.133	0.69751	-0.49145	-30.913	136.83	607.931	0.07666	0.021973	-0.2627	-39.5118	47.463	28.79	-0.14307	-0.040039	-0.15283
3.152	80.071	58.801	1175.2591	-1.6968	0.78955	-0.72217	41.303	46.069	1350.8096	-2.1147	0.69092	-0.48584	-28.182	92.1569	737.8782	0.085938	0.0073242	-0.27197	-48.6525	-4.86154	26.76409	-0.11972	-0.054883	-0.16055
3.154	70.129	32.4969	1158.6697	-1.6973	0.79883	-0.70605	44.853	104.495	1286.596	-2.0815	0.68018	-0.46484	-13.421	88.769	821.123	0.11133	-0.020508	-0.2959	-86.365	6.5737	12.473	-0.094141	-0.069043	-0.16377
3.156	28.103	19.5253	1130.2818	-1.6948	0.80322	-0.70068	-6.446	49.304	1232.985	-2.0659	0.67432	-0.45068	-19.467	-15.5807	893.8899	0.11963	-0.037109	-0.3269	-71.945	-15.8877	41.3195	-0.069531	-0.079199	-0.16181
3.158	13.319	20.674	1111.787	-1.6772	0.81494	-0.67822	13.609	77.2318	1245.313306	-2.0234	0.66992	-0.43506	-7.32	0.243000000000002	951.0833	0.12305	-0.05127	-0.35498	-57.9441	9.08858	62.824	-0.045801	-0.092383	-0.15352
3.16	36.751	31.017	1086.353	-1.6616	0.82276	-0.66748	40.6254	166.371	1222.154	-1.987	0.67066	-0.42358	4.976	-60.328	1023.3144	0.11621	-0.062988	-0.40186	2.493	13.7979	53.6218	-0.015137	-0.1084	-0.13916
3.162	55.332	45.3305	1060.0425	-1.6382	0.82666	-0.65771	25.1581	104.562	1204.608	-1.9395	0.67188	-0.41357	78.225	-33.123	1038.5587	0.10352	-0.064453	-0.41943	-4.287	13.6311	33.458	0.0051758	-0.1334	-0.1417
3.164	52.27	58.5616	1036.9291	-1.5952	0.81689	-0.64404	29.7572	150.744	1191.28287	-1.8687	0.66357	-0.40283	98.337	-123.755	1059.221	0.036621	-0.056641	-0.45459	-17.6172	-8.403	-15.7883	0.019238	-0.15108	-0.14795
3.166	56.031	59.6459	1019.923	-1.5718	0.81104	-0.63623	3.972	152.405	1140.893	-1.8315	0.65381	-0.39795	58.0231	-129.569	1009.885	-0.055909	-0.023437	-0.4834	25.16	-2.926	24.8813	0.027441	-0.16631	-0.1542
3.168	57.607	55.637	1011.677	-1.5229	0.79346	-0.62012	12.815	127.222	1136.6827	-1.7632	0.64795	-0.38232	14.2246	-217.533	1023.573	-0.17578	0.020508	-0.5	39.3544	22.91512	39.3992	0.032519	-0.17607	-0.1542
3.17	63.257	80.059	1010.977	-1.4834	0.77344	-0.60278	47.959	216.038	1105.8253	-1.7163	0.63281	-0.36694	-11.06	-169.307	1063.745	-0.35596	0.091309	-0.49951	70.76178	13.0882	47.3339	0.041992	-0.18604	-0.14844
3.172	71.026	98.343	987.5999	-1.4458	0.75635	-0.59619	2.398	165.865	1069.0157	-1.6719	0.62109	-0.35156	-31.266	-200.562	1127.125	-0.4585	0.12744	-0.49414	68.464	36.4621	13.665	0.05166	-0.19873	-0.14971
3.174	50.644	94.826	951.324	-1.3965	0.73047	-0.57715	-15.396	143.1212	1081.438	-1.6191	0.60156	-0.33057	-32.1702	-152.194	1144.5778	-0.6792	0.20068	-0.47412	64.1629	0.4512	0.3149	0.042383	-0.20332	-0.14854
3.176	37.929	91.529	925.1143	-1.3721	0.72168	-0.56543	-32.6228	162.4501	1045.213	-1.5894	0.59033	-0.31299	-28.624	-237.265	1163.378	-0.84375	0.25147	-0.43896	28.88	-6.2434	7.40578	0.036524	-0.20254	-0.14541
3.178	16.436	104.413	893.2538	-1.3242	0.69727	-0.54883	-58.6828	72.237	1025.515	-1.5356	0.56885	-0.29346	-60.6764	-198.6978	1176.809	-0.9707	0.29834	-0.35352	54.9414	-3.50547	12.223	0.030664	-0.20351	-0.14228
3.18	3.085	116.243	864.556	-1.2891	0.68603	-0.53149	-12.518	146.4452	991.973	-1.4956	0.55005	-0.2788	-63.4529	-232.183	1232.615	-1.2925	0.41309	-0.35449	74.3997	14.2376	20.889	0.015137	-0.2085	-0.13232
3.182	-3.703	108.9071	854.6476	-1.2544	0.67627	-0.51416	-30.083	166.145	929.05	-1.4546	0.53955	-0.26514	-41.04	-141.17	1291.0673	-1.4624	0.49072	-0.34033	63.265	45.084	-13.216	0.0024414	-0.20732	-0.12813
3.184	2.92100000000001	104.533	839.2588	-1.2163	0.66357	-0.49561	-47.123	145.2875	895.379	-1.3984	0.52295	-0.24707	-43.3603	-156.75	1316.057	-1.8496	0.66406	-0.27344	68.969	15.2662	-10.7467327	-0.018359	-0.2042	-0.1167
3.186	8.38699999999999	94.3128	814.973	-1.1997	0.65674	-0.48584	-19.2743	223.368	853.5627	-1.3633	0.51758	-0.24268	-71.854	-118.56	1343.175	-2.2852	0.87109	-0.24414	18.457	25.2425	-4.076	-0.040235	-0.20069	-0.10811
3.188	0.906999999999996	104.1312	793.876	-1.1558	0.65088	-0.46631	-36.4902	177.563	840.419	-1.2969	0.51074	-0.22852	-46.163	-201.93	1343.848	-2.5176	0.99609	-0.24219	16.649	18.6636	18.6374	-0.064551	-0.18769	-0.097755
3.19	15.594	102.701	768.6143	-1.1228	0.64868	-0.4563	10.206	190.724	849.193	-1.2454	0.49975	-0.21704	-58.5482	-210.3251	1363.333	-2.8867	1.248	-0.22852	32.087	48.9286	38.017	-0.088379	-0.17188	-0.087891
3.192	27.851	114.896	762.767	-1.0933	0.64697	-0.44287	58.628	218.102	824.776	-1.1973	0.48828	-0.20508	-42.1051	-254.48	1405.121	-2.9958	1.3987	-0.23169	16.467	52.6006	33.96	-0.11729	-0.1584	-0.072656
3.194	35.73	116.252	745.9807	-1.0474	0.63721	-0.42773	4.793	155.5762	783.302	-1.1304	0.46924	-0.19238	-84.622	-232.4343	1436.433	-2.9683	1.4985	-0.24414	-35.4421	36.9795	12.6804	-0.14043	-0.14131	-0.057812
3.196	22.687	112.203	723.9075	-1.0229	0.63721	-0.41943	-15.456	228	722.1802	-1.0957	0.45508	-0.18457	-120.86	-248.889	1464.15	-2.6895	1.4004	-0.31055	-59.5266	35.299	12.2578	-0.15527	-0.12334	-0.041797
3.198	7.29	118.336	705.671	-0.97998	0.62158	-0.40186	-35.6476	221.261	681.1661	-1.0352	0.42871	-0.16992	-159.277	-248.166	1497.426	-2.4155	1.1841	-0.38916	-69.374	29.7495	21.297	-0.16846	-0.10986	-0.032129
3.2	2.314	124.734	693.866	-0.94727	0.60865	-0.38623	-27.764	170.53	679.6668	-0.98879	0.41065	-0.16187	-119.148	-247.584	1521.65	-1.6738	0.8125	-0.4917	-71.293	42.167	30.2759	-0.17432	-0.1001	-0.015137
3.202	-2.309	132.412	668.976	-0.91846	0.6001	-0.37354	1.189	201.0024	647.264	-0.93945	0.39063	-0.14844	-43.491	-227.061	1555.669	-1.5623	1.0091	-0.65308	-14.432	25.476	37.489	-0.17207	-0.089942	-0.0055666
3.204	3.09800000000001	117.1141	648.421	-0.87305	0.57813	-0.35303	-15.91343	115.907	592.1693	-0.87402	0.36816	-0.13867	13.15	-186.702	1556.495	-1.8491	1.2446	-0.73389	-81.003	26.57356	20.63	-0.16943	-0.084375	0.0063476
3.206	13.747	104.0609	613.1026	-0.85156	0.56836	-0.34473	-10.8622	126.81	562.935	-0.84375	0.35352	-0.13281	-5.552	-148.812	1556.3135	-2.187	1.3755	-0.55615	-81.506	7.1648	23.599	-0.16318	-0.084766	0.016504
3.208	-4.782	98.016	583.5828	-0.81592	0.54492	-0.33008	-14.7605	177.452	523.012	-0.77539	0.3335	-0.12549	16.486	-76.216	1546.8349	-2.2612	1.3501	-0.52393	-54.6489	8.4673	44.1875	-0.15781	-0.086035	0.029687
3.21	-5.693	111.69841	550.7001	-0.78198	0.5254	-0.31518	-18.5496	117.7591	526.352	-0.70752	0.31152	-0.11133	54.824	-55.677	1565.404	-2.2866	1.1772	-0.64795	-43.91	6.5718	63.374	-0.14941	-0.088867	0.040527
3.212	22.084	109.5826	543.456	-0.75342	0.51221	-0.30225	22.394	171.575	494.842	-0.67676	0.29639	-0.11133	101.4963	-14.995	1570.762	-2.1336	1.0198	-0.70971	-17.755	0.88479	65.3	-0.14111	-0.098732	0.04834
3.214	33.977	107.284	534.458	-0.71875	0.49414	-0.29102	13.9764	150.481	458.7317	-0.61523	0.27539	-0.10352	149.879	-55.083	1603.134	-1.9082	0.86621	-0.71875	-13.966	13.7674	19.3645	-0.14121	-0.10977	0.055078
3.216	19.203	111.103	508.3714	-0.69775	0.48438	-0.28564	19.60944	120.7436	442.64265	-0.57031	0.25366	-0.097656	148.841	-35.984	1560.24	-1.7993	0.5415	-0.66748	-10.782	-17.402	11.454	-0.14082	-0.11485	0.071093
3.218	20.627	108.276	473.0498	-0.65625	0.46191	-0.27246	-5.96999	184.529	419.116	-0.52686	0.24072	-0.087891	84.286	-74.0178	1566.588	-1.7969	0.49121	-0.65234	-39.5768	10.15	15.0522	-0.14522	-0.12256	0.085254
3.22	11.692	115.301	450.6332	-0.62866	0.4458	-0.26734	-56.719	140.6429	389.1278	-0.47607	0.21143	-0.073242	23.149	-19.0117	1530.949	-1.9722	0.5918	-0.66553	23.496	-5.6319	40.0779	-0.14795	-0.12891	0.10156
3.222	10.129	119.931	452.669	-0.59814	0.43408	-0.25439	-35.626	157.968	363.90356	-0.45703	0.19971	-0.064453	45.453	-43.861	1551.709	-2.1228	0.698	-0.6062	50.2763	1.826	50.721	-0.14776	-0.12597	0.10723
3.224	-1.577	132.862	439.7743	-0.55811	0.41455	-0.23779	-25.1254	171.684	312.8569	-0.41357	0.18213	-0.041504	101.9517	-14.4991	1562.9369	-2.2612	0.78174	-0.57715	59.0562	-6.5208	7.1201	-0.14395	-0.12236	0.11953
3.226	7.765	130.113	412.3703	-0.54053	0.39941	-0.22852	-62.953	79.712	266.848	-0.39307	0.17358	-0.033203	90.6623	-61.092	1600.796	-2.4453	0.89258	-0.63086	34.8155	-0.11	1.608	-0.12715	-0.12158	0.12305
3.228	-23.347	102.6588	386.816	-0.50732	0.37646	-0.21191	-50.8525	123.8666	244.2677	-0.37354	0.15576	-0.024414	100.4243	-31.876	1589.027	-2.5234	0.94141	-0.64844	46.541	19.4993	-0.380000000000001	-0.10586	-0.1167	0.12646
3.23	-19.788	85.4778	381.312	-0.48389	0.36157	-0.19605	-39.955	102.3263	224.5373	-0.35107	0.14893	-0.0053711	78.498	-68.492	1631.379	-2.6538	1.0552	-0.65186	68.7911	29.062	29.865	-0.077148	-0.10938	0.12598
3.232	-32.391	78.9805	365.927	-0.4624	0.34961	-0.18408	-44.2003	80.0399	225.6031	-0.3374	0.14795	-0.0048828	55.612	0.0259999999999998	1601.0923	-2.729	1.1586	-0.65625	84.176	44.764	10.917	-0.038281	-0.10469	0.12325
3.234	-18.896	87.6957	347.9469	-0.43018	0.33252	-0.16699	-15.159	139.961	204.582	-0.31982	0.1416	0.0073242	42.13	-27.565	1601.6373	-2.7871	1.248	-0.66602	83.3866	6.76889	-1.753	0.003125	-0.10117	0.11865
3.236	7.846	83.1905	335.6	-0.41357	0.3252	-0.15869	-37.2873	97.319	176.473	-0.30151	0.14306	0.010498	48.595	49.199	1545.7766	-2.7832	1.3242	-0.70898	47.9076	22.7292	-27.1293	0.041406	-0.097656	0.11397
3.238	2.271	80.2464	304.4141	-0.39014	0.31201	-0.15381	-15.73	110.68	142.667	-0.2832	0.13867	0.016602	41.955	0.625	1511.3033	-2.7305	1.3086	-0.73438	54.3577	15.5558	2.3509	0.082129	-0.10664	0.10195
3.24	-16.78	85.64	281.42484	-0.36743	0.3042	-0.14599	-5.289	124.7	118.30622	-0.25928	0.13477	0.027832	-14.746	72.964	1490.109	-2.5645	1.209	-0.78125	13.211	31.5333	20.304	0.11719	-0.11621	0.094727
3.242	-31.91	82.584	260.4125	-0.34619	0.29346	-0.14209	-23.849	76.2514	138.7596	-0.24609	0.13525	0.037598	-34.645	29.6386	1500.921	-2.4323	1.2063	-0.80835	27.333	43.806	20.8224	0.14453	-0.12548	0.084472
3.244	0.863	84.092	266.728	-0.31104	0.28174	-0.12939	0.718	133.875	133.403	-0.22266	0.12695	0.041016	-69.7147	110.282	1484.8753	-2.3906	1.2559	-0.8291	27.886	33.3299	47.288	0.16406	-0.13838	0.072363
3.246	-17.38	92.884	273.648	-0.29785	0.27197	-0.1123	-0.4423	103.229	90.1937	-0.20386	0.12133	0.052002	-66.2299	70.1311	1496.602	-2.4526	1.3208	-0.81787	-26.1869	23.767	35.38564	0.16953	-0.15127	0.059863
3.248	-27.768	90.022	263.869	-0.26855	0.25586	-0.1084	-19.6502	58.2033	77.6634	-0.18457	0.11328	0.056641	-78.8126	115.4224	1416.9975	-2.4727	1.334	-0.80664	-23.67	-35.369	73.8297	0.17676	-0.16181	0.049707
3.25	-15.558	79.1741	237.765	-0.24414	0.24756	-0.097169	-10.91	88.843	50.5304	-0.15283	0.10498	0.070313	-69.376	52.351	1370.723	-2.4585	1.3247	-0.79834	-50.8552	-3.907	115.2115	0.18652	-0.17236	0.049316
3.252	-3.326	80.1937	222.2587	-0.2207	0.23291	-0.090332	-8.906	46.0581	53.9319	-0.13525	0.09375	0.07373	-37.22	110.152	1340.563	-2.4026	1.2786	-0.81469	-68.9145	-2.401	165.03	0.1916	-0.18994	0.048438
3.254	-7.41800000000001	79.685	217.4457	-0.18652	0.21631	-0.07666	12.301	73.429	67.1586	-0.10107	0.080566	0.085449	-26.282	68.058	1313.0785	-2.3198	1.2095	-0.82373	-43.7204	13.14	218.682	0.18896	-0.2044	0.044531
3.256	-29.1	84.749	204.02851	-0.16895	0.20703	-0.075195	35.3248	81.512	38.2102	-0.072265	0.0708	0.087647	-21.058	134.65	1308.8872	-2.1909	1.0981	-0.81104	-22.786	-10.8269	240.624	0.17647	-0.21377	0.038281
3.258	-3.555	65.1063	192.2703	-0.1333	0.19238	-0.071289	14.667	2.274	37.8134	-0.041016	0.056152	0.092285	0.105	64.149	1289.363	-2.1504	1.0449	-0.78711	-49.8	-24.0595	280.958	0.15635	-0.21494	0.034863
3.26	8.434	55.712	166.6866	-0.14478	0.19287	-0.10083	28.7971	39.9567	24.8338	0.00048828	0.041504	0.095703	-6.581	105.768	1283.9187	-2.1069	0.96338	-0.77441	-53.775	-9.7387	358.919	0.13037	-0.20801	0.027832
3.262	6.091	44.858	147.8647	-0.13232	0.19092	-0.086426	24.948	21.5504	23.5981	0.020996	0.032227	0.099121	39.8567	64.225	1270.509	-2.113	0.91235	-0.75366	-57.21776	38.0146	461.012	0.096583	-0.20068	0.023828
3.264	-0.310000000000002	36.7272	148.09	-0.056152	0.16113	-0.046875	29.901	23.8045	48.947	0.055664	0.011719	0.099121	64.908	142.5064	1228.953	-2.1309	0.86719	-0.72754	-67.979	89.294	507.731	0.06416	-0.18291	0.015918
3.266	15.058	53.0187	151.6784	-0.031738	0.14307	-0.037598	39.648	80.729	33.942	0.087158	-0.0004883	0.097901	63.0609	139.78	1186.739	-2.0957	0.90234	-0.72461	-50.829	87.3423	577.729	0.031738	-0.15596	0.0081055
3.268	21.139	63.111	138.8631	0.010742	0.10889	-0.025879	6.064	21.5324	25.9988	0.10693	-0.010742	0.081055	34.745	181.391	1144.68	-2.0679	0.92236	-0.72217	-69.45	97.748	652.1248	0.0046876	-0.12315	-0.0030273
3.27	-3.054	75.606	115.59906	0.028076	0.089599	-0.02002	4.316	28.1559	31.871	0.095703	-0.018066	0.056641	15.656	119.212	1093.5904	-1.9961	0.92188	-0.70313	-66.848	54.893	735.857	-0.012207	-0.09375	-0.020508
3.272	-4.432	74.816	111.6907	0.035156	0.081543	-0.035156	-20.6241	24.5747	32.51	0.1333	-0.02832	0.091797	33.417	143.447	1061.979	-1.948	0.91187	-0.69116	-36.906	33.098	824.0389	-0.025976	-0.065527	-0.03291
3.274	-6.923	65.8841	128.819	0.045898	0.06543	-0.027832	-12.726	-2.739	46.027	0.2041	-0.10742	0.1377	59.7801	120.705	1038.624	-1.9082	0.9043	-0.67578	-13.1909	-1.4018	856.7629	-0.030469	-0.047266	-0.051465
3.276	15.846	66.225	122.909	0.054199	0.0625	-0.024902	18.089	35.8565	42.42	0.22973	-0.15503	0.1499	96.2622	200.676	998.978	-1.8589	0.89502	-0.64209	-14.332	-63.8135	893.107	-0.038672	-0.030469	-0.068652
3.278	-12.469	69.161	97.5882	0.068848	0.045898	-0.015137	-6.633	8.4902	8.5927	0.23633	-0.19189	0.15869	89.067	212.831	960.855	-1.8457	0.89063	-0.62305	30.5393	-66.938	892.034	-0.040527	-0.02207	-0.089941
3.28	-3.183	68.644	70.993527	0.080566	0.042969	-0.0063477	-21.387	-11.8763	8.964	0.23486	-0.2168	0.14941	48.503	267.471	904.934	-1.8149	0.88525	-0.59814	87.5414	-140.397	906.2147	-0.04541	-0.019043	-0.10596
3.282	1.435	50.3169	74.238	0.088867	0.040039	-0.0019531	-14.54	20.7723	1.7444	0.22559	-0.22803	0.14502	34.3508	248.025	854.199	-1.783	0.88306	-0.57593	90.0979	-145.337	875.831	-0.05	-0.016016	-0.12295
3.284	-11.568	48.594	63.8325	0.095703	0.041992	-0.0024414	-8.67	-0.9501	17.3871	0.20752	-0.24414	0.14941	54.589	271.608	844.031	-1.7397	0.87354	-0.56201	75.6886	-196.094	850.379	-0.057617	-0.019531	-0.12646
3.286	-10.913	42.996	53.5983	0.10156	0.04248	-0.0048828	0.645	27.487	41.236	0.20703	-0.25	0.16382	60.4411	254.336	825.2929	-1.668	0.84863	-0.5332	41.641	-195.111	857.205	-0.063477	-0.03086	-0.15108
3.288	-9.638	42.354	35.8114	0.10059	0.05127	-0.003418	-15.094	30.6744	33.362	0.20703	-0.25781	0.1665	22.726	260.628	811.46	-1.6333	0.83252	-0.51807	40.8206	-196.594	881.433	-0.075	-0.038379	-0.15947
3.29	17.117	33.907	54.1247	0.1123	0.047363	-0.0048828	-25.7588	-13.0129	31.207	0.2085	-0.25586	0.16797	-35.863	242.6733	754.297	-1.5547	0.79492	-0.49023	2.561	-172.141	951.7999	-0.087891	-0.05127	-0.16357
3.292	-24.194	46.213	50.0467	0.11914	0.044434	-0.0053711	-17.672	22.0221	22.7868	0.20752	-0.25244	0.17041	-93.342	239.8626	703.631	-1.4951	0.76806	-0.46289	18.5972	-175.043	991.3484	-0.093457	-0.061426	-0.17608
3.294	-26.625	54.224	34.6761	0.12646	0.044922	-0.011719	-24.674	7.4345	16.1695	0.21777	-0.24707	0.16455	-115.096	227.3834	661.1904	-1.4375	0.73926	-0.4375	-2.033	-206.3639	1030.766	-0.099804	-0.075781	-0.18242
3.296	13.652	61.478	49.741	0.13355	0.044434	-0.016358	-16.126	-12.9982	41.183	0.22852	-0.24267	0.15039	-94.018	212.951	637.373	-1.3726	0.70752	-0.396	-43.3597	-193.086	1047.109	-0.10371	-0.082031	-0.19492
3.298	5.847	49.322	56.013	0.14307	0.041992	-0.019531	-0.204999999999998	18.0804	10.7361	0.24365	-0.24365	0.14307	-107.042	219.224	589.259	-1.3359	0.69336	-0.38037	-51.934	-184.899	1098.8194	-0.10283	-0.089844	-0.20938
3.3	-23.594	31.091	61.547	0.14795	0.038574	-0.028809	-12.793	-14.4845	-2.24975	0.26074	-0.24609	0.125	-102.791	212.623	549.951	-1.2695	0.66504	-0.34131	-70.547	-124.3	1127.501	-0.10645	-0.094238	-0.22656
3.302	-29.28	31.925	42.294	0.14746	0.034668	-0.032227	11.656	11.5986	-1.36419	0.27002	-0.25	0.12354	-106.784	203.035	502.321	-1.2156	0.64575	-0.31763	-32.0838	-127.58	1173.952	-0.11543	-0.09414	-0.2415
3.304	0.497	34.977	25.382	0.15332	0.035645	-0.032715	13.476	23.4282	-12.1148	0.28271	-0.25781	0.10498	-102.524	189.383	495.658	-1.1714	0.61572	-0.28857	-31.0415	-129.484	1204.03	-0.13643	-0.089063	-0.24658
3.306	3.395	34.019	27.38	0.15308	0.032959	-0.033691	6.544	-2.94073	24.79055	0.2898	-0.26221	0.089844	-91.136	207.794	462.3708	-1.1045	0.60449	-0.25781	-33.6888	-175.741	1214.722	-0.17861	-0.083204	-0.25049
3.308	-0.692999999999998	35.555	33.9566	0.15381	0.03418	-0.032715	36.802	28.142	18.9114	0.28906	-0.26953	0.074707	-82.214	189.262	431.0172	-1.0654	0.60059	-0.24658	-58.5432	-215.372	1267.54	-0.23398	-0.077344	-0.25684
3.31	-4.16	28.303	12.3699	0.14844	0.038574	-0.035156	9.261	9.7592	-1.9764	0.2832	-0.27051	0.0625	-85.486	203.518	406.281	-0.98633	0.58691	-0.20947	-59.654	-207.2823	1318.584	-0.31104	-0.074219	-0.27148
3.312	14.131	30.0406	10.4459	0.14795	0.037109	-0.029785	4.284	3.0893	11.9914	0.28223	-0.27344	0.056641	-83.903	172.119	365.148	-0.93261	0.56665	-0.18554	-90.02	-234.032	1380.552	-0.40469	-0.071484	-0.26504
3.314	13.543	24.5155	12.2386	0.146	0.036133	-0.029297	36.9219	33.829	5.849	0.27148	-0.27441	0.041992	-84.764	197.2085	343.962	-0.88135	0.54443	-0.16992	-118.898	-223.73	1430.149	-0.51074	-0.062305	-0.2625
3.316	-11.261	31.31	34.9333	0.14477	0.037841	-0.028076	9.369	7.0313	1.262	0.25806	-0.26441	0.037354	-52.866	153.9081	320.702	-0.81494	0.52002	-0.13623	-116.621	-228.295	1461.668	-0.63262	-0.052539	-0.24883
3.318	7.451	26.8171	49.534	0.14258	0.040039	-0.026855	13.495	19.851	27.3092	0.24609	-0.25879	0.027344	-44.8658	166.74	276.5856	-0.7793	0.5	-0.12646	-97.769	-192.371	1465.035	-0.77559	-0.034375	-0.22764
3.32	14.927	33.482	35.95	0.14404	0.039063	-0.026855	11.302	44.07	-3.7335	0.22461	-0.24023	0.01416	-20.647	103.7386	233.9547	-0.7124	0.47412	-0.10059	-28.671	-169.562	1461.2928	-0.9292	-0.0097656	-0.19775
3.322	16.201	33.234	16.724	0.14453	0.041992	-0.02832	4.641	9.9719	5.877	0.21436	-0.22852	0.010742	-19.214	105.56	181.028	-0.67261	0.45093	-0.082764	-27.319	-111.6095	1486.0713	-1.0965	0.027539	-0.1582
3.324	-11.616	32.0852	8.1106	0.14648	0.036621	-0.032227	20.29	34.183	17.6368	0.19092	-0.20068	-0.00048828	13.6218	66.438	157.561	-0.62744	0.42285	-0.067383	11.087	-82.283	1518.0077	-1.2738	0.074122	-0.1124
3.326	8.134	23.611	34.435	0.15186	0.029541	-0.036866	7.518	12.2406	-4.7748	0.17407	-0.17651	-0.0058594	57.3255	127.042	166.7	-0.57617	0.3916	-0.052734	28.944	-78.281	1529.362	-1.4719	0.13349	-0.074512
3.328	2.83600000000001	26.95	36.301	0.15381	0.026367	-0.041016	-3.942	0.549200000000001	14.3008	0.15381	-0.15527	-0.014648	92.692	78.1429	157.456	-0.54736	0.38135	-0.041504	64.0411	-78.149	1524.59	-1.6913	0.21182	-0.054785
3.33	5.441	25.8661	21.9604	0.1582	0.026855	-0.046875	20.156	44.3769	-2.68028	0.12988	-0.11279	-0.022949	80.832	98.271	123.0117	-0.49365	0.34766	-0.021973	115.677	-89.0582	1536.366	-1.9243	0.30322	-0.058594
3.332	19.477	21.1026	15.5808	0.15967	0.022949	-0.048828	-24.896	16.3401	-5.6825	0.12012	-0.10059	-0.024902	53.1206	41.5697	93.5915	-0.45703	0.31982	-0.0065918	127.207	-50.86	1539.1775	-2.1104	0.41679	-0.082422
3.334	4.85	8.763	19.5049	0.16406	0.022461	-0.047363	-20.726	33.9329	6.7803	0.097168	-0.064941	-0.033691	31.817	102.505	59.2796	-0.42188	0.29541	-0.0068359	116.073	-47.27	1551.852	-2.2261	0.51943	-0.10684
3.336	7.682	8.9055	30.1387	0.16577	0.023193	-0.043945	-11.739	56.779	10.4509	0.084228	-0.036132	-0.037109	42.096	74.9778	73.478	-0.37061	0.26221	0.011719	48.8193	-27.0594	1517	-2.2554	0.59482	-0.12324
3.338	-12.132	21.2739	27.379	0.16602	0.025391	-0.041504	-14.905	29.8348	35.193	0.070313	-0.013184	-0.040527	41.567	129.454	45.9949	-0.34912	0.24365	0.017578	56.5468	-16.214542	1495.37	-2.23	0.65752	-0.18437
3.34	5.05	38.165	21.4232	0.16406	0.025879	-0.03418	8.736	57.001	39.698	0.053223	0.023438	-0.044922	50.9586	51.886	26.617	-0.30859	0.20947	0.027344	56.796	-35.64231	1522.416	-2.1484	0.7168	-0.25488
3.342	-3.7	26.4786	28.3625	0.1626	0.027344	-0.032227	-25.3309	19.976	31.2923	0.046387	0.038086	-0.047363	-7.38	62.915349	-5.125	-0.28418	0.18384	0.033203	82.57217	-5.38898	1545.8086	-2.0395	0.75927	-0.32354
3.344	-26.307	14.2276	44.155	0.15723	0.037598	-0.041016	-48.5939	-0.9457	27.2678	0.029785	0.069824	-0.050781	-20.104	2.761	5.5806	-0.26172	0.16455	0.039063	109.306	-27.3395	1571.483	-1.9374	0.77822	-0.3872
3.346	-24.827	21.554	24.69294	0.14771	0.045654	-0.027832	-17.281	41.21	19.0366	0.017823	0.096923	-0.047608	-43.956	56.374	1.2575	-0.23633	0.14307	0.041992	95.352	-18.0344	1538.024	-1.8717	0.76963	-0.44112
3.348	-0.791999999999998	28.512	22.3437	0.14111	0.056152	-0.025879	-19.921	17.1856	16.1282	0.0063477	0.1167	-0.04248	-12.869	29.742	18.5885	-0.22559	0.13672	0.047852	56.752	-21.7651	1531.882	-1.8536	0.7292	-0.47744
3.35	14.712	34.769	28.983	0.13135	0.064453	-0.022461	11.339	25.9635	29.136	-0.0092773	0.14746	-0.041504	-36.303	67.736	-1.7541	-0.19727	0.11865	0.050781	50.3862	5.39	1530.372	-1.8823	0.63721	-0.50195
3.352	-18.864	22.9507	28.9642	0.12207	0.070313	-0.017578	-2.45	27.793	3.509	-0.01709	0.16162	-0.037598	-44.5489	7.122	6.54521	-0.177	0.10742	0.05542	41.203	47.501	1530.61838	-1.9249	0.50049	-0.49834
3.354	-11.69	6.5429	24.8608	0.11328	0.091797	-0.010254	-21.803	-2.5361	25.8383	-0.034668	0.18701	-0.040039	-66.5502	33.067	-3.6909	-0.15625	0.096191	0.0625	11.389	95.626	1513.063	-1.9656	0.34609	-0.48321
3.356	2.446	7.5232	24.5438	0.10206	0.10059	0.0014648	19.257	36.8633	42.485	-0.04541	0.20557	-0.03711	-60.1294	-1.749	18.8437	-0.12598	0.086426	0.064453	8.984	100.236	1470.26593	-2.0047	0.20235	-0.45157
3.358	-4.659	8.167	24.3853	0.091309	0.11865	0.010742	13.961	29.3734	29.0126	-0.053711	0.2251	-0.043457	-68.596	61.3739	40.6299	-0.11475	0.079102	0.070801	-60.88989	96.675	1458.508	-2.0588	0.095022	-0.42969
3.36	7.843	12.33473	29.089	0.083984	0.14307	0.024414	7.259	0.7638	61.559	-0.065918	0.24658	-0.038086	-53.8801	23.1495	56.707	-0.096191	0.068848	0.07373	-84.952	103.295	1457.363	-2.1343	0.024902	-0.41455
3.362	-8.036	22.233	22.7521	0.075684	0.15381	0.026367	25.252	28.7729	48.268	-0.067871	0.25879	-0.036133	-65.624	53.65	42.592	-0.077148	0.064941	0.07373	-74.3062	114.8422	1455.329	-2.2351	0.012793	-0.40293
3.364	5.856	31.139	30.6638	0.07373	0.18115	0.03125	5.207	-4.7129	13.8338	-0.07373	0.27344	-0.031738	-38.7831	8.2368	35.0559	-0.068359	0.054199	0.075195	-62.6562	140.1852	1419.661	-2.3398	0.05625	-0.39248
3.366	-7.225	33.915	24.6138	0.073242	0.20264	0.038086	20.833	9.455543	31.841	-0.077393	0.28247	-0.028809	-65.125	37.067	29.6464	-0.045898	0.04541	0.077637	-64.869	113.928	1375.024	-2.4487	0.15625	-0.39287
3.368	2.174	4.7025	58.3182	0.074707	0.22754	0.037598	21.8683	36.485	12.8661	-0.087402	0.29443	-0.026855	-47.64	13.1752	40.815	-0.036621	0.031983	0.084717	-83.945	110.49	1326.925	-2.5457	0.27851	-0.39902
3.37	-6.957	-27.1098	103.4322	0.079102	0.25195	0.029785	3.129	-8.1576	21.6786	-0.092773	0.30273	-0.022461	-22.245	29.3336	42.829	-0.031738	0.022949	0.084961	-68.3555	140.9601	1296.604	-2.6226	0.40479	-0.40771
3.372	20.436	-53.1576	124.8691	0.085938	0.26172	0.035156	33.761	16.9805	18.4772	-0.095703	0.30518	-0.021973	-6.896	4.8839	20.1407	-0.026367	0.0073242	0.088867	-39.98	155.895	1286.9092	-2.6688	0.52998	-0.42256
3.374	5.85	-47.19	136.198	0.093262	0.27832	0.023438	13.706	-2.0422	-13.973	-0.10596	0.31201	-0.022949	15.712	11.495	15.42065	-0.029785	0.003418	0.09082	-2.524	191.06	1274.107	-2.6847	0.63545	-0.43388
3.376	-33.1856	-24.499	175.8743	0.10108	0.28515	0.0095217	7.292	-6.94381	11.5446	-0.10596	0.3125	-0.024903	44.5449	-5.5411	17.5519	-0.033691	-0.0063477	0.09668	-8.768	158.633	1281.9148	-2.6956	0.71748	-0.46357
3.378	-17.2487	-21.531	254.4059	0.1084	0.28955	-0.013184	26.5146	22.3751	29.796	-0.10986	0.31201	-0.024414	52.557	8.766	39.5743	-0.038818	-0.018311	0.10351	-10.875	145.9515	1243.505	-2.7098	0.77969	-0.51563
3.38	-32.659	-48.869	328.818	0.10791	0.27979	-0.054688	-14.902	-8.4105	32.4055	-0.10352	0.31445	-0.023926	80.0159	9.9266	50.196	-0.04541	-0.022949	0.10889	8.32	151.521	1209.833	-2.7402	0.83398	-0.58789
3.382	-75.323	-69.9709	347.109	0.104	0.27783	-0.077637	-13.225	-9.1777	65.0447	-0.10645	0.31104	-0.021973	67.5115	8.59135	29.8141	-0.052246	-0.03125	0.11621	42.4198	189.63	1184.457	-2.7621	0.8668	-0.64062
3.384	-87.774	-68.2469	358.955	0.082031	0.27197	-0.12744	14.7682	-17.174	72.2066	-0.098145	0.30811	-0.032715	61.165	13.145	19.183	-0.057129	-0.033691	0.12061	65.199	201.025	1155.4515	-2.7468	0.86572	-0.66513
3.386	-67.197	-68.8763	423.519	0.04834	0.27319	-0.16626	-14.897	-72.5632	116.1561	-0.0896	0.29883	-0.041992	62.2155	-12.2142	35.8923	-0.0625	-0.043945	0.12939	36.18219	201.062	1098.1569	-2.7097	0.82705	-0.68506
3.388	-70.783	-64.16995	465.901	0.0043945	0.27295	-0.20068	-4.372	-50.892	180.879	-0.084473	0.2915	-0.051758	52.5089	0.817	10.8319	-0.068848	-0.05127	0.13648	32.9487	185.082	1020.049	-2.6605	0.77578	-0.692
3.39	-69.422	-49.2949	495.265	-0.085449	0.27783	-0.2417	-42.4633	-62.691	252.264	-0.083984	0.27686	-0.084473	49.315	1.5062	26.068	-0.076172	-0.05127	0.14404	35.3408	182.986	975.461	-2.625	0.72852	-0.69629
3.392	-30.045	-27.231	482.554	-0.14307	0.28809	-0.25586	-71.432	-93.377	367.278	-0.089355	0.26611	-0.1001	19.901	20.0336	-19.056	-0.07666	-0.058105	0.16162	67.5361	217.2307	945.815	-2.5938	0.67959	-0.69854
3.394	-3.641	10.3367	509.1892	-0.27588	0.31396	-0.27539	-72.313	-106.439	475.414	-0.11963	0.25342	-0.13232	26.863	-0.0224000000000002	-14.1378	-0.077148	-0.062988	0.16943	81.914	243.135	942.491	-2.5676	0.63867	-0.69863
3.396	-54.312	29.6863	569.357	-0.3855	0.34302	-0.2898	-127.491	-172.5297	529.945	-0.16822	0.24633	-0.15625	-1.141	25.0985	-17.7038	-0.066406	-0.067383	0.18408	73.127	267.283	870.652	-2.5285	0.61523	-0.69942
3.398	-63.2993	61.1546	599.2667	-0.50586	0.37402	-0.27832	-132.847	-159.6928	578.1309	-0.23828	0.24023	-0.17676	9.08	2.67823	6.4151	-0.047607	-0.076904	0.19458	58.786	258.878	815.836	-2.4795	0.60723	-0.70801
3.4	-10.638	75.17304	629.353	-0.66797	0.42188	-0.26367	-119.088	-135.785	607.583	-0.37305	0.22705	-0.2041	11.975	39.793	7.3816	-0.024902	-0.09082	0.20215	17.381	266.731	766.5788	-2.4116	0.60205	-0.72217
3.402	11.971	64.055	655.6244	-0.75391	0.44287	-0.26074	-73.333	-116.718	687.297	-0.44678	0.22803	-0.21582	-3.097	14.9651	24.6101	0.012207	-0.10693	0.21582	37.43086	298.668	751.0833	-2.3339	0.60127	-0.72373
3.404	-30.136	28.787	690.885	-0.91895	0.48535	-0.25195	4.849	-41.518	749.532	-0.62305	0.23242	-0.22656	-33.199	55.237	-6.426	0.034668	-0.12012	0.22021	11.135	307.047	749.177	-2.2601	0.59941	-0.72597
3.406	-44.333	-12.063	740.306	-1.0427	0.51928	-0.25	-1.069	-18.561	731.1363	-0.77808	0.23852	-0.22192	-69.8484	25.7416	-9.6249	0.087402	-0.146	0.21729	12.864	328.088	691.847	-2.1945	0.58613	-0.71817
3.408	-45.6866	-4.304	766.49	-1.1675	0.56299	-0.26074	1.49300000000001	-18.1503	781.8178	-0.94336	0.25342	-0.20898	-73.0291	71.399	-18.4938	0.12451	-0.17017	0.21264	-44.735	276.482	641.941	-2.1427	0.57334	-0.70322
3.41	-22.9512	-4.295	772.873	-1.3359	0.63281	-0.271	7.19600000000001	0.673999999999999	806.43	-1.1895	0.2832	-0.18164	-67.4345	28.219	10.1886	0.16455	-0.19482	0.2085	-95.695	247.174	583.549	-2.1055	0.55469	-0.68848
3.412	-0.721999999999998	-37.595	784.805	-1.4194	0.67432	-0.28467	-30.66	-17.1	812.5717	-1.3198	0.30127	-0.1709	-44.624	64.903	17.2555	0.21924	-0.22949	0.19385	-114.22	221.5599	556.945	-2.0717	0.53594	-0.66016
3.414	37.959	-81.2488	789.766	-1.5898	0.78125	-0.31641	32.662	-41.3717	852.416	-1.5977	0.36523	-0.14111	-51.6618	18.484	32.305	0.24414	-0.24365	0.17969	-113.337	226.983	518.95443	-2.0445	0.51543	-0.63164
3.416	47.07643	-113.427	836.4996	-1.6915	0.86817	-0.33741	65.9007	-57.962	862.759	-1.8843	0.45752	-0.146	-90.1699	51.564	10.205	0.29248	-0.2749	0.16553	-75.28	232.231	471.2106	-2.0129	0.49316	-0.60078
3.418	37.11	-131.854	863.029	-1.7642	0.96143	-0.35693	16.485	-108.964	912.403	-2.0332	0.51367	-0.15186	-69.338	17.76746	26.8126	0.32764	-0.29346	0.15235	-109.028	212.879	413.1414	-1.9823	0.47627	-0.56983
3.42	21.411	-136.3	894.425	-1.792	1.0635	-0.37256	15.894	-108.854	941.097	-2.2754	0.64209	-0.16211	-43.711	52.7918	26.8808	0.35889	-0.30615	0.1416	-129.245	195.473	375.472	-1.9492	0.46045	-0.53711
3.422	30.44	-130.922	931.487	-1.7866	1.0991	-0.38037	28.276	-105.091	916.292	-2.3942	0.75219	-0.16308	-8.317	3.5883	56.668	0.39063	-0.31885	0.12598	-122.891	187.3967	384.768	-1.9059	0.44502	-0.50244
3.424	21.637	-142.857	974.817	-1.7305	1.1426	-0.40039	63.8979	-141.16	939.891	-2.4663	0.86182	-0.16699	5.046	43.3419	46.235	0.40234	-0.3208	0.11865	-91.219	207.033	385.289	-1.8659	0.43487	-0.46738
3.426	2.091	-154.857	987.017	-1.6451	1.1333	-0.39502	112.609	-156.473	984.67	-2.4688	1.0059	-0.19629	19.389	2.3191	29.984	0.4292	-0.31934	0.1123	-72.874	184.605	368.963	-1.8265	0.42666	-0.43808
3.428	-2.621	-156.078	995.704	-1.5542	1.0942	-0.39209	98.492	-189.1184	1027.8238	-2.4272	1.0728	-0.21436	10.994	54.7965	24.7719	0.43555	-0.31396	0.10083	-73.67	186.957	318.024	-1.7812	0.4211	-0.40752
3.43	2.7891	-104.153	1009.351	-1.439	1.0083	-0.37744	109.011	-237.921	1088.331	-2.2871	1.1855	-0.25049	30.5527	16.0556	45.76	0.43994	-0.30908	0.091797	-70.735	161.26	256.936	-1.7319	0.41455	-0.37842
3.432	-12.8986	-73.841	1049.8754	-1.396	0.95557	-0.37158	95.747	-252.278	1101.623	-2.143	1.2251	-0.28125	26.406	37.2526	49.7549	0.43555	-0.28809	0.081055	-87.14	175.175	218.6478	-1.681	0.40225	-0.3418
3.434	-59.726	-56.887	1051.1865	-1.3281	0.83789	-0.34863	40.46	-284.855	1158.429	-1.9995	1.2212	-0.30273	45.67923	-17.06014	58.237	0.43066	-0.2793	0.082031	-18.3223	194.6882	188.541	-1.6309	0.38984	-0.30849
3.436	-64.84	-71.508	1049.8024	-1.2996	0.76489	-0.33887	48.339	-293.231	1240.727	-1.8315	1.1216	-0.32373	58.3908	17.5746	30.446	0.4126	-0.25537	0.075195	3.102	154.802	180.278	-1.5766	0.37227	-0.27841
3.438	-41.985	-74.408	1067.5468	-1.2852	0.70215	-0.33008	20.55	-256.443	1271.232	-1.7578	1.0303	-0.31641	74.745	-4.5391	38.959	0.3916	-0.23389	0.066895	8.4158	130.3312	135.652	-1.5247	0.36006	-0.24658
3.44	-26.429	-91.099	1102.147	-1.2905	0.64014	-0.3374	2.0763	-263.751	1296.1837	-1.6309	0.8125	-0.28711	33.966	21.3062	30.8144	0.37305	-0.20459	0.061035	15.156	80.045	98.4399	-1.4746	0.34375	-0.2168
3.442	-55.0689	-87.618	1142.639	-1.2988	0.61816	-0.34229	20.9817	-216.083	1300.0195	-1.5749	0.64038	-0.25805	45.236	-3.14728	27.70175	0.33691	-0.16992	0.058105	30.0238	96.3854	83.9257	-1.4137	0.33096	-0.1834
3.444	-41.4888	-94.197	1166.02369	-1.3262	0.59961	-0.37012	-22.917	-184.6861	1302.00487	-1.5503	0.48682	-0.23291	42.055	24.3398	6.4784	0.32031	-0.14893	0.051758	60.947	98.081	104.2366	-1.3612	0.32149	-0.14853
3.446	-70.625	-93.916	1186.0814	-1.3565	0.59912	-0.37622	-15.222	-174.62	1351.22	-1.5786	0.33301	-0.21436	42.4228	-11.5647	-1.3623	0.28369	-0.11523	0.044922	99.192	95.966	94.914	-1.305	0.31836	-0.12041
3.448	-94.461	-120.0643	1210.866	-1.3979	0.60986	-0.39014	14.206	-123.493	1346.7235	-1.6191	0.27441	-0.20215	33.607	8.004	-5.593	0.25903	-0.089843	0.040039	103.398	67.592	60.698	-1.252	0.31328	-0.096288
3.45	-89.0496	-142.369	1246.807	-1.478	0.64404	-0.41553	-16.286	-120.827	1373.592	-1.7363	0.20703	-0.1875	30.8636	-4.5338	19.2198	0.23633	-0.060547	0.030762	44.00375	36.4757	13.337	-1.1948	0.31201	-0.072266
3.452	-40.014	-129.4436	1265.592	-1.519	0.66748	-0.4248	2.678	-128.354	1421.9	-1.8503	0.21655	-0.17847	-3.768	18.3933	13.95978	0.20459	-0.022949	0.021973	72.463	53.848	7.994	-1.1371	0.31367	-0.046094
3.454	-25.3589	-118.203	1277.608	-1.6245	0.729	-0.45752	-15.416	-103.763	1413.798	-1.9819	0.2666	-0.18213	-11.467	8.91996	3.9475	0.19678	-0.0063477	0.01123	46.6612	52.483	59.312	-1.0757	0.31807	-0.020605
3.456	-51.131	-107.7156	1278.004	-1.7036	0.77636	-0.47558	-47.0043	-119.4787	1455.035	-2.1738	0.41309	-0.2168	-24.415	3.3553	-11.7718	0.17383	0.027832	0.0014648	47.844859	61.23	46.507	-1.0136	0.32002	-0.0014648
3.458	-54.764	-110.85	1307.22	-1.7793	0.82422	-0.49609	-2.822	-112.9682	1473.705	-2.2656	0.50293	-0.24512	-37.104	-0.900399999999999	-3.7957	0.15723	0.054443	-0.017822	43.7657	41.129	30.132	-0.94961	0.32031	0.011523
3.46	-54.9082	-109.655	1325.989	-1.8765	0.88721	-0.51123	-64.6923	-105.759	1482.724	-2.439	0.69287	-0.2793	-51.531	22.06863	4.0482	0.14355	0.081543	-0.023926	-1.719	33.6239	-15.2317	-0.88232	0.32568	0.026367
3.462	-26.379	-75.548	1329.088	-1.9219	0.91602	-0.52441	-82.303	-165.711	1526.511	-2.541	0.83887	-0.29394	-44.3533	41.056	-1.591444	0.13135	0.11865	-0.033691	-24.8783	14.4592	-14.12	-0.81475	0.31553	0.032129
3.464	-28.0058	-53.943	1339.738	-2.0117	0.97461	-0.54102	-24.604	-147.4764	1530.246	-2.6245	0.97412	-0.30957	-51.259	46.5125	-10.8056097	0.12061	0.13965	-0.037598	-36.687	13.994	22.4939	-0.74678	0.30635	0.036133
3.466	-11.38448	-35.153	1326.977	-2.0859	1.0293	-0.54346	-24.2337	-145.2874	1544.609	-2.7124	1.1157	-0.3374	-67.19	50.397	0.10964	0.099121	0.18213	-0.049316	-34.275	30.7532	45.581	-0.68271	0.29619	0.049805
3.468	-36.579	-27.157	1299.0984	-2.1191	1.0503	-0.5498	14.0891	-158.628	1590.172	-2.7358	1.1685	-0.35107	-69.2544	23.21802	-2.58215	0.085694	0.20874	-0.052978	-49.0031	19.1932	28.6783	-0.6251	0.28564	0.061035
3.47	-39.494	-2.577	1313.1382	-2.1812	1.1079	-0.56104	31.294	-107.26	1569.934	-2.7832	1.2363	-0.38232	-56.4347	22.7652	-6.5052	0.075195	0.23535	-0.060059	-23.9746	20.7064	7.7239	-0.57275	0.27197	0.071289
3.472	-29.017	9.8505	1331.0423	-2.2138	1.1431	-0.57251	-15.2911	-129.769	1560.6602	-2.8133	1.2796	-0.40674	-39.094	25.3326	30.5971	0.061035	0.27295	-0.058594	-89.28	0.2262	8.311	-0.52178	0.25771	0.07168
3.474	-17.591124	4.7241	1336.46843	-2.2397	1.1802	-0.57959	37.328	-96.057	1565.3949	-2.8276	1.3071	-0.42041	-22.581	49.358	46.3778	0.053711	0.2876	-0.064453	-93.425	24.8249	32.7422	-0.47617	0.24551	0.074219
3.476	-19.1518	-11.1655	1350.2809	-2.2554	1.2231	-0.5874	27.859	-36.058	1517.778	-2.8535	1.3145	-0.42285	-22.31	11.388	95.466	0.041504	0.32275	-0.063965	-63.2337	36.666	55.522	-0.43399	0.22832	0.071485
3.478	-34.7	-21.6819	1344.374	-2.2573	1.2407	-0.59229	11.617	-61.51	1538.1258	-2.855	1.3149	-0.41553	-8.823	5.712	80.2921	0.027099	0.3479	-0.063477	-71.058	36.873	47.272	-0.39287	0.21328	0.065821
3.48	-30.399	-38.1888	1355.663	-2.2593	1.2642	-0.59424	60.776	-17.681	1530.022	-2.8589	1.3013	-0.4126	-15.345	-36.111	121.664	0.02002	0.36865	-0.060059	-53.265	15.2839	22.9868	-0.354	0.19678	0.064453
3.482	-43.609	-46.9091	1370.64	-2.254	1.2744	-0.5874	0.0598999999999998	-9.299	1514.6652	-2.8552	1.2922	-0.40454	-0.928000000000001	-0.382999999999996	186.1057	-0.0024414	0.39551	-0.05957	-73.754	-7.569	31.2203	-0.32119	0.18252	0.061523
3.484	-62.638	-43.7867	1358.5267	-2.2476	1.2778	-0.58301	2.8614	-24.5772	1536.933	-2.8477	1.2813	-0.39648	37.351	-29.51	318.575	-0.0097656	0.40625	-0.058105	-54.037	-13.727	34.2051	-0.29785	0.17383	0.062402
3.486	-36.695	-35.78335	1354.5429	-2.2378	1.27	-0.57568	16.0423	46.642	1501.366	-2.8301	1.2617	-0.38574	12.134	-37.419	399.747	-0.033691	0.43604	-0.057617	-36.504	0.654	41.425	-0.27598	0.16797	0.054199
3.488	-50.577	-39.766	1342.704	-2.2358	1.2583	-0.5708	3.652	24.109	1502.015	-2.814	1.2583	-0.37842	-17.2157	-107.7513	501.44	-0.049073	0.45142	-0.05542	29.339	23.7844	25.779	-0.26621	0.15713	0.053613
3.49	-65.74	-24.1581	1334.093	-2.2246	1.2383	-0.5625	42.697	29.328	1506.1256	-2.7808	1.2544	-0.37256	-54.6241	-92.628	588.839	-0.066406	0.46875	-0.054688	35.664	5.1553	15.8397	-0.25342	0.15625	0.04541
3.492	-94.227	-15.2685	1351.694	-2.2244	1.2264	-0.55127	-15.244	49.751	1460.9315	-2.7527	1.2512	-0.36866	-95.4945	-104.406	697.10926	-0.089844	0.48877	-0.049805	28.9874	6.7895	-5.5306	-0.24512	0.15361	0.047852
3.494	-70.566	-17.3833	1339.7446	-2.2163	1.2095	-0.53369	-30.8357	-23.777	1485.9203	-2.7266	1.2529	-0.36621	-83.6991	-61.432	750.353	-0.093262	0.49561	-0.052734	63.84499	-10.0078	2.4812	-0.23037	0.15049	0.056055
3.496	-87.448	-22.53831	1331.512	-2.2202	1.186	-0.521	15.5916	2.238	1500.857	-2.6875	1.248	-0.35156	-54.5921	-75.096	787.884	-0.10449	0.51172	-0.057617	65.8787	10.7779	37.8878	-0.21123	0.14346	0.062304
3.498	-96.823	7.48	1298.0279	-2.2183	1.1763	-0.51025	-24.4326	-3.209	1485.16946	-2.6655	1.2427	-0.3457	-16.1412	-45.029	803.398	-0.10962	0.52564	-0.063721	97.083	26.7462	25.809	-0.19521	0.14053	0.065625
3.5	-103.164	29.7614	1274.8515	-2.2026	1.1646	-0.49854	-20.2401	-23.8266	1495.3152	-2.6309	1.2188	-0.33691	43.254	-114.195	867.509	-0.11377	0.52783	-0.074219	70.586	-0.9504	20.548	-0.18311	0.13672	0.066895
3.502	-91.486	68.854	1262.2783	-2.1921	1.1467	-0.4895	-30.1691	55.1302	1460.369	-2.5952	1.1968	-0.32446	51.448	-85.1903	874.357	-0.11865	0.53467	-0.10645	73.9194	18.9084	-22.701	-0.17304	0.13369	0.07002
3.504	-77.001	74.939	1260.4321	-2.1714	1.1294	-0.47803	-84.098	40.9025	1424.9354	-2.5542	1.1704	-0.31006	37.682	-103.483	947.254	-0.12402	0.53174	-0.12988	52.2438	13.144	-2.333	-0.16592	0.13213	0.07334
3.506	-101.886	60.993	1263.0058	-2.1504	1.1064	-0.46387	-26.775	64.7039	1438.39	-2.4922	1.127	-0.29297	11.208	-64.23	930.45313	-0.14746	0.53467	-0.19043	65.632	51.728	24.1977	-0.15537	0.12705	0.07959
3.508	-91.485	42.664	1255.9683	-2.1348	1.0908	-0.45898	-73.625	91.455	1404.295	-2.4609	1.1016	-0.2832	11.866	-101.235	942.667	-0.18848	0.53174	-0.23535	73.093	35.12	32.20886	-0.14258	0.12861	0.081348
3.51	-95.799	31.7633	1250.167	-2.1035	1.0566	-0.44824	-85.778	21.2836	1406.115	-2.396	1.0474	-0.26514	20.119	-133.838	925.22798	-0.23926	0.5293	-0.26807	46.6158	27.34007	21.515	-0.12988	0.12354	0.09668
3.512	-58.362	42.009	1234.532	-2.0759	1.0423	-0.43384	-19.4806	75.169	1387.27	-2.3464	1.0168	-0.24975	16.509	-195.8413	945.95	-0.34277	0.52979	-0.30518	35.43	21.091	-16.934	-0.12539	0.11358	0.095508
3.514	-52.544	38.41	1230.379	-2.0503	1.0181	-0.42334	-77.909	81.339	1334.629	-2.3027	0.97461	-0.24316	12.943	-190.837	988.6494	-0.43652	0.54492	-0.3374	-4.494	29.1095	-1.085	-0.11474	0.1044	0.10898
3.516	-44.968	34.3674	1214.687	-2.0234	0.99023	-0.41699	-23.296	80.488	1323.372	-2.2227	0.93555	-0.2207	-14.031	-185.128	1041.2165	-0.62695	0.57617	-0.37109	4.48	41.622	22.0122	-0.11006	0.091895	0.12656
3.518	-29.7547	32.92573	1189.6293	-2.0098	0.97461	-0.41064	-8.402	148.642	1271.4727	-2.1753	0.91162	-0.21436	8.19799999999999	-132.05	1035.042	-0.79443	0.60132	-0.38428	-10.378	37.8128	44.124	-0.10635	0.078711	0.14121
3.52	-36.819	23.7878	1149.792	-1.9727	0.95703	-0.40137	-34.386	108.965	1227.659	-2.0957	0.86816	-0.20117	27.886	-175.982	1081.8242	-0.97803	0.63623	-0.38916	-36.025	34.2078	16.8222	-0.10742	0.063477	0.16113
3.522	-25.601	45.1205	1145.1052	-1.9453	0.93994	-0.39819	19.7489	113.482	1230.4559	-2.0232	0.84106	-0.19824	68.127	-206.5243	1098.027	-1.2495	0.70264	-0.37354	-71.452	13.8034	12.6739	-0.11904	0.048145	0.18252
3.524	-23.66423	56.969	1153.841	-1.9175	0.92334	-0.38916	-7.6408	124.614	1200.361	-1.9526	0.81689	-0.20068	81.347	-257	1169.027	-1.4009	0.73877	-0.35693	-71.696	38.754	21.62771	-0.1292	0.030176	0.1999
3.526	5.7356	71.911	1152.688	-1.8789	0.90186	-0.37891	-15.9636	68.701	1225.867	-1.8613	0.77344	-0.18945	92.593	-264.265	1215.2675	-1.7515	0.82959	-0.3208	-72.739	43.334	48.946	-0.13428	0.016895	0.21865
3.528	-8.496	78.801	1117.81	-1.8555	0.89063	-0.37305	34.7626	99.5559	1212.452	-1.8218	0.75635	-0.18896	75.957	-269.497	1253.395	-2.0466	0.91431	-0.29541	-83.9136	22.362	59.794	-0.13643	0.00048826	0.23711
3.53	-25.343	88.315	1080.5309	-1.8101	0.86377	-0.36182	11.847	96.231	1147.943	-1.7422	0.7168	-0.17725	34.563	-255.5307	1273.54	-2.3276	1.0083	-0.25977	-54.9188	17.0812	38.5747	-0.13525	-0.011719	0.24854
3.532	-19.8738	94.888	1065.785	-1.7751	0.84594	-0.35572	36.555	60.702	1119.2246	-1.6844	0.68848	-0.17041	37.531	-239.9793	1309.984	-2.6387	1.1426	-0.20459	-85.0098	-14.0699	29.9438	-0.12646	-0.030469	0.25381
3.534	-4.7561	106.834	1050.973	-1.7437	0.83154	-0.34912	42.5421	127.3309	1066.1767	-1.6323	0.65869	-0.16016	62.955	-233.2	1326.7317	-2.7461	1.2168	-0.18311	-65.162	9.23269	25.9523	-0.10674	-0.047461	0.25283
3.536	-3.3226	123.571	1021.9445	-1.6895	0.80469	-0.3418	-3.14	93.752	1039.2069	-1.562	0.61182	-0.15674	69.6278	-220.009	1377.888	-2.8218	1.3188	-0.15088	-34.8793	3.2826	47.429	-0.084082	-0.064649	0.25479
3.538	-40.825	114.229	1002.1957	-1.6602	0.7959	-0.33887	64.3031	121.3385	1037.159	-1.521	0.59229	-0.15381	65.37181	-183.6582	1411.1	-2.769	1.3677	-0.14551	-29.344	10.5443	29.9824	-0.053808	-0.083985	0.25567
3.54	-36.649	107.1967	964.4139	-1.6069	0.76807	-0.32959	51.751366	159.582	971.8885	-1.4507	0.55127	-0.14502	25.031	-148.494	1422.044	-2.6523	1.3711	-0.16504	-30.853	-9.8626	18.7627	-0.013184	-0.10156	0.25732
3.542	-54.3799	93.5154	952.6141	-1.5625	0.75	-0.32374	31.741	97.0055	957.5357	-1.3994	0.52343	-0.13965	27.853	-83.577	1437.97885	-2.418	1.291	-0.19141	11.858	-3.35	5.8705	0.025977	-0.12343	0.25069
3.544	-50.0253	105.391	935.173	-1.5132	0.72705	-0.31982	75.245	145.5586	912.692	-1.3452	0.49854	-0.13379	41.608	-57.93	1443.1273	-2.1406	1.103	-0.21753	33.3042	16.7179	6.287	0.067773	-0.14648	0.24141
3.546	-53.643	105.186	935.459	-1.4585	0.70361	-0.31152	-11.584	136.6767	859.5921	-1.271	0.46631	-0.12256	58.479	-37.808	1477.776	-1.7832	0.87305	-0.24805	21.921	17.2889	30.2342	0.11543	-0.16679	0.23398
3.548	-53.108	109.111	911.535	-1.4238	0.68848	-0.30469	18.1	128.5457	862.0263	-1.2344	0.4502	-0.12402	40.252	-64.859	1512.409	-1.5	0.7998	-0.26074	55.7664	18.2297	28.0552	0.16738	-0.19395	0.22598
3.55	-57.364	98.092	889.109	-1.3652	0.65625	-0.29492	37.693	182.763	820.289	-1.1641	0.41504	-0.1167	-8.176	-65.537	1523.5177	-1.5859	0.81592	-0.27441	64.87504	1.9278	35.3069	0.22363	-0.22119	0.22266
3.552	-59.4679	104.487	864.91	-1.3279	0.62915	-0.281	-29.703	134.5342	777.644	-1.1081	0.38843	-0.11255	-42.052	-79.213	1528.644	-1.9102	0.8291	-0.20947	64.589	7.0484	12.3717	0.27363	-0.25176	0.21777
3.554	-51.98	102.166	844.363	-1.2866	0.604	-0.27441	19.036	163.9947	730.0861	-1.0532	0.36572	-0.10498	-18.1905	-88.137	1562.931	-2.0351	0.83837	-0.14502	87.226	13.6374	-1.884	0.31416	-0.28096	0.20586
3.556	-66.9094	112.228	833.582	-1.2349	0.57471	-0.25928	-24.036	194.805	675.403	-0.98389	0.32666	-0.091309	-36.9917	-98.4291	1577.8608	-2.0762	0.83594	-0.14453	70.0788	34.9561	-0.539999999999999	0.36143	-0.304	0.20274
3.558	-50.2839	115.614	809.422	-1.2129	0.55664	-0.25488	-29.831	166.082	670.5783	-0.94727	0.30957	-0.092285	-21.309	-99.1899	1606.576	-1.9951	0.76953	-0.2168	78.0921	35.977	-1.83	0.39395	-0.33194	0.1961
3.56	-42.4946	118.861	778.4912	-1.1621	0.52539	-0.24023	16.815	213.272	649.393	-0.87988	0.27344	-0.083008	-44.081	-124.6865	1572.397	-1.9492	0.66699	-0.21484	71.1351	25.676	15.3136	0.42236	-0.34717	0.18701
3.562	-47.3378	121.546	749.599	-1.1242	0.50219	-0.23389	-28.649	167.959	605.004	-0.82813	0.25	-0.077149	-41.695	-117.0316	1585.946	-1.9121	0.63574	-0.24023	73.046	26.6152	0.0170000000000001	0.45547	-0.3626	0.18789
3.564	-49.1807	124.744	731.384	-1.0898	0.4834	-0.22559	4.278	135.7263	593.5681	-0.77588	0.22705	-0.074707	-61.652	-118.85	1614.339	-1.939	0.7124	-0.25684	32.8935	3.766	0.2789	0.46992	-0.37471	0.18428
3.566	-8.637	125.973	710.953	-1.0352	0.45996	-0.21582	-6.953	162.728	558.5312	-0.70654	0.19629	-0.074219	-52.141	-96.067	1620.597	-1.9824	0.7666	-0.23242	44.5864	34.075	31.37	0.48477	-0.38057	0.18193
3.568	-8.865	127.281	695.8	-1.0073	0.45361	-0.21729	-43.0585	126.9038	540.8984	-0.67334	0.18799	-0.071289	-49.711	-84.204	1605.066	-2.0898	0.80078	-0.26807	2.543	19.428	57.456	0.49346	-0.38232	0.17246
3.57	-24.426	119.871	654.5695	-0.95313	0.42627	-0.20898	4.616	161.492	518.2159	-0.60107	0.1543	-0.066895	-15.066	-57.906	1608.64	-2.1519	0.81689	-0.31299	-7.484	7.986	79.3674	0.45703	-0.37695	0.14355
3.572	-5.968	118.6185	616.4302	-0.91382	0.40918	-0.20948	-7.492	186.371	449.649	-0.54761	0.13111	-0.064697	-38.977	-23.5001	1576.757	-2.2729	0.85693	-0.36523	11.924	-15.441	77.7562	0.44551	-0.32861	0.13847
3.574	24.096	124.6533	601.2718	-0.87061	0.39697	-0.20557	-3.326	146.939	441.2347	-0.49463	0.10254	-0.059082	-30.972	10.4363	1557.638	-2.3325	0.90527	-0.38452	-59.38978	-43.96	105.335	0.46943	-0.29561	0.14541
3.576	30.944	124.7613	609.833	-0.81641	0.37012	-0.19238	33.617	171.001	412.388	-0.43506	0.063965	-0.065918	-25.811	33.81	1515.98	-2.373	0.95898	-0.40625	-60.1448	-48.419	159.375	0.49717	-0.26904	0.14619
3.578	12.512	124.881	586.373	-0.78662	0.36377	-0.19043	6.939	135.577	391.6549	-0.41113	0.041992	-0.056641	7.622	42.4643	1537.2631	-2.3843	1.02	-0.44238	-60.596	-84.916	226.191	0.50703	-0.23769	0.12656
3.58	28.562	124.69	544.6347	-0.73535	0.32813	-0.18115	49.083	122.4532	390.746	-0.3623	0.0097656	-0.046875	-6.568	47.3	1549.794	-2.3711	1.0391	-0.46484	-75.627	-100.325	252.041	0.50195	-0.20068	0.098145
3.582	40.4083	122.466	527.421	-0.69898	0.30688	-0.17309	53.6928	158.15	363.502	-0.333	-0.010987	-0.040283	13.36	55.746	1527.464	-2.3242	1.0469	-0.50049	-97.158	-122.315	300.024	0.47441	-0.15332	0.072949
3.584	11.325	103.613	526.606	-0.66357	0.28467	-0.16504	31.212	127.906	328.3994	-0.2959	-0.033203	-0.036133	31.412	82.93756	1484.724	-2.2857	1.0678	-0.52198	-106.558	-107.4875	354.554	0.42588	-0.10576	0.049316
3.586	17.404	90.5235	503.929	-0.62256	0.25732	-0.15479	59.5936	139.358	294.8097	-0.25244	-0.062988	-0.038086	22.405	102.6768	1469.967	-2.2734	1.1074	-0.53125	-102.772	-57.5206	482.028	0.37236	-0.062012	0.03291
3.588	30.309	97.7101	464.0125	-0.60156	0.24609	-0.14746	32.853	152.663	247.4512	-0.23486	-0.072754	-0.040039	5.659	105.681	1448.896	-2.334	1.1602	-0.52832	-105.025	18.679	615	0.30293	-0.018457	0.011328
3.59	44.7881	109.5449	441.0853	-0.5625	0.22168	-0.13867	51.462	116.636	267.093	-0.19531	-0.09082	-0.038574	-11.259	91.9445	1454.288	-2.3804	1.1782	-0.52295	-62.504	73.425	735.86	0.229	0.035645	0.010742
3.592	-1.548	100.1101	423.0714	-0.52808	0.20874	-0.13013	84.1839	146.036	242.024	-0.16797	-0.10717	-0.043213	48.6202	84.099	1434.1253	-2.4546	1.2036	-0.51709	-82.189	71.153	863.0648	0.15694	0.10049	0.014551
3.594	-20.173	88.2442	409.195	-0.49512	0.19482	-0.12988	30.4455	127.545	216.3574	-0.14453	-0.12305	-0.044922	26.5655	75.353	1471.702	-2.4851	1.2141	-0.51196	-73.608	56.462	962.7237	0.077637	0.13545	-0.015136
3.596	-20.826	94.2532	383.547	-0.45313	0.1709	-0.11035	41.992	107.876	202.038	-0.12451	-0.13721	-0.050781	57.7838	100.085	1484.985	-2.4937	1.2212	-0.50732	-81.03	17.4634	1066.99	0.013574	0.18505	-0.028418
3.598	0.553999999999995	110.141	370.82517	-0.43555	0.16064	-0.1123	36.708	110.2942	178.744	-0.11572	-0.14404	-0.047852	8.795	108.772	1474.861	-2.4785	1.2129	-0.49121	-40.6357	5.57899999999999	1143.862	-0.039648	0.23789	-0.030762
3.6	-15.84	109.34	356.453	-0.39795	0.13965	-0.11035	19.185	79.4405	186.921	-0.10986	-0.1416	-0.068359	21.915	141.149	1402.402	-2.4702	1.2036	-0.47998	-30.5894	-22.297	1148.502	-0.083984	0.28662	-0.04248
3.602	-28.625	90.6701	336.43	-0.37427	0.12671	-0.10767	48.9856	87.144518	175.839	-0.10815	-0.13819	-0.059815	-4.56	139.3291	1374.9793	-2.4707	1.1924	-0.44629	18.5655	-73.192	1104.667	-0.12383	0.33242	-0.044922
3.604	-30.638	101.1408	303.7704	-0.34326	0.11719	-0.10205	6.676	96.285	139.25	-0.084961	-0.13818	-0.04248	20.071	163.483	1338.781	-2.4705	1.1882	-0.43408	73.57	-121.04	1029.532	-0.15029	0.37402	-0.047754
3.606	-32.163	110.571	304.6108	-0.32666	0.10986	-0.11963	-1.95	63.3742	136.626	-0.054199	-0.15234	-0.025879	-11.694	176.242	1354.385	-2.4707	1.1787	-0.41943	66.886	-172.314	969.639	-0.17568	0.4123	-0.051269
3.608	-40.7149	97.137	274.3815	-0.32471	0.10742	-0.12891	6.051	74.0693	119.089	-0.047852	-0.15283	-0.015625	25.693	201.576	1309.594	-2.4688	1.168	-0.39648	110.7764	-201.291	968.327	-0.20342	0.44834	-0.0625
3.61	-45.8186	81.421	256.90439	-0.2876	0.10791	-0.104	-39.028	57.804	83.66521	-0.030762	-0.14404	-0.016113	-21.3478	200.481	1283.846	-2.459	1.1621	-0.39111	124.266	-223.074	971.442	-0.22656	0.4834	-0.069824
3.612	-28.234	98.405	253.0463	-0.23828	0.080322	-0.080566	-18.889	37.3953	82.1239	-0.020508	-0.14087	-0.015137	-26.244	208.498	1239.9526	-2.4351	1.1587	-0.36963	131.677	-255.866	995.44	-0.23955	0.51455	-0.078125
3.614	-23.833	90.262	246.709	-0.19873	0.061035	-0.065918	-5.801	60.834	53.5123	-0.015137	-0.1333	-0.018555	-73.714	192.8121	1227.4703	-2.404	1.1496	-0.36059	86.38	-268.601	999.1784	-0.25244	0.53623	-0.078614
3.616	-25.653	81.676	241.233	-0.16162	0.02832	-0.064453	-52.61348	23.2984	67.124	0	-0.12354	-0.018066	-30.559	235.442	1174.033	-2.3633	1.1475	-0.3457	76.1772	-261.422	1042.479	-0.2583	0.55537	-0.080176
3.618	-15.742	72.533	222.3785	-0.15186	0.021484	-0.069336	-9.534	29.337	71.063	0.0078125	-0.11914	-0.02002	-28.102	234.0264	1163.129	-2.291	1.1367	-0.33154	67.6761	-243.052	1100.104	-0.2627	0.56641	-0.079101
3.62	5.895	65.525	220.18126	-0.12744	0.012695	-0.069336	-43.8128	42.8241	39.6085	0.028809	-0.10986	-0.021484	-5.521	247.063	1120.017	-2.2603	1.1274	-0.32178	33.9513	-221.303	1140.5077	-0.26904	0.56689	-0.08252
3.622	1.497	52.641	213.3209	-0.11695	0.0041504	-0.074463	-41.0319	13.2628	51.0419	0.049805	-0.10889	-0.023438	-45.934	210.4969	1123.205	-2.1909	1.1021	-0.30225	24.6554	-188.98	1172.519	-0.27217	0.55967	-0.08291
3.624	-23.695	42.3202	195.0683	-0.10303	-0.0014648	-0.072266	-0.844999999999999	38.1765	28.95376	0.070801	-0.10645	-0.024902	-32.289	211.616	1060.81	-2.1424	1.0813	-0.28516	-5.363	-192.02	1189.99202	-0.27549	0.54424	-0.09209
3.626	14.129	57.5146	181.4072	-0.074219	-0.0053711	-0.06543	-48.175	22.2542	9.1115	0.094727	-0.10742	-0.023926	-22.216	188.235	1039.019	-2.0977	1.0527	-0.27051	22.1685	-163.073	1225.217	-0.27198	0.52588	-0.095215
3.628	47.81229	65.767	183.898	-0.065918	-0.010254	-0.061523	-4.773	20.5435	6.6977	0.11182	-0.10987	-0.020996	12.603	195.467	980.7732	-2.0352	1.0156	-0.24561	0.427	-200.738	1275.984	-0.27763	0.50381	-0.10322
3.63	26.177	62.04	176.213	-0.038574	-0.014648	-0.060547	1.352	46.575	-16.2686	0.12646	-0.11523	-0.019043	6.864	191.5682	944.719	-2.0078	1	-0.23389	20.28	-257.8836	1334.28	-0.28516	0.47656	-0.11523
3.632	3.923	64.749	153.1109	-0.023926	-0.016113	-0.0625	-11.4198	0.818000000000001	4.43657	0.14258	-0.12207	-0.010254	34.932	209.13	895.874	-1.9453	0.95898	-0.21875	-50.9545	-309.585	1354.707	-0.30147	0.44668	-0.12295
3.634	29.1	67.381	122.3017	-0.0078125	-0.021973	-0.064453	30.2927	-0.521000000000001	29.097	0.15186	-0.12305	-0.0073242	19.714	210.2	856.508	-1.8945	0.93505	-0.20068	-98.037	-360.165	1393.944	-0.32793	0.41543	-0.13408
3.636	57.157322	70.645	128.7807	0.020996	-0.023438	-0.061523	6.938	9.1462	14.0703	0.15674	-0.12842	-0.0019531	49.653	220.2792	807.4351	-1.8423	0.91064	-0.19189	-132.645	-340.946	1440.139	-0.36543	0.38262	-0.14228
3.638	11.431	75.185	138.7828	0.031738	-0.027832	-0.05957	23.379	-8.74294	14.692	0.15674	-0.13574	0.0019531	41.096	218.762	766.1941	-1.7598	0.87695	-0.18555	-134.599	-316.306	1496.442	-0.41963	0.35693	-0.1499
3.64	11.956	60.4334	128.1065	0.054199	-0.038574	-0.056152	48.1105	31.0523	-0.298500000000001	0.15625	-0.13721	0.0073242	44.728	227.2558	727.311	-1.7148	0.86133	-0.17773	-102.328	-243.725	1529.642	-0.48926	0.33203	-0.16064
3.642	26.935	66.735	97.682	0.065186	-0.045655	-0.058594	0.325000000000003	33.3595	0.0389999999999997	0.1543	-0.14355	0.017578	45.518	245.4224	667.088	-1.6299	0.82813	-0.17383	-104.264	-215.444	1545.0727	-0.58262	0.30898	-0.17754
3.644	22.085	70.616	87.8242	0.079102	-0.050781	-0.057129	43.893	15.1677	14.2124	0.15283	-0.14551	0.022949	75.9225	252.532	635.911	-1.5603	0.80444	-0.17115	-81.189	-177.387	1547.4314	-0.69404	0.29346	-0.1918
3.646	-12.124	64.254	104.833	0.09668	-0.058105	-0.054199	48.9504	23.724	1.4824	0.14551	-0.14111	0.03125	61.325	258.417	580.7228	-1.4917	0.77393	-0.16553	-86.862	-149.1951	1570.15	-0.82881	0.28447	-0.19844
3.648	0.207000000000001	52.902	91.733	0.10596	-0.061768	-0.057129	0.633000000000001	-2.716	-4.5616	0.13965	-0.13989	0.038574	60.2737	240.404	548.684	-1.4019	0.73096	-0.15527	-42.32	-111.986	1606.779	-0.97851	0.28418	-0.1917
3.65	8.466	63.575	74.8406	0.10889	-0.066406	-0.055176	26.6782	16.1287	16.0596	0.12891	-0.13574	0.050781	61.088	239.617	495.374	-1.355	0.70947	-0.15479	-22.2952	-77.67	1617.568	-1.1406	0.28223	-0.17236
3.652	-16.071	71.31	75.0396	0.11475	-0.07373	-0.054199	18.811	43.822	-8.88097	0.11621	-0.12646	0.060547	74.0997	228.764	450.483	-1.271	0.65088	-0.14746	3.6402	-83.287	1606.171	-1.3249	0.28994	-0.14776
3.654	-21.965	49.689	83.299	0.12109	-0.075195	-0.054688	22.224	28.3132	19.7253	0.1123	-0.12207	0.057617	37.699	258.409	422.722	-1.2253	0.58862	-0.13476	2.7897	-72.179	1569.1616	-1.5155	0.29892	-0.1206
3.656	-19.826	25.1591	81.771	0.12646	-0.080078	-0.058594	30.831	56.519	11.2304	0.096191	-0.11523	0.06543	50.3	260.472	416.028	-1.1616	0.57178	-0.146	-13.30979	-100.6083	1570.36	-1.7097	0.30556	-0.097558
3.658	-32.349	38.196	79.238	0.12891	-0.084961	-0.054688	-8.862	39.409	7.154	0.091552	-0.10888	0.066162	46.009	262.141	374.524	-1.0649	0.56494	-0.14795	-11.9752	-73.0745	1562.675	-1.8881	0.32422	-0.076465
3.66	-33.097	40.795	57.5559	0.13037	-0.089844	-0.050781	6.366	19.0295	25.7964	0.086426	-0.10303	0.067871	42.241	218.374	369.171	-1.0117	0.54102	-0.14063	-33.2834	-89.031	1569.985	-2.062	0.34619	-0.068359
3.662	-41.473	40.397	57.242	0.13525	-0.095703	-0.055664	-4.657	47.399	17.5927	0.077148	-0.1001	0.064453	9.809	199.048	321.898	-0.91553	0.50342	-0.1499	17.58664	-81.7587	1587.967	-2.2108	0.39072	-0.049707
3.664	-29.931	38.24	54.446	0.13672	-0.09375	-0.052734	-35.3795	22.275	33.5886	0.079102	-0.097656	0.062012	-21.493	172.8924	327.1603	-0.84595	0.46484	-0.15576	5.612	-86.429	1592.7275	-2.3293	0.45136	-0.034766
3.666	-29.171	49.297	56.267	0.13379	-0.090332	-0.05957	0.282	32.2442	23.13993	0.079102	-0.092285	0.059082	-13.954	195.169	295.3671	-0.77051	0.42676	-0.16113	7.3422	-105.766	1593.612	-2.4309	0.52636	-0.0007812
3.668	-30.443	41.507	55.522	0.12964	-0.088379	-0.067383	-42.987	35.5095	8.0352	0.081543	-0.09253	0.054443	-29.112	175.506	293.197	-0.67529	0.3833	-0.16064	52.368	-57.553	1587.922	-2.5324	0.60899	0.032715
3.67	-25.434	37.215	32.26152	0.12305	-0.089355	-0.074219	-26.247	3.128	21.7371	0.080078	-0.089355	0.052734	-11.585	185.954	243.0168	-0.63672	0.35449	-0.15918	77.465	-44.2839	1592.779	-2.6304	0.6958	0.049805
3.672	0.292999999999999	46.6	38.5432	0.11182	-0.084961	-0.066895	-16.919	23.734	30.645	0.07666	-0.09668	0.039551	-15.255	128.5717	241.872	-0.55225	0.31299	-0.15479	52.966	11.386	1591.2991	-2.7256	0.77618	0.059961
3.674	-0.00800000000000267	46.369	51.696	0.10693	-0.078613	-0.074707	-59.384	29.2218	36.349	0.074707	-0.098633	0.039063	-20.091	146.907	190.0093	-0.49683	0.27856	-0.15479	18.1595	30.639	1560.173	-2.819	0.85283	0.046094
3.676	-9.518	29.76	50.062	0.083496	-0.070313	-0.071289	-2.745	19.3779	50.615	0.074707	-0.10107	0.029297	-26.054	123.426	182.719	-0.44629	0.24854	-0.15088	-17.8002	49.6507	1516.2386	-2.8894	0.91846	0.025
3.678	-7.547	30.892	31.6925	0.062988	-0.060791	-0.070556	-13.539	30.354	36.0729	0.062011	-0.095948	0.030029	-6.39	143.556	144.097	-0.38086	0.2002	-0.15381	-40.5837	62.044	1497.847	-2.9113	0.97344	0.0088864
3.68	21.057	39.097	27.6488	0.04541	-0.05127	-0.071289	-35.057	2.167	42.728	0.057129	-0.099609	0.027832	-3.215	117.8774	155.524	-0.34668	0.17773	-0.15234	-51.087	82.166	1497.551	-2.8906	0.99805	-0.00097656
3.682	34.185	32.085	34.9571	0.011719	-0.036133	-0.062012	18.025	3.9331	38.3885	0.041016	-0.093262	0.026855	-0.301000000000002	114.936	126.3476	-0.28125	0.12793	-0.14453	-60.941	79.13	1491.0269	-2.8588	0.98965	-0.022265
3.684	7.873	34.621	38.438	0.00048828	-0.026855	-0.058594	-9.42	28.6421	3.2117	0.038086	-0.091309	0.025391	-14.671	76.6381	99.7563	-0.23559	0.0896	-0.13818	-71.157	64.5823	1437.9677	-2.8304	0.96182	-0.050781
3.686	29.785	28.1911	28.2752	-0.035156	-0.0073242	-0.052246	-11.221	9.016	21.3531	0.019531	-0.083496	0.021484	2.16	77.093	70.9921	-0.18701	0.047852	-0.13379	-96.543	69.927	1404.264	-2.8132	0.91259	-0.079297
3.688	33.546	22.5376	17.7097	-0.055908	0.00708	-0.047363	20.219	34.3938	20.4288	0.0085451	-0.076905	0.027832	-14.723	56.663	95.458	-0.14307	0.003418	-0.12939	-125.093	74.515	1382.225	-2.8062	0.86338	-0.10567
3.69	35.144	22.1783	32.79	-0.074219	0.021484	-0.041992	-7.588	21.5375	20.446	-0.0048828	-0.068359	0.023926	8.995	68.049	69.051	-0.12793	-0.01416	-0.12842	-82.667	116.4062	1398.017	-2.814	0.80908	-0.12695
3.692	4.575	7.7959	55.615	-0.098145	0.041504	-0.031738	29.2021	-4.9002	27.3055	-0.020508	-0.05127	0.025391	11.856	35.863	68.972	-0.104	-0.041504	-0.14111	-84.374	118.8119	1373.783	-2.8309	0.76357	-0.15352
3.694	37.669	17.1487	32.275	-0.1084	0.04834	-0.035645	43.0133	20.26335	6.4278	-0.023438	-0.043945	0.020996	47.094	40.144	10.4345	-0.080811	-0.058105	-0.1438	-100.883	128.995	1333.10026	-2.8473	0.73867	-0.17022
3.696	39.8684	14.9275	25.783	-0.11768	0.068359	-0.026855	-1.801	-5.52019	31.2567	-0.03125	-0.020508	0.018066	33.751	-0.190000000000001	21.2776	-0.063477	-0.075195	-0.14893	-114.417	123.657	1315.4185	-2.8672	0.73282	-0.18584
3.698	0.260000000000005	13.929	31.1841	-0.13062	0.077881	-0.022217	54.5548	5.6269	31.968	-0.034424	-0.0063476	0.02002	42.102	7.8966	18.3936	-0.035156	-0.096191	-0.15137	-104.511	107.688	1312.473	-2.8874	0.75596	-0.20283
3.7	3.632	23.996	27.339	-0.13867	0.089355	-0.019531	23.296	27.0296	11.0058	-0.039551	-0.00048828	0.019531	32.366	-16.2272	24.83429	-0.026367	-0.10352	-0.14844	-74.64	149.355	1333.43	-2.9082	0.79102	-0.21875
3.702	14.256	25.738	22.5418	-0.14014	0.10059	-0.015137	21.845	0.101	8.2869	-0.040527	0.021484	0.012207	42.16	7.594	15.9066	-0.014648	-0.11816	-0.14648	-31.5799	149.7455	1299.501	-2.9205	0.83848	-0.23027
3.704	1.166	35.3066	9.1327	-0.1377	0.10303	-0.012695	45.9091	9.8117	16.2846	-0.041016	0.03125	0.010254	33.4492	-9.3673	22.2924	-0.0075683	-0.12207	-0.14404	-16.7508	149.923	1232.817	-2.9254	0.89218	-0.24609
3.706	-27.838	16.9064	28.832	-0.13477	0.10938	-0.013672	0.285	0.4076	13.59437	-0.036133	0.041992	0.0048828	44.302	2.3121	15.9153	-0.0043945	-0.12305	-0.13428	-20.28588	134.643	1160.719	-2.9304	0.94492	-0.25899
3.708	-30.46	11.0966	33.526	-0.12549	0.11109	-0.013428	21.358	-10.49564	12.694	-0.037353	0.053222	-0.00048828	-0.133000000000003	2.923	13.4849	-0.0078125	-0.12744	-0.13135	-11.9423	142.665	1137.076	-2.9294	0.99679	-0.26768
3.71	-5.547	8.2647	26.1852	-0.11621	0.1084	-0.0078125	10.745	13.65049	-4.8899	-0.034668	0.060059	-0.003418	13.826	32.0585	-4.28	-0.013184	-0.13281	-0.125	9.339	165.751	1127.44461	-2.9312	1.0493	-0.26611
3.712	-18.359	26.9336	23.8442	-0.09668	0.099609	-0.013672	-1.73	-1.0787	9.48448	-0.027832	0.064453	-0.0063477	-14.829	34.7487	-25.7819	-0.026855	-0.13086	-0.11621	26.869	195.5856	1098.716	-2.9508	1.0894	-0.26123
3.714	-29.515	25.1232	23.21919	-0.084473	0.092285	-0.016113	8.371	7.95895	12.4621	-0.021973	0.067871	-0.010254	-7.938	55.097	-19.8005	-0.036621	-0.12915	-0.10376	56.36105	206.831	1029.168	-2.9676	1.1281	-0.26015
3.716	-37.537	19.3851	24.2462	-0.066895	0.075684	-0.010254	-16.217	23.317	2.2191	-0.013672	0.068359	-0.02002	-30.825	26.8315	-16.83	-0.048828	-0.12793	-0.09668	75.285	201.7651	975.085	-2.9688	1.1621	-0.25586
3.718	-14.516	19.1888	15.4102	-0.050537	0.064209	-0.016357	-5.428	5.7093	11.79	-0.007324	0.062256	-0.0271	-7.519	38.408	11.4543	-0.065918	-0.12842	-0.078613	61.197	241.613	936.616	-2.9484	1.1855	-0.25879
3.72	-30.492	18.7954	11.2704	-0.035645	0.04834	-0.01709	-12.69	29.257	-2.3216	0.0039063	0.057617	-0.036621	-23.243	29.592	19.2657	-0.075195	-0.12793	-0.073242	60.5985	255.357	931.9733	-2.9121	1.1973	-0.25781
3.722	-35.601	5.0009	31.662	-0.019531	0.03125	-0.013184	-55.384	45.1474	-7.0249	0.017578	0.044922	-0.050293	-13.394	55.6419	31.4315	-0.097168	-0.12598	-0.063965	105.498	294.503	916.1573	-2.8551	1.202	-0.25664
3.724	-20.439	3.5768	33.479	-0.010254	0.024414	-0.022461	-14.731	25.4265	15.2323	0.024902	0.041504	-0.058105	-33.29	54.649	18.6893	-0.11182	-0.12451	-0.056152	92.365	287.631	870.3394	-2.798	1.1935	-0.25996
3.726	-2.193	13.84521	23.35	0.0039063	0.012695	-0.021973	-19.493	44.455	2.36718	0.040039	0.023438	-0.075684	-44.5975	54.138	13.751	-0.11719	-0.125	-0.05127	68.52492	268.084	822.32763	-2.7312	1.1751	-0.26426
3.728	4.896	14.6833	29.682	0.014892	0.0029297	-0.027588	-37.5038	16.0247	4.3317	0.046143	0.016846	-0.088623	-56.6147	58.385	0.206	-0.12842	-0.12646	-0.040039	48.7539	250.083	765.337	-2.6655	1.1353	-0.2624
3.73	-6.03	18.7378	36.2983	0.025391	-0.0019531	-0.033203	-3.793	10.9065	15.7212	0.051758	0.0068359	-0.10596	-11.099	55.171	39.532	-0.13623	-0.12915	-0.030273	50.113	231.1492	748.561	-2.5894	1.0825	-0.25342
3.732	9.853	12.5504	38.2119	0.037109	-0.013672	-0.036621	-49.3792	31.702	-4.7662	0.059082	-0.003418	-0.11963	-20.479	24.7554	36.002	-0.13916	-0.13184	-0.025391	40.69	245.7	723.63	-2.5193	1.0244	-0.24316
3.734	6.27	-6.997	41.144	0.047363	-0.015137	-0.038574	-27.193	15.756	14.3461341	0.062012	-0.012207	-0.13184	-11.421	7.8849	58.409	-0.14697	-0.12695	-0.016113	19.531	221.61	663.729	-2.4445	0.95703	-0.23525
3.736	22.241	-21.638	55.2673	0.059082	-0.018066	-0.044922	19.982	39.098	20.4295	0.068359	-0.01709	-0.14941	-37.25	3.9371	28.0159	-0.14795	-0.12451	-0.01416	-8.819	215.9727	597.7196	-2.3762	0.90195	-0.22041
3.738	12.097	-16.484	69.307	0.072265	-0.020996	-0.057129	-29.175	33.5377	6.3416	0.069824	-0.021973	-0.16382	-32.212	18.32605	37.986	-0.15771	-0.12012	-0.0019531	-46.593	210.15255	533.8419	-2.3057	0.85869	-0.21758
3.74	32.684	-18.26	71.2821	0.081543	-0.022949	-0.069824	24.023	9.711	29.917	0.072266	-0.024414	-0.18066	-5.123	21.1097	31.0209	-0.15552	-0.11621	0.0053711	-24.576	238.502	513.44	-2.2324	0.81152	-0.21143
3.742	50.7751	-27.217	73.9144	0.088867	-0.025391	-0.085938	18.839	26.2182	31.432	0.07959	-0.026855	-0.19873	23.349	20.4665	57.688	-0.15576	-0.10938	0.01709	-13.578	254.986	518.114	-2.1515	0.77666	-0.20478
3.744	31.663	-41.717	103.533	0.1001	-0.023926	-0.10156	-11.879	-4.055	57.6104	0.078125	-0.026855	-0.20801	12.408	19.6968	36.9385	-0.15283	-0.10645	0.029297	-2.98099999999999	245.881	510.826	-2.0679	0.74385	-0.1999
3.746	27.288	-42.538	130.3104	0.104	-0.016113	-0.10791	28.12	-22.588	75.6479	0.077637	-0.026855	-0.23145	8.892	17.5545	47.675	-0.14648	-0.097168	0.036621	-35.224	228.501	460.058	-1.9898	0.71259	-0.19678
3.748	37.801	-25.87	150.6207	0.099608	-0.012695	-0.12378	1.667	-5.745	72.9913	0.077637	-0.027832	-0.25611	12.752	17.0802	6.8498	-0.13525	-0.092773	0.052246	-35.197	201.0301	405.504	-1.9106	0.68155	-0.19541
3.75	45.448	6.1019	195.8286	0.087402	-0.0039063	-0.1333	17.6813	-5.09	96.5122	0.072266	-0.021973	-0.2749	27.308	11.7389	30.4046	-0.12574	-0.090087	0.060303	-37.432	206.513	378.78	-1.8398	0.65234	-0.19336
3.752	17.383	53.3668	290.3081	0.062012	0.0063477	-0.15088	43.7938	12.5749	123.556	0.062012	-0.01709	-0.3042	37.344	9.586	29.849	-0.1123	-0.084961	0.069824	-20.598	189.3131	368.383	-1.7677	0.62139	-0.18584
3.754	49.949	97.3804	364.1148	0.045898	0.016113	-0.15576	34.066	39.7043	149.897	0.050781	-0.012207	-0.31689	51.1388	1.496	32.338	-0.093262	-0.080078	0.08252	-3.657	200.221	310.5588	-1.6992	0.58828	-0.18193
3.756	57.015	102.038	415.823	0.0024414	0.031738	-0.18018	63.715	21.076	202.2054	0.021484	-0.00097656	-0.33643	29.653	6.1795	7.4988	-0.085449	-0.080566	0.083496	-14.275	161.771	245.665	-1.6254	0.5582	-0.17295
3.758	12.857	94.109	445.8978	-0.04126	0.038331	-0.20899	55.966	49.3861	269.145	-0.0097657	0.0056152	-0.35498	28.6406	-3.1847	16.21747	-0.061523	-0.078613	0.094238	-6.451	160.462	179.721	-1.5526	0.53057	-0.16592
3.76	-11.94	89.828	507.495	-0.085449	0.038086	-0.24072	20.644	74.55	403.73908	-0.061035	0.0087891	-0.36865	27.38	2.7588	5.169	-0.042724	-0.082764	0.095215	-12.569	145.303	177.2977	-1.4844	0.5	-0.15625
3.762	-5.27800000000001	73.771	589.308	-0.16895	0.066406	-0.28223	60.401	74.4678	526.1153	-0.1582	0.021973	-0.39941	-17.735	-10.2115	31.3288	-0.022949	-0.086426	0.099609	15.348	126.937	212.4844	-1.4111	0.47529	-0.14805
3.764	23.704	52.9097	640.648	-0.21533	0.083008	-0.29199	26.774	83.2332	572.649	-0.21045	0.024902	-0.40918	12.793	3.845	-6.292	0.0043945	-0.093262	0.10449	55.7404	138.0683	199.7029	-1.3393	0.44649	-0.13594
3.766	-6.168	21.86	655.348	-0.32861	0.13428	-0.30225	7.081	32.4668	632.135	-0.33545	0.048828	-0.43896	1.857	0.797	-11.135	0.015137	-0.092285	0.104	66.5247	107.9563	157.1963	-1.2725	0.42031	-0.12851
3.768	-5.1	-14.319	629.0109	-0.42651	0.1748	-0.30688	8.49	13.1896	687.123	-0.44702	0.067871	-0.45362	29.984	25.9768	-3.225	0.038086	-0.10352	0.10205	74.0648	112.227	133.706524	-1.2071	0.38789	-0.12637
3.77	-18.54909	-49.6958	604.63426	-0.53613	0.22217	-0.30273	-38.1634	-19.139	757.605	-0.56787	0.091309	-0.45557	-28.7041	-1.793	11.374	0.054688	-0.10449	0.10351	64.5203	117.631	114.4556	-1.1426	0.35791	-0.11768
3.772	-11.1406	-47.766	624.3466	-0.69092	0.271	-0.27686	8.936	-74.851	833.119	-0.74756	0.12988	-0.45654	-17.506	32.6777	8.0247	0.067871	-0.10791	0.10254	88.9475	125.86	120.3864	-1.078	0.32744	-0.11768
3.774	-19.1686	-23.7258	666.9305	-0.77344	0.30469	-0.26172	3.671	-60.422	787.649	-0.8418	0.15723	-0.45703	-49.9774	14.5747	4.292	0.093262	-0.10938	0.098145	91.342	127.777	92.321	-1.0148	0.29424	-0.11152
3.776	-20.7446	-3.227	716.479	-0.95605	0.38232	-0.24023	-36.335	-100.9689	766.644	-1.0576	0.20996	-0.41797	-1.813	38.4206	-5.143	0.10352	-0.11133	0.099121	94.637	95.426	52.363	-0.94922	0.26299	-0.10957
3.778	-11.609	4.495	739.144	-1.1069	0.4502	-0.22925	-3.7962	-121.992	777.658	-1.2409	0.27002	-0.37647	-16.735	22.0164	22.0486	0.12549	-0.11768	0.09082	59.225	63.571	28.8142	-0.88506	0.23233	-0.10713
3.78	-76.058	-4.653	736.021	-1.2476	0.52588	-0.20947	-31.43	-74.731	777.22807	-1.459	0.34521	-0.33203	-33.814	50.134	-8.38441	0.1416	-0.11621	0.091064	50.6813	49.398	18.3875	-0.82031	0.20117	-0.10791
3.782	-62.735	-19.6243	776.352	-1.3984	0.61133	-0.17529	-35.895	-73.469	832.428	-1.8101	0.48682	-0.27881	-49.9939	44.756	-14.6256	0.1582	-0.1167	0.07959	30.753	66.696	26.6557	-0.75537	0.16933	-0.10186
3.784	-34.5155	-15.442	807.359	-1.4766	0.65039	-0.18066	-11.696	-73.751	868.5692	-1.9878	0.56982	-0.26074	-14.929	79.312	-5.0804	0.17773	-0.12061	0.068848	8.771	49.639	31.7583	-0.68662	0.13486	-0.10283
3.786	19.103	-9.097	821.157	-1.6187	0.74658	-0.20605	-78.972	-89.208	880.204	-2.3276	0.75244	-0.22705	-43.0742	35.061	13.6736	0.1875	-0.11963	0.060547	24.522	43.3624	37.944	-0.61631	0.097364	-0.096582
3.788	2.87	-3.878	817.1871	-1.6841	0.82862	-0.24317	-88.254	-146.289	923.018	-2.5308	0.90186	-0.23779	-40.06	42.8861	18.19375	0.20801	-0.11865	0.042969	-10.854	5.01475	15.7407	-0.54336	0.05957	-0.096191
3.79	-5.111	-39.357	814.9368	-1.7202	0.90283	-0.28271	-36.9246	-118.924	955.458	-2.6426	1.0488	-0.24707	-26.195	12.422	28.489	0.22046	-0.1189	0.031494	-15.137	8.393	24.9066	-0.47217	0.025879	-0.096191
3.792	5.42	-69.399	828.34731	-1.7148	1.001	-0.32227	-23.133	-96.921	982.6523	-2.6187	1.2173	-0.25928	19.276	53.162	16.27713	0.22656	-0.11475	0.019043	-37.31238	33.44844	15.9389	-0.40556	-0.013379	-0.10156
3.794	15.456	-92.098	833.037	-1.6655	1.0435	-0.33643	40.455	-89.018	1024.435	-2.5503	1.2935	-0.28955	-3.78	38.385	45.428	0.22998	-0.10986	0.003418	-35.506	31.0129	56.244	-0.33926	-0.046582	-0.10039
3.796	57.5402	-122.6775	870.035	-1.5483	1.0747	-0.34912	3.732	-66.068	996.77	-2.3418	1.4082	-0.35254	12.207	62.854	58.221	0.22803	-0.10449	-0.003418	-58.6973	41.3416	46.521	-0.27402	-0.07666	-0.10039
3.798	33.584	-144.594	929.2081	-1.4532	1.0572	-0.3706	-19.1009	-134.42	996.801	-2.165	1.4673	-0.40674	-3.084	11.83434	36.8292	0.21338	-0.089355	-0.015625	-53.1969	-8.7474	32.16866	-0.22539	-0.099414	-0.10762
3.8	18.447	-148.502	963.266	-1.3613	1.0098	-0.38281	24.4528	-179.2891	1042.055	-1.998	1.4961	-0.44922	24.819	19.939	24.8378	0.1936	-0.078125	-0.025635	-67.478	-1.8404	23.1094	-0.19092	-0.11768	-0.11621
3.802	-24.388	-167.184	993.676	-1.2749	0.89404	-0.38037	18.2171	-164.1291	1104.984	-1.8491	1.4048	-0.49756	27.06	-7.67936	17.6177	0.17041	-0.063965	-0.032715	-83.456	-14.7897	23.98018	-0.14131	-0.13555	-0.10957
3.804	-29.969	-168.212	1024.337	-1.2441	0.81641	-0.37695	59.916	-217.943	1213.631	-1.8022	1.3013	-0.51318	44.874	37.8693	44.723	0.13379	-0.040039	-0.040039	-45.2866	-2.0953	52.259	-0.086719	-0.15889	-0.095801
3.806	-13.742	-164.692	1081.699	-1.2124	0.65479	-0.35791	25.012	-194.17	1253.473	-1.7344	1.0137	-0.49414	30.872	10.2117	56.241	0.11328	-0.021973	-0.040527	-72.395	11.552	34.941	-0.038281	-0.1917	-0.080175
3.808	2.362	-143.8272	1115.711	-1.2182	0.54639	-0.34986	-65.2585	-205.283	1244.402	-1.6933	0.78955	-0.4497	17.063	26.48	42.722	0.073242	0.0083008	-0.041992	-63.0903	1.69	23.2277	0.014453	-0.22148	-0.071094
3.81	30.373	-116.994	1116.984	-1.2456	0.45264	-0.35156	-33.95435	-237.059	1287.799	-1.6694	0.58057	-0.40527	-0.469000000000001	-8.1394	8.6794	0.036865	0.026367	-0.046143	-21.129	21.62048	-6.54802	0.051758	-0.24561	-0.071289
3.812	21.083	-92.351	1138.166	-1.3184	0.37891	-0.36768	-28.583	-144.544	1310.7	-1.6973	0.35645	-0.36621	20.004	12.6593	23.744	0.0073242	0.043945	-0.050781	-6.091	18.36014	18.169	0.074219	-0.26485	-0.072754
3.814	28.341	-74.078	1151.009	-1.3633	0.36328	-0.375	19.665	-108.586	1367.007	-1.7222	0.27393	-0.35156	27.749	-7.30224	27.772	-0.035645	0.07666	-0.046875	1.483	25.433	24.174	0.092774	-0.28506	-0.065136
3.816	69.751	-78.374	1175.77	-1.48	0.37256	-0.38428	62.3	-75.745	1418.397	-1.8374	0.17627	-0.31445	16.095	21.0818	53.196	-0.057617	0.089844	-0.051758	21.516	3.2776	40.5318	0.10957	-0.29287	-0.068262
3.818	67.342	-75.454	1184.05295	-1.5752	0.41675	-0.39991	34.6835	-10.589	1387.268	-1.9502	0.16162	-0.28027	17.543	7.3526	34.3229	-0.088867	0.11719	-0.048828	59.6817	16.454	20.6651	0.12226	-0.30147	-0.066016
3.82	40.814	-85.867	1179.674	-1.6792	0.47705	-0.4126	54.138	-66.621	1403.416	-2.0776	0.19727	-0.25342	-8.086	-8.107	53.3933	-0.10913	0.13477	-0.054444	15.7854	13.1524	1.5758	0.13574	-0.31006	-0.065918
3.822	5.736	-73.084	1207.5483	-1.7993	0.57666	-0.43555	72.7163	-40.643	1425.467	-2.2515	0.33203	-0.24463	-8.372	-62.746	65.35	-0.12012	0.14941	-0.063965	62.454	20.0626	27.0503	0.14463	-0.31347	-0.062695
3.824	23.137	-74.241	1230.918	-1.8777	0.65503	-0.44849	61.3875	-9.343	1445.7476	-2.3296	0.42725	-0.24854	-43.1798	-71.8834	96.86925	-0.13525	0.1665	-0.075195	60.1607	29.832	12.262	0.15039	-0.31836	-0.060156
3.826	-5.171	-47.372	1263.27524	-1.9468	0.72363	-0.45459	68.383	-40.447	1490.1956	-2.4546	0.61768	-0.26709	-24.116	-48.3337	132.5765	-0.13525	0.16992	-0.086426	67.4779	13.4142	16.181	0.1457	-0.31993	-0.058203
3.828	11.082	-47.4666	1305.3916	-2.0112	0.79346	-0.45801	7.966	17.51	1448.2023	-2.5229	0.75684	-0.2749	-24.43841	-12.9648	197.642	-0.13037	0.17041	-0.11377	78.063	27.791	2.7872	0.13008	-0.31797	-0.05957
3.83	14.879	-69.77	1336.3878	-2.0391	0.82227	-0.45605	-15.737	-22.4568	1436.582	-2.584	0.87891	-0.28613	9.052	-12.9548	216.144	-0.12011	0.17432	-0.14282	67.3225	13.0636	-2.2657	0.10693	-0.31494	-0.054688
3.832	16.17	-63.4256	1333.967	-2.0859	0.86328	-0.44629	11.644	-73.587	1484.3563	-2.6519	1.0132	-0.30518	-3.639	-15.5335	303.6974	-0.10449	0.1665	-0.16699	54.119	34.57168	21.4813	0.08125	-0.29922	-0.048242
3.834	25.974	-71.7016	1346.032	-2.1169	0.88598	-0.44019	-7.947	-25.062	1517.5487	-2.6948	1.082	-0.33935	-23.781	-5.68736	344.403	-0.066406	0.1582	-0.2041	48.0445	19.1358	26.1959	0.053223	-0.28681	-0.046485
3.836	55.462	-70.226	1378.93	-2.1484	0.90137	-0.43848	28.731	-98.344	1583.503	-2.728	1.1255	-0.3584	-44.39	52.36466	437.385	-0.053711	0.14844	-0.21973	58.6131	17.467	32.0485	0.017676	-0.26338	-0.028125
3.838	88.902	-52.284	1380.176	-2.189	0.92041	-0.42627	45.877	-74.55	1587.577	-2.7417	1.1353	-0.39893	-15.291	106.109	521.985	-0.011719	0.13037	-0.25439	25.626	17.156	10.33161	-0.024219	-0.2418	-0.023633
[truncated: 28,081 more rows]
